# Supplementary material for: Distinct brain and lung endothelial miRNA/mRNA profiles after exposure to Plasmodium falciparum-infected red blood cells
Source: iScience. 2024 Oct 28;27(11):111265. doi: 10.1016/j.isci.2024.111265 (PMC11576406; doi:10.1016/j.isci.2024.111265)
Supplement: Table S1. miRNA profiles of HBMECstatic and HMVEC-Lstatic [file mmc2.xlsx]

## Sheet: mature miRNA
Name	prim-brain#1	prim-brain#2	prim-brain#3	prim-brain#4	prim-brain#5	prim-lung#1	prim-lung#2	prim-lung#3	prim-lung#4	Fold change	Log fold change	P-value	FDR p-value
hsa-miR-126-5p	2838.25	3564.67	2563.37	2694.42	2606.33	1.31543	0.410839	0.968069	1.73001	-2362.83	-11.2063	1.7877e-27	7.23123e-25
hsa-miR-126-3p	677312	573965	845140	644816	1.06285e+06	281.704	182.824	179.13	219.221	-3527.7	-11.7845	1.348e-27	7.23123e-25
hsa-miR-139-5p	7396.33	5964.82	8585.78	35439.4	6260.02	10.5234	8.42221	12.3987	9.59664	-1242.11	-10.2786	1.03409e-24	2.26302e-22
hsa-miR-10b-5p	993.482	932.91	6208.73	5753.9	7808.77	1.82136	1.54065	1.5638	1.5668	-2669.39	-11.3823	1.11892e-24	2.26302e-22
hsa-miR-199b-5p	0.579797	0.609825	0	0	0	950.752	1453.34	276.756	184.556	3148.89	11.6206	3.3007e-20	4.45045e-18
hsa-miR-490-5p	0.579797	0.975719	0	0	2.23962	1054.47	1070.85	2670.57	1465.84	2054.1	11.0043	3.22535e-20	4.45045e-18
hsa-miR-150-5p	14.0601	11.0988	1232.51	2419.69	1585.06	0.708308	0.718969	0.1117	0.163208	-2519.69	-11.299	3.07867e-17	3.55807e-15
hsa-miR-139-3p	45.804	49.6397	143.66	460.426	223.767	0.101187	0	0	0.0326416	-5664.22	-12.4677	1.03502e-15	1.04666e-13
hsa-miR-143-3p	21.4525	25.4907	19.7935	31.2442	25.4148	5935.32	6113.91	5813.26	5987.35	240.423	7.90943	2.22312e-15	1.99834e-13
hsa-miR-196b-5p	1255.55	1335.64	638.779	604.259	928.857	1.31543	0.718969	3.12761	3.03567	-444.991	-8.79763	1.08162e-14	8.75032e-13
hsa-miR-708-5p	0.144949	0	0	0	0	137.918	125.306	122.461	113.919	3901.3	11.9297	4.66879e-14	3.43368e-12
hsa-miR-326	20.148	18.0508	36.2998	110.546	50.927	0.202374	0	0.148934	0	-540.008	-9.07684	6.55479e-12	4.41902e-10
hsa-miR-146a-5p	3552.56	3238.29	1405.62	1011.39	1583.7	50.9982	39.4406	10.202	14.1012	-75.3905	-6.23631	8.00642e-10	4.98246e-08
hsa-miR-497-5p	124.366	123.307	431.961	384.937	507.614	2.73205	3.0813	0	0.0326416	-217.849	-7.76719	1.01494e-09	5.86488e-08
hsa-miR-145-5p	3.62373	3.29305	0.0699418	0.272281	0.0973747	359.517	297.345	108.051	185.372	163.178	7.3503	2.25721e-09	1.21739e-07
hsa-miR-195-5p	38.5565	37.5652	795.238	1272.44	657.863	1.11306	1.84878	5.06375	7.08323	-147.348	-7.20308	5.08823e-09	2.57274e-07
hsa-miR-451a	106.973	138.308	125.895	76.9193	10319.4	4.95816	8.52492	18.2071	18.8016	-170.423	-7.41298	1.61959e-08	7.70735e-07
hsa-miR-296-5p	0.144949	0.121965	0	0	0.0973747	24.2849	18.8986	20.7018	5.81021	244.349	7.9328	5.05794e-08	2.27326e-06
hsa-miR-145-3p	0	0	0	0	0	9.41038	14.6875	28.8931	86.3044	2584.28	11.3355	1.52075e-07	6.16706e-06
hsa-miR-1468-5p	0	0.365895	0	0	0.0973747	4.85697	3.49213	22.8986	22.3922	141.724	7.14695	1.52461e-07	6.16706e-06
hsa-miR-369-5p	173.214	162.457	9.30226	7.55579	32.3284	532.547	567.369	9487.94	8917.23	63.3588	5.98547	6.55212e-07	2.47445e-05
hsa-miR-187-3p	6.08787	2.4393	109.389	135.051	171.574	0.101187	0	0.0744669	1.66472	-176.511	-7.46361	6.72903e-07	2.47445e-05
hsa-miR-195-3p	6.08787	5.24449	57.3523	66.2322	123.666	0.607121	1.43794	0.744669	0.0652832	-73.5011	-6.19969	1.12973e-06	3.97372e-05
hsa-miR-4636	0	0	0	0	0	9.91631	9.96285	16.4572	9.46607	853.29	9.73689	2.01535e-06	6.7934e-05
hsa-miR-494-5p	0.869696	1.46358	0	0	0.0973747	11.7377	9.86014	89.1368	66.5236	92.3061	6.52835	2.76285e-06	8.9406e-05
hsa-miR-3182	0.579797	0.121965	0	0	0	114.341	44.8842	0	0	272.954	8.09251	3.28027e-06	0.000102067
hsa-miR-10401-3p	0	0	0.0699418	0	0.292124	0.101187	0	18.505	27.9739	133.996	7.06605	4.28123e-06	0.000128278
hsa-miR-330-5p	4.78333	3.90288	78.125	107.279	132.624	1.01187	0.513549	0.819136	2.21963	-56.4364	-5.81855	5.14175e-06	0.00014856
hsa-miR-183-5p	4.63838	5.36646	417.413	35.8049	252.2	2.3273	2.36233	0	2.83982	-75.9648	-6.24726	5.57737e-06	0.000155589
hsa-miR-376b-5p	0	0	0	0	0	0	0	29.824	38.2233	1268.05	10.3084	7.07976e-06	0.000190917
hsa-miR-29c-3p	53.9211	64.2755	132.26	231.575	140.901	4.85697	4.41652	1.71274	3.32945	-35.1971	-5.13738	8.93449e-06	0.000233161
hsa-miR-206	0.434848	0.121965	4.12657	16.3368	7.98472	0.101187	0	0	0	-262.281	-8.03497	1.46465e-05	0.000359062
hsa-miR-147b-3p	0.144949	0	30.7744	20.7614	54.8219	0	0	0	0	-4182.27	-12.0301	1.45799e-05	0.000359062
hsa-miR-493-3p	67.4014	47.0785	0	0	0.194749	1897.96	2026.88	849.332	839.053	61.1818	5.93503	1.52062e-05	0.000361817
hsa-miR-96-5p	2.75404	3.29305	58.3315	7.2835	95.6219	0.809495	1.43794	0.707435	0	-45.7107	-5.51446	1.63969e-05	0.000379004
hsa-miR-652-3p	273.084	270.03	6152.85	8328.79	8102.35	69.0095	44.1652	226.64	239.851	-31.9125	-4.99605	2.83434e-05	0.000636939
hsa-miR-618	0	0	0	0	0	3.64273	4.51923	6.32968	6.56097	400.408	8.64533	2.97804e-05	0.000651144
hsa-miR-5699-3p	0.434848	0.24393	0	0	0	4.85697	3.69755	4.39355	6.07134	45.633	5.512	3.60716e-05	0.000767946
hsa-miR-323b-3p	1.88434	2.56126	0	0.13614	0.584248	4.85697	3.69755	102.653	90.2214	48.8967	5.61167	3.86747e-05	0.000802252
hsa-miR-493-5p	48.9929	44.1513	0	0.0680701	0.194749	1752.76	1746.07	162.152	309.769	53.1332	5.73154	4.07808e-05	0.000824791
hsa-miR-338-5p	0.144949	0.121965	13.3589	16.8814	18.9881	0	0	0	0	-1949.74	-10.9291	5.02847e-05	0.000992202
hsa-miR-490-3p	0	0	0	0	0	1.72018	0.924389	10.3881	4.17813	321.866	8.33032	6.76173e-05	0.00130244
hsa-miR-149-5p	191.768	142.821	53.9251	27.7726	83.4501	2023.84	1824.23	1875.82	1592.16	18.3113	4.19466	8.57527e-05	0.00161335
hsa-miR-376c-5p	0.144949	0.121965	0	0.0680701	0	0	0.10271	11.0211	13.7095	82.7143	6.37006	9.77281e-05	0.00175693
hsa-miR-10b-3p	2.60909	2.56126	9.16238	14.567	4.47924	0	0	0	0	-1326.6	-10.3735	9.58157e-05	0.00175693
hsa-miR-342-5p	0	0	26.9975	6.33052	10.6138	0	0	0	0	-1727.39	-10.7544	0.000103263	0.00181609
hsa-miR-29b-2-5p	0	0.121965	15.2473	8.23649	9.25059	0	0.30813	0	0	-91.6441	-6.51797	0.000105877	0.00182243
hsa-miR-4521	0	0	0	0	0	0.303561	0	6.25522	13.3504	371.408	8.53686	0.000119217	0.0020093
hsa-miR-4423-5p	0.724746	0.365895	0	0	0	4.45222	4.10839	6.47862	6.0387	33.0381	5.04606	0.000153179	0.00252902
hsa-miR-148a-3p	0.144949	0.853755	0.0699418	0	0.973747	1.92255	2.67046	16.4199	21.1844	25.5984	4.67798	0.000175844	0.00284515
hsa-miR-335-3p	0.144949	0.48786	294.175	115.107	454.545	1.61899	3.28671	2.42017	11.5878	-36.4698	-5.18863	0.000235639	0.003666
hsa-miR-338-3p	0.144949	0.853755	5.38552	17.5621	4.18711	0	0	0	0	-1113.11	-10.1204	0.000235123	0.003666
hsa-miR-134-3p	0.869696	0	0	0	0	0.708308	1.23252	17.5742	11.5878	46.0817	5.52612	0.000240531	0.00367149
hsa-miR-378d	0.289899	0	1.53872	3.88	5.64773	0	0	0.0372334	0	-132.722	-7.05226	0.000258487	0.00387252
hsa-miR-335-5p	0.144949	0	215.491	109.116	137.396	1.01187	1.23252	0.0744669	4.63511	-52.8793	-5.72463	0.000277811	0.00408634
hsa-miR-654-3p	23.4818	18.7826	0.209825	0.272281	2.62912	114.948	110.927	362.803	361.277	26.2001	4.7115	0.000305444	0.00435957
hsa-miR-196a-5p	132.918	126.478	1.32889	3.13123	14.801	1.11306	0.718969	3.27654	1.50151	-33.3976	-5.06167	0.000307164	0.00435957
hsa-miR-144-3p	0.289899	0	0	0	38.7551	0	0	0	0	-1529.01	-10.5784	0.00031797	0.00443513
hsa-miR-29c-5p	61.7484	45.249	178.561	213.128	214.419	7.58902	9.86014	4.43078	9.13965	-18.4242	-4.20353	0.000366285	0.00502245
hsa-miR-365b-5p	0.579797	0.975719	24.4796	25.3221	77.1207	0	0.10271	2.94144	0	-33.1208	-5.04966	0.000380669	0.00509395
hsa-miR-615-3p	11.5959	11.4647	0	0.13614	1.36325	0.101187	0	0.260634	0	-49.3299	-5.62439	0.000384093	0.00509395
hsa-miR-485-5p	28.8449	29.0277	0.699418	0.408421	0.973747	163.012	149.546	339.83	450.879	23.0225	4.52497	0.000411147	0.00536481
hsa-miR-411-3p	14.0601	17.0751	0.139884	0.20421	1.07112	77.8127	66.1451	225.411	179.757	21.1163	4.40029	0.000435156	0.00558796
hsa-miR-217-3p	7.10252	4.8786	0	0	0.292124	0.101187	0	0	0	-101.268	-6.66204	0.000455006	0.00575156
hsa-miR-548h-5p	2.17424	1.46358	0	0	0	29.4454	33.5861	13.8136	9.66192	30.0514	4.90936	0.000501721	0.00624449
hsa-miR-34b-3p	0	0	1810.58	3157.3	3329.53	2.02374	2.46504	61.5841	77.1974	-46.316	-5.53344	0.000515057	0.00631334
hsa-miR-9985	8.98686	3.65895	8.67278	21.4421	38.7551	0.708308	0.924389	1.41487	0.0979249	-20.723	-4.37316	0.00060035	0.007249
hsa-miR-376a-2-5p	0	0	0	0	0	0	0	5.58501	5.45115	206.499	7.68999	0.000780819	0.00853625
hsa-miR-296-3p	0	0	0	0	0	0.404748	1.95149	1.4521	3.78643	143.288	7.16277	0.000723605	0.00853625
hsa-miR-7704	0	0.48786	0.0699418	0	0	1.31543	0.20542	8.89879	3.72114	30.3708	4.92461	0.000773546	0.00853625
hsa-miR-3605-5p	1.01465	0.48786	0	0	0	7.08308	5.13549	3.57441	5.67964	19.5549	4.28946	0.000738743	0.00853625
hsa-miR-4510	5.79797	3.29305	277.529	285.01	62.5145	12.6484	7.08698	2.30847	2.15435	-21.0085	-4.3929	0.000758197	0.00853625
hsa-miR-877-3p	1.30454	2.56126	134.148	134.575	115.876	1.72018	1.43794	3.35101	5.35323	-26.0505	-4.70324	0.000771171	0.00853625
hsa-miR-345-3p	0	0	0	0	24.7332	0	0	0	0	-968.777	-9.92002	0.000769898	0.00853625
hsa-miR-223-3p	0.289899	0.365895	0.349709	1.02105	5.93986	0	0	0	0.0326416	-95.2819	-6.57413	0.000934685	0.0100821
hsa-miR-1269a	0	0	0	0	0	1.72018	2.97859	1.37764	1.33831	130.92	7.03254	0.00103776	0.0110467
hsa-miR-122b-5p	0	0	0	0	0	0.303561	0.30813	1.7872	4.4719	130.05	7.02292	0.00106582	0.0110544
hsa-miR-30c-5p	102.479	113.305	1537.04	1928.36	1766.86	56.1587	63.7828	87.6847	107.848	-13.813	-3.78796	0.00106172	0.0110544
hsa-miR-210-5p	2.60909	0.853755	0	0	0	4.14866	7.90866	18.5795	22.8165	19.5613	4.28993	0.00113231	0.0114505
hsa-miR-5581-3p	4.34848	2.19537	0.0699418	0	0.0973747	27.3205	29.7859	26.9198	13.5136	18.3306	4.19619	0.00113003	0.0114505
hsa-miR-1270	0.579797	0	0	0	0.194749	7.08308	4.51923	1.7872	1.10982	25.0132	4.64462	0.0013524	0.0135073
hsa-miR-135b-5p	0.579797	0.73179	112.466	118.442	73.3231	1.11306	4.72465	2.30847	3.59058	-20.7984	-4.3784	0.00141921	0.0140018
hsa-miR-4728-3p	0	0	0	0	0	1.92255	1.33523	0.819136	1.99114	111.728	6.80384	0.00152809	0.0148942
hsa-miR-380-5p	0	0	0	0	0	0	0	1.48934	6.10398	142.524	7.15506	0.00156681	0.0150899
hsa-miR-301a-3p	56.5302	52.079	167.021	185.219	128.048	6.88071	19.6176	6.03182	2.18699	-13.6424	-3.77003	0.00158884	0.015122
hsa-miR-3622a-5p	0	0.121965	0	0	0	0.505934	1.23252	1.0053	1.99114	38.3924	5.26275	0.00163676	0.01522
hsa-miR-216a-5p	4.78333	4.8786	0.0699418	0.13614	0.389499	0	0	0	0	-402.401	-8.65249	0.0016258	0.01522
hsa-miR-7705	6.66767	6.34218	0	0	0	0	0	0	0	-510.589	-8.99602	0.00174871	0.0160762
hsa-miR-219a-1-3p	0.434848	0.48786	0	0	0	3.13679	2.0542	1.74997	7.14851	21.2581	4.40994	0.00180865	0.0164404
hsa-miR-380-3p	0.144949	0.121965	0	0	0.292124	0.607121	0.616259	4.31908	4.37398	21.9779	4.45798	0.00199987	0.0179766
hsa-miR-328-5p	0	0	5.24564	0	5.64773	0	0	0	0	-430.248	-8.74903	0.00207932	0.0184853
hsa-miR-7114-3p	0.144949	0	0	0	0	0.202374	1.12981	1.2287	1.9585	35.8626	5.16441	0.00220048	0.0193499
hsa-miR-182-5p	12.6106	11.5867	28.3264	2.38245	61.6382	1.5178	4.31381	2.34571	0.881324	-10.3486	-3.37137	0.00230936	0.0200889
hsa-miR-486-5p	0.869696	0.73179	11.4005	9.05333	41.9685	0.404748	0.513549	0.968069	1.04453	-17.1216	-4.09775	0.00237948	0.0204787
hsa-miR-147b-5p	0	0	1.11907	3.26737	4.08974	0	0	0	0	-337.239	-8.39763	0.00255744	0.0217786
hsa-miR-758-5p	0	0	0	0	0	0	0	2.64357	3.46001	114.851	6.84362	0.00267879	0.0225744
hsa-miR-132-5p	308.742	333.452	41.2657	72.6989	72.9336	1824.5	1696.05	1127.2	1440.87	9.18192	3.1988	0.00283046	0.0231297
hsa-miR-328-3p	114.51	95.7425	956.734	1826.66	1532.68	62.4323	86.9952	79.7168	84.0848	-11.5598	-3.53105	0.00282854	0.0231297
hsa-miR-98-3p	3.91363	4.63467	0.979185	1.63368	10.0296	0	0.718969	0.297867	0	-17.2463	-4.10821	0.00281829	0.0231297
hsa-miR-6756-3p	20.8727	20.4901	0.0699418	0	0.0973747	0.404748	0.10271	0.819136	0	-24.5226	-4.61604	0.0029969	0.0242449
hsa-miR-4474-3p	0.144949	0.121965	0	0	0	0.202374	0.410839	5.88288	0.0326416	28.4321	4.82945	0.00309566	0.024418
hsa-miR-129-5p	2.02929	1.95144	0.139884	2.0421	0.292124	28.13	14.9956	4.43078	5.22266	10.1995	3.35042	0.00305114	0.024418
hsa-miR-3085-5p	6.37777	3.17109	0	0	0	0	0	0	0	-374.776	-8.54988	0.00310884	0.024418
hsa-miR-6720-5p	0	0	0	0	0	0.101187	0.513549	1.63827	2.02378	82.1765	6.36065	0.0031503	0.0244527
hsa-miR-4473	0.724746	0.853755	0	0	0.194749	1.5178	2.46504	6.29245	7.50757	13.2022	3.7227	0.00320393	0.0244527
hsa-miR-1249-3p	1.88434	1.70751	28.9559	29.8828	47.6162	1.72018	1.12981	0.819136	4.56983	-10.6104	-3.40741	0.00317747	0.0244527
hsa-miR-30c-2-3p	10.4363	10.7329	77.7054	47.0365	150.152	7.6902	8.3195	1.41487	0.881324	-13.0165	-3.70227	0.00342806	0.0259187
hsa-miR-5690	0	0.121965	0	0	0.0973747	0.809495	0.20542	1.60104	2.61133	26.0327	4.70225	0.00356248	0.0264408
hsa-miR-379-3p	29.4247	32.9305	0	0.816842	0.389499	138.322	137.323	230.661	148.03	12.8721	3.68617	0.00356021	0.0264408
hsa-miR-3922-3p	0	0	0	0	0	0.505934	0.30813	0	4.34134	97.0681	6.60093	0.00379451	0.0277012
hsa-miR-340-3p	6.37777	4.8786	1082.07	1287.55	1571.63	1.31543	0.821679	108.461	73.1172	-17.205	-4.10476	0.00380079	0.0277012
hsa-miR-548o-3p	0.579797	0.73179	0	0	0	0.607121	1.23252	2.49464	10.9349	14.9316	3.9003	0.00390911	0.0282364
hsa-miR-378i	0.434848	0.609825	99.6671	130.014	76.6339	0	0	4.50525	6.29983	-22.6295	-4.50013	0.00397576	0.0284636
hsa-miR-199a-5p	85.3751	111.964	0	0	0	2371.01	2680.93	0.0372334	0.0652832	31.9943	4.99974	0.00414209	0.0291831
hsa-miR-655-5p	1.15959	0.73179	0	0	0	7.89258	4.93007	4.61695	2.31755	13.6198	3.76764	0.00416814	0.0291831
hsa-miR-99b-5p	6434.15	6121.18	33164.3	33927.9	33722.4	3551.86	3034.97	3126.6	2961.05	-7.15581	-2.83911	0.00425662	0.0291831
hsa-miR-1306-3p	0	0	24.9692	21.2379	39.5341	0	0	1.89891	0.81604	-24.797	-4.6321	0.00424171	0.0291831
hsa-miR-183-3p	0	0	1.25895	0	7.01098	0	0	0	0	-327.003	-8.35316	0.00423382	0.0291831
hsa-miR-1908-3p	0.289899	0.121965	0	0	0.0973747	0.809495	0.410839	1.26594	3.78643	16.814	4.07159	0.00457875	0.0311278
hsa-miR-1293	0.144949	0	0	0	0	0.505934	0.10271	0.856369	2.12171	28.0367	4.80925	0.00477596	0.0321377
hsa-miR-146a-3p	2.89899	4.02484	0	0	0	0	0	0	0	-272.186	-8.08845	0.00480675	0.0321377
hsa-miR-370-3p	21.4525	27.4421	0.279767	0.272281	2.14224	43.0044	45.0896	156.418	218.275	11.2228	3.48836	0.0051856	0.0343865
hsa-miR-548w	0.579797	0.365895	0	0	0	0.607121	1.0271	3.53718	5.81021	15.6439	3.96753	0.00545529	0.0358807
hsa-miR-1294	3.62373	2.68323	0	0	0.486873	20.8445	16.4336	9.79239	10.38	10.6492	3.41268	0.00550537	0.0359181
hsa-miR-378g	0	0	1.6786	1.42947	2.04487	0	0	0.0744669	0.0326416	-27.0075	-4.75529	0.00568604	0.0368001
hsa-miR-199a-3p	753.156	649.219	0.0699418	1.3614	32.9126	5942	7046.51	742.621	408.379	12.3018	3.6208	0.00580827	0.0372928
hsa-miR-424-3p	49.5727	47.0785	0	0.13614	0.486873	430.55	285.739	182.258	194.413	14.0453	3.81202	0.00590183	0.0375951
hsa-miR-3126-5p	0	0	0	0	0	1.31543	0.30813	0.707435	0.979249	62.359	5.96253	0.00620973	0.0387034
hsa-miR-30a-5p	94.5069	79.1552	3912.27	5504.42	2834.58	10.1187	20.0284	324.75	620.876	-10.1859	-3.3485	0.00626717	0.0387034
hsa-miR-103a-1-5p	0	0.24393	3.42715	1.70175	0	0.101187	0	0	0.0326416	-31.915	-4.99616	0.00614948	0.0387034
hsa-miR-1250-5p	3.04394	3.04912	0	0	0	0	0	0	0	-239.471	-7.90371	0.00624418	0.0387034
hsa-miR-301a-5p	4.20353	3.78091	60.7095	53.7754	68.7465	1.01187	1.84878	2.94144	7.80135	-11.1611	-3.48041	0.00670797	0.0411118
hsa-miR-10399-3p	1.59444	2.68323	0	0	0.389499	0	0	0	0	-183.415	-7.51897	0.00737958	0.0448878
hsa-miR-383-5p	0	0	0	0	0	2.02374	2.15691	0	0	77.1343	6.2693	0.00750817	0.0453292
hsa-miR-148b-5p	0	0	13.4988	3.33544	2.53174	0	0	0.670202	0	-21.6289	-4.43489	0.00794066	0.0468905
hsa-miR-9-3p	0.869696	0.853755	0	0	2.72649	0	0	0	0	-176.39	-7.46263	0.00783298	0.0468905
hsa-miR-187-5p	0	0	5.24564	0.0680701	0	0	0	0	0	-212.278	-7.72981	0.00791298	0.0468905
hsa-miR-6880-3p	0	0.121965	0	0	0	1.01187	1.0271	1.52657	0.0326416	27.0621	4.7582	0.00799916	0.0468936
hsa-miR-337-3p	682.131	558.477	2.79767	3.26737	17.3327	1153.33	1596.21	3560.34	3122.27	9.32787	3.22155	0.00822255	0.0478564
hsa-miR-4732-3p	0.144949	0	0	0	5.25823	0	0.10271	0	0	-43.1787	-5.43225	0.00853532	0.049322
hsa-miR-6791-3p	0.144949	0.24393	0	0	0	0.303561	0.924389	1.48934	1.14246	14.5394	3.8619	0.00860926	0.0493964
hsa-miR-4448	1.15959	1.70751	0.0699418	4.5607	0	9.41038	2.36233	35.3345	23.2735	11.5996	3.536	0.00882751	0.0502919
hsa-miR-92b-3p	369.766	385.897	164.433	126.61	260.575	2002.99	1653.94	1591.13	1793.36	6.73537	2.75176	0.00897376	0.0507677
hsa-miR-582-5p	224.671	204.779	87.6371	58.268	176.443	11.6365	20.3365	26.8081	13.2199	-8.33967	-3.05999	0.00930466	0.0522741
hsa-miR-6724-5p	0.434848	0.121965	0	0	0	0	0.30813	4.05844	2.5134	15.8544	3.98681	0.00967907	0.0540025
hsa-miR-340-5p	137.702	124.282	151.984	123.343	293.487	17.6065	26.3964	17.2018	22.6206	-7.93537	-2.9883	0.00998565	0.0553315
hsa-miR-181a-2-3p	170.895	143.065	0.0699418	0.0680701	4.96611	666.417	605.166	697.27	737.08	10.6013	3.40617	0.010452	0.0574136
hsa-let-7c-5p	2105.1	2033.89	28267.8	29290.5	18788.8	3734.3	2722.94	1868.89	1422.23	-6.60515	-2.72359	0.0105034	0.0574136
hsa-miR-200a-3p	0.144949	0.365895	7.48377	6.33052	20.0592	0	0	1.4521	0.522266	-13.4356	-3.74798	0.0105846	0.0574693
hsa-miR-194-3p	0.144949	0.365895	0	0	3.50549	0	0	0	0	-160.184	-7.32359	0.0107239	0.0578375
hsa-miR-299-5p	6.52272	5.61039	0	0	0.0973747	45.0282	49.5061	16.0476	7.80135	12.1097	3.59809	0.0108866	0.058326
hsa-miR-222-5p	0.289899	0.48786	90.7845	72.5628	229.317	0.708308	0.20542	15.3029	5.28794	-14.5922	-3.86713	0.0112623	0.0599421
hsa-miR-539-5p	2.02929	3.78091	0	0	0.584248	1.41662	4.31381	21.1858	33.4903	11.8368	3.5652	0.0123886	0.0655058
hsa-miR-422a	4.49343	2.0734	5.03581	20.9656	5.25823	1.82136	1.74607	0.148934	0.163208	-8.0885	-3.01587	0.012848	0.0674938
hsa-miR-3944-3p	0.289899	0	0	0	0	0.809495	0.30813	0.707435	1.04453	15.5436	3.95824	0.0132655	0.0683566
hsa-miR-127-3p	16621.2	14099.5	91.0642	84.2028	392.517	59128.3	49459.1	56168.2	52089.3	8.66314	3.11489	0.0132743	0.0683566
hsa-miR-378f	0	0.121965	0.349709	0.272281	2.23962	0	0	0	0	-121.011	-6.919	0.0132914	0.0683566
hsa-miR-133a-3p	0.144949	0	0	0	3.60286	0	0	0	0	-149.562	-7.2246	0.0133502	0.0683566
hsa-miR-9-5p	0.869696	2.0734	0	0	33.3021	0.101187	1.43794	0	0	-19.0107	-4.24874	0.0138128	0.0702804
hsa-miR-411-5p	4988.28	4437.33	16.5762	11.4358	44.1107	12091.8	14240.3	18983.6	18651.7	8.4188	3.07361	0.0145809	0.0737246
hsa-miR-605-5p	0	0	0	0	0	0	0.30813	0	2.61133	55.4673	5.79357	0.0150886	0.075367
hsa-miR-190b-5p	2.75404	2.92716	11.7502	16.0646	14.2167	2.3273	1.12981	0	0.881324	-8.95972	-3.16345	0.0151852	0.075367
hsa-miR-1225-3p	0	0	3.35721	0	0	0	0	0	0	-135.495	-7.0821	0.0150993	0.075367
hsa-miR-6511b-3p	0.724746	0.48786	0	0	0	0.809495	1.74607	4.57971	2.15435	10.4169	3.38085	0.0159059	0.0779873
hsa-miR-140-3p	2.17424	0.975719	26.3681	30.4954	23.1752	0.607121	0.513549	3.09037	4.34134	-7.68932	-2.94286	0.0158963	0.0779873
hsa-miR-3126-3p	0.144949	0	0	0	0	1.11306	1.12981	0.744669	0	21.4841	4.4252	0.0164378	0.0798995
hsa-miR-3074-3p	0	0	0	2.79088	0.0973747	0	0	0	0	-117.695	-6.87891	0.0164935	0.0798995
hsa-miR-181c-5p	115.09	122.697	186.815	462.741	201.858	35.3142	36.2566	49.7811	34.6328	-5.58552	-2.48169	0.0171597	0.0816602
hsa-miR-877-5p	6.37777	7.56183	22.801	31.04	3.79761	0.809495	1.43794	4.65418	0	-8.24842	-3.04412	0.017135	0.0816602
hsa-miR-542-3p	0.289899	0.24393	12.5895	6.05824	7.40048	0.910682	0.513549	0	0.620191	-10.5205	-3.39513	0.0170506	0.0816602
hsa-miR-4467	0	0	0	0	0	0	0	1.07977	1.10982	42.4081	5.40627	0.0176938	0.0837094
hsa-miR-4707-3p	0.144949	0	0	0	0.0973747	0.202374	0.410839	1.04254	1.1751	14.9508	3.90215	0.0179193	0.0842831
hsa-miR-370-5p	1.88434	2.4393	0.0699418	0	0	5.76765	5.64904	8.86156	13.1872	9.62791	3.26722	0.0181961	0.0843594
hsa-miR-142-5p	0	0	0	0	2.92124	0	0	0	0	-117.138	-6.87206	0.0181333	0.0843594
hsa-miR-144-5p	0	0	0	0	3.01861	0	0	0	0	-120.945	-6.91821	0.0182483	0.0843594
hsa-miR-548q	0	0	0	0	0	0	0.10271	0	2.25227	45.0475	5.49337	0.0189036	0.0866182
hsa-miR-141-3p	0	0	2.30808	0	0.389499	0	0	0	0	-110.195	-6.78391	0.0189511	0.0866182
hsa-miR-3085-3p	0.869696	1.82947	0	0	0	0	0	0	0	-106.356	-6.73276	0.0192694	0.0875785
hsa-miR-548ah-3p	0	0	0	0	0	0	0	0.595735	1.46887	40.0838	5.32495	0.0197055	0.0890601
hsa-miR-1843	0.434848	0.609825	0.0699418	0.476491	37.3919	0.303561	0.821679	1.37764	0	-12.3657	-3.62828	0.0205154	0.0922053
hsa-miR-125a-5p	1155.83	1351.62	9398.5	9389.19	11309.7	692.827	791.071	1332.25	2167.57	-5.23372	-2.38784	0.0207278	0.0923326
hsa-miR-4508	0	0	0	0	2.72649	0	0	0	0	-109.523	-6.77509	0.020772	0.0923326
hsa-miR-675-3p	0	0	0	0	0	0	0	0	2.5134	47.9085	5.58221	0.020915	0.0924601
hsa-miR-6823-3p	0	0.24393	0	0	0	0.202374	0.616259	0.632968	1.01189	13.2427	3.72712	0.0211216	0.0928662
hsa-miR-302b-3p	0.289899	0.24393	0	0	0	0.607121	0.821679	1.07977	1.07717	11.3559	3.50537	0.0213114	0.0931943
hsa-miR-3605-3p	6.08787	8.29362	0.0699418	0	0.292124	16.0887	15.3038	47.4354	27.8107	9.0599	3.1795	0.021864	0.0950965
hsa-miR-3151-5p	0	0	0	0	0	0	0	0	2.3502	44.8767	5.48789	0.0221848	0.0959396
hsa-miR-2116-3p	0.579797	0	0	0.0680701	0.0973747	0	0	4.02121	3.2968	12.1031	3.5973	0.022295	0.0959396
hsa-miR-548h-3p	0	0	0	0	0	0	0	2.23401	0	42.6231	5.41357	0.0229671	0.0983088
hsa-miR-3929	0	0	0	0	0	0.101187	0.821679	1.0053	0	36.1535	5.17606	0.0231418	0.0985353
hsa-miR-150-3p	0	0	0	0	2.53174	0	0	0	0	-101.907	-6.67111	0.0236642	0.100232
hsa-miR-3136-3p	0.434848	0	0	0	0.0973747	0.505934	0.30813	1.89891	1.01189	10.1691	3.34612	0.0239835	0.100939
hsa-miR-329-5p	0.724746	0.975719	0	0	0	5.76765	3.38942	1.7872	0.750757	8.79705	3.13702	0.0242054	0.100939
hsa-miR-1306-5p	6.23282	6.46414	36.02	35.7368	98.4458	4.95816	3.0813	7.29775	5.15738	-7.12163	-2.83221	0.0241669	0.100939
hsa-miR-378h	0.579797	0.121965	0.699418	1.15719	1.1685	0.101187	0	0.0744669	0.0979249	-9.72543	-3.28176	0.0245662	0.101918
hsa-miR-5684	0	0	0	0	0	0	0	2.12231	0	40.5483	5.34157	0.0251279	0.103717
hsa-miR-1287-5p	10.2914	7.56183	0	0	0	45.8377	51.7658	36.4515	19.3891	10.746	3.42572	0.0263143	0.107516
hsa-miR-194-5p	34.4979	28.1739	34.0617	149.414	82.6711	14.9757	11.5035	2.82974	8.1604	-7.0487	-2.81736	0.0262017	0.107516
hsa-miR-6511a-3p	0.434848	0.73179	0	0	0	0.708308	0.513549	2.71804	4.01492	8.9544	3.1626	0.026635	0.107739
hsa-miR-212-5p	6.52272	3.65895	1.95837	6.26245	3.40811	13.9638	34.7159	9.49453	32.8048	5.21892	2.38375	0.0265374	0.107739
hsa-miR-124-3p	0	0	0	0	2.33699	0	0	0	0	-94.2899	-6.55903	0.0274038	0.110297
hsa-miR-3960	0	0	0	0	0	0	0	0.856369	0.881324	34.1308	5.093	0.027675	0.110837
hsa-miR-5579-3p	0	0	0	0	0	0.101187	0.513549	1.04254	0	31.481	4.97641	0.0282214	0.111917
hsa-miR-628-3p	0.724746	0.609825	0	0	0.0973747	0.404748	0.616259	2.27124	6.10398	8.55306	3.09644	0.0281376	0.111917
hsa-miR-3124-5p	0	0	0	0	0.0973747	0.303561	0.718969	0	1.01189	15.8697	3.9882	0.0285403	0.112083
hsa-miR-29b-3p	435.863	343.697	1131.38	802.479	1154.47	75.6878	129.928	145.471	181.912	-5.80375	-2.53698	0.0284989	0.112083
hsa-miR-455-3p	111.756	90.2541	0.699418	0.476491	4.96611	310.745	294.366	308.74	278.727	7.16309	2.84058	0.0286992	0.112163
hsa-miR-4788	0	0	0	0	0	0.303561	0.10271	1.2287	0	31.4188	4.97356	0.0290596	0.113025
hsa-miR-7108-5p	0	0.24393	0	0	0	0	0.410839	1.04254	1.53416	14.2427	3.83215	0.0292209	0.113109
hsa-miR-3188	0	0	0	0	0	0.809495	0	0.930836	0	32.7524	5.03353	0.0296476	0.114214
hsa-miR-552-5p	0	0	0	0	0	0	0	1.93614	0	37.0913	5.21301	0.0301785	0.115708
hsa-miR-3944-5p	0.144949	0.121965	0	0	0	0.505934	0.30813	0	1.82793	11.9354	3.57717	0.0309908	0.117157
hsa-miR-337-5p	44.6444	37.9311	0	0.13614	1.26587	63.7477	53.3064	164.348	221.408	7.48583	2.90416	0.0309518	0.117157
hsa-miR-378a-5p	12.1757	11.3427	22.801	14.7712	7.88735	3.74391	4.31381	1.52657	0.979249	-5.39665	-2.43206	0.0308525	0.117157
hsa-miR-132-3p	1.59444	3.04912	0.419651	0.884912	4.86873	14.4697	17.7688	7.52115	6.33247	5.32519	2.41283	0.0311473	0.117201
hsa-miR-6858-3p	0.434848	0.121965	0	0	0	1.72018	2.36233	0.781902	0.0326416	11.3965	3.51052	0.0314853	0.117924
hsa-miR-92a-1-5p	4.63838	4.5127	0	0	1.75274	33.7964	28.656	2.45741	4.73303	7.98583	2.99744	0.0318498	0.118739
hsa-miR-6769b-3p	0.289899	0.365895	0	0	0	0.607121	0.20542	1.97337	1.04453	8.27083	3.04803	0.0329612	0.121489
hsa-miR-193b-3p	166.257	159.286	0.0699418	0.13614	13.9246	399.688	317.168	530.204	771.028	7.42683	2.89275	0.0329321	0.121489
hsa-miR-31-5p	1826.36	1764.71	5037.35	2621.65	5721.25	382.992	383.827	1027.49	1185.67	-4.5557	-2.18767	0.0330377	0.121489
hsa-miR-3664-3p	0	0	0	0	0	0.607121	0.410839	0	0.456983	26.7463	4.74127	0.0335791	0.122205
hsa-miR-887-5p	0	0	0.0699418	0	0	0	0	2.27124	0	19.6827	4.29886	0.0335133	0.122205
hsa-miR-502-3p	2.75404	2.0734	0.0699418	0.20421	17.2353	0.101187	0.410839	1.48934	0	-8.74822	-3.12899	0.0336856	0.122205
hsa-miR-6823-5p	0	0	0	0	0	0	0	0	1.73001	33.3666	5.06033	0.0340216	0.122873
hsa-miR-5697	0.144949	0	0	0	0	0.101187	0	0	2.41548	17.7488	4.14965	0.0343151	0.123382
hsa-miR-708-3p	0	0	0	0	0	0.202374	0.30813	0.930836	0	27.5728	4.78517	0.0345309	0.123608
hsa-miR-4632-3p	0	0	0	0	0	0.404748	0.30813	0.707435	0	26.6169	4.73427	0.0347363	0.123629
hsa-miR-5193	0.144949	0.24393	0	0	0	0.303561	0.410839	0.744669	0.81604	9.872	3.30334	0.034995	0.123629
hsa-miR-1469	0	0	0	1.70175	0	0	0	0	0	-71.1155	-6.15209	0.0349812	0.123629
hsa-miR-33a-5p	154.661	161.116	196.676	130.082	317.636	16.8982	27.5262	46.3184	68.7106	-4.80645	-2.26497	0.0353583	0.124369
hsa-miR-6818-5p	0	0	0	0	0	0.202374	0.30813	0.819136	0	25.404	4.66699	0.0357914	0.124807
hsa-miR-210-3p	1.44949	2.92716	0	0	3.60286	14.7733	14.2767	7.59562	4.73303	6.46993	2.69375	0.0357345	0.124807
hsa-miR-3622a-3p	0.289899	0	0	0	0	0.202374	0	1.52657	0.979249	12.1989	3.60868	0.0366547	0.127269
hsa-miR-1273h-5p	0	0	0	0	0	0	0	1.5638	0	30.1826	4.91565	0.0378105	0.130254
hsa-miR-6766-3p	0.144949	0.73179	0	0	0	0.809495	0.410839	1.71274	2.48076	8.19594	3.03491	0.0378364	0.130254
hsa-miR-20b-5p	0.144949	0.365895	0.489593	0.272281	0.778997	0.202374	0.10271	0	0	-9.7756	-3.28918	0.0384961	0.131963
hsa-miR-3158-5p	0	0	0	0	0	0.505934	0	0	0.946607	27.8176	4.79792	0.0393893	0.13333
hsa-miR-1245a	0	0	0	0	0	0.202374	0.20542	0.819136	0	23.6695	4.56496	0.0392668	0.13333
hsa-miR-548ao-3p	0	0	0	0	0	0.303561	0.20542	0	0.718116	23.6101	4.56133	0.0392921	0.13333
hsa-miR-136-5p	7.97221	2.0734	0	0	0.681623	1.21424	1.33523	22.489	43.2828	7.97817	2.99606	0.0402868	0.134414
hsa-miR-432-3p	2.89899	3.29305	0	0	0	12.9519	10.6818	5.99458	7.18116	7.45459	2.89813	0.0400016	0.134414
hsa-miR-382-5p	204.813	182.216	0.839302	1.02105	2.14224	460.4	362.36	612.08	645.684	6.65124	2.73362	0.0401585	0.134414
hsa-miR-33b-3p	4.49343	2.56126	0.0699418	0	0.194749	6.98189	6.36801	13.1062	9.56399	6.21234	2.63514	0.0405401	0.134414
hsa-miR-216b-5p	1.01465	0.365895	0	0	1.36325	0	0.20542	0	0	-12.3679	-3.62853	0.0404439	0.134414
hsa-miR-193a-3p	23.0469	29.7594	57.4222	59.221	44.5002	7.79139	5.85446	6.06905	12.2732	-5.32932	-2.41395	0.04107	0.135615
hsa-miR-106b-5p	11.0161	9.87916	27.1374	16.8814	27.557	3.54154	6.47072	4.57971	2.87246	-4.28286	-2.09857	0.0413847	0.136099
hsa-miR-641	1.73939	2.0734	0	0	0.0973747	5.3629	4.72465	2.19677	6.75682	6.16827	2.62487	0.0419238	0.137313
hsa-miR-7974	0	0	0	0	0	0.101187	0.10271	1.117	0	25.7674	4.68748	0.0423913	0.137729
hsa-miR-1296-5p	19.4232	18.5387	0	0	0.389499	68.8071	156.53	12.6966	11.5878	8.13421	3.024	0.0423223	0.137729
hsa-let-7d-3p	75.5186	81.7165	953.517	897.301	2016.63	113.633	136.501	163.492	150.511	-5.7072	-2.51278	0.0433504	0.140282
hsa-miR-487b-5p	3.18888	2.80519	0	0	0	11.2317	8.93576	8.37752	6.23455	7.28595	2.86512	0.04384	0.141301
hsa-miR-6764-5p	0	0.121965	0	0	0	0.303561	0.718969	0.670202	0	12.6181	3.65743	0.0445687	0.142537
hsa-miR-2277-3p	0.579797	0	0	0	0	0.505934	0.410839	1.63827	0.848682	8.95216	3.16224	0.0447519	0.142537
hsa-miR-32-5p	36.6722	46.8345	52.6662	69.0231	89.39	1.41662	3.28671	16.755	17.7897	-5.96815	-2.57728	0.044626	0.142537
hsa-miR-3691-3p	0	0	0	0	0	0	0	1.41487	0	27.4217	4.77725	0.0453445	0.143858
hsa-miR-501-5p	0.144949	0	0	0.0680701	0	0	0	0	2.80718	13.5078	3.75572	0.0464595	0.144007
hsa-miR-302a-3p	0.289899	0	0	0	0	0.708308	0.718969	0	1.04453	10.7584	3.42739	0.046446	0.144007
hsa-miR-4787-3p	0	0.365895	0	0	0.194749	0	0.924389	3.61164	0	9.4305	3.23733	0.0460736	0.144007
hsa-miR-31-3p	1735.19	1583.96	731.731	334.224	928.468	280.186	327.131	134.897	165.526	-4.68362	-2.22762	0.045844	0.144007
hsa-miR-192-5p	59.1393	96.1084	68.7528	193.591	118.408	17.5053	25.7802	21.2603	18.0182	-5.20013	-2.37855	0.0461738	0.144007
hsa-miR-142-3p	0.144949	0	0	0	5.93986	0.202374	0.20542	0	0	-12.4234	-3.63498	0.0456339	0.144007
hsa-miR-193b-5p	1.01465	2.56126	0	0	0.0973747	2.63086	2.15691	4.91481	7.50757	5.9266	2.5672	0.0466706	0.144109
hsa-miR-125b-2-3p	1.73939	1.46358	0	0	2.72649	3.03561	2.87588	10.4254	14.5255	6.52198	2.70531	0.0472266	0.144924
hsa-miR-429	3.47878	5.24449	0.209825	0.20421	59.5933	2.42849	3.90297	0.670202	0.620191	-7.24622	-2.85723	0.0472928	0.144924
hsa-miR-129-1-3p	0	0	0	0	0	0.101187	0.30813	0.744669	0	22.2181	4.47366	0.0478454	0.145515
hsa-miR-3064-5p	0.144949	0	2.79767	4.35649	9.05584	0.708308	0.30813	0	0.783399	-7.25833	-2.85964	0.0477615	0.145515
hsa-miR-143-5p	0	0	0	0	0	0	0.30813	0.856369	0	22.5308	4.49383	0.0480386	0.145555
hsa-miR-323a-5p	2.75404	3.04912	0	0.20421	0	7.58902	6.88156	11.2445	6.07134	6.67203	2.73812	0.0485939	0.146688
hsa-miR-654-5p	63.9226	49.5178	0.279767	0.13614	0.778997	146.013	101.375	118.402	178.419	5.93555	2.56938	0.0494023	0.148574
hsa-miR-3158-3p	0.144949	0.365895	0	0	0.0973747	0.303561	0	0.0372334	4.34134	9.36257	3.22691	0.0496477	0.148759
hsa-miR-3129-5p	0	0	0	0	0	0.202374	0	0	1.01189	23.7947	4.57257	0.0501152	0.149606
hsa-miR-1305	0	0	0	0	0	0.101187	0.20542	0.781902	0	21.2192	4.4073	0.0513437	0.15271
hsa-miR-496	56.8201	63.6657	2.51791	0.20421	0.681623	104.627	113.7	157.535	153.611	5.34385	2.41788	0.0515849	0.152865
hsa-miR-99a-3p	0.289899	0.48786	0	0	0	0.505934	0.30813	0.446801	2.61133	6.70251	2.7447	0.0528626	0.15578
hsa-miR-34c-5p	0	0	25.3889	33.6266	34.6654	4.85697	4.00568	1.5638	1.30566	-6.40115	-2.67833	0.0529536	0.15578
hsa-miR-377-5p	10.7262	11.0988	0	0	0.0973747	58.3848	46.8357	10.5743	12.6976	7.32594	2.87301	0.0533911	0.156498
hsa-miR-6881-3p	0	0	0	0	0	0	0	0.409568	0.587549	20.7794	4.37708	0.0540512	0.157486
hsa-miR-6797-3p	0.724746	0.24393	0	0	0	0.404748	0.718969	0.632968	3.39473	7.24046	2.85608	0.0543124	0.157486
hsa-miR-548c-5p	0.579797	0.975719	0	0	0	1.5178	2.97859	1.04254	2.28491	6.58906	2.72007	0.0541637	0.157486
hsa-miR-4458	0	0	0	0	0	0.101187	0	1.04254	0	22.4405	4.48803	0.054714	0.158084
hsa-miR-1909-5p	0	0	0	0	0	0	0	0	1.20774	23.695	4.56651	0.0555348	0.158755
hsa-miR-379-5p	1550.96	1580.06	4.54622	0.748772	4.38186	4907.16	4355.41	2624.4	1970.02	5.5151	2.46339	0.0554773	0.158755
hsa-miR-331-3p	22.0323	22.4415	36.7894	43.5649	31.9389	3.03561	5.54633	6.03182	12.11	-4.63952	-2.21398	0.055493	0.158755
hsa-miR-3192-5p	0	0	0	0	0	0	0.10271	1.0053	0	21.7732	4.44448	0.0562984	0.160371
hsa-miR-378a-3p	1231.05	1183.3	1164.95	1740.08	1025.84	564.623	457.161	140.407	76.7731	-4.09818	-2.03498	0.0569102	0.161545
hsa-miR-500b-3p	0	0	0	0	0	0	0	0	1.1751	23.0915	4.52929	0.0573373	0.162188
hsa-miR-3180	0	0	0	0	0	0.101187	0	0.968069	0	21.0563	4.39618	0.0582296	0.164138
hsa-miR-5189-5p	0	0	0	0	0	0	0	1.19147	0	23.2838	4.54126	0.0592639	0.166474
hsa-miR-6772-3p	0	0	0	0	0	0.101187	0	0	0.913965	20.1994	4.33624	0.0598909	0.167653
hsa-miR-3175	0	0	0	0	0	0	0	1.117	0	21.9056	4.45323	0.0611423	0.170566
hsa-miR-4762-5p	0	0	0	0	0	0	0	0	1.14246	22.4881	4.49109	0.061402	0.170688
hsa-miR-511-5p	0	0	0	0	0	0	0	0	1.14246	22.4881	4.49109	0.0621616	0.170688
hsa-miR-3065-5p	0	0	0	0	0	0	0	0	1.14246	22.4881	4.49109	0.0622591	0.170688
hsa-miR-6780a-5p	0	0	0	0	0	0	0	0	1.14246	22.4881	4.49109	0.0624519	0.170688
hsa-miR-6851-3p	0.434848	0.853755	0	0	0	1.01187	0.513549	2.68081	1.86057	6.24881	2.64358	0.0619803	0.170688
hsa-miR-129-2-3p	0.869696	2.31733	0	2.0421	0	5.3629	9.75743	5.06375	4.83096	5.92604	2.56707	0.0622159	0.170688
hsa-miR-1284	2.60909	2.68323	0	0	0.778997	6.37477	5.85446	9.19666	8.9438	6.31838	2.65955	0.0632209	0.171856
hsa-miR-1185-1-3p	3.18888	2.4393	0	0	0.292124	15.0768	5.75175	6.21798	2.41548	6.26007	2.64618	0.0633042	0.171856
hsa-miR-186-5p	40.4409	40.4924	17.4855	34.3754	24.8305	5.56528	10.1683	6.51585	10.5759	-3.82371	-1.93497	0.0635756	0.172016
hsa-miR-10523-5p	0	0	0	0	0	0	0	0	1.04453	20.6791	4.3701	0.066125	0.178317
hsa-miR-200b-3p	0.579797	0.853755	1.6786	2.92702	8.76372	0.303561	0.20542	0.968069	0.848682	-4.87999	-2.28688	0.0667854	0.1795
hsa-miR-2682-3p	0.724746	1.09768	0	0.0680701	0.486873	0.809495	1.12981	4.02121	4.01492	5.46931	2.45136	0.0674053	0.180566
hsa-miR-154-5p	220.758	196.729	0.139884	0.20421	0.681623	954.901	823.836	156.418	130.991	6.17096	2.6255	0.0677032	0.180765
hsa-miR-6787-3p	0.289899	0.24393	0	0	0	0.607121	0.924389	0.0372334	1.24038	6.97981	2.80319	0.0684226	0.182085
hsa-miR-138-2-3p	0	0	10.9809	7.69193	0	0	0.10271	0	1.5668	-8.74717	-3.12882	0.0699426	0.18552
hsa-miR-376a-5p	0.289899	0.48786	0	0	0	0.404748	0.513549	0.968069	0.881324	6.51743	2.7043	0.0719273	0.189541
hsa-miR-16-2-3p	1.44949	0.73179	0	0	2.33699	0.607121	1.12981	5.62225	13.1872	5.68776	2.50786	0.0719221	0.189541
hsa-miR-758-3p	20.8727	18.4167	0	0	0.194749	86.9195	93.1578	9.97856	15.0478	6.49188	2.69864	0.0729824	0.191077
hsa-miR-548l	1.15959	1.70751	0	0	0	5.05934	4.2111	3.38824	1.10982	6.0689	2.60143	0.0728481	0.191077
hsa-miR-942-5p	6.81262	6.34218	0	0	5.16086	12.2436	12.3252	29.824	25.591	5.46434	2.45005	0.0733613	0.191449
hsa-miR-744-3p	12.1757	13.4161	113.795	73.8561	206.24	20.4398	21.3636	17.0901	14.7214	-4.56147	-2.1895	0.0736306	0.191534
hsa-miR-4488	0	0	0	0	0	0	0	0	0.913965	18.2695	4.19136	0.0741183	0.191571
hsa-miR-155-3p	0.869696	1.21965	0	0	9.25059	0	1.12981	0	0	-8.16952	-3.03025	0.0738953	0.191571
hsa-miR-506-3p	0	0	0	0	0	0	0	0	0.913965	18.2695	4.19136	0.0748034	0.192726
hsa-miR-6827-3p	0.724746	0.24393	0	0	0	0.505934	1.0271	0.632968	1.5668	5.69547	2.50981	0.0752338	0.193219
hsa-miR-197-5p	0.144949	0	0	0	0.0973747	0.505934	0.20542	1.04254	0	8.22834	3.0406	0.0757608	0.193957
hsa-miR-668-3p	2.60909	1.95144	0	0	0	1.31543	1.54065	9.90409	9.3355	6.10043	2.60891	0.0760654	0.194123
hsa-miR-409-3p	512.976	500.91	2.86761	2.0421	5.93986	1379.68	1108.34	699.169	665.465	4.69967	2.23256	0.0774609	0.197062
hsa-miR-4701-5p	0.144949	0	0	0	0	0.101187	0.30813	0.781902	0	9.00369	3.17052	0.0778496	0.197431
hsa-miR-5588-3p	0	0.121965	0	0	0	0.101187	0	0	1.24038	10.2831	3.3622	0.0792811	0.199753
hsa-miR-487b-3p	314.54	316.255	0.419651	0.612631	1.65537	778.734	787.065	517.582	408.412	4.9169	2.29775	0.0792072	0.199753
hsa-miR-221-3p	3246.57	2806.66	1362.33	935.08	2218.39	12862.1	11412.1	2266.51	2879.28	3.47951	1.79888	0.0795063	0.199753
hsa-miR-629-3p	8.11716	6.58611	0	0	0.0973747	24.5884	18.1796	19.0263	5.647	5.70113	2.51125	0.0803342	0.200439
hsa-miR-30d-5p	61.7484	70.6177	12088	15375.2	7373.11	18.5172	29.8886	1996.01	3719.58	-4.85335	-2.27898	0.0805223	0.200439
hsa-miR-101-3p	1.15959	1.58554	1.25895	0.544561	46.1556	0.101187	0.616259	4.69141	1.82793	-5.55536	-2.47388	0.0801189	0.200439
hsa-miR-3146	0	0	0	0	0	0	0	0.893602	0	17.7751	4.15179	0.0815179	0.202294
hsa-miR-30b-5p	90.8832	100.987	231.507	310.604	398.262	65.1644	83.5031	47.2492	68.7759	-3.4239	-1.77564	0.0826042	0.20374
hsa-miR-219a-5p	0	0.121965	1.81849	1.70175	3.70024	0	0	0	0.81604	-6.72145	-2.74877	0.0825426	0.20374
hsa-miR-6877-3p	0	0	0	0	0	0	0	0	0.848682	17.0659	4.09305	0.0831132	0.204372
hsa-miR-675-5p	0.144949	0	0	0	0	0.101187	0.10271	1.04254	0	9.40201	3.23297	0.0848774	0.206204
hsa-miR-130b-5p	73.1994	58.6651	1.74855	1.42947	8.8611	93.1931	90.2819	192.05	124.985	4.35047	2.12117	0.0843129	0.206204
hsa-miR-93-5p	1030.15	779.844	2994.77	3273.9	3341.22	1111.44	813.462	367.084	285.19	-3.54528	-1.8259	0.0843964	0.206204
hsa-miR-887-3p	20.7277	28.2959	0.139884	0.13614	0.194749	0.505934	0.513549	4.28184	1.24038	-5.9957	-2.58393	0.0846454	0.206204
hsa-miR-10397-5p	0	0	0	0	0	0	0	0.856369	0	17.0873	4.09486	0.0854444	0.20696
hsa-miR-548ad-5p	0.724746	1.58554	0	0	0	0	0.10271	6.03182	6.0387	6.56508	2.71481	0.0858067	0.207217
hsa-miR-4667-3p	0.869696	0.73179	0	0	0	0	0.30813	4.95205	2.38284	6.02517	2.591	0.0868784	0.207801
hsa-miR-495-5p	36.3823	30.7352	0	0	0.194749	109.99	132.29	29.7867	37.8643	5.75481	2.52477	0.0867804	0.207801
hsa-miR-579-5p	1.01465	1.09768	0	0	0	2.12492	1.95149	2.86697	1.43623	5.14317	2.36266	0.0867561	0.207801
hsa-miR-561-3p	1.01465	2.19537	0	0	0	0	0.30813	0	0	-8.85552	-3.14658	0.0870761	0.207801
hsa-miR-548ar-3p	0	0.365895	0	0	0	0	0.410839	0.744669	0.913965	7.15913	2.83978	0.0893026	0.212488
hsa-miR-548f-3p	0	0	0	0	0	0	0	0	0.81604	16.4645	4.04129	0.0898598	0.213186
hsa-miR-6726-5p	0	0.121965	0	0	0	0	0	0	1.30566	9.85754	3.30123	0.0905095	0.2141
hsa-miR-190a-3p	0	0	0	0	0	0	0	0	0.81604	16.4645	4.04129	0.0908161	0.214199
hsa-miR-152-5p	0	0	0	0	0	0	0	0.744669	0.0326416	15.8646	3.98774	0.0915358	0.215269
hsa-miR-122-5p	0.724746	0.975719	4.96587	2.24631	6.81623	0.809495	0.30813	1.63827	0.0652832	-4.42597	-2.14599	0.0923029	0.216444
hsa-miR-323a-3p	213.51	221.61	0	0.272281	2.62912	510.791	459.935	556.081	324.197	5.28226	2.40116	0.09391	0.217922
hsa-miR-10a-5p	1953.77	1633.84	23363.2	18264.4	28949.5	2809.66	2912.65	5627.27	5937.15	-3.43221	-1.77914	0.0941315	0.217922
hsa-miR-26b-3p	7.10252	4.5127	31.4039	23.6203	12.2692	1.11306	1.43794	7.93072	7.24644	-3.53204	-1.8205	0.0939019	0.217922
hsa-miR-204-5p	1323.53	1555.17	60.8494	142.335	106.723	259.241	286.15	8.48922	0.81604	-4.59911	-2.20136	0.0942587	0.217922
hsa-miR-363-3p	0	0.365895	0	0	1.65537	0.202374	0	0	0	-8.87358	-3.14952	0.0942801	0.217922
hsa-miR-6824-3p	0.144949	1.34161	0	0	0	0.910682	1.0271	0.670202	3.55794	5.26699	2.39698	0.0956199	0.220389
hsa-miR-574-3p	951.737	799.846	73.9984	79.7782	129.216	2740.14	2516.39	367.606	394.18	3.69762	1.8866	0.0974409	0.223948
hsa-miR-548al	0	0	0	0	0	0	0	0.781902	0	15.7124	3.97383	0.099189	0.226124
hsa-miR-3130-5p	1.73939	0.975719	0	0.0680701	0.0973747	3.64273	1.0271	2.90421	2.7419	4.65687	2.21936	0.0991721	0.226124
hsa-miR-329-3p	11.451	14.3919	0	0.13614	0.194749	23.4754	31.3265	14.8934	25.0688	4.52916	2.17924	0.0992261	0.226124
hsa-miR-1285-5p	0.144949	0.48786	0	0	0.194749	0	0.30813	0.893602	2.25227	5.33052	2.41428	0.0998915	0.226365
hsa-miR-214-3p	186.26	177.825	0.209825	0.340351	0.778997	387.242	291.491	342.697	455.742	5.05322	2.3372	0.0996655	0.226365
hsa-miR-10522-5p	0	0	0	0	0	0	0	0.781902	0	15.7124	3.97383	0.100662	0.226841
hsa-miR-99b-3p	199.885	196.973	242.488	225.857	449.189	113.329	85.0437	68.7702	32.9354	-3.50802	-1.81066	0.100539	0.226841
hsa-miR-656-5p	2.46414	1.21965	0	0	0	6.67833	5.2382	2.60634	0.848682	5.25796	2.3945	0.101605	0.228061
hsa-miR-365a-3p	111.466	140.138	781.949	657.898	713.756	107.46	122.019	123.317	162.653	-3.73298	-1.90033	0.101768	0.228061
hsa-miR-6500-3p	0.289899	0.121965	0	0	0	0	0	0.968069	1.1751	6.74297	2.75339	0.102771	0.229674
hsa-miR-570-5p	0	0	0	0	0	0	0	0.744669	0	15.0252	3.90931	0.103064	0.229694
hsa-miR-4755-5p	0.289899	0.121965	0	0	0	0.101187	0.10271	0.632968	0.881324	6.2735	2.64927	0.10371	0.230499
hsa-miR-665	2.17424	3.90288	0	0	0	1.41662	0.410839	13.6647	11.7183	5.60418	2.4865	0.106689	0.236469
hsa-miR-1304-3p	12.3207	11.2208	0	0	0.389499	32.1774	27.1154	17.9465	12.4691	4.68812	2.22901	0.109026	0.240332
hsa-miR-4775	3.18888	6.70807	0	0	0	0.303561	0.924389	0	0	-6.54263	-2.70987	0.108934	0.240332
hsa-miR-302d-3p	0.144949	0.24393	0	0	0	0.809495	0.821679	0.372334	0	6.21983	2.63687	0.1102	0.24226
hsa-miR-6875-3p	0	0.121965	0	0	0	0	0	0	1.1751	8.94102	3.16044	0.11188	0.242656
hsa-let-7i-3p	91.1731	100.133	30.3547	37.5066	41.7737	19.6303	21.1582	8.82432	15.5374	-3.70093	-1.88789	0.111659	0.242656
hsa-let-7a-3p	101.465	92.0835	341.736	337.9	1942.43	11.8389	27.1154	297.607	217.165	-4.06715	-2.02402	0.11159	0.242656
hsa-miR-625-5p	203.799	230.27	0.0699418	0.20421	0.486873	16.9994	15.7146	11.9147	23.6978	-5.08952	-2.34753	0.111663	0.242656
hsa-miR-4645-3p	1.30454	1.82947	0	0	0	0	0	0.297867	0	-7.25453	-2.85888	0.110985	0.242656
hsa-miR-421	26.8156	33.9063	4.54622	9.39368	4.57661	6.1724	7.70324	1.82444	3.52529	-3.30949	-1.72661	0.114974	0.248701
hsa-miR-224-3p	0.144949	0	0	0	0	0.202374	0	0.0372334	0.685474	7.38698	2.88498	0.115462	0.24909
hsa-miR-1268a	6.95757	7.56183	0	1.15719	0.876372	10.7258	7.70324	17.1646	15.9291	3.91001	1.96717	0.116363	0.250367
hsa-miR-4641	0	0	0	0	0	0	0	0	0.652832	13.4609	3.7507	0.116866	0.250781
hsa-miR-5010-3p	1.15959	1.09768	0	0	0	0.101187	0.20542	4.20738	4.66775	5.14078	2.36199	0.118106	0.252105
hsa-miR-191-3p	1.88434	0.975719	0.489593	0.476491	619.985	7.58902	3.80026	36.0047	45.6983	-5.35841	-2.4218	0.118081	0.252105
hsa-miR-181c-3p	0.579797	0.609825	0.979185	0.340351	4.28449	0	0	0.0372334	1.01189	-4.77149	-2.25444	0.120687	0.256935
hsa-miR-532-3p	7.10252	7.19593	15.8068	8.91719	7.20573	3.64273	2.97859	1.15424	2.57869	-3.68309	-1.88092	0.124718	0.264822
hsa-miR-561-5p	5.36312	6.952	0	0	0	0.809495	0.821679	0	0	-6.10163	-2.6092	0.126179	0.267223
hsa-miR-4670-5p	0	0.121965	0	0	0	0	0	0	1.07717	8.25379	3.04506	0.126746	0.267722
hsa-miR-3129-3p	0.144949	0.121965	0	0	0	0.505934	0.30813	0.484035	0	5.85021	2.54849	0.127504	0.268622
hsa-let-7a-2-3p	61.0236	67.9345	1.6786	3.74386	0.584248	167.161	120.684	33.5846	86.2065	3.77641	1.91701	0.128494	0.269143
hsa-miR-184	0	0.121965	1.74855	0	4.47924	0.809495	0	0	0	-6.45683	-2.69082	0.128749	0.269143
hsa-miR-1973	0	0.853755	0	1.49754	0	0	0.30813	0	0	-6.76871	-2.75888	0.128594	0.269143
hsa-miR-9901	0	0.24393	0	0	0	0	0	0	1.63208	7.28504	2.86494	0.131569	0.273867
hsa-miR-3909	8.69696	7.80576	0	0	0	22.5647	24.0341	6.70202	3.42737	4.29539	2.10279	0.132025	0.273867
hsa-miR-324-5p	10.5813	9.14737	18.7444	34.3074	31.5494	1.72018	1.74607	4.76588	14.3297	-3.66927	-1.8755	0.131793	0.273867
hsa-miR-212-3p	30.2944	36.8334	1.95837	7.76	12.3666	41.3854	36.9755	82.2114	90.2541	3.52147	1.81618	0.13251	0.27417
hsa-miR-204-3p	1.01465	3.78091	0	0	0	0.607121	0	0	0	-6.48076	-2.69616	0.132949	0.274377
hsa-miR-494-3p	3.62373	3.41502	0.0699418	0	0.389499	1.82136	1.74607	10.0903	13.0566	4.48926	2.16648	0.133629	0.275052
hsa-miR-548d-5p	3.76868	2.4393	0	0	0.0973747	4.95816	8.42221	4.43078	2.25227	4.00022	2.00008	0.133956	0.275052
hsa-miR-4804-5p	0.144949	0.365895	0	0	0	0.101187	0.10271	2.08507	0	5.54042	2.47	0.136829	0.279532
hsa-miR-219b-5p	1.73939	1.09768	0	0	0	4.35104	4.00568	0.819136	0.489624	4.28987	2.10093	0.136764	0.279532
hsa-miR-3138	0	0.121965	0	0	0	0	0.30813	0	0.620191	7.24609	2.8572	0.137608	0.280416
hsa-miR-4741	0	0	0	0	0.0973747	0	0	0	0.913965	7.51978	2.91069	0.138332	0.280478
hsa-miR-5586-5p	0	0	0	0	0.0973747	0	0	0	0.913965	7.51978	2.91069	0.138082	0.280478
hsa-miR-25-5p	1.15959	0.73179	34.0617	12.4568	33.789	0.505934	0	10.6115	6.16927	-3.79065	-1.92244	0.138861	0.280847
hsa-miR-185-3p	0	0.24393	0	1.29333	0.194749	0.202374	0.513549	2.53187	2.87246	4.16437	2.0581	0.139548	0.281533
hsa-miR-520c-3p	0	0	0	0	0.0973747	0	0.10271	0.781902	0	7.27983	2.86391	0.140738	0.283226
hsa-miR-151a-3p	193.362	173.19	196.467	141.858	1339.68	100.985	158.995	92.1155	146.822	-3.27845	-1.71301	0.143906	0.288884
hsa-miR-342-3p	62.6181	77.4477	692.634	534.01	1131.88	36.832	32.8671	307.436	196.47	-3.48415	-1.80081	0.144792	0.289943
hsa-miR-1262	0.579797	0.975719	0	0	0.0973747	0.910682	0.821679	4.31908	0	4.60358	2.20276	0.145893	0.290707
hsa-miR-98-5p	2129.74	1733.61	4080.83	4272.69	4101.81	1313.61	1215.88	1459.85	1083.47	-2.5736	-1.36379	0.145844	0.290707
hsa-miR-616-5p	0	0.24393	0	0	0	0	0	0	1.43623	6.45783	2.69105	0.147744	0.293672
hsa-miR-431-5p	132.918	140.138	0.489593	0.272281	0.389499	152.084	98.0879	321.325	324.947	4.08679	2.03097	0.148419	0.294292
hsa-miR-3912-3p	0.144949	0.365895	0	0	0.0973747	0.202374	0	0.781902	1.07717	4.57212	2.19286	0.149527	0.295763
hsa-miR-3117-3p	1.59444	0.853755	0	0	0	0.404748	0.10271	8.97326	0.0326416	4.87216	2.28456	0.150953	0.297408
hsa-miR-487a-5p	60.5888	50.6154	0.209825	0.20421	0.292124	145.406	107.845	56.8927	55.1643	4.08084	2.02887	0.151094	0.297408
hsa-miR-299-3p	8.69696	11.9526	0	0	0.0973747	25.8027	27.0127	8.52646	8.51946	4.20867	2.07336	0.151834	0.29814
hsa-miR-375-3p	2.17424	0.609825	4.40633	3.74386	3.01861	1.31543	1.33523	0.595735	0	-3.57617	-1.83841	0.153586	0.300851
hsa-miR-6808-3p	1.59444	2.31733	0	0	0	8.19614	4.51923	2.01061	0	4.68527	2.22813	0.154116	0.301159
hsa-miR-548at-5p	0.434848	0.24393	0	0	0	0.404748	0.30813	0.856369	0.359058	4.5986	2.20119	0.155372	0.302311
hsa-miR-889-5p	14.7848	13.782	0	0	0	25.6003	24.4449	12.436	27.3863	3.93235	1.97539	0.155453	0.302311
hsa-miR-642a-5p	0	0.975719	0	0	0	1.21424	3.49213	0	0	5.77086	2.52879	0.157443	0.305447
hsa-miR-6770-3p	0.579797	0.365895	0	0	0	0.708308	1.43794	0	1.50151	4.92786	2.30096	0.158158	0.3061
hsa-miR-23c	0.144949	0.24393	0.559535	1.42947	3.21336	0.101187	0.10271	0.409568	0.424341	-4.0019	-2.00068	0.160121	0.309161
hsa-miR-548as-5p	0.144949	0.24393	0	0	0	0.607121	1.23252	0	0	5.45148	2.44665	0.162363	0.311999
hsa-miR-181b-5p	2944.06	3160.48	1749.73	2690.61	2297.07	1232.66	1181.47	901.905	726.505	-2.54166	-1.34577	0.162288	0.311999
hsa-miR-483-5p	0	0	0	0	3.50549	4.85697	2.77317	2.97867	2.15435	4.46422	2.15841	0.163288	0.312294
hsa-miR-503-3p	7.10252	4.02484	0.139884	0.408421	9.83484	17.9101	14.6875	10.9839	13.6768	3.33236	1.73655	0.163227	0.312294
hsa-miR-4659a-3p	1.73939	1.34161	0	0	0.292124	1.82136	2.36233	2.75527	2.44812	3.58872	1.84347	0.163927	0.312776
hsa-miR-135b-3p	0	0	3.49709	0	2.53174	0	0	0.819136	0	-5.65029	-2.49832	0.165477	0.314991
hsa-miR-30d-3p	6.66767	5.61039	9.51209	27.7726	42.1632	5.3629	8.11408	7.26052	4.40662	-2.92589	-1.54887	0.166494	0.316182
hsa-miR-6853-3p	0.434848	0.24393	0	0	0	0.505934	0.410839	1.48934	0	4.61003	2.20478	0.170877	0.323746
hsa-miR-4747-3p	0.434848	0	0	0	0	0.404748	0.616259	0.632968	0	4.95323	2.30837	0.173217	0.327413
hsa-miR-7111-3p	0.289899	0.365895	0	0	0	0.202374	0.30813	0	1.79529	4.51277	2.17401	0.175409	0.330341
hsa-miR-6780b-3p	1.15959	1.21965	0	0	0.194749	1.5178	0.718969	2.15954	2.48076	3.48335	1.80048	0.175991	0.330341
hsa-let-7b-3p	17.3939	19.8803	62.1083	55.4091	451.624	55.5516	53.2037	22.489	20.2378	-3.20414	-1.67994	0.175625	0.330341
hsa-miR-454-5p	0.869696	1.09768	0	0	0	0	0.616259	1.07977	4.70039	4.10486	2.03733	0.178167	0.333651
hsa-let-7f-2-3p	34.208	31.5889	1.46878	3.13123	33.3021	6.27359	15.3038	1.89891	0.0652832	-3.53289	-1.82085	0.179435	0.335249
hsa-miR-136-3p	21.7424	17.0751	0.0699418	0	0.0973747	18.2136	33.997	42.0365	36.1343	4.1824	2.06433	0.180726	0.335338
hsa-miR-6894-3p	0.579797	0.975719	0	0	0.0973747	1.5178	1.0271	0.781902	1.04453	3.53699	1.82252	0.180321	0.335338
hsa-miR-381-5p	3.18888	2.31733	0	0	0	3.64273	2.77317	6.59032	2.25227	3.48846	1.80259	0.180384	0.335338
hsa-miR-100-5p	50907.9	50862.2	1017.09	974.901	2902.06	120134	106921	19745	19529.5	3.12112	1.64206	0.182068	0.337054
hsa-miR-214-5p	38.8464	41.834	0.0699418	0	0	47.3555	45.295	69.1425	100.569	4.06129	2.02194	0.182764	0.337572
hsa-miR-4804-3p	0.579797	0	0	0	0	0	0	2.68081	0	5.65326	2.49908	0.185129	0.338844
hsa-miR-140-5p	127.845	143.797	285.363	306.792	427.864	70.8308	95.931	109.95	97.37	-2.7622	-1.46582	0.184309	0.338844
hsa-miR-26b-5p	323.962	410.046	2229.81	3142.46	3430.9	148.947	214.253	1303.91	1061.57	-2.79602	-1.48337	0.184999	0.338844
hsa-miR-486-3p	0	0	0.0699418	0.13614	4.08974	0.505934	0.20542	0	0	-5.04634	-2.33524	0.184764	0.338844
hsa-miR-4440	0.144949	0.121965	0	0	0	0	0.20542	0.856369	0	4.88477	2.28829	0.188616	0.342558
hsa-miR-1307-3p	155.531	137.576	0.139884	0.272281	5.84248	48.0638	46.014	442.184	327.983	3.60902	1.85161	0.188781	0.342558
hsa-miR-197-3p	132.049	131.6	1.18901	0.816842	2.62912	144.292	139.172	185.534	237.043	3.29017	1.71816	0.188852	0.342558
hsa-miR-450a-1-3p	1.88434	2.68323	1.95837	0.0680701	52.9718	3.74391	6.05988	1.7872	1.40359	-3.67709	-1.87857	0.188849	0.342558
hsa-miR-138-5p	13.3353	7.07397	516.38	513.385	733.523	1161.73	914.939	843.226	1079.2	2.8023	1.48661	0.190302	0.343648
hsa-miR-30e-5p	0.434848	1.09768	57.702	97.9529	45.2792	0	0.616259	17.1646	23.9263	-3.87906	-1.95571	0.190285	0.343648
hsa-miR-548s	0	0	0	0	0.0973747	0	0	0.744669	0	6.19037	2.63003	0.194448	0.348799
hsa-miR-574-5p	320.193	303.937	188.633	186.648	270.215	417.699	426.759	1015.28	809.218	2.62879	1.3944	0.193596	0.348799
hsa-miR-423-5p	146.544	145.382	286.971	195.974	269.144	82.2649	73.3348	64.6372	92.9307	-2.66812	-1.41582	0.194385	0.348799
hsa-miR-1303	1.15959	1.21965	0	0	0.584248	1.11306	2.67046	1.26594	2.3502	3.21732	1.68586	0.196583	0.351849
hsa-miR-937-3p	1.01465	0.365895	0	0	0.194749	0.607121	0.410839	0.744669	2.21963	3.4457	1.7848	0.198454	0.354413
hsa-miR-425-5p	115.525	121.599	1103.82	729.099	1101.7	51.3017	61.6259	359.154	394.572	-2.92745	-1.54964	0.199369	0.355263
hsa-miR-432-5p	118.279	120.989	0.139884	0.0680701	2.43437	265.413	185.905	193.353	25.6237	3.46356	1.79225	0.200521	0.356531
hsa-miR-548b-5p	0	0.24393	0	0	0	0	0.10271	0	0.979249	5.0588	2.3388	0.203811	0.361586
hsa-miR-6740-3p	0.289899	0.24393	0	0	0	0	0.20542	0	1.69736	4.49631	2.16874	0.204834	0.362606
hsa-miR-889-3p	116.974	117.33	0.209825	0.340351	0.778997	121.222	170.19	196.928	139.478	3.33074	1.73584	0.206474	0.36471
hsa-miR-365a-5p	0	0.975719	0	0	0.0973747	1.82136	0.616259	1.26594	0	4.21292	2.07482	0.207214	0.365215
hsa-miR-34b-5p	0	0	0	0	11.7823	0	0	0	1.76265	-5.25326	-2.39321	0.207663	0.365215
hsa-miR-5582-3p	0.869696	0.73179	0	0	0	2.22611	1.12981	1.30317	0	3.64992	1.86787	0.215613	0.378374
hsa-miR-3934-5p	0.144949	0	0	0	0	0	0	0.744669	0	5.62227	2.49115	0.217592	0.379478
hsa-miR-1343-3p	0.869696	0.975719	0	0	0	0.505934	1.12981	1.48934	1.82793	3.52245	1.81658	0.217649	0.379478
hsa-miR-153-3p	0.579797	1.58554	0	0	0.0973747	0.404748	0.616259	4.02121	0.881324	3.34705	1.74289	0.216767	0.379478
hsa-miR-320a-3p	485.29	488.348	159.817	135.732	83.2553	717.111	568.807	908.682	587.549	2.57192	1.36284	0.219735	0.382292
hsa-miR-589-5p	2.75404	2.0734	0	0	0.486873	0.809495	1.0271	7.29775	4.01492	3.13247	1.6473	0.221164	0.383952
hsa-miR-324-3p	0	0	12.7994	8.37263	4.57661	0.202374	0	0.0372334	5.22266	-3.74645	-1.90552	0.223597	0.387345
hsa-miR-6873-3p	0	0.121965	0	0	0	0	0	0	0.685474	5.50697	2.46126	0.224402	0.387908
hsa-miR-1236-3p	0.144949	0.48786	0	0	0	0.202374	0.513549	0	1.24038	3.91538	1.96915	0.226788	0.390365
hsa-miR-744-5p	11.0161	19.6364	221.296	188.963	151.904	21.3504	19.3094	47.2865	81.2776	-2.8015	-1.4862	0.226591	0.390365
hsa-miR-24-1-5p	0.434848	1.46358	7.41383	15.7242	11.1007	0	0.10271	3.94674	4.63511	-3.30305	-1.7238	0.227674	0.391058
hsa-miR-6842-3p	0.289899	0.48786	0	0	0	1.01187	0.410839	0	0.913965	3.80831	1.92915	0.229727	0.3937
hsa-miR-940	3.62373	4.02484	0	0	0	2.42849	0.924389	10.3509	7.47493	3.47325	1.79629	0.230185	0.3937
hsa-miR-30a-3p	549.648	613.24	1232.51	1549.14	2385.39	819.209	869.336	308.107	206.687	-2.2986	-1.20076	0.234405	0.400071
hsa-miR-770-5p	1.59444	1.46358	0	0	0.0973747	1.01187	0.718969	0.856369	5.32058	3.19997	1.67806	0.237131	0.403871
hsa-miR-6763-3p	0	0.365895	0	0	0	0.101187	0.20542	0	0.913965	4.05989	2.02144	0.241075	0.408867
hsa-miR-6734-3p	0.434848	0.121965	0	0	0	0.101187	0.30813	0.186167	0.685474	3.5827	1.84105	0.240636	0.408867
hsa-miR-2277-5p	1.01465	1.46358	0	0	0.0973747	4.04748	1.84878	0	1.24038	3.45398	1.78826	0.242937	0.410304
hsa-miR-7-5p	6787.98	5860.54	238.362	52.3459	19232.2	4183.88	4757.52	171.46	57.0249	-2.80672	-1.48888	0.242856	0.410304
hsa-miR-6752-3p	0.289899	0	0	0	0	0.101187	0	0	0.848682	4.18747	2.06608	0.247713	0.4175
hsa-miR-134-5p	52.4716	54.8842	0.0699418	0.0680701	0.584248	90.5623	77.4432	48.2918	52.8794	3.11347	1.63852	0.249404	0.418605
hsa-miR-92a-3p	9994.54	9136.52	437.066	144.921	11272.5	39847	24242.8	610.144	644.117	2.63607	1.39839	0.248916	0.418605
hsa-miR-636	0.289899	0.365895	0	0	0.194749	0	0.10271	1.0053	1.10982	3.47344	1.79636	0.250471	0.419526
hsa-miR-1288-3p	0.144949	0.24393	0	0	0	0.303561	0	0.893602	0	3.85153	1.94543	0.255106	0.425528
hsa-miR-1307-5p	20.148	16.4653	0	0	0.0973747	1.31543	3.184	3.35101	0.848682	-3.36921	-1.75241	0.255017	0.425528
hsa-miR-431-3p	2.89899	2.0734	0	0	0	5.3629	4.31381	0.670202	2.05642	3.12756	1.64504	0.262118	0.436324
hsa-let-7i-5p	46224.3	40169	27506.6	26841.7	37016.8	23641.3	18716.5	12391	10869.2	-2.1672	-1.11584	0.264922	0.440086
hsa-miR-6729-3p	0.144949	0.365895	0	0	0	0	0.10271	0.521268	0.620191	3.451	1.78701	0.265847	0.440718
hsa-miR-130b-3p	13.3353	10.2451	0.0699418	0	0.486873	13.9638	11.1954	17.6486	13.8074	2.93681	1.55425	0.267374	0.442343
hsa-miR-24-3p	8093.97	9170.06	41813.7	33466.5	26131.6	3839.13	16715.7	8625.53	15939.1	-2.10421	-1.07328	0.268044	0.442547
hsa-miR-592	0.289899	0.48786	0	1.15719	0	0.404748	0.10271	0	0	-3.49391	-1.80484	0.271095	0.446672
hsa-miR-548aq-5p	0.144949	0.609825	0	0	0	0.101187	0.513549	1.48934	0	3.49497	1.80528	0.272885	0.448111
hsa-miR-433-5p	2.89899	1.21965	0	0	0	2.73205	3.59484	1.52657	1.79529	2.95891	1.56507	0.27363	0.448111
hsa-miR-211-5p	2.17424	0.48786	0	0.0680701	5.25823	0.303561	0.513549	1.2287	0	-3.09204	-1.62856	0.273439	0.448111
hsa-miR-6509-3p	0.434848	0.24393	0	0.0680701	0	0	0.410839	0.484035	0.424341	3.17734	1.66782	0.276134	0.451298
hsa-miR-485-3p	70.0105	72.4472	0.139884	0.13614	3.11599	107.663	81.5516	54.0629	84.2807	2.80773	1.4894	0.27818	0.452813
hsa-miR-330-3p	4.34848	3.29305	0.139884	0.13614	11.1981	1.11306	0.410839	1.04254	2.9051	-2.76096	-1.46517	0.278074	0.452813
hsa-miR-376a-3p	913.76	953.4	0.349709	0.340351	2.82387	1663.71	1480.56	563.64	461.03	2.78571	1.47804	0.279398	0.453882
hsa-miR-624-5p	6.23282	4.14681	0	0	0.681623	5.3629	10.8872	5.54778	3.94964	2.91901	1.54548	0.280981	0.455539
hsa-miR-7109-3p	0	0.48786	0	0	0	0	0.10271	0	1.43623	3.80427	1.92762	0.284967	0.460679
hsa-miR-651-5p	4.34848	2.31733	0	0	0	4.45222	7.49782	4.57971	0	3.09622	1.63051	0.28529	0.460679
hsa-miR-409-5p	4.05858	3.53698	0	0	0.292124	2.22611	4.00568	4.20738	6.07134	2.63605	1.39838	0.287623	0.46352
hsa-miR-29a-3p	314.975	512.375	1532.36	1954.57	2289.86	349.499	389.989	1005.12	783.725	-2.08958	-1.06321	0.288424	0.463887
hsa-miR-655-3p	6.08787	8.78148	0	0	0	10.3211	14.9956	5.77118	3.36209	2.89494	1.53354	0.291935	0.468602
hsa-miR-17-3p	0.289899	0	0	0	10.5165	0	0	10.1647	20.3684	3.51526	1.81363	0.294764	0.468814
hsa-miR-548aq-3p	0.144949	0.975719	0	0	0	0.505934	1.54065	0.781902	0.0326416	3.16714	1.66318	0.293397	0.468814
hsa-miR-28-3p	404.553	392.971	0.559535	0.748772	397.678	932.842	922.642	303.304	248.696	2.51507	1.3306	0.294267	0.468814
hsa-miR-484	668.361	686.175	1028.98	1045.35	1349.91	662.976	655.905	248.943	207.34	-2.1542	-1.10715	0.294965	0.468814
hsa-miR-125b-5p	2571.55	3037.66	242.488	186.308	16664.7	3461.6	3898.76	39.7653	111.047	-2.41804	-1.27384	0.292734	0.468814
hsa-miR-381-3p	264.532	264.908	0.0699418	0.13614	1.07112	443.603	414.331	151.838	218.242	2.89231	1.53222	0.296675	0.470608
hsa-miR-6775-3p	0.579797	0	0	0	0	0.708308	1.0271	0	0	3.63768	1.86302	0.297733	0.471362
hsa-miR-7977	135.528	138.43	584.294	361.452	874.132	2285.61	978.311	239.225	261.688	2.24732	1.1682	0.298437	0.471553
hsa-miR-22-3p	26853.6	27535.4	34398.9	29370.9	44202.5	21873.3	22399	7924.8	12499.3	-2.00769	-1.00554	0.301602	0.4747
hsa-miR-4497	2.89899	1.95144	0	0	0	1.01187	0.10271	0	0	-3.544	-1.82538	0.301343	0.4747
hsa-miR-191-5p	4726.22	4338.29	2755.57	4171.13	4183.31	3104.62	2636.46	1265.71	1076.75	-1.99672	-0.997632	0.307028	0.482302
hsa-miR-941	186.115	177.337	0.0699418	0	3.89499	356.987	344.078	79.3817	51.9328	2.83175	1.50169	0.308949	0.483443
hsa-miR-106b-3p	3.91363	3.65895	17.8352	13.4779	24.8305	6.98189	5.2382	8.41476	3.6885	-2.10297	-1.07243	0.308697	0.483443
hsa-miR-942-3p	3.62373	4.8786	0	0	0.681623	4.14866	2.67046	7.67009	4.79832	2.64016	1.40062	0.309638	0.483585
hsa-miR-410-5p	11.0161	12.8063	0	0	0	22.767	23.4178	4.31908	1.69736	2.73697	1.45258	0.310498	0.483995
hsa-miR-6812-3p	0.434848	0.73179	0	0	0	0.202374	0.10271	0	2.57869	3.12801	1.64525	0.311331	0.484359
hsa-miR-1287-3p	3.47878	3.90288	0	0	0	9.10682	8.3195	0.632968	0	3.04755	1.60765	0.312527	0.485286
hsa-miR-6741-3p	0.579797	0.24393	0	0	0.0973747	0.202374	1.12981	0	0.848682	3.03933	1.60375	0.314602	0.487573
hsa-miR-503-5p	11.7409	12.3185	0.0699418	0.0680701	25.5122	32.3798	24.4449	22.5262	19.8461	2.49371	1.31829	0.319693	0.494516
hsa-miR-1276	0	0.24393	0	0	0	0.101187	0	0.632968	0	3.52691	1.81841	0.321029	0.495176
hsa-miR-3173-5p	2.46414	2.0734	0	0	0.0973747	3.8451	3.0813	3.64888	0	2.85307	1.51252	0.321344	0.495176
hsa-miR-146b-5p	2.75404	1.58554	29.8652	29.8147	20.0592	2.12492	3.0813	3.79781	19.7482	-2.3346	-1.22317	0.323955	0.49825
hsa-miR-3157-5p	1.44949	1.46358	0	0	0	3.03561	2.77317	0	1.04453	2.93096	1.55137	0.326878	0.500841
hsa-miR-29a-5p	0.434848	0	26.2282	45.9473	25.1227	0	0.410839	14.8561	12.3385	-2.82882	-1.5002	0.326686	0.500841
hsa-miR-3074-5p	0	0	0	0.20421	0.0973747	0	0	1.0053	0	3.41542	1.77206	0.330718	0.504814
hsa-miR-766-3p	23.7717	22.6855	0	0	0.194749	1.11306	2.67046	2.90421	6.85474	-2.74728	-1.458	0.330217	0.504814
hsa-miR-532-5p	1482.25	1483.58	399.997	325.648	589.798	670.97	658.062	160.253	134.679	-2.10922	-1.07671	0.33321	0.507658
hsa-miR-101-5p	0.289899	0	0	0	0	0	0	0	0.783399	3.41534	1.77203	0.337287	0.512904
hsa-miR-2276-3p	0.289899	0.24393	0	0	0	0	0	0	1.37095	3.231	1.69198	0.338444	0.513698
hsa-miR-4791	0.579797	0.48786	0.839302	0.408421	8.17947	0	0.718969	0.744669	1.82793	-2.50807	-1.32658	0.340473	0.515811
hsa-miR-4725-3p	1.30454	1.09768	0	0	0	0.910682	1.12981	1.07977	1.63208	2.56234	1.35746	0.347546	0.523584
hsa-miR-376c-3p	1958.55	1893.75	0.699418	0.408421	1.55799	2993.21	3147.13	709.967	853.415	2.49797	1.32076	0.346982	0.523584
hsa-miR-450a-5p	46.3838	46.4686	257.246	463.49	470.028	122.537	107.845	121.679	134.092	-2.11252	-1.07897	0.346515	0.523584
hsa-miR-6755-3p	0.434848	0.24393	0	0	0	0	0.30813	0.335101	0.620191	2.80267	1.4868	0.350917	0.524754
hsa-miR-4749-3p	1.01465	0.48786	0	0	0	0.303561	0.513549	0	2.38284	2.72263	1.445	0.349879	0.524754
hsa-miR-376b-3p	495.727	642.145	0.349709	0.20421	2.72649	440.467	522.177	645.032	606.742	2.42565	1.27837	0.349347	0.524754
hsa-miR-671-3p	5.79797	5.48842	11.2606	9.87017	4.38186	22.4635	21.6718	7.52115	12.3712	2.14557	1.10136	0.35089	0.524754
hsa-miR-320b	0.869696	2.68323	7.76354	4.28842	0.292124	2.3273	1.84878	10.9094	13.024	2.19715	1.13563	0.363824	0.54305
hsa-miR-627-5p	0.144949	0.365895	0	0	0	0.202374	0.20542	0.670202	0	2.74025	1.45431	0.365611	0.544693
hsa-miR-3187-3p	6.08787	5.00056	0	0.0680701	0.194749	2.63086	3.69755	6.77648	8.61739	2.40616	1.26673	0.366944	0.544693
hsa-miR-6516-5p	2.02929	2.4393	0	0	0	0	0	0	1.10982	-3.08983	-1.62753	0.366676	0.544693
hsa-miR-323b-5p	4.49343	4.75663	0	0	0	7.08308	7.70324	1.6755	1.37095	2.40855	1.26816	0.369396	0.547329
hsa-miR-1185-2-3p	0	0.609825	0	0	0	0.404748	0.10271	0.893602	0	2.82705	1.4993	0.375642	0.555565
hsa-miR-450b-5p	3.91363	3.78091	0	0	37.9761	1.72018	4.2111	4.05844	4.66775	-2.49048	-1.31642	0.378504	0.558777
hsa-miR-3613-5p	142.05	131.478	0.139884	0.0680701	1.55799	32.0762	71.6915	213.161	182.695	2.26881	1.18194	0.381224	0.560746
hsa-miR-4454	0.144949	0	10.5612	8.57684	13.9246	11.9401	7.08698	26.6964	14.2317	2.24987	1.16984	0.380532	0.560746
hsa-let-7e-3p	394.117	355.772	828.601	794.855	1837.36	668.542	577.64	236.656	224.444	-1.97336	-0.980658	0.382291	0.561294
hsa-miR-4455	202.204	214.17	0	0	0.0973747	784.704	172.655	0.372334	0.0979249	2.87457	1.52335	0.386623	0.563086
hsa-miR-4531	0.724746	0.48786	0	0	0	2.52967	0.20542	0	0	2.76183	1.46563	0.387581	0.563086
hsa-miR-589-3p	4.34848	7.56183	0	0	0	12.446	11.8116	0	1.20774	2.66563	1.41448	0.388023	0.563086
hsa-miR-1185-5p	36.5272	31.5889	0.0699418	0	0.486873	6.1724	8.93576	59.4246	62.8025	2.50083	1.32241	0.384917	0.563086
hsa-miR-6749-3p	0.724746	1.21965	0	0	0	0.404748	0.513549	1.04254	1.46887	2.30583	1.20529	0.386256	0.563086
hsa-miR-2110	4.34848	3.65895	0	0	1.36325	2.63086	0.616259	6.77648	7.05059	2.29224	1.19676	0.385123	0.563086
hsa-miR-103a-2-5p	4.92828	6.34218	7.34389	3.94807	2.33699	2.83323	2.97859	1.48934	3.1336	-1.93128	-0.949556	0.388383	0.563086
hsa-miR-3195	0.579797	0.24393	0	0	0	0.202374	0.30813	1.07977	0	2.54496	1.34764	0.397782	0.573629
hsa-miR-543	30.0045	31.1011	0	0	0.194749	56.4623	32.0455	17.7231	15.5701	2.48339	1.31231	0.397172	0.573629
hsa-miR-1301-3p	8.84191	7.80576	0	0	0.0973747	12.8507	11.1954	3.72334	3.75379	2.35362	1.23488	0.396472	0.573629
hsa-miR-5088-3p	0.289899	0	0	0	0	0	0	0	0.685474	3.03808	1.60316	0.400082	0.575023
hsa-miR-186-3p	0	0	0	0	5.06348	0	0	0	1.27302	-3.11556	-1.63949	0.40017	0.575023
hsa-miR-21-5p	29791.4	28496.7	558663	192611	722287	3904.4	8197.37	257457	318878	-2.0826	-1.05839	0.402677	0.576576
hsa-miR-135a-5p	1.15959	0.853755	0	0.884912	0	0	0.410839	0.484035	0	-2.55076	-1.35093	0.402191	0.576576
hsa-miR-222-3p	3156.27	2823.49	2839.15	1282.37	4455.28	481.953	398.822	2857.67	2935.49	-1.74482	-0.803076	0.405964	0.580256
hsa-let-7g-3p	0.434848	0.48786	3.49709	14.2947	10.2243	0.202374	0	3.12761	7.08323	-2.21283	-1.14589	0.41362	0.590156
hsa-miR-1180-3p	340.196	276.129	0.76936	0.748772	18.0143	418.61	319.53	157.237	185.829	2.12555	1.08784	0.415382	0.591627
hsa-miR-487a-3p	65.0822	65.4952	0	0	0.292124	100.479	93.0551	28.4836	22.7186	2.33732	1.22485	0.41917	0.594928
hsa-miR-34c-3p	0	0.24393	0.419651	0.612631	272.357	28.9394	27.5262	13.2179	16.2229	-2.54858	-1.34969	0.418997	0.594928
hsa-miR-545-5p	0.289899	0	0	0	0	0	0	0	0.652832	2.91225	1.54213	0.42425	0.60011
hsa-miR-5701	19.2783	15.1237	0	0	0	49.7839	23.8287	0	0	2.67189	1.41786	0.424305	0.60011
hsa-let-7e-5p	3627.65	3057.54	5134.57	5049.1	1026.91	3436.41	2347.13	1974.08	910.048	-1.65178	-0.724019	0.439045	0.619873
hsa-miR-1908-5p	2.75404	4.5127	0	0	0.486873	5.3629	4.62194	0.632968	2.64397	2.14004	1.09764	0.440262	0.620509
hsa-miR-501-3p	3.18888	3.04912	0	2.31438	0.486873	0.303561	1.54065	0	1.5668	-2.11454	-1.08035	0.443752	0.624339
hsa-miR-576-5p	60.4439	42.9317	0.0699418	0	1.65537	34.5047	46.5276	52.0151	45.2739	2.1213	1.08495	0.446172	0.625569
hsa-miR-125a-3p	23.0469	30.0034	50.0783	39.3445	45.3766	22.767	20.6447	19.1752	14.5255	-1.96378	-0.973635	0.445565	0.625569
hsa-miR-576-3p	0.434848	0.48786	0	0	0	0.404748	0.616259	0.632968	0	2.28996	1.19532	0.447577	0.626453
hsa-miR-154-3p	53.6312	60.7385	0	0	0.0973747	74.5747	79.6001	18.7657	28.9205	2.20404	1.14015	0.448868	0.627175
hsa-miR-1249-5p	0	0	0	0	1.36325	0	0	1.04254	1.69736	2.44173	1.2879	0.452815	0.629577
hsa-miR-6889-3p	0.724746	1.09768	0	0	0	0.607121	0.513549	0.670202	1.20774	2.16804	1.11639	0.452537	0.629577
hsa-miR-377-3p	41.3105	56.7137	0	0.0680701	1.1685	21.1481	108.564	13.5157	26.3744	2.13561	1.09465	0.452922	0.629577
hsa-let-7a-5p	37658.5	32733.7	60.4297	72.5628	17791	92605.7	57043.5	76.3285	86.3371	2.12039	1.08433	0.45535	0.631867
hsa-miR-374a-3p	43.7747	37.5652	0.0699418	0	0.0973747	3.03561	5.64904	13.8136	7.86663	-2.14462	-1.10072	0.460261	0.637588
hsa-miR-433-3p	31.454	35.4918	0	0	0.194749	44.5222	37.5918	14.2976	23.2408	2.22744	1.15539	0.46221	0.639193
hsa-miR-4796-5p	0.144949	0.121965	0	0	0.0973747	0	0	0.707435	0	2.47858	1.30952	0.466553	0.644098
hsa-miR-6878-3p	0.289899	0.48786	0	0	0	0.404748	1.12981	0	0	2.36156	1.23974	0.469046	0.646243
hsa-miR-3661	0.869696	1.82947	0	0	0	0.910682	0.10271	2.19677	1.30566	2.12915	1.09028	0.470102	0.646243
hsa-miR-10a-3p	5.94292	6.58611	89.4556	69.7719	94.7456	17.6065	17.9742	42.9674	36.3954	-1.85468	-0.891173	0.470625	0.646243
hsa-miR-4662a-5p	6.52272	5.97628	0	0	0	0.708308	1.33523	1.71274	0.979249	-2.09804	-1.06904	0.471302	0.646243
hsa-miR-10527-5p	2.31919	3.41502	2.58785	3.06316	2.62912	1.61899	1.0271	1.52657	1.79529	-1.78431	-0.835363	0.473198	0.647745
hsa-miR-92b-5p	0	0.48786	0	0	2.33699	0	0	1.7872	3.32945	2.23975	1.16334	0.475287	0.648332
hsa-miR-629-5p	1.88434	2.4393	0	0	0	1.11306	0.513549	0.670202	4.76568	2.06436	1.04569	0.476833	0.648332
hsa-miR-671-5p	4.78333	3.41502	27.9068	20.7614	5.55036	2.42849	1.84878	62.1426	30.2914	1.9345	0.95196	0.475702	0.648332
hsa-miR-181d-3p	0	0	0	0	1.85012	0.607121	0	0	0	-2.55954	-1.35589	0.476108	0.648332
hsa-miR-19a-3p	1.59444	2.0734	0	0	1.36325	0.607121	1.23252	0.0744669	0.0326416	-2.11977	-1.08391	0.481865	0.654076
hsa-miR-6879-3p	0.434848	0.48786	0	0	0	0	0.20542	0	1.43623	2.28152	1.18999	0.48391	0.655751
hsa-miR-10395-3p	2.89899	2.0734	0	2.24631	0	4.04748	2.15691	4.35631	0.750757	1.95715	0.968751	0.489732	0.661324
hsa-miR-1275	3.33383	2.0734	0	0	0.194749	3.33917	0.718969	2.86697	1.69736	1.94554	0.960168	0.490319	0.661324
hsa-miR-664b-3p	10.1465	10.489	0	0	0.0973747	2.83323	2.56775	0.819136	1.99114	-2.01866	-1.0134	0.490475	0.661324
hsa-miR-6885-3p	0.724746	0.73179	0	0	0	0.202374	1.0271	1.19147	0	2.10293	1.0724	0.494759	0.663781
hsa-miR-1271-5p	53.0514	51.1033	0.0699418	0	0	45.3317	50.4305	37.643	37.8316	2.05366	1.03819	0.494273	0.663781
hsa-miR-24-2-5p	0.869696	0.73179	1.74855	1.63368	490.379	0.101187	0.718969	63.8553	118.293	-2.16554	-1.11473	0.493574	0.663781
hsa-miR-6716-3p	0.579797	0.365895	0	0	0	0.101187	0.10271	0.372334	0.750757	2.0405	1.02892	0.498285	0.667405
hsa-miR-107	0.869696	1.46358	0	4.83298	3.21336	6.88071	3.59484	2.45741	2.05642	1.77855	0.8307	0.499593	0.668051
hsa-miR-412-5p	102.479	95.3766	0	0	0.194749	120.514	124.895	44.3823	31.1727	2.0256	1.01835	0.505272	0.67453
hsa-miR-6738-3p	1.01465	0.48786	0	0	0	0	0	0.484035	0	-2.23322	-1.15912	0.506234	0.6747
hsa-miR-23a-5p	1.15959	3.29305	7.06412	7.01122	1.85012	1.92255	0.718969	2.68081	4.30869	-1.68385	-0.751767	0.508482	0.676582
hsa-miR-3135b	119.148	90.1321	0	0	0.584248	114.442	94.4931	56.8927	68.58	1.99177	0.994049	0.511442	0.679403
hsa-miR-7-1-3p	77.258	72.8131	34.5513	16.6091	58.6196	112.317	114.111	77.8923	45.7962	1.68492	0.75268	0.51298	0.680329
hsa-miR-33b-5p	0.869696	0.48786	0.0699418	0	0.0973747	0	0.10271	0	0.424341	-2.01901	-1.01365	0.514876	0.681726
hsa-let-7c-3p	8.26211	8.17165	0	0	0.0973747	4.04748	5.64904	3.16484	12.7955	1.94379	0.958874	0.519035	0.685608
hsa-miR-1260a	1236.13	964.621	8.46296	6.6028	2893	4978.19	2708.15	14.7072	18.0182	1.88864	0.917349	0.519503	0.685608
hsa-miR-6789-3p	2.17424	2.19537	0	0	0	2.22611	1.43794	2.19677	0.652832	1.87824	0.90938	0.520788	0.686185
hsa-miR-181d-5p	80.8817	87.9367	142.052	206.116	220.846	125.573	138.658	65.3819	46.8407	-1.56984	-0.650618	0.524061	0.689374
hsa-miR-550a-5p	2.46414	2.92716	0	0	0.584248	1.61899	2.0542	1.6755	3.32945	1.83824	0.878324	0.526094	0.690926
hsa-miR-218-1-3p	0.144949	1.46358	0	0	0	0.607121	0.821679	0	1.1751	2.01623	1.01166	0.529605	0.69441
hsa-miR-1304-5p	0.724746	0.73179	0	0	0	0.708308	0.20542	1.3404	0	1.97117	0.979051	0.531365	0.694466
hsa-miR-3615	1.30454	1.46358	0	0.13614	2.04487	0.607121	0.20542	0.930836	0.391699	-1.79816	-0.846525	0.530778	0.694466
hsa-miR-155-5p	1538.35	1593.47	2.79767	4.15228	597.686	1281.03	900.971	1305.74	1678.73	1.72841	0.789449	0.533721	0.69642
hsa-miR-1-3p	4.63838	1.46358	0.139884	1.22526	5.45298	1.5178	1.0271	2.64357	0.783399	-1.71142	-0.77519	0.535895	0.69813
hsa-miR-6868-3p	0.869696	1.95144	0	0	0	0.910682	0.20542	0	0	-2.07699	-1.05449	0.539229	0.701344
hsa-miR-362-5p	92.3327	93.1812	0	0	4.86873	27.0169	28.7588	16.4572	7.89927	-1.90073	-0.926554	0.545038	0.707762
hsa-miR-6803-3p	1.44949	2.31733	0	0	0.194749	2.63086	0.924389	0.744669	1.37095	1.80734	0.853867	0.548443	0.709904
hsa-miR-320d	0.869696	0.365895	0.279767	2.58667	0.0973747	0.404748	1.0271	2.34571	1.99114	1.69551	0.761718	0.547776	0.709904
hsa-miR-23b-3p	381.217	399.801	652.627	1697.4	1643.98	891.355	998.545	295	276.768	-1.55198	-0.634113	0.552058	0.713443
hsa-let-7d-5p	3580.68	3357.94	9135.66	8411.5	5002.92	6709.4	4814.32	2547.1	1662.67	-1.49945	-0.584437	0.553045	0.713578
hsa-miR-26a-2-3p	6.23282	3.29305	0	0	5.06348	0.505934	0.616259	9.82963	10.38	1.83283	0.874073	0.558938	0.718888
hsa-miR-23a-3p	10010.3	9384.35	7854.68	9884.4	14733.8	11028	10261.8	3713.63	3054.24	-1.47891	-0.564531	0.558158	0.718888
hsa-miR-130a-5p	2.31919	1.21965	3.0075	2.31438	8.27685	1.21424	2.46504	2.30847	2.38284	-1.63447	-0.708822	0.564785	0.725256
hsa-miR-193a-5p	114.51	110.012	0.0699418	0.0680701	22.2014	115.252	126.539	46.095	54.8379	1.73541	0.795273	0.566158	0.725866
hsa-miR-491-5p	15.2197	16.8312	0	3.81193	4.38186	6.77952	9.14118	0	2.18699	-1.78125	-0.832889	0.567815	0.726839
hsa-miR-505-3p	33.9181	35.2479	0.0699418	0.13614	0.973747	2.52967	2.56775	43.9727	52.6836	1.80942	0.855525	0.571325	0.730177
hsa-miR-584-5p	45.5141	26.8323	0	0	0.292124	38.1475	35.4349	9.60623	21.8046	1.80676	0.853408	0.57785	0.735152
hsa-miR-410-3p	414.41	414.437	0	0.13614	1.55799	558.147	423.575	103.099	105.661	1.79168	0.841317	0.577944	0.735152
hsa-miR-130a-3p	19.1333	25.3687	217.309	138.727	157.357	48.6709	46.9384	78.3764	114.213	-1.54872	-0.631079	0.576222	0.735152
hsa-miR-6513-5p	0.144949	1.70751	0	0	0	0.404748	0.410839	0	0	-1.90135	-0.927021	0.587475	0.746102
hsa-miR-345-5p	191.768	171.239	0.279767	0.20421	65.0463	127.597	99.3204	142.418	194.74	1.64549	0.718517	0.589725	0.747786
hsa-miR-4484	0.144949	0.48786	0	0	0	0.101187	0	0.819136	0	1.88097	0.911476	0.591232	0.748523
hsa-miR-99a-5p	6191.22	5511.96	12.0999	12.3888	8.66635	5687.82	6222.47	1661.69	1861	1.64372	0.716961	0.593939	0.749819
hsa-miR-15b-5p	800.7	613.484	342.295	167.248	501.869	1369.97	1249.67	142.753	149.76	1.50068	0.585619	0.595035	0.749819
hsa-miR-185-5p	414.41	401.631	86.3781	107.347	53.5561	253.777	214.869	54.0629	22.0657	-1.56172	-0.643138	0.59449	0.749819
hsa-miR-6736-3p	0.144949	0.609825	0	0	0	0.202374	0	0	0.881324	1.8458	0.884248	0.600874	0.755999
hsa-miR-3682-5p	0.434848	0.121965	0	0	0	0	0	0	0.783399	1.87934	0.910226	0.603384	0.756802
hsa-miR-6514-3p	1.44949	2.4393	0	0	0	2.63086	1.74607	1.19147	0	1.78245	0.833862	0.602667	0.756802
hsa-miR-1226-3p	36.9621	34.2721	0	0	0.0973747	41.3854	35.743	11.9147	10.3148	1.74081	0.799763	0.605998	0.758904
hsa-miR-93-3p	3.91363	2.56126	4.47628	3.06316	4.77136	2.93442	3.28671	1.30317	3.10095	-1.45349	-0.539521	0.6075	0.759609
hsa-miR-181a-5p	26976.9	24913	0	1.42947	10117.5	12720.9	15275.4	4.61695	2.97039	-1.77144	-0.824921	0.616796	0.770043
hsa-miR-361-3p	0.869696	1.34161	0	0	7.01098	0.303561	0.718969	1.2287	2.21963	-1.63656	-0.710668	0.61878	0.77133
hsa-let-7f-1-3p	196.261	199.657	719.212	478.941	1550.2	334.423	333.602	623.846	472.096	-1.426	-0.511977	0.623037	0.775441
hsa-miR-6793-3p	0.869696	0.609825	0	0	0.0973747	0.303561	0.718969	0	1.07717	1.71185	0.775555	0.624177	0.775666
hsa-miR-27a-5p	222.497	221.366	151.284	115.583	266.125	225.546	207.474	33.808	67.4049	-1.46352	-0.549444	0.62611	0.776876
hsa-miR-548t-5p	0.869696	0.609825	0	0	0	0	0.924389	1.04254	0.0326416	1.7173	0.780138	0.632304	0.778943
hsa-miR-495-3p	37.3969	54.6403	0.209825	0.13614	1.75274	25.3979	24.7531	25.5421	45.3066	1.60749	0.684807	0.630118	0.778943
hsa-miR-34a-5p	39281.3	33854.2	14405.6	19339.9	25378.3	29123.9	26928.9	11795.4	8095.15	-1.39324	-0.478448	0.632461	0.778943
hsa-miR-23b-5p	3.18888	2.68323	29.2357	23.4161	49.9532	6.1724	7.90866	17.0529	27.8759	-1.46988	-0.555696	0.63259	0.778943
hsa-miR-1277-3p	13.4803	10.7329	0	0	0.194749	0.303561	0.410839	5.65948	5.35323	-1.6564	-0.728049	0.632293	0.778943
hsa-miR-18a-5p	37.9767	31.5889	24.4097	7.07929	15.9694	19.8326	20.2338	16.5689	7.89927	-1.45125	-0.537291	0.633713	0.779139
hsa-miR-548e-3p	0.724746	1.34161	0	0.0680701	0	0.202374	0	0.0372334	2.54605	1.66283	0.733637	0.639624	0.784405
hsa-miR-15b-3p	12.4656	14.2699	73.6487	60.3101	113.441	13.3567	16.9471	68.0627	49.7458	-1.48006	-0.565653	0.639935	0.784405
hsa-miR-4742-3p	0.434848	0	0	0	0	0	0	0	0.587549	1.81849	0.862741	0.643038	0.787017
hsa-miR-542-5p	149.298	127.941	256.826	414.751	265.541	549.85	567.164	171.646	126.715	1.45634	0.542344	0.644481	0.78759
hsa-miR-570-3p	0.579797	1.34161	0	0	0	0.607121	1.0271	0.893602	0	1.64332	0.71661	0.645973	0.788223
hsa-miR-6737-3p	0.144949	0.853755	0	0	0	0.505934	0.924389	0	0	1.7093	0.773403	0.647845	0.789317
hsa-miR-3940-3p	0.434848	0.48786	0	0	0	0.607121	0.513549	0.0744669	0.0326416	1.62808	0.703173	0.6533	0.789997
hsa-miR-6833-3p	0.579797	1.46358	0	0	0	0.303561	0.924389	0.484035	0.848682	1.61066	0.68765	0.652821	0.789997
hsa-miR-374b-5p	73.7792	91.8396	38.2582	23.9607	29.3098	37.8439	39.646	35.7441	29.6059	-1.43884	-0.524904	0.653098	0.789997
hsa-miR-151b	29.7146	24.271	3.91674	15.52	10.4191	20.7433	16.3309	5.84565	3.42737	-1.45076	-0.536805	0.655119	0.789997
hsa-miR-125b-1-3p	68.561	98.7916	563.731	508.62	794.48	222.712	227.913	325.569	340.55	-1.45729	-0.54329	0.653968	0.789997
hsa-miR-1246	0.144949	1.82947	0	0	7.3031	0.202374	0	2.79251	1.53416	-1.62738	-0.702548	0.650366	0.789997
hsa-miR-628-5p	1.88434	2.4393	0	0	0	0.101187	0.410839	1.52657	0	-1.66723	-0.737452	0.655238	0.789997
hsa-miR-152-3p	7.24746	6.70807	29.0259	91.214	31.8415	8.80326	10.7845	64.6745	110.165	1.4632	0.54913	0.661765	0.796679
hsa-miR-652-5p	1.88434	1.46358	0	0	23.662	2.3273	3.0813	5.39885	3.19888	-1.54253	-0.625296	0.664192	0.798412
hsa-miR-1261	0.144949	0	15.0375	13.3417	44.695	1.5178	0.718969	14.6327	20.8254	-1.55297	-0.635035	0.66581	0.79917
hsa-miR-4479	3.04394	2.80519	0	0	0	1.82136	1.0271	0	0	-1.65752	-0.72903	0.667535	0.800053
hsa-miR-148b-3p	15.0747	10.489	39.7969	36.2133	22.4936	4.24985	9.65472	28.074	27.1578	-1.43328	-0.519323	0.669585	0.801323
hsa-miR-1260b	16.3793	15.3676	164.993	297.807	227.175	28.13	19.823	178.869	183.772	-1.40609	-0.491685	0.670813	0.801606
hsa-miR-21-3p	174.084	182.947	0	0.0680701	76.0496	79.6341	74.7728	34.925	38.5171	-1.52086	-0.604888	0.673074	0.803122
hsa-miR-6514-5p	0.434848	0.24393	0	0	0	0	0	0.856369	0	1.6601	0.731266	0.676331	0.80582
hsa-miR-424-5p	438.472	381.14	234.375	467.982	3537.91	508.464	1025.35	794.189	650.939	-1.35885	-0.44239	0.678208	0.806868
hsa-miR-6732-3p	0.434848	0.365895	0	0	0	0.202374	0.10271	0	0.620191	1.56705	0.648053	0.684577	0.810868
hsa-miR-660-5p	26.6707	31.467	0	0.0680701	2.72649	5.66647	5.54633	31.7229	28.3656	1.46411	0.550025	0.683736	0.810868
hsa-miR-27b-5p	13.3353	13.4161	21.5421	11.9803	20.6434	18.416	15.3038	20.255	35.8405	1.39048	0.475584	0.683051	0.810868
hsa-miR-26a-1-3p	4.92828	2.56126	0	0	0	5.05934	3.69755	0.595735	0	1.55632	0.638141	0.690292	0.815563
hsa-miR-221-5p	14.7848	16.2213	6.43465	1.56561	5.55036	2.52967	2.77317	8.71262	12.2406	-1.34463	-0.427213	0.690557	0.815563
hsa-miR-1913	0.724746	0.48786	0	0	0	0.910682	0.10271	0.484035	0	1.55851	0.640165	0.691674	0.815691
hsa-miR-619-5p	2.02929	1.58554	0	0	0	1.5178	0.718969	0.670202	1.27302	1.46771	0.553566	0.697282	0.818468
hsa-miR-25-3p	690.538	578.602	467.701	418.904	788.54	1438.68	1268.77	273.964	161.543	1.33424	0.416015	0.698076	0.818468
hsa-miR-16-5p	2077.99	2165.49	5463.57	3792.26	6279.4	2931.89	2764.33	2317.63	4119.01	-1.30416	-0.383117	0.696438	0.818468
hsa-miR-590-5p	2.89899	3.78091	0	0	0.0973747	0.303561	0.410839	1.30317	1.53416	-1.49556	-0.580682	0.69599	0.818468
hsa-miR-331-5p	1.01465	0.365895	5.03581	2.79088	0	0.809495	0.718969	1.82444	1.86057	-1.41814	-0.504005	0.699119	0.818505
hsa-miR-6819-3p	5.21817	4.26877	0	0	0.0973747	2.02374	1.43794	2.53187	5.12473	1.45986	0.545831	0.702512	0.820771
hsa-miR-20a-5p	60.8787	54.1524	79.8736	34.1712	104.97	88.0326	84.3248	90.6262	92.2779	1.32942	0.410793	0.705112	0.820771
hsa-miR-10526-3p	3.47878	4.26877	0	0	0	0.910682	1.23252	0.819136	1.20774	-1.47692	-0.562591	0.70447	0.820771
hsa-miR-548ay-5p	2.89899	1.70751	0	0	0	0.607121	1.74607	0	0	-1.58313	-0.66278	0.703987	0.820771
hsa-miR-19b-3p	148.283	128.673	15.8768	6.05824	89.0005	172.726	226.064	15.3774	7.9972	1.36028	0.443903	0.717825	0.833171
hsa-miR-34a-3p	0.579797	0.975719	0	1.02105	1.55799	0.607121	0.410839	1.30317	0	-1.42578	-0.511751	0.716847	0.833171
hsa-miR-1292-5p	1.73939	1.70751	0	0	0	1.31543	1.23252	0.632968	0.685474	1.41578	0.501598	0.722064	0.836077
hsa-miR-33a-3p	0	0	1.6786	0	0	0.101187	0.821679	0	0	-1.56905	-0.649894	0.722395	0.836077
hsa-miR-579-3p	1.44949	0.609825	0	0	0	0.708308	0.410839	0	0	-1.50898	-0.593576	0.726006	0.839055
hsa-miR-6748-3p	1.59444	1.46358	0	0	0	0.607121	0.410839	0.632968	0	-1.4731	-0.558857	0.728664	0.840926
hsa-miR-500a-5p	2.75404	1.34161	0	0	0	0.303561	0.718969	0	1.14246	-1.49384	-0.579024	0.72984	0.841084
hsa-miR-7706	4.05858	7.19593	0	0	0.194749	1.61899	1.64336	1.15424	2.08906	-1.4016	-0.487074	0.733029	0.843557
hsa-miR-12136	17.5389	34.882	0	0	0	25.8027	26.191	7.52115	0.913965	1.44013	0.526197	0.742987	0.852252
hsa-miR-17-5p	30.5843	31.8328	54.9743	31.993	46.7398	48.165	55.2579	46.4301	54.283	1.29666	0.374798	0.743745	0.852252
hsa-miR-181a-3p	707.353	503.471	215.001	176.642	308.775	662.673	672.852	342.845	255.551	1.26488	0.339001	0.74319	0.852252
hsa-miR-1255a	0.869696	1.21965	0	0	0	1.31543	0.410839	0	0.652832	1.42194	0.507856	0.747006	0.853571
hsa-miR-188-5p	2.60909	5.48842	2.86761	4.28842	0	1.72018	0.718969	3.05314	3.65586	-1.32339	-0.404233	0.746538	0.853571
hsa-miR-483-3p	0	0	0.0699418	0.13614	50.4401	3.44035	4.93007	31.2016	17.2021	1.40042	0.485864	0.761355	0.865576
hsa-miR-1227-3p	14.205	12.4404	0.0699418	0	0.194749	8.09495	8.42221	4.98928	7.14851	1.33241	0.414038	0.761651	0.865576
hsa-miR-425-3p	11.8858	13.1722	55.4639	77.7361	47.5188	77.7115	71.0752	39.5047	23.9589	1.28662	0.363584	0.761778	0.865576
hsa-miR-27a-3p	30957.3	30204.6	12802.4	12116.1	26728.8	28093.3	28870.1	8783.26	7933.87	-1.22485	-0.292605	0.761793	0.865576
hsa-miR-6850-5p	0.289899	0.609825	0	0	0	0	0	1.0053	0	1.43954	0.525605	0.764777	0.867749
hsa-miR-6747-3p	4.49343	3.65895	0	0	0	2.42849	2.46504	0.595735	3.32945	1.35668	0.440085	0.768141	0.870345
hsa-miR-1537-3p	3.47878	1.58554	0	0	0	0.505934	1.33523	0	3.59058	1.34907	0.43197	0.783424	0.878819
hsa-miR-3679-5p	1.01465	1.95144	0	0	0	0.607121	0.10271	2.45741	0	1.34679	0.42953	0.784311	0.878819
hsa-miR-339-5p	14.6399	12.1965	16.1566	13.8863	9.34797	18.2136	39.3379	2.45741	7.01795	1.25952	0.332874	0.780844	0.878819
hsa-let-7b-5p	5623.31	5493.18	16617	18896.6	13080.4	15141.4	11279.1	7201.88	5927.82	-1.20781	-0.27239	0.780518	0.878819
hsa-miR-18a-3p	6.95757	6.22021	8.32308	4.76491	13.243	2.83323	3.69755	11.4307	7.34436	-1.23437	-0.303779	0.783501	0.878819
hsa-miR-28-5p	215.829	252.589	167.091	111.567	187.154	143.989	270.024	93.6049	92.4411	-1.24608	-0.317396	0.783919	0.878819
hsa-miR-590-3p	225.831	212.585	0	0.0680701	3.50549	11.9401	30.9157	91.3336	132.558	-1.32535	-0.406378	0.7805	0.878819
hsa-miR-539-3p	1.01465	3.78091	0	0	0	0.101187	0.924389	0.372334	1.43623	-1.3369	-0.418889	0.781753	0.878819
hsa-miR-6515-3p	0.869696	0.975719	0	0	0	0.708308	0.20542	1.04254	0	1.34527	0.4279	0.790362	0.883221
hsa-miR-26a-5p	23291	19129.2	7.34389	6.73894	12834.6	28845.6	29529.9	5.80842	6.49568	1.32054	0.401127	0.792606	0.883221
hsa-miR-128-1-5p	1.59444	2.0734	0.76936	0.13614	7.20573	3.33917	3.90297	0.148934	0.0326416	-1.28538	-0.362195	0.792335	0.883221
hsa-miR-4677-5p	1.15959	1.95144	0	0	0	0.202374	0	0.632968	0.946607	-1.34666	-0.42939	0.792278	0.883221
hsa-miR-6777-3p	1.44949	0.975719	0	0	0	0.303561	0.410839	0.558501	1.1751	1.32208	0.402806	0.796646	0.884608
hsa-miR-339-3p	9.27675	9.14737	0.979185	1.08912	68.5518	7.6902	7.08698	18.5422	23.1103	-1.26137	-0.334995	0.79821	0.884608
hsa-miR-4485-3p	0	0.365895	4.26645	10.1425	3.50549	0	0.20542	6.32968	4.79832	-1.29013	-0.367516	0.798224	0.884608
hsa-miR-95-3p	1.44949	1.21965	0	0	0	0.202374	0.513549	0	0.848682	-1.33708	-0.41909	0.797569	0.884608
hsa-miR-455-5p	28.9899	28.2959	14.0583	22.8716	6.81623	10.6246	10.3737	31.3878	48.5707	1.25299	0.325372	0.802998	0.888681
hsa-miR-3177-5p	0.869696	0.975719	0	0	0	0.607121	0.513549	0	0.0326416	-1.31885	-0.399284	0.806125	0.890923
hsa-miR-151a-5p	7147.88	6426.94	3189.98	4158.75	5541.2	6510.36	5672.36	3442.57	2399.13	-1.17463	-0.232209	0.807267	0.890968
hsa-miR-15a-3p	1.01465	0.975719	0	0	0	0.303561	0.821679	0.930836	0	1.30534	0.384424	0.810527	0.893346
hsa-miR-200c-3p	3.04394	1.82947	0.349709	0	0.0973747	1.01187	0.410839	0	1.86057	-1.27921	-0.355251	0.81285	0.894688
hsa-miR-29b-1-5p	29.2798	38.6629	26.9276	27.7045	47.9083	80.7471	71.2806	6.29245	7.47493	1.21384	0.279574	0.816012	0.895731
hsa-miR-3152-5p	28.7	29.7594	0	0.0680701	0.194749	5.66647	4.72465	10.4998	15.9618	-1.27315	-0.348402	0.815882	0.895731
hsa-miR-874-5p	2.31919	4.14681	0	0	0	1.11306	1.12981	1.37764	2.83982	1.25902	0.332302	0.821925	0.900999
hsa-let-7f-5p	17501.5	15427.6	30071.8	28413.2	23531.3	24827.5	17994.5	20797	16109.5	-1.15338	-0.205866	0.82901	0.906469
hsa-miR-541-5p	1.01465	3.53698	0	0	0	0.708308	1.23252	0	0.946607	-1.26354	-0.337472	0.829156	0.906469
hsa-miR-1229-3p	1.88434	1.82947	0	0	0	0.202374	0.821679	1.26594	1.33831	1.24847	0.320157	0.83044	0.906648
hsa-miR-935	8.40706	8.53755	5.31558	7.96421	8.56897	0.809495	0	13.3668	11.6531	-1.19685	-0.259243	0.833293	0.907313
hsa-miR-32-3p	0.144949	0	4.19651	5.71789	17.2353	0	0.30813	7.11159	9.95569	-1.25589	-0.328708	0.832757	0.907313
hsa-miR-449a	22.902	27.808	1.53872	1.22526	3.79761	10.827	12.736	7.48392	7.50757	-1.1867	-0.246953	0.840877	0.91434
hsa-miR-598-3p	25.2212	20.2462	0	0	0.292124	6.57715	7.90866	6.47862	9.3355	-1.20716	-0.271614	0.843625	0.916097
hsa-miR-301b-3p	7.10252	15.3676	0	0	0.0973747	2.22611	6.67614	2.75527	3.19888	-1.21476	-0.280667	0.84943	0.921165
hsa-miR-2682-5p	5.36312	4.39074	0	0	0.194749	1.61899	2.56775	0.856369	1.5668	-1.20052	-0.263656	0.854068	0.924955
hsa-miR-15a-5p	22.757	26.2225	50.498	45.7431	70.1098	16.9994	32.559	39.4302	60.6155	-1.1508	-0.202643	0.859896	0.927637
hsa-miR-30e-3p	121.612	127.941	144.43	119.123	419.587	177.077	219.696	153.588	96.8803	-1.15321	-0.205661	0.859984	0.927637
hsa-miR-4435	5.36312	3.90288	0	0	0	2.22611	1.54065	2.34571	0	-1.21205	-0.277446	0.859566	0.927637
hsa-miR-1255b-5p	0.144949	0.853755	0	0	0.292124	0.910682	0.410839	0	0	1.21478	0.280694	0.861806	0.928364
hsa-miR-454-3p	64.0676	59.8848	0	0.0680701	3.70024	7.6902	14.9956	34.0686	28.3982	-1.19924	-0.262118	0.864081	0.929577
hsa-miR-6746-3p	2.75404	5.73235	0	0	0	1.5178	1.54065	3.72334	1.20774	1.18203	0.241261	0.871266	0.93482
hsa-miR-656-3p	34.6429	40.8583	0	0	0.194749	16.3923	36.5647	8.74986	9.49871	1.17565	0.233459	0.870876	0.93482
hsa-miR-382-3p	10.7262	21.7098	0.0699418	0	0.0973747	6.57715	6.05988	3.76058	5.84285	-1.1721	-0.229101	0.874245	0.936774
hsa-miR-369-3p	176.693	200.266	0.0699418	0.0680701	0.194749	71.4379	105.894	37.6802	42.173	-1.17363	-0.230973	0.876722	0.938186
hsa-miR-320c	1.88434	2.4393	6.8543	8.4407	0	1.5178	1.23252	11.8775	3.55794	1.15663	0.20993	0.878373	0.938711
hsa-miR-3688-3p	0.869696	0.853755	0	0	0.0973747	0	0.718969	0	0.979249	1.1865	0.246711	0.87999	0.939198
hsa-miR-505-5p	2.60909	4.63467	0	5.51368	3.70024	2.02374	2.77317	6.40415	3.78643	1.14112	0.190456	0.88116	0.939208
hsa-miR-499a-5p	3.76868	4.39074	6.015	3.26737	11.9771	3.03561	5.64904	9.19666	8.42154	1.12374	0.168309	0.882532	0.939432
hsa-miR-374b-3p	44.7893	39.1507	3.07744	3.74386	6.1346	19.1243	22.5962	11.3562	15.6027	-1.1274	-0.173001	0.884402	0.940185
hsa-miR-203a-3p	0.144949	0.365895	1.53872	0	0	0.202374	0	0.819136	0.913965	1.16866	0.224855	0.885984	0.940632
hsa-miR-625-3p	14.35	19.6364	0	0	0.389499	2.73205	2.77317	7.29775	11.0982	-1.14819	-0.199356	0.888594	0.942166
hsa-miR-500a-3p	0.434848	1.46358	0	0	0	0.101187	1.23252	0	0	-1.17378	-0.231157	0.895287	0.94802
hsa-miR-1273c	2.02929	1.46358	0	0	0	2.02374	0.410839	0	0.783399	1.15019	0.201875	0.900469	0.948541
hsa-miR-100-3p	18.1187	21.4658	0	0	51.1217	18.7196	31.9428	11.9519	19.2586	1.12789	0.17362	0.89949	0.948541
hsa-miR-374a-5p	19.4232	22.6855	0.139884	0.13614	0.973747	7.58902	13.9685	13.2179	4.14549	1.12315	0.167547	0.898465	0.948541
hsa-miR-5100	0	0	24.2698	17.0175	111.981	0.404748	0.10271	50.7864	54.3157	-1.16102	-0.215394	0.897966	0.948541
hsa-miR-664a-3p	49.2828	50.4935	0.0699418	0	0.0973747	39.5641	36.5647	8.37752	6.29983	1.13548	0.1833	0.905701	0.949109
hsa-miR-30c-1-3p	2.17424	0.975719	3.35721	3.13123	6.62148	3.94629	3.184	1.82444	3.1336	-1.09873	-0.135837	0.903812	0.949109
hsa-miR-22-5p	64.5024	68.7882	73.369	92.5754	69.4281	73.5629	76.108	57.8608	62.4108	-1.09962	-0.137008	0.90477	0.949109
hsa-miR-30b-3p	4.20353	3.29305	0	0	19.5723	7.99376	8.21679	1.3404	1.69736	-1.12836	-0.174226	0.905087	0.949109
hsa-miR-218-5p	115.09	106.475	0	0	621.445	236.98	353.014	1.26594	0.848682	-1.13909	-0.187885	0.906926	0.949163
hsa-miR-4286	1.44949	0.24393	0.629476	1.3614	1.1685	1.21424	0.513549	2.60634	0	1.11307	0.154545	0.90928	0.949452
hsa-miR-224-5p	1.59444	2.80519	11.8202	8.37263	339.253	0.101187	0.513549	157.646	100.112	-1.12653	-0.171884	0.909549	0.949452
hsa-miR-760	1.01465	0.121965	2.1682	0	2.14224	0	0	0.335101	3.52529	-1.12195	-0.166009	0.914721	0.95362
hsa-miR-128-3p	206.843	219.659	78.9643	81.2077	114.318	233.337	195.765	49.0737	37.9296	-1.08691	-0.120232	0.916426	0.954168
hsa-miR-2116-5p	1.15959	1.58554	0	0	0	0.910682	0.718969	0.819136	0	1.11569	0.157931	0.921932	0.958667
hsa-miR-138-1-3p	0	0	33.9218	17.2898	9.25059	1.92255	2.25962	11.0211	38.1907	1.1031	0.141562	0.923173	0.958725
hsa-miR-190a-5p	0.289899	0	4.12657	0.816842	0.292124	0	0	1.74997	2.25227	-1.10676	-0.146336	0.924801	0.959184
hsa-miR-19b-1-5p	0.434848	0.975719	2.1682	0	0	1.82136	1.43794	0	0	1.10447	0.14336	0.933383	0.96191
hsa-miR-548j-5p	2.02929	1.95144	0	0	0.0973747	0.708308	0.513549	0	2.31755	1.09824	0.135199	0.931095	0.96191
hsa-miR-548k	77.4029	58.9091	0	0	0.584248	39.7664	45.6032	21.2231	12.208	1.08471	0.117313	0.93929	0.96191
hsa-miR-1197	8.55201	8.29362	0.0699418	0	0	3.33917	4.72465	1.4521	5.05945	1.07875	0.109363	0.939516	0.96191
hsa-let-7g-5p	11352.7	9077.36	9618.26	11984.5	10350.4	16078.5	11558.2	6918.83	5275.8	-1.05212	-0.0732962	0.940508	0.96191
hsa-miR-103a-3p	777.218	561.405	229.479	370.914	242.463	709.927	648.407	157.497	125.54	-1.06334	-0.0886041	0.936229	0.96191
hsa-miR-769-5p	23.9166	21.3439	0	0	0.292124	15.9875	11.0927	2.30847	4.50454	-1.07555	-0.105078	0.939561	0.96191
hsa-miR-12135	34.9328	44.2733	0	0	0.0973747	16.5946	20.2338	16.8295	5.05945	-1.08049	-0.111687	0.938537	0.96191
hsa-miR-4685-3p	4.20353	4.26877	0.139884	0	0.292124	1.31543	2.67046	0.446801	2.12171	-1.08125	-0.112696	0.935289	0.96191
hsa-miR-137-3p	139.586	129.405	0.0699418	0.20421	7.10835	16.9994	17.2553	76.6636	92.3431	-1.08742	-0.120909	0.931105	0.96191
hsa-miR-7110-3p	1.01465	0.609825	0	0	0	0.607121	0.616259	0	0	-1.09084	-0.125445	0.939614	0.96191
hsa-miR-3620-3p	1.01465	0.609825	0	0	0	0	0	1.37764	0	1.08958	0.123777	0.944381	0.964652
hsa-miR-3180-3p	2.02929	1.58554	0	0	0	1.11306	2.0542	0	0	1.0837	0.115968	0.947116	0.966226
hsa-miR-2355-3p	0.144949	1.34161	0	0	0.0973747	0.303561	0	0	0.848682	-1.07003	-0.0976487	0.952512	0.970507
hsa-miR-769-3p	19.7131	15.7335	0	0	0.389499	8.39851	7.49782	6.18075	8.12776	1.05444	0.0764822	0.955073	0.971892
hsa-miR-4799-5p	1.59444	1.21965	0	0	0	0.910682	1.23252	0	0	-1.06617	-0.0924332	0.956971	0.9726
hsa-miR-7112-3p	2.46414	1.95144	0	0	0	1.61899	2.15691	0	0	1.05964	0.0835711	0.961386	0.973419
hsa-miR-6849-3p	1.15959	0.853755	0	0	0	0.404748	1.33523	0	0	1.0592	0.0829814	0.961046	0.973419
hsa-miR-1237-3p	4.78333	4.14681	0	0	0	1.41662	0.718969	1.60104	3.72114	1.05184	0.0729173	0.961171	0.973419
hsa-miR-6870-3p	0.724746	0.24393	0	0	0	0	0	0	0.750757	1.04389	0.0619631	0.971871	0.982804
hsa-miR-1910-5p	9.4217	7.3179	0	0	0	6.47596	4.51923	1.5638	1.27302	1.03219	0.0457141	0.975013	0.984751
hsa-miR-27b-3p	3486.76	2887.15	3000.57	5858.12	4766.1	6710.51	5745.69	1919.9	1324.83	-1.01901	-0.0271682	0.978918	0.987462
hsa-miR-550a-3p	1.01465	1.58554	0	0	0.486873	1.21424	0.821679	0.521268	0	1.02635	0.0375168	0.980504	0.98783
hsa-miR-3939	1.73939	0.365895	0	0	0	0.910682	0.821679	0	0	1.01348	0.0193144	0.991019	0.996278
hsa-miR-361-5p	104.798	111.354	75.8169	61.7396	50.148	126.484	148.313	21.5954	24.2201	-1.00845	-0.0121355	0.991352	0.996278
hsa-miR-423-3p	5969.3	4899.82	5671.37	4129.34	7990.47	8478.75	7321.98	3553	3655.18	1.0035	0.00503525	0.996008	0.998606
hsa-miR-544a	1.15959	1.82947	0	0	0	0	1.0271	1.3404	0	-1.00582	-0.00837663	0.996137	0.998606
hsa-miR-20a-3p	0.144949	0.365895	0	0	4.96611	0.505934	0	0	3.88435	1.00152	0.00219251	0.998947	0.998947
hsa-miR-874-3p	1.88434	3.65895	23.99	7.76	15.8721	1.01187	0.718969	17.4625	23.2082	-1.00253	-0.00363854	0.997755	0.998947
hsa-miR-1299	0	0	0	0	0	1.11306	0.718969	0	0	33.273	5.05628	0.0319031	#N/A
hsa-miR-5579-5p	0	0	0	0	0	0.303561	1.43794	0	0	31.6483	4.98406	0.0333065	#N/A
hsa-miR-3167	0	0	0	0	0	0.708308	0.30813	0	0	17.9566	4.16644	0.0664164	#N/A
hsa-miR-518b	0	0	0	0	0	0	0.20542	0.632968	0	16.5409	4.04797	0.0823249	#N/A
hsa-miR-4716-5p	0	0	0	0	0	0	0	0.707435	0	14.3382	3.84179	0.105917	#N/A
hsa-miR-6817-3p	0	0	0	0	0	0	0	0.707435	0	14.3382	3.84179	0.105918	#N/A
hsa-miR-6509-5p	0	0	0	0	0	0	0	0.670202	0	13.6514	3.77097	0.111137	#N/A
hsa-miR-2114-5p	0	0	0	0	0	0	0.10271	0.558501	0	13.4252	3.74688	0.101747	#N/A
hsa-miR-7975	0	0.121965	0	0	0	1.31543	0.513549	0	0	12.9843	3.69869	0.0615021	#N/A
hsa-miR-6827-5p	0	0	0	0	0	0.607121	0.10271	0	0	12.292	3.61965	0.108706	#N/A
hsa-miR-4536-3p	0	0	0	0	0	0	0	0.595735	0	12.2781	3.61802	0.121689	#N/A
hsa-miR-3154	0	0	0	0	0	0.505934	0.20542	0	0	12.1558	3.60357	0.107546	#N/A
hsa-miR-6795-3p	0	0	0	0	0	0.404748	0.30813	0	0	12.1024	3.59722	0.108041	#N/A
hsa-miR-4668-3p	0	0	0	0	0	0	0	0	0.554908	11.6618	3.54371	0.130522	#N/A
hsa-miR-4485-5p	0	0	0	0	0	0	0	0.521268	0	10.9051	3.44693	0.13582	#N/A
hsa-miR-3122	0	0	0	0	0	0	0	0.521268	0	10.9051	3.44693	0.136478	#N/A
hsa-miR-3675-5p	0	0	0	0	0	0	0	0.521268	0	10.9051	3.44693	0.137621	#N/A
hsa-miR-3162-3p	0	0	0	0	0	0	0	0.521268	0	10.9051	3.44693	0.137122	#N/A
hsa-miR-6783-5p	0	0	0	0	0	0.607121	0	0	0	10.7082	3.42064	0.132936	#N/A
hsa-miR-6505-3p	0	0	0	0	0	0	0.10271	0.409568	0	10.5898	3.4046	0.131915	#N/A
hsa-miR-3191-5p	0	0	0	0	0	0	0	0.484035	0	10.2185	3.35311	0.144606	#N/A
hsa-miR-627-3p	0	0	0	0	0	0	0	0.446801	0	9.53147	3.2527	0.159211	#N/A
hsa-miR-548f-5p	0	0	0	0	0	0.202374	0.30813	0	0	8.15366	3.02745	0.163979	#N/A
hsa-miR-6830-3p	0	0	0	0	0	0.202374	0.30813	0	0	8.15366	3.02745	0.164503	#N/A
hsa-miR-3617-5p	0	0	0	0	0	0	0.410839	0	0	6.87474	2.78131	0.212134	#N/A
hsa-miR-3130-3p	0	0	0	0	0	0	0.410839	0	0	6.87474	2.78131	0.213122	#N/A
hsa-miR-7106-3p	0	0	0	0	0	0.404748	0	0	0	6.80737	2.7671	0.209317	#N/A
hsa-miR-3529-5p	0	0	0	0	0	0.404748	0	0	0	6.80737	2.7671	0.210552	#N/A
hsa-miR-4483	0	0	0	0	0	0.404748	0	0	0	6.80737	2.7671	0.211017	#N/A
hsa-miR-6802-3p	0	0	0	0	0	0.404748	0	0	0	6.80737	2.7671	0.212337	#N/A
hsa-miR-605-3p	0	0	0	0	0	0.202374	0.20542	0	0	6.05903	2.59909	0.229387	#N/A
hsa-miR-320e	0	0	0	0	0	0	0	0.186167	0.0326416	5.76946	2.52844	0.241874	#N/A
hsa-miR-450a-2-3p	0	0.121965	0	0	0	0.809495	0	0	0	5.62971	2.49306	0.190438	#N/A
hsa-miR-122-3p	0	0	0	0	0.0973747	0	0	0.595735	0.0326416	5.44745	2.44558	0.204277	#N/A
hsa-miR-6733-3p	0.144949	0	0	0	0	0.404748	0.410839	0	0	5.40412	2.43406	0.181575	#N/A
hsa-miR-6131	0	0	0	0	0	0.101187	0	0.0372334	0.0979249	5.17508	2.37158	0.257754	#N/A
hsa-miR-6871-5p	0	0	0	0	0	0	0.30813	0	0	4.84366	2.2761	0.289879	#N/A
hsa-miR-7850-5p	0	0	0	0	0	0	0.30813	0	0	4.84366	2.2761	0.290531	#N/A
hsa-miR-6851-5p	0	0	0	0	0	0.303561	0	0	0	4.80732	2.26523	0.286237	#N/A
hsa-miR-6771-3p	0	0	0	0	0	0.303561	0	0	0	4.80732	2.26523	0.286272	#N/A
hsa-miR-4740-3p	0	0	0	0	0	0.303561	0	0	0	4.80732	2.26523	0.286875	#N/A
hsa-miR-3157-3p	0.144949	0.121965	0	0	0	0.607121	0.513549	0	0	4.60867	2.20435	0.196695	#N/A
hsa-miR-6735-3p	0.144949	0	0	0	0	0.101187	0	0.446801	0	4.4038	2.13875	0.246814	#N/A
hsa-miR-4772-3p	0	0.121965	0	0	0	0	0	0.521268	0	4.29852	2.10384	0.269128	#N/A
hsa-miR-3179	0	0	0	0	0	0.101187	0.20542	0	0	4.04942	2.01772	0.33415	#N/A
hsa-miR-4757-5p	0	0	0	0	0	0.101187	0.20542	0	0	4.04942	2.01772	0.335556	#N/A
hsa-miR-4661-5p	0	0	0	0	0	0.202374	0.10271	0	0	4.04199	2.01507	0.332263	#N/A
hsa-miR-616-3p	0	0	0	0	0	0.202374	0.10271	0	0	4.04199	2.01507	0.333348	#N/A
hsa-miR-4714-3p	0.144949	0	0	0	0	0.202374	0.410839	0	0	3.94963	1.98172	0.272875	#N/A
hsa-miR-6508-3p	0	0	0	0	0.0973747	0.505934	0	0	0	3.61299	1.85319	0.319464	#N/A
hsa-miR-508-3p	0.144949	0.121965	0	0	0	0.505934	0.30813	0	0	3.28302	1.71502	0.314448	#N/A
hsa-miR-3913-5p	0	0	0	0	0	0	0.20542	0	0.0326416	3.2564	1.70328	0.40828	#N/A
hsa-miR-4443	0.289899	0	0	0	0	0.202374	0.20542	0	0.293775	3.22005	1.68708	0.313709	#N/A
hsa-miR-6770-5p	0.144949	0.121965	0	0	0	0.505934	0.20542	0	0	2.83883	1.5053	0.374664	#N/A
hsa-miR-3121-3p	0.289899	0	0	0	0	0.202374	0.513549	0	0	2.78861	1.47955	0.39203	#N/A
hsa-miR-544b	0	0	0	0	0	0	0.20542	0	0	2.74863	1.45871	0.49264	#N/A
hsa-miR-1265	0	0	0	0	0	0	0.20542	0	0	2.74863	1.45871	0.493993	#N/A
hsa-miR-489-3p	0	0	0	0	0	0	0.20542	0	0	2.74863	1.45871	0.495327	#N/A
hsa-miR-4781-5p	0	0	0	0	0	0	0.20542	0	0	2.74863	1.45871	0.495437	#N/A
hsa-miR-6809-5p	0	0	0	0	0	0	0.20542	0	0	2.74863	1.45871	0.495603	#N/A
hsa-miR-6780b-5p	0	0	0	0	0	0	0.20542	0	0	2.74863	1.45871	0.495767	#N/A
hsa-miR-6832-3p	0	0	0	0	0	0.202374	0	0	0	2.7438	1.45618	0.485748	#N/A
hsa-miR-6812-5p	0	0	0	0	0	0.202374	0	0	0	2.7438	1.45618	0.486295	#N/A
hsa-miR-6739-3p	0	0	0	0	0	0.202374	0	0	0	2.7438	1.45618	0.48684	#N/A
hsa-miR-146b-3p	0	0	0	0	0	0.202374	0	0	0	2.7438	1.45618	0.487038	#N/A
hsa-miR-1228-5p	0	0	0	0	0	0.202374	0	0	0	2.7438	1.45618	0.487799	#N/A
hsa-miR-3940-5p	0	0	0	0	0	0.202374	0	0	0	2.7438	1.45618	0.488372	#N/A
hsa-miR-4717-5p	0	0	0	0	0	0.202374	0	0	0	2.7438	1.45618	0.489154	#N/A
hsa-miR-4743-5p	0	0	0	0	0	0.202374	0	0	0	2.7438	1.45618	0.489922	#N/A
hsa-miR-488-3p	0	0	0	0	0	0.202374	0	0	0	2.7438	1.45618	0.490677	#N/A
hsa-miR-1343-5p	0	0	0	0	0.194749	0.202374	0.410839	0	0	2.69117	1.42823	0.407942	#N/A
hsa-miR-4676-5p	0	0.121965	0	0	0	0	0.410839	0	0	2.6901	1.42766	0.42472	#N/A
hsa-miR-6806-3p	0	0.121965	0	0	0	0	0.410839	0	0	2.6901	1.42766	0.425786	#N/A
hsa-miR-3150a-5p	0.144949	0	0	0	0	0	0.410839	0	0	2.6066	1.38217	0.442581	#N/A
hsa-miR-6734-5p	0.144949	0	0	0	0	0.404748	0	0	0	2.58165	1.36829	0.441481	#N/A
hsa-miR-1233-3p	0	0.365895	0	0	0	0.404748	0.410839	0.0372334	0	2.5414	1.34562	0.410988	#N/A
hsa-miR-6852-5p	0	0.121965	0	0	0.0973747	0.202374	0.410839	0	0	2.53024	1.33928	0.428201	#N/A
hsa-miR-6758-3p	0	0.24393	0	0	0	0.505934	0.10271	0	0	2.49735	1.3204	0.447099	#N/A
hsa-miR-4694-3p	0.144949	0	0	0	0	0.101187	0.30813	0	0	2.46403	1.30102	0.453133	#N/A
hsa-miR-512-3p	0.144949	0.121965	0	0	0	0.607121	0	0	0	2.42795	1.27974	0.466176	#N/A
hsa-miR-7-2-3p	0.144949	0.121965	0	0	0	0	0	0.484035	0	2.40397	1.26542	0.472996	#N/A
hsa-miR-548i	0.289899	0	0	0	0	0.101187	0.513549	0	0	2.37186	1.24602	0.471561	#N/A
hsa-miR-548ay-3p	0	0	0	0	0	0.101187	0.10271	0	0	2.29623	1.19927	0.563863	#N/A
hsa-miR-4783-3p	0	0	0	0	0	0.101187	0.10271	0	0	2.29623	1.19927	0.564655	#N/A
hsa-miR-6726-3p	0	0	0	0	0	0.101187	0	0.0372334	0	2.29572	1.19895	0.53357	#N/A
hsa-miR-4769-3p	0	0	0	0	0	0.101187	0	0.0372334	0	2.29572	1.19895	0.53357	#N/A
hsa-miR-548ap-5p	0	0	0	0	0	0	0	0.0372334	0.0326416	2.2951	1.19856	0.533715	#N/A
hsa-miR-6750-3p	0	0.365895	0	0	0	0.404748	0.30813	0	0	2.10076	1.07091	0.531093	#N/A
hsa-miR-6883-3p	0.289899	0.121965	0	0	0	0.101187	0.20542	0	0.293775	2.04741	1.0338	0.515782	#N/A
hsa-miR-3134	0.144949	0.24393	0	0	0	0.202374	0.513549	0	0	2.03981	1.02844	0.535413	#N/A
hsa-miR-1234-3p	0.144949	0.24393	0	0	0	0	0	0.595735	0	2.01819	1.01306	0.573801	#N/A
hsa-miR-6820-3p	0.144949	0.121965	0	0	0	0.202374	0.30813	0	0	1.92677	0.946184	0.570754	#N/A
hsa-miR-643	0.144949	0.48786	0	0	0	1.01187	0	0	0	1.86486	0.899064	0.608619	#N/A
hsa-miR-520g-3p	0.144949	0	0	0	0	0	0.30813	0	0	1.86426	0.898602	0.616098	#N/A
hsa-miR-3149	0	0.365895	0	0	0	0.505934	0.10271	0	0	1.78444	0.835468	0.622729	#N/A
hsa-miR-1226-5p	0.144949	0.24393	0	0	0	0.505934	0.10271	0	0	1.72004	0.782445	0.63619	#N/A
hsa-miR-3065-3p	0.579797	0	0	0	0	0.202374	0	0.521268	0	1.6618	0.732751	0.679844	#N/A
hsa-miR-548au-5p	0.289899	0	0	0	0	0	0.410839	0	0	1.55002	0.632284	0.716485	#N/A
hsa-miR-3916	0.144949	0.24393	0	0	0	0	0.513549	0	0	1.44354	0.529607	0.756304	#N/A
hsa-miR-1827	0.144949	0.365895	0.209825	0	0	0.708308	0.10271	0	0.0979249	1.39645	0.481764	0.759961	#N/A
hsa-miR-3193	0	0.48786	0	0	0	0.607121	0	0	0	1.39236	0.477537	0.787292	#N/A
hsa-miR-6743-3p	0.144949	0.24393	0	0	0	0	0	0.372334	0	1.36433	0.44819	0.790832	#N/A
hsa-miR-520d-3p	0	0	0	0	0	0	0.10271	0	0	1.33554	0.417425	0.841093	#N/A
hsa-miR-6779-3p	0	0	0	0	0	0	0.10271	0	0	1.33554	0.417425	0.841093	#N/A
hsa-miR-6828-5p	0	0	0	0	0	0	0.10271	0	0	1.33554	0.417425	0.841093	#N/A
hsa-miR-3127-5p	0	0	0	0	0	0	0.10271	0	0	1.33554	0.417425	0.841093	#N/A
hsa-miR-516b-5p	0	0	0	0	0	0	0.10271	0	0	1.33554	0.417425	0.841093	#N/A
hsa-miR-6836-3p	0	0	0	0	0	0	0.10271	0	0	1.33554	0.417425	0.841093	#N/A
hsa-miR-514a-3p	0	0	0	0	0	0	0.10271	0	0	1.33554	0.417425	0.841093	#N/A
hsa-miR-1252-3p	0	0	0	0	0	0	0.10271	0	0	1.33554	0.417425	0.841093	#N/A
hsa-miR-4707-5p	0	0	0	0	0	0	0.10271	0	0	1.33554	0.417425	0.841093	#N/A
hsa-miR-1914-3p	0	0	0	0	0	0	0.10271	0	0	1.33554	0.417425	0.841093	#N/A
hsa-miR-1193	0	0	0	0	0	0	0.10271	0	0	1.33554	0.417425	0.841093	#N/A
hsa-miR-548aw	0	0	0	0	0	0	0.10271	0	0	1.33554	0.417425	0.841093	#N/A
hsa-miR-4794	0	0	0	0	0	0	0.10271	0	0	1.33554	0.417425	0.841093	#N/A
hsa-miR-7155-5p	0	0	0	0	0	0	0.10271	0	0	1.33554	0.417425	0.841093	#N/A
hsa-miR-5699-5p	0	0	0	0	0	0	0.10271	0	0	1.33554	0.417425	0.841093	#N/A
hsa-miR-6886-3p	0	0	0	0	0	0	0.10271	0	0	1.33554	0.417425	0.841093	#N/A
hsa-miR-4999-5p	0	0	0	0	0	0	0.10271	0	0	1.33554	0.417425	0.841093	#N/A
hsa-miR-202-5p	0	0	0	0	0	0	0.10271	0	0	1.33554	0.417425	0.841093	#N/A
hsa-miR-6783-3p	0	0	0	0	0	0	0.10271	0	0	1.33554	0.417425	0.841093	#N/A
hsa-miR-3925-5p	0	0	0	0	0	0.101187	0	0	0	1.33554	0.417422	0.841094	#N/A
hsa-miR-4785	0	0	0	0	0	0.101187	0	0	0	1.33554	0.417422	0.841094	#N/A
hsa-miR-517a-3p	0	0	0	0	0	0.101187	0	0	0	1.33554	0.417422	0.841094	#N/A
hsa-miR-548e-5p	0	0	0	0	0	0.101187	0	0	0	1.33554	0.417422	0.841094	#N/A
hsa-miR-6782-3p	0	0	0	0	0	0.101187	0	0	0	1.33554	0.417422	0.841094	#N/A
hsa-miR-6876-5p	0	0	0	0	0	0.101187	0	0	0	1.33554	0.417422	0.841094	#N/A
hsa-miR-517-5p	0	0	0	0	0	0.101187	0	0	0	1.33554	0.417422	0.841094	#N/A
hsa-miR-6720-3p	0	0	0	0	0	0.101187	0	0	0	1.33554	0.417422	0.841094	#N/A
hsa-miR-4750-5p	0	0	0	0	0	0.101187	0	0	0	1.33554	0.417422	0.841094	#N/A
hsa-miR-6809-3p	0	0	0	0	0	0.101187	0	0	0	1.33554	0.417422	0.841094	#N/A
hsa-miR-3680-5p	0	0	0	0	0	0.101187	0	0	0	1.33554	0.417422	0.841094	#N/A
hsa-miR-4447	0	0	0	0	0	0.101187	0	0	0	1.33554	0.417422	0.841094	#N/A
hsa-miR-6757-5p	0	0	0	0	0	0.101187	0	0	0	1.33554	0.417422	0.841094	#N/A
hsa-miR-4802-5p	0	0	0	0	0	0.101187	0	0	0	1.33554	0.417422	0.841094	#N/A
hsa-miR-6889-5p	0	0	0	0	0	0.101187	0	0	0	1.33554	0.417422	0.841094	#N/A
hsa-miR-4711-5p	0	0	0	0	0	0.101187	0	0	0	1.33554	0.417422	0.841094	#N/A
hsa-miR-4470	0	0	0	0	0	0.101187	0	0	0	1.33554	0.417422	0.841094	#N/A
hsa-miR-4451	0	0	0	0	0	0.101187	0	0	0	1.33554	0.417422	0.841094	#N/A
hsa-miR-346	0	0	0	0	0	0.101187	0	0	0	1.33554	0.417422	0.841094	#N/A
hsa-miR-513c-5p	0	0	0	0	0	0.101187	0	0	0	1.33554	0.417422	0.841094	#N/A
hsa-miR-5009-5p	0	0	0	0	0	0.101187	0	0	0	1.33554	0.417422	0.841094	#N/A
hsa-miR-548ak	0	0	0	0	0	0	0	0.0372334	0	1.33525	0.417105	0.841219	#N/A
hsa-miR-374c-5p	0	0	0	0	0	0	0	0.0372334	0	1.33525	0.417105	0.841219	#N/A
hsa-miR-3178	0	0	0	0	0	0	0	0.0372334	0	1.33525	0.417105	0.841219	#N/A
hsa-miR-548bb-5p	0	0	0	0	0	0	0	0	0.0326416	1.33518	0.417034	0.841247	#N/A
hsa-miR-6877-5p	0	0	0	0	0	0	0	0	0.0326416	1.33518	0.417034	0.841247	#N/A
hsa-miR-888-5p	0	0	0	0	0	0	0	0	0.0326416	1.33518	0.417034	0.841247	#N/A
hsa-miR-1228-3p	0	0	0	0	0	0	0	0	0.0326416	1.33518	0.417034	0.841247	#N/A
hsa-miR-3115	0.434848	0.609825	0	0	0	0.910682	0.20542	0	0	1.28249	0.35895	0.834556	#N/A
hsa-miR-4684-3p	0.724746	0.365895	0	0	0	0.708308	0.410839	0	0	1.24368	0.314617	0.855202	#N/A
hsa-miR-6130	0	0	0.139884	0	0	0	0	0.1117	0.0326416	1.13187	0.178702	0.913399	#N/A
hsa-miR-6895-3p	0.144949	0.24393	0	0	0	0	0.410839	0	0	1.12958	0.175784	0.91729	#N/A
hsa-miR-597-3p	0.289899	0	0	0	0	0.303561	0	0	0	1.12312	0.16751	0.921278	#N/A
hsa-miR-3120-3p	0.144949	0.121965	0	0	0	0	0.30813	0	0	1.11734	0.160063	0.923055	#N/A
hsa-miR-1278	0.289899	0.24393	0	0	0	0	0	0.409568	0	1.1026	0.140913	0.934111	#N/A
hsa-miR-598-5p	0	0.121965	0	0	0	0	0.20542	0	0	1.10027	0.137851	0.935884	#N/A
hsa-miR-3677-3p	0	0.121965	0	0	0	0.202374	0	0	0	1.09881	0.135941	0.936012	#N/A
hsa-miR-3170	0	0.121965	0	0	0	0.202374	0	0	0	1.09881	0.135941	0.936131	#N/A
hsa-miR-6764-3p	0	0.121965	0	0	0	0.202374	0	0	0	1.09881	0.135941	0.936537	#N/A
hsa-miR-4753-3p	0	0.121965	0	0	0	0.202374	0	0	0	1.09881	0.135941	0.936932	#N/A
hsa-miR-6832-5p	0.144949	0	0	0	0	0	0.20542	0	0	1.09775	0.134554	0.93747	#N/A
hsa-miR-3136-5p	0.144949	0	0	0	0	0	0.20542	0	0	1.09775	0.134554	0.937456	#N/A
hsa-miR-3679-3p	0.144949	0	0	0	0	0	0.20542	0	0	1.09775	0.134554	0.937442	#N/A
hsa-miR-6804-5p	0.144949	0	0	0	0	0.202374	0	0	0	1.09596	0.132194	0.938137	#N/A
hsa-miR-6727-3p	0.434848	0	0	0	0	0	0.410839	0	0	1.08291	0.114916	0.947686	#N/A
hsa-miR-4668-5p	0.434848	0	0	0	0	0.303561	0.10271	0	0	1.06488	0.0906933	0.956976	#N/A
hsa-miR-548y	0	0.121965	0	0	0	0.101187	0.10271	0	0	-1.02872	-0.0408533	0.9804	#N/A
hsa-miR-4456	0.144949	0	0	0	0	0.101187	0.10271	0	0	-1.02875	-0.0408878	0.98053	#N/A
hsa-miR-4669	0.434848	0.365895	0	0	0	0	0.616259	0	0	-1.10776	-0.147644	0.930124	#N/A
hsa-miR-137-5p	0.724746	0.365895	0	0	0	0.505934	0.30813	0	0	-1.11816	-0.161133	0.923056	#N/A
hsa-miR-6871-3p	0.289899	0.24393	0	0	0	0.101187	0.30813	0	0	-1.20127	-0.264562	0.872524	#N/A
hsa-miR-6513-3p	0.579797	0	0	0	0	0.101187	0.30813	0	0	-1.22088	-0.287926	0.865221	#N/A
hsa-miR-200b-5p	0	0	0	0	0.194749	0.202374	0	0	0	-1.27444	-0.349861	0.832127	#N/A
hsa-miR-4717-3p	1.30454	0.121965	0	0	0	0.404748	0.513549	0	0	-1.27644	-0.352129	0.840131	#N/A
hsa-miR-6753-3p	0.144949	0.24393	0	0	0	0.101187	0.20542	0	0	-1.33262	-0.414268	0.799179	#N/A
hsa-miR-549a-5p	0.289899	0	0	0	0	0	0.20542	0	0	-1.39718	-0.482516	0.776907	#N/A
hsa-miR-6818-3p	0.289899	0	0	0	0	0	0.20542	0	0	-1.39718	-0.482516	0.777023	#N/A
hsa-miR-6804-3p	0.289899	0	0	0	0	0.202374	0	0	0	-1.40345	-0.488982	0.77199	#N/A
hsa-miR-766-5p	0.144949	0.121965	0	0	0	0.101187	0.10271	0	0	-1.62206	-0.697832	0.673903	#N/A
hsa-miR-4742-5p	0.144949	0.121965	0	0	0	0.101187	0.10271	0	0	-1.62206	-0.697832	0.673926	#N/A
hsa-miR-6129	0	0	0	0.0680701	0.0973747	0	0	0.0372334	0.0326416	-1.62257	-0.698278	0.646851	#N/A
hsa-miR-106a-5p	0.289899	0.24393	0	0.0680701	0.292124	0.303561	0.20542	0	0	-1.75266	-0.809544	0.592715	#N/A
hsa-miR-127-5p	0	0	0	0	0.0973747	0	0.10271	0	0	-1.76864	-0.822641	0.620032	#N/A
hsa-miR-4502	0	0	0	0	0.0973747	0.101187	0	0	0	-1.76864	-0.822644	0.618674	#N/A
hsa-miR-4722-5p	0	0.121965	0	0	0	0	0.10271	0	0	-1.76871	-0.822696	0.639795	#N/A
hsa-miR-664b-5p	0	0.121965	0	0	0	0	0.10271	0	0	-1.76871	-0.822696	0.640536	#N/A
hsa-miR-4646-3p	0	0.121965	0	0	0	0.101187	0	0	0	-1.76871	-0.822699	0.636997	#N/A
hsa-miR-4730	0	0.121965	0	0	0	0.101187	0	0	0	-1.76871	-0.822699	0.637727	#N/A
hsa-miR-3150a-3p	0	0.121965	0	0	0	0.101187	0	0	0	-1.76871	-0.822699	0.638457	#N/A
hsa-miR-6843-3p	0.144949	0	0	0	0	0	0.10271	0	0	-1.76875	-0.822731	0.642827	#N/A
hsa-miR-3684	0.144949	0	0	0	0	0.101187	0	0	0	-1.76875	-0.822733	0.639987	#N/A
hsa-miR-4429	0.144949	0	0	0	0	0	0	0.0372334	0	-1.76914	-0.823051	0.616453	#N/A
hsa-miR-200a-5p	0.289899	0.121965	0	0	0.584248	0.303561	0.20542	0	0	-1.81128	-0.857013	0.589208	#N/A
hsa-miR-181b-2-3p	0	0.853755	0	0	0	0.202374	0.20542	0	0	-1.85674	-0.892771	0.601518	#N/A
hsa-miR-320a-5p	0	0	0	0.816842	0	0.404748	0	0	0	-1.89795	-0.92444	0.60893	#N/A
hsa-miR-6721-5p	0	0.365895	0	0	0	0.101187	0.10271	0	0	-1.93045	-0.948937	0.570408	#N/A
hsa-miR-4638-5p	0.434848	0	0	0	0	0	0.20542	0	0	-1.94244	-0.95787	0.571745	#N/A
hsa-miR-3662	0.434848	0.73179	0	0	0	0.202374	0.30813	0	0	-1.98401	-0.988421	0.547276	#N/A
hsa-miR-491-3p	0.289899	0.121965	0	0	0	0	0.20542	0	0	-2.01504	-1.01081	0.542151	#N/A
hsa-miR-6829-3p	1.15959	0.609825	0	0	0	0.505934	0.20542	0	0	-2.07442	-1.05271	0.547108	#N/A
hsa-miR-3174	1.01465	0.609825	0	0	0	0.505934	0.10271	0	0	-2.24172	-1.16461	0.50281	#N/A
hsa-miR-4750-3p	0	0.365895	0	0	0.0973747	0.202374	0	0	0	-2.38376	-1.25324	0.46079	#N/A
hsa-miR-3613-3p	0	0	0	0	0.194749	0.101187	0	0	0	-2.69715	-1.43144	0.41879	#N/A
hsa-miR-3117-5p	0	0.24393	0	0	0	0	0.10271	0	0	-2.75233	-1.46065	0.405691	#N/A
hsa-miR-6796-3p	0	0.24393	0	0	0	0	0.10271	0	0	-2.75233	-1.46065	0.405112	#N/A
hsa-miR-6890-3p	0	0.24393	0	0	0	0.101187	0	0	0	-2.75243	-1.46071	0.40227	#N/A
hsa-miR-6892-3p	0	0.24393	0	0	0	0.101187	0	0	0	-2.75243	-1.46071	0.405245	#N/A
hsa-miR-5698	0	0.24393	0	0	0	0.101187	0	0	0	-2.75243	-1.46071	0.406423	#N/A
hsa-miR-6776-3p	0.289899	0	0	0	0	0	0.10271	0	0	-2.77098	-1.4704	0.405319	#N/A
hsa-miR-3064-3p	0.289899	0	0	0	0	0	0.10271	0	0	-2.77098	-1.4704	0.403467	#N/A
hsa-miR-1267	0	0.609825	0	0	0	0	0.20542	0	0	-2.78244	-1.47635	0.404748	#N/A
hsa-miR-1538	0	0.121965	0	0	0.0973747	0.101187	0	0	0	-2.78869	-1.47959	0.390614	#N/A
hsa-miR-4803	0.144949	0.121965	0	0	0	0	0.10271	0	0	-2.78886	-1.47967	0.385577	#N/A
hsa-miR-545-3p	0.144949	0.121965	0	0	0	0	0.10271	0	0	-2.78886	-1.47967	0.384707	#N/A
hsa-miR-6736-5p	0.144949	0.121965	0	0	0	0.101187	0	0	0	-2.78886	-1.47968	0.389386	#N/A
hsa-miR-3682-3p	0.144949	0.121965	0	0	0	0.101187	0	0	0	-2.78886	-1.47968	0.388649	#N/A
hsa-miR-6854-3p	0.144949	0.121965	0	0	0	0.101187	0	0	0	-2.78886	-1.47968	0.387986	#N/A
hsa-miR-548am-3p	0	0.24393	0	0	0	0	0	0	0.0326416	-2.78955	-1.48003	0.401953	#N/A
hsa-miR-5187-5p	0.724746	0	0	0	0	0.202374	0	0	0	-3.11732	-1.64031	0.357095	#N/A
hsa-miR-6807-3p	0.434848	0.24393	0	0	0	0.202374	0	0	0	-3.13546	-1.64868	0.335258	#N/A
hsa-miR-6813-3p	0.289899	0.24393	0	0	0.0973747	0	0.20542	0	0	-3.20396	-1.67986	0.31376	#N/A
hsa-miR-548n	0.869696	0.24393	0	0	0	0.101187	0.20542	0	0	-3.22635	-1.6899	0.312299	#N/A
hsa-miR-1290	1.15959	0	0	0	0	0.101187	0.20542	0	0	-3.23033	-1.69168	0.334032	#N/A
hsa-miR-6815-5p	0.144949	0.853755	0	0	0.0973747	0.202374	0.10271	0	0	-3.36727	-1.75158	0.285029	#N/A
hsa-miR-362-3p	0	0.365895	0	0	0	0	0.10271	0	0	-3.6655	-1.87401	0.298904	#N/A
hsa-miR-548ab	0	0.609825	0	0	0	0	0.10271	0	0.0326416	-3.66897	-1.87538	0.284232	#N/A
hsa-miR-6799-3p	0.434848	1.34161	0	0	0	0	0.410839	0	0	-3.69005	-1.88364	0.297451	#N/A
hsa-miR-5585-3p	0.434848	0	0	0	0	0.101187	0	0	0	-3.86688	-1.95117	0.278307	#N/A
hsa-miR-1268b	0	1.09768	0	0	0	0	0.20542	0	0.0326416	-3.91044	-1.96733	0.263986	#N/A
hsa-miR-509-3-5p	0.144949	0.853755	0	0	0	0.101187	0.10271	0	0	-4.61479	-2.20626	0.202366	#N/A
hsa-miR-4709-3p	0	0.48786	0	0	0	0.101187	0	0	0	-4.63263	-2.21183	0.231967	#N/A
hsa-miR-3911	0.869696	0.24393	0	0	0	0.202374	0	0	0	-4.89402	-2.29102	0.193935	#N/A
hsa-miR-584-3p	0.434848	0.73179	0	0	0	0	0.20542	0	0	-5.19448	-2.37698	0.17619	#N/A
hsa-miR-3619-3p	0	0.609825	0	0	0	0.101187	0	0	0	-5.5994	-2.48527	0.188484	#N/A
hsa-miR-4731-3p	0.144949	0.853755	0.0699418	0	0.0973747	0	0.20542	0	0	-5.64364	-2.49663	0.140752	#N/A
hsa-miR-676-3p	0.724746	0	0	0	0	0.101187	0	0	0	-6.17585	-2.62664	0.165908	#N/A
hsa-miR-10400-5p	0	0	0	0.0680701	0	0	0	0	0	-6.29498	-2.6542	0.298943	#N/A
hsa-miR-572	0	0	0	0.0680701	0	0	0	0	0	-6.29498	-2.6542	0.298943	#N/A
hsa-miR-4680-3p	0	0	0	0.0680701	0	0	0	0	0	-6.29498	-2.6542	0.298943	#N/A
hsa-miR-5702	0	0	0	0.0680701	0	0	0	0	0	-6.29498	-2.6542	0.298943	#N/A
hsa-miR-378c	0	0	0.0699418	0	0	0	0	0	0	-6.29503	-2.65421	0.298941	#N/A
hsa-miR-548d-3p	0	0	0	0	0.0973747	0	0	0	0	-6.29549	-2.65432	0.298918	#N/A
hsa-miR-4661-3p	0	0	0	0	0.0973747	0	0	0	0	-6.29549	-2.65432	0.298918	#N/A
hsa-miR-1976	0	0	0	0	0.0973747	0	0	0	0	-6.29549	-2.65432	0.298918	#N/A
hsa-miR-1909-3p	0	0	0	0	0.0973747	0	0	0	0	-6.29549	-2.65432	0.298918	#N/A
hsa-miR-6529-5p	0	0	0	0	0.0973747	0	0	0	0	-6.29549	-2.65432	0.298918	#N/A
hsa-miR-885-5p	0	0	0	0	0.0973747	0	0	0	0	-6.29549	-2.65432	0.298918	#N/A
hsa-miR-6887-3p	0	0	0	0	0.0973747	0	0	0	0	-6.29549	-2.65432	0.298918	#N/A
hsa-miR-182-3p	0	0	0	0	0.0973747	0	0	0	0	-6.29549	-2.65432	0.298918	#N/A
hsa-miR-548a-5p	0	0.121965	0	0	0	0	0	0	0	-6.29573	-2.65437	0.298907	#N/A
hsa-miR-5188	0	0.121965	0	0	0	0	0	0	0	-6.29573	-2.65437	0.298907	#N/A
hsa-miR-6837-5p	0	0.121965	0	0	0	0	0	0	0	-6.29573	-2.65437	0.298907	#N/A
hsa-miR-190b-3p	0	0.121965	0	0	0	0	0	0	0	-6.29573	-2.65437	0.298907	#N/A
hsa-miR-5695	0	0.121965	0	0	0	0	0	0	0	-6.29573	-2.65437	0.298907	#N/A
hsa-miR-5191	0	0.121965	0	0	0	0	0	0	0	-6.29573	-2.65437	0.298907	#N/A
hsa-miR-550a-3-5p	0	0.121965	0	0	0	0	0	0	0	-6.29573	-2.65437	0.298907	#N/A
hsa-miR-4795-3p	0	0.121965	0	0	0	0	0	0	0	-6.29573	-2.65437	0.298907	#N/A
hsa-miR-6516-3p	0	0.121965	0	0	0	0	0	0	0	-6.29573	-2.65437	0.298907	#N/A
hsa-miR-548c-3p	0	0.121965	0	0	0	0	0	0	0	-6.29573	-2.65437	0.298907	#N/A
hsa-miR-4695-5p	0	0.121965	0	0	0	0	0	0	0	-6.29573	-2.65437	0.298907	#N/A
hsa-miR-5000-5p	0	0.121965	0	0	0	0	0	0	0	-6.29573	-2.65437	0.298907	#N/A
hsa-miR-6836-5p	0	0.121965	0	0	0	0	0	0	0	-6.29573	-2.65437	0.298907	#N/A
hsa-miR-6798-3p	0	0.121965	0	0	0	0	0	0	0	-6.29573	-2.65437	0.298907	#N/A
hsa-miR-181b-3p	0	0.121965	0	0	0	0	0	0	0	-6.29573	-2.65437	0.298907	#N/A
hsa-miR-515-3p	0	0.121965	0	0	0	0	0	0	0	-6.29573	-2.65437	0.298907	#N/A
hsa-miR-556-5p	0	0.121965	0	0	0	0	0	0	0	-6.29573	-2.65437	0.298907	#N/A
hsa-miR-3663-5p	0	0.121965	0	0	0	0	0	0	0	-6.29573	-2.65437	0.298907	#N/A
hsa-miR-3139	0	0.121965	0	0	0	0	0	0	0	-6.29573	-2.65437	0.298907	#N/A
hsa-miR-2392	0	0.121965	0	0	0	0	0	0	0	-6.29573	-2.65437	0.298907	#N/A
hsa-miR-3159	0	0.121965	0	0	0	0	0	0	0	-6.29573	-2.65437	0.298907	#N/A
hsa-miR-449c-5p	0	0.121965	0	0	0	0	0	0	0	-6.29573	-2.65437	0.298907	#N/A
hsa-miR-4682	0	0.121965	0	0	0	0	0	0	0	-6.29573	-2.65437	0.298907	#N/A
hsa-miR-6859-3p	0	0.121965	0	0	0	0	0	0	0	-6.29573	-2.65437	0.298907	#N/A
hsa-miR-5002-3p	0	0.121965	0	0	0	0	0	0	0	-6.29573	-2.65437	0.298907	#N/A
hsa-miR-4653-3p	0	0.121965	0	0	0	0	0	0	0	-6.29573	-2.65437	0.298907	#N/A
hsa-miR-6825-5p	0	0.121965	0	0	0	0	0	0	0	-6.29573	-2.65437	0.298907	#N/A
hsa-miR-6801-5p	0	0.121965	0	0	0	0	0	0	0	-6.29573	-2.65437	0.298907	#N/A
hsa-miR-6793-5p	0	0.121965	0	0	0	0	0	0	0	-6.29573	-2.65437	0.298907	#N/A
hsa-miR-522-3p	0.144949	0	0	0	0	0	0	0	0	-6.29588	-2.65441	0.298899	#N/A
hsa-miR-4726-3p	0.144949	0	0	0	0	0	0	0	0	-6.29588	-2.65441	0.298899	#N/A
hsa-miR-659-5p	0.144949	0	0	0	0	0	0	0	0	-6.29588	-2.65441	0.298899	#N/A
hsa-miR-5010-5p	0.144949	0	0	0	0	0	0	0	0	-6.29588	-2.65441	0.298899	#N/A
hsa-miR-548u	0.144949	0	0	0	0	0	0	0	0	-6.29588	-2.65441	0.298899	#N/A
hsa-miR-6511a-5p	0.144949	0	0	0	0	0	0	0	0	-6.29588	-2.65441	0.298899	#N/A
hsa-miR-141-5p	0.144949	0	0	0	0	0	0	0	0	-6.29588	-2.65441	0.298899	#N/A
hsa-miR-6767-3p	0.144949	0	0	0	0	0	0	0	0	-6.29588	-2.65441	0.298899	#N/A
hsa-miR-10396b-5p	0.144949	0	0	0	0	0	0	0	0	-6.29588	-2.65441	0.298899	#N/A
hsa-miR-6727-5p	0.144949	0	0	0	0	0	0	0	0	-6.29588	-2.65441	0.298899	#N/A
hsa-miR-7109-5p	0.144949	0	0	0	0	0	0	0	0	-6.29588	-2.65441	0.298899	#N/A
hsa-miR-659-3p	0.144949	0	0	0	0	0	0	0	0	-6.29588	-2.65441	0.298899	#N/A
hsa-miR-4647	0.144949	0	0	0	0	0	0	0	0	-6.29588	-2.65441	0.298899	#N/A
hsa-miR-6769a-3p	0.144949	0	0	0	0	0	0	0	0	-6.29588	-2.65441	0.298899	#N/A
hsa-miR-4734	0.144949	0	0	0	0	0	0	0	0	-6.29588	-2.65441	0.298899	#N/A
hsa-miR-4516	0.144949	0	0	0	0	0	0	0	0	-6.29588	-2.65441	0.298899	#N/A
hsa-miR-4691-5p	0.144949	0	0	0	0	0	0	0	0	-6.29588	-2.65441	0.298899	#N/A
hsa-miR-4758-5p	0.144949	0	0	0	0	0	0	0	0	-6.29588	-2.65441	0.298899	#N/A
hsa-miR-18b-5p	0.144949	0	0	0	0	0	0	0	0	-6.29588	-2.65441	0.298899	#N/A
hsa-miR-6856-3p	0.144949	0	0	0	0	0	0	0	0	-6.29588	-2.65441	0.298899	#N/A
hsa-miR-514a-5p	0.144949	0	0	0	0	0	0	0	0	-6.29588	-2.65441	0.298899	#N/A
hsa-miR-3614-3p	0.144949	0	0	0	0	0	0	0	0	-6.29588	-2.65441	0.298899	#N/A
hsa-miR-4779	0.144949	0	0	0	0	0	0	0	0	-6.29588	-2.65441	0.298899	#N/A
hsa-miR-6761-5p	0.144949	0	0	0	0	0	0	0	0	-6.29588	-2.65441	0.298899	#N/A
hsa-miR-6857-3p	0.144949	0	0	0	0	0	0	0	0	-6.29588	-2.65441	0.298899	#N/A
hsa-miR-4765	0.144949	0	0	0	0	0	0	0	0	-6.29588	-2.65441	0.298899	#N/A
hsa-miR-891a-5p	0.144949	0	0	0	0	0	0	0	0	-6.29588	-2.65441	0.298899	#N/A
hsa-miR-767-5p	0.144949	0	0	0	0	0	0	0	0	-6.29588	-2.65441	0.298899	#N/A
hsa-miR-3148	0.144949	0	0	0	0	0	0	0	0	-6.29588	-2.65441	0.298899	#N/A
hsa-miR-4745-3p	0.144949	0	0	0	0	0	0	0	0	-6.29588	-2.65441	0.298899	#N/A
hsa-miR-6729-5p	0.144949	0	0	0	0	0	0	0	0	-6.29588	-2.65441	0.298899	#N/A
hsa-miR-4504	0.144949	0	0	0	0	0	0	0	0	-6.29588	-2.65441	0.298899	#N/A
hsa-miR-9903	0.144949	0	0	0	0	0	0	0	0	-6.29588	-2.65441	0.298899	#N/A
hsa-miR-6805-3p	0.144949	0	0	0	0	0	0	0	0	-6.29588	-2.65441	0.298899	#N/A
hsa-miR-4501	0.144949	0.609825	0	0	0	0	0.10271	0	0	-6.93867	-2.79466	0.133856	#N/A
hsa-miR-3928-3p	0.289899	0.48786	0	0	0	0.101187	0	0	0	-7.14474	-2.83688	0.126953	#N/A
hsa-miR-4677-3p	0.869696	0.853755	0	0	0	0.202374	0	0	0	-7.52587	-2.91186	0.105684	#N/A
hsa-miR-4695-3p	1.01465	0	0.0699418	0	0.0973747	0	0	0.0744669	0	-8.04245	-3.00763	0.0975147	#N/A
hsa-miR-216a-3p	0	0.121965	0	0	0.0973747	0	0	0	0	-9.92635	-3.31126	0.179681	#N/A
hsa-miR-6767-5p	0	0.121965	0	0	0.0973747	0	0	0	0	-9.92635	-3.31126	0.179681	#N/A
hsa-miR-6892-5p	0.144949	0.121965	0	0	0	0	0	0	0	-9.92696	-3.31135	0.185325	#N/A
hsa-miR-6810-3p	0.144949	0.121965	0	0	0	0	0	0	0	-9.92696	-3.31135	0.18591	#N/A
hsa-miR-3127-3p	0.144949	0.121965	0	0	0	0	0	0	0	-9.92696	-3.31135	0.186547	#N/A
hsa-miR-5580-5p	0.144949	0.121965	0	0	0	0	0	0	0	-9.92696	-3.31135	0.187248	#N/A
hsa-miR-6844	0.144949	0.121965	0	0	0	0	0	0	0	-9.92696	-3.31135	0.187888	#N/A
hsa-miR-3200-5p	0	0	0	0	0.194749	0	0	0	0	-10.0186	-3.32461	0.185222	#N/A
hsa-miR-4659b-3p	0	0	0	0	0.194749	0	0	0	0	-10.0186	-3.32461	0.185968	#N/A
hsa-miR-6888-3p	1.73939	0.609825	0	0	0	0.202374	0	0	0	-10.0265	-3.32574	0.0764884	#N/A
hsa-miR-4781-3p	0	0.24393	0	0	0	0	0	0	0	-10.1366	-3.34151	0.18649	#N/A
hsa-miR-3667-3p	0	0.24393	0	0	0	0	0	0	0	-10.1366	-3.34151	0.186316	#N/A
hsa-miR-302a-5p	0	0.24393	0	0	0	0	0	0	0	-10.1366	-3.34151	0.186144	#N/A
hsa-miR-6730-5p	0	0.24393	0	0	0	0	0	0	0	-10.1366	-3.34151	0.185974	#N/A
hsa-miR-219a-2-3p	0	0.24393	0	0	0	0	0	0	0	-10.1366	-3.34151	0.186587	#N/A
hsa-miR-4706	0	0.24393	0	0	0	0	0	0	0	-10.1366	-3.34151	0.187203	#N/A
hsa-miR-449b-5p	0	0.24393	0	0	0	0	0	0	0	-10.1366	-3.34151	0.187826	#N/A
hsa-miR-4529-3p	0	0.24393	0	0	0	0	0	0	0	-10.1366	-3.34151	0.188459	#N/A
hsa-miR-6501-3p	0	0.24393	0	0	0	0	0	0	0	-10.1366	-3.34151	0.188549	#N/A
hsa-miR-6837-3p	0	0.24393	0	0	0	0	0	0	0	-10.1366	-3.34151	0.188014	#N/A
hsa-miR-4436b-5p	0	0.24393	0	0	0	0	0	0	0	-10.1366	-3.34151	0.188632	#N/A
hsa-miR-6759-3p	0	0.24393	0	0	0	0	0	0	0	-10.1366	-3.34151	0.188847	#N/A
hsa-miR-6781-3p	0	0.24393	0	0	0	0	0	0	0	-10.1366	-3.34151	0.189103	#N/A
hsa-miR-4687-3p	0	0.24393	0	0	0	0	0	0	0	-10.1366	-3.34151	0.189022	#N/A
hsa-miR-3164	0	0.24393	0	0	0	0	0	0	0	-10.1366	-3.34151	0.188947	#N/A
hsa-miR-6857-5p	0	0.24393	0	0	0	0	0	0	0	-10.1366	-3.34151	0.189146	#N/A
hsa-miR-4482-3p	0	0.24393	0	0	0	0	0	0	0	-10.1366	-3.34151	0.19046	#N/A
hsa-miR-548ar-5p	0.289899	0	0	0	0	0	0	0	0	-10.4242	-3.38186	0.189948	#N/A
hsa-miR-624-3p	0.289899	0	0	0	0	0	0	0	0	-10.4242	-3.38186	0.190347	#N/A
hsa-miR-1245b-3p	0.289899	0	0	0	0	0	0	0	0	-10.4242	-3.38186	0.190738	#N/A
hsa-miR-6505-5p	0.289899	0	0	0	0	0	0	0	0	-10.4242	-3.38186	0.190335	#N/A
hsa-miR-4743-3p	0.289899	0	0	0	0	0	0	0	0	-10.4242	-3.38186	0.189929	#N/A
hsa-miR-1292-3p	0.289899	1.09768	0	0	0	0.101187	0	0	0	-12.2043	-3.60932	0.0592498	#N/A
hsa-miR-5583-3p	0	0.24393	0	0	0.0973747	0	0	0	0	-13.5577	-3.76104	0.145375	#N/A
hsa-miR-4749-5p	0	0.24393	0	0	0.0973747	0	0	0	0	-13.5577	-3.76104	0.145803	#N/A
hsa-miR-6757-3p	0.144949	0.24393	0	0	0	0	0	0	0	-13.6162	-3.76726	0.1426	#N/A
hsa-miR-6742-3p	0.144949	0.24393	0	0	0	0	0	0	0	-13.6162	-3.76726	0.14259	#N/A
hsa-miR-196b-3p	0.144949	0.24393	0	0	0	0	0	0	0	-13.6162	-3.76726	0.142581	#N/A
hsa-miR-6815-3p	0.144949	0.24393	0	0	0	0	0	0	0	-13.6162	-3.76726	0.142362	#N/A
hsa-miR-6785-3p	0.289899	0.121965	0	0	0	0	0	0	0	-13.8206	-3.78875	0.140555	#N/A
hsa-miR-3121-5p	0.289899	0.121965	0	0	0	0	0	0	0	-13.8206	-3.78875	0.140891	#N/A
hsa-miR-577	0	0	0	0	0.292124	0	0	0	0	-13.9917	-3.8065	0.150208	#N/A
hsa-miR-7845-5p	0	0.365895	0	0	0	0	0	0	0	-15.0743	-3.91402	0.137779	#N/A
hsa-miR-6502-5p	0	0.365895	0	0	0	0	0	0	0	-15.0743	-3.91402	0.137129	#N/A
hsa-miR-4687-5p	0	0.365895	0	0	0	0	0	0	0	-15.0743	-3.91402	0.136485	#N/A
hsa-miR-6746-5p	0	0.365895	0	0	0	0	0	0	0	-15.0743	-3.91402	0.136417	#N/A
hsa-miR-525-5p	0	0.365895	0	0	0	0	0	0	0	-15.0743	-3.91402	0.136828	#N/A
hsa-miR-302c-3p	0	0.365895	0	0	0	0	0	0	0	-15.0743	-3.91402	0.136667	#N/A
hsa-miR-5189-3p	0	0.365895	0	0	0	0	0	0	0	-15.0743	-3.91402	0.136022	#N/A
hsa-miR-4489	0	0.365895	0	0	0	0	0	0	0	-15.0743	-3.91402	0.135382	#N/A
hsa-miR-3176	0.434848	0	0	0	0	0	0	0	0	-16.2218	-4.01986	0.126911	#N/A
hsa-miR-548v	0.434848	0	0	0	0	0	0	0	0	-16.2218	-4.01986	0.126934	#N/A
hsa-miR-147a	0	0	0.0699418	0.13614	0.0973747	0	0	0	0	-17.1835	-4.10295	0.107884	#N/A
hsa-miR-452-5p	0.289899	0.121965	0	0	0.0973747	0	0	0	0	-17.1903	-4.10352	0.112202	#N/A
hsa-miR-215-5p	0	0	0	0	1.36325	0	0	0	0.0326416	-17.8799	-4.16027	0.049743	#N/A
hsa-miR-371a-3p	0.289899	0.24393	0	0	0	0	0	0	0	-18.9718	-4.24578	0.106084	#N/A
hsa-miR-3938	0.289899	0.24393	0	0	0	0	0	0	0	-18.9718	-4.24578	0.10688	#N/A
hsa-miR-4725-5p	0.289899	0.24393	0	0	0	0	0	0	0	-18.9718	-4.24578	0.107296	#N/A
hsa-miR-1271-3p	0.289899	0.24393	0	0	0	0	0	0	0	-18.9718	-4.24578	0.107341	#N/A
hsa-miR-4524a-3p	0.289899	0.24393	0	0	0	0	0	0	0	-18.9718	-4.24578	0.108073	#N/A
hsa-miR-6869-5p	0.144949	0.365895	0	0	0	0	0	0	0	-19.2801	-4.26904	0.104554	#N/A
hsa-miR-3619-5p	0.144949	0.365895	0	0	0	0	0	0	0	-19.2801	-4.26904	0.104906	#N/A
hsa-miR-4482-5p	0	0.48786	0	0	0	0	0	0	0	-19.9957	-4.32162	0.106785	#N/A
hsa-miR-6845-3p	0.434848	0.121965	0	0	0	0	0	0	0	-20.0775	-4.32751	0.103724	#N/A
hsa-miR-551a	0.434848	0.121965	0	0	0	0	0	0	0	-20.0775	-4.32751	0.104385	#N/A
hsa-miR-582-3p	0.289899	0.121965	0	0	0.194749	0	0	0	0	-21.4018	-4.41966	0.0966091	#N/A
hsa-miR-223-5p	0	0	0	0	0.486873	0	0	0	0	-21.7648	-4.44393	0.106998	#N/A
hsa-miR-4726-5p	0.579797	0	0	0	0	0	0	0	0	-22.0897	-4.4653	0.0995935	#N/A
hsa-miR-10398-3p	0.579797	0	0	0	0	0	0	0	0	-22.0897	-4.4653	0.0993219	#N/A
hsa-miR-450b-3p	0	0	0.139884	0.13614	0.194749	0	0	0	0	-24.4423	-4.61131	0.0812128	#N/A
hsa-miR-188-3p	0.289899	0.365895	0	0	0	0	0	0	0	-24.4743	-4.6132	0.0860218	#N/A
hsa-miR-556-3p	0.144949	0.48786	0	0	0	0	0	0	0	-24.5428	-4.61723	0.087697	#N/A
hsa-miR-516a-5p	0.434848	0.24393	0	0	0	0	0	0	0	-24.9713	-4.6422	0.0837769	#N/A
hsa-miR-3614-5p	0.579797	0.121965	0	0	0	0	0	0	0	-26.1031	-4.70615	0.0813546	#N/A
hsa-miR-615-5p	0.579797	0.121965	0	0	0	0	0	0	0	-26.1031	-4.70615	0.0815451	#N/A
hsa-miR-3611	0.579797	0.121965	0	0	0	0	0	0	0	-26.1031	-4.70615	0.0815392	#N/A
hsa-miR-6788-3p	0.144949	0.48786	0.0699418	0	0	0	0	0	0	-27.0762	-4.75895	0.0760645	#N/A
hsa-miR-3620-5p	0.289899	0.48786	0	0	0	0	0	0	0	-29.7706	-4.89581	0.0723296	#N/A
hsa-miR-10399-5p	0.434848	0.365895	0	0	0	0	0	0	0	-30.1679	-4.91494	0.0710347	#N/A
hsa-miR-6826-3p	0.434848	0.365895	0	0	0	0	0	0	0	-30.1679	-4.91494	0.0709603	#N/A
hsa-miR-2278	0.434848	0.365895	0	0	0	0	0	0	0	-30.1679	-4.91494	0.0713134	#N/A
hsa-miR-378e	0	0	0.139884	0.408421	0.0973747	0	0	0	0	-32.9018	-5.04009	0.0656855	#N/A
hsa-miR-4638-3p	0.869696	0	0	0	0	0	0	0	0	-33.7476	-5.07671	0.0689761	#N/A
hsa-miR-4758-3p	0.724746	0.24393	0	0	0	0	0	0	0	-36.8187	-5.20237	0.058231	#N/A
hsa-miR-664a-5p	0	0	0	0	0.876372	0	0	0	0	-37.103	-5.21347	0.0651044	#N/A
hsa-miR-663b	0.144949	0.853755	0	0	0	0	0	0	0	-39.5922	-5.30715	0.0565168	#N/A
hsa-miR-3177-3p	0.289899	0.73179	0	0	0	0	0	0	0	-39.9637	-5.32062	0.0550127	#N/A
hsa-miR-3189-3p	0.434848	0.609825	0	0	0	0	0	0	0	-40.4432	-5.33783	0.0541813	#N/A
hsa-miR-4732-5p	0	0	0	0	1.07112	0	0	0	0	-44.7416	-5.48355	0.0538763	#N/A
hsa-miR-4683	0.579797	0.609825	0	0	0	0	0	0	0	-46.0877	-5.52631	0.0461506	#N/A
hsa-miR-378b	0	0	0.279767	0.476491	0.292124	0	0	0	0	-50.8824	-5.66909	0.0370471	#N/A
hsa-miR-5002-5p	0.724746	0.609825	0	0	0	0	0	0	0	-51.7821	-5.69438	0.0407161	#N/A
hsa-miR-1285-3p	0.434848	0.853755	0	0	0.0973747	0	0	0	0	-53.8121	-5.74986	0.037381	#N/A
hsa-miR-3194-3p	0.724746	0.73179	0	0	0	0	0	0	0	-56.7549	-5.82667	0.0369696	#N/A
hsa-miR-3200-3p	0.724746	0.975719	0	0	0	0	0	0	0	-66.6305	-6.05811	0.0303063	#N/A
hsa-miR-4731-5p	0.579797	1.21965	0	0	0	0	0	0	0	-70.8114	-6.14591	0.0291094	#N/A
hsa-miR-497-3p	0	0	0	0	1.75274	0	0	0	0	-71.433	-6.15852	0.0336727	#N/A
hsa-miR-5001-3p	0.869696	0.975719	0	0	0	0	0	0	0	-72.2872	-6.17567	0.0278062	#N/A
hsa-miR-1298-5p	0.434848	0.121965	0	0	1.36325	0	0	0	0	-77.1037	-6.26873	0.0255065	#N/A
hsa-miR-217-5p	0.869696	1.21965	0	0	0.194749	0	0	0	0	-89.2282	-6.47943	0.0217296	#N/A

## Sheet: IsoMirs
Name	prim-brain#1	prim-brain#2	prim-brain#3	prim-brain#4	prim-brain#5	prim-lung#1	prim-lung#2	prim-lung#3	prim-lung#4	Fold change	Log fold change	P-value	FDR p-value
hsa-miR-126-3p	233701	249632	283846	812310	806090	126.179	106.775	170.65	225.19	-3034.86	-11.5674	1.36632e-58	2.86107e-55
hsa-miR-139-5p	3076.54	3242.6	18746.1	9845.18	5732.72	6.78823	7.10632	14.2102	13.7352	-776.305	-9.60048	2.44506e-36	2.55998e-33
hsa-miR-126-5p	1297.68	2041.14	1372.69	2871.56	2295.72	1.33013	1.44535	3.47832	4.34182	-740.099	-9.53157	4.49448e-33	3.13715e-30
hsa-miR-143-3p	13.2265	17.6847	17.8794	22.9385	25.194	3676.33	5019.71	6533.77	7542.25	294.448	8.20187	9.58442e-31	5.01744e-28
hsa-miR-490-5p	2.96116	2.7288	0.863392	2.40613	8.42725	496.504	651.131	3018.67	1867.28	435.518	8.76659	2.50099e-24	1.04742e-21
hsa-miR-150-5p	7.00807	8.13391	1444.82	1617.72	1423.59	1.69706	1.44535	1.86642	0.459231	-656.196	-9.35798	8.03422e-18	2.80394e-15
hsa-miR-493-3p	34.3988	29.0197	2.51823	3.44879	1.75568	1177.57	1567.36	988.268	1091.88	84.6603	6.40361	1.29735e-12	3.78657e-10
hsa-miR-145-5p	3.15857	3.93576	3.63344	0.240613	0.175568	188.97	202.711	129.08	239.886	84.139	6.3947	1.44664e-12	3.78657e-10
hsa-miR-338-5p	3.84951	4.51301	10.5046	16.4419	17.3812	1.00906	0.301115	0.0424186	0.25049	-25.9683	-4.69868	4.40254e-11	1.02433e-08
hsa-miR-199a-5p	41.6043	64.5465	2.15848	3.12797	2.1946	1618.95	2599.89	1003.62	959.793	67.9567	6.08654	1.15155e-10	2.41135e-08
hsa-miR-139-3p	23.4425	30.3316	256.895	170.274	206.906	3.02718	0.963568	4.92055	0.50098	-58.2575	-5.86437	2.5798e-10	4.911e-08
hsa-miR-4793-3p	3.05986	3.6209	139.186	435.911	460.251	2.98132	3.25204	1.73916	1.66993	-86.3097	-6.43145	5.93354e-10	1.0354e-07
hsa-miR-493-5p	19.8891	22.7225	6.00777	2.24572	0.70227	847.245	1110.93	183.503	396.692	61.4055	5.9403	1.85573e-09	2.98915e-07
hsa-miR-6769a-5p	2.27022	2.20403	282.581	491.092	611.59	2.79785	2.64981	5.30232	2.54665	-83.4657	-6.38311	2.0724e-09	3.09972e-07
hsa-miR-146a-5p	1598.38	1888.17	695.391	1958.91	1424.91	61.9655	75.339	59.9799	56.6107	-23.8408	-4.57536	3.78878e-09	5.28914e-07
hsa-miR-451a	106.256	206.496	40.1478	144.368	9264.35	11.0538	18.2476	21.4638	31.687	-94.6861	-6.56508	4.55822e-09	5.96557e-07
hsa-miR-1468-5p	1.57928	1.88917	3.2737	0.0802044	1.40454	17.1082	23.1859	25.7481	27.5539	13.9078	3.79782	1.64223e-08	2.02284e-06
hsa-miR-6821-3p	1.23382	0.83963	21.297	31.4401	18.0835	0.779729	0.361338	1.06046	0.375735	-22.3824	-4.4843	2.3307e-08	2.71138e-06
hsa-miR-2467-3p	1.38187	1.31192	385.253	147.897	72.9483	3.25652	2.40892	0.127256	0.125245	-82.119	-6.35964	3.26817e-08	3.60187e-06
hsa-miR-326	82.1228	85.3798	200.019	176.851	175.568	7.33863	6.68476	6.10827	7.93218	-20.4995	-4.35752	1.00449e-07	1.0517e-05
hsa-miR-1910-3p	0.987053	1.67926	150.194	56.7045	15.011	1.19253	0.722676	0.0848371	2.79714	-37.2629	-5.21967	1.26198e-07	1.25838e-05
hsa-miR-12113	1.77669	1.52183	12.3033	25.906	24.3161	1.10079	0.722676	0.254511	1.2942	-15.4981	-3.95402	1.58594e-07	1.50953e-05
hsa-miR-514a-3p	1.97411	1.99412	32.7729	37.9367	63.2043	1.10079	1.20446	2.54511	1.96217	-16.1207	-4.01084	6.26549e-07	5.70432e-05
hsa-miR-6895-3p	0.592232	0.892106	20.9373	27.8309	61.0097	1.00906	0.963568	2.16335	0.292238	-19.9949	-4.32156	7.15057e-07	6.23887e-05
hsa-miR-187-3p	7.4029	6.13979	64.6105	119.745	144.668	4.81597	2.22825	2.71479	7.13896	-16.1855	-4.01663	1.27616e-06	0.000106891
hsa-miR-652-3p	345.715	432.042	4509.82	7310.07	7330.39	189.428	183.981	270.037	318.957	-16.5647	-4.05004	1.64678e-06	0.000132629
hsa-miR-4471	5.77426	5.30016	2.80603	6.09554	7.98833	0.596264	0.361338	1.27256	0.333986	-8.50041	-3.08753	1.71564e-06	0.000133058
hsa-miR-4797-3p	148.058	377.833	6.94311	0.240613	1.14119	2.84372	2.83048	1.69674	1.79518	-46.5364	-5.54029	2.1455e-06	0.000157305
hsa-miR-3182	13.0784	11.44	4.17306	3.12797	4.74033	292.811	257.755	32.7896	22.3771	20.6649	4.36911	2.17853e-06	0.000157305
hsa-miR-498-3p	1.77669	2.67632	9.35342	20.5323	6.58379	1.33013	1.08401	0.381767	0.793218	-9.08765	-3.18391	2.6717e-06	0.000186485
hsa-miR-6759-5p	22.7516	22.9324	6.79922	2.32593	3.59914	272.355	260.465	212.729	188.953	19.9502	4.31833	2.80233e-06	0.000189293
hsa-miR-6748-5p	3.50404	3.04366	84.6484	169.713	201.2	3.85278	3.9145	4.45395	4.96805	-21.4769	-4.42472	3.20052e-06	0.000209434
hsa-miR-4670-3p	1.38187	0.99706	2.26641	8.90269	5.17924	0.321065	0.782899	0.0848371	0.125245	-11.4833	-3.52146	3.91465e-06	0.000248403
hsa-miR-8065	2.96116	3.41099	0.971317	0.72184	0.790054	13.6223	9.39479	14.592	14.5702	7.23921	2.85583	4.11967e-06	0.000253723
hsa-miR-16-2-3p	10.9069	11.0201	36.982	69.2966	113.943	2.01812	4.75762	6.19311	5.26029	-10.609	-3.40722	4.28648e-06	0.000256454
hsa-miR-182-5p	9.13024	11.4924	13.4545	160.73	56.5328	2.88958	6.92565	4.07218	2.25441	-12.4496	-3.63803	7.83443e-06	0.000455703
hsa-miR-335-5p	1.67799	1.46935	49.8969	223.45	112.627	3.07305	4.81784	2.33302	6.88847	-18.1689	-4.1834	8.07716e-06	0.000457123
hsa-miR-5187-3p	2.02346	2.41393	1.36704	0.160409	0.263351	31.602	18.9703	3.05414	2.63014	11.1045	3.47308	8.67595e-06	0.00047809
hsa-miR-132-5p	128.514	173.541	51.8395	51.7319	81.2878	953.609	1158.45	961.714	1460.86	11.6382	3.5408	9.8725e-06	0.000530077
hsa-miR-127-3p	7547.84	8130.29	93.1744	241.014	699.022	36645.1	40036.3	65630	68096.6	15.7383	3.97621	1.09166e-05	0.000571485
hsa-miR-147b-3p	1.43123	1.10201	12.4832	35.29	45.1209	1.46773	0.963568	1.10288	2.96413	-11.6896	-3.54715	1.33063e-05	0.000679597
hsa-miR-4641	2.76375	2.46641	19.966	92.0747	81.5512	1.92639	3.07137	2.75721	5.63602	-11.8534	-3.56722	1.40196e-05	0.000698976
hsa-miR-4512	2.8131	2.7288	9.53329	23.1791	56.3572	2.84372	1.68624	2.16335	1.33595	-9.39165	-3.23138	1.53721e-05	0.000731572
hsa-miR-1251-5p	3.7508	3.25356	31.1541	85.4979	49.0711	2.15572	2.77026	5.30232	2.92238	-10.4842	-3.39014	1.50406e-05	0.000731572
hsa-miR-370-3p	12.1901	18.8392	2.12251	3.04777	2.63351	26.8777	35.7123	176.037	276.374	16.5437	4.04821	1.64295e-05	0.000764517
hsa-miR-145-3p	3.60274	3.93576	3.56149	7.1382	5.00368	12.3381	14.8149	28.4204	96.1463	8.17023	3.03038	1.83562e-05	0.000835605
hsa-miR-183-5p	6.31714	7.97648	36.1186	482.67	202.781	11.7418	8.06989	1.65432	5.80301	-21.5743	-4.43124	2.08891e-05	0.000930678
hsa-miR-6731-3p	0.9377	0.314861	13.9942	15.2388	15.9767	1.19253	1.20446	0.59386	0.50098	-10.6076	-3.40703	2.25581e-05	0.000984099
hsa-miR-144-3p	0.9377	1.10201	2.37433	0.160409	28.8809	0.412798	0.240892	0.848371	0.0834966	-16.6066	-4.05369	2.73944e-05	0.0011534
hsa-miR-4636	1.62864	1.46935	1.87068	0.160409	3.7747	8.48529	12.8877	17.6461	10.7293	6.98661	2.80459	2.75405e-05	0.0011534
hsa-miR-501-3p	4.44174	5.77245	20.6495	47.6414	22.1215	1.60532	3.79405	1.39981	3.84084	-7.5558	-2.91758	3.15093e-05	0.00129374
hsa-miR-936	2.61569	3.14861	1.87068	1.92491	2.1946	31.2809	23.1859	6.02344	5.67777	7.00092	2.80754	3.27107e-05	0.00130854
hsa-miR-571	0.987053	1.25944	50.2207	20.9334	17.9079	0.64213	1.20446	2.41786	2.46315	-10.8196	-3.43558	3.31197e-05	0.00130854
hsa-miR-8083	1.72734	3.09613	7.80651	11.2286	7.28606	1.37599	1.02379	0.763534	0.166993	-7.46388	-2.89993	4.62948e-05	0.00179521
hsa-miR-4727-5p	4.09627	2.88623	29.0316	27.1893	27.213	1.92639	4.27584	1.99367	1.83693	-7.21117	-2.85023	4.91884e-05	0.00187274
hsa-miR-485-5p	38.2483	45.5499	3.92124	2.80716	1.58011	170.715	209.576	387.494	582.305	18.3043	4.19411	5.25041e-05	0.00196328
hsa-miR-448	0.592232	0.629722	5.2523	7.45901	4.30141	0.458664	0.542007	0.254511	0.50098	-8.23183	-3.04121	5.39576e-05	0.00198223
hsa-miR-1228-3p	1.08576	1.46935	0.251823	0.240613	1.49232	3.43998	5.35985	3.13897	12.1905	6.63987	2.73116	5.50152e-05	0.00198624
hsa-miR-4750-3p	1.67799	2.7288	30.8663	41.5459	45.5598	2.88958	2.40892	3.52074	2.54665	-8.5933	-3.10321	5.66728e-05	0.0020114
hsa-miR-200c-5p	0.9377	1.73174	4.53281	9.94535	14.9232	0.779729	1.20446	0.89079	0.333986	-7.95958	-2.99269	5.90129e-05	0.00205955
hsa-miR-34c-3p	0.888347	1.15449	1723.76	2127.34	2941.9	37.3811	44.9866	61.5069	73.7692	-24.9742	-4.64236	6.09402e-05	0.00209195
hsa-miR-3925-3p	8.04448	8.55373	7.55468	2.72695	1.05341	24.9055	23.1859	59.1739	39.4939	6.52315	2.70557	7.2007e-05	0.00243198
hsa-miR-5690	1.57928	1.62678	17.7715	39.3804	47.2277	1.97226	2.64981	2.24818	3.67385	-8.14203	-3.02539	8.4792e-05	0.00279258
hsa-miR-210-5p	2.61569	1.78421	0.719494	0	5.17924	6.05437	10.7197	22.906	31.3112	8.61964	3.10763	8.53512e-05	0.00279258
hsa-miR-181a-2-3p	91.1543	98.2891	3.38162	13.3139	17.469	358.079	426.439	783.853	926.311	13.9406	3.80122	8.89451e-05	0.0028654
hsa-miR-369-5p	998.503	1106	4.89256	10.587	29.7587	2538.98	3398.39	10647.2	11202.8	16.1569	4.01408	9.30458e-05	0.00295209
hsa-miR-662	10.7589	6.13979	3.16577	0.160409	3.248	169.018	71.9063	8.9079	10.3953	13.8138	3.78804	0.000104204	0.00325676
hsa-miR-6722-5p	0.888347	0.682199	1.54691	12.1911	3.7747	0.733863	0.722676	0.0424186	0.166993	-9.1166	-3.1885	0.000122046	0.00375829
hsa-miR-105-3p	3.45468	4.14567	0.971317	4.97268	1.66789	10.0447	6.86543	41.1036	20.0809	6.41826	2.68218	0.000133498	0.00396345
hsa-miR-4668-5p	4.09627	3.56843	5.36023	21.2542	6.75935	1.23839	2.64981	0.169674	0.0834966	-7.9509	-2.99112	0.000132924	0.00396345
hsa-miR-4684-5p	0.789642	0.577245	3.34565	2.48634	56.1816	1.10079	1.02379	0.0848371	1.87867	-12.3336	-3.62452	0.000134386	0.00396345
hsa-miR-939-3p	6.07037	4.82787	25.0744	57.1056	57.1473	3.16478	4.4565	2.79963	7.2642	-6.78325	-2.76198	0.000147395	0.0042093
hsa-miR-4772-5p	2.12216	2.51889	11.9436	8.10065	2.01903	1.37599	1.44535	0.254511	0.25049	-6.45594	-2.69063	0.000145754	0.0042093
hsa-miR-8071	2.91181	3.35852	2.33835	0.320818	2.54573	12.4298	16.0193	16.8826	8.18267	5.76205	2.52658	0.000148753	0.0042093
hsa-miR-6742-3p	19.4449	21.4106	1.69081	4.81227	2.54573	159.432	158.266	73.978	39.9949	10.7929	3.432	0.00015801	0.00441163
hsa-miR-6890-3p	5.03397	4.9853	23.2396	93.5986	92.3486	5.18291	3.73383	3.18139	9.26812	-8.1941	-3.03459	0.000162409	0.00447479
hsa-miR-200b-3p	6.02102	9.07849	23.7073	32.0016	157.66	5.64157	7.10632	3.18139	6.51273	-8.13608	-3.02433	0.000195865	0.0053265
hsa-miR-1258	9.42635	7.924	6.47544	1.28327	4.91589	83.2017	45.107	17.4764	15.1129	6.67184	2.73808	0.00020155	0.00541084
hsa-miR-3911	2.86245	3.6209	62.524	6.49656	3.16022	2.66025	2.16803	1.65432	1.54469	-7.83678	-2.97026	0.000213099	0.00564848
hsa-miR-3925-5p	9.67312	12.3321	0.863392	0.0802044	0.438919	26.7401	24.3301	87.1702	49.6387	10.008	3.32308	0.00022989	0.00587596
hsa-miR-554	3.40533	3.09613	29.6791	16.6825	25.6329	2.70612	3.61338	0.254511	2.71364	-6.75908	-2.75683	0.000230099	0.00587596
hsa-miR-299-5p	5.57685	6.3497	0.143899	0.0802044	2.1946	32.2441	46.0104	13.5315	9.81085	8.8147	3.13991	0.000227181	0.00587596
hsa-miR-6075	3.50404	2.88623	2.30238	7.45901	0.526703	77.1932	11.7435	4.36911	10.6041	7.77554	2.95894	0.00025448	0.00642025
hsa-miR-10b-3p	1.72734	1.88917	5.64803	4.17063	3.7747	0.779729	0.782899	0.805953	0.0834966	-5.62522	-2.49191	0.000263835	0.00657703
hsa-miR-4795-3p	1.57928	1.46935	6.40349	3.6092	11.4119	1.14666	0.542007	1.27256	0.25049	-6.03337	-2.59296	0.000270801	0.00667127
hsa-miR-199a-3p	2165.94	2477.69	27.9883	13.4743	32.6556	10079.6	15380.7	12181.9	12648.9	13.3248	3.73604	0.0002796	0.00680793
hsa-miR-337-3p	296.659	305.52	4.74866	4.25084	9.744	544.526	967.423	2405.77	2447.83	12.8132	3.67956	0.00028549	0.00687146
hsa-miR-337-5p	24.8737	31.0138	8.59795	11.3088	11.4997	47.5635	53.2974	195.253	312.653	8.71005	3.12268	0.000308284	0.00733575
hsa-miR-6803-3p	4.6885	4.88035	21.297	40.5032	77.0742	3.66931	4.03494	5.55683	6.42924	-6.01895	-2.58951	0.000338846	0.0079724
hsa-miR-138-5p	31.1909	26.5533	282.545	610.115	668.035	4456.38	4739.19	969.137	1397.23	8.93004	3.15867	0.000345067	0.00802855
hsa-miR-424-3p	56.0152	65.7535	4.06514	11.1484	18.6102	493.798	465.705	202.676	239.468	11.2547	3.49246	0.000390663	0.00895736
hsa-miR-411-5p	1687.42	1894.99	3.92124	10.587	23.4383	5368.21	8181.42	12799.6	14264.8	14.0226	3.80968	0.000393542	0.00895736
hsa-miR-651-5p	9.82117	7.18933	2.5542	5.85492	6.67157	93.2464	71.4245	9.84111	8.26616	7.11287	2.83043	0.000414579	0.00933471
hsa-miR-942-5p	6.11973	6.92694	1.04327	4.33104	5.35481	18.9428	22.7643	31.3049	20.4984	4.92382	2.29978	0.00043721	0.00973955
hsa-miR-296-5p	2.56634	2.99118	6.90714	5.53411	2.01903	19.906	15.0558	25.8753	15.5721	4.73381	2.243	0.000497681	0.0109699
hsa-miR-1249-5p	1.23382	0.99706	12.6271	8.90269	33.2701	1.42186	1.08401	1.27256	3.33986	-6.37809	-2.67313	0.00050771	0.0110744
hsa-miR-4778-5p	3.30663	3.14861	2.6981	2.32593	5.53038	0.64213	1.02379	1.10288	0.125245	-4.70555	-2.23436	0.000519383	0.0112122
hsa-miR-6771-3p	2.61569	1.73174	8.2382	18.6074	17.5568	0.825596	1.38513	1.61191	3.33986	-5.41194	-2.43614	0.000542289	0.0115873
hsa-miR-200a-5p	5.13267	5.51007	0.53962	0.561431	2.01903	1.65119	9.69591	50.9023	14.3614	6.92852	2.79255	0.000548197	0.0115952
hsa-miR-922	1.62864	0.944583	4.06514	0.240613	1.93124	8.53115	8.49145	12.1317	6.59623	4.98061	2.31632	0.000567002	0.0118595
hsa-miR-149-5p	529.603	528.599	20.0379	79.5628	104.024	1636.24	1880.64	2204.15	2076.89	7.72433	2.94941	0.000577684	0.0118595
hsa-miR-3529-5p	615.427	777.287	7.05104	35.0493	37.3081	2495.18	2918.71	2966.08	2500.97	9.23868	3.20769	0.000574129	0.0118595
hsa-miR-561-3p	2.07281	3.20109	11.9796	16.4419	8.6906	1.78879	1.14424	1.39981	3.25637	-4.44144	-2.15103	0.000611932	0.0124406
hsa-miR-370-5p	10.216	10.8627	3.88527	1.52388	5.53038	52.6547	46.432	13.8709	20.8324	5.20611	2.38021	0.000677273	0.0136366
hsa-miR-3117-5p	0.345468	0.419815	0.215848	3.6894	1.40454	0.183466	0.060223	0.169674	0.0834966	-9.16234	-3.19572	0.000717063	0.0143003
hsa-miR-141-3p	4.6885	3.98824	5.18035	13.8754	21.5948	2.29332	2.77026	2.5027	1.96217	-4.1202	-2.04271	0.00077099	0.0147498
hsa-miR-136-5p	6.26778	3.98824	2.23043	3.12797	3.86249	1.97226	3.85427	28.2083	56.2767	5.78633	2.53265	0.000771896	0.0147498
hsa-miR-5002-3p	1.28317	1.31192	3.52552	6.89758	5.53038	0.871462	1.32491	0.169674	0.667973	-4.88859	-2.28942	0.000767384	0.0147498
hsa-miR-3619-3p	1.28317	2.15155	4.24501	4.81227	3.95027	0.687996	0.843122	0.254511	1.16895	-4.42073	-2.14428	0.000774824	0.0147498
hsa-miR-511-5p	2.36893	1.78421	13.4545	11.389	24.2283	1.33013	1.44535	3.648	1.79518	-5.15586	-2.36621	0.000759292	0.0147498
hsa-miR-5589-3p	0.838995	1.04954	4.10111	11.2286	0.438919	1.00906	0.361338	0.381767	0.375735	-6.56661	-2.71515	0.000801748	0.0149898
hsa-miR-1294	3.15857	3.98824	0.323772	4.65186	1.40454	14.1269	12.4662	11.3258	15.0294	4.89841	2.29231	0.000797467	0.0149898
hsa-miR-3605-3p	8.4393	13.7489	4.24501	7.77983	4.91589	53.9848	25.8357	43.6911	29.6413	4.88394	2.28804	0.000831169	0.0154024
hsa-miR-568	0.74029	0.892106	6.54739	0.0802044	1.22897	0.550397	0.240892	0.169674	0.0834966	-7.23828	-2.85565	0.00088383	0.0162346
hsa-miR-548b-3p	0.888347	1.20697	3.2737	5.05288	4.74033	0.321065	0.361338	0.381767	1.33595	-4.94784	-2.3068	0.000965725	0.0173346
hsa-miR-5583-3p	2.36893	1.83669	1.58289	3.12797	5.00368	0.825596	0.662453	0.805953	0.125245	-4.54048	-2.18284	0.000956027	0.0173346
hsa-miR-4682	1.08576	1.10201	1.72678	0.160409	0.965622	10.2282	5.72119	3.56316	1.00196	4.97251	2.31397	0.000981218	0.0173346
hsa-miR-6846-3p	2.8131	2.88623	34.6436	65.7676	59.4296	1.05493	1.08401	5.72651	11.272	-6.90607	-2.78786	0.000988035	0.0173346
hsa-miR-3189-5p	6.76131	6.24474	1.18716	4.81227	3.86249	29.4462	29.3286	14.6768	14.4867	4.80405	2.26425	0.00100166	0.0173346
hsa-miR-542-3p	1.67799	1.67926	4.28099	15.5597	11.4997	1.10079	2.46914	0.212093	0.793218	-6.06851	-2.60134	0.000999075	0.0173346
hsa-miR-6818-3p	1.8754	1.78421	18.6709	19.1689	24.0528	2.29332	2.40892	1.10288	3.7991	-5.44615	-2.44524	0.000979603	0.0173346
hsa-miR-5196-3p	2.61569	2.36146	2.66213	5.21329	7.90054	52.3336	22.5836	5.00539	6.63798	5.2271	2.38601	0.00102297	0.0175582
hsa-miR-572	1.43123	1.46935	8.45405	10.2662	8.42725	1.14666	1.08401	2.16335	0.626224	-4.75898	-2.25065	0.00105579	0.0179741
hsa-miR-142-3p	17.8163	14.746	4.10111	5.77472	7.98833	154.203	123.337	41.5702	17.9935	8.34452	3.06083	0.00106995	0.0180683
hsa-miR-4315	1.38187	1.41687	1.25911	5.4539	2.45795	12.4298	10.0572	7.59292	7.51469	3.98797	1.99565	0.00113188	0.0188145
hsa-miR-5581-3p	4.93526	5.87741	3.02187	5.85492	7.54941	13.6682	20.1145	33.8076	17.6178	3.93882	1.97776	0.00113211	0.0188145
hsa-miR-5089-3p	0.296116	0.472292	3.84929	4.41124	1.93124	0.504531	0.180669	0.0424186	0.459231	-7.24136	-2.85626	0.00118181	0.0194859
hsa-miR-3692-3p	0.641584	0.629722	2.62615	10.9078	4.21362	0.321065	0.722676	1.23014	0.125245	-6.28184	-2.65119	0.00120464	0.0197071
hsa-miR-3675-3p	0.838995	0.682199	1.83471	3.529	3.86249	0.550397	0.240892	0.29693	0.292238	-6.03416	-2.59315	0.00122367	0.0198634
hsa-miR-4528	0.345468	0.104954	0.863392	1.8447	10.5341	0.0917328	0.180669	0.763534	0.0834966	-9.53554	-3.25331	0.00127235	0.0204947
hsa-miR-101-3p	2.31957	3.09613	9.82109	36.0118	38.5371	2.20159	3.55316	6.36279	2.17091	-5.0149	-2.32622	0.00142365	0.0225843
hsa-miR-3159	2.76375	3.04366	2.05056	7.37881	10.6218	2.10986	1.44535	0.678697	0.125245	-4.72794	-2.24121	0.00141731	0.0225843
hsa-miR-6835-3p	6.61325	8.18639	22.6641	47.8018	14.7477	4.49491	6.56431	0.127256	3.17287	-5.57213	-2.47823	0.0014785	0.023061
hsa-miR-605-5p	5.13267	6.76951	1.25911	1.28327	6.23265	18.8052	16.9829	18.0703	16.5741	4.25844	2.09032	0.00149776	0.023061
hsa-miR-490-3p	3.25727	2.46641	9.20952	3.12797	1.05341	26.2815	26.0766	13.6588	5.71952	4.64744	2.21644	0.00149033	0.023061
hsa-miR-675-3p	2.17152	1.3644	13.1667	14.6774	15.7133	1.37599	1.74647	3.09656	2.46315	-4.32111	-2.1114	0.00148665	0.023061
hsa-miR-1249-3p	2.17152	2.09907	16.4404	42.2677	46.7888	2.88958	1.68624	3.13897	7.68169	-5.6882	-2.50797	0.00153982	0.0235356
hsa-miR-1537-3p	5.42879	5.35264	21.6568	27.8309	14.1332	2.88958	4.39628	4.32669	2.46315	-4.22557	-2.07915	0.00158211	0.0238341
hsa-miR-4450	32.8689	31.9059	5.57608	6.09554	12.6409	120.078	164.951	99.5988	80.5325	6.51909	2.70467	0.00158103	0.0238341
hsa-miR-6793-5p	5.08332	5.19521	2.08653	2.80716	2.37016	33.0697	14.2126	3.94493	10.6041	4.38731	2.13334	0.00159722	0.0238899
hsa-miR-616-3p	1.08576	0.787153	11.332	0	2.01903	0.366931	0.963568	0.127256	0	-8.37148	-3.06548	0.00161606	0.0240002
hsa-miR-3151-3p	1.62864	1.88917	4.42489	4.89247	4.12584	4.67838	4.99851	19.5125	29.683	4.34347	2.11885	0.00167546	0.0247071
hsa-miR-223-3p	0.444174	0.892106	0.503646	3.04777	9.12952	0.687996	0.662453	0.0848371	0.0417483	-7.53348	-2.91332	0.00168843	0.0247242
hsa-miR-5094	3.01051	2.41393	0.827418	0.240613	1.14119	9.76955	5.42007	6.82939	4.30007	4.2458	2.08604	0.00173983	0.0251255
hsa-miR-486-5p	1.62864	1.78421	9.17355	17.244	41.6973	1.42186	1.86691	2.71479	4.80105	-5.27627	-2.39952	0.00173325	0.0251255
hsa-miR-382-5p	83.0111	93.8811	5.2523	2.40613	6.75935	231.717	242.277	473.222	541.475	9.72267	3.28135	0.00175363	0.0251514
hsa-miR-466	0.9377	1.04954	6.18765	25.906	7.19827	0.733863	2.16803	2.20577	0.208741	-6.19577	-2.63128	0.00179493	0.0253958
hsa-miR-4666a-5p	2.17152	2.15155	4.71268	12.9931	5.09146	1.00906	1.5658	1.824	0.25049	-4.64978	-2.21716	0.00178302	0.0253958
hsa-miR-4440	6.86002	8.34382	3.56149	5.4539	4.21362	45.4078	39.2654	11.453	7.76518	4.55704	2.1881	0.00182783	0.0256878
hsa-miR-151a-3p	134.486	169.343	935.126	2146.59	1345.29	97.9707	187.715	83.7767	139.314	-7.43857	-2.89502	0.00185503	0.0258963
hsa-miR-6830-3p	29.2168	16.3728	5.21633	3.36859	8.25168	2.24745	3.01115	3.94493	2.17091	-4.39153	-2.13472	0.00187931	0.0260614
hsa-miR-648	1.13511	0.734676	5.684	4.33104	7.46162	1.42186	1.02379	0.0848371	0.0834966	-5.91241	-2.56375	0.00189846	0.0261537
hsa-miR-1324	1.57928	1.31192	3.05785	8.18085	6.23265	1.74292	1.08401	0.29693	0.292238	-4.74701	-2.24702	0.00192156	0.026299
hsa-miR-548a-5p	11.1043	10.9677	0.107924	3.36859	2.7213	30.0884	46.432	26.5964	24.7567	5.64183	2.49616	0.00198589	0.0266567
hsa-miR-495-5p	20.5307	23.1948	6.1157	4.17063	6.05708	85.5867	113.46	56.2046	65.9206	6.6672	2.73708	0.00198565	0.0266567
hsa-miR-301a-5p	7.00807	7.76657	36.2625	89.1873	73.6506	9.12742	3.73383	6.32037	13.6099	-5.21026	-2.38136	0.00197442	0.0266567
hsa-miR-6747-5p	409.923	350.073	28.9596	27.5903	43.1019	856.418	530.324	2055.09	1219.13	6.77674	2.76059	0.00200811	0.0267834
hsa-miR-7151-3p	0.987053	1.04954	4.85658	4.97268	3.95027	0.779729	1.44535	0.127256	0.125245	-5.14659	-2.36362	0.00202306	0.0268119
hsa-miR-6878-5p	3.50404	3.77833	7.26689	7.45901	9.65622	2.61439	2.10781	1.39981	1.37769	-3.36525	-1.75071	0.00209361	0.0275724
hsa-miR-629-3p	4.24433	4.93282	1.69081	1.52388	5.61816	13.8517	13.6104	18.9187	8.43316	3.81129	1.93028	0.00212564	0.0278193
hsa-miR-379-3p	119.483	171.075	0.719494	3.93002	1.66789	660.477	811.867	520.349	417.984	10.1479	3.3431	0.00223605	0.0287876
hsa-miR-149-3p	3.05986	2.20403	7.66261	26.7081	9.12952	1.05493	1.86691	1.90884	4.38357	-4.21399	-2.07519	0.00224087	0.0287876
hsa-miR-943	3.25727	2.99118	5.2523	15.1586	10.6218	1.60532	2.52937	2.84204	1.71168	-3.41286	-1.77098	0.00223531	0.0287876
hsa-miR-328-3p	87.3048	86.8492	984.663	1138.58	1417.09	73.1569	124.963	102.695	120.235	-7.05723	-2.8191	0.00230482	0.0294287
hsa-miR-4714-5p	24.3308	16.3203	6.69129	3.04777	8.25168	88.2929	204.698	27.063	21.9596	7.27862	2.86366	0.00248406	0.0315249
hsa-miR-340-3p	48.5136	54.8383	651.502	1212.77	1373.47	36.4179	60.1026	127.383	106.667	-8.08484	-3.01522	0.00259287	0.0323183
hsa-miR-146a-3p	5.87296	6.97942	3.77734	9.86515	1.31676	56.2322	47.6364	7.97469	4.75931	5.23243	2.38748	0.00258605	0.0323183
hsa-miR-6516-5p	5.03397	3.41099	22.3403	10.988	1.75568	3.11892	1.74647	0.381767	2.54665	-4.4684	-2.15976	0.0025785	0.0323183
hsa-miR-193a-3p	123.875	148.719	50.9042	97.8494	86.2915	397.433	462.633	581.474	946.601	5.8803	2.55589	0.0028749	0.0356215
hsa-miR-4764-3p	3.05986	4.46053	6.90714	6.49656	8.07611	2.52265	1.26468	1.73916	0.375735	-3.91394	-1.96862	0.00299163	0.0368498
hsa-miR-450a-1-3p	3.6521	7.08437	37.7734	45.6363	32.3922	4.86184	7.28699	6.87181	3.38161	-4.51621	-2.17511	0.00308595	0.0377893
hsa-miR-132-3p	43.9238	61.083	27.6286	8.50167	28.3542	227.543	261.428	165.305	183.066	6.16959	2.62517	0.00315232	0.0383776
hsa-miR-1247-5p	10.9563	9.13097	5.89985	0.160409	1.14119	79.9452	47.3955	2.58753	6.0535	6.20906	2.63437	0.00322496	0.0384798
hsa-miR-6730-5p	7.74836	6.87447	4.64073	2.96756	0.526703	63.3415	38.9041	2.24818	2.67189	5.86448	2.552	0.00318926	0.0384798
hsa-miR-767-5p	9.377	10.7053	5.50413	10.8276	13.0798	3.71518	5.05873	1.27256	1.50294	-3.4402	-1.78249	0.00323421	0.0384798
hsa-miR-3677-3p	2.46763	1.78421	3.56149	6.41636	2.89687	15.9615	7.28699	17.3068	8.43316	3.5943	1.84571	0.00322926	0.0384798
hsa-miR-586	1.57928	1.62678	2.51823	1.68429	4.21362	1.05493	0.60223	0	0.166993	-5.08985	-2.34762	0.00333137	0.0394118
hsa-miR-4711-3p	4.54044	4.51301	9.85706	12.2713	11.8508	2.01812	1.44535	0.933208	5.46903	-3.46838	-1.79426	0.00339422	0.0399298
hsa-miR-542-5p	70.7223	79.5024	8.49003	17.244	9.39287	309.369	409.035	192.665	167.536	7.26995	2.86195	0.00343394	0.0401714
hsa-miR-3146	1.43123	1.15449	1.47496	12.9129	3.59914	0.412798	0.361338	1.1453	1.75343	-4.41904	-2.14373	0.00352811	0.0401817
hsa-miR-6715a-3p	8.53801	9.39336	0.359747	0.802044	3.59914	31.0057	21.3792	13.9133	17.4925	4.60252	2.20243	0.0034957	0.0401817
hsa-miR-1915-5p	3.10922	2.62384	15.0014	36.6534	32.3922	2.56852	1.92714	2.67237	8.30791	-4.62712	-2.21012	0.00347493	0.0401817
hsa-miR-147b-5p	3.70145	2.30898	29.2114	54.6192	15.1866	6.8341	2.95093	3.81767	4.9263	-4.52742	-2.17869	0.00347919	0.0401817
hsa-miR-340-5p	52.8073	60.9781	63.7471	167.146	263.79	9.81541	17.826	19.8943	29.9753	-6.27569	-2.64978	0.00353077	0.0401817
hsa-miR-323b-5p	27.1933	24.6641	4.53281	6.57676	5.00368	60.1767	68.4736	108.761	94.2677	6.08905	2.60622	0.0035991	0.040738
hsa-miR-365a-5p	4.14562	6.40218	7.59066	20.2115	58.2007	4.44904	5.66096	5.04781	0.166993	-5.03409	-2.33173	0.00385113	0.0433562
hsa-miR-877-3p	2.27022	2.46641	36.3344	56.7045	44.0675	3.25652	3.1316	6.4052	10.3118	-4.90361	-2.29384	0.0039496	0.0437591
hsa-miR-3144-5p	1.13511	0.892106	1.76276	0.882249	8.95395	0.871462	0.782899	0.466604	0.166993	-4.72303	-2.23971	0.00393998	0.0437591
hsa-miR-6739-3p	3.10922	2.78127	91.9513	15.3993	22.0337	1.74292	2.28848	4.70846	9.89435	-5.80147	-2.53642	0.00391794	0.0437591
hsa-miR-4772-3p	1.57928	1.25944	3.34565	11.2286	12.992	1.19253	1.68624	0.636279	2.21266	-4.22043	-2.07739	0.00418057	0.0460743
hsa-miR-633	1.82605	1.10201	4.92853	1.20307	2.37016	0.871462	1.02379	0.169674	0	-4.47733	-2.16264	0.00421427	0.0462025
hsa-miR-4460	19.0501	14.2212	5.8279	8.58188	8.07611	116.18	95.1524	11.0712	24.6315	5.53132	2.46762	0.00428731	0.0467585
hsa-miR-541-3p	44.0719	43.5033	2.80603	6.81738	5.35481	97.2368	86.6007	119.663	192.668	6.04237	2.59512	0.0043238	0.0469121
hsa-miR-4289	17.1747	17.4223	5.43218	8.02044	1.58011	72.2396	68.6543	26.554	28.8063	4.93135	2.30198	0.00452304	0.0488209
hsa-miR-1255b-2-3p	2.02346	3.41099	2.12251	0	8.51503	17.2458	2.52937	35.4619	11.3973	5.18274	2.37372	0.00459835	0.0493792
hsa-miR-2115-3p	4.14562	2.7288	0.935342	3.20818	4.74033	16.6495	13.1888	10.5622	3.29812	3.47973	1.79898	0.00475514	0.0502892
hsa-miR-6834-3p	1.23382	1.73174	2.37433	0.0802044	1.14119	7.56796	5.35985	2.67237	5.51078	3.92255	1.97179	0.00472043	0.0502892
hsa-miR-642b-5p	1.33252	0.629722	5.93582	9.38392	2.1946	0.871462	0.843122	0.678697	1.37769	-4.10539	-2.03752	0.0047396	0.0502892
hsa-miR-4452	3.15857	2.67632	6.40349	4.25084	5.79373	0.733863	1.74647	2.07851	0.709721	-3.39055	-1.76152	0.00493144	0.0518917
hsa-miR-6789-3p	3.20792	2.57137	3.88527	0.401022	1.14119	3.25652	3.6736	8.69581	19.7052	3.89436	1.96139	0.00500328	0.0523844
hsa-miR-7114-5p	2.41828	2.62384	2.5542	7.86004	3.7747	1.88052	1.38513	0.127256	0.0834966	-4.42458	-2.14554	0.00507778	0.0528999
hsa-miR-599	2.41828	2.20403	28.3121	6.97779	6.40822	1.19253	1.5658	0.212093	5.05154	-4.61309	-2.20573	0.00521649	0.0540758
hsa-miR-323a-3p	79.2603	104.691	0.431696	1.36348	1.66789	241.808	282.446	528.747	351.479	9.36406	3.22713	0.00531116	0.0545175
hsa-miR-4431	210.39	151.396	371.654	49.0049	80.3222	827.522	552.727	1522.28	555.503	5.00885	2.32448	0.0053024	0.0545175
hsa-miR-500b-3p	4.39238	3.98824	2.9859	8.42147	3.51135	11.7418	56.0074	3.01172	5.97001	4.11309	2.04022	0.0053702	0.0545883
hsa-miR-4684-3p	1.13511	1.41687	20.9013	1.28327	6.05708	1.46773	0.903345	0.127256	2.46315	-4.95594	-2.30916	0.00534977	0.0545883
hsa-miR-190a-5p	2.91181	3.09613	12.2674	21.4948	15.8011	2.20159	3.31227	2.79963	4.09133	-3.57266	-1.837	0.00545701	0.0552028
hsa-miR-1265	4.6885	4.46053	2.842	1.7645	6.93492	9.76955	4.33606	31.2201	15.8644	3.70035	1.88766	0.00592993	0.0596984
hsa-miR-3976	1.72734	0.787153	1.22314	4.25084	0.175568	0.275199	0.722676	0.127256	0.208741	-4.93566	-2.30324	0.00602865	0.0604019
hsa-miR-2681-3p	1.77669	1.46935	1.11522	4.49145	8.33946	0.917328	1.08401	0.848371	0.667973	-3.86082	-1.94891	0.00606917	0.0605183
hsa-miR-194-5p	26.3543	28.5999	79.5041	42.1073	74.4407	17.154	13.9115	4.02976	10.5206	-4.4029	-2.13845	0.0062338	0.0612844
hsa-miR-6869-5p	4.5898	3.30604	6.29557	7.53922	11.8508	2.61439	2.95093	2.46028	0.166993	-3.27609	-1.71198	0.00621697	0.0612844
hsa-miR-210-3p	3.80015	4.25062	7.59066	0.240613	3.95027	19.1263	21.0178	10.0108	11.4808	3.85729	1.94759	0.00621877	0.0612844
hsa-miR-517a-3p	0.641584	0.787153	1.97861	0.320818	2.1946	0.550397	0.120446	0.169674	0.166993	-4.60467	-2.2031	0.00632811	0.0619209
hsa-miR-409-3p	209.749	254.618	4.35294	7.69963	8.86616	724.735	767	576.214	628.604	6.94469	2.79591	0.0065144	0.0634472
hsa-miR-218-2-3p	15.1513	22.4601	163.757	198.426	263.703	12.705	17.5851	28.4629	37.0725	-5.53705	-2.46912	0.0066564	0.0645301
hsa-miR-6853-3p	3.70145	3.83081	1.04327	0.481227	5.70595	9.63195	12.0446	8.82306	10.9381	3.51388	1.81307	0.00677365	0.0653642
hsa-miR-1238-5p	1.62864	2.20403	5.57608	16.2013	4.21362	1.51359	2.28848	2.16335	0.459231	-3.70526	-1.88957	0.00696247	0.0665727
hsa-miR-6751-5p	1.8754	2.41393	1.58289	1.28327	1.75568	6.0085	3.85427	1.35739	11.6895	3.19702	1.67673	0.00693135	0.0665727
hsa-miR-3909	7.10678	6.97942	54.6815	152.87	84.1847	15.1818	20.2952	7.72018	8.05742	-4.77225	-2.25467	0.00711363	0.0677088
hsa-miR-574-3p	387.862	415.459	47.8104	95.2829	121.493	1457.82	1761.46	423.465	511.959	4.86274	2.28177	0.00740642	0.0698027
hsa-miR-1283	0.444174	0.682199	2.30238	1.36348	0.175568	0.0917328	0.542007	0.0848371	0.0417483	-5.45081	-2.44647	0.00743362	0.0698027
hsa-miR-12123	2.07281	1.67926	5.14438	11.389	2.54573	0.825596	1.68624	1.99367	0.542728	-3.60818	-1.85127	0.00739356	0.0698027
hsa-miR-4275	0.690937	0.262384	0.53962	0.160409	0.263351	0.137599	0.060223	0	0.0417483	-6.60762	-2.72413	0.0075118	0.070041
hsa-miR-3612	0.838995	0.892106	9.56927	13.8754	2.54573	1.92639	0.60223	0.169674	2.12916	-4.57114	-2.19255	0.00756265	0.070041
hsa-miR-5100	11.4992	9.55079	3.23772	4.89247	2.7213	34.354	20.4156	18.8338	15.9061	3.49261	1.8043	0.00752942	0.070041
hsa-miR-487a-5p	46.9344	49.6956	8.99367	10.0256	18.8735	177.87	155.315	96.4598	100.53	4.92259	2.29942	0.0075928	0.070041
hsa-miR-452-5p	5.92232	4.88035	2.19446	0.160409	4.21362	0.825596	0.843122	1.52707	0.0417483	-4.28196	-2.09827	0.00806076	0.0728742
hsa-miR-4759	1.18446	1.57431	0.827418	6.25595	3.248	0.596264	0.301115	0.89079	0.751469	-4.01345	-2.00484	0.00799935	0.0728742
hsa-miR-4709-5p	1.72734	0.577245	10.3967	5.53411	5.53038	0.917328	1.98736	0.29693	1.46119	-4.08533	-2.03045	0.00807393	0.0728742
hsa-miR-9899	1.8754	1.88917	0.647544	0.401022	1.66789	2.75199	1.44535	5.472	8.22441	3.439	1.78199	0.008067	0.0728742
hsa-miR-2117	2.41828	1.62678	3.02187	2.24572	2.37016	0.963195	1.26468	0.551441	0.0834966	-3.33126	-1.73607	0.00806433	0.0728742
hsa-miR-548l	1.77669	2.15155	0.755468	0.240613	0.614487	3.39412	3.43271	5.00539	3.08937	3.27437	1.71122	0.00815634	0.0733021
hsa-miR-661	6.5639	5.51007	17.6636	21.8958	40.995	2.98132	3.79405	11.2409	1.66993	-3.7557	-1.90908	0.00823466	0.0736897
hsa-miR-11181-5p	4.88591	4.61796	3.59747	38.8992	2.89687	4.35731	3.07137	1.31498	2.83888	-3.78306	-1.91955	0.0083655	0.0745419
hsa-miR-6867-3p	1.43123	1.3644	6.65532	10.5068	24.4039	1.19253	1.68624	3.13897	3.21462	-3.8246	-1.93531	0.00859784	0.0762876
hsa-miR-381-5p	9.67312	10.1805	1.87068	2.16552	1.40454	30.226	28.7264	9.67143	6.17875	3.6813	1.88021	0.00872957	0.0771297
hsa-miR-10393-5p	12.0914	9.49831	8.45405	10.1058	9.2173	57.1954	28.7264	22.4394	17.1586	3.17569	1.66707	0.00881571	0.0774834
hsa-miR-582-5p	93.2765	106.528	25.5061	56.5441	75.4063	6.23783	14.3331	28.7174	12.3992	-4.63083	-2.21127	0.00884362	0.0774834
hsa-miR-3648	10.7095	7.66162	5.07243	1.04266	12.5531	34.2622	20.1747	36.989	21.6256	3.81356	1.93114	0.00909868	0.079386
hsa-miR-148b-5p	4.5898	3.25356	2.19446	5.29349	2.54573	10.3199	28.7866	5.38716	2.96413	3.3114	1.72744	0.00927325	0.0805734
hsa-miR-4737	1.62864	2.83375	1.54691	3.84981	2.80908	1.14666	1.44535	0.212093	0.292238	-3.29634	-1.72086	0.0095533	0.0826637
hsa-miR-6090	4.04692	3.30604	4.67671	3.6894	2.28238	4.58664	3.25204	9.84111	29.516	3.2654	1.70726	0.00972233	0.0837801
hsa-miR-7854-3p	1.82605	1.25944	1.33106	0.882249	3.248	3.11892	3.25204	4.15702	10.2701	3.06856	1.61756	0.00996943	0.0855573
hsa-miR-570-3p	1.57928	1.67926	35.7948	57.667	5.09146	2.20159	3.31227	4.87814	8.34966	-4.34052	-2.11787	0.0103828	0.0883808
hsa-miR-7855-5p	163.259	105.269	33.5644	33.2046	24.3161	189.887	147.426	765.316	393.185	5.19791	2.37793	0.0103435	0.0883808
hsa-miR-604	2.22087	2.78127	4.31696	3.6092	2.98465	18.7135	11.8639	2.41786	6.80497	3.11484	1.63916	0.0104602	0.0886788
hsa-miR-6089	3.10922	2.62384	6.76324	23.0989	5.17924	4.08211	2.28848	1.23014	1.83693	-3.44564	-1.78477	0.0108024	0.0904811
hsa-miR-197-3p	59.6673	76.0389	1.97861	2.80716	2.98465	73.1111	94.3093	214.468	302.049	5.95552	2.57423	0.0107476	0.0904811
hsa-miR-507	6.31714	5.51007	4.28099	9.0631	4.12584	28.0244	16.9829	12.5135	14.1944	3.06598	1.61635	0.0107897	0.0904811
hsa-miR-1306-5p	7.74836	8.76363	19.7861	45.7165	95.5966	6.0085	4.4565	14.8041	11.8565	-3.82103	-1.93396	0.0110118	0.0918672
hsa-miR-6720-3p	5.03397	4.56549	3.2737	10.988	10.0074	33.4825	17.1636	13.0649	19.7887	3.10197	1.63319	0.011172	0.0928336
hsa-miR-3682-3p	1.82605	1.25944	2.80603	4.41124	1.75568	0.458664	0.361338	0.381767	1.71168	-3.25107	-1.70091	0.0113364	0.093828
hsa-miR-4313	1.18446	0.99706	7.26689	0.240613	0.438919	4.54078	3.25204	9.84111	12.9837	3.72583	1.89756	0.0113936	0.0939301
hsa-miR-1263	7.25484	8.65868	9.78511	10.1058	15.6255	3.66931	3.49294	5.55683	1.66993	-2.84723	-1.50956	0.0115092	0.0945106
hsa-miR-548ag	1.57928	1.94164	0.863392	7.2986	0.790054	0.64213	0.60223	1.10288	0.208741	-3.85806	-1.94788	0.0118722	0.095823
hsa-miR-1277-5p	0.690937	0.892106	1.58289	2.88736	0.70227	0.779729	0.361338	0.0848371	0.0834966	-4.11084	-2.03943	0.0122065	0.095823
hsa-miR-1471	10.1173	9.23592	3.52552	6.97779	4.12584	19.4932	11.8037	26.6389	19.2877	2.83589	1.5038	0.0121882	0.095823
hsa-miR-1266-3p	6.71196	6.08731	1.11522	8.90269	8.33946	71.1388	36.194	1.73916	3.00588	4.49642	2.16878	0.0121009	0.095823
hsa-miR-20b-3p	7.05743	7.55667	6.54739	3.36859	1.05341	16.9706	21.0781	12.3014	13.3595	3.08359	1.62461	0.0119305	0.095823
hsa-miR-6837-3p	13.0784	11.9647	2.87797	7.53922	17.9957	54.9938	29.9911	26.3843	26.3014	3.22466	1.68915	0.0120163	0.095823
hsa-miR-4454	9.47571	10.1805	8.05833	4.97268	16.7667	67.1943	48.7807	10.2653	11.439	3.47947	1.79887	0.0119992	0.095823
hsa-miR-6806-5p	1.62864	1.67926	1.54691	2.00511	1.58011	6.74236	4.27584	2.07851	7.3477	3.03121	1.59989	0.0117336	0.095823
hsa-miR-1296-5p	19.4449	26.1335	2.30238	6.09554	0.614487	48.2973	144.656	15.1434	20.0392	5.21617	2.38299	0.0118407	0.095823
hsa-miR-6715b-3p	1.82605	1.88917	2.05056	0.561431	0.614487	10.641	7.16654	2.79963	0.375735	3.71847	1.89471	0.0122181	0.095823
hsa-miR-452-3p	1.72734	1.3644	1.25911	3.529	4.03806	1.33013	0.782899	0.169674	0.166993	-3.86752	-1.95141	0.0120604	0.095823
hsa-miR-30c-1-3p	22.8009	24.7691	34.6076	91.9945	135.714	19.3556	13.6706	12.0045	16.5323	-4.02298	-2.00826	0.0121656	0.095823
hsa-miR-3120-5p	585.668	482.997	132.207	125.921	155.114	1745.49	728.036	1165.96	1260.72	4.13301	2.04719	0.0123833	0.0966882
hsa-miR-758-3p	13.7694	17.4748	15.0374	0.240613	1.58011	58.2962	74.9777	13.8285	28.4723	4.55166	2.18639	0.0124208	0.0966882
hsa-miR-4637	0.9377	0.787153	0.647544	2.24572	2.10681	0.550397	0.542007	0.212093	0.0834966	-3.83319	-1.93854	0.0125619	0.0969819
hsa-miR-3127-3p	10.1173	11.7023	2.23043	13.3941	5.53038	2.43092	1.5658	5.472	1.92042	-3.00525	-1.58748	0.0125975	0.0969819
hsa-miR-6728-5p	20.2839	55.1532	11.1162	15.6399	30.9877	169.201	162.361	51.4961	79.9897	4.34511	2.11939	0.0125812	0.0969819
hsa-miR-4716-3p	5.67555	5.82493	1.47496	4.33104	1.66789	2.38505	1.08401	0.636279	0.125245	-3.58984	-1.84392	0.0130806	0.100333
hsa-miR-6791-3p	4.19497	2.9387	24.6786	34.5681	37.8348	2.98132	4.15539	9.79869	6.93022	-3.48702	-1.80199	0.0131388	0.100411
hsa-miR-1538	11.6472	10.5478	8.8138	19.5699	12.8164	53.1133	46.3115	29.3536	28.8481	3.11873	1.64096	0.0135407	0.103106
hsa-miR-5700	1.28317	2.20403	1.69081	5.69452	0.438919	1.00906	0.662453	0.466604	0.292238	-3.70348	-1.88888	0.0136502	0.103564
hsa-miR-433-5p	7.64966	3.67338	6.69129	4.97268	0.351135	5.68744	8.25055	14.9738	36.321	3.47929	1.79879	0.0137472	0.103923
hsa-miR-6767-3p	2.22087	2.7288	0.179873	0.0802044	1.75568	2.29332	2.28848	11.4954	4.9263	3.75036	1.90703	0.0141567	0.106251
hsa-miR-567	3.25727	4.09319	3.52552	5.77472	11.5875	0.825596	1.32491	3.47832	2.12916	-2.87811	-1.52512	0.0141189	0.106251
hsa-miR-4712-5p	6.02102	6.82199	0.359747	0.320818	0.70227	20.273	16.6216	1.1453	8.72539	4.08745	2.0312	0.0144554	0.108106
hsa-miR-1185-5p	27.4894	32.6931	1.36704	7.69963	0.614487	51.8291	81.4818	70.0755	79.614	5.05787	2.33853	0.0146554	0.10902
hsa-miR-3945	0.9377	0.367338	0.683519	4.25084	0.70227	0.596264	0.301115	0.169674	0.292238	-3.99478	-1.99811	0.0146817	0.10902
hsa-miR-4760-3p	1.62864	2.67632	2.73408	2.56654	0.70227	1.46773	0.662453	0.212093	0.125245	-3.36407	-1.75021	0.0148206	0.109276
hsa-miR-4677-5p	3.89886	4.72292	23.3116	25.8258	9.39287	1.46773	2.28848	7.16874	5.34378	-3.29494	-1.72025	0.0147937	0.109276
hsa-miR-552-3p	4.6885	4.46053	6.90714	7.2184	5.35481	3.48585	2.89071	1.06046	0.125245	-3.03633	-1.60233	0.0149379	0.109754
hsa-miR-4433b-5p	0.542879	0.419815	2.01458	0.561431	0.438919	8.02662	2.16803	0.636279	1.1272	3.65792	1.87102	0.0150573	0.110244
hsa-miR-6755-5p	1.08576	1.88917	2.30238	2.80716	3.86249	1.19253	0.903345	0.551441	0.584476	-2.9166	-1.54429	0.0151108	0.110251
hsa-miR-302f	3.6521	2.7288	2.62615	4.09043	0.965622	1.19253	1.38513	1.06046	0.166993	-2.98231	-1.57643	0.0153036	0.110623
hsa-miR-3917	7.45225	8.02896	1.65484	0.401022	7.90054	3.71518	3.01115	35.5468	37.6152	3.92179	1.97151	0.0153166	0.110623
hsa-miR-378a-3p	572.343	707.808	985.742	1419.94	960.53	315.378	332.19	163.354	104.538	-4.0605	-2.02166	0.0153203	0.110623
hsa-miR-191-3p	10.3641	11.0726	2.01458	0.0802044	5.70595	7.56796	5.66096	30.499	50.7659	4.03299	2.01185	0.0159708	0.114658
hsa-miR-4650-3p	8.24189	6.92694	1.11522	10.3464	2.37016	14.5397	11.623	19.3004	26.8024	3.11629	1.63983	0.0159887	0.114658
hsa-miR-652-5p	2.31957	2.78127	8.70587	13.7952	26.5107	2.43092	3.97472	3.73283	3.7991	-3.0958	-1.63031	0.0161914	0.114932
hsa-miR-4511	3.10922	2.30898	0.971317	6.17574	6.23265	1.28426	1.14424	1.52707	0.876714	-3.06765	-1.61713	0.0161477	0.114932
hsa-miR-4679	8.4393	8.44877	10.9723	6.65697	9.30508	52.6547	32.6409	8.73822	15.5721	3.12013	1.64161	0.016133	0.114932
hsa-miR-6759-3p	0.296116	0.472292	0.359747	0.0802044	0.438919	0.504531	0.421561	1.90884	2.12916	3.67653	1.87834	0.0165479	0.117012
hsa-let-7d-3p	53.0541	64.1267	453.893	1053.73	1737.59	62.7911	95.8751	172.304	180.478	-5.25902	-2.3948	0.0165963	0.117012
hsa-miR-668-5p	3.05986	4.93282	13.7783	19.1689	15.5377	3.43998	2.46914	4.66604	4.63406	-2.95767	-1.56446	0.0166619	0.11708
hsa-miR-4258	4.24433	3.51595	0.863392	3.93002	3.07243	10.0447	7.22676	11.0712	6.34574	2.79	1.48026	0.0168368	0.117914
hsa-miR-1911-3p	2.41828	3.14861	1.58289	2.72695	1.14119	3.80691	2.95093	10.944	5.97001	2.67792	1.42111	0.0169763	0.118494
hsa-miR-7846-3p	2.12216	2.0466	0.287797	0.320818	0.790054	3.71518	3.07137	3.86009	3.67385	3.16656	1.66292	0.0175844	0.122331
hsa-miR-1287-5p	25.5647	16.7926	1.61886	3.20818	11.8508	40.2707	51.852	42.9276	30.3093	3.49779	1.80644	0.0182142	0.126293
hsa-miR-4646-3p	3.55339	4.46053	22.3043	13.3139	2.45795	5.82504	2.04758	0.551441	2.83888	-3.27429	-1.71118	0.0182888	0.126392
hsa-miR-1843	8.83412	10.7053	26.6213	36.2524	21.5948	9.67782	9.09368	6.10827	5.13504	-2.77104	-1.47043	0.0191451	0.131874
hsa-miR-1587	4.34303	5.56255	4.31696	8.42147	10.4463	15.9615	15.9591	16.9674	22.7111	2.7394	1.45386	0.0193799	0.133054
hsa-miR-7113-5p	2.27022	3.93576	2.15848	2.56654	7.0227	12.5674	12.1651	8.48371	5.17679	2.69513	1.43035	0.0196699	0.134604
hsa-miR-320e	16.3357	18.8917	15.3252	12.5921	10.973	36.5555	44.1435	69.6089	48.0105	3.33087	1.7359	0.0199503	0.135387
hsa-miR-34a-3p	11.2524	11.9122	1.11522	4.73206	2.01903	49.7192	31.2558	7.46567	3.38161	3.69101	1.88402	0.0199407	0.135387
hsa-miR-1-5p	0.838995	0.682199	3.81332	0	4.30141	0.275199	0.542007	0.848371	0.0834966	-4.38128	-2.13135	0.0199783	0.135387
hsa-miR-4683	3.55339	2.83375	0.755468	0.481227	4.03806	14.1727	12.1048	1.06046	2.21266	3.16095	1.66036	0.0200851	0.135672
hsa-miR-1250-3p	0.888347	0.892106	1.15119	0	4.21362	0.596264	0.240892	0.169674	0.375735	-4.05295	-2.01897	0.0207373	0.139627
hsa-miR-651-3p	1.62864	2.62384	4.17306	9.30372	3.16022	1.23839	2.52937	0.933208	1.08546	-2.89197	-1.53205	0.0211194	0.14145
hsa-miR-196a-5p	978.613	1232.1	559.838	1124.31	1154.71	158.881	141.283	382.319	442.824	-3.58948	-1.84377	0.0212782	0.14145
hsa-miR-4433a-3p	5.13267	6.08731	5.14438	10.587	0.438919	16.1908	21.0178	15.7797	12.5662	2.98573	1.57808	0.0212541	0.14145
hsa-miR-378g	3.70145	2.7288	12.3753	14.3566	24.755	2.66025	2.71004	6.78697	3.50686	-2.94681	-1.55915	0.0211729	0.14145
hsa-miR-6859-3p	0.838995	0.83963	4.35294	1.68429	9.91957	1.05493	1.38513	0.127256	1.54469	-3.41535	-1.77203	0.0214752	0.142307
hsa-miR-4463	3.15857	1.73174	1.07924	11.389	3.33578	1.55946	1.08401	1.52707	1.2942	-2.99819	-1.58409	0.0217397	0.143605
hsa-miR-668-3p	6.07037	7.55667	2.48225	0	0.175568	10.9621	11.5628	13.7436	13.0672	3.76648	1.91322	0.0220097	0.144931
hsa-miR-504-3p	1.8754	1.46935	0.53962	0.240613	0.438919	2.66025	1.38513	2.37544	4.25833	2.85257	1.51226	0.0223165	0.146492
hsa-miR-876-3p	77.0888	95.4029	5.28828	6.09554	6.67157	767.345	168.865	10.0108	8.89239	6.26353	2.64698	0.0224607	0.146977
hsa-miR-9900	11.9927	16.0579	35.7948	93.6788	129.306	31.4644	18.91	2.41786	8.5584	-3.73886	-1.9026	0.0233085	0.151297
hsa-miR-3927-5p	1.33252	1.15449	0.827418	2.64675	2.28238	0.64213	0.421561	0.763534	0.0417483	-3.4508	-1.78693	0.0233863	0.151297
hsa-miR-3194-3p	1.57928	1.3644	2.23043	8.26106	8.42725	1.28426	1.92714	1.18772	1.54469	-2.91806	-1.54501	0.0231984	0.151297
hsa-miR-485-3p	28.7726	39.4626	2.19446	3.04777	7.11049	55.7277	55.0438	60.3616	105.039	4.27934	2.09739	0.0234099	0.151297
hsa-miR-323b-3p	44.7135	59.981	0.863392	2.48634	0.614487	97.2368	107.92	116.566	115.434	5.02568	2.32932	0.0237049	0.152628
hsa-miR-549a-3p	2.96116	1.3644	2.23043	0.240613	26.2474	0.275199	1.38513	0.933208	3.67385	-4.19716	-2.06941	0.0237921	0.152628
hsa-miR-3672	1.67799	1.57431	7.87846	7.61942	12.1142	1.60532	1.74647	3.73283	1.2942	-2.9314	-1.55159	0.0238345	0.152628
hsa-miR-3186-3p	2.96116	2.36146	27.3048	78.3597	48.0177	15.7322	9.63568	5.38716	4.21658	-3.63501	-1.86196	0.0240115	0.153293
hsa-miR-6800-3p	1.33252	0.99706	1.33106	2.80716	4.30141	0.917328	0.963568	0.339349	0.333986	-3.34267	-1.741	0.0242509	0.154258
hsa-miR-4757-3p	2.71439	2.83375	4.85658	2.08532	8.07611	2.15572	1.26468	1.1453	1.54469	-2.67061	-1.41717	0.02431	0.154258
hsa-miR-4265	10.6602	13.2242	2.30238	10.587	6.75935	29.859	31.6171	22.4818	17.7848	2.92188	1.5469	0.0245779	0.155487
hsa-miR-1827	61.9869	64.6515	702.118	554.052	364.039	118.014	87.6245	47.8481	53.4378	-4.55308	-2.18684	0.0247877	0.156342
hsa-miR-6131	1147.55	986.355	63.963	194.416	62.0632	2979.85	2000.01	1473.83	1151.5	3.87319	1.95352	0.0249172	0.156687
hsa-miR-658	1.23382	1.73174	3.95722	2.00511	2.28238	0.825596	1.08401	0.551441	0.960211	-2.66495	-1.41411	0.0250071	0.156781
hsa-miR-3646	1.82605	1.88917	1.40301	9.54433	2.80908	0.871462	0.843122	0.29693	2.63014	-2.9797	-1.57517	0.0253937	0.15873
hsa-miR-29c-5p	115.831	117.811	209.804	331.084	221.215	38.7113	35.3509	87.0429	52.5194	-3.72732	-1.89814	0.0259829	0.160024
hsa-miR-383-5p	36.9651	40.5646	20.3976	24.7832	39.1516	96.6406	103.584	156.567	101.407	3.54052	1.82396	0.0257552	0.160024
hsa-miR-3175	2.41828	3.41099	1.15119	0.320818	0.526703	6.05437	2.71004	2.92688	6.42924	2.84671	1.5093	0.0256973	0.160024
hsa-miR-193b-5p	5.92232	8.97354	1.47496	8.50167	7.90054	12.8885	20.7167	10.6046	27.0946	2.72674	1.44718	0.025883	0.160024
hsa-miR-6755-3p	4.73785	3.41099	40.9032	26.0664	39.0638	4.31144	3.07137	8.56855	12.3992	-3.21755	-1.68596	0.0259341	0.160024
hsa-miR-4724-3p	0.74029	0.944583	5.43218	9.86515	5.17924	0.412798	0.60223	0.212093	3.7156	-3.56171	-1.83257	0.0265516	0.163047
hsa-miR-331-3p	37.7548	48.1213	43.1336	88.7863	41.9607	8.71462	22.4632	11.9196	20.5402	-3.26551	-1.70731	0.0266617	0.163244
hsa-miR-654-3p	220.261	265.008	8.41808	9.14331	8.77838	562.598	634.148	378.501	428.338	4.89453	2.29117	0.026899	0.163984
hsa-miR-33a-5p	122.098	152.393	77.8132	244.142	293.373	16.0991	28.8468	52.9384	92.3055	-3.74132	-1.90355	0.0269391	0.163984
hsa-miR-574-5p	306.727	377.099	120.227	258.9	268.882	571.542	738.696	1214.15	1081.32	3.38429	1.75886	0.0270549	0.164212
hsa-miR-3662	3.45468	3.35852	3.63344	18.3668	13.7821	3.53171	2.83048	3.30865	3.38161	-2.59491	-1.37568	0.0275821	0.165129
hsa-miR-320a-3p	442.94	578.032	76.4822	218.878	76.8108	1021.63	1114.61	1054.86	785.077	3.56738	1.83486	0.0274605	0.165129
hsa-miR-1295b-5p	1.77669	1.31192	1.72678	1.28327	0.614487	7.15516	7.22676	2.79963	0.25049	3.2022	1.67906	0.0273832	0.165129
hsa-miR-4743-5p	1.72734	2.20403	2.37433	1.7645	14.221	1.69706	1.98736	0.169674	1.62818	-3.23854	-1.69534	0.0275057	0.165129
hsa-miR-6795-5p	2.76375	2.7288	6.1157	0.160409	5.53038	1.78879	1.80669	0.212093	0.25049	-3.42293	-1.77523	0.0276003	0.165129
hsa-miR-1323	1.23382	2.20403	1.87068	0.160409	2.7213	0.963195	1.50558	3.09656	15.5721	3.21425	1.68448	0.0276981	0.165241
hsa-miR-3713	1.52993	1.52183	3.59747	2.72695	2.45795	18.6676	8.00966	2.58753	0.25049	3.10685	1.63545	0.0281114	0.166757
hsa-let-7i-3p	34.7936	50.4302	22.6641	36.894	37.747	10.2741	14.3331	10.3925	19.8722	-2.65879	-1.41077	0.0280486	0.166757
hsa-miR-1236-3p	4.09627	3.98824	9.20952	20.2115	11.4997	1.97226	2.64981	1.824	7.55644	-2.78819	-1.47933	0.0282654	0.167197
hsa-miR-219b-5p	3.99756	4.25062	10.7564	11.9505	9.91957	3.66931	4.03494	1.65432	3.75735	-2.49042	-1.31639	0.0284549	0.167844
hsa-miR-4321	10.9563	9.07849	12.807	6.41636	5.53038	29.4462	28.365	26.1298	17.7848	2.80946	1.49029	0.0286172	0.168327
hsa-miR-5187-5p	4.34303	3.41099	7.55468	3.84981	1.14119	7.61383	8.06989	10.5198	15.4469	2.53628	1.34271	0.0293892	0.172384
hsa-miR-548ao-5p	1.92475	1.67926	7.05104	1.12286	0.614487	2.29332	2.64981	13.9133	9.14288	2.79241	1.48151	0.0296939	0.173684
hsa-miR-1288-5p	17.6682	13.3816	8.92172	12.0307	22.1215	39.1699	33.3033	43.0973	66.7973	3.08399	1.6248	0.0301387	0.175795
hsa-miR-2909	1.33252	0.734676	0.503646	1.7645	1.40454	0.275199	0.481784	0.466604	0.208741	-3.11543	-1.63943	0.0302257	0.175813
hsa-miR-892c-5p	0.641584	1.04954	3.02187	0.0802044	2.1946	0.64213	0.60223	0.127256	0.166993	-3.6669	-1.87456	0.030489	0.176853
hsa-miR-6850-5p	27.7855	22.67	4.64073	2.96756	1.05341	49.5816	82.2647	26.7661	18.0353	3.72853	1.89861	0.0310666	0.179706
hsa-miR-6772-5p	6.51455	6.13979	3.99319	0.72184	5.4426	19.9519	10.539	7.50809	9.43512	2.58901	1.3724	0.0314134	0.181053
hsa-miR-10395-3p	2.07281	2.46641	11.9076	2.40613	5.79373	2.70612	2.46914	1.27256	0.918463	-2.69117	-1.42823	0.0314724	0.181053
hsa-miR-7106-3p	2.02346	1.73174	3.02187	1.68429	0.614487	3.71518	4.6974	6.02344	3.59035	2.3958	1.26051	0.0320546	0.183897
hsa-miR-6730-3p	8.68606	8.86859	2.87797	1.7645	5.00368	37.1059	23.7881	2.20577	4.34182	3.09176	1.62843	0.032252	0.184021
hsa-miR-134-5p	34.5962	45.8123	7.66261	3.529	5.79373	72.102	91.3583	61.21	80.2402	3.90867	1.96668	0.0321772	0.184021
hsa-miR-3654	12.8317	14.7985	8.41808	19.0887	30.1098	13.1178	6.62453	0.975627	3.21462	-2.84707	-1.50948	0.0327064	0.185992
hsa-miR-6871-3p	1.48058	1.88917	1.04327	7.05799	3.95027	0.504531	0.903345	1.78158	1.08546	-2.83992	-1.50585	0.032775	0.185992
hsa-miR-455-3p	310.774	330.132	7.77053	11.6296	5.53038	760.236	1099.13	321.236	344.256	4.73948	2.24473	0.0329621	0.186536
hsa-miR-6840-3p	1.82605	1.04954	1.54691	0	0.263351	1.88052	2.46914	3.18139	3.33986	2.80263	1.48678	0.0330492	0.186536
hsa-miR-4750-5p	3.6521	5.61502	1.51094	4.33104	3.248	12.4757	8.85279	5.09023	8.93414	2.41299	1.27082	0.0332879	0.187379
hsa-miR-6529-3p	3.25727	3.77833	4.24501	5.61431	7.90054	2.66025	1.86691	1.78158	1.87867	-2.38015	-1.25105	0.0334781	0.187944
hsa-miR-4446-5p	3.50404	3.09613	12.9509	3.6092	8.51503	12.5674	11.9844	20.6154	21.3334	2.61664	1.38772	0.0336418	0.188358
hsa-miR-4638-3p	2.41828	2.36146	2.62615	4.73206	4.30141	1.60532	2.40892	0.0848371	0.542728	-2.84484	-1.50835	0.0337514	0.188468
hsa-miR-4708-5p	0.9377	0.682199	3.77734	0.240613	0.175568	2.43092	1.62602	4.96297	4.80105	2.89294	1.53253	0.0348448	0.193541
hsa-miR-218-5p	372.316	455.237	150.518	374.635	569.278	809.038	1503.23	1245.58	1375.82	3.20901	1.68213	0.0347972	0.193541
hsa-miR-299-3p	7.20548	11.0726	1.11522	0.160409	2.28238	16.7871	22.5234	7.38083	8.6419	3.15571	1.65796	0.0351103	0.1945
hsa-miR-6821-5p	1.92475	2.09907	12.1954	6.25595	4.56476	3.57758	1.68624	1.65432	2.08741	-2.40415	-1.26553	0.0353162	0.195124
hsa-miR-503-3p	7.94577	5.19521	6.29557	1.68429	0.263351	11.8335	12.4662	8.95032	14.5284	2.77177	1.47081	0.0357428	0.196962
hsa-miR-3529-3p	0.74029	1.25944	1.54691	0.160409	0.438919	0.275199	0.361338	0.127256	0.292238	-3.29104	-1.71854	0.0359909	0.197808
hsa-miR-323a-5p	55.6698	61.2405	6.43947	10.988	4.82811	165.532	117.796	58.8346	77.4431	3.76627	1.91314	0.0361008	0.197893
hsa-miR-4286	6.66261	10.128	8.2382	5.85492	11.5875	7.93489	11.9844	28.2083	40.0366	2.59598	1.37628	0.0362377	0.198124
hsa-miR-4715-5p	2.31957	1.94164	32.737	9.0631	7.19827	3.25652	2.52937	3.22381	5.63602	-2.90972	-1.54088	0.0364663	0.198855
hsa-miR-579-5p	6.07037	4.56549	8.63392	5.3737	8.77838	6.78823	8.06989	23.7544	29.0986	2.53251	1.34057	0.0368294	0.200313
hsa-miR-4756-3p	1.62864	0.99706	2.59018	2.24572	2.37016	1.33013	0.963568	0.254511	0.208741	-2.87415	-1.52314	0.0371519	0.20061
hsa-miR-212-5p	8.88347	8.29134	15.3612	13.7952	19.3124	22.0159	39.2654	19.8943	51.7261	2.53412	1.34149	0.0370776	0.20061
hsa-miR-4765	2.96116	1.99412	2.23043	1.52388	5.35481	0.779729	1.32491	0.254511	1.87867	-2.64055	-1.40084	0.0371713	0.20061
hsa-miR-302a-3p	7.5016	8.3963	1.04327	0.240613	1.84346	11.8794	12.5866	12.0469	7.51469	2.8791	1.52562	0.0375867	0.20165
hsa-miR-10399-5p	2.22087	1.3644	1.83471	2.72695	5.79373	0.596264	1.20446	1.27256	1.1272	-2.60572	-1.38168	0.0376574	0.20165
hsa-miR-1284	3.01051	3.04366	2.5542	5.13308	3.42357	3.76105	5.11896	11.962	12.274	2.42848	1.28005	0.0377499	0.20165
hsa-miR-6719-3p	1.18446	1.15449	1.87068	6.09554	7.90054	0.366931	0.903345	0.763534	3.08937	-2.81128	-1.49123	0.0377002	0.20165
hsa-miR-6799-5p	6.21843	6.92694	1.40301	0.160409	5.79373	11.7418	9.75613	10.0956	12.5245	2.68508	1.42496	0.0378455	0.20165
hsa-miR-4535	2.56634	3.04366	8.13028	6.49656	6.67157	2.06399	2.04758	3.47832	0.50098	-2.65619	-1.40936	0.0379776	0.20184
hsa-miR-12120	4.34303	6.19227	3.09382	21.0938	4.56476	2.24745	2.77026	2.75721	5.09329	-2.43056	-1.28129	0.0381573	0.202282
hsa-miR-1248	4.49109	3.41099	1.61886	5.05288	8.51503	2.93545	1.92714	1.35739	1.1272	-2.4935	-1.31817	0.0387621	0.203125
hsa-miR-7158-5p	0.690937	0.629722	1.11522	1.12286	3.16022	0.137599	0.662453	0.0848371	0.793218	-3.15939	-1.65965	0.0388008	0.203125
hsa-miR-5087	3.55339	2.78127	21.5488	3.6092	4.65254	4.08211	2.3487	1.90884	2.58839	-2.65421	-1.40828	0.0387571	0.203125
hsa-miR-30a-5p	1080.82	1295.6	12368	20710.2	11323	853.345	1351.59	2870.76	5959.57	-3.39113	-1.76176	0.0388013	0.203125
hsa-miR-510-3p	1.97411	2.7288	6.90714	2.72695	0.614487	0.412798	0.963568	0.169674	2.63014	-2.8686	-1.52035	0.0385275	0.203125
hsa-miR-7106-5p	1.72734	2.0466	2.15848	8.74228	4.65254	1.37599	1.02379	36.0558	10.1866	3.15063	1.65564	0.0389333	0.203308
hsa-miR-4667-3p	4.73785	3.98824	22.5202	49.9674	71.1049	3.25652	6.20297	16.5857	13.3177	-3.09186	-1.62847	0.0391263	0.203807
hsa-miR-618	1.03641	0.83963	4.71268	2.08532	4.91589	3.48585	6.26319	8.2292	8.5584	2.44234	1.28827	0.0394541	0.203993
hsa-miR-487b-3p	242.618	307.987	9.78511	6.17574	12.6409	522.052	693.107	451.503	385.963	4.42922	2.14705	0.039435	0.203993
hsa-miR-4328	1.97411	1.25944	2.51823	1.68429	3.59914	1.78879	1.02379	0.0424186	0.125245	-2.96512	-1.56809	0.0393688	0.203993
hsa-miR-603	0.74029	0.577245	2.73408	0.0802044	2.45795	0.458664	0.782899	0.254511	0.0417483	-3.46307	-1.79205	0.0398502	0.205533
hsa-miR-4326	5.42879	3.72586	4.13709	1.8447	3.248	7.75143	5.84163	7.21116	13.6934	2.32226	1.21553	0.0399583	0.205584
hsa-miR-1245b-3p	1.43123	3.09613	2.30238	0.0802044	0.614487	4.40318	6.20297	3.22381	3.7156	2.85158	1.51176	0.0402764	0.206713
hsa-miR-26a-1-3p	6.5639	4.9853	0.647544	0.160409	3.51135	4.81597	4.87807	11.7924	13.9857	2.7864	1.4784	0.0418634	0.213184
hsa-miR-4708-3p	5.13267	7.0319	2.05056	8.66208	11.5875	3.25652	3.49294	1.90884	2.58839	-2.43858	-1.28604	0.041941	0.213184
hsa-miR-4447	2.02346	1.62678	3.20175	0.160409	1.75568	3.02718	2.89071	6.49004	6.47099	2.64984	1.40591	0.0419444	0.213184
hsa-miR-4752	2.22087	3.04366	12.4832	5.77472	5.4426	1.33013	2.28848	3.47832	2.12916	-2.51479	-1.33044	0.0417097	0.213184
hsa-miR-1276	3.25727	3.20109	6.00777	22.2166	4.21362	1.92639	4.75762	2.24818	3.21462	-2.55779	-1.3549	0.0429236	0.217439
hsa-miR-584-3p	3.35598	2.57137	3.88527	12.9931	11.2363	3.85278	2.89071	2.92688	1.92042	-2.33418	-1.22292	0.0430931	0.217439
hsa-miR-889-3p	84.1462	100.388	2.48225	3.20818	2.45795	85.7243	158.326	220.11	175.218	4.14627	2.05181	0.0430633	0.217439
hsa-miR-8087	2.46763	3.35852	1.54691	3.12797	5.26703	1.65119	1.08401	0.975627	1.50294	-2.36305	-1.24065	0.0433379	0.218148
hsa-miR-4719	0.789642	1.3644	1.83471	3.76961	0.438919	1.19253	0.542007	0.169674	0.0834966	-3.29276	-1.7193	0.0434806	0.218341
hsa-miR-431-5p	127.33	160.946	0.647544	4.57165	6.40822	179.98	154.291	381.894	421.741	4.74176	2.24542	0.0442721	0.221784
hsa-miR-6080	0.74029	0.83963	1.87068	0	0.526703	0.550397	0.180669	0.127256	0.0417483	-3.57326	-1.83724	0.0449234	0.22451
hsa-miR-205-5p	2.12216	1.99412	2.62615	3.529	5.61816	0.825596	1.74647	1.824	0.876714	-2.38335	-1.25299	0.0451949	0.225235
hsa-miR-4305	1.18446	0.734676	1.15119	1.92491	2.89687	0.596264	0.60223	0.0424186	0.834966	-2.98977	-1.58004	0.0452836	0.225235
hsa-miR-508-3p	2.41828	2.62384	7.33884	2.56654	2.45795	1.97226	1.20446	0.763534	1.83693	-2.43	-1.28095	0.0454605	0.225579
hsa-miR-3910	1.03641	0.682199	1.58289	3.36859	0.263351	9.40262	6.26319	2.24818	0.0834966	3.23101	1.69198	0.0457788	0.226058
hsa-miR-374c-3p	2.71439	3.46347	1.65484	0.160409	0.263351	7.79729	4.6974	3.60558	2.67189	2.79731	1.48404	0.045715	0.226058
hsa-miR-3692-5p	3.80015	3.77833	6.00777	11.1484	6.75935	4.35731	3.31227	1.73916	1.33595	-2.34048	-1.2268	0.0459889	0.226058
hsa-miR-1233-3p	1.82605	2.7288	4.28099	2.72695	3.95027	1.69706	1.38513	1.61191	0.292238	-2.49396	-1.31844	0.0459712	0.226058
hsa-miR-8076	1.97411	1.99412	2.01458	4.17063	2.10681	0.412798	1.74647	0.0424186	1.50294	-2.65248	-1.40734	0.0462233	0.226142
hsa-miR-6852-5p	3.89886	3.46347	4.02916	4.41124	7.81276	2.61439	2.46914	1.35739	1.92042	-2.23994	-1.16346	0.0463654	0.226142
hsa-miR-3152-3p	1.67799	1.52183	1.22314	1.8447	3.248	2.10986	1.5658	15.3979	1.75343	2.74679	1.45775	0.0461639	0.226142
hsa-miR-192-5p	34.0533	60.4533	91.3038	64.725	87.4327	17.8879	37.5189	15.9494	15.6139	-3.11165	-1.63768	0.0464379	0.226142
hsa-miR-6820-5p	2.07281	2.51889	1.76276	2.80716	4.56476	2.52265	3.1316	8.52613	12.2323	2.42569	1.27839	0.0472294	0.228932
hsa-miR-3613-5p	68.8469	85.3798	35.1113	1.12286	5.61816	18.7594	49.4431	277.884	270.905	3.9317	1.97515	0.0471828	0.228932
hsa-miR-4496	5.82361	6.45465	1.87068	0.481227	2.37016	6.32957	26.739	1.90884	3.50686	2.81464	1.49295	0.0476711	0.230008
hsa-miR-1343-3p	5.5275	4.82787	5.03646	3.04777	6.14487	15.5029	14.3331	8.99274	6.67973	2.30385	1.20405	0.0476623	0.230008
hsa-miR-25-3p	4573.36	5265.79	2122.72	10470.4	12031.5	24018.8	20217.8	13235.7	17178.5	2.7076	1.43701	0.0480325	0.230688
hsa-miR-6083	0.542879	0.472292	2.23043	3.12797	0.263351	0.412798	0.361338	0.805953	0.125245	-3.08907	-1.62717	0.0479544	0.230688
hsa-miR-6879-3p	1.03641	0.682199	2.51823	1.36348	5.4426	0.183466	1.20446	0.212093	1.37769	-2.9509	-1.56115	0.0491621	0.235573
hsa-miR-7153-3p	9.72247	7.2418	6.15167	12.9129	2.7213	66.1852	16.4409	3.09656	5.88651	2.95225	1.56181	0.0497409	0.235905
hsa-miR-3614-5p	3.6521	5.35264	3.4176	8.10065	5.9693	3.76105	2.10781	1.35739	1.54469	-2.39948	-1.26272	0.0495805	0.235905
hsa-miR-130b-5p	98.0637	105.111	25.9377	3.04777	10.7096	146.681	178.622	232.03	167.828	3.73062	1.89942	0.0495525	0.235905
hsa-miR-4721	0.789642	1.78421	0.0719494	0.0802044	3.59914	1.37599	2.22825	6.6173	5.42728	3.10624	1.63517	0.0497946	0.235905
hsa-miR-670-3p	1.8754	1.3644	1.15119	1.04266	4.65254	1.42186	0.60223	0.381767	0.459231	-2.77255	-1.47122	0.0494249	0.235905
hsa-miR-6816-3p	2.76375	3.51595	0.647544	5.13308	3.16022	1.10079	1.08401	2.37544	0.333986	-2.46663	-1.30254	0.0509644	0.238354
hsa-miR-4802-3p	4.04692	6.24474	0.359747	2.08532	2.1946	4.81597	6.8052	7.04148	9.30987	2.33579	1.22391	0.0509512	0.238354
hsa-miR-300	82.2215	107.945	0.0719494	0	0.877838	184.291	225.114	168.571	261.929	5.49181	2.45728	0.0504503	0.238354
hsa-miR-11401	3.40533	3.09613	0.61157	2.40613	0.263351	4.58664	6.0223	5.09023	4.34182	2.54101	1.3454	0.0509389	0.238354
hsa-miR-4768-3p	2.02346	2.41393	1.33106	0.962453	3.59914	4.99944	7.70855	1.95125	4.59231	2.3344	1.22305	0.0509945	0.238354
hsa-miR-6513-5p	3.30663	4.88035	15.577	3.84981	2.7213	3.11892	2.40892	1.65432	3.46511	-2.29145	-1.19626	0.0508182	0.238354
hsa-miR-5580-5p	3.20792	2.57137	2.87797	2.00511	7.98833	12.6133	9.87658	4.45395	6.55448	2.25838	1.17529	0.051474	0.240059
hsa-miR-4751	2.31957	2.20403	6.15167	6.49656	2.1946	1.65119	1.68624	2.5027	0.125245	-2.59842	-1.37764	0.0520247	0.241829
hsa-miR-7850-5p	1.97411	2.78127	2.01458	6.09554	4.91589	1.19253	1.62602	1.99367	1.1272	-2.35581	-1.23623	0.0520844	0.241829
hsa-miR-6077	4.19497	6.03484	6.33154	11.0682	9.744	3.76105	2.71004	4.07218	3.7156	-2.06833	-1.04847	0.05265	0.243914
hsa-miR-6731-5p	11.8446	14.1687	6.72727	9.94535	8.86616	23.9423	18.7294	33.8076	27.9714	2.53335	1.34105	0.0528681	0.243944
hsa-miR-5009-5p	46.5889	52.4244	54.4297	56.0629	57.7617	26.098	26.5584	7.88985	12.441	-2.93228	-1.55203	0.0528895	0.243944
hsa-miR-144-5p	0.246763	0.314861	1.33106	3.20818	4.12584	0.321065	0.722676	1.06046	0	-3.47201	-1.79577	0.0531744	0.244719
hsa-miR-6895-5p	2.51698	1.94164	3.56149	7.2986	8.07611	1.88052	1.50558	3.52074	0.751469	-2.42102	-1.27562	0.053324	0.244869
hsa-miR-12118	0.74029	1.04954	2.87797	5.21329	0.790054	1.65119	0.240892	0.933208	0.292238	-2.71289	-1.43983	0.0535914	0.245559
hsa-miR-5571-5p	22.8503	24.4017	40.5075	6.09554	16.5911	108.795	55.1041	78.644	52.1854	3.32877	1.73499	0.053925	0.246226
hsa-miR-1260a	555.859	541.456	739.316	1936.38	2960.6	2744.6	1877.81	5024.56	5190.9	2.75452	1.4618	0.0539721	0.246226
hsa-miR-454-5p	3.35598	2.99118	0.53962	0.320818	0.614487	1.23839	1.38513	2.75721	13.3177	2.96267	1.5669	0.0541274	0.246397
hsa-miR-376c-3p	758.205	949.673	4.31696	29.1142	10.1829	1580.97	2167.85	765.189	1044.25	3.96665	1.98792	0.0546226	0.247532
hsa-miR-198	0.641584	0.734676	0.719494	4.73206	1.75568	0.137599	0.240892	1.61191	0.0417483	-3.31671	-1.72975	0.0545385	0.247532
hsa-miR-204-5p	789.593	1183.09	84.7564	80.2044	105.428	162.275	237.158	15.2283	2.5049	-4.30164	-2.10489	0.0547312	0.247532
hsa-miR-4661-5p	14.0161	14.6935	1.54691	19.6501	8.07611	124.206	31.6773	1.95125	2.46315	3.45466	1.78855	0.0549129	0.247613
hsa-miR-29a-3p	733.035	1138.28	906.634	2045.94	1727.85	422.934	641.496	376.974	414.477	-2.82414	-1.49781	0.0552897	0.247613
hsa-miR-4453	8.38995	4.61796	6.00777	20.0511	11.0608	4.86184	6.44386	1.78158	4.21658	-2.31407	-1.21043	0.0552259	0.247613
hsa-miR-3192-3p	7.74836	6.66456	10.7924	19.1689	7.81276	16.5578	15.7784	43.6063	28.0131	2.49391	1.31841	0.0553405	0.247613
hsa-miR-10400-3p	7.10678	6.40218	5.50413	0.401022	4.21362	14.2186	16.742	5.98102	9.47686	2.44198	1.28805	0.0552804	0.247613
hsa-miR-1180-5p	0.690937	0.419815	9.64122	2.24572	6.23265	0.321065	0.662453	1.61191	2.71364	-2.88717	-1.52966	0.0557647	0.248979
hsa-miR-1234-3p	3.40533	3.98824	2.19446	4.89247	0.614487	4.08211	13.7911	3.77525	6.0535	2.28192	1.19025	0.0561154	0.250012
hsa-miR-5193	5.97167	7.18933	24.103	61.2762	71.0171	5.18291	4.57695	14.7192	22.7111	-2.87082	-1.52146	0.0563929	0.250275
hsa-miR-3652	11.4992	10.3904	2.59018	19.6501	14.221	6.0085	7.5881	3.81767	2.75539	-2.31191	-1.20909	0.0564136	0.250275
hsa-miR-4701-5p	9.08088	9.60326	8.74185	3.36859	7.63719	26.786	17.9465	14.4223	11.6478	2.29016	1.19545	0.0572876	0.253616
hsa-miR-4753-5p	6.02102	5.24768	2.62615	6.97779	8.86616	3.76105	3.79405	2.75721	0.375735	-2.22336	-1.15274	0.057425	0.253688
hsa-miR-3939	2.86245	3.93576	18.0953	2.24572	6.84714	2.93545	2.58959	2.79963	3.33986	-2.33752	-1.22498	0.0579461	0.255451
hsa-miR-7703	2.46763	2.36146	5.10841	0.160409	0.70227	2.93545	2.95093	9.3745	7.05546	2.54822	1.34949	0.0583118	0.256523
hsa-miR-4281	5.33008	5.56255	7.77053	2.72695	6.496	25.9145	18.0067	5.76893	4.38357	2.41514	1.27211	0.0584614	0.256642
hsa-miR-432-5p	97.6689	115.921	2.15848	1.92491	3.33578	245.569	207.89	245.052	37.6987	4.16259	2.05748	0.0586828	0.256797
hsa-miR-7159-5p	2.41828	3.20109	2.842	8.58188	2.89687	1.00906	1.20446	1.90884	2.83888	-2.26232	-1.17781	0.0587797	0.256797
hsa-miR-3074-5p	3.20792	3.35852	6.83519	10.0256	9.744	2.20159	2.89071	1.824	4.75931	-2.2584	-1.1753	0.0588646	0.256797
hsa-miR-671-3p	5.28073	4.61796	7.62663	18.9282	4.47697	22.7039	22.945	12.0469	21.5839	2.42525	1.27813	0.0592979	0.258149
hsa-miR-4645-3p	1.52993	1.67926	2.26641	2.16552	0.790054	0.412798	1.02379	0.933208	0.25049	-2.6445	-1.40299	0.0594306	0.25819
hsa-miR-3149	1.82605	1.73174	29.0675	3.6894	3.86249	4.03625	1.38513	2.5027	3.84084	-2.73436	-1.4512	0.0596503	0.258608
hsa-miR-3117-3p	5.82361	5.14273	1.33106	0	1.14119	9.90715	11.8639	4.70846	3.04763	2.72873	1.44823	0.0603167	0.260957
hsa-miR-4695-5p	1.43123	1.25944	0.647544	0.240613	0.438919	2.01812	2.58959	1.01805	2.25441	2.34554	1.22992	0.0605875	0.26105
hsa-miR-8060	2.71439	1.99412	0.719494	10.0256	1.84346	1.92639	2.3487	0.127256	0.709721	-2.70353	-1.43485	0.0604857	0.26105
hsa-miR-4499	5.72491	4.9853	6.1157	12.5921	7.37384	4.35731	2.28848	0.975627	5.97001	-2.15525	-1.10786	0.0609233	0.261958
hsa-miR-135a-2-3p	1.18446	1.52183	4.85658	1.68429	0.526703	1.00906	0.903345	1.01805	0.292238	-2.46401	-1.30101	0.061082	0.262102
hsa-miR-324-3p	8.38995	9.02602	2.842	6.57676	10.2707	17.6127	15.116	11.962	22.4606	2.27129	1.18351	0.0616052	0.263268
hsa-miR-122b-5p	3.6521	1.20697	0.395722	0	1.58011	3.99038	2.40892	2.2906	5.71952	2.61642	1.3876	0.0615053	0.263268
hsa-miR-758-5p	1.92475	3.25356	2.66213	5.3737	0.614487	0.963195	1.26468	1.86642	0.667973	-2.3207	-1.21456	0.0617825	0.263488
hsa-miR-6888-5p	2.07281	1.57431	2.12251	3.20818	0.614487	8.66875	12.1048	0.678697	0.125245	2.79674	1.48375	0.0619653	0.26373
hsa-miR-4780	4.14562	5.51007	2.01458	0.561431	0.438919	10.5493	9.69591	3.01172	2.00392	2.46864	1.30372	0.0628449	0.266931
hsa-miR-1279	1.28317	0.524768	0.971317	4.57165	0.351135	0.871462	0.843122	0.212093	0.166993	-2.93668	-1.55418	0.0632593	0.268148
hsa-miR-4747-3p	2.51698	1.88917	8.70587	0.0802044	4.56476	14.6314	6.98587	9.96836	4.9263	2.55712	1.35452	0.063596	0.268396
hsa-miR-376a-5p	0.789642	1.15449	1.58289	1.52388	4.74033	0.963195	0.421561	1.27256	0.0417483	-2.85809	-1.51505	0.0636872	0.268396
hsa-miR-7975	6.61325	5.30016	2.33835	6.01533	2.37016	3.25652	2.64981	0.848371	1.37769	-2.23511	-1.16035	0.0637024	0.268396
hsa-miR-3133	1.97411	1.04954	1.15119	4.65186	0.263351	0.64213	1.32491	0.381767	0.292238	-2.76771	-1.46869	0.0644654	0.270522
hsa-miR-887-3p	57.2984	67.1704	3.81332	0.320818	7.54941	10.4117	10.1175	8.10195	7.22246	-3.03818	-1.60321	0.0644011	0.270522
hsa-miR-3154	6.5639	6.19227	15.8289	0.240613	8.07611	10.2741	21.4394	31.2625	13.8604	2.59544	1.37598	0.0654356	0.274044
hsa-miR-4251	7.89642	6.61208	3.1298	4.25084	2.45795	8.43942	8.06989	9.28967	16.7411	2.17331	1.11989	0.0656446	0.274371
hsa-miR-7152-5p	2.91181	2.99118	6.33154	3.28838	4.03806	1.65119	1.68624	3.01172	0.292238	-2.36102	-1.23941	0.0657905	0.274433
hsa-miR-216a-5p	5.18203	6.3497	1.33106	0.160409	6.05708	16.2367	8.31078	5.55683	7.80693	2.48034	1.31054	0.0668148	0.278126
hsa-miR-6081	3.60274	3.67338	2.9859	17.9658	4.03806	3.71518	2.83048	1.31498	4.00784	-2.16504	-1.1144	0.0669415	0.278126
hsa-miR-6828-5p	2.41828	2.41393	1.40301	5.77472	1.84346	1.92639	1.86691	0.212093	0.0417483	-2.74241	-1.45544	0.0676451	0.279256
hsa-miR-5579-3p	123.431	140.743	136.416	673.958	773.551	24.4468	64.5591	120.808	216.507	-3.46752	-1.79391	0.0675915	0.279256
hsa-miR-433-3p	17.0267	23.3522	2.59018	1.60409	4.56476	26.3732	30.0513	17.5613	31.6035	2.68082	1.42267	0.0677468	0.279256
hsa-miR-4713-5p	3.6521	4.40805	1.90666	4.49145	5.4426	8.53115	8.49145	7.93227	7.93218	2.10579	1.07436	0.0674902	0.279256
hsa-miR-548g-3p	6.76131	6.24474	2.44628	8.18085	0.877838	2.93545	3.01115	0.212093	1.71168	-2.49599	-1.31961	0.0683021	0.280116
hsa-miR-595	5.82361	5.61502	10.1808	12.8327	8.60281	3.39412	3.07137	4.41153	5.71952	-2.06024	-1.04281	0.0682568	0.280116
hsa-miR-4327	20.432	24.4542	6.54739	13.3941	18.3468	39.8121	16.3204	26.0026	90.1346	2.5895	1.37267	0.0683568	0.280116
hsa-miR-4742-5p	0.641584	0.262384	0.0719494	0.0802044	0	0.183466	0.361338	1.35739	0.918463	3.12362	1.64322	0.0687732	0.281272
hsa-miR-421	14.3616	22.8274	5.75595	6.65697	4.38919	3.94451	6.0223	3.05414	5.88651	-2.28999	-1.19534	0.0689209	0.281326
hsa-miR-6776-3p	0.641584	0.787153	7.44676	4.17063	3.7747	0.687996	1.20446	1.10288	2.37965	-2.49852	-1.32108	0.0692283	0.282031
hsa-miR-6501-5p	10.8082	6.97942	50.3646	7.86004	13.7821	10.1365	6.74498	6.02344	7.18071	-2.39114	-1.2577	0.0695692	0.28287
hsa-miR-3622a-5p	1.48058	1.83669	0.575595	0.160409	0.526703	1.51359	1.62602	1.52707	4.30007	2.39405	1.25945	0.0712884	0.288021
hsa-miR-802	0.641584	0.577245	0.251823	1.60409	0.0877838	1.37599	1.14424	4.83572	0.125245	2.95329	1.56232	0.0712822	0.288021
hsa-miR-3613-3p	1.82605	2.57137	0.0359747	0.0802044	0.614487	2.66025	2.52937	2.2906	3.38161	2.6165	1.38764	0.0720741	0.288021
hsa-miR-101-2-5p	2.71439	3.14861	1.54691	1.7645	2.28238	1.92639	1.38513	0.0848371	0.459231	-2.39137	-1.25784	0.0719661	0.288021
hsa-miR-635	3.45468	3.77833	4.35294	4.89247	10.2707	1.60532	2.83048	3.648	1.54469	-2.20539	-1.14103	0.0716818	0.288021
hsa-miR-1914-3p	0.690937	0.892106	3.30967	4.81227	4.30141	1.00906	1.26468	1.10288	1.41944	-2.31287	-1.20968	0.07187	0.288021
hsa-miR-640	2.76375	2.51889	13.3106	5.29349	4.38919	2.10986	2.16803	4.7933	0.584476	-2.34637	-1.23043	0.0720284	0.288021
hsa-miR-6833-5p	4.29368	4.61796	18.2392	4.65186	4.91589	5.7333	4.51673	0.339349	1.58644	-2.42082	-1.2755	0.0720659	0.288021
hsa-miR-4273	1.23382	1.04954	15.7929	2.00511	7.63719	0.596264	0.903345	4.24186	2.67189	-2.63208	-1.3962	0.0715178	0.288021
hsa-miR-135a-3p	6.36649	6.24474	18.527	2.80716	1.05341	4.35731	5.2394	57.3923	10.0196	2.74179	1.45512	0.0722746	0.288272
hsa-miR-2861	3.30663	3.93576	0.791443	3.93002	2.10681	9.26502	4.6974	3.98735	6.55448	2.18411	1.12705	0.0726646	0.289277
hsa-miR-4732-5p	18.4085	14.4311	3.88527	2.88736	6.93492	56.2781	15.5978	7.7626	17.2003	2.59632	1.37647	0.0728938	0.289639
hsa-miR-6507-5p	1.03641	1.20697	0.107924	3.84981	3.248	1.14666	1.08401	0.127256	0.0417483	-3.13543	-1.64867	0.0731101	0.289948
hsa-miR-4269	0.74029	0.524768	0.323772	0.802044	0.351135	0.229332	0.361338	0.0848371	0.125245	-2.80935	-1.49023	0.0738035	0.292145
hsa-miR-8086	2.76375	1.73174	1.65484	3.04777	0.614487	1.51359	0.782899	0.721116	0.459231	-2.26538	-1.17975	0.0743977	0.293941
hsa-miR-494-3p	17.3721	21.1482	0.323772	0.802044	0.526703	38.5278	28.9071	11.7924	20.4149	3.0949	1.62989	0.0749558	0.29415
hsa-miR-219a-5p	10.4134	10.4429	2.73408	5.69452	12.2019	27.4281	20.2349	10.0108	18.3275	2.29302	1.19725	0.0747722	0.29415
hsa-miR-3135b	6.11973	4.56549	3.48954	1.8447	3.86249	4.63251	5.11896	12.768	11.3555	2.12044	1.08436	0.075434	0.29415
hsa-miR-5192	6.41584	6.71704	4.31696	4.41124	13.3431	3.85278	5.35985	2.62995	1.96217	-2.03872	-1.02767	0.0749169	0.29415
hsa-miR-12121	7.60031	7.45171	4.24501	19.4897	3.42357	12.9802	20.8372	18.3672	21.0411	2.17229	1.11922	0.0752453	0.29415
hsa-miR-7109-5p	5.08332	11.5974	3.70539	2.56654	1.05341	3.25652	2.77026	1.86642	0.50098	-2.2984	-1.20063	0.0751345	0.29415
hsa-miR-4755-5p	1.77669	1.62678	2.51823	0.0802044	2.10681	1.05493	1.5658	6.65972	7.80693	2.6143	1.38643	0.075397	0.29415
hsa-miR-4493	5.6262	3.30604	9.38939	1.44368	7.90054	4.44904	8.25055	21.4638	16.0731	2.26429	1.17906	0.0757416	0.294801
hsa-miR-3201	5.6262	6.71704	10.6845	18.1262	19.7514	4.12798	4.99851	7.88985	5.71952	-2.13212	-1.09229	0.0765511	0.296848
hsa-miR-3162-5p	0.592232	1.04954	1.11522	0.240613	0.526703	1.60532	1.14424	1.56949	2.83888	2.4102	1.26915	0.0765147	0.296848
hsa-miR-331-5p	10.6602	14.3787	2.59018	6.89758	0.790054	3.76105	3.97472	2.33302	2.3379	-2.28186	-1.19021	0.0768009	0.297266
hsa-miR-6503-3p	2.71439	1.78421	2.66213	9.62453	6.23265	4.49491	1.20446	0.763534	1.41944	-2.3197	-1.21394	0.0769685	0.297365
hsa-miR-1914-5p	2.22087	1.57431	1.00729	4.73206	8.51503	1.60532	0.903345	0.975627	2.54665	-2.36039	-1.23903	0.0778935	0.298284
hsa-miR-4451	56.5581	56.4651	6.07972	19.1689	8.60281	224.929	67.7509	24.9845	39.2017	3.0357	1.60203	0.0776444	0.298284
hsa-miR-4423-5p	2.8131	1.62678	42.2343	11.389	19.1369	5.22877	4.93829	5.21748	9.35162	-2.49656	-1.31994	0.0778543	0.298284
hsa-miR-7843-3p	6.76131	5.92988	15.5051	25.505	12.5531	6.32957	4.93829	8.69581	5.17679	-2.1022	-1.0719	0.0779186	0.298284
hsa-miR-6509-5p	1.48058	1.20697	11.2961	2.40613	0.790054	0.779729	1.26468	2.67237	0.834966	-2.48678	-1.31428	0.0774278	0.298284
hsa-miR-576-5p	39.4328	37.4685	1.61886	2.40613	3.07243	34.3998	58.7175	61.7614	55.2747	3.12424	1.64351	0.078305	0.299216
hsa-miR-642a-3p	1.28317	0.734676	1.40301	0.160409	0.526703	0.871462	2.64981	3.26623	1.16895	2.3223	1.21555	0.0786843	0.299573
hsa-miR-409-5p	9.62376	11.6499	1.76276	0.401022	0.438919	15.7322	22.1621	4.83572	8.01567	2.64631	1.40398	0.0785842	0.299573
hsa-miR-10a-5p	4069.12	4773.4	10738.5	27282.8	27812.5	4654.43	6603.82	5746.91	6228.22	-2.57134	-1.36252	0.0800818	0.299638
hsa-miR-2114-5p	1.72734	1.57431	7.98638	1.60409	2.89687	4.40318	1.68624	17.0098	7.01371	2.36981	1.24477	0.0791102	0.299638
hsa-miR-4787-3p	0.493526	0.734676	1.11522	0	0.351135	0.321065	1.20446	4.36911	0.50098	2.86712	1.5196	0.0796858	0.299638
hsa-miR-664a-3p	23.2451	30.2267	28.6359	62.3189	82.0779	25.4559	29.7502	11.4954	8.72539	-2.40165	-1.26403	0.0800192	0.299638
hsa-miR-3690	4.73785	5.77245	5.86387	5.29349	3.42357	3.25652	3.37249	2.16335	1.54469	-1.97884	-0.984655	0.078864	0.299638
hsa-miR-3148	3.30663	3.88329	1.40301	14.7576	9.2173	2.70612	2.10781	0.975627	5.21854	-2.35316	-1.2346	0.0797436	0.299638
hsa-miR-6781-5p	5.5275	5.35264	3.95722	0.561431	1.93124	3.43998	4.21561	13.6164	10.4788	2.2742	1.18536	0.079686	0.299638
hsa-miR-6826-3p	2.51698	1.88917	6.61934	14.517	7.81276	1.46773	2.40892	2.62995	5.38553	-2.23247	-1.15864	0.0792959	0.299638
hsa-miR-1273h-3p	2.96116	2.67632	3.23772	2.40613	0.351135	1.42186	1.62602	0.721116	0.0417483	-2.466	-1.30217	0.0801035	0.299638
hsa-miR-2054	0.345468	0.944583	3.88527	0.160409	0.438919	0.412798	0.180669	0.848371	0.125245	-2.96199	-1.56657	0.0801324	0.299638
hsa-miR-138-2-3p	0.542879	0.524768	4.64073	12.7525	0.175568	0.183466	0.722676	2.03609	2.00392	-2.99935	-1.58465	0.0803999	0.300102
hsa-miR-3186-5p	2.07281	1.94164	0.935342	1.20307	2.80908	7.43036	2.58959	3.18139	2.88063	2.26397	1.17885	0.0811564	0.30185
hsa-miR-372-5p	1.03641	0.892106	0.647544	0.0802044	3.51135	0.64213	0.361338	0.127256	0.626224	-2.75507	-1.46209	0.08114	0.30185
hsa-miR-4524b-3p	12.9797	18.8392	6.36752	5.21329	0.877838	2.52265	3.1316	7.38083	1.92042	-2.37044	-1.24515	0.0817379	0.302937
hsa-miR-564	3.45468	3.77833	12.0875	5.77472	6.67157	2.98132	3.31227	37.7101	17.743	2.4265	1.27887	0.0816884	0.302937
hsa-miR-4521	143.172	147.46	2.12251	7.2986	4.03806	415.733	247.336	110.373	142.028	3.76225	1.9116	0.0824499	0.304497
hsa-miR-489-5p	1.18446	0.314861	0.719494	0.160409	2.63351	0.687996	0.240892	0.339349	0.125245	-2.81577	-1.49353	0.0823241	0.304497
hsa-miR-10522-5p	1.33252	2.20403	1.87068	1.92491	2.10681	1.14666	0.782899	1.23014	0.292238	-2.17093	-1.11832	0.0826653	0.304756
hsa-miR-4699-3p	0.838995	0.944583	0	1.20307	2.01903	0.0917328	0.301115	0.509023	0.417483	-2.95484	-1.56308	0.0831583	0.306034
hsa-miR-523-3p	1.23382	1.31192	2.59018	0.0802044	0.263351	3.21065	1.62602	3.30865	2.88063	2.43601	1.28452	0.0842776	0.306397
hsa-miR-4666a-3p	23.8867	25.2414	8.88575	20.6125	27.0374	12.8426	24.029	107.022	88.2976	2.74773	1.45824	0.0841691	0.306397
hsa-miR-3131	2.27022	1.88917	4.56879	0.641636	1.66789	1.97226	1.86691	9.50176	6.17875	2.18573	1.12811	0.0847202	0.306397
hsa-miR-6870-3p	0.888347	0.734676	2.6981	1.8447	5.17924	0.871462	0.903345	0.551441	1.66993	-2.24107	-1.16419	0.0846928	0.306397
hsa-miR-4448	0.592232	0.734676	3.30967	7.37881	2.28238	0.687996	1.20446	2.33302	0.459231	-2.42659	-1.27893	0.0843223	0.306397
hsa-miR-4687-3p	6.4652	4.67044	3.70539	2.24572	8.60281	11.9253	16.2	9.28967	6.26224	2.12605	1.08817	0.0843773	0.306397
hsa-miR-412-5p	44.0226	49.2233	1.61886	0.481227	3.33578	64.1671	85.878	63.7127	51.6844	3.35981	1.74838	0.0843595	0.306397
hsa-miR-4504	0.789642	0.892106	0.503646	3.20818	0.175568	0.275199	0.120446	0.0848371	1.00196	-2.9304	-1.5511	0.0846104	0.306397
hsa-miR-9-3p	2.8131	2.9387	4.20904	1.04266	9.65622	1.33013	1.38513	3.39349	1.25245	-2.2302	-1.15718	0.0845577	0.306397
hsa-miR-6509-3p	3.05986	1.99412	7.62663	7.94024	5.61816	2.93545	1.20446	2.16335	3.75735	-2.07306	-1.05176	0.0838592	0.306397
hsa-miR-3974	1.77669	1.62678	2.15848	5.69452	3.95027	1.46773	1.20446	1.31498	1.71168	-2.08717	-1.06155	0.0851939	0.307579
hsa-miR-221-3p	19104.6	21384.8	5128.12	25278.7	27882.5	42311.1	51096	36425.5	53439.2	2.31923	1.21364	0.085604	0.307631
hsa-miR-203a-5p	13.572	14.0638	4.13709	4.09043	5.4426	57.7458	18.4885	3.56316	3.7156	2.52334	1.33534	0.085649	0.307631
hsa-miR-378a-5p	8.24189	7.76657	12.3393	31.4401	13.9576	4.90771	7.22676	6.95665	8.51665	-2.13064	-1.09129	0.0853997	0.307631
hsa-miR-12128	3.30663	5.98236	4.17306	8.82249	9.2173	3.25652	2.64981	4.49637	1.50294	-2.09869	-1.06949	0.0870451	0.31211
hsa-miR-12126	3.30663	1.99412	3.45357	5.21329	9.30508	1.78879	1.38513	0.509023	4.30007	-2.31305	-1.2098	0.0872957	0.312474
hsa-miR-125b-2-3p	3.10922	2.9387	2.19446	8.10065	22.4727	3.80691	5.29963	1.95125	2.4214	-2.2964	-1.19937	0.0876258	0.31312
hsa-miR-4473	2.07281	2.09907	0.827418	3.04777	0.0877838	3.21065	3.97472	2.88446	4.55056	2.23708	1.16162	0.0889811	0.316882
hsa-miR-203b-3p	2.27022	1.94164	1.36704	5.3737	8.25168	0.871462	1.26468	2.88446	1.92042	-2.18301	-1.12632	0.088869	0.316882
hsa-miR-4536-3p	0.888347	0.472292	0.719494	2.56654	3.07243	0.917328	0.301115	1.01805	0.0834966	-2.60072	-1.37891	0.0899654	0.319843
hsa-miR-3158-5p	0.641584	1.15449	4.35294	1.20307	9.04173	1.74292	1.08401	1.27256	1.33595	-2.39558	-1.26037	0.0903291	0.320592
hsa-miR-6817-3p	2.76375	2.20403	3.66942	19.7303	13.9576	3.11892	3.01115	7.84743	0.584476	-2.31767	-1.21268	0.0905666	0.320891
hsa-miR-4798-3p	0.592232	0.367338	0.575595	0	0.0877838	0.137599	0.060223	2.54511	1.2942	2.9658	1.56842	0.090832	0.321287
hsa-miR-203b-5p	4.09627	3.72586	4.35294	8.66208	3.42357	16.6036	9.99702	6.65972	5.71952	2.01239	1.00891	0.0912762	0.322314
hsa-miR-3126-3p	8.58736	7.2418	9.49732	3.84981	4.91589	18.5759	8.97323	15.6525	13.1507	2.04733	1.03374	0.0919745	0.322618
hsa-miR-1250-5p	2.41828	3.14861	1.47496	2.16552	0.351135	0.550397	0.542007	2.03609	0.125245	-2.3471	-1.23088	0.0919339	0.322618
hsa-miR-1199-5p	4.49109	5.03778	4.74866	6.33615	10.2707	3.76105	2.58959	4.24186	1.50294	-2.0238	-1.01706	0.0918158	0.322618
hsa-miR-513a-5p	158.373	161.681	83.3174	205.885	63.3799	74.4412	84.4929	17.8158	19.1625	-2.74723	-1.45798	0.0919785	0.322618
hsa-miR-4491	1.72734	1.62678	3.52552	8.90269	1.49232	1.05493	1.02379	3.47832	0.125245	-2.42055	-1.27534	0.0926889	0.324303
hsa-miR-8053	0.789642	1.41687	1.69081	3.28838	0.614487	0.687996	1.32491	0.254511	0.208741	-2.55538	-1.35354	0.0927687	0.324303
hsa-miR-596	8.58736	9.18345	15.7929	4.97268	4.21362	6.23783	11.5026	42.9276	15.6974	2.22539	1.15406	0.0931668	0.325152
hsa-miR-556-5p	2.31957	2.15155	2.48225	0	1.49232	0.917328	1.32491	0.0424186	0.125245	-2.83077	-1.5012	0.0944805	0.325536
hsa-miR-1226-3p	14.6084	17.3174	0.719494	3.529	2.63351	19.9519	22.3427	15.9918	13.4012	2.30428	1.20432	0.0942719	0.325536
hsa-miR-4487	8.88347	9.70822	15.0014	7.2184	19.8391	13.3471	6.0223	56.247	34.5258	2.27066	1.18311	0.0937377	0.325536
hsa-miR-214-5p	689.802	693.691	529.835	785.923	1616.8	3201.34	1981.28	1706.07	1284.76	2.36729	1.24324	0.0941139	0.325536
hsa-miR-6861-3p	1.52993	1.10201	3.92124	4.01022	2.10681	1.74292	0.843122	0.509023	1.71168	-2.09846	-1.06933	0.0938016	0.325536
hsa-miR-3198	3.15857	3.20109	5.93582	10.1058	3.7747	3.34825	1.74647	2.71479	2.21266	-2.07455	-1.0528	0.094316	0.325536
hsa-miR-1273h-5p	7.69901	7.2418	4.17306	1.8447	4.21362	6.78823	8.91301	15.2283	11.5643	2.09767	1.06879	0.0943731	0.325536
hsa-let-7a-2-3p	52.0177	71.1586	14.4978	5.93513	11.763	102.007	92.5628	41.4005	116.895	2.83681	1.50427	0.0945206	0.325536
hsa-miR-1227-3p	6.95872	7.81905	0.287797	2.64675	0.877838	5.27464	6.68476	8.10195	14.6954	2.32949	1.22002	0.0947773	0.325884
hsa-miR-106b-3p	7.45225	8.44877	8.49003	22.9385	26.6863	6.23783	6.44386	9.92594	6.0535	-2.05703	-1.04056	0.0976133	0.335086
hsa-miR-655-5p	2.31957	2.15155	1.90666	5.53411	3.7747	5.91677	4.87807	7.67776	6.17875	2.00889	1.0064	0.097783	0.335119
hsa-miR-6892-5p	4.5898	5.56255	4.82061	0.240613	4.82811	4.35731	5.29963	17.5613	8.80889	2.23946	1.16315	0.0980535	0.335497
hsa-miR-4533	7.10678	6.61208	2.23043	6.33615	3.33578	8.21009	9.1539	19.3853	5.42728	2.05712	1.04062	0.0986774	0.337081
hsa-miR-8064	0.592232	0.734676	2.30238	0.240613	0.175568	0.458664	0.481784	0.212093	0.125245	-2.64173	-1.40148	0.099235	0.338434
hsa-miR-6813-3p	42.1472	32.3782	4.56879	8.58188	11.0608	175.668	45.5286	7.25358	12.441	3.04781	1.60777	0.0995908	0.339094
hsa-miR-508-5p	2.61569	3.20109	5.43218	1.68429	3.95027	2.88958	7.22676	11.2409	5.0098	1.93821	0.954723	0.0998931	0.339572
hsa-miR-4688	1.23382	1.15449	2.73408	4.73206	1.31676	1.37599	0.662453	0.89079	1.33595	-2.06895	-1.0489	0.100212	0.340103
hsa-miR-376a-3p	679.783	959.119	0.431696	2.40613	5.53038	1169.73	1475.16	1193.23	1151.46	3.78612	1.92072	0.10062	0.340449
hsa-miR-6737-5p	72.3016	145.676	99.8298	288.495	261.245	495.495	401.808	347.238	683.795	2.77917	1.47465	0.100639	0.340449
hsa-miR-941	109.513	126.469	9.96499	5.93513	13.6065	200.757	239.627	109.822	79.8227	2.96534	1.5682	0.101497	0.342245
hsa-miR-3922-5p	3.55339	2.46641	5.2523	5.61431	4.12584	1.74292	2.16803	1.06046	2.96413	-2.11431	-1.08019	0.101415	0.342245
hsa-miR-188-5p	3.89886	5.87741	3.77734	5.61431	0.438919	3.99038	20.2952	4.15702	5.51078	2.15406	1.10706	0.101981	0.343325
hsa-miR-7977	82.6163	71.8933	34.6796	67.6123	209.452	278.822	335.924	205.348	251.7	2.87458	1.52335	0.102233	0.343622
hsa-miR-2681-5p	2.71439	4.88035	1.94263	2.48634	1.66789	6.78823	5.66096	2.71479	6.59623	1.97082	0.978799	0.102625	0.344384
hsa-miR-5680	2.51698	2.0466	2.80603	5.13308	2.80908	1.65119	0.843122	1.1453	2.12916	-2.07514	-1.05321	0.103236	0.345329
hsa-miR-4520-2-3p	7.55095	8.6062	2.842	8.74228	4.03806	6.10023	3.97472	0.466604	1.66993	-2.08394	-1.05932	0.103102	0.345329
hsa-miR-4783-5p	111.438	89.4205	5.43218	2.24572	2.1946	17.9796	26.1368	4.24186	7.76518	-3.00452	-1.58713	0.104758	0.349862
hsa-miR-6716-5p	1.72734	2.30898	0.899367	0.802044	0.438919	2.38505	1.74647	5.38716	1.37769	2.16807	1.11641	0.105415	0.351494
hsa-miR-7851-3p	12.4862	9.60326	17.8434	38.4981	10.2707	15.5029	7.64832	5.00539	5.13504	-2.12989	-1.09078	0.105593	0.351531
hsa-miR-6856-3p	1.03641	1.46935	3.74137	0.240613	5.61816	0.550397	0.843122	0.212093	2.37965	-2.41781	-1.2737	0.10635	0.352927
hsa-miR-4658	9.08088	7.39924	4.24501	10.988	4.21362	11.9253	15.8387	10.0956	19.7052	2.00418	1.00301	0.106226	0.352927
hsa-miR-2277-3p	1.43123	1.52183	0.107924	0	2.10681	2.06399	2.40892	2.46028	3.04763	2.41491	1.27197	0.107306	0.355535
hsa-miR-718	2.41828	1.41687	4.82061	0.481227	7.37384	3.43998	1.5658	9.16241	14.9041	2.20155	1.13852	0.107528	0.35571
hsa-miR-7108-5p	40.9627	39.62	24.139	42.5886	86.5548	199.565	100.874	83.0131	94.5599	2.55722	1.35457	0.107711	0.355751
hsa-miR-4656	0.987053	1.04954	4.13709	0.240613	3.33578	1.00906	0.662453	0.169674	1.54469	-2.30196	-1.20286	0.108654	0.3583
hsa-miR-4476	7.84707	6.24474	6.36752	19.3293	9.30508	5.4581	4.09517	3.648	6.76322	-1.9551	-0.967246	0.109643	0.358738
hsa-miR-1972	2.86245	3.72586	6.2596	5.93513	2.28238	1.88052	4.09517	1.61191	0.459231	-2.11366	-1.07974	0.109615	0.358738
hsa-miR-6746-5p	3.15857	3.46347	0.935342	11.7901	5.17924	13.8058	17.284	5.13265	5.26029	2.12097	1.08472	0.109472	0.358738
hsa-miR-518c-5p	7.5016	6.3497	2.94992	0.240613	4.56476	16.1908	10.4788	4.75088	6.01175	2.15777	1.10954	0.109579	0.358738
hsa-miR-4749-3p	3.05986	3.77833	1.33106	0.240613	2.10681	1.83466	2.64981	6.02344	8.14092	2.20396	1.1401	0.109099	0.358738
hsa-miR-1182	1.48058	1.41687	3.38162	4.33104	6.14487	1.33013	1.38513	2.20577	1.66993	-2.00269	-1.00194	0.110502	0.360421
hsa-miR-544b	2.22087	3.09613	0.935342	13.0733	7.19827	2.20159	2.83048	3.52074	0.375735	-2.36689	-1.24299	0.110418	0.360421
hsa-miR-3158-3p	13.6707	13.9064	0.647544	0.481227	0.790054	11.3749	9.69591	9.54418	28.8898	2.51561	1.33091	0.110872	0.361066
hsa-miR-646	1.8754	1.3644	3.48954	9.0631	6.40822	1.37599	1.50558	2.33302	3.21462	-2.08511	-1.06013	0.111266	0.361225
hsa-miR-3616-5p	9.377	10.3379	6.2596	13.7952	5.53038	6.51303	4.81784	1.73916	5.42728	-1.9585	-0.969752	0.111179	0.361225
hsa-miR-6501-3p	1.97411	1.83669	0.179873	0.641636	0.526703	2.66025	2.52937	0.805953	3.33986	2.23348	1.15929	0.111642	0.361886
hsa-miR-365a-3p	73.0419	108.68	338.702	867.972	590.961	78.982	128.576	140.957	209.159	-2.83919	-1.50548	0.112157	0.362992
hsa-miR-2110	14.559	19.4164	7.98638	4.25084	8.6906	26.7401	32.942	18.5793	18.578	2.19755	1.1359	0.112932	0.364938
hsa-miR-3940-5p	15.9903	31.2237	17.016	35.8514	47.8422	88.5681	31.1353	74.5294	119.692	2.65608	1.4093	0.113934	0.367609
hsa-miR-4444	0.789642	1.78421	1.90666	5.4539	0.351135	0.871462	0.722676	1.73916	0.25049	-2.2807	-1.18948	0.114795	0.369816
hsa-miR-4524a-3p	4.44174	4.04072	9.06562	8.02044	10.7096	5.27464	3.31227	3.56316	3.08937	-1.89452	-0.92183	0.115412	0.371235
hsa-miR-1268a	8.3406	8.6062	20.3976	7.69963	5.09146	11.9711	14.574	29.9475	28.8898	2.11968	1.08384	0.115815	0.371959
hsa-miR-3977	7.74836	4.77539	7.05104	7.94024	3.7747	15.778	10.2981	13.7012	9.72735	1.96766	0.976482	0.116516	0.373638
hsa-miR-502-5p	2.41828	2.0466	2.15848	1.36348	5.61816	1.05493	0.542007	1.56949	2.21266	-1.985	-0.989143	0.116719	0.373716
hsa-miR-12117	5.82361	3.98824	3.77734	4.09043	4.03806	2.79785	2.46914	2.67237	1.37769	-1.87702	-0.908441	0.117773	0.376513
hsa-miR-4445-5p	2.66504	2.51889	9.92901	1.92491	1.14119	2.56852	1.92714	1.06046	1.62818	-2.04566	-1.03257	0.118337	0.377076
hsa-miR-891a-3p	1.62864	2.09907	2.37433	6.57676	3.248	1.97226	1.26468	2.41786	0.292238	-2.12489	-1.08739	0.118489	0.377076
hsa-miR-1298-5p	0.592232	1.04954	2.73408	0.401022	1.49232	0.412798	0.301115	0.424186	1.00196	-2.34503	-1.22961	0.11815	0.377076
hsa-miR-548n	10.3147	9.91812	1.00729	5.29349	6.58379	12.6133	17.4045	9.88353	14.5702	2.055	1.03914	0.118959	0.377425
hsa-miR-223-5p	0.9377	0.99706	1.33106	2.00511	4.03806	0.458664	0.60223	1.824	0.292238	-2.29599	-1.19911	0.118844	0.377425
hsa-miR-11400	11.203	12.7519	11.6558	5.53411	7.11049	20.7775	25.5948	19.5125	11.773	1.9966	0.997543	0.119593	0.378726
hsa-miR-3166	0.394821	0.787153	0.323772	3.28838	1.84346	0.275199	0.662453	0.0424186	1.08546	-2.52869	-1.33839	0.119731	0.378726
hsa-miR-589-3p	2.96116	4.19815	0.0719494	0.320818	0.614487	6.5589	8.85279	2.12093	0.0834966	2.6764	1.42029	0.120013	0.379045
hsa-miR-7852-3p	2.41828	2.62384	2.19446	2.32593	2.10681	1.33013	1.20446	1.824	0.208741	-2.04977	-1.03546	0.120876	0.381197
hsa-miR-1270	3.25727	2.57137	3.84929	0.882249	2.37016	5.32051	5.29963	5.42958	3.29812	1.82707	0.869534	0.121857	0.383712
hsa-miR-33b-3p	18.9021	17.4748	0.467671	0.240613	6.14487	26.0063	26.3777	17.2644	16.8663	2.49815	1.32086	0.122429	0.384934
hsa-miR-4455	182.111	219.091	2.62615	11.389	22.5604	836.879	235.653	22.6515	65.7118	3.31428	1.7287	0.123029	0.38624
hsa-miR-6853-5p	1.38187	1.31192	1.54691	7.05799	3.07243	9.63195	8.91301	1.86642	2.67189	2.01754	1.01259	0.123985	0.388079
hsa-miR-621	0.493526	0.367338	0.683519	0.160409	0.263351	0.412798	0.120446	0.0848371	0	-2.66489	-1.41408	0.123917	0.388079
hsa-miR-1199-3p	2.36893	2.51889	6.2596	6.89758	5.9693	1.97226	2.22825	3.73283	1.62818	-1.99727	-0.998031	0.124258	0.388352
hsa-miR-606	0.690937	0.0524768	1.11522	0.0802044	0.175568	0.321065	0.240892	0.0848371	4.30007	2.82523	1.49837	0.12461	0.388872
hsa-miR-4666b	21.419	14.5361	28.2042	8.26106	12.1142	38.803	33.9056	28.675	38.9512	2.06598	1.04682	0.127962	0.398739
hsa-miR-4781-3p	4.88591	5.71998	11.1162	5.3737	27.0374	3.11892	3.79405	6.57488	8.30791	-1.97989	-0.985424	0.128651	0.399696
hsa-miR-6784-3p	0.789642	1.46935	8.77782	17.4044	7.46162	0.963195	1.26468	6.27795	4.13308	-2.26498	-1.1795	0.128635	0.399696
hsa-miR-4694-3p	8.3406	6.61208	7.15896	10.6672	9.12952	6.51303	5.66096	1.90884	3.92434	-1.86192	-0.896788	0.130421	0.403278
hsa-miR-577	4.83656	4.04072	0.143899	2.48634	1.66789	7.29276	4.15539	4.53879	4.80105	1.96803	0.976752	0.130701	0.403278
hsa-miR-4280	31.1909	31.4861	3.23772	18.1262	9.48065	80.1286	70.3405	12.9801	20.2897	2.45434	1.29534	0.130275	0.403278
hsa-miR-4663	1.8754	1.73174	3.52552	9.38392	3.95027	3.21065	1.32491	1.10288	2.4214	-2.01382	-1.00993	0.130519	0.403278
hsa-miR-6079	6.66261	7.34676	5.36023	7.94024	8.07611	4.44904	4.75762	3.98735	2.4214	-1.80778	-0.85422	0.130767	0.403278
hsa-miR-380-5p	5.67555	7.08437	2.08653	0.160409	1.05341	5.91677	5.84163	5.09023	10.0196	2.07781	1.05507	0.131387	0.404001
hsa-miR-29b-2-5p	12.3382	15.6906	20.8653	10.8276	11.5875	9.58608	9.27435	2.5027	7.84868	-1.95965	-0.970594	0.131232	0.404001
hsa-miR-377-3p	21.271	35.1595	4.10111	1.60409	8.95395	11.7418	69.6178	15.7373	31.9792	2.26691	1.18073	0.131648	0.40421
hsa-miR-1228-5p	2.22087	2.41393	12.2674	26.8685	3.7747	5.04531	4.03494	3.56316	5.55252	-2.08715	-1.06153	0.132144	0.405139
hsa-miR-6780b-3p	5.28073	6.13979	26.8371	6.25595	7.90054	4.99944	13.49	46.618	27.7209	2.20913	1.14348	0.132771	0.406465
hsa-miR-4800-3p	1.8754	1.31192	1.29509	4.57165	1.84346	0.596264	1.20446	1.86642	0.709721	-1.96351	-0.973435	0.133376	0.407722
hsa-miR-4766-3p	0.345468	0.83963	1.97861	1.68429	0.0877838	0.183466	0	0.0848371	1.2107	-2.63764	-1.39925	0.134597	0.410853
hsa-miR-106a-5p	759.932	767.736	1889.35	3800.09	3361.42	1200.51	1337.25	597.72	565.982	-2.28633	-1.19303	0.134799	0.410871
hsa-miR-6529-5p	1.33252	0.944583	1.04327	3.12797	1.05341	1.23839	0.963568	0.0848371	0.333986	-2.28884	-1.19462	0.135257	0.411668
hsa-miR-4274	1.62864	2.36146	0.827418	1.7645	0.438919	2.47679	2.28848	3.56316	2.67189	1.94059	0.956494	0.137022	0.414292
hsa-miR-6757-5p	20.2346	41.2468	0.575595	0	0.263351	4.72424	4.27584	3.39349	5.46903	-2.79072	-1.48064	0.137061	0.414292
hsa-miR-122-5p	3.30663	8.3963	1.97861	5.69452	8.51503	3.02718	2.46914	4.96297	1.92042	-1.7901	-0.840041	0.137108	0.414292
hsa-miR-124-5p	4.24433	2.57137	5.18035	2.24572	0.877838	8.39356	6.98587	4.83572	2.63014	1.86023	0.895485	0.136505	0.414292
hsa-miR-670-5p	3.45468	3.93576	14.21	24.703	25.984	4.12798	3.25204	5.64167	15.3216	-2.03543	-1.02534	0.136895	0.414292
hsa-miR-31-3p	827.94	1043.13	178.938	809.423	799.359	340.742	494.552	166.154	211.914	-2.41237	-1.27045	0.137613	0.41462
hsa-miR-4276	6.90937	6.55961	5.57608	2.72695	4.47697	9.95301	8.79256	9.3745	10.1448	1.79305	0.842418	0.137461	0.41462
hsa-miR-518a-3p	2.02346	2.20403	1.40301	6.01533	1.93124	2.15572	1.26468	1.52707	0.709721	-1.89811	-0.924562	0.138369	0.416301
hsa-miR-1180-3p	193.758	197.68	4.42489	13.4743	67.5935	300.654	325.505	195.38	263.348	2.84303	1.50743	0.138934	0.417399
hsa-miR-3170	12.6836	15.6906	3.92124	9.0631	3.86249	48.6643	17.7658	8.61097	3.6321	2.1719	1.11896	0.139483	0.418449
hsa-miR-4800-5p	2.17152	1.94164	3.20175	11.3088	5.4426	2.20159	2.3487	0.212093	3.96609	-2.19642	-1.13516	0.139778	0.418626
hsa-miR-2116-5p	3.80015	4.56549	6.61934	1.44368	0.965622	4.17384	6.08253	6.4052	10.8128	1.94974	0.963284	0.139942	0.418626
hsa-miR-6768-3p	6.02102	6.92694	4.46086	11.1484	6.14487	4.58664	6.38364	3.26623	1.2942	-1.78969	-0.839709	0.143018	0.419024
hsa-miR-6082	1.52993	1.3644	3.23772	2.88736	0.790054	0.779729	1.5658	1.35739	0.50098	-1.89848	-0.924843	0.141293	0.419024
hsa-miR-888-5p	2.27022	3.6209	3.4176	0.0802044	6.75935	1.19253	2.22825	1.27256	1.41944	-2.11361	-1.07971	0.140745	0.419024
hsa-miR-217-5p	1.38187	2.2565	0.0719494	2.80716	1.84346	0.550397	0.843122	0.212093	1.2107	-2.35333	-1.2347	0.143277	0.419024
hsa-miR-224-5p	19.3956	24.0869	2.37433	7.53922	5.61816	26.098	36.9167	17.3916	20.5402	2.1349	1.09417	0.141157	0.419024
hsa-miR-3622a-3p	0.9377	1.10201	3.38162	4.17063	0.263351	0.550397	0.662453	1.31498	1.2942	-2.05685	-1.04044	0.143125	0.419024
hsa-miR-6847-5p	1.67799	2.78127	1.69081	10.587	0.175568	2.61439	1.68624	0.0424186	1.2942	-2.39508	-1.26007	0.142884	0.419024
hsa-miR-4650-5p	5.23138	5.56255	4.53281	4.97268	15.7133	4.72424	6.26319	3.30865	0.25049	-1.97952	-0.985153	0.142049	0.419024
hsa-miR-6128	2.61569	3.14861	0.827418	2.48634	1.49232	1.05493	1.62602	0.805953	1.04371	-1.87761	-0.908895	0.142699	0.419024
hsa-miR-4794	2.41828	2.0466	0.53962	0.0802044	5.61816	5.8709	3.79405	3.18139	5.09329	2.10295	1.07241	0.141836	0.419024
hsa-miR-134-3p	3.25727	3.30604	15.8289	1.92491	1.31676	3.71518	3.49294	31.3049	6.09525	2.16533	1.11459	0.142301	0.419024
hsa-miR-10400-5p	16.8786	19.5739	18.6349	18.2866	13.8698	13.8517	14.2126	39.4068	74.3955	2.03208	1.02296	0.141727	0.419024
hsa-miR-656-5p	3.84951	3.09613	1.87068	0.561431	4.03806	4.90771	6.08253	4.32669	4.55056	1.84484	0.883498	0.140971	0.419024
hsa-miR-188-3p	1.57928	1.52183	2.48225	6.89758	3.16022	0.963195	1.14424	2.41786	1.71168	-1.97611	-0.982662	0.141314	0.419024
hsa-miR-183-3p	0.888347	0.472292	5.57608	5.77472	1.22897	0.458664	0.843122	2.67237	1.2107	-2.14458	-1.1007	0.142654	0.419024
hsa-miR-1178-3p	0.789642	0.99706	4.96451	0.240613	0.526703	7.70556	4.33606	0.254511	1.71168	2.2926	1.19698	0.142973	0.419024
hsa-miR-4480	2.61569	3.14861	11.7637	7.45901	0.614487	3.43998	2.83048	33.6379	5.38553	2.20583	1.14132	0.143985	0.420509
hsa-miR-4485-3p	11.203	22.8274	8.3821	10.3464	12.992	4.12798	15.2364	3.60558	4.00784	-1.95584	-0.967787	0.14445	0.421278
hsa-miR-5587-3p	12.3382	6.97942	13.3826	2.00511	4.91589	8.80635	10.9606	24.4331	17.3255	1.93212	0.950188	0.145609	0.423413
hsa-miR-589-5p	10.7095	11.9647	1.36704	1.28327	0.351135	12.7967	18.2476	8.61097	5.30203	2.18069	1.12479	0.145991	0.423413
hsa-miR-6832-5p	1.48058	1.83669	2.51823	0.72184	0.614487	3.53171	1.32491	2.9693	3.59035	1.9297	0.948378	0.145929	0.423413
hsa-miR-6883-3p	1.48058	1.83669	1.58289	6.57676	2.1946	0.596264	0.903345	2.79963	1.1272	-1.98817	-0.991439	0.145766	0.423413
hsa-miR-4492	7.60031	7.60914	16.2606	24.8634	26.2474	4.72424	5.60074	9.88353	14.0274	-1.92379	-0.943953	0.147466	0.427101
hsa-miR-4660	1.23382	1.25944	5.5401	5.77472	5.53038	0.596264	1.44535	3.52074	2.08741	-2.01056	-1.00759	0.148024	0.428125
hsa-miR-7978	9.91988	9.49831	3.92124	9.78494	11.3241	23.9423	24.5108	8.31404	9.47686	1.86519	0.899323	0.148556	0.428904
hsa-miR-1206	0.789642	1.3644	3.99319	5.69452	0.614487	6.60477	3.9145	3.09656	5.92826	1.95776	0.969205	0.148703	0.428904
hsa-miR-924	5.03397	6.76951	1.58289	0.882249	3.33578	10.1365	9.09368	2.54511	5.38553	1.91946	0.940703	0.149371	0.430239
hsa-miR-548aj-5p	3.70145	3.04366	9.13757	0	0.526703	2.47679	8.49145	10.8167	7.68169	2.22923	1.15655	0.150442	0.432727
hsa-miR-3145-3p	0.838995	0.367338	0.575595	0.160409	0.175568	0.596264	0.421561	2.24818	0.626224	2.18562	1.12804	0.150918	0.432908
hsa-miR-3202	9.47571	8.23886	317.513	248.473	39.2394	6.87996	5.96208	40.637	122.782	-2.82705	-1.4993	0.150861	0.432908
hsa-miR-6760-5p	1.13511	1.62678	5.2523	2.64675	2.1946	1.05493	0.722676	1.78158	1.79518	-1.91966	-0.94085	0.152879	0.435376
hsa-miR-154-3p	45.8486	64.4416	0	0	0.70227	86.6417	111.473	50.775	65.9206	3.54372	1.82526	0.152268	0.435376
hsa-miR-5579-5p	2.02346	1.94164	1.47496	2.72695	1.22897	1.00906	2.22825	0.212093	0.375735	-1.99737	-0.998104	0.15323	0.435376
hsa-miR-483-3p	3.30663	3.51595	25.1103	29.5152	26.2474	58.0669	56.7301	23.8817	15.7809	2.20211	1.13888	0.153442	0.435376
hsa-miR-488-5p	0.345468	0.524768	1.58289	0	0.0877838	0.275199	0.421561	0.0848371	0	-2.70831	-1.43739	0.15261	0.435376
hsa-miR-657	3.50404	1.88917	14.282	0.240613	2.80908	10.7327	6.32342	16.6281	5.55252	2.14612	1.10173	0.152802	0.435376
hsa-miR-6076	1.13511	1.20697	2.30238	0.481227	1.40454	0.871462	1.98736	2.20577	5.0098	1.89811	0.924564	0.152401	0.435376
hsa-miR-4651	5.03397	3.67338	2.4103	17.9658	4.38919	22.1076	18.0067	10.2653	4.09133	2.03812	1.02724	0.153344	0.435376
hsa-miR-6507-3p	2.61569	1.88917	3.88527	9.86515	2.63351	2.24745	1.68624	3.90251	0.584476	-1.97479	-0.981697	0.154813	0.437487
hsa-miR-148a-3p	91.2037	90.1027	87.4185	89.9092	52.9336	175.623	215.358	148.507	260.259	2.42711	1.27924	0.154566	0.437487
hsa-miR-2277-5p	5.33008	3.93576	3.23772	2.08532	6.23265	5.7333	4.57695	12.1317	7.76518	1.8189	0.86307	0.154609	0.437487
hsa-miR-208a-3p	2.02346	2.30898	2.48225	1.44368	3.33578	1.51359	1.44535	0.212093	1.58644	-1.95344	-0.966016	0.155851	0.439829
hsa-miR-3168	0.789642	0.99706	2.30238	0	0.614487	0.412798	0.963568	0.127256	0.166993	-2.32426	-1.21677	0.15634	0.440615
hsa-miR-4277	1.8754	1.41687	1.58289	2.72695	3.86249	2.01812	0.843122	6.49004	8.30791	1.94107	0.956852	0.156716	0.441081
hsa-miR-10399-3p	5.72491	7.7141	3.34565	12.0307	3.248	19.6308	11.2015	7.55051	8.72539	1.83908	0.878982	0.157236	0.44195
hsa-miR-25-5p	8.63671	6.19227	16.4764	54.2984	47.491	10.7327	10.7197	19.258	10.8963	-2.06016	-1.04276	0.157822	0.443002
hsa-miR-6854-3p	1.28317	1.04954	0.0359747	0.160409	1.58011	2.93545	2.40892	2.5027	0	2.3778	1.24963	0.158778	0.44461
hsa-miR-4497	7.99513	6.13979	6.33154	0.72184	1.66789	3.85278	2.89071	14.083	15.7391	1.99004	0.992801	0.158819	0.44461
hsa-miR-4716-5p	5.08332	5.24768	4.42489	4.65186	0.526703	4.81597	3.9145	6.87181	15.1546	1.92005	0.941146	0.15952	0.445974
hsa-miR-518e-3p	1.08576	1.41687	0.935342	0.0802044	2.80908	0.458664	0.542007	0.212093	1.08546	-2.17723	-1.12249	0.160081	0.446352
hsa-miR-154-5p	237.88	278.337	17.5556	157.281	233.154	579.889	724.965	250.142	266.73	2.4639	1.30094	0.15996	0.446352
hsa-miR-371b-3p	3.20792	1.57431	2.77005	22.1364	22.9116	4.99944	2.16803	9.33208	4.09133	-2.03683	-1.02633	0.160455	0.446799
hsa-miR-499b-5p	1.92475	0.83963	3.99319	0.0802044	3.248	1.14666	0.843122	1.01805	1.00196	-2.01675	-1.01203	0.161688	0.449636
hsa-miR-889-5p	9.17959	11.44	6.47544	13.3139	15.8011	16.8788	19.2714	15.61	31.8957	1.87022	0.903207	0.162427	0.450492
hsa-miR-3064-5p	7.20548	9.02602	6.2596	5.3737	14.3088	29.2628	21.3792	5.13265	7.51469	1.87667	0.908171	0.162282	0.450492
hsa-miR-216b-3p	0.789642	0.99706	0.935342	0.0802044	1.93124	0.412798	0.60223	0.551441	0.166993	-2.18516	-1.12774	0.16318	0.450506
hsa-miR-4744	2.71439	2.83375	5.32425	4.25084	0.614487	1.51359	1.02379	1.99367	2.29616	-1.84967	-0.887266	0.163292	0.450506
hsa-miR-7847-3p	11.4005	8.71116	2.08653	6.97779	7.19827	14.3103	52.2736	1.824	0.125245	2.35255	1.23422	0.162703	0.450506
hsa-miR-6512-3p	3.7508	4.19815	5.28828	1.68429	5.88152	3.11892	4.09517	10.7743	12.3157	1.81894	0.863095	0.163006	0.450506
hsa-miR-4764-5p	2.66504	3.14861	6.58337	4.97268	7.0227	2.84372	2.40892	3.13897	2.46315	-1.78517	-0.836065	0.163914	0.451627
hsa-miR-891b	0.690937	0.104954	1.04327	6.17574	1.75568	0.0917328	0.361338	0.59386	2.12916	-2.43063	-1.28133	0.16421	0.451846
hsa-miR-1293	25.9595	32.1158	14.4618	27.6705	20.1025	134.893	41.7346	18.8763	24.715	2.2877	1.1939	0.164778	0.452814
hsa-miR-100-5p	36022.4	43515.3	18493.8	39260.5	32511.7	87154	105057	35911.7	39761.3	1.97201	0.979668	0.1654	0.453215
hsa-miR-136-3p	12.4862	12.3321	2.5542	0.0802044	0.438919	9.63195	23.9085	8.61097	8.76714	2.27491	1.18581	0.165268	0.453215
hsa-miR-5708	1.38187	1.15449	1.25911	3.28838	0.351135	0.779729	0.481784	0.0424186	1.33595	-2.23588	-1.16084	0.165784	0.453215
hsa-miR-450b-5p	5.77426	7.7141	0.467671	3.6092	0.790054	4.40318	9.81635	6.06586	8.6419	1.96311	0.973138	0.165789	0.453215
hsa-miR-1252-3p	2.96116	1.83669	1.83471	2.16552	4.38919	1.10079	2.22825	0.29693	2.08741	-1.8435	-0.882449	0.166563	0.454737
hsa-miR-4324	19.4943	31.7485	83.0296	290.18	257.294	27.1988	35.2907	42.1641	122.865	-2.39654	-1.26096	0.167378	0.456367
hsa-let-7c-3p	5.97167	6.50713	2.94992	0.641636	2.01903	2.70612	4.87807	3.81767	16.6576	1.92924	0.948036	0.167637	0.456478
hsa-miR-659-3p	8.19254	5.77245	28.3121	6.41636	3.42357	5.41224	3.61338	10.3077	2.5049	-1.91318	-0.935973	0.168535	0.458328
hsa-miR-6746-3p	5.47814	7.0319	14.0301	3.12797	8.60281	5.7333	6.50409	35.9709	11.0633	1.93215	0.950208	0.169811	0.458819
hsa-miR-5011-5p	7.69901	12.1746	0.251823	2.16552	0.351135	1.28426	1.50558	2.16335	3.21462	-2.21781	-1.14913	0.169525	0.458819
hsa-miR-4733-3p	5.33008	6.13979	3.2737	0.0802044	6.14487	7.01756	17.7658	5.89618	3.42336	2.0272	1.01949	0.169806	0.458819
hsa-miR-6869-3p	21.5671	28.4949	1.51094	0.240613	0.877838	14.6773	18.0067	23.3726	46.0901	2.42014	1.27509	0.169708	0.458819
hsa-miR-520e-5p	1.82605	1.41687	3.48954	0	0.438919	1.37599	0.60223	0.339349	0.208741	-2.29691	-1.1997	0.169454	0.458819
hsa-miR-4643	3.60274	4.88035	11.1522	11.6296	12.2897	2.93545	4.93829	9.62901	1.33595	-1.8466	-0.884875	0.170784	0.458948
hsa-miR-3942-5p	1.8754	1.04954	0.683519	0.0802044	0.263351	1.00906	1.62602	0.805953	3.46511	2.1225	1.08576	0.170303	0.458948
hsa-miR-7110-3p	5.33008	4.61796	4.89256	4.57165	3.51135	6.23783	5.54052	8.9079	11.3138	1.73699	0.796591	0.170088	0.458948
hsa-miR-591	4.54044	4.25062	1.54691	6.73717	5.70595	1.78879	3.37249	3.01172	1.75343	-1.82443	-0.867448	0.171283	0.458948
hsa-miR-3160-5p	0.345468	0.787153	3.02187	3.20818	1.84346	0.596264	0.481784	12.7256	2.67189	2.23534	1.16049	0.171393	0.458948
hsa-miR-184	2.22087	2.83375	2.08653	3.84981	7.37384	1.65119	0.843122	4.62362	0.709721	-1.85701	-0.89298	0.171122	0.458948
hsa-miR-450a-2-3p	1.28317	1.41687	5.64803	4.41124	4.47697	2.01812	1.02379	1.95125	2.5049	-1.82613	-0.868792	0.171022	0.458948
hsa-miR-329-3p	17.2734	22.1452	17.4837	6.25595	13.9576	23.2543	34.2067	27.869	28.3888	1.83632	0.876815	0.172564	0.460721
hsa-miR-6851-3p	2.12216	2.30898	0.899367	0	1.22897	1.51359	1.44535	3.26623	4.21658	1.97019	0.978331	0.172935	0.460721
hsa-miR-1271-3p	8.48865	7.97648	1.04327	3.36859	1.22897	10.2741	8.55167	8.65339	6.26224	1.90028	0.926208	0.172919	0.460721
hsa-miR-5590-5p	1.38187	1.25944	2.73408	2.40613	0.790054	0.504531	0.903345	1.86642	0.0417483	-2.07416	-1.05252	0.17278	0.460721
hsa-miR-1225-5p	0.888347	1.52183	2.94992	0.561431	2.10681	1.14666	1.02379	0.848371	0.0417483	-2.11798	-1.08269	0.173521	0.461694
hsa-miR-4727-3p	4.04692	2.88623	5.14438	3.04777	4.12584	4.86184	7.22676	8.69581	5.71952	1.70162	0.766908	0.17388	0.462061
hsa-miR-6840-5p	14.2136	11.8073	3.09382	0.481227	1.84346	7.33863	5.60074	14.4647	24.7567	2.06843	1.04853	0.17426	0.462485
hsa-miR-342-5p	23.788	20.0986	23.9232	46.5186	33.3578	57.7	29.8706	88.7821	86.252	2.22578	1.15431	0.174508	0.462556
hsa-miR-6757-3p	9.377	9.81317	4.42489	3.76961	2.7213	3.85278	4.57695	4.15702	1.62818	-1.70524	-0.769978	0.175487	0.463977
hsa-miR-6753-3p	5.82361	5.6675	8.77782	8.42147	6.32043	3.57758	4.93829	3.81767	4.00784	-1.72845	-0.789482	0.175348	0.463977
hsa-miR-219a-1-3p	1.43123	1.25944	57.3077	7.61942	7.19827	2.79785	4.09517	6.53246	14.0692	-2.17778	-1.12286	0.177199	0.467914
hsa-miR-4519	9.13024	5.03778	5.18035	17.9658	7.37384	6.78823	7.10632	2.71479	3.42336	-1.78256	-0.833951	0.177826	0.468788
hsa-miR-2392	83.9982	124.108	4.49684	3.20818	7.11049	99.3925	86.1792	148.507	105.874	2.46616	1.30227	0.178253	0.468788
hsa-miR-1295b-3p	1.82605	2.83375	0.179873	5.53411	4.56476	1.05493	1.5658	0.551441	2.83888	-1.97303	-0.980416	0.178069	0.468788
hsa-miR-3124-5p	4.83656	4.19815	3.45357	5.13308	3.42357	9.31088	7.34721	3.73283	8.76714	1.73159	0.792094	0.178426	0.468788
hsa-miR-6794-3p	0.987053	0.524768	1.72678	2.48634	2.37016	0.64213	0.722676	0.466604	1.37769	-1.97438	-0.981398	0.179134	0.469471
hsa-miR-1226-5p	0.9377	0.99706	1.97861	4.97268	2.98465	1.14666	1.02379	2.07851	0.751469	-1.86851	-0.90189	0.179083	0.469471
hsa-miR-548ao-3p	2.71439	3.98824	2.26641	1.04266	7.28606	2.75199	1.98736	1.31498	1.58644	-1.80117	-0.848934	0.179733	0.470038
hsa-miR-4789-3p	2.76375	1.41687	1.65484	1.36348	0.263351	1.14666	4.4565	6.57488	0.25049	2.05841	1.04153	0.180869	0.470038
hsa-miR-5707	1.82605	2.46641	1.04327	0	0.263351	3.16478	2.64981	0.424186	3.08937	2.04715	1.03361	0.180646	0.470038
hsa-miR-629-5p	8.53801	8.76363	2.23043	0.401022	7.72498	7.38449	8.13011	12.3438	15.0294	1.93631	0.953312	0.180224	0.470038
hsa-miR-6873-3p	5.87296	4.82787	6.90714	2.32593	14.5721	7.15516	5.54052	10.9864	28.3053	1.88625	0.915519	0.180572	0.470038
hsa-miR-449c-3p	1.82605	0.83963	3.63344	0.160409	2.80908	0.596264	1.5658	0.169674	1.33595	-2.03709	-1.02651	0.18023	0.470038
hsa-miR-4664-3p	3.55339	4.88035	16.0087	36.092	14.6599	2.52265	1.38513	12.1741	13.4847	-2.03089	-1.02211	0.180922	0.470038
hsa-miR-4774-3p	1.57928	1.10201	16.6923	0	13.0798	1.42186	0.903345	5.85376	3.50686	-2.21952	-1.15025	0.181192	0.470157
hsa-miR-7150	2.22087	2.09907	5.684	0.320818	2.80908	1.88052	2.40892	0.721116	0.459231	-1.94301	-0.958293	0.181444	0.470228
hsa-miR-3650	1.67799	1.78421	2.94992	6.89758	4.74033	3.02718	1.80669	1.48465	1.75343	-1.76776	-0.82192	0.1818	0.470568
hsa-miR-4732-3p	2.02346	3.14861	5.07243	14.4368	17.3812	3.25652	2.28848	4.32669	8.18267	-1.85438	-0.890933	0.182207	0.470832
hsa-miR-6727-5p	4.63915	4.35558	0.61157	5.53411	1.49232	3.34825	4.75762	6.15069	10.2701	1.84504	0.883648	0.182352	0.470832
hsa-miR-3184-5p	72.6964	90.4701	107.241	328.437	243.337	54.26	60.5844	74.1052	119.024	-2.1869	-1.12889	0.182832	0.471491
hsa-miR-3189-3p	7.10678	7.39924	3.16577	5.85492	6.23265	2.79785	4.03494	3.09656	4.17483	-1.6826	-0.750689	0.18345	0.471921
hsa-miR-645	2.51698	2.30898	0.791443	0.72184	2.7213	1.05493	2.04758	0.0424186	0	-2.31776	-1.21273	0.183339	0.471921
hsa-miR-5197-5p	1.57928	1.04954	1.90666	0.240613	0.263351	0.733863	0.722676	0.339349	0.25049	-2.05148	-1.03667	0.183811	0.471984
hsa-miR-501-5p	4.93526	5.09025	2.77005	3.6092	1.31676	1.19253	1.50558	1.35739	3.84084	-1.79739	-0.8459	0.183925	0.471984
hsa-miR-6778-3p	2.71439	1.46935	13.5984	16.0409	8.60281	2.47679	2.40892	3.13897	9.72735	-1.90793	-0.93201	0.18551	0.475469
hsa-miR-556-3p	2.36893	3.09613	1.00729	0.240613	0.70227	0.183466	1.20446	5.21748	5.92826	2.09497	1.06693	0.186349	0.477035
hsa-miR-944	2.12216	2.09907	2.77005	1.28327	0.351135	0.871462	0.963568	4.36911	7.3477	1.94268	0.958047	0.186945	0.477502
hsa-miR-140-3p	8.58736	11.8598	19.6422	20.9334	11.4119	9.03569	14.574	6.74455	1.66993	-1.81256	-0.858028	0.18735	0.477502
hsa-miR-3661	3.40533	5.40512	2.15848	0.240613	4.82811	3.30238	2.89071	8.56855	8.93414	1.84491	0.883552	0.187313	0.477502
hsa-miR-3064-3p	0.9377	1.15449	2.37433	2.88736	10.973	2.56852	1.14424	1.23014	2.58839	-1.92721	-0.94651	0.187444	0.477502
hsa-miR-6880-3p	1.92475	1.25944	4.38891	20.5323	3.68692	1.51359	6.98587	2.16335	2.63014	-1.91177	-0.934906	0.18784	0.477931
hsa-miR-22-3p	9739.5	12496.6	15648.7	39548.7	39963.1	10359.7	13771.6	9039.18	15930.7	-1.91272	-0.935628	0.188555	0.479169
hsa-miR-4508	3.70145	3.41099	3.95722	5.53411	2.89687	6.37543	10.1175	4.7933	4.59231	1.65006	0.722517	0.190594	0.483762
hsa-miR-196b-3p	2.66504	1.78421	4.02916	1.8447	2.01903	0.687996	1.08401	2.46028	1.37769	-1.77149	-0.824966	0.191602	0.485732
hsa-miR-935	6.26778	7.39924	1.22314	0.401022	0.614487	0.779729	0.060223	3.26623	1.87867	-2.12382	-1.08666	0.192063	0.486312
hsa-miR-6767-5p	1.33252	0.944583	0.647544	0.0802044	2.54573	0.917328	0.301115	6.74455	1.33595	2.09847	1.06934	0.193279	0.4888
hsa-miR-186-5p	19.4449	26.2384	19.3544	19.6501	23.2627	7.47623	16.3807	7.50809	15.9478	-1.82752	-0.869884	0.194594	0.48976
hsa-miR-3130-5p	36.4222	38.1507	30.9742	27.9111	17.6445	76.1383	45.4684	81.5709	61.203	2.18305	1.12634	0.194269	0.48976
hsa-miR-6069	50.6358	50.5352	9.28147	4.09043	4.56476	146.773	56.3085	7.63534	20.9159	2.42926	1.28052	0.194364	0.48976
hsa-miR-4762-3p	5.57685	4.72292	6.87117	3.93002	1.58011	9.58608	10.1777	3.86009	8.97588	1.77593	0.828576	0.194053	0.48976
hsa-miR-890	9.77182	9.18345	10.6845	2.08532	18.6102	14.9066	10.539	21.379	27.4286	1.84473	0.883413	0.195146	0.490558
hsa-miR-6786-5p	1.28317	1.67926	0.755468	0.240613	3.95027	5.41224	2.40892	3.56316	0.709721	1.92183	0.942483	0.195452	0.490739
hsa-miR-875-3p	15.5954	12.5944	1.54691	1.92491	2.63351	17.2458	14.0922	9.92594	10.5623	1.88353	0.913439	0.195785	0.490986
hsa-miR-28-3p	222.679	269.311	104.039	268.524	337.265	645.708	834.932	289.592	280.256	2.13284	1.09278	0.196088	0.491081
hsa-miR-4312	2.61569	1.78421	3.95722	2.80716	12.992	2.01812	1.68624	2.46028	4.59231	-1.78145	-0.833055	0.196327	0.491081
hsa-miR-4767	13.0291	12.3321	17.4477	5.85492	5.4426	5.91677	4.09517	7.63534	7.38945	-1.73527	-0.795162	0.196526	0.491081
hsa-miR-4423-3p	0.345468	0.577245	1.15119	0.401022	0.438919	0.779729	0.060223	0.212093	0	-2.225	-1.15381	0.198832	0.496249
hsa-miR-5702	1.52993	1.78421	3.59747	3.12797	0.70227	1.51359	1.44535	1.01805	0.876714	-1.79966	-0.847727	0.19985	0.497921
hsa-miR-31-5p	2945.51	3813.91	1453.27	6039.47	5397.56	2471.65	2935.45	1232.56	1588.36	-1.91051	-0.933957	0.199977	0.497921
hsa-miR-5195-5p	33.4117	50.5352	7.33884	11.0682	49.8612	93.5675	100.994	43.8608	33.1899	2.23049	1.15736	0.200592	0.498858
hsa-miR-5088-5p	2.02346	1.83669	2.73408	0.561431	2.89687	0.917328	1.14424	1.86642	0.626224	-1.77479	-0.827648	0.201355	0.499314
hsa-miR-11181-3p	4.44174	3.6209	5.03646	10.587	5.4426	4.77011	6.50409	0.975627	0.333986	-1.85457	-0.891087	0.20149	0.499314
hsa-miR-3187-3p	20.3333	16.5302	13.9942	8.34126	33.9723	15.9156	16.8624	46.8301	59.1156	1.86256	0.897289	0.20129	0.499314
hsa-miR-5003-5p	0.444174	0.367338	0.575595	0.240613	0.0877838	0.779729	0.240892	2.07851	0.0417483	2.19419	1.13369	0.202842	0.500296
hsa-miR-3137	4.93526	6.24474	12.9149	9.62453	16.0644	8.66875	5.05873	5.68409	3.92434	-1.70213	-0.767339	0.202836	0.500296
hsa-miR-6505-3p	1.72734	0.787153	4.13709	0	7.46162	1.14666	1.20446	0.805953	2.37965	-2.03258	-1.02332	0.202633	0.500296
hsa-miR-6844	3.10922	2.62384	2.87797	1.7645	5.35481	1.92639	2.10781	10.2229	8.09917	1.78226	0.833711	0.202287	0.500296
hsa-miR-7-1-3p	28.97	35.4743	10.4327	34.0067	45.0331	55.4066	72.2074	80.0438	49.43	2.09054	1.06387	0.204589	0.502848
hsa-miR-10523-5p	2.61569	4.04072	0.863392	1.92491	0.614487	3.66931	3.37249	1.99367	5.30203	1.76745	0.821667	0.205073	0.502848
hsa-miR-4742-3p	1.48058	1.52183	0.215848	0	0.526703	0.733863	0.421561	1.1453	4.30007	2.17452	1.1207	0.204217	0.502848
hsa-miR-27b-5p	12.7823	12.6469	6.83519	23.4999	17.3812	18.3466	19.6327	25.4087	42.0823	1.8084	0.854715	0.204743	0.502848
hsa-miR-4760-5p	1.23382	1.67926	0.61157	1.12286	0.614487	0.504531	0.481784	0.212093	1.00196	-1.90598	-0.930531	0.205077	0.502848
hsa-miR-105-5p	14.411	15.2183	36.2265	13.6348	5.61816	10.1823	17.7056	50.0115	51.0999	1.8915	0.919534	0.20568	0.503736
hsa-miR-3197	3.45468	4.19815	0.107924	0.561431	0.614487	2.10986	1.68624	1.18772	9.72735	2.0459	1.03273	0.206618	0.505215
hsa-miR-6721-5p	2.96116	2.2565	6.54739	0.320818	0.526703	1.78879	2.46914	0.721116	0.0834966	-2.01338	-1.00962	0.207008	0.505215
hsa-miR-6742-5p	5.08332	6.87447	1.69081	2.08532	3.07243	15.5029	4.81784	3.26623	3.50686	1.79537	0.844285	0.206785	0.505215
hsa-miR-497-3p	3.55339	3.88329	2.4103	0	1.84346	3.43998	3.01115	4.53879	7.22246	1.93314	0.950943	0.209209	0.50827
hsa-miR-4717-3p	2.41828	1.52183	0.827418	0.481227	3.86249	5.04531	4.15539	0.975627	2.92238	1.80278	0.85022	0.209288	0.50827
hsa-miR-873-3p	1.48058	2.15155	0.467671	2.24572	3.33578	0.963195	1.92714	0.763534	0.375735	-1.91641	-0.938409	0.209341	0.50827
hsa-miR-298	2.31957	2.15155	1.22314	3.93002	2.63351	6.78823	9.09368	0.763534	1.37769	1.83811	0.878224	0.209043	0.50827
hsa-miR-4633-3p	0.987053	0.83963	0.107924	0.160409	0.0877838	0.687996	0.361338	1.01805	1.62818	2.05185	1.03693	0.209473	0.50827
hsa-miR-3156-5p	4.5898	2.41393	3.1298	6.57676	5.4426	4.54078	4.63717	6.49004	14.5702	1.71814	0.780844	0.21075	0.508345
hsa-miR-4438	1.13511	1.20697	1.65484	4.41124	4.47697	1.19253	0.903345	0.805953	2.63014	-1.82895	-0.871014	0.210961	0.508345
hsa-miR-451b	2.41828	4.19815	1.87068	11.7901	3.16022	2.47679	1.5658	1.52707	4.55056	-1.83842	-0.878466	0.2098	0.508345
hsa-miR-6798-5p	0.690937	1.10201	1.47496	0.320818	0.438919	0.779729	0.60223	0.169674	0.125245	-2.01038	-1.00747	0.210953	0.508345
hsa-miR-6716-3p	3.10922	3.25356	3.2737	6.33615	3.16022	0.687996	1.44535	2.88446	3.7156	-1.73665	-0.796311	0.210123	0.508345
hsa-miR-219a-2-3p	5.33008	4.88035	4.60476	5.61431	2.54573	2.93545	4.6974	1.65432	1.79518	-1.68173	-0.749946	0.210373	0.508345
hsa-miR-4738-3p	3.15857	2.30898	3.45357	0.401022	2.45795	1.46773	1.02379	0.678697	2.21266	-1.76183	-0.817071	0.211216	0.508374
hsa-miR-4746-3p	0.789642	0.787153	0.143899	0.0802044	0.438919	1.42186	1.02379	0.466604	0.751469	1.98707	0.990642	0.212083	0.509876
hsa-miR-7515	3.7508	3.04366	14.6057	1.36348	5.9693	6.65063	14.8149	12.1741	7.55644	1.78208	0.83356	0.212467	0.509962
hsa-miR-10525-3p	20.7281	28.9672	1.58289	1.60409	3.51135	4.26558	7.94944	7.21116	3.92434	-1.93412	-0.951676	0.212606	0.509962
hsa-miR-622	1.52993	1.10201	1.15119	0.641636	0.526703	1.78879	1.50558	0.169674	4.04958	1.86562	0.899658	0.214178	0.51139
hsa-miR-4301	3.89886	1.67926	2.05056	0.160409	3.51135	1.33013	6.50409	6.53246	2.21266	1.82552	0.868311	0.214181	0.51139
hsa-miR-185-3p	2.12216	2.36146	4.85658	0.320818	0.438919	3.30238	1.86691	4.53879	5.17679	1.81257	0.858038	0.213521	0.51139
hsa-miR-630	8.53801	9.07849	2.12251	0	3.33578	12.4757	6.56431	6.02344	10.6458	1.92914	0.947959	0.214383	0.51139
hsa-miR-607	6.61325	7.29428	4.02916	8.82249	7.63719	18.3924	16.6216	3.90251	8.14092	1.71188	0.775581	0.214422	0.51139
hsa-miR-3923	2.07281	2.0466	0.359747	4.41124	0.70227	1.14666	1.08401	0.254511	1.41944	-1.95413	-0.966524	0.216086	0.51477
hsa-miR-610	1.08576	1.31192	2.51823	0.962453	1.14119	1.10079	1.44535	1.824	5.55252	1.74299	0.80156	0.216596	0.514816
hsa-miR-374c-5p	4.63915	6.40218	0.647544	9.54433	0.438919	7.06343	11.081	9.45934	4.46707	1.8489	0.88667	0.21656	0.514816
hsa-miR-4425	23.0477	33.0604	14.6777	6.09554	7.72498	52.8381	22.2223	32.1957	18.7867	1.85886	0.894414	0.218476	0.517521
hsa-miR-3912-5p	1.43123	0.892106	5.57608	1.7645	0.263351	0.596264	1.14424	0.89079	1.62818	-1.88651	-0.91572	0.218237	0.517521
hsa-miR-147a	3.30663	2.83375	2.80603	4.97268	8.60281	3.80691	4.4565	18.3672	4.34182	1.72859	0.789598	0.218012	0.517521
hsa-miR-129-5p	4.04692	4.40805	6.79922	7.2184	12.1142	20.4106	13.6706	6.87181	6.47099	1.71914	0.781687	0.219424	0.51918
hsa-miR-6726-3p	0.789642	1.15449	2.23043	0.802044	3.248	0.596264	1.20446	0.339349	1.2942	-1.91207	-0.935135	0.220105	0.520204
hsa-miR-140-5p	406.814	377.466	248.981	489.488	597.544	1292.42	713.101	762.856	531.414	1.9456	0.960213	0.220981	0.521098
hsa-miR-4537	2.22087	2.20403	8.0943	1.12286	1.75568	1.55946	1.68624	2.2906	1.58644	-1.75086	-0.808062	0.220915	0.521098
hsa-miR-129-1-3p	4.88591	4.77539	8.0943	2.08532	14.221	6.46717	10.2379	14.0405	15.9896	1.71771	0.780486	0.221817	0.522438
hsa-miR-3659	2.8131	3.20109	0.61157	0.0802044	0.351135	3.39412	2.58959	5.34474	0.166993	2.01542	1.01108	0.222049	0.522438
hsa-miR-3174	3.6521	3.46347	3.02187	0.561431	4.74033	2.75199	1.80669	1.73916	0.876714	-1.72528	-0.786834	0.222817	0.523656
hsa-miR-1299	2.31957	2.46641	0.791443	2.64675	1.31676	2.79785	3.49294	4.83572	1.62818	1.67517	0.744306	0.22308	0.523687
hsa-miR-539-5p	15.9903	24.6641	2.26641	18.5272	4.91589	19.9519	22.1621	18.749	39.0764	1.8819	0.912191	0.224679	0.526851
hsa-miR-141-5p	2.12216	1.67926	3.38162	2.56654	5.35481	1.78879	1.38513	0.212093	3.33986	-1.78658	-0.837203	0.225572	0.528354
hsa-miR-6793-3p	0.888347	1.83669	0.323772	0.0802044	0.438919	0.504531	1.02379	1.61191	2.63014	1.9835	0.988045	0.226298	0.529461
hsa-miR-1208	0.542879	0.83963	1.90666	0.72184	2.01903	0.550397	0.421561	1.31498	0.208741	-1.91481	-0.937199	0.227133	0.530822
hsa-miR-4514	2.02346	2.20403	2.4103	7.2184	2.80908	2.29332	2.40892	0.89079	2.08741	-1.72373	-0.785535	0.227885	0.531985
hsa-miR-4761-3p	1.82605	1.46935	0.971317	0.160409	0.175568	0.458664	1.08401	0.254511	0	-2.10113	-1.07116	0.228622	0.53252
hsa-miR-3686	1.13511	0.944583	1.15119	6.09554	0.965622	0.596264	1.14424	0.0424186	2.25441	-2.02608	-1.01869	0.228443	0.53252
hsa-miR-4662a-3p	4.34303	4.19815	1.90666	8.90269	2.54573	2.84372	1.92714	1.48465	4.09133	-1.68112	-0.749423	0.23037	0.533163
hsa-miR-3145-5p	1.43123	1.88917	1.40301	0.160409	5.53038	0.779729	1.32491	1.35739	12.9002	1.96791	0.976664	0.23128	0.533163
hsa-miR-1197	5.67555	5.92988	1.40301	17.7252	12.2897	3.62345	4.99851	2.62995	8.30791	-1.75313	-0.809932	0.231475	0.533163
hsa-miR-1321	10.0186	13.4865	1.18716	6.73717	3.95027	15.778	15.1762	5.55683	14.0692	1.78463	0.835629	0.230863	0.533163
hsa-miR-520f-3p	2.41828	5.35264	0.647544	1.04266	2.98465	2.38505	3.07137	11.1985	1.71168	1.84295	0.882016	0.229693	0.533163
hsa-miR-410-3p	160.248	202.98	10.5766	12.0307	50.2123	274.969	276.123	118.008	121.655	2.26643	1.18042	0.230154	0.533163
hsa-miR-5188	2.12216	1.41687	1.72678	0.72184	1.58011	2.15572	1.98736	2.9693	3.33986	1.68784	0.755176	0.229345	0.533163
hsa-miR-4530	3.45468	3.14861	1.61886	0.561431	1.58011	3.53171	3.85427	4.36911	2.92238	1.73976	0.798889	0.231905	0.533163
hsa-miR-7154-3p	2.66504	3.30604	4.92853	15.2388	5.88152	8.02662	3.97472	1.31498	1.2942	-1.74973	-0.807135	0.231954	0.533163
hsa-miR-4474-5p	1.03641	0.892106	0.395722	0	1.22897	0.917328	0.903345	2.84204	0.960211	1.97363	0.980849	0.231308	0.533163
hsa-let-7e-3p	222.877	254.145	400.722	916.977	1589.94	373.857	415.479	251.881	274.203	-2.05835	-1.04149	0.230414	0.533163
hsa-miR-3679-3p	4.73785	2.99118	6.40349	3.93002	7.81276	3.16478	3.9145	14.3375	13.9022	1.7087	0.772897	0.23136	0.533163
hsa-miR-6877-5p	6.51455	5.71998	2.05056	0.72184	3.7747	7.43036	4.99851	5.72651	7.05546	1.67067	0.740425	0.23246	0.53374
hsa-miR-6072	1.43123	1.57431	1.47496	1.7645	0.526703	4.26558	2.64981	0.805953	1.46119	1.66962	0.739518	0.232922	0.534044
hsa-miR-4699-5p	3.60274	3.77833	5.36023	15.3993	3.248	24.8596	13.5502	1.27256	5.88651	1.81521	0.860135	0.233644	0.534044
hsa-miR-4470	1.52993	2.30898	0.971317	1.28327	0.351135	1.28426	1.08401	0.0848371	0.166993	-1.99682	-0.997702	0.233677	0.534044
hsa-miR-4703-3p	8.78477	7.13685	11.7997	4.97268	4.21362	6.10023	9.39479	9.54418	26.0509	1.72267	0.784649	0.23359	0.534044
hsa-miR-4804-5p	20.5307	12.9618	9.74914	14.8378	8.07611	19.5391	60.3435	11.7924	6.137	1.84538	0.883918	0.233868	0.534044
hsa-miR-892b	14.9045	11.1776	5.18035	5.05288	8.95395	11.4666	24.2699	13.5315	12.3992	1.69787	0.763729	0.234749	0.534891
hsa-miR-190b-3p	1.43123	1.04954	0.359747	2.24572	2.7213	0.687996	0.60223	0.721116	1.2107	-1.87538	-0.907184	0.234687	0.534891
hsa-miR-7109-3p	8.98218	10.233	8.20223	6.81738	11.1485	5.68744	3.43271	5.76893	7.63994	-1.59886	-0.677045	0.235696	0.535882
hsa-miR-636	5.08332	4.72292	15.3252	2.80716	10.4463	7.24689	7.94944	21.5486	16.7411	1.73831	0.797682	0.235619	0.535882
hsa-miR-3908	2.91181	2.62384	0.971317	1.7645	2.89687	3.25652	4.03494	1.78158	5.76127	1.66797	0.738094	0.236224	0.536501
hsa-miR-1915-3p	3.7508	4.82787	9.20952	2.16552	3.95027	4.17384	8.25055	6.99906	12.6497	1.66258	0.733426	0.23749	0.538792
hsa-miR-6878-3p	30.8454	36.6813	15.4331	7.77983	6.40822	35.8675	26.6788	35.5043	46.7581	1.86011	0.895392	0.238166	0.539739
hsa-miR-5092	0.74029	0.524768	0.143899	0.0802044	0.438919	0.275199	0.481784	0.212093	2.21266	2.03203	1.02292	0.238991	0.539856
hsa-miR-4292	18.8527	17.9996	149.691	401.503	99.5468	17.7962	19.5123	58.4528	156.765	-2.17794	-1.12297	0.238938	0.539856
hsa-miR-1203	13.8681	15.4807	6.29557	6.49656	5.35481	10.0447	6.86543	0.424186	4.17483	-1.76929	-0.823169	0.238691	0.539856
hsa-miR-4733-5p	0.789642	0.682199	1.29509	3.529	0.790054	0.229332	0.782899	1.73916	0.0834966	-1.98419	-0.988554	0.241106	0.542902
hsa-miR-215-3p	5.92232	8.92106	1.04327	5.3737	2.10681	6.74236	1.74647	1.44223	0.375735	-1.81381	-0.859024	0.240832	0.542902
hsa-miR-5687	0.641584	1.25944	1.51094	3.28838	1.75568	2.33919	0.722676	0.254511	0.0834966	-1.97939	-0.985059	0.241117	0.542902
hsa-miR-197-5p	1.28317	1.10201	1.65484	2.16552	0.70227	2.15572	1.08401	3.09656	2.71364	1.63905	0.712864	0.242477	0.544376
hsa-miR-11399	18.5566	22.4601	39.2124	34.8889	98.4934	122.876	61.6082	89.7153	67.4235	2.00069	1.0005	0.242433	0.544376
hsa-miR-10395-5p	2.86245	3.83081	7.44676	2.64675	3.07243	3.57758	2.89071	0.721116	2.25441	-1.69918	-0.764836	0.242552	0.544376
hsa-miR-12124	1.33252	1.31192	1.18716	0.481227	1.22897	1.10079	1.08401	2.24818	2.92238	1.64238	0.715785	0.243397	0.545689
hsa-miR-6741-5p	55.4724	108.942	68.4958	125.199	176.094	258.824	177.477	192.495	270.612	2.10581	1.07438	0.243745	0.545884
hsa-miR-4654	4.09627	2.99118	16.7642	3.6894	3.95027	4.81597	7.64832	26.2995	6.0535	1.77179	0.82521	0.244249	0.546428
hsa-miR-6736-3p	1.13511	1.62678	3.84929	3.6894	6.67157	0.871462	0.963568	0.89079	4.8428	-1.7793	-0.831309	0.245018	0.546981
hsa-miR-4283	2.96116	2.67632	2.08653	2.08532	2.1946	3.48585	3.73383	5.30232	2.92238	1.59686	0.675239	0.244826	0.546981
hsa-miR-4257	1.23382	1.52183	5.10841	4.09043	3.59914	9.81541	6.0223	3.56316	1.75343	1.69738	0.763306	0.245859	0.548274
hsa-miR-3173-5p	3.05986	3.09613	5.18035	7.2184	6.32043	2.84372	4.27584	3.94493	0.166993	-1.77141	-0.8249	0.246285	0.54864
hsa-miR-4457	1.48058	1.52183	0.143899	4.65186	1.75568	2.01812	1.20446	0.424186	0.208741	-1.97098	-0.978913	0.246785	0.54917
hsa-miR-28-5p	141	189.599	59.6101	192.972	170.827	280.427	458.177	239.071	261.971	2.05542	1.03944	0.247382	0.549391
hsa-miR-2682-5p	7.20548	6.40218	3.09382	4.09043	7.90054	4.17384	4.57695	3.30865	2.46315	-1.57925	-0.65924	0.24741	0.549391
hsa-miR-4762-5p	13.2759	14.5886	23.0957	170.274	176.27	24.8137	28.5457	36.7769	63.4992	-2.069	-1.04893	0.248115	0.550373
hsa-miR-1909-5p	2.02346	2.51889	2.77005	1.36348	4.65254	3.07305	0.963568	1.52707	0.667973	-1.70012	-0.765635	0.24891	0.551553
hsa-miR-1537-5p	0.74029	0.419815	1.58289	2.56654	0.790054	0.366931	0.301115	1.01805	0.918463	-1.83521	-0.875942	0.249208	0.551631
hsa-miR-20a-3p	0.690937	0.524768	4.06514	9.0631	5.00368	1.92639	1.92714	0.0424186	4.00784	-1.9523	-0.965172	0.249799	0.552353
hsa-miR-4529-3p	5.6262	8.29134	10.5046	0.401022	9.30508	2.93545	4.6974	4.32669	3.88259	-1.72666	-0.787983	0.250536	0.5534
hsa-miR-204-3p	4.14562	4.35558	46.4433	255.451	18.259	2.47679	2.04758	35.0377	72.5168	-2.34523	-1.22973	0.250803	0.553404
hsa-miR-5692a	1.77669	1.67926	1.15119	2.40613	2.10681	1.05493	1.62602	0.169674	1.41944	-1.70563	-0.770304	0.251518	0.554398
hsa-miR-7108-3p	2.46763	2.36146	5.28828	4.97268	2.7213	3.80691	1.98736	2.20577	15.5721	1.65331	0.725354	0.252022	0.554661
hsa-miR-4731-5p	5.23138	6.08731	2.91395	4.01022	12.2019	11.0079	9.69591	6.87181	11.6895	1.62331	0.698936	0.252167	0.554661
hsa-miR-4798-5p	0.690937	0.367338	1.47496	0	0.351135	1.00906	0.240892	0.0848371	3.67385	2.11512	1.08074	0.252863	0.555263
hsa-miR-6770-3p	5.87296	5.35264	13.6344	8.90269	7.0227	11.1455	17.4647	12.9801	12.1488	1.63768	0.711652	0.252971	0.555263
hsa-miR-548ae-3p	1.77669	1.94164	0.899367	0.641636	1.05341	0.963195	1.38513	2.67237	3.6321	1.69762	0.763513	0.254023	0.556827
hsa-miR-4671-3p	1.08576	2.15155	1.61886	4.09043	0.526703	1.55946	1.74647	0.551441	0.584476	-1.71325	-0.77674	0.254215	0.556827
hsa-miR-1304-3p	22.6035	25.1364	6.72727	8.66208	4.91589	21.6948	25.8959	25.1542	22.0848	1.73827	0.797655	0.254859	0.557654
hsa-miR-1470	4.14562	5.19521	19.0666	17.8054	24.3161	10.1823	5.17918	8.73822	9.43512	-1.67878	-0.747413	0.255636	0.55877
hsa-miR-6510-3p	4.24433	5.6675	0.791443	0.962453	4.91589	2.38505	1.5658	2.24818	1.66993	-1.68085	-0.749193	0.256595	0.560282
hsa-miR-4693-5p	3.25727	2.20403	0.575595	0.401022	0.438919	1.78879	0.722676	2.92688	4.38357	1.76585	0.820362	0.257044	0.560677
hsa-miR-1304-5p	4.34303	4.09319	6.1157	7.2184	6.84714	10.2282	7.46766	15.5676	3.59035	1.61423	0.690844	0.257312	0.560679
hsa-miR-4999-5p	0.9377	1.99412	0.431696	3.20818	2.37016	1.28426	1.02379	1.31498	0.208741	-1.84319	-0.882205	0.2578	0.561158
hsa-miR-4534	1.62864	1.57431	1.15119	4.17063	1.14119	1.42186	1.50558	1.35739	0.292238	-1.68171	-0.74993	0.258169	0.561377
hsa-miR-4796-3p	12.6836	17.4223	2.05056	17.4044	14.3965	10.5951	8.55167	7.38083	3.84084	-1.68294	-0.750986	0.258872	0.561495
hsa-miR-4649-3p	4.93526	4.46053	35.7229	5.4539	3.51135	3.53171	2.40892	62.8643	17.409	1.98933	0.99228	0.258788	0.561495
hsa-miR-196a-3p	1.23382	1.46935	1.94263	7.1382	5.17924	1.23839	2.22825	0.975627	3.46511	-1.69999	-0.765527	0.259564	0.561495
hsa-miR-4777-3p	2.12216	2.0466	1.79873	0.160409	0.351135	1.69706	1.50558	1.52707	4.25833	1.6973	0.763241	0.259516	0.561495
hsa-miR-3127-5p	3.25727	2.83375	0.323772	4.73206	5.26703	4.08211	2.46914	0.254511	0.125245	-1.89142	-0.91947	0.25954	0.561495
hsa-miR-3691-5p	2.51698	2.62384	2.77005	6.73717	1.93124	2.29332	1.68624	3.47832	0.25049	-1.71499	-0.778204	0.26156	0.565229
hsa-miR-224-3p	3.05986	3.46347	1.54691	2.72695	6.58379	3.02718	2.64981	2.2906	0.333986	-1.66871	-0.73873	0.263894	0.568795
hsa-miR-3680-5p	1.08576	0.99706	0.755468	0.401022	0.0877838	0.412798	0.361338	1.61191	2.79714	1.89862	0.924951	0.264784	0.568795
hsa-miR-95-5p	1.92475	2.09907	2.12251	6.41636	1.22897	1.69706	1.68624	1.35739	1.92042	-1.64213	-0.715568	0.26484	0.568795
hsa-miR-4421	94.5103	108.102	366.762	937.349	942.535	394.635	219.152	1539.33	1772.26	2.00341	1.00246	0.26448	0.568795
hsa-miR-664b-5p	1.92475	1.41687	0.107924	0.320818	0.70227	0.963195	0.60223	0.0424186	0.208741	-1.98595	-0.989829	0.264379	0.568795
hsa-miR-4477b	2.46763	2.41393	3.48954	7.61942	0.351135	3.39412	1.92714	0.678697	1.71168	-1.69516	-0.761421	0.264596	0.568795
hsa-miR-4787-5p	2.22087	1.62678	6.18765	7.2184	0.438919	3.76105	2.3487	1.01805	1.00196	-1.74559	-0.803714	0.265817	0.570309
hsa-miR-5003-3p	1.33252	1.41687	3.74137	1.92491	2.7213	1.10079	0.481784	1.73916	2.12916	-1.62168	-0.697486	0.26773	0.573801
hsa-miR-12130	6.02102	5.30016	2.77005	4.33104	5.9693	6.60477	4.39628	9.41692	9.51861	1.54598	0.628521	0.268524	0.573801
hsa-miR-6881-3p	1.77669	1.78421	3.2737	9.22351	2.54573	2.06399	1.98736	2.75721	2.08741	-1.6587	-0.730054	0.267998	0.573801
hsa-miR-4303	69.1924	44.133	1.00729	4.73206	3.07243	200.987	39.3256	1.99367	1.2942	2.492	1.31731	0.268541	0.573801
hsa-miR-627-5p	1.92475	2.57137	4.20904	1.20307	2.45795	2.56852	1.38513	3.47832	9.35162	1.6864	0.753946	0.269739	0.575773
hsa-miR-5588-3p	3.84951	4.67044	2.23043	0	0.175568	7.61383	4.57695	1.1453	3.33986	1.89261	0.920377	0.270935	0.576562
hsa-miR-4485-5p	9.2783	8.13391	22.4122	10.0256	12.992	26.6484	17.9465	30.711	10.3953	1.70117	0.766528	0.270744	0.576562
hsa-miR-106a-3p	5.97167	6.3497	2.80603	5.05288	2.01903	15.3653	8.371	2.84204	2.83888	1.65094	0.723292	0.27052	0.576562
hsa-miR-3682-5p	1.13511	1.10201	2.19446	1.7645	2.45795	0.64213	0.903345	2.2906	0.166993	-1.7193	-0.781822	0.271765	0.577742
hsa-miR-5692b	0.690937	0.524768	1.47496	0	0	0.366931	0.481784	0.127256	0.125245	-2.04287	-1.03059	0.273443	0.579801
hsa-miR-4705	1.13511	0.629722	0.791443	4.81227	4.65254	1.60532	1.62602	0.721116	1.66993	-1.68779	-0.755137	0.273564	0.579801
hsa-miR-766-3p	16.6812	19.9937	4.20904	7.45901	15.45	4.12798	3.79405	10.1805	12.5245	-1.66352	-0.734239	0.273151	0.579801
hsa-miR-656-3p	13.4239	19.7838	0.899367	1.20307	2.1946	9.21915	23.1256	9.71385	12.5245	1.8151	0.860047	0.27479	0.581811
hsa-miR-4706	1.23382	1.73174	0.683519	1.68429	0.175568	1.14666	0.722676	3.39349	2.12916	1.67125	0.740928	0.275565	0.582863
hsa-miR-3664-5p	5.82361	5.92988	10.7924	22.4572	19.488	4.58664	4.81784	8.65339	13.8604	-1.61047	-0.687481	0.277709	0.583303
hsa-miR-338-3p	3.50404	3.77833	9.06562	6.41636	6.05708	6.37543	4.75762	1.56949	2.04567	-1.56851	-0.64939	0.278121	0.583303
hsa-miR-767-3p	1.52993	1.67926	0.431696	5.85492	1.58011	6.8341	5.66096	0.975627	1.75343	1.72505	0.786637	0.278509	0.583303
hsa-miR-6790-3p	7.89642	9.49831	3.70539	8.82249	4.30141	10.8245	11.2015	15.2283	5.80301	1.57202	0.652616	0.277953	0.583303
hsa-miR-2467-5p	3.40533	4.88035	1.58289	4.81227	10.2707	17.6127	9.39479	1.23014	5.42728	1.69074	0.757657	0.276335	0.583303
hsa-miR-1-3p	8.04448	3.83081	12.807	5.93513	14.8355	3.21065	2.52937	10.0108	6.84672	-1.60507	-0.682636	0.2761	0.583303
hsa-miR-3136-3p	2.12216	1.20697	2.94992	0.0802044	2.1946	0.64213	1.50558	2.71479	7.4312	1.78472	0.835697	0.277554	0.583303
hsa-miR-10398-5p	1.13511	1.41687	2.77005	22.2968	1.22897	1.83466	2.77026	3.22381	4.80105	-1.82143	-0.865074	0.277159	0.583303
hsa-miR-4271	2.36893	3.30604	10.2528	22.7781	1.05341	2.33919	2.64981	8.52613	4.67581	-1.74586	-0.803935	0.277193	0.583303
hsa-miR-569	0.493526	0.524768	0.971317	0	0.0877838	0.321065	0.481784	0	0	-2.15958	-1.11075	0.278559	0.583303
hsa-miR-548a-3p	2.31957	2.15155	0.287797	0.481227	2.80908	0.825596	1.38513	1.61191	7.59819	1.7769	0.829363	0.27898	0.5836
hsa-miR-874-5p	2.31957	3.46347	1.07924	4.57165	0.0877838	2.75199	2.40892	3.81767	7.30595	1.76507	0.819723	0.279552	0.584213
hsa-miR-517-5p	2.76375	2.7288	4.71268	0.320818	4.56476	2.24745	4.81784	6.82939	5.21854	1.57601	0.656273	0.280385	0.585371
hsa-miR-2116-3p	2.46763	2.46641	3.63344	2.32593	10.4463	2.15572	1.50558	3.52074	2.92238	-1.67093	-0.740648	0.281198	0.585899
hsa-miR-593-5p	0.838995	1.10201	0.971317	2.16552	2.28238	0.917328	0.843122	1.23014	0.292238	-1.74442	-0.802746	0.281154	0.585899
hsa-miR-4520-5p	2.12216	1.3644	1.79873	2.00511	1.22897	1.78879	1.5658	0.636279	0.25049	-1.63166	-0.706337	0.282103	0.587201
hsa-miR-499a-3p	3.6521	3.72586	1.69081	1.92491	0.438919	6.4213	7.16654	1.99367	0.292238	1.72189	0.783993	0.283473	0.588881
hsa-miR-6795-3p	2.46763	1.15449	7.73456	11.4692	25.3695	1.28426	2.04758	6.74455	11.8148	-1.75651	-0.812712	0.283426	0.588881
hsa-miR-3689d	3.45468	3.51595	2.44628	3.36859	2.10681	5.5957	3.07137	4.87814	4.34182	1.50395	0.588758	0.284326	0.58985
hsa-miR-6885-3p	4.19497	3.77833	6.00777	4.65186	6.05708	4.03625	2.89071	3.30865	2.83888	-1.50404	-0.588847	0.284502	0.58985
hsa-miR-4724-5p	2.02346	1.31192	4.38891	0.240613	5.26703	0.412798	1.08401	3.648	0.834966	-1.76674	-0.821088	0.286195	0.592772
hsa-miR-4317	4.6885	3.88329	3.02187	11.1484	2.01903	4.35731	2.83048	2.20577	3.29812	-1.55432	-0.636285	0.287345	0.594566
hsa-miR-218-1-3p	36.0768	38.0982	49.717	32.563	45.6476	69.029	63.9569	90.6909	75.5227	1.84924	0.886929	0.287961	0.595253
hsa-miR-1245b-5p	5.5275	4.61796	6.97909	17.0033	7.90054	3.30238	3.1316	7.93227	6.93022	-1.56973	-0.65052	0.288517	0.595813
hsa-miR-4329	7.05743	7.55667	11.7637	12.1109	17.469	5.77917	4.63717	35.674	28.9733	1.67875	0.747383	0.29034	0.598988
hsa-miR-1305	2.31957	2.78127	3.09382	0.0802044	3.42357	1.88052	3.73383	6.19311	3.7991	1.65924	0.730525	0.290872	0.599494
hsa-miR-99a-3p	146.676	175.64	294.885	528.307	582.533	155.533	161.036	168.062	227.528	-1.94085	-0.956692	0.292637	0.600247
hsa-miR-6732-5p	3.20792	3.56843	0.107924	0.0802044	0.877838	1.92639	0.782899	0.339349	0.166993	-1.9577	-0.969158	0.292001	0.600247
hsa-miR-4712-3p	38.5938	49.0134	215.488	591.107	151.427	53.6637	50.2862	523.403	1144.91	2.11869	1.08317	0.292671	0.600247
hsa-miR-1307-3p	257.818	323.1	9.64122	17.8054	7.81276	307.489	317.857	227.703	216.632	2.16973	1.11751	0.292506	0.600247
hsa-miR-3942-3p	7.05743	7.34676	1.65484	2.08532	0.526703	11.2831	6.86543	3.73283	3.04763	1.65976	0.730976	0.291858	0.600247
hsa-miR-371b-5p	5.08332	7.08437	0.251823	0.320818	0.526703	1.74292	6.32342	4.53879	6.26224	1.76789	0.82203	0.295174	0.604199
hsa-miR-4766-5p	5.5275	4.77539	0.863392	5.13308	4.38919	3.34825	2.58959	1.69674	2.83888	-1.57311	-0.653615	0.295088	0.604199
hsa-miR-376a-2-5p	1.48058	0.944583	1.94263	1.12286	0.351135	1.37599	1.20446	0.0424186	5.88651	1.80146	0.84917	0.296013	0.605324
hsa-miR-938	1.28317	1.57431	0.935342	2.32593	0.0877838	0.458664	0.421561	1.69674	0.0417483	-1.88935	-0.917891	0.29648	0.605687
hsa-miR-495-3p	31.5363	54.8908	1.22314	0.240613	1.66789	27.8409	37.6394	25.8753	51.2252	1.98867	0.991803	0.297607	0.606215
hsa-miR-4255	13.4733	4.40805	4.17306	0.160409	1.14119	5.96264	5.84163	14.592	6.01175	1.7274	0.788601	0.297344	0.606215
hsa-miR-4489	6.51455	3.25356	1.33106	5.53411	2.01903	4.99944	8.67212	6.19311	3.00588	1.53007	0.613596	0.297411	0.606215
hsa-miR-6827-5p	5.28073	5.03778	2.15848	4.25084	5.4426	4.95357	2.22825	6.36279	14.4032	1.58154	0.661327	0.298414	0.606679
hsa-miR-6866-5p	5.13267	6.87447	0.971317	0.641636	0.877838	1.74292	2.58959	2.07851	0.0834966	-1.79437	-0.843477	0.2984	0.606679
hsa-miR-4790-5p	3.10922	2.83375	1.40301	4.97268	9.12952	1.55946	4.75762	3.35107	0.417483	-1.69688	-0.762887	0.299803	0.608911
hsa-miR-2278	2.27022	1.94164	1.72678	4.09043	2.80908	1.83466	0.903345	2.2906	1.41944	-1.54351	-0.626213	0.300547	0.609831
hsa-miR-1277-3p	16.2864	19.259	2.5542	1.68429	0.877838	1.83466	2.40892	7.42325	6.97197	-1.74623	-0.804243	0.30204	0.610198
hsa-miR-10401-3p	2.86245	3.25356	1.04327	1.36348	0.438919	3.07305	2.64981	4.02976	2.00392	1.61654	0.692911	0.30202	0.610198
hsa-miR-12119	5.13267	5.14273	2.48225	14.4368	14.0454	7.56796	7.64832	1.95125	3.42336	-1.59806	-0.676321	0.301309	0.610198
hsa-miR-6894-3p	2.61569	3.25356	4.13709	8.82249	7.11049	3.11892	2.46914	4.66604	3.25637	-1.51614	-0.600404	0.301327	0.610198
hsa-miR-1303	1.82605	1.83669	1.15119	0	0.263351	1.42186	2.77026	0.169674	2.96413	1.77079	0.82439	0.302185	0.610198
hsa-miR-3162-3p	5.03397	4.04072	6.40349	0.160409	2.01903	0.917328	0.782899	4.53879	2.12916	-1.69207	-0.758786	0.30289	0.611033
hsa-miR-3180-5p	2.76375	1.57431	3.09382	3.84981	1.31676	1.92639	2.46914	0.29693	1.62818	-1.60745	-0.684772	0.303204	0.611077
hsa-miR-3610	4.14562	2.15155	1.43899	5.21329	6.93492	2.10986	1.80669	2.54511	3.54861	-1.56595	-0.647039	0.303528	0.611143
hsa-miR-6732-3p	1.92475	2.2565	2.26641	1.8447	4.82811	0.917328	1.44535	2.88446	1.37769	-1.55975	-0.641314	0.30574	0.612003
hsa-miR-4506	2.31957	2.20403	2.51823	2.88736	4.65254	1.46773	2.16803	2.46028	1.46119	-1.51181	-0.596274	0.304647	0.612003
hsa-miR-3141	0.838995	1.20697	5.79192	18.1262	10.1829	1.46773	0.662453	3.22381	11.105	-1.75163	-0.808701	0.306296	0.612003
hsa-miR-6805-5p	0.493526	0.944583	6.83519	3.6894	0.965622	1.42186	1.68624	0.975627	2.12916	-1.67383	-0.743156	0.306866	0.612003
hsa-miR-3973	1.57928	2.0466	0.395722	0.0802044	2.54573	1.28426	1.32491	0.0848371	0.0834966	-1.92056	-0.941525	0.306539	0.612003
hsa-miR-4310	1.8754	1.04954	1.25911	1.52388	0.263351	0.733863	1.38513	0.254511	0.459231	-1.7413	-0.800166	0.305484	0.612003
hsa-miR-3155a	360.176	440.228	585.056	1270.6	1277.52	497.651	702.441	296.888	274.036	-1.77682	-0.8293	0.306878	0.612003
hsa-miR-6872-3p	1.18446	1.57431	2.01458	2.56654	5.9693	1.55946	1.38513	1.31498	2.5049	-1.54327	-0.625995	0.306837	0.612003
hsa-miR-5191	3.05986	3.72586	1.07924	2.48634	0.965622	10.641	3.85427	0.59386	0.459231	1.71039	0.774321	0.304974	0.612003
hsa-miR-1275	6.86002	8.08143	3.02187	2.08532	1.31676	10.1365	7.10632	7.25358	2.71364	1.58139	0.661194	0.305545	0.612003
hsa-miR-8080	1.48058	1.46935	3.2737	1.60409	2.54573	1.00906	0.963568	1.90884	1.37769	-1.57613	-0.656382	0.307554	0.612768
hsa-miR-1246	4.78721	6.19227	10.2888	17.4044	6.14487	7.52209	6.56431	3.30865	5.97001	-1.53291	-0.616269	0.308065	0.613058
hsa-miR-6841-3p	0.394821	0.577245	0.0719494	2.16552	0.438919	0.275199	0.963568	0.169674	0.125245	-1.89949	-0.925614	0.308578	0.613058
hsa-miR-8055	1.28317	1.15449	1.79873	1.60409	2.7213	1.33013	0.903345	1.824	0.125245	-1.62457	-0.700056	0.308437	0.613058
hsa-miR-6132	4.39238	4.40805	16.7282	58.9503	9.65622	4.03625	3.43271	10.138	25.55	-1.74301	-0.801583	0.308889	0.613093
hsa-miR-125a-3p	13.3252	20.6759	23.2756	57.5066	34.938	17.8879	18.8498	22.9909	17.3255	-1.55168	-0.633835	0.30977	0.613267
hsa-miR-29a-5p	9.57441	10.6528	28.1682	48.6841	34.3235	7.47623	10.8401	19.7246	24.1723	-1.68743	-0.754828	0.310042	0.613267
hsa-miR-6508-3p	12.2888	11.8598	7.19494	13.1535	8.07611	8.85222	7.34721	2.9693	8.43316	-1.52383	-0.607703	0.309696	0.613267
hsa-miR-4649-5p	2.46763	2.0466	18.0233	2.48634	2.63351	3.07305	2.46914	27.9963	5.17679	1.74367	0.80213	0.310148	0.613267
hsa-miR-4652-3p	2.41828	1.25944	6.18765	1.44368	7.63719	1.23839	1.02379	3.60558	3.17287	-1.66913	-0.739096	0.311207	0.614781
hsa-miR-103b	1.52993	2.30898	7.80651	0.481227	0.526703	0.917328	1.74647	1.99367	1.37769	-1.69701	-0.762995	0.311874	0.614938
hsa-miR-4740-5p	1.33252	1.10201	5.8279	0.561431	3.42357	0.504531	1.20446	2.2906	1.92042	-1.65997	-0.731155	0.311716	0.614938
hsa-miR-503-5p	31.7831	42.1389	19.93	53.8172	38.3615	83.3393	95.9955	53.108	41.9153	1.84475	0.883424	0.31509	0.620694
hsa-miR-1266-5p	4.78721	6.82199	5.18035	3.04777	4.38919	15.5946	11.2015	4.07218	0.709721	1.62408	0.699626	0.315398	0.620718
hsa-miR-3657	1.03641	1.52183	7.98638	3.28838	3.86249	13.9434	4.33606	1.1453	3.46511	1.61161	0.688503	0.31617	0.621652
hsa-miR-4775	25.5153	33.4278	1.00729	3.12797	1.93124	6.2837	10.4788	26.0874	53.5213	1.85141	0.888628	0.317545	0.623771
hsa-miR-6807-5p	6.16908	6.66456	10.9363	6.25595	7.98833	3.53171	8.06989	5.98102	2.54665	-1.52118	-0.60519	0.317979	0.624038
hsa-miR-1539	1.43123	1.10201	0.683519	1.7645	0.438919	1.33013	0.843122	0.127256	0.25049	-1.7129	-0.776439	0.319139	0.625728
hsa-miR-4672	0.641584	0.419815	1.43899	1.68429	4.21362	0.275199	0.421561	2.84204	0.0834966	-1.83342	-0.874541	0.32005	0.626928
hsa-miR-615-3p	28.131	29.9118	7.12299	9.62453	7.98833	9.12742	6.20297	8.86548	17.409	-1.59218	-0.671004	0.321035	0.627188
hsa-miR-4522	13.6213	7.924	305.893	7.94024	16.4156	21.649	19.0305	495.491	75.2304	2.17191	1.11897	0.321079	0.627188
hsa-miR-6084	2.07281	1.67926	0.647544	0.0802044	2.1946	0.733863	0.361338	0.933208	1.00196	-1.74569	-0.803798	0.321082	0.627188
hsa-miR-3934-3p	1.43123	2.57137	5.75595	6.09554	0.526703	2.29332	4.03494	6.57488	8.18267	1.60387	0.681558	0.321608	0.62763
hsa-miR-4311	5.23138	6.19227	1.58289	7.45901	2.28238	2.38505	3.25204	2.79963	3.25637	-1.55313	-0.635176	0.322833	0.628265
hsa-miR-124-3p	1.48058	1.62678	1.61886	3.12797	2.80908	1.19253	1.44535	2.46028	0.25049	-1.58009	-0.66001	0.322754	0.628265
hsa-miR-2115-5p	0.9377	1.10201	4.96451	8.50167	5.79373	0.687996	1.80669	6.27795	1.16895	-1.70684	-0.771328	0.322819	0.628265
hsa-miR-4527	5.72491	5.98236	2.91395	1.7645	3.95027	4.54078	1.98736	1.56949	2.4214	-1.551	-0.633201	0.325938	0.6336
hsa-miR-4633-5p	1.77669	1.31192	2.01458	2.24572	1.84346	1.37599	1.20446	4.92055	3.67385	1.52891	0.612501	0.32618	0.6336
hsa-miR-548ad-3p	1.23382	0.944583	1.29509	3.20818	0.790054	0.917328	1.74647	0.29693	0.667973	-1.65816	-0.729583	0.326669	0.633962
hsa-miR-10396a-5p	31.1415	38.8853	119.76	284.325	177.674	44.1235	50.6476	71.2208	121.488	-1.81334	-0.858646	0.32767	0.635316
hsa-miR-2355-5p	5.5275	6.71704	3.99319	8.9829	10.7096	3.76105	4.4565	4.19944	6.76322	-1.48163	-0.567183	0.328141	0.63564
hsa-miR-639	5.47814	8.65868	8.8138	9.22351	13.8698	11.1455	11.2617	15.4404	16.9916	1.5001	0.585056	0.328577	0.635896
hsa-miR-5580-3p	3.01051	2.99118	10.5406	14.6774	10.6218	6.51303	5.96208	2.37544	6.84672	-1.53973	-0.622675	0.329595	0.637277
hsa-miR-24-1-5p	1.82605	2.15155	5.21633	15.6399	9.48065	0.871462	1.74647	4.7933	9.72735	-1.59567	-0.67416	0.330084	0.637635
hsa-miR-3169	2.22087	2.57137	2.12251	5.05288	1.22897	2.33919	1.50558	1.1453	1.83693	-1.53589	-0.619073	0.33107	0.638362
hsa-miR-875-5p	0.493526	0.577245	0.143899	3.12797	0.351135	0.871462	0.722676	0.212093	0.25049	-1.80309	-0.850473	0.331014	0.638362
hsa-miR-3184-3p	0.888347	1.25944	0.791443	1.28327	6.496	1.14666	2.04758	1.27256	0.793218	-1.6111	-0.688048	0.331488	0.63858
hsa-miR-6828-3p	2.41828	1.73174	3.59747	0.401022	7.19827	1.78879	1.20446	4.02976	0.292238	-1.67265	-0.742133	0.331863	0.638713
hsa-miR-515-5p	6.86002	5.71998	16.9081	12.2713	7.37384	6.05437	5.78141	27.1479	22.0431	1.55156	0.633717	0.332213	0.6388
hsa-miR-766-5p	3.05986	3.46347	2.44628	6.41636	0.614487	2.15572	3.55316	0.975627	1.62818	-1.5464	-0.628912	0.332844	0.639427
hsa-miR-545-3p	0.690937	0.734676	0.575595	2.80716	0.614487	0.504531	0.662453	0.254511	1.1272	-1.66577	-0.736185	0.333286	0.639689
hsa-miR-2114-3p	7.94577	7.87153	9.64122	18.447	16.7667	5.5957	9.69591	9.11999	7.84868	-1.49732	-0.582379	0.334446	0.640741
hsa-miR-5572	2.41828	3.30604	6.22362	6.89758	8.77838	9.58608	8.79256	3.98735	10.7711	1.50625	0.590957	0.334412	0.640741
hsa-miR-582-3p	3.60274	3.51595	1.61886	0.641636	2.80908	1.92639	1.5658	1.48465	1.37769	-1.54333	-0.626044	0.335064	0.641167
hsa-miR-519a-2-5p	0.444174	0.262384	0.647544	2.16552	1.93124	0.229332	0.301115	0	1.79518	-1.84355	-0.882486	0.335281	0.641167
hsa-miR-3924	1.8754	2.15155	1.79873	2.16552	0.526703	1.55946	2.16803	3.86009	3.00588	1.53392	0.617225	0.335927	0.641816
hsa-miR-375-5p	3.30663	3.30604	3.59747	9.54433	5.79373	3.30238	4.15539	3.4359	2.92238	-1.46458	-0.550484	0.336637	0.642001
hsa-miR-6788-3p	1.03641	0.577245	2.6981	0.320818	1.66789	0.64213	1.20446	0.381767	0.834966	-1.6824	-0.75052	0.336628	0.642001
hsa-miR-625-5p	178.36	243.073	1.07924	1.28327	0.70227	52.5629	56.7301	17.731	31.4365	-2.14322	-1.09978	0.337908	0.64384
hsa-miR-5582-5p	0.444174	0.682199	1.11522	0.0802044	1.31676	0.596264	1.74647	1.39981	1.2107	1.67258	0.742074	0.338259	0.643922
hsa-miR-222-5p	10.7589	10.128	10.2168	25.5852	26.3351	15.2735	15.8387	7.25358	5.0098	-1.52917	-0.612745	0.338834	0.644431
hsa-miR-7-5p	2715.09	2938.18	2009.87	18655.6	17647.9	2083.67	3058.79	9659.13	5608.55	-1.72332	-0.785187	0.339818	0.645716
hsa-miR-1184	3.25727	2.57137	4.74866	2.08532	1.58011	2.43092	2.28848	2.24818	0.793218	-1.49756	-0.582616	0.340417	0.646268
hsa-miR-4655-5p	1.8754	1.52183	5.64803	6.09554	4.03806	8.66875	5.29963	4.36911	4.17483	1.46947	0.555301	0.34366	0.650744
hsa-miR-345-3p	3.55339	2.83375	21.1531	17.5648	18.698	5.18291	3.61338	9.96836	13.1507	-1.59694	-0.675313	0.343228	0.650744
hsa-miR-4763-5p	2.66504	3.56843	6.97909	4.25084	9.39287	9.76955	4.93829	7.50809	9.89435	1.50168	0.586575	0.343707	0.650744
hsa-miR-4449	6.41584	7.7141	3.92124	8.26106	23.4383	22.7039	14.7546	9.03515	14.6537	1.54222	0.625012	0.345516	0.653578
hsa-miR-4755-3p	1.23382	1.41687	2.15848	13.715	2.63351	2.24745	2.83048	0.212093	4.80105	-1.67162	-0.741244	0.346676	0.65518
hsa-miR-6516-3p	4.19497	3.56843	9.13757	13.4743	7.0227	6.10023	7.94944	12.6832	17.6595	1.48747	0.572863	0.348578	0.658181
hsa-miR-5696	1.67799	2.09907	3.30967	2.88736	3.59914	1.00906	1.98736	1.95125	2.21266	-1.50353	-0.588356	0.349291	0.658932
hsa-miR-891a-5p	1.82605	1.20697	3.16577	1.20307	1.31676	0.504531	0.903345	1.27256	2.04567	-1.49296	-0.578178	0.349818	0.659333
hsa-miR-196a-1-3p	1.67799	3.04366	0.107924	0.160409	2.45795	1.00906	1.14424	1.1453	0.0834966	-1.76153	-0.816825	0.350139	0.659344
hsa-miR-4686	2.8131	3.56843	2.19446	4.33104	1.93124	1.28426	1.68624	1.1453	3.67385	-1.515	-0.599318	0.351346	0.661023
hsa-miR-513b-5p	1.38187	2.41393	1.18716	1.12286	0.263351	0.550397	2.40892	1.90884	3.25637	1.56729	0.648276	0.351679	0.661056
hsa-miR-4293	3.05986	2.83375	4.31696	4.89247	4.74033	2.98132	1.68624	2.41786	3.6321	-1.4522	-0.538238	0.354468	0.664506
hsa-miR-12125	2.31957	1.31192	6.83519	7.94024	5.79373	6.78823	3.97472	4.41153	14.0274	1.51186	0.596324	0.354091	0.664506
hsa-miR-6861-5p	4.49109	4.9853	1.72678	3.84981	0.351135	3.16478	2.77026	1.48465	0.417483	-1.58007	-0.65999	0.354784	0.664506
hsa-miR-153-3p	1.92475	3.6209	4.46086	5.77472	4.12584	1.42186	1.98736	5.72651	1.41944	-1.50108	-0.586004	0.354295	0.664506
hsa-miR-5683	1.67799	2.2565	0.107924	0.240613	1.66789	1.10079	1.32491	2.12093	3.00588	1.58543	0.664874	0.357056	0.667407
hsa-miR-9500	7.05743	10.128	15.3612	12.8327	7.72498	5.8709	5.78141	8.86548	8.80889	-1.44963	-0.53568	0.357258	0.667407
hsa-miR-676-5p	1.43123	0.577245	0.791443	0	6.496	1.33013	0.60223	1.90884	0.292238	-1.7837	-0.834875	0.357535	0.667407
hsa-miR-4653-3p	0.690937	0.682199	0.179873	0.240613	1.05341	0.550397	0.722676	2.41786	0.125245	1.6871	0.754549	0.357608	0.667407
hsa-miR-4426	5.97167	4.77539	0.863392	2.56654	7.28606	4.17384	3.55316	2.20577	1.25245	-1.5325	-0.615889	0.359341	0.669173
hsa-miR-125a-5p	2567.92	3654.7	12461.8	32531.9	27226.5	3315.36	4699.14	7570.99	21202.1	-1.70585	-0.770492	0.359513	0.669173
hsa-miR-3621	9.17959	7.60914	13.7783	0.641636	1.05341	4.35731	8.49145	17.0947	11.3138	1.59186	0.670713	0.359503	0.669173
hsa-miR-6823-5p	8.19254	11.4924	4.82061	3.04777	8.60281	10.4117	8.61189	13.8285	9.51861	1.4635	0.549425	0.360833	0.671034
hsa-miR-548av-5p	27.2427	26.5008	4.60476	8.10065	2.28238	19.2639	27.9435	24.73	17.2003	1.61858	0.69473	0.362018	0.67258
hsa-miR-3937	3.25727	2.67632	3.45357	0.320818	1.93124	3.16478	4.09517	1.39981	5.92826	1.54751	0.629947	0.362551	0.67258
hsa-miR-4278	0.789642	0.367338	0.395722	0	0.351135	0.321065	0.301115	0.169674	0.166993	-1.7181	-0.780817	0.362628	0.67258
hsa-miR-3195	10.4628	8.08143	6.61934	15.2388	3.16022	9.63195	8.79256	17.1371	16.1983	1.48593	0.571367	0.363245	0.673128
hsa-miR-1204	32.9182	34.2149	16.1167	35.8514	31.8655	79.8534	58.7777	28.7174	33.4404	1.66322	0.733983	0.365048	0.675871
hsa-miR-9851-5p	2.36893	2.88623	1.76276	2.24572	6.32043	1.10079	1.86691	0.89079	4.30007	-1.51329	-0.597693	0.366926	0.676531
hsa-miR-885-3p	15.1513	14.7985	26.8371	16.4419	22.2093	16.833	13.7309	15.0162	4.25833	-1.53328	-0.616622	0.365999	0.676531
hsa-miR-760	13.8681	18.7342	52.0554	119.424	42.3118	11.6501	18.0669	32.535	54.398	-1.68891	-0.756096	0.36702	0.676531
hsa-miR-4291	2.61569	2.09907	3.30967	2.80716	1.93124	2.43092	1.44535	2.24818	0.876714	-1.47075	-0.556549	0.366446	0.676531
hsa-miR-587	0.345468	0.577245	1.25911	0.240613	0.351135	1.37599	0.60223	0.254511	1.54469	1.62741	0.702577	0.366586	0.676531
hsa-miR-548as-3p	1.57928	1.10201	0.575595	1.12286	0.175568	0.779729	0.722676	0.805953	3.7156	1.63831	0.712204	0.368992	0.678972
hsa-miR-4477a	2.02346	0.892106	1.76276	0.0802044	1.84346	1.05493	1.08401	2.84204	3.33986	1.56351	0.644786	0.368969	0.678972
hsa-miR-1267	2.91181	2.36146	2.91395	3.44879	6.40822	2.20159	2.52937	1.61191	3.42336	-1.45464	-0.540666	0.369521	0.679348
hsa-miR-6796-3p	1.67799	1.52183	0.935342	1.44368	1.05341	0.687996	0.662453	1.73916	0.208741	-1.60137	-0.67931	0.370267	0.680123
hsa-miR-4260	4.5898	6.97942	1.11522	2.40613	2.54573	4.63251	4.93829	6.32037	5.09329	1.48273	0.568256	0.370909	0.680704
hsa-miR-532-5p	544.31	687.237	171.347	453.957	538.466	345.282	438.484	177.098	170.792	-1.69336	-0.759886	0.371744	0.68164
hsa-miR-649	2.66504	2.41393	1.58289	7.69963	5.4426	7.15516	4.63717	4.70846	6.51273	1.47111	0.556907	0.372377	0.682202
hsa-miR-205-3p	1.23382	1.46935	1.40301	2.64675	2.98465	0.779729	0.963568	1.99367	1.41944	-1.45711	-0.543111	0.373575	0.682346
hsa-miR-660-3p	6.86002	5.92988	8.59795	15.3993	16.9423	4.67838	5.35985	8.44129	10.5206	-1.47312	-0.558875	0.372803	0.682346
hsa-miR-3143	2.02346	3.04366	3.16577	2.96756	2.28238	2.01812	3.25204	1.78158	0.333986	-1.4758	-0.561493	0.373194	0.682346
hsa-miR-4325	3.50404	3.83081	69.9348	68.0936	166.789	13.0261	12.948	37.7525	73.978	-1.81292	-0.858314	0.373999	0.682346
hsa-miR-3978	36.2742	33.5852	7.73456	10.6672	18.8735	54.581	30.5331	36.7345	17.576	1.62576	0.701116	0.374085	0.682346
hsa-miR-4505	3.15857	3.83081	5.32425	4.33104	7.19827	3.43998	2.89071	3.26623	3.92434	-1.38983	-0.474909	0.376095	0.685415
hsa-miR-10397-5p	2.76375	2.7288	3.23772	4.73206	4.12584	5.36637	1.98736	2.79963	10.3953	1.46943	0.555253	0.377432	0.687254
hsa-miR-302b-5p	1.48058	1.25944	0.143899	0.0802044	5.26703	3.16478	0.542007	2.37544	4.75931	1.65627	0.72794	0.378269	0.688179
hsa-miR-320a-5p	1.92475	1.46935	1.07924	0.240613	2.1946	1.10079	1.14424	0.59386	0.709721	-1.56991	-0.650682	0.378959	0.688459
hsa-miR-6845-3p	7.79772	7.13685	6.40349	12.0307	9.39287	6.05437	4.57695	7.67776	5.26029	-1.43188	-0.517907	0.379178	0.688459
hsa-miR-597-5p	0.542879	0.524768	1.00729	2.64675	1.49232	2.56852	1.98736	1.44223	1.25245	1.49382	0.579002	0.379409	0.688459
hsa-miR-181c-3p	9.17959	9.49831	7.48273	18.046	3.68692	7.06343	8.19033	3.81767	7.63994	-1.43466	-0.520706	0.380662	0.688943
hsa-miR-6849-3p	3.30663	3.04366	4.49684	11.389	9.91957	3.11892	2.77026	4.66604	7.18071	-1.43836	-0.52443	0.380536	0.688943
hsa-miR-4285	2.91181	2.7288	10.9003	0.0802044	0.526703	2.06399	1.38513	3.30865	1.66993	-1.63612	-0.710279	0.380009	0.688943
hsa-miR-541-5p	11.4005	16.5302	27.5206	20.1313	24.8428	7.29276	8.371	17.2644	20.3732	-1.50514	-0.589898	0.382098	0.689753
hsa-miR-4304	2.02346	1.57431	0.53962	0.0802044	1.40454	0.733863	0.903345	0.933208	0.208741	-1.63195	-0.706599	0.381949	0.689753
hsa-miR-6738-3p	10.9563	9.13097	35.6149	19.4095	24.2283	7.43036	6.26319	29.0143	8.97588	-1.53692	-0.620042	0.381909	0.689753
hsa-miR-4687-5p	3.89886	3.72586	41.0471	3.6894	7.81276	6.2837	6.32342	9.07757	9.30987	-1.556	-0.637842	0.382568	0.690007
hsa-miR-3150a-5p	8.93283	7.2418	20.3617	8.10065	6.58379	14.9066	17.1636	19.6822	9.01763	1.47484	0.560555	0.383009	0.690207
hsa-miR-3617-5p	7.99513	9.9706	0.0719494	2.64675	0.790054	6.9717	8.79256	4.24186	7.76518	1.61216	0.688992	0.384497	0.690512
hsa-miR-3975	1.57928	1.52183	0.719494	0.160409	0.351135	0.733863	0.240892	1.01805	0.166993	-1.62383	-0.6994	0.384173	0.690512
hsa-miR-7154-5p	0.9377	1.04954	0.107924	3.04777	1.22897	0.733863	0.60223	1.18772	0.584476	-1.60499	-0.682563	0.383957	0.690512
hsa-miR-4782-5p	5.13267	3.6209	6.54739	5.4539	12.0264	5.5957	3.85427	3.81767	5.05154	-1.41951	-0.505392	0.384061	0.690512
hsa-miR-1262	4.39238	4.14567	2.08653	2.08532	4.74033	3.89865	3.25204	0.805953	1.46119	-1.48629	-0.571719	0.385313	0.691384
hsa-miR-643	3.55339	3.98824	10.0369	8.10065	17.3812	6.78823	2.22825	7.55051	37.3647	1.56756	0.648524	0.385941	0.691919
hsa-miR-4693-3p	2.41828	1.78421	2.15848	1.8447	1.05341	2.10986	1.38513	1.61191	5.88651	1.47355	0.559293	0.386784	0.692836
hsa-miR-638	4.83656	6.50713	9.42537	10.5068	10.1829	4.26558	4.33606	7.0839	7.22246	-1.43689	-0.522948	0.389096	0.696382
hsa-miR-4284	4.5898	5.35264	8.526	26.4675	12.0264	3.16478	11.2015	6.53246	9.68561	-1.48726	-0.572653	0.389594	0.696678
hsa-miR-4638-5p	3.7508	3.98824	2.66213	1.60409	4.47697	7.70556	5.05873	3.4359	2.46315	1.41188	0.497622	0.390123	0.697001
hsa-miR-3179	0.542879	1.15449	3.74137	0.160409	0.790054	1.51359	1.14424	0.29693	0.166993	-1.6683	-0.73838	0.39044	0.697001
hsa-miR-1290	4.78721	4.14567	6.22362	3.20818	10.8852	1.65119	1.62602	6.82939	6.01175	-1.44479	-0.530864	0.390924	0.697269
hsa-miR-4279	5.23138	5.6675	3.59747	4.25084	3.248	3.21065	5.84163	10.3925	5.51078	1.41397	0.499756	0.391989	0.698575
hsa-miR-4668-3p	1.62864	1.46935	6.18765	0.401022	1.84346	1.14666	1.02379	3.35107	8.97588	1.55954	0.641117	0.39616	0.698908
hsa-miR-7705	16.6318	15.848	8.13028	11.389	6.58379	26.3273	22.1019	10.0108	10.9798	1.47747	0.563127	0.39258	0.698908
hsa-miR-3675-5p	1.92475	3.30604	3.4176	3.76961	2.01903	2.70612	2.46914	1.1453	1.71168	-1.45386	-0.53989	0.395299	0.698908
hsa-miR-4645-5p	1.08576	0.577245	0.863392	0.160409	0.263351	1.74292	0.903345	1.06046	0.208741	1.58317	0.662816	0.394753	0.698908
hsa-miR-548q	10.3147	10.8102	7.98638	10.587	3.7747	5.22877	4.15539	8.69581	6.34574	-1.42464	-0.510597	0.395759	0.698908
hsa-miR-4424	0.592232	0.209907	0.719494	0	0.263351	0.412798	0.240892	0.0424186	1.87867	1.73687	0.796487	0.395764	0.698908
hsa-miR-3116	6.41584	6.19227	17.9873	33.6859	39.0638	7.15516	5.84163	17.0098	24.3393	-1.51871	-0.602843	0.396181	0.698908
hsa-miR-4479	4.83656	5.03778	1.36704	2.88736	11.1485	6.19197	4.39628	2.41786	0.876714	-1.45297	-0.539007	0.395225	0.698908
hsa-miR-202-5p	2.12216	1.73174	2.37433	4.09043	1.40454	1.46773	1.38513	1.06046	2.58839	-1.43021	-0.516229	0.395175	0.698908
hsa-miR-6511b-5p	2.07281	1.3644	0.791443	2.08532	0.263351	1.78879	0.782899	2.20577	3.13112	1.50081	0.585745	0.39449	0.698908
hsa-miR-5089-5p	6.21843	6.08731	35.3991	11.1484	3.16022	8.34769	7.52788	46.5756	16.5323	1.58936	0.668444	0.395209	0.698908
hsa-miR-4288	13.3746	14.3262	10.1808	9.78494	6.40822	36.2345	13.6104	5.9386	8.43316	1.48179	0.567342	0.395575	0.698908
hsa-miR-6750-3p	2.71439	3.67338	10.5406	4.89247	9.83179	2.84372	2.46914	26.1298	7.3477	1.53216	0.615566	0.398384	0.701022
hsa-miR-6070	21.3697	15.1133	49.9688	196.902	334.369	46.371	19.7532	96.5871	121.947	-1.73562	-0.79545	0.398127	0.701022
hsa-miR-6857-5p	4.09627	3.93576	10.6125	2.08532	2.1946	7.56796	4.93829	10.138	4.25833	1.45267	0.538705	0.398026	0.701022
hsa-miR-4795-5p	7.5016	4.46053	2.59018	4.41124	9.12952	3.07305	3.85427	4.02976	4.59231	-1.43393	-0.519971	0.399004	0.701524
hsa-miR-548at-3p	1.72734	2.15155	1.51094	1.8447	0.790054	1.28426	1.08401	0.636279	1.50294	-1.44737	-0.533435	0.400719	0.703947
hsa-miR-708-3p	1.92475	1.94164	0.719494	0.160409	4.30141	0.917328	1.26468	2.24818	0.166993	-1.56713	-0.648123	0.401462	0.704232
hsa-miR-30a-3p	318.028	435.925	636.5	1172.99	1787.28	523.473	748.512	513.689	365.59	-1.61786	-0.694088	0.401553	0.704232
hsa-miR-6499-5p	3.25727	2.30898	2.33835	6.17574	2.89687	2.24745	2.10781	2.92688	2.04567	-1.43131	-0.517333	0.402586	0.705452
hsa-miR-4690-3p	3.01051	4.51301	7.51871	1.92491	0.438919	3.66931	6.38364	5.17507	4.88455	1.42714	0.513131	0.403292	0.705509
hsa-miR-5691	7.25484	7.81905	23.7433	3.44879	7.81276	5.22877	7.40743	35.9285	11.6478	1.49966	0.584635	0.403141	0.705509
hsa-miR-12136	92.6842	191.54	4.85658	1.44368	11.4997	185.851	188.137	49.46	18.244	1.82765	0.869991	0.405982	0.705911
hsa-miR-100-3p	15.0526	15.9005	16.5124	14.918	30.1098	15.6405	28.1844	31.2625	30.7685	1.43418	0.520229	0.406849	0.705911
hsa-miR-562	6.90937	5.09025	2.87797	6.65697	6.496	6.92583	6.26319	1.44223	0.166993	-1.51658	-0.600822	0.406821	0.705911
hsa-miR-6854-5p	16.5825	18.2095	12.5911	35.8514	24.3161	45.316	52.936	20.2761	10.2283	1.49726	0.582329	0.404006	0.705911
hsa-miR-1973	0.542879	0.892106	0.935342	0.0802044	2.10681	0.871462	0.843122	0.254511	0.333986	-1.58214	-0.661874	0.405924	0.705911
hsa-miR-4735-5p	1.23382	1.3644	0.791443	0.0802044	3.59914	0.779729	0.662453	1.56949	0.459231	-1.60959	-0.686696	0.405056	0.705911
hsa-miR-4468	0.888347	0.419815	0.0359747	0.160409	1.05341	0.504531	0.180669	1.61191	1.04371	1.65519	0.726995	0.405437	0.705911
hsa-miR-1292-5p	16.5331	15.9005	50.6164	56.6243	54.5137	16.466	15.3569	46.0666	21.6674	-1.55919	-0.640797	0.406425	0.705911
hsa-miR-615-5p	7.60031	3.51595	3.59747	13.9556	10.3585	7.84316	3.9145	4.66604	5.46903	-1.41686	-0.502699	0.406893	0.705911
hsa-miR-3658	1.33252	1.78421	1.65484	3.84981	0.965622	0.825596	0.60223	2.75721	1.04371	-1.4488	-0.534856	0.404262	0.705911
hsa-miR-155-3p	1.03641	1.62678	0.431696	0.240613	0.0877838	0.366931	1.62602	2.24818	0.333986	1.62636	0.701643	0.407993	0.707233
hsa-miR-4484	1.8754	3.83081	1.40301	1.7645	1.93124	1.88052	2.58959	1.27256	0.125245	-1.48423	-0.56971	0.409961	0.708298
hsa-miR-3938	1.18446	1.20697	4.60476	0	2.63351	0.779729	0.662453	8.61097	2.4214	1.61132	0.688246	0.409387	0.708298
hsa-miR-4697-3p	8.83412	6.97942	13.6704	28.633	21.507	7.93489	9.51524	15.2707	10.9798	-1.45302	-0.539055	0.409575	0.708298
hsa-miR-676-3p	4.29368	3.98824	10.6125	14.918	1.14119	2.61439	4.09517	7.63534	4.71756	-1.46687	-0.552744	0.409719	0.708298
hsa-miR-21-5p	289875	357855	100843	634244	647553	101349	272750	291370	404783	-1.51768	-0.601864	0.410341	0.708371
hsa-miR-155-5p	1368.75	1802.79	401.837	1156.31	683.924	1548.13	1487.33	1482.7	2103.74	1.52899	0.612576	0.41149	0.70977
hsa-miR-221-5p	36.669	47.9114	0.791443	4.97268	5.09146	39.0323	60.7048	9.20483	16.7411	1.64491	0.718008	0.413081	0.711342
hsa-miR-1285-3p	2.12216	1.3644	7.87846	1.52388	0.790054	1.74292	1.86691	3.35107	0.208741	-1.53871	-0.621718	0.412871	0.711342
hsa-miR-1291	27.292	18.3144	12.0515	10.5068	5.53038	41.4174	25.7755	12.1317	7.93218	1.47727	0.562933	0.414851	0.713803
hsa-miR-371a-3p	2.71439	4.40805	3.74137	2.88736	1.75568	2.75199	1.08401	1.69674	3.25637	-1.41606	-0.501885	0.418033	0.717377
hsa-miR-6822-3p	3.60274	2.78127	9.67719	3.12797	3.248	1.37599	2.71004	18.6218	4.13308	1.49051	0.575808	0.418288	0.717377
hsa-miR-6752-5p	1.92475	1.31192	5.2523	4.65186	3.42357	3.34825	3.19182	1.78158	0.960211	-1.43238	-0.518419	0.418298	0.717377
hsa-miR-3152-5p	23.5906	27.1305	22.2683	2.72695	4.21362	9.99888	13.0082	9.16241	10.7293	-1.49369	-0.578885	0.417589	0.717377
hsa-miR-6825-5p	2.41828	2.36146	5.03646	4.41124	2.10681	1.88052	1.80669	3.05414	2.58839	-1.40414	-0.489684	0.418763	0.717585
hsa-miR-1322	1.67799	0.83963	1.15119	0.160409	0.351135	1.42186	0.843122	1.39981	1.66993	1.52396	0.607822	0.42035	0.717931
hsa-miR-551a	1.13511	0.577245	1.83471	3.44879	1.49232	1.92639	1.50558	0.721116	0.459231	-1.4676	-0.553458	0.420821	0.717931
hsa-miR-7113-3p	2.56634	2.51889	3.74137	12.1911	5.09146	3.30238	4.27584	5.55683	1.79518	-1.39178	-0.476929	0.419928	0.717931
hsa-miR-6868-5p	2.36893	2.51889	10.2168	3.28838	1.22897	1.69706	2.22825	5.30232	1.66993	-1.44957	-0.535625	0.421022	0.717931
hsa-miR-4253	4.83656	5.71998	2.33835	3.36859	3.95027	5.82504	6.74498	7.33841	2.4214	1.37794	0.462512	0.420276	0.717931
hsa-miR-623	3.01051	3.6209	4.96451	3.93002	8.77838	2.66025	12.4059	6.82939	5.63602	1.41816	0.504023	0.420352	0.717931
hsa-miR-3193	1.67799	1.83669	1.15119	0.0802044	3.33578	2.43092	2.3487	1.48465	3.08937	1.4501	0.536156	0.421801	0.718581
hsa-miR-592	1.82605	2.62384	5.2523	4.73206	8.95395	3.99038	2.10781	1.90884	5.09329	-1.41734	-0.503186	0.422089	0.718581
hsa-miR-1301-5p	1.38187	1.10201	6.54739	0.320818	4.65254	1.78879	2.22825	1.39981	2.08741	-1.4994	-0.58439	0.423368	0.719865
hsa-miR-644a	4.04692	3.67338	7.98638	8.34126	12.0264	6.87996	5.35985	20.1064	8.80889	1.43142	0.517446	0.423531	0.719865
hsa-miR-548u	4.44174	3.88329	3.59747	3.529	8.07611	3.80691	6.92565	7.84743	7.05546	1.37519	0.459633	0.425199	0.720634
hsa-miR-6863	3.05986	1.52183	2.73408	3.84981	4.30141	1.74292	2.40892	5.68409	7.76518	1.43363	0.519677	0.424695	0.720634
hsa-miR-4718	99.3469	77.8756	12.4113	19.7303	43.5408	75.6337	116.532	67.7	63.2904	1.59669	0.675083	0.42536	0.720634
hsa-miR-3122	6.4652	6.19227	3.38162	0.240613	3.59914	2.24745	3.37249	2.67237	2.54665	-1.47437	-0.560102	0.424722	0.720634
hsa-miR-3907	1.48058	0.944583	0.467671	2.80716	0.614487	1.14666	1.02379	3.35107	1.75343	1.45944	0.545415	0.426225	0.720933
hsa-miR-1302	1.08576	0.892106	5.57608	0.320818	2.1946	0.64213	0.963568	3.35107	0.417483	-1.50706	-0.591739	0.425931	0.720933
hsa-miR-653-5p	2.51698	1.62678	4.02916	2.32593	3.33578	0.550397	1.32491	1.31498	4.46707	-1.44192	-0.527994	0.427916	0.723209
hsa-miR-8062	6.5639	5.45759	4.78463	6.97779	1.93124	4.17384	4.75762	0.975627	4.59231	-1.4245	-0.510452	0.428807	0.723547
hsa-miR-4769-3p	3.15857	1.73174	2.01458	0.401022	2.54573	2.43092	1.32491	3.39349	4.25833	1.44125	0.527324	0.428526	0.723547
hsa-miR-3163	1.38187	1.20697	1.94263	0.0802044	0.70227	0.321065	1.5658	2.75721	1.83693	1.49107	0.576351	0.429618	0.724131
hsa-miR-4786-3p	3.80015	4.93282	7.98638	8.26106	5.61816	3.43998	3.6736	16.4584	10.8128	1.40628	0.491881	0.430031	0.724131
hsa-miR-601	123.184	125.735	49.9688	143.646	181.537	273.135	187.053	164.075	201.895	1.65548	0.727249	0.43019	0.724131
hsa-miR-4786-5p	2.27022	1.73174	6.43947	3.12797	1.31676	1.37599	1.86691	5.9386	7.89043	1.42506	0.511022	0.431012	0.724344
hsa-miR-6882-3p	1.43123	1.15449	4.13709	4.57165	9.65622	1.42186	1.38513	5.04781	3.29812	-1.49119	-0.576468	0.431355	0.724344
hsa-miR-4503	15.9409	4.35558	45.0763	0.882249	2.89687	14.3562	12.5866	48.1875	11.9818	1.57202	0.652622	0.431001	0.724344
hsa-miR-1278	3.7508	2.83375	0.323772	0.561431	13.2554	4.12798	1.98736	3.26623	1.16895	-1.56495	-0.646114	0.434146	0.725418
hsa-miR-9902	1.28317	1.67926	2.6981	1.44368	1.66789	0.412798	0.843122	3.35107	0	-1.52429	-0.608136	0.433766	0.725418
hsa-miR-6857-3p	2.22087	3.04366	3.70539	1.28327	5.53038	2.10986	1.38513	1.1453	4.17483	-1.42467	-0.510632	0.433718	0.725418
hsa-miR-3135a	3.7508	4.51301	9.02965	15.7201	2.89687	2.10986	2.04758	14.3799	0.333986	-1.52084	-0.604871	0.433194	0.725418
hsa-miR-4515	1.8754	2.2565	2.4103	3.529	4.38919	1.42186	1.50558	0.636279	4.46707	-1.42605	-0.512022	0.43442	0.725418
hsa-miR-4694-5p	0.9377	0.629722	0.0719494	1.44368	0.0877838	0.321065	1.02379	0.0848371	0.125245	-1.65285	-0.724953	0.433069	0.725418
hsa-miR-578	10.2653	16.5302	5.684	10.587	6.32043	9.86128	4.21561	4.53879	9.47686	-1.40526	-0.490841	0.433182	0.725418
hsa-miR-339-5p	13.9668	13.9064	19.3904	31.8412	15.8011	23.0708	45.0468	15.2707	23.2956	1.40509	0.490658	0.434897	0.725637
hsa-miR-3620-3p	3.45468	3.6209	20.9373	1.8447	6.05708	5.54984	3.97472	25.8753	7.93218	1.50398	0.588787	0.435333	0.725787
hsa-miR-4704-5p	0.789642	1.04954	0.503646	1.04266	0	0.963195	1.02379	1.27256	0.918463	1.50234	0.587209	0.436371	0.725846
hsa-miR-4287	7.10678	7.76657	12.9149	23.4197	16.3278	6.78823	7.70855	12.2165	11.5643	-1.40579	-0.491377	0.436144	0.725846
hsa-miR-526b-5p	1.97411	1.78421	1.87068	1.8447	3.51135	2.56852	0.903345	0.721116	2.00392	-1.39492	-0.480178	0.436409	0.725846
hsa-miR-509-3p	5.77426	3.98824	2.94992	1.68429	7.37384	4.31144	3.61338	1.52707	2.75539	-1.42587	-0.511838	0.437258	0.726681
hsa-miR-653-3p	4.19497	2.41393	2.12251	0.561431	5.79373	1.88052	3.01115	2.62995	1.00196	-1.41625	-0.502073	0.439508	0.729841
hsa-miR-3934-5p	3.70145	3.09613	7.66261	2.00511	1.49232	1.55946	1.20446	2.5027	4.8428	-1.42983	-0.515845	0.440094	0.730236
hsa-miR-6786-3p	0.592232	0.472292	0.179873	0	0.877838	0.504531	0.120446	1.90884	0.208741	1.62219	0.697942	0.441301	0.731658
hsa-miR-4509	4.34303	4.88035	7.15896	8.74228	3.16022	12.6133	18.1874	0.933208	1.62818	1.471	0.556801	0.442959	0.733826
hsa-miR-4715-3p	2.02346	1.62678	5.86387	7.2986	3.16022	1.65119	1.50558	5.34474	2.83888	-1.40304	-0.488557	0.443771	0.73459
hsa-miR-4290	4.09627	2.78127	15.2892	5.93513	6.84714	1.14666	1.14424	5.76893	11.272	-1.44591	-0.531973	0.444248	0.734799
hsa-miR-3183	1.28317	1.20697	3.74137	8.9829	7.81276	0.917328	1.74647	4.53879	5.46903	-1.44488	-0.530948	0.445685	0.734854
hsa-miR-519d-5p	1.57928	1.31192	3.56149	2.80716	0.70227	2.43092	2.04758	5.81134	1.04371	1.41037	0.496077	0.445192	0.734854
hsa-miR-4640-5p	4.49109	4.25062	2.23043	4.09043	7.54941	16.6036	6.92565	2.12093	0.709721	1.4583	0.544284	0.44517	0.734854
hsa-miR-1297	9497.42	10267.4	8557.01	11861.6	14648.1	15468.1	20749.8	12640	13769	1.42772	0.513713	0.445641	0.734854
hsa-miR-551b-5p	2.31957	2.46641	0.719494	4.57165	6.75935	2.06399	2.04758	2.16335	3.00588	-1.43124	-0.517263	0.446328	0.735335
hsa-miR-4436b-3p	0.888347	0.682199	2.91395	0.240613	4.30141	1.05493	1.20446	3.94493	4.50882	1.48646	0.571882	0.447362	0.736459
hsa-miR-3936	1.28317	1.88917	0.251823	1.92491	0.614487	1.33013	0.782899	1.99367	2.67189	1.43244	0.518475	0.447888	0.736746
hsa-miR-4722-3p	15.0032	14.1163	10.9723	8.82249	18.6102	16.9247	25.2334	14.083	20.1227	1.41375	0.499525	0.449368	0.738601
hsa-miR-3144-3p	0.690937	0.262384	0.0719494	1.20307	0.0877838	0.0458664	0.180669	2.67237	0.208741	1.67998	0.748444	0.450331	0.739603
hsa-miR-543	70.0314	97.7644	5.64803	17.3242	16.6789	90.1734	94.1286	46.2787	37.5317	1.61489	0.69144	0.453803	0.740767
hsa-miR-10524-5p	1.82605	2.46641	1.00729	2.72695	3.33578	2.15572	1.92714	0.678697	1.71168	-1.38552	-0.470425	0.454909	0.740767
hsa-miR-4680-5p	1.08576	0.419815	2.19446	1.04266	2.10681	0.871462	1.38513	0.212093	1.25245	-1.48177	-0.567318	0.454437	0.740767
hsa-miR-3928-5p	2.12216	1.67926	0.215848	3.6092	1.58011	1.37599	2.22825	0.848371	0.626224	-1.4465	-0.532568	0.45154	0.740767
hsa-miR-339-3p	16.7799	18.6293	41.0111	54.6192	52.5825	20.7316	23.0052	28.9719	28.0131	-1.45661	-0.54261	0.452642	0.740767
hsa-miR-3960	25.1698	21.463	3.74137	3.76961	8.95395	6.8341	7.28699	29.9475	30.5598	1.47741	0.563069	0.452869	0.740767
hsa-miR-6834-5p	2.17152	3.04366	2.94992	0.0802044	0.438919	1.97226	3.01115	5.42958	0.292238	1.52308	0.606995	0.453369	0.740767
hsa-miR-6734-5p	5.47814	6.40218	1.97861	1.60409	2.28238	6.1461	4.63717	5.00539	4.13308	1.39226	0.477433	0.452921	0.740767
hsa-miR-3150a-3p	3.40533	3.04366	4.67671	0.561431	2.54573	2.93545	2.28848	6.87181	4.09133	1.40825	0.493905	0.454931	0.740767
hsa-miR-5587-5p	1.08576	1.04954	3.38162	6.09554	3.7747	0.871462	1.50558	4.62362	1.46119	-1.44406	-0.530135	0.454159	0.740767
hsa-miR-375-3p	12.881	9.49831	74.8633	13.7952	13.1676	18.4842	11.2015	15.0586	23.5043	-1.45744	-0.543438	0.453401	0.740767
hsa-miR-548aa	3.05986	3.93576	0.971317	0.401022	0.438919	2.66025	3.1316	1.78158	2.58839	1.4211	0.507009	0.455302	0.740795
hsa-miR-619-3p	7.84707	7.924	13.6704	28.7132	13.3431	11.0079	7.46766	11.4954	10.9381	-1.39346	-0.478671	0.457186	0.742705
hsa-miR-624-5p	6.61325	5.98236	5.18035	9.14331	11.1485	4.44904	9.45502	5.89618	2.58839	-1.35848	-0.441994	0.457093	0.742705
hsa-miR-122b-3p	154.178	185.611	1.43899	1.60409	2.1946	183.007	210.72	44.2426	51.8096	1.77412	0.827102	0.460334	0.742966
hsa-miR-3125	8.83412	6.24474	6.22362	9.38392	6.84714	8.53115	9.51524	9.24725	12.775	1.34322	0.425698	0.461032	0.742966
hsa-miR-6858-3p	2.91181	2.2565	4.46086	0.802044	4.03806	4.40318	3.9145	3.09656	4.9263	1.39961	0.485022	0.457707	0.742966
hsa-miR-10397-3p	1.18446	1.20697	1.72678	2.32593	1.49232	1.10079	0.963568	2.16335	0.125245	-1.45208	-0.538119	0.462314	0.742966
hsa-miR-1224-3p	1.67799	1.62678	1.79873	2.40613	4.38919	5.96264	4.03494	2.07851	1.08546	1.39273	0.477915	0.462135	0.742966
hsa-miR-8088	1.33252	2.09907	0.107924	0.320818	0.790054	1.97226	1.14424	0.466604	2.12916	1.52354	0.607425	0.461253	0.742966
hsa-miR-3616-3p	1.62864	2.30898	0.719494	0.72184	0.351135	2.06399	2.04758	2.58753	0.0834966	1.45975	0.545722	0.46203	0.742966
hsa-miR-187-5p	5.87296	9.23592	8.20223	32.563	5.61816	6.5589	16.4409	4.41153	7.51469	-1.40817	-0.493822	0.45986	0.742966
hsa-miR-4294	11.9433	15.6906	156.706	243.581	72.5094	15.8239	18.1271	129.504	525.277	1.72036	0.782711	0.460253	0.742966
hsa-miR-6071	2.41828	3.72586	3.74137	11.7098	5.17924	4.90771	1.98736	1.39981	7.09721	-1.38372	-0.468557	0.460415	0.742966
hsa-miR-3157-3p	1.18446	1.73174	6.00777	2.00511	2.80908	1.10079	1.02379	4.19944	1.50294	-1.40717	-0.492793	0.461102	0.742966
hsa-miR-4639-5p	3.60274	4.46053	12.0155	4.09043	0.877838	2.20159	3.07137	1.86642	7.22246	-1.40175	-0.487227	0.458973	0.742966
hsa-miR-647	9.96923	12.4895	8.84977	16.2815	10.2707	17.154	14.4535	11.7075	19.0372	1.35376	0.436973	0.461138	0.742966
hsa-miR-335-3p	31.8818	27.9177	264.846	1102.17	698.584	23.8047	20.8974	302.19	623.219	-1.75263	-0.809525	0.459485	0.742966
hsa-miR-6765-3p	42.1965	48.0688	7.23091	14.0358	11.6752	37.3353	38.0007	38.4736	33.7326	1.49567	0.580788	0.463208	0.743832
hsa-miR-214-3p	168.539	179.786	757.771	347.365	107.886	347.025	348.21	636.533	607.73	1.55259	0.634681	0.464056	0.743867
hsa-miR-6073	2.17152	1.78421	1.58289	0.320818	0.0877838	1.37599	2.10781	1.44223	2.04567	1.42223	0.508153	0.464295	0.743867
hsa-miR-4776-3p	28.5752	23.8245	32.1973	4.09043	9.83179	20.594	20.3554	5.34474	7.72344	-1.46187	-0.547818	0.464227	0.743867
hsa-miR-519a-3p	0.592232	1.15449	1.43899	2.56654	3.07243	0.504531	0.662453	0.0424186	3.33986	-1.53785	-0.620916	0.465683	0.745521
hsa-miR-6074	4.63915	4.25062	3.88527	1.52388	8.16389	2.79785	2.77026	4.70846	3.08937	-1.33763	-0.419679	0.467172	0.746212
hsa-miR-3667-3p	10.8576	10.7578	7.69858	9.94535	13.9576	17.4292	14.7546	8.86548	16.6576	1.36128	0.444969	0.46861	0.746212
hsa-miR-29b-1-5p	21.7152	32.0634	20.1458	48.6039	53.987	75.4961	77.8082	38.304	24.9655	1.5349	0.618145	0.467563	0.746212
hsa-miR-5699-5p	0.592232	0.629722	1.72678	1.28327	0.0877838	0.412798	0.542007	1.86642	2.4214	1.49451	0.579676	0.467623	0.746212
hsa-miR-4466	3.10922	2.9387	7.19494	6.25595	7.63719	5.22877	4.57695	6.15069	13.1507	1.34599	0.42867	0.468491	0.746212
hsa-miR-5001-3p	12.0914	12.0697	5.86387	15.2388	10.0951	8.66875	9.81635	4.41153	9.72735	-1.35536	-0.438673	0.468488	0.746212
hsa-miR-2355-3p	4.54044	6.40218	25.0024	5.77472	4.30141	4.03625	5.05873	9.54418	8.01567	-1.38565	-0.470563	0.467046	0.746212
hsa-miR-4428	5.28073	6.45465	3.56149	3.529	0.614487	4.67838	4.27584	0.212093	1.54469	-1.45899	-0.544966	0.470376	0.747886
hsa-miR-1238-3p	1.08576	2.0466	4.24501	0	4.03806	3.07305	2.04758	1.23014	7.4312	1.50483	0.589597	0.470331	0.747886
hsa-miR-6510-5p	3.45468	4.35558	135.553	17.3242	10.973	13.8058	6.20297	78.4743	136.976	1.7138	0.777195	0.470988	0.748291
hsa-miR-5009-3p	0.74029	0.944583	1.04327	0.0802044	0.438919	0.825596	0.903345	1.73916	0.50098	1.45228	0.538322	0.472138	0.749551
hsa-miR-6826-5p	5.82361	4.82787	0.61157	0	0.614487	2.84372	2.10781	1.01805	0.0417483	-1.58666	-0.665991	0.472835	0.750088
hsa-miR-181a-3p	292.02	273.509	92.5629	245.827	283.191	331.66	436.376	383.125	324.134	1.55363	0.635646	0.47366	0.750245
hsa-miR-1282	1.48058	1.15449	3.09382	2.08532	7.28606	1.37599	1.80669	1.48465	3.88259	-1.3989	-0.484293	0.474008	0.750245
hsa-miR-1288-3p	1.92475	2.57137	4.49684	3.84981	3.33578	1.19253	0.662453	2.24818	5.17679	-1.38701	-0.471979	0.473346	0.750245
hsa-miR-3128	0.838995	0.472292	0.251823	0.72184	1.84346	0.412798	0.421561	0.254511	1.04371	-1.48506	-0.570517	0.474374	0.750256
hsa-miR-516a-5p	1.28317	0.99706	1.61886	0.160409	2.54573	0.366931	0.963568	2.03609	0.166993	-1.49453	-0.579693	0.47644	0.752954
hsa-miR-634	4.14562	5.82493	6.04375	14.4368	6.93492	6.32957	6.86543	2.9693	6.0535	-1.34139	-0.423733	0.477712	0.753209
hsa-miR-581	5.03397	4.72292	1.69081	4.01022	6.496	3.66931	4.03494	2.2906	2.79714	-1.36515	-0.449054	0.477909	0.753209
hsa-miR-24-3p	7806.85	10713.6	20412	49432.7	23245	5575.02	25012.4	10451.6	20992.3	-1.4394	-0.52547	0.477185	0.753209
hsa-miR-7974	24.3802	33.3753	14.3179	28.4726	11.0608	46.2792	33.7249	23.9665	21.5839	1.40521	0.490786	0.47804	0.753209
hsa-miR-521	0.74029	0.787153	23.9232	1.60409	0.0877838	0.596264	0.963568	7.50809	4.55056	-1.59709	-0.675445	0.478892	0.753985
hsa-miR-1261	44.9603	46.3371	42.594	66.8103	101.654	103.245	69.9792	91.0727	98.8182	1.50347	0.588297	0.479949	0.755081
hsa-miR-4316	5.47814	4.40805	1.58289	7.94024	4.82811	3.07305	4.75762	5.51441	12.6497	1.34713	0.429891	0.481494	0.756944
hsa-miR-6882-5p	4.14562	2.88623	2.37433	4.49145	6.84714	3.21065	2.40892	0.975627	5.59427	-1.35049	-0.433486	0.482348	0.757149
hsa-miR-1257	1.23382	1.78421	3.70539	0.160409	0.351135	0.871462	0.60223	2.33302	0.166993	-1.47347	-0.559213	0.482275	0.757149
hsa-miR-9898	2.51698	2.9387	1.36704	0.160409	1.84346	1.28426	1.32491	0.254511	2.17091	-1.41047	-0.496172	0.482731	0.757182
hsa-miR-4722-5p	3.35598	2.7288	12.6271	2.88736	2.1946	3.02718	3.49294	9.45934	10.3536	1.37503	0.459462	0.483181	0.757321
hsa-miR-598-5p	6.02102	5.98236	1.65484	0.0802044	0.263351	4.35731	1.68624	1.1453	0.125245	-1.53706	-0.620171	0.484429	0.758709
hsa-miR-4523	1.72734	1.57431	0.971317	0.0802044	3.16022	0.687996	0.782899	1.01805	1.58644	-1.46179	-0.547737	0.485492	0.759806
hsa-miR-12135	281.162	382.766	2.08653	2.40613	3.68692	275.061	365.192	173.322	134.722	1.76351	0.81845	0.487042	0.761094
hsa-miR-138-1-3p	1.67799	1.46935	10.6845	45.4759	1.93124	6.8341	8.97323	11.7499	46.3824	1.50993	0.59448	0.486941	0.761094
hsa-miR-3714	1.77669	2.0466	9.46134	4.33104	1.58011	0.733863	0.240892	6.15069	3.42336	-1.45666	-0.542668	0.488121	0.762211
hsa-miR-4781-5p	3.05986	1.3644	15.577	3.12797	8.07611	3.89865	3.85427	10.4774	16.6576	1.39513	0.480395	0.489816	0.763487
hsa-miR-6774-3p	12.7823	12.9093	4.46086	22.1364	30.1098	44.1235	13.0684	12.3438	23.6295	1.41599	0.501816	0.489811	0.763487
hsa-miR-593-3p	1.92475	2.15155	1.87068	3.36859	6.23265	2.06399	2.46914	9.33208	3.21462	1.38728	0.472257	0.490032	0.763487
hsa-miR-4446-3p	16.2864	25.1889	15.7569	43.3104	51.0024	16.8788	15.1762	74.2749	73.3518	1.48346	0.568961	0.490919	0.764301
hsa-miR-5008-5p	12.8317	7.924	42.0184	21.0938	15.45	21.1903	20.7167	20.6578	48.1775	1.39237	0.477539	0.492745	0.766574
hsa-miR-6783-5p	18.6553	15.4282	69.9348	11.0682	14.3965	12.7967	23.7279	80.468	38.7424	1.50183	0.586721	0.494852	0.768709
hsa-miR-4270	1.62864	1.78421	2.33835	4.41124	0.790054	1.83466	1.44535	1.90884	1.33595	-1.33738	-0.419405	0.494672	0.768709
hsa-miR-181a-5p	14139	17379.6	10591.8	11897.7	11851.8	10103	14440.5	6834.82	6372.92	-1.39567	-0.480958	0.495692	0.769444
hsa-miR-1247-3p	1.33252	1.41687	1.04327	2.72695	0.175568	1.92639	1.26468	1.56949	2.5049	1.35898	0.44252	0.496652	0.770363
hsa-miR-3683	6.07037	6.76951	1.36704	7.61942	1.40454	9.31088	8.91301	2.58753	4.75931	1.37389	0.458266	0.498103	0.770996
hsa-miR-3191-3p	1.57928	2.20403	2.19446	0.802044	5.09146	2.52265	2.04758	4.66604	3.50686	1.35543	0.438755	0.497504	0.770996
hsa-miR-3191-5p	110.698	100.178	7.91443	12.9931	10.5341	152.506	89.7925	29.5657	29.9753	1.55653	0.63833	0.498165	0.770996
hsa-miR-6514-3p	9.62376	10.8102	17.4837	10.5068	8.07611	10.6869	10.2981	20.573	19.3712	1.34358	0.426077	0.498701	0.771255
hsa-miR-328-5p	1.52993	2.36146	1.29509	1.44368	3.86249	1.28426	0.963568	7.04148	2.25441	1.38666	0.471617	0.499807	0.772395
hsa-miR-6770-5p	3.70145	7.81905	12.8789	4.81227	5.09146	3.85278	2.3487	17.0523	14.6119	1.37717	0.461705	0.500259	0.772524
hsa-miR-513b-3p	2.8131	1.94164	0.575595	0	2.37016	1.10079	1.80669	0.636279	5.34378	1.43917	0.525237	0.500767	0.772739
hsa-miR-671-5p	22.258	27.3929	15.7929	65.4468	26.8618	26.098	34.3873	79.6197	43.8357	1.459	0.544984	0.501847	0.773835
hsa-miR-15a-3p	7.00807	12.1746	6.22362	15.3993	6.58379	4.21971	5.05873	6.44762	12.9837	-1.31643	-0.396633	0.503097	0.775192
hsa-miR-7706	4.73785	6.87447	0.61157	0.641636	0.790054	4.12798	3.43271	3.30865	4.63406	1.41045	0.49615	0.504398	0.775484
hsa-miR-7112-3p	1.38187	1.3644	0.791443	0.0802044	0.175568	1.00906	1.92714	0.466604	1.2107	1.46	0.545965	0.504163	0.775484
hsa-miR-4263	8.04448	7.13685	1.76276	6.25595	1.05341	9.17328	9.21412	4.96297	3.17287	1.36276	0.446529	0.504102	0.775484
hsa-miR-3129-3p	0.888347	1.83669	3.38162	2.48634	1.93124	1.55946	0.963568	3.26623	0.459231	-1.34664	-0.429365	0.505392	0.776442
hsa-miR-6800-5p	2.36893	2.30898	1.94263	2.32593	3.59914	3.16478	7.52788	1.44223	1.41944	1.34632	0.429023	0.506968	0.778293
hsa-miR-4676-5p	4.09627	4.56549	2.05056	5.61431	2.01903	3.39412	4.09517	2.62995	0.667973	-1.36458	-0.448456	0.508493	0.778725
hsa-miR-759	3.10922	10.7578	2.62615	2.40613	0.526703	3.25652	4.51673	2.9693	0.25049	-1.41985	-0.505743	0.512828	0.778725
hsa-miR-5090	0.74029	0.787153	0.647544	0.240613	1.93124	3.25652	0.722676	0.0424186	1.1272	1.48511	0.570574	0.511576	0.778725
hsa-miR-10394-5p	1.72734	2.41393	1.15119	6.09554	0.877838	1.97226	1.98736	1.44223	1.87867	-1.33784	-0.419909	0.512824	0.778725
hsa-miR-4771	0.888347	0.209907	0.251823	1.92491	0.263351	0.504531	0.361338	0.89079	0.125245	-1.47466	-0.560378	0.511871	0.778725
hsa-miR-6499-3p	153.635	166.929	30.1468	44.4333	60.483	129.297	147.787	131.201	135.097	1.49042	0.575722	0.510918	0.778725
hsa-miR-8075	2.46763	3.46347	3.09382	0.962453	2.80908	5.32051	3.79405	1.31498	3.46511	1.3433	0.425783	0.511397	0.778725
hsa-miR-6124	3.50404	3.83081	6.94311	8.58188	3.86249	1.83466	4.15539	3.01172	6.97197	-1.33701	-0.419014	0.508607	0.778725
hsa-miR-4433a-5p	3.6521	5.14273	4.49684	3.12797	20.6292	19.7684	6.92565	9.79869	3.88259	1.36616	0.450131	0.511104	0.778725
hsa-miR-877-5p	23.2944	31.4336	35.6149	36.7336	5.79373	17.3375	26.739	16.5432	17.6178	-1.36038	-0.444014	0.512581	0.778725
hsa-miR-4266	2.46763	1.46935	7.84248	0.0802044	0.175568	1.92639	2.64981	9.75627	0.292238	1.50757	0.592227	0.512267	0.778725
hsa-let-7a-3p	386.382	434.981	909.62	2300.66	3524.7	302.03	511.836	1767.58	1524.06	-1.4724	-0.558168	0.509908	0.778725
hsa-miR-5571-3p	4.39238	2.99118	1.04327	2.16552	3.16022	2.75199	2.3487	0.975627	2.12916	-1.34026	-0.422511	0.511313	0.778725
hsa-miR-548aw	1.18446	2.0466	2.77005	0.160409	2.98465	1.42186	1.80669	0.848371	1.33595	-1.36262	-0.446387	0.51057	0.778725
hsa-miR-491-3p	1.03641	1.10201	0.61157	0	1.58011	0.275199	0.481784	0.169674	1.41944	-1.46932	-0.555152	0.511974	0.778725
hsa-miR-5585-5p	0.493526	0.419815	0.0719494	0.481227	0.70227	0.412798	0.180669	0.169674	0.333986	-1.46055	-0.546515	0.513969	0.779893
hsa-miR-8056	5.87296	9.13097	2.05056	10.7474	0.790054	2.66025	5.4803	19.2156	4.63406	1.39834	0.483711	0.515696	0.781946
hsa-miR-1295a	2.61569	2.7288	2.08653	0.0802044	0.526703	1.33013	1.86691	1.69674	4.21658	1.39608	0.481377	0.517522	0.784147
hsa-miR-6165	31.8325	43.5033	737.445	1201.86	433.125	51.9208	31.6773	400.601	738.11	-1.60203	-0.679899	0.519666	0.784254
hsa-miR-6890-5p	2.66504	3.56843	0.575595	0.160409	0.263351	2.33919	2.83048	1.52707	1.46119	1.38971	0.474786	0.519104	0.784254
hsa-miR-6734-3p	7.69901	6.08731	7.69858	5.4539	11.8508	7.52209	7.5881	11.0288	13.9857	1.29965	0.378123	0.521534	0.784254
hsa-miR-324-5p	13.2265	17.8421	18.9227	21.7354	29.4076	13.0719	15.8989	11.1561	20.0809	-1.33948	-0.421677	0.521712	0.784254
hsa-miR-6811-3p	4.19497	3.20109	4.82061	6.89758	1.40454	2.88958	3.49294	3.52074	11.5225	1.30411	0.383067	0.518595	0.784254
hsa-miR-4634	7.74836	5.40512	1.97861	0.160409	0.877838	3.02718	3.73383	1.99367	0.125245	-1.46383	-0.549748	0.521191	0.784254
hsa-miR-3684	0.74029	1.57431	0.107924	0.160409	0.70227	0.871462	0.481784	1.23014	1.16895	1.42302	0.508954	0.519981	0.784254
hsa-miR-95-3p	3.50404	3.77833	1.33106	3.04777	0.614487	1.97226	2.04758	1.10288	2.21266	-1.34753	-0.430321	0.51874	0.784254
hsa-miR-7158-3p	7.45225	9.34088	22.9878	25.906	20.5414	6.37543	8.85279	28.5477	7.01371	-1.35683	-0.440235	0.521173	0.784254
hsa-miR-5585-3p	1.97411	1.25944	4.78463	0.240613	2.28238	1.23839	0.963568	1.52707	2.5049	-1.36314	-0.446931	0.521232	0.784254
hsa-miR-3059-5p	1.67799	1.67926	5.03646	0.240613	8.07611	0.504531	1.32491	4.28428	3.38161	-1.40426	-0.489807	0.519602	0.784254
hsa-miR-3120-3p	1.67799	1.15449	2.01458	0.0802044	1.93124	0.917328	0.843122	0.0424186	1.96217	-1.46254	-0.548477	0.522461	0.784815
hsa-miR-4661-3p	6.81066	5.92988	50.5085	27.4299	8.07611	14.2186	15.7182	37.3708	42.959	1.39465	0.479901	0.52323	0.785408
hsa-miR-103a-1-5p	4.98462	5.98236	4.17306	15.7201	8.33946	4.67838	4.81784	3.77525	10.6458	-1.30378	-0.3827	0.52466	0.786989
hsa-miR-7161-3p	8.73542	5.30016	33.6004	3.04777	4.74033	5.5957	5.66096	15.6949	5.46903	-1.37082	-0.455038	0.525403	0.787278
hsa-miR-380-3p	6.02102	12.7519	1.69081	1.04266	0.263351	4.03625	9.33457	5.2599	5.76127	1.39458	0.479834	0.525743	0.787278
hsa-miR-6747-3p	5.47814	4.51301	11.7637	9.54433	13.0798	5.36637	4.57695	7.80502	9.39337	-1.30243	-0.3812	0.526758	0.787278
hsa-miR-532-3p	8.09383	7.45171	15.685	31.8412	12.7287	4.95357	5.78141	24.3907	49.2212	1.39196	0.477116	0.526785	0.787278
hsa-miR-10394-3p	5.67555	3.98824	0.935342	4.25084	2.89687	6.2837	4.39628	4.83572	2.83888	1.2945	0.372398	0.526337	0.787278
hsa-miR-585-3p	3.55339	3.09613	0.143899	0.641636	2.10681	2.93545	1.86691	0.29693	0.25049	-1.43147	-0.517494	0.527108	0.787278
hsa-miR-600	0.394821	0.83963	1.00729	0.320818	1.22897	0.366931	0.60223	1.10288	0.0417483	-1.43857	-0.524633	0.528038	0.788105
hsa-miR-4700-3p	1.38187	1.88917	2.73408	2.72695	0.70227	0.687996	1.02379	0.721116	3.17287	-1.34918	-0.432084	0.529577	0.789278
hsa-miR-579-3p	9.377	9.02602	3.09382	2.16552	1.05341	4.31144	3.79405	2.75721	4.30007	-1.31071	-0.390346	0.529391	0.789278
hsa-miR-4777-5p	1.48058	1.62678	6.54739	5.29349	3.68692	1.37599	2.28848	11.0712	5.38553	1.34998	0.432939	0.530808	0.790549
hsa-miR-4427	1.92475	1.31192	1.25911	0.0802044	2.37016	1.23839	2.10781	2.2906	1.83693	1.33908	0.421243	0.531502	0.79102
hsa-miR-5582-3p	2.91181	3.04366	0.107924	1.44368	3.42357	2.98132	2.95093	4.92055	1.04371	1.36322	0.44702	0.532339	0.791483
hsa-miR-1825	4.63915	4.88035	14.3899	6.33615	0.70227	5.96264	13.0082	12.8104	2.12916	1.36377	0.447599	0.533325	0.791483
hsa-miR-3119	4.04692	5.35264	0.647544	5.3737	0.438919	1.28426	2.58959	7.42325	6.26224	1.38341	0.468228	0.53317	0.791483
hsa-miR-4437	2.36893	3.30604	1.97861	4.97268	4.12584	2.10986	4.27584	0.466604	3.17287	-1.33453	-0.416334	0.532862	0.791483
hsa-miR-4655-3p	10.9563	11.335	4.89256	4.17063	7.98833	12.9802	7.5881	9.24725	11.0216	1.29566	0.373683	0.534174	0.792182
hsa-miR-16-1-3p	1.67799	2.09907	1.61886	3.93002	0.263351	1.23839	2.52937	1.52707	0.417483	-1.35114	-0.434179	0.535411	0.793454
hsa-miR-6812-3p	5.13267	4.82787	0.683519	0.240613	7.90054	3.57758	2.83048	0.763534	3.50686	-1.40547	-0.491048	0.537028	0.794168
hsa-miR-1306-3p	10.4134	6.29722	7.51871	11.6296	14.5721	5.64157	17.1636	3.52074	4.13308	-1.32611	-0.407199	0.537031	0.794168
hsa-miR-3605-5p	3.84951	4.14567	4.13709	8.02044	3.248	8.25596	7.70855	2.75721	5.34378	1.28647	0.363423	0.536397	0.794168
hsa-miR-148a-5p	4.14562	2.62384	2.37433	14.6774	3.86249	9.44848	4.03494	0.169674	2.29616	-1.38658	-0.471533	0.539227	0.794926
hsa-miR-3651	9.08088	7.97648	20.5415	5.85492	3.95027	8.43942	11.6833	13.6164	16.5741	1.31934	0.39982	0.538842	0.794926
hsa-miR-4299	10.9563	13.0143	3.23772	1.36348	8.07611	6.32957	7.40743	6.23553	1.96217	-1.33908	-0.421241	0.538431	0.794926
hsa-miR-4675	11.055	8.44877	2.73408	3.6092	2.28238	8.76049	7.10632	6.44762	7.2642	1.30799	0.387348	0.53914	0.794926
hsa-miR-192-3p	2.8131	2.88623	3.34565	2.32593	0.263351	4.40318	3.01115	2.16335	3.17287	1.34825	0.431092	0.539441	0.794926
hsa-miR-6508-5p	1.43123	1.73174	0	1.68429	1.22897	0.733863	1.08401	0.0848371	1.41944	-1.45909	-0.545069	0.540329	0.795674
hsa-miR-2276-5p	2.22087	1.52183	4.74866	9.14331	9.65622	1.74292	3.07137	4.28428	7.30595	-1.3231	-0.403925	0.541151	0.796325
hsa-miR-4297	1.92475	0.83963	12.843	17.9658	4.30141	2.79785	6.14275	6.87181	6.55448	-1.3541	-0.437329	0.541583	0.796401
hsa-miR-4778-3p	2.12216	1.52183	1.72678	0	5.88152	0.458664	1.08401	1.44223	3.42336	-1.39843	-0.483807	0.542248	0.796819
hsa-miR-6761-5p	3.10922	4.35558	2.26641	5.13308	5.61816	3.57758	7.88922	4.24186	5.21854	1.28854	0.365738	0.544043	0.798336
hsa-miR-1269a	4.54044	7.08437	5.61205	2.08532	6.75935	4.67838	6.44386	3.18139	2.12916	-1.27782	-0.353689	0.544009	0.798336
hsa-miR-3153	5.42879	5.30016	8.3821	6.81738	6.496	4.49491	4.09517	4.32669	7.4312	-1.27249	-0.347658	0.544784	0.798865
hsa-miR-605-3p	1.03641	1.04954	7.33884	0.0802044	0.263351	0.550397	0.301115	9.3745	1.37769	1.4729	0.558656	0.545269	0.799016
hsa-miR-10392-3p	33.9546	20.2561	9.82109	6.97779	2.63351	9.90715	7.04609	17.4764	47.8435	1.39508	0.480346	0.546173	0.799781
hsa-miR-135a-5p	150.772	226.438	62.9917	126.643	69.7881	229.699	96.658	6.70213	7.47295	-1.49569	-0.580815	0.547724	0.799816
hsa-miR-5693	5.97167	5.71998	9.56927	7.45901	6.496	7.93489	6.32342	5.04781	2.79714	-1.28109	-0.357371	0.547725	0.799816
hsa-miR-4736	0.789642	1.20697	0.899367	0.160409	0.965622	0.963195	1.26468	2.37544	0.0417483	1.42508	0.511042	0.546661	0.799816
hsa-miR-4753-3p	2.27022	1.78421	1.11522	5.4539	4.03806	1.74292	1.74647	2.54511	2.83888	-1.2961	-0.374182	0.547358	0.799816
hsa-miR-3935	1.33252	1.83669	0.719494	2.96756	2.01903	1.42186	0.782899	0.29693	2.75539	-1.33139	-0.412932	0.548797	0.800824
hsa-miR-744-3p	51.9683	51.06	59.5381	143.807	203.044	58.388	59.0788	105.962	63.3739	-1.42017	-0.506066	0.549616	0.801459
hsa-miR-3180	7.25484	6.45465	76.9858	3.20818	10.0951	4.63251	5.35985	99.8957	13.3595	1.48023	0.56582	0.55016	0.801694
hsa-miR-3156-3p	85.1826	81.3916	192.896	443.37	468.766	135.627	148.028	425.543	795.639	1.4794	0.56501	0.550649	0.801849
hsa-miR-6758-5p	4.5898	4.09319	1.25911	1.7645	1.75568	4.17384	3.01115	5.17507	1.62818	1.29123	0.368745	0.553955	0.805516
hsa-miR-8077	1.77669	2.51889	1.11522	4.17063	3.95027	2.84372	2.52937	2.9693	5.34378	1.28981	0.367163	0.554321	0.805516
hsa-miR-6864-5p	1.97411	1.78421	4.13709	3.04777	0.526703	2.20159	1.26468	2.62995	0.918463	-1.31979	-0.400312	0.553816	0.805516
hsa-miR-6871-5p	4.09627	3.56843	5.8279	9.14331	1.40454	8.02662	5.96208	4.92055	5.88651	1.28712	0.364146	0.556225	0.807162
hsa-miR-3190-5p	8.88347	8.13391	5.5401	13.8754	4.82811	15.0901	6.92565	10.435	9.7691	1.28243	0.358876	0.556035	0.807162
hsa-miR-92a-2-5p	2.61569	2.57137	8.70587	13.9556	3.07243	4.99944	1.98736	8.14436	3.7991	-1.30385	-0.382779	0.557666	0.808179
hsa-miR-6824-5p	3.01051	3.09613	1.65484	0.240613	2.54573	2.24745	2.22825	1.65432	0.25049	-1.33119	-0.412718	0.557697	0.808179
hsa-miR-4272	3.01051	3.72586	2.80603	2.80716	3.7747	2.56852	1.80669	2.79963	2.63014	-1.26823	-0.342821	0.5581	0.808203
hsa-miR-367-5p	2.66504	2.15155	1.00729	2.40613	6.05708	2.06399	1.38513	3.47832	1.75343	-1.29462	-0.37253	0.559432	0.809193
hsa-miR-4300	3.80015	4.19815	0.647544	0.240613	4.38919	7.43036	4.21561	0.89079	1.83693	1.3514	0.434452	0.559556	0.809193
hsa-miR-6769a-3p	1.52993	1.04954	1.25911	8.34126	0.877838	1.00906	1.20446	3.94493	7.97392	1.35951	0.44309	0.56161	0.810484
hsa-miR-4720-5p	5.03397	5.77245	21.1891	5.93513	3.68692	4.99944	4.4565	20.2761	14.5284	1.32551	0.406545	0.561331	0.810484
hsa-miR-4796-5p	0.246763	0.104954	1.22314	1.20307	0.351135	0.229332	0.120446	1.10288	0.292238	-1.4235	-0.509443	0.561003	0.810484
hsa-miR-8070	11.203	10.7578	25.4701	5.21329	9.744	23.4377	13.0684	14.7192	14.4032	1.30957	0.389098	0.562033	0.810535
hsa-miR-12115	9.377	5.71998	8.0943	4.41124	1.58011	6.6965	4.03494	5.09023	2.5049	-1.28242	-0.35887	0.564139	0.812528
hsa-miR-5008-3p	3.45468	2.9387	2.23043	2.16552	2.89687	3.99038	3.1316	1.06046	5.97001	1.29101	0.368496	0.564579	0.812528
hsa-miR-4689	3.7508	5.40512	3.30967	2.96756	0.790054	3.71518	4.87807	5.472	2.63014	1.27099	0.345956	0.564428	0.812528
hsa-miR-764	1.62864	1.04954	1.04327	2.16552	1.14119	2.93545	2.58959	0.466604	1.33595	1.30122	0.379865	0.565242	0.812718
hsa-miR-146b-3p	38.4457	36.5764	96.7	284.405	227.536	227.543	198.375	115.294	253.871	1.454	0.540025	0.565876	0.812718
hsa-miR-580-3p	3.55339	3.46347	1.69081	0.320818	2.63351	3.76105	2.52937	1.23014	4.75931	1.30936	0.388857	0.565622	0.812718
hsa-miR-4307	8.73542	7.60914	40.3276	186.475	60.922	4.72424	2.71004	44.4971	110.758	-1.49484	-0.57999	0.566531	0.812803
hsa-miR-513c-5p	1.77669	1.15449	0.827418	1.44368	1.66789	1.42186	0.903345	1.06046	0.667973	-1.31963	-0.400137	0.566711	0.812803
hsa-miR-8074	0.690937	0.83963	0.323772	2.80716	0.438919	1.00906	0.542007	0.212093	1.16895	-1.36593	-0.449885	0.568203	0.814385
hsa-miR-27a-5p	79.0136	100.126	61.3368	171.878	236.226	113.428	135.984	38.5585	86.085	-1.38683	-0.471792	0.569731	0.815464
hsa-miR-4789-5p	0.444174	0.577245	1.07924	2.40613	0.263351	0.550397	1.50558	0.0424186	0.667973	-1.38907	-0.474118	0.569734	0.815464
hsa-miR-4520-3p	2.17152	2.7288	2.33835	2.96756	10.7096	2.20159	2.16803	2.16335	6.26224	-1.2954	-0.373398	0.570298	0.815713
hsa-miR-4432	3.99756	5.14273	1.47496	0.320818	0.526703	0.64213	0.903345	1.48465	3.75735	-1.35669	-0.440092	0.572943	0.818025
hsa-miR-921	6.66261	4.93282	7.80651	10.4266	0.70227	3.34825	6.74498	7.16874	14.6119	1.30283	0.381654	0.572467	0.818025
hsa-miR-374a-3p	30.7467	29.387	10.1808	22.8583	57.3228	8.16422	16.3204	41.7399	25.4247	-1.3123	-0.392099	0.573086	0.818025
hsa-miR-4640-3p	2.17152	2.0466	1.36704	2.88736	5.09146	2.06399	1.68624	7.33841	2.88063	1.30409	0.383038	0.58229	0.819632
hsa-miR-122-3p	1.43123	1.46935	0.719494	0.160409	2.7213	1.33013	0.60223	1.65432	0.208741	-1.35993	-0.443534	0.58204	0.819632
hsa-miR-625-3p	9.72247	13.644	0	2.00511	2.37016	2.61439	4.57695	8.48371	15.4469	1.40056	0.486	0.578365	0.819632
hsa-miR-1243	2.66504	2.62384	1.40301	0.72184	2.54573	2.47679	2.10781	2.33302	3.13112	1.25893	0.332197	0.578979	0.819632
hsa-miR-12127	1.08576	1.73174	1.22314	2.00511	0.70227	3.34825	2.83048	0.424186	0.50098	1.30463	0.383639	0.575148	0.819632
hsa-miR-6782-5p	0.74029	1.10201	0.719494	3.76961	3.33578	1.33013	0.361338	2.07851	2.00392	-1.31179	-0.391536	0.583215	0.819632
hsa-miR-6815-5p	8.04448	11.6499	3.30967	4.33104	10.2707	15.3653	12.8275	5.21748	5.05154	1.27801	0.353904	0.578847	0.819632
hsa-miR-5586-5p	12.5849	12.0697	39.2124	32.7234	21.3315	26.3273	24.2699	12.4711	10.1866	-1.28871	-0.365932	0.580669	0.819632
hsa-miR-362-5p	38.7418	47.1242	2.33835	5.13308	4.38919	15.8239	20.1747	12.5135	8.76714	-1.36598	-0.449941	0.582536	0.819632
hsa-miR-6830-5p	3.60274	3.30604	12.5192	12.4317	0.526703	2.38505	3.37249	19.7246	9.22637	1.33821	0.420309	0.576963	0.819632
hsa-miR-5697	2.27022	1.67926	1.33106	9.46412	5.61816	1.55946	2.46914	3.39349	4.80105	-1.32051	-0.401098	0.580098	0.819632
hsa-miR-211-3p	1.67799	2.46641	1.47496	5.4539	4.21362	4.03625	4.09517	0.721116	0.375735	-1.32292	-0.403724	0.580855	0.819632
hsa-miR-1910-5p	9.72247	10.3379	2.23043	0.0802044	1.66789	9.81541	9.33457	2.16335	4.63406	1.34463	0.427205	0.58049	0.819632
hsa-miR-6832-3p	0.789642	0.524768	0.971317	2.88736	5.26703	0.871462	0.542007	2.54511	7.2642	1.35627	0.439648	0.580961	0.819632
hsa-miR-4671-5p	3.25727	3.46347	0.863392	4.57165	6.496	5.4581	4.33606	8.65339	0.584476	1.28049	0.356695	0.579021	0.819632
hsa-miR-6886-5p	3.6521	2.78127	17.9514	9.22351	12.7287	4.63251	5.66096	22.4394	15.5304	1.30205	0.380788	0.582144	0.819632
hsa-miR-325	11.055	10.6528	380.145	23.4999	8.95395	11.2373	14.2126	177.013	28.2218	-1.50632	-0.591029	0.583211	0.819632
hsa-miR-4264	34.7443	22.8274	3.48954	1.52388	5.4426	31.6478	25.8959	6.4052	10.4788	1.36587	0.449817	0.581884	0.819632
hsa-miR-5695	4.73785	3.88329	8.41808	13.2337	3.248	4.26558	3.6736	7.55051	5.71952	-1.26164	-0.335297	0.582117	0.819632
hsa-miR-3913-3p	0.542879	0.209907	0.575595	0.240613	0.263351	0.229332	0.662453	1.01805	0.208741	1.36248	0.446235	0.581053	0.819632
hsa-miR-4314	0.641584	1.78421	2.08653	3.6092	1.40454	1.55946	1.02379	2.2906	1.00196	-1.28242	-0.358874	0.576635	0.819632
hsa-miR-3915	2.02346	2.2565	2.5542	1.28327	1.22897	2.20159	2.22825	1.23014	0.25049	-1.28919	-0.366461	0.579864	0.819632
hsa-miR-302c-5p	0.493526	0.419815	1.43899	4.97268	0.175568	1.05493	0.782899	4.96297	1.33595	1.36178	0.445489	0.583127	0.819632
hsa-miR-27a-3p	36232	43396.8	11456.8	22255.5	29719.6	23438.7	31302.6	16604.5	16477.8	-1.30317	-0.382021	0.583658	0.819705
hsa-miR-6085	3.10922	4.25062	3.81332	8.66208	3.7747	3.21065	3.79405	3.35107	4.9263	-1.22374	-0.291299	0.585777	0.82213
hsa-miR-3622b-5p	1.67799	1.3644	3.95722	0.0802044	0.70227	1.97226	1.80669	0.59386	0.375735	-1.33515	-0.417001	0.586182	0.822147
hsa-miR-512-3p	2.8131	3.98824	0.899367	2.64675	0.526703	5.13704	4.33606	1.824	0.25049	1.32017	0.400725	0.587278	0.822582
hsa-miR-361-5p	123.924	142.002	54.2498	177.252	282.225	99.4384	140.079	103.332	105.957	-1.38931	-0.474374	0.587172	0.822582
hsa-miR-4418	2.51698	2.9387	2.01458	1.92491	0.614487	1.83466	2.89071	3.86009	1.83693	1.27625	0.35191	0.58781	0.822777
hsa-miR-548m	1.92475	1.99412	0.755468	4.65186	0.351135	1.05493	1.68624	1.18772	2.04567	-1.28978	-0.367125	0.588958	0.823283
hsa-miR-10392-5p	2.51698	2.57137	4.71268	0.882249	5.70595	7.84316	3.97472	3.39349	1.41944	1.26586	0.340114	0.588844	0.823283
hsa-miR-1181	2.56634	1.94164	9.49732	5.85492	8.25168	4.63251	1.80669	8.39888	3.04763	-1.25454	-0.327155	0.592125	0.827158
hsa-miR-4803	0.74029	0.524768	0.287797	0.160409	0.351135	0.321065	0.361338	1.65432	0	1.39091	0.476027	0.597379	0.827285
hsa-miR-892a	1.77669	1.46935	3.30967	2.64675	5.09146	1.65119	1.68624	2.71479	2.83888	-1.26585	-0.340108	0.598142	0.827285
hsa-miR-6750-5p	8.88347	8.50125	48.9615	36.1722	38.186	6.65063	4.81784	64.7732	7.72344	-1.3402	-0.422449	0.596713	0.827285
hsa-miR-4464	4.04692	3.93576	1.00729	5.13308	1.05341	4.26558	2.40892	1.1453	1.62818	-1.28545	-0.362268	0.593296	0.827285
hsa-miR-6850-3p	52.2644	53.5264	8.59795	10.988	10.7974	79.4865	41.1323	19.3429	11.3555	1.38812	0.473137	0.595502	0.827285
hsa-miR-6511a-3p	3.55339	5.09025	2.77005	2.32593	4.65254	4.12798	6.08253	3.648	4.09133	1.21552	0.281569	0.595939	0.827285
hsa-miR-345-5p	268.33	341.414	2.91395	4.89247	7.90054	166.449	172.72	164.839	253.997	1.51478	0.599106	0.595481	0.827285
hsa-miR-6068	1.43123	1.04954	224.23	2.16552	5.79373	1.10079	0.662453	94.8055	21.0411	-1.59645	-0.674865	0.597622	0.827285
hsa-miR-9-5p	7.00807	7.87153	12.2314	10.587	50.6513	12.1546	10.2981	10.944	21.1664	-1.29268	-0.370366	0.595716	0.827285
hsa-miR-496	49.55	64.0218	65.1142	102.742	72.8606	57.8376	81.7829	107.107	135.097	1.34807	0.430897	0.594698	0.827285
hsa-miR-6880-5p	11.1537	9.86565	18.3471	5.29349	5.09146	10.4575	7.04609	17.9855	15.0711	1.26467	0.338762	0.597747	0.827285
hsa-miR-3115	2.61569	3.14861	0.323772	2.16552	7.28606	2.38505	1.32491	2.12093	3.6321	-1.30151	-0.380186	0.595829	0.827285
hsa-miR-548s	12.6836	15.3232	5.684	12.1911	7.81276	12.4298	8.31078	10.6471	2.25441	-1.27724	-0.353024	0.596862	0.827285
hsa-miR-1229-5p	4.93526	5.35264	5.21633	3.529	4.30141	6.87996	4.09517	8.27162	4.00784	1.23883	0.308979	0.593769	0.827285
hsa-miR-544a	2.07281	2.46641	1.43899	0.0802044	1.31676	1.28426	1.50558	1.61191	0.0834966	-1.32824	-0.409519	0.59538	0.827285
hsa-miR-4474-3p	7.00807	6.50713	9.60524	6.57676	7.98833	8.53115	7.70855	14.9738	6.2205	1.23966	0.309949	0.599644	0.828815
hsa-miR-6126	3.94821	4.25062	7.69858	3.93002	8.51503	5.27464	6.62453	17.9006	0.166993	1.321	0.401636	0.600486	0.829432
hsa-miR-3670	1.13511	1.15449	7.59066	0.0802044	8.16389	0.504531	0.843122	13.5315	5.09329	1.37664	0.461148	0.602208	0.831261
hsa-miR-4436b-5p	0.888347	2.0466	33.9241	5.53411	2.37016	1.05493	1.62602	44.4122	3.38161	1.40749	0.493128	0.602942	0.831726
hsa-miR-624-3p	11.7459	11.44	8.56198	9.46412	9.65622	8.48529	18.7896	8.99274	14.6954	1.24822	0.319872	0.606114	0.833464
hsa-miR-7160-3p	3.35598	3.56843	3.23772	2.96756	4.21362	4.21971	2.83048	3.52074	0.292238	-1.27799	-0.353874	0.605845	0.833464
hsa-miR-1285-5p	1.33252	2.30898	0.971317	0.160409	0.70227	1.10079	1.26468	2.07851	1.33595	1.28839	0.365568	0.604633	0.833464
hsa-miR-425-5p	743.201	905.121	376.907	1232.34	959.214	701.435	1040.47	355.977	438.816	-1.32984	-0.411248	0.605151	0.833464
hsa-miR-3688-3p	3.40533	2.83375	1.54691	3.44879	2.01903	1.46773	1.98736	0.169674	4.63406	-1.28246	-0.358909	0.607018	0.833464
hsa-miR-4490	2.96116	2.67632	0.971317	0.0802044	2.10681	1.33013	1.26468	2.58753	0.208741	-1.30932	-0.388821	0.607386	0.833464
hsa-miR-3124-3p	1.33252	1.25944	3.2737	5.3737	1.75568	1.23839	1.26468	4.92055	0.626224	-1.28604	-0.362938	0.607229	0.833464
hsa-miR-609	3.50404	1.99412	132.675	0.160409	5.09146	4.44904	2.83048	159.748	11.1468	1.55217	0.634284	0.606827	0.833464
hsa-miR-10526-3p	2.46763	2.46641	0.647544	4.01022	0.263351	0.825596	1.08401	2.54511	1.62818	-1.29126	-0.368774	0.609841	0.835737
hsa-miR-4662a-5p	7.00807	7.34676	8.34613	0.962453	2.28238	2.06399	4.99851	12.5983	6.93022	1.2748	0.35027	0.609808	0.835737
hsa-miR-191-5p	2624.13	3059.35	2170.21	3088.35	3708.25	3102.73	3311.97	1387.13	1317.16	-1.28526	-0.362058	0.612655	0.839028
hsa-miR-4318	4.09627	3.77833	2.59018	2.40613	2.01903	2.75199	3.01115	4.96297	4.25833	1.24515	0.316325	0.614013	0.839028
hsa-miR-4323	1.08576	2.2565	7.33884	5.13308	3.7747	0.504531	2.28848	4.15702	5.21854	-1.28733	-0.364379	0.613583	0.839028
hsa-miR-6819-3p	33.1156	30.3316	240.994	24.9436	16.6789	27.9327	19.3316	310.165	31.854	1.40575	0.491336	0.615448	0.839028
hsa-miR-12129	1.67799	1.41687	0.575595	2.00511	2.1946	2.10986	1.62602	1.99367	1.79518	1.24371	0.314647	0.613285	0.839028
hsa-miR-202-3p	1.77669	1.62678	3.99319	8.90269	9.48065	2.61439	2.10781	6.23553	5.55252	-1.24013	-0.310489	0.614748	0.839028
hsa-miR-4268	1.03641	1.3644	3.20175	10.0256	3.95027	1.10079	3.79405	6.6173	8.26616	1.26819	0.342769	0.614838	0.839028
hsa-miR-4669	1.67799	1.46935	6.54739	0.320818	0.70227	2.38505	2.3487	0.254511	6.42924	1.31818	0.398549	0.615243	0.839028
hsa-miR-4648	0.641584	1.10201	0.791443	0.160409	3.16022	0.366931	0.240892	0.212093	2.58839	-1.35689	-0.440307	0.616223	0.839132
hsa-miR-4524a-5p	6.21843	4.09319	16.3685	21.3344	16.8545	5.7333	4.93829	19.8943	36.0288	1.28457	0.361284	0.616325	0.839132
hsa-miR-449b-3p	3.01051	3.14861	3.38162	2.08532	7.72498	1.83466	2.3487	2.71479	5.55252	-1.23234	-0.301399	0.6171	0.839641
hsa-miR-5002-5p	4.5898	2.9387	64.4666	10.6672	17.9957	3.48585	2.22825	39.1948	14.9041	-1.34667	-0.429394	0.618535	0.840185
hsa-miR-4691-3p	9.03153	9.70822	13.4186	2.96756	8.6906	18.7135	11.081	9.50176	4.80105	1.25321	0.325632	0.618719	0.840185
hsa-miR-6780a-3p	6.90937	7.60914	6.07972	7.53922	19.8391	10.3199	11.0208	13.4467	12.5245	1.24088	0.31136	0.619105	0.840185
hsa-miR-4531	12.042	9.49831	13.3466	4.41124	0.965622	7.84316	6.56431	20.5306	6.30399	1.27613	0.35177	0.618881	0.840185
hsa-miR-432-3p	10.3147	11.9122	118.141	6.81738	4.91589	20.7316	14.8149	119.578	15.7391	1.40326	0.488777	0.620215	0.840602
hsa-miR-374b-3p	21.8139	20.7808	4.89256	5.13308	14.5721	12.9802	16.8624	16.8402	21.1664	1.26144	0.335067	0.620127	0.840602
hsa-miR-3130-3p	0.987053	0.99706	0.503646	1.20307	0.70227	0.733863	1.5658	0.763534	1.41944	1.28421	0.360886	0.620876	0.840716
hsa-miR-505-3p	40.173	50.2728	4.38891	4.57165	1.14119	13.9434	13.2491	20.4033	12.9837	-1.32855	-0.409854	0.621102	0.840716
hsa-miR-1202	7.15613	6.92694	4.35294	0	8.95395	4.95357	4.15539	3.81767	4.30007	-1.27258	-0.347757	0.622209	0.84167
hsa-miR-369-3p	69.982	99.9684	2.6981	2.72695	1.05341	37.0601	71.9665	40.0431	51.4757	1.42034	0.506237	0.625234	0.841955
hsa-miR-455-5p	64.9974	73.3102	13.4186	19.8907	10.7096	42.243	73.8937	37.0738	44.2114	1.35254	0.435676	0.623266	0.841955
hsa-miR-1252-5p	2.51698	3.35852	3.2737	4.01022	8.25168	5.91677	4.51673	4.36911	5.97001	1.23217	0.301201	0.624932	0.841955
hsa-miR-769-5p	14.2629	16.0579	1.51094	0.320818	8.86616	13.0261	11.4424	6.57488	11.7313	1.30216	0.380904	0.623438	0.841955
hsa-miR-3164	0.690937	0.367338	2.94992	0.160409	2.54573	0.550397	0.662453	2.58753	0.208741	-1.34125	-0.423574	0.624311	0.841955
hsa-miR-8068	5.92232	3.72586	8.9577	3.36859	3.07243	2.29332	1.80669	5.85376	6.47099	-1.22445	-0.292137	0.624691	0.841955
hsa-miR-3136-5p	16.3851	21.463	13.0588	5.53411	7.46162	15.457	20.4156	13.7436	14.4867	1.24824	0.3199	0.625059	0.841955
hsa-miR-3912-3p	1.97411	2.62384	2.05056	5.4539	0.70227	2.06399	3.31227	1.1453	1.66993	-1.25421	-0.326775	0.626209	0.84218
hsa-miR-383-3p	1.18446	0.892106	1.61886	0.320818	2.54573	0.963195	1.20446	2.12093	2.25441	1.25398	0.326509	0.626005	0.84218
hsa-miR-4720-3p	0.9377	1.46935	1.04327	1.36348	0.263351	0.963195	0.782899	1.31498	0.0834966	-1.30564	-0.384758	0.626608	0.84218
hsa-miR-4282	178.903	297.124	1.72678	1.36348	4.12584	205.161	205.12	86.449	69.0934	1.46344	0.549362	0.632817	0.842958
hsa-miR-3609	3.40533	4.3031	3.2737	2.72695	2.45795	2.61439	3.73383	2.67237	1.71168	-1.23893	-0.309095	0.631271	0.842958
hsa-miR-8066	3.25727	3.46347	1.07924	3.28838	2.7213	3.62345	5.05873	0.212093	5.21854	1.27679	0.352519	0.632297	0.842958
hsa-miR-590-3p	96.9779	118.965	1.15119	4.49145	2.10681	14.4021	40.229	84.5826	118.44	1.43946	0.525528	0.632252	0.842958
hsa-miR-4681	4.49109	4.88035	3.23772	0.561431	0.0877838	1.88052	1.92714	4.15702	0.0417483	-1.33068	-0.412168	0.631327	0.842958
hsa-miR-512-5p	3.15857	3.72586	1.18716	1.68429	5.26703	1.69706	1.5658	1.61191	4.75931	-1.23642	-0.30617	0.627904	0.842958
hsa-miR-3123	4.5898	9.39336	1.90666	3.28838	2.28238	8.11836	4.33606	0.89079	0.0417483	-1.28493	-0.361694	0.631734	0.842958
hsa-miR-130a-5p	4.39238	3.09613	3.56149	3.44879	9.65622	1.97226	2.77026	8.52613	10.3118	1.22669	0.294771	0.632819	0.842958
hsa-miR-1225-3p	5.6262	6.50713	5.21633	4.73206	5.9693	6.51303	8.43122	6.44762	6.137	1.21128	0.276536	0.629834	0.842958
hsa-miR-3167	1.62864	1.62678	6.04375	2.72695	0.614487	1.65119	2.40892	2.79963	1.37769	-1.24434	-0.315386	0.632822	0.842958
hsa-miR-548au-3p	1.13511	1.15449	2.77005	0.160409	1.40454	1.00906	1.26468	0.89079	1.08546	-1.28114	-0.357425	0.628819	0.842958
hsa-miR-346	10.9563	11.8073	41.5508	8.42147	16.3278	7.56796	9.21412	60.1919	14.1109	1.2773	0.3531	0.628621	0.842958
hsa-miR-6763-3p	20.1359	17.3174	13.2747	24.6228	100.6	65.589	33.0624	36.183	51.3922	1.32436	0.405293	0.631127	0.842958
hsa-miR-1224-5p	2.07281	1.31192	2.4103	0.160409	0.526703	1.10079	1.5658	2.37544	1.66993	1.25759	0.330664	0.630297	0.842958
hsa-miR-10396a-3p	17.1747	17.5797	8.6699	5.05288	8.25168	3.66931	6.38364	20.4457	26.2597	1.24959	0.321452	0.634224	0.844288
hsa-miR-5584-5p	1.97411	1.52183	2.01458	2.16552	0.438919	1.28426	1.62602	2.20577	0.0834966	-1.25939	-0.332721	0.636292	0.846503
hsa-miR-4690-5p	6.51455	5.14273	3.63344	5.61431	2.80908	6.51303	7.52788	4.87814	4.09133	1.20311	0.266772	0.640083	0.847241
hsa-miR-96-3p	3.6521	1.41687	0.935342	0	0.526703	1.42186	1.44535	1.01805	0.0834966	-1.33135	-0.412887	0.64002	0.847241
hsa-miR-128-3p	200.125	246.484	73.8201	138.914	177.762	208.555	235.592	181.297	275.789	1.34582	0.428485	0.638398	0.847241
hsa-miR-4254	5.18203	4.9853	3.23772	4.65186	4.47697	3.66931	5.54052	7.33841	4.88455	1.19455	0.256471	0.639884	0.847241
hsa-miR-499a-5p	9.17959	9.65574	3.2737	12.2713	11.6752	7.88902	15.1762	10.8167	11.1468	1.22671	0.294792	0.637912	0.847241
hsa-miR-6802-3p	3.7508	1.20697	1.69081	0.160409	1.40454	1.74292	2.77026	2.16335	1.62818	1.24284	0.313635	0.639577	0.847241
hsa-miR-937-5p	1.52993	2.36146	2.51823	0.0802044	3.59914	1.92639	0.903345	2.20577	1.41944	-1.24902	-0.320793	0.639466	0.847241
hsa-miR-1301-3p	20.0865	21.2531	6.65532	7.69963	7.28606	12.7967	14.2729	7.0839	6.72148	-1.23603	-0.305712	0.63803	0.847241
hsa-miR-6733-3p	4.34303	4.61796	3.84929	3.84981	7.90054	4.63251	5.2394	9.20483	4.25833	1.19859	0.261344	0.643063	0.850647
hsa-miR-4695-3p	3.99756	3.35852	125.12	17.8856	4.91589	1.42186	3.1316	160.045	14.3197	1.43975	0.525816	0.644276	0.851713
hsa-miR-4793-5p	4.49109	5.71998	6.61934	3.6092	36.6058	7.20103	2.71004	11.7075	14.5702	-1.25787	-0.330982	0.644793	0.851859
hsa-miR-4730	9.52506	9.44583	23.8152	2.56654	2.54573	7.47623	4.15539	15.2707	3.6321	-1.25825	-0.331424	0.645534	0.852301
hsa-miR-153-5p	1.03641	0.83963	1.65484	2.48634	1.49232	0.779729	0.963568	0.636279	2.3379	-1.25455	-0.327169	0.647515	0.854312
hsa-miR-3199	1.82605	2.83375	2.77005	2.40613	1.93124	2.20159	1.74647	2.16335	5.30203	1.21142	0.276703	0.647874	0.854312
hsa-miR-1237-5p	2.27022	2.20403	0.395722	3.84981	2.63351	3.16478	2.71004	1.61191	3.54861	1.22886	0.297324	0.64933	0.855693
hsa-miR-3121-5p	1.8754	1.52183	2.33835	3.6894	6.05708	1.51359	1.20446	1.35739	5.80301	-1.23991	-0.310238	0.652279	0.858499
hsa-miR-6740-5p	2.66504	2.2565	4.10111	2.80716	2.37016	1.55946	1.26468	0.339349	6.01175	-1.23848	-0.308576	0.652236	0.858499
hsa-miR-10226	1.62864	1.46935	3.81332	2.40613	0.614487	3.48585	1.38513	1.06046	0.584476	-1.23315	-0.302352	0.654568	0.859616
hsa-miR-6752-3p	4.54044	3.83081	6.04375	7.69963	16.3278	6.32957	4.39628	12.4711	13.9857	1.21559	0.281659	0.655103	0.859616
hsa-miR-7152-3p	9.17959	11.23	9.85706	23.0187	24.4917	13.0261	7.88922	17.731	12.3992	-1.2132	-0.278815	0.653776	0.859616
hsa-miR-4481	0.690937	0.99706	0.0719494	0.481227	3.07243	0.963195	0.662453	1.18772	0.417483	-1.28896	-0.366202	0.654515	0.859616
hsa-miR-5189-3p	1.57928	2.30898	0.935342	1.8447	0.614487	1.05493	1.74647	0.254511	1.62818	-1.25681	-0.329764	0.656293	0.859616
hsa-miR-626	1.38187	2.09907	1.04327	0.160409	2.28238	1.23839	0.903345	2.46028	2.21266	1.22626	0.29426	0.656411	0.859616
hsa-miR-488-3p	3.89886	4.56549	5.32425	4.17063	6.05708	3.71518	3.43271	2.75721	6.0535	-1.19693	-0.259335	0.656073	0.859616
hsa-miR-450a-5p	88.736	96.6623	253.622	289.057	438.743	169.339	218.188	140.702	172.796	-1.3314	-0.41294	0.655183	0.859616
hsa-miR-602	7.25484	7.13685	0.143899	1.20307	4.38919	10.7786	5.4803	2.07851	1.87867	1.2535	0.325962	0.662647	0.860141
hsa-miR-6841-5p	0.542879	0.577245	0.395722	2.88736	2.63351	0.871462	0.120446	3.05414	0.166993	-1.31745	-0.397749	0.658656	0.860141
hsa-miR-4678	2.46763	4.46053	0.287797	3.6894	0.263351	3.76105	1.02379	1.99367	0.208741	-1.27901	-0.35503	0.659038	0.860141
hsa-miR-12114	6.07037	10.0756	3.92124	4.01022	2.63351	2.43092	3.9145	3.60558	8.01567	-1.19287	-0.254435	0.664617	0.860141
hsa-miR-4436a	1.8754	0.99706	2.30238	1.44368	0.351135	1.19253	0.722676	0.29693	4.8428	1.25433	0.326916	0.662737	0.860141
hsa-miR-5091	1.38187	0.99706	0.0719494	2.00511	0.351135	1.42186	0.722676	2.67237	0.166993	1.29976	0.378246	0.664141	0.860141
hsa-miR-4330	9.32765	4.82787	8.16625	14.9982	1.14119	4.31144	5.60074	11.0288	4.25833	-1.22144	-0.288582	0.664086	0.860141
hsa-miR-6831-3p	1.03641	1.10201	0.107924	0.240613	2.80908	0.412798	0.361338	2.03609	0.417483	-1.29248	-0.370141	0.664224	0.860141
hsa-miR-548v	4.44174	3.30604	3.56149	13.4743	1.05341	5.36637	6.38364	2.2906	2.75539	-1.23038	-0.299102	0.661577	0.860141
hsa-miR-1193	3.40533	4.04072	5.61205	0.401022	2.89687	3.34825	3.37249	6.74455	2.46315	1.20731	0.271797	0.660896	0.860141
hsa-miR-1343-5p	4.5898	2.99118	0.143899	5.4539	0.70227	2.29332	1.80669	2.54511	7.55644	1.27998	0.356124	0.658251	0.860141
hsa-miR-182-3p	3.01051	2.20403	11.9436	5.61431	8.16389	1.92639	2.46914	7.84743	18.4945	1.24192	0.312567	0.664216	0.860141
hsa-miR-520d-5p	0.9377	1.04954	1.47496	0.320818	3.248	0.779729	0.843122	1.48465	1.2942	-1.25752	-0.330577	0.661312	0.860141
hsa-miR-5591-3p	1.33252	1.88917	0.863392	0.802044	1.31676	1.69706	2.04758	1.78158	0.584476	1.21547	0.281511	0.661026	0.860141
hsa-miR-5704	1.43123	1.04954	2.48225	0.240613	4.30141	1.42186	0.662453	3.39349	0.542728	-1.25708	-0.330073	0.66432	0.860141
hsa-miR-6842-3p	4.6885	6.97942	9.46134	35.3702	28.003	26.2356	16.4409	2.88446	8.89239	-1.24019	-0.310566	0.662681	0.860141
hsa-miR-297	3.40533	1.73174	114.867	12.5119	8.95395	3.48585	2.64981	50.9871	26.6772	-1.35097	-0.434	0.659082	0.860141
hsa-miR-3685	3.45468	2.88623	1.47496	5.3737	2.37016	1.23839	2.22825	2.37544	4.34182	-1.21133	-0.276597	0.661138	0.860141
hsa-miR-552-5p	1.38187	0.682199	1.18716	0	0.965622	2.66025	1.32491	0.339349	0.166993	1.30978	0.389328	0.658498	0.860141
hsa-miR-548ac	3.05986	2.88623	1.18716	3.28838	2.37016	1.60532	1.32491	3.52074	1.96217	-1.19918	-0.262047	0.667437	0.860355
hsa-miR-5007-5p	1.92475	1.99412	1.54691	0.401022	0.263351	1.92639	1.5658	0.721116	1.96217	1.22251	0.289842	0.665438	0.860355
hsa-miR-520g-5p	8.09383	9.23592	10.2528	4.65186	3.07243	5.64157	18.1874	10.3077	0.918463	1.23614	0.305842	0.665626	0.860355
hsa-miR-4785	1.52993	1.57431	1.51094	0.320818	0.526703	1.60532	0.60223	0.29693	1.04371	-1.26131	-0.334926	0.66723	0.860355
hsa-miR-7160-5p	3.94821	3.14861	3.09382	1.36348	3.68692	1.97226	2.64981	4.19944	1.37769	-1.20176	-0.265147	0.667659	0.860355
hsa-miR-3944-3p	2.91181	2.15155	2.33835	2.40613	0.790054	2.47679	2.52937	1.69674	3.75735	1.21131	0.276573	0.666134	0.860355
hsa-miR-6810-5p	1.52993	1.52183	2.33835	0	1.58011	3.30238	3.25204	0.424186	0.25049	1.28214	0.358549	0.666886	0.860355
hsa-miR-10a-3p	53.9424	34.2674	37.8454	96.5661	83.0435	111.364	111.714	49.7994	39.1182	1.27639	0.352071	0.668348	0.860713
hsa-miR-1909-3p	4.49109	2.46641	14.174	0.72184	1.05341	3.53171	2.16803	13.7012	3.6321	1.25055	0.322566	0.670048	0.861992
hsa-miR-3689a-5p	1.18446	1.25944	0.827418	0	0.877838	0.825596	0.722676	1.01805	0.0834966	-1.27161	-0.346655	0.670164	0.861992
hsa-miR-548an	0.789642	0.99706	2.26641	0.561431	1.84346	0.779729	0.963568	2.12093	0.292238	-1.25065	-0.322677	0.670991	0.861997
hsa-miR-550b-3p	2.27022	0.577245	1.22314	0.0802044	1.14119	0.458664	0.240892	2.33302	0.25049	-1.29376	-0.371566	0.670706	0.861997
hsa-miR-296-3p	16.7799	36.5764	5.32425	8.42147	8.77838	6.8341	12.3457	21.5062	8.97588	-1.22321	-0.290677	0.671706	0.86227
hsa-miR-3927-3p	76.1018	97.8168	103.859	249.035	37.3081	76.3217	108.341	96.6295	72.7255	-1.27474	-0.350199	0.676355	0.86227
hsa-miR-520g-3p	5.72491	5.71998	3.70539	17.3242	8.16389	8.89809	13.0684	6.91423	10.0196	1.20177	0.265163	0.675639	0.86227
hsa-miR-6513-3p	5.82361	4.61796	6.79922	5.3737	3.16022	7.1093	5.35985	3.4359	1.71168	-1.17954	-0.238224	0.674214	0.86227
hsa-miR-1976	2.02346	1.78421	6.94311	0.320818	5.09146	2.06399	2.04758	4.7933	1.58644	-1.23575	-0.305392	0.676556	0.86227
hsa-miR-4486	2.22087	3.14861	3.09382	2.40613	1.22897	3.16478	1.92714	1.86642	4.75931	1.19728	0.259763	0.676432	0.86227
hsa-miR-26b-3p	5.42879	5.71998	25.3622	46.8394	19.3124	9.72368	9.03345	67.0213	16.5741	1.24684	0.318271	0.674113	0.86227
hsa-miR-302a-5p	2.22087	3.6209	1.72678	0	2.01903	1.14666	1.14424	0.551441	6.88847	1.26416	0.338177	0.676272	0.86227
hsa-miR-3134	4.34303	6.71704	6.83519	0.641636	9.04173	17.0164	6.32342	2.03609	2.08741	1.24311	0.31395	0.673012	0.86227
hsa-miR-3926	2.61569	2.51889	1.58289	7.53922	3.51135	1.78879	2.40892	5.72651	1.62818	-1.21931	-0.286061	0.673538	0.86227
hsa-miR-19a-3p	98.4585	123.268	21.0452	75.0714	83.658	105.08	193.858	55.1866	60.3263	1.29019	0.367589	0.672848	0.86227
hsa-miR-6802-5p	5.82361	8.6062	1.58289	2.48634	0.790054	4.03625	4.21561	1.73916	2.63014	-1.22971	-0.298312	0.67242	0.86227
hsa-miR-518a-5p	6.07037	8.13391	4.38891	2.00511	4.65254	10.0906	3.73383	1.69674	1.33595	-1.20173	-0.265115	0.675168	0.86227
hsa-miR-4731-3p	29.4142	23.6146	0.647544	0.320818	0.263351	34.7209	22.6439	1.90884	0.125245	1.36709	0.451111	0.677514	0.862965
hsa-miR-6814-3p	0.74029	0.472292	0.575595	2.16552	0.0877838	0.825596	0.301115	0.169674	1.2107	-1.27367	-0.348989	0.677988	0.863044
hsa-miR-3200-3p	4.24433	5.51007	4.13709	8.90269	1.58011	9.54022	1.74647	2.33302	2.58839	-1.20222	-0.265695	0.679017	0.863443
hsa-miR-1245a	4.14562	3.51595	2.5542	0.0802044	0.438919	2.93545	2.89071	2.84204	2.08741	1.23777	0.307738	0.679539	0.863443
hsa-miR-6784-5p	36.8664	32.6931	11.44	5.21329	7.81276	12.3839	12.7071	35.7164	31.4365	1.22515	0.292958	0.679431	0.863443
hsa-miR-1911-5p	0.641584	0.577245	0.0719494	4.25084	0.351135	0.596264	0.361338	0.212093	2.4214	-1.2974	-0.375622	0.680941	0.8647
hsa-miR-190a-3p	1.28317	1.20697	3.23772	0	0.0877838	1.05493	0.542007	0.89079	1.2107	-1.27913	-0.355167	0.68137	0.864721
hsa-miR-6515-3p	0.690937	1.10201	0.683519	5.69452	3.51135	1.14666	1.32491	1.35739	3.6321	-1.23573	-0.305358	0.682023	0.865025
hsa-miR-548at-5p	2.46763	2.36146	0.863392	1.44368	1.58011	1.78879	1.44535	3.05414	1.92042	1.18273	0.242116	0.683426	0.866229
hsa-miR-23a-5p	7.64966	9.55079	24.139	10.988	8.60281	9.63195	10.4788	29.693	8.93414	1.20269	0.266261	0.6838	0.866229
hsa-miR-619-5p	5.5275	3.88329	1.79873	8.50167	6.14487	3.66931	3.31227	1.10288	8.97588	-1.20704	-0.271475	0.684723	0.86635
hsa-miR-555	3.15857	3.41099	892.496	8.26106	4.47697	2.06399	3.25204	1047.4	33.4821	1.48899	0.574335	0.684485	0.86635
hsa-miR-3121-3p	2.22087	1.57431	2.66213	3.6092	4.21362	2.98132	1.80669	2.37544	2.17091	-1.19116	-0.252366	0.685962	0.866369
hsa-miR-6825-3p	1.23382	1.52183	3.63344	1.60409	1.40454	1.60532	1.38513	2.5027	0.960211	-1.18531	-0.245262	0.686851	0.866369
hsa-miR-6758-3p	0.9377	0.944583	0.971317	1.12286	0.175568	1.05493	1.38513	0.339349	1.46119	1.2373	0.307193	0.687634	0.866369
hsa-miR-3192-5p	2.31957	1.99412	2.62615	5.13308	4.74033	2.29332	1.98736	3.69042	3.13112	-1.18395	-0.243612	0.687168	0.866369
hsa-miR-4635	5.18203	4.61796	29.2114	2.40613	1.66789	2.93545	3.01115	36.183	1.75343	1.27066	0.345575	0.68723	0.866369
hsa-miR-3171	1.28317	1.67926	0.395722	0.240613	4.30141	1.14666	1.38513	1.52707	0.960211	-1.24467	-0.315761	0.686728	0.866369
hsa-miR-7848-3p	4.24433	4.19815	1.04327	4.17063	0.526703	1.78879	2.3487	5.13265	4.55056	1.2167	0.282969	0.685512	0.866369
hsa-miR-1272	4.34303	4.51301	1.07924	8.02044	5.9693	3.30238	3.31227	5.30232	4.30007	-1.16991	-0.226391	0.69186	0.867518
hsa-miR-665	29.6609	35.8417	10.5046	15.319	24.8428	22.6121	31.7978	29.693	27.9714	1.20568	0.269843	0.690063	0.867518
hsa-miR-558	0.9377	0.682199	0.719494	1.8447	0.438919	0.733863	0.722676	1.39981	0.125245	-1.23248	-0.301566	0.691804	0.867518
hsa-miR-1273c	1.72734	1.41687	0.107924	2.80716	0.0877838	1.97226	1.38513	0.29693	0.166993	-1.2892	-0.366473	0.689517	0.867518
hsa-miR-6815-3p	5.47814	4.82787	2.05056	8.58188	11.0608	5.5957	3.9145	5.30232	6.67973	-1.17996	-0.238739	0.689554	0.867518
hsa-miR-4723-5p	3.6521	2.83375	4.10111	12.6723	5.70595	4.86184	1.98736	5.64167	7.01371	-1.17933	-0.237967	0.691709	0.867518
hsa-miR-3151-5p	1.33252	1.31192	0.791443	4.09043	1.14119	1.69706	1.5658	1.01805	4.00784	1.2114	0.276676	0.691851	0.867518
hsa-miR-6888-3p	6.16908	5.19521	6.00777	2.56654	5.88152	3.62345	2.52937	6.70213	11.6895	1.18754	0.247981	0.691738	0.867518
hsa-miR-7704	4.63915	4.51301	12.9869	17.5648	9.65622	9.67782	8.43122	21.379	7.68169	1.19643	0.258736	0.692614	0.867944
hsa-miR-216b-5p	3.80015	4.14567	1.25911	0.0802044	1.66789	2.47679	2.3487	0.89079	1.50294	-1.22328	-0.290753	0.694422	0.868969
hsa-miR-5682	1547.9	2074.78	799.394	1336.53	1637.52	1230.92	1802.23	946.867	836.552	-1.22846	-0.296846	0.693915	0.868969
hsa-miR-137-3p	110.204	124.003	1.29509	0.802044	3.33578	30.0425	42.8186	30.6686	39.5774	-1.33987	-0.422095	0.694677	0.868969
hsa-miR-4788	3.05986	1.94164	0.0719494	0.160409	0.790054	1.14666	1.5658	1.56949	1.71168	1.23251	0.3016	0.696821	0.87113
hsa-miR-6749-5p	4.19497	2.41393	2.66213	2.64675	8.33946	5.04531	2.3487	3.73283	7.89043	1.18417	0.243875	0.699489	0.872902
hsa-miR-4252	1.92475	2.0466	2.08653	0.160409	4.65254	1.78879	2.04758	3.30865	3.29812	1.20489	0.268897	0.699143	0.872902
hsa-miR-7976	2.22087	1.83669	2.6981	3.44879	2.54573	1.74292	2.52937	3.39349	1.00196	-1.17367	-0.231032	0.698912	0.872902
hsa-miR-510-5p	2.31957	2.30898	1.22314	4.09043	0.0877838	1.37599	2.04758	0.212093	2.88063	-1.23329	-0.302517	0.700108	0.873154
hsa-miR-548e-5p	3.01051	3.98824	1.15119	2.72695	0.614487	1.14666	1.86691	2.62995	2.08741	-1.19421	-0.256059	0.702485	0.873528
hsa-miR-7844-5p	3.20792	3.41099	1.51094	1.92491	2.7213	1.23839	2.28848	2.67237	2.46315	-1.17727	-0.235444	0.701779	0.873528
hsa-miR-4433b-3p	2.56634	2.67632	6.29557	2.48634	1.66789	1.88052	1.80669	6.36279	0.375735	-1.2098	-0.27477	0.701528	0.873528
hsa-miR-6776-5p	2.56634	3.04366	2.73408	4.65186	1.22897	3.07305	3.73383	4.07218	2.67189	1.18661	0.246849	0.701694	0.873528
hsa-miR-6875-3p	3.20792	3.04366	6.47544	0.0802044	6.93492	1.97226	1.32491	4.7933	4.9263	-1.21325	-0.278872	0.702493	0.873528
hsa-miR-6514-5p	2.02346	3.35852	0.143899	0.481227	3.248	1.65119	2.40892	2.79963	2.04567	1.20525	0.269334	0.703426	0.874169
hsa-miR-2276-3p	1.77669	2.36146	1.76276	0.240613	0.351135	1.05493	1.5658	0.127256	3.67385	1.2195	0.286291	0.707137	0.878259
hsa-miR-1179	0.987053	0.944583	0.935342	0.882249	0.351135	1.46773	0.722676	0.381767	0.208741	-1.21162	-0.276933	0.708706	0.87881
hsa-miR-10396b-5p	4.14562	5.35264	3.56149	4.65186	15.1866	5.27464	5.72119	4.45395	15.4886	1.18154	0.240671	0.70884	0.87881
hsa-miR-3138	0.838995	0.524768	0.827418	0.401022	3.16022	0.550397	1.20446	1.1453	2.63014	1.22404	0.291654	0.708247	0.87881
hsa-miR-4717-5p	2.56634	3.09613	5.18035	0.320818	4.47697	1.42186	4.09517	5.17507	4.34182	1.19602	0.258236	0.709431	0.878851
hsa-miR-486-3p	3.10922	3.51595	2.80603	8.26106	9.04173	6.51303	3.85427	3.52074	4.09133	-1.17666	-0.234692	0.709712	0.878851
hsa-miR-1264	6.90937	5.61502	8.45405	36.1722	1.66789	8.25596	24.6312	8.61097	15.4051	1.20963	0.274566	0.711064	0.879069
hsa-miR-942-3p	13.7694	11.335	6.65532	3.6092	2.80908	10.2741	6.56431	7.25358	11.8983	1.17315	0.230393	0.710601	0.879069
hsa-miR-3919	1.92475	1.31192	4.10111	7.69963	7.46162	6.2837	2.83048	5.72651	6.17875	1.17702	0.235134	0.711148	0.879069
hsa-miR-4469	4.54044	6.13979	12.0515	5.69452	10.8852	5.54984	11.2617	11.7075	8.22441	1.16651	0.222199	0.712217	0.879871
hsa-miR-3194-5p	3.99756	4.25062	2.4103	4.57165	2.89687	1.60532	2.77026	5.51441	2.54665	-1.16104	-0.215413	0.7136	0.881061
hsa-miR-412-3p	1.82605	1.25944	1.87068	0.160409	1.58011	1.14666	0.542007	3.05414	1.66993	1.18774	0.248224	0.715602	0.88195
hsa-miR-4525	3.55339	3.6209	0.287797	3.20818	2.98465	2.93545	2.95093	2.54511	0.667973	-1.19887	-0.261673	0.715916	0.88195
hsa-miR-3190-3p	3.20792	3.72586	7.01506	9.54433	2.54573	4.26558	3.37249	5.13265	5.21854	-1.1563	-0.209513	0.715683	0.88195
hsa-miR-6765-5p	2.31957	2.51889	1.47496	2.80716	4.03806	2.20159	2.04758	2.88446	1.66993	-1.16096	-0.215315	0.716005	0.88195
hsa-miR-553	3.80015	2.30898	40.9392	6.89758	3.68692	4.17384	6.68476	31.6443	13.9857	1.22314	0.290593	0.7173	0.883025
hsa-miR-4639-3p	0.987053	0.524768	1.43899	0.0802044	1.14119	0.504531	0.722676	0.339349	2.58839	1.23014	0.298823	0.718009	0.883379
hsa-miR-660-5p	167.207	166.509	2.12251	0.0802044	2.89687	49.6275	72.3279	42.2913	39.6609	-1.32944	-0.410821	0.718763	0.883706
hsa-miR-1286	125.158	168.241	3108.11	8992.28	2881.06	266.438	188.137	2236.65	6857.78	-1.2797	-0.355803	0.719119	0.883706
hsa-miR-6768-5p	6.86002	8.92106	5.50413	18.046	5.70595	3.66931	7.64832	12.8528	6.80497	-1.16021	-0.214385	0.721928	0.885599
hsa-miR-93-3p	4.98462	4.51301	5.14438	11.389	5.88152	6.19197	8.49145	2.5027	4.75931	-1.1618	-0.216365	0.721729	0.885599
hsa-miR-9901	4.63915	4.04072	5.93582	3.6894	2.89687	4.49491	2.89071	3.648	3.92434	-1.15605	-0.2092	0.721495	0.885599
hsa-miR-598-3p	15.9903	15.953	0.0359747	0	1.58011	4.44904	7.5881	8.39888	13.6517	1.26809	0.34266	0.723323	0.886159
hsa-miR-3160-3p	2.96116	3.46347	3.2737	9.0631	5.00368	3.62345	3.37249	5.59925	9.05938	1.14992	0.201531	0.723772	0.886159
hsa-miR-10401-5p	1.72734	2.2565	3.77734	3.84981	0.790054	3.11892	2.04758	0.424186	2.83888	-1.18298	-0.242426	0.724078	0.886159
hsa-miR-4691-5p	1.82605	2.30898	4.49684	7.1382	8.77838	2.56852	1.50558	5.30232	7.3477	-1.16577	-0.221285	0.723928	0.886159
hsa-miR-1178-5p	1.43123	1.20697	1.97861	2.40613	2.54573	1.23839	1.62602	2.58753	3.21462	1.15749	0.211004	0.725215	0.887033
hsa-miR-5694	3.7508	1.78421	2.30238	0.641636	2.45795	1.60532	1.92714	5.13265	1.66993	1.1741	0.231552	0.728123	0.88748
hsa-miR-6500-3p	3.45468	3.25356	3.48954	6.97779	13.0798	5.5957	2.64981	6.95665	5.59427	-1.15308	-0.205488	0.72686	0.88748
hsa-miR-4707-5p	520.868	492.6	301.324	654.308	2647.03	1982.44	1181.52	628.601	710.097	1.21931	0.286061	0.727888	0.88748
hsa-miR-6804-3p	1.18446	1.67926	0.107924	0.481227	2.28238	1.00906	0.662453	3.73283	0.208741	1.23045	0.299184	0.727759	0.88748
hsa-miR-12131	1.92475	2.78127	2.9859	0.72184	6.84714	5.96264	2.16803	1.78158	4.30007	1.16911	0.225413	0.727783	0.88748
hsa-miR-887-5p	7.99513	8.44877	1.69081	11.8703	3.7747	14.3562	5.90186	5.42958	5.80301	1.16685	0.222622	0.726607	0.88748
hsa-miR-4729	0.789642	0.83963	0.719494	2.40613	3.7747	0.275199	2.10781	1.78158	1.46119	-1.19602	-0.258236	0.729831	0.888526
hsa-miR-1255a	4.93526	3.83081	3.56149	3.529	7.63719	5.77917	4.03494	7.7626	3.6321	1.13961	0.188543	0.729757	0.888526
hsa-miR-208a-5p	93.5726	86.2719	130.156	823.7	106.833	26.098	75.4595	252.73	424.163	-1.27479	-0.350259	0.731265	0.889756
hsa-miR-3157-5p	60.5063	63.392	5.03646	3.6092	1.75568	32.9321	38.2416	34.5711	27.5956	1.24037	0.310771	0.732025	0.890163
hsa-miR-5689	0.641584	0.577245	2.73408	0.72184	0.526703	0.779729	0.782899	0.127256	1.79518	-1.21663	-0.282896	0.733159	0.891024
hsa-miR-3059-3p	1.77669	1.73174	0.719494	0.641636	2.37016	0.779729	1.02379	0.89079	2.12916	-1.1852	-0.245129	0.734311	0.891906
hsa-miR-3929	3.20792	4.14567	3.70539	3.6894	0.877838	1.92639	2.83048	2.79963	3.29812	-1.16636	-0.22201	0.736023	0.891917
hsa-miR-3200-5p	3.50404	3.51595	0.431696	0.0802044	3.86249	3.11892	2.83048	4.7933	0.25049	1.20469	0.268657	0.735313	0.891917
hsa-miR-4513	1.03641	0.83963	1.51094	0.160409	0.526703	0.412798	0.60223	0.169674	1.58644	-1.20476	-0.26874	0.735873	0.891917
hsa-miR-3188	1.18446	1.88917	1.83471	0	0.70227	1.55946	0.421561	1.65432	0.0417483	-1.23178	-0.300749	0.734963	0.891917
hsa-miR-3606-3p	123.974	213.004	15.5411	39.3002	33.1823	116.271	111.834	29.3961	18.7032	-1.2312	-0.30007	0.740245	0.892546
hsa-miR-8084	1.67799	1.15449	0.0359747	6.09554	4.12584	0.596264	1.14424	3.47832	3.42336	-1.20371	-0.267494	0.741671	0.892546
hsa-miR-5000-5p	3.05986	3.98824	0.179873	4.01022	1.14119	2.06399	4.09517	1.824	3.6321	1.17226	0.22929	0.736998	0.892546
hsa-miR-4495	0.74029	0.682199	1.87068	0	0.0877838	0.458664	0.903345	0.169674	1.87867	1.22228	0.289571	0.742693	0.892546
hsa-miR-4704-3p	1.23382	0.629722	0.107924	0.240613	0.965622	1.60532	1.32491	0.127256	0.0834966	1.22539	0.293241	0.741778	0.892546
hsa-miR-6884-3p	0.444174	0.629722	0.251823	1.8447	0.438919	0.733863	0.542007	0.805953	0.25049	-1.199	-0.261828	0.742936	0.892546
hsa-miR-7112-5p	1.57928	1.73174	1.94263	1.20307	8.6906	2.88958	1.62602	2.88446	2.88063	-1.16465	-0.219896	0.737817	0.892546
hsa-miR-3664-3p	6.07037	8.6062	12.3393	7.53922	17.7323	6.32957	5.42007	28.887	8.01567	1.1647	0.219959	0.741049	0.892546
hsa-miR-6886-3p	0.789642	1.10201	5.46815	0	2.54573	1.46773	0.963568	0.848371	3.33986	-1.20286	-0.266467	0.738048	0.892546
hsa-miR-505-5p	17.3721	24.1918	6.22362	0.320818	8.51503	15.9615	19.8736	11.1561	7.01371	1.19052	0.251596	0.739485	0.892546
hsa-miR-6894-5p	8.04448	8.97354	9.92901	14.7576	0.614487	6.46717	5.96208	16.3311	10.8963	1.17043	0.227043	0.741535	0.892546
hsa-miR-4757-5p	3.80015	4.46053	5.8279	4.25084	12.3775	4.90771	4.39628	7.50809	11.272	1.15028	0.20199	0.740894	0.892546
hsa-miR-6756-5p	1.62864	1.67926	2.91395	2.80716	5.53038	2.52265	1.68624	3.648	2.08741	-1.15091	-0.20277	0.742437	0.892546
hsa-miR-1233-5p	3.94821	2.88623	3.30967	8.66208	5.53038	3.62345	3.73383	6.53246	8.09917	1.14167	0.191144	0.741808	0.892546
hsa-miR-5010-3p	14.411	11.2825	4.92853	7.05799	0.965622	8.30182	6.32342	9.5866	11.8983	1.16531	0.220719	0.738625	0.892546
hsa-miR-5684	11.4005	10.233	18.0593	22.7781	11.4119	6.37543	9.33457	20.4882	32.3967	1.16133	0.215781	0.749428	0.892905
hsa-miR-3940-3p	4.78721	9.34088	6.1157	6.89758	2.7213	4.08211	3.97472	10.4774	2.29616	-1.14873	-0.200041	0.749519	0.892905
hsa-miR-130a-3p	176.14	223.761	183.975	472.805	276.519	209.334	293.045	158.688	211.288	-1.22244	-0.289769	0.747513	0.892905
hsa-miR-142-5p	2.07281	2.41393	1.76276	4.89247	5.17924	1.97226	2.52937	3.47832	3.13112	-1.14988	-0.201487	0.743999	0.892905
hsa-miR-7151-5p	0.789642	1.20697	0.61157	0.0802044	3.42357	0.733863	0.301115	3.01172	1.79518	1.20752	0.272045	0.744949	0.892905
hsa-miR-3065-5p	1.33252	1.31192	1.07924	2.24572	0.175568	0.825596	1.68624	1.78158	1.50294	1.17014	0.226683	0.749247	0.892905
hsa-miR-6760-3p	2.71439	2.51889	6.61934	6.33615	7.72498	3.53171	5.78141	5.51441	8.72539	1.14147	0.190892	0.747377	0.892905
hsa-miR-1281	3.50404	1.88917	7.15896	16.1211	12.2019	3.57758	4.81784	11.962	17.5343	1.16204	0.216655	0.746178	0.892905
hsa-miR-3660	1.92475	0.734676	3.1298	4.81227	0.614487	2.38505	1.86691	2.07851	1.37769	-1.16552	-0.220976	0.748034	0.892905
hsa-miR-1913	10.0186	10.8627	30.5065	59.5919	39.9416	6.10023	10.1175	24.1786	61.5787	-1.1832	-0.242688	0.746297	0.892905
hsa-miR-3126-5p	3.15857	2.99118	155.626	9.46412	2.80908	3.94451	3.43271	92.218	9.22637	-1.27988	-0.356013	0.749631	0.892905
hsa-miR-659-5p	1.38187	1.25944	1.69081	1.44368	0.70227	1.00906	0.963568	1.31498	2.75539	1.15266	0.204972	0.744959	0.892905
hsa-miR-4320	2.61569	2.09907	2.87797	2.08532	4.21362	1.42186	3.07137	3.26623	1.96217	-1.139	-0.187766	0.745995	0.892905
hsa-miR-3618	0.493526	0.419815	0.215848	0.320818	0.0877838	0.183466	0.180669	0.0424186	1.1272	1.2264	0.294429	0.744381	0.892905
hsa-miR-4443	10.0186	23.0898	1.43899	6.25595	2.7213	9.99888	13.6706	5.09023	0.292238	-1.20018	-0.263255	0.747141	0.892905
hsa-miR-151a-5p	6171.7	6639.74	2120.31	3487.05	4759.2	6595.5	8445.74	3798.54	2961	1.17572	0.233547	0.75043	0.893349
hsa-miR-4517	2.46763	1.94164	1.87068	0.160409	4.82811	1.92639	0.903345	3.60558	1.2107	-1.17358	-0.230912	0.752004	0.894206
hsa-miR-3918	2.76375	4.04072	2.26641	0.72184	2.45795	4.40318	2.52937	3.05414	1.37769	1.14915	0.200567	0.751631	0.894206
hsa-miR-4797-5p	1.62864	1.83669	2.66213	0	1.93124	1.46773	2.28848	2.20577	1.62818	1.16146	0.215937	0.753417	0.89487
hsa-miR-628-3p	13.72	15.1133	0.395722	3.529	2.80908	7.79729	8.43122	3.86009	13.443	1.17674	0.234797	0.753122	0.89487
hsa-miR-6134	13.1278	11.44	19.0306	40.1824	13.2554	15.1359	16.4409	24.73	10.5623	-1.1596	-0.213627	0.75388	0.894912
hsa-miR-4259	8.3406	9.49831	21.297	7.05799	3.7747	18.8052	6.8052	6.02344	2.96413	-1.15888	-0.212737	0.754495	0.895135
hsa-miR-637	1.67799	1.83669	0.179873	0.641636	2.10681	1.60532	1.26468	1.65432	1.41944	1.16435	0.219525	0.754963	0.895182
hsa-miR-10393-3p	1.8754	1.78421	0.755468	1.44368	1.66789	4.12798	0.722676	0.127256	0.0834966	-1.18979	-0.250703	0.75589	0.895774
hsa-miR-217-3p	13.6707	12.6994	21.4409	4.57165	12.0264	7.29276	22.5234	22.1001	7.68169	1.15329	0.20576	0.757308	0.896947
hsa-miR-3177-5p	0.493526	0.892106	0.971317	0.160409	0.0877838	0.550397	0.421561	0.127256	1.50294	1.20071	0.263889	0.758132	0.897416
hsa-miR-548p	1.43123	1.20697	0.251823	1.44368	0.175568	0.458664	1.38513	1.06046	0.166993	-1.18715	-0.247504	0.759203	0.898175
hsa-miR-597-3p	1.92475	1.41687	2.6981	0.240613	1.05341	2.29332	1.20446	1.31498	0.375735	-1.15291	-0.205277	0.759711	0.898269
hsa-miR-7155-5p	2.17152	2.83375	1.36704	3.84981	4.38919	2.88958	2.40892	3.01172	1.79518	-1.13078	-0.177312	0.760408	0.898318
hsa-miR-4713-3p	10.216	6.76951	120.587	9.30372	13.1676	24.5385	23.6074	40.0855	17.5343	-1.21147	-0.276761	0.76061	0.898318
hsa-miR-4422	12.8317	12.0172	100.513	10.6672	11.6752	11.9711	12.7071	50.3084	23.7548	-1.19757	-0.260105	0.763316	0.89878
hsa-miR-6753-5p	1.77669	1.25944	17.8434	4.01022	0.790054	2.56852	7.34721	5.85376	1.79518	-1.17541	-0.233168	0.762047	0.89878
hsa-miR-342-3p	219.274	304.838	252.686	723.845	917.253	481.873	551.161	338.034	242.725	-1.19853	-0.26126	0.76352	0.89878
hsa-miR-4758-3p	2.56634	1.88917	1.11522	0.0802044	1.84346	1.69706	1.20446	1.90884	0.375735	-1.16331	-0.218235	0.764006	0.89878
hsa-miR-492	7.00807	8.50125	4.96451	1.36348	4.30141	5.8709	4.75762	4.87814	3.04763	-1.13431	-0.18182	0.762374	0.89878
hsa-miR-6789-5p	2.61569	3.46347	2.9859	2.40613	2.10681	2.33919	1.74647	7.38083	1.1272	1.15668	0.209987	0.761747	0.89878
hsa-miR-520a-5p	1.23382	1.20697	2.94992	0.240613	1.93124	1.37599	0.60223	1.35739	3.75735	1.16414	0.219261	0.763842	0.89878
hsa-miR-3150b-3p	2.12216	2.30898	0.0719494	4.73206	2.01903	0.963195	3.37249	5.04781	1.1272	1.17117	0.227954	0.768494	0.903045
hsa-miR-203a-3p	5.13267	4.93282	5.28828	0.320818	6.14487	5.04531	4.57695	2.79963	2.88063	-1.14476	-0.195044	0.76848	0.903045
hsa-miR-15a-5p	2788.23	3343.93	5574.06	11978.8	10194.4	5273.77	7911.2	3749.12	6325.03	-1.16528	-0.220677	0.769864	0.903117
hsa-miR-3181	32.5234	43.136	9.89304	13.3139	14.3088	43.2979	24.6312	7.88985	28.9733	1.15663	0.20993	0.770281	0.903117
hsa-miR-4659a-5p	41.2095	28.5999	14.9295	6.49656	6.32043	26.1897	31.4364	18.0703	14.4867	1.15346	0.205969	0.769236	0.903117
hsa-miR-1227-5p	4.6885	4.77539	1.40301	4.49145	6.75935	7.01756	4.81784	3.01172	5.05154	1.13284	0.179941	0.76977	0.903117
hsa-miR-128-1-5p	9.08088	9.23592	6.29557	15.0784	9.56844	11.7877	10.4186	3.01172	9.60211	-1.12993	-0.176236	0.771359	0.90337
hsa-miR-6839-3p	12.3382	11.335	22.0165	8.26106	6.05708	11.6042	7.52788	19.7246	16.1983	1.14282	0.192596	0.771313	0.90337
hsa-miR-10527-5p	3.94821	5.14273	3.09382	0.0802044	1.66789	3.94451	3.31227	1.824	3.84084	1.15017	0.201841	0.773083	0.904883
hsa-miR-3655	3.25727	1.73174	1.33106	4.81227	4.56476	1.92639	1.38513	4.41153	3.13112	-1.13927	-0.188108	0.773676	0.905071
hsa-miR-3668	1.82605	2.36146	0.503646	2.00511	1.58011	0.825596	2.10781	2.20577	2.3379	1.13811	0.186642	0.77634	0.90768
hsa-miR-1307-5p	18.1124	19.364	2.15848	2.08532	1.22897	5.82504	10.2981	15.7797	8.09917	1.16206	0.216679	0.778965	0.908496
hsa-miR-6125	25.5647	18.8917	150.302	109.72	45.7354	68.7996	67.8111	38.304	61.537	-1.18511	-0.245026	0.778055	0.908496
hsa-miR-4707-3p	1.33252	0.734676	6.51142	0.160409	3.95027	1.46773	1.92714	3.86009	4.63406	1.1664	0.222064	0.779027	0.908496
hsa-miR-8078	363.038	273.194	76.9139	309.75	259.928	273.226	112.858	159.621	317.997	-1.18809	-0.248642	0.779207	0.908496
hsa-miR-19a-5p	2.07281	1.15449	1.29509	4.17063	0.351135	1.78879	1.98736	3.22381	1.2107	1.13768	0.186096	0.778126	0.908496
hsa-miR-491-5p	7.99513	10.3379	8.41808	0.160409	7.0227	7.1093	8.79256	12.5983	2.75539	1.14885	0.200197	0.780517	0.909517
hsa-let-7f-2-3p	17.076	19.364	8.13028	20.2115	30.8121	11.7877	16.6216	19.258	19.4547	-1.13569	-0.183571	0.781854	0.910569
hsa-miR-5584-3p	1.57928	1.57431	2.26641	0.160409	1.14119	1.00906	0.782899	2.58753	0.375735	-1.1452	-0.195595	0.783015	0.910587
hsa-miR-2682-3p	12.1901	7.60914	8.6699	17.7252	17.6445	22.1535	9.27435	10.7319	14.9876	1.12388	0.168484	0.78361	0.910587
hsa-miR-152-5p	4.6885	5.82493	6.43947	0.320818	6.23265	2.61439	3.79405	5.21748	5.05154	-1.13034	-0.176754	0.782367	0.910587
hsa-miR-1231	3.89886	3.88329	2.5542	0.320818	1.05341	3.16478	3.19182	4.24186	0.292238	1.15232	0.204544	0.783467	0.910587
hsa-miR-711	0.641584	0.892106	1.00729	0.561431	6.496	0.963195	0.301115	1.69674	3.59035	-1.15797	-0.211597	0.78497	0.911157
hsa-miR-6762-3p	1.08576	1.31192	1.29509	0.401022	1.22897	1.28426	1.62602	1.56949	0.584476	1.14799	0.199113	0.784745	0.911157
hsa-miR-6892-3p	0.838995	1.10201	3.74137	2.72695	9.65622	1.05493	0.542007	3.648	11.5225	1.1644	0.219583	0.787864	0.912493
hsa-miR-4677-3p	2.56634	1.78421	0.431696	2.16552	0.614487	2.38505	1.74647	0.169674	1.00196	-1.14585	-0.196415	0.78744	0.912493
hsa-miR-4710	4.78721	5.82493	0.53962	0.160409	1.14119	4.17384	4.6974	1.10288	1.62818	1.15711	0.210523	0.787518	0.912493
hsa-miR-6808-3p	3.84951	3.6209	3.66942	5.29349	5.26703	6.87996	5.17918	4.58121	2.58839	1.11563	0.157857	0.786618	0.912493
hsa-miR-4774-5p	0.592232	0.367338	0.935342	1.60409	0.70227	0.458664	1.02379	0.381767	1.04371	-1.14655	-0.197304	0.789289	0.913638
hsa-miR-3185	4.19497	3.35852	4.24501	8.74228	7.19827	3.71518	2.04758	3.39349	10.5623	-1.11776	-0.160615	0.790325	0.914253
hsa-miR-185-5p	258.114	313.444	66.841	117.5	68.9981	196.079	213.43	96.2901	49.9727	-1.18756	-0.248002	0.790887	0.914253
hsa-miR-6762-5p	7.89642	6.71704	0.935342	0.160409	2.89687	5.7333	7.88922	3.4359	0.292238	1.16177	0.216329	0.79113	0.914253
hsa-miR-6801-3p	1.13511	1.52183	4.38891	6.89758	5.17924	2.88958	1.38513	5.64167	3.54861	-1.12791	-0.173656	0.792303	0.914749
hsa-miR-7162-3p	2.76375	3.14861	3.4176	0.160409	0.70227	2.24745	3.1316	0.848371	1.00196	-1.14612	-0.196755	0.792433	0.914749
hsa-miR-6865-3p	1.23382	1.52183	2.05056	3.44879	8.95395	1.05493	1.62602	2.88446	6.42924	-1.13743	-0.185781	0.793241	0.915177
hsa-miR-3914	5.92232	7.55667	2.26641	0.160409	0.263351	4.08211	3.61338	0.339349	3.17287	-1.15946	-0.213449	0.794074	0.915219
hsa-miR-2113	1.67799	2.20403	2.62615	6.73717	1.84346	1.28426	0.722676	4.1146	4.46707	-1.13167	-0.178455	0.794151	0.915219
hsa-miR-576-3p	2.71439	2.62384	2.01458	0.240613	0.877838	2.33919	3.07137	0.805953	1.58644	1.12779	0.173496	0.795925	0.915269
hsa-miR-4790-3p	1.72734	1.73174	1.36704	0.882249	2.63351	1.28426	1.26468	1.86642	1.41944	-1.11312	-0.15461	0.795154	0.915269
hsa-miR-561-5p	8.19254	7.97648	3.23772	7.2986	4.38919	6.65063	7.34721	2.33302	6.01175	-1.11554	-0.157741	0.795682	0.915269
hsa-miR-6749-3p	5.42879	4.3031	16.3325	29.034	28.1786	6.60477	5.66096	17.9006	28.3053	-1.13763	-0.186031	0.795943	0.915269
hsa-miR-12132	1.62864	1.99412	1.15119	0.240613	0.438919	0.917328	0.60223	0.805953	2.75539	1.14506	0.195428	0.80045	0.918734
hsa-miR-3065-3p	2.27022	2.41393	1.83471	1.04266	2.98465	2.06399	2.28848	1.99367	1.2942	-1.11084	-0.151656	0.800711	0.918734
hsa-miR-934	0.690937	0.314861	1.04327	2.16552	0.614487	0.183466	0.361338	0.89079	3.00588	1.15922	0.213148	0.800023	0.918734
hsa-miR-5006-5p	2.17152	2.30898	15.5411	0.320818	2.98465	4.58664	2.95093	8.69581	5.13504	1.13958	0.188501	0.800634	0.918734
hsa-miR-6771-5p	3.70145	5.71998	0.251823	0.481227	2.10681	2.20159	1.92714	2.88446	4.17483	1.13782	0.186278	0.802221	0.919962
hsa-miR-6808-5p	8.88347	10.7053	8.3821	12.7525	9.56844	3.71518	4.75762	12.259	15.3216	-1.11292	-0.154349	0.802827	0.920153
hsa-miR-6836-3p	3.80015	3.88329	13.8862	11.2286	12.0264	3.48585	4.93829	12.5559	10.9798	-1.12013	-0.163669	0.803499	0.92042
hsa-miR-181b-2-3p	3.70145	4.9853	7.08701	0.401022	2.98465	5.04531	5.90186	3.18139	3.25637	1.12359	0.168121	0.804915	0.921537
hsa-miR-18a-3p	7.84707	8.76363	12.2674	21.575	14.6599	5.22877	5.96208	22.8212	24.047	1.11672	0.159269	0.805986	0.922259
hsa-miR-6724-5p	1.18446	2.20403	2.26641	6.01533	3.16022	2.20159	2.58959	5.81134	2.5049	1.11736	0.1601	0.806952	0.92286
hsa-miR-4670-5p	0.592232	0.577245	0.215848	0.0802044	0.0877838	0.366931	0.481784	0.169674	0.166993	-1.1558	-0.208886	0.808349	0.923616
hsa-miR-4696	10.9069	8.02896	7.19494	44.5135	47.0521	8.48529	14.7546	36.48	22.8363	-1.13891	-0.187654	0.808551	0.923616
hsa-miR-6772-3p	2.12216	2.20403	9.49732	0.401022	1.31676	5.09117	3.37249	2.62995	3.00588	1.12189	0.165933	0.808936	0.923616
hsa-miR-4711-5p	4.34303	4.51301	2.08653	6.49656	2.45795	7.15516	3.37249	3.13897	3.84084	1.10435	0.143203	0.811485	0.925517
hsa-miR-518d-5p	11.0056	12.3845	3.38162	9.86515	6.14487	8.16422	8.13011	11.0712	10.3953	1.10442	0.143286	0.811442	0.925517
hsa-miR-548c-3p	2.56634	1.67926	2.842	0.0802044	0.790054	1.60532	2.58959	1.69674	1.37769	1.1159	0.158202	0.816312	0.925662
hsa-miR-548av-3p	2.61569	1.88917	2.33835	2.32593	1.84346	1.92639	2.40892	0.466604	3.17287	-1.11163	-0.152677	0.813638	0.925662
hsa-miR-583	2.27022	1.99412	3.20175	2.64675	2.54573	2.98132	1.92714	6.19311	0.25049	1.11992	0.1634	0.812169	0.925662
hsa-miR-3943	0.987053	1.10201	1.65484	0.0802044	1.93124	0.733863	0.662453	3.69042	0.208741	1.14677	0.197578	0.8137	0.925662
hsa-miR-7845-5p	2.02346	1.57431	637.579	3.20818	2.98465	2.24745	2.28848	392.923	15.7391	-1.25345	-0.325906	0.816363	0.925662
hsa-miR-194-3p	1.03641	0.944583	0.287797	1.36348	5.00368	4.54078	1.86691	1.35739	0.0834966	1.14382	0.193854	0.814141	0.925662
hsa-miR-361-3p	4.39238	4.14567	0.719494	0.0802044	4.56476	2.47679	2.10781	6.36279	1.71168	1.13815	0.186689	0.815485	0.925662
hsa-miR-6887-3p	4.39238	5.24768	18.1672	9.86515	18.5224	4.21971	3.19182	15.6525	27.4286	1.124	0.168637	0.815918	0.925662
hsa-miR-3176	7.45225	7.18933	14.8575	8.74228	9.48065	6.87996	7.82899	8.52613	11.5643	-1.10031	-0.137912	0.815877	0.925662
hsa-miR-5681a	11.8446	6.82199	6.04375	6.49656	7.0227	8.39356	3.55316	11.1985	4.59231	-1.10173	-0.13977	0.813469	0.925662
hsa-miR-1207-5p	10.0679	7.7141	17.8434	6.41636	12.992	11.329	9.33457	25.8329	2.67189	1.1157	0.157944	0.816475	0.925662
hsa-miR-127-5p	4.54044	5.40512	1.90666	0.240613	2.10681	3.16478	3.61338	1.65432	4.38357	1.12054	0.164192	0.816978	0.925731
hsa-miR-580-5p	6.5639	6.55961	4.35294	2.56654	11.2363	7.1093	7.64832	3.18139	9.60211	1.10272	0.141068	0.81831	0.926238
hsa-miR-3074-3p	1.8754	2.09907	1.00729	0.240613	1.14119	2.06399	1.68624	0.721116	0.0417483	-1.14123	-0.190588	0.817899	0.926238
hsa-miR-3161	1.48058	1.52183	4.89256	0.160409	0.175568	1.42186	1.50558	2.03609	2.58839	1.12755	0.173189	0.819308	0.926867
hsa-miR-6779-3p	4.93526	2.41393	2.33835	1.28327	6.14487	4.72424	4.27584	3.60558	2.54665	1.10928	0.14962	0.820247	0.927147
hsa-miR-12122	1.08576	0.577245	1.87068	2.24572	2.63351	0.733863	0.361338	1.95125	4.42532	1.1209	0.164662	0.820883	0.927147
hsa-miR-4743-3p	2.22087	1.83669	6.90714	3.44879	6.496	1.78879	1.32491	6.65972	5.38553	-1.10046	-0.138107	0.820881	0.927147
hsa-miR-3617-3p	1.92475	2.2565	1.76276	0.641636	4.38919	1.78879	2.71004	2.16335	2.96413	1.10487	0.143872	0.822038	0.927951
hsa-miR-3649	2.31957	1.83669	0.935342	0.160409	2.7213	2.33919	3.19182	1.06046	0.584476	1.11873	0.161856	0.823233	0.928798
hsa-miR-3614-3p	4.39238	4.04072	4.46086	0.240613	0.526703	2.52265	2.16803	4.49637	3.08937	1.11265	0.153995	0.825757	0.929316
hsa-miR-378j	3.25727	3.09613	2.26641	0.401022	3.86249	5.5957	1.74647	1.18772	0.751469	-1.11271	-0.154073	0.825202	0.929316
hsa-miR-143-5p	0.987053	1.10201	2.33835	0.401022	1.93124	1.23839	1.80669	3.01172	0.0417483	1.11969	0.163099	0.825911	0.929316
hsa-miR-5705	2.66504	2.51889	4.67671	0.641636	1.93124	4.21971	2.58959	0.381767	1.83693	-1.1136	-0.155226	0.825222	0.929316
hsa-miR-6809-3p	2.66504	2.0466	2.33835	4.25084	4.65254	3.76105	2.40892	6.32037	1.37769	1.09803	0.134913	0.825318	0.929316
hsa-miR-4494	4.98462	3.46347	0.61157	3.36859	5.17924	4.63251	2.71004	1.23014	7.01371	1.11091	0.151747	0.827465	0.929348
hsa-miR-1468-3p	2.36893	1.83669	0.647544	1.7645	1.58011	2.61439	1.80669	0.381767	2.46315	1.10969	0.150154	0.826777	0.929348
hsa-miR-6835-5p	3.05986	3.25356	0.827418	3.84981	2.98465	2.33919	1.32491	0.509023	5.80301	-1.11463	-0.15656	0.826998	0.929348
hsa-miR-23a-3p	10716.6	13113.2	6687.01	11271.6	16104.2	17722.1	22668.4	5931.56	5455.83	1.11797	0.160885	0.827715	0.929348
hsa-miR-101-5p	1.72734	1.41687	1.15119	2.16552	2.80908	2.52265	1.14424	0.254511	4.21658	1.1065	0.14601	0.831048	0.932091
hsa-miR-423-3p	2484.21	2603.9	2094.45	6176.78	7028.06	4580.5	5187.67	3916.17	4482.56	1.11387	0.155583	0.830882	0.932091
hsa-miR-34b-3p	1.28317	1.46935	13.2747	20.5323	44.243	9.58608	13.3093	19.7671	30.017	1.12545	0.1705	0.831623	0.932237
hsa-miR-4510	58.1374	54.471	59.3582	146.132	67.1546	98.9797	70.7018	44.8364	58.4476	-1.1286	-0.174539	0.832302	0.932498
hsa-miR-7973	0.9377	0.734676	1.04327	3.84981	0.175568	0.64213	0.662453	1.56949	1.87867	-1.12342	-0.167892	0.834064	0.933475
hsa-miR-384	6.71196	4.56549	2.51823	0.0802044	6.58379	2.66025	2.22825	4.66604	5.26029	-1.1046	-0.143526	0.833855	0.933475
hsa-miR-4445-3p	1.57928	2.0466	2.66213	3.93002	0.351135	3.21065	1.92714	4.24186	0.0834966	1.11611	0.158484	0.835835	0.934653
hsa-miR-584-5p	114.498	129.67	33.9241	29.7558	41.9607	100.31	99.0067	44.0305	72.3498	1.12766	0.173337	0.83601	0.934653
hsa-miR-4999-3p	0.641584	0.629722	0.287797	2.96756	1.58011	0.687996	1.08401	0.89079	1.58644	-1.11904	-0.162258	0.836469	0.934667
hsa-miR-4804-3p	1.77669	1.62678	1.29509	3.84981	2.63351	2.01812	1.14424	3.01172	1.79518	-1.09104	-0.1257	0.837638	0.935475
hsa-miR-1251-3p	5.6262	4.09319	11.7997	12.7525	20.5414	12.5674	9.75613	14.1254	11.3973	1.09511	0.13108	0.838776	0.936245
hsa-miR-3611	4.78721	3.56843	5.9718	0.401022	3.95027	2.79785	2.52937	4.87814	3.54861	-1.09239	-0.127488	0.839253	0.936279
hsa-miR-374a-5p	56.2127	84.1204	14.9295	45.0749	31.3388	41.876	66.3658	56.9681	44.0445	1.12876	0.174739	0.840484	0.937153
hsa-miR-4659a-3p	2.41828	2.36146	4.24501	12.5921	1.75568	2.06399	2.22825	5.13265	7.63994	-1.0916	-0.126447	0.841116	0.937359
hsa-miR-6512-5p	0.789642	1.15449	0.647544	0.0802044	0.263351	0.0917328	0.060223	0.0848371	1.83693	-1.14236	-0.192011	0.841756	0.937573
hsa-miR-5007-3p	16.2864	17.5797	2.26641	5.21329	7.0227	14.4479	13.2491	1.06046	6.26224	-1.10637	-0.145836	0.843397	0.938902
hsa-miR-514a-5p	25.9101	19.3115	679.778	6.89758	12.9042	24.9972	31.0149	582.322	62.7059	1.17645	0.234436	0.845528	0.940773
hsa-miR-500a-5p	5.37944	4.88035	2.5542	5.05288	3.86249	2.88958	4.15539	5.09023	3.92434	-1.07628	-0.106053	0.847029	0.941326
hsa-miR-330-3p	15.7435	13.0143	74.5755	39.0596	20.2781	9.99888	12.4059	65.9609	57.7379	1.12241	0.166596	0.848204	0.941326
hsa-miR-1292-3p	5.18203	4.19815	64.7904	2.24572	2.63351	3.99038	1.98736	42.6731	7.22246	-1.13283	-0.179927	0.849075	0.941326
hsa-miR-6777-5p	31.487	23.772	7.26689	10.988	8.86616	28.2537	27.0401	9.16241	8.39141	1.10375	0.142409	0.848794	0.941326
hsa-miR-5186	5.67555	3.93576	7.30286	10.3464	4.65254	7.56796	5.4803	11.4106	3.25637	1.08696	0.120305	0.847669	0.941326
hsa-miR-6874-5p	4.73785	4.72292	0.971317	2.88736	4.65254	5.50397	4.03494	2.75721	3.29812	1.08806	0.121762	0.849171	0.941326
hsa-miR-498-5p	2.46763	3.04366	2.48225	3.6894	0.790054	2.43092	1.68624	3.52074	1.54469	-1.09022	-0.124624	0.847697	0.941326
hsa-miR-18a-5p	36.1755	43.5558	6.00777	37.8565	17.0301	28.3454	39.8676	20.3609	13.9857	-1.09721	-0.133846	0.851145	0.94156
hsa-miR-1207-3p	2.07281	2.20403	4.53281	6.65697	4.38919	3.48585	2.46914	4.92055	6.09525	1.07829	0.10874	0.850771	0.94156
hsa-miR-4442	2.02346	3.6209	2.94992	0.0802044	4.03806	4.03625	4.15539	1.27256	1.75343	1.09801	0.134889	0.851195	0.94156
hsa-miR-4434	10.3147	8.6062	17.8434	7.69963	2.98465	6.78823	5.29963	15.3979	7.4312	-1.09077	-0.12535	0.851944	0.94156
hsa-miR-8057	8.38995	9.60326	17.3758	9.38392	9.12952	5.5957	7.52788	16.8826	9.89435	-1.08239	-0.114216	0.85208	0.94156
hsa-miR-2053	22.0606	34.5298	4.56879	0.160409	0.438919	10.0906	12.3457	7.25358	14.4449	-1.12047	-0.1641	0.850207	0.94156
hsa-miR-3691-3p	9.08088	7.29428	13.6344	16.2815	22.4727	15.5029	19.2714	9.84111	14.6954	1.08102	0.112388	0.856507	0.944408
hsa-miR-1253	6.4652	5.92988	16.5843	41.0647	27.0374	7.61383	11.3219	35.2498	31.019	1.09843	0.135447	0.857815	0.944408
hsa-miR-34a-5p	16831.7	18215.9	10225.2	16467.1	22757.3	17642.8	21161.2	13176.1	10101.8	-1.08885	-0.122802	0.856946	0.944408
hsa-miR-3165	78.372	75.4617	135.193	474.971	515.291	197.455	167.661	445.437	337.952	1.12236	0.166534	0.857644	0.944408
hsa-miR-376b-5p	1.33252	1.46935	1.87068	0.802044	2.54573	3.02718	1.86691	1.52707	0.584476	1.08862	0.122506	0.856061	0.944408
hsa-miR-12116	2.31957	2.57137	0.683519	0	0.263351	1.42186	1.74647	1.824	0.25049	1.10703	0.146689	0.857739	0.944408
hsa-miR-7159-3p	7.79772	8.02896	1.90666	2.56654	0.438919	8.48529	5.54052	2.2906	1.87867	1.09173	0.126618	0.855772	0.944408
hsa-miR-32-3p	6.02102	8.92106	3.4176	7.2184	12.5531	4.35731	6.32342	8.69581	13.3177	1.07765	0.107885	0.859583	0.944676
hsa-miR-1237-3p	9.2783	10.3904	86.4831	14.116	18.5224	17.154	20.8974	43.8608	40.9551	1.10562	0.14486	0.860314	0.944676
hsa-miR-6829-5p	2.02346	2.09907	1.51094	7.2184	2.54573	6.46717	2.28848	4.19944	0.459231	1.09402	0.129643	0.860115	0.944676
hsa-miR-4652-5p	1.33252	1.15449	1.04327	0	2.37016	1.23839	0.240892	0.339349	2.4214	-1.10895	-0.149194	0.86006	0.944676
hsa-miR-585-5p	0.493526	0.524768	1.11522	0.401022	0.526703	0.412798	0.301115	1.78158	0.25049	1.10216	0.140337	0.858955	0.944676
hsa-miR-6729-3p	2.02346	1.88917	0.215848	2.24572	2.1946	1.78879	2.16803	1.18772	2.21266	1.0845	0.117032	0.862701	0.945238
hsa-miR-6764-3p	11.8446	12.3845	14.0661	6.57676	11.9386	11.3749	9.33457	9.16241	12.5245	-1.0777	-0.10795	0.862024	0.945238
hsa-miR-6744-5p	9.77182	8.13391	7.80651	24.6228	12.7287	14.5855	9.45502	22.5243	7.72344	1.07944	0.110285	0.862328	0.945238
hsa-miR-363-5p	3.84951	3.67338	0.359747	3.28838	2.1946	2.93545	4.09517	0.763534	3.84084	1.08769	0.121268	0.863082	0.945238
hsa-miR-150-3p	0.987053	0.944583	2.59018	0.320818	5.09146	0.64213	0.782899	2.79963	3.00588	-1.0921	-0.127106	0.863052	0.945238
hsa-miR-4799-5p	1.48058	2.09907	1.00729	0.0802044	0.351135	1.51359	1.74647	1.18772	0.0834966	1.10629	0.145734	0.863648	0.945363
hsa-miR-450b-3p	12.8317	13.6965	32.4492	10.7474	8.33946	8.43942	10.8401	20.9548	17.409	-1.08617	-0.119244	0.86427	0.945549
hsa-miR-382-3p	7.45225	16.5827	3.56149	5.29349	0.526703	6.32957	10.1777	4.53879	8.05742	1.08557	0.118448	0.866197	0.947162
hsa-miR-33a-3p	9.13024	9.34088	3.56149	7.77983	2.80908	6.05437	9.57546	3.81767	5.0098	-1.07165	-0.0998314	0.86808	0.947525
hsa-miR-4726-3p	2.22087	2.15155	0.755468	0	3.248	2.24745	3.1316	0.509023	1.46119	1.09401	0.129631	0.869289	0.947525
hsa-miR-10398-3p	15.3487	17.9996	109.831	8.9829	18.3468	12.3839	11.5628	59.7678	39.4939	-1.10775	-0.147627	0.869696	0.947525
hsa-miR-6748-3p	1.8754	1.99412	3.52552	3.6894	1.14119	1.74292	1.62602	3.86009	3.29812	1.0739	0.102863	0.867105	0.947525
hsa-miR-3615	30.5493	30.0168	6.00777	1.36348	16.0644	15.8239	26.0766	5.76893	13.8604	-1.09315	-0.128496	0.868594	0.947525
hsa-miR-133a-5p	0.987053	1.15449	0.935342	0.160409	2.45795	1.00906	1.02379	1.10288	1.75343	1.08877	0.122699	0.868662	0.947525
hsa-miR-6843-3p	2.86245	2.7288	14.3539	8.02044	9.12952	7.33863	3.49294	7.12632	9.64386	-1.07466	-0.103874	0.8696	0.947525
hsa-miR-103a-3p	595.094	570.213	207.646	279.031	220.864	586.173	700.755	183.672	179.685	1.10137	0.139304	0.870963	0.947919
hsa-miR-3674	6.36649	4.46053	19.1745	6.65697	3.7747	5.7333	8.97323	7.38083	8.18267	-1.07505	-0.104404	0.870929	0.947919
hsa-miR-6785-3p	1.92475	1.83669	0.791443	1.52388	2.10681	1.19253	1.14424	0.721116	2.96413	-1.0723	-0.100714	0.872097	0.94866
hsa-miR-614	4.98462	3.77833	8.0943	8.02044	6.75935	3.48585	6.68476	5.00539	8.4749	-1.06891	-0.0961375	0.873041	0.948966
hsa-miR-8485	2.27022	4.09319	1.72678	0.561431	2.28238	1.05493	2.04758	2.07851	4.25833	1.07408	0.103095	0.875097	0.948966
hsa-miR-431-3p	6.51455	6.29722	1.07924	11.2286	8.6906	13.2095	10.5993	0.848371	4.59231	1.08245	0.114301	0.87428	0.948966
hsa-miR-5088-3p	1.48058	1.67926	2.66213	0.0802044	3.51135	1.74292	1.50558	2.46028	2.4214	1.07858	0.109137	0.874302	0.948966
hsa-miR-6506-3p	1.52993	1.3644	1.33106	6.49656	2.7213	3.62345	2.04758	1.69674	2.5049	-1.07447	-0.10363	0.874777	0.948966
hsa-miR-5681b	4.88591	4.14567	1.15119	6.17574	5.00368	3.71518	4.39628	3.05414	4.75931	-1.0649	-0.0907182	0.87499	0.948966
hsa-miR-524-3p	1.57928	1.88917	6.69129	7.2184	5.26703	10.641	2.83048	0.212093	3.00588	-1.08506	-0.11777	0.876809	0.949813
hsa-miR-888-3p	1.77669	1.57431	0.107924	3.20818	0.351135	0.779729	0.662453	2.20577	1.46119	-1.09151	-0.126319	0.876971	0.949813
hsa-miR-6804-5p	2.66504	3.14861	1.69081	12.0307	2.7213	4.54078	3.79405	5.98102	4.59231	1.06922	0.0965625	0.877239	0.949813
hsa-miR-137-5p	4.93526	5.35264	0.863392	0.401022	3.86249	4.17384	4.09517	1.78158	1.37769	-1.08258	-0.114476	0.878986	0.951212
hsa-miR-4747-5p	3.40533	3.25356	5.36023	7.77983	2.63351	3.66931	1.50558	7.84743	3.75735	-1.06609	-0.0923315	0.883162	0.955238
hsa-miR-511-3p	1.08576	0.99706	2.62615	8.74228	2.28238	3.25652	2.40892	5.34474	2.4214	1.07447	0.103621	0.88723	0.955441
hsa-miR-4267	1.23382	1.15449	1.22314	2.40613	4.12584	1.42186	0.903345	0.975627	4.13308	-1.07216	-0.100522	0.885701	0.955441
hsa-miR-4456	9.47571	9.86565	8.77782	15.3993	8.6906	21.0068	16.5011	4.75088	2.5049	1.07112	0.0991139	0.884341	0.955441
hsa-miR-627-3p	2.91181	3.35852	5.75595	2.40613	5.53038	2.75199	2.71004	4.07218	5.55252	-1.05747	-0.0806224	0.886903	0.955441
hsa-miR-193a-5p	97.9156	116.394	105.622	169.071	90.5051	102.603	137.971	73.1296	112.637	-1.08743	-0.120924	0.884703	0.955441
hsa-miR-6798-3p	11.7459	4.72292	1.43899	0.0802044	0.263351	1.97226	1.32491	3.22381	6.97197	-1.08488	-0.117541	0.887456	0.955441
hsa-miR-516b-5p	2.61569	1.78421	0.179873	1.60409	2.45795	1.69706	2.46914	2.16335	0.0834966	-1.07757	-0.107778	0.886392	0.955441
hsa-miR-874-3p	24.9724	30.1742	11.9796	39.621	16.1522	26.786	20.8372	23.1181	34.3588	1.0702	0.0978829	0.884849	0.955441
hsa-miR-3680-3p	1.03641	1.83669	2.5542	0.0802044	2.28238	1.74292	1.5658	1.27256	2.17091	1.07325	0.101992	0.885455	0.955441
hsa-miR-5190	1.8754	2.15155	0.863392	3.12797	0.438919	3.57758	1.20446	1.23014	0.292238	-1.07375	-0.102662	0.888242	0.955796
hsa-miR-92a-1-5p	10.5615	14.1687	4.10111	29.435	41.6095	22.0159	22.6439	10.6471	19.1625	-1.07118	-0.0992069	0.889121	0.95625
hsa-miR-885-5p	0.197411	0.419815	0.61157	0	1.84346	0.366931	0.843122	0.339349	1.08546	1.08682	0.120119	0.890226	0.956456
hsa-miR-617	0.690937	0.787153	0.215848	0.0802044	3.248	0.871462	1.08401	0.381767	1.96217	1.08588	0.118859	0.88989	0.956456
hsa-miR-4746-5p	6.4652	6.61208	6.94311	4.65186	16.9423	10.9162	3.73383	7.63534	8.97588	-1.05974	-0.083709	0.892185	0.957158
hsa-miR-4680-3p	1.57928	1.25944	2.33835	7.94024	0.175568	0.596264	1.20446	1.06046	6.97197	-1.07888	-0.109539	0.891489	0.957158
hsa-miR-2052	1.48058	1.15449	1.54691	0	0.438919	0.0917328	0.722676	0.805953	2.46315	1.088	0.121675	0.892251	0.957158
hsa-miR-6814-5p	2.91181	2.83375	14.3179	5.61431	3.51135	2.06399	2.95093	14.083	2.88063	-1.06477	-0.0905385	0.894021	0.957698
hsa-miR-6078	5.18203	4.46053	5.71998	11.2286	4.21362	11.2373	4.93829	3.60558	3.46511	-1.05834	-0.0818096	0.894126	0.957698
hsa-miR-6809-5p	4.09627	4.9853	1.54691	6.17574	7.72498	5.5957	4.4565	4.28428	4.00784	-1.05857	-0.0821104	0.893561	0.957698
hsa-miR-6838-3p	4.19497	4.88035	0.395722	0	4.82811	5.09117	3.25204	0.466604	1.79518	-1.07978	-0.110739	0.894802	0.957933
hsa-miR-1908-3p	5.92232	11.7548	6.43947	5.93513	4.12584	4.40318	5.72119	8.44129	10.3953	1.05618	0.0788495	0.895597	0.958293
hsa-miR-4776-5p	2.17152	2.51889	3.81332	6.33615	1.93124	1.69706	1.50558	3.4359	5.92826	-1.06234	-0.0872425	0.896211	0.95846
hsa-miR-4462	4.88591	3.30604	16.8362	0.160409	4.12584	2.43092	6.20297	11.3682	1.96217	-1.07115	-0.0991596	0.89824	0.959763
hsa-miR-8069	2.41828	1.62678	3.2737	3.6894	2.10681	2.15572	1.02379	3.4359	4.42532	1.05839	0.0818699	0.89839	0.959763
hsa-miR-6735-3p	8.68606	8.71116	3.63344	19.4095	7.19827	15.6405	7.28699	8.39888	8.80889	1.05663	0.0794749	0.898804	0.959763
hsa-miR-3667-5p	14.1642	13.2766	218.258	3.28838	15.7133	11.7418	10.1777	190.714	19.8304	1.09747	0.134185	0.900523	0.960619
hsa-miR-4773	2.96116	2.83375	0.827418	2.16552	0.263351	1.33013	1.32491	1.06046	3.13112	-1.06223	-0.0871021	0.90007	0.960619
hsa-miR-3140-3p	12.9304	12.6469	2.4103	0.0802044	2.37016	6.37543	3.43271	8.86548	4.13308	-1.06954	-0.0969858	0.901104	0.960749
hsa-miR-5586-3p	1.82605	1.67926	4.06514	4.49145	2.45795	2.10986	2.16803	3.09656	3.59035	-1.05412	-0.0760324	0.901768	0.960968
hsa-miR-5197-3p	2.02346	1.15449	0.431696	0.0802044	2.01903	1.00906	0.903345	2.03609	0.918463	1.06903	0.0962964	0.902799	0.961577
hsa-miR-6873-5p	4.49109	3.6209	849.434	2.40613	0.790054	2.88958	3.6736	752.251	15.6139	1.12459	0.169401	0.906469	0.961917
hsa-miR-6761-3p	1.62864	1.57431	1.22314	0	1.31676	0.733863	0.963568	0.212093	3.04763	1.07144	0.0995554	0.90668	0.961917
hsa-miR-4502	9.47571	12.0172	11.8357	25.0238	20.5414	8.57702	4.93829	16.5857	29.4743	-1.05697	-0.079931	0.906545	0.961917
hsa-miR-3920	2.12216	2.15155	1.00729	0.160409	0.877838	1.92639	1.44535	0.0848371	1.33595	-1.06813	-0.0950811	0.906323	0.961917
hsa-miR-15b-3p	31.1415	37.7309	32.2333	90.4706	103.234	29.2169	46.7331	78.0926	65.5448	-1.07311	-0.101803	0.906793	0.961917
hsa-miR-92b-5p	7.20548	11.0726	80.8711	15.7201	18.1712	11.2373	7.52788	73.0872	22.6693	1.07544	0.10493	0.904573	0.961917
hsa-miR-1229-3p	3.99756	3.83081	7.05104	8.66208	31.69	7.75143	7.04609	8.2292	23.7965	1.06257	0.0875582	0.903831	0.961917
hsa-miR-6515-5p	6.4652	5.77245	2.12251	7.2184	0.526703	4.54078	4.57695	9.71385	0.0417483	1.06608	0.0923202	0.905366	0.961917
hsa-miR-5739	3.6521	4.51301	5.50413	1.68429	2.45795	4.54078	3.19182	2.33302	5.05154	1.04545	0.0641257	0.909871	0.962257
hsa-miR-6728-3p	2.07281	2.15155	7.33884	7.2986	7.37384	7.33863	3.31227	3.98735	5.30203	-1.04832	-0.0680739	0.908865	0.962257
hsa-miR-219b-3p	3.50404	2.9387	1.40301	6.01533	2.7213	2.84372	4.21561	3.94493	2.79714	1.04995	0.0703138	0.90912	0.962257
hsa-miR-1256	3.89886	6.29722	3.81332	4.81227	6.14487	6.46717	4.93829	5.89618	1.75343	-1.04582	-0.0646293	0.908679	0.962257
hsa-miR-6868-3p	4.93526	4.3031	16.2965	13.8754	4.82811	7.01756	9.57546	10.138	7.05546	-1.0497	-0.0699824	0.909697	0.962257
hsa-miR-4754	1.57928	1.41687	3.02187	2.32593	1.75568	3.30238	2.28848	1.31498	1.71168	1.0524	0.0736892	0.908066	0.962257
hsa-miR-4728-3p	1.52993	0.83963	0.143899	3.12797	0.175568	0.687996	0.843122	0.848371	2.54665	1.06595	0.0921434	0.913318	0.962594
hsa-miR-4783-3p	13.6213	14.1163	3.99319	0.401022	1.75568	10.7786	7.04609	5.13265	2.75539	-1.05714	-0.0801689	0.914898	0.962594
hsa-miR-377-5p	30.5986	29.7019	139.762	336.538	34.7624	72.6524	66.0044	151.18	137.394	-1.06979	-0.0973311	0.914569	0.962594
hsa-miR-1236-5p	7.5016	5.19521	0.359747	0.160409	2.28238	8.07249	3.25204	0.127256	1.83693	1.06881	0.0960081	0.913864	0.962594
hsa-miR-4632-3p	2.27022	2.15155	8.02236	10.988	7.46162	1.69706	1.80669	5.81134	16.6993	1.05466	0.0767831	0.914376	0.962594
hsa-miR-5589-5p	20.0865	15.1133	11.6198	11.1484	12.7287	16.9247	14.8149	15.4828	12.274	1.0482	0.0679144	0.912384	0.962594
hsa-miR-5093	1.97411	2.0466	2.91395	2.32593	2.37016	2.70612	2.10781	1.61191	2.58839	-1.04307	-0.0608426	0.916165	0.962594
hsa-miR-6881-5p	3.20792	4.3031	7.37481	20.8532	17.9957	1.69706	2.77026	9.45934	26.5937	-1.05894	-0.0826255	0.912173	0.962594
hsa-miR-6740-3p	2.27022	1.46935	1.58289	1.44368	6.58379	1.33013	1.86691	0.848371	6.01175	-1.05328	-0.074891	0.914429	0.962594
hsa-miR-3606-5p	2.86245	2.20403	0.647544	2.16552	0.438919	2.52265	1.50558	0.339349	1.96217	-1.05625	-0.0789466	0.91146	0.962594
hsa-miR-489-3p	1.03641	0.787153	2.05056	0.320818	0.351135	1.00906	0.662453	0.381767	1.50294	-1.06029	-0.0844526	0.915471	0.962594
hsa-miR-4768-5p	1.97411	2.30898	4.28099	2.72695	1.49232	1.97226	1.50558	2.07851	4.30007	-1.04569	-0.0644614	0.916115	0.962594
hsa-miR-12133	49.9942	60.0335	9.46134	69.3768	93.1386	52.1043	60.4639	44.3698	54.3145	-1.06737	-0.0940648	0.914943	0.962594
hsa-miR-500a-3p	2.51698	2.46641	3.77734	1.8447	0.438919	1.46773	2.40892	2.37544	2.37965	-1.04756	-0.0670277	0.918048	0.964089
hsa-miR-7849-3p	2.71439	2.51889	1.47496	0	2.37016	1.33013	0.843122	3.4359	2.04567	1.05159	0.0725766	0.919453	0.96508
hsa-miR-4685-5p	1.72734	1.94164	3.59747	3.28838	7.72498	0.963195	1.44535	5.68409	7.18071	1.05076	0.0714304	0.920506	0.965701
hsa-miR-4779	2.36893	2.2565	14.7496	3.6894	3.33578	3.76105	1.92714	11.2833	3.25637	-1.04745	-0.0668875	0.922802	0.966431
hsa-miR-6846-5p	1.77669	0.99706	0.431696	2.96756	0.70227	2.06399	0.722676	1.1453	1.75343	1.04884	0.0687903	0.923048	0.966431
hsa-miR-5701	1.08576	1.3644	8.6699	17.1638	6.05708	0.733863	0.782899	12.5559	14.9459	1.0574	0.0805189	0.922661	0.966431
[truncated: 95 more rows]
