# Supplementary material for: Distinct brain and lung endothelial miRNA/mRNA profiles after exposure to Plasmodium falciparum-infected red blood cells
Source: iScience. 2024 Oct 28;27(11):111265. doi: 10.1016/j.isci.2024.111265 (PMC11576406; doi:10.1016/j.isci.2024.111265)
Supplement: Table S2. mRNA profiles of HBMECstatic and HMVEC-Lstatic [file mmc3.xlsx]

## Sheet: Primlung-static-vs-primbrai...
Name	prim-brain#1	prim-brain#2	prim-brain#3	prim-brain#4	prim-brain#5	prim-lung#1	prim-lung#2	prim-lung#3	prim-lung#4	prim-lung#5	Fold change	Log fold change	P-value	FDR p-value
COL1A1	0	1.56568	0	0.249443	0.805435	33689.8	19864.5	31206.6	22628.3	24843.3	48575	15.5679	2.61979e-80	3.94068e-76
COL1A2	0	0	0	0.498887	0.575311	19310	13998.5	17777.5	16070.7	15699.8	33617.3	15.0369	3.20475e-74	2.41029e-70
CALCRL	462.952	356.974	311.251	286.61	320.333	3.40673	1.97641	3.15014	2.42658	2.92757	-133.53	-7.06102	6.43872e-51	3.22837e-47
KDR	435.719	699.857	639.794	561.746	634.108	1.70336	2.63521	4.09518	4.08106	3.29351	-183.101	-7.51649	3.17827e-50	1.19519e-46
TIE1	856.585	815.717	989.698	202.797	221.265	1.02202	0.470574	1.89009	0.441196	0.731892	-722.365	-9.49658	3.56687e-49	1.07306e-45
GREM1	0	0	0	5.86192	6.0983	6282.01	5771.68	6342.18	5769.29	5066.52	1149.05	10.1662	1.34774e-48	3.37878e-45
DYSF	646.152	701.423	782.197	208.285	229.434	1.02202	0.0941147	0.315014	0.772092	0.731892	-911.571	-9.83221	6.10079e-48	1.1471e-44
STAB1	302.033	378.893	324.474	259.047	318.722	0	0.470574	0	0.330897	0	-1028.13	-10.0058	5.87219e-48	1.1471e-44
COL6A3	0	0	0	0.249443	0	15303	11099.8	15365.1	11723.2	16258.6	107603	16.7154	3.47851e-47	5.81375e-44
POSTN	0	0	0	0.997773	0.805435	826.813	687.79	754.774	772.092	732.99	934.212	9.86761	5.1888e-47	7.80499e-44
CDH5	786.028	607.482	596.056	965.346	1072.61	0	0	0	0.551495	0	-4052.45	-11.9846	3.57387e-46	4.88711e-43
TINAGL1	170.822	155.002	166.814	338.495	394.088	0.340673	0.752918	0.315014	1.10299	0	-371.017	-8.53534	2.51198e-45	3.14877e-42
COL3A1	0	0	0	0.374165	0.115062	4283.28	1961.07	4090.14	2424.37	4127.14	14630.9	13.8367	4.66137e-45	5.39356e-42
HCLS1	136.162	145.608	183.089	154.156	139.11	0.340673	0.752918	0.315014	0.330897	0.731892	-272.831	-8.09187	7.51979e-45	8.07947e-42
PAPPA	0	0	0	0.873052	0.690373	365.201	345.495	434.72	360.126	611.862	616.187	9.26722	2.37225e-44	2.37889e-41
SULF2	204.243	308.438	273.616	216.267	178.461	1.02202	1.41172	0	2.64717	0.731892	-160.349	-7.32507	5.64861e-42	5.3104e-39
PCDH1	398.584	289.65	351.938	77.8263	103.326	1.02202	0.376459	0.630028	0.441196	0.365946	-440.976	-8.78456	1.66593e-41	1.47405e-38
NFIB	210.433	217.629	203.432	136.196	150.271	0	0.0941147	0	0.551495	0	-771.43	-9.59139	2.65519e-41	2.21886e-38
PRKCH	210.433	211.366	156.643	110.878	124.612	0.681346	2.07052	2.2051	2.42658	0.365946	-89.3089	-6.48073	1.59298e-39	1.26114e-36
NOS3	2325.9	2843.27	2992.49	80.196	109.424	0	0.847032	0	0.441196	0	-4870.29	-12.2498	3.32341e-39	2.49953e-36
VWF	1480.46	115.86	86.4587	1594.94	1825.92	1.36269	0.0941147	0.945043	0.551495	0.365946	-1576.89	-10.6229	3.6594e-39	2.62118e-36
COL6A1	0	0	0	7.98219	8.97485	2491.34	1575.76	2399.15	1729.71	2132	463.923	8.85774	1.23685e-37	8.4567e-35
LRRC32	95.3136	84.5465	95.6131	98.4054	117.709	1.70336	1.59995	2.52011	1.54418	0.731892	-62.1372	-5.95738	4.07346e-37	2.66404e-34
ESAM	85.4109	72.0211	81.3729	305.319	299.047	0.340673	0	0.630028	0.330897	0.731892	-470.248	-8.87728	4.46649e-37	2.79937e-34
ROBO4	96.5514	122.123	109.853	492.152	532.853	0.340673	0.941147	0.315014	1.10299	0	-411.468	-8.68464	7.53419e-37	4.53317e-34
ADAMTS4	60.6541	150.305	176.986	64.8553	87.4473	1.02202	0.752918	0.945043	0.99269	0.731892	-117.738	-6.87944	1.83451e-36	1.06133e-33
ANXA3	126.26	122.123	95.6131	128.837	111.265	1.36269	2.35287	1.89009	2.53687	0	-57.6537	-5.84934	5.4744e-36	3.04985e-33
EMILIN1	0	0	0	0.498887	1.38075	325.683	200.088	317.219	212.105	252.503	313.819	8.29379	8.09533e-36	4.21774e-33
RAPGEF5	198.054	192.578	164.78	77.078	103.211	0	1.78818	0.315014	1.32359	0	-155.825	-7.28378	8.13153e-36	4.21774e-33
CGNL1	354.022	389.853	461.791	57.372	78.0122	0	0.188229	0.315014	0.330897	0.365946	-988.439	-9.94901	1.33845e-35	6.71101e-33
PTK7	1.23784	0	1.01716	0.124722	0.690373	202.36	132.608	156.562	167.103	205.296	345.43	8.43225	1.63708e-35	7.94356e-33
PTPRB	335.454	244.245	216.655	212.276	237.949	1.70336	3.67047	0.945043	3.86046	0	-101.093	-6.65954	4.76527e-35	2.23997e-32
PLA2G4A	108.93	106.466	92.5617	257.176	246.118	2.38471	0.376459	1.89009	0.330897	2.56162	-121.366	-6.92322	1.11724e-34	5.09259e-32
ACVRL1	335.454	225.457	244.119	227.492	248.534	4.76942	3.8587	3.46516	4.19136	7.31892	-57.0619	-5.83446	3.70151e-34	1.63759e-31
SORBS2	214.146	57.93	80.3557	99.2784	124.037	1.02202	0.188229	0	0.110299	0	-467.544	-8.86896	3.99376e-34	1.7164e-31
VCAN	0	0	0	1.12249	2.76149	265.384	304.085	259.572	276.188	200.904	155.044	7.27653	4.89143e-34	2.0438e-31
MXRA8	0	0	0	0.498887	0.230124	551.209	150.489	512.528	145.925	512.69	1179.99	10.2046	7.57651e-34	3.08016e-31
ARHGDIB	44.5622	39.1419	70.1841	399.109	385.804	0.681346	0.658803	0.315014	1.10299	0.731892	-252.243	-7.97867	6.11891e-33	2.42212e-30
IRS1	2.47568	3.13135	1.01716	0	0	367.927	248.839	360.376	245.967	272.63	983.052	9.94112	1.02724e-32	3.96198e-30
COL16A1	0	0	0	0.374165	0.230124	196.909	149.831	180.188	166.772	189.926	614.126	9.26239	1.54816e-32	5.82184e-30
RASGRP3	111.406	167.527	155.626	81.0691	75.826	0.340673	2.72933	0.315014	2.20598	0	-84.6944	-6.40419	7.12743e-32	2.6149e-29
PLEKHG1	79.2217	90.8092	86.4587	63.7328	74.4452	1.02202	0.282344	0	0.99269	1.46378	-108.562	-6.76237	8.04862e-32	2.88256e-29
DCN	0	0	0	0.249443	0	1320.79	1025.19	1309.51	1293.92	1551.98	10020.5	13.2907	2.52185e-31	8.82177e-29
SHROOM4	103.978	95.5062	85.4415	154.78	169.717	1.36269	3.8587	1.89009	4.08106	1.09784	-43.9233	-5.45691	3.14844e-31	1.07634e-28
CREB3L1	3.71352	0	1.01716	0.124722	0	387.686	165.548	392.823	175.927	269.336	770.422	9.5895	4.80602e-31	1.60649e-28
FRMD4B	58.1784	57.93	58.9953	80.9444	92.7401	0	0.470574	0.630028	0.220598	0.365946	-192.774	-7.59076	5.27962e-31	1.72644e-28
ECSCR	84.173	68.8897	61.0297	256.428	261.651	0.340673	0	0	0.441196	0	-740.349	-9.53206	1.08699e-30	3.47884e-28
SFRP1	0	0	0	1.37194	1.95606	73.2447	312.178	79.6986	361.119	125.519	167.322	7.38648	3.25065e-30	1.01867e-27
APLN	127.497	84.5465	89.5102	439.769	508.92	0	1.59995	0	2.31628	0	-272.885	-8.09215	4.19136e-30	1.28666e-27
MGAT4A	61.8919	76.7181	42.7208	152.285	182.949	0	0.0941147	0.315014	0	1.09784	-447.193	-8.80475	5.41025e-30	1.62762e-27
MTSS1	159.681	248.942	228.861	84.4366	104.016	3.06606	4.89396	1.89009	6.28704	3.29351	-39.8695	-5.31721	1.40669e-29	4.14892e-27
TEK	94.0758	64.1927	85.4415	201.8	231.62	3.7474	2.44698	2.2051	3.08837	1.82973	-50.7245	-5.66461	1.85532e-29	5.36686e-27
MAGED4B	1.23784	0	0	1.49666	1.03556	184.304	63.9039	253.586	79.4152	186.267	143.701	7.16693	1.93811e-29	5.50056e-27
ERG	110.168	200.406	221.741	264.16	276.494	0	0	0	0.220598	0	-2247.13	-11.1339	5.53614e-29	1.54212e-26
ADGRF5	199.292	206.669	196.312	158.397	147.74	0	0	0.315014	0.110299	0	-1830.36	-10.8379	6.25323e-29	1.7102e-26
THBD	97.7893	34.4449	40.6864	99.4032	102.635	0	0.0941147	0.945043	0.441196	0.731892	-187.51	-7.55083	7.88006e-29	2.11664e-26
PDE2A	297.081	150.305	112.905	42.4054	41.3073	0.681346	0.188229	0	0	0	-728.819	-9.50942	8.9944e-29	2.37358e-26
APCDD1L	0	0	0	1.7461	4.48743	421.753	151.148	449.84	152.323	220.665	141.079	7.14036	1.34507e-28	3.48837e-26
ALDH1L2	1.23784	1.56568	12.2059	2.61915	3.68199	258.911	284.697	257.367	294.498	240.427	75.4724	6.23788	1.55253e-28	3.95816e-26
SH2D3C	177.011	192.578	193.261	46.5212	54.1943	0.340673	0	0	0.110299	0.365946	-924.799	-9.853	1.86456e-28	4.67445e-26
BCL6B	344.119	327.226	388.556	130.708	146.014	0	0	0	0.220598	0	-2795.29	-11.4488	1.96474e-28	4.84486e-26
ACE	71.7947	180.053	227.844	29.8085	34.9789	0.681346	0.752918	1.26006	1.21329	0.731892	-112.068	-6.80823	3.19439e-28	7.74999e-26
HSPB6	0	0	2.03432	5.23831	5.52299	183.963	221.734	169.478	245.746	162.846	44.2577	5.46786	5.31399e-28	1.26878e-25
HSPA12B	232.714	247.377	291.925	22.6993	26.8095	0.681346	0	0.315014	0.110299	1.46378	-356.236	-8.47669	9.63256e-28	2.26395e-25
ABCA3	68.0811	40.7076	35.6006	112.249	117.709	0.340673	0.0941147	0.945043	0.441196	0	-211.281	-7.72302	1.12764e-27	2.60954e-25
EGFL7	51.9892	46.9703	63.064	221.256	225.292	2.38471	1.31761	2.52011	2.20598	0.731892	-66.2658	-6.05019	1.6457e-27	3.75071e-25
GALNT5	0	0	0	0	0.345187	171.358	217.217	162.862	226.002	233.474	1116.89	10.1253	2.37954e-27	5.34225e-25
COL6A2	0	0	0	0.124722	0	3072.87	1547.43	2964.28	1660.77	2378.65	30039.7	14.8746	2.44219e-27	5.40226e-25
CYP1B1	9.90271	3.13135	4.06864	1.99555	1.38075	320.914	119.337	352.501	152.323	191.39	69.2024	6.11275	3.09901e-27	6.75583e-25
PECAM1	115.119	103.335	79.3386	2108.29	1891.97	0	0	0	0.220598	0	-9756.86	-13.2522	3.50565e-27	7.53313e-25
VASN	1.23784	4.69703	1.01716	0.74833	1.38075	224.844	57.2217	248.861	61.6571	158.455	105.14	6.71616	4.50165e-27	9.53716e-25
MYCT1	39.6108	28.1822	32.5492	257.924	264.183	0	0.752918	0	0.772092	0	-304.25	-8.24912	1.82723e-26	3.81739e-24
THBS2	3.71352	0	0	0	0.115062	122.983	113.879	146.797	124.307	143.085	547.853	9.09764	3.97099e-26	8.18241e-24
CD93	28.4703	25.0508	21.3604	917.702	1030.38	0	0	0.630028	0.220598	0	-2148.21	-11.0689	5.6206e-26	1.1425e-23
TMTC1	1.23784	0	0	1.12249	0.575311	62.3431	141.454	60.7977	146.918	52.3303	120.069	6.90772	7.18783e-26	1.44159e-23
CHPF	0	0	0	0.124722	0.575311	117.191	61.7392	137.031	59.1202	144.183	319.433	8.31937	9.33624e-26	1.84784e-23
NHSL2	38.373	67.324	52.8924	60.9889	75.4808	1.02202	0.0941147	0.315014	0	0.365946	-248.629	-7.95785	9.83392e-26	1.92106e-23
OXTR	0	0	0	0.997773	0.575311	103.565	449.68	112.145	399.944	20.8589	389.69	8.60618	1.00532e-25	1.93871e-23
CRISPLD2	4.95136	9.39405	4.06864	1.24722	0.460249	308.309	164.889	293.278	185.854	137.962	72.4899	6.17971	1.69175e-25	3.22118e-23
PDGFRA	1.23784	4.69703	3.05148	0.997773	1.61087	112.763	54.2101	111.2	62.9807	116.005	53.8639	5.75125	2.28169e-25	4.29016e-23
PRKAR2B	61.8919	57.93	58.9953	104.018	108.043	2.38471	1.88229	1.89009	1.54418	2.92757	-39.9723	-5.32093	2.42633e-25	4.50578e-23
CSPG4	0	0	0	0.124722	0.115062	308.309	244.604	308.084	242.547	213.712	2031.03	10.988	1.97711e-24	3.6268e-22
FLI1	266.135	223.892	188.175	190.201	186.516	3.06606	11.1055	1.57507	10.2578	4.7573	-32.371	-5.01663	4.23331e-24	7.67198e-22
DGKI	0	0	1.01716	0.873052	0.230124	58.9364	157.736	48.1972	161.257	41.3519	174.311	7.44552	4.89484e-24	8.76527e-22
NRARP	153.492	208.235	239.033	10.9755	9.66522	0.340673	0.470574	1.26006	0.110299	0.731892	-216.007	-7.75493	5.22962e-24	9.25459e-22
INPP5D	151.016	175.356	175.969	33.3007	39.6965	1.02202	0.941147	0.945043	1.32359	5.48919	-61.0382	-5.93164	5.39612e-24	9.43819e-22
MYO1D	149.779	159.699	166.814	100.027	106.202	6.81346	4.23516	7.87535	5.51495	8.41676	-21.5263	-4.42803	7.28034e-24	1.25874e-21
CD34	212.908	292.781	293.96	45.3987	22.4371	0	0	0	0.220598	0	-1890.15	-10.8843	8.67767e-24	1.48329e-21
CA12	0	0	0	3.11804	4.2573	119.236	92.8912	129.471	105.887	102.831	34.8297	5.12225	9.75715e-24	1.64907e-21
GPRC5B	81.6974	128.385	113.922	29.0601	24.9685	1.02202	0	1.26006	0.551495	0.365946	-126.509	-6.9831	1.02873e-23	1.71935e-21
ZNF395	1.23784	1.56568	0	1.37194	1.15062	69.4973	81.5974	67.7281	87.1361	90.7546	65.2054	6.02692	2.80735e-23	4.64046e-21
GASK1B	254.995	115.86	89.5102	452.864	430.793	9.87951	6.3998	4.4102	8.49302	8.78271	-35.5417	-5.15144	3.80892e-23	6.22759e-21
CLDN5	492.66	502.582	394.659	14.5924	13.5773	1.02202	0	2.52011	0.110299	0.365946	-361.812	-8.49909	3.89089e-23	6.2932e-21
DNM1	1.23784	3.13135	2.03432	0.374165	0.805435	92.3224	45.5515	77.1785	48.5315	77.2146	77.4458	6.27511	4.31532e-23	6.90543e-21
SNAI2	1.23784	7.82838	8.13729	2.49443	3.91211	86.5309	175.524	112.46	181.221	98.0735	32.5892	5.02632	5.85156e-23	9.26518e-21
ICAM2	27.2325	20.3538	18.3089	246.201	265.909	0.340673	0.0941147	0	0	0.365946	-758.437	-9.56688	6.64224e-23	1.04076e-20
NOTCH3	0	1.56568	3.05148	0	0.690373	186.007	38.3988	191.529	37.6119	190.292	159.233	7.315	8.97635e-23	1.39198e-20
FZD4	206.719	148.739	155.626	534.432	604.652	11.5829	8.65855	16.3807	7.39003	12.0762	-29.7763	-4.8961	9.10082e-23	1.39688e-20
FAT1	24.7568	28.1822	37.635	8.48107	8.74473	692.588	746.706	627.193	739.113	697.493	35.0237	5.13026	2.12596e-22	3.23017e-20
HID1	105.216	97.0719	105.785	18.2094	21.6317	0.681346	0.376459	0	0.110299	1.82973	-126.688	-6.98514	2.24677e-22	3.37959e-20
SCN9A	0	0	0	8.73052	8.05435	214.283	254.957	199.089	230.304	120.762	47.1451	5.55904	2.78594e-22	4.14911e-20
SCARF1	40.8487	17.2224	22.3775	61.7372	64.78	0.681346	0.376459	0.945043	0.330897	0.731892	-76.6441	-6.2601	5.2495e-22	7.74148e-20
PCOLCE	6.18919	0	7.12013	0.74833	0.575311	159.776	85.5503	158.767	99.269	185.169	59.2563	5.8889	5.52891e-22	8.07436e-20
PDE4B	188.152	103.335	114.939	75.3319	78.0122	5.11009	6.87037	7.56034	7.50033	5.85514	-16.4224	-4.03759	7.53642e-22	1.09003e-19
KCNG1	0	0	0	0.374165	0.805435	65.4092	136.843	56.3875	150.448	21.9568	179.952	7.49146	8.21063e-22	1.17623e-19
PCDH12	48.2757	51.6673	46.7894	28.686	28.7655	1.02202	0.282344	0.315014	0.110299	1.09784	-90.0801	-6.49314	9.47037e-22	1.3439e-19
FOXD1	0	0	0	0.997773	0.460249	42.5841	130.725	44.417	142.396	47.207	139.817	7.1274	1.23527e-21	1.73654e-19
COL7A1	16.0919	6.2627	7.12013	0.498887	0.460249	739.942	239.522	658.695	288.101	575.633	90.0015	6.49188	1.25372e-21	1.74616e-19
N4BP3	79.2217	114.294	63.064	14.0935	18.2949	0	0.282344	0.630028	0.441196	0.365946	-151.344	-7.24169	1.39332e-21	1.92278e-19
PTPRE	27.2325	42.2732	39.6693	85.8085	103.556	0	0.188229	0.315014	0	0	-464.793	-8.86045	1.66563e-21	2.27768e-19
LOXL1	0	0	0	3.74165	5.1778	140.357	125.831	122.226	118.682	132.107	32.2638	5.01184	2.11339e-21	2.86393e-19
FBLN1	0	0	0	0	0.115062	413.577	420.693	403.533	449.027	344.721	5252.17	12.3587	2.47948e-21	3.33004e-19
DCHS1	538.46	374.196	366.178	150.414	173.514	14.6489	3.95282	15.4357	6.28704	17.1995	-28.2399	-4.81966	3.36914e-21	4.48483e-19
CAMK2N1	1.23784	0	0	5.48775	4.48743	71.882	156.701	68.6731	148.131	103.197	32.5176	5.02315	4.2944e-21	5.66634e-19
RHOJ	25.9946	7.82838	25.429	208.41	229.204	0.340673	0.470574	0.630028	0.772092	2.19568	-114.5	-6.8392	5.92639e-21	7.75172e-19
ALDH1A1	160.919	142.476	98.6646	159.768	110.69	0	0.0941147	0	0	0	-2177.45	-11.0884	8.89928e-21	1.15399e-18
MERTK	60.6541	56.3643	57.9782	62.8597	70.9934	0.340673	0	0	0	0.365946	-671.062	-9.3903	8.99286e-21	1.15616e-18
DOCK4	288.416	225.457	258.359	234.477	274.999	11.5829	14.3054	13.8606	14.4492	18.2973	-17.7619	-4.15071	9.1249e-21	1.16319e-18
PCDH18	6.18919	3.13135	3.05148	0	0	388.026	101.079	371.717	133.351	540.868	144.402	7.17395	1.09591e-20	1.38526e-18
CDH4	0	0	0	0	0.230124	148.193	89.1266	130.101	85.3714	91.4865	841.445	9.71672	1.48885e-20	1.86627e-18
ADAMTS9	28.4703	28.1822	23.3947	73.0869	108.389	1.36269	0.658803	1.57507	1.10299	1.09784	-47.4772	-5.56916	1.77407e-20	2.20542e-18
CAVIN2	132.449	153.436	154.608	670.129	635.143	10.5609	6.02334	9.76544	7.39003	20.493	-32.5675	-5.02536	1.83422e-20	2.26151e-18
HECW2	75.5082	57.93	60.0125	210.405	239.905	2.72538	7.43506	2.2051	6.28704	2.92757	-28.8576	-4.85088	3.57602e-20	4.37321e-18
ACSL5	175.773	195.709	159.694	4.11581	2.76149	0	0.376459	0.315014	0.441196	0	-376.469	-8.55639	4.36521e-20	5.29528e-18
BACE2	9.90271	14.0911	14.2403	214.646	235.762	0	0.188229	0	0.220598	0	-700.841	-9.45294	6.06866e-20	7.30278e-18
MAGED4	0	0	0	0	1.72593	120.598	77.6446	61.4278	60.4438	77.9465	112.628	6.81543	6.46453e-20	7.71741e-18
MTUS1	9.90271	15.6568	14.2403	215.519	222.07	0.681346	0	0.945043	0	0.365946	-257.723	-8.00968	6.84282e-20	8.1047e-18
CXXC5	0	0	2.03432	1.87082	1.49581	104.246	37.1753	84.7388	41.693	83.8016	47.022	5.55526	9.21939e-20	1.08342e-17
CLMP	0	0	0	8.85524	9.89535	126.39	288.744	140.811	296.263	134.302	43.9432	5.45757	1.05049e-19	1.22492e-17
ABI3	28.4703	21.9195	27.4634	29.6838	42.1128	0.340673	0.658803	0.315014	0.110299	0.731892	-71.054	-6.15084	1.35151e-19	1.5638e-17
AKR1C1	0	0	1.01716	0.124722	0.115062	177.831	13.2702	186.488	19.8538	161.748	534.359	9.06167	2.29583e-19	2.63618e-17
SERPINF1	1.23784	0	2.03432	0	0	72.2227	63.3392	91.0391	73.2385	55.2579	380.836	8.57302	2.52113e-19	2.87294e-17
FGD5	61.8919	76.7181	64.0812	160.267	174.204	0	0.0941147	0	0	0	-1789.88	-10.8056	2.70633e-19	3.0608e-17
ABCB1	99.0271	29.7478	49.8409	32.1782	23.3576	0.340673	1.41172	0.630028	1.43389	1.09784	-41.6262	-5.37942	2.81769e-19	3.16296e-17
SLC12A7	25.9946	36.0105	41.7036	38.7884	38.2006	0.681346	1.12938	0.945043	1.43389	0	-35.2419	-5.13922	3.52692e-19	3.92977e-17
LUM	0	0	0	0.74833	0.345187	36.7927	57.6923	30.8714	79.6358	40.62	103.838	6.69819	4.00725e-19	4.43214e-17
SLC16A2	0	0	1.01716	1.24722	1.03556	55.189	47.1515	60.7977	50.9581	30.7395	46.7346	5.54642	4.56844e-19	5.01594e-17
SORBS1	195.579	167.527	178.003	3.11804	4.14224	1.36269	0.188229	0.630028	0.330897	1.09784	-155.701	-7.28263	6.45685e-19	7.03796e-17
SORT1	16.0919	6.2627	12.2059	11.3497	12.4267	110.719	199.241	129.786	207.141	136.132	13.2206	3.72472	7.43459e-19	8.00816e-17
C1S	0	0	0	0.498887	0	66.7719	36.9871	68.9881	55.0392	53.0622	239.816	7.90578	7.45341e-19	8.00816e-17
MMP1	0	0	0	12618	9502.3	1.36269	1.03526	0.945043	1.98538	0.365946	-3779.2	-11.8839	7.83361e-19	8.35696e-17
ITGB4	243.854	227.023	275.651	0.997773	2.30124	0.681346	0.188229	0.945043	0.330897	0.731892	-261.08	-8.02835	8.51135e-19	9.01604e-17
ABLIM1	45.8	45.4046	65.0983	89.9243	98.4932	3.40673	0.470574	3.78017	0.441196	3.29351	-33.1225	-5.04974	8.75524e-19	9.20954e-17
C1R	4.95136	1.56568	2.03432	0.873052	1.15062	63.0245	36.5165	74.0283	50.4066	49.4027	39.5632	5.30609	9.98142e-19	1.04264e-16
ANO4	0	0	0	0.623608	0.690373	36.1113	60.5158	29.2963	69.0471	31.1054	80.0781	6.32334	1.01066e-18	1.04722e-16
ARHGEF15	102.741	79.8494	93.5788	88.3029	91.9347	0	0	0	0.110299	0	-1466.81	-10.5185	1.01645e-18	1.04722e-16
GLI2	0	0	0	1.24722	1.38075	35.0893	62.0216	46.9371	54.0465	36.5946	42.0725	5.3948	1.09969e-18	1.12527e-16
TBX3	0	0	0	0	0.115062	152.962	212.04	176.093	205.266	215.908	2488.95	11.2813	1.12178e-18	1.14012e-16
ALS2CL	90.3622	39.1419	52.8924	14.0935	15.1882	0	0.188229	0	0.220598	0.731892	-172.905	-7.43383	1.38765e-18	1.40087e-16
TNIK	12.3784	9.39405	13.2231	140.437	148.545	0	0.188229	0	0.220598	0	-458.105	-8.83954	2.88796e-18	2.89605e-16
HES1	125.022	123.688	131.214	27.9377	48.4412	2.72538	0.376459	2.2051	0.661793	4.7573	-45.0174	-5.49241	3.42345e-18	3.4103e-16
LGALS3BP	2.47568	0	4.06864	2.12027	3.56693	67.1126	65.3156	73.7133	65.8484	51.5984	22.9084	4.5178	4.28025e-18	4.23576e-16
SHANK3	429.53	713.948	755.751	111.751	140.951	23.8471	14.8701	20.7909	14.5595	14.6378	-24.2279	-4.59859	5.95163e-18	5.85127e-16
CCDC88C	56.9406	40.7076	36.6178	22.2005	28.4204	0	0.0941147	0.315014	0.110299	0	-268.465	-8.06859	6.26856e-18	6.12284e-16
TCIM	94.0758	46.9703	56.961	32.6771	32.2174	1.36269	1.88229	2.52011	2.97807	1.82973	-23.1928	-4.53561	1.20244e-17	1.16691e-15
NIBAN1	0	0	1.01716	1.49666	0.460249	89.2563	20.8935	90.7241	22.9422	77.2146	71.9074	6.16807	1.25949e-17	1.21444e-15
ARHGAP29	361.449	303.741	340.749	825.657	853.761	17.0336	42.4457	20.4759	30.6631	10.2465	-22.0299	-4.46139	1.28993e-17	1.22804e-15
LMO2	28.4703	36.0105	39.6693	32.1782	30.7216	0.340673	0.0941147	0.315014	0	0	-242.409	-7.9213	1.28345e-17	1.22804e-15
LDB2	70.5568	32.8792	38.6521	51.0112	47.9809	1.70336	2.72933	1.89009	2.75747	1.82973	-19.8641	-4.31209	1.30856e-17	1.23795e-15
MMRN1	0	0	0	1856.61	2076.76	0.340673	0.0941147	0	0.551495	0	-3408.42	-11.7349	1.3653e-17	1.28356e-15
CORIN	1.23784	0	0	0.249443	0.230124	38.1554	60.8922	28.0363	83.386	21.5908	158.678	7.30996	1.38773e-17	1.29654e-15
TLR4	4.95136	12.5254	17.2917	134.325	133.587	0	0.282344	0	0.110299	0	-437.768	-8.77402	1.63308e-17	1.51635e-15
FAP	0	1.56568	1.01716	0	0	102.202	50.7278	85.6839	59.6717	72.0914	544.932	9.08993	1.78118e-17	1.64371e-15
IL1RL1	0	0	0	2207.95	1568.18	0	0.188229	0.315014	0.441196	0.731892	-2102.52	-11.0379	2.07473e-17	1.90294e-15
THSD7A	37.1352	57.93	70.1841	18.2094	18.2949	0.681346	0	0	0	1.46378	-119.633	-6.90247	2.53498e-17	2.31098e-15
SV2A	1.23784	0	2.03432	0.124722	0	68.4753	22.117	65.838	23.2731	62.9427	160.433	7.32582	2.55999e-17	2.31972e-15
PLCG2	123.784	72.0211	69.167	7.23386	5.86817	0	0	0	0.330897	0.731892	-250.222	-7.96707	2.81433e-17	2.53492e-15
ICA1	40.8487	45.4046	35.6006	36.7929	40.0416	0	0	0	0	0.731892	-399.49	-8.64202	3.47898e-17	3.11493e-15
PDE10A	18.5676	17.2224	14.2403	60.9889	71.3386	0	0.188229	0.315014	0	0	-286.503	-8.16241	3.95249e-17	3.51795e-15
ABCC3	0	0	0	0.873052	0.690373	25.8911	50.9161	26.4612	63.9734	31.1054	60.4875	5.91857	4.08678e-17	3.61608e-15
IL1R1	0	0	0	6.61025	8.5146	70.5193	233.781	81.5887	250.048	83.0698	38.9589	5.28388	4.16206e-17	3.66115e-15
FOXL1	0	0	0	4.11581	2.76149	45.9908	94.4912	48.5122	91.3275	54.8919	27.3109	4.7714	4.79621e-17	4.19445e-15
GPM6B	0	0	0	1.12249	0.920498	33.7266	41.5987	33.3915	47.2079	36.2287	43.3892	5.43927	5.06949e-17	4.40782e-15
PRR16	0	0	0	0.997773	1.26568	35.0893	35.293	36.5416	40.8106	41.7179	37.2226	5.21811	5.33188e-17	4.60932e-15
PDGFB	17.3297	17.2224	18.3089	71.3408	67.7716	2.38471	0.282344	0.630028	0.220598	0	-60.1023	-5.90935	5.55854e-17	4.7714e-15
PCDH19	264.898	106.466	95.6131	1.62138	1.841	0	0.470574	0	0.330897	0.365946	-331.43	-8.37256	5.58281e-17	4.7714e-15
SIM2	0	1.56568	0	0.997773	1.38075	52.123	34.1636	45.6771	28.4571	47.207	37.5012	5.22886	5.69126e-17	4.80943e-15
PWP2	19.8054	17.2224	20.3432	30.3074	31.9873	0	0.0941147	1.57507	0.220598	0	-82.6321	-6.36863	5.68e-17	4.80943e-15
MAP1A	6.18919	3.13135	6.10297	16.588	26.1191	826.472	103.526	719.177	92.8717	614.423	38.468	5.26559	5.94121e-17	4.99261e-15
LAMA3	44.5622	12.5254	8.13729	35.2962	42.8031	0.340673	0.188229	0.315014	0.110299	0	-142.36	-7.1534	6.29042e-17	5.25669e-15
F11R	19.8054	31.3135	26.4462	215.27	228.859	1.36269	1.50584	3.78017	2.42658	5.48919	-36.4131	-5.18639	6.33299e-17	5.26303e-15
SLC38A5	0	0	0	7.10913	9.20498	150.577	73.6918	163.492	70.481	111.248	27.6799	4.79077	6.93684e-17	5.73319e-15
CPE	424.579	428.995	486.203	0.374165	0.690373	0.681346	1.31761	1.26006	1.10299	1.09784	-238.468	-7.89765	7.00649e-17	5.7591e-15
EDNRB	188.152	89.2435	93.5788	5.11359	3.3368	0	0	0.630028	0	0	-604.546	-9.23971	9.26454e-17	7.57376e-15
EYA4	0	0	0	0.374165	0.115062	42.9248	26.8227	45.6771	31.4352	68.4319	185.35	7.53411	1.05977e-16	8.61678e-15
MYEF2	180.724	259.902	225.81	88.0535	87.2171	6.81346	16.6583	5.98527	18.7508	9.5146	-14.161	-3.82385	1.11117e-16	8.98615e-15
ANGPT2	1.23784	0	3.05148	402.352	370.04	0.340673	0.282344	0	0.441196	0.365946	-490.062	-8.93682	1.25329e-16	1.00813e-14
SH3TC1	12.3784	21.9195	25.429	56.3742	59.7173	0.681346	0.282344	0.630028	1.21329	1.82973	-40.2768	-5.33188	1.35563e-16	1.08465e-14
NOVA2	76.746	78.2838	68.1498	42.6548	42.8031	0	0	0	0	0.365946	-954.489	-9.89858	1.40796e-16	1.12056e-14
PTGS1	12.3784	4.69703	5.08581	23.9466	44.9893	623.431	278.391	686.416	338.397	758.972	27.8629	4.80027	1.51549e-16	1.19979e-14
TEAD3	1.23784	0	1.01716	0.124722	0.115062	51.1009	22.8699	54.1824	24.8173	39.5222	153.07	7.25804	2.03477e-16	1.60247e-14
HAS2	0	0	0	0.249443	0.230124	10.5609	342.86	14.4907	316.668	12.8081	708.739	9.46911	2.22093e-16	1.73996e-14
NTN4	3.71352	3.13135	3.05148	385.515	391.672	1.02202	0.752918	1.57507	0.441196	0.365946	-186.145	-7.54028	2.26056e-16	1.76183e-14
HS3ST3B1	0	0	0	0.623608	0.575311	25.8911	49.5984	26.7762	53.8259	20.127	68.6001	6.10014	2.52217e-16	1.95559e-14
DUSP6	196.816	155.002	189.192	211.528	186.056	5.45077	21.6464	7.56034	22.1701	6.58703	-14.3445	-3.84242	2.85207e-16	2.20005e-14
CHRM2	0	0	0	0.124722	0	94.7071	113.785	97.0244	120.777	106.124	1386.79	10.4375	3.306e-16	2.53719e-14
HIF3A	0	0	0	0.74833	0.805435	39.5181	28.5168	32.1314	34.5236	34.7649	47.4633	5.56874	4.04124e-16	3.0857e-14
GRAP	34.6595	46.9703	44.7551	14.8419	14.728	0	0.0941147	0	0.110299	0.365946	-226.833	-7.82549	4.07672e-16	3.09707e-14
GLIS3	0	0	0	0.873052	1.26568	45.9908	44.5163	35.2816	47.4285	19.3951	42.6985	5.41611	4.2454e-16	3.20901e-14
LXN	147.303	84.5465	58.9953	99.1537	76.9766	8.8575	9.97616	6.30028	8.27242	10.2465	-10.5407	-3.39789	4.57611e-16	3.44169e-14
TNFAIP2	43.3244	40.7076	61.0297	27.6882	17.2593	0.681346	2.16464	1.89009	0.661793	0.365946	-29.5053	-4.8829	4.98262e-16	3.72879e-14
PPP1R16B	49.5136	50.1016	50.8581	51.2606	55.46	0	0.0941147	0	0	0	-855.445	-9.74053	5.61602e-16	4.18199e-14
DIP2C	16.0919	20.3538	12.2059	5.36303	6.32842	106.971	95.0558	105.845	97.063	94.78	13.7411	3.78042	5.64738e-16	4.18463e-14
EIF2S3B	144.827	84.5465	93.5788	3.11804	2.30124	0	0.282344	0	0.110299	0	-480.228	-8.90758	5.9209e-16	4.36579e-14
PRRX1	0	1.56568	0	4.11581	3.10668	73.5853	74.633	68.0431	75.665	83.8016	23.4141	4.5493	8.38978e-16	6.15605e-14
DSP	0	0	0	0	0.115062	114.125	98.3499	114.98	100.041	84.8995	1319.17	10.3654	8.47371e-16	6.15757e-14
DUSP4	17.3297	31.3135	41.7036	127.84	167.646	0	0.0941147	0	0	0	-1319.98	-10.3663	8.43332e-16	6.15757e-14
ARHGAP27	63.1298	54.7986	56.961	23.8218	27.1547	2.72538	1.03526	2.52011	1.32359	3.29351	-21.9786	-4.45803	8.71268e-16	6.30077e-14
IL11	0	0	0	0.623608	0.690373	31.3419	37.1753	29.9263	35.0751	21.9568	53.4811	5.74096	8.85602e-16	6.37379e-14
PFKFB4	2.47568	3.13135	1.01716	1.87082	1.72593	49.7382	41.9752	44.102	44.3402	29.2757	22.6459	4.50118	1.23959e-15	8.879e-14
SLITRK5	0	0	0	0.249443	0	54.167	31.9049	56.3875	38.0531	112.711	456.072	8.83312	1.29088e-15	9.20259e-14
PITPNM3	0	0	2.03432	2.8686	2.30124	35.7707	55.9982	46.3071	54.9289	44.6454	20.7983	4.3784	1.40833e-15	9.99251e-14
PODXL	68.0811	62.627	65.0983	1601.68	1901.06	7.4948	17.7877	5.67026	15.3315	2.56162	-75.1283	-6.23128	1.50839e-15	1.06316e-13
SEMA6B	24.7568	51.6673	28.4805	75.0824	89.9786	0	0	0	0.110299	0	-898.091	-9.81072	1.51253e-15	1.06316e-13
ARRB1	136.162	241.114	225.81	78.2005	82.3845	7.4948	1.12938	15.1207	1.21329	6.58703	-24.5778	-4.61928	1.66606e-15	1.16562e-13
NOTCH4	372.59	277.125	275.651	53.2561	49.8219	8.51682	14.4937	9.76544	12.5741	10.2465	-18.2639	-4.19092	2.00513e-15	1.39635e-13
C14orf132	0	0	0	0.249443	0	67.1126	28.1403	67.7281	31.5455	89.2908	441.052	8.7848	2.11877e-15	1.46869e-13
MRAS	4.95136	1.56568	1.01716	2.8686	2.41631	49.0569	53.6454	49.7722	54.9289	40.986	19.3391	4.27345	2.3613e-15	1.62929e-13
TNFRSF19	0	0	0	3.74165	2.99162	204.404	11.2938	173.888	13.6771	251.405	75.976	6.24747	2.51768e-15	1.72927e-13
TFEC	6.18919	6.2627	9.15445	100.401	113.106	0.340673	0	0.315014	0	0	-386.683	-8.59501	2.58596e-15	1.76809e-13
PTPN13	0	0	0	0	0.115062	163.864	42.3516	144.277	40.8106	212.249	1592.05	10.6367	2.71769e-15	1.84142e-13
gene:ENSG00000277758	0	0	0	0.873052	0.575311	26.5725	70.0213	23.6261	73.4591	13.1741	72.8864	6.18758	2.71755e-15	1.84142e-13
TAL1	25.9946	18.7881	17.2917	37.2918	38.6609	0.681346	0	0	0	0	-293.013	-8.19482	2.84054e-15	1.90748e-13
NUPR1	0	0	0	0.124722	0.345187	55.189	16.5642	52.9224	21.6186	38.7903	163.399	7.35226	2.83165e-15	1.90748e-13
HOXB8	33.4217	64.1927	83.4072	8.23163	9.89535	0.681346	1.12938	0.630028	0.661793	0.365946	-51.5869	-5.68893	3.19461e-15	2.1357e-13
RAMP2	71.7947	95.5062	104.768	2.8686	2.99162	0	0.658803	0.630028	0.330897	0	-144.993	-7.17984	3.29813e-15	2.19515e-13
SMOC1	0	0	0	0	0.115062	179.535	41.1281	171.683	35.5162	195.049	1647.69	10.6862	3.71145e-15	2.45937e-13
FGF7	0	0	1.01716	0.249443	0.345187	20.781	24.3757	25.8312	25.2584	50.8665	85.8176	6.4232	4.00086e-15	2.63952e-13
BMPR1A	0	0	0	2.74388	2.41631	40.1994	65.3156	41.5819	61.3262	42.8157	23.9982	4.58486	4.82197e-15	3.16734e-13
DOCK11	0	0	0	1.37194	0.690373	55.189	18.4465	49.4572	17.8684	53.7941	48.0153	5.58542	4.93735e-15	3.22903e-13
CPNE8	60.6541	34.4449	45.7723	41.657	42.3429	0	0	0	0.110299	0	-694.425	-9.43968	4.98132e-15	3.24368e-13
ZNF423	133.687	147.173	142.403	0.74833	0.345187	0.340673	0	0	0.220598	0	-618.175	-9.27187	5.19065e-15	3.36542e-13
JAG2	29.7081	17.2224	22.3775	103.145	108.043	1.70336	0.941147	4.09518	0.772092	2.92757	-28.4131	-4.82849	5.49721e-15	3.54889e-13
MMP19	7.42703	6.2627	2.03432	1.99555	1.72593	57.9144	40.8458	67.7281	38.0531	56.7216	20.4656	4.35513	5.71588e-15	3.67429e-13
SERPINB9	19.8054	7.82838	12.2059	109.007	127.949	0.340673	1.41172	0	1.54418	1.82973	-51.6688	-5.69122	5.95639e-15	3.81259e-13
XYLT1	0	0	0	0.124722	0	57.233	173.359	67.413	176.258	38.7903	1341.29	10.3894	7.6697e-15	4.88846e-13
FLT4	125.022	108.032	119.008	9.60357	7.24892	0	0	0	0.110299	0	-1233.22	-10.2682	7.71954e-15	4.89947e-13
ANTXR1	18.5676	20.3538	25.429	17.8352	15.9936	140.017	227.758	139.551	239.569	174.556	9.84972	3.30008	1.077e-14	6.8068e-13
SLC2A10	0	0	0	4.11581	3.91211	85.8496	66.5391	80.6436	60.7747	81.24	22.0456	4.46242	1.35518e-14	8.52912e-13
FOXO1	40.8487	54.7986	73.2356	64.98	63.7445	4.76942	4.79985	6.93031	6.39734	5.48919	-11.207	-3.48633	1.40374e-14	8.79792e-13
SIX1	0	0	0	0.873052	2.07112	21.1217	58.5393	27.7212	72.9076	28.1778	38.0464	5.24969	1.63057e-14	1.01772e-12
FN1	1669.84	1216.53	1312.14	4528.89	6514.94	86364.3	62886.7	88022.5	67250.8	80309.1	25.2345	4.65732	1.75474e-14	1.09069e-12
KIAA1671	3.71352	7.82838	6.10297	68.3475	85.2611	0.340673	0.0941147	0	0	0.365946	-225.999	-7.82017	1.94642e-14	1.20486e-12
TMC6	12.3784	10.9597	12.2059	29.0601	26.9246	0	0.282344	0	0.441196	0.365946	-66.6324	-6.05815	2.45354e-14	1.51255e-12
MFNG	17.3297	25.0508	29.4977	66.3519	68.3469	0	0	0	0.110299	0	-694.318	-9.43945	2.56667e-14	1.57583e-12
ADPRHL1	0	0	0	0.997773	0.690373	33.0453	32.4696	34.9666	28.5674	12.4422	39.5569	5.30586	2.74965e-14	1.68131e-12
LRRC17	0	0	0	2.74388	2.64643	29.2979	65.2215	30.5564	70.5913	35.1308	23.7644	4.57073	2.90689e-14	1.77026e-12
NRK	0	0	0	3.24276	5.1778	55.8704	80.8445	72.1383	76.6577	85.6314	21.4273	4.42138	3.9491e-14	2.39525e-12
CCM2L	96.5514	104.9	103.75	3.49221	3.56693	0	0	0	0	0.365946	-855.203	-9.74012	4.17884e-14	2.52442e-12
MOXD1	0	0	0	0.374165	0.115062	21.4624	31.5284	19.8459	32.3176	27.8119	116.22	6.86071	4.6714e-14	2.81069e-12
ITGA1	4.95136	1.56568	3.05148	20.4544	19.3304	148.874	300.696	119.075	330.897	104.295	18.514	4.21054	4.79651e-14	2.87447e-12
SAMD9L	44.5622	93.9405	76.2871	145.8	138.88	11.9236	11.9526	11.6555	11.3608	10.9784	-8.7889	-3.13568	4.88678e-14	2.91694e-12
RND1	86.6487	32.8792	47.8066	7.73274	5.29286	0.681346	0.0941147	0.945043	0.110299	0.731892	-76.5705	-6.25872	5.1431e-14	3.05781e-12
LAMA1	0	0	0	0.124722	0	74.948	68.0449	79.6986	72.9076	65.5043	923.716	9.85131	5.43028e-14	3.21584e-12
NMNAT2	101.503	61.0613	85.4415	1.87082	1.49581	0.340673	0.282344	0	0.661793	0.365946	-133.617	-7.06196	6.33608e-14	3.73754e-12
EVA1C	25.9946	26.6165	14.2403	19.2071	22.4371	0.340673	0.752918	0.945043	0.772092	1.09784	-26.296	-4.71677	6.95462e-14	4.08639e-12
CELF2	17.3297	7.82838	10.1716	21.2027	28.0752	0.681346	0.282344	0	0.220598	0	-67.5227	-6.0773	7.28244e-14	4.26235e-12
ZDHHC13	74.2703	78.2838	72.2184	150.539	167.3	12.9456	11.482	15.4357	11.1402	14.6378	-8.54006	-3.09425	7.47008e-14	4.35523e-12
APPL2	12.3784	20.3538	19.3261	20.8285	19.9058	157.05	173.548	138.606	171.184	140.157	7.97687	2.99582	9.03622e-14	5.24799e-12
RASIP1	216.622	294.347	329.56	89.176	100.219	0	0	0	0	0	-7655.11	-12.9022	9.53191e-14	5.51458e-12
PHLDB2	162.157	150.305	142.403	140.686	147.97	27.2538	16.6583	23.3111	16.6551	9.88054	-7.98983	-2.99816	1.01657e-13	5.85873e-12
SDC3	6.18919	9.39405	4.06864	23.6971	26.9246	273.22	155.666	242.876	166.331	198.343	13.3421	3.73792	1.0886e-13	6.22615e-12
SMIM3	0	1.56568	5.08581	1.62138	1.15062	29.9792	28.705	42.2119	32.9794	57.8195	23.5624	4.55842	1.08761e-13	6.22615e-12
GNG2	2.47568	1.56568	3.05148	0.498887	0.920498	24.1878	23.0581	34.0215	28.8983	39.8881	29.401	4.87779	1.13358e-13	6.45886e-12
GPC6	1.23784	0	0	0	0	58.2551	61.1746	49.4572	67.6132	79.7762	810.091	9.66194	1.27564e-13	7.24082e-12
DMTN	28.4703	15.6568	19.3261	14.4677	15.4183	0.340673	0.282344	0.945043	0.551495	0.731892	-30.686	-4.93951	1.36148e-13	7.69902e-12
PREX1	133.687	42.2732	53.9095	132.454	149.236	10.5609	7.34095	17.3258	4.96345	7.31892	-10.9919	-3.45836	1.40333e-13	7.90595e-12
DISP2	115.119	90.8092	121.042	1.12249	1.61087	0	0.752918	0	0.99269	1.09784	-106.706	-6.7375	1.43827e-13	8.07256e-12
PTGFR	0	1.56568	0	0.873052	1.15062	38.496	16.9406	45.9921	16.2139	41.3519	34.684	5.1162	1.72822e-13	9.66392e-12
TAGLN	2.47568	0	0	37.7907	47.1755	942.642	899.642	919.526	973.278	545.626	47.5748	5.57213	1.99929e-13	1.11383e-11
CD200	91.6001	57.93	48.8237	2.36971	4.2573	0	0.282344	0	0	0	-367.24	-8.52058	2.20365e-13	1.22315e-11
TLR3	24.7568	40.7076	22.3775	8.35635	5.75311	0.340673	0.0941147	0	0.110299	0.365946	-110.473	-6.78755	2.5535e-13	1.41212e-11
NEDD4L	53.2271	50.1016	43.7379	76.0802	74.6754	6.13211	5.92923	8.19037	4.85315	4.02541	-10.8107	-3.43438	2.57195e-13	1.41711e-11
TUB	0	0	0	0.249443	0	31.6826	41.5987	25.2011	45.1123	24.1524	262.968	8.03874	2.60599e-13	1.43063e-11
PRXL2A	0	1.56568	2.03432	357.203	370.27	1.02202	0.752918	1.89009	0.330897	1.09784	-142.375	-7.15355	2.67337e-13	1.46229e-11
AKR1C2	1.23784	0	0	0	0	82.7835	12.7055	104.27	14.2286	110.516	665.73	9.37879	2.70619e-13	1.47487e-11
NEFL	53.2271	209.8	241.067	0.124722	0.115062	0.340673	0.188229	0.945043	0.661793	0	-221.007	-7.78795	2.88851e-13	1.56855e-11
PREX2	170.822	205.103	180.038	127.216	120.355	0	0	0	0	0	-5892.95	-12.5248	2.95339e-13	1.59802e-11
PLCB1	64.3676	67.324	55.9439	67.1003	70.0729	9.53884	7.24683	9.76544	5.73554	7.68487	-9.14445	-3.1929	2.99847e-13	1.61659e-11
SOX18	37.1352	48.5359	58.9953	12.2227	14.843	0	0	0.315014	0	0	-518.082	-9.01704	3.01429e-13	1.61932e-11
GFRA1	0	0	0	0	0.115062	62.3431	74.633	55.4425	67.3926	35.8627	770.081	9.58887	3.1461e-13	1.68412e-11
PELI1	56.9406	75.1524	65.0983	43.6526	52.6985	4.42875	6.21157	5.04023	5.40465	5.12324	-10.0578	-3.33024	3.18905e-13	1.70105e-11
CCDC80	0	0	0	45.0245	51.5479	1539.16	2006.9	1428.59	1956.15	771.414	78.2687	6.29036	3.47574e-13	1.84742e-11
SPNS2	54.4649	81.4151	115.956	6.85969	6.0983	0	0	0	0.110299	0	-883.512	-9.78711	3.48984e-13	1.84838e-11
PXYLP1	0	0	0	0.623608	0.690373	31.6826	14.776	31.8164	15.883	30.3735	42.9356	5.4241	3.54238e-13	1.86584e-11
PKP2	21.0433	9.39405	9.15445	31.0557	35.8994	0	0	0	0.220598	0	-235.026	-7.87668	3.5476e-13	1.86584e-11
SEMA7A	11.1406	9.39405	6.10297	2.24499	3.45187	48.7162	236.04	57.9626	234.275	31.4714	20.451	4.3541	3.75414e-13	1.96759e-11
SAMD11	0	0	0	0.623608	0.690373	32.3639	19.0112	29.6113	19.0817	18.2973	39.9045	5.31848	4.29422e-13	2.24283e-11
LRRC8B	44.5622	37.5762	42.7208	83.4388	78.4724	7.15413	4.61162	4.4102	5.84584	6.58703	-10.6287	-3.40989	4.57829e-13	2.38293e-11
LYN	16.0919	17.2224	24.4119	55.5011	47.5207	2.04404	1.59995	2.83513	1.98538	0.365946	-18.5754	-4.21532	6.00918e-13	3.1169e-11
FERMT3	4.95136	0	1.01716	202.049	193.65	0.681346	1.22349	0.315014	0.661793	0	-128.88	-7.00988	6.27279e-13	3.24245e-11
ZNF415	0	0	0	0.997773	0.690373	18.3963	28.705	16.0657	27.9056	25.9822	32.2306	5.01036	6.62403e-13	3.41228e-11
RUNX2	0	3.13135	5.08581	0	0	27.9352	30.3049	35.5966	30.8837	34.033	79.8385	6.31901	7.20619e-13	3.69951e-11
SH3BP5	258.708	165.962	209.535	176.481	184.56	28.6165	22.7758	30.5564	24.1555	23.4205	-7.71581	-2.94782	7.72134e-13	3.95049e-11
FKBP1C	69.319	86.1121	75.2699	1.12249	2.07112	0.340673	0	0	0.551495	0.731892	-137.351	-7.10173	7.79226e-13	3.97326e-11
DOCK9	76.746	114.294	77.3042	217.639	233.001	13.2862	17.4112	17.6408	15.883	10.9784	-9.6141	-3.26515	8.0882e-13	4.11023e-11
LTC4S	149.779	115.86	132.231	0	0	0	0.0941147	0.315014	0.110299	0	-602.927	-9.23584	8.15247e-13	4.12894e-11
IRS2	0	0	0	13.2205	11.7363	87.8936	182.583	89.149	189.604	84.8995	22.5601	4.4957	9.72942e-13	4.91107e-11
SEMA3B	0	0	0	0.374165	0.115062	33.0453	13.1761	30.2414	15.2212	22.3227	97.9788	6.6144	9.91419e-13	4.9876e-11
BTBD11	16.0919	37.5762	27.4634	6.98441	5.75311	0.340673	0.282344	0.315014	0.220598	0.365946	-56.5911	-5.8225	1.02727e-12	5.15072e-11
MMRN2	12.3784	10.9597	2.03432	244.33	277.99	3.7474	0.0941147	0.630028	0.551495	3.29351	-67.0549	-6.06727	1.07051e-12	5.34969e-11
ST3GAL5	7.42703	14.0911	11.1888	20.0802	19.2154	0.340673	0.847032	0.630028	0.551495	0.731892	-23.988	-4.58424	1.10104e-12	5.47865e-11
EXOC3L1	53.2271	36.0105	51.8752	5.48775	4.14224	0	0	0	0.110299	0.365946	-286.852	-8.16416	1.1036e-12	5.47865e-11
FAM43A	86.6487	53.233	54.9267	134.325	138.765	9.53884	1.88229	8.19037	2.20598	13.906	-13.5411	-3.75927	1.28075e-12	6.33718e-11
SSPN	0	0	0	0.997773	1.26568	21.8031	25.8815	23.6261	30.0013	21.2249	25.0738	4.64811	1.43595e-12	7.08182e-11
PGF	4.95136	3.13135	7.12013	93.1671	96.3071	0.340673	1.03526	0.315014	1.10299	1.09784	-50.1416	-5.64794	1.45521e-12	7.15337e-11
KANK3	14.8541	10.9597	24.4119	9.10468	12.7719	1.02202	0.282344	0.315014	0.220598	0.365946	-35.1202	-5.13423	1.46069e-12	7.15691e-11
ATP8A1	39.6108	79.8494	81.3729	2.99332	1.61087	0.340673	0.376459	0.945043	0.551495	0.731892	-67.7039	-6.08117	1.5035e-12	7.34274e-11
SYTL2	4.95136	0	2.03432	1.37194	0.805435	37.474	22.8699	33.3915	23.1628	26.3481	21.2575	4.4099	1.60915e-12	7.8333e-11
CCBE1	2.47568	0	2.03432	18.3341	17.8346	91.3003	478.479	90.0941	433.364	88.5589	27.0263	4.75629	1.73389e-12	8.41328e-11
GRK5	65.6055	97.0719	81.3729	48.5167	64.4348	9.87951	3.29401	10.0805	2.75747	9.88054	-10.2808	-3.36187	1.9204e-12	9.28833e-11
CTHRC1	0	0	0	35.7951	27.73	425.16	483.655	429.679	529.214	357.163	33.8606	5.08154	1.96435e-12	9.47042e-11
PDZD2	23.5189	18.7881	21.3604	7.35858	7.47904	0.340673	0.470574	0	0.220598	0.365946	-43.9984	-5.45938	1.98031e-12	9.51689e-11
SOX7	6.18919	0	1.01716	81.4432	84.4556	0	0.0941147	0.315014	0.220598	0	-218.929	-7.77432	2.08136e-12	9.97063e-11
RAPGEF3	50.7514	92.3748	89.5102	12.2227	13.4623	2.38471	1.22349	4.72521	1.98538	2.56162	-20.0645	-4.32657	2.13787e-12	1.02088e-10
DUSP10	4.95136	17.2224	5.08581	2.8686	2.07112	60.6398	53.7395	53.2374	53.0538	41.7179	15.483	3.95261	2.18156e-12	1.03845e-10
SVEP1	0	0	0	0	0.115062	42.5841	50.3514	34.6516	63.6425	35.4968	592.5	9.21067	2.25627e-12	1.07063e-10
FES	127.497	139.345	146.471	32.1782	31.412	8.8575	5.08219	8.8204	6.61793	11.7103	-11.579	-3.53343	2.38733e-12	1.12925e-10
ST6GAL1	1.23784	3.13135	10.1716	68.5969	72.3741	0.340673	0.376459	0.315014	0.772092	0	-75.5887	-6.2401	2.41332e-12	1.13797e-10
TENM4	0	0	0	0	0.115062	49.7382	33.5048	53.8674	33.9721	65.1384	606.292	9.24387	2.42653e-12	1.14062e-10
GREB1L	19.8054	15.6568	13.2231	14.5924	16.4539	0	0.188229	0	0	0	-161.552	-7.33585	2.55511e-12	1.19732e-10
LPAR1	2.47568	0	1.01716	24.196	24.1631	183.282	209.97	215.785	210.34	200.538	18.215	4.18705	2.56392e-12	1.19772e-10
SCG2	80.4595	173.79	128.162	0.124722	0.115062	0.340673	0.282344	0.945043	0.661793	0	-160.063	-7.3225	2.71187e-12	1.26291e-10
EIF5AL1	90.3622	92.3748	93.5788	0.623608	0.690373	0.340673	0.376459	0.315014	1.10299	0.365946	-100.817	-6.65559	2.75654e-12	1.27975e-10
TSPYL5	0	0	0	0.74833	1.26568	19.759	23.3404	25.2011	20.295	22.6887	24.3	4.60288	2.79827e-12	1.29231e-10
PAMR1	0	0	0	0.124722	0.460249	19.4184	16.8465	21.106	18.3096	24.5184	67.1253	6.06878	2.80078e-12	1.29231e-10
SEMA3F	321.838	358.54	437.379	160.143	213.786	40.5401	35.9518	41.2669	32.9794	28.5438	-8.2589	-3.04595	2.89177e-12	1.32336e-10
DOCK8	82.9352	50.1016	48.8237	2.24499	2.76149	0	0.0941147	0	0.110299	0	-424.198	-8.7286	2.89446e-12	1.32336e-10
GSE1	13.6162	12.5254	22.3775	16.0891	11.7363	115.488	90.9148	105.845	98.9381	111.979	7.15471	2.83889	2.88298e-12	1.32336e-10
FIBCD1	0	0	0	0.74833	0.230124	24.5284	13.929	29.2963	14.5595	20.127	46.6181	5.54282	3.12027e-12	1.42228e-10
ELAPOR2	2.47568	0	0	155.777	128.409	0.340673	0	0.630028	0.110299	0	-253.167	-7.98395	3.25374e-12	1.47863e-10
APOE	0	0	0	1.49666	2.64643	40.8807	16.5642	77.1785	30.7734	19.7611	26.073	4.70448	3.29082e-12	1.49098e-10
MLPH	0	0	0	0.124722	0	29.2979	92.9853	31.5014	95.96	21.2249	710.356	9.4724	3.42098e-12	1.54529e-10
LYVE1	53.2271	120.557	147.488	104.641	108.964	0	0	0	0	0	-3995.53	-11.9642	3.49748e-12	1.57512e-10
SLC6A15	0	0	0	4.48998	4.2573	42.5841	63.151	47.2521	65.9587	45.7433	15.3272	3.93802	3.6088e-12	1.61885e-10
PSG5	0	0	0	0	0.230124	26.2318	66.3509	22.996	51.7302	6.95298	283.566	8.14754	3.6161e-12	1.61885e-10
MMP10	0	1.56568	0	187.082	151.997	0.681346	0	0.315014	0	0	-331.313	-8.37205	3.66353e-12	1.63522e-10
CRLF1	1.23784	0	5.08581	1.7461	1.26568	62.3431	16.8465	62.6878	16.986	46.1092	22.3955	4.48513	4.20536e-12	1.87151e-10
COL5A3	1.23784	0	2.03432	0.374165	0.575311	135.588	1.69406	123.486	2.64717	71.7254	84.0944	6.39394	4.31932e-12	1.91655e-10
CDC42EP2	29.7081	29.7478	45.7723	42.7795	37.6253	5.11009	2.72933	2.83513	1.54418	0	-16.0037	-4.00033	4.34156e-12	1.92076e-10
SYNPO	240.141	108.032	123.076	201.051	239.905	16.3523	28.2344	15.4357	30.1116	6.58703	-9.3123	-3.21914	4.70894e-12	2.07718e-10
ZFHX4	0	0	0	11.4744	13.2322	123.324	95.8088	100.805	86.8052	90.7546	17.5318	4.1319	4.96178e-12	2.18231e-10
NREP	33.4217	40.7076	39.6693	60.2406	71.7988	680.664	427.469	645.779	476.712	369.24	10.1426	3.34235	5.00496e-12	2.19489e-10
ENPP4	22.2811	15.6568	24.4119	7.85746	5.63805	0.681346	0.0941147	0.315014	0	0.365946	-63.0038	-5.97737	5.06609e-12	2.21524e-10
TMTC2	14.8541	32.8792	19.3261	5.11359	9.20498	0.681346	0.376459	0.315014	0.330897	0	-40.6107	-5.34379	5.18137e-12	2.25908e-10
LMOD1	0	0	0	0.498887	0.230124	76.6514	5.17631	57.3326	4.74285	36.9606	123.545	6.9489	5.22966e-12	2.27354e-10
SAMD5	55.7028	56.3643	78.3214	3.36748	6.0983	0	0.0941147	0	0	0	-684.453	-9.41881	5.46576e-12	2.36934e-10
TTC9	51.9892	79.8494	82.3901	0.498887	0.345187	0	0.188229	0.315014	0.110299	0	-272.291	-8.08901	5.49396e-12	2.37471e-10
LRP3	0	0	1.01716	0.997773	0.920498	28.6165	19.4817	23.3111	19.8538	17.1995	23.4616	4.55223	5.75262e-12	2.4794e-10
ACTA1	115.119	84.5465	101.716	0.124722	0	0.340673	0	0	0	0.365946	-422.925	-8.72426	5.83155e-12	2.50623e-10
NRG1	225.287	173.79	140.368	95.7862	111.38	19.0777	27.6697	21.106	25.479	12.0762	-6.88519	-2.7835	6.05326e-12	2.5941e-10
ACKR3	367.638	375.762	459.757	2.24499	0.460249	0	0	0	0	0	-9045.65	-13.143	6.28173e-12	2.68437e-10
CPA4	0	0	0	0	0.345187	39.1774	15.0584	32.4465	15.9933	13.906	131.493	7.03885	6.75983e-12	2.88049e-10
FAM13A	0	0	0	4.48998	2.41631	48.7162	40.4693	48.5122	38.8252	46.1092	14.8136	3.88885	6.80018e-12	2.8895e-10
RGS5	0	0	0	963.35	992.296	2.04404	1.41172	1.89009	2.20598	2.56162	-191.295	-7.57966	7.16521e-12	3.03603e-10
PKN3	92.8379	120.557	134.265	22.2005	20.8263	8.17615	3.48224	8.50538	2.64717	4.7573	-14.2005	-3.82787	8.00612e-12	3.38281e-10
FUCA1	80.4595	61.0613	60.0125	16.7127	14.728	1.70336	1.41172	4.72521	1.43389	3.65946	-18.229	-4.18816	8.63286e-12	3.63741e-10
OBSL1	0	0	0	3.61693	4.37236	66.0905	23.9051	63.9479	25.1482	67.3341	19.8312	4.3097	9.20353e-12	3.86702e-10
FGF2	0	1.56568	0	15.9644	17.3744	84.8276	362.53	80.6436	376.23	68.4319	26.0596	4.70374	1.04274e-11	4.36903e-10
DAPK1	1.23784	0	1.01716	106.138	118.054	0	0.0941147	0	0.110299	0	-557.927	-9.12393	1.24297e-11	5.19353e-10
CEBPB	13.6162	15.6568	16.2746	6.11136	8.16942	81.0802	64.3745	85.9989	82.7242	72.8233	8.56475	3.09841	1.25822e-11	5.24268e-10
BICC1	0	0	0	0	0.115062	28.2759	51.5749	30.5564	51.1787	32.5692	508.723	8.99074	1.32071e-11	5.48787e-10
SHANK2	0	1.56568	2.03432	0	0.115062	15.3303	20.8935	21.736	25.2584	10.9784	76.8833	6.2646	1.32933e-11	5.50849e-10
NR3C2	4.95136	10.9597	8.13729	19.0824	20.7112	0	0.282344	0.945043	0.110299	0.731892	-37.9098	-5.2445	1.44235e-11	5.96039e-10
MYPN	0	0	0	0.74833	0.690373	24.8691	24.7522	27.0912	23.3834	5.48919	35.5282	5.15089	1.50137e-11	6.18727e-10
INHBB	185.676	122.123	92.5617	0.124722	0	0	0	0	0.110299	0	-1419.13	-10.4708	1.57001e-11	6.44937e-10
DHH	17.3297	37.5762	37.635	11.3497	10.2405	0	0	0	0	0.365946	-340.242	-8.41042	1.57354e-11	6.44937e-10
C6orf132	0	0	0	0.249443	0	20.781	19.3876	24.8861	21.9495	21.2249	163.442	7.35264	1.60241e-11	6.54986e-10
S1PR2	0	0	2.03432	0.374165	0.460249	23.5064	9.22324	23.3111	14.1183	31.4714	38.9509	5.28358	1.73778e-11	7.08394e-10
KCNMA1	0	0	0	8.23163	8.62966	103.224	62.5863	120.65	65.1867	43.1816	18.8499	4.23648	1.76683e-11	7.18289e-10
GAD2	191.865	144.042	97.6475	0	0	0	0	0	0.110299	0	-1547.83	-10.596	1.90989e-11	7.74356e-10
KRT20	89.1244	106.466	139.351	0	0	0	0	0.315014	0	0	-855.689	-9.74094	1.91982e-11	7.76289e-10
GCH1	34.6595	36.0105	24.4119	14.0935	11.046	1.02202	1.59995	0.945043	1.10299	0	-21.032	-4.39451	1.9484e-11	7.85732e-10
OLFML2A	0	0	0	0.124722	0	48.7162	21.364	57.0176	23.2731	40.2541	490.709	8.93873	1.9666e-11	7.90951e-10
PLK2	986.558	648.19	751.682	416.57	394.548	74.6074	40.4693	82.5337	43.6784	74.2871	-10.1526	-3.34378	2.21736e-11	8.89429e-10
CD9	147.303	79.8494	99.6818	913.461	998.855	39.1774	14.0231	39.0618	13.5668	19.7611	-17.8904	-4.16112	2.37319e-11	9.49401e-10
DACH2	0	0	0	0.124722	0	52.4636	18.2583	41.5819	19.6332	61.113	498.757	8.96219	2.40083e-11	9.57912e-10
TICAM2	0	0	0	1.99555	2.64643	25.5505	43.7633	27.4062	42.4651	23.4205	17.666	4.1429	2.53634e-11	1.0093e-09
CCNYL1	189.389	183.184	180.038	121.728	111.84	20.4404	28.2344	21.421	34.7442	16.1016	-6.28636	-2.65223	2.57883e-11	1.0235e-09
NOSTRIN	18.5676	29.7478	24.4119	6.11136	3.68199	0.681346	0.0941147	0.315014	0.110299	0.365946	-57.3416	-5.84151	2.59654e-11	1.02782e-09
SWAP70	618.919	458.743	397.71	684.348	661.262	61.3211	77.1741	61.1128	72.2458	61.113	-8.46507	-3.08152	2.8338e-11	1.11879e-09
APBB1IP	175.773	97.0719	100.699	0.124722	0	0	0.0941147	0	0	0	-1386.77	-10.4375	3.05549e-11	1.20316e-09
PGAP4	0	1.56568	0	0	0	41.2214	21.5523	49.4572	21.7289	41.7179	431.898	8.75455	3.08864e-11	1.21304e-09
PALMD	0	0	0	205.666	203.085	0	0	0	0.110299	0	-1495.18	-10.5461	3.33922e-11	1.30803e-09
SHE	40.8487	57.93	50.8581	125.595	135.658	0	0	0	0	0	-3112.19	-11.6037	3.34861e-11	1.30831e-09
ARHGAP6	47.0379	56.3643	57.9782	3.11804	2.53137	1.02202	0.282344	0.630028	0.441196	1.09784	-48.787	-5.60842	3.52395e-11	1.37325e-09
MYH11	64.3676	70.4554	71.2013	0.124722	0.345187	0	0.188229	0.315014	0	0	-318.765	-8.31635	3.56608e-11	1.38607e-09
PLAC8	371.352	186.315	169.866	3.11804	1.26568	0	0	0	0	0	-5481.21	-12.4203	3.61542e-11	1.39802e-09
PMP22	89.1244	90.8092	102.733	141.434	142.217	17.715	4.98808	26.7762	4.63255	6.22108	-9.55274	-3.25591	3.61357e-11	1.39802e-09
FMN2	0	0	0	0.498887	0.345187	11.5829	42.5398	10.0805	35.7368	8.05081	61.426	5.94078	3.83201e-11	1.47798e-09
gene:ENSG00000286190	0	0	0	3.74165	3.91211	84.1462	17.8818	74.3433	16.4345	47.9389	22.0826	4.46484	3.8779e-11	1.48426e-09
LGALS9	13.6162	26.6165	21.3604	6.85969	7.01879	1.02202	0	0	0	0	-94.5128	-6.56244	3.86665e-11	1.48426e-09
ZNF558	1.23784	1.56568	0	0	0.115062	16.693	17.4112	14.8057	17.9787	24.1524	98.3583	6.61997	3.87746e-11	1.48426e-09
BAALC	2.47568	0	0	0.124722	0.460249	36.7927	7.24683	37.4867	6.39734	40.62	55.8017	5.80224	4.40978e-11	1.68355e-09
LYL1	2.47568	7.82838	6.10297	27.1893	27.9601	0	0.0941147	0.315014	0	0.365946	-104.1	-6.70183	4.54245e-11	1.72981e-09
ADCY4	154.73	134.648	144.437	18.4588	15.5334	0	0	0	0	0	-3478.72	-11.7643	4.68847e-11	1.78091e-09
MEIS1	0	0	0	8.48107	8.5146	77.3327	52.4219	74.3433	58.679	70.2616	14.804	3.88791	4.85988e-11	1.84137e-09
VCAM1	1.23784	4.69703	4.06864	61.6125	31.7572	0	0.188229	0	0.661793	0	-87.0356	-6.44353	5.01088e-11	1.89381e-09
TCF21	0	0	0	0	0.115062	40.5401	27.2933	39.6918	31.5455	27.08	424.617	8.73002	5.05988e-11	1.90754e-09
HSPA12A	2.47568	3.13135	3.05148	0.124722	0.115062	20.0997	21.7405	16.0657	18.8611	16.8335	38.8186	5.27867	5.08609e-11	1.91262e-09
SLC16A13	47.0379	37.5762	37.635	5.23831	5.75311	2.04404	0.564688	0	0.551495	0.731892	-33.9397	-5.0849	5.19515e-11	1.94877e-09
PAG1	0	0	0	0.124722	0.575311	12.9456	25.2227	11.6555	26.0305	12.0762	55.0589	5.7829	5.2334e-11	1.95823e-09
GPRC5A	16.0919	14.0911	10.1716	110.129	115.062	1.70336	2.5411	3.46516	3.52956	0	-23.1913	-4.53551	5.4252e-11	2.02496e-09
LY75-CD302	16.0919	4.69703	7.12013	14.9666	20.366	0	0.188229	0	0	0	-144.64	-7.17632	5.57076e-11	2.07414e-09
ADM2	0	0	0	0.374165	0	28.6165	11.482	29.6113	12.6844	15.3697	108.081	6.75596	5.63472e-11	2.09278e-09
AGTR1	0	1.56568	0	0	0	31.6826	34.6342	33.7065	35.0751	21.9568	410.852	8.68247	5.65109e-11	2.09369e-09
TPD52	16.0919	18.7881	21.3604	6.3608	5.75311	0	0.188229	0	0.110299	0	-100.993	-6.65812	5.94155e-11	2.19589e-09
EXOC6	69.319	46.9703	49.8409	129.336	120.815	10.2202	12.5173	7.24533	14.5595	10.6124	-7.6052	-2.92699	6.41063e-11	2.36345e-09
TSPAN7	121.308	90.8092	62.0468	0	0.115062	0	0	0	0	0.365946	-678.649	-9.40652	6.64073e-11	2.44229e-09
EGFR	0	1.56568	0	22.3252	28.0752	240.174	235.757	242.561	238.466	192.122	20.9359	4.3879	6.66721e-11	2.44605e-09
AQP1	152.254	28.1822	44.7551	0.124722	0.115062	0	0.0941147	0.315014	0	0.365946	-274.758	-8.10202	6.75643e-11	2.47276e-09
GALNT15	0	0	0	0.374165	0.460249	11.2422	18.07	13.2306	22.0598	17.9314	43.814	5.45332	6.92251e-11	2.52739e-09
SNTB1	1.23784	0	0	0.873052	0.115062	19.0777	16.376	20.7909	18.8611	14.2719	35.8811	5.16515	7.22797e-11	2.63252e-09
ZNF503	0	3.13135	1.01716	3.36748	4.14224	58.5957	17.9759	57.3326	16.4345	70.6276	15.7766	3.97972	7.47178e-11	2.71475e-09
GLIS1	0	0	1.01716	0	0	48.0349	14.2113	48.1972	13.6771	41.7179	387.334	8.59743	7.61342e-11	2.75954e-09
SLC12A2	118.833	203.538	233.947	123.724	123.232	23.8471	33.5989	20.7909	34.0824	15.0038	-6.1665	-2.62445	7.64865e-11	2.76565e-09
WNT5A	54.4649	31.3135	33.5663	0.374165	0.575311	565.858	1127.02	613.648	1286.53	427.791	33.9391	5.08487	7.78531e-11	2.80831e-09
DLL1	23.5189	39.1419	45.7723	2.99332	2.99162	0.340673	0	0.630028	0	0.731892	-75.4618	-6.23767	7.8213e-11	2.81455e-09
SLC25A4	747.655	637.23	552.319	22.3252	20.7112	20.4404	17.4112	21.106	20.295	14.6378	-21.0304	-4.39441	7.90704e-11	2.83861e-09
LMCD1	0	0	0	5.7372	3.3368	41.2214	63.4333	42.2119	67.9441	15.7357	17.5062	4.12979	7.92805e-11	2.83937e-09
CRIP2	152.254	161.265	153.591	173.363	167.185	36.452	20.8935	37.1717	21.5083	33.667	-5.57156	-2.47808	8.00667e-11	2.86072e-09
EHD4	627.584	479.097	504.512	263.786	288.921	38.1554	73.7859	37.1717	67.3926	31.4714	-8.63069	-3.10948	8.06132e-11	2.87342e-09
HSPA1L	178.249	140.911	188.175	1.12249	0.805435	3.06606	1.69406	2.83513	1.65448	3.29351	-40.427	-5.33725	8.33541e-11	2.9641e-09
CDC14B	0	7.82838	4.06864	2.49443	3.45187	33.7266	32.9401	35.9116	34.7442	40.986	11.2132	3.48713	8.89767e-11	3.15658e-09
MFGE8	25.9946	43.8389	39.6693	10.1025	12.5418	276.967	178.912	267.132	201.957	262.383	9.5715	3.25874	9.45512e-11	3.34644e-09
PTGDS	0	0	0	0	0.230124	29.2979	13.4584	48.1972	20.5156	8.05081	190.867	7.57642	9.59653e-11	3.38852e-09
FLT1	54.4649	48.5359	42.7208	554.637	622.371	12.2642	19.1053	14.1756	19.7435	6.95298	-18.2716	-4.19153	1.07654e-10	3.79234e-09
DHRS3	3.71352	4.69703	7.12013	15.3408	15.6485	0	0.0941147	0.315014	0.110299	0.365946	-61.2435	-5.93649	1.13899e-10	4.00297e-09
FAM189A2	25.9946	29.7478	28.4805	3.24276	3.10668	0	0	0.315014	0	0.365946	-151.923	-7.2472	1.2181e-10	4.27103e-09
VAMP8	7.42703	7.82838	11.1888	11.4744	9.4351	0.340673	0.470574	0	0	0.365946	-37.6997	-5.23648	1.22316e-10	4.2788e-09
HOXD8	112.643	118.991	102.733	16.3385	16.2238	0	0	0	0	0	-2720.25	-11.4095	1.29752e-10	4.52839e-09
CDK18	122.546	89.2435	101.716	0.124722	0	0	0.188229	0.315014	1.32359	0	-149.505	-7.22405	1.33085e-10	4.63395e-09
TSPAN12	28.4703	14.0911	9.15445	25.4432	25.889	2.72538	0.658803	1.89009	1.21329	1.09784	-15.6166	-3.96501	1.44266e-10	5.01167e-09
SOX13	241.379	203.538	156.643	12.5969	15.0731	12.9456	3.10579	11.9705	2.75747	5.12324	-17.5513	-4.13351	1.48973e-10	5.16326e-09
HOXA7	3.71352	3.13135	7.12013	18.5835	17.3744	0	0.188229	0.315014	0.330897	0	-48.4693	-5.599	1.53523e-10	5.30873e-09
PRKACB	334.217	234.851	219.707	212.9	200.438	25.2098	37.9282	32.1314	40.0385	35.4968	-6.87697	-2.78177	1.55945e-10	5.38011e-09
VAV3	47.0379	43.8389	41.7036	2.36971	4.02718	0	0.0941147	0	0	0	-473.169	-8.88621	1.58223e-10	5.44619e-09
SOX17	95.3136	73.5867	64.0812	34.5479	30.9517	0	0	0	0	0	-2183.14	-11.0922	1.66427e-10	5.70778e-09
TDRD7	102.741	133.082	119.008	34.2985	34.4036	10.2202	6.02334	8.19037	5.84584	10.6124	-10.3111	-3.36613	1.66581e-10	5.70778e-09
ADAM15	506.276	363.237	321.423	218.637	236.913	54.167	26.3521	57.3326	27.685	52.6962	-7.56781	-2.91988	1.6802e-10	5.74399e-09
ADAMTS12	9.90271	12.5254	11.1888	0.498887	0.345187	95.0477	129.031	96.0793	128.939	76.8487	16.7417	4.06538	1.79251e-10	6.11403e-09
SERPIND1	1.23784	0	0	81.9421	84.5707	0.340673	0.470574	0	0	0	-170.348	-7.41234	1.8097e-10	6.15873e-09
PDGFRB	0	0	0	0	0	530.087	145.313	503.078	156.294	420.838	13862.4	13.7589	1.92474e-10	6.53541e-09
LARGE1	34.6595	29.7478	31.532	2.8686	1.61087	0.340673	0	0.315014	0.441196	0	-80.1496	-6.32462	1.94885e-10	6.60239e-09
HS3ST3A1	0	0	0	0.124722	0	17.0336	62.3039	18.5858	58.7893	13.1741	446.885	8.80376	2.00448e-10	6.77561e-09
RAMP3	467.903	186.315	209.535	0	0	0	0	0	0	0	-6496.27	-12.6654	2.01233e-10	6.78688e-09
PLPP2	82.9352	79.8494	91.5445	7.98219	8.39954	2.72538	2.91756	4.09518	3.19867	2.56162	-17.0719	-4.09355	2.02975e-10	6.83033e-09
NBEA	81.6974	64.1927	76.2871	4.73942	3.3368	3.06606	0.470574	1.89009	0.882391	1.82973	-28.6301	-4.83946	2.03455e-10	6.83119e-09
TMEM200B	0	0	0	0.124722	0.690373	27.2538	11.6702	17.9558	14.2286	14.2719	44.4353	5.47364	2.13078e-10	7.13836e-09
CBS	4.95136	0	0	3.11804	2.41631	49.3976	23.3404	34.9666	16.2139	51.5984	14.2902	3.83695	2.33794e-10	7.81496e-09
FAM156B	0	0	0	7.98219	5.86817	49.7382	63.7157	69.9332	51.3993	68.4319	12.726	3.66971	2.34727e-10	7.82873e-09
ICAM5	1.23784	0	0	0.124722	0.460249	18.3963	16.2818	12.9156	17.0963	8.41676	43.9996	5.45942	2.4714e-10	8.22451e-09
GATD3	6.18919	10.9597	5.08581	43.4031	37.7404	1.02202	1.31761	0.315014	1.32359	0.731892	-21.1212	-4.40062	2.49199e-10	8.27472e-09
SYNGR2	56.9406	36.0105	40.6864	61.2383	56.0353	7.83548	7.34095	7.56034	7.61062	7.31892	-7.34544	-2.87685	2.55866e-10	8.47739e-09
gene:ENSG00000258465	99.0271	123.688	104.768	5.11359	4.94767	5.45077	2.07052	0	1.98538	0	-34.7986	-5.12096	2.63058e-10	8.69654e-09
RNF150	0	0	0	0	0.115062	20.0997	41.6928	22.996	39.7076	13.906	364.525	8.50987	2.68048e-10	8.84205e-09
CPS1	0	0	0	0	0.575311	15.3303	17.4112	11.0255	14.8904	16.8335	54.0859	5.75718	2.7244e-10	8.9477e-09
NLGN1	0	1.56568	0	115.118	121.045	0	0.0941147	0	0.330897	1.46378	-122.95	-6.94193	2.7196e-10	8.9477e-09
MALL	0	0	0	615.876	596.252	0	2.82344	1.89009	2.75747	0.365946	-150.688	-7.23542	2.85188e-10	9.34596e-09
DAPK2	66.8433	42.2732	26.4462	0.623608	1.15062	0	0.0941147	0	0.110299	0	-317.357	-8.30996	2.88748e-10	9.44207e-09
STXBP6	1.23784	0	3.05148	0	0	13.9676	17.9759	16.3807	20.7362	14.2719	72.9704	6.18924	2.9038e-10	9.47483e-09
UCP2	384.968	230.154	163.763	0.997773	1.03556	4.08807	5.45865	0.945043	4.85315	3.29351	-41.3052	-5.36825	2.94983e-10	9.60418e-09
TWIST2	0	0	0	0.124722	0	32.3639	18.3524	38.4317	19.4126	27.8119	348.29	8.44415	3.08621e-10	1.00265e-08
ADAMTS2	0	0	0	0	0	286.506	282.532	278.158	297.697	286.902	11323.5	13.467	3.28442e-10	1.06475e-08
PSD4	0	0	0	0.249443	0.115062	12.9456	14.2113	11.6555	16.4345	10.6124	76.2454	6.25258	3.41689e-10	1.10531e-08
STARD8	7.42703	12.5254	19.3261	14.4677	14.4978	2.04404	0.470574	0.945043	0.330897	1.82973	-17.9966	-4.16965	3.50741e-10	1.13215e-08
CPNE7	0	0	0	19.4566	26.9246	219.393	119.149	186.803	120.116	197.977	17.2771	4.11079	3.54982e-10	1.14339e-08
NPR1	123.784	164.396	166.814	2.74388	1.26568	0	0	0	0	0	-3431.7	-11.7447	3.60753e-10	1.1595e-08
TGFBI	8.66487	4.69703	4.06864	185.336	211.484	3865.62	1331.63	3861.44	1406.09	3319.5	33.0451	5.04636	3.70736e-10	1.18904e-08
LIN7A	0	0	0	11.4744	10.3556	59.6178	108.608	57.9626	95.0777	71.7254	15.358	3.94092	3.88182e-10	1.23979e-08
LIF	0	0	0	1.24722	1.38075	9.87951	66.9156	5.98527	87.2464	5.85514	43.3628	5.43838	3.88208e-10	1.23979e-08
PELI2	0	0	0	0.498887	0.345187	15.3303	9.88204	18.9009	8.82391	24.8843	40.5375	5.34118	4.03175e-10	1.28487e-08
B3GNT9	0	0	0	3.49221	4.60249	55.5297	27.6697	44.732	26.1408	45.3773	13.7985	3.78644	4.36804e-10	1.38909e-08
CTSH	94.0758	61.0613	47.8066	2.74388	3.3368	2.38471	0.658803	1.57507	1.10299	1.46378	-29.0053	-4.85824	4.59785e-10	1.45909e-08
KCNK2	1.23784	1.56568	3.05148	0	0	19.0777	46.775	20.7909	44.8917	8.78271	37.4579	5.2272	4.61272e-10	1.46073e-08
SCARF2	1.23784	0	3.05148	9.72829	13.002	58.9364	99.4792	58.9077	110.189	59.2833	11.577	3.53319	4.82126e-10	1.52356e-08
ABCA8	0	0	0	0.374165	0.460249	11.2422	10.1644	11.3405	12.1329	22.3227	34.4069	5.10462	4.87666e-10	1.53784e-08
PCSK6	105.216	86.1121	80.3557	0.124722	0.115062	0	0	0.630028	0.220598	1.46378	-117.787	-6.88003	4.93475e-10	1.5529e-08
CD248	0	0	0	0	0	362.817	180.324	355.651	187.618	285.804	10819.5	13.4014	5.00824e-10	1.57273e-08
GPSM1	7.42703	20.3538	15.2574	21.2027	25.4287	172.721	86.2091	142.701	94.8571	135.034	6.56456	2.7147	5.68771e-10	1.78239e-08
FMN1	1.23784	0	9.15445	0.74833	1.49581	25.2098	69.1743	17.9558	77.3195	20.493	18.0674	4.17532	6.11735e-10	1.91304e-08
FZD5	28.4703	21.9195	36.6178	4.48998	3.56693	0.681346	0.376459	0.315014	0.99269	0.731892	-28.1599	-4.81557	6.4224e-10	2.00427e-08
PTGER2	0	0	0	0	0	231.317	264.556	237.521	294.939	193.951	9676.79	13.2403	6.59089e-10	2.05259e-08
GRK3	0	0	0	0.873052	0.575311	12.6049	19.7641	13.5456	14.5595	18.6632	24.94	4.64039	6.79207e-10	2.11087e-08
JAM2	185.676	61.0613	33.5663	0.873052	1.15062	1.02202	1.31761	1.26006	1.87508	1.09784	-41.4485	-5.37325	6.89737e-10	2.13918e-08
TAMALIN	55.7028	81.4151	79.3386	28.8107	29.571	6.81346	0.376459	6.6153	0.661793	4.7573	-14.6417	-3.87201	7.12698e-10	2.20584e-08
LAMA5	448.098	399.247	391.607	153.907	183.064	55.5297	6.96449	46.3071	8.27242	34.033	-10.4645	-3.38743	7.39146e-10	2.28301e-08
PGM2L1	103.978	73.5867	79.3386	162.886	189.622	18.0557	21.4582	20.7909	19.4126	17.1995	-6.39601	-2.67717	7.44442e-10	2.29465e-08
DNAJC22	1.23784	0	0	0.997773	0.920498	17.715	13.1761	23.6261	12.5741	23.0546	19.6874	4.2992	7.59323e-10	2.33573e-08
ZNF469	0	0	0	21.5768	26.4643	235.405	190.3	229.33	213.208	64.4065	18.5413	4.21267	7.87704e-10	2.41809e-08
SHROOM2	14.8541	14.0911	14.2403	16.9621	19.9058	3.06606	1.41172	0.630028	0.772092	0	-15.1156	-3.91796	8.38881e-10	2.56995e-08
gene:ENSG00000283977	80.4595	75.1524	54.9267	0	0	0	0	0	0.220598	0	-504.706	-8.9793	8.49834e-10	2.59821e-08
MYRF	0	0	0	1.24722	1.72593	15.3303	18.6347	20.4759	21.398	23.4205	14.9414	3.90124	8.55226e-10	2.60939e-08
HHEX	8.66487	14.0911	20.3432	86.8063	76.5164	3.40673	3.57636	4.09518	2.97807	3.65946	-11.954	-3.57942	8.77117e-10	2.67077e-08
EMCN	19.8054	17.2224	13.2231	104.517	100.219	0	0	0	0	0	-1933.13	-10.9167	8.94959e-10	2.71959e-08
ITGA6	302.033	407.076	479.083	1069.36	1296.41	39.5181	125.361	38.7467	82.6139	26.7141	-11.33	-3.50207	8.98551e-10	2.72454e-08
PDGFC	0	0	0	17.3363	18.0648	88.2343	126.584	93.2442	136.44	95.5119	14.1206	3.81973	9.0021e-10	2.72454e-08
DIPK1B	7.42703	0	4.06864	55.127	59.142	0.340673	0.752918	0.315014	1.32359	0.731892	-34.3064	-5.10041	9.05531e-10	2.73514e-08
DIPK2B	14.8541	9.39405	5.08581	142.183	128.64	0	0	0	0	0	-2266.21	-11.1461	9.43178e-10	2.84314e-08
SLC38A4	0	0	0	0.124722	0.230124	10.2202	15.623	6.93031	14.3389	18.2973	73.4902	6.19948	9.51856e-10	2.86356e-08
GAREM1	0	0	0	1.7461	0.805435	32.3639	9.31736	35.9116	9.48571	24.8843	23.5809	4.55955	9.57317e-10	2.87424e-08
RAB34	14.8541	12.5254	13.2231	21.4521	19.6756	113.444	78.3975	125.691	75.3342	123.69	5.73657	2.52019	9.98101e-10	2.99072e-08
S100A4	54.4649	90.8092	168.849	0.249443	0.345187	1.02202	0.564688	1.57507	0.220598	2.19568	-56.5942	-5.82258	1.00746e-09	3.01276e-08
PPP2R2C	0	0	0	0.124722	0	13.9676	48.6573	15.1207	45.4431	9.88054	350.547	8.45347	1.02401e-09	3.05618e-08
KALRN	75.5082	53.233	82.3901	11.3497	11.8514	4.76942	0.847032	2.52011	0.330897	4.02541	-19.2348	-4.26565	1.03345e-09	3.07825e-08
IFI27	0	0	0	152.41	202.97	1.02202	0.188229	0.945043	0	1.09784	-108.69	-6.76408	1.05443e-09	3.13453e-08
gene:ENSG00000288656	0	0	1.01716	0.249443	0	18.0557	10.2585	19.8459	11.2505	10.2465	74.0434	6.2103	1.05864e-09	3.14083e-08
MME	0	1.56568	0	30.5568	24.9685	165.908	148.984	176.408	176.147	208.223	14.6239	3.87026	1.06435e-09	3.15156e-08
ELFN2	0	0	1.01716	3.86637	5.40792	31.6826	30.399	63.6329	34.5236	43.9135	12.0137	3.58661	1.08188e-09	3.19717e-08
F3	0	0	0	2.61915	2.30124	8.17615	109.361	10.3955	116.034	5.48919	38.1328	5.25296	1.08668e-09	3.20395e-08
EDNRA	0	0	0	0	0.115062	14.9896	43.1045	12.9156	42.1342	13.906	336.707	8.39535	1.08843e-09	3.20395e-08
HPCAL1	50.7514	53.233	45.7723	74.9577	79.3929	7.4948	12.0467	8.50538	10.4784	7.68487	-6.58544	-2.71928	1.0974e-09	3.22329e-08
PROCR	34.6595	37.5762	35.6006	513.978	503.052	11.9236	17.4112	11.9705	16.5448	14.6378	-15.525	-3.95652	1.09929e-09	3.22329e-08
DENND2B	7.42703	9.39405	8.13729	7.98219	7.70917	80.3988	32.7519	78.1235	35.4059	79.4103	7.56879	2.92006	1.15489e-09	3.37974e-08
SH2D4A	0	0	0	1.24722	0.575311	13.6269	30.9637	10.3955	32.3176	6.22108	27.1155	4.76104	1.26232e-09	3.68695e-08
MEIS3	0	0	0	0.124722	0	24.8691	16.4701	22.681	19.6332	23.7865	268.787	8.07032	1.26642e-09	3.69176e-08
DHRS9	3.71352	4.69703	7.12013	34.6726	30.7216	0	0	0	0.110299	0	-281.088	-8.13488	1.27637e-09	3.70639e-08
CYTH4	61.8919	56.3643	57.9782	0.124722	0	0	0.282344	0	0.110299	0	-275.317	-8.10495	1.27588e-09	3.70639e-08
MECOM	258.708	236.417	205.467	82.8152	83.305	30.6606	22.4934	26.4612	22.501	32.5692	-6.38818	-2.6754	1.32136e-09	3.82966e-08
SNRK	112.643	150.305	140.368	201.176	195.261	27.9352	32.4696	26.4612	39.0458	34.033	-5.05459	-2.33759	1.32467e-09	3.83186e-08
PRKG1	0	0	0	3.36748	3.22174	40.8807	28.0462	37.8017	29.3395	33.3011	11.8787	3.5703	1.35638e-09	3.91605e-08
LRP5	365.162	310.004	311.251	92.0446	107.468	31.0012	28.9873	34.3365	29.6704	19.7611	-8.18051	-3.03219	1.38451e-09	3.98963e-08
THSD1	92.8379	100.203	107.819	31.4299	31.412	6.47279	4.61162	11.0255	4.41196	15.3697	-8.71665	-3.12377	1.45758e-09	4.19214e-08
CHD7	21.0433	68.8897	64.0812	34.9221	44.6441	3.7474	7.62329	3.15014	7.05913	1.46378	-9.45793	-3.24152	1.50399e-09	4.31738e-08
FAM107A	9.90271	3.13135	4.06864	27.0646	32.9078	0	0.0941147	0	0	0	-273.456	-8.09517	1.54061e-09	4.41408e-08
NT5DC2	7.42703	7.82838	11.1888	46.147	54.7696	285.825	216.276	296.743	207.913	279.583	9.58417	3.26065	1.55132e-09	4.43631e-08
MAP9	1.23784	1.56568	5.08581	0.873052	0.575311	13.9676	26.7286	14.4907	29.6704	14.2719	16.4219	4.03755	1.57808e-09	4.50428e-08
GPR137B	578.071	361.671	361.092	9.72829	9.4351	15.3303	10.3526	17.3258	12.0226	10.9784	-19.9434	-4.31784	1.59349e-09	4.53964e-08
SLC7A5	42.0865	31.3135	42.7208	14.7172	15.5334	316.485	159.995	360.061	154.418	116.737	7.82724	2.9685	1.6032e-09	4.55866e-08
PABPC3	66.8433	68.8897	53.9095	0	0.115062	0	0.188229	0	0	0	-480.547	-8.90853	1.62788e-09	4.62012e-08
HPSE	0	0	0	109.007	107.353	0.681346	0.564688	0.945043	0.441196	0	-78.5767	-6.29603	1.63531e-09	4.62375e-08
SIPA1	155.968	189.447	188.175	51.8842	66.2758	22.4844	15.623	24.8861	16.3242	18.2973	-6.61682	-2.72614	1.63234e-09	4.62375e-08
CXCL5	0	0	0	8.48107	8.05435	36.1113	113.785	43.1569	115.042	25.2503	17.0246	4.08955	1.64749e-09	4.64707e-08
TIMP1	4.95136	10.9597	14.2403	101.149	107.123	1143.98	493.255	1216.27	528.001	590.271	16.3665	4.03267	1.64974e-09	4.64707e-08
CRABP2	0	0	1.01716	0.249443	0.230124	27.2538	6.49391	24.2561	6.94883	10.2465	50.3367	5.65354	1.69871e-09	4.77607e-08
VDR	0	0	0	0.124722	0.805435	15.3303	11.2938	19.2159	9.37541	12.8081	30.7717	4.94353	1.71255e-09	4.80324e-08
HNRNPA1P48	71.7947	95.5062	80.3557	2.61915	3.45187	0	2.25875	2.2051	2.75747	1.09784	-29.0727	-4.86159	1.71476e-09	4.80324e-08
KCNE4	0	0	0	0	0.115062	32.7046	14.1172	24.2561	14.5595	22.3227	276.167	8.1094	1.74592e-09	4.88144e-08
PRICKLE2	16.0919	7.82838	11.1888	6.48553	8.74473	49.0569	68.892	54.8125	78.4225	49.4027	6.8474	2.77556	1.7613e-09	4.91529e-08
FAM124B	0	6.2627	1.01716	44.8998	42.8031	0	0	0	0	0.365946	-254.744	-7.99291	1.79889e-09	5.01092e-08
LRP1	47.0379	136.214	216.655	11.2249	20.5961	1531.32	1106.13	1572.24	1198.07	1566.62	16.2752	4.02461	1.86252e-09	5.17857e-08
MX1	0	6.2627	5.08581	26.6904	18.2949	0	0.188229	0	0.220598	0	-81.184	-6.34312	1.9131e-09	5.30937e-08
TM6SF1	174.535	103.335	100.699	46.6459	46.1399	0.340673	13.8349	2.83513	15.5521	7.31892	-11.5374	-3.52824	1.91701e-09	5.31044e-08
TUBA4A	129.973	98.6375	91.5445	23.6971	27.73	11.5829	1.88229	10.0805	1.76478	6.95298	-11.6223	-3.53883	2.12735e-09	5.88228e-08
PRRX2	0	0	0	0.124722	0.230124	24.8691	7.0586	18.9009	5.73554	16.8335	82.6862	6.36958	2.19182e-09	6.04942e-08
TANC2	23.5189	14.0911	17.2917	23.0735	28.0752	140.017	147.854	135.456	139.528	113.809	5.6634	2.50167	2.23574e-09	6.15934e-08
GDPD5	30.946	37.5762	32.5492	27.1893	30.4915	6.81346	2.35287	5.67026	1.87508	3.65946	-8.514	-3.08984	2.26607e-09	6.23149e-08
MEF2C	63.1298	109.597	109.853	49.6392	58.2215	7.4948	13.8349	8.50538	12.5741	9.5146	-7.13821	-2.83556	2.28384e-09	6.26889e-08
ZFHX2	12.3784	21.9195	18.3089	2.99332	3.68199	0	0.282344	0	0.330897	0	-53.2078	-5.73357	2.37155e-09	6.4978e-08
H3-5	74.2703	76.7181	68.1498	0	0	0	0.0941147	0	0	0	-814.729	-9.67018	2.38045e-09	6.5103e-08
PKDCC	6.18919	3.13135	6.10297	0	0.115062	109.015	22.5875	100.805	23.8246	105.758	26.0192	4.70151	2.63444e-09	7.19188e-08
TRPS1	1.23784	0	0	3.36748	2.30124	29.9792	26.1639	32.4465	25.479	27.446	10.8082	3.43406	2.72962e-09	7.43823e-08
CTTNBP2	1.23784	3.13135	3.05148	1.49666	1.38075	22.1437	17.1289	24.2561	13.8977	21.2249	11.8046	3.56127	2.74493e-09	7.4664e-08
SPTBN2	2.47568	29.7478	11.1888	25.8174	28.9957	1.02202	1.78818	1.57507	1.10299	1.09784	-14.6952	-3.87727	2.87589e-09	7.80851e-08
LAMA2	0	0	0	1.12249	0.575311	16.0116	13.3643	14.4907	17.4272	18.6632	20.8881	4.38461	2.90639e-09	7.8771e-08
GPAT3	18.5676	3.13135	8.13729	37.6659	37.8555	0.681346	1.22349	1.57507	0.772092	2.92757	-15.7467	-3.97697	3.04579e-09	8.24007e-08
DOCK6	96.5514	106.466	121.042	103.27	100.679	23.5064	19.0112	23.6261	21.398	22.6887	-4.87043	-2.28405	3.12521e-09	8.43976e-08
POTEF	158.443	151.871	164.78	0	0	0	0	0	0	0	-3569.42	-11.8015	3.23133e-09	8.71071e-08
RAB3IP	22.2811	15.6568	17.2917	27.0646	29.686	4.42875	2.82344	3.15014	3.30897	2.92757	-8.24052	-3.04274	3.31552e-09	8.92166e-08
BST1	82.9352	68.8897	72.2184	32.4276	32.7927	8.51682	9.31736	5.35524	9.596	2.92757	-7.6677	-2.93879	3.33611e-09	8.96103e-08
CSNK2A3	54.4649	62.627	57.9782	0.124722	0.345187	0	0.658803	0	0.661793	0	-105.206	-6.71707	3.42409e-09	9.18096e-08
NXN	297.081	303.741	307.183	12.9711	13.6924	14.9896	7.90563	16.3807	7.72092	19.0292	-14.1427	-3.82198	3.4447e-09	9.21979e-08
PRKCG	64.3676	51.6673	45.7723	0	0	0	0	0.315014	0.110299	0.365946	-191.188	-7.57885	3.72198e-09	9.94424e-08
AKR1B10	32.1838	43.8389	36.6178	0.873052	0.230124	0.681346	0	0.315014	0.110299	0	-102.295	-6.67659	3.77239e-09	1.00611e-07
PRSS12	0	1.56568	0	29.559	25.4287	123.324	203.382	120.335	199.641	196.513	14.2244	3.8303	3.78745e-09	1.00833e-07
TNFSF18	0	0	0	69.7194	50.8575	0	0.0941147	0	0	0.365946	-222.918	-7.80037	3.79502e-09	1.00856e-07
DIRAS1	0	0	0	0	0.230124	17.715	8.56444	18.5858	7.16943	16.1016	104.775	6.71115	3.87822e-09	1.02886e-07
SEMA5A	0	0	0	0	0	212.58	114.161	202.869	107.211	155.893	6244.55	12.6084	3.90737e-09	1.03476e-07
SPON2	0	0	0	0	0	140.357	187.382	125.061	194.126	123.324	6103.41	12.5754	3.98041e-09	1.05225e-07
PIANP	0	0	0	0.498887	0.230124	18.0557	5.83511	17.6408	6.06644	17.1995	39.5629	5.30608	3.99675e-09	1.05472e-07
B4GALT4	2.47568	4.69703	4.06864	5.98664	4.60249	36.1113	41.9752	39.6918	50.4066	27.8119	8.00444	3.0008	4.10956e-09	1.08259e-07
ADGRL2	123.784	184.75	141.385	195.813	212.635	41.5621	12.7996	35.9116	12.4638	36.2287	-6.26976	-2.64841	4.8305e-09	1.26948e-07
GSTM2	3.71352	0	6.10297	1.87082	2.07112	26.5725	21.4582	23.9411	25.1482	25.9822	10.7923	3.43193	4.83587e-09	1.26948e-07
ZNF853	0	0	0	0.249443	0	10.2202	12.0467	14.1756	12.7947	9.88054	93.4938	6.5468	4.99927e-09	1.31009e-07
POTEE	45.8	48.5359	77.3042	0	0	0	0	0	0	0.365946	-421.505	-8.71941	5.07102e-09	1.32658e-07
EGLN3	32.1838	46.9703	80.3557	0	0	0	0.282344	0	0.110299	0	-252.431	-7.97974	5.09614e-09	1.33084e-07
AK4	0	0	0	3.36748	5.86817	16.693	102.585	14.8057	102.247	12.8081	21.6211	4.43437	5.13104e-09	1.33763e-07
ERAP2	0	0	0	316.169	305.26	2.38471	2.82344	1.26006	1.98538	1.82973	-59.6559	-5.89859	5.18983e-09	1.35061e-07
SLC14A1	74.2703	104.9	88.493	0.124722	0	0	0.941147	0	1.43389	0	-99.2908	-6.63359	5.27623e-09	1.37073e-07
CCL2	9.90271	0	4.06864	120.356	118.054	0	0	0	0	0	-1906.03	-10.8964	5.49557e-09	1.42525e-07
PIK3C2B	14.8541	17.2224	27.4634	16.4633	19.2154	3.06606	0.564688	2.52011	0.220598	1.09784	-14.7801	-3.88559	5.56365e-09	1.44042e-07
PLK3	332.979	201.972	218.69	25.4432	26.4643	18.0557	16.6583	13.8606	18.7508	17.9314	-9.38442	-3.23027	5.66427e-09	1.46395e-07
ARHGEF10L	0	0	0	0.124722	0	23.5064	15.5289	19.2159	17.4272	15.7357	229.46	7.8421	5.82979e-09	1.50414e-07
ZNF667	1.23784	0	1.01716	0	0.230124	7.15413	10.2585	9.76544	10.699	9.5146	42.4679	5.4083	5.99746e-09	1.54476e-07
C1orf115	0	0	0	53.3809	56.0353	0.340673	0.188229	0	0.220598	0	-120.962	-6.91841	6.02136e-09	1.54826e-07
TBX2	11.1406	7.82838	12.2059	0.124722	0	119.236	66.3509	119.39	76.768	171.629	18.6593	4.22182	6.08078e-09	1.56087e-07
GIMAP8	0	0	2.03432	44.7751	46.6002	0	0	0	0	0.365946	-238.682	-7.89894	6.16299e-09	1.57928e-07
TM4SF18	0	0	0	200.552	205.386	0	0	0	0	0	-3066.17	-11.5822	6.24619e-09	1.59788e-07
NPR3	0	0	0	0	0	158.754	123.761	156.562	151.22	106.856	5502.94	12.426	6.30125e-09	1.60923e-07
GCNT2	1.23784	1.56568	2.03432	21.7016	27.9601	0	0	0.315014	0.110299	0.365946	-73.6296	-6.20221	6.41731e-09	1.63332e-07
KCTD12	2.47568	1.56568	7.12013	577.586	571.974	1.36269	10.0703	2.52011	10.3681	3.29351	-41.609	-5.37882	6.41379e-09	1.63332e-07
KAZN	0	1.56568	0	0.623608	0.345187	8.8575	23.2463	8.8204	18.4199	6.95298	27.4662	4.77959	6.53334e-09	1.65724e-07
MCAM	272.325	247.377	235.981	2486.83	2519.63	85.5089	51.1043	87.889	48.8624	99.5373	-15.4706	-3.95146	6.523e-09	1.65724e-07
JAG1	106.454	128.385	142.403	187.207	194.455	40.8807	13.0819	33.3915	16.986	35.1308	-5.55159	-2.4729	6.5599e-09	1.66118e-07
TC2N	134.924	159.699	102.733	0	0	0.681346	1.69406	1.57507	1.87508	1.09784	-55.7389	-5.80061	6.64082e-09	1.67884e-07
DES	1.23784	0	0	0	0	7.4948	34.5401	8.19037	39.487	6.22108	205.879	7.68565	6.70782e-09	1.6901e-07
ESM1	0	0	0	1609.78	1623.53	0.340673	11.9526	0.945043	7.83122	0.365946	-149.111	-7.22024	6.70378e-09	1.6901e-07
TMCC3	1.23784	3.13135	4.06864	77.3274	87.6774	1.36269	0.847032	2.52011	1.10299	1.09784	-25.332	-4.66289	6.72781e-09	1.6923e-07
ITPKB	24.7568	32.8792	39.6693	27.8129	37.5103	4.42875	2.07052	8.50538	1.87508	3.65946	-8.48338	-3.08464	6.83497e-09	1.71639e-07
TET1	0	0	0	0.74833	0.575311	11.5829	21.1758	9.13541	20.0744	6.58703	24.9843	4.64295	7.01311e-09	1.75819e-07
GDPD1	11.1406	28.1822	21.3604	5.36303	5.06274	1.36269	0.564688	0.630028	0.441196	0.731892	-18.4755	-4.20754	7.03287e-09	1.76021e-07
P4HA2	48.2757	39.1419	38.6521	73.9599	79.7381	395.521	349.636	358.171	361.78	259.456	5.84545	2.54731	7.07121e-09	1.76686e-07
CYRIA	21.0433	17.2224	26.4462	34.049	39.4663	0	0	0	0	0	-1108.58	-10.1145	7.17721e-09	1.79038e-07
LY6K	0	0	0	2.12027	2.07112	9.53884	44.4221	20.1609	29.5601	16.1016	16.3312	4.02956	7.32134e-09	1.8233e-07
PCDH17	3.71352	3.13135	6.10297	8.60579	8.28448	0	0.376459	0	0.220598	0	-33.5155	-5.06676	7.39747e-09	1.83922e-07
SELE	0	4.69703	2.03432	198.058	80.1983	0	0	0	0	0	-2150.97	-11.0708	7.55077e-09	1.87423e-07
PPP1R13B	45.8	45.4046	53.9095	31.1804	33.9433	3.7474	6.77626	7.87535	6.06644	3.65946	-6.71648	-2.7477	7.66668e-09	1.89987e-07
ADGRG1	159.681	183.184	156.643	131.207	156.6	26.9132	0.847032	28.6663	1.65448	13.1741	-11.1221	-3.47536	8.1743e-09	2.02233e-07
MGP	0	0	0	59.2428	65.9306	0.681346	0.188229	0	0.330897	0.365946	-75.8992	-6.24601	8.20938e-09	2.02768e-07
TSPAN18	3.71352	1.56568	5.08581	12.098	12.0815	0	0.188229	0	0.110299	0	-63.4813	-5.98826	8.49609e-09	2.09505e-07
TMEM132B	0	0	0	0.249443	0.115062	10.5609	13.6466	11.3405	13.0153	4.39135	60.4321	5.91724	8.56677e-09	2.10902e-07
RPL10L	128.735	111.163	124.094	0	0	0	0	0	0	0	-2733.13	-11.4163	9.13981e-09	2.24642e-07
TULP4	601.59	555.815	631.657	25.6927	26.6944	25.8911	28.9873	29.9263	31.7661	24.8843	-12.9806	-3.69828	9.17084e-09	2.25037e-07
KLHL4	0	0	0	70.343	75.3657	0	0.0941147	0	0	0	-557.112	-9.12182	9.34743e-09	2.28997e-07
LHX6	48.2757	57.93	55.9439	0.623608	0.920498	0	0	1.57507	0	0.731892	-72.3324	-6.17657	9.45251e-09	2.30819e-07
FLRT2	79.2217	46.9703	62.0468	68.8464	85.146	7.83548	15.9995	6.93031	13.2359	5.48919	-6.66276	-2.73612	9.44716e-09	2.30819e-07
PAQR5	0	0	1.01716	0.249443	0.460249	11.9236	10.3526	12.2856	10.2578	5.48919	26.2206	4.71263	9.64723e-09	2.35192e-07
ZNF366	14.8541	12.5254	16.2746	3.36748	3.45187	0	0.188229	0	0	0	-102.957	-6.6859	1.03005e-08	2.50713e-07
CDK17	231.476	264.599	236.999	204.793	205.386	23.1658	53.2689	25.2011	49.7448	25.6162	-6.32262	-2.66052	1.09583e-08	2.66293e-07
ELMO1	21.0433	18.7881	19.3261	30.6815	30.8367	0	0	0	0	0	-1007.14	-9.97604	1.14683e-08	2.78237e-07
CFAP54	1.23784	3.13135	4.06864	37.1671	40.617	1.02202	0.847032	0	0.551495	0.731892	-27.0045	-4.75513	1.15838e-08	2.80585e-07
CTSS	0	0	0	56.9978	42.6881	0	0.188229	0	0	0.365946	-151.228	-7.24058	1.18757e-08	2.87193e-07
CYTL1	0	0	0	65.853	44.8743	0	0.188229	0	0	0	-293.215	-8.19581	1.21517e-08	2.93395e-07
ALPK2	0	0	0	0	0	131.5	127.525	115.925	123.976	69.5298	4497.95	12.1351	1.21892e-08	2.93829e-07
KCNN2	0	0	0	0.623608	0.115062	31.0012	2.44698	39.3768	3.19867	19.3951	64.8092	6.01813	1.22351e-08	2.94464e-07
GRIA1	0	0	0	0	0.115062	10.2202	30.7755	8.50538	32.5382	9.5146	243.944	7.93041	1.26306e-08	3.03498e-07
DSG2	0	0	0	0	0	115.829	115.573	108.365	116.365	94.78	4402.03	12.104	1.29037e-08	3.09566e-07
CNN1	3.71352	1.56568	2.03432	0.124722	0.115062	43.2655	11.8585	29.9263	13.1256	11.3443	23.2003	4.53607	1.32833e-08	3.18164e-07
PPP1R3C	0	0	0	4.48998	7.5941	47.0129	44.8927	42.2119	54.7083	43.1816	9.7327	3.28284	1.33433e-08	3.19094e-07
SMARCD3	8.66487	4.69703	8.13729	3.99109	3.91211	38.1554	29.8344	37.4867	34.0824	34.7649	7.62428	2.9306	1.37185e-08	3.27546e-07
LBH	18.5676	20.3538	14.2403	19.4566	22.3221	105.949	135.337	105.215	157.286	53.0622	5.77787	2.53054	1.38849e-08	3.30993e-07
ARID5B	29.7081	45.4046	39.6693	4.48998	6.0983	224.844	184.559	206.019	184.971	217.372	8.46957	3.08229	1.39994e-08	3.33194e-07
CCND2	32.1838	17.2224	22.3775	4.86414	5.40792	101.861	120.843	99.2295	120.998	104.661	7.21346	2.85069	1.41711e-08	3.36749e-07
CHST2	11.1406	29.7478	15.2574	11.7238	10.9309	30.6606	353.589	46.9371	371.266	36.5946	10.8354	3.43768	1.44687e-08	3.43278e-07
GNGT2	18.5676	9.39405	8.13729	2.8686	4.48743	0	0.0941147	0	0.220598	0	-63.0006	-5.97729	1.52189e-08	3.60508e-07
EPPK1	49.5136	42.2732	53.9095	0.124722	0.115062	0.681346	0.188229	0.315014	0.220598	0.731892	-67.5324	-6.07751	1.52859e-08	3.61526e-07
NOTCH1	325.552	380.459	383.47	88.4277	123.347	41.9028	24.3757	44.732	21.5083	53.7941	-6.97816	-2.80285	1.57351e-08	3.71567e-07
EFNA1	4.95136	7.82838	8.13729	8.85524	8.5146	1.36269	0.0941147	0.630028	0.110299	1.09784	-20.5352	-4.36003	1.65325e-08	3.89784e-07
PLXNA4	2.47568	15.6568	18.3089	51.0112	57.9913	0	0	0	0	0	-1109.86	-10.1162	1.65758e-08	3.90193e-07
CA9	0	0	0	0	0.230124	9.19817	9.41147	9.13541	11.2505	9.88054	77.0795	6.26828	1.69352e-08	3.98031e-07
CARD11	0	0	0	56.4989	66.2758	0	0.376459	0	0.661793	0	-95.7208	-6.58076	1.70696e-08	4.00562e-07
ADPRH	39.6108	17.2224	20.3432	6.98441	4.48743	1.36269	1.50584	0.945043	0.882391	0.731892	-14.8712	-3.89445	1.72045e-08	4.03075e-07
KCNH2	63.1298	29.7478	48.8237	0	0	0	0	0	0	0.365946	-348.665	-8.4457	1.72302e-08	4.03075e-07
PNMA2	0	0	0	79.4477	77.8971	1.02202	0.282344	0.945043	0.220598	0.365946	-55.002	-5.78141	1.72866e-08	4.03766e-07
TCEA3	0	0	0	1.12249	1.15062	13.9676	14.3995	18.2708	14.8904	18.6632	15.1682	3.92298	1.81032e-08	4.22184e-07
C1QL3	39.6108	81.4151	96.6303	0.124722	0	0	0.941147	0.315014	0.110299	1.46378	-73.8339	-6.20621	1.83098e-08	4.26341e-07
LGALSL	25.9946	28.1822	28.4805	2.8686	2.64643	1.02202	0.941147	0.630028	0.772092	0.365946	-21.3963	-4.41929	1.87017e-08	4.34794e-07
AR	1.23784	1.56568	2.03432	27.1893	34.0584	0.340673	0.188229	0.315014	0.551495	0.365946	-36.5097	-5.19021	1.91343e-08	4.44163e-07
CHN2	76.746	64.1927	40.6864	2.8686	3.10668	0	0	0	0	0	-1389.82	-10.4407	1.94049e-08	4.49751e-07
APOL1	0	0	0	63.4833	57.1859	0	0.658803	0	0.330897	0.365946	-77.5491	-6.27704	1.94836e-08	4.5088e-07
SERPINB7	0	0	0	0	0.115062	8.8575	29.1756	8.8204	23.2731	13.54	222.124	7.79522	2.04263e-08	4.7197e-07
P2RY2	73.0325	42.2732	27.4634	6.98441	8.85979	0	0	0	0	0	-1164.16	-10.1851	2.07952e-08	4.79758e-07
CADPS2	0	0	0	74.5836	64.78	0	0.752918	0.315014	0.551495	0.365946	-63.9443	-5.99874	2.16989e-08	4.99114e-07
ENPP2	0	0	0	0	0.115062	17.0336	10.3526	20.7909	11.1402	20.493	202.291	7.66029	2.17006e-08	4.99114e-07
CREB3L2	32.1838	53.233	53.9095	102.771	122.886	550.527	512.737	539.619	486.639	442.795	6.72487	2.74951	2.20138e-08	5.05545e-07
HTR1B	0	0	0	91.421	76.8615	0	0.470574	1.26006	0.551495	0.731892	-54.178	-5.75963	2.23428e-08	5.12197e-07
PIK3R2	17.3297	23.4851	22.3775	11.4744	11.046	85.8496	60.9863	89.779	67.2823	119.298	5.50114	2.45973	2.23716e-08	5.12197e-07
ABCG1	11.1406	20.3538	22.3775	1.99555	3.56693	0	0	0	0	0.365946	-167.572	-7.38864	2.30218e-08	5.26282e-07
ADAM12	4.95136	1.56568	14.2403	18.833	20.8263	116.169	79.0563	104.9	99.8205	54.526	6.66156	2.73586	2.33435e-08	5.32827e-07
TRHDE	0	0	0	0	0	77.6734	126.773	82.2187	111.953	91.1206	3889.37	11.9253	2.35977e-08	5.37813e-07
CTSV	27.2325	36.0105	37.635	0.873052	0.690373	0.681346	0.376459	0.315014	0.441196	0.731892	-38.618	-5.2712	2.40529e-08	5.47357e-07
DYNC1I1	27.2325	42.2732	24.4119	0.124722	0.460249	0.340673	0.282344	0	0.110299	0	-101.422	-6.66423	2.46102e-08	5.59195e-07
B4GALNT4	0	0	0	2.8686	4.14224	44.2875	21.2699	31.8164	21.1774	28.1778	11.1693	3.48147	2.4969e-08	5.66491e-07
EMP2	0	0	0	3.24276	3.68199	35.0893	22.7758	42.2119	21.1774	17.1995	11.0503	3.46602	2.63782e-08	5.97561e-07
E2F8	22.2811	32.8792	29.4977	13.4699	16.569	3.7474	0.941147	3.78017	0.772092	1.46378	-11.3159	-3.50028	2.65221e-08	5.99917e-07
SLC1A5	13.6162	9.39405	14.2403	68.7216	64.0896	383.598	204.982	385.577	210.009	242.988	8.08568	3.01537	2.67281e-08	6.03669e-07
PLVAP	2.47568	10.9597	3.05148	16.2138	10.1255	0	0.0941147	0	0	0	-151.872	-7.24671	2.97014e-08	6.69818e-07
ZSCAN18	0	0	0	1.24722	1.26568	17.715	17.1289	14.1756	16.3242	10.9784	14.2553	3.83342	3.02936e-08	6.82149e-07
FKBP10	23.5189	26.6165	36.6178	125.969	144.518	748.118	436.692	721.383	456.748	738.479	8.51542	3.09008	3.10786e-08	6.98781e-07
STMN3	0	0	1.01716	0.873052	1.15062	17.715	10.9173	17.9558	9.37541	13.906	14.3768	3.84567	3.14457e-08	7.0598e-07
MOCOS	55.7028	21.9195	27.4634	7.73274	6.32842	2.72538	1.12938	2.52011	1.10299	1.09784	-13.7352	-3.7798	3.20378e-08	7.18201e-07
PARP8	1.23784	0	0	0.124722	0.460249	7.4948	13.1761	5.35524	16.3242	6.58703	29.559	4.88552	3.20883e-08	7.18263e-07
SULT1B1	0	0	0	350.842	377.404	1.02202	4.04693	0	4.30166	0.365946	-73.0387	-6.19059	3.22834e-08	7.21555e-07
ADD2	69.319	75.1524	88.493	0.249443	0.230124	0	0	0	0	0	-1745.27	-10.7692	3.25239e-08	7.25852e-07
FOXO3	24.7568	18.7881	15.2574	27.6882	35.7843	100.499	186.818	93.5592	194.126	107.222	5.33809	2.41632	3.36734e-08	7.50394e-07
PLAU	129.973	147.173	123.076	93.5412	100.104	9.87951	29.3638	9.76544	37.281	12.4422	-5.86826	-2.55293	3.37269e-08	7.50472e-07
ARHGAP26	18.5676	17.2224	9.15445	27.9377	23.9329	1.36269	1.69406	4.4102	1.43389	2.92757	-9.27619	-3.21353	3.55236e-08	7.89285e-07
PTPRU	0	3.13135	0	4.48998	2.07112	48.3756	12.6114	42.5269	13.4565	34.033	12.6919	3.66584	3.57227e-08	7.91371e-07
KIF4B	22.2811	21.9195	23.3947	0.623608	0.920498	0.340673	0.0941147	0.315014	0	0.365946	-64.0652	-6.00147	3.56818e-08	7.91371e-07
GBP6	33.4217	57.93	51.8752	0	0	0	0.0941147	0	0	0	-529.455	-9.04836	3.64196e-08	8.05624e-07
KANK2	34.6595	39.1419	27.4634	56.2495	51.4328	322.958	149.078	332.655	167.654	282.876	5.82827	2.54307	3.73235e-08	8.24405e-07
GMFG	2.47568	0	7.12013	16.7127	11.3912	0	0.188229	0	0	0	-91.9091	-6.52214	3.81707e-08	8.41882e-07
LCP1	17.3297	21.9195	19.3261	1.49666	0.690373	0	0.376459	0	0	0	-86.8039	-6.43969	4.06841e-08	8.96003e-07
PYGB	29.7081	28.1822	30.5148	86.5568	90.2088	413.577	255.898	404.163	259.644	377.656	6.22671	2.63847	4.11887e-08	9.0579e-07
CCNA1	0	0	0	41.1581	38.5458	0	0	0	0.110299	0.365946	-144.601	-7.17593	4.1276e-08	9.06384e-07
GCOM1	0	3.13135	2.03432	21.7016	21.8618	0	0.282344	0	0	0	-92.9004	-6.53761	4.18395e-08	9.17419e-07
MR1	1.23784	0	1.01716	0.997773	1.841	14.9896	12.8937	17.9558	14.1183	25.9822	12.4542	3.63856	4.19932e-08	9.19449e-07
FOXF2	11.1406	7.82838	6.10297	0	0	104.927	49.4102	91.9841	49.4139	128.813	18.1306	4.18035	4.23283e-08	9.25439e-07
FAM174B	0	0	0	43.7773	46.4851	0.340673	0	0	0.330897	0.365946	-80.7945	-6.33619	4.46146e-08	9.72599e-07
APOBEC3C	0	0	0	12.4722	11.3912	69.1566	50.1631	63.9479	48.4212	103.929	12.2749	3.61764	4.46094e-08	9.72599e-07
gene:ENSG00000284874	0	0	0	0	0.230124	15.671	5.36454	16.6958	5.51495	9.5146	81.9753	6.35712	4.5601e-08	9.92662e-07
FAM167A	0	0	0	2.36971	2.64643	18.0557	23.3404	24.2561	27.9056	15.7357	10.5876	3.4043	4.5979e-08	9.99445e-07
RNF103-CHMP3	49.5136	31.3135	39.6693	1.12249	0	0	0.564688	0	0.772092	0	-71.9414	-6.16875	4.67248e-08	1.01419e-06
TACSTD2	0	0	0	42.7795	42.8031	0	0.376459	0	0.330897	0	-90.3047	-6.49673	4.95239e-08	1.07154e-06
VEGFA	34.6595	25.0508	19.3261	18.9577	17.1443	114.466	150.678	108.365	173.169	56.7216	5.47474	2.45279	4.95805e-08	1.07154e-06
VSIG2	34.6595	20.3538	11.1888	0.74833	0.690373	0	0.0941147	0.315014	0.220598	0.365946	-60.9977	-5.93068	4.9479e-08	1.07154e-06
SPINT1	0	0	0	0.374165	0.920498	8.17615	12.4231	7.56034	11.4711	9.88054	17.633	4.14021	4.98919e-08	1.07672e-06
UGT1A6	87.8866	89.2435	78.3214	0	0	0	0	0	0	0	-1915.89	-10.9038	5.05386e-08	1.08911e-06
WNT5B	0	0	0	0	0	52.123	150.489	64.2629	141.183	32.5692	3490.59	11.7693	5.11791e-08	1.10134e-06
ARSI	0	0	0	0	0.115062	37.474	4.51751	37.8017	3.75016	13.906	260.65	8.02597	5.16063e-08	1.10895e-06
BMX	3.71352	1.56568	2.03432	72.2138	75.826	0	0	0	0	0	-1179.83	-10.2044	5.25488e-08	1.12759e-06
SELP	55.7028	45.4046	49.8409	1.49666	2.53137	0	0	0	0	0	-1147.97	-10.1649	5.31433e-08	1.13872e-06
gene:ENSG00000256591	33.4217	20.3538	12.2059	3.24276	3.45187	0	0.0941147	1.26006	0.551495	1.09784	-24.1375	-4.59321	5.65235e-08	1.20943e-06
LMO1	69.319	81.4151	83.4072	0	0.115062	0	0	0	0	0	-1754.7	-10.777	5.73439e-08	1.22524e-06
PRKCE	39.6108	36.0105	29.4977	42.6548	46.4851	6.81346	7.15272	10.7105	8.16212	6.22108	-5.53424	-2.46838	5.88996e-08	1.25669e-06
SEMA6A	18.5676	57.93	42.7208	1.12249	0.575311	1.02202	1.22349	0.315014	0.330897	0.365946	-34.4167	-5.10504	5.91436e-08	1.26011e-06
RMDN2	3.71352	1.56568	4.06864	1.12249	2.30124	16.0116	28.1403	12.2856	36.8398	16.4676	10.1839	3.34822	6.01146e-08	1.27899e-06
PRCP	268.611	195.709	202.415	487.038	474.401	56.8924	63.4333	63.0028	59.0099	66.6022	-5.31393	-2.40978	6.03407e-08	1.28198e-06
ECHDC3	0	1.56568	1.01716	0.623608	0.345187	12.6049	6.02334	17.3258	4.85315	17.9314	19.9654	4.31943	6.15066e-08	1.30491e-06
RASSF3	162.157	90.8092	96.6303	110.379	121.736	14.6489	29.9285	19.5309	28.3468	25.9822	-4.82423	-2.2703	6.2201e-08	1.31779e-06
LGALS9B	21.0433	45.4046	48.8237	0	0	0	0	0.315014	0	0	-296.79	-8.2133	6.59364e-08	1.39496e-06
LAPTM5	0	0	0	112.998	96.0769	0	0	0	0	0	-1581.8	-10.6273	7.04757e-08	1.4889e-06
BRSK1	1.23784	1.56568	1.01716	0	0.460249	13.9676	5.55277	11.3405	5.62524	16.4676	23.162	4.53369	7.06732e-08	1.49098e-06
ZCCHC24	27.2325	25.0508	15.2574	7.10913	7.47904	137.632	40.7517	126.951	48.2006	137.23	6.3398	2.66444	7.19597e-08	1.51599e-06
USP18	3.71352	4.69703	9.15445	39.412	36.0145	1.36269	2.25875	0.945043	1.21329	1.82973	-12.5011	-3.64399	7.41276e-08	1.55948e-06
HSPA6	59.4163	59.4957	67.1326	0.249443	0.230124	1.02202	0	0.315014	0	1.82973	-60.2401	-5.91265	7.53897e-08	1.58382e-06
POTEM	33.4217	26.6165	38.6521	0	0.115062	0.340673	0	0	0	0	-252.889	-7.98236	7.65536e-08	1.60602e-06
ZNF90	235.189	242.68	265.479	0.623608	0.345187	6.13211	8.28209	4.72521	6.94883	4.39135	-24.2174	-4.59797	7.78034e-08	1.62997e-06
GFOD1	8.66487	7.82838	19.3261	16.8374	18.8702	2.72538	1.88229	1.26006	2.20598	1.46378	-8.64319	-3.11156	7.86082e-08	1.64454e-06
ELN	0	3.13135	2.03432	0	0	13.2862	32.7519	8.19037	29.7807	5.12324	29.251	4.87042	8.1744e-08	1.70777e-06
SLC48A1	95.3136	57.93	97.6475	12.4722	9.78029	7.4948	4.04693	7.56034	2.64717	6.22108	-9.72838	-3.2822	8.52279e-08	1.77808e-06
B4GALT6	92.8379	79.8494	66.1155	24.9443	30.0312	7.4948	13.0819	5.67026	10.2578	4.7573	-6.78153	-2.76161	8.55943e-08	1.78325e-06
CLEC1A	0	3.13135	4.06864	19.5813	19.6756	0	0	0	0.110299	0	-165.018	-7.36648	8.62398e-08	1.79422e-06
SOGA3_1	0	0	0	0.124722	0.460249	10.5609	4.32928	9.45043	6.50764	10.9784	28.9087	4.85343	8.85676e-08	1.8401e-06
LRATD1	2.47568	3.13135	0	0	0	6.13211	11.6702	9.13541	10.2578	6.58703	37.1954	5.21705	9.46082e-08	1.96289e-06
CASKIN2	143.589	136.214	134.265	27.1893	26.6944	17.0336	9.12913	16.3807	9.04451	18.6632	-6.62508	-2.72794	9.74572e-08	2.01922e-06
SEC16B	0	0	0	2.61915	2.41631	22.8251	12.5173	20.7909	14.008	33.667	10.8201	3.43565	9.87103e-08	2.04186e-06
GALNT18	101.503	40.7076	32.5492	0.124722	0.230124	1.02202	0.470574	0.945043	0.99269	0	-48.5172	-5.60043	9.88214e-08	2.04186e-06
BST2	0	0	0	93.666	101.37	0	0	0	0	0	-1476.01	-10.5275	1.01476e-07	2.09383e-06
TENT5B	0	0	1.01716	0.249443	0.345187	20.0997	3.76459	14.8057	3.08837	11.3443	30.3056	4.92151	1.10694e-07	2.2809e-06
MRC2	0	0	0	53.0067	68.1168	579.144	375.235	543.399	390.238	526.596	19.6515	4.29657	1.10897e-07	2.28196e-06
CDH6	3.71352	1.56568	0	0	0	13.6269	19.3876	7.87535	18.089	5.85514	29.6265	4.88882	1.11214e-07	2.28535e-06
gene:ENSG00000262526	42.0865	34.4449	142.403	0	0	0	0	0	0	0	-1643.25	-10.6823	1.15819e-07	2.37675e-06
TACC2	103.978	106.466	120.025	34.7973	42.573	17.715	10.4467	15.1207	7.83122	16.4676	-5.99892	-2.5847	1.16327e-07	2.38392e-06
GNG11	30.946	39.1419	33.5663	603.154	545.625	13.2862	25.411	19.8459	21.7289	23.0546	-12.1339	-3.60098	1.16568e-07	2.3856e-06
NRROS	17.3297	34.4449	41.7036	3.86637	7.93929	0	0	0	0	0	-766.932	-9.58296	1.17449e-07	2.40036e-06
CADM1	0	0	0	0.74833	0.460249	8.51682	9.03501	6.93031	9.26511	9.88054	16.2888	4.02581	1.1919e-07	2.43263e-06
SPRED3	42.0865	32.8792	31.532	26.0668	32.3325	1.36269	6.21157	5.35524	5.18405	4.39135	-6.35895	-2.66879	1.20005e-07	2.44595e-06
NFIL3	2.47568	4.69703	2.03432	12.8463	15.7635	40.1994	64.3745	54.8125	67.3926	75.7508	6.6703	2.73775	1.20255e-07	2.44774e-06
ATRNL1	99.0271	134.648	139.351	0	0	1.36269	1.03526	1.89009	1.43389	4.02541	-37.9969	-5.24781	1.24449e-07	2.52968e-06
GIMAP6	0	0	0	85.9332	95.8468	0	0	0	0	0	-1376.14	-10.4264	1.31573e-07	2.67089e-06
TMEM256-PLSCR3	85.4109	72.0211	70.1841	0	0	1.02202	0.658803	1.26006	1.32359	0	-51.167	-5.67714	1.35077e-07	2.73831e-06
CDK15	0	0	0	0.124722	0	12.9456	5.55277	14.4907	5.51495	27.08	168.968	7.40061	1.37231e-07	2.77823e-06
GLUD2	35.8973	25.0508	27.4634	0	0.115062	0.340673	0.0941147	0	0.110299	0.365946	-90.6904	-6.50288	1.40067e-07	2.83185e-06
AMOT	11.1406	28.1822	16.2746	0.623608	1.49581	0	0	0.630028	0.110299	0.365946	-52.6815	-5.71922	1.41023e-07	2.84735e-06
MPZL2	0	0	0	81.3185	91.8196	0	0	0	0	0	-1311.04	-10.3565	1.41809e-07	2.85938e-06
SMAD7	8.66487	10.9597	3.05148	2.99332	2.18618	22.4844	30.399	25.2011	29.6704	21.2249	7.86247	2.97498	1.43954e-07	2.89873e-06
BMP2	0	0	0	67.7239	59.257	1.36269	0.376459	0.630028	0.441196	0.365946	-39.5551	-5.30579	1.44322e-07	2.90226e-06
SLC22A17	9.90271	1.56568	2.03432	0.124722	0	55.5297	24.1875	43.1569	28.6777	48.3049	17.0853	4.09469	1.44904e-07	2.91008e-06
PLXND1	172.06	408.641	444.499	447.377	540.562	81.0802	79.621	78.1235	87.467	61.8449	-5.19688	-2.37765	1.49087e-07	2.99008e-06
HGF	0	0	0	0.74833	2.07112	15.671	7.52918	15.4357	11.1402	38.0584	16.9634	4.08435	1.52805e-07	3.06057e-06
ZNF655	29.7081	20.3538	20.3432	20.9532	19.1003	121.62	70.1155	93.2442	68.6059	106.124	4.26716	2.09327	1.56974e-07	3.13989e-06
PLAC9	0	0	0	0.873052	0.690373	15.3303	5.55277	11.6555	7.05913	12.8081	15.2942	3.93492	1.57394e-07	3.14411e-06
CYP26B1	3.71352	10.9597	17.2917	3.11804	1.841	0.340673	0.0941147	0.315014	0	0	-47.9553	-5.58362	1.58506e-07	3.16214e-06
SIX4	2.47568	7.82838	6.10297	3.24276	4.48743	23.5064	35.5754	21.736	37.9428	29.6416	7.14864	2.83767	1.65676e-07	3.30079e-06
GALNT1	507.514	839.202	884.93	713.034	719.829	69.8379	165.171	78.7535	167.434	100.269	-6.27383	-2.64935	1.69598e-07	3.37445e-06
TDRP	0	0	0	0.124722	0	10.2202	10.7291	8.19037	13.7874	6.95298	134.328	7.06962	1.78584e-07	3.54856e-06
TCN2	21.0433	10.9597	15.2574	38.539	32.7927	5.11009	3.29401	4.4102	3.19867	2.19568	-7.11255	-2.83037	1.79148e-07	3.55507e-06
BGN	0	0	0	39.7862	37.5103	382.916	148.607	370.142	155.301	268.97	16.7346	4.06476	1.82453e-07	3.61588e-06
LHFPL4	42.0865	20.3538	32.5492	0	0	0	0.188229	0	0	0.365946	-141.904	-7.14877	1.94813e-07	3.85577e-06
KIAA1217	35.8973	45.4046	52.8924	13.7194	16.7991	8.51682	0.847032	4.09518	1.32359	1.82973	-10.0886	-3.33465	1.98438e-07	3.92235e-06
SH3D21	1.23784	0	0	10.1025	12.3117	53.8263	62.2098	40.9518	68.9368	37.3265	9.30439	3.21791	2.01062e-07	3.96899e-06
PRKAA2	0	0	0	0.623608	0.115062	6.81346	9.69381	3.78017	10.8093	6.95298	23.7955	4.57261	2.0163e-07	3.97499e-06
ZNF471	0	0	1.01716	1.99555	1.15062	13.9676	17.5994	10.7105	21.0671	13.906	11.4179	3.51323	2.02741e-07	3.99166e-06
GPR63	1.23784	0	2.03432	0.124722	0	7.83548	9.03501	4.72521	7.83122	6.22108	32.102	5.00459	2.06979e-07	4.06977e-06
ATG9B	18.5676	43.8389	39.6693	1.37194	0.920498	0.340673	1.41172	0	1.10299	0	-31.1598	-4.96161	2.14618e-07	4.21156e-06
RFLNA	0	0	0	28.0624	26.8095	0	0.0941147	0	0.220598	0	-105.259	-6.7178	2.1475e-07	4.21156e-06
IGFBP6	0	0	0	14.343	13.8075	70.1786	60.704	70.5632	65.5175	56.3557	10.2631	3.35939	2.1547e-07	4.22018e-06
GIMAP4	0	0	0	36.4187	37.6253	0	0	0	0.110299	0	-268.799	-8.07038	2.18328e-07	4.2706e-06
CASP10	0	0	0	36.7929	29.9162	0	0	0.315014	0	0.365946	-96.1812	-6.58768	2.25168e-07	4.39868e-06
HOXA9	0	0	0	35.5457	38.3157	0	0	0	0.110299	0	-268.139	-8.06684	2.25985e-07	4.40891e-06
DMD	0	0	0	3.99109	5.29286	21.4624	49.4102	10.0805	55.3701	19.3951	12.2904	3.61946	2.28328e-07	4.44885e-06
RASSF2	0	0	0	28.8107	30.7216	0	0.0941147	0.315014	0	0	-116.865	-6.8687	2.30914e-07	4.49342e-06
GK5	0	0	0	11.9733	10.3556	43.2655	77.1741	38.1167	73.9003	44.6454	10.7067	3.42044	2.32194e-07	4.51248e-06
GAS7	85.4109	51.6673	39.6693	0.124722	0	0	0	0	0	0	-1322.93	-10.3695	2.32964e-07	4.5216e-06
CLIP3	13.6162	10.9597	13.2231	19.9555	16.684	80.7395	49.222	91.6691	53.1641	111.614	4.83194	2.2726	2.34587e-07	4.54724e-06
RGPD3	29.7081	20.3538	24.4119	1.12249	1.26568	0	0.470574	1.26006	0.551495	0	-30.1876	-4.91588	2.3918e-07	4.6303e-06
ABCC9	0	0	0	0.374165	0	6.47279	9.22324	5.35524	6.72823	7.31892	40.4693	5.33876	2.40813e-07	4.65593e-06
FOXN3	18.5676	10.9597	14.2403	48.2673	56.8407	141.039	231.334	138.606	235.709	147.476	5.70531	2.51231	2.4155e-07	4.66419e-06
SEMA3C	51.9892	20.3538	29.4977	1.12249	3.22174	119.576	268.415	124.116	304.866	214.078	9.95724	3.31575	2.49814e-07	4.81756e-06
GBP4	9.90271	17.2224	18.3089	16.0891	11.161	0	0	0	0	0	-525.46	-9.03744	2.54395e-07	4.89963e-06
MAL	148.541	25.0508	22.3775	0	0	0	0	0	0	0	-1469.57	-10.5212	2.59529e-07	4.99211e-06
gene:ENSG00000266302	1.23784	7.82838	7.12013	43.7773	43.8387	2.04404	1.12938	0.630028	2.53687	0	-15.9952	-3.99956	2.72199e-07	5.22913e-06
EHD1	486.471	338.186	402.796	172.49	200.668	71.2006	53.9277	75.6034	57.0245	64.7725	-4.93935	-2.30432	2.76664e-07	5.30814e-06
OLFML3	0	0	0	3.86637	1.72593	25.2098	20.3288	19.8459	26.9129	16.4676	9.67551	3.27434	2.8686e-07	5.49676e-06
ACADL	60.6541	64.1927	53.9095	0	0	0	0	0	0	0	-1338.58	-10.3865	2.96069e-07	5.66599e-06
LRFN5	0	1.56568	2.03432	0	0.230124	11.9236	4.14105	13.2306	3.97076	18.2973	26.215	4.71232	2.97155e-07	5.67955e-06
TUBB4A	39.6108	21.9195	23.3947	0	0	0.340673	0.0941147	0	0	0	-159.324	-7.31582	3.10661e-07	5.93015e-06
ARHGAP25	27.2325	28.1822	23.3947	0	0.115062	0	0	0	0	0.365946	-198.643	-7.63403	3.14876e-07	6.00299e-06
BMP4	34.6595	17.2224	9.15445	7.4833	9.08991	0	0	0	0	0	-552.103	-9.10879	3.21379e-07	6.11922e-06
GATA3	2.47568	0	2.03432	17.2116	15.1882	0	0	0	0.110299	0	-133.37	-7.05929	3.23355e-07	6.14905e-06
ZNF331	0	0	0	6.3608	8.97485	44.9688	32.846	47.2521	31.8764	38.0584	9.13785	3.19185	3.26808e-07	6.20688e-06
TLL1	80.4595	40.7076	35.6006	24.5702	23.0124	4.42875	7.62329	6.6153	8.49302	2.19568	-6.54656	-2.71074	3.31222e-07	6.28277e-06
GGT7	0	0	0	1.12249	1.72593	16.3523	13.4584	17.3258	13.0153	12.0762	10.9399	3.45153	3.43718e-07	6.51159e-06
SLC22A23	18.5676	26.6165	35.6006	2.12027	1.03556	1.36269	0.376459	1.26006	0.551495	0.365946	-21.0384	-4.39495	3.44786e-07	6.52362e-06
LARP6	0	0	0	13.2205	12.5418	71.2006	38.8694	75.2884	42.1342	69.1638	10.2002	3.35053	3.48025e-07	6.57662e-06
NMT2	70.5568	82.9808	92.5617	256.927	210.564	23.1658	38.4929	20.1609	37.9428	26.3481	-4.91195	-2.2963	3.50967e-07	6.62389e-06
DACT1	0	0	0	0.873052	0.345187	10.9015	5.92923	15.1207	7.94152	5.48919	17.0532	4.09197	3.54922e-07	6.69014e-06
PCDHGA10	0	0	0	1.49666	1.61087	19.759	10.1644	13.2306	10.8093	22.6887	11.7711	3.55718	3.58686e-07	6.75264e-06
PLEKHG4B	0	0	0	0.498887	0	8.8575	5.55277	11.0255	6.06644	6.58703	31.468	4.97581	3.64555e-07	6.85455e-06
AKR1B15	22.2811	31.3135	22.3775	0	0.115062	0	0	0	0	0.365946	-191.41	-7.58052	3.68358e-07	6.91741e-06
CXCL6	0	0	0	44.0267	48.6713	0	1.12938	0	0.220598	0	-57.7829	-5.85257	3.70671e-07	6.95216e-06
SRGAP1	16.0919	14.0911	15.2574	27.0646	28.4204	87.8936	111.244	90.0941	112.505	77.9465	4.15909	2.05627	3.74672e-07	7.01846e-06
CHRNA1	12.3784	7.82838	10.1716	2.36971	1.26568	0	0.188229	0	0.110299	0	-51.1619	-5.677	3.80524e-07	7.11921e-06
CELSR2	0	0	0	0.873052	0.460249	13.9676	5.64688	12.2856	4.19136	12.0762	16.8268	4.07269	3.95196e-07	7.38452e-06
MSC	0	0	0	0.124722	0	20.4404	4.70574	13.5456	6.39734	6.95298	133.706	7.06292	3.96419e-07	7.39819e-06
DEPDC7	0	1.56568	0	0.124722	0.230124	4.08807	6.87037	6.93031	8.38272	5.48919	29.0912	4.86251	3.99732e-07	7.45076e-06
TMEFF2	0	0	0	1.87082	0.805435	8.8575	12.329	10.7105	12.3535	17.9314	10.7543	3.42684	4.14004e-07	7.70724e-06
TBX5	0	0	0	0	0	45.9908	38.0223	47.8822	43.899	62.9427	1862.67	10.8632	4.19146e-07	7.79332e-06
DDR1	14.8541	4.69703	7.12013	4.6147	5.06274	65.4092	18.8229	57.6476	20.0744	77.5806	6.97387	2.80196	4.30085e-07	7.98683e-06
MFAP4	0	0	0	0	0	71.882	24.7522	65.838	32.097	47.573	1903.26	10.8943	4.35124e-07	8.07045e-06
PIK3CG	4.95136	14.0911	31.532	10.2272	10.2405	0	0	0	0	0	-520.537	-9.02386	4.41898e-07	8.186e-06
PDE4DIP	24.7568	18.7881	19.3261	80.5702	83.8803	307.968	233.31	289.183	236.04	316.909	5.86605	2.55239	4.42485e-07	8.18678e-06
NRN1	0	0	0	34.1737	30.9517	0	0.0941147	0	0	0	-248.207	-7.9554	4.44716e-07	8.20882e-06
DSEL	90.3622	89.2435	64.0812	36.6682	38.6609	341.354	293.732	339.9	288.542	200.172	4.76232	2.25166	4.44767e-07	8.20882e-06
PGAM4	21.0433	17.2224	20.3432	0.873052	0	0	0	0	0.220598	0	-134.98	-7.0766	4.5761e-07	8.43551e-06
MTSS2	16.0919	15.6568	18.3089	26.0668	28.8806	159.435	49.8808	163.177	53.8259	147.842	5.26327	2.39596	4.60214e-07	8.47311e-06
INAFM1	0	0	0	0.74833	0.805435	16.0116	5.27042	17.6408	3.75016	9.88054	16.5917	4.05239	4.66453e-07	8.57749e-06
ARAP3	292.13	310.004	374.315	64.98	66.9662	44.6282	18.2583	42.2119	21.9495	40.2541	-6.61464	-2.72566	4.78503e-07	8.78833e-06
CARD10	49.5136	67.324	92.5617	28.686	25.1986	11.2422	7.71741	12.2856	8.05182	5.48919	-5.74644	-2.52267	4.83321e-07	8.866e-06
PTHLH	3.71352	9.39405	8.13729	4.36526	5.1778	0	0.188229	0.630028	0.220598	0.365946	-18.7462	-4.22853	4.98657e-07	9.13617e-06
ATP1A2	0	1.56568	0	0	0	23.8471	3.57636	10.0805	5.73554	6.58703	110.71	6.79064	5.09475e-07	9.32301e-06
USP6	13.6162	21.9195	19.3261	0.997773	0.805435	0	0.470574	0.630028	0.330897	0.365946	-27.4188	-4.77709	5.21911e-07	9.53898e-06
TRO	0	0	0	0	0	57.5737	24.2816	57.6476	25.8099	65.5043	1813.02	10.8242	5.2261e-07	9.54017e-06
AADAT	0	0	0	0.623608	2.30124	12.6049	17.8818	15.1207	16.8757	10.2465	11.8499	3.56681	5.3402e-07	9.73664e-06
EPHX1	370.114	241.114	235.981	26.441	25.5438	32.3639	17.1289	29.6113	16.3242	23.7865	-7.51992	-2.91072	5.45846e-07	9.94022e-06
gene:ENSG00000260342	51.9892	43.8389	46.7894	0.124722	1.49581	0	0.376459	2.83513	0	0	-44.0843	-5.46219	5.53844e-07	1.00737e-05
MMP15	37.1352	62.627	55.9439	7.4833	6.32842	4.08807	2.35287	6.30028	2.31628	1.82973	-9.86048	-3.30166	5.61639e-07	1.02031e-05
EDARADD	25.9946	28.1822	27.4634	0	0	0.340673	0.0941147	0	0	0.365946	-97.1054	-6.60148	5.64785e-07	1.02479e-05
NHSL1	47.0379	61.0613	43.7379	23.4477	25.6589	9.19817	7.0586	6.6153	7.61062	4.02541	-5.42075	-2.43849	5.66069e-07	1.02588e-05
FZD1	0	0	0	4.11581	4.37236	33.3859	25.3169	34.3365	28.2365	27.446	7.96814	2.99424	5.76188e-07	1.04296e-05
GRB14	0	0	0	56.1247	55.9202	0	0.847032	0	1.10299	0.365946	-44.0594	-5.46138	6.00164e-07	1.08506e-05
ALDH1A2	0	0	0	62.1114	57.8763	0	0	0	0	0	-910.811	-9.83101	6.05906e-07	1.09412e-05
MTX2	155.968	133.082	127.145	43.1537	47.2906	16.0116	25.9757	17.0108	29.3395	19.3951	-4.59258	-2.19931	6.26276e-07	1.12955e-05
AK5	0	0	0	18.3341	11.161	59.9584	73.9742	67.098	74.1209	46.1092	9.85904	3.30145	6.30597e-07	1.13598e-05
FNDC10	0	1.56568	0	0.374165	0.460249	19.759	3.01167	11.9705	4.74285	6.95298	20.6224	4.36614	6.44525e-07	1.15911e-05
KDELR3	1.23784	1.56568	0	39.412	46.0249	182.941	207.146	183.023	216.958	166.14	10.4992	3.3922	6.44979e-07	1.15911e-05
MYEOV	0	0	0	63.1092	55.3449	0	0	0	0	0	-899.268	-9.81261	6.61939e-07	1.18817e-05
COL13A1	65.6055	161.265	251.239	172.116	199.173	29.9792	48.5632	35.5966	45.5534	28.9097	-4.48993	-2.16669	6.87895e-07	1.23329e-05
PYCR1	12.3784	17.2224	10.1716	31.5546	32.1024	116.169	92.6089	132.306	93.5335	95.5119	4.61296	2.20569	6.91408e-07	1.23811e-05
ADAMTSL5	1.23784	0	1.01716	0.124722	0.115062	9.87951	5.64688	8.8204	6.94883	2.92757	27.9847	4.80657	6.98602e-07	1.24951e-05
HOXD9	25.9946	31.3135	30.5148	1.49666	1.15062	0	0	0	0	0	-663.755	-9.37451	7.06471e-07	1.26208e-05
OPLAH	1.23784	0	0	0.124722	0.230124	5.79144	6.11746	7.24533	4.96345	9.14865	26.4593	4.7257	7.23101e-07	1.29026e-05
PGM1	38.373	21.9195	32.5492	16.9621	20.0208	106.29	107.573	84.1088	114.38	80.5081	4.18303	2.06455	7.2548e-07	1.29297e-05
RAPGEF4	18.5676	18.7881	22.3775	4.98887	4.48743	1.02202	0.376459	1.26006	1.54418	1.82973	-10.9695	-3.45543	7.35558e-07	1.30938e-05
CCDC8	0	0	0	0	0	37.8147	39.6223	42.8419	48.8624	31.1054	1602.1	10.6458	7.3807e-07	1.3123e-05
SBSN	1.23784	0	0	0	0	15.3303	2.82344	16.0657	4.63255	7.68487	104.462	6.70683	7.4155e-07	1.31693e-05
CAMKK1	2.47568	3.13135	4.06864	2.99332	4.71755	48.3756	10.4467	43.1569	11.9123	33.3011	8.03016	3.00543	7.56492e-07	1.3403e-05
FSTL3	0	0	0	41.4076	43.2634	295.363	257.874	284.773	270.122	153.697	14.5689	3.86482	7.56397e-07	1.3403e-05
SERPING1	0	0	0	0	0	58.2551	18.4465	75.6034	25.1482	38.7903	1702.05	10.7331	7.65764e-07	1.35513e-05
RORB	82.9352	32.8792	25.429	0	0	0	0	0	0	0	-1056.73	-10.0454	7.86099e-07	1.38948e-05
SEPTIN5	0	1.56568	1.01716	2.36971	3.10668	16.3523	18.5406	21.736	18.6405	18.2973	7.39902	2.88733	7.99312e-07	1.41118e-05
FAM118A	9.90271	9.39405	9.15445	9.60357	9.32004	55.5297	43.5751	43.787	41.0312	42.8157	4.68631	2.22845	8.04223e-07	1.41819e-05
PIK3C2A	474.092	407.076	429.242	655.911	695.666	65.0685	145.219	71.1932	147.47	77.9465	-5.24034	-2.38966	8.12235e-07	1.43064e-05
SLC13A3	0	0	0	0.124722	0.230124	12.2642	3.1999	8.19037	3.86046	7.31892	38.256	5.25761	8.18584e-07	1.44013e-05
PRR29	0	0	0	23.5724	28.5354	0	0.0941147	0	0	0	-198.759	-7.63488	8.23474e-07	1.44704e-05
CA13	11.1406	14.0911	12.2059	3.99109	2.64643	0.681346	0.282344	0.945043	0.661793	0	-14.7593	-3.88355	8.27022e-07	1.45158e-05
GLCCI1	4.95136	12.5254	3.05148	2.24499	3.3368	21.1217	24.6581	22.681	23.7143	21.5908	7.15633	2.83922	8.32938e-07	1.46026e-05
GATA2	30.946	37.5762	64.0812	26.3163	24.7384	7.83548	6.21157	7.24533	6.50764	5.12324	-5.34354	-2.4178	8.60099e-07	1.50612e-05
TTC7B	149.779	169.093	165.797	33.6748	38.0856	23.5064	23.4346	17.9558	21.6186	19.3951	-5.17814	-2.37243	8.84862e-07	1.54769e-05
ENO2	1.23784	1.56568	1.01716	20.2049	22.5522	63.0245	102.773	57.3326	110.078	60.3811	7.73619	2.95162	8.86017e-07	1.54791e-05
LAPTM4B	17.3297	15.6568	26.4462	20.4544	21.6317	83.4649	91.2913	82.5337	91.6584	66.9681	4.02889	2.01038	9.18681e-07	1.60311e-05
KCNIP3	0	0	3.05148	0.124722	0	8.51682	6.11746	8.19037	6.28704	6.58703	28.7163	4.8438	9.21992e-07	1.60557e-05
ZNF516	9.90271	10.9597	18.3089	1.62138	2.64643	57.5737	47.9985	58.2776	48.5315	58.9173	7.02533	2.81257	9.22228e-07	1.60557e-05
TTYH2	1.23784	0	0	0.74833	0.575311	8.51682	7.24683	8.50538	7.94152	5.48919	11.6486	3.54208	9.66113e-07	1.68003e-05
TMEM117	0	0	0	2.12027	1.49581	13.6269	15.4348	17.6408	15.4418	13.54	9.63891	3.26887	9.70743e-07	1.68501e-05
CSF2RB	0	0	0	49.5145	54.9997	0	0	0	0	0	-794.389	-9.6337	9.72339e-07	1.68501e-05
PRR5	50.7514	39.1419	28.4805	0.498887	1.03556	1.02202	0.941147	1.57507	1.54418	0.365946	-20.8818	-4.38418	9.71358e-07	1.68501e-05
ABCG2	68.0811	18.7881	18.3089	0.873052	0.460249	1.36269	0.564688	0.315014	1.43389	0.365946	-24.7474	-4.62921	1.00317e-06	1.73644e-05
TWIST1	0	0	0	0	0	28.9572	43.2928	34.0215	43.6784	31.1054	1456.68	10.5085	1.0061e-06	1.73952e-05
CDKN1C	0	0	0	0.124722	0.690373	17.715	1.03526	17.9558	1.76478	19.7611	36.2667	5.18057	1.0109e-06	1.74581e-05
PPFIA4	2.47568	0	4.06864	0	0	12.9456	28.4226	8.19037	33.8618	11.7103	18.5385	4.21245	1.02493e-06	1.768e-05
CLGN	0	0	0	0.374165	0.115062	10.5609	2.63521	13.2306	2.42658	10.9784	35.3745	5.14464	1.0411e-06	1.79384e-05
GRB10	191.865	211.366	164.78	161.764	153.378	42.9248	45.928	43.472	50.186	24.8843	-4.14308	-2.0507	1.05376e-06	1.81358e-05
SLC26A6	1.23784	0	1.01716	9.47885	7.5941	52.8043	23.2463	45.362	25.1482	44.6454	7.53235	2.9131	1.06179e-06	1.82532e-05
EFS	0	0	0	0	0	45.6502	24.9404	45.6771	26.582	42.4497	1447.38	10.4992	1.08159e-06	1.85722e-05
TMEM45A	0	0	0	7.98219	7.01879	25.2098	39.6223	33.0765	43.3475	27.8119	8.10291	3.01844	1.08578e-06	1.86229e-05
HOXA10	2.47568	6.2627	4.06864	20.0802	23.5877	0	0	0	0	0	-448.477	-8.80889	1.0875e-06	1.86311e-05
SSC5D	0	1.56568	2.03432	1.24722	1.61087	18.0557	8.18798	15.1207	11.2505	11.3443	8.74819	3.12898	1.0899e-06	1.8651e-05
RIMS1	12.3784	7.82838	17.2917	3.86637	5.06274	0.681346	0.376459	0.630028	0.772092	1.46378	-11.3573	-3.50554	1.09957e-06	1.87951e-05
ROBO2	0	0	0	1.49666	0.920498	5.79144	16.5642	3.78017	17.3169	15.0038	12.9781	3.698	1.10666e-06	1.88948e-05
CNTN3	0	0	0	0	0	35.0893	43.0104	29.6113	36.8398	31.8373	1421.14	10.4728	1.11702e-06	1.90501e-05
PDXK	13.6162	4.69703	8.13729	39.2873	43.6086	124.686	134.396	143.646	137.763	105.392	5.5303	2.46736	1.13348e-06	1.9309e-05
NPNT	34.6595	53.233	36.6178	0	0	0	0	0	0	0	-929.992	-9.86107	1.14732e-06	1.95006e-05
RNASE1	0	0	0	54.8775	44.5291	0	0	0	0	0	-755.961	-9.56217	1.14706e-06	1.95006e-05
SCN5A	0	1.56568	0	16.3385	15.0731	0	0.282344	0	0.110299	0	-52.3156	-5.70917	1.15621e-06	1.96294e-05
MACROH2A2	0	1.56568	0	0.124722	0	6.47279	5.55277	4.72521	8.38272	4.39135	47.1923	5.56048	1.19143e-06	2.02046e-05
PAK3	55.7028	26.6165	33.5663	0.124722	0	0	0	0	0	0	-865.518	-9.75742	1.21459e-06	2.05742e-05
MARCKSL1	783.552	751.524	865.604	89.0513	107.353	64.3872	69.6449	76.5484	67.8338	83.0698	-7.17068	-2.84211	1.2189e-06	2.0624e-05
AIF1L	3.71352	12.5254	21.3604	0.873052	0.805435	0	0.188229	0.315014	0	0	-58.1134	-5.8608	1.24218e-06	2.09943e-05
GIMAP1	0	0	0	17.8352	21.7468	0.340673	0	0	0.110299	0	-75.3727	-6.23597	1.24543e-06	2.10255e-05
DDX58	38.373	29.7478	35.6006	80.0713	78.3574	10.2202	13.0819	8.50538	13.6771	8.78271	-4.93765	-2.30382	1.30464e-06	2.20004e-05
CPM	0	1.56568	0	4.98887	2.53137	31.6826	19.4817	23.6261	20.5156	26.3481	7.88956	2.97995	1.35758e-06	2.28676e-05
SCN1B	58.1784	56.3643	39.6693	21.951	19.1003	8.8575	3.48224	8.19037	4.52226	7.68487	-5.90765	-2.56258	1.37854e-06	2.31947e-05
MEIS2	337.93	263.033	217.672	39.9109	42.2278	33.7266	31.999	28.3513	31.2146	30.0076	-5.76049	-2.52619	1.39955e-06	2.35219e-05
SEZ6L2	1.23784	1.56568	3.05148	1.24722	0.690373	15.3303	6.58803	17.0108	7.72092	13.54	9.62402	3.26664	1.41511e-06	2.37568e-05
LIPG	0	0	0	58.9933	65.0101	0.681346	1.78818	0.315014	1.10299	0.365946	-27.8686	-4.80057	1.44117e-06	2.41673e-05
RPSAP58	7.42703	15.6568	9.15445	13.2205	13.3472	79.3768	33.1284	80.6436	35.9574	87.0952	5.22033	2.38414	1.44689e-06	2.42362e-05
RNF130	251.281	205.103	178.003	38.539	37.05	25.2098	23.9992	24.5711	28.788	25.2503	-5.50098	-2.45969	1.44993e-06	2.42601e-05
KLHL6	0	9.39405	6.10297	19.0824	22.207	0	0	0	0	0	-441.922	-8.78765	1.47865e-06	2.47131e-05
FYN	294.606	220.76	275.651	123.1	134.278	51.7823	47.2456	42.8419	41.1415	42.4497	-4.59629	-2.20047	1.48223e-06	2.47455e-05
SPAAR	1.23784	0	0	15.3408	14.3828	0.340673	0	0	0.110299	0	-61.7227	-5.94773	1.48958e-06	2.48407e-05
UNC13D	1.23784	4.69703	0	22.9488	19.5606	1.02202	0.188229	0.315014	0.551495	0.731892	-18.4011	-4.20172	1.52394e-06	2.53854e-05
RPH3AL	4.95136	9.39405	8.13729	4.6147	4.48743	0.681346	0.376459	0.315014	0.220598	0	-14.4606	-3.85406	1.54708e-06	2.57424e-05
LGALS3	21.0433	17.2224	22.3775	27.8129	27.2697	121.961	54.8689	114.35	71.2531	142.353	4.17357	2.06128	1.59305e-06	2.64782e-05
EML6	24.7568	21.9195	13.2231	7.60802	4.2573	2.04404	0.658803	0.630028	0.330897	3.29351	-10.6562	-3.41362	1.59842e-06	2.65379e-05
PALD1	3.71352	3.13135	4.06864	3.99109	4.02718	0	0	0.315014	0	0.365946	-41.2177	-5.36519	1.60104e-06	2.65522e-05
FRK	21.0433	12.5254	22.3775	0.498887	0.115062	0.681346	0.282344	0	0.220598	0	-41.5953	-5.37835	1.60404e-06	2.65726e-05
HES2	0	0	0	29.6838	30.4915	0.681346	0.470574	0	0.220598	0	-39.9814	-5.32126	1.64559e-06	2.72311e-05
TGFB3	50.7514	32.8792	21.3604	4.24054	3.79705	4.08807	1.03526	1.57507	1.21329	2.19568	-11.076	-3.46937	1.65232e-06	2.73124e-05
SERPINB2	0	0	0	1019.6	820.048	8.8575	12.9878	11.6555	10.3681	7.68487	-35.6003	-5.15382	1.69298e-06	2.79538e-05
HOXD4	21.0433	15.6568	18.3089	2.99332	3.22174	0	0	0	0	0	-435.401	-8.7662	1.70284e-06	2.80857e-05
PNLDC1	0	0	0	19.9555	18.2949	0	0	0	0	0.365946	-98.5353	-6.62257	1.79885e-06	2.96367e-05
C12orf75	0	0	0	37.1671	34.9789	168.974	167.43	174.203	150.117	105.392	10.3238	3.36791	1.84414e-06	3.03497e-05
GXYLT2	0	0	0	0	0.115062	6.47279	6.3998	8.19037	6.50764	9.88054	90.455	6.49913	1.84855e-06	3.03889e-05
GGTA1	21.0433	10.9597	8.13729	0.623608	0.460249	0	0	0	0	0.365946	-109.244	-6.77141	1.85372e-06	3.04407e-05
MRGPRF	0	0	0	0	0	58.5957	11.5761	54.8125	12.2432	39.8881	1394.92	10.446	1.86725e-06	3.06295e-05
HLA-DPB1	0	0	0	1.62138	1.26568	10.2202	11.3879	11.3405	11.5814	9.5146	8.72887	3.12579	1.88525e-06	3.08849e-05
CGB7	0	0	0	0	0.345187	6.13211	6.87037	5.98527	5.84584	2.92757	32.9912	5.04401	1.88693e-06	3.08849e-05
COLEC12	1.23784	0	1.01716	13.5947	13.4623	0	0	0	0.110299	0	-107.598	-6.74951	1.89611e-06	3.10013e-05
EDEM2	90.3622	95.5062	99.6818	49.6392	46.0249	18.0557	11.9526	22.996	11.9123	19.3951	-4.47897	-2.16317	1.90145e-06	3.1055e-05
ZCCHC2	24.7568	50.1016	33.5663	59.7417	58.2215	11.2422	10.8232	10.0805	10.2578	9.5146	-4.58506	-2.19694	1.90372e-06	3.10583e-05
NIPAL3	0	0	1.01716	37.7907	46.8303	364.861	79.7152	366.677	73.4591	256.528	13.0093	3.70148	1.90663e-06	3.10721e-05
gene:ENSG00000250424	38.373	57.93	16.2746	0	0	0	0	0	0	0	-839.621	-9.71359	1.91705e-06	3.12081e-05
ADARB1	33.4217	54.7986	48.8237	42.7795	47.4056	167.952	211.664	165.067	193.133	120.762	3.81177	1.93046	1.93001e-06	3.13851e-05
HOXD3	7.42703	9.39405	9.15445	1.62138	2.41631	0	0	0	0	0.365946	-80.6794	-6.33413	1.93493e-06	3.14311e-05
H2AW	28.4703	25.0508	27.4634	2.12027	2.41631	1.02202	0.470574	1.57507	0.661793	2.56162	-13.6332	-3.76905	1.94679e-06	3.15897e-05
FAM181B	29.7081	46.9703	32.5492	0	0	0	0	0	0	0	-814.942	-9.67055	1.94945e-06	3.15987e-05
RGS2	141.114	57.93	58.9953	24.4454	30.8367	12.6049	11.5761	7.56034	10.8093	12.8081	-5.54281	-2.47062	2.03443e-06	3.29407e-05
HIPK3	351.546	331.923	267.513	113.247	110.23	40.1994	53.7395	40.6368	62.3189	49.4027	-4.71663	-2.23776	2.06499e-06	3.33996e-05
MXI1	6.18919	15.6568	5.08581	4.6147	3.79705	29.9792	23.3404	28.0363	30.1116	38.4243	5.85615	2.54995	2.07363e-06	3.35032e-05
S1PR1	360.211	259.902	236.999	228.241	234.267	28.2759	91.3854	22.366	83.7169	15.7357	-5.42218	-2.43887	2.08135e-06	3.352e-05
HEY1	0	0	0	3.24276	3.79705	23.1658	9.69381	28.6663	12.1329	31.8373	9.18487	3.19926	2.07926e-06	3.352e-05
SH3BP1	2.47568	1.56568	4.06864	0.498887	0.230124	12.2642	6.77626	14.1756	7.39003	12.4422	11.8778	3.5702	2.0773e-06	3.352e-05
CRACDL	3.71352	1.56568	0	4.86414	5.1778	0	0.0941147	0.315014	0	0	-47.5758	-5.57215	2.11587e-06	3.40082e-05
C21orf58	0	0	0	1.99555	1.95606	25.8911	8.28209	19.5309	8.71361	16.8335	10.6392	3.41132	2.11619e-06	3.40082e-05
KCTD11	4.95136	1.56568	4.06864	4.98887	4.37236	20.0997	29.6461	21.736	29.5601	20.8589	5.58014	2.4803	2.12115e-06	3.40516e-05
SIGIRR	23.5189	18.7881	20.3432	22.8241	26.2342	5.45077	3.1999	6.6153	4.30166	6.58703	-5.21527	-2.38274	2.12734e-06	3.41146e-05
ASRGL1	0	0	3.05148	11.9733	10.4707	0	0	0	0.220598	0.365946	-40.5994	-5.34339	2.15962e-06	3.45954e-05
SYT9	0	0	0	21.2027	19.5606	0	0.0941147	0	0	0	-155.851	-7.28402	2.16628e-06	3.46651e-05
SH3TC2	43.3244	51.6673	47.8066	4.24054	4.48743	3.40673	1.88229	3.46516	3.41927	2.56162	-9.9906	-3.32057	2.17474e-06	3.47635e-05
gene:ENSG00000230626	39.6108	23.4851	30.5148	0	0.345187	0	0	0	0	0	-698.64	-9.44841	2.18335e-06	3.48641e-05
ZNF662	0	0	0	0.249443	0.460249	8.51682	4.70574	6.30028	5.40465	6.95298	17.364	4.11803	2.18754e-06	3.4894e-05
LNPK	4.95136	9.39405	7.12013	22.6993	23.9329	51.7823	122.067	47.5671	120.116	49.0368	5.32387	2.41248	2.21084e-06	3.51981e-05
EPHA4	14.8541	54.7986	80.3557	44.7751	56.6106	10.5609	6.30568	11.9705	7.16943	15.0038	-5.03746	-2.3327	2.21129e-06	3.51981e-05
NTNG1	0	0	0	0	0.230124	7.83548	5.64688	7.24533	5.07375	3.65946	43.9874	5.45902	2.26214e-06	3.59695e-05
GIMAP7	1.23784	0	1.01716	31.5546	35.209	0	0	0	0	0	-531.035	-9.05266	2.29841e-06	3.65075e-05
PARD6A	11.1406	9.39405	9.15445	0.623608	1.49581	0	0.0941147	0	0.220598	0	-48.7974	-5.60873	2.31892e-06	3.67945e-05
OAS2	0	1.56568	0	17.3363	13.5773	0	0.0941147	0	0	0	-122.906	-6.94141	2.36639e-06	3.75082e-05
PLD5	0	0	0	0	0	30.6606	38.6811	18.2708	31.2146	26.3481	1160.06	10.18	2.36949e-06	3.75178e-05
ERMP1	39.6108	46.9703	71.2013	76.8285	74.2151	10.5609	18.8229	11.6555	16.8757	12.4422	-4.39886	-2.13713	2.38739e-06	3.77614e-05
OSR1	0	0	0	0	0	25.8911	28.2344	33.3915	28.4571	26.7141	1125.86	10.1368	2.40642e-06	3.80225e-05
NTN1	24.7568	28.1822	29.4977	0.374165	0	0	0.282344	0.630028	0.220598	1.09784	-36.1426	-5.17563	2.45996e-06	3.88275e-05
SHC3	0	0	0	13.7194	14.728	54.167	69.6449	52.9224	70.3707	33.3011	8.88503	3.15138	2.47348e-06	3.90001e-05
PRPH2	0	0	0	0.124722	0.115062	6.13211	5.45865	6.93031	5.18405	4.39135	42.6139	5.41325	2.4983e-06	3.93502e-05
ABCA4	21.0433	25.0508	14.2403	0.873052	1.95606	0	0	0	0	0	-456.156	-8.83338	2.52421e-06	3.97168e-05
FILIP1L	253.757	147.173	131.214	98.5301	88.9431	20.4404	51.5749	18.9009	49.6345	9.88054	-4.71569	-2.23747	2.55674e-06	4.01864e-05
ARHGAP11A-SCG5	0	0	0	1.87082	2.30124	22.4844	17.8818	12.2856	12.7947	13.54	8.97356	3.16568	2.57447e-06	4.04229e-05
C1QTNF1	0	0	0	2.36971	0.920498	9.87951	18.5406	6.93031	19.0817	11.3443	10.645	3.41211	2.63545e-06	4.13373e-05
UBE2B	167.108	195.709	160.711	75.3319	75.5959	29.9792	39.7164	25.2011	40.8106	28.1778	-4.0196	-2.00705	2.64017e-06	4.13682e-05
PRSS35	0	0	0	0.623608	1.03556	24.1878	1.12938	19.8459	1.87508	18.6632	22.9217	4.51864	2.68651e-06	4.20504e-05
HNRNPA1L2	66.8433	112.729	102.733	7.60802	5.52299	5.11009	7.90563	0.630028	9.7063	6.22108	-9.77845	-3.28961	2.74391e-06	4.29043e-05
PLXDC2	0	0	0	0	0	27.5945	23.2463	32.4465	28.0159	30.3735	1093.33	10.0945	2.74878e-06	4.29358e-05
OAS1	2.47568	14.0911	14.2403	9.47885	7.5941	0	0	0	0	0	-330.444	-8.36826	2.75513e-06	4.29903e-05
FTSJ1	6.18919	17.2224	10.1716	24.0713	25.5438	95.0477	61.8334	105.215	62.2086	69.1638	4.2926	2.10185	2.77696e-06	4.3286e-05
EFNA5	17.3297	3.13135	7.12013	13.3452	11.3912	2.72538	0.752918	2.52011	0.882391	1.09784	-7.92494	-2.9864	2.78344e-06	4.33421e-05
STX1B	0	0	0	0.124722	0.115062	8.8575	4.42339	5.35524	4.96345	5.85514	42.4802	5.40872	2.8313e-06	4.40418e-05
TMEM238	22.2811	17.2224	14.2403	0	0.115062	0.340673	0.0941147	0.315014	0.110299	0	-56.1276	-5.81064	2.85103e-06	4.43028e-05
ARL8A	128.735	103.335	109.853	54.5034	52.8135	21.4624	20.517	21.106	22.2804	27.08	-3.89439	-1.9614	2.88828e-06	4.48354e-05
DBNDD2	33.4217	26.6165	24.4119	18.7082	17.1443	1.02202	2.44698	6.93031	2.31628	6.58703	-6.32021	-2.65997	2.89303e-06	4.48629e-05
STYK1	1.23784	1.56568	1.01716	23.1982	25.1986	0	1.12938	0.630028	0.772092	0.365946	-16.9457	-4.08284	2.93874e-06	4.55247e-05
SMAD1	25.9946	34.4449	33.5663	91.421	85.6063	11.2422	12.329	8.19037	15.4418	8.78271	-4.93158	-2.30205	2.94309e-06	4.55452e-05
CSGALNACT1	122.546	90.8092	82.3901	2.99332	2.99162	3.06606	6.68214	2.83513	5.18405	9.88054	-10.7756	-3.4297	2.94766e-06	4.55691e-05
CPEB4	174.535	136.214	131.214	41.9065	50.0521	20.0997	33.0343	15.1207	31.6558	15.7357	-4.52058	-2.17651	2.9514e-06	4.558e-05
LLGL2	8.66487	17.2224	12.2059	0.249443	0.690373	0	0.188229	0	0	0.365946	-56.4383	-5.8186	2.96429e-06	4.57322e-05
USHBP1	23.5189	10.9597	19.3261	1.49666	2.18618	0	0	0	0	0	-414.743	-8.69607	2.97199e-06	4.5804e-05
CACNA1H	0	0	0	0	0.115062	12.9456	4.89396	12.6006	4.30166	3.29351	98.4982	6.62203	2.98189e-06	4.59095e-05
AFAP1L2	35.8973	14.0911	8.13729	0	0	0	0	0	0	0.365946	-143.487	-7.16477	2.98677e-06	4.59376e-05
PTGS2	394.871	68.8897	66.1155	179.474	159.361	2.38471	43.1045	7.24533	49.8551	3.29351	-8.14205	-3.02539	3.01261e-06	4.62877e-05
PDE3B	58.1784	59.4957	47.8066	0.124722	0.345187	2.38471	0.752918	1.57507	1.65448	0.731892	-22.8734	-4.5156	3.02769e-06	4.64719e-05
ID1	22.2811	18.7881	16.2746	30.6815	27.1547	56.211	125.173	79.6986	133.02	68.4319	3.8577	1.94774	3.03783e-06	4.65801e-05
COL5A1	134.924	120.557	131.214	497.265	694.745	3020.41	1838.62	2690.54	2019.13	1774.84	7.15336	2.83862	3.05647e-06	4.68181e-05
ZHX3	19.8054	28.1822	24.4119	26.6904	31.7572	115.829	103.526	110.57	103.46	98.8054	3.70379	1.889	3.09108e-06	4.73002e-05
FZD2	6.18919	14.0911	9.15445	0	0.115062	96.4104	36.6106	97.0244	37.7222	74.2871	12.389	3.63099	3.09764e-06	4.73524e-05
TMOD2	0	0	0	9.2294	12.5418	51.4416	36.7988	43.787	35.0751	35.1308	7.85694	2.97397	3.11978e-06	4.75941e-05
PPARA	0	0	0	9.10468	8.5146	42.2434	20.6111	48.5122	22.1701	51.5984	8.60284	3.10481	3.11863e-06	4.75941e-05
CARMIL2	2.47568	3.13135	0	0.498887	0.805435	7.4948	9.41147	5.67026	9.15481	6.22108	10.171	3.34639	3.16537e-06	4.82406e-05
TMEM88	11.1406	10.9597	15.2574	3.86637	1.61087	1.36269	0.0941147	0.315014	0.661793	0.365946	-14.7056	-3.87829	3.17305e-06	4.83087e-05
KIF26A	21.0433	23.4851	19.3261	0.623608	0.690373	0	0	0	0	0	-475.605	-8.89362	3.30798e-06	5.03121e-05
PYGO1	1.23784	0	0	3.36748	5.29286	13.2862	38.3988	13.5456	39.1561	13.1741	8.66608	3.11538	3.3707e-06	5.12142e-05
PORCN	4.95136	1.56568	4.06864	4.36526	5.98323	41.5621	15.5289	46.9371	14.4492	28.5438	6.32307	2.66063	3.40879e-06	5.17406e-05
COL4A6	4.95136	1.56568	2.03432	50.3875	49.7069	1.36269	1.50584	0.630028	1.76478	3.65946	-12.4735	-3.6408	3.43318e-06	5.20583e-05
ANO1	1.23784	12.5254	19.3261	0.623608	0.920498	0	0.0941147	0	0.110299	0	-76.1714	-6.25118	3.47767e-06	5.26799e-05
AVPI1	1.23784	0	1.01716	0.873052	1.03556	22.1437	2.72933	23.3111	2.75747	14.2719	13.8987	3.79688	3.50852e-06	5.30403e-05
GRIA3	28.4703	34.4449	30.5148	0	0	0	0	0	0	0	-696.315	-9.4436	3.5051e-06	5.30403e-05
PARD3B	4.95136	1.56568	0	34.5479	43.2634	2.04404	1.12938	0	0.882391	1.09784	-16.4661	-4.04143	3.5243e-06	5.32254e-05
RARB	0	1.56568	0	27.1893	25.5438	0.681346	0.0941147	0.315014	0.330897	1.09784	-22.6637	-4.50231	3.53546e-06	5.33405e-05
SPATA6	43.3244	73.5867	64.0812	2.36971	3.79705	3.7474	2.63521	4.4102	3.63986	3.29351	-10.3481	-3.37129	3.5659e-06	5.37457e-05
ADGRB2	0	0	0	0.498887	1.38075	13.9676	5.83511	11.9705	6.61793	7.31892	11.1918	3.48437	3.58317e-06	5.3952e-05
PEG10	0	3.13135	2.03432	36.5434	34.5187	162.16	87.6208	152.152	88.2391	138.694	7.8944	2.98083	3.58758e-06	5.39644e-05
FAM78B	14.8541	18.7881	19.3261	0	0.345187	0	0	0	0.551495	0	-64.2663	-6.00599	3.62954e-06	5.44964e-05
KIRREL3	0	0	0	0	0	24.8691	36.14	26.7762	28.2365	14.2719	1042.26	10.0255	3.63382e-06	5.44964e-05
CYGB	0	0	0	0.374165	0.115062	7.4948	1.88229	8.8204	3.30897	11.7103	29.0541	4.86067	3.63133e-06	5.44964e-05
TRERF1	9.90271	7.82838	6.10297	0.249443	0.115062	56.211	27.1991	55.7575	29.6704	47.9389	10.0297	3.32621	3.66009e-06	5.48357e-05
APCDD1	24.7568	10.9597	17.2917	0	0	0.340673	0	0	0	0	-134.196	-7.0682	3.68972e-06	5.52246e-05
DPY19L2	0	0	0	0.498887	0.345187	4.76942	12.1408	1.89009	12.7947	2.92757	20.049	4.32546	3.69581e-06	5.52608e-05
gene:ENSG00000288841	17.3297	25.0508	27.4634	0	0.575311	0	0	0	0.99269	0	-54.1384	-5.75858	3.82127e-06	5.708e-05
APOL3	0	0	0	19.0824	13.3472	0	0.0941147	0.315014	0.110299	0.365946	-36.0911	-5.17357	3.83916e-06	5.72903e-05
SAT1	180.724	169.093	197.329	267.403	177.311	33.3859	61.1746	39.3768	70.481	39.1562	-4.04537	-2.01627	3.90128e-06	5.81596e-05
SDC4	0	0	1.01716	31.3051	36.7048	105.949	200.841	98.9145	197.876	84.1676	9.61837	3.26579	3.98989e-06	5.94218e-05
KIAA0040	0	0	0	16.4633	17.7196	0	0.0941147	0	0	0	-131.102	-7.03455	4.03841e-06	6.00848e-05
FNBP1L	107.692	147.173	181.055	155.653	173.399	25.5505	59.1981	32.1314	55.9215	35.1308	-3.64556	-1.86614	4.05069e-06	6.02079e-05
CLMN	0	0	0	13.3452	16.1087	0	0.0941147	0	0.110299	0	-75.0029	-6.22887	4.07357e-06	6.04882e-05
CLEC11A	0	0	0	7.4833	6.67361	48.0349	32.7519	38.7467	35.1854	38.4243	6.9238	2.79156	4.20156e-06	6.23273e-05
GRIK5	11.1406	20.3538	19.3261	0	0.115062	0	0	0.315014	0.110299	0.365946	-60.568	-5.92048	4.23344e-06	6.27384e-05
SORCS2	9.90271	31.3135	24.4119	0	0.575311	0.681346	0.564688	0	0.110299	0.365946	-35.1132	-5.13394	4.29686e-06	6.34283e-05
OSMR	0	1.56568	0	27.0646	34.9789	90.2783	173.736	85.0538	187.067	77.5806	9.28802	3.21537	4.29595e-06	6.34283e-05
FAM124A	0	0	0	18.5835	22.3221	0.340673	0.0941147	0.630028	0	0	-38.3421	-5.26086	4.29297e-06	6.34283e-05
ARID3A	2.47568	1.56568	0	8.48107	9.66522	37.474	30.2108	42.2119	30.6631	50.1346	6.24784	2.64336	4.29116e-06	6.34283e-05
EPS8	50.7514	56.3643	58.9953	23.8218	23.0124	145.808	158.677	151.837	167.434	172.727	3.97722	1.99176	4.37978e-06	6.45889e-05
LTBP1	163.395	183.184	190.209	208.659	243.357	868.375	1230.36	857.784	1259.72	1133.7	5.34235	2.41747	4.42987e-06	6.52636e-05
RASL10B	0	0	0	0.124722	0.230124	4.76942	4.79985	3.15014	7.16943	4.02541	28.092	4.81209	4.44689e-06	6.54503e-05
TNFRSF11A	1.23784	0	0	12.4722	11.8514	0.340673	0	0	0.220598	0	-40.41	-5.33664	4.45707e-06	6.55359e-05
LMF2	16.0919	4.69703	10.1716	39.1626	42.6881	149.555	68.6096	171.053	68.3853	150.404	5.1162	2.35507	4.50547e-06	6.61829e-05
SELENBP1	0	0	0	1.49666	0.230124	10.2202	6.3998	10.3955	6.94883	10.6124	11.6772	3.54562	4.51479e-06	6.62551e-05
COMP	0	0	0	0.124722	0	2.72538	10.0703	4.72521	9.9269	4.39135	86.0958	6.42787	4.53853e-06	6.65385e-05
PLA2G4C	0	0	0	26.8152	19.4455	0.340673	0.376459	0	0.551495	0	-31.6832	-4.98565	4.56834e-06	6.69103e-05
INSYN1	11.1406	23.4851	23.3947	0.124722	0.460249	0	0.282344	0.945043	0	0.365946	-35.2511	-5.1396	4.59463e-06	6.723e-05
PDE5A	0	0	0	13.0958	11.3912	52.4636	23.9992	44.732	23.3834	116.737	9.61572	3.2654	4.66148e-06	6.81419e-05
DENND2A	0	0	0	0	0.115062	7.4948	4.14105	8.8204	5.07375	6.58703	78.7456	6.29913	4.72176e-06	6.89561e-05
gene:ENSG00000284299	14.8541	21.9195	16.2746	0	0	0	0	0	0.110299	0	-183.3	-7.51806	4.74292e-06	6.91978e-05
KCNAB3	1.23784	1.56568	0	0.498887	0.345187	5.45077	5.64688	8.19037	6.72823	4.02541	12.3531	3.62681	4.87172e-06	7.10081e-05
MAB21L2	0	0	0	0.124722	0	5.11009	6.11746	8.8204	4.63255	6.22108	76.8656	6.26427	5.00287e-06	7.28492e-05
DLL4	22.2811	61.0613	37.635	9.35412	12.0815	1.02202	6.11746	0.315014	5.40465	1.46378	-9.19535	-3.20091	5.02862e-06	7.30826e-05
ZIK1	0	1.56568	1.01716	0.74833	0.805435	8.17615	6.02334	8.50538	7.05913	10.2465	9.13498	3.1914	5.02811e-06	7.30826e-05
MAPRE2	42.0865	25.0508	33.5663	353.835	334.256	27.5945	26.4462	25.2011	23.0525	25.9822	-6.18226	-2.62813	5.11147e-06	7.42149e-05
PCDHGB2	1.23784	0	3.05148	4.86414	4.60249	26.9132	24.4698	31.8164	26.2511	13.54	6.1647	2.62403	5.14713e-06	7.45888e-05
NUDT11	0	0	0	3.49221	4.02718	25.8911	24.4698	17.6408	24.8173	14.6378	7.18469	2.84493	5.147e-06	7.45888e-05
SOX11	0	0	0	0	0	20.781	28.3285	17.3258	32.5382	17.1995	934.847	9.86859	5.20668e-06	7.5359e-05
FAM180A	0	0	0	0	0.115062	7.83548	4.14105	8.8204	4.74285	6.22108	78.087	6.28701	5.2103e-06	7.5359e-05
CHRM3	19.8054	31.3135	20.3432	0.124722	0.115062	0	0	0	0	0	-529.237	-9.04777	5.22192e-06	7.54545e-05
CLEC2B	0	0	0	27.314	23.4727	0.340673	0.282344	0	0.551495	0.731892	-25.7581	-4.68695	5.24691e-06	7.57428e-05
ARFGAP1	34.6595	26.6165	43.7379	53.755	52.9286	191.458	119.526	189.324	129.601	205.296	3.7352	1.90118	5.27613e-06	7.60916e-05
PITPNA	743.941	789.1	808.643	142.931	146.014	81.4208	108.42	88.519	101.916	85.2654	-5.63358	-2.49405	5.33625e-06	7.68114e-05
C1QL1	0	0	0	0	0.230124	4.08807	8.18798	8.19037	9.04451	0.731892	49.7635	5.63702	5.33255e-06	7.68114e-05
STK26	1.23784	0	0	12.8463	13.1171	0	0.376459	0	0.110299	0	-37.0875	-5.21286	5.36863e-06	7.72036e-05
MPZL3	0	1.56568	0	27.4388	27.1547	1.02202	0.282344	0.945043	0.220598	0	-23.1168	-4.53087	5.40884e-06	7.77075e-05
SLC4A3	1.23784	0	0	0.124722	0.230124	6.47279	4.42339	6.93031	3.63986	5.48919	21.2152	4.40703	5.42076e-06	7.78044e-05
ERC2	13.6162	1.56568	0	4.6147	4.14224	0	0	0	0.110299	0	-78.7788	-6.29974	5.57158e-06	7.98169e-05
DEF6	44.5622	46.9703	54.9267	0.498887	0.690373	1.36269	1.97641	0.630028	2.86777	1.46378	-17.0039	-4.08779	5.5707e-06	7.98169e-05
GAS1	0	0	0	0	0	20.0997	16.9406	29.6113	22.501	27.8119	909.555	9.82902	5.58951e-06	7.99976e-05
MYOCD	0	0	0	0	0	44.9688	17.5994	33.0765	17.8684	9.14865	966.692	9.91691	5.59664e-06	8.00235e-05
WDR90	4.95136	3.13135	2.03432	2.74388	4.60249	29.6385	11.9526	29.6113	12.2432	29.2757	6.20372	2.63313	5.80683e-06	8.29499e-05
NFATC4	0	1.56568	0	11.7238	14.4978	78.0141	13.929	76.5484	14.3389	117.835	9.94318	3.31371	5.97561e-06	8.528e-05
CELSR3	0	0	0	1.37194	0.345187	9.53884	4.23516	8.50538	6.94883	11.3443	11.0042	3.45998	6.02444e-06	8.58954e-05
AFAP1L1	118.833	156.568	134.265	78.0758	80.0833	21.1217	38.3988	27.7212	35.1854	22.3227	-3.78732	-1.92118	6.04374e-06	8.60889e-05
FCHSD2	168.346	183.184	150.54	107.76	110.345	26.5725	58.8217	24.8861	55.5906	27.8119	-3.63893	-1.86351	6.1064e-06	8.68992e-05
STBD1	0	0	0	1.7461	2.07112	9.19817	14.3054	12.9156	16.7654	9.88054	8.06303	3.01132	6.12501e-06	8.70816e-05
GCLM	210.433	108.032	185.123	96.5346	85.7213	36.452	32.1872	49.7722	31.3249	38.4243	-3.61728	-1.8549	6.16717e-06	8.75983e-05
RECQL4	1.23784	0	0	6.3608	8.39954	43.2655	22.3993	46.3071	16.7654	28.1778	7.48143	2.90331	6.23269e-06	8.84454e-05
PMCH	0	0	0	41.7818	20.366	0	0	0	0	0	-475.951	-8.89467	6.25552e-06	8.86857e-05
SULF1	16.0919	20.3538	23.3947	3.36748	4.14224	2.38471	0.658803	1.57507	0.441196	1.82973	-9.84204	-3.29896	6.27939e-06	8.89403e-05
KCNQ1	17.3297	29.7478	25.429	0	0.115062	0	0	0	0	0	-538.192	-9.07198	6.36364e-06	9.00487e-05
TGFA	13.6162	28.1822	22.3775	0.124722	0.345187	0	0	0	0	0	-475.223	-8.89246	6.38063e-06	9.02044e-05
SYT13	55.7028	12.5254	15.2574	0	0	0	0	0	0	0	-622.476	-9.28188	6.40768e-06	9.05017e-05
ITPR1	61.8919	65.7584	73.2356	19.0824	19.1003	8.17615	7.71741	9.45043	8.93421	13.1741	-4.9088	-2.29537	6.44276e-06	9.09118e-05
FAT4	59.4163	51.6673	48.8237	71.4655	83.4201	392.115	155.854	323.52	169.088	270.8	4.08588	2.03065	6.46048e-06	9.10765e-05
SGCD	9.90271	23.4851	17.2917	0	0	0	0.282344	0	0.110299	0	-77.5694	-6.27742	6.53216e-06	9.20007e-05
ITPR3	497.611	428.995	501.46	228.864	297.781	97.4325	94.7735	114.665	87.467	73.1892	-4.15304	-2.05417	6.57578e-06	9.25285e-05
SETSIP	19.8054	12.5254	17.2917	0	0	0	0.0941147	0	0	0	-179.321	-7.4864	6.60588e-06	9.28651e-05
CFI	1.23784	0	0	26.8152	24.1631	0	0	0	0	0	-403.33	-8.65582	6.6348e-06	9.31103e-05
MTX3	2.47568	3.13135	4.06864	15.0913	11.8514	36.7927	59.8569	34.3365	63.7528	40.2541	5.30299	2.40681	6.6357e-06	9.31103e-05
GIT1	352.784	367.934	396.693	70.4677	79.623	59.6178	30.8696	57.6476	31.8764	63.6746	-5.18918	-2.37551	6.76333e-06	9.48127e-05
GPR4	0	0	0	32.1782	27.73	0	0	0	0	0	-459.223	-8.84305	6.81412e-06	9.54357e-05
TPK1	3.71352	1.56568	3.05148	16.0891	20.4811	1.02202	0.941147	1.57507	0.99269	0.731892	-9.43285	-3.23769	6.83506e-06	9.56399e-05
KIF26B	1.23784	0	0	1.7461	1.49581	12.6049	9.03501	14.4907	11.4711	9.5146	7.51781	2.91031	6.87949e-06	9.60829e-05
CA2	7.42703	12.5254	17.2917	0.249443	0.115062	0.340673	0	0	0	0	-98.4903	-6.62191	6.87518e-06	9.60829e-05
DNAJA4	23.5189	20.3538	22.3775	28.3118	28.4204	3.40673	6.68214	4.09518	6.39734	2.56162	-4.93061	-2.30177	6.91837e-06	9.65363e-05
C11orf24	3.71352	9.39405	6.10297	30.0579	28.5354	91.9817	81.1269	91.3541	74.2312	62.2108	4.7081	2.23515	6.96048e-06	9.68543e-05
IRX5	13.6162	9.39405	12.2059	0.124722	0.345187	0	0	0.315014	0	0	-95.1743	-6.5725	6.95583e-06	9.68543e-05
MPP1	144.827	186.315	222.758	27.4388	28.3053	23.1658	18.3524	24.5711	18.6405	29.6416	-5.29507	-2.40465	6.94914e-06	9.68543e-05
PIEZO2	0	0	1.01716	20.5791	30.0312	0	0	0	0	0	-399.043	-8.6404	7.01473e-06	9.7481e-05
FGF16	0	0	0	25.4432	32.6777	0	0	0	0	0	-445.825	-8.80033	7.01848e-06	9.7481e-05
ALDH3B1	12.3784	6.2627	13.2231	0.249443	0	80.3988	32.1872	68.9881	35.4059	101.001	10.4095	3.37983	7.08206e-06	9.82733e-05
PINK1	8.66487	7.82838	8.13729	33.4254	28.3053	141.039	36.0459	142.701	38.384	114.175	5.18013	2.37299	7.10318e-06	9.83095e-05
SH3GL3	17.3297	32.8792	14.2403	0.124722	0.230124	0	0	0	0	0	-475.958	-8.89469	7.10427e-06	9.83095e-05
ITM2A	1.23784	0	0	28.4365	21.5166	0	0	0	0	0	-395.654	-8.62809	7.10399e-06	9.83095e-05
CHRD	13.6162	7.82838	17.2917	0.124722	0.115062	0	0.188229	0	0	0	-92.8394	-6.53667	7.14988e-06	9.88497e-05
TTLL7	8.66487	4.69703	5.08581	6.23608	8.39954	38.496	30.8696	34.9666	33.7515	27.08	4.53792	2.18203	7.21782e-06	9.96974e-05
GARRE1	225.287	258.336	264.462	48.7662	53.1587	31.6826	44.1398	32.1314	41.5827	33.3011	-4.60386	-2.20284	7.26663e-06	0.00010028
ANK3	0	1.56568	0	18.3341	18.0648	0	0.470574	0.630028	0.330897	0.365946	-20.4713	-4.35553	7.29797e-06	0.00010062
STX11	7.42703	0	5.08581	13.0958	15.0731	0.681346	1.22349	0.315014	1.32359	1.09784	-9.0535	-3.17847	7.71732e-06	0.000106304
ANKRD29	14.8541	17.2224	8.13729	1.87082	2.07112	0	0	0	0	0	-306.681	-8.26059	7.75727e-06	0.000106756
NR6A1	34.6595	25.0508	24.4119	0.374165	0.230124	1.02202	0.188229	0.315014	0.110299	1.82973	-24.8671	-4.63617	7.76942e-06	0.000106826
HLA-F	11.1406	12.5254	17.2917	1.99555	1.38075	0	0	0	0	0	-313.678	-8.29314	7.84206e-06	0.000107726
F10	0	0	0	0.124722	0	6.13211	6.3998	5.67026	7.94152	1.82973	75.5372	6.23912	7.88771e-06	0.000108255
TAF1L	14.8541	29.7478	30.5148	0	0	0	0	0	0	0	-558.642	-9.12578	7.91422e-06	0.000108519
MTHFD2	29.7081	20.3538	28.4805	58.8686	60.2926	154.665	202.911	159.397	199.31	103.929	3.94222	1.97901	7.98544e-06	0.000109396
ERFE	0	0	0	0.124722	0.345187	9.53884	2.72933	7.56034	4.08106	3.29351	23.4199	4.54966	8.12537e-06	0.000111212
ART4	0	0	0	25.5679	27.9601	0	0	0	0	0	-411.4	-8.6844	8.17278e-06	0.000111759
PON3	23.5189	20.3538	29.4977	0	0	0	0	0	0	0	-545.929	-9.09257	8.22368e-06	0.000112267
SLC16A12	0	0	0	0	0	17.0336	31.5284	13.2306	33.2	9.88054	839.123	9.71274	8.22482e-06	0.000112267
ARHGAP20	2.47568	3.13135	1.01716	3.74165	4.14224	0	0	0	0	0.365946	-60.2787	-5.91358	8.25743e-06	0.00011261
PNP	55.7028	48.5359	57.9782	224.125	235.302	20.4404	36.2342	23.9411	33.9721	17.1995	-4.74504	-2.24642	8.2766e-06	0.000112769
CSNK1A1L	32.1838	15.6568	25.429	0	0	0	0	0	0	0	-545.358	-9.09106	8.44014e-06	0.000114893
ADGRL3	64.3676	32.8792	11.1888	0.124722	0	1.70336	0.0941147	0.945043	0.110299	0	-37.718	-5.23718	8.4833e-06	0.000115376
HOXB7	54.4649	45.4046	68.1498	50.8864	49.7069	14.9896	13.7407	13.5456	12.5741	13.906	-3.80653	-1.92847	8.61304e-06	0.000117035
TCF4	248.806	237.983	224.793	223.127	224.947	68.1346	64.2803	63.0028	61.7674	59.6492	-3.58928	-1.84369	8.76727e-06	0.000119023
RCHY1	74.2703	93.9405	84.4244	28.686	26.0041	7.83548	17.5994	8.50538	18.089	10.9784	-4.69212	-2.23024	8.80416e-06	0.000119308
RAB11A	274.8	369.499	299.045	312.927	301.923	55.5297	108.42	62.0578	111.843	69.1638	-3.7893	-1.92193	8.79709e-06	0.000119308
SYT15	0	0	0	0.997773	0	8.51682	8.9409	4.09518	11.1402	2.19568	17.5913	4.13679	8.86612e-06	0.00012004
SLC7A7	13.6162	12.5254	11.1888	9.10468	8.05435	3.40673	0.564688	1.89009	0.441196	2.19568	-7.23002	-2.854	8.896e-06	0.000120336
SNX10	11.1406	10.9597	15.2574	0.124722	0.115062	0	0	0	0.110299	0	-125.546	-6.97207	8.91419e-06	0.000120474
TBL1Y	27.2325	15.6568	28.4805	0	0	0	0	0	0	0	-531.168	-9.05303	8.95779e-06	0.000120954
IGSF9B	17.3297	15.6568	9.15445	0.249443	0	0.340673	0	0.315014	0	0	-62.7977	-5.97264	8.98507e-06	0.000121214
KIT	2.47568	4.69703	3.05148	6.85969	7.93929	0	0	0	0	0	-257.309	-8.00736	9.04396e-06	0.000121899
SNCA	0	0	0	174.111	169.026	1.70336	4.23516	1.89009	4.85315	3.65946	-20.8386	-4.38119	9.13667e-06	0.000123038
ALOX5AP	51.9892	32.8792	32.5492	0	0.345187	1.02202	1.50584	0.945043	0.882391	1.09784	-20.7467	-4.37481	9.18729e-06	0.000123609
GADD45G	11.1406	12.5254	25.429	0.623608	0.575311	0	0	0	0	0	-366.43	-8.51739	9.22736e-06	0.000123927
JUP	32.1838	61.0613	91.5445	86.5568	89.2883	16.0116	1.22349	18.5858	0.99269	13.54	-7.26427	-2.86082	9.2193e-06	0.000123927
ZNF736	0	0	0	1.7461	1.26568	9.53884	12.7996	6.6153	11.3608	9.5146	8.04716	3.00848	9.3341e-06	0.000125025
PKD1	59.4163	61.0613	63.064	47.1448	58.5667	294.682	144.278	270.597	142.065	265.677	3.88955	1.9596	9.31832e-06	0.000125025
SLC37A1	0	0	0	14.0935	13.5773	0	0	0	0.110299	0	-102.174	-6.67489	9.32828e-06	0.000125025
LITAF	13.6162	10.9597	10.1716	0.249443	0.690373	51.7823	58.5393	48.5122	63.5322	39.8881	8.02026	3.00365	9.3612e-06	0.000125277
F8A2	0	0	0	0.249443	0.460249	4.42875	5.27042	9.13541	4.85315	3.29351	16.0563	4.00507	9.71692e-06	0.000129922
A1BG	0	0	0	0.498887	1.03556	8.17615	7.24683	5.67026	6.83853	6.58703	9.93857	3.31304	9.7264e-06	0.000129933
CFD	0	0	0	0.249443	0	9.19817	1.69406	11.0255	3.86046	2.92757	44.7865	5.48499	9.7866e-06	0.000130621
LRRC70	0	0	0	13.5947	12.3117	0	0.188229	0	0.220598	0	-41.452	-5.37337	9.82272e-06	0.000130987
CNOT6L	136.162	140.911	125.111	68.4722	63.3993	22.4844	31.4343	27.4062	29.0086	30.0076	-3.68832	-1.88296	1.00068e-05	0.000133289
RPS6KA3	242.616	411.773	399.744	207.412	220.344	56.8924	96.3735	64.2629	95.188	66.6022	-3.8609	-1.94894	1.00131e-05	0.000133289
BDNF	28.4703	18.7881	25.429	23.4477	17.4895	48.3756	212.699	59.2227	206.038	30.7395	4.93107	2.3019	1.00375e-05	0.000133379
CTIF	19.8054	4.69703	8.13729	36.7929	37.1651	149.896	69.0802	127.581	76.5474	108.686	4.69754	2.2319	1.00365e-05	0.000133379
COL5A2	69.319	32.8792	53.9095	425.55	486.138	1864.5	1364.95	1673.04	1472.82	1778.5	7.59959	2.92592	1.00505e-05	0.000133433
FMNL1	0	1.56568	0	1.12249	0.345187	10.9015	4.32928	6.93031	7.27973	7.68487	10.3285	3.36856	1.00787e-05	0.00013369
UST	14.8541	6.2627	4.06864	0.124722	0.230124	41.9028	39.6223	42.8419	45.3328	43.5476	9.2485	3.20922	1.01274e-05	0.000134218
ARFGEF3	0	0	0	37.7907	38.3157	0.340673	0.658803	1.57507	0.661793	0.365946	-20.8516	-4.38208	1.01572e-05	0.000134494
FRAS1	0	0	0	23.9466	21.5166	0.681346	0.188229	0.315014	0.220598	0.731892	-22.0965	-4.46575	1.02827e-05	0.000136035
MYSM1	21.0433	14.0911	23.3947	19.0824	19.9058	56.8924	87.2443	53.8674	89.4524	68.4319	3.65345	1.86926	1.03981e-05	0.000137441
PTN	0	0	0	0	0	12.2642	35.7636	7.24533	27.4644	16.4676	792.407	9.6301	1.0618e-05	0.000140102
ABCA6	0	0	0	31.5546	31.9873	1.36269	0	0.315014	0.220598	0.365946	-28.6056	-4.83822	1.06163e-05	0.000140102
VIL1	21.0433	25.0508	22.3775	0	0	0	0	0	0	0	-508.366	-8.98972	1.06702e-05	0.000140667
WDFY2	7.42703	7.82838	13.2231	15.3408	14.0376	38.8367	76.1388	38.7467	76.5474	36.9606	4.29599	2.10299	1.0724e-05	0.000141252
GULP1	47.0379	18.7881	20.3432	51.8842	50.5123	6.81346	7.99975	9.13541	9.26511	11.3443	-4.45402	-2.15511	1.07692e-05	0.000141723
STRBP	28.4703	43.8389	50.8581	12.098	12.6568	4.08807	4.61162	7.87535	5.29435	3.29351	-5.59417	-2.48392	1.09726e-05	0.000144274
GDF6	0	0	0	2.49443	3.22174	9.87951	24.1875	11.3405	30.3322	6.22108	9.10971	3.18741	1.13519e-05	0.000149131
GJA5	8.66487	12.5254	12.2059	1.87082	2.99162	0	0	0	0	0	-260.314	-8.02411	1.14251e-05	0.000149962
SEMA3G	6.18919	0	3.05148	4.11581	2.64643	0	0.0941147	0	0.110299	0.365946	-25.5538	-4.67547	1.16059e-05	0.000152202
CCDC14	2.47568	4.69703	2.03432	53.5056	67.3114	221.437	151.242	201.609	156.294	233.474	7.20717	2.84943	1.19086e-05	0.000156035
AP3B2	69.319	46.9703	39.6693	0	0	0.681346	0.0941147	2.52011	0.661793	1.46378	-28.5334	-4.83458	1.19543e-05	0.000156499
ITGBL1	0	0	0	10.2272	8.39954	10.9015	76.5153	13.5456	85.8125	20.127	9.88236	3.30486	1.20192e-05	0.000157211
SAMSN1	2.47568	0	0	8.48107	8.16942	0.340673	0	0	0	0	-60.4803	-5.91839	1.23288e-05	0.000161121
CMKLR2	0	0	0	0.124722	0	16.0116	1.41172	11.9705	0.441196	9.88054	105.236	6.71748	1.24464e-05	0.000162517
GSDMC	0	0	0	12.5969	12.4267	0	0.0941147	0	0	0	-96.9019	-6.59845	1.26845e-05	0.000165482
KCTD3	9.90271	10.9597	19.3261	30.4321	31.412	88.575	77.1741	99.8595	69.4883	91.4865	3.65592	1.87023	1.2894e-05	0.000168069
SLC16A11	11.1406	7.82838	11.1888	0.124722	0.460249	0.340673	0	0	0	0	-80.986	-6.3396	1.29143e-05	0.000168188
PDLIM2	1.23784	0	0	13.2205	12.0815	48.7162	33.0343	51.6623	31.5455	39.1562	6.59708	2.72183	1.29499e-05	0.000168505
COL9A2	0	0	0	0.124722	0	5.11009	4.61162	5.35524	4.74285	5.85514	63.6511	5.99211	1.29677e-05	0.000168591
ZNF793	0	0	0	0.374165	0.805435	4.76942	8.75267	4.72521	8.27242	3.29351	12.0513	3.59112	1.29795e-05	0.000168599
HIPK2	33.4217	25.0508	33.5663	148.169	161.547	360.773	465.585	389.988	472.851	333.377	4.94725	2.30663	1.30147e-05	0.00016891
HMGB1P1	12.3784	18.7881	17.2917	0.74833	0.805435	0.681346	0.376459	0.945043	0	0.731892	-18.1853	-4.1847	1.31026e-05	0.000169904
KCNK1	0	0	0	0.124722	0.115062	3.40673	4.14105	3.46516	5.07375	3.65946	32.8252	5.03673	1.31652e-05	0.000170468
CMIP	121.308	134.648	172.917	116.615	130.25	37.474	50.2572	39.3768	51.3993	23.0546	-3.28603	-1.71635	1.31687e-05	0.000170468
GPR143	0	0	0	23.6971	23.2426	0	0	0	0	0	-362.058	-8.50008	1.32088e-05	0.000170839
CTDSP2	51.9892	53.233	51.8752	87.5546	93.6606	357.366	134.678	357.226	147.69	405.102	4.07595	2.02714	1.32747e-05	0.000171544
PIM1	3.71352	9.39405	5.08581	1.12249	1.38075	34.7486	8.75267	39.3768	10.2578	32.5692	7.39898	2.88733	1.35451e-05	0.000174889
HYAL2	66.8433	57.93	70.1841	233.728	287.54	38.496	31.7167	38.4317	29.891	37.6924	-4.11383	-2.04048	1.36652e-05	0.000176289
SYDE1	22.2811	29.7478	15.2574	15.3408	17.7196	70.5193	64.2803	75.9184	62.4292	60.3811	3.80071	1.92627	1.3718e-05	0.000176817
ARHGAP31	168.346	142.476	143.42	115.866	125.648	42.5841	52.8925	39.3768	48.4212	28.9097	-3.16904	-1.66405	1.37307e-05	0.00017683
MBNL2	350.308	231.72	200.381	142.557	159.016	53.145	55.6218	48.5122	63.6425	51.2324	-3.92369	-1.97221	1.40712e-05	0.00018106
IKZF2	3.71352	4.69703	7.12013	0.249443	0.460249	14.6489	36.4224	14.1756	39.1561	13.906	8.88917	3.15205	1.41208e-05	0.000181543
STIM2	210.433	222.326	179.02	39.5368	37.3952	34.0673	28.8932	24.5711	30.994	31.1054	-4.55747	-2.18823	1.41618e-05	0.000181915
VCPIP1	142.351	195.709	201.398	34.7973	31.412	26.5725	23.3404	28.0363	25.2584	22.6887	-4.76119	-2.25132	1.41876e-05	0.00018209
STK33	0	0	0	0.374165	0.690373	4.42875	6.68214	6.6153	4.19136	6.58703	11.539	3.52844	1.4293e-05	0.000183287
RHOT2	17.3297	9.39405	13.2231	25.1938	28.8806	91.9817	53.2689	85.3688	59.0099	104.295	3.79758	1.92508	1.4339e-05	0.000183719
gene:ENSG00000262633	42.0865	76.7181	72.2184	0	0	3.06606	1.88229	0	0	0	-37.517	-5.22947	1.43981e-05	0.000184321
DNAJA2	454.287	480.662	481.117	97.7818	89.8636	51.7823	83.9503	55.1275	83.6066	64.4065	-4.70758	-2.23499	1.4455e-05	0.000184891
NLK	80.4595	65.7584	87.4759	39.0379	35.094	8.17615	20.1405	6.93031	20.5156	12.0762	-4.36283	-2.12527	1.45437e-05	0.000185867
ZBTB20	128.735	89.2435	95.6131	15.7149	15.4183	16.693	6.49391	15.4357	8.16212	15.7357	-5.47709	-2.45341	1.46506e-05	0.000187074
UBE2L5	16.0919	4.69703	17.2917	0.124722	0	0	0.0941147	0	0	0	-135.901	-7.08641	1.47431e-05	0.000188097
CLCN4	53.2271	20.3538	33.5663	14.9666	14.728	6.13211	3.95282	6.6153	4.19136	5.48919	-5.04708	-2.33545	1.47585e-05	0.000188134
TSPAN15	3.71352	4.69703	0	12.4722	9.32004	0	0	0	0	0	-244.207	-7.93196	1.4882e-05	0.000189432
SNTA1	3.71352	4.69703	4.06864	1.87082	2.99162	23.1658	10.4467	26.4612	6.94883	28.9097	6.16148	2.62328	1.48856e-05	0.000189432
TEX2	493.898	194.144	182.072	61.9867	62.824	32.3639	52.7042	38.7467	49.4139	23.7865	-5.01176	-2.32532	1.49572e-05	0.000190182
GPC1	0	0	0	53.0067	58.5667	353.278	147.007	352.186	155.191	300.076	11.5411	3.52871	1.50983e-05	0.000191815
TNFSF15	0	0	0	23.3229	21.8618	0	0	0	0	0	-348.925	-8.44677	1.51182e-05	0.000191905
LY75	0	0	0	25.1938	20.1359	0	0	0	0	0	-349.996	-8.4512	1.5155e-05	0.00019221
PTGER4	53.2271	17.2224	17.2917	72.7127	69.9578	7.4948	14.2113	9.13541	11.9123	5.85514	-4.77438	-2.25531	1.53714e-05	0.00019479
NID2	0	0	0	69.9688	62.3637	334.2	277.168	311.864	296.594	302.271	11.3553	3.50529	1.54173e-05	0.000195208
CPT1A	47.0379	40.7076	31.532	244.829	249.455	27.5945	17.223	31.5014	14.8904	27.446	-5.22879	-2.38648	1.54379e-05	0.000195305
FOXA1	0	0	0	10.8508	13.5773	0.340673	0	0	0	0.365946	-37.7503	-5.23842	1.548e-05	0.000195672
KBTBD11	0	0	0	0.623608	0.345187	5.45077	9.31736	4.4102	8.27242	1.46378	14.4745	3.85544	1.56094e-05	0.000197143
DAB2IP	183.2	151.871	175.969	52.7573	62.2486	36.1113	22.7758	41.8969	22.3907	34.7649	-3.93396	-1.97598	1.56449e-05	0.000197425
CDKL2	7.42703	14.0911	10.1716	0.997773	0.575311	0	0.282344	0.315014	0.330897	0.365946	-20.5406	-4.3604	1.56978e-05	0.000197926
XIRP2	0	0	0	13.2205	8.62966	0	0.0941147	0	0.110299	0	-56.2975	-5.815	1.59551e-05	0.000201002
ZC3H11B	14.8541	31.3135	15.2574	0	0	0	0	0	0	0	-454.502	-8.82814	1.60174e-05	0.000201618
CEACAM1	2.47568	0	2.03432	3.61693	3.56693	0	0.188229	0	0	0	-34.7226	-5.1178	1.62245e-05	0.000204054
RASSF9	3.71352	6.2627	8.13729	3.49221	3.10668	0.340673	0.0941147	0.630028	0.330897	0	-13.5632	-3.76162	1.62817e-05	0.000204602
KIRREL1	82.9352	89.2435	63.064	75.0824	83.4201	274.242	274.909	247.916	280.049	245.55	3.38058	1.75727	1.63555e-05	0.000205359
KIAA1614	0	0	0	1.87082	2.76149	18.0557	7.43506	17.6408	6.39734	19.7611	8.2972	3.05262	1.64253e-05	0.000206063
ACSS3	0	0	0	0.124722	0	7.83548	1.41172	5.98527	2.75747	11.7103	75.998	6.24789	1.6509e-05	0.000206941
ASIC1	2.47568	4.69703	3.05148	0.623608	0.920498	13.9676	8.84678	7.24533	10.699	6.22108	7.78427	2.96056	1.66585e-05	0.00020864
FMR1	172.06	216.063	203.432	43.5279	38.3157	28.9572	36.6106	21.421	37.281	23.4205	-4.50156	-2.17042	1.67224e-05	0.000209267
VGF	1.23784	0	0	0.374165	0	4.42875	7.81152	5.04023	4.96345	1.46378	20.4621	4.35488	1.68817e-05	0.000211084
ANAPC4	194.341	201.972	195.295	28.1871	30.7216	23.5064	26.8227	26.7762	26.9129	29.2757	-4.83567	-2.27372	1.69306e-05	0.00021152
SLC35F1	27.2325	12.5254	13.2231	0	0.230124	0	0	0	0	0	-392.079	-8.615	1.72444e-05	0.000215262
SPTBN1	2179.83	2256.14	2418.81	878.415	968.478	317.166	381.353	336.12	361.67	308.858	-5.09468	-2.34899	1.72887e-05	0.000215635
ADAM33	0	0	0	0	0	25.5505	13.0819	19.2159	13.8977	13.1741	660.454	9.36731	1.74027e-05	0.000216877
ZNF706	217.86	133.082	141.385	62.735	63.9746	24.1878	36.7047	31.8164	36.8398	29.6416	-3.81721	-1.93252	1.7496e-05	0.000217859
PCDHGA7	2.47568	0	1.01716	2.61915	1.95606	24.8691	10.1644	13.5456	9.596	14.2719	6.90419	2.78747	1.75433e-05	0.000218268
TLCD3B	2.47568	21.9195	14.2403	0	0.115062	0	0	0	0.110299	0.365946	-68.7362	-6.103	1.78979e-05	0.000222496
MYZAP	0	0	0	18.5835	17.0292	0.681346	0	0.315014	0	0.365946	-27.8728	-4.80078	1.80525e-05	0.000224233
ACAP3	29.7081	21.9195	17.2917	18.833	20.1359	104.587	48.8455	92.9292	45.8843	84.5335	3.55376	1.82934	1.84272e-05	0.000228698
MEF2A	326.789	447.783	400.761	88.6771	92.8552	45.6502	73.9742	45.047	76.4371	64.0406	-4.41715	-2.14312	1.89828e-05	0.0002354
UVRAG	54.4649	51.6673	47.8066	97.7818	93.0853	16.693	20.1405	20.7909	18.3096	23.7865	-3.62261	-1.85703	1.91543e-05	0.000237331
TMEM119	0	0	0	0	0	35.7707	2.07052	22.051	3.97076	36.5946	792.403	9.63009	1.92985e-05	0.000238921
RNF19B	43.3244	62.627	49.8409	40.5345	41.3073	12.2642	10.4467	13.5456	10.2578	13.54	-3.77309	-1.91575	1.93878e-05	0.000239829
APOBEC3B	0	0	0	2.36971	1.03556	14.3083	4.89396	17.3258	4.52226	16.4676	9.50454	3.24862	1.94395e-05	0.00024027
PROS1	29.7081	34.4449	42.7208	50.3875	44.9893	10.5609	11.1055	13.2306	13.8977	11.3443	-3.66442	-1.87359	1.97432e-05	0.000243824
PRKACG	23.5189	14.0911	18.3089	0	0	0	0	0	0	0	-414.373	-8.69479	2.01249e-05	0.000248334
PCDHGB7	1.23784	4.69703	4.06864	6.98441	9.89535	44.2875	22.8699	27.4062	23.7143	41.3519	4.76933	2.25379	2.01905e-05	0.000248911
RUNX1T1	0	0	0	11.4744	10.9309	0	0.0941147	0	0	0	-87.2067	-6.44637	2.02048e-05	0.000248911
SEC24D	23.5189	51.6673	46.7894	135.697	128.409	321.595	328.837	344.626	333.434	335.207	4.21491	2.0755	2.03061e-05	0.000249749
KSR2	0	0	0	11.2249	10.7008	0.340673	0	0	0	0	-61.2163	-5.93584	2.02991e-05	0.000249749
WWP1	155.968	186.315	169.866	102.022	93.3154	36.452	57.0335	34.6516	53.9362	29.6416	-3.2574	-1.70372	2.03484e-05	0.000250066
TNK2	435.719	263.033	287.857	23.8218	25.6589	44.2875	18.9171	42.5269	18.089	43.1816	-6.19341	-2.63073	2.04369e-05	0.000250949
ZNF660	0	0	0	0.249443	0.690373	4.08807	6.77626	3.15014	7.39003	4.39135	12.7956	3.67758	2.05024e-05	0.000251548
ID3	1.23784	3.13135	4.06864	42.4054	42.8031	73.926	196.7	83.4788	213.318	78.6784	6.64187	2.73159	2.05554e-05	0.000251992
KCND1	1.23784	0	2.03432	0.623608	0.460249	12.6049	2.82344	11.6555	2.86777	10.9784	10.853	3.44002	2.06314e-05	0.000252718
SVIP	0	0	0	90.4232	88.7129	2.38471	2.82344	2.2051	2.53687	0.731892	-16.6231	-4.05512	2.07196e-05	0.000253592
MAPK3	553.314	433.692	436.362	69.8441	66.621	70.5193	48.8455	64.2629	45.8843	82.3379	-4.98972	-2.31896	2.10012e-05	0.000256829
CYTH1	68.0811	65.7584	68.1498	50.5123	50.8575	17.0336	15.5289	22.051	13.7874	16.8335	-3.4478	-1.78568	2.10465e-05	0.000257174
WNT16	0	0	0	0.124722	0	8.17615	2.16464	7.24533	2.42658	6.95298	67.8707	6.08472	2.12332e-05	0.000259069
ATP6V0A1	107.692	59.4957	79.3386	38.539	40.5019	18.3963	12.9878	18.5858	13.8977	17.1995	-3.93845	-1.97763	2.1236e-05	0.000259069
ATOH8	0	0	0	4.36526	3.68199	15.3303	23.811	16.6958	24.8173	14.2719	6.25682	2.64543	2.17283e-05	0.00026486
ZNF239	1.23784	0	0	1.12249	0.690373	4.76942	11.0114	5.04023	11.9123	3.65946	9.23465	3.20706	2.18303e-05	0.000265888
CHUK	195.579	197.275	188.175	56.1247	53.2738	25.5505	46.4927	28.3513	48.5315	29.2757	-3.81601	-1.93206	2.2129e-05	0.000269308
APOLD1	106.454	46.9703	65.0983	34.4232	40.8471	22.4844	4.42339	14.4907	6.83853	14.6378	-4.69957	-2.23253	2.25052e-05	0.000273665
SHROOM3	1.23784	1.56568	0	9.35412	10.2405	30.3199	40.9399	32.7615	37.3913	20.493	5.69839	2.51055	2.25314e-05	0.000273761
CYRIB	132.449	142.476	170.883	57.1225	59.0269	21.8031	40.8458	18.9009	39.3767	23.0546	-3.81947	-1.93337	2.2568e-05	0.000273985
RUSF1	6.18919	6.2627	7.12013	28.0624	29.4559	77.3327	59.7628	73.7133	66.069	91.8525	4.30278	2.10527	2.26245e-05	0.00027445
MS4A6A	23.5189	10.9597	9.15445	0.374165	0.230124	0	0	0	0	0	-321.203	-8.32734	2.33048e-05	0.000282474
GMPR	3.71352	3.13135	2.03432	26.441	23.0124	0.681346	0	1.26006	0	2.56162	-14.1442	-3.82214	2.33573e-05	0.000282882
CDKN1A	21.0433	14.0911	13.2231	240.214	224.486	814.549	366.483	939.372	386.598	1685.91	8.11557	3.02069	2.36754e-05	0.000286505
ATP2A1	25.9946	25.0508	28.4805	0.74833	0.920498	1.36269	1.12938	0.945043	0.772092	2.19568	-12.3287	-3.62395	2.37024e-05	0.0002866
ENPP5	17.3297	20.3538	16.2746	0	0	0	0	0	0	0	-398.871	-8.63978	2.39208e-05	0.000288777
ANKRD10	11.1406	14.0911	11.1888	14.5924	11.046	99.1358	18.6347	81.9037	18.9714	73.5552	4.6752	2.22503	2.39161e-05	0.000288777
ATP6V0A4	0	1.56568	0	8.23163	8.28448	0	0.188229	0	0	0.365946	-30.7611	-4.94303	2.41846e-05	0.000291622
ZNF135	0	0	0	0.374165	0.115062	4.08807	3.57636	4.72521	4.30166	5.48919	17.9388	4.16501	2.41952e-05	0.000291622
ASMTL	0	0	0	10.3519	7.82423	43.6061	18.9171	33.7065	18.3096	45.3773	7.28625	2.86518	2.42699e-05	0.000292288
TUBB8	12.3784	14.0911	23.3947	0.124722	0	0	0	0	0	0	-368.8	-8.5267	2.45801e-05	0.000295551
PLCE1	0	0	0	1.87082	2.07112	18.737	10.3526	13.2306	9.37541	6.22108	7.28818	2.86556	2.45726e-05	0.000295551
CXCR4	0	0	0	17.8352	19.3304	0	0	0	0	0	-289.011	-8.17498	2.47482e-05	0.000297334
COPZ2	16.0919	7.82838	8.13729	8.23163	6.55854	33.3859	31.999	30.8714	35.8471	29.6416	4.20739	2.07293	2.52604e-05	0.000303245
GOLGA8A	0	0	0	72.9622	69.9578	384.279	307.661	278.788	325.382	263.481	10.7865	3.43116	2.54387e-05	0.000305142
COL11A2	25.9946	20.3538	17.2917	1.87082	0.920498	1.02202	0.658803	0.945043	1.54418	1.46378	-11.0662	-3.46809	2.55545e-05	0.000306288
SVOP	24.7568	6.2627	4.06864	0	0.115062	0	0.0941147	0	0	0	-124.681	-6.9621	2.61116e-05	0.000312716
PLA2R1	0	0	0	127.466	132.782	2.72538	3.01167	3.46516	4.52226	2.56162	-15.9114	-3.99199	2.6188e-05	0.00031338
NUAK2	1.23784	0	0	2.36971	1.841	10.2202	19.9523	9.13541	18.089	4.7573	7.74766	2.95376	2.64905e-05	0.000316497
SESN3	14.8541	9.39405	11.1888	3.36748	5.1778	1.36269	0.564688	1.89009	0.441196	1.46378	-7.71373	-2.94743	2.64698e-05	0.000316497
gene:ENSG00000284989	4.95136	7.82838	22.3775	0.873052	0.920498	0	0	0	0	0	-266.191	-8.05632	2.6794e-05	0.00031987
DKK2	16.0919	7.82838	2.03432	0.498887	0.690373	0	0.0941147	0	0.330897	0	-34.9507	-5.12725	2.68893e-05	0.000320752
SARM1	0	0	0	2.36971	1.61087	12.9456	10.3526	15.4357	7.50033	12.4422	6.89703	2.78598	2.7042e-05	0.000322318
ST8SIA4	0	0	0	16.4633	19.3304	0	0	0	0	0	-278.775	-8.12296	2.80659e-05	0.000334258
BHLHE41	2.47568	3.13135	1.01716	2.49443	2.53137	13.9676	16.1877	11.9705	17.7581	9.14865	5.86497	2.55212	2.81087e-05	0.000334502
PAIP2B	16.0919	25.0508	24.4119	1.99555	0.920498	1.36269	1.03526	1.26006	0.551495	1.82973	-10.9856	-3.45754	2.83185e-05	0.000336467
INHBE	0	0	0	0	0.115062	13.6269	0.752918	14.4907	0.772092	5.12324	93.9499	6.55382	2.83089e-05	0.000336467
MARVELD1	13.6162	18.7881	19.3261	61.1136	63.8595	163.523	108.514	157.507	111.622	157.357	3.76861	1.91403	2.84379e-05	0.000337618
ACAP1	8.66487	14.0911	20.3432	0.124722	0.115062	0.340673	0.282344	0.315014	0.330897	0.365946	-23.9137	-4.57976	2.87131e-05	0.000340617
EDN1	7.42703	0	1.01716	659.029	607.758	0.681346	28.8932	1.57507	22.8319	1.46378	-22.8829	-4.5162	2.889e-05	0.000342446
AKR1A1	507.514	446.217	496.375	45.3987	50.5123	64.0465	50.4455	65.838	50.2963	60.747	-5.29209	-2.40384	2.9588e-05	0.000350167
GLT8D2	0	0	0	3.61693	3.68199	11.2422	20.3288	10.7105	26.2511	16.8335	6.71884	2.74821	2.95684e-05	0.000350167
CLTCL1	1.23784	0	0	4.24054	3.22174	25.2098	13.3643	23.9411	13.0153	14.2719	6.18091	2.62782	2.9795e-05	0.00035234
SSTR1	0	0	0	0.249443	0.690373	3.7474	9.03501	3.46516	9.37541	1.46378	14.077	3.81527	2.98286e-05	0.00035246
NDUFA4L2	0	0	0	0	0.115062	7.15413	2.5411	6.93031	2.75747	4.7573	60.0969	5.90922	2.98921e-05	0.000352933
MTCL1	0	3.13135	5.08581	27.0646	29.1107	99.1358	53.4571	91.3541	48.7521	89.2908	5.56349	2.47599	2.99965e-05	0.000353612
SEPTIN6	25.9946	17.2224	34.5835	52.0089	56.6106	12.9456	4.89396	11.6555	5.40465	10.2465	-4.40457	-2.139	2.99966e-05	0.000353612
CHSY3	0	0	0	5.23831	4.71755	12.2642	30.7755	16.0657	29.1189	15.0038	6.83352	2.77263	3.02421e-05	0.000356227
STAT2	9.90271	20.3538	16.2746	51.7595	51.0876	204.744	53.1748	156.247	49.9654	225.423	4.48228	2.16423	3.02709e-05	0.000356287
STEAP3	0	0	1.01716	36.4187	40.1567	141.379	93.0794	140.496	94.6365	155.893	7.81067	2.96545	3.03604e-05	0.000356845
CACNA1C	0	0	0	0.124722	0.115062	5.11009	2.63521	2.83513	4.52226	4.02541	28.8583	4.85091	3.03658e-05	0.000356845
POTEI	16.0919	12.5254	21.3604	0	0	0	0	0	0	0	-369.937	-8.53114	3.04912e-05	0.00035804
PNPLA3	0	0	0	0.249443	0.115062	5.45077	3.67047	4.09518	3.52956	2.56162	20.7556	4.37543	3.05555e-05	0.000358515
DLG3	1.23784	3.13135	4.06864	2.74388	3.56693	23.1658	11.5761	24.2561	10.8093	17.1995	5.48176	2.45464	3.06135e-05	0.000358915
ITPR2	79.2217	57.93	60.0125	153.033	174.319	20.4404	38.7753	17.9558	40.9209	20.493	-3.80431	-1.92764	3.07414e-05	0.000360134
GPT2	4.95136	6.2627	8.13729	11.5991	12.7719	47.6942	39.4341	53.5524	47.3182	32.5692	4.07852	2.02804	3.08355e-05	0.000360955
TTYH1	14.8541	9.39405	6.10297	0.249443	0.115062	0.340673	0.0941147	0	0	0.365946	-36.787	-5.20112	3.10575e-05	0.000363271
TAF7L	0	7.82838	5.08581	2.99332	3.10668	0	0	0	0	0.731892	-33.1717	-5.05188	3.1434e-05	0.000367389
PPP2R5A	146.065	187.881	202.415	48.392	41.9977	26.2318	32.6578	24.2561	30.6631	39.1562	-4.04874	-2.01747	3.15215e-05	0.000368127
ATAD3A	14.8541	14.0911	9.15445	37.9154	35.7843	89.2563	91.103	86.6289	94.3056	67.7	3.51318	1.81278	3.18619e-05	0.000371813
NDUFA12	178.249	195.709	197.329	68.2227	61.2131	37.8147	46.6809	37.1717	43.899	35.1308	-3.43457	-1.78013	3.18979e-05	0.000371876
TBX1	0	0	0	12.2227	8.39954	0.340673	0.188229	0	0	0	-34.1353	-5.09319	3.19168e-05	0.000371876
RAB3D	0	4.69703	4.06864	40.784	40.0416	1.02202	1.12938	3.78017	1.54418	2.56162	-9.2559	-3.21037	3.24345e-05	0.000377615
TMEM214	55.7028	32.8792	65.0983	49.3898	49.7069	188.051	135.902	180.188	131.697	193.585	3.24618	1.69874	3.33786e-05	0.000388307
KLHL21	11.1406	3.13135	6.10297	31.4299	32.3325	108.334	48.375	108.68	43.899	106.49	4.62759	2.21026	3.36663e-05	0.000391351
ARHGEF3	2.47568	0	2.03432	50.3875	48.096	2.04404	0.564688	4.4102	0.441196	1.09784	-12.4081	-3.63321	3.40741e-05	0.000395323
RPEL1	8.66487	7.82838	17.2917	0	0	0	0.0941147	0	0	0	-120.866	-6.91727	3.40592e-05	0.000395323
SLC46A1	0	0	0	2.61915	2.07112	13.9676	10.7291	17.9558	13.5668	12.0762	6.63016	2.72904	3.40868e-05	0.000395323
gene:ENSG00000258864	13.6162	15.6568	9.15445	0	0	0	0.376459	0	0	0	-60.1509	-5.91051	3.42548e-05	0.000396965
CUBN	3.71352	3.13135	4.06864	4.86414	10.3556	0.340673	0.376459	0.945043	0.661793	1.82973	-8.16624	-3.02967	3.43284e-05	0.000397512
GDA	12.3784	17.2224	19.3261	0	0	0	0	0	0	0	-361.405	-8.49747	3.50837e-05	0.000405945
KLHDC8A	19.8054	20.3538	9.15445	0	0	0	0	0	0	0	-363.447	-8.5056	3.51263e-05	0.000406126
P3R3URF-PIK3R3	51.9892	34.4449	42.7208	0	1.841	2.72538	0.847032	0	2.86777	0	-19.5472	-4.28889	3.5418e-05	0.000409184
SIM1	0	0	0	10.4766	8.62966	0	0.0941147	0	0	0	-75.0673	-6.23011	3.56333e-05	0.000411356
SPTBN5	1.23784	0	0	80.196	75.1356	3.06606	2.72933	3.15014	2.09568	0.365946	-13.6888	-3.77493	3.58467e-05	0.000413502
PDE4A	1.23784	0	1.01716	8.23163	7.82423	33.7266	18.4465	38.7467	19.6332	31.8373	5.66651	2.50246	3.59458e-05	0.000414327
FGF1	0	0	0	0.374165	0.345187	2.04404	10.3526	2.52011	11.1402	1.09784	18.604	4.21754	3.59993e-05	0.000414626
ZNF560	0	1.56568	0	0	0.115062	4.76942	4.61162	3.15014	2.86777	2.56162	28.3854	4.82708	3.672e-05	0.000422603
C19orf33	0	0	0	10.2272	7.93929	0	0.0941147	0.315014	0	0	-38.9228	-5.28254	3.69494e-05	0.000424918
TOMM40L	60.6541	70.4554	69.167	25.9421	28.0752	11.5829	12.6114	12.9156	12.905	11.7103	-3.91953	-1.97068	3.71027e-05	0.000426355
IFIT5	0	0	0	10.3519	7.47904	23.1658	39.9987	28.0363	39.0458	19.7611	6.81648	2.76903	3.72792e-05	0.000428043
MAP3K11	190.627	183.184	188.175	94.1649	105.282	50.7603	34.1636	53.2374	31.4352	59.6492	-3.30118	-1.72298	3.73065e-05	0.000428043
GNG5P2	21.0433	15.6568	11.1888	0	0	0	0	0	0	0	-353.2	-8.46434	3.73962e-05	0.000428745
CDA	28.4703	40.7076	44.7551	0.124722	0.115062	0.681346	1.41172	1.89009	1.87508	0.731892	-16.5895	-4.0522	3.80996e-05	0.000436145
COLGALT2	0	0	0	0	0.115062	4.42875	7.43506	2.52011	6.72823	1.09784	60.9606	5.92981	3.80816e-05	0.000436145
BET1L	2.47568	3.13135	5.08581	37.6659	37.6253	101.521	62.2098	103.325	66.069	126.983	5.06235	2.33981	3.81631e-05	0.00043654
ABCF2-H2BE1	263.66	247.377	232.93	50.0134	54.4244	28.6165	56.2806	33.3915	54.1568	27.8119	-4.19223	-2.06772	3.82078e-05	0.000436718
BDKRB2	0	0	0	0	0	22.8251	7.71741	13.5456	9.596	11.7103	508.055	8.98884	3.84265e-05	0.000438884
UGT1A1	9.90271	7.82838	14.2403	0	0	0	0.0941147	0	0	0	-113.84	-6.83087	3.84582e-05	0.000438914
FAM114A1	14.8541	26.6165	21.3604	97.5323	97.9179	248.01	227.569	231.535	231.628	253.235	4.48775	2.16599	3.86256e-05	0.00044049
IGDCC4	0	0	0	0	0.345187	10.2202	1.22349	6.93031	2.09568	4.02541	28.3475	4.82515	3.89716e-05	0.000444099
KANSL2	177.011	133.082	119.008	16.9621	14.728	16.693	18.5406	17.6408	18.6405	21.2249	-4.91465	-2.29709	3.92458e-05	0.000446885
SVIL	70.5568	81.4151	92.5617	184.214	205.041	31.3419	31.6225	55.7575	29.5601	32.2033	-3.57367	-1.8374	3.99536e-05	0.000454601
MYRIP	0	0	0	9.72829	8.05435	0.340673	0.0941147	0	0	0	-37.6848	-5.23591	4.00507e-05	0.000455361
MARCHF5	204.243	203.538	201.398	59.3675	54.4244	35.7707	50.069	32.1314	45.5534	38.4243	-3.5314	-1.82024	4.04691e-05	0.000459771
CAMK1	51.9892	70.4554	75.2699	15.5902	18.1798	11.9236	9.5997	10.3955	9.04451	9.5146	-4.4501	-2.15384	4.09657e-05	0.000464898
ADA2	0	0	0	13.8441	14.6129	0	0.188229	0.315014	0.551495	0.365946	-19.0077	-4.24851	4.09822e-05	0.000464898
FARP1	32.1838	34.4449	25.429	56.4989	56.6106	150.577	120.843	152.782	118.24	151.136	3.13744	1.64959	4.11416e-05	0.000466354
gene:ENSG00000272822	24.7568	39.1419	25.429	0.873052	0.230124	1.70336	1.03526	0	1.32359	1.82973	-14.7805	-3.88562	4.20976e-05	0.000476831
COPS5	231.476	197.275	233.947	58.9933	59.6022	41.9028	47.3397	38.1167	45.002	37.6924	-3.67758	-1.87876	4.21472e-05	0.000477034
TJP2	138.638	140.911	149.523	300.579	285.239	54.5077	75.8564	44.102	60.7747	33.667	-3.79194	-1.92294	4.23603e-05	0.000479086
FBXO41	0	0	0	0.498887	1.15062	9.53884	4.61162	7.87535	4.74285	7.31892	8.89665	3.15326	4.3016e-05	0.000486136
HOXD10	11.1406	17.2224	17.2917	0	0	0	0	0	0	0	-336.563	-8.39473	4.30605e-05	0.000486273
ACTN3	13.6162	6.2627	8.13729	0.124722	0	0	0	0	0	0.365946	-70.8858	-6.14743	4.31051e-05	0.000486412
CCRL2	0	0	0	15.4655	15.0731	0	0	0	0	0	-239.64	-7.90473	4.32648e-05	0.000487848
THRB	9.90271	17.2224	12.2059	0	0.115062	0.340673	0	0.630028	0	0	-39.8009	-5.31473	4.3321e-05	0.000488116
ZBTB7C	12.3784	15.6568	17.2917	0	0	0	0	0	0	0	-334.229	-8.38469	4.35891e-05	0.000490769
PRKD1	8.66487	12.5254	5.08581	1.37194	1.03556	21.1217	30.399	23.3111	30.3322	24.1524	5.73652	2.52018	4.37926e-05	0.000492691
gene:ENSG00000285330	0	1.56568	1.01716	9.2294	12.5418	0	0	0	0	0	-200.224	-7.64547	4.39789e-05	0.000494048
ARHGAP32	0	0	0	8.48107	7.70917	35.7707	22.3052	29.9263	22.1701	30.3735	6.48618	2.69737	4.39551e-05	0.000494048
IP6K3	1.23784	3.13135	0	0	0	3.06606	5.17631	2.2051	5.62524	3.65946	21.97	4.45746	4.4118e-05	0.000495241
BCR	143.589	197.275	229.878	139.189	148.2	66.4312	28.9873	65.2079	31.2146	59.2833	-3.43054	-1.77844	4.4208e-05	0.000495881
HOXC9	0	0	0	10.2272	7.5941	0.340673	0	0	0	0	-51.3564	-5.68247	4.42837e-05	0.00049636
ACTA2	28.4703	20.3538	19.3261	23.4477	25.7739	84.8276	58.4452	82.2187	77.4298	79.7762	3.14458	1.65287	4.47189e-05	0.000500865
CHST6	0	0	0	0	0.345187	6.47279	3.29401	5.04023	4.08106	1.46378	22.4648	4.4896	4.49761e-05	0.000503371
RHPN1	0	0	1.01716	6.61025	6.67361	0	0.188229	0.315014	0	0	-26.2003	-4.71151	4.50224e-05	0.000503515
CACNA1A	2.47568	0	0	0.374165	0.115062	3.40673	4.51751	4.72521	4.52226	4.02541	12.9918	3.69953	4.53307e-05	0.000506586
H1-10	0	0	0	19.2071	18.7551	82.7835	29.7402	88.834	25.8099	81.24	7.63987	2.93355	4.53777e-05	0.000506734
IL17RC	12.3784	10.9597	4.06864	4.6147	4.71755	51.1009	15.5289	46.3071	12.2432	39.8881	4.90447	2.2941	4.56244e-05	0.000509112
ABRACL	58.1784	26.6165	52.8924	152.659	136.234	9.87951	33.3166	11.6555	32.6485	12.4422	-4.2755	-2.09609	4.60792e-05	0.000513805
GTF2IRD2B	0	1.56568	4.06864	9.10468	9.08991	39.8587	12.8937	48.8272	13.0153	47.207	5.80595	2.53753	4.6157e-05	0.000514292
GLI1	1.23784	0	1.01716	0.124722	0.345187	12.9456	0.752918	12.6006	0.772092	13.1741	18.1424	4.18129	4.63189e-05	0.000515713
EED	90.3622	89.2435	68.1498	30.5568	30.4915	10.5609	20.9876	12.2856	20.1847	12.0762	-3.89073	-1.96004	4.75194e-05	0.000528298
MAGEE1	29.7081	14.0911	11.1888	1.62138	1.61087	2.04404	0.941147	0.630028	0.99269	1.09784	-9.60923	-3.26442	4.74908e-05	0.000528298
HLCS	4.95136	3.13135	2.03432	15.216	17.6045	42.9248	57.5041	40.6368	54.0465	37.3265	4.56981	2.19213	4.75702e-05	0.000528472
HTR1D	0	0	0	9.60357	10.8158	0.340673	0.282344	0	0	0	-28.4023	-4.82793	4.77096e-05	0.000529629
SCX	0	0	0	0.74833	0.115062	5.11009	4.89396	5.04023	3.75016	5.12324	11.8193	3.56307	4.8049e-05	0.000533004
HSPE1-MOB4	75.5082	76.7181	77.3042	9.2294	2.30124	5.45077	5.83511	8.19037	2.42658	12.4422	-6.96831	-2.80081	4.82987e-05	0.000535379
ADAP1	0	0	0	0	0.115062	6.13211	5.64688	4.09518	3.75016	1.09784	55.4633	5.79346	4.85184e-05	0.000537023
USP11	3.71352	0	0	30.3074	28.7655	102.883	51.5749	100.49	54.0465	103.197	6.27098	2.64869	4.84935e-05	0.000537023
MIB2	6.18919	4.69703	6.10297	8.73052	10.9309	47.3535	20.3288	40.6368	18.3096	51.5984	4.35753	2.12351	4.90077e-05	0.00054204
CASZ1	9.90271	0	3.05148	4.73942	3.91211	0	0.564688	0.630028	0.220598	0	-11.5701	-3.53233	4.92708e-05	0.000544549
UBE2QL1	6.18919	6.2627	13.2231	0.249443	0	0	0.0941147	0	0	0	-89.3137	-6.48081	4.93559e-05	0.000544739
STAB2	12.3784	14.0911	4.06864	0	0.115062	0	0.188229	0	0.220598	0	-43.641	-5.44761	4.93604e-05	0.000544739
TMCC1	66.8433	73.5867	62.0468	32.1782	37.1651	11.5829	14.776	16.3807	15.5521	13.54	-3.55386	-1.82939	4.95377e-05	0.000546295
DCLK1	12.3784	4.69703	9.15445	0.249443	0	0	0	0	0.220598	0	-58.7727	-5.87707	4.96361e-05	0.000546979
BRIP1	8.66487	4.69703	5.08581	8.73052	13.002	58.2551	36.0459	40.6368	26.2511	25.6162	4.10258	2.03653	4.97726e-05	0.000548082
JHY	4.95136	4.69703	5.08581	12.9711	11.5062	2.04404	0.941147	2.52011	0.661793	2.19568	-6.12624	-2.615	5.08464e-05	0.00055935
ALDH3A2	21.0433	17.2224	26.4462	47.2695	48.2111	7.83548	5.36454	8.19037	7.50033	14.2719	-4.00675	-2.00243	5.08703e-05	0.00055935
CTF1	0	0	0	0.124722	0	4.76942	2.35287	5.35524	2.31628	6.22108	51.1918	5.67784	5.09978e-05	0.000560342
NOD2	13.6162	12.5254	8.13729	0.498887	0.115062	0	0	0	0	0	-249.853	-7.96493	5.11987e-05	0.000562139
RAB7B	0	0	0	0	0.230124	7.83548	1.22349	6.93031	0.882391	6.22108	37.0025	5.20955	5.14766e-05	0.000564778
CHIA	11.1406	15.6568	16.2746	0	0	0	0	0	0	0	-317.131	-8.30893	5.19528e-05	0.000569285
ARHGAP19-SLIT1	4.95136	4.69703	22.3775	0	0	0	0	0	0	0.365946	-79.4858	-6.31263	5.19631e-05	0.000569285
HSD11B1	0	0	0	0	0	12.2642	5.36454	11.6555	7.50033	23.7865	471.28	8.88044	5.20656e-05	0.000569994
DVL1	48.2757	21.9195	22.3775	24.5702	30.2614	108.334	72.9389	116.555	66.069	95.8779	3.15062	1.65563	5.23117e-05	0.000572271
RAMP1	0	0	0	0	0	8.51682	13.3643	7.24533	16.6551	9.14865	448.115	8.80773	5.23988e-05	0.000572529
RXRA	44.5622	34.4449	28.4805	19.706	23.3576	108.675	63.3392	96.3943	74.2312	91.1206	3.09694	1.63084	5.24114e-05	0.000572529
FLVCR2	0	1.56568	0	1.37194	1.841	20.4404	2.5411	19.8459	3.52956	11.3443	9.4291	3.23712	5.27133e-05	0.000575409
SSTR2	6.18919	4.69703	13.2231	0.124722	0.115062	0	0.0941147	0	0	0	-82.9806	-6.3747	5.30033e-05	0.000578155
METRN	3.71352	3.13135	2.03432	6.98441	8.5146	32.7046	17.0348	39.6918	15.883	35.8627	4.7623	2.25166	5.39833e-05	0.000588418
SGMS1	120.07	104.9	122.059	38.7884	40.2718	20.781	24.7522	24.8861	25.479	23.0546	-3.49569	-1.80558	5.40332e-05	0.000588535
HTR2B	0	0	2.03432	3.74165	3.3368	0	0	0	0.110299	0	-51.827	-5.69563	5.41203e-05	0.000589058
COQ8A	0	0	1.01716	1.7461	2.41631	23.1658	1.97641	17.3258	2.09568	31.4714	11.0336	3.46383	5.42502e-05	0.000590044
PCDHB7	9.90271	9.39405	10.1716	2.24499	1.49581	1.70336	0.376459	0.630028	0.220598	0	-10.798	-3.43269	5.44127e-05	0.000591384
EIF1AY	103.978	95.5062	113.922	42.9042	42.573	16.0116	31.999	18.2708	28.788	14.2719	-3.536	-1.82212	5.4974e-05	0.000597053
DAAM2	0	0	0	0.374165	0	5.45077	3.1999	3.78017	3.52956	2.92757	19.8019	4.30757	5.52912e-05	0.000600065
CTNNB1	3659.05	2180.99	2088.23	347.225	373.837	273.901	327.802	280.678	323.617	298.612	-5.74453	-2.52219	5.55951e-05	0.000602928
NFIX	50.7514	48.5359	40.6864	8.23163	10.8158	137.632	94.5853	132.621	109.747	141.621	4.03709	2.01332	5.59736e-05	0.000606595
ZMIZ1	92.8379	90.8092	122.059	53.1314	74.9055	367.586	198.582	383.057	210.23	327.156	3.47589	1.79738	5.64335e-05	0.0006107
FBXO17	0	0	0	12.098	10.7008	41.9028	25.0345	36.8567	30.1116	34.033	6.31021	2.65769	5.6394e-05	0.0006107
TANC1	107.692	126.82	159.694	200.178	206.652	41.2214	55.5277	36.2266	47.7594	72.8233	-3.20418	-1.67995	5.65742e-05	0.000611783
PAX2	13.6162	15.6568	12.2059	0	0	0	0	0	0	0	-304.735	-8.25141	5.68034e-05	0.00061382
gene:ENSG00000284976	0	3.13135	0	0	0	4.08807	2.5411	9.45043	1.21329	6.95298	25.3485	4.66383	5.74043e-05	0.000619867
CYP2J2	11.1406	6.2627	11.1888	0.124722	0.115062	0	0.282344	0	0	0.365946	-35.019	-5.13006	5.75459e-05	0.00062039
PLCL1	0	0	0	32.0535	30.8367	0.681346	0.0941147	1.26006	0	1.09784	-20.6447	-4.3677	5.75765e-05	0.00062039
TMSB15A	0	0	0	0.124722	0.345187	3.7474	3.01167	5.35524	2.09568	5.48919	15.9209	3.99285	5.75019e-05	0.00062039
GPR39	0	1.56568	0	0	0.115062	6.47279	4.42339	3.15014	3.08837	1.09784	27.6168	4.78748	5.84372e-05	0.000629214
TEC	14.8541	14.0911	12.2059	0	0.230124	0.340673	0.0941147	0.630028	0.220598	0.365946	-23.9553	-4.58227	5.86778e-05	0.000631353
WWC1	2.47568	1.56568	1.01716	0	0	2.38471	31.9049	6.30028	25.6996	0.731892	18.0347	4.1727	5.87988e-05	0.000631751
DOCK2	0	0	0	0.623608	0.575311	2.04404	7.52918	4.4102	8.27242	3.29351	10.5051	3.39302	5.87828e-05	0.000631751
TRABD2A	0	0	0	0	0	8.8575	11.6702	11.0255	10.1475	9.14865	417.759	8.70653	5.93161e-05	0.0006364
SNX30	23.5189	14.0911	17.2917	12.3474	13.8075	71.2006	32.5637	65.523	34.5236	69.5298	3.49859	1.80677	5.93047e-05	0.0006364
PANX2	0	0	0	4.98887	5.98323	45.9908	5.17631	40.0068	3.52956	32.9351	9.58566	3.26088	5.94504e-05	0.000637386
ANKRD46	73.0325	42.2732	29.4977	11.1002	11.2761	8.51682	7.15272	4.4102	7.16943	4.02541	-5.11508	-2.35476	5.95254e-05	0.000637736
PCDHGB6	19.8054	36.0105	26.4462	2.99332	5.63805	4.76942	1.69406	2.52011	1.98538	2.19568	-6.65185	-2.73376	5.95792e-05	0.000637858
MBOAT2	9.90271	12.5254	24.4119	24.8196	24.8534	42.5841	124.326	45.047	115.593	47.207	3.75097	1.90726	5.96742e-05	0.00063842
PDE3A	0	0	0	35.7951	30.1463	0.340673	0.658803	0.630028	0.772092	1.82973	-15.708	-3.97343	5.97214e-05	0.000638472
SLCO3A1	204.243	95.5062	104.768	0	0	6.13211	5.27042	5.35524	6.28704	5.12324	-14.2609	-3.834	6.02139e-05	0.00064328
SLC2A13	0	0	0	7.4833	7.82423	17.715	31.3402	24.8861	34.7442	17.1995	6.25056	2.64399	6.04291e-05	0.00064512
ATF5	51.9892	148.739	185.123	38.2895	40.5019	31.3419	19.5759	31.8164	17.9787	20.8589	-3.78863	-1.92167	6.0479e-05	0.000645196
LHX2	7.42703	9.39405	11.1888	0	0	0	0	0.315014	0	0	-72.0365	-6.17066	6.09783e-05	0.00065006
PARP15	0	0	0	13.5947	11.9665	0	0.282344	0.630028	0.220598	0.365946	-17.256	-4.10903	6.10793e-05	0.000650676
HNRNPCL1	12.3784	6.2627	16.2746	0.124722	0.115062	0	0	0	0	0	-256.239	-8.00135	6.14892e-05	0.000654579
LPAR6	21.0433	14.0911	9.15445	13.0958	14.843	1.70336	2.5411	3.46516	4.19136	2.92757	-4.47861	-2.16305	6.21562e-05	0.000661212
FIBIN	0	0	0	0	0	16.0116	7.34095	17.6408	9.7063	5.12324	437.881	8.7744	6.22281e-05	0.000661509
IMMP1L	47.0379	37.5762	43.7379	4.24054	4.02718	3.40673	3.76459	4.4102	2.86777	5.12324	-6.79135	-2.7637	6.28329e-05	0.000667466
DMKN	0	0	0	0	0.115062	2.72538	2.63521	5.35524	4.52226	2.92757	47.0659	5.55661	6.31149e-05	0.000669989
STIM1	157.206	129.951	111.888	59.3675	64.78	33.7266	23.1522	34.6516	23.1628	39.5222	-3.35143	-1.74478	6.32563e-05	0.000671016
MTF2	70.5568	140.911	127.145	24.4454	27.0396	13.2862	25.2227	12.6006	22.8319	14.6378	-4.3054	-2.10615	6.40919e-05	0.000679401
SOWAHC	0	0	0	4.24054	3.68199	8.8575	27.105	14.1756	25.2584	7.68487	7.00553	2.80849	6.43138e-05	0.000681273
FRMD5	1.23784	0	0	38.539	43.0333	1.02202	1.03526	2.2051	1.54418	1.46378	-11.5364	-3.52812	6.49095e-05	0.0006871
PIP5K1B	4.95136	7.82838	11.1888	0	0.230124	0	0.0941147	0	0	0	-82.5641	-6.36744	6.50593e-05	0.000688201
VANGL2	6.18919	9.39405	20.3432	0	0	0.681346	0	0	0	0	-50.7326	-5.66484	6.52494e-05	0.000689727
ADAMTS18	0	0	0	9.60357	17.3744	0	0	0	0	0	-213.107	-7.73544	6.52999e-05	0.000689776
SLC43A2	3.71352	10.9597	12.2059	57.9956	62.0185	4.42875	4.32928	7.56034	4.41196	6.22108	-5.65457	-2.49942	6.56722e-05	0.00069309
SLCO4A1	4.95136	3.13135	1.01716	4.11581	4.14224	0	0	0	0	0	-148.921	-7.21841	6.57058e-05	0.00069309
ZNF804A	0	0	0	10.2272	10.4707	22.1437	52.4219	18.9009	52.392	16.8335	6.84638	2.77534	6.6957e-05	0.000705793
VASH2	0	1.56568	5.08581	0.124722	0	6.47279	4.42339	6.93031	5.73554	5.48919	13.9469	3.80188	6.81486e-05	0.000717349
BNIP3	6.18919	7.82838	7.12013	73.0869	66.0457	86.8716	324.225	86.6289	334.316	97.7076	5.67027	2.50342	6.813e-05	0.000717349
UCN2	0	0	0	0	0	26.9132	1.97641	20.7909	2.53687	11.7103	503.147	8.97484	6.82255e-05	0.000717656
FADS2	38.373	20.3538	18.3089	99.4032	113.681	266.066	257.874	278.473	268.798	172.727	4.18498	2.06522	6.89247e-05	0.000724504
CDK6	28.4703	32.8792	50.8581	123.724	135.198	196.228	591.793	190.899	585.797	139.06	4.53499	2.1811	6.92178e-05	0.000727077
TRPC6	0	0	0	0.124722	0	4.08807	3.76459	1.57507	3.63986	4.02541	45.9287	5.52132	7.0076e-05	0.000735578
gene:ENSG00000259753	80.4595	78.2838	96.6303	1.49666	0	0	0	0	0	9.14865	-28.0833	-4.81164	7.10941e-05	0.000745744
GUCY1A2	0	0	0	11.7238	13.9225	0	0	0	0	0	-203.331	-7.66769	7.12292e-05	0.000746641
KCNJ8	0	0	0	0	0	11.5829	12.5173	7.56034	12.0226	5.12324	398.044	8.63678	7.1965e-05	0.000753828
COBL	25.9946	4.69703	9.15445	0	0	0	0	0	0	0	-294.02	-8.19977	7.20852e-05	0.000754562
ELL2	11.1406	7.82838	14.2403	106.138	94.1209	122.983	561.771	124.116	556.017	99.1714	6.18102	2.62785	7.29578e-05	0.000763165
ADCY7	0	0	0	18.0846	20.1359	68.8159	56.2806	69.6181	50.4066	33.3011	6.81127	2.76792	7.35621e-05	0.000768728
MTRNR2L10	28.4703	7.82838	4.06864	0	0	0	0	0	0	0	-297.362	-8.21608	7.35919e-05	0.000768728
RPS10-NUDT3	85.4109	50.1016	69.167	24.5702	22.7823	7.4948	15.5289	13.2306	16.4345	6.22108	-4.11497	-2.04088	7.44679e-05	0.000777039
RUNDC3A	9.90271	7.82838	7.12013	0	0.115062	0	0	0.315014	0.110299	0	-45.0552	-5.49362	7.44908e-05	0.000777039
EPHB4	300.795	284.953	334.646	164.882	188.012	82.1022	49.5984	104.585	51.7302	96.6098	-3.3056	-1.72491	7.48095e-05	0.000779823
HILPDA	0	0	0	4.48998	5.29286	17.0336	25.1286	16.3807	24.2658	11.3443	5.74976	2.5235	7.51041e-05	0.000782076
SCARA3	0	0	0	33.3007	38.776	160.116	68.3273	148.687	59.2305	154.795	7.98339	2.997	7.51296e-05	0.000782076
IFIH1	12.3784	43.8389	32.5492	15.9644	12.5418	4.08807	6.21157	2.83513	6.61793	2.56162	-4.77116	-2.25434	7.6213e-05	0.000792346
GNAI1	0	1.56568	1.01716	17.8352	20.5961	49.7382	49.1279	52.6074	53.1641	58.1854	5.81547	2.5399	7.62215e-05	0.000792346
GIMAP2	0	0	0	11.8486	12.6568	0	0	0	0	0	-194.893	-7.60654	7.62814e-05	0.00079242
PRPS1L1	12.3784	7.82838	17.2917	0	0	0	0	0	0	0	-276.223	-8.10969	7.65837e-05	0.000795012
gene:ENSG00000273398	23.5189	29.7478	29.4977	2.12027	1.61087	0	2.25875	1.89009	3.08837	0	-11.0203	-3.46209	7.69223e-05	0.000797976
NBPF19	0	0	0	11.9733	11.2761	43.6061	28.8932	35.2816	26.2511	38.0584	6.37444	2.6723	7.71834e-05	0.000800133
SSBP2	3.71352	0	2.03432	9.72829	8.5146	33.7266	15.1525	30.8714	19.9641	51.9643	5.13937	2.36159	7.83177e-05	0.000811332
ABCC5	365.162	303.741	326.509	38.6637	45.6797	54.8483	33.4107	54.8125	37.7222	42.8157	-4.81079	-2.26627	7.87347e-05	0.000815091
C15orf48	40.8487	23.4851	15.2574	0.374165	0.460249	0.340673	1.97641	0.945043	1.87508	0.365946	-13.3798	-3.74198	8.04544e-05	0.000832321
CLEC3B	0	0	0	0.124722	0	3.7474	5.08219	2.52011	5.29435	1.09784	49.2858	5.6231	8.05772e-05	0.000833019
GBP2	0	0	0	70.5925	61.5583	2.04404	0.282344	2.52011	0.330897	3.29351	-15.7939	-3.98129	8.07085e-05	0.000833803
SPECC1	39.6108	42.2732	30.5148	19.706	17.3744	10.2202	3.38813	9.45043	3.41927	7.68487	-4.36359	-2.12552	8.08652e-05	0.000834848
SOCS2	2.47568	7.82838	1.01716	2.49443	1.72593	8.51682	17.1289	8.8204	17.3169	17.5654	5.83841	2.54558	8.11547e-05	0.000837262
HEY2	0	0	0	7.98219	7.13386	0	0.0941147	0	0	0	-60.5589	-5.92027	8.13493e-05	0.000838465
NPY4R	0	0	0	0	0	15.671	8.28209	11.6555	9.26511	4.39135	387.545	8.59822	8.13827e-05	0.000838465
TUSC1	0	0	0	1.12249	1.61087	11.5829	6.87037	9.76544	6.28704	6.58703	6.58096	2.7183	8.19809e-05	0.00084405
UBD	0	0	0	16.3385	8.05435	0	0	0	0	0	-193.857	-7.59885	8.22539e-05	0.000846281
RGS3	48.2757	53.233	42.7208	86.0579	95.9619	19.759	13.7407	25.8312	15.7727	18.2973	-3.65498	-1.86986	8.24708e-05	0.000847933
PCSK1	0	0	0	6.73497	7.82423	0	0	0	0.110299	0	-56.3593	-5.81658	8.36132e-05	0.000859091
SIK1	6.18919	20.3538	6.10297	0	0.345187	0	0	0	0	0	-236.769	-7.88734	8.37085e-05	0.000859483
BEAN1	12.3784	15.6568	12.2059	0	0	0.340673	0.188229	0.315014	0.220598	0.365946	-25.8716	-4.6933	8.38326e-05	0.000860171
TMEM251	35.8973	18.7881	37.635	9.85301	9.78029	4.42875	4.51751	3.46516	4.19136	5.48919	-4.78551	-2.25867	8.65064e-05	0.000887001
SLITRK4	0	0	0	9.85301	13.8075	0	0	0	0	0	-188.615	-7.5593	8.70355e-05	0.000891817
RAPH1	178.249	228.589	240.05	112.249	118.399	34.0673	81.0328	23.9411	75.2239	21.9568	-3.67156	-1.87639	8.7277e-05	0.000893683
ATF7IP2	0	0	0	6.85969	5.75311	0	0.0941147	0	0.110299	0	-34.1735	-5.09481	8.75755e-05	0.00089613
YIPF2	7.42703	1.56568	7.12013	23.8218	22.6673	71.2006	43.6692	67.7281	43.1269	83.4357	4.414	2.14209	8.77068e-05	0.000896863
TSKU	3.71352	3.13135	2.03432	12.3474	10.7008	47.6942	20.3288	45.047	22.3907	37.3265	4.49767	2.16918	8.78807e-05	0.000898031
ZNF462	144.827	131.517	103.75	8.23163	10.4707	14.3083	15.2466	13.5456	13.6771	14.2719	-5.54859	-2.47212	8.8177e-05	0.000900447
COMMD3	149.779	140.911	130.197	35.7951	28.8806	24.5284	25.5992	23.3111	27.7953	32.5692	-3.57523	-1.83804	8.82582e-05	0.000900664
ARNT2	40.8487	28.1822	38.6521	0.124722	0	0.340673	1.12938	1.26006	1.54418	2.19568	-16.1664	-4.01493	8.85951e-05	0.000903489
ANKRD28	103.978	82.9808	84.4244	77.5769	89.2883	220.756	321.872	245.711	346.228	233.474	3.15903	1.65948	8.94419e-05	0.000911507
P2RX4	18.5676	15.6568	14.2403	20.9532	21.1714	4.76942	5.17631	4.72521	5.29435	6.22108	-3.88147	-1.9566	8.96779e-05	0.000913294
C11orf87	0	0	0	0	0	8.17615	14.3995	4.4102	17.4272	4.39135	394.498	8.62387	9.07788e-05	0.00092388
SLC22A18	2.47568	1.56568	1.01716	0.249443	0.345187	2.38471	5.27042	3.78017	5.62524	9.88054	9.67515	3.27428	9.15857e-05	0.000931462
ARHGEF19	0	0	0	2.49443	2.18618	14.6489	6.11746	16.0657	7.94152	12.8081	6.31831	2.65954	9.21702e-05	0.000936673
FHIP2B	11.1406	4.69703	11.1888	19.3319	19.6756	65.7499	38.0223	62.6878	45.6637	65.1384	3.58845	1.84336	9.22226e-05	0.000936673
MDFI	0	3.13135	0	7.10913	6.32842	0.340673	0.0941147	0.630028	0.110299	0.365946	-13.865	-3.79338	9.24506e-05	0.000938355
CPLX2	11.1406	14.0911	10.1716	0	0	0	0	0	0	0	-258.752	-8.01543	9.27885e-05	0.000941149
MMP28	17.3297	6.2627	8.13729	0	0	0.340673	0	0.315014	0.110299	0	-37.7069	-5.23676	9.42703e-05	0.000955535
TSTD1	0	0	1.01716	5.23831	4.37236	0.340673	0	0	0	0	-40.0545	-5.32389	9.44036e-05	0.000956242
IKZF4	0	0	0	3.36748	2.41631	12.6049	6.49391	15.4357	5.62524	30.7395	7.83968	2.9708	9.50846e-05	0.000962492
SOX4	174.535	316.266	315.32	118.361	142.907	44.6282	67.8567	45.9921	79.3049	57.8195	-3.56746	-1.8349	9.55253e-05	0.000966303
FIG4	53.2271	79.8494	90.5273	33.5501	27.9601	13.2862	15.2466	15.7507	14.3389	19.7611	-3.52711	-1.81849	9.59495e-05	0.000969941
VWA1	0	0	0	3.61693	2.64643	22.4844	8.9409	19.8459	9.48571	12.4422	6.53996	2.70928	9.6581e-05	0.000975015
NOVA1	0	1.56568	0	5.48775	4.94767	0.340673	0	0	0	0.365946	-24.34	-4.60526	9.65758e-05	0.000975015
MGST2	3.71352	7.82838	18.3089	30.5568	28.4204	2.72538	4.14105	4.72521	3.75016	4.7573	-4.7655	-2.25263	9.66989e-05	0.000975549
RNF24	7.42703	6.2627	5.08581	18.5835	22.5522	36.1113	57.7864	52.2924	64.3043	57.4535	3.87249	1.95326	9.82609e-05	0.000990644
PPP1R14A	0	0	0	0.249443	0.460249	4.42875	3.48224	4.4102	3.08837	5.85514	11.2778	3.49541	9.87551e-05	0.000994959
TFPI2	0	0	0	756.936	679.097	22.1437	15.5289	20.1609	13.7874	9.5146	-17.6855	-4.1445	9.90186e-05	0.000996947
IPO11	80.4595	101.769	95.6131	109.131	114.832	21.8031	46.1162	19.5309	47.0976	17.9314	-3.25118	-1.70097	9.93251e-05	0.000999363
CASS4	0	0	2.03432	0	0	1.36269	3.95282	2.52011	3.63986	3.65946	26.3171	4.71793	9.98235e-05	0.00100371
PCDHGB5	2.47568	3.13135	3.05148	20.8285	24.3932	2.04404	1.59995	1.89009	1.54418	2.19568	-6.42314	-2.68328	0.000100134	0.00100615
RRAD	0	0	0	0.873052	0.230124	3.7474	3.38813	5.98527	2.42658	10.9784	11.2112	3.48687	0.000100235	0.00100649
ORAI1	59.4163	37.5762	38.6521	21.7016	24.048	13.9676	7.34095	12.2856	6.39734	6.95298	-3.77569	-1.91674	0.000101271	0.00101622
RAB6D	3.71352	10.9597	4.06864	0.124722	0.345187	0	0.0941147	0	0.110299	0	-39.2598	-5.29498	0.000101505	0.00101672
CBFA2T3	3.71352	12.5254	8.13729	0.124722	0	0	0	0	0.110299	0.365946	-42.797	-5.41944	0.000101489	0.00101672
KLHL13	2.47568	0	1.01716	5.36303	4.94767	0	0	0	0	0	-140.309	-7.13246	0.000101523	0.00101672
CHRNB1	30.946	31.3135	27.4634	2.8686	3.56693	3.40673	1.59995	0.945043	2.09568	5.12324	-7.12826	-2.83355	0.00010178	0.00101861
BCAS4	2.47568	0	0	0.997773	1.15062	7.4948	7.62329	6.6153	6.06644	5.85514	6.40654	2.67955	0.000102312	0.00102325
RGS16	23.5189	4.69703	1.01716	0.124722	0	0	0	0	0.330897	0	-51.4234	-5.68435	0.000102597	0.00102483
COMMD1	94.0758	126.82	109.853	19.8307	15.9936	14.9896	16.1877	15.7507	16.986	16.8335	-4.46069	-2.15727	0.000102674	0.00102483
SYN2	13.6162	4.69703	8.13729	0.124722	0.230124	0	0.188229	0	0.441196	0	-26.9002	-4.74955	0.000102648	0.00102483
gene:ENSG00000285304	0	0	0	0	0	3.7474	10.3526	5.67026	8.82391	17.9314	368.015	8.52362	0.000103113	0.00102853
EVC	2.47568	1.56568	0	26.1915	33.4831	82.4428	66.9156	80.9586	65.7381	75.0189	5.51841	2.46425	0.000103222	0.00102893
PLCXD1	0	0	0	8.23163	8.97485	31.0012	24.9404	23.9411	20.4053	33.3011	5.99395	2.58351	0.000103624	0.00103226
ANGPT1	0	0	0	14.7172	15.5334	27.5945	62.9627	23.6261	75.7753	35.8627	6.85858	2.77791	0.000103867	0.001034
FZD7	28.4703	15.6568	20.3432	0.124722	0.345187	98.1138	70.6801	104.585	74.7827	98.0735	7.07369	2.82246	0.00010403	0.00103493
HSPB8	0	0	0	7.85746	9.32004	39.5181	14.6819	40.3218	15.1109	27.8119	6.57675	2.71737	0.000104853	0.00104244
HTR2A	7.42703	10.9597	9.15445	0	0	0	0.188229	0	0.220598	0	-39.8134	-5.31518	0.000105166	0.00104485
RERG	0	0	0	0	0	7.15413	8.75267	3.15014	13.3462	12.8081	361.177	8.49656	0.000105568	0.00104816
CHAC1	16.0919	1.56568	7.12013	1.99555	1.26568	29.2979	29.7402	29.2963	30.8837	14.6378	5.46853	2.45115	0.000105696	0.00104873
SLC1A4	18.5676	9.39405	15.2574	1.87082	2.30124	71.2006	20.7052	78.7535	21.7289	40.986	5.27031	2.39789	0.00010655	0.00105651
ACSBG1	9.90271	6.2627	10.1716	0.124722	0.230124	0	0	0	0.551495	0	-30.5714	-4.93411	0.000106959	0.00105987
RSAD2	1.23784	3.13135	8.13729	1.87082	0.690373	0	0	0	0.110299	0	-44.0624	-5.46147	0.000107125	0.00106082
RAB11FIP1	0	0	0	5.36303	7.01879	25.5505	25.5051	31.5014	24.1555	32.5692	5.37574	2.42646	0.000108286	0.00107161
AKT2	48.2757	37.5762	40.6864	17.9599	21.4016	121.28	72.8448	124.116	72.2458	115.639	3.21441	1.68455	0.000108586	0.00107387
SLC22A15	4.95136	10.9597	6.10297	0	0.115062	0	0	0	0	0.365946	-54.8369	-5.77707	0.000111085	0.00109786
UGT1A7	7.42703	12.5254	13.2231	0	0	0	0	0	0	0	-242.484	-7.92175	0.000111549	0.00110172
DAAM1	108.93	111.163	117.991	34.2985	41.6525	29.6385	20.7052	27.7212	22.2804	20.8589	-3.35002	-1.74417	0.000111956	0.00110502
RCOR2	0	0	0	0.623608	0.690373	5.79144	3.38813	7.87535	4.74285	4.7573	8.5482	3.09562	0.000112448	0.00110914
ENHO	7.42703	14.0911	9.15445	0	0.115062	0	0	0	0	0	-222.152	-7.7954	0.000112814	0.00111202
DIO2	0	0	0	10.9755	14.728	0.681346	0.282344	0.315014	0.441196	0	-14.9091	-3.89813	0.000113118	0.00111429
ATP6V1H	323.076	310.004	289.891	66.2272	65.1252	48.3756	43.6692	62.6878	44.4505	57.0876	-4.09073	-2.03236	0.0001154	0.00113575
VASP	232.714	338.186	351.938	143.804	144.173	71.2006	80.0916	68.9881	77.4298	62.5768	-3.32091	-1.73158	0.000115447	0.00113575
DLG1	178.249	194.144	201.398	230.236	299.622	54.8483	89.6913	58.2776	87.1361	48.6708	-3.25737	-1.70371	0.000116239	0.00114279
STK32B	0	0	0	15.4655	14.843	0	0.564688	0.315014	0.772092	0.365946	-14.1676	-3.82452	0.00011663	0.00114588
FAXDC2	0	0	0	1.87082	1.26568	21.1217	0.282344	13.5456	0.330897	38.7903	17.1946	4.10388	0.000116823	0.00114703
UBXN6	6.18919	12.5254	3.05148	42.0312	43.2634	108.675	58.257	99.8595	65.4073	129.179	4.11561	2.04111	0.000117813	0.001156
SPEF2	0	0	0	0.374165	0.460249	2.72538	5.64688	1.57507	6.39734	4.02541	11.5544	3.53037	0.000118182	0.00115886
HS3ST1	2.47568	0	1.01716	5.61247	4.2573	0	0	0	0	0	-135.109	-7.07798	0.000118693	0.00116311
APLP2	873.914	690.463	716.081	3819.6	3844.11	312.397	491.373	316.904	454.873	376.193	-5.0974	-2.34976	0.000119169	0.00116702
HS6ST1	21.0433	31.3135	28.4805	20.0802	24.8534	128.434	40.9399	117.815	38.4943	84.1676	3.28818	1.71729	0.000119803	0.00117247
LRRC8E	0	0	0	3.99109	2.76149	20.4404	12.2349	20.7909	10.2578	15.7357	6.14452	2.6193	0.000120051	0.00117413
CCSER1	19.8054	7.82838	5.08581	0	0	0	0	0	0	0	-239.234	-7.90228	0.00012055	0.00117824
MYO7A	12.3784	6.2627	4.06864	0.623608	0.115062	0	0.188229	0.630028	0	0	-24.2444	-4.59958	0.000121422	0.00118599
NOTCH2	23.5189	32.8792	37.635	140.561	163.618	309.331	330.813	330.135	336.743	316.909	4.00473	2.00171	0.000122622	0.00119644
SRRM3	0	0	0	0.623608	0.115062	6.47279	2.82344	5.35524	2.42658	4.39135	12.2243	3.61168	0.000122669	0.00119644
GAL	0	0	0	0.623608	0.460249	11.2422	0.847032	10.7105	1.43389	5.85514	14.179	3.82568	0.00012273	0.00119644
CCN3	7.42703	10.9597	18.3089	0.623608	0.230124	0.340673	0.188229	0.630028	0.330897	1.09784	-14.1338	-3.82108	0.000124145	0.00120945
PPP1R2B	11.1406	3.13135	9.15445	0	0	0	0.0941147	0	0	0	-82.5822	-6.36776	0.000125195	0.00121889
MAGEF1	0	1.56568	0	8.10691	5.06274	23.8471	16.2818	28.9813	15.3315	29.6416	5.53153	2.46768	0.000126238	0.00122825
PLCB2	0	0	0	12.4722	11.9665	0	0.376459	0.630028	0.330897	0.365946	-14.3998	-3.84797	0.000126595	0.00123093
FKBP11	7.42703	4.69703	9.15445	17.2116	16.4539	60.2991	46.6809	59.2227	41.5827	43.1816	3.61951	1.8558	0.00012746	0.001238
PIR	0	0	0	32.3029	31.8722	2.04404	0.847032	0.945043	0.551495	0.365946	-13.6565	-3.77152	0.000127487	0.001238
EPHA2	100.265	109.597	102.733	157.274	160.742	40.5401	54.5865	33.0765	55.7009	41.7179	-2.82468	-1.49809	0.000127933	0.00124073
LY6E	0	0	0	23.0735	23.1275	74.948	57.5982	73.7133	62.2086	63.3087	6.81101	2.76787	0.000127894	0.00124073
RGL2	115.119	115.86	96.6303	52.3831	45.9098	25.8911	19.1994	28.6663	22.2804	37.3265	-3.14009	-1.65081	0.00012988	0.00125879
PCNX2	0	0	0	11.1002	10.3556	34.408	26.8227	28.3513	29.3395	32.5692	5.91029	2.56323	0.000131691	0.00127553
VSIR	4.95136	9.39405	7.12013	5.7372	4.2573	0.340673	0.0941147	2.2051	0.99269	0	-8.36032	-3.06356	0.000132188	0.00127952
UGT1A4	12.3784	6.2627	5.08581	0	0	0	0	0	0	0.365946	-58.4699	-5.86962	0.000133491	0.0012913
CCDC184	7.42703	9.39405	11.1888	0.249443	0.115062	0	0.188229	0.315014	0.330897	0.365946	-19.7837	-4.30624	0.000133808	0.00129354
SUGP2	17.3297	18.7881	5.08581	74.4588	72.6042	174.425	138.349	131.046	130.594	170.531	3.84211	1.9419	0.000136083	0.00131469
SASH1	100.265	93.9405	102.733	192.82	235.647	56.5517	33.2225	49.7722	30.994	68.066	-3.09583	-1.63032	0.000137368	0.00132559
BLNK	14.8541	6.2627	5.08581	0.124722	0	0	0	0.315014	0.110299	0.365946	-30.8303	-4.94628	0.000137388	0.00132559
P3H4	12.3784	9.39405	10.1716	35.421	38.6609	93.0037	64.845	96.0793	62.8704	83.4357	3.46848	1.7943	0.000137546	0.00132626
RUNX1	35.8973	14.0911	12.2059	42.7795	41.6525	79.3768	152.936	72.7683	154.749	70.9935	3.49931	1.80707	0.000138542	0.00133501
FRRS1	0	0	0	1.99555	1.15062	7.4948	5.08219	10.7105	5.95614	13.54	6.61871	2.72655	0.000138716	0.00133574
UBB	3056.22	2184.12	2369.99	412.829	388.91	341.354	322.249	361.636	308.727	345.087	-5.00674	-2.32387	0.000138795	0.00133574
RALGPS2	8.66487	25.0508	24.4119	21.3274	25.1986	77.6734	55.5277	73.7133	60.9953	81.606	3.13963	1.65059	0.000139173	0.00133852
XPOT	54.4649	86.1121	97.6475	144.677	146.474	374.74	398.388	354.706	416.378	248.843	3.3148	1.72892	0.000140874	0.00135315
ALDH2	230.238	241.114	234.964	85.8085	78.3574	59.9584	37.6459	56.0725	40.1488	63.3087	-3.36103	-1.7489	0.000140875	0.00135315
ORMDL3	9.90271	3.13135	6.10297	12.8463	14.4978	54.8483	31.5284	46.3071	29.6704	43.5476	3.69015	1.88368	0.000141089	0.00135434
gene:ENSG00000288725	0	0	0	3.11804	7.24892	18.0557	16.6583	24.2561	9.04451	23.4205	6.02595	2.59119	0.000141976	0.00136199
PPIC	115.119	120.557	138.334	42.2806	38.5458	23.5064	29.6461	30.2414	31.1043	24.1524	-3.20844	-1.68187	0.000143144	0.00137232
SPECC1L-ADORA2A	0	0	6.10297	23.5724	1.38075	0	0.564688	0	0.441196	1.09784	-14.4635	-3.85435	0.000143341	0.00137333
ADH7	13.6162	3.13135	14.2403	0	0	0	0	0	0	0	-227.931	-7.83245	0.000143636	0.00137529
A2M	0	0	0	12.4722	7.36398	0	0	0	0	0	-160.331	-7.32491	0.000144786	0.00138541
HOXB3	24.7568	10.9597	22.3775	27.0646	27.1547	81.0802	54.8689	78.1235	56.6936	93.6822	2.98398	1.57724	0.000145186	0.00138836
ZNF385A	43.3244	45.4046	40.6864	5.48775	3.91211	3.40673	2.44698	5.35524	1.87508	8.41676	-6.3864	-2.675	0.000146163	0.00139682
ATP5MC3	644.914	510.41	512.649	131.956	121.276	86.8716	116.608	86.3139	118.24	82.3379	-3.90028	-1.96358	0.000146728	0.00140133
DMPK	7.42703	4.69703	14.2403	16.588	13.6924	66.7719	25.9757	49.7722	24.4864	68.4319	3.8262	1.93591	0.000146952	0.00140257
ENO3	47.0379	17.2224	56.961	0.997773	1.38075	4.08807	1.03526	2.52011	1.98538	4.02541	-8.98866	-3.16811	0.000147629	0.00140814
PLXNA2	413.438	367.934	444.499	521.711	642.047	34.408	223.334	30.5564	198.979	40.62	-4.51784	-2.17563	0.000148169	0.00141239
ST14	13.6162	7.82838	5.08581	0.249443	0	0	0	0	0	0	-191.81	-7.58353	0.000151035	0.00143881
ESD	959.325	800.06	885.947	109.131	101.6	107.653	141.266	102.38	146.036	102.099	-4.75436	-2.24925	0.000153511	0.00146147
CCNB1IP1	0	0	0	13.4699	13.4623	31.6826	33.6931	34.6516	35.0751	45.3773	5.94734	2.57224	0.00015591	0.00148242
BCL2A1	0	0	1.01716	4.24054	4.83261	0	0.282344	0	0.110299	0	-18.049	-4.17385	0.000155899	0.00148242
ANKZF1	16.0919	17.2224	12.2059	9.2294	10.3556	41.9028	30.4932	36.8567	31.5455	47.207	3.32182	1.73197	0.00015618	0.00148406
SLC39A14	13.6162	9.39405	12.2059	79.6971	73.1796	130.137	212.982	126.006	224.238	81.9719	4.0088	2.00317	0.000156487	0.00148604
MDFIC	13.6162	18.7881	10.1716	25.3185	23.5877	55.5297	81.6916	57.3326	79.9667	58.5514	3.30053	1.7227	0.000157006	0.00149002
gene:ENSG00000256029	0	0	0	1.24722	1.03556	11.2422	2.16464	10.0805	4.63255	8.05081	8.04079	3.00734	0.00015805	0.00149899
ASAH2	17.3297	23.4851	26.4462	1.24722	1.15062	1.02202	1.97641	0	1.98538	1.82973	-9.48042	-3.24495	0.0001585	0.0015023
LAMC2	6.18919	1.56568	2.03432	46.3965	55.9202	5.11009	2.63521	4.09518	2.42658	2.92757	-6.74162	-2.7531	0.000159735	0.00151305
C16orf89	37.1352	29.7478	19.3261	0	0	0.681346	0.0941147	0.945043	0	2.19568	-22.0673	-4.46384	0.00016096	0.0015237
PTPN12	397.346	436.823	437.379	224.125	230.93	84.4869	140.607	86.6289	132.469	88.5589	-3.2077	-1.68154	0.000161071	0.00152379
NUP210L	3.71352	10.9597	8.13729	0.374165	0.115062	0	0.188229	0.315014	0.110299	0.365946	-20.0479	-4.32538	0.000161818	0.00152989
LRIG3	6.18919	4.69703	3.05148	14.5924	18.8702	69.8379	20.4229	66.153	20.295	53.4281	4.41412	2.14213	0.000162688	0.00153716
RHBDF2	48.2757	40.7076	72.2184	34.049	34.4036	3.06606	16.7524	7.56034	22.501	4.02541	-4.12532	-2.0445	0.000163436	0.00154326
NOTCH2NLC	0	0	0	7.60802	9.32004	20.781	33.7872	15.7507	36.2883	17.9314	5.93197	2.56851	0.000163681	0.00154378
MBNL1	1006.36	920.617	704.893	596.045	623.292	156.71	253.921	172.943	256.776	142.719	-3.89538	-1.96176	0.000163697	0.00154378
CDH26	24.7568	3.13135	9.15445	0	0	0	0.0941147	0.315014	0.110299	0.731892	-28.365	-4.82604	0.000164961	0.00155473
COL12A1	0	0	1.01716	251.938	260.041	1861.1	783.317	1592.4	902.135	1711.53	13.3159	3.73508	0.000165972	0.00156328
CUL3	566.93	649.755	606.228	118.86	114.602	86.8716	113.785	82.5337	113.828	99.5373	-4.12576	-2.04466	0.00016909	0.00159165
GP6	0	0	0	9.47885	8.97485	0	0	0	0	0	-150.35	-7.23218	0.000171118	0.00160973
PSEN2	7.42703	14.0911	10.1716	7.73274	7.70917	2.04404	1.31761	1.57507	1.65448	3.65946	-4.54018	-2.18275	0.000173263	0.00162889
TFDP2	14.8541	10.9597	8.13729	11.2249	10.8158	70.5193	14.8701	58.9077	15.4418	70.6276	4.10371	2.03693	0.000174109	0.00163582
PPP1CA	454.287	486.925	509.598	145.301	137.154	104.587	85.0797	111.2	81.9521	110.15	-3.50173	-1.80807	0.000176449	0.00165677
EVI2B	1.23784	0	0	6.11136	7.24892	0.340673	0.376459	0	0.220598	0.365946	-12.2473	-3.61439	0.000176708	0.00165817
GBP7	9.90271	15.6568	2.03432	0	0.115062	0	0	0	0	0	-198.295	-7.6315	0.000179122	0.00167768
ATF2	131.211	172.224	149.523	55.127	57.5311	31.6826	42.1634	28.9813	42.4651	30.3735	-3.14763	-1.65426	0.000178958	0.00167768
FAM162B	0	0	0	0	0	8.17615	6.68214	7.56034	7.61062	6.58703	286.118	8.16046	0.000179096	0.00167768
RGMB	19.8054	7.82838	20.3432	85.5591	94.6962	149.555	315.378	158.452	312.146	90.0227	4.39919	2.13724	0.000179341	0.00167869
HOXD1	0	0	0	9.10468	9.08991	0	0	0	0	0	-148.459	-7.21392	0.000179634	0.00168039
RAPGEF1	273.562	248.942	310.234	124.971	144.173	86.5309	38.8694	83.4788	39.8179	75.7508	-3.39008	-1.76132	0.000181079	0.00169285
CYBRD1	0	0	0	45.1492	51.0876	141.039	132.796	132.621	142.727	149.306	7.11882	2.83164	0.000181446	0.00169523
RNF112	0	0	0	0	0.115062	3.7474	2.63521	5.04023	1.98538	2.56162	38.3679	5.26183	0.000181565	0.00169528
gene:ENSG00000256514	0	0	0	1.99555	0	16.3523	0	23.9411	1.76478	17.9314	21.0951	4.39884	0.000182407	0.00170209
ARPC1B	600.352	770.312	1102.6	173.114	180.878	145.808	140.513	131.046	136.44	129.911	-4.12585	-2.04469	0.000183711	0.00171213
AFF2	0	0	0	6.11136	5.1778	0.340673	0	0	0	0	-36.1292	-5.17509	0.000183625	0.00171213
FBXL14	49.5136	46.9703	45.7723	4.73942	3.79705	5.45077	2.16464	6.6153	2.53687	8.05081	-6.01473	-2.5885	0.000183994	0.00171371
MGAT1	49.5136	31.3135	36.6178	65.1047	76.1712	211.899	121.22	218.935	125.52	166.871	3.13597	1.64891	0.000184366	0.00171611
TM4SF1	95.3136	68.8897	82.3901	634.709	664.714	49.7382	77.0799	73.0833	72.687	75.3849	-4.45599	-2.15575	0.000185265	0.00172341
TNFAIP1	230.238	200.406	182.072	120.356	116.213	58.5957	53.1748	52.9224	50.8478	64.7725	-2.97609	-1.57342	0.000185493	0.00172447
CDT1	13.6162	6.2627	3.05148	5.61247	5.98323	30.6606	19.9523	32.1314	18.7508	21.2249	3.86002	1.94861	0.000186303	0.00173093
CHL1	0	0	0	0	0	17.3743	0.282344	12.2856	1.10299	19.0292	395.221	8.62651	0.000186756	0.0017334
RAP1GAP2	6.18919	9.39405	12.2059	0	0.230124	0	0.470574	0.315014	0.110299	0	-23.4514	-4.5516	0.0001868	0.0017334
TARBP1	2.47568	1.56568	3.05148	19.706	19.9058	43.6061	56.3747	34.6516	56.1421	44.2795	4.43954	2.15041	0.000189606	0.00175764
STRN3	226.525	162.83	142.403	45.1492	47.4056	26.9132	46.8691	27.4062	46.4358	27.446	-3.51324	-1.8128	0.000189646	0.00175764
GDF5	0	0	0	0	0.460249	9.53884	0.658803	8.8204	0.661793	3.65946	22.8446	4.51378	0.000190024	0.00176006
HSPB7	0	0	0	0	0	8.8575	7.90563	8.19037	7.39003	2.92757	287.483	8.16733	0.000192321	0.00178025
ARL4D	0	0	1.01716	2.61915	4.48743	19.759	9.97616	19.8459	10.4784	16.4676	5.54547	2.47131	0.000192872	0.00178425
ALX1	0	0	0	8.35635	9.4351	0	0	0	0	0	-145.511	-7.18498	0.000194917	0.00180122
CACNG6	0	0	0	6.61025	4.2573	0	0.0941147	0	0	0	-45.4188	-5.50522	0.000194946	0.00180122
RC3H1	85.4109	118.991	112.905	36.1693	30.7216	21.1217	24.6581	21.106	23.2731	25.6162	-3.2368	-1.69457	0.000195836	0.00180833
ANO2	0	1.56568	0	6.85969	6.78867	0	0	0	0	0	-129.613	-7.01806	0.000196104	0.00180969
GLS2	14.8541	4.69703	2.03432	0	0	0	0.0941147	0	0	0	-75.5268	-6.23892	0.000197891	0.00182507
IGF1R	37.1352	23.4851	13.2231	36.5434	45.9098	112.081	84.4209	121.28	86.364	113.443	3.12368	1.64325	0.000199417	0.001838
STIMATE-MUSTN1	19.8054	10.9597	13.2231	0.124722	1.26568	0	1.31761	1.26006	0.441196	0	-13.2674	-3.72981	0.000200186	0.00184397
SMIM10	0	0	0	2.8686	2.30124	6.47279	14.6819	5.98527	16.986	9.5146	5.88592	2.55727	0.000201819	0.00185787
UBE2W	85.4109	128.385	74.2528	38.6637	42.9182	10.2202	33.5989	8.50538	30.1116	11.7103	-3.81793	-1.93279	0.000202546	0.00186228
HERPUD1	40.8487	26.6165	25.429	76.7038	67.8867	138.313	180.794	126.321	202.729	116.737	3.09586	1.63034	0.000202457	0.00186228
PISD	147.303	115.86	140.368	29.9332	34.5187	22.1437	32.2813	24.2561	33.9721	23.4205	-3.37829	-1.75629	0.00020333	0.00186835
HLA-G	9.90271	4.69703	10.1716	0.249443	0.345187	0.340673	0	0.315014	0	0.731892	-19.3302	-4.27278	0.00020576	0.00188837
CSMD1	0	0	0	8.10691	9.20498	0	0	0	0	0	-142.011	-7.14986	0.00020567	0.00188837
C1QTNF9B	0	0	0	0.374165	0	6.13211	0.941147	5.35524	1.10299	5.12324	20.8856	4.38443	0.000206157	0.00189086
MOV10L1	1.23784	1.56568	0	18.9577	16.2238	1.02202	0.376459	0.630028	0.441196	2.19568	-9.0457	-3.17723	0.000207385	0.00190097
TBC1D8	16.0919	12.5254	8.13729	62.735	56.3805	10.2202	1.69406	7.24533	2.20598	10.6124	-5.07843	-2.34438	0.000207731	0.00190298
OGDHL	9.90271	3.13135	6.10297	0.498887	0.230124	0	0.0941147	0	0.110299	0.731892	-19.4109	-4.2788	0.000208949	0.00191297
ASB13	0	1.56568	0	2.36971	1.841	12.6049	9.03501	9.45043	10.5887	8.05081	5.19076	2.37595	0.000209079	0.00191299
BEND6	0	6.2627	6.10297	2.74388	4.02718	10.5609	19.8582	14.4907	19.9641	14.6378	4.59992	2.20161	0.000209441	0.00191515
ULK1	21.0433	26.6165	35.6006	13.5947	15.6485	131.5	21.9287	117.5	24.2658	128.081	3.81989	1.93353	0.000209788	0.00191715
CELF1	355.26	383.59	407.882	191.697	204.926	82.4428	122.067	87.5739	112.064	92.9503	-3.06922	-1.61787	0.000210628	0.00192366
FBN1	0	0	0	332.383	371.306	2019.85	1857.54	1848.19	1773.61	2548.08	14.2539	3.83329	0.000212142	0.00193631
PSMA3	250.043	295.913	304.131	146.174	137.729	51.7823	89.2207	68.3581	88.9009	56.3557	-3.15314	-1.65679	0.000214877	0.00196008
PELO	16.0919	21.9195	13.2231	28.3118	30.1463	72.904	79.2446	83.7938	81.18	65.1384	2.93882	1.55524	0.000217229	0.00198034
TSSK3	0	0	0	0.124722	0	5.11009	0.376459	5.35524	0.661793	8.78271	52.9583	5.72678	0.000217437	0.00198103
KLRG1	0	0	0	7.10913	7.01879	0	0.0941147	0.315014	0.220598	0.365946	-15.5882	-3.96239	0.00021774	0.00198259
PFKFB1	9.90271	6.2627	14.2403	0	0	0.681346	0	0	0.220598	0	-30.3742	-4.92477	0.000218736	0.00199046
LCORL	63.1298	70.4554	60.0125	15.3408	16.569	11.2422	10.2585	9.45043	14.8904	10.9784	-3.82083	-1.93389	0.000219561	0.00199676
FABP4	1.23784	0	0	14.2183	12.887	0	0.847032	0.630028	0.772092	0	-11.798	-3.56047	0.000220268	0.00200197
SEPTIN11	110.168	111.163	161.729	331.136	355.427	603.332	1393.27	638.534	1400.13	580.39	4.28833	2.10042	0.000221854	0.00201518
ZNF730	0	0	0	0.249443	0	3.06606	3.67047	0.945043	4.41196	1.46378	22.8045	4.51124	0.000224158	0.00203488
EXOC3L2	4.95136	9.39405	8.13729	0.374165	0.575311	0.681346	0	0	0.441196	0	-17.4037	-4.12132	0.000224542	0.00203713
RPS6KA6	0	0	0	7.85746	5.52299	14.6489	27.3874	14.4907	28.8983	16.8335	5.57186	2.47816	0.000225453	0.00204417
METTL17	1.23784	3.13135	2.03432	15.0913	20.1359	57.9144	28.3285	46.6221	27.685	56.7216	4.62571	2.20967	0.000225668	0.00204488
GSTM4	4.95136	0	3.05148	1.99555	1.38075	11.9236	6.21157	12.6006	7.50033	13.906	5.12457	2.35743	0.00022605	0.0020471
PHTF1	107.692	90.8092	63.064	63.9822	67.6566	28.2759	29.3638	25.2011	30.3322	18.2973	-2.83951	-1.50564	0.000227886	0.00206213
SIMC1	3.71352	1.56568	4.06864	7.4833	8.85979	22.8251	31.7167	24.5711	31.1043	27.8119	3.8616	1.9492	0.000227983	0.00206213
EPHB6	0	0	0	0.74833	0.690373	8.17615	3.10579	8.8204	2.64717	3.65946	8.5005	3.08755	0.000229154	0.00206899
TTLL11	0	0	0	8.73052	10.0104	16.3523	44.2339	21.421	38.8252	14.6378	6.12489	2.61468	0.000228903	0.00206899
ZNF154	0	0	0	2.74388	1.72593	8.17615	10.8232	8.50538	11.5814	10.2465	5.35709	2.42145	0.000229136	0.00206899
BEND7	0	0	0	16.0891	14.6129	0.340673	0.564688	0.945043	0.441196	0.731892	-10.6566	-3.41367	0.000230385	0.00207886
ASAP3	1.23784	1.56568	1.01716	5.98664	4.02718	34.7486	4.89396	20.7909	6.28704	28.5438	5.73565	2.51996	0.000231964	0.00209184
HOXA11	0	0	0	7.73274	8.85979	0	0	0	0	0	-136.771	-7.09562	0.000234919	0.00211722
CAPG	403.535	607.482	602.159	41.5323	34.8638	83.1242	52.516	81.5887	52.392	84.1676	-4.76696	-2.25307	0.000235147	0.00211801
ZBTB40	11.1406	12.5254	11.1888	36.0446	37.3952	123.324	34.446	122.541	30.994	107.222	3.69809	1.88678	0.000236962	0.00213181
GDF7	0	0	0	6.61025	9.66522	0.340673	0.282344	0	0.220598	0.365946	-14.0625	-3.81378	0.000236954	0.00213181
NAA11	4.95136	6.2627	12.2059	0	0.115062	0	0	0	0	0	-169.469	-7.40488	0.000238523	0.00214457
UBXN2B	8.66487	9.39405	5.08581	21.2027	23.1275	3.40673	0.564688	4.72521	1.10299	3.65946	-5.55882	-2.47478	0.000238991	0.00214749
NEDD9	60.6541	53.233	33.5663	102.895	99.6439	1.70336	26.5403	1.89009	29.2292	5.12324	-5.37262	-2.42563	0.000239632	0.00215196
OBSCN	0	0	0	2.24499	2.18618	14.3083	6.68214	10.0805	7.16943	13.1741	5.58972	2.48277	0.00023981	0.00215228
POMZP3	0	0	0	4.86414	2.64643	11.5829	13.3643	22.681	11.0299	19.3951	5.82474	2.54219	0.00024027	0.00215512
METTL7A	1.23784	4.69703	3.05148	1.62138	3.45187	22.8251	2.82344	19.5309	1.98538	51.5984	7.11758	2.83139	0.000241216	0.00216232
SYNGAP1	8.66487	4.69703	8.13729	15.4655	16.2238	56.5517	26.0698	54.1824	23.0525	57.4535	3.6476	1.86695	0.000242899	0.00217611
CPNE2	65.6055	51.6673	56.961	52.6325	47.0604	29.9792	12.0467	19.2159	13.1256	15.3697	-3.09475	-1.62982	0.000243977	0.00218446
DOCK7	77.9839	62.627	74.2528	60.2406	62.5938	180.216	268.886	192.159	280.27	129.911	3.15309	1.65677	0.000244285	0.00218462
CNBP	1737.93	1308.9	1302.98	257.425	252.216	160.457	253.263	163.492	266.703	174.556	-4.76354	-2.25203	0.000244228	0.00218462
gene:ENSG00000286239	23.5189	36.0105	18.3089	0.997773	0.690373	1.02202	2.44698	3.15014	0.441196	1.09784	-9.32025	-3.22037	0.000245459	0.00219382
DMRTA2	4.95136	7.82838	12.2059	0	0	0	0	0	0	0	-181.328	-7.50245	0.00024596	0.00219699
IL1A	0	0	0	10.4766	5.75311	0	0	0	0	0	-133.894	-7.06495	0.00024634	0.00219908
GREM2	0	0	0	0	0	6.13211	7.15272	7.56034	4.74285	7.31892	253.36	7.98505	0.000247716	0.00221005
ZNF717	3.71352	1.56568	3.05148	0.623608	0.690373	4.42875	7.81152	4.09518	6.50764	6.95298	6.34655	2.66597	0.000250253	0.00223136
BMP1	39.6108	40.7076	53.9095	54.0045	66.3909	227.91	91.1971	187.433	103.791	154.429	2.93325	1.5525	0.000252527	0.0022503
BMPR1B	0	0	0	0.623608	0.460249	4.42875	1.97641	5.04023	2.42658	9.5146	9.7644	3.28753	0.000252915	0.00225243
ITGA9	8.66487	7.82838	14.2403	0.124722	0.115062	0.681346	0.470574	0.315014	0.110299	0	-17.3678	-4.11834	0.000253324	0.00225301
EPS8L2	0	0	0	9.60357	8.85979	27.2538	13.8349	34.3365	12.3535	45.0114	6.08121	2.60436	0.000253429	0.00225301
FBXL8	0	0	0	1.49666	1.49581	12.2642	2.72933	9.76544	4.74285	9.14865	6.68907	2.7418	0.000253338	0.00225301
TTC13	85.4109	92.3748	80.3557	33.4254	33.7132	14.3083	18.5406	17.9558	16.5448	26.7141	-3.36221	-1.74941	0.000254455	0.00225812
DNAH8	0	0	0	5.48775	4.71755	0	0.0941147	0.315014	0.110299	0	-19.4633	-4.28268	0.000254446	0.00225812
ZMAT1	0	1.56568	1.01716	10.4766	12.3117	0.340673	1.31761	0.315014	0.441196	0.365946	-9.03968	-3.17627	0.000254441	0.00225812
PCDH9	58.1784	51.6673	37.635	11.4744	8.74473	123.664	125.361	103.325	127.285	86.7292	3.51533	1.81366	0.000255746	0.00226824
MID1	7.42703	10.9597	6.10297	40.5345	45.6797	86.8716	75.6682	91.9841	78.4225	83.8016	3.54248	1.82476	0.000258666	0.00229278
DMRTA1	0	0	0	13.0958	16.4539	1.36269	0	0.315014	0.220598	0.365946	-13.9479	-3.80198	0.000258876	0.00229329
ASPH	61.8919	59.4957	48.8237	235.599	282.017	425.5	801.293	425.899	769.225	428.523	4.10601	2.03774	0.000261489	0.00231507
NBEAL2	56.9406	73.5867	84.4244	61.8619	68.462	27.9352	15.4348	33.0765	15.0007	25.2503	-3.01165	-1.59055	0.000262495	0.00232262
CNOT6	174.535	264.599	212.587	54.1292	59.0269	42.9248	57.9747	44.732	53.0538	31.8373	-3.2775	-1.7126	0.000262928	0.00232508
PLAAT3	1.23784	0	0	46.6459	43.0333	2.04404	1.03526	1.89009	1.43389	3.65946	-9.24213	-3.20823	0.000264382	0.00233657
TSPOAP1	0	0	0	0	0	10.9015	2.5411	9.13541	3.63986	8.41676	266.928	8.0603	0.000264579	0.00233694
P2RX5	0	0	0	0.374165	0	3.06606	3.67047	2.2051	2.86777	1.09784	16.1235	4.01109	0.000269576	0.00237968
TEAD1	68.0811	54.7986	63.064	105.764	121.506	176.469	379.188	183.023	388.473	189.194	3.1339	1.64796	0.000270099	0.00238289
KITLG	56.9406	46.9703	50.8581	119.359	130.596	189.073	375.518	203.499	396.855	188.828	3.28258	1.71483	0.000271345	0.00239248
GCKR	0	0	0	4.36526	5.1778	0	0.0941147	0	0	0	-40.9415	-5.35549	0.00027225	0.00239906
LTBP4	80.4595	51.6673	56.961	11.1002	16.1087	204.744	80.6563	224.605	87.1361	184.437	3.68852	1.88304	0.000273517	0.00240881
EEPD1	2.47568	3.13135	0	0	0.345187	13.6269	1.97641	12.2856	1.87508	10.2465	10.4683	3.38795	0.000275333	0.00242197
BCL2	19.8054	17.2224	14.2403	0.873052	0.460249	0.681346	1.12938	1.57507	1.32359	0.365946	-9.42178	-3.236	0.000275329	0.00242197
RNF19A	142.351	104.9	105.785	73.5858	73.6398	24.8691	41.3164	28.9813	45.1123	25.9822	-2.90863	-1.54034	0.000275781	0.00242448
TBL2	1.23784	4.69703	7.12013	24.5702	29.3409	50.4196	74.3506	63.9479	73.3488	50.1346	4.27813	2.09698	0.000276065	0.00242556
ZNF365	27.2325	34.4449	40.6864	0.124722	0.460249	1.36269	2.07052	1.89009	2.75747	1.82973	-10.0131	-3.32381	0.000277832	0.00243824
gene:ENSG00000264813	2.47568	14.0911	8.13729	0	0	0	0	0	0	0	-177.759	-7.47378	0.000277708	0.00243824
MSL2	110.168	118.991	102.733	21.2027	21.6317	19.759	20.1405	18.5858	21.398	16.4676	-3.81259	-1.93077	0.000278032	0.00243858
TBKBP1	94.0758	90.8092	86.4587	12.2227	13.002	19.4184	7.90563	14.1756	9.48571	17.5654	-4.2808	-2.09788	0.000280252	0.00245661
SLC12A8	0	0	1.01716	0.374165	0.345187	5.11009	1.59995	5.35524	2.97807	4.02541	9.15177	3.19405	0.000281813	0.00246886
RSPO3	1.23784	0	0	10.4766	7.47904	0	0.564688	0.315014	0.551495	0.365946	-10.5409	-3.39792	0.000282667	0.00247394
CD4	0	0	0	0	0	5.79144	7.15272	5.67026	7.16943	2.92757	247.756	7.95278	0.000282722	0.00247394
RAB28	71.7947	62.627	83.4072	8.60579	11.161	10.5609	10.5408	8.19037	11.2505	13.1741	-4.33097	-2.11469	0.000283324	0.00247777
SYNC	6.18919	3.13135	6.10297	56.3742	47.2906	159.435	87.2443	145.852	85.4817	71.3595	4.43599	2.14926	0.000285223	0.00249292
ABCA9	0	0	0	10.8508	7.24892	0.340673	0.0941147	0.630028	0	0.365946	-14.6068	-3.86857	0.000285582	0.00249461
FAH	0	0	0	12.098	13.002	34.0673	32.6578	27.0912	28.2365	32.5692	5.38301	2.42841	0.00028639	0.00250022
FBXO32	0	1.56568	1.01716	8.97996	5.98323	58.5957	0.941147	51.9773	2.75747	50.1346	8.52385	3.0915	0.000287421	0.00250777
HOXC6	2.47568	0	0	2.99332	4.02718	0	0	0	0	0	-113.637	-6.82829	0.000288431	0.00251401
POU4F1	0	0	0	7.35858	7.5941	0	0	0	0	0	-124.892	-6.96453	0.000288471	0.00251401
FRMD4A	211.67	212.932	199.364	201.924	233.231	38.1554	102.961	43.787	102.247	49.4027	-3.12294	-1.64291	0.000290657	0.00253159
LPIN3	18.5676	56.3643	70.1841	2.74388	1.841	3.06606	3.67047	2.52011	5.73554	6.58703	-6.77751	-2.76075	0.000293412	0.00255411
SHISA3	0	0	0	8.35635	6.55854	0	0	0	0	0	-124.565	-6.96076	0.000294705	0.00256388
CGREF1	0	0	0	0.623608	0.920498	3.7474	4.51751	5.98527	5.29435	4.39135	6.90654	2.78796	0.000296444	0.00257752
DBNDD1	0	0	0	36.294	44.6441	1.70336	1.22349	2.52011	0.99269	1.82973	-9.94371	-3.31378	0.000297046	0.00258127
TATDN2	0	4.69703	1.01716	29.0601	21.8618	68.4753	50.2572	62.6878	49.5242	65.8703	4.91344	2.29673	0.000298063	0.00258711
FANCA	3.71352	3.13135	3.05148	13.7194	17.7196	48.7162	30.6814	46.6221	29.6704	35.1308	3.8538	1.94628	0.000297933	0.00258711
COBLL1	17.3297	12.5254	22.3775	72.8374	65.5854	6.47279	13.3643	5.35524	15.2212	8.41676	-3.96815	-1.98847	0.000300238	0.00260298
RCAN1	7.42703	7.82838	5.08581	44.7751	44.6441	56.8924	167.901	57.9626	182.986	31.1054	4.37605	2.12963	0.000300114	0.00260298
FUT1	0	0	0	6.11136	8.62966	0	0	0	0	0	-123.289	-6.9459	0.000301128	0.0026092
TET3	149.779	131.517	147.488	23.3229	23.2426	32.0233	19.67	29.6113	17.5375	30.7395	-3.63757	-1.86297	0.00030287	0.00262166
GAS6	0	0	0	58.3697	63.8595	119.917	286.015	116.87	291.41	121.494	7.55381	2.91721	0.000302915	0.00262166
ITSN2	198.054	170.659	199.364	132.33	132.552	43.2655	68.7978	42.8419	69.5986	61.4789	-2.84951	-1.51071	0.000307235	0.00265752
ITGA10	1.23784	1.56568	3.05148	35.2962	29.1107	78.3548	52.9866	64.8929	53.8259	106.124	4.78241	2.25774	0.000308828	0.00266976
HERC6	4.95136	4.69703	5.08581	5.98664	5.29286	2.38471	0.752918	1.26006	0.551495	1.82973	-5.32245	-2.41209	0.000309344	0.00267256
SEMA3E	4.95136	6.2627	5.08581	0	0.115062	0	0.0941147	0	0	0	-53.7524	-5.74826	0.000309506	0.00267256
MACF1	2054.81	1559.41	1467.76	1043.67	1247.85	394.499	454.856	363.526	424.21	354.968	-3.68959	-1.88346	0.000309774	0.00267333
PGAP3	0	3.13135	6.10297	2.61915	1.61087	14.6489	6.96449	15.1207	8.16212	15.0038	4.8048	2.26448	0.000312157	0.00269145
TGM2	79.2217	31.3135	37.635	611.136	693.825	31.0012	91.1971	32.1314	90.9966	13.906	-5.60663	-2.48713	0.000312231	0.00269145
INTS2	89.1244	115.86	112.905	26.0668	24.9685	19.4184	23.4346	17.6408	21.2877	19.7611	-3.55136	-1.82837	0.000312846	0.0026952
TMEM40	3.71352	6.2627	13.2231	0	0	0	0	0	0	0	-168.505	-7.39665	0.000314194	0.00270527
EGR3	51.9892	17.2224	37.635	0.374165	0.230124	1.02202	1.88229	0.315014	4.96345	0.731892	-11.4414	-3.5162	0.000315124	0.00271172
H6PD	11.1406	4.69703	7.12013	50.8864	63.8595	109.015	98.8204	129.786	108.424	122.592	3.96342	1.98674	0.000319884	0.00275111
ADRA1B	0	0	0	0	0.345187	2.38471	3.38813	1.26006	2.86777	2.19568	15.3252	3.93784	0.000322105	0.00276863
RGL3	4.95136	6.2627	10.1716	0.498887	0.115062	0.681346	0.0941147	0	0.330897	0	-16.6915	-4.06104	0.000324428	0.002787
RANBP17	14.8541	12.5254	7.12013	7.4833	6.21336	27.2538	26.258	22.681	27.4644	27.8119	3.57057	1.83615	0.000325276	0.00279269
ADGRE5	1.23784	3.13135	3.05148	4.36526	4.37236	13.2862	18.8229	11.6555	19.0817	17.1995	4.08991	2.03207	0.000325685	0.00279462
P2RX7	4.95136	7.82838	10.1716	1.24722	1.03556	0.681346	0.0941147	0.945043	0.330897	0.365946	-9.86395	-3.30217	0.000328774	0.00281951
HPRT1	221.573	183.184	172.917	54.6281	50.8575	20.4404	64.2803	22.366	65.8484	19.0292	-3.51552	-1.81374	0.000331298	0.00283954
GJD3	0	0	0	2.36971	1.841	10.5609	6.21157	9.76544	6.61793	13.54	5.24772	2.39169	0.000331652	0.00284095
TMEM252	8.66487	6.2627	7.12013	0	0	0	0	0	0	0	-158.453	-7.30791	0.000332217	0.00284417
RALGAPA2	21.0433	45.4046	39.6693	40.784	47.4056	12.2642	10.8232	16.3807	11.2505	16.8335	-3.09745	-1.63108	0.000332628	0.00284607
C2CD4B	0	0	0	6.23608	7.36398	0	0	0	0	0	-115.142	-6.84727	0.000334467	0.00285897
C3	21.0433	4.69703	6.10297	0.124722	0.345187	0.340673	0.564688	0.315014	0.551495	0	-15.0108	-3.90793	0.000334516	0.00285897
YWHAH	937.044	889.304	871.707	235.1	249.455	162.16	194.253	174.518	182.655	121.494	-3.7998	-1.92592	0.000335646	0.002867
CAPZA2	335.454	308.438	306.166	267.403	246.808	62.3431	138.537	64.5779	145.264	70.6276	-3.01623	-1.59275	0.00033734	0.00287661
UBTD1	68.0811	73.5867	77.3042	23.8218	27.845	16.0116	13.8349	18.2708	10.1475	20.8589	-3.34669	-1.74274	0.000337004	0.00287661
CCR7	0	3.13135	0	0.249443	0	6.47279	1.69406	4.09518	1.87508	3.65946	12.7225	3.66931	0.000337345	0.00287661
MLIP	0	0	0	5.61247	8.28448	0	0	0	0	0	-117.181	-6.87259	0.000338962	0.00288877
NOP58	517.417	504.147	461.791	110.503	105.512	44.6282	147.195	46.3071	147.911	31.1054	-4.055	-2.0197	0.000339546	0.00289079
RGMA	16.0919	10.9597	10.1716	0	0	0.340673	0.0941147	0.630028	0.110299	0.731892	-19.1554	-4.25968	0.000339585	0.00289079
GLB1L	7.42703	7.82838	5.08581	11.2249	10.9309	3.06606	2.07052	4.09518	2.64717	1.82973	-4.05304	-2.01901	0.000340369	0.00289583
MALT1	12.3784	15.6568	10.1716	12.3474	13.8075	29.6385	53.9277	34.3365	56.8039	31.1054	3.24702	1.69911	0.000341191	0.00290118
VAT1L	0	0	0	0	0	4.08807	6.96449	5.35524	5.51495	5.12324	231.045	7.85203	0.000343052	0.00291536
ICOSLG	0	0	0	6.3608	4.2573	0	0.282344	0	0.110299	0	-18.549	-4.21327	0.0003438	0.00292007
TNRC6C	134.924	162.83	162.746	10.6013	9.32004	25.5505	12.4231	24.8861	12.3535	29.2757	-4.57543	-2.19391	0.000344631	0.00292547
SLC43A1	0	0	1.01716	5.23831	4.60249	24.1878	9.22324	19.2159	9.04451	23.0546	5.2688	2.39747	0.00034628	0.00293782
PITPNM2	127.497	118.991	93.5788	19.5813	17.4895	22.4844	10.2585	26.4612	8.27242	19.3951	-4.30925	-2.10744	0.00034761	0.00294744
PRKD2	91.6001	106.466	94.596	49.2651	52.3533	28.9572	12.7055	30.5564	15.2212	40.986	-3.05868	-1.61291	0.000349944	0.00296556
PCF11	178.249	200.406	164.78	121.728	119.435	51.1009	59.104	50.4023	58.0172	61.113	-2.7081	-1.43728	0.000350249	0.00296647
TTC3	30.946	51.6673	48.8237	245.203	263.838	532.812	641.956	426.844	657.602	442.063	4.17787	2.06277	0.000350987	0.00297104
NCK1	85.4109	89.2435	90.5273	47.3942	42.6881	16.693	29.3638	16.3807	29.7807	18.6632	-3.06905	-1.61779	0.00035266	0.00298353
MTRNR2L6	6.18919	3.13135	7.12013	0.124722	0.115062	0	0.282344	0	0	0	-28.5246	-4.83413	0.000354418	0.00299672
MAGED2	56.9406	104.9	93.5788	138.316	133.932	382.576	242.628	381.797	250.599	371.435	3.02806	1.59839	0.00035534	0.00300282
TRIM3	206.719	128.385	142.403	25.3185	26.6944	34.408	14.3054	34.3365	16.1036	38.0584	-3.84022	-1.94119	0.000356721	0.0030128
GFPT2	12.3784	10.9597	8.13729	53.5056	47.0604	78.3548	113.126	90.4091	128.167	66.6022	3.43763	1.78141	0.000357743	0.00301956
MPP3	2.47568	0	1.01716	3.11804	1.95606	9.19817	11.482	10.3955	12.2432	6.58703	4.51873	2.17592	0.000357923	0.00301956
PHOSPHO1	4.95136	7.82838	4.06864	0.498887	0.805435	0.340673	0.188229	0	0.330897	0	-13.2873	-3.73198	0.000360748	0.00304169
RTN4RL2	0	0	0	0.249443	0	4.76942	0.376459	6.93031	0.551495	5.12324	28.3729	4.82644	0.000360998	0.00304209
PCNT	6.18919	6.2627	4.06864	45.5234	54.5395	152.962	57.5982	131.676	53.6053	131.741	4.35475	2.12259	0.000363568	0.00306203
PLXNB1	4.95136	3.13135	11.1888	18.833	22.6673	67.4532	22.3052	62.6878	22.2804	86.7292	3.98118	1.9932	0.000364705	0.00306989
ARHGEF9	17.3297	10.9597	20.3432	11.9733	11.161	38.1554	39.2458	32.7615	40.1488	32.5692	3.07574	1.62093	0.000368604	0.00310098
AUTS2	2.47568	3.13135	5.08581	0	0.115062	8.17615	17.223	12.6006	13.4565	9.88054	7.43981	2.89527	0.000369831	0.00310956
HBEGF	39.6108	12.5254	14.2403	110.129	113.106	3.7474	23.7169	1.89009	20.5156	1.09784	-5.64956	-2.49814	0.000370196	0.00311088
TMEM171	3.71352	1.56568	1.01716	13.3452	14.728	2.38471	0.847032	1.57507	0.661793	1.09784	-6.16301	-2.62363	0.000373283	0.00313508
YAP1	87.8866	97.0719	114.939	39.412	38.4308	161.138	309.261	167.903	309.83	220.3	3.15948	1.65969	0.000373877	0.00313832
PLPP7	1.23784	0	0	0	0	4.76942	1.59995	2.83513	1.43389	3.65946	32.6304	5.02815	0.000374447	0.00314134
COL24A1	0	0	0	0.249443	0	2.38471	3.29401	0.315014	3.63986	3.65946	21.6531	4.4365	0.000375087	0.00314496
SMIM43	0	0	0	0	0	5.79144	4.04693	3.46516	4.41196	12.4422	232.269	7.85965	0.000376439	0.00315454
DNM3	13.6162	10.9597	8.13729	0.374165	1.61087	0.681346	0.658803	1.26006	0.441196	0.731892	-8.37619	-3.06629	0.000378452	0.00316904
TTN	0	1.56568	2.03432	12.7216	13.002	1.36269	1.12938	0.630028	0.220598	1.09784	-7.43885	-2.89508	0.000378591	0.00316904
DAPP1	3.71352	9.39405	3.05148	0.124722	0	0	0	0	0.110299	0	-50.8208	-5.66735	0.000379458	0.00317453
TSPAN10	0	0	0	0	0.115062	4.08807	1.31761	3.15014	1.43389	4.39135	34.8311	5.1223	0.000383813	0.00320918
CSNK2A2	147.303	139.345	134.265	35.6704	35.8994	29.9792	25.1286	34.9666	24.4864	39.8881	-3.14972	-1.65522	0.000385677	0.00322298
HTR7	0	0	0	0.74833	0.460249	3.7474	3.8587	3.15014	4.74285	3.65946	7.4024	2.88799	0.000390474	0.00325891
NCAM1	4.95136	6.2627	12.2059	0	0	0.681346	0.0941147	0	0	0	-27.7561	-4.79473	0.000390623	0.00325891
ZIC2	6.18919	6.2627	7.12013	0	0.115062	0	0	0	0	0	-138.93	-7.11822	0.000390628	0.00325891
PARP12	17.3297	31.3135	17.2917	27.6882	29.4559	6.13211	9.03501	10.3955	7.61062	4.39135	-3.35361	-1.74572	0.000391652	0.00326565
FOXC1	7.42703	12.5254	7.12013	11.3497	15.7635	2.04404	3.76459	3.46516	3.19867	2.19568	-3.86988	-1.95229	0.000392998	0.00327506
DEPP1	0	1.56568	2.03432	141.933	153.723	8.51682	5.92923	7.24533	6.17674	9.14865	-8.12316	-3.02204	0.000394293	0.00328403
gene:ENSG00000283149	12.3784	17.2224	8.13729	2.12027	0	0	1.59995	0.630028	0	0	-15.2479	-3.93054	0.000394942	0.00328762
EXO1	4.95136	1.56568	3.05148	8.35635	10.2405	35.43	30.9637	32.7615	24.9276	17.9314	3.83247	1.93828	0.000398893	0.00331866
PTER	43.3244	57.93	70.1841	0.249443	0.690373	2.72538	4.61162	4.09518	4.52226	4.7573	-8.17733	-3.03163	0.000399191	0.00331931
MYOZ2	0	0	0	3.11804	2.87655	0.340673	0.0941147	0.315014	0.110299	0	-15.755	-3.97773	0.000401679	0.00333689
MTUS2	3.71352	4.69703	10.1716	0	0.115062	0	0.282344	0	0.110299	0	-26.531	-4.72961	0.000401749	0.00333689
DVL3	30.946	61.0613	53.9095	44.1515	48.096	146.489	94.1147	140.496	89.1215	161.748	2.66157	1.41228	0.000402875	0.00334255
C21orf91	3.71352	7.82838	2.03432	4.98887	3.68199	12.2642	25.8815	11.3405	24.0452	11.3443	4.03464	2.01244	0.000402679	0.00334255
GALNT7	38.373	56.3643	63.064	236.846	226.212	35.43	37.0812	34.0215	34.6339	42.8157	-3.41439	-1.77163	0.000403254	0.00334386
TMEM26	0	0	0	0.74833	0.230124	9.53884	0.752918	7.56034	0.220598	9.88054	15.3575	3.94087	0.000404143	0.00334938
COP1	191.865	194.144	207.501	43.7773	47.6357	51.4416	42.5398	45.6771	46.2152	28.9097	-3.15529	-1.65777	0.000404495	0.00335045
LGMN	12.3784	34.4449	52.8924	89.0513	93.2004	22.4844	14.5878	17.6408	15.9933	11.7103	-3.5048	-1.80933	0.000405833	0.00335968
HELLS	174.535	140.911	114.939	24.9443	28.0752	29.9792	34.7283	22.366	32.9794	21.2249	-3.37063	-1.75302	0.000407276	0.00336977
CLDN4	0	0	0	0.249443	0	3.7474	0.752918	5.04023	1.65448	3.29351	21.8039	4.44651	0.00041086	0.00339756
ZKSCAN7	0	0	0	0.74833	1.61087	9.87951	5.17631	6.6153	5.73554	5.12324	5.94229	2.57102	0.000412011	0.0034052
OSBPL10	17.3297	10.9597	12.2059	58.1203	55.575	10.9015	6.3998	12.9156	4.19136	6.22108	-3.97587	-1.99127	0.000415829	0.00343299
ADGRG6	0	0	0	356.454	363.712	4.42875	21.4582	5.67026	20.295	7.31892	-12.1417	-3.60189	0.000415755	0.00343299
ADSS1	0	0	0	0.249443	0.575311	4.76942	2.5411	3.15014	3.19867	4.7573	8.42373	3.07446	0.00041902	0.00345744
SPEG	9.90271	10.9597	17.2917	0	0.115062	81.4208	26.9168	57.9626	29.7807	62.5768	7.03124	2.81378	0.000419771	0.00345993
CASD1	74.2703	101.769	78.3214	12.2227	13.8075	8.51682	16.5642	6.30028	19.4126	15.3697	-4.13726	-2.04868	0.000420328	0.00345993
MAP6	25.9946	21.9195	15.2574	1.24722	1.26568	2.38471	1.59995	2.2051	1.43389	1.46378	-6.84014	-2.77403	0.000419831	0.00345993
TGFB1I1	39.6108	21.9195	33.5663	45.3987	48.9014	112.763	89.2207	150.262	88.9009	125.154	2.81197	1.49158	0.000420257	0.00345993
CSDC2	0	0	0	0	0	10.2202	1.69406	7.24533	1.65448	10.2465	241.057	7.91323	0.000420473	0.00345993
NQO2	1.23784	6.2627	2.03432	6.3608	4.48743	25.8911	12.0467	25.5161	10.3681	22.3227	4.1383	2.04904	0.000421929	0.00347001
SLITRK6	0	0	0	0	0	17.0336	0	10.0805	0.551495	13.54	326.379	8.3504	0.000423212	0.00347866
NDOR1	1.23784	3.13135	2.03432	7.60802	10.9309	38.1554	22.3993	22.051	19.0817	28.9097	4.00131	2.00047	0.00042621	0.00350139
DAGLA	13.6162	23.4851	23.3947	10.7261	12.887	5.45077	5.08219	2.2051	3.41927	2.19568	-3.99031	-1.9965	0.000429221	0.0035242
TRPA1	0	0	0	0	0	4.76942	6.02334	2.83513	6.39734	4.39135	211.028	7.72129	0.000431305	0.00353938
PLD1	16.0919	20.3538	19.3261	89.3007	96.8824	15.3303	7.81152	19.2159	8.38272	11.7103	-3.99128	-1.99685	0.000431829	0.00353982
PHLDA1	84.173	31.3135	29.4977	156.775	142.677	168.974	379.565	225.865	434.026	372.533	3.51184	1.81223	0.000431657	0.00353982
COL23A1	13.6162	3.13135	4.06864	0	0	0	0	0	0	0	-149.941	-7.22825	0.00043531	0.00356253
ALPK3	0	0	0	19.706	15.1882	0.681346	0.282344	1.26006	0.441196	1.09784	-9.90441	-3.30807	0.000435125	0.00356253
DUSP9	9.90271	12.5254	15.2574	0	0	0.681346	0.282344	0.630028	0	0.365946	-18.5739	-4.2152	0.000435019	0.00356253
NFIA	25.9946	43.8389	41.7036	16.2138	22.5522	7.4948	8.84678	6.93031	10.1475	8.05081	-3.29746	-1.72135	0.000437161	0.00357573
SUGCT	0	1.56568	1.01716	1.62138	3.22174	4.76942	12.6114	8.8204	13.0153	9.5146	4.83533	2.27362	0.000437809	0.00357909
FBXW7	99.0271	72.0211	69.167	34.5479	34.1735	20.4404	20.517	16.0657	18.9714	20.127	-3.09206	-1.62857	0.000438449	0.00358237
MBD3	12.3784	15.6568	16.2746	36.5434	38.5458	92.3224	54.7748	102.065	50.6272	88.5589	3.02355	1.59624	0.000440434	0.00359664
PRSS23	123.784	50.1016	53.9095	1476.21	1532.17	130.137	112.185	143.331	106.659	66.6022	-5.79491	-2.53479	0.000443701	0.00362135
BTBD3	138.638	137.779	150.54	35.5457	35.6693	27.2538	42.1634	23.9411	39.1561	20.127	-3.2062	-1.68087	0.000448485	0.00365841
AGAP9	0	0	0	8.60579	5.63805	20.0997	13.4584	29.6113	11.6917	22.6887	5.17584	2.37179	0.000449274	0.00366286
PLPPR3	0	1.56568	0	0.374165	0.230124	2.04404	2.91756	2.83513	3.86046	2.19568	9.06517	3.18033	0.000451882	0.00368213
SCAMP5	9.90271	0	3.05148	5.86192	6.44348	2.38471	0.376459	0.945043	0.551495	1.09784	-6.21992	-2.6369	0.000452436	0.00368465
MYO5C	0	0	0	4.48998	6.0983	0	0.188229	0.315014	0.220598	0	-14.0895	-3.81655	0.000455665	0.00370894
VSIG1	0	0	0	7.10913	5.75311	0	0.376459	0	0.220598	0.365946	-12.7487	-3.67228	0.0004574	0.00372105
GAS2	3.71352	1.56568	5.08581	2.61915	1.49581	0	0	0	0	0	-88.3409	-6.46501	0.000458893	0.00373117
ZBTB18	54.4649	53.233	52.8924	27.1893	29.3409	10.9015	14.5878	14.8057	13.3462	14.6378	-2.94881	-1.56013	0.000460212	0.00373857
CASP12	1.23784	0	2.03432	2.49443	2.64643	0	0	0	0	0	-90.4978	-6.49981	0.000460548	0.00373857
CHST11	14.8541	6.2627	10.1716	31.6793	37.1651	6.13211	6.96449	4.4102	5.95614	2.92757	-3.98493	-1.99455	0.000460543	0.00373857
PGD	254.995	159.699	236.999	408.089	411.002	129.456	75.48	113.405	79.4152	105.027	-2.95675	-1.56401	0.000464314	0.00376507
MN1	28.4703	28.1822	28.4805	6.85969	6.55854	5.45077	1.88229	5.98527	2.42658	5.12324	-4.61311	-2.20574	0.000464133	0.00376507
AFDN	331.741	311.569	321.423	128.962	131.861	98.7951	75.0094	92.2992	69.5986	78.6784	-2.93457	-1.55315	0.000470525	0.00381338
KCTD4	1.23784	6.2627	5.08581	0.74833	1.841	0	0	0	0	0	-91.5356	-6.51626	0.000472421	0.00382669
C2CD4A	0	0	0	1.99555	2.64643	0	0	0.315014	0	0	-33.2816	-5.05665	0.00047483	0.00384413
IDH2	0	1.56568	0	34.9221	39.0061	118.213	57.9747	109.94	55.2598	96.9757	5.62747	2.49249	0.000475249	0.00384545
COL11A1	0	0	0	0	0.115062	3.06606	1.97641	3.15014	1.98538	2.92757	30.204	4.91667	0.000476365	0.00385034
DDIT4L	0	0	0	8.73052	9.20498	0.340673	0.376459	0.315014	0.110299	0.731892	-10.8909	-3.44505	0.000476297	0.00385034
TBC1D19	74.2703	92.3748	86.4587	9.97773	10.3556	11.9236	17.223	11.0255	15.2212	9.14865	-4.13998	-2.04962	0.000476831	0.00385204
PLXNA3	11.1406	7.82838	16.2746	83.813	87.1021	189.073	123.573	187.118	132.138	171.995	3.79302	1.92335	0.000477437	0.00385486
CHST1	18.5676	21.9195	23.3947	3.86637	2.41631	3.7474	0.941147	3.46516	0.441196	2.92757	-6.03844	-2.59418	0.000479759	0.00387065
TENT4B	110.168	118.991	116.974	25.8174	29.9162	18.737	32.9401	19.5309	32.2073	17.1995	-3.25859	-1.70425	0.000479907	0.00387065
LHX8	1.23784	10.9597	7.12013	0.124722	0	0	0	0	0	0	-136.889	-7.09686	0.000483208	0.00389406
CDK8	120.07	129.951	114.939	18.9577	16.7991	19.759	26.4462	16.3807	27.0232	17.5654	-3.67608	-1.87817	0.000483327	0.00389406
PAX8	0	0	0	0.374165	0.345187	3.06606	3.48224	2.52011	2.97807	1.82973	8.96514	3.16433	0.000484649	0.00390207
PDS5B	154.73	208.235	157.66	58.6192	55.8052	38.8367	48.8455	45.047	46.7667	41.7179	-2.82087	-1.49614	0.0004851	0.00390207
CDC34	174.535	184.75	198.346	42.2806	36.4747	41.2214	26.0698	48.5122	29.7807	44.2795	-3.3268	-1.73413	0.000485016	0.00390207
FGFRL1	14.8541	7.82838	7.12013	21.4521	28.4204	79.3768	40.6576	77.1785	37.7222	59.6492	3.381	1.75745	0.000486334	0.00390782
FAM171A1	112.643	118.991	109.853	144.303	148.085	41.5621	62.398	42.5269	63.5322	34.033	-2.59247	-1.37433	0.000486155	0.00390782
P3H1	27.2325	14.0911	21.3604	98.9043	106.663	225.866	162.913	227.755	157.066	203.466	3.54852	1.82722	0.000489215	0.00392887
NPAS1	0	0	0	0.498887	0.460249	2.38471	4.61162	2.52011	3.52956	2.19568	7.87199	2.97673	0.000489814	0.00393158
SLC52A2	1.23784	1.56568	1.01716	27.5635	26.5794	79.0361	46.9632	73.7133	47.0976	51.2324	4.80948	2.26588	0.000492364	0.00394994
KANK1	38.373	42.2732	41.7036	95.2873	111.15	8.51682	30.7755	17.0108	28.3468	6.95298	-3.59415	-1.84565	0.000493176	0.00395224
CD177	0	0	0	5.48775	6.32842	0	0.188229	0	0.330897	0.365946	-13.116	-3.71326	0.00049308	0.00395224
TIMP4	0	0	0	0	0	5.11009	4.04693	5.04023	6.72823	3.29351	197.735	7.62743	0.000496059	0.00397322
PPM1G	502.563	394.55	339.732	153.657	153.263	76.3107	128.278	86.6289	125.961	75.3849	-3.10984	-1.63684	0.000496633	0.00397571
MYH14	6.18919	4.69703	5.08581	0.623608	0	0	0	0	0	0	-113.495	-6.82648	0.000497881	0.00398358
WSCD1	1.23784	0	3.05148	23.1982	26.9246	2.38471	0.941147	2.52011	1.65448	1.09784	-6.73515	-2.75171	0.000499996	0.00399838
CAPN3	0	0	0	1.24722	1.49581	7.83548	6.30568	5.35524	6.61793	6.58703	5.31308	2.40955	0.000501744	0.00401022
TMEM120A	71.7947	87.6778	73.2356	18.5835	17.1443	17.3743	12.0467	17.3258	12.0226	15.3697	-3.53896	-1.82332	0.000506105	0.00404293
TXNDC9	99.0271	100.203	87.4759	78.0758	76.6314	17.715	45.8339	28.6663	48.6418	18.2973	-2.70793	-1.43719	0.000507861	0.0040548
KCNJ6	0	0	0	0.374165	0	0.681346	7.62329	1.26006	7.05913	0.365946	21.2178	4.4072	0.00051001	0.0040698
MEST	54.4649	129.951	121.042	0.374165	0.345187	12.9456	3.76459	12.9156	3.41927	3.29351	-8.3875	-3.06824	0.000512715	0.00408921
PDK1	19.8054	15.6568	15.2574	19.2071	14.6129	25.5505	101.55	25.5161	107.983	42.0838	3.59601	1.8464	0.000515092	0.00410599
CAMK4	17.3297	14.0911	10.1716	5.48775	5.63805	3.40673	2.35287	1.57507	1.54418	1.09784	-4.45809	-2.15643	0.000515818	0.00410961
SRC	142.351	150.305	107.819	35.6704	35.5542	41.2214	16.8465	32.4465	18.089	39.5222	-3.1574	-1.65874	0.000517688	0.00412232
MZT2B	0	1.56568	1.01716	36.7929	35.209	93.685	64.3745	91.6691	62.9807	76.1168	5.00952	2.32467	0.00051879	0.00412891
CXCL16	0	0	0	7.60802	7.93929	0	0.376459	0.315014	0.330897	0.365946	-11.474	-3.52029	0.000522507	0.00415545
DDX39A	144.827	236.417	185.123	48.8909	53.3889	49.3976	35.4812	56.7026	33.7515	42.0838	-3.0452	-1.60654	0.000522677	0.00415545
MT1M	0	0	0	17.5858	24.048	0.681346	0.376459	0	0.551495	2.19568	-11.2965	-3.4978	0.000524412	0.00416704
PDGFA	42.0865	26.6165	26.4462	38.0401	32.6777	11.5829	9.88204	17.0108	10.3681	9.14865	-3.04757	-1.60766	0.00052539	0.00417261
LIMK2	101.503	92.3748	80.3557	44.6504	52.0081	30.3199	24.5639	27.4062	21.9495	28.1778	-2.70867	-1.43759	0.000529799	0.0042054
SPOP	178.249	178.487	205.467	50.2628	48.3261	44.9688	46.6809	40.9518	43.1269	42.0838	-2.99654	-1.5833	0.000534209	0.00423817
EFEMP2	0	1.56568	0	63.608	67.4264	175.106	145.69	171.368	148.352	165.042	5.98238	2.58072	0.000535865	0.00424907
AGBL3	2.47568	4.69703	4.06864	0.249443	0.690373	0	0	0	0	0.365946	-28.6302	-4.83947	0.000537078	0.00425644
HTRA2	81.6974	56.3643	68.1498	16.2138	13.9225	16.0116	12.0467	11.0255	12.905	13.906	-3.4951	-1.80533	0.000538507	0.00426451
ZNF141	0	0	0	3.49221	3.22174	10.2202	14.6819	13.5456	16.8757	10.2465	4.86936	2.28373	0.000538663	0.00426451
TTC31	0	0	0	11.8486	10.5857	33.3859	17.8818	35.2816	15.6624	40.62	5.53275	2.468	0.000540824	0.00427937
FBP2	1.23784	9.39405	9.15445	0	0	0	0	0	0	0	-141.757	-7.14728	0.000542583	0.00429103
BAIAP2L1	0	0	0	1.24722	1.49581	3.06606	10.8232	3.46516	8.93421	4.7573	6.10897	2.61093	0.000542954	0.0042914
COL4A2	721.66	438.389	497.392	997.274	1221.73	3894.57	2133.67	3765.36	2291.13	3011	3.88394	1.95752	0.0005432	0.0042914
UPP1	68.0811	57.93	68.1498	28.1871	32.3325	15.3303	16.376	20.7909	18.089	6.58703	-3.17775	-1.66801	0.000546107	0.00431209
FKBP1A	1080.63	1014.56	997.835	1713.8	1686.01	375.422	367.33	371.087	360.236	383.877	-3.50731	-1.81036	0.000546395	0.0043121
PTPN22	0	0	0	30.5568	34.6337	0.681346	2.07052	0	2.09568	0.365946	-12.0991	-3.59682	0.000546738	0.00431255
LY6G5B	0	0	0	8.35635	10.9309	24.1878	17.6936	29.2963	15.0007	35.4968	5.24739	2.3916	0.000551491	0.00434776
ABHD17C	43.3244	59.4957	57.9782	6.61025	7.93929	5.11009	12.1408	5.98527	10.3681	4.02541	-4.47459	-2.16176	0.000555168	0.00437445
CIZ1	13.6162	14.0911	23.3947	64.1069	61.7884	132.522	87.6208	146.167	78.2019	154.429	3.24085	1.69637	0.00055593	0.00437817
PURG	8.66487	4.69703	4.06864	1.7461	1.841	0	0.282344	0.315014	0.551495	0.365946	-8.58963	-3.1026	0.000556864	0.00438323
GPR173	0	0	0	6.73497	7.01879	22.8251	13.1761	21.421	12.0226	24.8843	4.91864	2.29826	0.000561096	0.00441423
ZNF275	13.6162	10.9597	12.2059	11.8486	15.1882	40.8807	35.7636	43.1569	35.6265	48.6708	2.98533	1.57789	0.000570938	0.00448931
gene:ENSG00000285839	3.71352	14.0911	2.03432	0	0	0	0	0	0	0	-139.692	-7.12611	0.000571364	0.00449031
TPP2	372.59	439.955	425.173	104.517	108.389	64.3872	114.443	64.8929	126.182	65.1384	-3.31301	-1.72814	0.000573762	0.0045068
MARK1	0	0	0	5.11359	4.48743	0	0	0	0.330897	0	-19.7191	-4.30152	0.000574156	0.00450754
INO80D	95.3136	76.7181	78.3214	21.8263	18.8702	18.0557	15.1525	16.6958	15.3315	19.3951	-3.36098	-1.74888	0.000575183	0.00451325
HLA-DPA1	0	0	0	5.36303	5.40792	0	0	0	0	0	-95.1303	-6.57183	0.000577059	0.00452561
CHTF18	11.1406	4.69703	4.06864	6.61025	10.3556	41.5621	17.223	33.0765	16.986	32.2033	3.58807	1.84321	0.000581797	0.00456039
TRIM54	1.23784	6.2627	8.13729	0	0	0	0.0941147	0	0	0	-53.5012	-5.7415	0.000582541	0.00456384
ADGRG2	0	0	0	0.249443	0	1.36269	2.16464	2.83513	3.30897	1.09784	18.4354	4.2044	0.000584239	0.00457477
MAPK11	39.6108	29.7478	43.7379	18.4588	17.7196	10.2202	7.24683	11.0255	8.27242	6.95298	-3.22633	-1.6899	0.000587028	0.00459421
CPQ	101.503	78.2838	101.716	26.8152	24.9685	20.4404	19.2935	19.5309	22.1701	15.0038	-3.37115	-1.75324	0.000589351	0.0046091
TVP23C-CDRT4	0	0	0	6.85969	4.37236	27.2538	6.21157	18.9009	7.72092	26.3481	5.86748	2.55274	0.000589543	0.0046091
KAZALD1	0	1.56568	0	0.374165	0.460249	4.42875	2.63521	4.4102	2.31628	4.7573	7.47366	2.90182	0.000591839	0.00462464
SIPA1L1	48.2757	67.324	74.2528	21.8263	24.1631	75.9701	213.17	84.7388	208.244	105.027	2.98561	1.57803	0.000592227	0.00462489
ZNF681	0	0	0	0.249443	0.230124	1.70336	3.01167	1.26006	3.86046	1.82973	11.4599	3.51852	0.000592485	0.00462489
RNASEL	0	0	0	2.99332	3.56693	14.6489	7.34095	15.4357	10.8093	14.2719	4.80985	2.26599	0.000593738	0.00463107
MSX1	22.2811	29.7478	32.5492	4.36526	4.37236	4.42875	4.32928	4.72521	2.75747	2.92757	-4.60289	-2.20254	0.000593893	0.00463107
PCDHB4	7.42703	7.82838	13.2231	0.124722	0.115062	1.02202	0.376459	0.315014	0	0	-15.6601	-3.96903	0.000596359	0.00464789
TMEM45B	0	0	0	5.86192	4.37236	0	0.282344	0.315014	0	0	-15.8577	-3.98711	0.000600464	0.00467747
TNFRSF12A	28.4703	28.1822	34.5835	83.5635	91.7046	158.413	201.029	173.888	200.303	92.5844	3.00332	1.58656	0.000601112	0.00468008
RIMS2	27.2325	10.9597	20.3432	1.87082	1.26568	1.36269	1.78818	1.26006	1.54418	3.29351	-6.3437	-2.66532	0.000603061	0.00469284
NKAIN1	3.71352	12.5254	19.3261	0	0	0.340673	0.470574	0.315014	0.220598	0.731892	-15.8961	-3.9906	0.000605478	0.00470677
FIS1	200.53	164.396	188.175	63.7328	59.4872	49.3976	46.5868	51.0323	44.4505	50.5006	-2.75849	-1.46388	0.000605269	0.00470677
NECTIN3	32.1838	40.7076	33.5663	39.6615	41.3073	70.1786	168.277	71.5082	165.228	60.747	2.85421	1.51309	0.000606064	0.00470889
PTPRQ	0	0	0	0.249443	0.115062	2.04404	3.95282	3.15014	4.08106	0	16.0171	4.00154	0.000608538	0.00472567
IL3RA	0	0	0	6.85969	7.5941	0	0.188229	0.315014	0	0.731892	-13.4582	-3.75041	0.000611571	0.00474678
GYPC	0	0	0	10.1025	7.93929	24.8691	19.0112	21.106	19.4126	29.2757	4.9856	2.31777	0.000612767	0.00475361
IL24	2.47568	10.9597	4.06864	0	0.230124	0.340673	0.188229	0	0.110299	0	-19.9586	-4.31894	0.000613494	0.00475434
PCDHA7	0	0	0	2.24499	2.30124	0	0.0941147	0.315014	0	0	-20.7114	-4.37236	0.000613477	0.00475434
NAB1	128.735	81.4151	102.733	31.1804	31.412	11.9236	35.5754	15.1207	34.5236	13.54	-3.31618	-1.72952	0.000614094	0.00475654
CENPJ	7.42703	6.2627	8.13729	16.4633	17.8346	49.7382	39.0576	49.1422	39.3767	51.5984	3.11736	1.64032	0.000616304	0.00477121
SPRR2E	24.7568	0	0	0	0	0	0	0	0	0	-183.651	-7.52082	0.000622428	0.00481614
SOX5	4.95136	1.56568	0	0	0	3.7474	3.57636	4.4102	2.64717	3.65946	11.9453	3.57837	0.000623738	0.00482157
PABPC1L	1.23784	0	0	3.86637	3.79705	18.737	15.0584	8.8204	16.7654	15.0038	4.68838	2.22909	0.000623772	0.00482157
TCF15	0	1.56568	0	2.24499	2.99162	0	0	0	0	0	-88.4807	-6.46729	0.000625893	0.00483549
GOLGA2	11.1406	15.6568	21.3604	108.633	103.786	239.834	157.266	217.36	165.669	249.575	3.86366	1.94997	0.0006277	0.00484695
TP53I13	0	4.69703	3.05148	9.97773	12.0815	42.5841	16.1877	38.4317	14.1183	34.033	4.2122	2.07457	0.000628766	0.00485269
PDZRN3	0	0	0	0	0	3.06606	6.58803	4.72521	4.19136	3.29351	184.437	7.52699	0.000631801	0.00487362
ANKLE2	12.3784	14.0911	17.2917	97.2829	94.1209	180.216	196.982	170.108	207.362	123.69	3.64189	1.86469	0.000632142	0.00487375
LOX	0	0	0	187.332	196.411	642.509	976.534	643.259	1060.41	474.998	9.8631	3.30204	0.000634093	0.00488628
CMYA5	0	0	0	0.249443	0.115062	3.06606	2.07052	3.15014	1.32359	3.65946	13.1304	3.71484	0.000635364	0.00489357
ID4	0	0	0	0	0	3.06606	9.41147	5.98527	5.29435	0.731892	199.569	7.64074	0.000635897	0.00489517
TYK2	11.1406	10.9597	10.1716	45.274	47.9809	101.861	61.7392	93.8742	56.6936	103.929	3.14453	1.65284	0.000636671	0.00489862
PCDHB16	4.95136	4.69703	5.08581	0.74833	0.805435	0	0.188229	0.315014	0.220598	0.365946	-10.4598	-3.38679	0.000639254	0.00491598
MDGA1	0	0	0	0.873052	0.460249	7.83548	1.59995	6.6153	1.98538	4.7573	8.14045	3.02511	0.00064455	0.00495418
SNCG	0	0	0	21.8263	20.8263	1.02202	1.41172	0	1.21329	0.365946	-10.3951	-3.37783	0.000649548	0.00499004
PFN2	71.7947	53.233	60.0125	109.381	100.794	178.513	307.567	174.833	309.719	182.607	2.85273	1.51234	0.000651948	0.00500592
INTS4	111.406	109.597	114.939	30.931	31.2969	29.6385	21.6464	28.3513	21.6186	29.2757	-2.9993	-1.58463	0.000655588	0.0050313
GCNT1	4.95136	4.69703	1.01716	33.0512	25.3137	43.6061	92.2324	46.9371	99.4896	37.6924	4.37197	2.12828	0.00065662	0.00503666
AHI1	7.42703	10.9597	10.1716	21.7016	23.5877	57.233	56.9394	45.9921	60.1129	43.9135	3.00051	1.58521	0.000657802	0.00504315
MDC1	6.18919	1.56568	5.08581	39.5368	45.4496	93.0037	75.0094	82.5337	65.5175	83.0698	3.87708	1.95497	0.000658262	0.00504411
MAP3K3	198.054	209.8	195.295	56.6236	71.4536	66.4312	27.0109	60.4827	29.3395	61.113	-2.97685	-1.57379	0.000662339	0.00507276
GPR85	0	0	0	0.124722	0.115062	1.70336	1.69406	2.2051	2.42658	4.02541	17.2305	4.10689	0.000665184	0.00509008
gene:ENSG00000259171	0	0	0	0	0	10.2202	0.847032	7.87535	3.08837	4.02541	202.766	7.66367	0.000665277	0.00509008
POF1B	0	0	0	3.74165	3.3368	0	0	0	0.110299	0	-32.1291	-5.00581	0.000667328	0.00510317
PDXP	0	1.56568	0	4.36526	3.3368	18.3963	11.5761	21.736	11.1402	5.85514	5.082	2.3454	0.000671525	0.00513266
ZNF514	0	0	0	14.7172	12.1966	26.2318	31.5284	31.8164	31.7661	29.2757	4.96568	2.31199	0.000674446	0.00515237
TSPAN5	7.42703	12.5254	17.2917	74.5836	80.3134	136.951	167.148	133.251	165.669	82.7038	3.46609	1.79331	0.000680652	0.00519714
SLC22A4	11.1406	6.2627	2.03432	9.10468	7.5941	1.70336	1.88229	2.52011	1.76478	0.365946	-4.53221	-2.18021	0.000682474	0.00520841
THBS1	584.26	189.447	216.655	8567.38	9144.8	225.185	931.924	277.212	926.401	383.146	-6.81614	-2.76895	0.000684342	0.00522002
ZNF641	0	0	0	3.11804	2.18618	14.6489	3.8587	13.5456	4.63255	13.1741	5.62936	2.49297	0.000685552	0.0052266
H1-0	153.492	250.508	281.754	77.2027	70.7632	61.6618	32.2813	61.1128	29.0086	77.9465	-3.17034	-1.66464	0.000687556	0.00523922
FAM107B	16.0919	12.5254	6.10297	463.216	425.615	21.4624	49.9749	25.2011	39.3767	19.0292	-5.96281	-2.57599	0.000695943	0.00530044
TWF2	14.8541	7.82838	16.2746	40.5345	42.3429	98.1138	53.0807	100.49	53.9362	93.6822	3.06695	1.6168	0.000698876	0.00532009
LRP11	2.47568	1.56568	0	45.8976	48.6713	96.4104	96.3735	105.53	89.5627	97.7076	4.78235	2.25772	0.0006996	0.00532291
C8orf88	0	0	0	1.37194	1.95606	6.13211	6.77626	8.50538	6.06644	10.6124	4.77038	2.2541	0.000700508	0.00532712
CENPU	2.47568	6.2627	6.10297	14.4677	19.3304	48.0349	35.293	41.8969	34.4133	33.667	3.27287	1.71056	0.000705216	0.00536021
HHIP	0	0	0	1336.39	1536.54	18.0557	79.8093	17.3258	65.297	9.5146	-15.1068	-3.91713	0.000716928	0.00544648
GPR37	0	0	0	5.86192	7.13386	24.1878	7.24683	23.6261	8.93421	26.7141	5.41476	2.4369	0.000718037	0.00545215
ZFPM2	39.6108	46.9703	29.4977	26.0668	22.207	7.15413	11.8585	7.87535	13.4565	5.48919	-3.23881	-1.69546	0.000724807	0.00550078
OSTF1	59.4163	57.93	56.961	102.147	91.8196	21.1217	39.3399	22.996	35.8471	17.1995	-2.71455	-1.44071	0.000726546	0.0055112
ANXA8	0	0	1.01716	0	0.115062	2.38471	1.78818	2.2051	3.63986	0.731892	17.3904	4.12022	0.000729012	0.00552711
EML3	113.881	122.123	126.128	58.6192	65.0101	40.8807	26.1639	42.2119	29.7807	38.0584	-2.69554	-1.43057	0.000729744	0.00552927
QPRT	0	0	0	0	0	2.38471	6.21157	3.78017	7.27973	1.82973	179.798	7.49024	0.000730031	0.00552927
EPAS1	188.152	104.9	107.819	416.82	431.713	67.4532	94.0206	76.5484	104.012	61.8449	-3.10869	-1.6363	0.000731227	0.00553554
TLNRD1	58.1784	54.7986	53.9095	38.1648	42.4579	9.53884	22.2111	17.0108	19.4126	12.4422	-2.86877	-1.52043	0.00073348	0.0055498
PHF14	127.497	181.618	159.694	42.6548	47.4056	32.3639	46.2103	35.2816	43.3475	24.8843	-3.01549	-1.59239	0.000736928	0.00557308
TK1	21.0433	23.4851	17.2917	12.2227	15.6485	77.6734	31.4343	63.9479	25.1482	65.1384	3.04794	1.60783	0.00073899	0.00558587
PLAUR	0	0	0	37.7907	41.5374	66.0905	134.49	82.5337	133.131	51.5984	5.76034	2.52616	0.000739422	0.00558633
SMIM14	7.42703	9.39405	6.10297	21.8263	28.3053	65.7499	29.0814	68.3581	33.3103	68.7979	3.33194	1.73636	0.000740451	0.0055913
TRIM39-RPP21	7.42703	9.39405	1.01716	0	0	0	0	0	0	0	-125.358	-6.96991	0.000741207	0.0055942
LIMS2	37.1352	28.1822	26.4462	16.9621	17.9497	6.47279	7.62329	8.8204	6.28704	5.48919	-3.2189	-1.68657	0.000744977	0.00561983
EPB41L5	0	3.13135	1.01716	28.0624	27.0396	59.2771	72.186	46.3071	69.378	46.1092	4.67277	2.22428	0.000747438	0.00563557
WNT10B	0	0	0	0.249443	0	7.4948	0.188229	3.46516	0.551495	4.39135	25.9364	4.69691	0.000750493	0.00565577
PKHD1L1	0	0	0	4.48998	5.86817	0.340673	0	0.315014	0	0.365946	-13.835	-3.79025	0.000753919	0.00567677
LONRF3	0	0	0	2.49443	2.87655	0	0	0	0	0	-88.4498	-6.46679	0.000754034	0.00567677
TM7SF2	6.18919	9.39405	5.08581	6.98441	7.36398	4.08807	1.03526	1.57507	1.32359	2.19568	-4.33948	-2.11752	0.000760249	0.00572069
[truncated: 19,487 more rows]
