# Supplementary material for: Distinct brain and lung endothelial miRNA/mRNA profiles after exposure to Plasmodium falciparum-infected red blood cells
Source: iScience. 2024 Oct 28;27(11):111265. doi: 10.1016/j.isci.2024.111265 (PMC11576406; doi:10.1016/j.isci.2024.111265)
Supplement: Table S3. miRNA profiles of HBMEC-EVs and HMVEC-L-EVs without and with TNF stimulation [file mmc4.xlsx]

## Sheet: mature miRNa
Name	Brain-Evs-24hr#1	Brain-Evs-24hr#2	Brain-Evs-24hr#3	Lung-Evs-24hr#1	Lung-Evs-24hr#2	Lung-Evs-24hr#3	Fold change	Log fold change	P-value	FDR p-value
hsa-miR-3135b	539.128	9.3875	0	50567.7	0	51009.9	52682.8	15.685	1.4116e-13	6.2534e-11
hsa-miR-490-5p	6.26893	0	0	5116.41	0	4276	2939.62	11.5214	3.34932e-09	7.41875e-07
hsa-miR-1260a	2046.81	2375.04	11.279	15631.7	70859.3	10922.4	101.64	6.66732	7.47345e-06	0.00110358
hsa-miR-485-5p	661.372	0	0	3515.57	0	3997.13	362.026	8.49995	1.06857e-05	0.00118344
hsa-miR-7977	1752.17	3388.89	5.63952	87606.8	0	19149	243.387	7.92711	2.27893e-05	0.00201913
hsa-miR-671-3p	0	0	0	2856.4	0	0	3075.13	11.5864	3.68598e-05	0.00272148
hsa-miR-424-3p	0	9.3875	0	62.7781	0	23.2391	70.7818	6.14531	6.08371e-05	0.00385012
hsa-miR-126-3p	381019	161812	264071	18833.4	1837.09	92.9565	-24.2179	-4.598	0.00012784	0.00707915
hsa-miR-139-5p	19518.3	20211.3	15644	94.1671	131.221	46.4783	-67.8984	-6.08531	0.000490969	0.0217499
hsa-miR-487a-5p	0	0	0	2511.12	0	0	922.544	9.84947	0.000473877	0.0217499
hsa-miR-1908-5p	0	0	0	2479.73	0	0	2680.42	11.3882	0.000545391	0.0219644
hsa-let-7b-5p	22101.1	37540.6	62756.6	123736	120461	219633	8.26048	3.04623	0.000673916	0.0248787
hsa-miR-1304-3p	0	0	0	1883.34	0	0	2055.52	11.0053	0.000747802	0.0254828
hsa-miR-487b-5p	0	0	0	62.7781	0	0	113.742	6.82962	0.000923506	0.0292224
hsa-miR-493-3p	1197.37	0	0	62.7781	0	0	47.4493	5.56831	0.00107815	0.0318413
hsa-miR-1247-5p	0	0	0	0	0	46.4783	113.773	6.83002	0.00132703	0.0367422
hsa-miR-126-5p	21.9412	2253	1212.5	31.389	0	0	-147.149	-7.20114	0.00240478	0.0626657
hsa-miR-146a-5p	36786.1	40751.1	20674.5	345.279	262.442	0	-31.9916	-4.99962	0.00300074	0.0738516
hsa-miR-92b-3p	6353.56	15470.6	17685.5	3766.68	0	32186.2	52.8384	5.72351	0.00330442	0.0770453
hsa-miR-424-5p	6.26893	46.9375	0	188.334	0	0	-69.6168	-6.12136	0.00387273	0.085781
hsa-miR-222-3p	0	4984.76	5.63952	62.7781	0	0	-54.0671	-5.75668	0.00511495	0.107901
hsa-miR-125a-5p	2147.11	28.1625	5.63952	62.7781	0	0	-58.4178	-5.86834	0.00551514	0.111055
hsa-miR-4747-3p	0	0	0	31.389	0	0	57.8243	5.8536	0.00835297	0.127599
hsa-miR-487a-3p	0	0	0	31.389	0	0	57.8243	5.8536	0.00835297	0.127599
hsa-miR-33b-3p	0	0	0	31.389	0	0	57.8243	5.8536	0.00835297	0.127599
hsa-miR-374a-3p	0	0	0	31.389	0	0	57.8243	5.8536	0.00835297	0.127599
hsa-miR-589-3p	0	0	0	31.389	0	0	57.8243	5.8536	0.00835297	0.127599
hsa-miR-6787-3p	0	0	0	31.389	0	0	57.8243	5.8536	0.00835297	0.127599
hsa-miR-5100	0	0	0	31.389	0	0	57.8243	5.8536	0.00835297	0.127599
hsa-miR-23a-3p	31824.2	36385.9	40339.5	1412.51	0	46.4783	-22.6113	-4.49897	0.0106073	0.156634
hsa-miR-1271-5p	6.26893	0	0	31.389	0	0	24.1224	4.5923	0.0143962	0.205727
hsa-miR-375-3p	3.13446	178.362	78.9533	0	0	1859.13	39.2077	5.29306	0.0176829	0.244797
hsa-miR-320a-3p	454.497	215.912	1173.02	31.389	0	23.2391	-28.633	-4.83961	0.0202324	0.271605
hsa-miR-451a	27194.6	7575.71	2238.89	12681.2	84243.9	23913.1	5.67853	2.50552	0.0263074	0.34277
hsa-miR-31-5p	6.26893	0	0	31.389	0	0	-38.2529	-5.2575	0.0281564	0.34648
hsa-miR-26b-5p	310.312	9.3875	5.63952	62.7781	131.221	0	-21.0337	-4.39463	0.0275466	0.34648
hsa-miR-103a-3p	21.9412	9.3875	1167.38	94.1671	0	0	-22.6529	-4.50162	0.0291542	0.349063
hsa-miR-378a-3p	1012.43	2356.26	16.9186	31.389	0	0	-45.8977	-5.52035	0.0314336	0.36645
hsa-miR-154-5p	1965.31	0	0	31.389	0	0	-26.2419	-4.7138	0.034014	0.386364
hsa-miR-487b-3p	420.018	0	0	31.389	0	0	-20.1062	-4.32957	0.0504012	0.507448
hsa-miR-369-5p	589.279	0	1398.6	62.7781	0	0	-18.9346	-4.24295	0.0479823	0.507448
hsa-miR-23b-3p	18.8068	9.3875	5.63952	31.389	0	23.2391	-16.0956	-4.00859	0.0485481	0.507448
hsa-miR-99b-5p	17593.7	10354.4	4150.69	565.003	131.221	69.7174	-9.37153	-3.22828	0.0495139	0.507448
hsa-miR-10b-5p	642.565	9.3875	0	31.389	0	0	-27.5969	-4.78643	0.0503017	0.507448
hsa-miR-28-3p	6.26893	0	981.277	31.389	0	0	-24.8258	-4.63377	0.0532232	0.523952
hsa-miR-30b-5p	3.13446	28.1625	5.63952	0	0	23.2391	-22.5281	-4.49365	0.0559311	0.538641
hsa-miR-181a-5p	49098.2	25806.2	38061.1	1443.9	524.884	2602.78	-8.12659	-3.02265	0.0615365	0.55634
hsa-miR-4455	3.13446	0	0	31.389	0	0	12.5436	3.64888	0.0600384	0.55634
hsa-miR-493-5p	269.564	1436.29	0	3233.07	0	0	19.7811	4.30605	0.0605624	0.55634
hsa-miR-143-3p	1639.32	300.4	45.1162	3703.91	0	23.2391	-12.2287	-3.6122	0.0636401	0.563852
hsa-miR-382-5p	579.876	1746.07	0	125.556	0	0	-15.6122	-3.9646	0.0656044	0.569858
hsa-miR-34a-5p	29159.9	12241.3	9976.31	12681.2	0	4090.09	-5.18722	-2.37496	0.0805927	0.686588
hsa-miR-345-5p	0	0	0	62.7781	0	0	-19.2953	-4.27018	0.0839952	0.697944
hsa-miR-21-5p	3275.52	93.875	2836.68	2165.84	0	23.2391	-7.4069	-2.88887	0.0850767	0.697944
hsa-miR-409-3p	3933.75	1633.42	1353.49	125.556	0	0	-10.8247	-3.43626	0.0866854	0.698211
hsa-miR-425-5p	0	0	0	31.389	0	0	-15.1979	-3.9258	0.0928976	0.716556
hsa-miR-25-3p	457.632	84.4875	981.277	156.945	0	0	-8.31892	-3.0564	0.0938154	0.716556
hsa-let-7a-5p	47082.8	90307.7	316033	265771	65216.8	299181	2.99818	1.58409	0.0918016	0.716556
hsa-miR-337-3p	2736.39	4393.35	1037.67	5555.86	0	3207	13.444	3.74889	0.0964874	0.718428
hsa-miR-29a-3p	3.13446	9.3875	0	0	0	23.2391	-14.305	-3.83844	0.097304	0.718428
hsa-miR-191-5p	3551.35	3942.75	3857.43	659.17	0	46.4783	-7.69269	-2.94349	0.11201	0.800329
hsa-miR-92a-3p	38014.8	48946.4	42522	72132	2886.86	39250.9	3.92989	1.97449	0.111275	0.800329
hsa-miR-150-5p	2974.61	2506.46	1612.9	0	393.663	0	-8.4632	-3.0812	0.115024	0.808819
hsa-miR-196b-5p	8021.09	1980.76	4325.51	0	0	0	-5854.48	-12.5153	0.11949	0.811204
hsa-miR-15b-5p	1250.65	0	5.63952	62.7781	0	23.2391	-8.91659	-3.15649	0.122688	0.811204
hsa-miR-484	15.6723	28.1625	22.5581	62.7781	0	46.4783	-7.773	-2.95847	0.117621	0.811204
hsa-miR-223-3p	0	37.55	5.63952	0	0	23.2391	-14.5734	-3.86527	0.121912	0.811204
hsa-miR-151a-3p	0	0	5.63952	62.7781	0	0	-10.0664	-3.33147	0.129075	0.828698
hsa-miR-26a-5p	20201.6	10326.2	10128.6	8255.32	1443.43	418.304	-5.38593	-2.4292	0.128532	0.828698
hsa-miR-532-5p	673.91	2093.41	5.63952	0	0	0	-3407.35	-11.7344	0.144851	0.916697
hsa-miR-16-5p	514.052	1624.04	2171.22	2260.01	0	46.4783	-5.9099	-2.56313	0.147947	0.923108
hsa-miR-4429	0	0	0	0	0	0	-84.2463	-6.39654	0.445136	0.972685
hsa-miR-320b	0	0	0	0	0	0	-5.33847	-2.41643	0.761605	0.972685
hsa-miR-320c	0	0	0	0	0	0	-90.22	-6.49538	0.436487	0.972685
hsa-miR-548k	633.162	0	0	0	0	0	-423.967	-8.72781	0.284896	0.972685
hsa-miR-495-3p	0	0	0	0	0	0	-7.60022	-2.92604	0.717052	0.972685
hsa-miR-543	6.26893	0	0	0	0	0	-4.20531	-2.07221	0.794258	0.972685
hsa-miR-148a-5p	0	0	0	0	0	0	-4.94021	-2.30457	0.771165	0.972685
hsa-miR-362-3p	0	0	0	0	0	0	-2.7348	-1.45144	0.853928	0.972685
hsa-miR-329-3p	0	0	0	0	0	0	-85.3616	-6.41552	0.443972	0.972685
hsa-miR-376c-3p	1629.92	9.3875	0	219.723	0	0	-2.93714	-1.55441	0.457943	0.972685
hsa-miR-181c-5p	3.13446	9.3875	1082.79	0	0	0	-1184.33	-10.2099	0.205058	0.972685
hsa-miR-181b-5p	2513.84	3792.55	4393.19	345.279	131.221	46.4783	-4.42339	-2.14515	0.198709	0.972685
hsa-miR-181d-5p	786.751	0	0	0	0	0	-864.039	-9.75495	0.226189	0.972685
hsa-miR-181c-3p	0	0	0	0	0	0	-1.99919	-0.999416	0.899123	0.972685
hsa-miR-100-5p	57893.6	38207.1	63743.5	29348.7	0	11689.3	-1.88569	-0.915091	0.552575	0.972685
hsa-miR-99a-5p	1839.93	103.262	1381.68	4739.74	0	23.2391	-3.78122	-1.91885	0.32356	0.972685
hsa-miR-193b-3p	0	0	5.63952	0	0	116.196	-3.29886	-1.72197	0.365821	0.972685
hsa-miR-193a-3p	0	0	0	0	0	0	-97.6894	-6.61013	0.422685	0.972685
hsa-miR-129-2-3p	0	0	0	0	0	0	-39.878	-5.31752	0.524782	0.972685
hsa-miR-6819-3p	0	9.3875	0	0	0	0	-1.26334	-0.337243	0.966001	0.972685
hsa-miR-22-3p	15960.7	2253	4686.44	1757.79	0	3648.54	-4.73639	-2.24379	0.208789	0.972685
hsa-miR-28-5p	0	1605.26	0	0	0	0	-386.376	-8.59386	0.293212	0.972685
hsa-miR-708-5p	0	0	0	0	0	0	-6.20919	-2.63441	0.743549	0.972685
hsa-miR-371a-3p	0	0	0	0	0	0	-6.55079	-2.71167	0.736541	0.972685
hsa-miR-369-3p	3.13446	0	0	0	0	0	-116.688	-6.86652	0.404914	0.972685
hsa-miR-410-3p	3.13446	0	0	0	0	0	-139.098	-7.11996	0.392706	0.972685
hsa-miR-656-3p	0	0	0	0	0	0	-1.26389	-0.337868	0.965943	0.972685
hsa-miR-34c-3p	0	0	0	0	0	0	-76.2506	-6.25268	0.449091	0.972685
hsa-miR-154-3p	0	0	0	0	0	0	-9.39238	-3.23149	0.690302	0.972685
hsa-miR-382-3p	0	0	0	0	0	0	-5.2424	-2.39023	0.765306	0.972685
hsa-miR-362-5p	0	0	0	0	0	0	-1.26334	-0.337243	0.966001	0.972685
hsa-miR-501-5p	0	0	0	0	0	0	-1.26334	-0.337243	0.966001	0.972685
hsa-miR-501-3p	0	0	0	0	0	0	-20.4528	-4.35423	0.597099	0.972685
hsa-miR-502-3p	0	0	0	0	0	0	-8.3125	-3.05528	0.70589	0.972685
hsa-miR-652-3p	908.995	9.3875	0	0	0	0	-906.424	-9.82404	0.223827	0.972685
hsa-miR-511-3p	0	0	0	0	0	0	-4.96929	-2.31304	0.772071	0.972685
hsa-miR-363-3p	0	0	0	0	0	0	-2.7348	-1.45144	0.853691	0.972685
hsa-miR-10b-3p	0	0	0	0	0	0	-4.20531	-2.07221	0.794068	0.972685
hsa-miR-214-3p	0	2234.22	0	0	131.221	23.2391	1.356	0.439357	0.858289	0.972685
hsa-miR-125a-3p	0	0	0	0	0	0	-9.75459	-3.28608	0.685282	0.972685
hsa-miR-199a-3p	28.2102	7190.82	22.5581	7313.65	524.884	46.4783	1.67504	0.744192	0.665484	0.972685
hsa-miR-181a-2-3p	583.01	0	0	94.1671	0	0	-3.11954	-1.64133	0.556568	0.972685
hsa-miR-181a-3p	529.724	0	0	94.1671	131.221	0	-1.77631	-0.828886	0.751263	0.972685
hsa-miR-132-5p	18.8068	0	0	125.556	0	0	-5.0381	-2.33288	0.192235	0.972685
hsa-miR-212-5p	0	0	0	0	0	0	-1.99919	-0.999416	0.899123	0.972685
hsa-miR-1249-3p	0	0	0	0	0	0	-5.67733	-2.50521	0.752089	0.972685
hsa-miR-125b-1-3p	0	0	0	31.389	0	0	-3.59001	-1.84399	0.529737	0.972685
hsa-miR-136-5p	0	0	0	0	0	0	-1.99919	-0.999416	0.899123	0.972685
hsa-miR-1307-3p	0	9.3875	0	0	0	23.2391	-5.44195	-2.44412	0.427263	0.972685
hsa-miR-130b-5p	476.439	0	5.63952	0	0	0	-2.09708	-1.06838	0.89259	0.972685
hsa-miR-29a-5p	0	0	0	0	0	0	-2.7348	-1.45144	0.853691	0.972685
hsa-miR-17-3p	0	0	0	0	0	0	-1.99919	-0.999416	0.899123	0.972685
hsa-miR-20a-3p	0	0	0	0	0	0	-3.47018	-1.79501	0.820171	0.972685
hsa-miR-18a-3p	0	0	0	0	0	0	-1.99919	-0.999416	0.899123	0.972685
hsa-miR-422a	3.13446	0	0	0	0	0	-6.55079	-2.71167	0.736643	0.972685
hsa-miR-378d	0	0	0	0	0	0	-1.99919	-0.999416	0.899123	0.972685
hsa-miR-378h	0	0	0	0	0	0	-2.7348	-1.45144	0.853691	0.972685
hsa-miR-27b-5p	0	0	0	0	0	0	-11.2115	-3.48691	0.668944	0.972685
hsa-let-7d-5p	7920.79	6618.19	14668.4	29819.6	131.221	14640.7	2.0698	1.04949	0.544245	0.972685
hsa-miR-202-3p	0	0	0	0	0	0	-212.584	-7.73189	0.356476	0.972685
hsa-miR-377-5p	3.13446	0	0	0	0	0	-4.20531	-2.07221	0.793879	0.972685
hsa-miR-219a-1-3p	0	0	0	0	0	0	-1.99919	-0.999416	0.899123	0.972685
hsa-miR-107	0	0	0	0	0	0	-17.8519	-4.158	0.613029	0.972685
hsa-miR-381-5p	0	0	0	0	0	0	-1.26334	-0.337243	0.966001	0.972685
hsa-miR-221-3p	3560.75	1530.16	2611.1	7156.7	0	0	-1.09871	-0.135811	0.944999	0.972685
hsa-miR-423-3p	6159.22	3839.49	4703.36	4111.96	131.221	278.87	-2.77369	-1.47181	0.337856	0.972685
hsa-miR-138-5p	9.40339	0	0	0	0	0	-11.9692	-3.58126	0.656914	0.972685
hsa-miR-103a-2-5p	0	0	0	0	0	0	-1.26334	-0.337243	0.966001	0.972685
hsa-miR-671-5p	0	0	0	0	0	0	-3.47018	-1.79501	0.820225	0.972685
hsa-miR-34c-5p	0	0	0	0	0	0	-20.4528	-4.35423	0.59762	0.972685
hsa-miR-449b-5p	0	0	0	0	0	0	-2.7348	-1.45144	0.85372	0.972685
hsa-miR-365b-5p	0	0	0	0	0	0	-1.99919	-0.999416	0.899123	0.972685
hsa-miR-365a-5p	0	0	0	0	0	0	-1.99919	-0.999416	0.899123	0.972685
hsa-miR-296-5p	3.13446	0	0	0	0	0	-142.336	-7.15315	0.392481	0.972685
hsa-miR-27a-5p	498.38	0	0	94.1671	0	0	4.29573	2.1029	0.389889	0.972685
hsa-miR-625-5p	0	9.3875	0	0	0	0	-460.13	-8.8459	0.287545	0.972685
hsa-miR-342-5p	0	0	0	0	0	0	-1.99919	-0.999416	0.899123	0.972685
hsa-miR-323a-5p	0	0	5.63952	0	0	0	-1.99919	-0.999416	0.899123	0.972685
hsa-miR-409-5p	0	0	0	0	0	0	-4.94021	-2.30457	0.771238	0.972685
hsa-miR-410-5p	0	844.875	0	0	0	0	-2.7348	-1.45144	0.853791	0.972685
hsa-miR-491-5p	0	0	0	0	0	0	-92.0929	-6.52502	0.430305	0.972685
hsa-miR-22-5p	3.13446	0	0	0	0	0	-34.2639	-5.09862	0.54221	0.972685
hsa-miR-19b-1-5p	0	0	0	0	0	0	-3.47018	-1.79501	0.820279	0.972685
hsa-miR-9-3p	0	0	0	0	0	0	-1.99919	-0.999416	0.899123	0.972685
hsa-miR-208b-3p	0	0	0	0	0	0	-5.2424	-2.39023	0.765412	0.972685
hsa-miR-208a-3p	0	0	0	0	0	0	-1.26334	-0.337243	0.966001	0.972685
hsa-miR-374b-5p	0	0	0	0	0	0	-747.973	-9.54684	0.244344	0.972685
hsa-miR-421	0	0	1426.8	0	0	0	-5.87438	-2.55444	0.750212	0.972685
hsa-miR-377-3p	0	0	0	0	0	0	-402.589	-8.65316	0.29007	0.972685
hsa-miR-23c	0	0	0	0	0	0	-1.26334	-0.337243	0.966001	0.972685
hsa-miR-376a-3p	1705.15	0	5.63952	62.7781	0	0	-5.40838	-2.4352	0.38679	0.972685
hsa-miR-376b-3p	6.26893	1793.01	5.63952	94.1671	0	0	-2.37624	-1.24868	0.668028	0.972685
hsa-miR-433-3p	0	0	0	0	0	0	-79.5761	-6.31426	0.441148	0.972685
hsa-miR-1260b	3.13446	0	0	0	0	23.2391	-3.00218	-1.58601	0.565886	0.972685
hsa-miR-7975	0	0	0	0	0	0	-50.787	-5.66639	0.493575	0.972685
hsa-miR-425-3p	573.607	0	0	31.389	0	0	3.99647	1.99873	0.409875	0.972685
hsa-miR-215-5p	0	0	0	0	0	0	-2.7348	-1.45144	0.853841	0.972685
hsa-miR-1261	0	0	0	0	0	0	-61.9401	-5.9528	0.473351	0.972685
hsa-miR-135a-2-3p	0	0	0	0	0	0	-1.99919	-0.999416	0.899123	0.972685
hsa-miR-297	0	0	0	0	0	0	-3.47018	-1.79501	0.820126	0.972685
hsa-miR-10395-3p	0	0	0	0	0	0	-1.26334	-0.337243	0.966001	0.972685
hsa-miR-576-5p	3.13446	0	0	31.389	0	0	-1.72044	-0.782778	0.795128	0.972685
hsa-miR-450a-1-3p	0	0	0	0	0	0	-15.9987	-3.99988	0.625806	0.972685
hsa-miR-186-5p	3.13446	0	0	0	0	0	-5.54981	-2.47244	0.758071	0.972685
hsa-miR-20b-5p	0	0	0	0	0	0	-4.96929	-2.31304	0.772111	0.972685
hsa-miR-93-5p	28.2102	0	16.9186	125.556	0	2370.39	5.48694	2.456	0.240431	0.972685
hsa-miR-17-5p	0	0	5.63952	0	0	0	-63.8686	-5.99704	0.468695	0.972685
hsa-miR-7-1-3p	0	9.3875	0	62.7781	0	0	-6.62399	-2.7277	0.345925	0.972685
hsa-miR-21-3p	0	0	0	0	0	0	-1.99919	-0.999416	0.899123	0.972685
hsa-miR-652-5p	0	0	0	0	0	0	-18.223	-4.18769	0.610692	0.972685
hsa-miR-99b-3p	3.13446	1652.2	0	31.389	0	0	-1.6964	-0.762476	0.799719	0.972685
hsa-miR-100-3p	0	0	0	0	0	0	-4.96929	-2.31304	0.772151	0.972685
hsa-miR-34b-3p	0	0	0	0	0	0	-4.20531	-2.07221	0.793977	0.972685
hsa-miR-34a-3p	0	0	0	0	0	0	-1.26334	-0.337243	0.966001	0.972685
hsa-miR-33a-3p	0	0	0	0	0	0	-1.26334	-0.337243	0.966001	0.972685
hsa-miR-323a-3p	0	0	1077.15	62.7781	0	0	-8.34736	-3.06132	0.308352	0.972685
hsa-miR-941	1711.42	0	834.649	0	0	0	-70.8626	-6.14695	0.462768	0.972685
hsa-miR-574-3p	1645.59	3417.05	930.521	376.668	131.221	3718.26	3.25398	1.70221	0.321758	0.972685
hsa-miR-497-5p	0	0	0	0	0	0	-670.013	-9.38805	0.248225	0.972685
hsa-miR-301a-3p	0	9.3875	0	0	0	0	-31.646	-4.98395	0.54833	0.972685
hsa-miR-130b-3p	0	0	0	0	0	0	-283.035	-8.14484	0.328142	0.972685
hsa-miR-130a-3p	0	0	0	0	0	0	-27.1624	-4.76354	0.56549	0.972685
hsa-miR-140-5p	0	0	0	0	0	0	-116.526	-6.86451	0.411121	0.972685
hsa-miR-142-5p	0	0	0	0	0	0	-8.67117	-3.11623	0.70052	0.972685
hsa-miR-136-3p	0	0	0	0	0	0	-17.8519	-4.158	0.613402	0.972685
hsa-miR-188-5p	0	0	0	0	0	0	-4.79722	-2.2622	0.77614	0.972685
hsa-miR-200a-5p	0	0	0	0	0	0	-5.2424	-2.39023	0.765515	0.972685
hsa-miR-200b-5p	0	0	0	0	0	0	-5.2424	-2.39023	0.765615	0.972685
hsa-miR-195-3p	0	0	0	0	0	0	-12.6779	-3.66424	0.654074	0.972685
hsa-miR-199a-5p	18.8068	28.1625	0	156.945	131.221	46.4783	-2.43384	-1.28323	0.507391	0.972685
hsa-miR-199b-5p	0	28.1625	0	62.7781	0	0	4.8021	2.26367	0.290351	0.972685
hsa-miR-106b-3p	0	0	0	0	0	0	-4.96929	-2.31304	0.77223	0.972685
hsa-miR-26a-2-3p	0	0	0	0	0	0	-10.4816	-3.38979	0.676236	0.972685
hsa-miR-26a-1-3p	0	0	0	0	0	0	-1.26334	-0.337243	0.966001	0.972685
hsa-miR-6511b-3p	0	0	0	0	0	0	-1.26401	-0.338003	0.966065	0.972685
hsa-miR-532-3p	0	9.3875	0	0	0	0	-6.55079	-2.71167	0.736744	0.972685
hsa-miR-3605-3p	0	0	0	0	0	0	-76.4391	-6.25624	0.455698	0.972685
hsa-miR-326	0	0	0	0	0	0	-4.94021	-2.30457	0.77131	0.972685
hsa-miR-26b-3p	0	0	0	0	0	0	-1.99919	-0.999416	0.899123	0.972685
hsa-miR-15b-3p	0	0	0	0	0	0	-7.24731	-2.85744	0.723418	0.972685
hsa-miR-324-5p	0	0	0	0	0	0	-5.87438	-2.55444	0.750305	0.972685
hsa-miR-874-5p	0	0	0	0	0	0	-1.99919	-0.999416	0.899123	0.972685
hsa-miR-6789-3p	0	0	0	0	0	0	-51.9023	-5.69773	0.491137	0.972685
hsa-miR-760	0	0	0	0	0	0	-2.7348	-1.45144	0.853902	0.972685
hsa-miR-1268a	3.13446	0	0	0	0	0	-109.899	-6.78003	0.412807	0.972685
hsa-miR-486-3p	0	9.3875	0	0	0	0	-3.47018	-1.79501	0.819735	0.972685
hsa-miR-128-1-5p	0	0	0	0	0	0	-1.26334	-0.337243	0.966001	0.972685
hsa-miR-7704	0	0	0	0	0	0	-2.7348	-1.45144	0.853949	0.972685
hsa-miR-193b-5p	0	0	0	0	0	0	-4.94021	-2.30457	0.771029	0.972685
hsa-miR-1227-3p	0	9.3875	0	0	0	0	-1.26401	-0.338003	0.966044	0.972685
hsa-miR-223-5p	0	0	0	0	0	0	-1.99919	-0.999416	0.899123	0.972685
hsa-miR-331-5p	0	0	0	0	0	0	-1.99919	-0.999416	0.899123	0.972685
hsa-let-7b-3p	253.892	0	0	0	0	0	-22.314	-4.47988	0.587185	0.972685
hsa-miR-98-3p	0	0	0	0	0	0	-3.47018	-1.79501	0.819659	0.972685
hsa-let-7a-3p	0	0	812.091	0	0	0	-366.262	-8.51673	0.293424	0.972685
hsa-let-7f-1-3p	388.674	901.2	795.173	0	0	0	-276.699	-8.11217	0.327634	0.972685
hsa-let-7f-2-3p	0	0	0	0	0	0	-43.9979	-5.45936	0.512551	0.972685
hsa-let-7d-3p	1451.26	1370.57	2193.77	0	0	1557.02	4.54203	2.18334	0.28947	0.972685
hsa-let-7e-3p	9.40339	0	0	125.556	0	0	-5.22827	-2.38633	0.216206	0.972685
hsa-miR-222-5p	0	0	0	0	0	0	-1.26334	-0.337243	0.966001	0.972685
hsa-miR-188-3p	0	0	0	0	0	0	-3.47018	-1.79501	0.82047	0.972685
hsa-miR-1468-5p	583.01	18.775	1032.03	0	0	0	-364.993	-8.51173	0.306991	0.972685
hsa-miR-378a-5p	0	0	0	0	0	0	-20.0809	-4.32775	0.59919	0.972685
hsa-miR-127-5p	0	0	0	0	0	0	-1.26334	-0.337243	0.966001	0.972685
hsa-miR-192-5p	855.709	9.3875	0	0	0	0	-141.794	-7.14765	0.391177	0.972685
hsa-miR-6514-3p	0	0	0	0	0	0	-339.239	-8.40616	0.314829	0.972685
hsa-let-7i-3p	0	0	0	0	0	0	-104.399	-6.70597	0.41555	0.972685
hsa-miR-328-3p	3.13446	18.775	0	0	0	0	-157.904	-7.3029	0.376303	0.972685
hsa-miR-30c-2-3p	0	0	0	0	0	0	-5.87438	-2.55444	0.750425	0.972685
hsa-miR-30c-1-3p	0	0	0	0	0	0	-4.94021	-2.30457	0.771464	0.972685
hsa-miR-30b-3p	0	0	0	0	0	0	-7.95542	-2.99194	0.711225	0.972685
hsa-miR-29b-2-5p	0	0	0	0	0	0	-1.99919	-0.999416	0.899123	0.972685
hsa-let-7c-3p	0	0	0	0	0	0	-23.0592	-4.52727	0.583195	0.972685
hsa-let-7a-2-3p	0	0	0	0	0	0	-4.20713	-2.07284	0.792398	0.972685
hsa-let-7g-3p	0	0	0	0	0	0	-7.74571	-2.9534	0.712373	0.972685
hsa-miR-210-3p	0	0	0	0	0	0	-4.96929	-2.31304	0.772307	0.972685
hsa-miR-744-3p	379.27	0	0	0	0	0	-85.7577	-6.42219	0.438614	0.972685
hsa-miR-374b-3p	0	0	0	0	0	0	-6.89723	-2.78602	0.730066	0.972685
hsa-miR-30e-3p	846.305	0	0	0	0	0	-438.171	-8.77535	0.277642	0.972685
hsa-miR-30a-3p	3.13446	2900.74	2131.74	8255.32	0	0	2.28696	1.19343	0.565169	0.972685
hsa-miR-129-5p	0	0	0	0	0	0	-79.3823	-6.31074	0.445847	0.972685
hsa-miR-12136	388.674	0	0	0	0	0	-471.022	-8.87965	0.278662	0.972685
hsa-miR-6796-3p	0	0	0	0	0	0	-1.26389	-0.337868	0.965979	0.972685
hsa-miR-495-5p	504.649	0	0	0	0	0	-4.94235	-2.3052	0.770722	0.972685
hsa-miR-6529-5p	0	0	0	0	0	0	-205.508	-7.68305	0.359399	0.972685
hsa-miR-296-3p	0	0	0	0	0	0	-11.2115	-3.48691	0.669539	0.972685
hsa-miR-329-5p	0	0	0	0	0	0	-3.47018	-1.79501	0.820939	0.972685
hsa-miR-330-3p	0	0	0	0	0	0	-3.47018	-1.79501	0.820984	0.972685
hsa-miR-455-3p	586.145	0	0	0	0	0	-185.742	-7.53715	0.366171	0.972685
hsa-miR-4732-3p	3.13446	215.912	45.1162	0	0	0	-49.0891	-5.61733	0.493881	0.972685
hsa-miR-370-3p	0	0	0	31.389	0	0	-5.84187	-2.54643	0.399352	0.972685
hsa-miR-191-3p	454.497	0	0	0	0	0	-13.7821	-3.78473	0.644576	0.972685
hsa-miR-204-3p	0	0	0	0	0	0	-7.24731	-2.85744	0.723488	0.972685
hsa-miR-619-5p	0	0	0	0	0	0	-70.8626	-6.14695	0.463165	0.972685
hsa-miR-29b-1-5p	0	0	0	0	0	0	-4.96929	-2.31304	0.772651	0.972685
hsa-miR-145-3p	0	0	0	0	0	0	-17.1101	-4.09677	0.618127	0.972685
hsa-miR-6131	6.26893	0	0	0	0	0	-1.26401	-0.338003	0.966018	0.972685
hsa-miR-103a-1-5p	0	0	0	0	0	0	-1.99919	-0.999416	0.899123	0.972685
hsa-miR-505-5p	0	0	0	0	0	0	-3.47018	-1.79501	0.82103	0.972685
hsa-miR-615-5p	0	0	0	0	0	0	-3.47018	-1.79501	0.821075	0.972685
hsa-miR-503-3p	0	0	0	0	0	0	-4.96929	-2.31304	0.772688	0.972685
hsa-miR-877-5p	0	0	0	0	0	0	-220.333	-7.78354	0.349796	0.972685
hsa-miR-485-3p	3.13446	0	0	31.389	0	0	2.63882	1.39989	0.537764	0.972685
hsa-miR-145-5p	3.13446	28.1625	5.63952	0	0	69.7174	-3.95444	-1.98347	0.40375	0.972685
hsa-miR-670-5p	0	0	0	0	0	0	-1.99919	-0.999416	0.899123	0.972685
hsa-miR-203a-3p	0	9.3875	0	0	0	0	-526.85	-9.04125	0.273144	0.972685
hsa-miR-33a-5p	0	0	0	0	0	0	-9.39238	-3.23149	0.689826	0.972685
hsa-miR-106b-5p	0	0	0	0	0	0	-15.2588	-3.93157	0.632981	0.972685
hsa-miR-20a-5p	0	0	0	0	0	0	-89.2486	-6.47976	0.435771	0.972685
hsa-miR-200a-3p	0	18.775	0	0	0	0	-252.209	-7.97848	0.328706	0.972685
hsa-miR-132-3p	0	0	0	0	0	0	-4.20531	-2.07221	0.793684	0.972685
hsa-miR-212-3p	0	0	1319.65	31.389	0	0	2.54007	1.34487	0.563087	0.972685
hsa-miR-582-3p	0	0	0	0	0	0	-1.99919	-0.999416	0.899123	0.972685
hsa-miR-18a-5p	0	0	0	0	0	0	-10.4816	-3.38979	0.67689	0.972685
hsa-miR-302d-3p	0	0	0	0	0	0	-8.67117	-3.11623	0.700236	0.972685
hsa-miR-302a-3p	0	0	0	0	0	0	-7.24731	-2.85744	0.723557	0.972685
hsa-miR-200c-3p	0	0	0	0	0	0	-9.41088	-3.23433	0.688207	0.972685
hsa-miR-200b-3p	0	0	0	62.7781	0	0	-5.07867	-2.34445	0.40548	0.972685
hsa-miR-429	0	9.3875	0	0	0	0	-1417.47	-10.4691	0.201472	0.972685
hsa-miR-365a-3p	3.13446	0	823.37	62.7781	0	23.2391	-5.08062	-2.345	0.309936	0.972685
hsa-miR-590-3p	0	0	0	0	0	0	-36.2873	-5.18139	0.529877	0.972685
hsa-miR-101-3p	0	0	0	0	0	0	-10.4816	-3.38979	0.677463	0.972685
hsa-miR-144-3p	0	0	0	0	0	0	-9.75459	-3.28608	0.685362	0.972685
hsa-miR-140-3p	0	0	0	0	0	0	-12.6779	-3.66424	0.654206	0.972685
hsa-miR-660-5p	0	0	0	0	0	0	-88.7075	-6.47098	0.439826	0.972685
hsa-miR-10a-5p	2413.54	3557.86	1122.26	3735.3	0	23.2391	3.00173	1.5858	0.475073	0.972685
hsa-miR-433-5p	0	0	0	0	0	0	-7.24731	-2.85744	0.723626	0.972685
hsa-miR-598-3p	0	0	0	0	0	0	-7.95542	-2.99194	0.711388	0.972685
hsa-miR-29b-3p	6.26893	0	0	0	0	0	-275.908	-8.10804	0.329077	0.972685
hsa-miR-29c-3p	0	0	0	0	0	0	-140.053	-7.12983	0.389159	0.972685
hsa-miR-195-5p	0	0	0	31.389	0	23.2391	-4.33942	-2.1175	0.407261	0.972685
hsa-miR-15a-5p	0	0	0	0	0	0	-33.1417	-5.05058	0.545382	0.972685
hsa-miR-503-5p	0	0	0	0	0	0	-28.6563	-4.84078	0.558921	0.972685
hsa-miR-1197	0	0	0	0	0	0	-1.26334	-0.337243	0.966001	0.972685
hsa-miR-196a-5p	3.13446	9.3875	5.63952	0	0	0	-470.879	-8.87921	0.277726	0.972685
hsa-miR-411-5p	13305.8	65.7125	11.279	6748.64	131.221	0	-4.23676	-2.08296	0.269676	0.972685
hsa-miR-381-3p	0	9.3875	0	62.7781	0	0	-1.41832	-0.504179	0.847286	0.972685
hsa-miR-1843	0	0	0	0	0	0	-13.4137	-3.74564	0.647841	0.972685
hsa-miR-183-5p	0	0	0	0	0	0	-7.60022	-2.92604	0.717059	0.972685
hsa-miR-135b-5p	0	0	0	0	0	0	-23.3342	-4.54437	0.579814	0.972685
hsa-miR-135a-5p	0	0	0	0	0	0	-86.3846	-6.4327	0.439921	0.972685
hsa-miR-411-3p	3.13446	0	0	0	0	0	-11.5774	-3.53323	0.66629	0.972685
hsa-miR-379-3p	0	0	0	0	0	0	-92.9191	-6.5379	0.427746	0.972685
hsa-miR-380-3p	0	0	0	0	0	0	-4.94021	-2.30457	0.771928	0.972685
hsa-miR-654-3p	0	0	0	0	0	0	-125.513	-6.97169	0.40077	0.972685
hsa-miR-299-3p	0	0	0	0	0	0	-1.99919	-0.999416	0.899123	0.972685
hsa-miR-892c-5p	0	0	0	0	0	0	-1.99919	-0.999416	0.899123	0.972685
hsa-miR-32-5p	0	0	0	0	0	0	-11.2115	-3.48691	0.670266	0.972685
hsa-miR-335-5p	0	0	0	0	0	0	-15.6412	-3.96728	0.628074	0.972685
hsa-miR-125b-2-3p	0	0	0	0	0	0	-32.3938	-5.01765	0.547846	0.972685
hsa-miR-128-3p	12.5379	0	0	0	0	0	-552.16	-9.10894	0.255986	0.972685
hsa-miR-1226-3p	0	0	1246.33	0	0	0	-51.6498	-5.69069	0.486981	0.972685
hsa-miR-148a-3p	0	0	0	0	0	0	-492.531	-8.94407	0.280116	0.972685
hsa-miR-148b-3p	0	0	0	0	0	0	-8.3125	-3.05528	0.705963	0.972685
hsa-miR-152-3p	0	0	0	0	0	0	-43.2487	-5.43459	0.515796	0.972685
hsa-miR-153-5p	0	0	0	0	0	0	-1.26334	-0.337243	0.966001	0.972685
hsa-miR-338-3p	0	0	0	0	0	0	-1.99919	-0.999416	0.899123	0.972685
hsa-miR-361-3p	0	0	0	0	0	0	-1.99919	-0.999416	0.899123	0.972685
hsa-miR-6756-3p	416.884	0	0	0	0	0	-71.9779	-6.16948	0.460654	0.972685
hsa-miR-6803-3p	0	0	0	0	0	23.2391	-1.09401	-0.129622	0.964136	0.972685
hsa-miR-125b-5p	4585.72	2130.96	6259.87	7658.93	131.221	162.674	-2.69186	-1.4286	0.405365	0.972685
hsa-miR-339-5p	0	0	0	0	0	0	-11.5774	-3.53323	0.66583	0.972685
hsa-miR-615-3p	3.13446	0	0	0	0	0	-43.9979	-5.45936	0.512241	0.972685
hsa-miR-340-3p	0	0	0	0	0	0	-6.55079	-2.71167	0.737176	0.972685
hsa-miR-877-3p	0	0	0	0	0	0	-93.5451	-6.54759	0.429381	0.972685
hsa-miR-205-5p	0	28.1625	11.279	0	0	0	-5.33847	-2.41643	0.76165	0.972685
hsa-miR-1307-5p	0	0	0	0	0	0	-68.632	-6.10081	0.465534	0.972685
hsa-miR-151b	0	0	0	0	0	0	-15.6287	-3.96612	0.628499	0.972685
hsa-miR-151a-5p	6607.45	2759.92	6147.08	2825.01	0	2858.41	-1.78283	-0.834167	0.595834	0.972685
hsa-miR-127-3p	213416	71147.9	23353.3	147372	69284.7	67904.7	2.62843	1.3942	0.161441	0.972685
hsa-miR-542-5p	1103.33	0	0	0	0	0	-288.729	-8.17357	0.323098	0.972685
hsa-miR-187-3p	0	0	0	0	0	0	-60.1176	-5.90972	0.47674	0.972685
hsa-miR-342-3p	3.13446	9.3875	5.63952	0	0	0	-1191.07	-10.218	0.205537	0.972685
hsa-miR-4685-3p	0	0	0	0	0	0	-1.26401	-0.338003	0.965992	0.972685
hsa-miR-3615	0	0	0	0	0	0	-1.26389	-0.337868	0.96601	0.972685
hsa-miR-330-5p	0	9.3875	0	0	0	0	-5.54981	-2.47244	0.757819	0.972685
hsa-miR-149-5p	1727.09	9.3875	0	1506.67	0	0	1.79077	0.840583	0.655848	0.972685
hsa-miR-942-5p	0	0	0	31.389	131.221	0	1.33071	0.412193	0.885464	0.972685
hsa-miR-432-5p	6.26893	9.3875	0	0	0	0	-885.854	-9.79093	0.229889	0.972685
hsa-miR-9-5p	0	0	0	0	0	0	-7.60022	-2.92604	0.716794	0.972685
hsa-miR-494-3p	0	0	0	0	0	0	-4.96929	-2.31304	0.772446	0.972685
hsa-miR-29c-5p	0	9.3875	0	0	0	0	-193.598	-7.59692	0.360875	0.972685
hsa-miR-146b-5p	12.5379	0	11.279	0	0	0	-23.7037	-4.56704	0.578063	0.972685
hsa-miR-769-5p	0	0	0	0	0	0	-1.26389	-0.337868	0.966045	0.972685
hsa-miR-339-3p	611.221	0	0	0	0	0	-15.9987	-3.99988	0.626472	0.972685
hsa-miR-1827	0	0	0	0	0	0	-1.26334	-0.337243	0.966001	0.972685
hsa-miR-4510	28.2102	18.775	78.9533	94.1671	0	139.435	2.97786	1.57428	0.452789	0.972685
hsa-miR-423-5p	608.086	0	1359.12	0	0	0	-389.465	-8.60535	0.29	0.972685
hsa-let-7e-5p	2238.01	1502	4302.96	12398.7	131.221	16197.7	3.6115	1.8526	0.283969	0.972685
hsa-miR-98-5p	3441.64	3642.35	18243.9	7910.04	131.221	2370.39	1.26361	0.337556	0.820462	0.972685
hsa-let-7f-5p	12036.3	12964.1	69529.7	45482.7	58262.1	41365.7	1.48175	0.567304	0.564015	0.972685
hsa-let-7c-5p	6949.11	9162.2	37384.4	14344.8	58918.2	67230.8	2.88247	1.52731	0.167133	0.972685
hsa-let-7i-5p	65115.4	50279.4	70967.7	22757.1	393.663	27166.5	-1.55457	-0.63652	0.618532	0.972685
hsa-miR-496	0	0	0	0	0	0	-77.5074	-6.27626	0.447243	0.972685
hsa-miR-574-5p	2269.35	0	3107.38	4551.41	0	6274.57	2.9148	1.5434	0.381062	0.972685
hsa-miR-190a-5p	0	0	0	0	0	0	-1.26334	-0.337243	0.966001	0.972685
hsa-miR-190b-5p	0	9.3875	1911.8	0	0	0	-6.20919	-2.63441	0.743628	0.972685
hsa-miR-3177-3p	0	0	0	0	0	0	-1.26401	-0.338003	0.965968	0.972685
hsa-miR-7112-3p	0	0	0	0	0	0	-1.26389	-0.337868	0.966073	0.972685
hsa-miR-3173-5p	3.13446	0	0	0	0	0	-4.20531	-2.07221	0.793226	0.972685
hsa-miR-24-1-5p	0	0	0	0	0	0	-4.79722	-2.2622	0.776228	0.972685
hsa-miR-214-5p	0	9.3875	0	0	0	0	-58.9924	-5.88246	0.479197	0.972685
hsa-miR-744-5p	0	0	0	0	0	23.2391	-4.68671	-2.22857	0.444365	0.972685
hsa-miR-31-3p	3.13446	9.3875	0	62.7781	0	0	-2.57682	-1.36559	0.616718	0.972685
hsa-miR-7-5p	7641.82	13593.1	10574.1	69872	0	5042.89	4.97334	2.31422	0.196488	0.972685
hsa-miR-1-3p	0	37.55	778.254	0	0	0	-516.222	-9.01185	0.268535	0.972685
hsa-miR-206	0	0	0	0	0	0	-226.829	-7.82546	0.350589	0.972685
hsa-miR-184	0	0	0	0	0	0	-63.8686	-5.99704	0.468991	0.972685
hsa-miR-139-3p	1702.01	1595.87	1218.14	0	0	0	-470.425	-8.87782	0.280456	0.972685
hsa-miR-185-5p	3.13446	46.9375	11.279	0	0	0	-494.067	-8.94856	0.26723	0.972685
hsa-miR-122-5p	1579.77	2741.15	135.349	0	0	0	-736.483	-9.52451	0.235791	0.972685
hsa-miR-1290	0	0	0	0	0	0	-238.458	-7.89759	0.34572	0.972685
hsa-miR-449a	0	0	0	31.389	0	0	-5.8955	-2.55961	0.413709	0.972685
hsa-miR-24-3p	40368.8	9049.55	12970.9	10640.9	131.221	7436.52	-2.3414	-1.22737	0.46015	0.972685
hsa-miR-1292-5p	0	0	0	0	0	0	-1.26334	-0.337243	0.966001	0.972685
hsa-miR-193a-5p	620.624	0	0	0	0	0	-7.14658	-2.83725	0.722334	0.972685
hsa-miR-23b-5p	0	0	0	0	0	0	-4.94021	-2.30457	0.771972	0.972685
hsa-miR-629-5p	0	0	0	0	0	0	-73.0932	-6.19167	0.459454	0.972685
hsa-miR-379-5p	940.339	0	0	3421.41	0	0	-1.67946	-0.747998	0.71796	0.972685
hsa-miR-412-5p	0	0	0	0	0	0	-74.3094	-6.21547	0.456237	0.972685
hsa-miR-299-5p	3.13446	0	0	0	0	0	-8.3125	-3.05528	0.706036	0.972685
hsa-miR-30d-5p	3.13446	9.3875	5.63952	0	918.547	46.4783	-1.75999	-0.815568	0.660798	0.972685
hsa-miR-30c-5p	0	18.775	0	0	0	0	-644.828	-9.33277	0.250931	0.972685
hsa-miR-30a-5p	0	0	936.161	0	0	0	-212.96	-7.73444	0.356112	0.972685
hsa-miR-30e-5p	0	0	0	0	0	0	-34.1818	-5.09516	0.539403	0.972685
hsa-miR-194-5p	0	0	0	0	0	0	-90.8893	-6.50604	0.435013	0.972685
hsa-miR-142-3p	0	0	0	0	0	0	-5.87438	-2.55444	0.7508	0.972685
hsa-miR-668-3p	0	0	0	0	0	0	-4.94021	-2.30457	0.772015	0.972685
hsa-miR-431-5p	6.26893	0	0	0	0	0	-233.478	-7.86714	0.341121	0.972685
hsa-miR-542-3p	0	0	0	0	0	0	-7.60022	-2.92604	0.716856	0.972685
hsa-miR-134-5p	0	0	0	31.389	0	0	-2.11773	-1.08252	0.723755	0.972685
hsa-miR-19b-3p	6.26893	18.775	0	31.389	0	0	-10.3691	-3.37421	0.222334	0.972685
hsa-miR-19a-3p	0	0	0	0	0	0	-9.39238	-3.23149	0.689932	0.972685
hsa-miR-636	0	28.1625	0	0	0	0	-2.94651	-1.55901	0.843807	0.972685
hsa-miR-3613-5p	0	0	0	0	0	0	-35.1719	-5.13635	0.532418	0.972685
hsa-miR-6755-3p	0	0	0	0	0	0	-74.2085	-6.21351	0.458672	0.972685
hsa-miR-499a-5p	0	0	0	0	0	0	-7.24731	-2.85744	0.723694	0.972685
hsa-miR-889-3p	626.893	0	0	0	0	0	-93.1688	-6.54177	0.432297	0.972685
hsa-miR-155-5p	5325.45	6421.05	14301.8	4896.69	0	2579.54	3.49573	1.80559	0.307577	0.972685
hsa-miR-582-5p	683.313	0	5.63952	0	0	0	-30.1508	-4.91412	0.553149	0.972685
hsa-miR-1296-5p	0	0	0	0	0	0	-2.51021	-1.32781	0.867081	0.972685
hsa-miR-340-5p	0	9.3875	0	0	0	0	-337.706	-8.39962	0.306592	0.972685
hsa-miR-361-5p	3.13446	0	0	31.389	0	0	-2.68676	-1.42587	0.63479	0.972685
hsa-miR-584-5p	0	0	5.63952	0	0	0	-1.26401	-0.338003	0.965941	0.972685
hsa-miR-137-3p	0	0	0	0	0	0	-28.4788	-4.83182	0.556371	0.972685
hsa-miR-9985	6.26893	0	0	0	0	0	-18.3929	-4.20107	0.606599	0.972685
hsa-miR-27a-3p	24859.4	3135.42	1037.67	4080.57	0	46.4783	-5.74147	-2.52142	0.169912	0.972685
hsa-miR-27b-3p	5337.99	150.2	2114.82	4017.8	393.663	0	-2.74875	-1.45878	0.411062	0.972685
hsa-miR-197-3p	3.13446	37.55	885.405	125.556	131.221	139.435	-1.43575	-0.521804	0.734714	0.972685
hsa-miR-204-5p	5196.94	15020	14815	14941.2	131.221	0	-1.8519	-0.889008	0.643614	0.972685
hsa-miR-211-5p	3.13446	0	45.1162	0	0	0	-24.3341	-4.60491	0.571263	0.972685
hsa-miR-202-5p	0	9.3875	0	0	0	0	-269.318	-8.07317	0.325339	0.972685
hsa-miR-203b-3p	0	0	0	0	0	0	-6.55079	-2.71167	0.737248	0.972685
hsa-miR-1301-3p	0	0	0	0	0	0	-1.26334	-0.337243	0.966001	0.972685
hsa-miR-153-3p	0	0	0	0	0	0	-4.94021	-2.30457	0.771707	0.972685
hsa-miR-3064-3p	0	0	0	0	0	0	-1.99919	-0.999416	0.899123	0.972685
hsa-miR-2110	0	159.587	11.279	0	0	0	-18.4257	-4.20365	0.602673	0.972685
hsa-miR-218-5p	3.13446	0	5.63952	31.389	0	23.2391	-9.96483	-3.31685	0.184868	0.972685
hsa-miR-592	0	0	0	0	0	0	-4.79722	-2.2622	0.776312	0.972685
hsa-miR-1180-3p	802.423	1361.19	11.279	2636.68	0	69.7174	2.11267	1.07907	0.597301	0.972685
hsa-miR-670-3p	0	0	0	0	0	0	-4.79722	-2.2622	0.776394	0.972685
hsa-miR-6516-5p	0	0	0	0	0	0	-3.47018	-1.79501	0.821121	0.972685
hsa-miR-182-5p	3.13446	0	5.63952	0	0	0	-8.96021	-3.16353	0.694195	0.972685
hsa-miR-96-5p	0	0	0	0	0	0	-5.87438	-2.55444	0.750883	0.972685
hsa-miR-133a-3p	0	0	0	0	0	0	-9.03119	-3.17492	0.695339	0.972685
hsa-miR-758-3p	0	0	0	0	0	0	-1.26389	-0.337868	0.966098	0.972685
hsa-miR-450b-5p	0	0	0	0	0	0	-4.96929	-2.31304	0.77252	0.972685
hsa-miR-450a-5p	0	0	0	0	0	0	-149.563	-7.22461	0.385381	0.972685
hsa-miR-335-3p	0	0	0	0	0	0	-4.20531	-2.07221	0.793314	0.972685
hsa-miR-30d-3p	0	9.3875	0	31.389	0	0	1.0451	0.0636379	0.98163	0.986082
hsa-let-7g-5p	7494.5	13611.9	23584.5	13371.7	131.221	18823.7	-1.01258	-0.0180317	0.990803	0.993044
hsa-miR-486-5p	28.2102	413.05	73.3138	62.7781	262.442	0	-1.01324	-0.018983	0.993836	0.993836
hsa-miR-548ap-3p	0	0	0	0	0	0	#N/A	#N/A	#N/A	#N/A
hsa-miR-548t-3p	0	0	0	0	0	0	#N/A	#N/A	#N/A	#N/A
hsa-miR-548e-3p	0	0	0	0	0	0	#N/A	#N/A	#N/A	#N/A
hsa-miR-548az-3p	0	0	0	0	0	0	#N/A	#N/A	#N/A	#N/A
hsa-miR-548f-3p	0	0	0	0	0	0	#N/A	#N/A	#N/A	#N/A
hsa-miR-548bc	0	0	0	0	0	0	#N/A	#N/A	#N/A	#N/A
hsa-miR-1537-3p	0	0	0	0	0	0	#N/A	#N/A	#N/A	#N/A
hsa-miR-553	0	0	0	0	0	0	#N/A	#N/A	#N/A	#N/A
hsa-miR-7844-5p	0	0	0	0	0	0	#N/A	#N/A	#N/A	#N/A
hsa-miR-548av-3p	0	0	0	0	0	0	#N/A	#N/A	#N/A	#N/A
hsa-miR-548g-3p	0	0	0	0	0	0	#N/A	#N/A	#N/A	#N/A
hsa-miR-6835-3p	0	0	0	0	0	0	#N/A	#N/A	#N/A	#N/A
hsa-miR-4422	0	0	0	0	0	0	#N/A	#N/A	#N/A	#N/A
hsa-miR-320d	0	0	0	0	0	0	#N/A	#N/A	#N/A	#N/A
hsa-miR-548an	0	0	0	0	0	0	#N/A	#N/A	#N/A	#N/A
hsa-miR-4484	0	0	0	0	0	0	#N/A	#N/A	#N/A	#N/A
hsa-miR-10526-3p	0	0	0	0	0	0	#N/A	#N/A	#N/A	#N/A
hsa-miR-548bb-5p	0	0	0	0	0	0	#N/A	#N/A	#N/A	#N/A
hsa-miR-548ak	0	0	0	0	0	0	#N/A	#N/A	#N/A	#N/A
hsa-miR-548w	0	0	0	0	0	0	#N/A	#N/A	#N/A	#N/A
hsa-miR-548y	0	0	0	0	0	0	#N/A	#N/A	#N/A	#N/A
hsa-miR-548h-5p	0	0	0	0	0	0	#N/A	#N/A	#N/A	#N/A
hsa-miR-548ar-5p	0	0	0	0	0	0	#N/A	#N/A	#N/A	#N/A
hsa-miR-548a-5p	0	0	0	0	0	0	#N/A	#N/A	#N/A	#N/A
hsa-miR-548i	0	0	0	0	0	0	#N/A	#N/A	#N/A	#N/A
hsa-miR-548as-5p	0	0	0	0	0	0	#N/A	#N/A	#N/A	#N/A
hsa-miR-548ap-5p	0	0	0	0	0	0	#N/A	#N/A	#N/A	#N/A
hsa-miR-548j-5p	0	0	0	0	0	0	#N/A	#N/A	#N/A	#N/A
hsa-miR-548au-5p	0	0	0	0	0	0	#N/A	#N/A	#N/A	#N/A
hsa-miR-548c-5p	0	0	0	0	0	0	#N/A	#N/A	#N/A	#N/A
hsa-miR-548ab	3.13446	0	0	0	0	0	#N/A	#N/A	#N/A	#N/A
hsa-miR-548b-5p	0	0	0	0	0	0	#N/A	#N/A	#N/A	#N/A
hsa-miR-548ad-5p	0	0	0	0	0	0	#N/A	#N/A	#N/A	#N/A
hsa-miR-548ay-5p	0	0	0	0	0	0	#N/A	#N/A	#N/A	#N/A
hsa-miR-548d-5p	0	0	0	0	0	0	#N/A	#N/A	#N/A	#N/A
hsa-miR-548av-5p	0	0	0	0	0	0	#N/A	#N/A	#N/A	#N/A
hsa-miR-548l	0	0	0	0	0	0	#N/A	#N/A	#N/A	#N/A
hsa-miR-548ah-5p	0	0	0	0	0	0	#N/A	#N/A	#N/A	#N/A
hsa-miR-106a-5p	0	0	0	0	0	0	#N/A	#N/A	#N/A	#N/A
hsa-miR-548at-5p	0	0	0	0	0	0	#N/A	#N/A	#N/A	#N/A
hsa-miR-3646	0	0	0	0	0	0	#N/A	#N/A	#N/A	#N/A
hsa-miR-224-3p	0	0	0	0	0	0	#N/A	#N/A	#N/A	#N/A
hsa-miR-522-3p	0	0	0	0	0	0	#N/A	#N/A	#N/A	#N/A
hsa-miR-3606-3p	0	0	0	0	0	0	#N/A	#N/A	#N/A	#N/A
hsa-miR-122b-3p	0	0	0	0	0	0	#N/A	#N/A	#N/A	#N/A
hsa-miR-649	0	0	0	0	0	0	#N/A	#N/A	#N/A	#N/A
hsa-miR-5583-5p	0	0	0	0	0	0	#N/A	#N/A	#N/A	#N/A
hsa-miR-3129-3p	0	0	0	0	0	0	#N/A	#N/A	#N/A	#N/A
hsa-miR-606	0	0	0	0	0	0	#N/A	#N/A	#N/A	#N/A
hsa-miR-618	0	0	0	0	0	0	#N/A	#N/A	#N/A	#N/A
hsa-miR-641	0	0	0	0	0	0	#N/A	#N/A	#N/A	#N/A
hsa-miR-3617-5p	0	0	0	0	0	0	#N/A	#N/A	#N/A	#N/A
hsa-miR-3667-5p	0	0	0	0	0	0	#N/A	#N/A	#N/A	#N/A
hsa-miR-548ao-3p	0	0	0	0	0	0	#N/A	#N/A	#N/A	#N/A
hsa-miR-4432	0	0	0	0	0	0	#N/A	#N/A	#N/A	#N/A
hsa-miR-4662a-3p	0	0	0	0	0	0	#N/A	#N/A	#N/A	#N/A
hsa-miR-3156-5p	0	0	0	0	0	0	#N/A	#N/A	#N/A	#N/A
hsa-miR-4662b	0	0	0	0	0	0	#N/A	#N/A	#N/A	#N/A
hsa-miR-10527-5p	0	0	0	0	0	0	#N/A	#N/A	#N/A	#N/A
hsa-miR-498-3p	0	0	0	0	0	0	#N/A	#N/A	#N/A	#N/A
hsa-miR-518e-3p	0	0	0	0	0	0	#N/A	#N/A	#N/A	#N/A
hsa-miR-320e	0	0	0	0	0	0	#N/A	#N/A	#N/A	#N/A
hsa-miR-651-3p	0	0	0	0	0	0	#N/A	#N/A	#N/A	#N/A
hsa-miR-3173-3p	0	0	0	0	0	0	#N/A	#N/A	#N/A	#N/A
hsa-miR-541-5p	0	0	0	0	0	0	#N/A	#N/A	#N/A	#N/A
hsa-miR-3910	0	0	0	0	0	0	#N/A	#N/A	#N/A	#N/A
hsa-miR-548ba	0	0	0	0	0	0	#N/A	#N/A	#N/A	#N/A
hsa-miR-570-5p	0	0	0	0	0	0	#N/A	#N/A	#N/A	#N/A
hsa-miR-548ag	0	0	0	0	0	0	#N/A	#N/A	#N/A	#N/A
hsa-miR-3974	0	0	0	0	0	0	#N/A	#N/A	#N/A	#N/A
hsa-miR-4735-3p	0	0	0	0	0	0	#N/A	#N/A	#N/A	#N/A
hsa-miR-562	0	0	0	0	0	0	#N/A	#N/A	#N/A	#N/A
hsa-miR-3184-3p	0	0	0	0	0	0	#N/A	#N/A	#N/A	#N/A
hsa-miR-519b-3p	0	0	0	0	0	0	#N/A	#N/A	#N/A	#N/A
hsa-miR-519a-3p	0	0	0	0	0	0	#N/A	#N/A	#N/A	#N/A
hsa-miR-519c-3p	0	0	0	0	0	0	#N/A	#N/A	#N/A	#N/A
hsa-miR-372-3p	0	0	0	0	0	0	#N/A	#N/A	#N/A	#N/A
hsa-miR-520a-3p	0	0	0	0	0	0	#N/A	#N/A	#N/A	#N/A
hsa-miR-520b-3p	0	0	0	0	0	0	#N/A	#N/A	#N/A	#N/A
hsa-miR-520c-3p	0	0	0	0	0	0	#N/A	#N/A	#N/A	#N/A
hsa-miR-520e-3p	0	0	0	0	0	0	#N/A	#N/A	#N/A	#N/A
hsa-miR-520d-3p	0	0	0	0	0	0	#N/A	#N/A	#N/A	#N/A
hsa-miR-1277-5p	0	0	0	0	0	0	#N/A	#N/A	#N/A	#N/A
hsa-miR-4517	0	0	0	0	0	0	#N/A	#N/A	#N/A	#N/A
hsa-miR-216b-5p	0	0	0	0	0	0	#N/A	#N/A	#N/A	#N/A
hsa-miR-4506	0	0	0	0	0	0	#N/A	#N/A	#N/A	#N/A
hsa-miR-513b-3p	0	0	0	0	0	0	#N/A	#N/A	#N/A	#N/A
hsa-miR-944	0	0	0	0	0	0	#N/A	#N/A	#N/A	#N/A
hsa-miR-4760-3p	0	0	0	0	0	0	#N/A	#N/A	#N/A	#N/A
hsa-miR-3529-3p	0	0	0	0	0	0	#N/A	#N/A	#N/A	#N/A
hsa-miR-338-5p	0	0	0	0	0	0	#N/A	#N/A	#N/A	#N/A
hsa-miR-6757-3p	0	0	0	0	0	0	#N/A	#N/A	#N/A	#N/A
hsa-miR-552-3p	0	0	0	0	0	0	#N/A	#N/A	#N/A	#N/A
hsa-miR-499a-3p	0	0	0	0	0	0	#N/A	#N/A	#N/A	#N/A
hsa-miR-499b-3p	0	0	0	0	0	0	#N/A	#N/A	#N/A	#N/A
hsa-miR-1255b-2-3p	0	0	0	0	0	0	#N/A	#N/A	#N/A	#N/A
hsa-miR-634	0	0	0	0	0	0	#N/A	#N/A	#N/A	#N/A
hsa-miR-4482-5p	0	0	0	0	0	0	#N/A	#N/A	#N/A	#N/A
hsa-miR-5195-5p	0	0	0	0	0	0	#N/A	#N/A	#N/A	#N/A
hsa-miR-6813-3p	0	0	0	0	0	0	#N/A	#N/A	#N/A	#N/A
hsa-miR-521	0	0	0	0	0	0	#N/A	#N/A	#N/A	#N/A
hsa-miR-122-3p	0	0	0	0	0	0	#N/A	#N/A	#N/A	#N/A
hsa-miR-548al	0	0	0	0	0	0	#N/A	#N/A	#N/A	#N/A
hsa-miR-4681	0	0	0	0	0	0	#N/A	#N/A	#N/A	#N/A
hsa-miR-4661-5p	0	0	0	0	0	0	#N/A	#N/A	#N/A	#N/A
hsa-miR-3923	0	0	0	0	0	0	#N/A	#N/A	#N/A	#N/A
hsa-miR-4798-3p	0	0	0	0	0	0	#N/A	#N/A	#N/A	#N/A
hsa-miR-3145-5p	0	0	0	0	0	0	#N/A	#N/A	#N/A	#N/A
hsa-miR-4636	0	0	0	0	0	0	#N/A	#N/A	#N/A	#N/A
hsa-miR-5684	0	0	0	0	0	0	#N/A	#N/A	#N/A	#N/A
hsa-miR-4714-5p	0	0	0	0	0	0	#N/A	#N/A	#N/A	#N/A
hsa-miR-3664-5p	0	0	0	0	0	0	#N/A	#N/A	#N/A	#N/A
hsa-miR-4724-5p	0	0	0	0	0	0	#N/A	#N/A	#N/A	#N/A
hsa-miR-1243	0	0	0	0	0	0	#N/A	#N/A	#N/A	#N/A
hsa-miR-452-5p	0	0	0	0	0	0	#N/A	#N/A	#N/A	#N/A
hsa-miR-5197-3p	0	0	0	0	0	0	#N/A	#N/A	#N/A	#N/A
hsa-miR-483-5p	0	0	0	0	0	0	#N/A	#N/A	#N/A	#N/A
hsa-miR-4499	0	0	0	0	0	0	#N/A	#N/A	#N/A	#N/A
hsa-miR-3925-5p	0	0	0	0	0	0	#N/A	#N/A	#N/A	#N/A
hsa-miR-6856-5p	0	0	0	0	0	0	#N/A	#N/A	#N/A	#N/A
hsa-miR-3916	0	0	0	0	0	0	#N/A	#N/A	#N/A	#N/A
hsa-miR-576-3p	0	0	0	0	0	0	#N/A	#N/A	#N/A	#N/A
hsa-miR-3942-5p	0	0	0	0	0	0	#N/A	#N/A	#N/A	#N/A
hsa-miR-6838-5p	0	0	0	0	0	0	#N/A	#N/A	#N/A	#N/A
hsa-miR-646	0	0	0	0	0	0	#N/A	#N/A	#N/A	#N/A
hsa-miR-1179	0	0	0	0	0	0	#N/A	#N/A	#N/A	#N/A
hsa-miR-6779-3p	0	0	0	0	0	0	#N/A	#N/A	#N/A	#N/A
hsa-miR-129-1-3p	0	0	0	0	0	0	#N/A	#N/A	#N/A	#N/A
hsa-miR-596	0	0	0	0	0	0	#N/A	#N/A	#N/A	#N/A
hsa-miR-4670-5p	0	0	0	0	0	0	#N/A	#N/A	#N/A	#N/A
hsa-miR-6854-5p	0	0	0	0	0	0	#N/A	#N/A	#N/A	#N/A
hsa-miR-208b-5p	0	0	0	0	0	0	#N/A	#N/A	#N/A	#N/A
hsa-miR-3914	0	0	0	0	0	0	#N/A	#N/A	#N/A	#N/A
hsa-miR-6888-5p	0	0	0	0	0	0	#N/A	#N/A	#N/A	#N/A
hsa-miR-940	0	0	0	0	0	0	#N/A	#N/A	#N/A	#N/A
hsa-miR-3142	0	0	0	0	0	0	#N/A	#N/A	#N/A	#N/A
hsa-miR-9500	0	0	0	0	0	0	#N/A	#N/A	#N/A	#N/A
hsa-miR-7845-5p	0	0	0	0	0	0	#N/A	#N/A	#N/A	#N/A
hsa-miR-4739	0	0	0	0	0	0	#N/A	#N/A	#N/A	#N/A
hsa-miR-3158-3p	0	0	0	0	0	0	#N/A	#N/A	#N/A	#N/A
hsa-miR-6743-5p	0	0	0	0	0	0	#N/A	#N/A	#N/A	#N/A
hsa-miR-6085	0	0	0	0	0	0	#N/A	#N/A	#N/A	#N/A
hsa-miR-4716-3p	0	0	0	0	0	0	#N/A	#N/A	#N/A	#N/A
hsa-miR-4678	0	0	0	0	0	0	#N/A	#N/A	#N/A	#N/A
hsa-miR-4464	0	0	0	0	0	0	#N/A	#N/A	#N/A	#N/A
hsa-miR-1244	0	0	0	0	0	0	#N/A	#N/A	#N/A	#N/A
hsa-miR-5588-3p	0	0	0	0	0	0	#N/A	#N/A	#N/A	#N/A
hsa-miR-6838-3p	0	0	0	0	0	0	#N/A	#N/A	#N/A	#N/A
hsa-miR-1245a	0	0	0	0	0	0	#N/A	#N/A	#N/A	#N/A
hsa-miR-371b-3p	0	0	0	0	0	0	#N/A	#N/A	#N/A	#N/A
hsa-miR-519e-3p	0	0	0	0	0	0	#N/A	#N/A	#N/A	#N/A
hsa-miR-512-3p	0	0	0	0	0	0	#N/A	#N/A	#N/A	#N/A
hsa-miR-520f-3p	0	0	0	0	0	0	#N/A	#N/A	#N/A	#N/A
hsa-miR-648	0	0	0	0	0	0	#N/A	#N/A	#N/A	#N/A
hsa-miR-148b-5p	0	0	0	0	0	0	#N/A	#N/A	#N/A	#N/A
hsa-miR-4715-5p	0	0	0	0	0	0	#N/A	#N/A	#N/A	#N/A
hsa-miR-5590-3p	0	0	0	0	0	0	#N/A	#N/A	#N/A	#N/A
hsa-miR-5692b	0	0	0	0	0	0	#N/A	#N/A	#N/A	#N/A
hsa-miR-5692c	0	0	0	0	0	0	#N/A	#N/A	#N/A	#N/A
hsa-miR-7705	0	0	0	0	0	0	#N/A	#N/A	#N/A	#N/A
hsa-miR-1295b-3p	0	0	0	0	0	0	#N/A	#N/A	#N/A	#N/A
hsa-miR-5094	0	0	0	0	0	0	#N/A	#N/A	#N/A	#N/A
hsa-miR-96-3p	0	0	0	0	0	0	#N/A	#N/A	#N/A	#N/A
hsa-miR-5092	0	0	0	0	0	0	#N/A	#N/A	#N/A	#N/A
hsa-miR-4733-5p	0	0	0	0	0	0	#N/A	#N/A	#N/A	#N/A
hsa-miR-500b-5p	0	0	0	0	0	0	#N/A	#N/A	#N/A	#N/A
hsa-miR-5188	0	0	0	0	0	0	#N/A	#N/A	#N/A	#N/A
hsa-miR-3200-5p	0	0	0	0	0	0	#N/A	#N/A	#N/A	#N/A
hsa-miR-4712-3p	0	0	0	0	0	0	#N/A	#N/A	#N/A	#N/A
hsa-miR-1246	0	0	0	0	0	0	#N/A	#N/A	#N/A	#N/A
hsa-miR-889-5p	0	0	0	0	0	0	#N/A	#N/A	#N/A	#N/A
hsa-miR-4495	0	0	0	0	0	0	#N/A	#N/A	#N/A	#N/A
hsa-miR-3668	0	0	0	0	0	0	#N/A	#N/A	#N/A	#N/A
hsa-miR-4657	0	0	0	0	0	0	#N/A	#N/A	#N/A	#N/A
hsa-miR-4491	0	0	0	0	0	0	#N/A	#N/A	#N/A	#N/A
hsa-miR-4781-3p	0	0	0	0	0	0	#N/A	#N/A	#N/A	#N/A
hsa-miR-4307	0	0	0	0	0	0	#N/A	#N/A	#N/A	#N/A
hsa-miR-10399-5p	0	0	0	0	0	0	#N/A	#N/A	#N/A	#N/A
hsa-miR-3938	0	0	0	0	0	0	#N/A	#N/A	#N/A	#N/A
hsa-miR-4778-5p	0	0	0	0	0	0	#N/A	#N/A	#N/A	#N/A
hsa-miR-367-3p	0	0	0	0	0	0	#N/A	#N/A	#N/A	#N/A
hsa-miR-4699-3p	0	0	0	0	0	0	#N/A	#N/A	#N/A	#N/A
hsa-miR-5002-5p	0	0	0	0	0	0	#N/A	#N/A	#N/A	#N/A
hsa-miR-3613-3p	0	0	0	0	0	0	#N/A	#N/A	#N/A	#N/A
hsa-miR-3973	0	0	0	0	0	0	#N/A	#N/A	#N/A	#N/A
hsa-miR-520h	0	0	0	0	0	0	#N/A	#N/A	#N/A	#N/A
hsa-miR-520g-3p	0	0	0	0	0	0	#N/A	#N/A	#N/A	#N/A
hsa-miR-4709-5p	0	0	0	0	0	0	#N/A	#N/A	#N/A	#N/A
hsa-miR-4761-5p	0	0	0	0	0	0	#N/A	#N/A	#N/A	#N/A
hsa-miR-216b-3p	0	0	0	0	0	0	#N/A	#N/A	#N/A	#N/A
hsa-miR-3681-3p	0	0	0	0	0	0	#N/A	#N/A	#N/A	#N/A
hsa-miR-4717-3p	0	0	0	0	0	0	#N/A	#N/A	#N/A	#N/A
hsa-miR-6865-3p	0	0	0	0	0	0	#N/A	#N/A	#N/A	#N/A
hsa-miR-6760-3p	0	0	0	0	0	0	#N/A	#N/A	#N/A	#N/A
hsa-miR-6500-3p	0	0	0	0	0	0	#N/A	#N/A	#N/A	#N/A
hsa-miR-499b-5p	0	0	0	0	0	0	#N/A	#N/A	#N/A	#N/A
hsa-miR-6847-5p	0	0	0	0	0	0	#N/A	#N/A	#N/A	#N/A
hsa-miR-383-3p	0	0	0	0	0	0	#N/A	#N/A	#N/A	#N/A
hsa-miR-5685	0	0	0	0	0	0	#N/A	#N/A	#N/A	#N/A
hsa-miR-4433a-3p	0	0	0	0	0	0	#N/A	#N/A	#N/A	#N/A
hsa-miR-6715b-5p	0	0	0	0	0	0	#N/A	#N/A	#N/A	#N/A
hsa-miR-4514	0	0	0	0	0	0	#N/A	#N/A	#N/A	#N/A
hsa-miR-3937	0	0	0	0	0	0	#N/A	#N/A	#N/A	#N/A
hsa-miR-4441	0	0	0	0	0	0	#N/A	#N/A	#N/A	#N/A
hsa-miR-3918	0	0	0	0	0	0	#N/A	#N/A	#N/A	#N/A
hsa-miR-9900	0	0	0	0	0	0	#N/A	#N/A	#N/A	#N/A
hsa-miR-936	0	0	0	0	0	0	#N/A	#N/A	#N/A	#N/A
hsa-miR-622	0	0	0	0	0	0	#N/A	#N/A	#N/A	#N/A
hsa-miR-1-5p	0	0	0	0	0	0	#N/A	#N/A	#N/A	#N/A
hsa-miR-4793-5p	0	0	0	0	0	0	#N/A	#N/A	#N/A	#N/A
hsa-miR-6785-3p	0	0	0	0	0	0	#N/A	#N/A	#N/A	#N/A
hsa-miR-4317	0	0	0	0	0	0	#N/A	#N/A	#N/A	#N/A
hsa-miR-1250-3p	0	0	0	0	0	0	#N/A	#N/A	#N/A	#N/A
hsa-miR-3691-3p	0	0	0	0	0	0	#N/A	#N/A	#N/A	#N/A
hsa-miR-6849-3p	0	0	0	0	0	0	#N/A	#N/A	#N/A	#N/A
hsa-miR-4738-5p	0	0	0	0	0	0	#N/A	#N/A	#N/A	#N/A
hsa-miR-665	0	0	0	0	0	0	#N/A	#N/A	#N/A	#N/A
hsa-miR-4645-5p	0	0	0	0	0	0	#N/A	#N/A	#N/A	#N/A
hsa-miR-6837-5p	0	0	0	0	0	0	#N/A	#N/A	#N/A	#N/A
hsa-miR-4726-3p	0	0	0	0	0	0	#N/A	#N/A	#N/A	#N/A
hsa-miR-4286	0	0	0	0	0	0	#N/A	#N/A	#N/A	#N/A
hsa-miR-6840-5p	0	0	0	0	0	0	#N/A	#N/A	#N/A	#N/A
hsa-miR-6795-3p	0	0	0	0	0	0	#N/A	#N/A	#N/A	#N/A
hsa-miR-6801-3p	0	0	0	0	0	0	#N/A	#N/A	#N/A	#N/A
hsa-miR-7108-3p	0	0	0	0	0	0	#N/A	#N/A	#N/A	#N/A
hsa-miR-454-5p	0	0	0	0	0	0	#N/A	#N/A	#N/A	#N/A
hsa-miR-4655-3p	0	0	0	0	0	0	#N/A	#N/A	#N/A	#N/A
hsa-miR-4780	0	0	0	0	0	0	#N/A	#N/A	#N/A	#N/A
hsa-miR-6832-3p	0	0	0	0	0	0	#N/A	#N/A	#N/A	#N/A
hsa-miR-4671-5p	0	0	0	0	0	0	#N/A	#N/A	#N/A	#N/A
hsa-miR-4485-5p	0	0	0	0	0	0	#N/A	#N/A	#N/A	#N/A
hsa-miR-6827-3p	0	0	0	0	0	0	#N/A	#N/A	#N/A	#N/A
hsa-miR-1973	0	0	0	0	0	0	#N/A	#N/A	#N/A	#N/A
hsa-miR-660-3p	0	0	0	0	0	0	#N/A	#N/A	#N/A	#N/A
hsa-miR-10401-3p	0	0	0	0	0	0	#N/A	#N/A	#N/A	#N/A
hsa-miR-3140-5p	0	0	0	0	0	0	#N/A	#N/A	#N/A	#N/A
hsa-miR-544b	0	0	0	0	0	0	#N/A	#N/A	#N/A	#N/A
hsa-miR-4722-3p	0	0	0	0	0	0	#N/A	#N/A	#N/A	#N/A
hsa-miR-3690	0	0	0	0	0	0	#N/A	#N/A	#N/A	#N/A
hsa-miR-8073	0	0	0	0	0	0	#N/A	#N/A	#N/A	#N/A
hsa-miR-221-5p	0	0	0	0	0	0	#N/A	#N/A	#N/A	#N/A
hsa-miR-6742-3p	0	0	0	0	0	0	#N/A	#N/A	#N/A	#N/A
hsa-miR-4421	0	0	0	0	0	0	#N/A	#N/A	#N/A	#N/A
hsa-miR-3667-3p	0	0	0	0	0	0	#N/A	#N/A	#N/A	#N/A
hsa-miR-1248	0	0	0	0	0	0	#N/A	#N/A	#N/A	#N/A
hsa-miR-6841-3p	0	0	0	0	0	0	#N/A	#N/A	#N/A	#N/A
hsa-miR-1915-5p	0	0	0	0	0	0	#N/A	#N/A	#N/A	#N/A
hsa-miR-5091	0	0	0	0	0	0	#N/A	#N/A	#N/A	#N/A
hsa-miR-105-3p	0	0	0	0	0	0	#N/A	#N/A	#N/A	#N/A
hsa-miR-6075	0	0	0	0	0	0	#N/A	#N/A	#N/A	#N/A
hsa-miR-7112-5p	0	0	0	0	0	0	#N/A	#N/A	#N/A	#N/A
hsa-miR-6777-5p	0	0	0	0	0	0	#N/A	#N/A	#N/A	#N/A
hsa-miR-137-5p	0	0	0	0	0	0	#N/A	#N/A	#N/A	#N/A
hsa-miR-1250-5p	0	0	0	0	0	0	#N/A	#N/A	#N/A	#N/A
hsa-miR-1306-3p	0	0	0	0	0	0	#N/A	#N/A	#N/A	#N/A
hsa-miR-5707	0	0	0	0	0	0	#N/A	#N/A	#N/A	#N/A
hsa-miR-4509	0	0	0	0	0	0	#N/A	#N/A	#N/A	#N/A
hsa-miR-190b-3p	0	0	0	0	0	0	#N/A	#N/A	#N/A	#N/A
hsa-miR-616-5p	0	0	0	0	0	0	#N/A	#N/A	#N/A	#N/A
hsa-miR-371b-5p	0	0	0	0	0	0	#N/A	#N/A	#N/A	#N/A
hsa-miR-373-5p	0	0	0	0	0	0	#N/A	#N/A	#N/A	#N/A
hsa-miR-371a-5p	0	0	0	0	0	0	#N/A	#N/A	#N/A	#N/A
hsa-miR-4264	0	0	0	0	0	0	#N/A	#N/A	#N/A	#N/A
hsa-miR-6758-3p	0	0	0	0	0	0	#N/A	#N/A	#N/A	#N/A
hsa-miR-5695	0	9.3875	0	0	0	0	#N/A	#N/A	#N/A	#N/A
hsa-miR-766-3p	0	0	0	0	0	0	#N/A	#N/A	#N/A	#N/A
hsa-miR-3925-3p	0	0	0	0	0	0	#N/A	#N/A	#N/A	#N/A
hsa-miR-6814-3p	0	0	0	0	0	0	#N/A	#N/A	#N/A	#N/A
hsa-miR-4638-5p	0	0	0	0	0	0	#N/A	#N/A	#N/A	#N/A
hsa-miR-1251-5p	0	0	0	0	0	0	#N/A	#N/A	#N/A	#N/A
hsa-miR-5187-3p	0	0	0	0	0	0	#N/A	#N/A	#N/A	#N/A
hsa-miR-3660	0	0	0	0	0	0	#N/A	#N/A	#N/A	#N/A
hsa-miR-6751-3p	0	0	0	0	0	0	#N/A	#N/A	#N/A	#N/A
hsa-miR-3920	0	0	0	0	0	0	#N/A	#N/A	#N/A	#N/A
hsa-miR-93-3p	0	0	0	0	0	0	#N/A	#N/A	#N/A	#N/A
hsa-miR-6128	0	0	0	0	0	0	#N/A	#N/A	#N/A	#N/A
hsa-miR-378i	0	0	0	0	0	0	#N/A	#N/A	#N/A	#N/A
hsa-miR-378f	0	0	0	0	0	0	#N/A	#N/A	#N/A	#N/A
hsa-miR-378b	0	0	0	0	0	0	#N/A	#N/A	#N/A	#N/A
hsa-miR-378c	0	0	0	0	0	0	#N/A	#N/A	#N/A	#N/A
hsa-miR-378e	0	0	0	0	0	0	#N/A	#N/A	#N/A	#N/A
hsa-miR-378j	0	0	0	0	0	0	#N/A	#N/A	#N/A	#N/A
hsa-miR-6868-5p	0	0	0	0	0	0	#N/A	#N/A	#N/A	#N/A
hsa-miR-4799-3p	0	0	0	0	0	0	#N/A	#N/A	#N/A	#N/A
hsa-miR-5588-5p	0	0	0	0	0	0	#N/A	#N/A	#N/A	#N/A
hsa-miR-3176	0	0	0	0	0	0	#N/A	#N/A	#N/A	#N/A
hsa-miR-664a-5p	0	0	0	0	0	0	#N/A	#N/A	#N/A	#N/A
hsa-miR-4646-5p	0	0	0	0	0	0	#N/A	#N/A	#N/A	#N/A
hsa-miR-6506-5p	0	0	0	0	0	0	#N/A	#N/A	#N/A	#N/A
hsa-miR-6860	0	0	0	0	0	0	#N/A	#N/A	#N/A	#N/A
hsa-miR-378g	0	0	0	0	0	0	#N/A	#N/A	#N/A	#N/A
hsa-miR-4667-5p	0	0	0	0	0	0	#N/A	#N/A	#N/A	#N/A
hsa-miR-637	0	0	0	0	0	0	#N/A	#N/A	#N/A	#N/A
hsa-miR-6861-5p	0	0	0	0	0	0	#N/A	#N/A	#N/A	#N/A
hsa-miR-20b-3p	0	0	0	0	0	0	#N/A	#N/A	#N/A	#N/A
hsa-miR-6773-3p	0	0	0	0	0	0	#N/A	#N/A	#N/A	#N/A
hsa-miR-367-5p	0	0	0	0	0	0	#N/A	#N/A	#N/A	#N/A
hsa-miR-302a-5p	0	0	0	0	0	0	#N/A	#N/A	#N/A	#N/A
hsa-miR-600	0	0	0	0	0	0	#N/A	#N/A	#N/A	#N/A
hsa-miR-412-3p	0	0	0	0	0	0	#N/A	#N/A	#N/A	#N/A
hsa-miR-635	0	0	0	0	0	0	#N/A	#N/A	#N/A	#N/A
hsa-miR-6774-5p	0	0	0	0	0	0	#N/A	#N/A	#N/A	#N/A
hsa-miR-643	0	0	0	0	0	0	#N/A	#N/A	#N/A	#N/A
hsa-miR-302b-5p	0	0	0	0	0	0	#N/A	#N/A	#N/A	#N/A
hsa-miR-302d-5p	0	0	0	0	0	0	#N/A	#N/A	#N/A	#N/A
hsa-miR-3124-3p	0	0	0	0	0	0	#N/A	#N/A	#N/A	#N/A
hsa-miR-5681a	0	0	0	0	0	0	#N/A	#N/A	#N/A	#N/A
hsa-miR-6730-5p	0	0	0	0	0	0	#N/A	#N/A	#N/A	#N/A
hsa-miR-4680-5p	0	0	0	0	0	0	#N/A	#N/A	#N/A	#N/A
hsa-miR-3185	0	0	0	0	0	0	#N/A	#N/A	#N/A	#N/A
hsa-miR-10522-5p	0	0	0	0	0	0	#N/A	#N/A	#N/A	#N/A
hsa-miR-4699-5p	0	0	0	0	0	0	#N/A	#N/A	#N/A	#N/A
hsa-miR-1252-5p	0	0	0	0	0	0	#N/A	#N/A	#N/A	#N/A
hsa-miR-605-3p	0	0	0	0	0	0	#N/A	#N/A	#N/A	#N/A
hsa-miR-4493	0	0	0	0	0	0	#N/A	#N/A	#N/A	#N/A
hsa-miR-7515	0	0	0	0	0	0	#N/A	#N/A	#N/A	#N/A
hsa-miR-3179	0	0	0	0	0	0	#N/A	#N/A	#N/A	#N/A
hsa-miR-548ao-5p	0	0	0	0	0	0	#N/A	#N/A	#N/A	#N/A
hsa-miR-548ax	0	0	0	0	0	0	#N/A	#N/A	#N/A	#N/A
hsa-miR-4795-5p	0	0	0	0	0	0	#N/A	#N/A	#N/A	#N/A
hsa-miR-10393-5p	0	0	0	0	0	0	#N/A	#N/A	#N/A	#N/A
hsa-miR-219b-3p	0	0	0	0	0	0	#N/A	#N/A	#N/A	#N/A
hsa-miR-219a-2-3p	0	0	0	0	0	0	#N/A	#N/A	#N/A	#N/A
hsa-miR-642a-3p	0	0	0	0	0	0	#N/A	#N/A	#N/A	#N/A
hsa-miR-642b-3p	0	0	0	0	0	0	#N/A	#N/A	#N/A	#N/A
hsa-miR-3117-5p	0	0	0	0	0	0	#N/A	#N/A	#N/A	#N/A
hsa-miR-4645-3p	0	0	0	0	0	0	#N/A	#N/A	#N/A	#N/A
hsa-miR-3913-3p	0	0	0	0	0	0	#N/A	#N/A	#N/A	#N/A
hsa-miR-591	0	0	0	0	0	0	#N/A	#N/A	#N/A	#N/A
hsa-miR-4725-5p	0	0	0	0	0	0	#N/A	#N/A	#N/A	#N/A
hsa-miR-504-5p	0	0	0	0	0	0	#N/A	#N/A	#N/A	#N/A
hsa-miR-631	0	0	0	0	0	0	#N/A	#N/A	#N/A	#N/A
hsa-miR-6855-3p	0	0	0	0	0	0	#N/A	#N/A	#N/A	#N/A
hsa-miR-4513	0	0	0	0	0	0	#N/A	#N/A	#N/A	#N/A
hsa-miR-617	0	0	0	0	0	0	#N/A	#N/A	#N/A	#N/A
hsa-miR-1253	0	0	0	0	0	0	#N/A	#N/A	#N/A	#N/A
hsa-miR-6088	0	0	0	0	0	0	#N/A	#N/A	#N/A	#N/A
hsa-miR-4708-5p	0	0	0	0	0	0	#N/A	#N/A	#N/A	#N/A
hsa-miR-5186	0	0	0	0	0	0	#N/A	#N/A	#N/A	#N/A
hsa-miR-4468	0	0	0	0	0	0	#N/A	#N/A	#N/A	#N/A
hsa-miR-3670	0	0	0	0	0	0	#N/A	#N/A	#N/A	#N/A
hsa-miR-3160-3p	0	0	0	0	0	0	#N/A	#N/A	#N/A	#N/A
hsa-miR-4487	0	0	0	0	0	0	#N/A	#N/A	#N/A	#N/A
hsa-miR-4751	0	0	0	0	0	0	#N/A	#N/A	#N/A	#N/A
hsa-miR-1185-5p	0	0	0	0	0	0	#N/A	#N/A	#N/A	#N/A
hsa-miR-6884-5p	0	0	0	0	0	0	#N/A	#N/A	#N/A	#N/A
hsa-miR-3188	0	0	0	0	0	0	#N/A	#N/A	#N/A	#N/A
hsa-miR-4458	0	0	0	0	0	0	#N/A	#N/A	#N/A	#N/A
hsa-miR-655-5p	0	0	0	0	0	0	#N/A	#N/A	#N/A	#N/A
hsa-miR-4785	0	0	0	0	0	0	#N/A	#N/A	#N/A	#N/A
hsa-miR-924	0	0	0	0	0	0	#N/A	#N/A	#N/A	#N/A
hsa-miR-4424	0	0	0	0	0	0	#N/A	#N/A	#N/A	#N/A
hsa-miR-3145-3p	0	0	0	0	0	0	#N/A	#N/A	#N/A	#N/A
hsa-miR-383-5p	0	0	0	0	0	0	#N/A	#N/A	#N/A	#N/A
hsa-miR-3171	0	0	0	0	0	0	#N/A	#N/A	#N/A	#N/A
hsa-miR-219b-5p	0	0	0	0	0	0	#N/A	#N/A	#N/A	#N/A
hsa-miR-4445-5p	0	0	0	0	0	0	#N/A	#N/A	#N/A	#N/A
hsa-miR-1468-3p	0	0	0	0	0	0	#N/A	#N/A	#N/A	#N/A
hsa-miR-4708-3p	0	0	0	0	0	0	#N/A	#N/A	#N/A	#N/A
hsa-miR-8064	0	0	0	0	0	0	#N/A	#N/A	#N/A	#N/A
hsa-miR-298	0	0	0	0	0	0	#N/A	#N/A	#N/A	#N/A
hsa-miR-4771	0	0	0	0	0	0	#N/A	#N/A	#N/A	#N/A
hsa-miR-2467-3p	0	0	0	0	0	0	#N/A	#N/A	#N/A	#N/A
hsa-miR-6132	0	0	0	0	0	0	#N/A	#N/A	#N/A	#N/A
hsa-miR-3665	0	0	0	0	0	0	#N/A	#N/A	#N/A	#N/A
hsa-miR-6499-3p	0	0	0	0	0	0	#N/A	#N/A	#N/A	#N/A
hsa-miR-5689	0	0	0	0	0	0	#N/A	#N/A	#N/A	#N/A
hsa-miR-6076	0	0	0	0	0	0	#N/A	#N/A	#N/A	#N/A
hsa-miR-4480	0	0	0	0	0	0	#N/A	#N/A	#N/A	#N/A
hsa-miR-4755-3p	0	0	0	0	0	0	#N/A	#N/A	#N/A	#N/A
hsa-miR-4313	0	0	0	0	0	0	#N/A	#N/A	#N/A	#N/A
hsa-miR-210-5p	0	0	0	0	0	0	#N/A	#N/A	#N/A	#N/A
hsa-miR-4707-3p	0	0	0	0	0	0	#N/A	#N/A	#N/A	#N/A
hsa-miR-3648	0	0	0	0	0	0	#N/A	#N/A	#N/A	#N/A
hsa-miR-6743-3p	0	0	0	0	0	0	#N/A	#N/A	#N/A	#N/A
hsa-miR-6811-3p	0	0	0	0	0	0	#N/A	#N/A	#N/A	#N/A
hsa-miR-5581-5p	0	0	0	0	0	0	#N/A	#N/A	#N/A	#N/A
hsa-miR-2277-5p	0	0	0	0	0	0	#N/A	#N/A	#N/A	#N/A
hsa-miR-4706	0	0	0	0	0	0	#N/A	#N/A	#N/A	#N/A
hsa-miR-4746-3p	0	0	0	0	0	0	#N/A	#N/A	#N/A	#N/A
hsa-miR-6853-5p	0	0	0	0	0	0	#N/A	#N/A	#N/A	#N/A
hsa-miR-548v	0	0	0	0	0	0	#N/A	#N/A	#N/A	#N/A
hsa-miR-549a-5p	0	0	0	0	0	0	#N/A	#N/A	#N/A	#N/A
hsa-miR-7106-3p	0	0	0	0	0	0	#N/A	#N/A	#N/A	#N/A
hsa-miR-6502-5p	0	0	0	0	0	0	#N/A	#N/A	#N/A	#N/A
hsa-miR-3194-3p	0	0	0	0	0	0	#N/A	#N/A	#N/A	#N/A
hsa-miR-4663	0	0	0	0	0	0	#N/A	#N/A	#N/A	#N/A
hsa-miR-133a-5p	0	0	0	0	0	0	#N/A	#N/A	#N/A	#N/A
hsa-miR-1537-5p	0	0	0	0	0	0	#N/A	#N/A	#N/A	#N/A
hsa-miR-4718	0	0	0	0	0	0	#N/A	#N/A	#N/A	#N/A
hsa-miR-626	0	0	0	0	0	0	#N/A	#N/A	#N/A	#N/A
hsa-miR-6876-3p	0	0	0	0	0	0	#N/A	#N/A	#N/A	#N/A
hsa-miR-2115-5p	0	0	0	0	0	0	#N/A	#N/A	#N/A	#N/A
hsa-miR-3140-3p	0	0	0	0	0	0	#N/A	#N/A	#N/A	#N/A
hsa-miR-4261	0	0	0	0	0	0	#N/A	#N/A	#N/A	#N/A
hsa-miR-5093	0	0	0	0	0	0	#N/A	#N/A	#N/A	#N/A
hsa-miR-6828-5p	0	0	0	0	0	0	#N/A	#N/A	#N/A	#N/A
hsa-miR-613	0	0	0	0	0	0	#N/A	#N/A	#N/A	#N/A
hsa-miR-492	0	0	0	0	0	0	#N/A	#N/A	#N/A	#N/A
hsa-miR-659-5p	0	0	0	0	0	0	#N/A	#N/A	#N/A	#N/A
hsa-miR-4740-5p	0	0	0	0	0	0	#N/A	#N/A	#N/A	#N/A
hsa-miR-4515	0	0	0	0	0	0	#N/A	#N/A	#N/A	#N/A
hsa-miR-4434	0	0	0	0	0	0	#N/A	#N/A	#N/A	#N/A
hsa-miR-5703	0	0	0	0	0	0	#N/A	#N/A	#N/A	#N/A
hsa-miR-5192	0	0	0	0	0	0	#N/A	#N/A	#N/A	#N/A
hsa-miR-6081	0	0	0	0	0	0	#N/A	#N/A	#N/A	#N/A
hsa-miR-4633-3p	0	0	0	0	0	0	#N/A	#N/A	#N/A	#N/A
hsa-miR-6500-5p	0	0	0	0	0	0	#N/A	#N/A	#N/A	#N/A
hsa-miR-766-5p	0	0	0	0	0	0	#N/A	#N/A	#N/A	#N/A
hsa-miR-7154-3p	0	0	0	0	0	0	#N/A	#N/A	#N/A	#N/A
hsa-miR-11181-3p	0	0	0	0	0	0	#N/A	#N/A	#N/A	#N/A
hsa-miR-6894-5p	0	0	0	0	0	0	#N/A	#N/A	#N/A	#N/A
hsa-miR-650	0	0	0	0	0	0	#N/A	#N/A	#N/A	#N/A
hsa-miR-3612	0	0	0	0	0	0	#N/A	#N/A	#N/A	#N/A
hsa-miR-6797-5p	0	0	0	0	0	0	#N/A	#N/A	#N/A	#N/A
hsa-miR-1249-5p	0	0	0	0	0	0	#N/A	#N/A	#N/A	#N/A
hsa-miR-6851-5p	0	0	0	0	0	0	#N/A	#N/A	#N/A	#N/A
hsa-miR-5191	0	0	0	0	0	0	#N/A	#N/A	#N/A	#N/A
hsa-miR-1255a	0	0	0	0	0	0	#N/A	#N/A	#N/A	#N/A
hsa-miR-3167	0	0	0	0	0	0	#N/A	#N/A	#N/A	#N/A
hsa-miR-593-5p	0	0	0	0	0	0	#N/A	#N/A	#N/A	#N/A
hsa-miR-564	0	0	0	0	0	0	#N/A	#N/A	#N/A	#N/A
hsa-miR-885-3p	0	0	0	0	0	0	#N/A	#N/A	#N/A	#N/A
hsa-miR-4763-3p	0	0	0	0	0	0	#N/A	#N/A	#N/A	#N/A
hsa-miR-4736	0	0	0	0	0	0	#N/A	#N/A	#N/A	#N/A
hsa-miR-3622b-5p	0	0	0	0	0	0	#N/A	#N/A	#N/A	#N/A
hsa-miR-1256	0	0	0	0	0	0	#N/A	#N/A	#N/A	#N/A
hsa-miR-4529-5p	0	0	0	0	0	0	#N/A	#N/A	#N/A	#N/A
hsa-miR-6775-3p	0	0	0	0	0	0	#N/A	#N/A	#N/A	#N/A
hsa-miR-4757-5p	0	0	0	0	0	0	#N/A	#N/A	#N/A	#N/A
hsa-miR-6735-3p	0	0	0	0	0	0	#N/A	#N/A	#N/A	#N/A
hsa-miR-6717-5p	0	0	0	0	0	0	#N/A	#N/A	#N/A	#N/A
hsa-miR-6722-5p	0	0	0	0	0	0	#N/A	#N/A	#N/A	#N/A
hsa-miR-25-5p	0	0	0	0	0	0	#N/A	#N/A	#N/A	#N/A
hsa-miR-663a	0	0	0	0	0	0	#N/A	#N/A	#N/A	#N/A
hsa-miR-6822-3p	0	0	0	0	0	0	#N/A	#N/A	#N/A	#N/A
hsa-miR-604	0	0	0	0	0	0	#N/A	#N/A	#N/A	#N/A
hsa-miR-4430	0	0	0	0	0	0	#N/A	#N/A	#N/A	#N/A
hsa-miR-4505	0	0	0	0	0	0	#N/A	#N/A	#N/A	#N/A
hsa-miR-7974	0	0	0	0	0	0	#N/A	#N/A	#N/A	#N/A
hsa-miR-4668-5p	0	0	0	0	0	0	#N/A	#N/A	#N/A	#N/A
hsa-miR-4747-5p	0	0	0	0	0	0	#N/A	#N/A	#N/A	#N/A
hsa-miR-5196-5p	0	0	0	0	0	0	#N/A	#N/A	#N/A	#N/A
hsa-miR-3649	0	0	0	0	0	0	#N/A	#N/A	#N/A	#N/A
hsa-miR-92b-5p	0	0	0	0	0	0	#N/A	#N/A	#N/A	#N/A
hsa-miR-3199	0	0	0	0	0	0	#N/A	#N/A	#N/A	#N/A
hsa-miR-6878-5p	0	0	0	0	0	0	#N/A	#N/A	#N/A	#N/A
hsa-miR-149-3p	0	0	0	0	0	0	#N/A	#N/A	#N/A	#N/A
hsa-miR-6883-5p	0	0	0	0	0	0	#N/A	#N/A	#N/A	#N/A
hsa-miR-638	0	0	0	0	0	0	#N/A	#N/A	#N/A	#N/A
hsa-miR-3945	0	0	0	0	0	0	#N/A	#N/A	#N/A	#N/A
hsa-miR-4253	0	0	0	0	0	0	#N/A	#N/A	#N/A	#N/A
hsa-miR-4726-5p	0	0	0	0	0	0	#N/A	#N/A	#N/A	#N/A
hsa-miR-6877-5p	0	0	0	0	0	0	#N/A	#N/A	#N/A	#N/A
hsa-miR-5001-5p	0	0	0	0	0	0	#N/A	#N/A	#N/A	#N/A
hsa-miR-3144-5p	0	0	0	0	0	0	#N/A	#N/A	#N/A	#N/A
hsa-miR-4652-5p	0	0	0	0	0	0	#N/A	#N/A	#N/A	#N/A
hsa-miR-185-3p	0	0	0	0	0	0	#N/A	#N/A	#N/A	#N/A
hsa-miR-5010-5p	0	0	0	0	0	0	#N/A	#N/A	#N/A	#N/A
hsa-miR-4697-5p	0	0	0	0	0	0	#N/A	#N/A	#N/A	#N/A
hsa-miR-4488	0	0	0	0	0	0	#N/A	#N/A	#N/A	#N/A
hsa-miR-6885-5p	0	0	0	0	0	0	#N/A	#N/A	#N/A	#N/A
hsa-miR-6835-5p	0	0	0	0	0	0	#N/A	#N/A	#N/A	#N/A
hsa-miR-608	0	0	0	0	0	0	#N/A	#N/A	#N/A	#N/A
hsa-miR-6747-5p	0	0	0	0	0	0	#N/A	#N/A	#N/A	#N/A
hsa-miR-555	0	0	0	0	0	0	#N/A	#N/A	#N/A	#N/A
hsa-miR-6756-5p	0	0	0	0	0	0	#N/A	#N/A	#N/A	#N/A
hsa-miR-609	0	0	0	0	0	0	#N/A	#N/A	#N/A	#N/A
hsa-miR-4650-3p	0	0	0	0	0	0	#N/A	#N/A	#N/A	#N/A
hsa-miR-3529-5p	0	0	0	0	0	0	#N/A	#N/A	#N/A	#N/A
hsa-miR-5681b	0	0	0	0	0	0	#N/A	#N/A	#N/A	#N/A
hsa-miR-6503-5p	0	0	0	0	0	0	#N/A	#N/A	#N/A	#N/A
hsa-miR-3085-5p	0	0	0	0	0	0	#N/A	#N/A	#N/A	#N/A
hsa-miR-3907	0	0	0	0	0	0	#N/A	#N/A	#N/A	#N/A
hsa-miR-3165	0	0	0	0	0	0	#N/A	#N/A	#N/A	#N/A
hsa-miR-6769a-5p	0	0	0	0	0	0	#N/A	#N/A	#N/A	#N/A
hsa-miR-3650	0	0	0	0	0	0	#N/A	#N/A	#N/A	#N/A
hsa-miR-4694-5p	0	0	0	0	0	0	#N/A	#N/A	#N/A	#N/A
hsa-miR-152-5p	0	0	0	0	0	0	#N/A	#N/A	#N/A	#N/A
hsa-miR-563	0	0	0	0	0	0	#N/A	#N/A	#N/A	#N/A
hsa-miR-656-5p	0	0	0	0	0	0	#N/A	#N/A	#N/A	#N/A
hsa-miR-92a-1-5p	0	0	0	0	0	0	#N/A	#N/A	#N/A	#N/A
hsa-miR-323b-5p	0	0	0	0	0	0	#N/A	#N/A	#N/A	#N/A
hsa-miR-494-5p	0	0	0	0	0	0	#N/A	#N/A	#N/A	#N/A
hsa-miR-6832-5p	0	0	0	0	0	0	#N/A	#N/A	#N/A	#N/A
hsa-miR-567	0	0	0	0	0	0	#N/A	#N/A	#N/A	#N/A
hsa-miR-630	0	0	0	0	0	0	#N/A	#N/A	#N/A	#N/A
hsa-miR-616-3p	0	0	0	0	0	0	#N/A	#N/A	#N/A	#N/A
hsa-miR-1257	0	0	0	0	0	0	#N/A	#N/A	#N/A	#N/A
hsa-miR-550a-3-5p	0	0	0	0	0	0	#N/A	#N/A	#N/A	#N/A
hsa-miR-550a-5p	0	0	0	0	0	0	#N/A	#N/A	#N/A	#N/A
hsa-miR-1271-3p	0	0	0	0	0	0	#N/A	#N/A	#N/A	#N/A
hsa-miR-4800-5p	0	0	0	0	0	0	#N/A	#N/A	#N/A	#N/A
hsa-miR-3691-5p	0	0	0	0	0	0	#N/A	#N/A	#N/A	#N/A
hsa-miR-3688-5p	0	0	0	0	0	0	#N/A	#N/A	#N/A	#N/A
hsa-miR-891a-3p	0	0	0	0	0	0	#N/A	#N/A	#N/A	#N/A
hsa-miR-6778-5p	0	0	0	0	0	0	#N/A	#N/A	#N/A	#N/A
hsa-miR-1233-5p	0	0	0	0	0	0	#N/A	#N/A	#N/A	#N/A
hsa-miR-6742-5p	0	0	0	0	0	0	#N/A	#N/A	#N/A	#N/A
hsa-miR-203a-5p	0	0	0	0	0	0	#N/A	#N/A	#N/A	#N/A
hsa-miR-644a	0	0	0	0	0	0	#N/A	#N/A	#N/A	#N/A
hsa-miR-569	0	0	0	0	0	0	#N/A	#N/A	#N/A	#N/A
hsa-miR-1258	0	0	0	0	0	0	#N/A	#N/A	#N/A	#N/A
hsa-miR-6501-5p	0	0	0	0	0	0	#N/A	#N/A	#N/A	#N/A
hsa-miR-4423-5p	0	0	0	0	0	0	#N/A	#N/A	#N/A	#N/A
hsa-miR-6740-5p	0	0	0	0	0	0	#N/A	#N/A	#N/A	#N/A
hsa-miR-19b-2-5p	0	0	0	0	0	0	#N/A	#N/A	#N/A	#N/A
hsa-miR-19a-5p	0	0	0	0	0	0	#N/A	#N/A	#N/A	#N/A
hsa-miR-3143	0	0	0	0	0	0	#N/A	#N/A	#N/A	#N/A
hsa-miR-374c-5p	0	0	0	0	0	0	#N/A	#N/A	#N/A	#N/A
hsa-miR-655-3p	0	0	0	0	0	0	#N/A	#N/A	#N/A	#N/A
hsa-miR-466	0	0	0	0	0	0	#N/A	#N/A	#N/A	#N/A
hsa-miR-4666a-5p	0	0	0	0	0	0	#N/A	#N/A	#N/A	#N/A
hsa-miR-5591-3p	0	0	0	0	0	0	#N/A	#N/A	#N/A	#N/A
hsa-miR-4777-3p	0	0	0	0	0	0	#N/A	#N/A	#N/A	#N/A
hsa-miR-4693-5p	0	0	0	0	0	0	#N/A	#N/A	#N/A	#N/A
hsa-miR-4766-3p	0	0	0	0	0	0	#N/A	#N/A	#N/A	#N/A
hsa-miR-4524b-5p	0	0	0	0	0	0	#N/A	#N/A	#N/A	#N/A
hsa-miR-4524a-5p	0	0	0	0	0	0	#N/A	#N/A	#N/A	#N/A
hsa-miR-3117-3p	0	0	0	0	0	0	#N/A	#N/A	#N/A	#N/A
hsa-miR-4423-3p	0	0	0	0	0	0	#N/A	#N/A	#N/A	#N/A
hsa-miR-4727-3p	0	0	0	0	0	0	#N/A	#N/A	#N/A	#N/A
hsa-miR-4460	0	0	0	0	0	0	#N/A	#N/A	#N/A	#N/A
hsa-miR-1185-2-3p	0	0	0	0	0	0	#N/A	#N/A	#N/A	#N/A
hsa-miR-1185-1-3p	0	0	0	0	0	0	#N/A	#N/A	#N/A	#N/A
hsa-miR-3144-3p	0	0	0	0	0	0	#N/A	#N/A	#N/A	#N/A
hsa-miR-4633-5p	0	0	0	0	0	0	#N/A	#N/A	#N/A	#N/A
hsa-miR-3115	0	0	0	0	0	0	#N/A	#N/A	#N/A	#N/A
hsa-miR-3924	0	0	0	0	0	0	#N/A	#N/A	#N/A	#N/A
hsa-miR-556-3p	0	0	0	0	0	0	#N/A	#N/A	#N/A	#N/A
hsa-miR-4795-3p	0	0	0	0	0	0	#N/A	#N/A	#N/A	#N/A
hsa-miR-3671	0	0	0	0	0	0	#N/A	#N/A	#N/A	#N/A
hsa-miR-561-5p	0	0	0	0	0	0	#N/A	#N/A	#N/A	#N/A
hsa-miR-3127-5p	0	0	0	0	0	0	#N/A	#N/A	#N/A	#N/A
hsa-miR-539-3p	0	0	0	0	0	0	#N/A	#N/A	#N/A	#N/A
hsa-miR-5007-3p	0	0	0	0	0	0	#N/A	#N/A	#N/A	#N/A
hsa-miR-6516-3p	0	0	0	0	0	0	#N/A	#N/A	#N/A	#N/A
hsa-miR-5195-3p	0	0	0	0	0	0	#N/A	#N/A	#N/A	#N/A
hsa-miR-2355-5p	0	0	0	0	0	0	#N/A	#N/A	#N/A	#N/A
hsa-miR-623	0	0	0	0	0	0	#N/A	#N/A	#N/A	#N/A
hsa-miR-937-3p	0	0	0	0	0	0	#N/A	#N/A	#N/A	#N/A
hsa-miR-7111-3p	0	0	0	0	0	0	#N/A	#N/A	#N/A	#N/A
hsa-miR-6881-3p	0	0	0	0	0	0	#N/A	#N/A	#N/A	#N/A
hsa-miR-502-5p	0	0	0	0	0	0	#N/A	#N/A	#N/A	#N/A
hsa-miR-639	0	0	0	0	0	0	#N/A	#N/A	#N/A	#N/A
hsa-miR-4790-5p	0	0	0	0	0	0	#N/A	#N/A	#N/A	#N/A
hsa-miR-3181	0	0	0	0	0	0	#N/A	#N/A	#N/A	#N/A
hsa-miR-517a-3p	0	0	0	0	0	0	#N/A	#N/A	#N/A	#N/A
hsa-miR-517c-3p	0	0	0	0	0	0	#N/A	#N/A	#N/A	#N/A
hsa-miR-4799-5p	0	0	0	0	0	0	#N/A	#N/A	#N/A	#N/A
hsa-miR-4256	0	0	0	0	0	0	#N/A	#N/A	#N/A	#N/A
hsa-miR-4727-5p	0	0	0	0	0	0	#N/A	#N/A	#N/A	#N/A
hsa-miR-6828-3p	0	0	0	0	0	0	#N/A	#N/A	#N/A	#N/A
hsa-miR-516b-5p	0	0	0	0	0	0	#N/A	#N/A	#N/A	#N/A
hsa-miR-3686	0	0	0	0	0	0	#N/A	#N/A	#N/A	#N/A
hsa-miR-6888-3p	0	0	0	0	0	0	#N/A	#N/A	#N/A	#N/A
hsa-miR-7843-3p	0	0	0	0	0	0	#N/A	#N/A	#N/A	#N/A
hsa-miR-3616-5p	0	0	0	0	0	0	#N/A	#N/A	#N/A	#N/A
hsa-miR-3672	0	0	0	0	0	0	#N/A	#N/A	#N/A	#N/A
hsa-miR-5708	0	0	0	0	0	0	#N/A	#N/A	#N/A	#N/A
hsa-miR-640	0	0	0	0	0	0	#N/A	#N/A	#N/A	#N/A
hsa-miR-500a-3p	0	0	0	0	0	0	#N/A	#N/A	#N/A	#N/A
hsa-miR-6811-5p	0	0	0	0	0	0	#N/A	#N/A	#N/A	#N/A
hsa-miR-6836-3p	0	0	0	0	0	0	#N/A	#N/A	#N/A	#N/A
hsa-miR-4737	0	0	0	0	0	0	#N/A	#N/A	#N/A	#N/A
hsa-miR-4754	0	0	0	0	0	0	#N/A	#N/A	#N/A	#N/A
hsa-miR-5089-3p	0	0	0	0	0	0	#N/A	#N/A	#N/A	#N/A
hsa-miR-628-5p	0	0	0	0	0	0	#N/A	#N/A	#N/A	#N/A
hsa-miR-4531	0	0	0	0	0	0	#N/A	#N/A	#N/A	#N/A
hsa-miR-620	0	0	0	0	0	0	#N/A	#N/A	#N/A	#N/A
hsa-miR-6874-5p	0	0	0	0	0	0	#N/A	#N/A	#N/A	#N/A
hsa-miR-4642	0	0	0	0	0	0	#N/A	#N/A	#N/A	#N/A
hsa-miR-548s	0	0	0	0	0	0	#N/A	#N/A	#N/A	#N/A
hsa-miR-4435	0	0	0	0	0	0	#N/A	#N/A	#N/A	#N/A
hsa-miR-6810-5p	0	0	0	0	0	0	#N/A	#N/A	#N/A	#N/A
hsa-miR-6812-5p	0	0	0	0	0	0	#N/A	#N/A	#N/A	#N/A
hsa-miR-1262	0	0	0	0	0	0	#N/A	#N/A	#N/A	#N/A
hsa-miR-4701-3p	0	0	0	0	0	0	#N/A	#N/A	#N/A	#N/A
hsa-miR-1263	0	0	0	0	0	0	#N/A	#N/A	#N/A	#N/A
hsa-miR-5587-5p	0	0	0	0	0	0	#N/A	#N/A	#N/A	#N/A
hsa-miR-6843-3p	0	0	0	0	0	0	#N/A	#N/A	#N/A	#N/A
hsa-miR-218-1-3p	0	0	0	0	0	0	#N/A	#N/A	#N/A	#N/A
hsa-miR-135b-3p	0	0	0	0	0	0	#N/A	#N/A	#N/A	#N/A
hsa-miR-568	0	0	0	0	0	0	#N/A	#N/A	#N/A	#N/A
hsa-miR-3912-5p	0	0	0	0	0	0	#N/A	#N/A	#N/A	#N/A
hsa-miR-4433b-5p	0	0	0	0	0	0	#N/A	#N/A	#N/A	#N/A
hsa-miR-8070	0	0	0	0	0	0	#N/A	#N/A	#N/A	#N/A
hsa-miR-550b-2-5p	0	0	0	0	0	0	#N/A	#N/A	#N/A	#N/A
hsa-miR-4296	0	0	0	0	0	0	#N/A	#N/A	#N/A	#N/A
hsa-miR-4477b	0	0	0	0	0	0	#N/A	#N/A	#N/A	#N/A
hsa-miR-6509-5p	0	0	0	0	0	0	#N/A	#N/A	#N/A	#N/A
hsa-miR-384	0	0	0	0	0	0	#N/A	#N/A	#N/A	#N/A
hsa-miR-4263	0	0	0	0	0	0	#N/A	#N/A	#N/A	#N/A
hsa-miR-4768-5p	0	0	0	0	0	0	#N/A	#N/A	#N/A	#N/A
hsa-miR-544a	0	0	0	0	0	0	#N/A	#N/A	#N/A	#N/A
hsa-miR-6875-3p	0	0	0	0	0	0	#N/A	#N/A	#N/A	#N/A
hsa-miR-510-3p	0	0	0	0	0	0	#N/A	#N/A	#N/A	#N/A
hsa-miR-514b-3p	0	0	0	0	0	0	#N/A	#N/A	#N/A	#N/A
hsa-miR-514a-3p	0	0	0	0	0	0	#N/A	#N/A	#N/A	#N/A
hsa-miR-4774-3p	0	0	0	0	0	0	#N/A	#N/A	#N/A	#N/A
hsa-miR-3152-5p	0	0	0	0	0	0	#N/A	#N/A	#N/A	#N/A
hsa-miR-4529-3p	0	0	0	0	0	0	#N/A	#N/A	#N/A	#N/A
hsa-miR-450a-2-3p	0	0	0	0	0	0	#N/A	#N/A	#N/A	#N/A
hsa-miR-3674	0	0	0	0	0	0	#N/A	#N/A	#N/A	#N/A
hsa-miR-4646-3p	0	0	0	0	0	0	#N/A	#N/A	#N/A	#N/A
hsa-miR-2355-3p	0	0	0	0	0	0	#N/A	#N/A	#N/A	#N/A
hsa-miR-6739-3p	0	0	0	0	0	0	#N/A	#N/A	#N/A	#N/A
hsa-miR-4446-5p	0	0	0	0	0	0	#N/A	#N/A	#N/A	#N/A
hsa-miR-2113	0	0	0	0	0	0	#N/A	#N/A	#N/A	#N/A
hsa-miR-548d-3p	0	0	0	0	0	0	#N/A	#N/A	#N/A	#N/A
hsa-miR-548bb-3p	0	0	0	0	0	0	#N/A	#N/A	#N/A	#N/A
hsa-miR-548h-3p	0	0	0	0	0	0	#N/A	#N/A	#N/A	#N/A
hsa-miR-548ac	0	0	0	0	0	0	#N/A	#N/A	#N/A	#N/A
hsa-miR-548ae-3p	0	0	0	0	0	0	#N/A	#N/A	#N/A	#N/A
hsa-miR-548aq-3p	0	0	0	0	0	0	#N/A	#N/A	#N/A	#N/A
hsa-miR-548ah-3p	0	0	0	0	0	0	#N/A	#N/A	#N/A	#N/A
hsa-miR-548am-3p	0	0	0	0	0	0	#N/A	#N/A	#N/A	#N/A
hsa-miR-548j-3p	0	0	0	0	0	0	#N/A	#N/A	#N/A	#N/A
hsa-miR-548c-3p	0	0	0	0	0	0	#N/A	#N/A	#N/A	#N/A
hsa-miR-548at-3p	0	0	0	0	0	0	#N/A	#N/A	#N/A	#N/A
hsa-miR-548ay-3p	0	0	0	0	0	0	#N/A	#N/A	#N/A	#N/A
hsa-miR-548a-3p	0	0	0	0	0	0	#N/A	#N/A	#N/A	#N/A
hsa-miR-548e-5p	0	0	0	0	0	0	#N/A	#N/A	#N/A	#N/A
hsa-miR-548n	0	0	0	0	0	0	#N/A	#N/A	#N/A	#N/A
hsa-miR-548t-5p	0	0	0	0	0	0	#N/A	#N/A	#N/A	#N/A
hsa-miR-548az-5p	0	0	0	0	0	0	#N/A	#N/A	#N/A	#N/A
hsa-miR-497-3p	0	0	0	0	0	0	#N/A	#N/A	#N/A	#N/A
hsa-miR-6771-3p	0	0	0	0	0	0	#N/A	#N/A	#N/A	#N/A
hsa-miR-548u	0	0	0	0	0	0	#N/A	#N/A	#N/A	#N/A
hsa-miR-583	0	0	0	0	0	0	#N/A	#N/A	#N/A	#N/A
hsa-miR-518b	0	0	0	0	0	0	#N/A	#N/A	#N/A	#N/A
hsa-miR-518d-3p	0	0	0	0	0	0	#N/A	#N/A	#N/A	#N/A
hsa-miR-518c-3p	0	0	0	0	0	0	#N/A	#N/A	#N/A	#N/A
hsa-miR-6768-3p	0	0	0	0	0	0	#N/A	#N/A	#N/A	#N/A
hsa-miR-548m	0	0	0	0	0	0	#N/A	#N/A	#N/A	#N/A
hsa-miR-6507-3p	0	0	0	0	0	0	#N/A	#N/A	#N/A	#N/A
hsa-miR-3609	0	0	0	0	0	0	#N/A	#N/A	#N/A	#N/A
hsa-miR-519d-3p	0	0	0	0	0	0	#N/A	#N/A	#N/A	#N/A
hsa-miR-561-3p	0	0	0	0	0	0	#N/A	#N/A	#N/A	#N/A
hsa-miR-5692a	0	0	0	0	0	0	#N/A	#N/A	#N/A	#N/A
hsa-miR-1252-3p	0	0	0	0	0	0	#N/A	#N/A	#N/A	#N/A
hsa-miR-4694-3p	0	0	0	0	0	0	#N/A	#N/A	#N/A	#N/A
hsa-miR-10a-3p	0	0	0	0	0	0	#N/A	#N/A	#N/A	#N/A
hsa-miR-7-2-3p	0	0	0	0	0	0	#N/A	#N/A	#N/A	#N/A
hsa-miR-196a-1-3p	0	0	0	0	0	0	#N/A	#N/A	#N/A	#N/A
hsa-miR-6776-3p	0	0	0	0	0	0	#N/A	#N/A	#N/A	#N/A
hsa-miR-3150a-5p	0	0	0	0	0	0	#N/A	#N/A	#N/A	#N/A
hsa-miR-3150b-5p	0	0	0	0	0	0	#N/A	#N/A	#N/A	#N/A
hsa-miR-490-3p	0	0	0	0	0	0	#N/A	#N/A	#N/A	#N/A
hsa-miR-708-3p	0	0	0	0	0	0	#N/A	#N/A	#N/A	#N/A
hsa-miR-548b-3p	0	0	0	0	0	0	#N/A	#N/A	#N/A	#N/A
hsa-miR-7109-3p	0	0	0	0	0	0	#N/A	#N/A	#N/A	#N/A
hsa-miR-99a-3p	0	0	0	0	0	0	#N/A	#N/A	#N/A	#N/A
hsa-miR-4428	0	0	0	0	0	0	#N/A	#N/A	#N/A	#N/A
hsa-miR-12118	0	0	0	0	0	0	#N/A	#N/A	#N/A	#N/A
hsa-miR-4753-5p	0	0	0	0	0	0	#N/A	#N/A	#N/A	#N/A
hsa-miR-4475	0	0	0	0	0	0	#N/A	#N/A	#N/A	#N/A
hsa-miR-1264	0	0	0	0	0	0	#N/A	#N/A	#N/A	#N/A
hsa-miR-5197-5p	0	0	0	0	0	0	#N/A	#N/A	#N/A	#N/A
hsa-miR-8066	0	0	0	0	0	0	#N/A	#N/A	#N/A	#N/A
hsa-miR-5571-5p	0	0	0	0	0	0	#N/A	#N/A	#N/A	#N/A
hsa-miR-32-3p	0	0	0	0	0	0	#N/A	#N/A	#N/A	#N/A
hsa-miR-624-3p	0	0	0	0	0	0	#N/A	#N/A	#N/A	#N/A
hsa-miR-4731-3p	0	0	0	0	0	0	#N/A	#N/A	#N/A	#N/A
hsa-miR-8485	0	0	0	0	0	0	#N/A	#N/A	#N/A	#N/A
hsa-miR-603	0	0	0	0	0	0	#N/A	#N/A	#N/A	#N/A
hsa-miR-6768-5p	0	0	0	0	0	0	#N/A	#N/A	#N/A	#N/A
hsa-miR-4789-3p	0	0	0	0	0	0	#N/A	#N/A	#N/A	#N/A
hsa-miR-3120-3p	0	0	0	0	0	0	#N/A	#N/A	#N/A	#N/A
hsa-miR-4700-3p	0	0	0	0	0	0	#N/A	#N/A	#N/A	#N/A
hsa-miR-4438	0	0	0	0	0	0	#N/A	#N/A	#N/A	#N/A
hsa-miR-5580-3p	0	0	0	0	0	0	#N/A	#N/A	#N/A	#N/A
hsa-miR-942-3p	0	0	0	0	0	0	#N/A	#N/A	#N/A	#N/A
hsa-miR-1911-3p	0	0	0	0	0	0	#N/A	#N/A	#N/A	#N/A
hsa-miR-6753-5p	0	0	0	0	0	0	#N/A	#N/A	#N/A	#N/A
hsa-miR-7153-3p	0	0	0	0	0	0	#N/A	#N/A	#N/A	#N/A
hsa-miR-1295b-5p	0	0	0	0	0	0	#N/A	#N/A	#N/A	#N/A
hsa-miR-4640-3p	0	0	0	0	0	0	#N/A	#N/A	#N/A	#N/A
hsa-miR-6510-3p	0	0	0	0	0	0	#N/A	#N/A	#N/A	#N/A
hsa-miR-4655-5p	0	0	0	0	0	0	#N/A	#N/A	#N/A	#N/A
hsa-miR-6800-3p	0	0	0	0	0	0	#N/A	#N/A	#N/A	#N/A
hsa-miR-3200-3p	0	0	0	0	0	0	#N/A	#N/A	#N/A	#N/A
hsa-miR-6782-3p	0	0	0	0	0	0	#N/A	#N/A	#N/A	#N/A
hsa-miR-4445-3p	0	0	0	0	0	0	#N/A	#N/A	#N/A	#N/A
hsa-miR-512-5p	0	0	0	0	0	0	#N/A	#N/A	#N/A	#N/A
hsa-miR-4418	0	0	0	0	0	0	#N/A	#N/A	#N/A	#N/A
hsa-miR-6807-3p	0	0	0	0	0	0	#N/A	#N/A	#N/A	#N/A
hsa-miR-892b	0	0	0	0	0	0	#N/A	#N/A	#N/A	#N/A
hsa-miR-1183	0	0	0	0	0	0	#N/A	#N/A	#N/A	#N/A
hsa-miR-4318	0	0	0	0	0	0	#N/A	#N/A	#N/A	#N/A
hsa-miR-892a	0	0	0	0	0	0	#N/A	#N/A	#N/A	#N/A
hsa-miR-4676-3p	0	0	0	0	0	0	#N/A	#N/A	#N/A	#N/A
hsa-miR-892c-3p	0	0	0	0	0	0	#N/A	#N/A	#N/A	#N/A
hsa-miR-374c-3p	0	0	0	0	0	0	#N/A	#N/A	#N/A	#N/A
hsa-miR-4773	0	0	0	0	0	0	#N/A	#N/A	#N/A	#N/A
hsa-miR-3154	0	0	0	0	0	0	#N/A	#N/A	#N/A	#N/A
hsa-miR-3123	0	0	0	0	0	0	#N/A	#N/A	#N/A	#N/A
hsa-miR-6873-5p	0	0	0	0	0	0	#N/A	#N/A	#N/A	#N/A
hsa-miR-5586-3p	0	0	0	0	0	0	#N/A	#N/A	#N/A	#N/A
hsa-miR-5694	0	0	0	0	0	0	#N/A	#N/A	#N/A	#N/A
hsa-miR-6871-3p	0	0	0	0	0	0	#N/A	#N/A	#N/A	#N/A
hsa-miR-6165	0	0	0	0	0	0	#N/A	#N/A	#N/A	#N/A
hsa-miR-6510-5p	0	0	0	0	0	0	#N/A	#N/A	#N/A	#N/A
hsa-miR-4274	0	0	0	0	0	0	#N/A	#N/A	#N/A	#N/A
hsa-miR-4519	0	0	0	0	0	0	#N/A	#N/A	#N/A	#N/A
hsa-miR-449b-3p	0	0	0	0	0	0	#N/A	#N/A	#N/A	#N/A
hsa-miR-6858-3p	0	0	0	0	0	0	#N/A	#N/A	#N/A	#N/A
hsa-miR-4323	0	0	0	0	0	0	#N/A	#N/A	#N/A	#N/A
hsa-miR-3940-3p	0	0	0	0	0	0	#N/A	#N/A	#N/A	#N/A
hsa-miR-4687-5p	0	0	0	0	0	0	#N/A	#N/A	#N/A	#N/A
hsa-miR-6746-3p	0	0	0	0	0	0	#N/A	#N/A	#N/A	#N/A
hsa-miR-6877-3p	0	0	0	0	0	0	#N/A	#N/A	#N/A	#N/A
hsa-miR-4293	0	0	0	0	0	0	#N/A	#N/A	#N/A	#N/A
hsa-miR-7846-3p	0	0	0	0	0	0	#N/A	#N/A	#N/A	#N/A
hsa-miR-6876-5p	0	0	0	0	0	0	#N/A	#N/A	#N/A	#N/A
hsa-miR-4476	0	0	0	0	0	0	#N/A	#N/A	#N/A	#N/A
hsa-miR-8083	0	0	0	0	0	0	#N/A	#N/A	#N/A	#N/A
hsa-miR-4695-5p	0	0	0	0	0	0	#N/A	#N/A	#N/A	#N/A
hsa-miR-4433b-3p	0	0	0	0	0	0	#N/A	#N/A	#N/A	#N/A
hsa-miR-4661-3p	0	0	0	0	0	0	#N/A	#N/A	#N/A	#N/A
hsa-miR-10524-5p	0	0	0	0	0	0	#N/A	#N/A	#N/A	#N/A
hsa-miR-1265	0	0	0	0	0	0	#N/A	#N/A	#N/A	#N/A
hsa-miR-3622a-5p	0	0	0	0	0	0	#N/A	#N/A	#N/A	#N/A
hsa-miR-6511a-5p	0	0	0	0	0	0	#N/A	#N/A	#N/A	#N/A
hsa-miR-6808-5p	0	0	0	0	0	0	#N/A	#N/A	#N/A	#N/A
hsa-miR-6893-5p	0	0	0	0	0	0	#N/A	#N/A	#N/A	#N/A
hsa-miR-2682-5p	0	0	0	0	0	0	#N/A	#N/A	#N/A	#N/A
hsa-miR-15a-3p	0	0	0	0	0	0	#N/A	#N/A	#N/A	#N/A
hsa-miR-3186-5p	0	0	0	0	0	0	#N/A	#N/A	#N/A	#N/A
hsa-miR-5584-5p	0	0	0	0	0	0	#N/A	#N/A	#N/A	#N/A
hsa-miR-6750-5p	0	0	0	0	0	0	#N/A	#N/A	#N/A	#N/A
hsa-miR-6822-5p	0	0	0	0	0	0	#N/A	#N/A	#N/A	#N/A
hsa-miR-6760-5p	0	0	0	0	0	0	#N/A	#N/A	#N/A	#N/A
hsa-miR-4756-5p	0	0	0	0	0	0	#N/A	#N/A	#N/A	#N/A
hsa-miR-1321	0	0	0	0	0	0	#N/A	#N/A	#N/A	#N/A
hsa-miR-6735-5p	0	0	0	0	0	0	#N/A	#N/A	#N/A	#N/A
hsa-miR-4436b-3p	0	0	0	0	0	0	#N/A	#N/A	#N/A	#N/A
hsa-miR-6879-5p	0	0	0	0	0	0	#N/A	#N/A	#N/A	#N/A
hsa-miR-6895-5p	0	0	0	0	0	0	#N/A	#N/A	#N/A	#N/A
hsa-miR-7160-3p	0	0	0	0	0	0	#N/A	#N/A	#N/A	#N/A
hsa-miR-4512	0	0	0	0	0	0	#N/A	#N/A	#N/A	#N/A
hsa-miR-5088-5p	0	0	0	0	0	0	#N/A	#N/A	#N/A	#N/A
hsa-miR-4446-3p	0	9.3875	0	0	0	0	#N/A	#N/A	#N/A	#N/A
hsa-miR-6813-5p	0	0	0	0	0	0	#N/A	#N/A	#N/A	#N/A
hsa-miR-6794-5p	0	0	0	0	0	0	#N/A	#N/A	#N/A	#N/A
hsa-miR-1178-5p	0	0	0	0	0	0	#N/A	#N/A	#N/A	#N/A
hsa-miR-3927-3p	0	0	0	0	0	0	#N/A	#N/A	#N/A	#N/A
hsa-miR-370-5p	0	0	0	0	0	0	#N/A	#N/A	#N/A	#N/A
hsa-miR-431-3p	0	0	0	0	0	0	#N/A	#N/A	#N/A	#N/A
hsa-miR-12114	0	0	0	0	0	0	#N/A	#N/A	#N/A	#N/A
hsa-miR-802	0	0	0	0	0	0	#N/A	#N/A	#N/A	#N/A
hsa-miR-8079	0	0	0	0	0	0	#N/A	#N/A	#N/A	#N/A
hsa-miR-8062	0	0	0	0	0	0	#N/A	#N/A	#N/A	#N/A
hsa-miR-3666	0	0	0	0	0	0	#N/A	#N/A	#N/A	#N/A
hsa-miR-301b-3p	0	0	0	0	0	0	#N/A	#N/A	#N/A	#N/A
hsa-miR-4295	0	0	0	0	0	0	#N/A	#N/A	#N/A	#N/A
hsa-miR-3677-5p	0	0	0	0	0	0	#N/A	#N/A	#N/A	#N/A
hsa-miR-4255	0	0	0	0	0	0	#N/A	#N/A	#N/A	#N/A
hsa-miR-101-5p	0	0	0	0	0	0	#N/A	#N/A	#N/A	#N/A
hsa-miR-5000-5p	0	0	0	0	0	0	#N/A	#N/A	#N/A	#N/A
hsa-miR-6874-3p	0	0	0	0	0	0	#N/A	#N/A	#N/A	#N/A
hsa-miR-4259	0	0	0	0	0	0	#N/A	#N/A	#N/A	#N/A
hsa-miR-4666a-3p	0	0	0	0	0	0	#N/A	#N/A	#N/A	#N/A
hsa-miR-10397-3p	0	0	0	0	0	0	#N/A	#N/A	#N/A	#N/A
hsa-miR-3651	0	0	0	0	0	0	#N/A	#N/A	#N/A	#N/A
hsa-miR-2115-3p	0	0	0	0	0	0	#N/A	#N/A	#N/A	#N/A
hsa-miR-3617-3p	0	0	0	0	0	0	#N/A	#N/A	#N/A	#N/A
hsa-miR-217-3p	0	0	0	0	0	0	#N/A	#N/A	#N/A	#N/A
hsa-miR-4800-3p	0	0	0	0	0	0	#N/A	#N/A	#N/A	#N/A
hsa-miR-3675-3p	0	0	0	0	0	0	#N/A	#N/A	#N/A	#N/A
hsa-miR-3126-3p	0	0	0	0	0	0	#N/A	#N/A	#N/A	#N/A
hsa-miR-1298-3p	0	0	0	0	0	0	#N/A	#N/A	#N/A	#N/A
hsa-miR-141-5p	0	0	0	0	0	0	#N/A	#N/A	#N/A	#N/A
hsa-miR-4757-3p	0	0	0	0	0	0	#N/A	#N/A	#N/A	#N/A
hsa-miR-3146	0	0	0	0	0	0	#N/A	#N/A	#N/A	#N/A
hsa-miR-4728-3p	0	0	0	0	0	0	#N/A	#N/A	#N/A	#N/A
hsa-miR-6871-5p	0	0	0	0	0	0	#N/A	#N/A	#N/A	#N/A
hsa-miR-6890-5p	0	0	0	0	0	0	#N/A	#N/A	#N/A	#N/A
hsa-miR-218-2-3p	0	0	0	0	0	0	#N/A	#N/A	#N/A	#N/A
hsa-miR-6504-3p	0	0	0	0	0	0	#N/A	#N/A	#N/A	#N/A
hsa-miR-4272	0	0	0	0	0	0	#N/A	#N/A	#N/A	#N/A
hsa-miR-548o-3p	0	0	0	0	0	0	#N/A	#N/A	#N/A	#N/A
hsa-miR-6715a-3p	0	0	0	0	0	0	#N/A	#N/A	#N/A	#N/A
hsa-miR-4762-5p	0	0	0	0	0	0	#N/A	#N/A	#N/A	#N/A
hsa-miR-4714-3p	0	0	0	0	0	0	#N/A	#N/A	#N/A	#N/A
hsa-miR-6830-5p	0	0	0	0	0	0	#N/A	#N/A	#N/A	#N/A
hsa-miR-16-2-3p	0	0	0	0	0	0	#N/A	#N/A	#N/A	#N/A
hsa-miR-4275	0	0	0	0	0	0	#N/A	#N/A	#N/A	#N/A
hsa-miR-4733-3p	0	0	0	0	0	0	#N/A	#N/A	#N/A	#N/A
hsa-miR-181d-3p	0	0	0	0	0	0	#N/A	#N/A	#N/A	#N/A
hsa-miR-1306-5p	0	0	0	0	0	0	#N/A	#N/A	#N/A	#N/A
hsa-miR-6767-3p	0	0	0	0	0	0	#N/A	#N/A	#N/A	#N/A
hsa-miR-6890-3p	0	0	0	0	0	0	#N/A	#N/A	#N/A	#N/A
hsa-miR-3614-5p	0	0	0	0	0	0	#N/A	#N/A	#N/A	#N/A
hsa-miR-1324	0	0	0	0	0	0	#N/A	#N/A	#N/A	#N/A
hsa-miR-4494	0	0	0	0	0	0	#N/A	#N/A	#N/A	#N/A
hsa-miR-4756-3p	0	0	0	0	0	0	#N/A	#N/A	#N/A	#N/A
hsa-miR-6501-3p	0	0	0	0	0	0	#N/A	#N/A	#N/A	#N/A
hsa-miR-4257	0	0	0	0	0	0	#N/A	#N/A	#N/A	#N/A
hsa-miR-4691-3p	0	0	0	0	0	0	#N/A	#N/A	#N/A	#N/A
hsa-miR-4768-3p	0	0	0	0	0	0	#N/A	#N/A	#N/A	#N/A
hsa-miR-3155b	0	0	0	0	0	0	#N/A	#N/A	#N/A	#N/A
hsa-miR-3155a	0	0	0	0	0	0	#N/A	#N/A	#N/A	#N/A
hsa-miR-6754-5p	0	0	0	0	0	0	#N/A	#N/A	#N/A	#N/A
hsa-miR-6798-5p	0	0	0	0	0	0	#N/A	#N/A	#N/A	#N/A
hsa-miR-16-1-3p	0	0	0	0	0	0	#N/A	#N/A	#N/A	#N/A
hsa-miR-1910-5p	0	0	0	0	0	0	#N/A	#N/A	#N/A	#N/A
hsa-miR-5190	0	0	0	0	0	0	#N/A	#N/A	#N/A	#N/A
hsa-miR-194-3p	0	0	0	0	0	0	#N/A	#N/A	#N/A	#N/A
hsa-miR-4302	0	0	0	0	0	0	#N/A	#N/A	#N/A	#N/A
hsa-miR-935	0	0	0	0	0	0	#N/A	#N/A	#N/A	#N/A
hsa-miR-4328	0	0	0	0	0	0	#N/A	#N/A	#N/A	#N/A
hsa-miR-8060	0	0	0	0	0	0	#N/A	#N/A	#N/A	#N/A
hsa-miR-10226	0	0	0	0	0	0	#N/A	#N/A	#N/A	#N/A
hsa-miR-323b-3p	0	0	0	0	0	0	#N/A	#N/A	#N/A	#N/A
hsa-miR-324-3p	0	0	0	0	0	0	#N/A	#N/A	#N/A	#N/A
hsa-miR-9902	0	0	0	0	0	0	#N/A	#N/A	#N/A	#N/A
hsa-miR-488-5p	0	0	0	0	0	0	#N/A	#N/A	#N/A	#N/A
hsa-miR-4530	0	0	0	0	0	0	#N/A	#N/A	#N/A	#N/A
hsa-miR-4685-5p	0	0	0	0	0	0	#N/A	#N/A	#N/A	#N/A
hsa-miR-6884-3p	0	0	0	0	0	0	#N/A	#N/A	#N/A	#N/A
hsa-miR-6872-3p	0	0	0	0	0	0	#N/A	#N/A	#N/A	#N/A
hsa-miR-1224-3p	0	0	0	0	0	0	#N/A	#N/A	#N/A	#N/A
hsa-miR-1915-3p	0	0	0	0	0	0	#N/A	#N/A	#N/A	#N/A
hsa-miR-4258	0	0	0	0	0	0	#N/A	#N/A	#N/A	#N/A
hsa-miR-1247-3p	0	0	0	0	0	0	#N/A	#N/A	#N/A	#N/A
hsa-miR-4783-3p	0	0	0	0	0	0	#N/A	#N/A	#N/A	#N/A
hsa-miR-4292	0	0	0	0	0	0	#N/A	#N/A	#N/A	#N/A
hsa-miR-6791-5p	0	0	0	0	0	0	#N/A	#N/A	#N/A	#N/A
hsa-miR-6886-5p	0	0	0	0	0	0	#N/A	#N/A	#N/A	#N/A
hsa-miR-1203	0	0	0	0	0	0	#N/A	#N/A	#N/A	#N/A
hsa-miR-6850-3p	0	0	0	0	0	0	#N/A	#N/A	#N/A	#N/A
hsa-miR-6891-3p	0	0	0	0	0	0	#N/A	#N/A	#N/A	#N/A
hsa-miR-4723-3p	0	0	0	0	0	0	#N/A	#N/A	#N/A	#N/A
hsa-miR-6769b-3p	0	0	0	0	0	0	#N/A	#N/A	#N/A	#N/A
hsa-miR-4324	0	0	0	0	0	0	#N/A	#N/A	#N/A	#N/A
hsa-miR-6893-3p	0	0	0	0	0	0	#N/A	#N/A	#N/A	#N/A
hsa-miR-939-3p	0	0	0	0	0	0	#N/A	#N/A	#N/A	#N/A
hsa-miR-6852-5p	0	0	0	0	0	0	#N/A	#N/A	#N/A	#N/A
hsa-miR-1914-5p	0	0	0	0	0	0	#N/A	#N/A	#N/A	#N/A
hsa-miR-1266-3p	0	0	0	0	0	0	#N/A	#N/A	#N/A	#N/A
hsa-miR-6734-3p	0	0	0	0	0	0	#N/A	#N/A	#N/A	#N/A
hsa-miR-3189-3p	0	0	0	0	0	0	#N/A	#N/A	#N/A	#N/A
hsa-miR-6078	0	0	0	0	0	0	#N/A	#N/A	#N/A	#N/A
hsa-miR-6880-3p	0	0	0	0	0	0	#N/A	#N/A	#N/A	#N/A
hsa-miR-6812-3p	0	0	0	0	0	0	#N/A	#N/A	#N/A	#N/A
hsa-miR-4315	0	0	0	0	0	0	#N/A	#N/A	#N/A	#N/A
hsa-miR-4304	0	0	0	0	0	0	#N/A	#N/A	#N/A	#N/A
hsa-miR-10392-3p	0	0	0	0	0	0	#N/A	#N/A	#N/A	#N/A
hsa-miR-1908-3p	648.834	0	0	0	0	0	#N/A	#N/A	#N/A	#N/A
hsa-miR-6746-5p	0	0	0	0	0	0	#N/A	#N/A	#N/A	#N/A
hsa-miR-5090	0	0	0	0	0	0	#N/A	#N/A	#N/A	#N/A
hsa-miR-4746-5p	0	0	0	0	0	0	#N/A	#N/A	#N/A	#N/A
hsa-miR-6070	0	0	0	0	0	0	#N/A	#N/A	#N/A	#N/A
hsa-miR-1181	0	0	0	0	0	0	#N/A	#N/A	#N/A	#N/A
hsa-miR-4735-5p	0	0	0	0	0	0	#N/A	#N/A	#N/A	#N/A
hsa-miR-8067	0	0	0	0	0	0	#N/A	#N/A	#N/A	#N/A
hsa-miR-4305	0	0	0	0	0	0	#N/A	#N/A	#N/A	#N/A
hsa-miR-325	0	0	0	0	0	0	#N/A	#N/A	#N/A	#N/A
hsa-miR-372-5p	0	0	0	0	0	0	#N/A	#N/A	#N/A	#N/A
hsa-miR-6511a-3p	0	0	0	0	0	0	#N/A	#N/A	#N/A	#N/A
hsa-miR-6862-3p	0	0	0	0	0	0	#N/A	#N/A	#N/A	#N/A
hsa-miR-4330	0	0	0	0	0	0	#N/A	#N/A	#N/A	#N/A
hsa-miR-1266-5p	0	0	0	0	0	0	#N/A	#N/A	#N/A	#N/A
hsa-miR-519d-5p	0	0	0	0	0	0	#N/A	#N/A	#N/A	#N/A
hsa-miR-2116-3p	0	0	0	0	0	0	#N/A	#N/A	#N/A	#N/A
hsa-miR-7113-3p	0	0	0	0	0	0	#N/A	#N/A	#N/A	#N/A
hsa-miR-1976	0	0	0	0	0	0	#N/A	#N/A	#N/A	#N/A
hsa-miR-8088	0	0	0	0	0	0	#N/A	#N/A	#N/A	#N/A
hsa-miR-520f-5p	0	0	0	0	0	0	#N/A	#N/A	#N/A	#N/A
hsa-miR-520b-5p	0	0	0	0	0	0	#N/A	#N/A	#N/A	#N/A
hsa-miR-517-5p	0	0	0	0	0	0	#N/A	#N/A	#N/A	#N/A
hsa-miR-3059-3p	0	0	0	0	0	0	#N/A	#N/A	#N/A	#N/A
hsa-miR-6845-3p	0	0	0	0	0	0	#N/A	#N/A	#N/A	#N/A
hsa-miR-146a-3p	0	0	0	0	0	0	#N/A	#N/A	#N/A	#N/A
hsa-miR-1236-3p	0	0	0	0	0	0	#N/A	#N/A	#N/A	#N/A
hsa-miR-6730-3p	0	0	0	0	0	0	#N/A	#N/A	#N/A	#N/A
hsa-miR-4750-3p	0	0	0	0	0	0	#N/A	#N/A	#N/A	#N/A
hsa-miR-4251	0	0	0	0	0	0	#N/A	#N/A	#N/A	#N/A
hsa-miR-4329	0	0	0	0	0	0	#N/A	#N/A	#N/A	#N/A
hsa-miR-1199-5p	0	0	0	0	0	0	#N/A	#N/A	#N/A	#N/A
hsa-miR-3151-3p	0	0	0	0	0	0	#N/A	#N/A	#N/A	#N/A
hsa-miR-4772-3p	0	0	0	0	0	0	#N/A	#N/A	#N/A	#N/A
hsa-miR-3158-5p	0	0	0	0	0	0	#N/A	#N/A	#N/A	#N/A
hsa-miR-1184	0	0	0	0	0	0	#N/A	#N/A	#N/A	#N/A
hsa-miR-6068	0	0	0	0	0	0	#N/A	#N/A	#N/A	#N/A
hsa-miR-4520-5p	0	0	0	0	0	0	#N/A	#N/A	#N/A	#N/A
hsa-miR-3692-5p	0	0	0	0	0	0	#N/A	#N/A	#N/A	#N/A
hsa-miR-875-3p	0	0	0	0	0	0	#N/A	#N/A	#N/A	#N/A
hsa-miR-4638-3p	0	0	0	0	0	0	#N/A	#N/A	#N/A	#N/A
hsa-miR-4720-5p	0	0	0	0	0	0	#N/A	#N/A	#N/A	#N/A
hsa-miR-3187-5p	0	0	0	0	0	0	#N/A	#N/A	#N/A	#N/A
hsa-miR-8089	0	0	0	0	0	0	#N/A	#N/A	#N/A	#N/A
hsa-miR-4456	0	0	0	0	0	0	#N/A	#N/A	#N/A	#N/A
hsa-miR-3120-5p	0	0	0	0	0	0	#N/A	#N/A	#N/A	#N/A
hsa-miR-6529-3p	0	0	0	0	0	0	#N/A	#N/A	#N/A	#N/A
hsa-miR-5008-3p	0	0	0	0	0	0	#N/A	#N/A	#N/A	#N/A
hsa-miR-134-3p	0	0	0	0	0	0	#N/A	#N/A	#N/A	#N/A
hsa-miR-1267	0	0	0	0	0	0	#N/A	#N/A	#N/A	#N/A
hsa-miR-6837-3p	0	0	0	0	0	0	#N/A	#N/A	#N/A	#N/A
hsa-miR-570-3p	0	0	0	0	0	0	#N/A	#N/A	#N/A	#N/A
hsa-miR-6790-3p	0	0	0	0	0	0	#N/A	#N/A	#N/A	#N/A
hsa-miR-2114-3p	0	0	0	0	0	0	#N/A	#N/A	#N/A	#N/A
hsa-miR-3616-3p	0	0	0	0	0	0	#N/A	#N/A	#N/A	#N/A
hsa-miR-6738-5p	0	0	0	0	0	0	#N/A	#N/A	#N/A	#N/A
hsa-miR-6804-3p	0	0	0	0	0	0	#N/A	#N/A	#N/A	#N/A
hsa-miR-3166	0	0	0	0	0	0	#N/A	#N/A	#N/A	#N/A
hsa-miR-6836-5p	0	0	0	0	0	0	#N/A	#N/A	#N/A	#N/A
hsa-miR-1909-3p	0	0	0	0	0	0	#N/A	#N/A	#N/A	#N/A
hsa-miR-4749-3p	0	0	0	0	0	0	#N/A	#N/A	#N/A	#N/A
hsa-miR-6869-3p	0	0	0	0	0	0	#N/A	#N/A	#N/A	#N/A
hsa-miR-2682-3p	0	0	0	0	0	0	#N/A	#N/A	#N/A	#N/A
hsa-miR-4763-5p	0	0	0	0	0	0	#N/A	#N/A	#N/A	#N/A
hsa-miR-3195	0	0	0	0	0	0	#N/A	#N/A	#N/A	#N/A
hsa-miR-6720-3p	0	0	0	0	0	0	#N/A	#N/A	#N/A	#N/A
hsa-miR-4479	0	0	0	0	0	0	#N/A	#N/A	#N/A	#N/A
hsa-miR-4767	0	0	0	0	0	0	#N/A	#N/A	#N/A	#N/A
hsa-miR-3621	0	0	0	0	0	0	#N/A	#N/A	#N/A	#N/A
hsa-miR-1301-5p	0	0	0	0	0	0	#N/A	#N/A	#N/A	#N/A
hsa-miR-9851-5p	0	0	0	0	0	0	#N/A	#N/A	#N/A	#N/A
hsa-miR-1251-3p	0	0	0	0	0	0	#N/A	#N/A	#N/A	#N/A
hsa-miR-1255b-5p	0	0	0	0	0	0	#N/A	#N/A	#N/A	#N/A
hsa-miR-196a-3p	0	0	0	0	0	0	#N/A	#N/A	#N/A	#N/A
hsa-miR-1538	0	0	0	0	0	0	#N/A	#N/A	#N/A	#N/A
hsa-miR-4634	0	0	0	0	0	0	#N/A	#N/A	#N/A	#N/A
hsa-miR-10400-5p	0	0	0	0	0	0	#N/A	#N/A	#N/A	#N/A
hsa-miR-10396b-5p	0	0	0	0	0	0	#N/A	#N/A	#N/A	#N/A
hsa-miR-3652	0	0	0	0	0	0	#N/A	#N/A	#N/A	#N/A
hsa-miR-8052	0	0	0	0	0	0	#N/A	#N/A	#N/A	#N/A
hsa-miR-6726-5p	0	0	0	0	0	0	#N/A	#N/A	#N/A	#N/A
hsa-miR-6862-5p	0	0	0	0	0	0	#N/A	#N/A	#N/A	#N/A
hsa-miR-6781-5p	0	0	0	0	0	0	#N/A	#N/A	#N/A	#N/A
hsa-miR-9899	0	0	0	0	0	0	#N/A	#N/A	#N/A	#N/A
hsa-miR-1268b	0	0	0	0	0	0	#N/A	#N/A	#N/A	#N/A
hsa-miR-4741	0	0	0	0	0	0	#N/A	#N/A	#N/A	#N/A
hsa-miR-3175	0	0	0	0	0	0	#N/A	#N/A	#N/A	#N/A
hsa-miR-6845-5p	0	0	0	0	0	0	#N/A	#N/A	#N/A	#N/A
hsa-miR-6762-5p	0	0	0	0	0	0	#N/A	#N/A	#N/A	#N/A
hsa-miR-3196	0	0	0	0	0	0	#N/A	#N/A	#N/A	#N/A
hsa-miR-1237-5p	0	0	0	0	0	0	#N/A	#N/A	#N/A	#N/A
hsa-miR-4651	0	0	0	0	0	0	#N/A	#N/A	#N/A	#N/A
hsa-miR-197-5p	0	0	0	0	0	0	#N/A	#N/A	#N/A	#N/A
hsa-miR-363-5p	0	0	0	0	0	0	#N/A	#N/A	#N/A	#N/A
hsa-miR-6766-5p	0	0	0	0	0	0	#N/A	#N/A	#N/A	#N/A
hsa-miR-12130	0	0	0	0	0	0	#N/A	#N/A	#N/A	#N/A
hsa-miR-9901	0	0	0	0	0	0	#N/A	#N/A	#N/A	#N/A
hsa-miR-8071	0	0	0	0	0	0	#N/A	#N/A	#N/A	#N/A
hsa-miR-505-3p	0	0	0	0	0	0	#N/A	#N/A	#N/A	#N/A
hsa-miR-4433a-5p	0	0	0	0	0	0	#N/A	#N/A	#N/A	#N/A
hsa-miR-4449	0	0	0	0	0	0	#N/A	#N/A	#N/A	#N/A
hsa-miR-200c-5p	0	0	0	0	0	0	#N/A	#N/A	#N/A	#N/A
hsa-miR-7847-3p	0	0	0	0	0	0	#N/A	#N/A	#N/A	#N/A
hsa-miR-376b-5p	0	0	0	0	0	0	#N/A	#N/A	#N/A	#N/A
hsa-miR-8056	0	0	0	0	0	0	#N/A	#N/A	#N/A	#N/A
hsa-miR-4711-3p	0	0	0	0	0	0	#N/A	#N/A	#N/A	#N/A
hsa-miR-10401-5p	0	0	0	0	0	0	#N/A	#N/A	#N/A	#N/A
hsa-miR-124-5p	0	0	0	0	0	0	#N/A	#N/A	#N/A	#N/A
hsa-miR-633	0	0	0	0	0	0	#N/A	#N/A	#N/A	#N/A
hsa-miR-524-5p	0	0	0	0	0	0	#N/A	#N/A	#N/A	#N/A
hsa-miR-520d-5p	0	0	0	0	0	0	#N/A	#N/A	#N/A	#N/A
hsa-miR-7151-3p	0	0	0	0	0	0	#N/A	#N/A	#N/A	#N/A
hsa-miR-6798-3p	0	0	0	0	0	0	#N/A	#N/A	#N/A	#N/A
hsa-miR-7848-3p	0	0	0	0	0	0	#N/A	#N/A	#N/A	#N/A
hsa-miR-3682-5p	0	0	0	0	0	0	#N/A	#N/A	#N/A	#N/A
hsa-miR-585-5p	0	0	0	0	0	0	#N/A	#N/A	#N/A	#N/A
hsa-miR-4266	0	0	0	0	0	0	#N/A	#N/A	#N/A	#N/A
hsa-miR-4278	0	0	0	0	0	0	#N/A	#N/A	#N/A	#N/A
hsa-miR-6802-5p	0	0	0	0	0	0	#N/A	#N/A	#N/A	#N/A
hsa-miR-921	0	0	0	0	0	0	#N/A	#N/A	#N/A	#N/A
hsa-miR-4473	0	0	0	0	0	0	#N/A	#N/A	#N/A	#N/A
hsa-miR-190a-3p	0	0	0	0	0	0	#N/A	#N/A	#N/A	#N/A
hsa-miR-8074	0	0	0	0	0	0	#N/A	#N/A	#N/A	#N/A
hsa-miR-4477a	0	0	0	0	0	0	#N/A	#N/A	#N/A	#N/A
hsa-miR-6715b-3p	0	0	0	0	0	0	#N/A	#N/A	#N/A	#N/A
hsa-miR-520e-5p	0	0	0	0	0	0	#N/A	#N/A	#N/A	#N/A
hsa-miR-4465	0	0	0	0	0	0	#N/A	#N/A	#N/A	#N/A
hsa-miR-6794-3p	0	0	0	0	0	0	#N/A	#N/A	#N/A	#N/A
hsa-miR-181b-3p	0	0	0	0	0	0	#N/A	#N/A	#N/A	#N/A
hsa-miR-181b-2-3p	0	0	0	0	0	0	#N/A	#N/A	#N/A	#N/A
hsa-miR-4276	0	0	0	0	0	0	#N/A	#N/A	#N/A	#N/A
hsa-miR-452-3p	0	0	0	0	0	0	#N/A	#N/A	#N/A	#N/A
hsa-miR-1912-5p	0	0	0	0	0	0	#N/A	#N/A	#N/A	#N/A
hsa-miR-5696	0	0	0	0	0	0	#N/A	#N/A	#N/A	#N/A
hsa-miR-520a-5p	0	0	0	0	0	0	#N/A	#N/A	#N/A	#N/A
hsa-miR-525-5p	0	0	0	0	0	0	#N/A	#N/A	#N/A	#N/A
hsa-miR-3156-3p	0	0	0	0	0	0	#N/A	#N/A	#N/A	#N/A
hsa-miR-6763-3p	0	0	0	0	0	0	#N/A	#N/A	#N/A	#N/A
hsa-miR-6826-3p	0	0	0	0	0	0	#N/A	#N/A	#N/A	#N/A
hsa-miR-4497	0	0	0	0	0	0	#N/A	#N/A	#N/A	#N/A
hsa-miR-155-3p	0	0	0	0	0	0	#N/A	#N/A	#N/A	#N/A
hsa-miR-6792-3p	0	0	0	0	0	0	#N/A	#N/A	#N/A	#N/A
hsa-miR-6749-3p	0	0	0	0	0	0	#N/A	#N/A	#N/A	#N/A
hsa-miR-6780a-3p	0	0	0	0	0	0	#N/A	#N/A	#N/A	#N/A
hsa-miR-1200	0	0	0	0	0	0	#N/A	#N/A	#N/A	#N/A
hsa-miR-1343-3p	0	0	0	0	0	0	#N/A	#N/A	#N/A	#N/A
hsa-miR-4444	0	0	0	0	0	0	#N/A	#N/A	#N/A	#N/A
hsa-miR-6726-3p	0	0	0	0	0	0	#N/A	#N/A	#N/A	#N/A
hsa-miR-4665-3p	0	0	0	0	0	0	#N/A	#N/A	#N/A	#N/A
hsa-miR-1469	0	0	0	0	0	0	#N/A	#N/A	#N/A	#N/A
hsa-miR-6771-5p	0	0	0	0	0	0	#N/A	#N/A	#N/A	#N/A
hsa-miR-4750-5p	0	0	0	0	0	0	#N/A	#N/A	#N/A	#N/A
hsa-miR-6727-5p	0	0	0	0	0	0	#N/A	#N/A	#N/A	#N/A
hsa-miR-3677-3p	0	0	0	0	0	0	#N/A	#N/A	#N/A	#N/A
hsa-miR-518f-5p	0	0	0	0	0	0	#N/A	#N/A	#N/A	#N/A
hsa-miR-526a-5p	0	0	0	0	0	0	#N/A	#N/A	#N/A	#N/A
hsa-miR-519c-5p	0	0	0	0	0	0	#N/A	#N/A	#N/A	#N/A
hsa-miR-1287-3p	0	0	0	0	0	0	#N/A	#N/A	#N/A	#N/A
hsa-miR-1229-3p	0	0	0	0	0	0	#N/A	#N/A	#N/A	#N/A
hsa-miR-6867-3p	0	0	0	0	0	0	#N/A	#N/A	#N/A	#N/A
hsa-miR-4279	0	0	0	0	0	0	#N/A	#N/A	#N/A	#N/A
hsa-miR-10399-3p	0	0	0	0	0	0	#N/A	#N/A	#N/A	#N/A
hsa-miR-4684-5p	0	0	0	0	0	0	#N/A	#N/A	#N/A	#N/A
hsa-miR-3191-5p	0	0	0	0	0	0	#N/A	#N/A	#N/A	#N/A
hsa-miR-3192-3p	0	0	0	0	0	0	#N/A	#N/A	#N/A	#N/A
hsa-miR-4314	0	0	0	0	0	0	#N/A	#N/A	#N/A	#N/A
hsa-miR-526b-5p	0	0	0	0	0	0	#N/A	#N/A	#N/A	#N/A
hsa-miR-7158-3p	0	0	0	0	0	0	#N/A	#N/A	#N/A	#N/A
hsa-miR-573	0	0	0	0	0	0	#N/A	#N/A	#N/A	#N/A
hsa-miR-5585-3p	0	0	0	0	0	0	#N/A	#N/A	#N/A	#N/A
hsa-miR-3136-5p	0	0	0	0	0	0	#N/A	#N/A	#N/A	#N/A
hsa-miR-943	0	0	0	0	0	0	#N/A	#N/A	#N/A	#N/A
hsa-miR-3161	0	0	0	0	0	0	#N/A	#N/A	#N/A	#N/A
hsa-miR-518a-5p	0	0	0	0	0	0	#N/A	#N/A	#N/A	#N/A
hsa-miR-106a-3p	0	0	0	0	0	0	#N/A	#N/A	#N/A	#N/A
hsa-miR-1273h-3p	0	0	0	0	0	0	#N/A	#N/A	#N/A	#N/A
hsa-miR-3678-3p	0	0	0	0	0	0	#N/A	#N/A	#N/A	#N/A
hsa-miR-7156-3p	0	0	0	0	0	0	#N/A	#N/A	#N/A	#N/A
hsa-miR-6511b-5p	0	0	0	0	0	0	#N/A	#N/A	#N/A	#N/A
hsa-miR-192-3p	0	0	0	0	0	0	#N/A	#N/A	#N/A	#N/A
hsa-miR-12121	0	0	0	0	0	0	#N/A	#N/A	#N/A	#N/A
hsa-miR-3972	0	0	0	0	0	0	#N/A	#N/A	#N/A	#N/A
hsa-miR-4659a-5p	0	0	0	0	0	0	#N/A	#N/A	#N/A	#N/A
hsa-miR-3157-3p	0	0	0	0	0	0	#N/A	#N/A	#N/A	#N/A
hsa-miR-874-3p	0	0	0	0	0	0	#N/A	#N/A	#N/A	#N/A
hsa-miR-1269b	0	0	0	0	0	0	#N/A	#N/A	#N/A	#N/A
hsa-miR-1269a	0	0	0	0	0	0	#N/A	#N/A	#N/A	#N/A
hsa-miR-8058	0	0	0	0	0	0	#N/A	#N/A	#N/A	#N/A
hsa-miR-1270	0	0	0	0	0	0	#N/A	#N/A	#N/A	#N/A
hsa-miR-4309	0	0	0	0	0	0	#N/A	#N/A	#N/A	#N/A
hsa-miR-432-3p	0	0	0	0	0	0	#N/A	#N/A	#N/A	#N/A
hsa-miR-7150	0	0	0	0	0	0	#N/A	#N/A	#N/A	#N/A
hsa-miR-6878-3p	0	0	0	0	0	0	#N/A	#N/A	#N/A	#N/A
hsa-miR-4730	0	0	0	0	0	0	#N/A	#N/A	#N/A	#N/A
hsa-miR-6770-3p	0	0	0	0	0	0	#N/A	#N/A	#N/A	#N/A
hsa-miR-4298	0	0	0	0	0	0	#N/A	#N/A	#N/A	#N/A
hsa-miR-6788-5p	0	0	0	0	0	0	#N/A	#N/A	#N/A	#N/A
hsa-miR-6779-5p	0	0	0	0	0	0	#N/A	#N/A	#N/A	#N/A
hsa-miR-1273h-5p	0	0	0	0	0	0	#N/A	#N/A	#N/A	#N/A
hsa-miR-3689a-3p	0	0	0	0	0	0	#N/A	#N/A	#N/A	#N/A
hsa-miR-3689b-3p	0	0	0	0	0	0	#N/A	#N/A	#N/A	#N/A
hsa-miR-769-3p	0	0	0	0	0	0	#N/A	#N/A	#N/A	#N/A
hsa-miR-6724-5p	0	0	0	0	0	0	#N/A	#N/A	#N/A	#N/A
hsa-miR-10400-3p	0	0	0	0	0	0	#N/A	#N/A	#N/A	#N/A
hsa-miR-4674	0	0	0	0	0	0	#N/A	#N/A	#N/A	#N/A
hsa-miR-3150a-3p	0	0	0	0	0	0	#N/A	#N/A	#N/A	#N/A
hsa-miR-6763-5p	0	0	0	0	0	0	#N/A	#N/A	#N/A	#N/A
hsa-miR-4665-5p	0	0	0	0	0	0	#N/A	#N/A	#N/A	#N/A
hsa-miR-7109-5p	0	0	0	0	0	0	#N/A	#N/A	#N/A	#N/A
hsa-miR-6803-5p	0	0	0	0	0	0	#N/A	#N/A	#N/A	#N/A
hsa-miR-3170	0	0	0	0	0	0	#N/A	#N/A	#N/A	#N/A
hsa-miR-6736-5p	0	0	0	0	0	0	#N/A	#N/A	#N/A	#N/A
hsa-miR-4507	0	0	0	0	0	0	#N/A	#N/A	#N/A	#N/A
hsa-miR-150-3p	0	0	0	0	0	0	#N/A	#N/A	#N/A	#N/A
hsa-miR-2054	0	0	0	0	0	0	#N/A	#N/A	#N/A	#N/A
hsa-miR-675-3p	0	0	0	0	0	0	#N/A	#N/A	#N/A	#N/A
hsa-miR-676-3p	0	0	0	0	0	0	#N/A	#N/A	#N/A	#N/A
hsa-miR-4322	0	0	0	0	0	0	#N/A	#N/A	#N/A	#N/A
hsa-miR-4265	0	0	0	0	0	0	#N/A	#N/A	#N/A	#N/A
hsa-miR-7702	0	0	0	0	0	0	#N/A	#N/A	#N/A	#N/A
hsa-miR-8061	0	0	0	0	0	0	#N/A	#N/A	#N/A	#N/A
hsa-miR-6083	0	0	0	0	0	0	#N/A	#N/A	#N/A	#N/A
hsa-miR-491-3p	0	0	0	0	0	0	#N/A	#N/A	#N/A	#N/A
hsa-miR-3180-5p	0	0	0	0	0	0	#N/A	#N/A	#N/A	#N/A
hsa-miR-3679-3p	0	0	0	0	0	0	#N/A	#N/A	#N/A	#N/A
hsa-miR-718	0	0	0	0	0	0	#N/A	#N/A	#N/A	#N/A
hsa-miR-4664-3p	0	0	0	0	0	0	#N/A	#N/A	#N/A	#N/A
hsa-miR-1238-3p	0	0	0	0	0	0	#N/A	#N/A	#N/A	#N/A
hsa-miR-6809-3p	0	0	0	0	0	0	#N/A	#N/A	#N/A	#N/A
hsa-miR-4762-3p	0	0	0	0	0	0	#N/A	#N/A	#N/A	#N/A
hsa-miR-6738-3p	0	0	0	0	0	0	#N/A	#N/A	#N/A	#N/A
hsa-miR-578	0	0	0	0	0	0	#N/A	#N/A	#N/A	#N/A
hsa-miR-8081	0	0	0	0	0	0	#N/A	#N/A	#N/A	#N/A
hsa-miR-4776-3p	0	0	0	0	0	0	#N/A	#N/A	#N/A	#N/A
hsa-miR-5004-3p	0	0	0	0	0	0	#N/A	#N/A	#N/A	#N/A
hsa-miR-12133	0	0	0	0	0	0	#N/A	#N/A	#N/A	#N/A
hsa-miR-887-5p	0	0	0	0	0	0	#N/A	#N/A	#N/A	#N/A
hsa-miR-4260	0	0	0	0	0	0	#N/A	#N/A	#N/A	#N/A
hsa-miR-659-3p	0	0	0	0	0	0	#N/A	#N/A	#N/A	#N/A
hsa-miR-8055	0	0	0	0	0	0	#N/A	#N/A	#N/A	#N/A
hsa-miR-6885-3p	0	0	0	0	0	0	#N/A	#N/A	#N/A	#N/A
hsa-miR-548ad-3p	0	0	0	0	0	0	#N/A	#N/A	#N/A	#N/A
hsa-miR-4668-3p	0	0	0	0	0	0	#N/A	#N/A	#N/A	#N/A
hsa-miR-3662	0	0	0	0	0	0	#N/A	#N/A	#N/A	#N/A
hsa-miR-4311	0	0	0	0	0	0	#N/A	#N/A	#N/A	#N/A
hsa-miR-518a-3p	0	0	0	0	0	0	#N/A	#N/A	#N/A	#N/A
hsa-miR-526a-3p	0	0	0	0	0	0	#N/A	#N/A	#N/A	#N/A
hsa-miR-518f-3p	0	0	0	0	0	0	#N/A	#N/A	#N/A	#N/A
hsa-miR-548aq-5p	0	0	0	0	0	0	#N/A	#N/A	#N/A	#N/A
hsa-miR-8054	0	0	0	0	0	0	#N/A	#N/A	#N/A	#N/A
hsa-miR-526b-3p	0	0	0	0	0	0	#N/A	#N/A	#N/A	#N/A
hsa-miR-551b-5p	0	0	0	0	0	0	#N/A	#N/A	#N/A	#N/A
hsa-miR-614	0	0	0	0	0	0	#N/A	#N/A	#N/A	#N/A
hsa-miR-523-3p	0	0	0	0	0	0	#N/A	#N/A	#N/A	#N/A
hsa-miR-337-5p	0	0	0	0	0	0	#N/A	#N/A	#N/A	#N/A
hsa-miR-6750-3p	0	0	0	0	0	0	#N/A	#N/A	#N/A	#N/A
hsa-miR-4511	0	0	0	0	0	0	#N/A	#N/A	#N/A	#N/A
hsa-miR-6507-5p	0	0	0	0	0	0	#N/A	#N/A	#N/A	#N/A
hsa-miR-8087	0	0	0	0	0	0	#N/A	#N/A	#N/A	#N/A
hsa-miR-4426	0	0	0	0	0	0	#N/A	#N/A	#N/A	#N/A
hsa-miR-4647	0	0	0	0	0	0	#N/A	#N/A	#N/A	#N/A
hsa-miR-8080	0	0	0	0	0	0	#N/A	#N/A	#N/A	#N/A
hsa-miR-6816-3p	0	0	0	0	0	0	#N/A	#N/A	#N/A	#N/A
hsa-miR-3714	0	0	0	0	0	0	#N/A	#N/A	#N/A	#N/A
hsa-miR-525-3p	0	0	0	0	0	0	#N/A	#N/A	#N/A	#N/A
hsa-miR-524-3p	0	0	0	0	0	0	#N/A	#N/A	#N/A	#N/A
hsa-miR-373-3p	0	0	0	0	0	0	#N/A	#N/A	#N/A	#N/A
hsa-miR-12117	0	0	0	0	0	0	#N/A	#N/A	#N/A	#N/A
hsa-miR-595	0	0	0	0	0	0	#N/A	#N/A	#N/A	#N/A
hsa-miR-6082	0	0	0	0	0	0	#N/A	#N/A	#N/A	#N/A
hsa-miR-8084	0	0	0	0	0	0	#N/A	#N/A	#N/A	#N/A
hsa-miR-5583-3p	0	0	0	0	0	0	#N/A	#N/A	#N/A	#N/A
hsa-miR-3610	0	0	0	0	0	0	#N/A	#N/A	#N/A	#N/A
hsa-miR-10523-5p	0	0	0	0	0	0	#N/A	#N/A	#N/A	#N/A
hsa-miR-7849-3p	0	0	0	0	0	0	#N/A	#N/A	#N/A	#N/A
hsa-miR-4643	0	0	0	0	0	0	#N/A	#N/A	#N/A	#N/A
hsa-miR-602	0	0	0	0	0	0	#N/A	#N/A	#N/A	#N/A
hsa-miR-4704-5p	0	0	0	0	0	0	#N/A	#N/A	#N/A	#N/A
hsa-miR-4797-5p	0	0	0	0	0	0	#N/A	#N/A	#N/A	#N/A
hsa-miR-4262	0	0	0	0	0	0	#N/A	#N/A	#N/A	#N/A
hsa-miR-4523	0	0	0	0	0	0	#N/A	#N/A	#N/A	#N/A
hsa-miR-619-3p	0	0	0	0	0	0	#N/A	#N/A	#N/A	#N/A
hsa-miR-625-3p	0	0	0	0	0	0	#N/A	#N/A	#N/A	#N/A
hsa-miR-3680-5p	0	0	0	0	0	0	#N/A	#N/A	#N/A	#N/A
hsa-miR-888-3p	0	0	0	0	0	0	#N/A	#N/A	#N/A	#N/A
hsa-miR-3654	0	0	0	0	0	0	#N/A	#N/A	#N/A	#N/A
hsa-miR-12126	0	0	0	0	0	0	#N/A	#N/A	#N/A	#N/A
hsa-miR-5680	0	0	0	0	0	0	#N/A	#N/A	#N/A	#N/A
hsa-miR-4524b-3p	0	0	0	0	0	0	#N/A	#N/A	#N/A	#N/A
hsa-miR-4463	0	0	0	0	0	0	#N/A	#N/A	#N/A	#N/A
hsa-miR-2278	0	0	0	0	0	0	#N/A	#N/A	#N/A	#N/A
hsa-miR-6859-5p	0	0	0	0	0	0	#N/A	#N/A	#N/A	#N/A
hsa-miR-3908	0	0	0	0	0	0	#N/A	#N/A	#N/A	#N/A
hsa-miR-4690-5p	0	0	0	0	0	0	#N/A	#N/A	#N/A	#N/A
hsa-miR-4676-5p	0	0	0	0	0	0	#N/A	#N/A	#N/A	#N/A
hsa-miR-575	0	0	0	0	0	0	#N/A	#N/A	#N/A	#N/A
hsa-miR-6769a-3p	0	0	0	0	0	0	#N/A	#N/A	#N/A	#N/A
hsa-miR-590-5p	0	0	0	0	0	0	#N/A	#N/A	#N/A	#N/A
hsa-miR-4538	0	0	0	0	0	0	#N/A	#N/A	#N/A	#N/A
hsa-miR-4453	0	0	0	0	0	0	#N/A	#N/A	#N/A	#N/A
hsa-miR-208a-5p	0	0	0	0	0	0	#N/A	#N/A	#N/A	#N/A
hsa-miR-4496	0	0	0	0	0	0	#N/A	#N/A	#N/A	#N/A
hsa-miR-12124	0	0	0	0	0	0	#N/A	#N/A	#N/A	#N/A
hsa-miR-1910-3p	0	0	0	0	0	0	#N/A	#N/A	#N/A	#N/A
hsa-miR-4478	0	0	0	0	0	0	#N/A	#N/A	#N/A	#N/A
hsa-miR-3929	0	0	0	0	0	0	#N/A	#N/A	#N/A	#N/A
hsa-miR-7843-5p	0	0	0	0	0	0	#N/A	#N/A	#N/A	#N/A
hsa-miR-4632-5p	0	0	0	0	0	0	#N/A	#N/A	#N/A	#N/A
hsa-miR-4761-3p	0	0	0	0	0	0	#N/A	#N/A	#N/A	#N/A
hsa-miR-3141	0	0	0	0	0	0	#N/A	#N/A	#N/A	#N/A
hsa-miR-1182	0	0	0	0	0	0	#N/A	#N/A	#N/A	#N/A
hsa-miR-4748	0	0	0	0	0	0	#N/A	#N/A	#N/A	#N/A
hsa-miR-515-3p	0	0	0	0	0	0	#N/A	#N/A	#N/A	#N/A
hsa-miR-6849-5p	0	0	0	0	0	0	#N/A	#N/A	#N/A	#N/A
hsa-miR-1296-3p	0	0	0	0	0	0	#N/A	#N/A	#N/A	#N/A
hsa-miR-4280	0	0	0	0	0	0	#N/A	#N/A	#N/A	#N/A
hsa-miR-3168	0	0	0	0	0	0	#N/A	#N/A	#N/A	#N/A
hsa-miR-3074-3p	0	0	0	0	0	0	#N/A	#N/A	#N/A	#N/A
hsa-miR-6074	0	0	0	0	0	0	#N/A	#N/A	#N/A	#N/A
hsa-miR-7151-5p	0	0	0	0	0	0	#N/A	#N/A	#N/A	#N/A
hsa-miR-6866-3p	0	0	0	0	0	0	#N/A	#N/A	#N/A	#N/A
hsa-miR-1285-5p	0	0	0	0	0	0	#N/A	#N/A	#N/A	#N/A
hsa-miR-556-5p	0	0	0	0	0	0	#N/A	#N/A	#N/A	#N/A
hsa-miR-1272	0	0	0	0	0	0	#N/A	#N/A	#N/A	#N/A
hsa-miR-1322	0	0	0	0	0	0	#N/A	#N/A	#N/A	#N/A
hsa-miR-4787-3p	0	0	0	0	0	0	#N/A	#N/A	#N/A	#N/A
hsa-miR-758-5p	0	0	0	0	0	0	#N/A	#N/A	#N/A	#N/A
hsa-miR-12129	0	0	0	0	0	0	#N/A	#N/A	#N/A	#N/A
hsa-miR-205-3p	0	0	0	0	0	0	#N/A	#N/A	#N/A	#N/A
hsa-miR-500b-3p	0	0	0	0	0	0	#N/A	#N/A	#N/A	#N/A
hsa-miR-3919	0	0	0	0	0	0	#N/A	#N/A	#N/A	#N/A
hsa-miR-759	0	0	0	0	0	0	#N/A	#N/A	#N/A	#N/A
hsa-miR-1288-5p	0	0	0	0	0	0	#N/A	#N/A	#N/A	#N/A
hsa-miR-922	0	0	0	0	0	0	#N/A	#N/A	#N/A	#N/A
hsa-miR-761	0	0	0	0	0	0	#N/A	#N/A	#N/A	#N/A
hsa-miR-4310	0	0	0	0	0	0	#N/A	#N/A	#N/A	#N/A
hsa-miR-4690-3p	0	0	0	0	0	0	#N/A	#N/A	#N/A	#N/A
hsa-miR-873-5p	0	0	0	0	0	0	#N/A	#N/A	#N/A	#N/A
hsa-miR-4436a	0	0	0	0	0	0	#N/A	#N/A	#N/A	#N/A
hsa-miR-4269	0	0	0	0	0	0	#N/A	#N/A	#N/A	#N/A
hsa-miR-211-3p	0	0	0	0	0	0	#N/A	#N/A	#N/A	#N/A
hsa-miR-764	0	0	0	0	0	0	#N/A	#N/A	#N/A	#N/A
hsa-miR-3129-5p	0	0	0	0	0	0	#N/A	#N/A	#N/A	#N/A
hsa-miR-5693	0	0	0	0	0	0	#N/A	#N/A	#N/A	#N/A
hsa-miR-4277	0	0	0	0	0	0	#N/A	#N/A	#N/A	#N/A
hsa-miR-4289	0	0	0	0	0	0	#N/A	#N/A	#N/A	#N/A
hsa-miR-186-3p	0	0	0	0	0	0	#N/A	#N/A	#N/A	#N/A
hsa-miR-6840-3p	0	0	0	0	0	0	#N/A	#N/A	#N/A	#N/A
hsa-miR-4707-5p	0	0	0	0	0	0	#N/A	#N/A	#N/A	#N/A
hsa-miR-5587-3p	0	0	0	0	0	0	#N/A	#N/A	#N/A	#N/A
hsa-miR-331-3p	0	0	0	0	0	0	#N/A	#N/A	#N/A	#N/A
hsa-miR-4740-3p	0	0	0	0	0	0	#N/A	#N/A	#N/A	#N/A
hsa-miR-1471	0	0	0	0	0	0	#N/A	#N/A	#N/A	#N/A
hsa-miR-10398-3p	0	0	0	0	0	0	#N/A	#N/A	#N/A	#N/A
hsa-miR-1470	0	0	0	0	0	0	#N/A	#N/A	#N/A	#N/A
hsa-miR-2276-5p	0	0	0	0	0	0	#N/A	#N/A	#N/A	#N/A
hsa-miR-345-3p	0	0	0	0	0	0	#N/A	#N/A	#N/A	#N/A
hsa-miR-146b-3p	0	0	0	0	0	0	#N/A	#N/A	#N/A	#N/A
hsa-miR-4442	0	0	0	0	0	0	#N/A	#N/A	#N/A	#N/A
hsa-miR-6784-5p	0	0	0	0	0	0	#N/A	#N/A	#N/A	#N/A
hsa-miR-3927-5p	0	0	0	0	0	0	#N/A	#N/A	#N/A	#N/A
hsa-miR-3183	0	0	0	0	0	0	#N/A	#N/A	#N/A	#N/A
hsa-miR-4254	0	0	0	0	0	0	#N/A	#N/A	#N/A	#N/A
hsa-miR-320a-5p	0	0	0	0	0	0	#N/A	#N/A	#N/A	#N/A
hsa-miR-551a	0	0	0	0	0	0	#N/A	#N/A	#N/A	#N/A
hsa-miR-551b-3p	0	0	0	0	0	0	#N/A	#N/A	#N/A	#N/A
hsa-miR-375-5p	0	0	0	0	0	0	#N/A	#N/A	#N/A	#N/A
hsa-miR-4431	0	0	0	0	0	0	#N/A	#N/A	#N/A	#N/A
hsa-miR-611	0	0	0	0	0	0	#N/A	#N/A	#N/A	#N/A
hsa-miR-6825-3p	0	0	0	0	0	0	#N/A	#N/A	#N/A	#N/A
hsa-miR-10392-5p	0	0	0	0	0	0	#N/A	#N/A	#N/A	#N/A
hsa-miR-6125	0	0	0	0	0	0	#N/A	#N/A	#N/A	#N/A
hsa-miR-5739	0	0	0	0	0	0	#N/A	#N/A	#N/A	#N/A
hsa-miR-4285	0	0	0	0	0	0	#N/A	#N/A	#N/A	#N/A
hsa-miR-4508	0	0	0	0	0	0	#N/A	#N/A	#N/A	#N/A
hsa-miR-4787-5p	0	0	0	0	0	0	#N/A	#N/A	#N/A	#N/A
hsa-miR-598-5p	0	0	0	0	0	0	#N/A	#N/A	#N/A	#N/A
hsa-miR-6786-5p	0	0	0	0	0	0	#N/A	#N/A	#N/A	#N/A
hsa-miR-4521	0	0	0	0	0	0	#N/A	#N/A	#N/A	#N/A
hsa-miR-138-1-3p	0	0	0	0	0	0	#N/A	#N/A	#N/A	#N/A
hsa-miR-554	0	0	0	0	0	0	#N/A	#N/A	#N/A	#N/A
hsa-miR-138-2-3p	0	0	0	0	0	0	#N/A	#N/A	#N/A	#N/A
hsa-miR-4518	0	0	0	0	0	0	#N/A	#N/A	#N/A	#N/A
hsa-miR-6870-3p	0	0	0	0	0	0	#N/A	#N/A	#N/A	#N/A
hsa-miR-4469	0	0	0	0	0	0	#N/A	#N/A	#N/A	#N/A
hsa-miR-3917	0	0	0	0	0	0	#N/A	#N/A	#N/A	#N/A
hsa-miR-301b-5p	0	0	0	0	0	0	#N/A	#N/A	#N/A	#N/A
hsa-miR-301a-5p	0	0	0	0	0	0	#N/A	#N/A	#N/A	#N/A
hsa-miR-130a-5p	0	0	0	0	0	0	#N/A	#N/A	#N/A	#N/A
hsa-miR-4539	0	0	0	0	0	0	#N/A	#N/A	#N/A	#N/A
hsa-miR-4526	0	0	0	0	0	0	#N/A	#N/A	#N/A	#N/A
hsa-miR-4502	0	0	0	0	0	0	#N/A	#N/A	#N/A	#N/A
hsa-miR-3130-3p	0	0	0	0	0	0	#N/A	#N/A	#N/A	#N/A
hsa-miR-4734	0	0	0	0	0	0	#N/A	#N/A	#N/A	#N/A
hsa-miR-612	0	0	0	0	0	0	#N/A	#N/A	#N/A	#N/A
hsa-miR-4486	0	0	0	0	0	0	#N/A	#N/A	#N/A	#N/A
hsa-miR-3663-5p	0	0	0	0	0	0	#N/A	#N/A	#N/A	#N/A
hsa-miR-4299	0	0	0	0	0	0	#N/A	#N/A	#N/A	#N/A
hsa-miR-548q	0	0	0	0	0	0	#N/A	#N/A	#N/A	#N/A
hsa-miR-3182	0	0	0	0	0	0	#N/A	#N/A	#N/A	#N/A
hsa-miR-3655	0	0	0	0	0	0	#N/A	#N/A	#N/A	#N/A
hsa-miR-1180-5p	0	0	0	0	0	0	#N/A	#N/A	#N/A	#N/A
hsa-miR-539-5p	0	0	0	0	0	0	#N/A	#N/A	#N/A	#N/A
hsa-miR-873-3p	0	0	0	0	0	0	#N/A	#N/A	#N/A	#N/A
hsa-miR-3928-3p	0	0	0	0	0	0	#N/A	#N/A	#N/A	#N/A
hsa-miR-6089	0	0	0	0	0	0	#N/A	#N/A	#N/A	#N/A
hsa-miR-3197	0	0	0	0	0	0	#N/A	#N/A	#N/A	#N/A
hsa-miR-1914-3p	0	0	0	0	0	0	#N/A	#N/A	#N/A	#N/A
hsa-miR-6086	0	0	0	0	0	0	#N/A	#N/A	#N/A	#N/A
hsa-miR-4481	0	0	0	0	0	0	#N/A	#N/A	#N/A	#N/A
hsa-miR-144-5p	0	0	0	0	0	0	#N/A	#N/A	#N/A	#N/A
hsa-miR-4454	0	0	0	0	0	0	#N/A	#N/A	#N/A	#N/A
hsa-miR-4534	0	0	0	0	0	0	#N/A	#N/A	#N/A	#N/A
hsa-miR-8069	0	0	0	0	0	0	#N/A	#N/A	#N/A	#N/A
hsa-miR-4722-5p	0	0	0	0	0	0	#N/A	#N/A	#N/A	#N/A
hsa-miR-657	0	0	0	0	0	0	#N/A	#N/A	#N/A	#N/A
hsa-miR-4252	0	0	0	0	0	0	#N/A	#N/A	#N/A	#N/A
hsa-miR-3194-5p	0	0	0	0	0	0	#N/A	#N/A	#N/A	#N/A
hsa-miR-10396b-3p	0	0	0	0	0	0	#N/A	#N/A	#N/A	#N/A
hsa-miR-10396a-3p	0	0	0	0	0	0	#N/A	#N/A	#N/A	#N/A
hsa-miR-4312	0	0	0	0	0	0	#N/A	#N/A	#N/A	#N/A
hsa-miR-1273c	0	0	0	0	0	0	#N/A	#N/A	#N/A	#N/A
hsa-miR-4783-5p	0	0	0	0	0	0	#N/A	#N/A	#N/A	#N/A
hsa-miR-658	0	0	0	0	0	0	#N/A	#N/A	#N/A	#N/A
hsa-miR-3960	0	0	0	0	0	0	#N/A	#N/A	#N/A	#N/A
hsa-miR-8072	0	0	0	0	0	0	#N/A	#N/A	#N/A	#N/A
hsa-miR-10396a-5p	0	0	0	0	0	0	#N/A	#N/A	#N/A	#N/A
hsa-miR-187-5p	0	0	0	0	0	0	#N/A	#N/A	#N/A	#N/A
hsa-miR-621	0	0	0	0	0	0	#N/A	#N/A	#N/A	#N/A
hsa-miR-7158-5p	0	0	0	0	0	0	#N/A	#N/A	#N/A	#N/A
hsa-miR-6847-3p	0	0	0	0	0	0	#N/A	#N/A	#N/A	#N/A
hsa-miR-4268	0	0	0	0	0	0	#N/A	#N/A	#N/A	#N/A
hsa-miR-4448	0	0	0	0	0	0	#N/A	#N/A	#N/A	#N/A
hsa-miR-8077	0	0	0	0	0	0	#N/A	#N/A	#N/A	#N/A
hsa-miR-5589-5p	0	0	0	0	0	0	#N/A	#N/A	#N/A	#N/A
hsa-miR-4327	0	0	0	0	0	0	#N/A	#N/A	#N/A	#N/A
hsa-miR-3160-5p	0	0	0	0	0	0	#N/A	#N/A	#N/A	#N/A
hsa-miR-6124	0	0	0	0	0	0	#N/A	#N/A	#N/A	#N/A
hsa-miR-6077	0	0	0	0	0	0	#N/A	#N/A	#N/A	#N/A
hsa-miR-3619-3p	0	0	0	0	0	0	#N/A	#N/A	#N/A	#N/A
hsa-miR-711	0	0	0	0	0	0	#N/A	#N/A	#N/A	#N/A
hsa-miR-6503-3p	0	0	0	0	0	0	#N/A	#N/A	#N/A	#N/A
hsa-miR-4516	0	0	0	0	0	0	#N/A	#N/A	#N/A	#N/A
hsa-miR-3689d	0	0	0	0	0	0	#N/A	#N/A	#N/A	#N/A
hsa-miR-4294	0	0	0	0	0	0	#N/A	#N/A	#N/A	#N/A
hsa-miR-504-3p	0	0	0	0	0	0	#N/A	#N/A	#N/A	#N/A
hsa-miR-3201	0	0	0	0	0	0	#N/A	#N/A	#N/A	#N/A
hsa-miR-1193	0	0	0	0	0	0	#N/A	#N/A	#N/A	#N/A
hsa-miR-4320	0	0	0	0	0	0	#N/A	#N/A	#N/A	#N/A
hsa-miR-6744-3p	0	0	0	0	0	0	#N/A	#N/A	#N/A	#N/A
hsa-miR-6069	0	0	0	0	0	0	#N/A	#N/A	#N/A	#N/A
hsa-miR-4284	0	0	0	0	0	0	#N/A	#N/A	#N/A	#N/A
hsa-miR-5787	0	0	0	0	0	0	#N/A	#N/A	#N/A	#N/A
hsa-miR-3153	0	0	0	0	0	0	#N/A	#N/A	#N/A	#N/A
hsa-miR-8059	0	0	0	0	0	0	#N/A	#N/A	#N/A	#N/A
hsa-miR-6090	0	0	0	0	0	0	#N/A	#N/A	#N/A	#N/A
hsa-miR-920	0	0	0	0	0	0	#N/A	#N/A	#N/A	#N/A
hsa-miR-6799-5p	0	0	0	0	0	0	#N/A	#N/A	#N/A	#N/A
hsa-miR-2861	0	0	0	0	0	0	#N/A	#N/A	#N/A	#N/A
hsa-miR-3178	0	0	0	0	0	0	#N/A	#N/A	#N/A	#N/A
hsa-miR-4492	0	0	0	0	0	0	#N/A	#N/A	#N/A	#N/A
hsa-miR-762	0	0	0	0	0	0	#N/A	#N/A	#N/A	#N/A
hsa-miR-4675	0	0	0	0	0	0	#N/A	#N/A	#N/A	#N/A
hsa-miR-4271	0	0	0	0	0	0	#N/A	#N/A	#N/A	#N/A
hsa-miR-128-2-5p	0	0	0	0	0	0	#N/A	#N/A	#N/A	#N/A
hsa-miR-4525	0	0	0	0	0	0	#N/A	#N/A	#N/A	#N/A
hsa-miR-328-5p	0	0	0	0	0	0	#N/A	#N/A	#N/A	#N/A
hsa-miR-6752-5p	0	0	0	0	0	0	#N/A	#N/A	#N/A	#N/A
hsa-miR-4483	0	0	0	0	0	0	#N/A	#N/A	#N/A	#N/A
hsa-miR-23a-5p	0	0	0	0	0	0	#N/A	#N/A	#N/A	#N/A
hsa-miR-4281	0	0	0	0	0	0	#N/A	#N/A	#N/A	#N/A
hsa-miR-4710	0	0	0	0	0	0	#N/A	#N/A	#N/A	#N/A
hsa-miR-4466	0	0	0	0	0	0	#N/A	#N/A	#N/A	#N/A
hsa-miR-92a-2-5p	0	0	0	0	0	0	#N/A	#N/A	#N/A	#N/A
hsa-miR-5087	0	0	0	0	0	0	#N/A	#N/A	#N/A	#N/A
hsa-miR-376a-2-5p	0	0	0	0	0	0	#N/A	#N/A	#N/A	#N/A
hsa-miR-6073	0	0	0	0	0	0	#N/A	#N/A	#N/A	#N/A
hsa-miR-3713	0	0	0	0	0	0	#N/A	#N/A	#N/A	#N/A
hsa-miR-198	0	0	0	0	0	0	#N/A	#N/A	#N/A	#N/A
hsa-miR-489-5p	0	0	0	0	0	0	#N/A	#N/A	#N/A	#N/A
hsa-miR-8078	0	0	0	0	0	0	#N/A	#N/A	#N/A	#N/A
hsa-miR-4316	0	0	0	0	0	0	#N/A	#N/A	#N/A	#N/A
hsa-miR-143-5p	0	0	0	0	0	0	#N/A	#N/A	#N/A	#N/A
hsa-miR-376c-5p	0	0	0	0	0	0	#N/A	#N/A	#N/A	#N/A
hsa-miR-663b	0	0	0	0	0	0	#N/A	#N/A	#N/A	#N/A
hsa-miR-4769-5p	0	0	0	0	0	0	#N/A	#N/A	#N/A	#N/A
hsa-miR-3151-5p	0	0	0	0	0	0	#N/A	#N/A	#N/A	#N/A
hsa-miR-4447	0	0	0	0	0	0	#N/A	#N/A	#N/A	#N/A
hsa-miR-4472	0	0	0	0	0	0	#N/A	#N/A	#N/A	#N/A
hsa-miR-642b-5p	0	0	0	0	0	0	#N/A	#N/A	#N/A	#N/A
hsa-miR-2116-5p	0	0	0	0	0	0	#N/A	#N/A	#N/A	#N/A
hsa-miR-3147	0	0	0	0	0	0	#N/A	#N/A	#N/A	#N/A
hsa-miR-6792-5p	0	0	0	0	0	0	#N/A	#N/A	#N/A	#N/A
hsa-miR-6892-5p	0	0	0	0	0	0	#N/A	#N/A	#N/A	#N/A
hsa-miR-4724-3p	0	0	0	0	0	0	#N/A	#N/A	#N/A	#N/A
hsa-miR-376a-5p	0	0	0	0	0	0	#N/A	#N/A	#N/A	#N/A
hsa-miR-5682	0	0	0	0	0	0	#N/A	#N/A	#N/A	#N/A
hsa-miR-6824-5p	0	0	0	0	0	0	#N/A	#N/A	#N/A	#N/A
hsa-miR-6789-5p	0	0	0	0	0	0	#N/A	#N/A	#N/A	#N/A
hsa-miR-6800-5p	0	0	0	0	0	0	#N/A	#N/A	#N/A	#N/A
hsa-miR-4789-5p	0	0	0	0	0	0	#N/A	#N/A	#N/A	#N/A
hsa-miR-4420	0	0	0	0	0	0	#N/A	#N/A	#N/A	#N/A
hsa-miR-4436b-5p	0	0	0	0	0	0	#N/A	#N/A	#N/A	#N/A
hsa-miR-642a-5p	0	0	0	0	0	0	#N/A	#N/A	#N/A	#N/A
hsa-miR-572	0	0	0	0	0	0	#N/A	#N/A	#N/A	#N/A
hsa-miR-5571-3p	0	0	0	0	0	0	#N/A	#N/A	#N/A	#N/A
hsa-miR-4691-5p	0	0	0	0	0	0	#N/A	#N/A	#N/A	#N/A
hsa-miR-11181-5p	0	0	0	0	0	0	#N/A	#N/A	#N/A	#N/A
hsa-miR-887-3p	0	0	0	0	0	0	#N/A	#N/A	#N/A	#N/A
hsa-miR-6126	0	0	0	0	0	0	#N/A	#N/A	#N/A	#N/A
hsa-miR-183-3p	0	0	0	0	0	0	#N/A	#N/A	#N/A	#N/A
hsa-miR-489-3p	0	0	0	0	0	0	#N/A	#N/A	#N/A	#N/A
hsa-miR-4439	0	0	0	0	0	0	#N/A	#N/A	#N/A	#N/A
hsa-miR-6864-3p	0	0	0	0	0	0	#N/A	#N/A	#N/A	#N/A
hsa-miR-6807-5p	0	0	0	0	0	0	#N/A	#N/A	#N/A	#N/A
hsa-miR-1224-5p	0	0	0	0	0	0	#N/A	#N/A	#N/A	#N/A
hsa-miR-6858-5p	0	0	0	0	0	0	#N/A	#N/A	#N/A	#N/A
hsa-miR-6765-5p	0	0	0	0	0	0	#N/A	#N/A	#N/A	#N/A
hsa-miR-6834-5p	0	0	0	0	0	0	#N/A	#N/A	#N/A	#N/A
hsa-miR-1226-5p	0	0	0	0	0	0	#N/A	#N/A	#N/A	#N/A
hsa-miR-6869-5p	0	0	0	0	0	0	#N/A	#N/A	#N/A	#N/A
hsa-miR-937-5p	0	0	0	0	0	0	#N/A	#N/A	#N/A	#N/A
hsa-miR-627-5p	0	0	0	0	0	0	#N/A	#N/A	#N/A	#N/A
hsa-miR-1238-5p	0	0	0	0	0	0	#N/A	#N/A	#N/A	#N/A
hsa-miR-4758-5p	0	0	0	0	0	0	#N/A	#N/A	#N/A	#N/A
hsa-miR-4658	0	0	0	0	0	0	#N/A	#N/A	#N/A	#N/A
hsa-miR-6790-5p	0	0	0	0	0	0	#N/A	#N/A	#N/A	#N/A
hsa-miR-10395-5p	0	0	0	0	0	0	#N/A	#N/A	#N/A	#N/A
hsa-miR-548aw	0	0	0	0	0	0	#N/A	#N/A	#N/A	#N/A
hsa-miR-5011-3p	0	0	0	0	0	0	#N/A	#N/A	#N/A	#N/A
hsa-miR-33b-5p	0	0	0	0	0	0	#N/A	#N/A	#N/A	#N/A
hsa-miR-4715-3p	0	0	0	0	0	0	#N/A	#N/A	#N/A	#N/A
hsa-miR-1202	0	0	0	0	0	0	#N/A	#N/A	#N/A	#N/A
hsa-miR-6850-5p	0	0	0	0	0	0	#N/A	#N/A	#N/A	#N/A
hsa-miR-6821-5p	0	0	0	0	0	0	#N/A	#N/A	#N/A	#N/A
hsa-miR-3977	0	0	0	0	0	0	#N/A	#N/A	#N/A	#N/A
hsa-miR-3978	0	0	0	0	0	0	#N/A	#N/A	#N/A	#N/A
hsa-miR-4776-5p	0	0	0	0	0	0	#N/A	#N/A	#N/A	#N/A
hsa-miR-4535	0	0	0	0	0	0	#N/A	#N/A	#N/A	#N/A
hsa-miR-3198	0	0	0	0	0	0	#N/A	#N/A	#N/A	#N/A
hsa-miR-8057	0	0	0	0	0	0	#N/A	#N/A	#N/A	#N/A
hsa-miR-647	0	0	0	0	0	0	#N/A	#N/A	#N/A	#N/A
hsa-miR-5089-5p	0	0	0	0	0	0	#N/A	#N/A	#N/A	#N/A
hsa-miR-1228-5p	0	9.3875	0	0	0	0	#N/A	#N/A	#N/A	#N/A
hsa-miR-3620-5p	0	0	0	0	0	0	#N/A	#N/A	#N/A	#N/A
hsa-miR-1227-5p	0	0	0	0	0	0	#N/A	#N/A	#N/A	#N/A
hsa-miR-1275	0	0	0	0	0	0	#N/A	#N/A	#N/A	#N/A
hsa-miR-1225-5p	0	0	0	0	0	0	#N/A	#N/A	#N/A	#N/A
hsa-miR-1229-5p	0	0	0	0	0	0	#N/A	#N/A	#N/A	#N/A
hsa-miR-6741-5p	0	0	0	0	0	0	#N/A	#N/A	#N/A	#N/A
hsa-miR-3940-5p	0	0	0	0	0	0	#N/A	#N/A	#N/A	#N/A
hsa-miR-6848-3p	0	0	0	0	0	0	#N/A	#N/A	#N/A	#N/A
hsa-miR-632	0	0	0	0	0	0	#N/A	#N/A	#N/A	#N/A
hsa-miR-1231	0	0	0	0	0	0	#N/A	#N/A	#N/A	#N/A
hsa-miR-511-5p	0	0	0	0	0	0	#N/A	#N/A	#N/A	#N/A
hsa-miR-6808-3p	0	0	0	0	0	0	#N/A	#N/A	#N/A	#N/A
hsa-miR-147b-3p	0	0	0	0	0	0	#N/A	#N/A	#N/A	#N/A
hsa-miR-6833-5p	0	0	0	0	0	0	#N/A	#N/A	#N/A	#N/A
hsa-miR-7108-5p	0	0	0	0	0	0	#N/A	#N/A	#N/A	#N/A
hsa-miR-147a	0	0	0	0	0	0	#N/A	#N/A	#N/A	#N/A
hsa-miR-2053	0	0	0	0	0	0	#N/A	#N/A	#N/A	#N/A
hsa-miR-4273	0	0	0	0	0	0	#N/A	#N/A	#N/A	#N/A
hsa-miR-653-5p	0	0	0	0	0	0	#N/A	#N/A	#N/A	#N/A
hsa-miR-2909	0	0	0	0	0	0	#N/A	#N/A	#N/A	#N/A
hsa-miR-607	0	0	0	0	0	0	#N/A	#N/A	#N/A	#N/A
hsa-miR-3692-3p	0	0	0	0	0	0	#N/A	#N/A	#N/A	#N/A
hsa-miR-3074-5p	0	0	0	0	0	0	#N/A	#N/A	#N/A	#N/A
hsa-miR-629-3p	0	0	0	0	0	0	#N/A	#N/A	#N/A	#N/A
hsa-miR-4652-3p	0	0	0	0	0	0	#N/A	#N/A	#N/A	#N/A
hsa-miR-3122	0	0	0	0	0	0	#N/A	#N/A	#N/A	#N/A
hsa-miR-5572	0	0	0	0	0	0	#N/A	#N/A	#N/A	#N/A
hsa-miR-599	0	0	0	0	0	0	#N/A	#N/A	#N/A	#N/A
hsa-miR-552-5p	0	0	0	0	0	0	#N/A	#N/A	#N/A	#N/A
hsa-miR-557	0	0	0	0	0	0	#N/A	#N/A	#N/A	#N/A
hsa-miR-7850-5p	0	0	0	0	0	0	#N/A	#N/A	#N/A	#N/A
hsa-miR-2681-5p	0	0	0	0	0	0	#N/A	#N/A	#N/A	#N/A
hsa-miR-548x-3p	0	0	0	0	0	0	#N/A	#N/A	#N/A	#N/A
hsa-miR-548aj-3p	0	0	0	0	0	0	#N/A	#N/A	#N/A	#N/A
hsa-miR-548as-3p	0	0	0	0	0	0	#N/A	#N/A	#N/A	#N/A
hsa-miR-548ar-3p	0	0	0	0	0	0	#N/A	#N/A	#N/A	#N/A
hsa-miR-5582-3p	0	0	0	0	0	0	#N/A	#N/A	#N/A	#N/A
hsa-miR-4282	0	0	0	0	0	0	#N/A	#N/A	#N/A	#N/A
hsa-miR-3133	0	0	0	0	0	0	#N/A	#N/A	#N/A	#N/A
hsa-miR-7161-5p	0	0	0	0	0	0	#N/A	#N/A	#N/A	#N/A
hsa-miR-1276	0	0	0	0	0	0	#N/A	#N/A	#N/A	#N/A
hsa-miR-12135	0	0	0	0	0	0	#N/A	#N/A	#N/A	#N/A
hsa-miR-559	0	0	0	0	0	0	#N/A	#N/A	#N/A	#N/A
hsa-miR-4796-3p	0	0	0	0	0	0	#N/A	#N/A	#N/A	#N/A
hsa-miR-3121-3p	0	0	0	0	0	0	#N/A	#N/A	#N/A	#N/A
hsa-miR-605-5p	0	0	0	0	0	0	#N/A	#N/A	#N/A	#N/A
hsa-miR-513c-3p	0	0	0	0	0	0	#N/A	#N/A	#N/A	#N/A
hsa-miR-513a-3p	0	0	0	0	0	0	#N/A	#N/A	#N/A	#N/A
hsa-miR-5688	0	0	0	0	0	0	#N/A	#N/A	#N/A	#N/A
hsa-miR-141-3p	0	0	0	0	0	0	#N/A	#N/A	#N/A	#N/A
hsa-miR-4803	0	0	0	0	0	0	#N/A	#N/A	#N/A	#N/A
hsa-miR-6732-3p	0	0	0	0	0	0	#N/A	#N/A	#N/A	#N/A
hsa-miR-3912-3p	0	0	0	0	0	0	#N/A	#N/A	#N/A	#N/A
hsa-miR-4485-3p	0	0	0	0	0	0	#N/A	#N/A	#N/A	#N/A
hsa-miR-12120	0	0	0	0	0	0	#N/A	#N/A	#N/A	#N/A
hsa-miR-6891-5p	0	0	0	0	0	0	#N/A	#N/A	#N/A	#N/A
hsa-miR-506-3p	0	0	0	0	0	0	#N/A	#N/A	#N/A	#N/A
hsa-miR-124-3p	0	0	0	0	0	0	#N/A	#N/A	#N/A	#N/A
hsa-miR-3936	0	0	0	0	0	0	#N/A	#N/A	#N/A	#N/A
hsa-miR-18b-5p	0	0	0	0	0	0	#N/A	#N/A	#N/A	#N/A
hsa-miR-302e	0	0	0	0	0	0	#N/A	#N/A	#N/A	#N/A
hsa-miR-302c-3p	0	0	0	0	0	0	#N/A	#N/A	#N/A	#N/A
hsa-miR-302b-3p	0	0	0	0	0	0	#N/A	#N/A	#N/A	#N/A
hsa-miR-500a-5p	0	0	0	0	0	0	#N/A	#N/A	#N/A	#N/A
hsa-miR-216a-5p	0	0	0	0	0	0	#N/A	#N/A	#N/A	#N/A
hsa-miR-580-5p	0	0	0	0	0	0	#N/A	#N/A	#N/A	#N/A
hsa-miR-5700	0	0	0	0	0	0	#N/A	#N/A	#N/A	#N/A
hsa-miR-302f	0	0	0	0	0	0	#N/A	#N/A	#N/A	#N/A
hsa-miR-6882-5p	0	0	0	0	0	0	#N/A	#N/A	#N/A	#N/A
hsa-miR-4801	0	0	0	0	0	0	#N/A	#N/A	#N/A	#N/A
hsa-miR-5683	0	0	0	0	0	0	#N/A	#N/A	#N/A	#N/A
hsa-miR-6856-3p	0	0	0	0	0	0	#N/A	#N/A	#N/A	#N/A
hsa-miR-4802-3p	0	0	0	0	0	0	#N/A	#N/A	#N/A	#N/A
hsa-miR-6512-5p	0	0	0	0	0	0	#N/A	#N/A	#N/A	#N/A
hsa-miR-1912-3p	0	0	0	0	0	0	#N/A	#N/A	#N/A	#N/A
hsa-miR-3130-5p	0	0	0	0	0	0	#N/A	#N/A	#N/A	#N/A
hsa-miR-7851-3p	0	0	0	0	0	0	#N/A	#N/A	#N/A	#N/A
hsa-miR-3939	0	0	0	0	0	0	#N/A	#N/A	#N/A	#N/A
hsa-miR-1277-3p	0	0	0	0	0	0	#N/A	#N/A	#N/A	#N/A
hsa-miR-4637	0	0	0	0	0	0	#N/A	#N/A	#N/A	#N/A
hsa-miR-888-5p	0	0	0	0	0	0	#N/A	#N/A	#N/A	#N/A
hsa-miR-510-5p	0	0	0	0	0	0	#N/A	#N/A	#N/A	#N/A
hsa-miR-508-5p	0	0	0	0	0	0	#N/A	#N/A	#N/A	#N/A
hsa-miR-514a-5p	0	0	0	0	0	0	#N/A	#N/A	#N/A	#N/A
hsa-miR-509-5p	0	0	0	0	0	0	#N/A	#N/A	#N/A	#N/A
hsa-miR-509-3-5p	0	0	0	0	0	0	#N/A	#N/A	#N/A	#N/A
hsa-miR-217-5p	0	0	0	0	0	0	#N/A	#N/A	#N/A	#N/A
hsa-miR-9898	0	0	0	0	0	0	#N/A	#N/A	#N/A	#N/A
hsa-miR-890	0	0	0	0	0	0	#N/A	#N/A	#N/A	#N/A
hsa-miR-5003-3p	0	0	0	0	0	0	#N/A	#N/A	#N/A	#N/A
hsa-miR-6502-3p	0	0	0	0	0	0	#N/A	#N/A	#N/A	#N/A
hsa-miR-6863	0	0	0	0	0	0	#N/A	#N/A	#N/A	#N/A
hsa-miR-6758-5p	0	0	0	0	0	0	#N/A	#N/A	#N/A	#N/A
hsa-miR-3125	0	0	0	0	0	0	#N/A	#N/A	#N/A	#N/A
hsa-miR-12127	0	0	0	0	0	0	#N/A	#N/A	#N/A	#N/A
hsa-miR-5007-5p	0	0	0	0	0	0	#N/A	#N/A	#N/A	#N/A
hsa-miR-577	0	0	0	0	0	0	#N/A	#N/A	#N/A	#N/A
hsa-miR-7161-3p	0	0	0	0	0	0	#N/A	#N/A	#N/A	#N/A
hsa-miR-548p	0	0	0	0	0	0	#N/A	#N/A	#N/A	#N/A
hsa-miR-451b	0	0	0	0	0	0	#N/A	#N/A	#N/A	#N/A
hsa-miR-4703-5p	0	0	0	0	0	0	#N/A	#N/A	#N/A	#N/A
hsa-miR-3943	0	0	0	0	0	0	#N/A	#N/A	#N/A	#N/A
hsa-miR-3614-3p	0	0	0	0	0	0	#N/A	#N/A	#N/A	#N/A
hsa-miR-4781-5p	0	0	0	0	0	0	#N/A	#N/A	#N/A	#N/A
hsa-miR-4759	0	0	0	0	0	0	#N/A	#N/A	#N/A	#N/A
hsa-miR-3169	0	0	0	0	0	0	#N/A	#N/A	#N/A	#N/A
hsa-miR-3139	0	0	0	0	0	0	#N/A	#N/A	#N/A	#N/A
hsa-miR-4779	0	0	0	0	0	0	#N/A	#N/A	#N/A	#N/A
hsa-miR-2392	0	0	0	0	0	0	#N/A	#N/A	#N/A	#N/A
hsa-miR-3159	0	0	0	0	0	0	#N/A	#N/A	#N/A	#N/A
hsa-miR-5582-5p	0	0	0	0	0	0	#N/A	#N/A	#N/A	#N/A
hsa-miR-449c-5p	0	0	0	0	0	0	#N/A	#N/A	#N/A	#N/A
hsa-miR-34b-5p	0	0	0	0	0	0	#N/A	#N/A	#N/A	#N/A
hsa-miR-4717-5p	0	0	0	0	0	0	#N/A	#N/A	#N/A	#N/A
hsa-miR-1245b-5p	0	0	0	0	0	0	#N/A	#N/A	#N/A	#N/A
hsa-miR-6757-5p	0	0	0	0	0	0	#N/A	#N/A	#N/A	#N/A
hsa-miR-6783-5p	0	0	0	0	0	0	#N/A	#N/A	#N/A	#N/A
hsa-miR-4688	0	0	0	0	0	0	#N/A	#N/A	#N/A	#N/A
hsa-miR-6805-5p	0	0	0	0	0	0	#N/A	#N/A	#N/A	#N/A
hsa-miR-6732-5p	0	0	0	0	0	0	#N/A	#N/A	#N/A	#N/A
hsa-miR-6782-5p	0	0	0	0	0	0	#N/A	#N/A	#N/A	#N/A
hsa-miR-6841-5p	0	0	0	0	0	0	#N/A	#N/A	#N/A	#N/A
hsa-miR-6755-5p	0	0	0	0	0	0	#N/A	#N/A	#N/A	#N/A
hsa-miR-6831-5p	0	0	0	0	0	0	#N/A	#N/A	#N/A	#N/A
hsa-miR-6865-5p	0	0	0	0	0	0	#N/A	#N/A	#N/A	#N/A
hsa-miR-6815-5p	0	0	0	0	0	0	#N/A	#N/A	#N/A	#N/A
hsa-miR-624-5p	0	0	0	0	0	0	#N/A	#N/A	#N/A	#N/A
hsa-miR-1278	0	0	0	0	0	0	#N/A	#N/A	#N/A	#N/A
hsa-miR-2114-5p	0	0	0	0	0	0	#N/A	#N/A	#N/A	#N/A
hsa-miR-3174	0	0	0	0	0	0	#N/A	#N/A	#N/A	#N/A
hsa-miR-454-3p	0	0	0	0	0	0	#N/A	#N/A	#N/A	#N/A
hsa-miR-12115	0	0	0	0	0	0	#N/A	#N/A	#N/A	#N/A
hsa-miR-3681-5p	0	0	0	0	0	0	#N/A	#N/A	#N/A	#N/A
hsa-miR-6718-5p	0	0	0	0	0	0	#N/A	#N/A	#N/A	#N/A
hsa-miR-203b-5p	0	0	0	0	0	0	#N/A	#N/A	#N/A	#N/A
hsa-miR-5584-3p	0	0	0	0	0	0	#N/A	#N/A	#N/A	#N/A
hsa-miR-3163	0	0	0	0	0	0	#N/A	#N/A	#N/A	#N/A
hsa-miR-300	0	0	0	0	0	0	#N/A	#N/A	#N/A	#N/A
hsa-miR-875-5p	0	0	0	0	0	0	#N/A	#N/A	#N/A	#N/A
hsa-miR-3976	0	0	0	0	0	0	#N/A	#N/A	#N/A	#N/A
hsa-miR-135a-3p	0	0	0	0	0	0	#N/A	#N/A	#N/A	#N/A
hsa-miR-5011-5p	0	0	0	0	0	0	#N/A	#N/A	#N/A	#N/A
hsa-miR-8076	0	0	0	0	0	0	#N/A	#N/A	#N/A	#N/A
hsa-miR-2681-3p	0	0	0	0	0	0	#N/A	#N/A	#N/A	#N/A
hsa-miR-5586-5p	0	0	0	0	0	0	#N/A	#N/A	#N/A	#N/A
hsa-miR-4686	0	0	0	0	0	0	#N/A	#N/A	#N/A	#N/A
hsa-miR-586	0	0	0	0	0	0	#N/A	#N/A	#N/A	#N/A
hsa-miR-3688-3p	0	0	0	0	0	0	#N/A	#N/A	#N/A	#N/A
hsa-miR-4802-5p	0	0	0	0	0	0	#N/A	#N/A	#N/A	#N/A
hsa-miR-6514-5p	0	0	0	0	0	0	#N/A	#N/A	#N/A	#N/A
hsa-miR-3675-5p	0	0	0	0	0	0	#N/A	#N/A	#N/A	#N/A
hsa-miR-5579-5p	0	0	0	0	0	0	#N/A	#N/A	#N/A	#N/A
hsa-miR-7852-3p	0	0	0	0	0	0	#N/A	#N/A	#N/A	#N/A
hsa-miR-6834-3p	0	0	0	0	0	0	#N/A	#N/A	#N/A	#N/A
hsa-miR-4501	0	0	0	0	0	0	#N/A	#N/A	#N/A	#N/A
hsa-miR-455-5p	0	0	0	0	0	0	#N/A	#N/A	#N/A	#N/A
hsa-miR-12132	0	0	0	0	0	0	#N/A	#N/A	#N/A	#N/A
hsa-miR-506-5p	0	0	0	0	0	0	#N/A	#N/A	#N/A	#N/A
hsa-miR-664a-3p	0	0	0	0	0	0	#N/A	#N/A	#N/A	#N/A
hsa-miR-1323	0	0	0	0	0	0	#N/A	#N/A	#N/A	#N/A
hsa-miR-8063	0	0	0	0	0	0	#N/A	#N/A	#N/A	#N/A
hsa-miR-4698	0	0	0	0	0	0	#N/A	#N/A	#N/A	#N/A
hsa-miR-7853-5p	0	0	0	0	0	0	#N/A	#N/A	#N/A	#N/A
[truncated: 633 more rows]

## Sheet: IsoMirs
Name	Brain-Evs-24hr#1	Brain-Evs-24hr#2	Brain-Evs-24hr#3	Lung-Evs-24hr#1	Lung-Evs-24hr#2	Lung-Evs-24hr#3	Fold change	Log fold change	P-value	FDR p-value
hsa-miR-12129	61.7764	145.755	38.2092	2364.8	2282.57	2732.31	17.3338	4.11552	4.83375e-13	1.01219e-09
hsa-miR-4713-5p	73.0512	128.864	43.2241	1179.84	901.481	318.322	11.0023	3.45973	6.17918e-11	6.4696e-08
hsa-miR-5571-5p	99.8288	40.5746	51.8212	498.267	1124.64	642.776	12.1291	3.6004	3.65464e-09	2.55094e-06
hsa-miR-4795-3p	46.7434	100.479	30.0897	608.728	754.789	911.451	13.7273	3.77898	7.51427e-09	3.93372e-06
hsa-miR-4707-3p	61.3066	77.4924	69.9706	449.022	2874.02	1180.71	11.0902	3.47121	1.69338e-08	7.09189e-06
hsa-miR-598-5p	768.329	839.53	511.764	38.9859	221.079	19.2745	-10.8746	-3.44289	3.78741e-08	1.32181e-05
hsa-miR-6763-3p	200.127	156.378	32.0002	2275.55	2956.73	1782.02	8.83926	3.14393	6.51215e-08	1.94806e-05
hsa-miR-4760-3p	97.4799	43.1867	103.642	797.502	877.033	738.564	7.79388	2.96234	8.41554e-08	1.95802e-05
hsa-miR-5188	196.839	64.4318	140.18	1699.65	2577.52	1279.71	7.76128	2.95629	7.53759e-08	1.95802e-05
hsa-miR-4312	180.631	109.882	117.732	965.757	2002.71	1270.95	6.88417	2.78328	1.02103e-07	2.13805e-05
hsa-miR-579-3p	1784.7	922.072	951.886	311.203	1014.36	8.17707	-9.57273	-3.25893	2.34574e-07	4.46544e-05
hsa-miR-6516-3p	757.759	48.5851	30.8061	177.831	242.927	0.876114	-38.8968	-5.28158	7.50792e-07	0.000120935
hsa-miR-3529-3p	7.28163	71.0492	274.39	66.3445	0.520185	3.7965	-76.2518	-6.2527	7.30404e-07	0.000120935
hsa-miR-4650-5p	286.333	288.202	191.523	5845.15	5457.79	2359.08	11.2554	3.49255	8.60527e-07	0.00012871
hsa-miR-891b	54.2599	27.1659	177.434	74.2101	2.08074	2.04427	-66.1243	-6.04711	1.13326e-06	0.000158203
hsa-miR-143-3p	312.875	23398.9	99.105	280.767	2.08074	113.895	-58.4213	-5.86842	1.35574e-06	0.000177432
hsa-miR-4772-5p	245.931	1915.02	217.792	110.46	4.68167	201.506	-19.3642	-4.27532	1.67438e-06	0.000190293
hsa-miR-202-5p	58.4879	12755.9	40.8361	3.41982	6.24222	3.7965	-59.278	-5.88942	1.54619e-06	0.000190293
hsa-miR-888-5p	150.096	17.0657	106.986	74.552	325.636	4.08853	-64.8973	-6.02009	1.72663e-06	0.000190293
hsa-miR-6716-5p	141.17	198.346	304.002	2064.2	2259.17	883.707	6.6131	2.72533	2.0302e-06	0.000212562
hsa-miR-892c-5p	43.22	4477.49	89.3139	0.341982	1.04037	75.6379	-34.6492	-5.11475	2.20315e-06	0.000219686
hsa-miR-5581-3p	124.727	126.426	120.598	880.261	949.859	1310.67	6.09694	2.60808	2.98846e-06	0.00027208
hsa-miR-4678	89.9634	18.8071	85.0154	2.05189	1.04037	44.3898	-66.6184	-6.05785	2.9739e-06	0.00027208
hsa-miR-7162-3p	128.251	141.228	66.6272	1118.96	1991.79	557.793	6.27441	2.64948	4.43475e-06	0.000380487
hsa-miR-106a-3p	61.3066	117.719	169.314	74.2101	8.84315	5.84076	-31.3332	-4.96962	4.54259e-06	0.000380487
hsa-miR-595	789.47	1993.73	932.543	30908	32706.1	25014.8	13.3359	3.73724	5.55265e-06	0.000430639
hsa-miR-4468	166.773	42.6643	45.3734	2.05189	0.520185	0.584076	-65.9018	-6.04225	5.39461e-06	0.000430639
hsa-miR-7703	24.8985	71.2233	149.732	19.493	4.68167	1.46019	-55.6399	-5.79805	6.63139e-06	0.000495933
hsa-miR-6715b-3p	78.9235	87.9408	356.301	49.2454	11.9643	76.2219	-20.4942	-4.35714	7.50589e-06	0.000541977
hsa-miR-4704-3p	63.6555	38.485	82.8661	35.2241	3.12111	8.76114	-52.2811	-5.70822	9.39355e-06	0.00065567
hsa-miR-6850-3p	313.345	427.688	194.389	6336.58	8894.65	5532.95	8.53919	3.0941	1.21583e-05	0.000771498
hsa-miR-215-3p	310.996	387.984	488.839	21.8868	892.118	3.50446	-7.04966	-2.81755	1.15527e-05	0.000771498
hsa-miR-3145-3p	88.3191	89.8563	19.5822	0.341982	293.385	59.8678	-53.9325	-5.75308	1.18878e-05	0.000771498
hsa-miR-1203	245.461	185.982	134.687	1051.25	1448.72	1573.79	4.55095	2.18617	1.41686e-05	0.000872617
hsa-miR-12128	120.264	153.766	92.4184	13.6793	1.56056	66.0006	-25.7997	-4.68928	1.52692e-05	0.000913537
hsa-miR-635	351.632	654.593	215.165	10612.4	26203.8	11584.9	10.0121	3.32367	1.65509e-05	0.00096271
hsa-miR-15a-5p	533.673	11629.8	563.108	136.451	20.8074	17.8143	-17.2304	-4.10688	1.91871e-05	0.00108478
hsa-miR-6818-5p	138.116	207.923	216.598	49.9293	3.6413	120.32	-18.7069	-4.2255	1.96855e-05	0.00108478
hsa-miR-6866-5p	31.0057	9877.05	136.837	98.8327	864.548	441.562	-26.358	-4.72017	2.0957e-05	0.00112523
hsa-miR-5189-3p	136.472	157.771	75.4631	524.942	1914.8	418.491	5.43327	2.44182	2.15898e-05	0.00113022
hsa-miR-7159-5p	156.673	318.502	412.659	4006.66	4165.12	3316.97	8.21196	3.03773	2.26775e-05	0.00114193
hsa-miR-615-3p	168.182	280.54	305.196	732.867	1496.57	1308.62	4.31965	2.11091	2.29041e-05	0.00114193
hsa-miR-4642	92.3123	226.905	190.568	833.41	2246.68	1418.72	4.73916	2.24463	2.37869e-05	0.00115836
hsa-miR-1225-3p	317.103	507.618	176.001	2431.15	2214.95	3334.2	6.30352	2.65616	2.5422e-05	0.00120442
hsa-miR-4495	42.0455	77.4924	60.4183	44.4576	3.12111	42.3455	-42.6809	-5.41552	2.58829e-05	0.00120442
hsa-miR-3177-3p	176.873	560.209	57.075	1269.44	1435.19	1860.57	7.99667	2.9994	3.26003e-05	0.00146193
hsa-miR-12121	100.768	332.433	115.344	971.912	1291.62	1551.89	4.97465	2.31459	3.35112e-05	0.00146193
hsa-miR-614	185.799	211.58	311.644	1612.1	776.637	568.89	4.70371	2.2338	3.34722e-05	0.00146193
hsa-miR-3184-5p	256.032	373.531	162.867	3333.3	4960.49	2054.78	6.07158	2.60207	3.50255e-05	0.00146687
hsa-miR-4716-5p	362.672	62.3422	129.195	59.8468	2.60093	101.629	-25.4512	-4.66966	3.45169e-05	0.00146687
hsa-miR-513b-5p	59.6624	192.599	3.3433	51.9812	0	17.2302	-56.7706	-5.82707	3.69637e-05	0.00151768
hsa-miR-4727-5p	144.928	252.155	392.36	1230.45	2249.28	1364.99	4.2132	2.07492	4.79182e-05	0.00192963
hsa-miR-3186-5p	44.6293	107.967	111.762	375.154	630.985	541.439	6.73062	2.75074	4.90976e-05	0.00193982
hsa-miR-4679	324.855	190.858	257.196	1298.16	2657.11	719.29	3.92426	1.97242	5.30947e-05	0.00205889
hsa-miR-3917	117.211	258.946	112.239	605.65	1938.73	594.882	5.38508	2.42897	6.22431e-05	0.00236976
hsa-miR-4709-5p	68.1185	38.8332	85.493	1.02595	3.12111	40.3013	-30.4634	-4.929	6.59128e-05	0.00246467
hsa-miR-1469	182.511	163.343	195.106	2370.28	2973.9	1509.84	4.27911	2.09731	7.07588e-05	0.00259945
hsa-miR-4693-5p	54.7297	55.3766	53.254	64.6346	3.12111	3.21242	-38.8648	-5.28039	7.66317e-05	0.00276667
hsa-miR-4742-3p	38.7571	0.69656	120.598	3.07784	3.12111	54.9032	-49.8439	-5.63935	7.80647e-05	0.00277064
hsa-miR-6784-3p	42.9851	61.2973	100.777	282.819	8.84315	414.402	5.58986	2.48281	8.10761e-05	0.00282956
hsa-miR-1295a	379.115	607.227	278.688	234.6	588.33	122.072	-6.94517	-2.79601	8.31083e-05	0.00285293
hsa-miR-499a-3p	47.6829	2.6121	275.584	33.8562	0.520185	61.036	-31.0597	-4.95697	8.84296e-05	0.00298664
hsa-miR-5004-5p	39.6966	77.4924	18.3882	42.4057	0.520185	47.6022	-38.5102	-5.26717	9.13581e-05	0.00303657
hsa-miR-3942-3p	687.527	740.792	704.482	132.347	300.147	196.542	-3.97256	-1.99007	9.4875e-05	0.00310419
hsa-miR-3064-5p	189.322	254.767	528.242	2597.69	2099.99	2798.6	5.54887	2.47219	9.87178e-05	0.00318023
hsa-miR-3940-3p	137.881	178.668	83.3438	1587.14	1456	1191.81	5.0931	2.34855	0.000109851	0.00348529
hsa-miR-1225-5p	95.6008	87.7666	13.612	364.895	726.699	201.214	6.71664	2.74774	0.000123911	0.00387268
hsa-miR-133a-3p	230.193	119.46	265.554	280.767	499.898	79.4344	3.98465	1.99445	0.000134499	0.00414178
hsa-miR-491-3p	55.4344	25.4245	154.508	63.2666	1.04037	47.6022	-30.768	-4.94336	0.000140977	0.00427834
hsa-miR-8086	242.173	263.996	326.927	66.3445	195.07	54.9032	-6.89082	-2.78468	0.00015479	0.00456521
hsa-miR-6771-3p	24.1938	59.5559	147.105	45.4836	4.16148	41.7615	-26.3012	-4.71706	0.000154522	0.00456521
hsa-miR-1468-3p	496.56	209.839	201.076	46.5095	1.04037	2.92038	-5.8334	-2.54434	0.000170922	0.00491657
hsa-miR-10392-5p	102.178	226.556	3312.02	160.389	22.368	358.039	-10.0349	-3.32696	0.000171399	0.00491657
hsa-miR-3164	24.6636	3.65694	5.01495	80.7077	2.08074	2.3363	21.3802	4.4182	0.000188965	0.00527591
hsa-miR-410-3p	20.2007	69.656	51.1048	1.70991	1.56056	1.16815	-34.3528	-5.10235	0.000187673	0.00527591
hsa-miR-892a	106.171	849.978	87.1647	53.6911	217.437	24.8232	-12.4388	-3.63677	0.000197763	0.0054489
hsa-miR-451b	179.457	93.5132	292.061	73.1841	2.60093	69.7971	-12.0808	-3.59464	0.000205507	0.00558873
hsa-miR-6749-5p	161.84	173.792	95.7617	944.896	1135.04	476.898	4.96226	2.311	0.000250268	0.00671507
hsa-miR-3147	199.893	240.313	181.732	1914.41	7274.27	4722.55	3.65706	1.87068	0.000257945	0.00671507
hsa-miR-450a-5p	244.287	392.512	243.822	12.3113	6.76241	108.346	-5.94227	-2.57101	0.000259752	0.00671507
hsa-miR-103a-3p	19.7309	1008.79	131.105	48.9034	6.24222	74.1777	-11.0121	-3.46102	0.000259658	0.00671507
hsa-miR-936	96.0705	104.832	18.8658	567.348	1691.12	802.521	5.2918	2.40376	0.000266293	0.00679543
hsa-miR-3127-5p	216.1	491.946	107.702	2294.01	8120.09	4137.6	5.04757	2.33559	0.000269351	0.00679543
hsa-miR-718	138.116	102.046	74.7467	533.492	1017.48	424.039	4.67077	2.22366	0.000279799	0.00697499
hsa-miR-4428	519.345	610.013	212.061	385.413	226.801	366.8	-5.28245	-2.40121	0.000292482	0.00720538
hsa-miR-6514-5p	87.3796	317.632	26.03	97.1228	249.689	4.67261	-17.3038	-4.11302	0.000305508	0.00743877
hsa-miR-3181	244.052	564.911	142.329	1244.13	1025.81	832.017	5.72917	2.51833	0.000335905	0.00808489
hsa-miR-1199-5p	226.67	212.973	196.061	1322.79	1410.22	1257.52	4.00008	2.00003	0.000348725	0.00829806
hsa-miR-4783-3p	1028.82	845.624	803.348	379.942	466.606	654.165	-3.48398	-1.80074	0.000370198	0.00871006
hsa-miR-335-5p	47.9178	46.6696	27.4628	30.0944	2.60093	1.75223	-26.8648	-4.74764	0.000414179	0.00963655
hsa-miR-644a	465.32	789.9	831.288	8160.71	12254.5	5891.58	6.97384	2.80195	0.000425229	0.00978495
hsa-miR-301a-5p	329.083	511.101	435.823	1115.2	17520.9	1406.75	4.91458	2.29707	0.000443776	0.0101007
hsa-miR-217-3p	194.96	336.439	203.225	861.794	142.531	658.546	3.50449	1.8092	0.000489287	0.0110169
hsa-miR-11401	124.727	66.5215	65.1944	2.05189	12.4844	73.8856	4.94034	2.30461	0.000511394	0.0111548
hsa-miR-6812-3p	165.833	173.444	243.822	334.116	359.448	1398.57	3.69843	1.88691	0.000506803	0.0111548
hsa-miR-148a-3p	12.919	493.339	26.03	0.683964	2.08074	55.1952	-19.9663	-4.31949	0.000504813	0.0111548
hsa-miR-182-5p	74.4605	279.495	389.017	114.564	4.68167	165.586	-9.20449	-3.20234	0.000532783	0.0115015
hsa-miR-3122	1166.71	883.935	344.838	224.34	300.667	168.214	-3.781	-1.91877	0.000549869	0.0117492
hsa-miR-3909	16.2075	17.2399	84.0602	0.341982	2.60093	1.75223	-24.4358	-4.61092	0.000564026	0.01193
hsa-miR-6715a-3p	39.2268	56.7697	42.7465	190.142	267.375	66.0006	6.1912	2.63022	0.000583169	0.0120906
hsa-miR-4445-3p	48.6225	117.893	1523.83	19.8349	332.398	1.16815	-10.4171	-3.38088	0.000578497	0.0120906
hsa-miR-6895-3p	63.8904	31.8676	71.881	57.4529	6.76241	134.338	-19.6223	-4.29442	0.000626553	0.0128377
hsa-miR-3166	42.5153	55.0283	52.7764	0.683964	1.04037	2.04427	-22.4572	-4.4891	0.000631462	0.0128377
hsa-miR-30a-5p	713.13	2712.75	778.99	31.1203	8.84315	44.0978	-5.84926	-2.54825	0.000686191	0.0138162
hsa-miR-7848-3p	89.4936	288.55	151.165	110.46	22.8882	136.966	-11.6735	-3.54516	0.000743863	0.0148348
hsa-miR-5579-3p	190.262	594.514	506.749	135.767	0.520185	1.46019	-5.48417	-2.45527	0.000757747	0.0149691
hsa-miR-6738-3p	411.295	418.981	490.271	2117.21	4889.74	1918.69	5.14398	2.36288	0.000778567	0.0152366
hsa-miR-3529-5p	308.412	2003.66	108.896	256.828	3.6413	55.7793	-6.97596	-2.80239	0.000801177	0.0154962
hsa-miR-1252-5p	204.121	149.935	74.9855	2.39387	194.029	3.50446	-12.3502	-3.62646	0.000806632	0.0154962
hsa-miR-22-5p	139.291	221.332	131.105	544.435	993.554	587.873	3.97493	1.99093	0.000830681	0.0157171
hsa-miR-4764-3p	99.5939	290.117	213.016	586.841	919.688	483.031	3.74523	1.90505	0.00083314	0.0157171
hsa-miR-9902	0.469783	1.39312	18.3882	120.378	229.922	2.3363	18.7348	4.22765	0.000858026	0.016042
hsa-miR-302c-5p	27.9521	0.52242	41.7913	27.7005	2.08074	52.8589	-35.5603	-5.1522	0.000878085	0.0162718
hsa-miR-5692b	0.704674	24.7279	43.7017	73.5261	4.16148	1.46019	-35.0409	-5.13097	0.000887934	0.0163099
hsa-miR-16-2-3p	26.5427	39.5298	1.67165	290.001	743.345	373.517	10.7599	3.42759	0.000912092	0.0164648
hsa-miR-1228-5p	233.482	149.761	510.57	210.319	10.4037	100.169	-6.53927	-2.70913	0.000908374	0.0164648
hsa-miR-6724-5p	71.1721	91.7718	65.1944	675.756	1982.43	559.545	4.71727	2.23795	0.000927845	0.0166061
hsa-miR-3180	170.531	284.023	208.24	1057.07	897.32	667.015	3.20146	1.67873	0.00102693	0.0182237
hsa-miR-4520-2-3p	329.083	413.757	276.061	1150.43	919.688	936.858	3.40139	1.76612	0.00107624	0.0189382
hsa-miR-4789-5p	0.234891	1.04484	86.6871	1.70991	5.20185	54.3191	-35.8486	-5.16385	0.00116561	0.0203399
hsa-miR-7151-3p	44.1596	47.8885	9.7911	38.302	3.12111	4.08853	-20.862	-4.38281	0.00119706	0.0207161
hsa-miR-381-5p	365.961	573.095	313.076	349.505	419.79	236.551	-3.83294	-1.93845	0.00126374	0.0215921
hsa-let-7e-3p	379.115	369.177	171.702	36.2501	2.60093	2.3363	-7.28986	-2.86589	0.0012683	0.0215921
hsa-miR-6765-5p	146.572	220.113	126.329	1543.71	2095.31	923.425	3.25581	1.70302	0.00130433	0.0218502
hsa-miR-499a-5p	1.17446	47.8885	58.7466	75.92	0.520185	0.876114	-24.0902	-4.59037	0.00130228	0.0218502
hsa-miR-1537-5p	36.1733	30.1262	30.3285	48.2194	2.60093	0.876114	-21.2301	-4.40804	0.0013247	0.0220152
hsa-miR-3136-5p	223.147	247.976	56.8361	1243.1	1680.72	2427.13	3.98747	1.99547	0.00139313	0.0229701
hsa-miR-4300	270.595	195.559	252.658	928.481	1987.63	1274.45	3.13334	1.6477	0.00150281	0.0245851
hsa-miR-6728-3p	117.915	55.899	30.8061	914.117	692.887	337.012	5.03331	2.33151	0.00155382	0.0251497
hsa-miR-1-3p	207.409	322.159	1043.35	307.1	154.495	425.207	-4.50126	-2.17033	0.00156642	0.0251497
hsa-miR-518a-5p	299.252	334.523	140.896	119.694	411.467	5.25669	-6.84833	-2.77575	0.00157336	0.0251497
hsa-miR-6837-3p	176.873	59.5559	212.777	119.352	11.4441	166.754	4.83984	2.27496	0.00159215	0.0252572
hsa-miR-3974	193.55	228.82	95.5229	637.454	530.589	280.357	3.46179	1.79152	0.00161788	0.0254725
hsa-miR-4705	30.0661	41.2712	28.4181	0	2.08074	1.75223	-17.4073	-4.12162	0.00165677	0.0258901
hsa-miR-144-5p	13.3888	4.17936	37.9704	0.341982	2.08074	2.04427	-23.8101	-4.5735	0.00168899	0.0261981
hsa-miR-4433a-3p	185.564	184.066	38.2092	106.698	3.6413	51.9828	-12.0733	-3.59375	0.00176003	0.0270993
hsa-miR-4640-5p	54.025	76.7958	147.344	195.614	357.367	686.874	4.3341	2.11573	0.0018947	0.0285432
hsa-miR-8066	255.797	231.432	290.151	697.985	1177.7	411.19	2.99447	1.5823	0.0018689	0.0285432
hsa-miR-483-5p	24.4287	44.4057	27.224	2.73585	4.16148	58.1156	-18.6453	-4.22074	0.00189223	0.0285432
hsa-miR-7855-5p	388.275	369.874	592.481	791.346	13.5248	102.505	5.23941	2.38941	0.00196783	0.0294331
hsa-miR-6071	118.62	167.523	75.2243	1032.79	2146.81	697.387	4.26332	2.09198	0.00198253	0.0294426
hsa-miR-4276	70.9372	216.804	86.9259	1023.21	1143.89	1392.15	3.82904	1.93698	0.00210021	0.030955
hsa-miR-515-5p	389.92	180.932	276.061	1060.14	1360.28	514.863	3.39565	1.76369	0.00211393	0.030955
hsa-miR-1266-5p	188.618	150.457	188.419	1201.04	1493.45	1122.59	3.61558	1.85423	0.00216292	0.0310217
hsa-miR-142-5p	89.2587	73.6613	152.837	21.8868	1.56056	39.1331	-13.5893	-3.7644	0.00214491	0.0310217
hsa-miR-2276-3p	57.0786	48.9334	60.8959	3.41982	1.04037	4.08853	-14.5761	-3.86554	0.00216241	0.0310217
hsa-miR-3195	414.818	812.886	224.479	4278.88	10923.9	5643.34	4.71981	2.23873	0.00229948	0.0327559
hsa-miR-4662a-3p	368.779	826.469	244.539	2803.91	3811.92	2006.01	4.15517	2.05491	0.00241169	0.0334721
hsa-miR-532-5p	487.869	573.792	393.316	167.913	367.251	237.719	-4.38776	-2.13349	0.0024137	0.0334721
hsa-miR-498-3p	272.239	148.367	205.613	28.0425	277.259	27.1595	-8.41708	-3.07332	0.00237545	0.0334721
hsa-miR-4803	17.8517	1.21898	76.896	1.70991	0	0.292038	-20.7107	-4.37231	0.00239902	0.0334721
hsa-miR-6731-3p	19.496	3.65694	20.7762	28.7265	6.24222	1.46019	-18.8928	-4.23977	0.00249244	0.0343367
hsa-miR-544b	11.7446	51.7196	46.8062	572.82	113.921	275.392	5.99149	2.58292	0.00258778	0.0352727
hsa-miR-885-5p	0.469783	54.1576	2.14927	0.341982	0	0.876114	-29.2736	-4.87153	0.00259407	0.0352727
hsa-miR-329-3p	918.66	1260.95	731.944	8114.89	8602.83	6332.85	5.23231	2.38745	0.00263414	0.0355489
hsa-miR-4757-5p	117.446	112.669	22.6867	722.608	1179.26	723.086	4.14799	2.05241	0.00264834	0.0355489
hsa-miR-4690-5p	94.1914	101.698	148.299	382.336	183.105	647.741	3.80265	1.927	0.00266551	0.0355515
hsa-miR-3650	137.411	126.426	92.1796	3.41982	340.721	61.036	4.34569	2.11958	0.00273872	0.0362832
hsa-miR-3129-3p	16.6773	5.57248	62.3287	8.20756	0	0.584076	-21.0899	-4.39848	0.00275502	0.0362832
hsa-miR-4764-5p	536.727	697.257	590.332	274.953	1802.44	550.492	-2.8864	-1.52927	0.00283956	0.0369457
hsa-miR-3617-3p	45.5689	43.7092	45.1346	19.493	1.56056	99.877	-14.4927	-3.85725	0.00284062	0.0369457
hsa-miR-29a-3p	196.134	1291.42	80.9557	4.10378	2.60093	5.25669	-5.27105	-2.39809	0.00293355	0.0379189
hsa-miR-5010-3p	122.143	209.665	370.629	50.2713	5.72204	140.47	-7.32299	-2.87243	0.00295398	0.0379487
hsa-miR-497-3p	377.94	152.547	331.703	0	2.08074	1.16815	-3.86823	-1.95167	0.00319128	0.0405002
hsa-miR-3188	92.0774	28.7331	1.91046	1.02595	3.6413	57.2395	-17.718	-4.14715	0.00318658	0.0405002
hsa-miR-1237-5p	97.245	113.017	93.8513	142.264	224.2	238.887	3.38458	1.75898	0.00324355	0.0409156
hsa-miR-193a-5p	172.88	273.574	417.196	1703.41	919.688	1531.16	3.2002	1.67816	0.00336832	0.0420547
hsa-miR-4426	276.937	381.541	199.882	1379.9	5349.07	3441.09	2.99068	1.58047	0.00337401	0.0420547
hsa-miR-6815-5p	384.047	741.314	304.479	306.416	9.88352	178.143	-3.43965	-1.78226	0.00341116	0.0422661
hsa-miR-1307-5p	462.501	631.084	444.659	2067.62	2955.17	2067.92	3.5393	1.82346	0.00347773	0.0428374
hsa-miR-5696	97.9497	110.753	99.8215	223.314	349.044	419.951	3.97646	1.99148	0.00359512	0.0440245
hsa-miR-1278	133.653	172.05	1817.32	163.467	596.653	182.816	-4.49207	-2.16738	0.00367506	0.0447417
hsa-miR-6798-5p	38.7571	2.43796	2.62688	272.901	451.521	122.072	10.3542	3.37214	0.00371827	0.0450062
hsa-miR-767-5p	134.593	136.874	141.135	424.741	963.383	263.126	3.34198	1.7407	0.00374488	0.0450677
hsa-miR-6894-3p	76.3397	94.5581	124.657	490.06	699.649	514.863	4.18523	2.06531	0.00386815	0.0462852
hsa-miR-488-3p	408.476	330.17	390.211	2087.8	2674.27	1181.29	2.8886	1.53037	0.00398157	0.0473716
hsa-miR-624-5p	15.5028	4.52764	54.6869	1.02595	4.16148	1.75223	-17.8675	-4.15927	0.00401986	0.0475569
hsa-miR-3938	115.801	106.4	22.4479	404.222	967.025	598.97	4.20481	2.07204	0.00409773	0.0482058
hsa-miR-205-3p	2.34891	1.91554	1.43284	0.683964	1.04037	66.8767	17.8348	4.15663	0.00417774	0.0488725
hsa-miR-4658	528.036	107.619	614.451	74.2101	579.487	20.7347	-5.58835	-2.48242	0.00422752	0.0491802

## Sheet: TNF-lung-mature
Name	Chromosome	Region	Identifier	EVs-Lung-TNFvsctlr-mature - Max group means	EVs-Lung-TNFvsctlr-mature - Fold change	EVs-Lung-TNFvsctlr-mature - Log fold change	EVs-Lung-TNFvsctlr-mature - P-value	EVs-Lung-TNFvsctlr-mature - FDR p-value	EVs-Lung-TNFvsctlr-mature - Bonferroni	49003001_1 (grouped on mature) - Total counts	49003001_1 (grouped on mature) - RPKM	49003001_1 (grouped on mature) - TPM	49003001_1 (grouped on mature) - CPM	49003005_1 (grouped on mature) - Total counts	49003005_1 (grouped on mature) - RPKM	49003005_1 (grouped on mature) - TPM	49003005_1 (grouped on mature) - CPM	49003003_1 (grouped on mature) - Total counts	49003003_1 (grouped on mature) - RPKM	49003003_1 (grouped on mature) - TPM	49003003_1 (grouped on mature) - CPM	49003002_1 (grouped on mature) - Total counts	49003002_1 (grouped on mature) - RPKM	49003002_1 (grouped on mature) - TPM	49003002_1 (grouped on mature) - CPM	49003004_1 (grouped on mature) - Total counts	49003004_1 (grouped on mature) - RPKM	49003004_1 (grouped on mature) - TPM	49003004_1 (grouped on mature) - CPM	49003006_1 (grouped on mature) - Total counts	49003006_1 (grouped on mature) - RPKM	49003006_1 (grouped on mature) - TPM	49003006_1 (grouped on mature) - CPM
hsa-miR-548ap-3p				0	#N/A	#N/A	#N/A	#N/A	#N/A	0	#N/A	#N/A	0	0	#N/A	#N/A	0	0	#N/A	#N/A	0	0	#N/A	#N/A	0	0	#N/A	#N/A	0	0	#N/A	#N/A	0
hsa-miR-548t-3p				0	#N/A	#N/A	#N/A	#N/A	#N/A	0	#N/A	#N/A	0	0	#N/A	#N/A	0	0	#N/A	#N/A	0	0	#N/A	#N/A	0	0	#N/A	#N/A	0	0	#N/A	#N/A	0
hsa-miR-548e-3p				0	#N/A	#N/A	#N/A	#N/A	#N/A	0	#N/A	#N/A	0	0	#N/A	#N/A	0	0	#N/A	#N/A	0	0	#N/A	#N/A	0	0	#N/A	#N/A	0	0	#N/A	#N/A	0
hsa-miR-548az-3p				0	#N/A	#N/A	#N/A	#N/A	#N/A	0	#N/A	#N/A	0	0	#N/A	#N/A	0	0	#N/A	#N/A	0	0	#N/A	#N/A	0	0	#N/A	#N/A	0	0	#N/A	#N/A	0
hsa-miR-548f-3p				0	#N/A	#N/A	#N/A	#N/A	#N/A	0	#N/A	#N/A	0	0	#N/A	#N/A	0	0	#N/A	#N/A	0	0	#N/A	#N/A	0	0	#N/A	#N/A	0	0	#N/A	#N/A	0
hsa-miR-548bc				0	#N/A	#N/A	#N/A	#N/A	#N/A	0	#N/A	#N/A	0	0	#N/A	#N/A	0	0	#N/A	#N/A	0	0	#N/A	#N/A	0	0	#N/A	#N/A	0	0	#N/A	#N/A	0
hsa-miR-1537-3p				0	#N/A	#N/A	#N/A	#N/A	#N/A	0	#N/A	#N/A	0	0	#N/A	#N/A	0	0	#N/A	#N/A	0	0	#N/A	#N/A	0	0	#N/A	#N/A	0	0	#N/A	#N/A	0
hsa-miR-553				0	#N/A	#N/A	#N/A	#N/A	#N/A	0	#N/A	#N/A	0	0	#N/A	#N/A	0	0	#N/A	#N/A	0	0	#N/A	#N/A	0	0	#N/A	#N/A	0	0	#N/A	#N/A	0
hsa-miR-7844-5p				0	#N/A	#N/A	#N/A	#N/A	#N/A	0	#N/A	#N/A	0	0	#N/A	#N/A	0	0	#N/A	#N/A	0	0	#N/A	#N/A	0	0	#N/A	#N/A	0	0	#N/A	#N/A	0
hsa-miR-548av-3p				0	#N/A	#N/A	#N/A	#N/A	#N/A	0	#N/A	#N/A	0	0	#N/A	#N/A	0	0	#N/A	#N/A	0	0	#N/A	#N/A	0	0	#N/A	#N/A	0	0	#N/A	#N/A	0
hsa-miR-548g-3p				0	#N/A	#N/A	#N/A	#N/A	#N/A	0	#N/A	#N/A	0	0	#N/A	#N/A	0	0	#N/A	#N/A	0	0	#N/A	#N/A	0	0	#N/A	#N/A	0	0	#N/A	#N/A	0
hsa-miR-6835-3p				0	#N/A	#N/A	#N/A	#N/A	#N/A	0	#N/A	#N/A	0	0	#N/A	#N/A	0	0	#N/A	#N/A	0	0	#N/A	#N/A	0	0	#N/A	#N/A	0	0	#N/A	#N/A	0
hsa-miR-4422				0	#N/A	#N/A	#N/A	#N/A	#N/A	0	#N/A	#N/A	0	0	#N/A	#N/A	0	0	#N/A	#N/A	0	0	#N/A	#N/A	0	0	#N/A	#N/A	0	0	#N/A	#N/A	0
hsa-miR-4429				0	#N/A	#N/A	#N/A	#N/A	#N/A	0	#N/A	#N/A	0	0	#N/A	#N/A	0	0	#N/A	#N/A	0	0	#N/A	#N/A	0	0	#N/A	#N/A	0	0	#N/A	#N/A	0
hsa-miR-320d				0	#N/A	#N/A	#N/A	#N/A	#N/A	0	#N/A	#N/A	0	0	#N/A	#N/A	0	0	#N/A	#N/A	0	0	#N/A	#N/A	0	0	#N/A	#N/A	0	0	#N/A	#N/A	0
hsa-miR-320b				0	#N/A	#N/A	#N/A	#N/A	#N/A	0	#N/A	#N/A	0	0	#N/A	#N/A	0	0	#N/A	#N/A	0	0	#N/A	#N/A	0	0	#N/A	#N/A	0	0	#N/A	#N/A	0
hsa-miR-320a-3p				1	1.23167	0.300621	0.867513	0.96669	1	1	#N/A	#N/A	27.9497	0	#N/A	#N/A	0	1	#N/A	#N/A	35.6651	3	#N/A	#N/A	125.339	0	#N/A	#N/A	0	0	#N/A	#N/A	0
hsa-miR-320c				0	#N/A	#N/A	#N/A	#N/A	#N/A	0	#N/A	#N/A	0	0	#N/A	#N/A	0	0	#N/A	#N/A	0	0	#N/A	#N/A	0	0	#N/A	#N/A	0	0	#N/A	#N/A	0
hsa-miR-548an				0	#N/A	#N/A	#N/A	#N/A	#N/A	0	#N/A	#N/A	0	0	#N/A	#N/A	0	0	#N/A	#N/A	0	0	#N/A	#N/A	0	0	#N/A	#N/A	0	0	#N/A	#N/A	0
hsa-miR-4484				0	#N/A	#N/A	#N/A	#N/A	#N/A	0	#N/A	#N/A	0	0	#N/A	#N/A	0	0	#N/A	#N/A	0	0	#N/A	#N/A	0	0	#N/A	#N/A	0	0	#N/A	#N/A	0
hsa-miR-10526-3p				0	#N/A	#N/A	#N/A	#N/A	#N/A	0	#N/A	#N/A	0	0	#N/A	#N/A	0	0	#N/A	#N/A	0	0	#N/A	#N/A	0	0	#N/A	#N/A	0	0	#N/A	#N/A	0
hsa-miR-548bb-5p				0	#N/A	#N/A	#N/A	#N/A	#N/A	0	#N/A	#N/A	0	0	#N/A	#N/A	0	0	#N/A	#N/A	0	0	#N/A	#N/A	0	0	#N/A	#N/A	0	0	#N/A	#N/A	0
hsa-miR-548ak				0	#N/A	#N/A	#N/A	#N/A	#N/A	0	#N/A	#N/A	0	0	#N/A	#N/A	0	0	#N/A	#N/A	0	0	#N/A	#N/A	0	0	#N/A	#N/A	0	0	#N/A	#N/A	0
hsa-miR-548w				0	#N/A	#N/A	#N/A	#N/A	#N/A	0	#N/A	#N/A	0	0	#N/A	#N/A	0	0	#N/A	#N/A	0	0	#N/A	#N/A	0	0	#N/A	#N/A	0	0	#N/A	#N/A	0
hsa-miR-548y				0	#N/A	#N/A	#N/A	#N/A	#N/A	0	#N/A	#N/A	0	0	#N/A	#N/A	0	0	#N/A	#N/A	0	0	#N/A	#N/A	0	0	#N/A	#N/A	0	0	#N/A	#N/A	0
hsa-miR-548h-5p				0	#N/A	#N/A	#N/A	#N/A	#N/A	0	#N/A	#N/A	0	0	#N/A	#N/A	0	0	#N/A	#N/A	0	0	#N/A	#N/A	0	0	#N/A	#N/A	0	0	#N/A	#N/A	0
hsa-miR-548ar-5p				0	#N/A	#N/A	#N/A	#N/A	#N/A	0	#N/A	#N/A	0	0	#N/A	#N/A	0	0	#N/A	#N/A	0	0	#N/A	#N/A	0	0	#N/A	#N/A	0	0	#N/A	#N/A	0
hsa-miR-548a-5p				0	#N/A	#N/A	#N/A	#N/A	#N/A	0	#N/A	#N/A	0	0	#N/A	#N/A	0	0	#N/A	#N/A	0	0	#N/A	#N/A	0	0	#N/A	#N/A	0	0	#N/A	#N/A	0
hsa-miR-548i				0	#N/A	#N/A	#N/A	#N/A	#N/A	0	#N/A	#N/A	0	0	#N/A	#N/A	0	0	#N/A	#N/A	0	0	#N/A	#N/A	0	0	#N/A	#N/A	0	0	#N/A	#N/A	0
hsa-miR-548as-5p				0	#N/A	#N/A	#N/A	#N/A	#N/A	0	#N/A	#N/A	0	0	#N/A	#N/A	0	0	#N/A	#N/A	0	0	#N/A	#N/A	0	0	#N/A	#N/A	0	0	#N/A	#N/A	0
hsa-miR-548ap-5p				0	#N/A	#N/A	#N/A	#N/A	#N/A	0	#N/A	#N/A	0	0	#N/A	#N/A	0	0	#N/A	#N/A	0	0	#N/A	#N/A	0	0	#N/A	#N/A	0	0	#N/A	#N/A	0
hsa-miR-548j-5p				0	#N/A	#N/A	#N/A	#N/A	#N/A	0	#N/A	#N/A	0	0	#N/A	#N/A	0	0	#N/A	#N/A	0	0	#N/A	#N/A	0	0	#N/A	#N/A	0	0	#N/A	#N/A	0
hsa-miR-548au-5p				0	#N/A	#N/A	#N/A	#N/A	#N/A	0	#N/A	#N/A	0	0	#N/A	#N/A	0	0	#N/A	#N/A	0	0	#N/A	#N/A	0	0	#N/A	#N/A	0	0	#N/A	#N/A	0
hsa-miR-548c-5p				0	#N/A	#N/A	#N/A	#N/A	#N/A	0	#N/A	#N/A	0	0	#N/A	#N/A	0	0	#N/A	#N/A	0	0	#N/A	#N/A	0	0	#N/A	#N/A	0	0	#N/A	#N/A	0
hsa-miR-548ab				0	#N/A	#N/A	#N/A	#N/A	#N/A	0	#N/A	#N/A	0	0	#N/A	#N/A	0	0	#N/A	#N/A	0	0	#N/A	#N/A	0	0	#N/A	#N/A	0	0	#N/A	#N/A	0
hsa-miR-548b-5p				0	#N/A	#N/A	#N/A	#N/A	#N/A	0	#N/A	#N/A	0	0	#N/A	#N/A	0	0	#N/A	#N/A	0	0	#N/A	#N/A	0	0	#N/A	#N/A	0	0	#N/A	#N/A	0
hsa-miR-548ad-5p				0	#N/A	#N/A	#N/A	#N/A	#N/A	0	#N/A	#N/A	0	0	#N/A	#N/A	0	0	#N/A	#N/A	0	0	#N/A	#N/A	0	0	#N/A	#N/A	0	0	#N/A	#N/A	0
hsa-miR-548ay-5p				0	#N/A	#N/A	#N/A	#N/A	#N/A	0	#N/A	#N/A	0	0	#N/A	#N/A	0	0	#N/A	#N/A	0	0	#N/A	#N/A	0	0	#N/A	#N/A	0	0	#N/A	#N/A	0
hsa-miR-548d-5p				0	#N/A	#N/A	#N/A	#N/A	#N/A	0	#N/A	#N/A	0	0	#N/A	#N/A	0	0	#N/A	#N/A	0	0	#N/A	#N/A	0	0	#N/A	#N/A	0	0	#N/A	#N/A	0
hsa-miR-548av-5p				0	#N/A	#N/A	#N/A	#N/A	#N/A	0	#N/A	#N/A	0	0	#N/A	#N/A	0	0	#N/A	#N/A	0	0	#N/A	#N/A	0	0	#N/A	#N/A	0	0	#N/A	#N/A	0
hsa-miR-548k				0	#N/A	#N/A	#N/A	#N/A	#N/A	0	#N/A	#N/A	0	0	#N/A	#N/A	0	0	#N/A	#N/A	0	0	#N/A	#N/A	0	0	#N/A	#N/A	0	0	#N/A	#N/A	0
hsa-miR-548l				69.6667	200.572	7.64798	0.0254685	0.343683	1	0	#N/A	#N/A	0	0	#N/A	#N/A	0	0	#N/A	#N/A	0	0	#N/A	#N/A	0	209	#N/A	#N/A	4056.65	0	#N/A	#N/A	0
hsa-miR-548ah-5p				0	#N/A	#N/A	#N/A	#N/A	#N/A	0	#N/A	#N/A	0	0	#N/A	#N/A	0	0	#N/A	#N/A	0	0	#N/A	#N/A	0	0	#N/A	#N/A	0	0	#N/A	#N/A	0
hsa-miR-106a-5p				0	#N/A	#N/A	#N/A	#N/A	#N/A	0	#N/A	#N/A	0	0	#N/A	#N/A	0	0	#N/A	#N/A	0	0	#N/A	#N/A	0	0	#N/A	#N/A	0	0	#N/A	#N/A	0
hsa-miR-548at-5p				0	#N/A	#N/A	#N/A	#N/A	#N/A	0	#N/A	#N/A	0	0	#N/A	#N/A	0	0	#N/A	#N/A	0	0	#N/A	#N/A	0	0	#N/A	#N/A	0	0	#N/A	#N/A	0
hsa-miR-3646				0	#N/A	#N/A	#N/A	#N/A	#N/A	0	#N/A	#N/A	0	0	#N/A	#N/A	0	0	#N/A	#N/A	0	0	#N/A	#N/A	0	0	#N/A	#N/A	0	0	#N/A	#N/A	0
hsa-miR-224-3p				0	#N/A	#N/A	#N/A	#N/A	#N/A	0	#N/A	#N/A	0	0	#N/A	#N/A	0	0	#N/A	#N/A	0	0	#N/A	#N/A	0	0	#N/A	#N/A	0	0	#N/A	#N/A	0
hsa-miR-522-3p				0	#N/A	#N/A	#N/A	#N/A	#N/A	0	#N/A	#N/A	0	0	#N/A	#N/A	0	0	#N/A	#N/A	0	0	#N/A	#N/A	0	0	#N/A	#N/A	0	0	#N/A	#N/A	0
hsa-miR-3606-3p				0	#N/A	#N/A	#N/A	#N/A	#N/A	0	#N/A	#N/A	0	0	#N/A	#N/A	0	0	#N/A	#N/A	0	0	#N/A	#N/A	0	0	#N/A	#N/A	0	0	#N/A	#N/A	0
hsa-miR-495-3p				0	#N/A	#N/A	#N/A	#N/A	#N/A	0	#N/A	#N/A	0	0	#N/A	#N/A	0	0	#N/A	#N/A	0	0	#N/A	#N/A	0	0	#N/A	#N/A	0	0	#N/A	#N/A	0
hsa-miR-122b-3p				0	#N/A	#N/A	#N/A	#N/A	#N/A	0	#N/A	#N/A	0	0	#N/A	#N/A	0	0	#N/A	#N/A	0	0	#N/A	#N/A	0	0	#N/A	#N/A	0	0	#N/A	#N/A	0
hsa-miR-543				0	#N/A	#N/A	#N/A	#N/A	#N/A	0	#N/A	#N/A	0	0	#N/A	#N/A	0	0	#N/A	#N/A	0	0	#N/A	#N/A	0	0	#N/A	#N/A	0	0	#N/A	#N/A	0
hsa-miR-451a				1198.33	-2.33988	-1.22644	0.25085	0.651646	1	404	#N/A	#N/A	11291.7	642	#N/A	#N/A	328115	1029	#N/A	#N/A	36699.4	1228	#N/A	#N/A	51305.4	1822	#N/A	#N/A	35364.7	545	#N/A	#N/A	73717.8
hsa-miR-649				0	#N/A	#N/A	#N/A	#N/A	#N/A	0	#N/A	#N/A	0	0	#N/A	#N/A	0	0	#N/A	#N/A	0	0	#N/A	#N/A	0	0	#N/A	#N/A	0	0	#N/A	#N/A	0
hsa-miR-5583-5p				0	#N/A	#N/A	#N/A	#N/A	#N/A	0	#N/A	#N/A	0	0	#N/A	#N/A	0	0	#N/A	#N/A	0	0	#N/A	#N/A	0	0	#N/A	#N/A	0	0	#N/A	#N/A	0
hsa-miR-3129-3p				0	#N/A	#N/A	#N/A	#N/A	#N/A	0	#N/A	#N/A	0	0	#N/A	#N/A	0	0	#N/A	#N/A	0	0	#N/A	#N/A	0	0	#N/A	#N/A	0	0	#N/A	#N/A	0
hsa-miR-606				0	#N/A	#N/A	#N/A	#N/A	#N/A	0	#N/A	#N/A	0	0	#N/A	#N/A	0	0	#N/A	#N/A	0	0	#N/A	#N/A	0	0	#N/A	#N/A	0	0	#N/A	#N/A	0
hsa-miR-618				0	#N/A	#N/A	#N/A	#N/A	#N/A	0	#N/A	#N/A	0	0	#N/A	#N/A	0	0	#N/A	#N/A	0	0	#N/A	#N/A	0	0	#N/A	#N/A	0	0	#N/A	#N/A	0
hsa-miR-641				0	#N/A	#N/A	#N/A	#N/A	#N/A	0	#N/A	#N/A	0	0	#N/A	#N/A	0	0	#N/A	#N/A	0	0	#N/A	#N/A	0	0	#N/A	#N/A	0	0	#N/A	#N/A	0
hsa-miR-3617-5p				0	#N/A	#N/A	#N/A	#N/A	#N/A	0	#N/A	#N/A	0	0	#N/A	#N/A	0	0	#N/A	#N/A	0	0	#N/A	#N/A	0	0	#N/A	#N/A	0	0	#N/A	#N/A	0
hsa-miR-3667-5p				0	#N/A	#N/A	#N/A	#N/A	#N/A	0	#N/A	#N/A	0	0	#N/A	#N/A	0	0	#N/A	#N/A	0	0	#N/A	#N/A	0	0	#N/A	#N/A	0	0	#N/A	#N/A	0
hsa-miR-548ao-3p				0	#N/A	#N/A	#N/A	#N/A	#N/A	0	#N/A	#N/A	0	0	#N/A	#N/A	0	0	#N/A	#N/A	0	0	#N/A	#N/A	0	0	#N/A	#N/A	0	0	#N/A	#N/A	0
hsa-miR-4432				0	#N/A	#N/A	#N/A	#N/A	#N/A	0	#N/A	#N/A	0	0	#N/A	#N/A	0	0	#N/A	#N/A	0	0	#N/A	#N/A	0	0	#N/A	#N/A	0	0	#N/A	#N/A	0
hsa-miR-4662a-3p				0	#N/A	#N/A	#N/A	#N/A	#N/A	0	#N/A	#N/A	0	0	#N/A	#N/A	0	0	#N/A	#N/A	0	0	#N/A	#N/A	0	0	#N/A	#N/A	0	0	#N/A	#N/A	0
hsa-miR-3156-5p				0	#N/A	#N/A	#N/A	#N/A	#N/A	0	#N/A	#N/A	0	0	#N/A	#N/A	0	0	#N/A	#N/A	0	0	#N/A	#N/A	0	0	#N/A	#N/A	0	0	#N/A	#N/A	0
hsa-miR-4662b				0	#N/A	#N/A	#N/A	#N/A	#N/A	0	#N/A	#N/A	0	0	#N/A	#N/A	0	0	#N/A	#N/A	0	0	#N/A	#N/A	0	0	#N/A	#N/A	0	0	#N/A	#N/A	0
hsa-miR-10527-5p				0	#N/A	#N/A	#N/A	#N/A	#N/A	0	#N/A	#N/A	0	0	#N/A	#N/A	0	0	#N/A	#N/A	0	0	#N/A	#N/A	0	0	#N/A	#N/A	0	0	#N/A	#N/A	0
hsa-miR-498-3p				0	#N/A	#N/A	#N/A	#N/A	#N/A	0	#N/A	#N/A	0	0	#N/A	#N/A	0	0	#N/A	#N/A	0	0	#N/A	#N/A	0	0	#N/A	#N/A	0	0	#N/A	#N/A	0
hsa-miR-518e-3p				0	#N/A	#N/A	#N/A	#N/A	#N/A	0	#N/A	#N/A	0	0	#N/A	#N/A	0	0	#N/A	#N/A	0	0	#N/A	#N/A	0	0	#N/A	#N/A	0	0	#N/A	#N/A	0
hsa-miR-320e				0	#N/A	#N/A	#N/A	#N/A	#N/A	0	#N/A	#N/A	0	0	#N/A	#N/A	0	0	#N/A	#N/A	0	0	#N/A	#N/A	0	0	#N/A	#N/A	0	0	#N/A	#N/A	0
hsa-miR-651-3p				0	#N/A	#N/A	#N/A	#N/A	#N/A	0	#N/A	#N/A	0	0	#N/A	#N/A	0	0	#N/A	#N/A	0	0	#N/A	#N/A	0	0	#N/A	#N/A	0	0	#N/A	#N/A	0
hsa-miR-3173-3p				0	#N/A	#N/A	#N/A	#N/A	#N/A	0	#N/A	#N/A	0	0	#N/A	#N/A	0	0	#N/A	#N/A	0	0	#N/A	#N/A	0	0	#N/A	#N/A	0	0	#N/A	#N/A	0
hsa-miR-541-5p				0	#N/A	#N/A	#N/A	#N/A	#N/A	0	#N/A	#N/A	0	0	#N/A	#N/A	0	0	#N/A	#N/A	0	0	#N/A	#N/A	0	0	#N/A	#N/A	0	0	#N/A	#N/A	0
hsa-miR-3910				0	#N/A	#N/A	#N/A	#N/A	#N/A	0	#N/A	#N/A	0	0	#N/A	#N/A	0	0	#N/A	#N/A	0	0	#N/A	#N/A	0	0	#N/A	#N/A	0	0	#N/A	#N/A	0
hsa-miR-548ba				0	#N/A	#N/A	#N/A	#N/A	#N/A	0	#N/A	#N/A	0	0	#N/A	#N/A	0	0	#N/A	#N/A	0	0	#N/A	#N/A	0	0	#N/A	#N/A	0	0	#N/A	#N/A	0
hsa-miR-570-5p				0	#N/A	#N/A	#N/A	#N/A	#N/A	0	#N/A	#N/A	0	0	#N/A	#N/A	0	0	#N/A	#N/A	0	0	#N/A	#N/A	0	0	#N/A	#N/A	0	0	#N/A	#N/A	0
hsa-miR-548ag				0	#N/A	#N/A	#N/A	#N/A	#N/A	0	#N/A	#N/A	0	0	#N/A	#N/A	0	0	#N/A	#N/A	0	0	#N/A	#N/A	0	0	#N/A	#N/A	0	0	#N/A	#N/A	0
hsa-miR-3974				0	#N/A	#N/A	#N/A	#N/A	#N/A	0	#N/A	#N/A	0	0	#N/A	#N/A	0	0	#N/A	#N/A	0	0	#N/A	#N/A	0	0	#N/A	#N/A	0	0	#N/A	#N/A	0
hsa-miR-4735-3p				0	#N/A	#N/A	#N/A	#N/A	#N/A	0	#N/A	#N/A	0	0	#N/A	#N/A	0	0	#N/A	#N/A	0	0	#N/A	#N/A	0	0	#N/A	#N/A	0	0	#N/A	#N/A	0
hsa-miR-562				0	#N/A	#N/A	#N/A	#N/A	#N/A	0	#N/A	#N/A	0	0	#N/A	#N/A	0	0	#N/A	#N/A	0	0	#N/A	#N/A	0	0	#N/A	#N/A	0	0	#N/A	#N/A	0
hsa-miR-3184-3p				0	#N/A	#N/A	#N/A	#N/A	#N/A	0	#N/A	#N/A	0	0	#N/A	#N/A	0	0	#N/A	#N/A	0	0	#N/A	#N/A	0	0	#N/A	#N/A	0	0	#N/A	#N/A	0
hsa-miR-519b-3p				0	#N/A	#N/A	#N/A	#N/A	#N/A	0	#N/A	#N/A	0	0	#N/A	#N/A	0	0	#N/A	#N/A	0	0	#N/A	#N/A	0	0	#N/A	#N/A	0	0	#N/A	#N/A	0
hsa-miR-519a-3p				0	#N/A	#N/A	#N/A	#N/A	#N/A	0	#N/A	#N/A	0	0	#N/A	#N/A	0	0	#N/A	#N/A	0	0	#N/A	#N/A	0	0	#N/A	#N/A	0	0	#N/A	#N/A	0
hsa-miR-519c-3p				0	#N/A	#N/A	#N/A	#N/A	#N/A	0	#N/A	#N/A	0	0	#N/A	#N/A	0	0	#N/A	#N/A	0	0	#N/A	#N/A	0	0	#N/A	#N/A	0	0	#N/A	#N/A	0
hsa-miR-372-3p				0	#N/A	#N/A	#N/A	#N/A	#N/A	0	#N/A	#N/A	0	0	#N/A	#N/A	0	0	#N/A	#N/A	0	0	#N/A	#N/A	0	0	#N/A	#N/A	0	0	#N/A	#N/A	0
hsa-miR-520a-3p				0	#N/A	#N/A	#N/A	#N/A	#N/A	0	#N/A	#N/A	0	0	#N/A	#N/A	0	0	#N/A	#N/A	0	0	#N/A	#N/A	0	0	#N/A	#N/A	0	0	#N/A	#N/A	0
hsa-miR-520b-3p				0	#N/A	#N/A	#N/A	#N/A	#N/A	0	#N/A	#N/A	0	0	#N/A	#N/A	0	0	#N/A	#N/A	0	0	#N/A	#N/A	0	0	#N/A	#N/A	0	0	#N/A	#N/A	0
hsa-miR-520c-3p				0	#N/A	#N/A	#N/A	#N/A	#N/A	0	#N/A	#N/A	0	0	#N/A	#N/A	0	0	#N/A	#N/A	0	0	#N/A	#N/A	0	0	#N/A	#N/A	0	0	#N/A	#N/A	0
hsa-miR-520e-3p				0	#N/A	#N/A	#N/A	#N/A	#N/A	0	#N/A	#N/A	0	0	#N/A	#N/A	0	0	#N/A	#N/A	0	0	#N/A	#N/A	0	0	#N/A	#N/A	0	0	#N/A	#N/A	0
hsa-miR-520d-3p				0	#N/A	#N/A	#N/A	#N/A	#N/A	0	#N/A	#N/A	0	0	#N/A	#N/A	0	0	#N/A	#N/A	0	0	#N/A	#N/A	0	0	#N/A	#N/A	0	0	#N/A	#N/A	0
hsa-miR-148a-5p				0	#N/A	#N/A	#N/A	#N/A	#N/A	0	#N/A	#N/A	0	0	#N/A	#N/A	0	0	#N/A	#N/A	0	0	#N/A	#N/A	0	0	#N/A	#N/A	0	0	#N/A	#N/A	0
hsa-miR-1277-5p				0	#N/A	#N/A	#N/A	#N/A	#N/A	0	#N/A	#N/A	0	0	#N/A	#N/A	0	0	#N/A	#N/A	0	0	#N/A	#N/A	0	0	#N/A	#N/A	0	0	#N/A	#N/A	0
hsa-miR-4517				0	#N/A	#N/A	#N/A	#N/A	#N/A	0	#N/A	#N/A	0	0	#N/A	#N/A	0	0	#N/A	#N/A	0	0	#N/A	#N/A	0	0	#N/A	#N/A	0	0	#N/A	#N/A	0
hsa-miR-216b-5p				0	#N/A	#N/A	#N/A	#N/A	#N/A	0	#N/A	#N/A	0	0	#N/A	#N/A	0	0	#N/A	#N/A	0	0	#N/A	#N/A	0	0	#N/A	#N/A	0	0	#N/A	#N/A	0
hsa-miR-4506				0	#N/A	#N/A	#N/A	#N/A	#N/A	0	#N/A	#N/A	0	0	#N/A	#N/A	0	0	#N/A	#N/A	0	0	#N/A	#N/A	0	0	#N/A	#N/A	0	0	#N/A	#N/A	0
hsa-miR-513b-3p				0	#N/A	#N/A	#N/A	#N/A	#N/A	0	#N/A	#N/A	0	0	#N/A	#N/A	0	0	#N/A	#N/A	0	0	#N/A	#N/A	0	0	#N/A	#N/A	0	0	#N/A	#N/A	0
hsa-miR-944				0	#N/A	#N/A	#N/A	#N/A	#N/A	0	#N/A	#N/A	0	0	#N/A	#N/A	0	0	#N/A	#N/A	0	0	#N/A	#N/A	0	0	#N/A	#N/A	0	0	#N/A	#N/A	0
hsa-miR-4760-3p				0	#N/A	#N/A	#N/A	#N/A	#N/A	0	#N/A	#N/A	0	0	#N/A	#N/A	0	0	#N/A	#N/A	0	0	#N/A	#N/A	0	0	#N/A	#N/A	0	0	#N/A	#N/A	0
hsa-miR-3529-3p				0	#N/A	#N/A	#N/A	#N/A	#N/A	0	#N/A	#N/A	0	0	#N/A	#N/A	0	0	#N/A	#N/A	0	0	#N/A	#N/A	0	0	#N/A	#N/A	0	0	#N/A	#N/A	0
hsa-miR-338-5p				0	#N/A	#N/A	#N/A	#N/A	#N/A	0	#N/A	#N/A	0	0	#N/A	#N/A	0	0	#N/A	#N/A	0	0	#N/A	#N/A	0	0	#N/A	#N/A	0	0	#N/A	#N/A	0
hsa-miR-362-3p				0	#N/A	#N/A	#N/A	#N/A	#N/A	0	#N/A	#N/A	0	0	#N/A	#N/A	0	0	#N/A	#N/A	0	0	#N/A	#N/A	0	0	#N/A	#N/A	0	0	#N/A	#N/A	0
hsa-miR-329-3p				0	#N/A	#N/A	#N/A	#N/A	#N/A	0	#N/A	#N/A	0	0	#N/A	#N/A	0	0	#N/A	#N/A	0	0	#N/A	#N/A	0	0	#N/A	#N/A	0	0	#N/A	#N/A	0
hsa-miR-6757-3p				0	#N/A	#N/A	#N/A	#N/A	#N/A	0	#N/A	#N/A	0	0	#N/A	#N/A	0	0	#N/A	#N/A	0	0	#N/A	#N/A	0	0	#N/A	#N/A	0	0	#N/A	#N/A	0
hsa-miR-552-3p				0	#N/A	#N/A	#N/A	#N/A	#N/A	0	#N/A	#N/A	0	0	#N/A	#N/A	0	0	#N/A	#N/A	0	0	#N/A	#N/A	0	0	#N/A	#N/A	0	0	#N/A	#N/A	0
hsa-miR-376c-3p				2.33333	-1.01186	-0.0170044	0.992878	0.992878	1	7	#N/A	#N/A	195.648	0	#N/A	#N/A	0	0	#N/A	#N/A	0	6	#N/A	#N/A	250.678	0	#N/A	#N/A	0	0	#N/A	#N/A	0
hsa-miR-499a-3p				0	#N/A	#N/A	#N/A	#N/A	#N/A	0	#N/A	#N/A	0	0	#N/A	#N/A	0	0	#N/A	#N/A	0	0	#N/A	#N/A	0	0	#N/A	#N/A	0	0	#N/A	#N/A	0
hsa-miR-499b-3p				0	#N/A	#N/A	#N/A	#N/A	#N/A	0	#N/A	#N/A	0	0	#N/A	#N/A	0	0	#N/A	#N/A	0	0	#N/A	#N/A	0	0	#N/A	#N/A	0	0	#N/A	#N/A	0
hsa-miR-181c-5p				0.666667	4.18982	2.06689	0.413677	0.775924	1	0	#N/A	#N/A	0	0	#N/A	#N/A	0	0	#N/A	#N/A	0	1	#N/A	#N/A	41.7796	0	#N/A	#N/A	0	1	#N/A	#N/A	135.262
hsa-miR-181a-5p				54	-1.41021	-0.495912	0.769881	0.96669	1	46	#N/A	#N/A	1285.69	4	#N/A	#N/A	2044.33	112	#N/A	#N/A	3994.49	43	#N/A	#N/A	1796.52	0	#N/A	#N/A	0	26	#N/A	#N/A	3516.81
hsa-miR-181b-5p				4.66667	-1.56018	-0.641709	0.714459	0.96669	1	11	#N/A	#N/A	307.447	1	#N/A	#N/A	511.083	2	#N/A	#N/A	71.3302	4	#N/A	#N/A	167.118	0	#N/A	#N/A	0	3	#N/A	#N/A	405.786
hsa-miR-181d-5p				0.666667	4.18982	2.06689	0.415203	0.775924	1	0	#N/A	#N/A	0	0	#N/A	#N/A	0	0	#N/A	#N/A	0	1	#N/A	#N/A	41.7796	0	#N/A	#N/A	0	1	#N/A	#N/A	135.262
hsa-miR-1255b-2-3p				0	#N/A	#N/A	#N/A	#N/A	#N/A	0	#N/A	#N/A	0	0	#N/A	#N/A	0	0	#N/A	#N/A	0	0	#N/A	#N/A	0	0	#N/A	#N/A	0	0	#N/A	#N/A	0
hsa-miR-634				0	#N/A	#N/A	#N/A	#N/A	#N/A	0	#N/A	#N/A	0	0	#N/A	#N/A	0	0	#N/A	#N/A	0	0	#N/A	#N/A	0	0	#N/A	#N/A	0	0	#N/A	#N/A	0
hsa-miR-181c-3p				0	#N/A	#N/A	#N/A	#N/A	#N/A	0	#N/A	#N/A	0	0	#N/A	#N/A	0	0	#N/A	#N/A	0	0	#N/A	#N/A	0	0	#N/A	#N/A	0	0	#N/A	#N/A	0
hsa-miR-4482-5p				0	#N/A	#N/A	#N/A	#N/A	#N/A	0	#N/A	#N/A	0	0	#N/A	#N/A	0	0	#N/A	#N/A	0	0	#N/A	#N/A	0	0	#N/A	#N/A	0	0	#N/A	#N/A	0
hsa-miR-5195-5p				0	#N/A	#N/A	#N/A	#N/A	#N/A	0	#N/A	#N/A	0	0	#N/A	#N/A	0	0	#N/A	#N/A	0	0	#N/A	#N/A	0	0	#N/A	#N/A	0	0	#N/A	#N/A	0
hsa-miR-100-5p				479.333	-1.3922	-0.477368	0.804059	0.96669	1	935	#N/A	#N/A	26133	0	#N/A	#N/A	0	503	#N/A	#N/A	17939.5	633	#N/A	#N/A	26446.5	248	#N/A	#N/A	4813.64	4	#N/A	#N/A	541.048
hsa-miR-99a-5p				50.6667	-1.10659	-0.146122	0.946596	0.980646	1	151	#N/A	#N/A	4220.4	0	#N/A	#N/A	0	1	#N/A	#N/A	35.6651	88	#N/A	#N/A	3676.61	2	#N/A	#N/A	38.8197	2	#N/A	#N/A	270.524
hsa-miR-6813-3p				0	#N/A	#N/A	#N/A	#N/A	#N/A	0	#N/A	#N/A	0	0	#N/A	#N/A	0	0	#N/A	#N/A	0	0	#N/A	#N/A	0	0	#N/A	#N/A	0	0	#N/A	#N/A	0
hsa-miR-521				0	#N/A	#N/A	#N/A	#N/A	#N/A	0	#N/A	#N/A	0	0	#N/A	#N/A	0	0	#N/A	#N/A	0	0	#N/A	#N/A	0	0	#N/A	#N/A	0	0	#N/A	#N/A	0
hsa-miR-122-3p				0	#N/A	#N/A	#N/A	#N/A	#N/A	0	#N/A	#N/A	0	0	#N/A	#N/A	0	0	#N/A	#N/A	0	0	#N/A	#N/A	0	0	#N/A	#N/A	0	0	#N/A	#N/A	0
hsa-miR-548al				0	#N/A	#N/A	#N/A	#N/A	#N/A	0	#N/A	#N/A	0	0	#N/A	#N/A	0	0	#N/A	#N/A	0	0	#N/A	#N/A	0	0	#N/A	#N/A	0	0	#N/A	#N/A	0
hsa-miR-4681				0	#N/A	#N/A	#N/A	#N/A	#N/A	0	#N/A	#N/A	0	0	#N/A	#N/A	0	0	#N/A	#N/A	0	0	#N/A	#N/A	0	0	#N/A	#N/A	0	0	#N/A	#N/A	0
hsa-miR-4661-5p				0	#N/A	#N/A	#N/A	#N/A	#N/A	0	#N/A	#N/A	0	0	#N/A	#N/A	0	0	#N/A	#N/A	0	0	#N/A	#N/A	0	0	#N/A	#N/A	0	0	#N/A	#N/A	0
hsa-miR-3923				0	#N/A	#N/A	#N/A	#N/A	#N/A	0	#N/A	#N/A	0	0	#N/A	#N/A	0	0	#N/A	#N/A	0	0	#N/A	#N/A	0	0	#N/A	#N/A	0	0	#N/A	#N/A	0
hsa-miR-4798-3p				0	#N/A	#N/A	#N/A	#N/A	#N/A	0	#N/A	#N/A	0	0	#N/A	#N/A	0	0	#N/A	#N/A	0	0	#N/A	#N/A	0	0	#N/A	#N/A	0	0	#N/A	#N/A	0
hsa-miR-3145-5p				0	#N/A	#N/A	#N/A	#N/A	#N/A	0	#N/A	#N/A	0	0	#N/A	#N/A	0	0	#N/A	#N/A	0	0	#N/A	#N/A	0	0	#N/A	#N/A	0	0	#N/A	#N/A	0
hsa-miR-4636				0	#N/A	#N/A	#N/A	#N/A	#N/A	0	#N/A	#N/A	0	0	#N/A	#N/A	0	0	#N/A	#N/A	0	0	#N/A	#N/A	0	0	#N/A	#N/A	0	0	#N/A	#N/A	0
hsa-miR-5684				0	#N/A	#N/A	#N/A	#N/A	#N/A	0	#N/A	#N/A	0	0	#N/A	#N/A	0	0	#N/A	#N/A	0	0	#N/A	#N/A	0	0	#N/A	#N/A	0	0	#N/A	#N/A	0
hsa-miR-4714-5p				0	#N/A	#N/A	#N/A	#N/A	#N/A	0	#N/A	#N/A	0	0	#N/A	#N/A	0	0	#N/A	#N/A	0	0	#N/A	#N/A	0	0	#N/A	#N/A	0	0	#N/A	#N/A	0
hsa-miR-3664-5p				0	#N/A	#N/A	#N/A	#N/A	#N/A	0	#N/A	#N/A	0	0	#N/A	#N/A	0	0	#N/A	#N/A	0	0	#N/A	#N/A	0	0	#N/A	#N/A	0	0	#N/A	#N/A	0
hsa-miR-4724-5p				0	#N/A	#N/A	#N/A	#N/A	#N/A	0	#N/A	#N/A	0	0	#N/A	#N/A	0	0	#N/A	#N/A	0	0	#N/A	#N/A	0	0	#N/A	#N/A	0	0	#N/A	#N/A	0
hsa-miR-1243				0	#N/A	#N/A	#N/A	#N/A	#N/A	0	#N/A	#N/A	0	0	#N/A	#N/A	0	0	#N/A	#N/A	0	0	#N/A	#N/A	0	0	#N/A	#N/A	0	0	#N/A	#N/A	0
hsa-miR-193b-3p				1.66667	1.10897	0.149222	0.94184	0.980646	1	0	#N/A	#N/A	0	0	#N/A	#N/A	0	5	#N/A	#N/A	178.326	2	#N/A	#N/A	83.5592	0	#N/A	#N/A	0	2	#N/A	#N/A	270.524
hsa-miR-193a-3p				0	#N/A	#N/A	#N/A	#N/A	#N/A	0	#N/A	#N/A	0	0	#N/A	#N/A	0	0	#N/A	#N/A	0	0	#N/A	#N/A	0	0	#N/A	#N/A	0	0	#N/A	#N/A	0
hsa-miR-452-5p				0	#N/A	#N/A	#N/A	#N/A	#N/A	0	#N/A	#N/A	0	0	#N/A	#N/A	0	0	#N/A	#N/A	0	0	#N/A	#N/A	0	0	#N/A	#N/A	0	0	#N/A	#N/A	0
hsa-miR-5197-3p				0	#N/A	#N/A	#N/A	#N/A	#N/A	0	#N/A	#N/A	0	0	#N/A	#N/A	0	0	#N/A	#N/A	0	0	#N/A	#N/A	0	0	#N/A	#N/A	0	0	#N/A	#N/A	0
hsa-miR-483-5p				0	#N/A	#N/A	#N/A	#N/A	#N/A	0	#N/A	#N/A	0	0	#N/A	#N/A	0	0	#N/A	#N/A	0	0	#N/A	#N/A	0	0	#N/A	#N/A	0	0	#N/A	#N/A	0
hsa-miR-4499				0	#N/A	#N/A	#N/A	#N/A	#N/A	0	#N/A	#N/A	0	0	#N/A	#N/A	0	0	#N/A	#N/A	0	0	#N/A	#N/A	0	0	#N/A	#N/A	0	0	#N/A	#N/A	0
hsa-miR-3925-5p				0	#N/A	#N/A	#N/A	#N/A	#N/A	0	#N/A	#N/A	0	0	#N/A	#N/A	0	0	#N/A	#N/A	0	0	#N/A	#N/A	0	0	#N/A	#N/A	0	0	#N/A	#N/A	0
hsa-miR-6856-5p				0	#N/A	#N/A	#N/A	#N/A	#N/A	0	#N/A	#N/A	0	0	#N/A	#N/A	0	0	#N/A	#N/A	0	0	#N/A	#N/A	0	0	#N/A	#N/A	0	0	#N/A	#N/A	0
hsa-miR-3916				0	#N/A	#N/A	#N/A	#N/A	#N/A	0	#N/A	#N/A	0	0	#N/A	#N/A	0	0	#N/A	#N/A	0	0	#N/A	#N/A	0	0	#N/A	#N/A	0	0	#N/A	#N/A	0
hsa-miR-576-3p				0	#N/A	#N/A	#N/A	#N/A	#N/A	0	#N/A	#N/A	0	0	#N/A	#N/A	0	0	#N/A	#N/A	0	0	#N/A	#N/A	0	0	#N/A	#N/A	0	0	#N/A	#N/A	0
hsa-miR-3942-5p				0	#N/A	#N/A	#N/A	#N/A	#N/A	0	#N/A	#N/A	0	0	#N/A	#N/A	0	0	#N/A	#N/A	0	0	#N/A	#N/A	0	0	#N/A	#N/A	0	0	#N/A	#N/A	0
hsa-miR-6838-5p				0	#N/A	#N/A	#N/A	#N/A	#N/A	0	#N/A	#N/A	0	0	#N/A	#N/A	0	0	#N/A	#N/A	0	0	#N/A	#N/A	0	0	#N/A	#N/A	0	0	#N/A	#N/A	0
hsa-miR-646				0	#N/A	#N/A	#N/A	#N/A	#N/A	0	#N/A	#N/A	0	0	#N/A	#N/A	0	0	#N/A	#N/A	0	0	#N/A	#N/A	0	0	#N/A	#N/A	0	0	#N/A	#N/A	0
hsa-miR-1179				0	#N/A	#N/A	#N/A	#N/A	#N/A	0	#N/A	#N/A	0	0	#N/A	#N/A	0	0	#N/A	#N/A	0	0	#N/A	#N/A	0	0	#N/A	#N/A	0	0	#N/A	#N/A	0
hsa-miR-6779-3p				0	#N/A	#N/A	#N/A	#N/A	#N/A	0	#N/A	#N/A	0	0	#N/A	#N/A	0	0	#N/A	#N/A	0	0	#N/A	#N/A	0	0	#N/A	#N/A	0	0	#N/A	#N/A	0
hsa-miR-129-2-3p				0	#N/A	#N/A	#N/A	#N/A	#N/A	0	#N/A	#N/A	0	0	#N/A	#N/A	0	0	#N/A	#N/A	0	0	#N/A	#N/A	0	0	#N/A	#N/A	0	0	#N/A	#N/A	0
hsa-miR-129-1-3p				0	#N/A	#N/A	#N/A	#N/A	#N/A	0	#N/A	#N/A	0	0	#N/A	#N/A	0	0	#N/A	#N/A	0	0	#N/A	#N/A	0	0	#N/A	#N/A	0	0	#N/A	#N/A	0
hsa-miR-6819-3p				0	#N/A	#N/A	#N/A	#N/A	#N/A	0	#N/A	#N/A	0	0	#N/A	#N/A	0	0	#N/A	#N/A	0	0	#N/A	#N/A	0	0	#N/A	#N/A	0	0	#N/A	#N/A	0
hsa-miR-596				0	#N/A	#N/A	#N/A	#N/A	#N/A	0	#N/A	#N/A	0	0	#N/A	#N/A	0	0	#N/A	#N/A	0	0	#N/A	#N/A	0	0	#N/A	#N/A	0	0	#N/A	#N/A	0
hsa-miR-4670-5p				0	#N/A	#N/A	#N/A	#N/A	#N/A	0	#N/A	#N/A	0	0	#N/A	#N/A	0	0	#N/A	#N/A	0	0	#N/A	#N/A	0	0	#N/A	#N/A	0	0	#N/A	#N/A	0
hsa-miR-6854-5p				0	#N/A	#N/A	#N/A	#N/A	#N/A	0	#N/A	#N/A	0	0	#N/A	#N/A	0	0	#N/A	#N/A	0	0	#N/A	#N/A	0	0	#N/A	#N/A	0	0	#N/A	#N/A	0
hsa-miR-22-3p				129	1.42601	0.51198	0.783275	0.96669	1	56	#N/A	#N/A	1565.18	0	#N/A	#N/A	0	157	#N/A	#N/A	5599.42	131	#N/A	#N/A	5473.13	254	#N/A	#N/A	4930.1	2	#N/A	#N/A	270.524
hsa-miR-208b-5p				0	#N/A	#N/A	#N/A	#N/A	#N/A	0	#N/A	#N/A	0	0	#N/A	#N/A	0	0	#N/A	#N/A	0	0	#N/A	#N/A	0	0	#N/A	#N/A	0	0	#N/A	#N/A	0
hsa-miR-3914				0	#N/A	#N/A	#N/A	#N/A	#N/A	0	#N/A	#N/A	0	0	#N/A	#N/A	0	0	#N/A	#N/A	0	0	#N/A	#N/A	0	0	#N/A	#N/A	0	0	#N/A	#N/A	0
hsa-miR-6888-5p				0	#N/A	#N/A	#N/A	#N/A	#N/A	0	#N/A	#N/A	0	0	#N/A	#N/A	0	0	#N/A	#N/A	0	0	#N/A	#N/A	0	0	#N/A	#N/A	0	0	#N/A	#N/A	0
hsa-miR-28-5p				0.333333	2.37647	1.24882	0.619958	#N/A	1	0	#N/A	#N/A	0	0	#N/A	#N/A	0	0	#N/A	#N/A	0	1	#N/A	#N/A	41.7796	0	#N/A	#N/A	0	0	#N/A	#N/A	0
hsa-miR-708-5p				0	#N/A	#N/A	#N/A	#N/A	#N/A	0	#N/A	#N/A	0	0	#N/A	#N/A	0	0	#N/A	#N/A	0	0	#N/A	#N/A	0	0	#N/A	#N/A	0	0	#N/A	#N/A	0
hsa-miR-940				0	#N/A	#N/A	#N/A	#N/A	#N/A	0	#N/A	#N/A	0	0	#N/A	#N/A	0	0	#N/A	#N/A	0	0	#N/A	#N/A	0	0	#N/A	#N/A	0	0	#N/A	#N/A	0
hsa-miR-4747-3p				0.333333	-5.81155	-2.53892	0.373246	#N/A	1	1	#N/A	#N/A	27.9497	0	#N/A	#N/A	0	0	#N/A	#N/A	0	0	#N/A	#N/A	0	0	#N/A	#N/A	0	0	#N/A	#N/A	0
hsa-miR-3142				0	#N/A	#N/A	#N/A	#N/A	#N/A	0	#N/A	#N/A	0	0	#N/A	#N/A	0	0	#N/A	#N/A	0	0	#N/A	#N/A	0	0	#N/A	#N/A	0	0	#N/A	#N/A	0
hsa-miR-9500				0	#N/A	#N/A	#N/A	#N/A	#N/A	0	#N/A	#N/A	0	0	#N/A	#N/A	0	0	#N/A	#N/A	0	0	#N/A	#N/A	0	0	#N/A	#N/A	0	0	#N/A	#N/A	0
hsa-miR-7845-5p				0	#N/A	#N/A	#N/A	#N/A	#N/A	0	#N/A	#N/A	0	0	#N/A	#N/A	0	0	#N/A	#N/A	0	0	#N/A	#N/A	0	0	#N/A	#N/A	0	0	#N/A	#N/A	0
hsa-miR-4739				0	#N/A	#N/A	#N/A	#N/A	#N/A	0	#N/A	#N/A	0	0	#N/A	#N/A	0	0	#N/A	#N/A	0	0	#N/A	#N/A	0	0	#N/A	#N/A	0	0	#N/A	#N/A	0
hsa-miR-3158-3p				0	#N/A	#N/A	#N/A	#N/A	#N/A	0	#N/A	#N/A	0	0	#N/A	#N/A	0	0	#N/A	#N/A	0	0	#N/A	#N/A	0	0	#N/A	#N/A	0	0	#N/A	#N/A	0
hsa-miR-6743-5p				0	#N/A	#N/A	#N/A	#N/A	#N/A	0	#N/A	#N/A	0	0	#N/A	#N/A	0	0	#N/A	#N/A	0	0	#N/A	#N/A	0	0	#N/A	#N/A	0	0	#N/A	#N/A	0
hsa-miR-6085				0	#N/A	#N/A	#N/A	#N/A	#N/A	0	#N/A	#N/A	0	0	#N/A	#N/A	0	0	#N/A	#N/A	0	0	#N/A	#N/A	0	0	#N/A	#N/A	0	0	#N/A	#N/A	0
hsa-miR-4716-3p				0	#N/A	#N/A	#N/A	#N/A	#N/A	0	#N/A	#N/A	0	0	#N/A	#N/A	0	0	#N/A	#N/A	0	0	#N/A	#N/A	0	0	#N/A	#N/A	0	0	#N/A	#N/A	0
hsa-miR-4678				0	#N/A	#N/A	#N/A	#N/A	#N/A	0	#N/A	#N/A	0	0	#N/A	#N/A	0	0	#N/A	#N/A	0	0	#N/A	#N/A	0	0	#N/A	#N/A	0	0	#N/A	#N/A	0
hsa-miR-4464				0	#N/A	#N/A	#N/A	#N/A	#N/A	0	#N/A	#N/A	0	0	#N/A	#N/A	0	0	#N/A	#N/A	0	0	#N/A	#N/A	0	0	#N/A	#N/A	0	0	#N/A	#N/A	0
hsa-miR-1244				0	#N/A	#N/A	#N/A	#N/A	#N/A	0	#N/A	#N/A	0	0	#N/A	#N/A	0	0	#N/A	#N/A	0	0	#N/A	#N/A	0	0	#N/A	#N/A	0	0	#N/A	#N/A	0
hsa-miR-5588-3p				0	#N/A	#N/A	#N/A	#N/A	#N/A	0	#N/A	#N/A	0	0	#N/A	#N/A	0	0	#N/A	#N/A	0	0	#N/A	#N/A	0	0	#N/A	#N/A	0	0	#N/A	#N/A	0
hsa-miR-6838-3p				0	#N/A	#N/A	#N/A	#N/A	#N/A	0	#N/A	#N/A	0	0	#N/A	#N/A	0	0	#N/A	#N/A	0	0	#N/A	#N/A	0	0	#N/A	#N/A	0	0	#N/A	#N/A	0
hsa-miR-1245a				0	#N/A	#N/A	#N/A	#N/A	#N/A	0	#N/A	#N/A	0	0	#N/A	#N/A	0	0	#N/A	#N/A	0	0	#N/A	#N/A	0	0	#N/A	#N/A	0	0	#N/A	#N/A	0
hsa-miR-371b-3p				0	#N/A	#N/A	#N/A	#N/A	#N/A	0	#N/A	#N/A	0	0	#N/A	#N/A	0	0	#N/A	#N/A	0	0	#N/A	#N/A	0	0	#N/A	#N/A	0	0	#N/A	#N/A	0
hsa-miR-371a-3p				0	#N/A	#N/A	#N/A	#N/A	#N/A	0	#N/A	#N/A	0	0	#N/A	#N/A	0	0	#N/A	#N/A	0	0	#N/A	#N/A	0	0	#N/A	#N/A	0	0	#N/A	#N/A	0
hsa-miR-519e-3p				0	#N/A	#N/A	#N/A	#N/A	#N/A	0	#N/A	#N/A	0	0	#N/A	#N/A	0	0	#N/A	#N/A	0	0	#N/A	#N/A	0	0	#N/A	#N/A	0	0	#N/A	#N/A	0
hsa-miR-512-3p				0	#N/A	#N/A	#N/A	#N/A	#N/A	0	#N/A	#N/A	0	0	#N/A	#N/A	0	0	#N/A	#N/A	0	0	#N/A	#N/A	0	0	#N/A	#N/A	0	0	#N/A	#N/A	0
hsa-miR-520f-3p				0	#N/A	#N/A	#N/A	#N/A	#N/A	0	#N/A	#N/A	0	0	#N/A	#N/A	0	0	#N/A	#N/A	0	0	#N/A	#N/A	0	0	#N/A	#N/A	0	0	#N/A	#N/A	0
hsa-miR-648				0	#N/A	#N/A	#N/A	#N/A	#N/A	0	#N/A	#N/A	0	0	#N/A	#N/A	0	0	#N/A	#N/A	0	0	#N/A	#N/A	0	0	#N/A	#N/A	0	0	#N/A	#N/A	0
hsa-miR-148b-5p				0	#N/A	#N/A	#N/A	#N/A	#N/A	0	#N/A	#N/A	0	0	#N/A	#N/A	0	0	#N/A	#N/A	0	0	#N/A	#N/A	0	0	#N/A	#N/A	0	0	#N/A	#N/A	0
hsa-miR-4715-5p				0	#N/A	#N/A	#N/A	#N/A	#N/A	0	#N/A	#N/A	0	0	#N/A	#N/A	0	0	#N/A	#N/A	0	0	#N/A	#N/A	0	0	#N/A	#N/A	0	0	#N/A	#N/A	0
hsa-miR-5590-3p				0	#N/A	#N/A	#N/A	#N/A	#N/A	0	#N/A	#N/A	0	0	#N/A	#N/A	0	0	#N/A	#N/A	0	0	#N/A	#N/A	0	0	#N/A	#N/A	0	0	#N/A	#N/A	0
hsa-miR-369-3p				0	#N/A	#N/A	#N/A	#N/A	#N/A	0	#N/A	#N/A	0	0	#N/A	#N/A	0	0	#N/A	#N/A	0	0	#N/A	#N/A	0	0	#N/A	#N/A	0	0	#N/A	#N/A	0
hsa-miR-5692b				0	#N/A	#N/A	#N/A	#N/A	#N/A	0	#N/A	#N/A	0	0	#N/A	#N/A	0	0	#N/A	#N/A	0	0	#N/A	#N/A	0	0	#N/A	#N/A	0	0	#N/A	#N/A	0
hsa-miR-5692c				0	#N/A	#N/A	#N/A	#N/A	#N/A	0	#N/A	#N/A	0	0	#N/A	#N/A	0	0	#N/A	#N/A	0	0	#N/A	#N/A	0	0	#N/A	#N/A	0	0	#N/A	#N/A	0
hsa-miR-7705				0	#N/A	#N/A	#N/A	#N/A	#N/A	0	#N/A	#N/A	0	0	#N/A	#N/A	0	0	#N/A	#N/A	0	0	#N/A	#N/A	0	0	#N/A	#N/A	0	0	#N/A	#N/A	0
hsa-miR-1295b-3p				0	#N/A	#N/A	#N/A	#N/A	#N/A	0	#N/A	#N/A	0	0	#N/A	#N/A	0	0	#N/A	#N/A	0	0	#N/A	#N/A	0	0	#N/A	#N/A	0	0	#N/A	#N/A	0
hsa-miR-410-3p				0	#N/A	#N/A	#N/A	#N/A	#N/A	0	#N/A	#N/A	0	0	#N/A	#N/A	0	0	#N/A	#N/A	0	0	#N/A	#N/A	0	0	#N/A	#N/A	0	0	#N/A	#N/A	0
hsa-miR-656-3p				0	#N/A	#N/A	#N/A	#N/A	#N/A	0	#N/A	#N/A	0	0	#N/A	#N/A	0	0	#N/A	#N/A	0	0	#N/A	#N/A	0	0	#N/A	#N/A	0	0	#N/A	#N/A	0
hsa-miR-34c-3p				0	#N/A	#N/A	#N/A	#N/A	#N/A	0	#N/A	#N/A	0	0	#N/A	#N/A	0	0	#N/A	#N/A	0	0	#N/A	#N/A	0	0	#N/A	#N/A	0	0	#N/A	#N/A	0
hsa-miR-5094				0	#N/A	#N/A	#N/A	#N/A	#N/A	0	#N/A	#N/A	0	0	#N/A	#N/A	0	0	#N/A	#N/A	0	0	#N/A	#N/A	0	0	#N/A	#N/A	0	0	#N/A	#N/A	0
hsa-miR-154-3p				0	#N/A	#N/A	#N/A	#N/A	#N/A	0	#N/A	#N/A	0	0	#N/A	#N/A	0	0	#N/A	#N/A	0	0	#N/A	#N/A	0	0	#N/A	#N/A	0	0	#N/A	#N/A	0
hsa-miR-487a-3p				0.333333	-5.81155	-2.53892	0.373246	#N/A	1	1	#N/A	#N/A	27.9497	0	#N/A	#N/A	0	0	#N/A	#N/A	0	0	#N/A	#N/A	0	0	#N/A	#N/A	0	0	#N/A	#N/A	0
hsa-miR-96-3p				0	#N/A	#N/A	#N/A	#N/A	#N/A	0	#N/A	#N/A	0	0	#N/A	#N/A	0	0	#N/A	#N/A	0	0	#N/A	#N/A	0	0	#N/A	#N/A	0	0	#N/A	#N/A	0
hsa-miR-382-3p				0	#N/A	#N/A	#N/A	#N/A	#N/A	0	#N/A	#N/A	0	0	#N/A	#N/A	0	0	#N/A	#N/A	0	0	#N/A	#N/A	0	0	#N/A	#N/A	0	0	#N/A	#N/A	0
hsa-miR-5092				0	#N/A	#N/A	#N/A	#N/A	#N/A	0	#N/A	#N/A	0	0	#N/A	#N/A	0	0	#N/A	#N/A	0	0	#N/A	#N/A	0	0	#N/A	#N/A	0	0	#N/A	#N/A	0
hsa-miR-4733-5p				0	#N/A	#N/A	#N/A	#N/A	#N/A	0	#N/A	#N/A	0	0	#N/A	#N/A	0	0	#N/A	#N/A	0	0	#N/A	#N/A	0	0	#N/A	#N/A	0	0	#N/A	#N/A	0
hsa-miR-500b-5p				0	#N/A	#N/A	#N/A	#N/A	#N/A	0	#N/A	#N/A	0	0	#N/A	#N/A	0	0	#N/A	#N/A	0	0	#N/A	#N/A	0	0	#N/A	#N/A	0	0	#N/A	#N/A	0
hsa-miR-362-5p				0	#N/A	#N/A	#N/A	#N/A	#N/A	0	#N/A	#N/A	0	0	#N/A	#N/A	0	0	#N/A	#N/A	0	0	#N/A	#N/A	0	0	#N/A	#N/A	0	0	#N/A	#N/A	0
hsa-miR-501-5p				0	#N/A	#N/A	#N/A	#N/A	#N/A	0	#N/A	#N/A	0	0	#N/A	#N/A	0	0	#N/A	#N/A	0	0	#N/A	#N/A	0	0	#N/A	#N/A	0	0	#N/A	#N/A	0
hsa-miR-5188				0	#N/A	#N/A	#N/A	#N/A	#N/A	0	#N/A	#N/A	0	0	#N/A	#N/A	0	0	#N/A	#N/A	0	0	#N/A	#N/A	0	0	#N/A	#N/A	0	0	#N/A	#N/A	0
hsa-miR-487b-3p				17.3333	36.1109	5.17436	0.0683054	0.393439	1	1	#N/A	#N/A	27.9497	0	#N/A	#N/A	0	0	#N/A	#N/A	0	52	#N/A	#N/A	2172.54	0	#N/A	#N/A	0	0	#N/A	#N/A	0
hsa-miR-3200-5p				0	#N/A	#N/A	#N/A	#N/A	#N/A	0	#N/A	#N/A	0	0	#N/A	#N/A	0	0	#N/A	#N/A	0	0	#N/A	#N/A	0	0	#N/A	#N/A	0	0	#N/A	#N/A	0
hsa-miR-425-5p				0.333333	-5.81155	-2.53892	0.373246	#N/A	1	1	#N/A	#N/A	27.9497	0	#N/A	#N/A	0	0	#N/A	#N/A	0	0	#N/A	#N/A	0	0	#N/A	#N/A	0	0	#N/A	#N/A	0
hsa-miR-4712-3p				0	#N/A	#N/A	#N/A	#N/A	#N/A	0	#N/A	#N/A	0	0	#N/A	#N/A	0	0	#N/A	#N/A	0	0	#N/A	#N/A	0	0	#N/A	#N/A	0	0	#N/A	#N/A	0
hsa-miR-501-3p				0	#N/A	#N/A	#N/A	#N/A	#N/A	0	#N/A	#N/A	0	0	#N/A	#N/A	0	0	#N/A	#N/A	0	0	#N/A	#N/A	0	0	#N/A	#N/A	0	0	#N/A	#N/A	0
hsa-miR-502-3p				0	#N/A	#N/A	#N/A	#N/A	#N/A	0	#N/A	#N/A	0	0	#N/A	#N/A	0	0	#N/A	#N/A	0	0	#N/A	#N/A	0	0	#N/A	#N/A	0	0	#N/A	#N/A	0
hsa-miR-1246				0	#N/A	#N/A	#N/A	#N/A	#N/A	0	#N/A	#N/A	0	0	#N/A	#N/A	0	0	#N/A	#N/A	0	0	#N/A	#N/A	0	0	#N/A	#N/A	0	0	#N/A	#N/A	0
hsa-miR-652-3p				23	147.957	7.20903	0.0310534	0.343683	1	0	#N/A	#N/A	0	0	#N/A	#N/A	0	0	#N/A	#N/A	0	68	#N/A	#N/A	2841.01	0	#N/A	#N/A	0	1	#N/A	#N/A	135.262
hsa-miR-889-5p				0	#N/A	#N/A	#N/A	#N/A	#N/A	0	#N/A	#N/A	0	0	#N/A	#N/A	0	0	#N/A	#N/A	0	0	#N/A	#N/A	0	0	#N/A	#N/A	0	0	#N/A	#N/A	0
hsa-miR-4495				0	#N/A	#N/A	#N/A	#N/A	#N/A	0	#N/A	#N/A	0	0	#N/A	#N/A	0	0	#N/A	#N/A	0	0	#N/A	#N/A	0	0	#N/A	#N/A	0	0	#N/A	#N/A	0
hsa-miR-3668				0	#N/A	#N/A	#N/A	#N/A	#N/A	0	#N/A	#N/A	0	0	#N/A	#N/A	0	0	#N/A	#N/A	0	0	#N/A	#N/A	0	0	#N/A	#N/A	0	0	#N/A	#N/A	0
hsa-miR-4657				0	#N/A	#N/A	#N/A	#N/A	#N/A	0	#N/A	#N/A	0	0	#N/A	#N/A	0	0	#N/A	#N/A	0	0	#N/A	#N/A	0	0	#N/A	#N/A	0	0	#N/A	#N/A	0
hsa-miR-4491				0	#N/A	#N/A	#N/A	#N/A	#N/A	0	#N/A	#N/A	0	0	#N/A	#N/A	0	0	#N/A	#N/A	0	0	#N/A	#N/A	0	0	#N/A	#N/A	0	0	#N/A	#N/A	0
hsa-miR-511-3p				0	#N/A	#N/A	#N/A	#N/A	#N/A	0	#N/A	#N/A	0	0	#N/A	#N/A	0	0	#N/A	#N/A	0	0	#N/A	#N/A	0	0	#N/A	#N/A	0	0	#N/A	#N/A	0
hsa-miR-4781-3p				0	#N/A	#N/A	#N/A	#N/A	#N/A	0	#N/A	#N/A	0	0	#N/A	#N/A	0	0	#N/A	#N/A	0	0	#N/A	#N/A	0	0	#N/A	#N/A	0	0	#N/A	#N/A	0
hsa-miR-4307				0	#N/A	#N/A	#N/A	#N/A	#N/A	0	#N/A	#N/A	0	0	#N/A	#N/A	0	0	#N/A	#N/A	0	0	#N/A	#N/A	0	0	#N/A	#N/A	0	0	#N/A	#N/A	0
hsa-miR-10399-5p				0	#N/A	#N/A	#N/A	#N/A	#N/A	0	#N/A	#N/A	0	0	#N/A	#N/A	0	0	#N/A	#N/A	0	0	#N/A	#N/A	0	0	#N/A	#N/A	0	0	#N/A	#N/A	0
hsa-miR-3938				0	#N/A	#N/A	#N/A	#N/A	#N/A	0	#N/A	#N/A	0	0	#N/A	#N/A	0	0	#N/A	#N/A	0	0	#N/A	#N/A	0	0	#N/A	#N/A	0	0	#N/A	#N/A	0
hsa-miR-4778-5p				0	#N/A	#N/A	#N/A	#N/A	#N/A	0	#N/A	#N/A	0	0	#N/A	#N/A	0	0	#N/A	#N/A	0	0	#N/A	#N/A	0	0	#N/A	#N/A	0	0	#N/A	#N/A	0
hsa-miR-363-3p				0	#N/A	#N/A	#N/A	#N/A	#N/A	0	#N/A	#N/A	0	0	#N/A	#N/A	0	0	#N/A	#N/A	0	0	#N/A	#N/A	0	0	#N/A	#N/A	0	0	#N/A	#N/A	0
hsa-miR-367-3p				0	#N/A	#N/A	#N/A	#N/A	#N/A	0	#N/A	#N/A	0	0	#N/A	#N/A	0	0	#N/A	#N/A	0	0	#N/A	#N/A	0	0	#N/A	#N/A	0	0	#N/A	#N/A	0
hsa-miR-4699-3p				0	#N/A	#N/A	#N/A	#N/A	#N/A	0	#N/A	#N/A	0	0	#N/A	#N/A	0	0	#N/A	#N/A	0	0	#N/A	#N/A	0	0	#N/A	#N/A	0	0	#N/A	#N/A	0
hsa-miR-5002-5p				0	#N/A	#N/A	#N/A	#N/A	#N/A	0	#N/A	#N/A	0	0	#N/A	#N/A	0	0	#N/A	#N/A	0	0	#N/A	#N/A	0	0	#N/A	#N/A	0	0	#N/A	#N/A	0
hsa-miR-3613-3p				0	#N/A	#N/A	#N/A	#N/A	#N/A	0	#N/A	#N/A	0	0	#N/A	#N/A	0	0	#N/A	#N/A	0	0	#N/A	#N/A	0	0	#N/A	#N/A	0	0	#N/A	#N/A	0
hsa-miR-3973				0	#N/A	#N/A	#N/A	#N/A	#N/A	0	#N/A	#N/A	0	0	#N/A	#N/A	0	0	#N/A	#N/A	0	0	#N/A	#N/A	0	0	#N/A	#N/A	0	0	#N/A	#N/A	0
hsa-miR-520h				0	#N/A	#N/A	#N/A	#N/A	#N/A	0	#N/A	#N/A	0	0	#N/A	#N/A	0	0	#N/A	#N/A	0	0	#N/A	#N/A	0	0	#N/A	#N/A	0	0	#N/A	#N/A	0
hsa-miR-520g-3p				0	#N/A	#N/A	#N/A	#N/A	#N/A	0	#N/A	#N/A	0	0	#N/A	#N/A	0	0	#N/A	#N/A	0	0	#N/A	#N/A	0	0	#N/A	#N/A	0	0	#N/A	#N/A	0
hsa-miR-4709-5p				0	#N/A	#N/A	#N/A	#N/A	#N/A	0	#N/A	#N/A	0	0	#N/A	#N/A	0	0	#N/A	#N/A	0	0	#N/A	#N/A	0	0	#N/A	#N/A	0	0	#N/A	#N/A	0
hsa-miR-4761-5p				0	#N/A	#N/A	#N/A	#N/A	#N/A	0	#N/A	#N/A	0	0	#N/A	#N/A	0	0	#N/A	#N/A	0	0	#N/A	#N/A	0	0	#N/A	#N/A	0	0	#N/A	#N/A	0
hsa-miR-216b-3p				0	#N/A	#N/A	#N/A	#N/A	#N/A	0	#N/A	#N/A	0	0	#N/A	#N/A	0	0	#N/A	#N/A	0	0	#N/A	#N/A	0	0	#N/A	#N/A	0	0	#N/A	#N/A	0
hsa-miR-3681-3p				0	#N/A	#N/A	#N/A	#N/A	#N/A	0	#N/A	#N/A	0	0	#N/A	#N/A	0	0	#N/A	#N/A	0	0	#N/A	#N/A	0	0	#N/A	#N/A	0	0	#N/A	#N/A	0
hsa-miR-4717-3p				0	#N/A	#N/A	#N/A	#N/A	#N/A	0	#N/A	#N/A	0	0	#N/A	#N/A	0	0	#N/A	#N/A	0	0	#N/A	#N/A	0	0	#N/A	#N/A	0	0	#N/A	#N/A	0
hsa-miR-6865-3p				0	#N/A	#N/A	#N/A	#N/A	#N/A	0	#N/A	#N/A	0	0	#N/A	#N/A	0	0	#N/A	#N/A	0	0	#N/A	#N/A	0	0	#N/A	#N/A	0	0	#N/A	#N/A	0
hsa-miR-6760-3p				0	#N/A	#N/A	#N/A	#N/A	#N/A	0	#N/A	#N/A	0	0	#N/A	#N/A	0	0	#N/A	#N/A	0	0	#N/A	#N/A	0	0	#N/A	#N/A	0	0	#N/A	#N/A	0
hsa-miR-6500-3p				0	#N/A	#N/A	#N/A	#N/A	#N/A	0	#N/A	#N/A	0	0	#N/A	#N/A	0	0	#N/A	#N/A	0	0	#N/A	#N/A	0	0	#N/A	#N/A	0	0	#N/A	#N/A	0
hsa-miR-499b-5p				0	#N/A	#N/A	#N/A	#N/A	#N/A	0	#N/A	#N/A	0	0	#N/A	#N/A	0	0	#N/A	#N/A	0	0	#N/A	#N/A	0	0	#N/A	#N/A	0	0	#N/A	#N/A	0
hsa-miR-6847-5p				0	#N/A	#N/A	#N/A	#N/A	#N/A	0	#N/A	#N/A	0	0	#N/A	#N/A	0	0	#N/A	#N/A	0	0	#N/A	#N/A	0	0	#N/A	#N/A	0	0	#N/A	#N/A	0
hsa-miR-10b-3p				0	#N/A	#N/A	#N/A	#N/A	#N/A	0	#N/A	#N/A	0	0	#N/A	#N/A	0	0	#N/A	#N/A	0	0	#N/A	#N/A	0	0	#N/A	#N/A	0	0	#N/A	#N/A	0
hsa-miR-383-3p				0	#N/A	#N/A	#N/A	#N/A	#N/A	0	#N/A	#N/A	0	0	#N/A	#N/A	0	0	#N/A	#N/A	0	0	#N/A	#N/A	0	0	#N/A	#N/A	0	0	#N/A	#N/A	0
hsa-miR-214-3p				0.666667	-9.85774	-3.30126	0.259442	0.651646	1	0	#N/A	#N/A	0	1	#N/A	#N/A	511.083	1	#N/A	#N/A	35.6651	0	#N/A	#N/A	0	0	#N/A	#N/A	0	0	#N/A	#N/A	0
hsa-miR-5685				0	#N/A	#N/A	#N/A	#N/A	#N/A	0	#N/A	#N/A	0	0	#N/A	#N/A	0	0	#N/A	#N/A	0	0	#N/A	#N/A	0	0	#N/A	#N/A	0	0	#N/A	#N/A	0
hsa-miR-4433a-3p				0	#N/A	#N/A	#N/A	#N/A	#N/A	0	#N/A	#N/A	0	0	#N/A	#N/A	0	0	#N/A	#N/A	0	0	#N/A	#N/A	0	0	#N/A	#N/A	0	0	#N/A	#N/A	0
hsa-miR-6715b-5p				0	#N/A	#N/A	#N/A	#N/A	#N/A	0	#N/A	#N/A	0	0	#N/A	#N/A	0	0	#N/A	#N/A	0	0	#N/A	#N/A	0	0	#N/A	#N/A	0	0	#N/A	#N/A	0
hsa-miR-4514				0	#N/A	#N/A	#N/A	#N/A	#N/A	0	#N/A	#N/A	0	0	#N/A	#N/A	0	0	#N/A	#N/A	0	0	#N/A	#N/A	0	0	#N/A	#N/A	0	0	#N/A	#N/A	0
hsa-miR-3937				0	#N/A	#N/A	#N/A	#N/A	#N/A	0	#N/A	#N/A	0	0	#N/A	#N/A	0	0	#N/A	#N/A	0	0	#N/A	#N/A	0	0	#N/A	#N/A	0	0	#N/A	#N/A	0
hsa-miR-4441				0	#N/A	#N/A	#N/A	#N/A	#N/A	0	#N/A	#N/A	0	0	#N/A	#N/A	0	0	#N/A	#N/A	0	0	#N/A	#N/A	0	0	#N/A	#N/A	0	0	#N/A	#N/A	0
hsa-miR-3918				0	#N/A	#N/A	#N/A	#N/A	#N/A	0	#N/A	#N/A	0	0	#N/A	#N/A	0	0	#N/A	#N/A	0	0	#N/A	#N/A	0	0	#N/A	#N/A	0	0	#N/A	#N/A	0
hsa-miR-9900				0	#N/A	#N/A	#N/A	#N/A	#N/A	0	#N/A	#N/A	0	0	#N/A	#N/A	0	0	#N/A	#N/A	0	0	#N/A	#N/A	0	0	#N/A	#N/A	0	0	#N/A	#N/A	0
hsa-miR-125a-3p				0	#N/A	#N/A	#N/A	#N/A	#N/A	0	#N/A	#N/A	0	0	#N/A	#N/A	0	0	#N/A	#N/A	0	0	#N/A	#N/A	0	0	#N/A	#N/A	0	0	#N/A	#N/A	0
hsa-miR-936				0	#N/A	#N/A	#N/A	#N/A	#N/A	0	#N/A	#N/A	0	0	#N/A	#N/A	0	0	#N/A	#N/A	0	0	#N/A	#N/A	0	0	#N/A	#N/A	0	0	#N/A	#N/A	0
hsa-miR-199a-3p				79.6667	-8.67578	-3.11699	0.142111	0.601882	1	233	#N/A	#N/A	6512.28	4	#N/A	#N/A	2044.33	2	#N/A	#N/A	71.3302	6	#N/A	#N/A	250.678	1	#N/A	#N/A	19.4098	6	#N/A	#N/A	811.572
hsa-miR-622				0	#N/A	#N/A	#N/A	#N/A	#N/A	0	#N/A	#N/A	0	0	#N/A	#N/A	0	0	#N/A	#N/A	0	0	#N/A	#N/A	0	0	#N/A	#N/A	0	0	#N/A	#N/A	0
hsa-miR-1-5p				0	#N/A	#N/A	#N/A	#N/A	#N/A	0	#N/A	#N/A	0	0	#N/A	#N/A	0	0	#N/A	#N/A	0	0	#N/A	#N/A	0	0	#N/A	#N/A	0	0	#N/A	#N/A	0
hsa-miR-4793-5p				0	#N/A	#N/A	#N/A	#N/A	#N/A	0	#N/A	#N/A	0	0	#N/A	#N/A	0	0	#N/A	#N/A	0	0	#N/A	#N/A	0	0	#N/A	#N/A	0	0	#N/A	#N/A	0
hsa-miR-6785-3p				0	#N/A	#N/A	#N/A	#N/A	#N/A	0	#N/A	#N/A	0	0	#N/A	#N/A	0	0	#N/A	#N/A	0	0	#N/A	#N/A	0	0	#N/A	#N/A	0	0	#N/A	#N/A	0
hsa-miR-4317				0	#N/A	#N/A	#N/A	#N/A	#N/A	0	#N/A	#N/A	0	0	#N/A	#N/A	0	0	#N/A	#N/A	0	0	#N/A	#N/A	0	0	#N/A	#N/A	0	0	#N/A	#N/A	0
hsa-miR-1250-3p				0	#N/A	#N/A	#N/A	#N/A	#N/A	0	#N/A	#N/A	0	0	#N/A	#N/A	0	0	#N/A	#N/A	0	0	#N/A	#N/A	0	0	#N/A	#N/A	0	0	#N/A	#N/A	0
hsa-miR-3691-3p				0	#N/A	#N/A	#N/A	#N/A	#N/A	0	#N/A	#N/A	0	0	#N/A	#N/A	0	0	#N/A	#N/A	0	0	#N/A	#N/A	0	0	#N/A	#N/A	0	0	#N/A	#N/A	0
hsa-miR-181a-2-3p				1	-13.891	-3.79607	0.188517	0.636374	1	3	#N/A	#N/A	83.8491	0	#N/A	#N/A	0	0	#N/A	#N/A	0	0	#N/A	#N/A	0	0	#N/A	#N/A	0	0	#N/A	#N/A	0
hsa-miR-6849-3p				0	#N/A	#N/A	#N/A	#N/A	#N/A	0	#N/A	#N/A	0	0	#N/A	#N/A	0	0	#N/A	#N/A	0	0	#N/A	#N/A	0	0	#N/A	#N/A	0	0	#N/A	#N/A	0
hsa-miR-4738-5p				0	#N/A	#N/A	#N/A	#N/A	#N/A	0	#N/A	#N/A	0	0	#N/A	#N/A	0	0	#N/A	#N/A	0	0	#N/A	#N/A	0	0	#N/A	#N/A	0	0	#N/A	#N/A	0
hsa-miR-665				0	#N/A	#N/A	#N/A	#N/A	#N/A	0	#N/A	#N/A	0	0	#N/A	#N/A	0	0	#N/A	#N/A	0	0	#N/A	#N/A	0	0	#N/A	#N/A	0	0	#N/A	#N/A	0
hsa-miR-4645-5p				0	#N/A	#N/A	#N/A	#N/A	#N/A	0	#N/A	#N/A	0	0	#N/A	#N/A	0	0	#N/A	#N/A	0	0	#N/A	#N/A	0	0	#N/A	#N/A	0	0	#N/A	#N/A	0
hsa-miR-6837-5p				0	#N/A	#N/A	#N/A	#N/A	#N/A	0	#N/A	#N/A	0	0	#N/A	#N/A	0	0	#N/A	#N/A	0	0	#N/A	#N/A	0	0	#N/A	#N/A	0	0	#N/A	#N/A	0
hsa-miR-181a-3p				1.33333	-17.9391	-4.16503	0.155938	0.620728	1	3	#N/A	#N/A	83.8491	1	#N/A	#N/A	511.083	0	#N/A	#N/A	0	0	#N/A	#N/A	0	0	#N/A	#N/A	0	0	#N/A	#N/A	0
hsa-miR-4726-3p				0	#N/A	#N/A	#N/A	#N/A	#N/A	0	#N/A	#N/A	0	0	#N/A	#N/A	0	0	#N/A	#N/A	0	0	#N/A	#N/A	0	0	#N/A	#N/A	0	0	#N/A	#N/A	0
hsa-miR-4286				0	#N/A	#N/A	#N/A	#N/A	#N/A	0	#N/A	#N/A	0	0	#N/A	#N/A	0	0	#N/A	#N/A	0	0	#N/A	#N/A	0	0	#N/A	#N/A	0	0	#N/A	#N/A	0
hsa-miR-6840-5p				0	#N/A	#N/A	#N/A	#N/A	#N/A	0	#N/A	#N/A	0	0	#N/A	#N/A	0	0	#N/A	#N/A	0	0	#N/A	#N/A	0	0	#N/A	#N/A	0	0	#N/A	#N/A	0
hsa-miR-6795-3p				0	#N/A	#N/A	#N/A	#N/A	#N/A	0	#N/A	#N/A	0	0	#N/A	#N/A	0	0	#N/A	#N/A	0	0	#N/A	#N/A	0	0	#N/A	#N/A	0	0	#N/A	#N/A	0
hsa-miR-6801-3p				0	#N/A	#N/A	#N/A	#N/A	#N/A	0	#N/A	#N/A	0	0	#N/A	#N/A	0	0	#N/A	#N/A	0	0	#N/A	#N/A	0	0	#N/A	#N/A	0	0	#N/A	#N/A	0
hsa-miR-7108-3p				0	#N/A	#N/A	#N/A	#N/A	#N/A	0	#N/A	#N/A	0	0	#N/A	#N/A	0	0	#N/A	#N/A	0	0	#N/A	#N/A	0	0	#N/A	#N/A	0	0	#N/A	#N/A	0
hsa-miR-1247-5p				0.666667	-9.85383	-3.30068	0.254727	0.651646	1	0	#N/A	#N/A	0	0	#N/A	#N/A	0	2	#N/A	#N/A	71.3302	0	#N/A	#N/A	0	0	#N/A	#N/A	0	0	#N/A	#N/A	0
hsa-miR-454-5p				0	#N/A	#N/A	#N/A	#N/A	#N/A	0	#N/A	#N/A	0	0	#N/A	#N/A	0	0	#N/A	#N/A	0	0	#N/A	#N/A	0	0	#N/A	#N/A	0	0	#N/A	#N/A	0
hsa-miR-4655-3p				0	#N/A	#N/A	#N/A	#N/A	#N/A	0	#N/A	#N/A	0	0	#N/A	#N/A	0	0	#N/A	#N/A	0	0	#N/A	#N/A	0	0	#N/A	#N/A	0	0	#N/A	#N/A	0
hsa-miR-4780				0	#N/A	#N/A	#N/A	#N/A	#N/A	0	#N/A	#N/A	0	0	#N/A	#N/A	0	0	#N/A	#N/A	0	0	#N/A	#N/A	0	0	#N/A	#N/A	0	0	#N/A	#N/A	0
hsa-miR-6832-3p				0	#N/A	#N/A	#N/A	#N/A	#N/A	0	#N/A	#N/A	0	0	#N/A	#N/A	0	0	#N/A	#N/A	0	0	#N/A	#N/A	0	0	#N/A	#N/A	0	0	#N/A	#N/A	0
hsa-miR-4671-5p				0	#N/A	#N/A	#N/A	#N/A	#N/A	0	#N/A	#N/A	0	0	#N/A	#N/A	0	0	#N/A	#N/A	0	0	#N/A	#N/A	0	0	#N/A	#N/A	0	0	#N/A	#N/A	0
hsa-miR-4485-5p				0	#N/A	#N/A	#N/A	#N/A	#N/A	0	#N/A	#N/A	0	0	#N/A	#N/A	0	0	#N/A	#N/A	0	0	#N/A	#N/A	0	0	#N/A	#N/A	0	0	#N/A	#N/A	0
hsa-miR-6827-3p				0	#N/A	#N/A	#N/A	#N/A	#N/A	0	#N/A	#N/A	0	0	#N/A	#N/A	0	0	#N/A	#N/A	0	0	#N/A	#N/A	0	0	#N/A	#N/A	0	0	#N/A	#N/A	0
hsa-miR-1973				0	#N/A	#N/A	#N/A	#N/A	#N/A	0	#N/A	#N/A	0	0	#N/A	#N/A	0	0	#N/A	#N/A	0	0	#N/A	#N/A	0	0	#N/A	#N/A	0	0	#N/A	#N/A	0
hsa-miR-132-5p				1.33333	-1.96279	-0.972903	0.630914	0.956332	1	4	#N/A	#N/A	111.799	0	#N/A	#N/A	0	0	#N/A	#N/A	0	2	#N/A	#N/A	83.5592	0	#N/A	#N/A	0	0	#N/A	#N/A	0
hsa-miR-660-3p				0	#N/A	#N/A	#N/A	#N/A	#N/A	0	#N/A	#N/A	0	0	#N/A	#N/A	0	0	#N/A	#N/A	0	0	#N/A	#N/A	0	0	#N/A	#N/A	0	0	#N/A	#N/A	0
hsa-miR-10401-3p				0	#N/A	#N/A	#N/A	#N/A	#N/A	0	#N/A	#N/A	0	0	#N/A	#N/A	0	0	#N/A	#N/A	0	0	#N/A	#N/A	0	0	#N/A	#N/A	0	0	#N/A	#N/A	0
hsa-miR-3140-5p				0	#N/A	#N/A	#N/A	#N/A	#N/A	0	#N/A	#N/A	0	0	#N/A	#N/A	0	0	#N/A	#N/A	0	0	#N/A	#N/A	0	0	#N/A	#N/A	0	0	#N/A	#N/A	0
hsa-miR-544b				0	#N/A	#N/A	#N/A	#N/A	#N/A	0	#N/A	#N/A	0	0	#N/A	#N/A	0	0	#N/A	#N/A	0	0	#N/A	#N/A	0	0	#N/A	#N/A	0	0	#N/A	#N/A	0
hsa-miR-4722-3p				0	#N/A	#N/A	#N/A	#N/A	#N/A	0	#N/A	#N/A	0	0	#N/A	#N/A	0	0	#N/A	#N/A	0	0	#N/A	#N/A	0	0	#N/A	#N/A	0	0	#N/A	#N/A	0
hsa-miR-3690				0	#N/A	#N/A	#N/A	#N/A	#N/A	0	#N/A	#N/A	0	0	#N/A	#N/A	0	0	#N/A	#N/A	0	0	#N/A	#N/A	0	0	#N/A	#N/A	0	0	#N/A	#N/A	0
hsa-miR-8073				0	#N/A	#N/A	#N/A	#N/A	#N/A	0	#N/A	#N/A	0	0	#N/A	#N/A	0	0	#N/A	#N/A	0	0	#N/A	#N/A	0	0	#N/A	#N/A	0	0	#N/A	#N/A	0
hsa-miR-221-5p				0	#N/A	#N/A	#N/A	#N/A	#N/A	0	#N/A	#N/A	0	0	#N/A	#N/A	0	0	#N/A	#N/A	0	0	#N/A	#N/A	0	0	#N/A	#N/A	0	0	#N/A	#N/A	0
hsa-miR-6742-3p				0	#N/A	#N/A	#N/A	#N/A	#N/A	0	#N/A	#N/A	0	0	#N/A	#N/A	0	0	#N/A	#N/A	0	0	#N/A	#N/A	0	0	#N/A	#N/A	0	0	#N/A	#N/A	0
hsa-miR-4421				0	#N/A	#N/A	#N/A	#N/A	#N/A	0	#N/A	#N/A	0	0	#N/A	#N/A	0	0	#N/A	#N/A	0	0	#N/A	#N/A	0	0	#N/A	#N/A	0	0	#N/A	#N/A	0
hsa-miR-3667-3p				0	#N/A	#N/A	#N/A	#N/A	#N/A	0	#N/A	#N/A	0	0	#N/A	#N/A	0	0	#N/A	#N/A	0	0	#N/A	#N/A	0	0	#N/A	#N/A	0	0	#N/A	#N/A	0
hsa-miR-1248				0	#N/A	#N/A	#N/A	#N/A	#N/A	0	#N/A	#N/A	0	0	#N/A	#N/A	0	0	#N/A	#N/A	0	0	#N/A	#N/A	0	0	#N/A	#N/A	0	0	#N/A	#N/A	0
hsa-miR-6841-3p				0	#N/A	#N/A	#N/A	#N/A	#N/A	0	#N/A	#N/A	0	0	#N/A	#N/A	0	0	#N/A	#N/A	0	0	#N/A	#N/A	0	0	#N/A	#N/A	0	0	#N/A	#N/A	0
hsa-miR-1915-5p				0	#N/A	#N/A	#N/A	#N/A	#N/A	0	#N/A	#N/A	0	0	#N/A	#N/A	0	0	#N/A	#N/A	0	0	#N/A	#N/A	0	0	#N/A	#N/A	0	0	#N/A	#N/A	0
hsa-miR-212-5p				0	#N/A	#N/A	#N/A	#N/A	#N/A	0	#N/A	#N/A	0	0	#N/A	#N/A	0	0	#N/A	#N/A	0	0	#N/A	#N/A	0	0	#N/A	#N/A	0	0	#N/A	#N/A	0
hsa-miR-1249-3p				0	#N/A	#N/A	#N/A	#N/A	#N/A	0	#N/A	#N/A	0	0	#N/A	#N/A	0	0	#N/A	#N/A	0	0	#N/A	#N/A	0	0	#N/A	#N/A	0	0	#N/A	#N/A	0
hsa-miR-5091				0	#N/A	#N/A	#N/A	#N/A	#N/A	0	#N/A	#N/A	0	0	#N/A	#N/A	0	0	#N/A	#N/A	0	0	#N/A	#N/A	0	0	#N/A	#N/A	0	0	#N/A	#N/A	0
hsa-miR-105-3p				0	#N/A	#N/A	#N/A	#N/A	#N/A	0	#N/A	#N/A	0	0	#N/A	#N/A	0	0	#N/A	#N/A	0	0	#N/A	#N/A	0	0	#N/A	#N/A	0	0	#N/A	#N/A	0
hsa-miR-6075				0	#N/A	#N/A	#N/A	#N/A	#N/A	0	#N/A	#N/A	0	0	#N/A	#N/A	0	0	#N/A	#N/A	0	0	#N/A	#N/A	0	0	#N/A	#N/A	0	0	#N/A	#N/A	0
hsa-miR-7112-5p				0	#N/A	#N/A	#N/A	#N/A	#N/A	0	#N/A	#N/A	0	0	#N/A	#N/A	0	0	#N/A	#N/A	0	0	#N/A	#N/A	0	0	#N/A	#N/A	0	0	#N/A	#N/A	0
hsa-miR-6777-5p				0	#N/A	#N/A	#N/A	#N/A	#N/A	0	#N/A	#N/A	0	0	#N/A	#N/A	0	0	#N/A	#N/A	0	0	#N/A	#N/A	0	0	#N/A	#N/A	0	0	#N/A	#N/A	0
hsa-miR-137-5p				0	#N/A	#N/A	#N/A	#N/A	#N/A	0	#N/A	#N/A	0	0	#N/A	#N/A	0	0	#N/A	#N/A	0	0	#N/A	#N/A	0	0	#N/A	#N/A	0	0	#N/A	#N/A	0
hsa-miR-125b-1-3p				0.333333	-5.81155	-2.53892	0.373246	#N/A	1	1	#N/A	#N/A	27.9497	0	#N/A	#N/A	0	0	#N/A	#N/A	0	0	#N/A	#N/A	0	0	#N/A	#N/A	0	0	#N/A	#N/A	0
hsa-miR-1250-5p				0	#N/A	#N/A	#N/A	#N/A	#N/A	0	#N/A	#N/A	0	0	#N/A	#N/A	0	0	#N/A	#N/A	0	0	#N/A	#N/A	0	0	#N/A	#N/A	0	0	#N/A	#N/A	0
hsa-miR-1306-3p				0	#N/A	#N/A	#N/A	#N/A	#N/A	0	#N/A	#N/A	0	0	#N/A	#N/A	0	0	#N/A	#N/A	0	0	#N/A	#N/A	0	0	#N/A	#N/A	0	0	#N/A	#N/A	0
hsa-miR-5707				0	#N/A	#N/A	#N/A	#N/A	#N/A	0	#N/A	#N/A	0	0	#N/A	#N/A	0	0	#N/A	#N/A	0	0	#N/A	#N/A	0	0	#N/A	#N/A	0	0	#N/A	#N/A	0
hsa-miR-4509				0	#N/A	#N/A	#N/A	#N/A	#N/A	0	#N/A	#N/A	0	0	#N/A	#N/A	0	0	#N/A	#N/A	0	0	#N/A	#N/A	0	0	#N/A	#N/A	0	0	#N/A	#N/A	0
hsa-miR-190b-3p				0	#N/A	#N/A	#N/A	#N/A	#N/A	0	#N/A	#N/A	0	0	#N/A	#N/A	0	0	#N/A	#N/A	0	0	#N/A	#N/A	0	0	#N/A	#N/A	0	0	#N/A	#N/A	0
hsa-miR-616-5p				0	#N/A	#N/A	#N/A	#N/A	#N/A	0	#N/A	#N/A	0	0	#N/A	#N/A	0	0	#N/A	#N/A	0	0	#N/A	#N/A	0	0	#N/A	#N/A	0	0	#N/A	#N/A	0
hsa-miR-371b-5p				0	#N/A	#N/A	#N/A	#N/A	#N/A	0	#N/A	#N/A	0	0	#N/A	#N/A	0	0	#N/A	#N/A	0	0	#N/A	#N/A	0	0	#N/A	#N/A	0	0	#N/A	#N/A	0
hsa-miR-373-5p				0	#N/A	#N/A	#N/A	#N/A	#N/A	0	#N/A	#N/A	0	0	#N/A	#N/A	0	0	#N/A	#N/A	0	0	#N/A	#N/A	0	0	#N/A	#N/A	0	0	#N/A	#N/A	0
hsa-miR-371a-5p				0	#N/A	#N/A	#N/A	#N/A	#N/A	0	#N/A	#N/A	0	0	#N/A	#N/A	0	0	#N/A	#N/A	0	0	#N/A	#N/A	0	0	#N/A	#N/A	0	0	#N/A	#N/A	0
hsa-miR-4264				0	#N/A	#N/A	#N/A	#N/A	#N/A	0	#N/A	#N/A	0	0	#N/A	#N/A	0	0	#N/A	#N/A	0	0	#N/A	#N/A	0	0	#N/A	#N/A	0	0	#N/A	#N/A	0
hsa-miR-6758-3p				0	#N/A	#N/A	#N/A	#N/A	#N/A	0	#N/A	#N/A	0	0	#N/A	#N/A	0	0	#N/A	#N/A	0	0	#N/A	#N/A	0	0	#N/A	#N/A	0	0	#N/A	#N/A	0
hsa-miR-5695				0	#N/A	#N/A	#N/A	#N/A	#N/A	0	#N/A	#N/A	0	0	#N/A	#N/A	0	0	#N/A	#N/A	0	0	#N/A	#N/A	0	0	#N/A	#N/A	0	0	#N/A	#N/A	0
hsa-miR-766-3p				0	#N/A	#N/A	#N/A	#N/A	#N/A	0	#N/A	#N/A	0	0	#N/A	#N/A	0	0	#N/A	#N/A	0	0	#N/A	#N/A	0	0	#N/A	#N/A	0	0	#N/A	#N/A	0
hsa-miR-3925-3p				0	#N/A	#N/A	#N/A	#N/A	#N/A	0	#N/A	#N/A	0	0	#N/A	#N/A	0	0	#N/A	#N/A	0	0	#N/A	#N/A	0	0	#N/A	#N/A	0	0	#N/A	#N/A	0
hsa-miR-136-5p				0	#N/A	#N/A	#N/A	#N/A	#N/A	0	#N/A	#N/A	0	0	#N/A	#N/A	0	0	#N/A	#N/A	0	0	#N/A	#N/A	0	0	#N/A	#N/A	0	0	#N/A	#N/A	0
hsa-miR-6814-3p				0	#N/A	#N/A	#N/A	#N/A	#N/A	0	#N/A	#N/A	0	0	#N/A	#N/A	0	0	#N/A	#N/A	0	0	#N/A	#N/A	0	0	#N/A	#N/A	0	0	#N/A	#N/A	0
hsa-miR-1307-3p				0.333333	-5.81223	-2.53909	0.373209	#N/A	1	0	#N/A	#N/A	0	0	#N/A	#N/A	0	1	#N/A	#N/A	35.6651	0	#N/A	#N/A	0	0	#N/A	#N/A	0	0	#N/A	#N/A	0
hsa-miR-4638-5p				0	#N/A	#N/A	#N/A	#N/A	#N/A	0	#N/A	#N/A	0	0	#N/A	#N/A	0	0	#N/A	#N/A	0	0	#N/A	#N/A	0	0	#N/A	#N/A	0	0	#N/A	#N/A	0
hsa-miR-1251-5p				0	#N/A	#N/A	#N/A	#N/A	#N/A	0	#N/A	#N/A	0	0	#N/A	#N/A	0	0	#N/A	#N/A	0	0	#N/A	#N/A	0	0	#N/A	#N/A	0	0	#N/A	#N/A	0
hsa-miR-130b-5p				16.3333	101.714	6.66838	0.0590224	0.369532	1	0	#N/A	#N/A	0	0	#N/A	#N/A	0	0	#N/A	#N/A	0	49	#N/A	#N/A	2047.2	0	#N/A	#N/A	0	0	#N/A	#N/A	0
hsa-miR-5187-3p				0	#N/A	#N/A	#N/A	#N/A	#N/A	0	#N/A	#N/A	0	0	#N/A	#N/A	0	0	#N/A	#N/A	0	0	#N/A	#N/A	0	0	#N/A	#N/A	0	0	#N/A	#N/A	0
hsa-miR-3660				0	#N/A	#N/A	#N/A	#N/A	#N/A	0	#N/A	#N/A	0	0	#N/A	#N/A	0	0	#N/A	#N/A	0	0	#N/A	#N/A	0	0	#N/A	#N/A	0	0	#N/A	#N/A	0
hsa-miR-6751-3p				0	#N/A	#N/A	#N/A	#N/A	#N/A	0	#N/A	#N/A	0	0	#N/A	#N/A	0	0	#N/A	#N/A	0	0	#N/A	#N/A	0	0	#N/A	#N/A	0	0	#N/A	#N/A	0
hsa-miR-3920				0	#N/A	#N/A	#N/A	#N/A	#N/A	0	#N/A	#N/A	0	0	#N/A	#N/A	0	0	#N/A	#N/A	0	0	#N/A	#N/A	0	0	#N/A	#N/A	0	0	#N/A	#N/A	0
hsa-miR-29a-5p				0	#N/A	#N/A	#N/A	#N/A	#N/A	0	#N/A	#N/A	0	0	#N/A	#N/A	0	0	#N/A	#N/A	0	0	#N/A	#N/A	0	0	#N/A	#N/A	0	0	#N/A	#N/A	0
hsa-miR-17-3p				0	#N/A	#N/A	#N/A	#N/A	#N/A	0	#N/A	#N/A	0	0	#N/A	#N/A	0	0	#N/A	#N/A	0	0	#N/A	#N/A	0	0	#N/A	#N/A	0	0	#N/A	#N/A	0
hsa-miR-20a-3p				0	#N/A	#N/A	#N/A	#N/A	#N/A	0	#N/A	#N/A	0	0	#N/A	#N/A	0	0	#N/A	#N/A	0	0	#N/A	#N/A	0	0	#N/A	#N/A	0	0	#N/A	#N/A	0
hsa-miR-18a-3p				0	#N/A	#N/A	#N/A	#N/A	#N/A	0	#N/A	#N/A	0	0	#N/A	#N/A	0	0	#N/A	#N/A	0	0	#N/A	#N/A	0	0	#N/A	#N/A	0	0	#N/A	#N/A	0
hsa-miR-93-3p				0	#N/A	#N/A	#N/A	#N/A	#N/A	0	#N/A	#N/A	0	0	#N/A	#N/A	0	0	#N/A	#N/A	0	0	#N/A	#N/A	0	0	#N/A	#N/A	0	0	#N/A	#N/A	0
hsa-miR-6128				0	#N/A	#N/A	#N/A	#N/A	#N/A	0	#N/A	#N/A	0	0	#N/A	#N/A	0	0	#N/A	#N/A	0	0	#N/A	#N/A	0	0	#N/A	#N/A	0	0	#N/A	#N/A	0
hsa-miR-378i				0	#N/A	#N/A	#N/A	#N/A	#N/A	0	#N/A	#N/A	0	0	#N/A	#N/A	0	0	#N/A	#N/A	0	0	#N/A	#N/A	0	0	#N/A	#N/A	0	0	#N/A	#N/A	0
hsa-miR-422a				0	#N/A	#N/A	#N/A	#N/A	#N/A	0	#N/A	#N/A	0	0	#N/A	#N/A	0	0	#N/A	#N/A	0	0	#N/A	#N/A	0	0	#N/A	#N/A	0	0	#N/A	#N/A	0
hsa-miR-378f				0	#N/A	#N/A	#N/A	#N/A	#N/A	0	#N/A	#N/A	0	0	#N/A	#N/A	0	0	#N/A	#N/A	0	0	#N/A	#N/A	0	0	#N/A	#N/A	0	0	#N/A	#N/A	0
hsa-miR-378b				0	#N/A	#N/A	#N/A	#N/A	#N/A	0	#N/A	#N/A	0	0	#N/A	#N/A	0	0	#N/A	#N/A	0	0	#N/A	#N/A	0	0	#N/A	#N/A	0	0	#N/A	#N/A	0
hsa-miR-378d				0	#N/A	#N/A	#N/A	#N/A	#N/A	0	#N/A	#N/A	0	0	#N/A	#N/A	0	0	#N/A	#N/A	0	0	#N/A	#N/A	0	0	#N/A	#N/A	0	0	#N/A	#N/A	0
hsa-miR-378c				0	#N/A	#N/A	#N/A	#N/A	#N/A	0	#N/A	#N/A	0	0	#N/A	#N/A	0	0	#N/A	#N/A	0	0	#N/A	#N/A	0	0	#N/A	#N/A	0	0	#N/A	#N/A	0
hsa-miR-378a-3p				0.666667	1.27684	0.352576	0.84762	0.96669	1	1	#N/A	#N/A	27.9497	0	#N/A	#N/A	0	0	#N/A	#N/A	0	1	#N/A	#N/A	41.7796	0	#N/A	#N/A	0	1	#N/A	#N/A	135.262
hsa-miR-378e				0	#N/A	#N/A	#N/A	#N/A	#N/A	0	#N/A	#N/A	0	0	#N/A	#N/A	0	0	#N/A	#N/A	0	0	#N/A	#N/A	0	0	#N/A	#N/A	0	0	#N/A	#N/A	0
hsa-miR-378h				0	#N/A	#N/A	#N/A	#N/A	#N/A	0	#N/A	#N/A	0	0	#N/A	#N/A	0	0	#N/A	#N/A	0	0	#N/A	#N/A	0	0	#N/A	#N/A	0	0	#N/A	#N/A	0
hsa-miR-378j				0	#N/A	#N/A	#N/A	#N/A	#N/A	0	#N/A	#N/A	0	0	#N/A	#N/A	0	0	#N/A	#N/A	0	0	#N/A	#N/A	0	0	#N/A	#N/A	0	0	#N/A	#N/A	0
hsa-miR-6868-5p				0	#N/A	#N/A	#N/A	#N/A	#N/A	0	#N/A	#N/A	0	0	#N/A	#N/A	0	0	#N/A	#N/A	0	0	#N/A	#N/A	0	0	#N/A	#N/A	0	0	#N/A	#N/A	0
hsa-miR-4799-3p				0	#N/A	#N/A	#N/A	#N/A	#N/A	0	#N/A	#N/A	0	0	#N/A	#N/A	0	0	#N/A	#N/A	0	0	#N/A	#N/A	0	0	#N/A	#N/A	0	0	#N/A	#N/A	0
hsa-miR-5588-5p				0	#N/A	#N/A	#N/A	#N/A	#N/A	0	#N/A	#N/A	0	0	#N/A	#N/A	0	0	#N/A	#N/A	0	0	#N/A	#N/A	0	0	#N/A	#N/A	0	0	#N/A	#N/A	0
hsa-miR-3176				0	#N/A	#N/A	#N/A	#N/A	#N/A	0	#N/A	#N/A	0	0	#N/A	#N/A	0	0	#N/A	#N/A	0	0	#N/A	#N/A	0	0	#N/A	#N/A	0	0	#N/A	#N/A	0
hsa-miR-664a-5p				0	#N/A	#N/A	#N/A	#N/A	#N/A	0	#N/A	#N/A	0	0	#N/A	#N/A	0	0	#N/A	#N/A	0	0	#N/A	#N/A	0	0	#N/A	#N/A	0	0	#N/A	#N/A	0
hsa-miR-4646-5p				0	#N/A	#N/A	#N/A	#N/A	#N/A	0	#N/A	#N/A	0	0	#N/A	#N/A	0	0	#N/A	#N/A	0	0	#N/A	#N/A	0	0	#N/A	#N/A	0	0	#N/A	#N/A	0
hsa-miR-6506-5p				0	#N/A	#N/A	#N/A	#N/A	#N/A	0	#N/A	#N/A	0	0	#N/A	#N/A	0	0	#N/A	#N/A	0	0	#N/A	#N/A	0	0	#N/A	#N/A	0	0	#N/A	#N/A	0
hsa-miR-6860				0	#N/A	#N/A	#N/A	#N/A	#N/A	0	#N/A	#N/A	0	0	#N/A	#N/A	0	0	#N/A	#N/A	0	0	#N/A	#N/A	0	0	#N/A	#N/A	0	0	#N/A	#N/A	0
hsa-miR-378g				0	#N/A	#N/A	#N/A	#N/A	#N/A	0	#N/A	#N/A	0	0	#N/A	#N/A	0	0	#N/A	#N/A	0	0	#N/A	#N/A	0	0	#N/A	#N/A	0	0	#N/A	#N/A	0
hsa-miR-4667-5p				0	#N/A	#N/A	#N/A	#N/A	#N/A	0	#N/A	#N/A	0	0	#N/A	#N/A	0	0	#N/A	#N/A	0	0	#N/A	#N/A	0	0	#N/A	#N/A	0	0	#N/A	#N/A	0
hsa-miR-637				0	#N/A	#N/A	#N/A	#N/A	#N/A	0	#N/A	#N/A	0	0	#N/A	#N/A	0	0	#N/A	#N/A	0	0	#N/A	#N/A	0	0	#N/A	#N/A	0	0	#N/A	#N/A	0
hsa-miR-6861-5p				0	#N/A	#N/A	#N/A	#N/A	#N/A	0	#N/A	#N/A	0	0	#N/A	#N/A	0	0	#N/A	#N/A	0	0	#N/A	#N/A	0	0	#N/A	#N/A	0	0	#N/A	#N/A	0
hsa-miR-20b-3p				0	#N/A	#N/A	#N/A	#N/A	#N/A	0	#N/A	#N/A	0	0	#N/A	#N/A	0	0	#N/A	#N/A	0	0	#N/A	#N/A	0	0	#N/A	#N/A	0	0	#N/A	#N/A	0
hsa-miR-6773-3p				0	#N/A	#N/A	#N/A	#N/A	#N/A	0	#N/A	#N/A	0	0	#N/A	#N/A	0	0	#N/A	#N/A	0	0	#N/A	#N/A	0	0	#N/A	#N/A	0	0	#N/A	#N/A	0
hsa-miR-367-5p				0	#N/A	#N/A	#N/A	#N/A	#N/A	0	#N/A	#N/A	0	0	#N/A	#N/A	0	0	#N/A	#N/A	0	0	#N/A	#N/A	0	0	#N/A	#N/A	0	0	#N/A	#N/A	0
hsa-miR-302a-5p				0	#N/A	#N/A	#N/A	#N/A	#N/A	0	#N/A	#N/A	0	0	#N/A	#N/A	0	0	#N/A	#N/A	0	0	#N/A	#N/A	0	0	#N/A	#N/A	0	0	#N/A	#N/A	0
hsa-miR-600				0	#N/A	#N/A	#N/A	#N/A	#N/A	0	#N/A	#N/A	0	0	#N/A	#N/A	0	0	#N/A	#N/A	0	0	#N/A	#N/A	0	0	#N/A	#N/A	0	0	#N/A	#N/A	0
hsa-miR-412-3p				0	#N/A	#N/A	#N/A	#N/A	#N/A	0	#N/A	#N/A	0	0	#N/A	#N/A	0	0	#N/A	#N/A	0	0	#N/A	#N/A	0	0	#N/A	#N/A	0	0	#N/A	#N/A	0
hsa-miR-635				0	#N/A	#N/A	#N/A	#N/A	#N/A	0	#N/A	#N/A	0	0	#N/A	#N/A	0	0	#N/A	#N/A	0	0	#N/A	#N/A	0	0	#N/A	#N/A	0	0	#N/A	#N/A	0
hsa-miR-6774-5p				0	#N/A	#N/A	#N/A	#N/A	#N/A	0	#N/A	#N/A	0	0	#N/A	#N/A	0	0	#N/A	#N/A	0	0	#N/A	#N/A	0	0	#N/A	#N/A	0	0	#N/A	#N/A	0
hsa-miR-643				0	#N/A	#N/A	#N/A	#N/A	#N/A	0	#N/A	#N/A	0	0	#N/A	#N/A	0	0	#N/A	#N/A	0	0	#N/A	#N/A	0	0	#N/A	#N/A	0	0	#N/A	#N/A	0
hsa-miR-302b-5p				0	#N/A	#N/A	#N/A	#N/A	#N/A	0	#N/A	#N/A	0	0	#N/A	#N/A	0	0	#N/A	#N/A	0	0	#N/A	#N/A	0	0	#N/A	#N/A	0	0	#N/A	#N/A	0
hsa-miR-302d-5p				0	#N/A	#N/A	#N/A	#N/A	#N/A	0	#N/A	#N/A	0	0	#N/A	#N/A	0	0	#N/A	#N/A	0	0	#N/A	#N/A	0	0	#N/A	#N/A	0	0	#N/A	#N/A	0
hsa-miR-3124-3p				0	#N/A	#N/A	#N/A	#N/A	#N/A	0	#N/A	#N/A	0	0	#N/A	#N/A	0	0	#N/A	#N/A	0	0	#N/A	#N/A	0	0	#N/A	#N/A	0	0	#N/A	#N/A	0
hsa-miR-5681a				0	#N/A	#N/A	#N/A	#N/A	#N/A	0	#N/A	#N/A	0	0	#N/A	#N/A	0	0	#N/A	#N/A	0	0	#N/A	#N/A	0	0	#N/A	#N/A	0	0	#N/A	#N/A	0
hsa-miR-6730-5p				0	#N/A	#N/A	#N/A	#N/A	#N/A	0	#N/A	#N/A	0	0	#N/A	#N/A	0	0	#N/A	#N/A	0	0	#N/A	#N/A	0	0	#N/A	#N/A	0	0	#N/A	#N/A	0
hsa-miR-4680-5p				0	#N/A	#N/A	#N/A	#N/A	#N/A	0	#N/A	#N/A	0	0	#N/A	#N/A	0	0	#N/A	#N/A	0	0	#N/A	#N/A	0	0	#N/A	#N/A	0	0	#N/A	#N/A	0
hsa-miR-3185				0	#N/A	#N/A	#N/A	#N/A	#N/A	0	#N/A	#N/A	0	0	#N/A	#N/A	0	0	#N/A	#N/A	0	0	#N/A	#N/A	0	0	#N/A	#N/A	0	0	#N/A	#N/A	0
hsa-miR-10522-5p				0	#N/A	#N/A	#N/A	#N/A	#N/A	0	#N/A	#N/A	0	0	#N/A	#N/A	0	0	#N/A	#N/A	0	0	#N/A	#N/A	0	0	#N/A	#N/A	0	0	#N/A	#N/A	0
hsa-miR-4699-5p				0	#N/A	#N/A	#N/A	#N/A	#N/A	0	#N/A	#N/A	0	0	#N/A	#N/A	0	0	#N/A	#N/A	0	0	#N/A	#N/A	0	0	#N/A	#N/A	0	0	#N/A	#N/A	0
hsa-miR-1252-5p				0	#N/A	#N/A	#N/A	#N/A	#N/A	0	#N/A	#N/A	0	0	#N/A	#N/A	0	0	#N/A	#N/A	0	0	#N/A	#N/A	0	0	#N/A	#N/A	0	0	#N/A	#N/A	0
hsa-miR-605-3p				0	#N/A	#N/A	#N/A	#N/A	#N/A	0	#N/A	#N/A	0	0	#N/A	#N/A	0	0	#N/A	#N/A	0	0	#N/A	#N/A	0	0	#N/A	#N/A	0	0	#N/A	#N/A	0
hsa-miR-4493				0	#N/A	#N/A	#N/A	#N/A	#N/A	0	#N/A	#N/A	0	0	#N/A	#N/A	0	0	#N/A	#N/A	0	0	#N/A	#N/A	0	0	#N/A	#N/A	0	0	#N/A	#N/A	0
hsa-miR-7515				0	#N/A	#N/A	#N/A	#N/A	#N/A	0	#N/A	#N/A	0	0	#N/A	#N/A	0	0	#N/A	#N/A	0	0	#N/A	#N/A	0	0	#N/A	#N/A	0	0	#N/A	#N/A	0
hsa-miR-3179				0	#N/A	#N/A	#N/A	#N/A	#N/A	0	#N/A	#N/A	0	0	#N/A	#N/A	0	0	#N/A	#N/A	0	0	#N/A	#N/A	0	0	#N/A	#N/A	0	0	#N/A	#N/A	0
hsa-miR-548ao-5p				0	#N/A	#N/A	#N/A	#N/A	#N/A	0	#N/A	#N/A	0	0	#N/A	#N/A	0	0	#N/A	#N/A	0	0	#N/A	#N/A	0	0	#N/A	#N/A	0	0	#N/A	#N/A	0
hsa-miR-548ax				0	#N/A	#N/A	#N/A	#N/A	#N/A	0	#N/A	#N/A	0	0	#N/A	#N/A	0	0	#N/A	#N/A	0	0	#N/A	#N/A	0	0	#N/A	#N/A	0	0	#N/A	#N/A	0
hsa-miR-4795-5p				0	#N/A	#N/A	#N/A	#N/A	#N/A	0	#N/A	#N/A	0	0	#N/A	#N/A	0	0	#N/A	#N/A	0	0	#N/A	#N/A	0	0	#N/A	#N/A	0	0	#N/A	#N/A	0
hsa-miR-10393-5p				0	#N/A	#N/A	#N/A	#N/A	#N/A	0	#N/A	#N/A	0	0	#N/A	#N/A	0	0	#N/A	#N/A	0	0	#N/A	#N/A	0	0	#N/A	#N/A	0	0	#N/A	#N/A	0
hsa-miR-219b-3p				0	#N/A	#N/A	#N/A	#N/A	#N/A	0	#N/A	#N/A	0	0	#N/A	#N/A	0	0	#N/A	#N/A	0	0	#N/A	#N/A	0	0	#N/A	#N/A	0	0	#N/A	#N/A	0
hsa-miR-219a-2-3p				0	#N/A	#N/A	#N/A	#N/A	#N/A	0	#N/A	#N/A	0	0	#N/A	#N/A	0	0	#N/A	#N/A	0	0	#N/A	#N/A	0	0	#N/A	#N/A	0	0	#N/A	#N/A	0
hsa-miR-642a-3p				0	#N/A	#N/A	#N/A	#N/A	#N/A	0	#N/A	#N/A	0	0	#N/A	#N/A	0	0	#N/A	#N/A	0	0	#N/A	#N/A	0	0	#N/A	#N/A	0	0	#N/A	#N/A	0
hsa-miR-642b-3p				0	#N/A	#N/A	#N/A	#N/A	#N/A	0	#N/A	#N/A	0	0	#N/A	#N/A	0	0	#N/A	#N/A	0	0	#N/A	#N/A	0	0	#N/A	#N/A	0	0	#N/A	#N/A	0
hsa-miR-3117-5p				0	#N/A	#N/A	#N/A	#N/A	#N/A	0	#N/A	#N/A	0	0	#N/A	#N/A	0	0	#N/A	#N/A	0	0	#N/A	#N/A	0	0	#N/A	#N/A	0	0	#N/A	#N/A	0
hsa-miR-4645-3p				0	#N/A	#N/A	#N/A	#N/A	#N/A	0	#N/A	#N/A	0	0	#N/A	#N/A	0	0	#N/A	#N/A	0	0	#N/A	#N/A	0	0	#N/A	#N/A	0	0	#N/A	#N/A	0
hsa-miR-3913-3p				0	#N/A	#N/A	#N/A	#N/A	#N/A	0	#N/A	#N/A	0	0	#N/A	#N/A	0	0	#N/A	#N/A	0	0	#N/A	#N/A	0	0	#N/A	#N/A	0	0	#N/A	#N/A	0
hsa-miR-591				0	#N/A	#N/A	#N/A	#N/A	#N/A	0	#N/A	#N/A	0	0	#N/A	#N/A	0	0	#N/A	#N/A	0	0	#N/A	#N/A	0	0	#N/A	#N/A	0	0	#N/A	#N/A	0
hsa-miR-4725-5p				0	#N/A	#N/A	#N/A	#N/A	#N/A	0	#N/A	#N/A	0	0	#N/A	#N/A	0	0	#N/A	#N/A	0	0	#N/A	#N/A	0	0	#N/A	#N/A	0	0	#N/A	#N/A	0
hsa-miR-504-5p				0	#N/A	#N/A	#N/A	#N/A	#N/A	0	#N/A	#N/A	0	0	#N/A	#N/A	0	0	#N/A	#N/A	0	0	#N/A	#N/A	0	0	#N/A	#N/A	0	0	#N/A	#N/A	0
hsa-miR-631				0	#N/A	#N/A	#N/A	#N/A	#N/A	0	#N/A	#N/A	0	0	#N/A	#N/A	0	0	#N/A	#N/A	0	0	#N/A	#N/A	0	0	#N/A	#N/A	0	0	#N/A	#N/A	0
hsa-miR-6855-3p				0	#N/A	#N/A	#N/A	#N/A	#N/A	0	#N/A	#N/A	0	0	#N/A	#N/A	0	0	#N/A	#N/A	0	0	#N/A	#N/A	0	0	#N/A	#N/A	0	0	#N/A	#N/A	0
hsa-miR-4513				0	#N/A	#N/A	#N/A	#N/A	#N/A	0	#N/A	#N/A	0	0	#N/A	#N/A	0	0	#N/A	#N/A	0	0	#N/A	#N/A	0	0	#N/A	#N/A	0	0	#N/A	#N/A	0
hsa-miR-617				0	#N/A	#N/A	#N/A	#N/A	#N/A	0	#N/A	#N/A	0	0	#N/A	#N/A	0	0	#N/A	#N/A	0	0	#N/A	#N/A	0	0	#N/A	#N/A	0	0	#N/A	#N/A	0
hsa-miR-1253				0	#N/A	#N/A	#N/A	#N/A	#N/A	0	#N/A	#N/A	0	0	#N/A	#N/A	0	0	#N/A	#N/A	0	0	#N/A	#N/A	0	0	#N/A	#N/A	0	0	#N/A	#N/A	0
hsa-miR-6088				0	#N/A	#N/A	#N/A	#N/A	#N/A	0	#N/A	#N/A	0	0	#N/A	#N/A	0	0	#N/A	#N/A	0	0	#N/A	#N/A	0	0	#N/A	#N/A	0	0	#N/A	#N/A	0
hsa-miR-4708-5p				0	#N/A	#N/A	#N/A	#N/A	#N/A	0	#N/A	#N/A	0	0	#N/A	#N/A	0	0	#N/A	#N/A	0	0	#N/A	#N/A	0	0	#N/A	#N/A	0	0	#N/A	#N/A	0
hsa-miR-5186				0	#N/A	#N/A	#N/A	#N/A	#N/A	0	#N/A	#N/A	0	0	#N/A	#N/A	0	0	#N/A	#N/A	0	0	#N/A	#N/A	0	0	#N/A	#N/A	0	0	#N/A	#N/A	0
hsa-miR-4468				0	#N/A	#N/A	#N/A	#N/A	#N/A	0	#N/A	#N/A	0	0	#N/A	#N/A	0	0	#N/A	#N/A	0	0	#N/A	#N/A	0	0	#N/A	#N/A	0	0	#N/A	#N/A	0
hsa-miR-3670				0	#N/A	#N/A	#N/A	#N/A	#N/A	0	#N/A	#N/A	0	0	#N/A	#N/A	0	0	#N/A	#N/A	0	0	#N/A	#N/A	0	0	#N/A	#N/A	0	0	#N/A	#N/A	0
hsa-miR-3160-3p				0	#N/A	#N/A	#N/A	#N/A	#N/A	0	#N/A	#N/A	0	0	#N/A	#N/A	0	0	#N/A	#N/A	0	0	#N/A	#N/A	0	0	#N/A	#N/A	0	0	#N/A	#N/A	0
hsa-miR-4487				0	#N/A	#N/A	#N/A	#N/A	#N/A	0	#N/A	#N/A	0	0	#N/A	#N/A	0	0	#N/A	#N/A	0	0	#N/A	#N/A	0	0	#N/A	#N/A	0	0	#N/A	#N/A	0
hsa-miR-27b-5p				0	#N/A	#N/A	#N/A	#N/A	#N/A	0	#N/A	#N/A	0	0	#N/A	#N/A	0	0	#N/A	#N/A	0	0	#N/A	#N/A	0	0	#N/A	#N/A	0	0	#N/A	#N/A	0
hsa-miR-4751				0	#N/A	#N/A	#N/A	#N/A	#N/A	0	#N/A	#N/A	0	0	#N/A	#N/A	0	0	#N/A	#N/A	0	0	#N/A	#N/A	0	0	#N/A	#N/A	0	0	#N/A	#N/A	0
hsa-miR-1185-5p				0	#N/A	#N/A	#N/A	#N/A	#N/A	0	#N/A	#N/A	0	0	#N/A	#N/A	0	0	#N/A	#N/A	0	0	#N/A	#N/A	0	0	#N/A	#N/A	0	0	#N/A	#N/A	0
hsa-miR-6884-5p				0	#N/A	#N/A	#N/A	#N/A	#N/A	0	#N/A	#N/A	0	0	#N/A	#N/A	0	0	#N/A	#N/A	0	0	#N/A	#N/A	0	0	#N/A	#N/A	0	0	#N/A	#N/A	0
hsa-miR-485-5p				104	-1.26032	-0.333791	0.84572	0.96669	1	112	#N/A	#N/A	3130.37	0	#N/A	#N/A	0	172	#N/A	#N/A	6134.4	64	#N/A	#N/A	2673.89	248	#N/A	#N/A	4813.64	0	#N/A	#N/A	0
hsa-miR-3188				0	#N/A	#N/A	#N/A	#N/A	#N/A	0	#N/A	#N/A	0	0	#N/A	#N/A	0	0	#N/A	#N/A	0	0	#N/A	#N/A	0	0	#N/A	#N/A	0	0	#N/A	#N/A	0
hsa-miR-4458				0	#N/A	#N/A	#N/A	#N/A	#N/A	0	#N/A	#N/A	0	0	#N/A	#N/A	0	0	#N/A	#N/A	0	0	#N/A	#N/A	0	0	#N/A	#N/A	0	0	#N/A	#N/A	0
hsa-let-7d-5p				527	-41.5032	-5.37515	0.00882441	0.343683	1	950	#N/A	#N/A	26552.2	1	#N/A	#N/A	511.083	630	#N/A	#N/A	22469	17	#N/A	#N/A	710.253	5	#N/A	#N/A	97.0491	3	#N/A	#N/A	405.786
hsa-miR-202-3p				0	#N/A	#N/A	#N/A	#N/A	#N/A	0	#N/A	#N/A	0	0	#N/A	#N/A	0	0	#N/A	#N/A	0	0	#N/A	#N/A	0	0	#N/A	#N/A	0	0	#N/A	#N/A	0
hsa-miR-655-5p				0	#N/A	#N/A	#N/A	#N/A	#N/A	0	#N/A	#N/A	0	0	#N/A	#N/A	0	0	#N/A	#N/A	0	0	#N/A	#N/A	0	0	#N/A	#N/A	0	0	#N/A	#N/A	0
hsa-miR-377-5p				0	#N/A	#N/A	#N/A	#N/A	#N/A	0	#N/A	#N/A	0	0	#N/A	#N/A	0	0	#N/A	#N/A	0	0	#N/A	#N/A	0	0	#N/A	#N/A	0	0	#N/A	#N/A	0
hsa-miR-4785				0	#N/A	#N/A	#N/A	#N/A	#N/A	0	#N/A	#N/A	0	0	#N/A	#N/A	0	0	#N/A	#N/A	0	0	#N/A	#N/A	0	0	#N/A	#N/A	0	0	#N/A	#N/A	0
hsa-miR-924				0	#N/A	#N/A	#N/A	#N/A	#N/A	0	#N/A	#N/A	0	0	#N/A	#N/A	0	0	#N/A	#N/A	0	0	#N/A	#N/A	0	0	#N/A	#N/A	0	0	#N/A	#N/A	0
hsa-miR-4424				0	#N/A	#N/A	#N/A	#N/A	#N/A	0	#N/A	#N/A	0	0	#N/A	#N/A	0	0	#N/A	#N/A	0	0	#N/A	#N/A	0	0	#N/A	#N/A	0	0	#N/A	#N/A	0
hsa-miR-219a-1-3p				0	#N/A	#N/A	#N/A	#N/A	#N/A	0	#N/A	#N/A	0	0	#N/A	#N/A	0	0	#N/A	#N/A	0	0	#N/A	#N/A	0	0	#N/A	#N/A	0	0	#N/A	#N/A	0
hsa-miR-3145-3p				0	#N/A	#N/A	#N/A	#N/A	#N/A	0	#N/A	#N/A	0	0	#N/A	#N/A	0	0	#N/A	#N/A	0	0	#N/A	#N/A	0	0	#N/A	#N/A	0	0	#N/A	#N/A	0
hsa-miR-383-5p				0	#N/A	#N/A	#N/A	#N/A	#N/A	0	#N/A	#N/A	0	0	#N/A	#N/A	0	0	#N/A	#N/A	0	0	#N/A	#N/A	0	0	#N/A	#N/A	0	0	#N/A	#N/A	0
hsa-miR-369-5p				0.666667	-9.85151	-3.30035	0.240799	0.651646	1	2	#N/A	#N/A	55.8994	0	#N/A	#N/A	0	0	#N/A	#N/A	0	0	#N/A	#N/A	0	0	#N/A	#N/A	0	0	#N/A	#N/A	0
hsa-miR-3171				0	#N/A	#N/A	#N/A	#N/A	#N/A	0	#N/A	#N/A	0	0	#N/A	#N/A	0	0	#N/A	#N/A	0	0	#N/A	#N/A	0	0	#N/A	#N/A	0	0	#N/A	#N/A	0
hsa-miR-219b-5p				0	#N/A	#N/A	#N/A	#N/A	#N/A	0	#N/A	#N/A	0	0	#N/A	#N/A	0	0	#N/A	#N/A	0	0	#N/A	#N/A	0	0	#N/A	#N/A	0	0	#N/A	#N/A	0
hsa-miR-4445-5p				0	#N/A	#N/A	#N/A	#N/A	#N/A	0	#N/A	#N/A	0	0	#N/A	#N/A	0	0	#N/A	#N/A	0	0	#N/A	#N/A	0	0	#N/A	#N/A	0	0	#N/A	#N/A	0
hsa-miR-1468-3p				0	#N/A	#N/A	#N/A	#N/A	#N/A	0	#N/A	#N/A	0	0	#N/A	#N/A	0	0	#N/A	#N/A	0	0	#N/A	#N/A	0	0	#N/A	#N/A	0	0	#N/A	#N/A	0
hsa-miR-4708-3p				0	#N/A	#N/A	#N/A	#N/A	#N/A	0	#N/A	#N/A	0	0	#N/A	#N/A	0	0	#N/A	#N/A	0	0	#N/A	#N/A	0	0	#N/A	#N/A	0	0	#N/A	#N/A	0
hsa-miR-8064				0	#N/A	#N/A	#N/A	#N/A	#N/A	0	#N/A	#N/A	0	0	#N/A	#N/A	0	0	#N/A	#N/A	0	0	#N/A	#N/A	0	0	#N/A	#N/A	0	0	#N/A	#N/A	0
hsa-miR-298				0	#N/A	#N/A	#N/A	#N/A	#N/A	0	#N/A	#N/A	0	0	#N/A	#N/A	0	0	#N/A	#N/A	0	0	#N/A	#N/A	0	0	#N/A	#N/A	0	0	#N/A	#N/A	0
hsa-miR-4771				0	#N/A	#N/A	#N/A	#N/A	#N/A	0	#N/A	#N/A	0	0	#N/A	#N/A	0	0	#N/A	#N/A	0	0	#N/A	#N/A	0	0	#N/A	#N/A	0	0	#N/A	#N/A	0
hsa-miR-2467-3p				0	#N/A	#N/A	#N/A	#N/A	#N/A	0	#N/A	#N/A	0	0	#N/A	#N/A	0	0	#N/A	#N/A	0	0	#N/A	#N/A	0	0	#N/A	#N/A	0	0	#N/A	#N/A	0
hsa-miR-107				0	#N/A	#N/A	#N/A	#N/A	#N/A	0	#N/A	#N/A	0	0	#N/A	#N/A	0	0	#N/A	#N/A	0	0	#N/A	#N/A	0	0	#N/A	#N/A	0	0	#N/A	#N/A	0
hsa-miR-103a-3p				1	-3.30041	-1.72265	0.330654	0.736817	1	3	#N/A	#N/A	83.8491	0	#N/A	#N/A	0	0	#N/A	#N/A	0	1	#N/A	#N/A	41.7796	0	#N/A	#N/A	0	0	#N/A	#N/A	0
hsa-miR-6132				0	#N/A	#N/A	#N/A	#N/A	#N/A	0	#N/A	#N/A	0	0	#N/A	#N/A	0	0	#N/A	#N/A	0	0	#N/A	#N/A	0	0	#N/A	#N/A	0	0	#N/A	#N/A	0
hsa-miR-3665				0	#N/A	#N/A	#N/A	#N/A	#N/A	0	#N/A	#N/A	0	0	#N/A	#N/A	0	0	#N/A	#N/A	0	0	#N/A	#N/A	0	0	#N/A	#N/A	0	0	#N/A	#N/A	0
hsa-miR-6499-3p				0	#N/A	#N/A	#N/A	#N/A	#N/A	0	#N/A	#N/A	0	0	#N/A	#N/A	0	0	#N/A	#N/A	0	0	#N/A	#N/A	0	0	#N/A	#N/A	0	0	#N/A	#N/A	0
hsa-miR-5689				0	#N/A	#N/A	#N/A	#N/A	#N/A	0	#N/A	#N/A	0	0	#N/A	#N/A	0	0	#N/A	#N/A	0	0	#N/A	#N/A	0	0	#N/A	#N/A	0	0	#N/A	#N/A	0
hsa-miR-6076				0	#N/A	#N/A	#N/A	#N/A	#N/A	0	#N/A	#N/A	0	0	#N/A	#N/A	0	0	#N/A	#N/A	0	0	#N/A	#N/A	0	0	#N/A	#N/A	0	0	#N/A	#N/A	0
hsa-miR-4480				0	#N/A	#N/A	#N/A	#N/A	#N/A	0	#N/A	#N/A	0	0	#N/A	#N/A	0	0	#N/A	#N/A	0	0	#N/A	#N/A	0	0	#N/A	#N/A	0	0	#N/A	#N/A	0
hsa-miR-4755-3p				0	#N/A	#N/A	#N/A	#N/A	#N/A	0	#N/A	#N/A	0	0	#N/A	#N/A	0	0	#N/A	#N/A	0	0	#N/A	#N/A	0	0	#N/A	#N/A	0	0	#N/A	#N/A	0
hsa-miR-4313				0	#N/A	#N/A	#N/A	#N/A	#N/A	0	#N/A	#N/A	0	0	#N/A	#N/A	0	0	#N/A	#N/A	0	0	#N/A	#N/A	0	0	#N/A	#N/A	0	0	#N/A	#N/A	0
hsa-miR-210-5p				0	#N/A	#N/A	#N/A	#N/A	#N/A	0	#N/A	#N/A	0	0	#N/A	#N/A	0	0	#N/A	#N/A	0	0	#N/A	#N/A	0	0	#N/A	#N/A	0	0	#N/A	#N/A	0
hsa-miR-4707-3p				0	#N/A	#N/A	#N/A	#N/A	#N/A	0	#N/A	#N/A	0	0	#N/A	#N/A	0	0	#N/A	#N/A	0	0	#N/A	#N/A	0	0	#N/A	#N/A	0	0	#N/A	#N/A	0
hsa-miR-3648				0	#N/A	#N/A	#N/A	#N/A	#N/A	0	#N/A	#N/A	0	0	#N/A	#N/A	0	0	#N/A	#N/A	0	0	#N/A	#N/A	0	0	#N/A	#N/A	0	0	#N/A	#N/A	0
hsa-miR-6743-3p				0	#N/A	#N/A	#N/A	#N/A	#N/A	0	#N/A	#N/A	0	0	#N/A	#N/A	0	0	#N/A	#N/A	0	0	#N/A	#N/A	0	0	#N/A	#N/A	0	0	#N/A	#N/A	0
hsa-miR-6811-3p				0	#N/A	#N/A	#N/A	#N/A	#N/A	0	#N/A	#N/A	0	0	#N/A	#N/A	0	0	#N/A	#N/A	0	0	#N/A	#N/A	0	0	#N/A	#N/A	0	0	#N/A	#N/A	0
hsa-miR-5581-5p				0	#N/A	#N/A	#N/A	#N/A	#N/A	0	#N/A	#N/A	0	0	#N/A	#N/A	0	0	#N/A	#N/A	0	0	#N/A	#N/A	0	0	#N/A	#N/A	0	0	#N/A	#N/A	0
hsa-miR-381-5p				0	#N/A	#N/A	#N/A	#N/A	#N/A	0	#N/A	#N/A	0	0	#N/A	#N/A	0	0	#N/A	#N/A	0	0	#N/A	#N/A	0	0	#N/A	#N/A	0	0	#N/A	#N/A	0
hsa-miR-2277-5p				0	#N/A	#N/A	#N/A	#N/A	#N/A	0	#N/A	#N/A	0	0	#N/A	#N/A	0	0	#N/A	#N/A	0	0	#N/A	#N/A	0	0	#N/A	#N/A	0	0	#N/A	#N/A	0
hsa-miR-4706				0	#N/A	#N/A	#N/A	#N/A	#N/A	0	#N/A	#N/A	0	0	#N/A	#N/A	0	0	#N/A	#N/A	0	0	#N/A	#N/A	0	0	#N/A	#N/A	0	0	#N/A	#N/A	0
hsa-miR-4746-3p				0	#N/A	#N/A	#N/A	#N/A	#N/A	0	#N/A	#N/A	0	0	#N/A	#N/A	0	0	#N/A	#N/A	0	0	#N/A	#N/A	0	0	#N/A	#N/A	0	0	#N/A	#N/A	0
hsa-miR-6853-5p				0	#N/A	#N/A	#N/A	#N/A	#N/A	0	#N/A	#N/A	0	0	#N/A	#N/A	0	0	#N/A	#N/A	0	0	#N/A	#N/A	0	0	#N/A	#N/A	0	0	#N/A	#N/A	0
hsa-miR-548v				0	#N/A	#N/A	#N/A	#N/A	#N/A	0	#N/A	#N/A	0	0	#N/A	#N/A	0	0	#N/A	#N/A	0	0	#N/A	#N/A	0	0	#N/A	#N/A	0	0	#N/A	#N/A	0
hsa-miR-222-3p				1	1.83233	0.873682	0.643748	0.957536	1	2	#N/A	#N/A	55.8994	0	#N/A	#N/A	0	0	#N/A	#N/A	0	1	#N/A	#N/A	41.7796	0	#N/A	#N/A	0	2	#N/A	#N/A	270.524
hsa-miR-221-3p				76	1.36597	0.449929	0.875716	0.96669	1	228	#N/A	#N/A	6372.53	0	#N/A	#N/A	0	0	#N/A	#N/A	0	211	#N/A	#N/A	8815.5	0	#N/A	#N/A	0	0	#N/A	#N/A	0
hsa-miR-549a-5p				0	#N/A	#N/A	#N/A	#N/A	#N/A	0	#N/A	#N/A	0	0	#N/A	#N/A	0	0	#N/A	#N/A	0	0	#N/A	#N/A	0	0	#N/A	#N/A	0	0	#N/A	#N/A	0
hsa-miR-7106-3p				0	#N/A	#N/A	#N/A	#N/A	#N/A	0	#N/A	#N/A	0	0	#N/A	#N/A	0	0	#N/A	#N/A	0	0	#N/A	#N/A	0	0	#N/A	#N/A	0	0	#N/A	#N/A	0
hsa-miR-423-3p				48	-1.27349	-0.348784	0.878741	0.96669	1	131	#N/A	#N/A	3661.41	1	#N/A	#N/A	511.083	12	#N/A	#N/A	427.981	88	#N/A	#N/A	3676.61	0	#N/A	#N/A	0	0	#N/A	#N/A	0
hsa-miR-6502-5p				0	#N/A	#N/A	#N/A	#N/A	#N/A	0	#N/A	#N/A	0	0	#N/A	#N/A	0	0	#N/A	#N/A	0	0	#N/A	#N/A	0	0	#N/A	#N/A	0	0	#N/A	#N/A	0
hsa-miR-3194-3p				0	#N/A	#N/A	#N/A	#N/A	#N/A	0	#N/A	#N/A	0	0	#N/A	#N/A	0	0	#N/A	#N/A	0	0	#N/A	#N/A	0	0	#N/A	#N/A	0	0	#N/A	#N/A	0
hsa-miR-4663				0	#N/A	#N/A	#N/A	#N/A	#N/A	0	#N/A	#N/A	0	0	#N/A	#N/A	0	0	#N/A	#N/A	0	0	#N/A	#N/A	0	0	#N/A	#N/A	0	0	#N/A	#N/A	0
hsa-miR-133a-5p				0	#N/A	#N/A	#N/A	#N/A	#N/A	0	#N/A	#N/A	0	0	#N/A	#N/A	0	0	#N/A	#N/A	0	0	#N/A	#N/A	0	0	#N/A	#N/A	0	0	#N/A	#N/A	0
hsa-miR-138-5p				0.666667	4.64641	2.21612	0.407513	0.775924	1	0	#N/A	#N/A	0	0	#N/A	#N/A	0	0	#N/A	#N/A	0	2	#N/A	#N/A	83.5592	0	#N/A	#N/A	0	0	#N/A	#N/A	0
hsa-miR-1537-5p				0	#N/A	#N/A	#N/A	#N/A	#N/A	0	#N/A	#N/A	0	0	#N/A	#N/A	0	0	#N/A	#N/A	0	0	#N/A	#N/A	0	0	#N/A	#N/A	0	0	#N/A	#N/A	0
hsa-miR-4718				0	#N/A	#N/A	#N/A	#N/A	#N/A	0	#N/A	#N/A	0	0	#N/A	#N/A	0	0	#N/A	#N/A	0	0	#N/A	#N/A	0	0	#N/A	#N/A	0	0	#N/A	#N/A	0
hsa-miR-626				0	#N/A	#N/A	#N/A	#N/A	#N/A	0	#N/A	#N/A	0	0	#N/A	#N/A	0	0	#N/A	#N/A	0	0	#N/A	#N/A	0	0	#N/A	#N/A	0	0	#N/A	#N/A	0
hsa-miR-6876-3p				0	#N/A	#N/A	#N/A	#N/A	#N/A	0	#N/A	#N/A	0	0	#N/A	#N/A	0	0	#N/A	#N/A	0	0	#N/A	#N/A	0	0	#N/A	#N/A	0	0	#N/A	#N/A	0
hsa-miR-2115-5p				0	#N/A	#N/A	#N/A	#N/A	#N/A	0	#N/A	#N/A	0	0	#N/A	#N/A	0	0	#N/A	#N/A	0	0	#N/A	#N/A	0	0	#N/A	#N/A	0	0	#N/A	#N/A	0
hsa-miR-103a-2-5p				0	#N/A	#N/A	#N/A	#N/A	#N/A	0	#N/A	#N/A	0	0	#N/A	#N/A	0	0	#N/A	#N/A	0	0	#N/A	#N/A	0	0	#N/A	#N/A	0	0	#N/A	#N/A	0
hsa-miR-3140-3p				0	#N/A	#N/A	#N/A	#N/A	#N/A	0	#N/A	#N/A	0	0	#N/A	#N/A	0	0	#N/A	#N/A	0	0	#N/A	#N/A	0	0	#N/A	#N/A	0	0	#N/A	#N/A	0
hsa-miR-4261				0	#N/A	#N/A	#N/A	#N/A	#N/A	0	#N/A	#N/A	0	0	#N/A	#N/A	0	0	#N/A	#N/A	0	0	#N/A	#N/A	0	0	#N/A	#N/A	0	0	#N/A	#N/A	0
hsa-miR-5093				0	#N/A	#N/A	#N/A	#N/A	#N/A	0	#N/A	#N/A	0	0	#N/A	#N/A	0	0	#N/A	#N/A	0	0	#N/A	#N/A	0	0	#N/A	#N/A	0	0	#N/A	#N/A	0
hsa-miR-6828-5p				0	#N/A	#N/A	#N/A	#N/A	#N/A	0	#N/A	#N/A	0	0	#N/A	#N/A	0	0	#N/A	#N/A	0	0	#N/A	#N/A	0	0	#N/A	#N/A	0	0	#N/A	#N/A	0
hsa-miR-671-5p				0	#N/A	#N/A	#N/A	#N/A	#N/A	0	#N/A	#N/A	0	0	#N/A	#N/A	0	0	#N/A	#N/A	0	0	#N/A	#N/A	0	0	#N/A	#N/A	0	0	#N/A	#N/A	0
hsa-miR-613				0	#N/A	#N/A	#N/A	#N/A	#N/A	0	#N/A	#N/A	0	0	#N/A	#N/A	0	0	#N/A	#N/A	0	0	#N/A	#N/A	0	0	#N/A	#N/A	0	0	#N/A	#N/A	0
hsa-miR-492				0	#N/A	#N/A	#N/A	#N/A	#N/A	0	#N/A	#N/A	0	0	#N/A	#N/A	0	0	#N/A	#N/A	0	0	#N/A	#N/A	0	0	#N/A	#N/A	0	0	#N/A	#N/A	0
hsa-miR-659-5p				0	#N/A	#N/A	#N/A	#N/A	#N/A	0	#N/A	#N/A	0	0	#N/A	#N/A	0	0	#N/A	#N/A	0	0	#N/A	#N/A	0	0	#N/A	#N/A	0	0	#N/A	#N/A	0
hsa-miR-4740-5p				0	#N/A	#N/A	#N/A	#N/A	#N/A	0	#N/A	#N/A	0	0	#N/A	#N/A	0	0	#N/A	#N/A	0	0	#N/A	#N/A	0	0	#N/A	#N/A	0	0	#N/A	#N/A	0
hsa-miR-4515				0	#N/A	#N/A	#N/A	#N/A	#N/A	0	#N/A	#N/A	0	0	#N/A	#N/A	0	0	#N/A	#N/A	0	0	#N/A	#N/A	0	0	#N/A	#N/A	0	0	#N/A	#N/A	0
hsa-miR-4434				0	#N/A	#N/A	#N/A	#N/A	#N/A	0	#N/A	#N/A	0	0	#N/A	#N/A	0	0	#N/A	#N/A	0	0	#N/A	#N/A	0	0	#N/A	#N/A	0	0	#N/A	#N/A	0
hsa-miR-5703				0	#N/A	#N/A	#N/A	#N/A	#N/A	0	#N/A	#N/A	0	0	#N/A	#N/A	0	0	#N/A	#N/A	0	0	#N/A	#N/A	0	0	#N/A	#N/A	0	0	#N/A	#N/A	0
hsa-miR-5192				0	#N/A	#N/A	#N/A	#N/A	#N/A	0	#N/A	#N/A	0	0	#N/A	#N/A	0	0	#N/A	#N/A	0	0	#N/A	#N/A	0	0	#N/A	#N/A	0	0	#N/A	#N/A	0
hsa-miR-6081				0	#N/A	#N/A	#N/A	#N/A	#N/A	0	#N/A	#N/A	0	0	#N/A	#N/A	0	0	#N/A	#N/A	0	0	#N/A	#N/A	0	0	#N/A	#N/A	0	0	#N/A	#N/A	0
hsa-miR-4633-3p				0	#N/A	#N/A	#N/A	#N/A	#N/A	0	#N/A	#N/A	0	0	#N/A	#N/A	0	0	#N/A	#N/A	0	0	#N/A	#N/A	0	0	#N/A	#N/A	0	0	#N/A	#N/A	0
hsa-miR-6500-5p				0	#N/A	#N/A	#N/A	#N/A	#N/A	0	#N/A	#N/A	0	0	#N/A	#N/A	0	0	#N/A	#N/A	0	0	#N/A	#N/A	0	0	#N/A	#N/A	0	0	#N/A	#N/A	0
hsa-miR-766-5p				0	#N/A	#N/A	#N/A	#N/A	#N/A	0	#N/A	#N/A	0	0	#N/A	#N/A	0	0	#N/A	#N/A	0	0	#N/A	#N/A	0	0	#N/A	#N/A	0	0	#N/A	#N/A	0
hsa-miR-7154-3p				0	#N/A	#N/A	#N/A	#N/A	#N/A	0	#N/A	#N/A	0	0	#N/A	#N/A	0	0	#N/A	#N/A	0	0	#N/A	#N/A	0	0	#N/A	#N/A	0	0	#N/A	#N/A	0
hsa-miR-11181-3p				0	#N/A	#N/A	#N/A	#N/A	#N/A	0	#N/A	#N/A	0	0	#N/A	#N/A	0	0	#N/A	#N/A	0	0	#N/A	#N/A	0	0	#N/A	#N/A	0	0	#N/A	#N/A	0
hsa-miR-6894-5p				0	#N/A	#N/A	#N/A	#N/A	#N/A	0	#N/A	#N/A	0	0	#N/A	#N/A	0	0	#N/A	#N/A	0	0	#N/A	#N/A	0	0	#N/A	#N/A	0	0	#N/A	#N/A	0
hsa-miR-650				0	#N/A	#N/A	#N/A	#N/A	#N/A	0	#N/A	#N/A	0	0	#N/A	#N/A	0	0	#N/A	#N/A	0	0	#N/A	#N/A	0	0	#N/A	#N/A	0	0	#N/A	#N/A	0
hsa-miR-3612				0	#N/A	#N/A	#N/A	#N/A	#N/A	0	#N/A	#N/A	0	0	#N/A	#N/A	0	0	#N/A	#N/A	0	0	#N/A	#N/A	0	0	#N/A	#N/A	0	0	#N/A	#N/A	0
hsa-miR-6797-5p				0	#N/A	#N/A	#N/A	#N/A	#N/A	0	#N/A	#N/A	0	0	#N/A	#N/A	0	0	#N/A	#N/A	0	0	#N/A	#N/A	0	0	#N/A	#N/A	0	0	#N/A	#N/A	0
hsa-miR-1249-5p				0	#N/A	#N/A	#N/A	#N/A	#N/A	0	#N/A	#N/A	0	0	#N/A	#N/A	0	0	#N/A	#N/A	0	0	#N/A	#N/A	0	0	#N/A	#N/A	0	0	#N/A	#N/A	0
hsa-miR-6851-5p				0	#N/A	#N/A	#N/A	#N/A	#N/A	0	#N/A	#N/A	0	0	#N/A	#N/A	0	0	#N/A	#N/A	0	0	#N/A	#N/A	0	0	#N/A	#N/A	0	0	#N/A	#N/A	0
hsa-miR-5191				0	#N/A	#N/A	#N/A	#N/A	#N/A	0	#N/A	#N/A	0	0	#N/A	#N/A	0	0	#N/A	#N/A	0	0	#N/A	#N/A	0	0	#N/A	#N/A	0	0	#N/A	#N/A	0
hsa-miR-1255a				0	#N/A	#N/A	#N/A	#N/A	#N/A	0	#N/A	#N/A	0	0	#N/A	#N/A	0	0	#N/A	#N/A	0	0	#N/A	#N/A	0	0	#N/A	#N/A	0	0	#N/A	#N/A	0
hsa-miR-3167				0	#N/A	#N/A	#N/A	#N/A	#N/A	0	#N/A	#N/A	0	0	#N/A	#N/A	0	0	#N/A	#N/A	0	0	#N/A	#N/A	0	0	#N/A	#N/A	0	0	#N/A	#N/A	0
hsa-miR-31-5p				1	2.22385	1.15306	0.571805	0.894999	1	1	#N/A	#N/A	27.9497	0	#N/A	#N/A	0	0	#N/A	#N/A	0	3	#N/A	#N/A	125.339	0	#N/A	#N/A	0	0	#N/A	#N/A	0
hsa-miR-593-5p				0	#N/A	#N/A	#N/A	#N/A	#N/A	0	#N/A	#N/A	0	0	#N/A	#N/A	0	0	#N/A	#N/A	0	0	#N/A	#N/A	0	0	#N/A	#N/A	0	0	#N/A	#N/A	0
hsa-miR-564				0	#N/A	#N/A	#N/A	#N/A	#N/A	0	#N/A	#N/A	0	0	#N/A	#N/A	0	0	#N/A	#N/A	0	0	#N/A	#N/A	0	0	#N/A	#N/A	0	0	#N/A	#N/A	0
hsa-miR-885-3p				0	#N/A	#N/A	#N/A	#N/A	#N/A	0	#N/A	#N/A	0	0	#N/A	#N/A	0	0	#N/A	#N/A	0	0	#N/A	#N/A	0	0	#N/A	#N/A	0	0	#N/A	#N/A	0
hsa-miR-4763-3p				0	#N/A	#N/A	#N/A	#N/A	#N/A	0	#N/A	#N/A	0	0	#N/A	#N/A	0	0	#N/A	#N/A	0	0	#N/A	#N/A	0	0	#N/A	#N/A	0	0	#N/A	#N/A	0
hsa-miR-4736				0	#N/A	#N/A	#N/A	#N/A	#N/A	0	#N/A	#N/A	0	0	#N/A	#N/A	0	0	#N/A	#N/A	0	0	#N/A	#N/A	0	0	#N/A	#N/A	0	0	#N/A	#N/A	0
hsa-miR-34c-5p				0	#N/A	#N/A	#N/A	#N/A	#N/A	0	#N/A	#N/A	0	0	#N/A	#N/A	0	0	#N/A	#N/A	0	0	#N/A	#N/A	0	0	#N/A	#N/A	0	0	#N/A	#N/A	0
hsa-miR-449b-5p				0	#N/A	#N/A	#N/A	#N/A	#N/A	0	#N/A	#N/A	0	0	#N/A	#N/A	0	0	#N/A	#N/A	0	0	#N/A	#N/A	0	0	#N/A	#N/A	0	0	#N/A	#N/A	0
hsa-miR-3622b-5p				0	#N/A	#N/A	#N/A	#N/A	#N/A	0	#N/A	#N/A	0	0	#N/A	#N/A	0	0	#N/A	#N/A	0	0	#N/A	#N/A	0	0	#N/A	#N/A	0	0	#N/A	#N/A	0
hsa-miR-1256				0	#N/A	#N/A	#N/A	#N/A	#N/A	0	#N/A	#N/A	0	0	#N/A	#N/A	0	0	#N/A	#N/A	0	0	#N/A	#N/A	0	0	#N/A	#N/A	0	0	#N/A	#N/A	0
hsa-miR-4529-5p				0	#N/A	#N/A	#N/A	#N/A	#N/A	0	#N/A	#N/A	0	0	#N/A	#N/A	0	0	#N/A	#N/A	0	0	#N/A	#N/A	0	0	#N/A	#N/A	0	0	#N/A	#N/A	0
hsa-miR-6775-3p				0	#N/A	#N/A	#N/A	#N/A	#N/A	0	#N/A	#N/A	0	0	#N/A	#N/A	0	0	#N/A	#N/A	0	0	#N/A	#N/A	0	0	#N/A	#N/A	0	0	#N/A	#N/A	0
hsa-miR-4757-5p				0	#N/A	#N/A	#N/A	#N/A	#N/A	0	#N/A	#N/A	0	0	#N/A	#N/A	0	0	#N/A	#N/A	0	0	#N/A	#N/A	0	0	#N/A	#N/A	0	0	#N/A	#N/A	0
hsa-miR-6735-3p				0	#N/A	#N/A	#N/A	#N/A	#N/A	0	#N/A	#N/A	0	0	#N/A	#N/A	0	0	#N/A	#N/A	0	0	#N/A	#N/A	0	0	#N/A	#N/A	0	0	#N/A	#N/A	0
hsa-miR-6717-5p				0	#N/A	#N/A	#N/A	#N/A	#N/A	0	#N/A	#N/A	0	0	#N/A	#N/A	0	0	#N/A	#N/A	0	0	#N/A	#N/A	0	0	#N/A	#N/A	0	0	#N/A	#N/A	0
hsa-miR-6722-5p				0	#N/A	#N/A	#N/A	#N/A	#N/A	0	#N/A	#N/A	0	0	#N/A	#N/A	0	0	#N/A	#N/A	0	0	#N/A	#N/A	0	0	#N/A	#N/A	0	0	#N/A	#N/A	0
hsa-miR-25-5p				0	#N/A	#N/A	#N/A	#N/A	#N/A	0	#N/A	#N/A	0	0	#N/A	#N/A	0	0	#N/A	#N/A	0	0	#N/A	#N/A	0	0	#N/A	#N/A	0	0	#N/A	#N/A	0
hsa-miR-663a				0	#N/A	#N/A	#N/A	#N/A	#N/A	0	#N/A	#N/A	0	0	#N/A	#N/A	0	0	#N/A	#N/A	0	0	#N/A	#N/A	0	0	#N/A	#N/A	0	0	#N/A	#N/A	0
hsa-miR-6822-3p				0	#N/A	#N/A	#N/A	#N/A	#N/A	0	#N/A	#N/A	0	0	#N/A	#N/A	0	0	#N/A	#N/A	0	0	#N/A	#N/A	0	0	#N/A	#N/A	0	0	#N/A	#N/A	0
hsa-miR-604				0	#N/A	#N/A	#N/A	#N/A	#N/A	0	#N/A	#N/A	0	0	#N/A	#N/A	0	0	#N/A	#N/A	0	0	#N/A	#N/A	0	0	#N/A	#N/A	0	0	#N/A	#N/A	0
hsa-miR-4430				0	#N/A	#N/A	#N/A	#N/A	#N/A	0	#N/A	#N/A	0	0	#N/A	#N/A	0	0	#N/A	#N/A	0	0	#N/A	#N/A	0	0	#N/A	#N/A	0	0	#N/A	#N/A	0
hsa-miR-4505				0	#N/A	#N/A	#N/A	#N/A	#N/A	0	#N/A	#N/A	0	0	#N/A	#N/A	0	0	#N/A	#N/A	0	0	#N/A	#N/A	0	0	#N/A	#N/A	0	0	#N/A	#N/A	0
hsa-miR-7974				0	#N/A	#N/A	#N/A	#N/A	#N/A	0	#N/A	#N/A	0	0	#N/A	#N/A	0	0	#N/A	#N/A	0	0	#N/A	#N/A	0	0	#N/A	#N/A	0	0	#N/A	#N/A	0
hsa-miR-4668-5p				0	#N/A	#N/A	#N/A	#N/A	#N/A	0	#N/A	#N/A	0	0	#N/A	#N/A	0	0	#N/A	#N/A	0	0	#N/A	#N/A	0	0	#N/A	#N/A	0	0	#N/A	#N/A	0
hsa-miR-4747-5p				0	#N/A	#N/A	#N/A	#N/A	#N/A	0	#N/A	#N/A	0	0	#N/A	#N/A	0	0	#N/A	#N/A	0	0	#N/A	#N/A	0	0	#N/A	#N/A	0	0	#N/A	#N/A	0
hsa-miR-5196-5p				0	#N/A	#N/A	#N/A	#N/A	#N/A	0	#N/A	#N/A	0	0	#N/A	#N/A	0	0	#N/A	#N/A	0	0	#N/A	#N/A	0	0	#N/A	#N/A	0	0	#N/A	#N/A	0
hsa-miR-3649				0	#N/A	#N/A	#N/A	#N/A	#N/A	0	#N/A	#N/A	0	0	#N/A	#N/A	0	0	#N/A	#N/A	0	0	#N/A	#N/A	0	0	#N/A	#N/A	0	0	#N/A	#N/A	0
hsa-miR-92b-5p				0	#N/A	#N/A	#N/A	#N/A	#N/A	0	#N/A	#N/A	0	0	#N/A	#N/A	0	0	#N/A	#N/A	0	0	#N/A	#N/A	0	0	#N/A	#N/A	0	0	#N/A	#N/A	0
hsa-miR-3199				0	#N/A	#N/A	#N/A	#N/A	#N/A	0	#N/A	#N/A	0	0	#N/A	#N/A	0	0	#N/A	#N/A	0	0	#N/A	#N/A	0	0	#N/A	#N/A	0	0	#N/A	#N/A	0
hsa-miR-365b-5p				0	#N/A	#N/A	#N/A	#N/A	#N/A	0	#N/A	#N/A	0	0	#N/A	#N/A	0	0	#N/A	#N/A	0	0	#N/A	#N/A	0	0	#N/A	#N/A	0	0	#N/A	#N/A	0
hsa-miR-365a-5p				0	#N/A	#N/A	#N/A	#N/A	#N/A	0	#N/A	#N/A	0	0	#N/A	#N/A	0	0	#N/A	#N/A	0	0	#N/A	#N/A	0	0	#N/A	#N/A	0	0	#N/A	#N/A	0
hsa-miR-6878-5p				0	#N/A	#N/A	#N/A	#N/A	#N/A	0	#N/A	#N/A	0	0	#N/A	#N/A	0	0	#N/A	#N/A	0	0	#N/A	#N/A	0	0	#N/A	#N/A	0	0	#N/A	#N/A	0
hsa-miR-149-3p				0	#N/A	#N/A	#N/A	#N/A	#N/A	0	#N/A	#N/A	0	0	#N/A	#N/A	0	0	#N/A	#N/A	0	0	#N/A	#N/A	0	0	#N/A	#N/A	0	0	#N/A	#N/A	0
hsa-miR-6883-5p				0	#N/A	#N/A	#N/A	#N/A	#N/A	0	#N/A	#N/A	0	0	#N/A	#N/A	0	0	#N/A	#N/A	0	0	#N/A	#N/A	0	0	#N/A	#N/A	0	0	#N/A	#N/A	0
hsa-miR-638				0	#N/A	#N/A	#N/A	#N/A	#N/A	0	#N/A	#N/A	0	0	#N/A	#N/A	0	0	#N/A	#N/A	0	0	#N/A	#N/A	0	0	#N/A	#N/A	0	0	#N/A	#N/A	0
hsa-miR-3945				0	#N/A	#N/A	#N/A	#N/A	#N/A	0	#N/A	#N/A	0	0	#N/A	#N/A	0	0	#N/A	#N/A	0	0	#N/A	#N/A	0	0	#N/A	#N/A	0	0	#N/A	#N/A	0
hsa-miR-4253				0	#N/A	#N/A	#N/A	#N/A	#N/A	0	#N/A	#N/A	0	0	#N/A	#N/A	0	0	#N/A	#N/A	0	0	#N/A	#N/A	0	0	#N/A	#N/A	0	0	#N/A	#N/A	0
hsa-miR-4726-5p				0	#N/A	#N/A	#N/A	#N/A	#N/A	0	#N/A	#N/A	0	0	#N/A	#N/A	0	0	#N/A	#N/A	0	0	#N/A	#N/A	0	0	#N/A	#N/A	0	0	#N/A	#N/A	0
hsa-miR-296-5p				0	#N/A	#N/A	#N/A	#N/A	#N/A	0	#N/A	#N/A	0	0	#N/A	#N/A	0	0	#N/A	#N/A	0	0	#N/A	#N/A	0	0	#N/A	#N/A	0	0	#N/A	#N/A	0
hsa-miR-6877-5p				0	#N/A	#N/A	#N/A	#N/A	#N/A	0	#N/A	#N/A	0	0	#N/A	#N/A	0	0	#N/A	#N/A	0	0	#N/A	#N/A	0	0	#N/A	#N/A	0	0	#N/A	#N/A	0
hsa-miR-5001-5p				0	#N/A	#N/A	#N/A	#N/A	#N/A	0	#N/A	#N/A	0	0	#N/A	#N/A	0	0	#N/A	#N/A	0	0	#N/A	#N/A	0	0	#N/A	#N/A	0	0	#N/A	#N/A	0
hsa-miR-27a-5p				1	-3.30041	-1.72265	0.357846	0.769103	1	3	#N/A	#N/A	83.8491	0	#N/A	#N/A	0	0	#N/A	#N/A	0	1	#N/A	#N/A	41.7796	0	#N/A	#N/A	0	0	#N/A	#N/A	0
hsa-miR-3144-5p				0	#N/A	#N/A	#N/A	#N/A	#N/A	0	#N/A	#N/A	0	0	#N/A	#N/A	0	0	#N/A	#N/A	0	0	#N/A	#N/A	0	0	#N/A	#N/A	0	0	#N/A	#N/A	0
hsa-miR-4652-5p				0	#N/A	#N/A	#N/A	#N/A	#N/A	0	#N/A	#N/A	0	0	#N/A	#N/A	0	0	#N/A	#N/A	0	0	#N/A	#N/A	0	0	#N/A	#N/A	0	0	#N/A	#N/A	0
hsa-miR-185-3p				0	#N/A	#N/A	#N/A	#N/A	#N/A	0	#N/A	#N/A	0	0	#N/A	#N/A	0	0	#N/A	#N/A	0	0	#N/A	#N/A	0	0	#N/A	#N/A	0	0	#N/A	#N/A	0
hsa-miR-625-5p				0	#N/A	#N/A	#N/A	#N/A	#N/A	0	#N/A	#N/A	0	0	#N/A	#N/A	0	0	#N/A	#N/A	0	0	#N/A	#N/A	0	0	#N/A	#N/A	0	0	#N/A	#N/A	0
hsa-miR-5010-5p				0	#N/A	#N/A	#N/A	#N/A	#N/A	0	#N/A	#N/A	0	0	#N/A	#N/A	0	0	#N/A	#N/A	0	0	#N/A	#N/A	0	0	#N/A	#N/A	0	0	#N/A	#N/A	0
hsa-miR-4697-5p				0	#N/A	#N/A	#N/A	#N/A	#N/A	0	#N/A	#N/A	0	0	#N/A	#N/A	0	0	#N/A	#N/A	0	0	#N/A	#N/A	0	0	#N/A	#N/A	0	0	#N/A	#N/A	0
hsa-miR-4488				0	#N/A	#N/A	#N/A	#N/A	#N/A	0	#N/A	#N/A	0	0	#N/A	#N/A	0	0	#N/A	#N/A	0	0	#N/A	#N/A	0	0	#N/A	#N/A	0	0	#N/A	#N/A	0
hsa-miR-6885-5p				0	#N/A	#N/A	#N/A	#N/A	#N/A	0	#N/A	#N/A	0	0	#N/A	#N/A	0	0	#N/A	#N/A	0	0	#N/A	#N/A	0	0	#N/A	#N/A	0	0	#N/A	#N/A	0
hsa-miR-6835-5p				0	#N/A	#N/A	#N/A	#N/A	#N/A	0	#N/A	#N/A	0	0	#N/A	#N/A	0	0	#N/A	#N/A	0	0	#N/A	#N/A	0	0	#N/A	#N/A	0	0	#N/A	#N/A	0
hsa-miR-342-5p				0	#N/A	#N/A	#N/A	#N/A	#N/A	0	#N/A	#N/A	0	0	#N/A	#N/A	0	0	#N/A	#N/A	0	0	#N/A	#N/A	0	0	#N/A	#N/A	0	0	#N/A	#N/A	0
hsa-miR-608				0	#N/A	#N/A	#N/A	#N/A	#N/A	0	#N/A	#N/A	0	0	#N/A	#N/A	0	0	#N/A	#N/A	0	0	#N/A	#N/A	0	0	#N/A	#N/A	0	0	#N/A	#N/A	0
hsa-miR-6747-5p				0	#N/A	#N/A	#N/A	#N/A	#N/A	0	#N/A	#N/A	0	0	#N/A	#N/A	0	0	#N/A	#N/A	0	0	#N/A	#N/A	0	0	#N/A	#N/A	0	0	#N/A	#N/A	0
hsa-miR-555				0	#N/A	#N/A	#N/A	#N/A	#N/A	0	#N/A	#N/A	0	0	#N/A	#N/A	0	0	#N/A	#N/A	0	0	#N/A	#N/A	0	0	#N/A	#N/A	0	0	#N/A	#N/A	0
hsa-miR-6756-5p				0	#N/A	#N/A	#N/A	#N/A	#N/A	0	#N/A	#N/A	0	0	#N/A	#N/A	0	0	#N/A	#N/A	0	0	#N/A	#N/A	0	0	#N/A	#N/A	0	0	#N/A	#N/A	0
hsa-miR-4455				0.333333	-5.81155	-2.53892	0.373246	#N/A	1	1	#N/A	#N/A	27.9497	0	#N/A	#N/A	0	0	#N/A	#N/A	0	0	#N/A	#N/A	0	0	#N/A	#N/A	0	0	#N/A	#N/A	0
hsa-miR-609				0	#N/A	#N/A	#N/A	#N/A	#N/A	0	#N/A	#N/A	0	0	#N/A	#N/A	0	0	#N/A	#N/A	0	0	#N/A	#N/A	0	0	#N/A	#N/A	0	0	#N/A	#N/A	0
hsa-miR-4650-3p				0	#N/A	#N/A	#N/A	#N/A	#N/A	0	#N/A	#N/A	0	0	#N/A	#N/A	0	0	#N/A	#N/A	0	0	#N/A	#N/A	0	0	#N/A	#N/A	0	0	#N/A	#N/A	0
hsa-miR-3529-5p				0	#N/A	#N/A	#N/A	#N/A	#N/A	0	#N/A	#N/A	0	0	#N/A	#N/A	0	0	#N/A	#N/A	0	0	#N/A	#N/A	0	0	#N/A	#N/A	0	0	#N/A	#N/A	0
hsa-miR-5681b				0	#N/A	#N/A	#N/A	#N/A	#N/A	0	#N/A	#N/A	0	0	#N/A	#N/A	0	0	#N/A	#N/A	0	0	#N/A	#N/A	0	0	#N/A	#N/A	0	0	#N/A	#N/A	0
hsa-miR-6503-5p				0	#N/A	#N/A	#N/A	#N/A	#N/A	0	#N/A	#N/A	0	0	#N/A	#N/A	0	0	#N/A	#N/A	0	0	#N/A	#N/A	0	0	#N/A	#N/A	0	0	#N/A	#N/A	0
hsa-miR-3085-5p				0	#N/A	#N/A	#N/A	#N/A	#N/A	0	#N/A	#N/A	0	0	#N/A	#N/A	0	0	#N/A	#N/A	0	0	#N/A	#N/A	0	0	#N/A	#N/A	0	0	#N/A	#N/A	0
hsa-miR-3907				0	#N/A	#N/A	#N/A	#N/A	#N/A	0	#N/A	#N/A	0	0	#N/A	#N/A	0	0	#N/A	#N/A	0	0	#N/A	#N/A	0	0	#N/A	#N/A	0	0	#N/A	#N/A	0
hsa-miR-3165				0	#N/A	#N/A	#N/A	#N/A	#N/A	0	#N/A	#N/A	0	0	#N/A	#N/A	0	0	#N/A	#N/A	0	0	#N/A	#N/A	0	0	#N/A	#N/A	0	0	#N/A	#N/A	0
hsa-miR-6769a-5p				0	#N/A	#N/A	#N/A	#N/A	#N/A	0	#N/A	#N/A	0	0	#N/A	#N/A	0	0	#N/A	#N/A	0	0	#N/A	#N/A	0	0	#N/A	#N/A	0	0	#N/A	#N/A	0
hsa-miR-323a-5p				0	#N/A	#N/A	#N/A	#N/A	#N/A	0	#N/A	#N/A	0	0	#N/A	#N/A	0	0	#N/A	#N/A	0	0	#N/A	#N/A	0	0	#N/A	#N/A	0	0	#N/A	#N/A	0
hsa-miR-3650				0	#N/A	#N/A	#N/A	#N/A	#N/A	0	#N/A	#N/A	0	0	#N/A	#N/A	0	0	#N/A	#N/A	0	0	#N/A	#N/A	0	0	#N/A	#N/A	0	0	#N/A	#N/A	0
hsa-miR-4694-5p				0	#N/A	#N/A	#N/A	#N/A	#N/A	0	#N/A	#N/A	0	0	#N/A	#N/A	0	0	#N/A	#N/A	0	0	#N/A	#N/A	0	0	#N/A	#N/A	0	0	#N/A	#N/A	0
hsa-miR-409-5p				0	#N/A	#N/A	#N/A	#N/A	#N/A	0	#N/A	#N/A	0	0	#N/A	#N/A	0	0	#N/A	#N/A	0	0	#N/A	#N/A	0	0	#N/A	#N/A	0	0	#N/A	#N/A	0
hsa-miR-152-5p				0	#N/A	#N/A	#N/A	#N/A	#N/A	0	#N/A	#N/A	0	0	#N/A	#N/A	0	0	#N/A	#N/A	0	0	#N/A	#N/A	0	0	#N/A	#N/A	0	0	#N/A	#N/A	0
hsa-miR-563				0	#N/A	#N/A	#N/A	#N/A	#N/A	0	#N/A	#N/A	0	0	#N/A	#N/A	0	0	#N/A	#N/A	0	0	#N/A	#N/A	0	0	#N/A	#N/A	0	0	#N/A	#N/A	0
hsa-miR-656-5p				0	#N/A	#N/A	#N/A	#N/A	#N/A	0	#N/A	#N/A	0	0	#N/A	#N/A	0	0	#N/A	#N/A	0	0	#N/A	#N/A	0	0	#N/A	#N/A	0	0	#N/A	#N/A	0
hsa-miR-92a-1-5p				0	#N/A	#N/A	#N/A	#N/A	#N/A	0	#N/A	#N/A	0	0	#N/A	#N/A	0	0	#N/A	#N/A	0	0	#N/A	#N/A	0	0	#N/A	#N/A	0	0	#N/A	#N/A	0
hsa-miR-323b-5p				0.333333	2.37647	1.24882	0.624194	#N/A	1	0	#N/A	#N/A	0	0	#N/A	#N/A	0	0	#N/A	#N/A	0	1	#N/A	#N/A	41.7796	0	#N/A	#N/A	0	0	#N/A	#N/A	0
hsa-miR-494-5p				0.333333	2.37568	1.24834	0.620107	#N/A	1	0	#N/A	#N/A	0	0	#N/A	#N/A	0	0	#N/A	#N/A	0	0	#N/A	#N/A	0	1	#N/A	#N/A	19.4098	0	#N/A	#N/A	0
hsa-miR-410-5p				0	#N/A	#N/A	#N/A	#N/A	#N/A	0	#N/A	#N/A	0	0	#N/A	#N/A	0	0	#N/A	#N/A	0	0	#N/A	#N/A	0	0	#N/A	#N/A	0	0	#N/A	#N/A	0
hsa-miR-6832-5p				0	#N/A	#N/A	#N/A	#N/A	#N/A	0	#N/A	#N/A	0	0	#N/A	#N/A	0	0	#N/A	#N/A	0	0	#N/A	#N/A	0	0	#N/A	#N/A	0	0	#N/A	#N/A	0
hsa-miR-567				0	#N/A	#N/A	#N/A	#N/A	#N/A	0	#N/A	#N/A	0	0	#N/A	#N/A	0	0	#N/A	#N/A	0	0	#N/A	#N/A	0	0	#N/A	#N/A	0	0	#N/A	#N/A	0
hsa-miR-630				0	#N/A	#N/A	#N/A	#N/A	#N/A	0	#N/A	#N/A	0	0	#N/A	#N/A	0	0	#N/A	#N/A	0	0	#N/A	#N/A	0	0	#N/A	#N/A	0	0	#N/A	#N/A	0
hsa-miR-616-3p				0	#N/A	#N/A	#N/A	#N/A	#N/A	0	#N/A	#N/A	0	0	#N/A	#N/A	0	0	#N/A	#N/A	0	0	#N/A	#N/A	0	0	#N/A	#N/A	0	0	#N/A	#N/A	0
hsa-miR-1257				0	#N/A	#N/A	#N/A	#N/A	#N/A	0	#N/A	#N/A	0	0	#N/A	#N/A	0	0	#N/A	#N/A	0	0	#N/A	#N/A	0	0	#N/A	#N/A	0	0	#N/A	#N/A	0
hsa-miR-550a-3-5p				0	#N/A	#N/A	#N/A	#N/A	#N/A	0	#N/A	#N/A	0	0	#N/A	#N/A	0	0	#N/A	#N/A	0	0	#N/A	#N/A	0	0	#N/A	#N/A	0	0	#N/A	#N/A	0
hsa-miR-550a-5p				0	#N/A	#N/A	#N/A	#N/A	#N/A	0	#N/A	#N/A	0	0	#N/A	#N/A	0	0	#N/A	#N/A	0	0	#N/A	#N/A	0	0	#N/A	#N/A	0	0	#N/A	#N/A	0
hsa-miR-1271-3p				0	#N/A	#N/A	#N/A	#N/A	#N/A	0	#N/A	#N/A	0	0	#N/A	#N/A	0	0	#N/A	#N/A	0	0	#N/A	#N/A	0	0	#N/A	#N/A	0	0	#N/A	#N/A	0
hsa-miR-4800-5p				0	#N/A	#N/A	#N/A	#N/A	#N/A	0	#N/A	#N/A	0	0	#N/A	#N/A	0	0	#N/A	#N/A	0	0	#N/A	#N/A	0	0	#N/A	#N/A	0	0	#N/A	#N/A	0
hsa-miR-3691-5p				0	#N/A	#N/A	#N/A	#N/A	#N/A	0	#N/A	#N/A	0	0	#N/A	#N/A	0	0	#N/A	#N/A	0	0	#N/A	#N/A	0	0	#N/A	#N/A	0	0	#N/A	#N/A	0
hsa-miR-3688-5p				0	#N/A	#N/A	#N/A	#N/A	#N/A	0	#N/A	#N/A	0	0	#N/A	#N/A	0	0	#N/A	#N/A	0	0	#N/A	#N/A	0	0	#N/A	#N/A	0	0	#N/A	#N/A	0
hsa-miR-891a-3p				0	#N/A	#N/A	#N/A	#N/A	#N/A	0	#N/A	#N/A	0	0	#N/A	#N/A	0	0	#N/A	#N/A	0	0	#N/A	#N/A	0	0	#N/A	#N/A	0	0	#N/A	#N/A	0
hsa-miR-6778-5p				0	#N/A	#N/A	#N/A	#N/A	#N/A	0	#N/A	#N/A	0	0	#N/A	#N/A	0	0	#N/A	#N/A	0	0	#N/A	#N/A	0	0	#N/A	#N/A	0	0	#N/A	#N/A	0
hsa-miR-1233-5p				0	#N/A	#N/A	#N/A	#N/A	#N/A	0	#N/A	#N/A	0	0	#N/A	#N/A	0	0	#N/A	#N/A	0	0	#N/A	#N/A	0	0	#N/A	#N/A	0	0	#N/A	#N/A	0
hsa-miR-491-5p				0	#N/A	#N/A	#N/A	#N/A	#N/A	0	#N/A	#N/A	0	0	#N/A	#N/A	0	0	#N/A	#N/A	0	0	#N/A	#N/A	0	0	#N/A	#N/A	0	0	#N/A	#N/A	0
hsa-miR-6742-5p				0	#N/A	#N/A	#N/A	#N/A	#N/A	0	#N/A	#N/A	0	0	#N/A	#N/A	0	0	#N/A	#N/A	0	0	#N/A	#N/A	0	0	#N/A	#N/A	0	0	#N/A	#N/A	0
hsa-miR-203a-5p				0	#N/A	#N/A	#N/A	#N/A	#N/A	0	#N/A	#N/A	0	0	#N/A	#N/A	0	0	#N/A	#N/A	0	0	#N/A	#N/A	0	0	#N/A	#N/A	0	0	#N/A	#N/A	0
hsa-miR-644a				0	#N/A	#N/A	#N/A	#N/A	#N/A	0	#N/A	#N/A	0	0	#N/A	#N/A	0	0	#N/A	#N/A	0	0	#N/A	#N/A	0	0	#N/A	#N/A	0	0	#N/A	#N/A	0
hsa-miR-569				0	#N/A	#N/A	#N/A	#N/A	#N/A	0	#N/A	#N/A	0	0	#N/A	#N/A	0	0	#N/A	#N/A	0	0	#N/A	#N/A	0	0	#N/A	#N/A	0	0	#N/A	#N/A	0
hsa-miR-1258				0	#N/A	#N/A	#N/A	#N/A	#N/A	0	#N/A	#N/A	0	0	#N/A	#N/A	0	0	#N/A	#N/A	0	0	#N/A	#N/A	0	0	#N/A	#N/A	0	0	#N/A	#N/A	0
hsa-miR-22-5p				0	#N/A	#N/A	#N/A	#N/A	#N/A	0	#N/A	#N/A	0	0	#N/A	#N/A	0	0	#N/A	#N/A	0	0	#N/A	#N/A	0	0	#N/A	#N/A	0	0	#N/A	#N/A	0
hsa-miR-6501-5p				0	#N/A	#N/A	#N/A	#N/A	#N/A	0	#N/A	#N/A	0	0	#N/A	#N/A	0	0	#N/A	#N/A	0	0	#N/A	#N/A	0	0	#N/A	#N/A	0	0	#N/A	#N/A	0
hsa-miR-4423-5p				0	#N/A	#N/A	#N/A	#N/A	#N/A	0	#N/A	#N/A	0	0	#N/A	#N/A	0	0	#N/A	#N/A	0	0	#N/A	#N/A	0	0	#N/A	#N/A	0	0	#N/A	#N/A	0
hsa-miR-6740-5p				0	#N/A	#N/A	#N/A	#N/A	#N/A	0	#N/A	#N/A	0	0	#N/A	#N/A	0	0	#N/A	#N/A	0	0	#N/A	#N/A	0	0	#N/A	#N/A	0	0	#N/A	#N/A	0
hsa-miR-19b-1-5p				0	#N/A	#N/A	#N/A	#N/A	#N/A	0	#N/A	#N/A	0	0	#N/A	#N/A	0	0	#N/A	#N/A	0	0	#N/A	#N/A	0	0	#N/A	#N/A	0	0	#N/A	#N/A	0
hsa-miR-19b-2-5p				0	#N/A	#N/A	#N/A	#N/A	#N/A	0	#N/A	#N/A	0	0	#N/A	#N/A	0	0	#N/A	#N/A	0	0	#N/A	#N/A	0	0	#N/A	#N/A	0	0	#N/A	#N/A	0
hsa-miR-19a-5p				0	#N/A	#N/A	#N/A	#N/A	#N/A	0	#N/A	#N/A	0	0	#N/A	#N/A	0	0	#N/A	#N/A	0	0	#N/A	#N/A	0	0	#N/A	#N/A	0	0	#N/A	#N/A	0
hsa-miR-9-3p				0	#N/A	#N/A	#N/A	#N/A	#N/A	0	#N/A	#N/A	0	0	#N/A	#N/A	0	0	#N/A	#N/A	0	0	#N/A	#N/A	0	0	#N/A	#N/A	0	0	#N/A	#N/A	0
hsa-miR-3143				0	#N/A	#N/A	#N/A	#N/A	#N/A	0	#N/A	#N/A	0	0	#N/A	#N/A	0	0	#N/A	#N/A	0	0	#N/A	#N/A	0	0	#N/A	#N/A	0	0	#N/A	#N/A	0
hsa-miR-208b-3p				0	#N/A	#N/A	#N/A	#N/A	#N/A	0	#N/A	#N/A	0	0	#N/A	#N/A	0	0	#N/A	#N/A	0	0	#N/A	#N/A	0	0	#N/A	#N/A	0	0	#N/A	#N/A	0
hsa-miR-208a-3p				0	#N/A	#N/A	#N/A	#N/A	#N/A	0	#N/A	#N/A	0	0	#N/A	#N/A	0	0	#N/A	#N/A	0	0	#N/A	#N/A	0	0	#N/A	#N/A	0	0	#N/A	#N/A	0
hsa-miR-374c-5p				0	#N/A	#N/A	#N/A	#N/A	#N/A	0	#N/A	#N/A	0	0	#N/A	#N/A	0	0	#N/A	#N/A	0	0	#N/A	#N/A	0	0	#N/A	#N/A	0	0	#N/A	#N/A	0
hsa-miR-655-3p				0	#N/A	#N/A	#N/A	#N/A	#N/A	0	#N/A	#N/A	0	0	#N/A	#N/A	0	0	#N/A	#N/A	0	0	#N/A	#N/A	0	0	#N/A	#N/A	0	0	#N/A	#N/A	0
hsa-miR-466				0	#N/A	#N/A	#N/A	#N/A	#N/A	0	#N/A	#N/A	0	0	#N/A	#N/A	0	0	#N/A	#N/A	0	0	#N/A	#N/A	0	0	#N/A	#N/A	0	0	#N/A	#N/A	0
hsa-miR-4666a-5p				0	#N/A	#N/A	#N/A	#N/A	#N/A	0	#N/A	#N/A	0	0	#N/A	#N/A	0	0	#N/A	#N/A	0	0	#N/A	#N/A	0	0	#N/A	#N/A	0	0	#N/A	#N/A	0
hsa-miR-5591-3p				0	#N/A	#N/A	#N/A	#N/A	#N/A	0	#N/A	#N/A	0	0	#N/A	#N/A	0	0	#N/A	#N/A	0	0	#N/A	#N/A	0	0	#N/A	#N/A	0	0	#N/A	#N/A	0
hsa-miR-4777-3p				0	#N/A	#N/A	#N/A	#N/A	#N/A	0	#N/A	#N/A	0	0	#N/A	#N/A	0	0	#N/A	#N/A	0	0	#N/A	#N/A	0	0	#N/A	#N/A	0	0	#N/A	#N/A	0
hsa-miR-4693-5p				0	#N/A	#N/A	#N/A	#N/A	#N/A	0	#N/A	#N/A	0	0	#N/A	#N/A	0	0	#N/A	#N/A	0	0	#N/A	#N/A	0	0	#N/A	#N/A	0	0	#N/A	#N/A	0
hsa-miR-4766-3p				0	#N/A	#N/A	#N/A	#N/A	#N/A	0	#N/A	#N/A	0	0	#N/A	#N/A	0	0	#N/A	#N/A	0	0	#N/A	#N/A	0	0	#N/A	#N/A	0	0	#N/A	#N/A	0
hsa-miR-4524b-5p				0	#N/A	#N/A	#N/A	#N/A	#N/A	0	#N/A	#N/A	0	0	#N/A	#N/A	0	0	#N/A	#N/A	0	0	#N/A	#N/A	0	0	#N/A	#N/A	0	0	#N/A	#N/A	0
hsa-miR-4524a-5p				0	#N/A	#N/A	#N/A	#N/A	#N/A	0	#N/A	#N/A	0	0	#N/A	#N/A	0	0	#N/A	#N/A	0	0	#N/A	#N/A	0	0	#N/A	#N/A	0	0	#N/A	#N/A	0
hsa-miR-3117-3p				0	#N/A	#N/A	#N/A	#N/A	#N/A	0	#N/A	#N/A	0	0	#N/A	#N/A	0	0	#N/A	#N/A	0	0	#N/A	#N/A	0	0	#N/A	#N/A	0	0	#N/A	#N/A	0
hsa-miR-4423-3p				0	#N/A	#N/A	#N/A	#N/A	#N/A	0	#N/A	#N/A	0	0	#N/A	#N/A	0	0	#N/A	#N/A	0	0	#N/A	#N/A	0	0	#N/A	#N/A	0	0	#N/A	#N/A	0
hsa-miR-4727-3p				0	#N/A	#N/A	#N/A	#N/A	#N/A	0	#N/A	#N/A	0	0	#N/A	#N/A	0	0	#N/A	#N/A	0	0	#N/A	#N/A	0	0	#N/A	#N/A	0	0	#N/A	#N/A	0
hsa-miR-4460				0	#N/A	#N/A	#N/A	#N/A	#N/A	0	#N/A	#N/A	0	0	#N/A	#N/A	0	0	#N/A	#N/A	0	0	#N/A	#N/A	0	0	#N/A	#N/A	0	0	#N/A	#N/A	0
hsa-miR-374b-5p				0	#N/A	#N/A	#N/A	#N/A	#N/A	0	#N/A	#N/A	0	0	#N/A	#N/A	0	0	#N/A	#N/A	0	0	#N/A	#N/A	0	0	#N/A	#N/A	0	0	#N/A	#N/A	0
hsa-miR-1185-2-3p				0	#N/A	#N/A	#N/A	#N/A	#N/A	0	#N/A	#N/A	0	0	#N/A	#N/A	0	0	#N/A	#N/A	0	0	#N/A	#N/A	0	0	#N/A	#N/A	0	0	#N/A	#N/A	0
hsa-miR-1185-1-3p				0	#N/A	#N/A	#N/A	#N/A	#N/A	0	#N/A	#N/A	0	0	#N/A	#N/A	0	0	#N/A	#N/A	0	0	#N/A	#N/A	0	0	#N/A	#N/A	0	0	#N/A	#N/A	0
hsa-miR-3144-3p				0	#N/A	#N/A	#N/A	#N/A	#N/A	0	#N/A	#N/A	0	0	#N/A	#N/A	0	0	#N/A	#N/A	0	0	#N/A	#N/A	0	0	#N/A	#N/A	0	0	#N/A	#N/A	0
hsa-miR-4633-5p				0	#N/A	#N/A	#N/A	#N/A	#N/A	0	#N/A	#N/A	0	0	#N/A	#N/A	0	0	#N/A	#N/A	0	0	#N/A	#N/A	0	0	#N/A	#N/A	0	0	#N/A	#N/A	0
hsa-miR-3115				0	#N/A	#N/A	#N/A	#N/A	#N/A	0	#N/A	#N/A	0	0	#N/A	#N/A	0	0	#N/A	#N/A	0	0	#N/A	#N/A	0	0	#N/A	#N/A	0	0	#N/A	#N/A	0
hsa-miR-3924				0	#N/A	#N/A	#N/A	#N/A	#N/A	0	#N/A	#N/A	0	0	#N/A	#N/A	0	0	#N/A	#N/A	0	0	#N/A	#N/A	0	0	#N/A	#N/A	0	0	#N/A	#N/A	0
hsa-miR-556-3p				0	#N/A	#N/A	#N/A	#N/A	#N/A	0	#N/A	#N/A	0	0	#N/A	#N/A	0	0	#N/A	#N/A	0	0	#N/A	#N/A	0	0	#N/A	#N/A	0	0	#N/A	#N/A	0
hsa-miR-4795-3p				0	#N/A	#N/A	#N/A	#N/A	#N/A	0	#N/A	#N/A	0	0	#N/A	#N/A	0	0	#N/A	#N/A	0	0	#N/A	#N/A	0	0	#N/A	#N/A	0	0	#N/A	#N/A	0
hsa-miR-3671				0	#N/A	#N/A	#N/A	#N/A	#N/A	0	#N/A	#N/A	0	0	#N/A	#N/A	0	0	#N/A	#N/A	0	0	#N/A	#N/A	0	0	#N/A	#N/A	0	0	#N/A	#N/A	0
hsa-miR-421				0	#N/A	#N/A	#N/A	#N/A	#N/A	0	#N/A	#N/A	0	0	#N/A	#N/A	0	0	#N/A	#N/A	0	0	#N/A	#N/A	0	0	#N/A	#N/A	0	0	#N/A	#N/A	0
hsa-miR-561-5p				0	#N/A	#N/A	#N/A	#N/A	#N/A	0	#N/A	#N/A	0	0	#N/A	#N/A	0	0	#N/A	#N/A	0	0	#N/A	#N/A	0	0	#N/A	#N/A	0	0	#N/A	#N/A	0
hsa-miR-377-3p				0	#N/A	#N/A	#N/A	#N/A	#N/A	0	#N/A	#N/A	0	0	#N/A	#N/A	0	0	#N/A	#N/A	0	0	#N/A	#N/A	0	0	#N/A	#N/A	0	0	#N/A	#N/A	0
hsa-miR-23b-3p				1	1.4017	0.487173	0.791598	0.96669	1	1	#N/A	#N/A	27.9497	0	#N/A	#N/A	0	1	#N/A	#N/A	35.6651	1	#N/A	#N/A	41.7796	0	#N/A	#N/A	0	2	#N/A	#N/A	270.524
hsa-miR-23a-3p				143.667	8.43529	3.07644	0.0649231	0.389538	1	45	#N/A	#N/A	1257.74	0	#N/A	#N/A	0	2	#N/A	#N/A	71.3302	182	#N/A	#N/A	7603.89	237	#N/A	#N/A	4600.13	12	#N/A	#N/A	1623.14
hsa-miR-23c				0	#N/A	#N/A	#N/A	#N/A	#N/A	0	#N/A	#N/A	0	0	#N/A	#N/A	0	0	#N/A	#N/A	0	0	#N/A	#N/A	0	0	#N/A	#N/A	0	0	#N/A	#N/A	0
hsa-miR-3127-5p				0	#N/A	#N/A	#N/A	#N/A	#N/A	0	#N/A	#N/A	0	0	#N/A	#N/A	0	0	#N/A	#N/A	0	0	#N/A	#N/A	0	0	#N/A	#N/A	0	0	#N/A	#N/A	0
hsa-miR-539-3p				0	#N/A	#N/A	#N/A	#N/A	#N/A	0	#N/A	#N/A	0	0	#N/A	#N/A	0	0	#N/A	#N/A	0	0	#N/A	#N/A	0	0	#N/A	#N/A	0	0	#N/A	#N/A	0
hsa-miR-376a-3p				1.33333	1.82807	0.870317	0.6766	0.963063	1	2	#N/A	#N/A	55.8994	0	#N/A	#N/A	0	0	#N/A	#N/A	0	4	#N/A	#N/A	167.118	0	#N/A	#N/A	0	0	#N/A	#N/A	0
hsa-miR-376b-3p				1	-13.891	-3.79607	0.188789	0.636374	1	3	#N/A	#N/A	83.8491	0	#N/A	#N/A	0	0	#N/A	#N/A	0	0	#N/A	#N/A	0	0	#N/A	#N/A	0	0	#N/A	#N/A	0
hsa-miR-5007-3p				0	#N/A	#N/A	#N/A	#N/A	#N/A	0	#N/A	#N/A	0	0	#N/A	#N/A	0	0	#N/A	#N/A	0	0	#N/A	#N/A	0	0	#N/A	#N/A	0	0	#N/A	#N/A	0
hsa-miR-433-3p				0	#N/A	#N/A	#N/A	#N/A	#N/A	0	#N/A	#N/A	0	0	#N/A	#N/A	0	0	#N/A	#N/A	0	0	#N/A	#N/A	0	0	#N/A	#N/A	0	0	#N/A	#N/A	0
hsa-miR-6516-3p				0	#N/A	#N/A	#N/A	#N/A	#N/A	0	#N/A	#N/A	0	0	#N/A	#N/A	0	0	#N/A	#N/A	0	0	#N/A	#N/A	0	0	#N/A	#N/A	0	0	#N/A	#N/A	0
hsa-miR-5195-3p				0	#N/A	#N/A	#N/A	#N/A	#N/A	0	#N/A	#N/A	0	0	#N/A	#N/A	0	0	#N/A	#N/A	0	0	#N/A	#N/A	0	0	#N/A	#N/A	0	0	#N/A	#N/A	0
hsa-miR-1260b				73.6667	63.645	5.99198	0.0453174	0.343683	1	0	#N/A	#N/A	0	0	#N/A	#N/A	0	1	#N/A	#N/A	35.6651	0	#N/A	#N/A	0	221	#N/A	#N/A	4289.57	0	#N/A	#N/A	0
hsa-miR-1260a				613	-4.68953	-2.22944	0.167574	0.635018	1	498	#N/A	#N/A	13918.9	540	#N/A	#N/A	275985	470	#N/A	#N/A	16762.6	1323	#N/A	#N/A	55274.4	516	#N/A	#N/A	10015.5	0	#N/A	#N/A	0
hsa-miR-2355-5p				0	#N/A	#N/A	#N/A	#N/A	#N/A	0	#N/A	#N/A	0	0	#N/A	#N/A	0	0	#N/A	#N/A	0	0	#N/A	#N/A	0	0	#N/A	#N/A	0	0	#N/A	#N/A	0
hsa-miR-623				0	#N/A	#N/A	#N/A	#N/A	#N/A	0	#N/A	#N/A	0	0	#N/A	#N/A	0	0	#N/A	#N/A	0	0	#N/A	#N/A	0	0	#N/A	#N/A	0	0	#N/A	#N/A	0
hsa-miR-937-3p				0	#N/A	#N/A	#N/A	#N/A	#N/A	0	#N/A	#N/A	0	0	#N/A	#N/A	0	0	#N/A	#N/A	0	0	#N/A	#N/A	0	0	#N/A	#N/A	0	0	#N/A	#N/A	0
hsa-miR-7975				0	#N/A	#N/A	#N/A	#N/A	#N/A	0	#N/A	#N/A	0	0	#N/A	#N/A	0	0	#N/A	#N/A	0	0	#N/A	#N/A	0	0	#N/A	#N/A	0	0	#N/A	#N/A	0
hsa-miR-7111-3p				0	#N/A	#N/A	#N/A	#N/A	#N/A	0	#N/A	#N/A	0	0	#N/A	#N/A	0	0	#N/A	#N/A	0	0	#N/A	#N/A	0	0	#N/A	#N/A	0	0	#N/A	#N/A	0
hsa-miR-6881-3p				0	#N/A	#N/A	#N/A	#N/A	#N/A	0	#N/A	#N/A	0	0	#N/A	#N/A	0	0	#N/A	#N/A	0	0	#N/A	#N/A	0	0	#N/A	#N/A	0	0	#N/A	#N/A	0
hsa-miR-502-5p				0	#N/A	#N/A	#N/A	#N/A	#N/A	0	#N/A	#N/A	0	0	#N/A	#N/A	0	0	#N/A	#N/A	0	0	#N/A	#N/A	0	0	#N/A	#N/A	0	0	#N/A	#N/A	0
hsa-miR-639				0	#N/A	#N/A	#N/A	#N/A	#N/A	0	#N/A	#N/A	0	0	#N/A	#N/A	0	0	#N/A	#N/A	0	0	#N/A	#N/A	0	0	#N/A	#N/A	0	0	#N/A	#N/A	0
hsa-miR-4790-5p				0	#N/A	#N/A	#N/A	#N/A	#N/A	0	#N/A	#N/A	0	0	#N/A	#N/A	0	0	#N/A	#N/A	0	0	#N/A	#N/A	0	0	#N/A	#N/A	0	0	#N/A	#N/A	0
hsa-miR-425-3p				0.333333	-1.38125	-0.465975	0.789286	0.96669	1	1	#N/A	#N/A	27.9497	0	#N/A	#N/A	0	0	#N/A	#N/A	0	0	#N/A	#N/A	0	1	#N/A	#N/A	19.4098	0	#N/A	#N/A	0
hsa-miR-3181				0	#N/A	#N/A	#N/A	#N/A	#N/A	0	#N/A	#N/A	0	0	#N/A	#N/A	0	0	#N/A	#N/A	0	0	#N/A	#N/A	0	0	#N/A	#N/A	0	0	#N/A	#N/A	0
hsa-miR-517a-3p				0	#N/A	#N/A	#N/A	#N/A	#N/A	0	#N/A	#N/A	0	0	#N/A	#N/A	0	0	#N/A	#N/A	0	0	#N/A	#N/A	0	0	#N/A	#N/A	0	0	#N/A	#N/A	0
hsa-miR-517c-3p				0	#N/A	#N/A	#N/A	#N/A	#N/A	0	#N/A	#N/A	0	0	#N/A	#N/A	0	0	#N/A	#N/A	0	0	#N/A	#N/A	0	0	#N/A	#N/A	0	0	#N/A	#N/A	0
hsa-miR-4799-5p				0	#N/A	#N/A	#N/A	#N/A	#N/A	0	#N/A	#N/A	0	0	#N/A	#N/A	0	0	#N/A	#N/A	0	0	#N/A	#N/A	0	0	#N/A	#N/A	0	0	#N/A	#N/A	0
hsa-miR-4256				0	#N/A	#N/A	#N/A	#N/A	#N/A	0	#N/A	#N/A	0	0	#N/A	#N/A	0	0	#N/A	#N/A	0	0	#N/A	#N/A	0	0	#N/A	#N/A	0	0	#N/A	#N/A	0
hsa-miR-4727-5p				0	#N/A	#N/A	#N/A	#N/A	#N/A	0	#N/A	#N/A	0	0	#N/A	#N/A	0	0	#N/A	#N/A	0	0	#N/A	#N/A	0	0	#N/A	#N/A	0	0	#N/A	#N/A	0
hsa-miR-6828-3p				0	#N/A	#N/A	#N/A	#N/A	#N/A	0	#N/A	#N/A	0	0	#N/A	#N/A	0	0	#N/A	#N/A	0	0	#N/A	#N/A	0	0	#N/A	#N/A	0	0	#N/A	#N/A	0
hsa-miR-516b-5p				0	#N/A	#N/A	#N/A	#N/A	#N/A	0	#N/A	#N/A	0	0	#N/A	#N/A	0	0	#N/A	#N/A	0	0	#N/A	#N/A	0	0	#N/A	#N/A	0	0	#N/A	#N/A	0
hsa-miR-3686				0	#N/A	#N/A	#N/A	#N/A	#N/A	0	#N/A	#N/A	0	0	#N/A	#N/A	0	0	#N/A	#N/A	0	0	#N/A	#N/A	0	0	#N/A	#N/A	0	0	#N/A	#N/A	0
hsa-miR-6888-3p				0	#N/A	#N/A	#N/A	#N/A	#N/A	0	#N/A	#N/A	0	0	#N/A	#N/A	0	0	#N/A	#N/A	0	0	#N/A	#N/A	0	0	#N/A	#N/A	0	0	#N/A	#N/A	0
hsa-miR-7843-3p				0	#N/A	#N/A	#N/A	#N/A	#N/A	0	#N/A	#N/A	0	0	#N/A	#N/A	0	0	#N/A	#N/A	0	0	#N/A	#N/A	0	0	#N/A	#N/A	0	0	#N/A	#N/A	0
hsa-miR-3616-5p				0	#N/A	#N/A	#N/A	#N/A	#N/A	0	#N/A	#N/A	0	0	#N/A	#N/A	0	0	#N/A	#N/A	0	0	#N/A	#N/A	0	0	#N/A	#N/A	0	0	#N/A	#N/A	0
hsa-miR-215-5p				0	#N/A	#N/A	#N/A	#N/A	#N/A	0	#N/A	#N/A	0	0	#N/A	#N/A	0	0	#N/A	#N/A	0	0	#N/A	#N/A	0	0	#N/A	#N/A	0	0	#N/A	#N/A	0
hsa-miR-3672				0	#N/A	#N/A	#N/A	#N/A	#N/A	0	#N/A	#N/A	0	0	#N/A	#N/A	0	0	#N/A	#N/A	0	0	#N/A	#N/A	0	0	#N/A	#N/A	0	0	#N/A	#N/A	0
hsa-miR-5708				0	#N/A	#N/A	#N/A	#N/A	#N/A	0	#N/A	#N/A	0	0	#N/A	#N/A	0	0	#N/A	#N/A	0	0	#N/A	#N/A	0	0	#N/A	#N/A	0	0	#N/A	#N/A	0
hsa-miR-640				0	#N/A	#N/A	#N/A	#N/A	#N/A	0	#N/A	#N/A	0	0	#N/A	#N/A	0	0	#N/A	#N/A	0	0	#N/A	#N/A	0	0	#N/A	#N/A	0	0	#N/A	#N/A	0
hsa-miR-500a-3p				0	#N/A	#N/A	#N/A	#N/A	#N/A	0	#N/A	#N/A	0	0	#N/A	#N/A	0	0	#N/A	#N/A	0	0	#N/A	#N/A	0	0	#N/A	#N/A	0	0	#N/A	#N/A	0
hsa-miR-6811-5p				0	#N/A	#N/A	#N/A	#N/A	#N/A	0	#N/A	#N/A	0	0	#N/A	#N/A	0	0	#N/A	#N/A	0	0	#N/A	#N/A	0	0	#N/A	#N/A	0	0	#N/A	#N/A	0
hsa-miR-6836-3p				0	#N/A	#N/A	#N/A	#N/A	#N/A	0	#N/A	#N/A	0	0	#N/A	#N/A	0	0	#N/A	#N/A	0	0	#N/A	#N/A	0	0	#N/A	#N/A	0	0	#N/A	#N/A	0
hsa-miR-4737				0	#N/A	#N/A	#N/A	#N/A	#N/A	0	#N/A	#N/A	0	0	#N/A	#N/A	0	0	#N/A	#N/A	0	0	#N/A	#N/A	0	0	#N/A	#N/A	0	0	#N/A	#N/A	0
hsa-miR-4754				0	#N/A	#N/A	#N/A	#N/A	#N/A	0	#N/A	#N/A	0	0	#N/A	#N/A	0	0	#N/A	#N/A	0	0	#N/A	#N/A	0	0	#N/A	#N/A	0	0	#N/A	#N/A	0
hsa-miR-5089-3p				0	#N/A	#N/A	#N/A	#N/A	#N/A	0	#N/A	#N/A	0	0	#N/A	#N/A	0	0	#N/A	#N/A	0	0	#N/A	#N/A	0	0	#N/A	#N/A	0	0	#N/A	#N/A	0
hsa-miR-628-5p				0	#N/A	#N/A	#N/A	#N/A	#N/A	0	#N/A	#N/A	0	0	#N/A	#N/A	0	0	#N/A	#N/A	0	0	#N/A	#N/A	0	0	#N/A	#N/A	0	0	#N/A	#N/A	0
hsa-miR-4531				0	#N/A	#N/A	#N/A	#N/A	#N/A	0	#N/A	#N/A	0	0	#N/A	#N/A	0	0	#N/A	#N/A	0	0	#N/A	#N/A	0	0	#N/A	#N/A	0	0	#N/A	#N/A	0
hsa-miR-620				0	#N/A	#N/A	#N/A	#N/A	#N/A	0	#N/A	#N/A	0	0	#N/A	#N/A	0	0	#N/A	#N/A	0	0	#N/A	#N/A	0	0	#N/A	#N/A	0	0	#N/A	#N/A	0
hsa-miR-6874-5p				0	#N/A	#N/A	#N/A	#N/A	#N/A	0	#N/A	#N/A	0	0	#N/A	#N/A	0	0	#N/A	#N/A	0	0	#N/A	#N/A	0	0	#N/A	#N/A	0	0	#N/A	#N/A	0
hsa-miR-1261				0	#N/A	#N/A	#N/A	#N/A	#N/A	0	#N/A	#N/A	0	0	#N/A	#N/A	0	0	#N/A	#N/A	0	0	#N/A	#N/A	0	0	#N/A	#N/A	0	0	#N/A	#N/A	0
hsa-miR-4642				0	#N/A	#N/A	#N/A	#N/A	#N/A	0	#N/A	#N/A	0	0	#N/A	#N/A	0	0	#N/A	#N/A	0	0	#N/A	#N/A	0	0	#N/A	#N/A	0	0	#N/A	#N/A	0
hsa-miR-548s				0	#N/A	#N/A	#N/A	#N/A	#N/A	0	#N/A	#N/A	0	0	#N/A	#N/A	0	0	#N/A	#N/A	0	0	#N/A	#N/A	0	0	#N/A	#N/A	0	0	#N/A	#N/A	0
hsa-miR-4435				0	#N/A	#N/A	#N/A	#N/A	#N/A	0	#N/A	#N/A	0	0	#N/A	#N/A	0	0	#N/A	#N/A	0	0	#N/A	#N/A	0	0	#N/A	#N/A	0	0	#N/A	#N/A	0
hsa-miR-6810-5p				0	#N/A	#N/A	#N/A	#N/A	#N/A	0	#N/A	#N/A	0	0	#N/A	#N/A	0	0	#N/A	#N/A	0	0	#N/A	#N/A	0	0	#N/A	#N/A	0	0	#N/A	#N/A	0
hsa-miR-6812-5p				0	#N/A	#N/A	#N/A	#N/A	#N/A	0	#N/A	#N/A	0	0	#N/A	#N/A	0	0	#N/A	#N/A	0	0	#N/A	#N/A	0	0	#N/A	#N/A	0	0	#N/A	#N/A	0
hsa-miR-1262				0	#N/A	#N/A	#N/A	#N/A	#N/A	0	#N/A	#N/A	0	0	#N/A	#N/A	0	0	#N/A	#N/A	0	0	#N/A	#N/A	0	0	#N/A	#N/A	0	0	#N/A	#N/A	0
hsa-miR-4701-3p				0	#N/A	#N/A	#N/A	#N/A	#N/A	0	#N/A	#N/A	0	0	#N/A	#N/A	0	0	#N/A	#N/A	0	0	#N/A	#N/A	0	0	#N/A	#N/A	0	0	#N/A	#N/A	0
hsa-miR-1263				0	#N/A	#N/A	#N/A	#N/A	#N/A	0	#N/A	#N/A	0	0	#N/A	#N/A	0	0	#N/A	#N/A	0	0	#N/A	#N/A	0	0	#N/A	#N/A	0	0	#N/A	#N/A	0
hsa-miR-5587-5p				0	#N/A	#N/A	#N/A	#N/A	#N/A	0	#N/A	#N/A	0	0	#N/A	#N/A	0	0	#N/A	#N/A	0	0	#N/A	#N/A	0	0	#N/A	#N/A	0	0	#N/A	#N/A	0
hsa-miR-6843-3p				0	#N/A	#N/A	#N/A	#N/A	#N/A	0	#N/A	#N/A	0	0	#N/A	#N/A	0	0	#N/A	#N/A	0	0	#N/A	#N/A	0	0	#N/A	#N/A	0	0	#N/A	#N/A	0
hsa-miR-218-1-3p				0	#N/A	#N/A	#N/A	#N/A	#N/A	0	#N/A	#N/A	0	0	#N/A	#N/A	0	0	#N/A	#N/A	0	0	#N/A	#N/A	0	0	#N/A	#N/A	0	0	#N/A	#N/A	0
hsa-miR-135a-2-3p				0	#N/A	#N/A	#N/A	#N/A	#N/A	0	#N/A	#N/A	0	0	#N/A	#N/A	0	0	#N/A	#N/A	0	0	#N/A	#N/A	0	0	#N/A	#N/A	0	0	#N/A	#N/A	0
hsa-miR-135b-3p				0	#N/A	#N/A	#N/A	#N/A	#N/A	0	#N/A	#N/A	0	0	#N/A	#N/A	0	0	#N/A	#N/A	0	0	#N/A	#N/A	0	0	#N/A	#N/A	0	0	#N/A	#N/A	0
hsa-miR-568				0	#N/A	#N/A	#N/A	#N/A	#N/A	0	#N/A	#N/A	0	0	#N/A	#N/A	0	0	#N/A	#N/A	0	0	#N/A	#N/A	0	0	#N/A	#N/A	0	0	#N/A	#N/A	0
hsa-miR-297				0	#N/A	#N/A	#N/A	#N/A	#N/A	0	#N/A	#N/A	0	0	#N/A	#N/A	0	0	#N/A	#N/A	0	0	#N/A	#N/A	0	0	#N/A	#N/A	0	0	#N/A	#N/A	0
hsa-miR-10395-3p				0	#N/A	#N/A	#N/A	#N/A	#N/A	0	#N/A	#N/A	0	0	#N/A	#N/A	0	0	#N/A	#N/A	0	0	#N/A	#N/A	0	0	#N/A	#N/A	0	0	#N/A	#N/A	0
hsa-miR-3912-5p				0	#N/A	#N/A	#N/A	#N/A	#N/A	0	#N/A	#N/A	0	0	#N/A	#N/A	0	0	#N/A	#N/A	0	0	#N/A	#N/A	0	0	#N/A	#N/A	0	0	#N/A	#N/A	0
hsa-miR-4433b-5p				0	#N/A	#N/A	#N/A	#N/A	#N/A	0	#N/A	#N/A	0	0	#N/A	#N/A	0	0	#N/A	#N/A	0	0	#N/A	#N/A	0	0	#N/A	#N/A	0	0	#N/A	#N/A	0
hsa-miR-8070				0	#N/A	#N/A	#N/A	#N/A	#N/A	0	#N/A	#N/A	0	0	#N/A	#N/A	0	0	#N/A	#N/A	0	0	#N/A	#N/A	0	0	#N/A	#N/A	0	0	#N/A	#N/A	0
hsa-miR-550b-2-5p				0	#N/A	#N/A	#N/A	#N/A	#N/A	0	#N/A	#N/A	0	0	#N/A	#N/A	0	0	#N/A	#N/A	0	0	#N/A	#N/A	0	0	#N/A	#N/A	0	0	#N/A	#N/A	0
hsa-miR-4296				0	#N/A	#N/A	#N/A	#N/A	#N/A	0	#N/A	#N/A	0	0	#N/A	#N/A	0	0	#N/A	#N/A	0	0	#N/A	#N/A	0	0	#N/A	#N/A	0	0	#N/A	#N/A	0
hsa-miR-4477b				0	#N/A	#N/A	#N/A	#N/A	#N/A	0	#N/A	#N/A	0	0	#N/A	#N/A	0	0	#N/A	#N/A	0	0	#N/A	#N/A	0	0	#N/A	#N/A	0	0	#N/A	#N/A	0
hsa-miR-6509-5p				0	#N/A	#N/A	#N/A	#N/A	#N/A	0	#N/A	#N/A	0	0	#N/A	#N/A	0	0	#N/A	#N/A	0	0	#N/A	#N/A	0	0	#N/A	#N/A	0	0	#N/A	#N/A	0
hsa-miR-384				0	#N/A	#N/A	#N/A	#N/A	#N/A	0	#N/A	#N/A	0	0	#N/A	#N/A	0	0	#N/A	#N/A	0	0	#N/A	#N/A	0	0	#N/A	#N/A	0	0	#N/A	#N/A	0
hsa-miR-4263				0	#N/A	#N/A	#N/A	#N/A	#N/A	0	#N/A	#N/A	0	0	#N/A	#N/A	0	0	#N/A	#N/A	0	0	#N/A	#N/A	0	0	#N/A	#N/A	0	0	#N/A	#N/A	0
hsa-miR-576-5p				0.333333	-5.81155	-2.53892	0.373246	#N/A	1	1	#N/A	#N/A	27.9497	0	#N/A	#N/A	0	0	#N/A	#N/A	0	0	#N/A	#N/A	0	0	#N/A	#N/A	0	0	#N/A	#N/A	0
hsa-miR-4768-5p				0	#N/A	#N/A	#N/A	#N/A	#N/A	0	#N/A	#N/A	0	0	#N/A	#N/A	0	0	#N/A	#N/A	0	0	#N/A	#N/A	0	0	#N/A	#N/A	0	0	#N/A	#N/A	0
hsa-miR-544a				0	#N/A	#N/A	#N/A	#N/A	#N/A	0	#N/A	#N/A	0	0	#N/A	#N/A	0	0	#N/A	#N/A	0	0	#N/A	#N/A	0	0	#N/A	#N/A	0	0	#N/A	#N/A	0
hsa-miR-6875-3p				0	#N/A	#N/A	#N/A	#N/A	#N/A	0	#N/A	#N/A	0	0	#N/A	#N/A	0	0	#N/A	#N/A	0	0	#N/A	#N/A	0	0	#N/A	#N/A	0	0	#N/A	#N/A	0
hsa-miR-510-3p				0	#N/A	#N/A	#N/A	#N/A	#N/A	0	#N/A	#N/A	0	0	#N/A	#N/A	0	0	#N/A	#N/A	0	0	#N/A	#N/A	0	0	#N/A	#N/A	0	0	#N/A	#N/A	0
hsa-miR-514b-3p				0	#N/A	#N/A	#N/A	#N/A	#N/A	0	#N/A	#N/A	0	0	#N/A	#N/A	0	0	#N/A	#N/A	0	0	#N/A	#N/A	0	0	#N/A	#N/A	0	0	#N/A	#N/A	0
hsa-miR-514a-3p				0	#N/A	#N/A	#N/A	#N/A	#N/A	0	#N/A	#N/A	0	0	#N/A	#N/A	0	0	#N/A	#N/A	0	0	#N/A	#N/A	0	0	#N/A	#N/A	0	0	#N/A	#N/A	0
hsa-miR-4774-3p				0	#N/A	#N/A	#N/A	#N/A	#N/A	0	#N/A	#N/A	0	0	#N/A	#N/A	0	0	#N/A	#N/A	0	0	#N/A	#N/A	0	0	#N/A	#N/A	0	0	#N/A	#N/A	0
hsa-miR-3152-5p				0	#N/A	#N/A	#N/A	#N/A	#N/A	0	#N/A	#N/A	0	0	#N/A	#N/A	0	0	#N/A	#N/A	0	0	#N/A	#N/A	0	0	#N/A	#N/A	0	0	#N/A	#N/A	0
hsa-miR-4529-3p				0	#N/A	#N/A	#N/A	#N/A	#N/A	0	#N/A	#N/A	0	0	#N/A	#N/A	0	0	#N/A	#N/A	0	0	#N/A	#N/A	0	0	#N/A	#N/A	0	0	#N/A	#N/A	0
hsa-miR-450a-1-3p				0	#N/A	#N/A	#N/A	#N/A	#N/A	0	#N/A	#N/A	0	0	#N/A	#N/A	0	0	#N/A	#N/A	0	0	#N/A	#N/A	0	0	#N/A	#N/A	0	0	#N/A	#N/A	0
hsa-miR-450a-2-3p				0	#N/A	#N/A	#N/A	#N/A	#N/A	0	#N/A	#N/A	0	0	#N/A	#N/A	0	0	#N/A	#N/A	0	0	#N/A	#N/A	0	0	#N/A	#N/A	0	0	#N/A	#N/A	0
hsa-miR-3674				0	#N/A	#N/A	#N/A	#N/A	#N/A	0	#N/A	#N/A	0	0	#N/A	#N/A	0	0	#N/A	#N/A	0	0	#N/A	#N/A	0	0	#N/A	#N/A	0	0	#N/A	#N/A	0
hsa-miR-4646-3p				0	#N/A	#N/A	#N/A	#N/A	#N/A	0	#N/A	#N/A	0	0	#N/A	#N/A	0	0	#N/A	#N/A	0	0	#N/A	#N/A	0	0	#N/A	#N/A	0	0	#N/A	#N/A	0
hsa-miR-2355-3p				0	#N/A	#N/A	#N/A	#N/A	#N/A	0	#N/A	#N/A	0	0	#N/A	#N/A	0	0	#N/A	#N/A	0	0	#N/A	#N/A	0	0	#N/A	#N/A	0	0	#N/A	#N/A	0
hsa-miR-6739-3p				0	#N/A	#N/A	#N/A	#N/A	#N/A	0	#N/A	#N/A	0	0	#N/A	#N/A	0	0	#N/A	#N/A	0	0	#N/A	#N/A	0	0	#N/A	#N/A	0	0	#N/A	#N/A	0
hsa-miR-4446-5p				0	#N/A	#N/A	#N/A	#N/A	#N/A	0	#N/A	#N/A	0	0	#N/A	#N/A	0	0	#N/A	#N/A	0	0	#N/A	#N/A	0	0	#N/A	#N/A	0	0	#N/A	#N/A	0
hsa-miR-2113				0	#N/A	#N/A	#N/A	#N/A	#N/A	0	#N/A	#N/A	0	0	#N/A	#N/A	0	0	#N/A	#N/A	0	0	#N/A	#N/A	0	0	#N/A	#N/A	0	0	#N/A	#N/A	0
hsa-miR-548d-3p				0	#N/A	#N/A	#N/A	#N/A	#N/A	0	#N/A	#N/A	0	0	#N/A	#N/A	0	0	#N/A	#N/A	0	0	#N/A	#N/A	0	0	#N/A	#N/A	0	0	#N/A	#N/A	0
hsa-miR-548bb-3p				0	#N/A	#N/A	#N/A	#N/A	#N/A	0	#N/A	#N/A	0	0	#N/A	#N/A	0	0	#N/A	#N/A	0	0	#N/A	#N/A	0	0	#N/A	#N/A	0	0	#N/A	#N/A	0
hsa-miR-548h-3p				0	#N/A	#N/A	#N/A	#N/A	#N/A	0	#N/A	#N/A	0	0	#N/A	#N/A	0	0	#N/A	#N/A	0	0	#N/A	#N/A	0	0	#N/A	#N/A	0	0	#N/A	#N/A	0
hsa-miR-548ac				0	#N/A	#N/A	#N/A	#N/A	#N/A	0	#N/A	#N/A	0	0	#N/A	#N/A	0	0	#N/A	#N/A	0	0	#N/A	#N/A	0	0	#N/A	#N/A	0	0	#N/A	#N/A	0
hsa-miR-548ae-3p				0	#N/A	#N/A	#N/A	#N/A	#N/A	0	#N/A	#N/A	0	0	#N/A	#N/A	0	0	#N/A	#N/A	0	0	#N/A	#N/A	0	0	#N/A	#N/A	0	0	#N/A	#N/A	0
hsa-miR-548aq-3p				0	#N/A	#N/A	#N/A	#N/A	#N/A	0	#N/A	#N/A	0	0	#N/A	#N/A	0	0	#N/A	#N/A	0	0	#N/A	#N/A	0	0	#N/A	#N/A	0	0	#N/A	#N/A	0
hsa-miR-548ah-3p				0	#N/A	#N/A	#N/A	#N/A	#N/A	0	#N/A	#N/A	0	0	#N/A	#N/A	0	0	#N/A	#N/A	0	0	#N/A	#N/A	0	0	#N/A	#N/A	0	0	#N/A	#N/A	0
hsa-miR-548am-3p				0	#N/A	#N/A	#N/A	#N/A	#N/A	0	#N/A	#N/A	0	0	#N/A	#N/A	0	0	#N/A	#N/A	0	0	#N/A	#N/A	0	0	#N/A	#N/A	0	0	#N/A	#N/A	0
hsa-miR-548j-3p				0	#N/A	#N/A	#N/A	#N/A	#N/A	0	#N/A	#N/A	0	0	#N/A	#N/A	0	0	#N/A	#N/A	0	0	#N/A	#N/A	0	0	#N/A	#N/A	0	0	#N/A	#N/A	0
hsa-miR-548c-3p				0	#N/A	#N/A	#N/A	#N/A	#N/A	0	#N/A	#N/A	0	0	#N/A	#N/A	0	0	#N/A	#N/A	0	0	#N/A	#N/A	0	0	#N/A	#N/A	0	0	#N/A	#N/A	0
hsa-miR-548at-3p				0	#N/A	#N/A	#N/A	#N/A	#N/A	0	#N/A	#N/A	0	0	#N/A	#N/A	0	0	#N/A	#N/A	0	0	#N/A	#N/A	0	0	#N/A	#N/A	0	0	#N/A	#N/A	0
hsa-miR-548ay-3p				0	#N/A	#N/A	#N/A	#N/A	#N/A	0	#N/A	#N/A	0	0	#N/A	#N/A	0	0	#N/A	#N/A	0	0	#N/A	#N/A	0	0	#N/A	#N/A	0	0	#N/A	#N/A	0
hsa-miR-424-3p				1	-1.87259	-0.905033	0.609365	0.933495	1	2	#N/A	#N/A	55.8994	0	#N/A	#N/A	0	1	#N/A	#N/A	35.6651	2	#N/A	#N/A	83.5592	0	#N/A	#N/A	0	0	#N/A	#N/A	0
hsa-miR-548a-3p				0	#N/A	#N/A	#N/A	#N/A	#N/A	0	#N/A	#N/A	0	0	#N/A	#N/A	0	0	#N/A	#N/A	0	0	#N/A	#N/A	0	0	#N/A	#N/A	0	0	#N/A	#N/A	0
hsa-miR-548e-5p				0	#N/A	#N/A	#N/A	#N/A	#N/A	0	#N/A	#N/A	0	0	#N/A	#N/A	0	0	#N/A	#N/A	0	0	#N/A	#N/A	0	0	#N/A	#N/A	0	0	#N/A	#N/A	0
hsa-miR-548n				0	#N/A	#N/A	#N/A	#N/A	#N/A	0	#N/A	#N/A	0	0	#N/A	#N/A	0	0	#N/A	#N/A	0	0	#N/A	#N/A	0	0	#N/A	#N/A	0	0	#N/A	#N/A	0
hsa-miR-548t-5p				0	#N/A	#N/A	#N/A	#N/A	#N/A	0	#N/A	#N/A	0	0	#N/A	#N/A	0	0	#N/A	#N/A	0	0	#N/A	#N/A	0	0	#N/A	#N/A	0	0	#N/A	#N/A	0
hsa-miR-548az-5p				0	#N/A	#N/A	#N/A	#N/A	#N/A	0	#N/A	#N/A	0	0	#N/A	#N/A	0	0	#N/A	#N/A	0	0	#N/A	#N/A	0	0	#N/A	#N/A	0	0	#N/A	#N/A	0
hsa-miR-497-3p				0	#N/A	#N/A	#N/A	#N/A	#N/A	0	#N/A	#N/A	0	0	#N/A	#N/A	0	0	#N/A	#N/A	0	0	#N/A	#N/A	0	0	#N/A	#N/A	0	0	#N/A	#N/A	0
hsa-miR-6771-3p				0	#N/A	#N/A	#N/A	#N/A	#N/A	0	#N/A	#N/A	0	0	#N/A	#N/A	0	0	#N/A	#N/A	0	0	#N/A	#N/A	0	0	#N/A	#N/A	0	0	#N/A	#N/A	0
hsa-miR-186-5p				0	#N/A	#N/A	#N/A	#N/A	#N/A	0	#N/A	#N/A	0	0	#N/A	#N/A	0	0	#N/A	#N/A	0	0	#N/A	#N/A	0	0	#N/A	#N/A	0	0	#N/A	#N/A	0
hsa-miR-548u				0	#N/A	#N/A	#N/A	#N/A	#N/A	0	#N/A	#N/A	0	0	#N/A	#N/A	0	0	#N/A	#N/A	0	0	#N/A	#N/A	0	0	#N/A	#N/A	0	0	#N/A	#N/A	0
hsa-miR-583				0	#N/A	#N/A	#N/A	#N/A	#N/A	0	#N/A	#N/A	0	0	#N/A	#N/A	0	0	#N/A	#N/A	0	0	#N/A	#N/A	0	0	#N/A	#N/A	0	0	#N/A	#N/A	0
hsa-miR-518b				0	#N/A	#N/A	#N/A	#N/A	#N/A	0	#N/A	#N/A	0	0	#N/A	#N/A	0	0	#N/A	#N/A	0	0	#N/A	#N/A	0	0	#N/A	#N/A	0	0	#N/A	#N/A	0
hsa-miR-518d-3p				0	#N/A	#N/A	#N/A	#N/A	#N/A	0	#N/A	#N/A	0	0	#N/A	#N/A	0	0	#N/A	#N/A	0	0	#N/A	#N/A	0	0	#N/A	#N/A	0	0	#N/A	#N/A	0
hsa-miR-518c-3p				0	#N/A	#N/A	#N/A	#N/A	#N/A	0	#N/A	#N/A	0	0	#N/A	#N/A	0	0	#N/A	#N/A	0	0	#N/A	#N/A	0	0	#N/A	#N/A	0	0	#N/A	#N/A	0
hsa-miR-6768-3p				0	#N/A	#N/A	#N/A	#N/A	#N/A	0	#N/A	#N/A	0	0	#N/A	#N/A	0	0	#N/A	#N/A	0	0	#N/A	#N/A	0	0	#N/A	#N/A	0	0	#N/A	#N/A	0
hsa-miR-548m				0	#N/A	#N/A	#N/A	#N/A	#N/A	0	#N/A	#N/A	0	0	#N/A	#N/A	0	0	#N/A	#N/A	0	0	#N/A	#N/A	0	0	#N/A	#N/A	0	0	#N/A	#N/A	0
hsa-miR-6507-3p				0	#N/A	#N/A	#N/A	#N/A	#N/A	0	#N/A	#N/A	0	0	#N/A	#N/A	0	0	#N/A	#N/A	0	0	#N/A	#N/A	0	0	#N/A	#N/A	0	0	#N/A	#N/A	0
hsa-miR-3609				0	#N/A	#N/A	#N/A	#N/A	#N/A	0	#N/A	#N/A	0	0	#N/A	#N/A	0	0	#N/A	#N/A	0	0	#N/A	#N/A	0	0	#N/A	#N/A	0	0	#N/A	#N/A	0
hsa-miR-519d-3p				0	#N/A	#N/A	#N/A	#N/A	#N/A	0	#N/A	#N/A	0	0	#N/A	#N/A	0	0	#N/A	#N/A	0	0	#N/A	#N/A	0	0	#N/A	#N/A	0	0	#N/A	#N/A	0
hsa-miR-20b-5p				0	#N/A	#N/A	#N/A	#N/A	#N/A	0	#N/A	#N/A	0	0	#N/A	#N/A	0	0	#N/A	#N/A	0	0	#N/A	#N/A	0	0	#N/A	#N/A	0	0	#N/A	#N/A	0
hsa-miR-93-5p				35.3333	-16.8756	-4.07687	0.094807	0.470766	1	4	#N/A	#N/A	111.799	0	#N/A	#N/A	0	102	#N/A	#N/A	3637.84	5	#N/A	#N/A	208.898	0	#N/A	#N/A	0	0	#N/A	#N/A	0
hsa-miR-17-5p				0	#N/A	#N/A	#N/A	#N/A	#N/A	0	#N/A	#N/A	0	0	#N/A	#N/A	0	0	#N/A	#N/A	0	0	#N/A	#N/A	0	0	#N/A	#N/A	0	0	#N/A	#N/A	0
hsa-miR-561-3p				0	#N/A	#N/A	#N/A	#N/A	#N/A	0	#N/A	#N/A	0	0	#N/A	#N/A	0	0	#N/A	#N/A	0	0	#N/A	#N/A	0	0	#N/A	#N/A	0	0	#N/A	#N/A	0
hsa-miR-5692a				0	#N/A	#N/A	#N/A	#N/A	#N/A	0	#N/A	#N/A	0	0	#N/A	#N/A	0	0	#N/A	#N/A	0	0	#N/A	#N/A	0	0	#N/A	#N/A	0	0	#N/A	#N/A	0
hsa-miR-1252-3p				0	#N/A	#N/A	#N/A	#N/A	#N/A	0	#N/A	#N/A	0	0	#N/A	#N/A	0	0	#N/A	#N/A	0	0	#N/A	#N/A	0	0	#N/A	#N/A	0	0	#N/A	#N/A	0
hsa-miR-4694-3p				0	#N/A	#N/A	#N/A	#N/A	#N/A	0	#N/A	#N/A	0	0	#N/A	#N/A	0	0	#N/A	#N/A	0	0	#N/A	#N/A	0	0	#N/A	#N/A	0	0	#N/A	#N/A	0
hsa-miR-10a-3p				0	#N/A	#N/A	#N/A	#N/A	#N/A	0	#N/A	#N/A	0	0	#N/A	#N/A	0	0	#N/A	#N/A	0	0	#N/A	#N/A	0	0	#N/A	#N/A	0	0	#N/A	#N/A	0
hsa-miR-7-1-3p				0.666667	-9.85151	-3.30035	0.229555	0.651646	1	2	#N/A	#N/A	55.8994	0	#N/A	#N/A	0	0	#N/A	#N/A	0	0	#N/A	#N/A	0	0	#N/A	#N/A	0	0	#N/A	#N/A	0
hsa-miR-7-2-3p				0	#N/A	#N/A	#N/A	#N/A	#N/A	0	#N/A	#N/A	0	0	#N/A	#N/A	0	0	#N/A	#N/A	0	0	#N/A	#N/A	0	0	#N/A	#N/A	0	0	#N/A	#N/A	0
hsa-miR-196a-1-3p				0	#N/A	#N/A	#N/A	#N/A	#N/A	0	#N/A	#N/A	0	0	#N/A	#N/A	0	0	#N/A	#N/A	0	0	#N/A	#N/A	0	0	#N/A	#N/A	0	0	#N/A	#N/A	0
hsa-miR-21-3p				0.333333	2.37647	1.24882	0.624194	#N/A	1	0	#N/A	#N/A	0	0	#N/A	#N/A	0	0	#N/A	#N/A	0	1	#N/A	#N/A	41.7796	0	#N/A	#N/A	0	0	#N/A	#N/A	0
hsa-miR-6776-3p				0	#N/A	#N/A	#N/A	#N/A	#N/A	0	#N/A	#N/A	0	0	#N/A	#N/A	0	0	#N/A	#N/A	0	0	#N/A	#N/A	0	0	#N/A	#N/A	0	0	#N/A	#N/A	0
hsa-miR-652-5p				0	#N/A	#N/A	#N/A	#N/A	#N/A	0	#N/A	#N/A	0	0	#N/A	#N/A	0	0	#N/A	#N/A	0	0	#N/A	#N/A	0	0	#N/A	#N/A	0	0	#N/A	#N/A	0
hsa-miR-3150a-5p				0	#N/A	#N/A	#N/A	#N/A	#N/A	0	#N/A	#N/A	0	0	#N/A	#N/A	0	0	#N/A	#N/A	0	0	#N/A	#N/A	0	0	#N/A	#N/A	0	0	#N/A	#N/A	0
hsa-miR-3150b-5p				0	#N/A	#N/A	#N/A	#N/A	#N/A	0	#N/A	#N/A	0	0	#N/A	#N/A	0	0	#N/A	#N/A	0	0	#N/A	#N/A	0	0	#N/A	#N/A	0	0	#N/A	#N/A	0
hsa-miR-490-3p				0	#N/A	#N/A	#N/A	#N/A	#N/A	0	#N/A	#N/A	0	0	#N/A	#N/A	0	0	#N/A	#N/A	0	0	#N/A	#N/A	0	0	#N/A	#N/A	0	0	#N/A	#N/A	0
hsa-miR-191-5p				7.66667	-1.4908	-0.576088	0.781629	0.96669	1	21	#N/A	#N/A	586.944	0	#N/A	#N/A	0	2	#N/A	#N/A	71.3302	10	#N/A	#N/A	417.796	0	#N/A	#N/A	0	1	#N/A	#N/A	135.262
hsa-miR-708-3p				0	#N/A	#N/A	#N/A	#N/A	#N/A	0	#N/A	#N/A	0	0	#N/A	#N/A	0	0	#N/A	#N/A	0	0	#N/A	#N/A	0	0	#N/A	#N/A	0	0	#N/A	#N/A	0
hsa-miR-548b-3p				0	#N/A	#N/A	#N/A	#N/A	#N/A	0	#N/A	#N/A	0	0	#N/A	#N/A	0	0	#N/A	#N/A	0	0	#N/A	#N/A	0	0	#N/A	#N/A	0	0	#N/A	#N/A	0
hsa-miR-7109-3p				0	#N/A	#N/A	#N/A	#N/A	#N/A	0	#N/A	#N/A	0	0	#N/A	#N/A	0	0	#N/A	#N/A	0	0	#N/A	#N/A	0	0	#N/A	#N/A	0	0	#N/A	#N/A	0
hsa-miR-99a-3p				0	#N/A	#N/A	#N/A	#N/A	#N/A	0	#N/A	#N/A	0	0	#N/A	#N/A	0	0	#N/A	#N/A	0	0	#N/A	#N/A	0	0	#N/A	#N/A	0	0	#N/A	#N/A	0
hsa-miR-99b-3p				0.333333	-5.81155	-2.53892	0.373246	#N/A	1	1	#N/A	#N/A	27.9497	0	#N/A	#N/A	0	0	#N/A	#N/A	0	0	#N/A	#N/A	0	0	#N/A	#N/A	0	0	#N/A	#N/A	0
hsa-miR-100-3p				0	#N/A	#N/A	#N/A	#N/A	#N/A	0	#N/A	#N/A	0	0	#N/A	#N/A	0	0	#N/A	#N/A	0	0	#N/A	#N/A	0	0	#N/A	#N/A	0	0	#N/A	#N/A	0
hsa-miR-4428				0	#N/A	#N/A	#N/A	#N/A	#N/A	0	#N/A	#N/A	0	0	#N/A	#N/A	0	0	#N/A	#N/A	0	0	#N/A	#N/A	0	0	#N/A	#N/A	0	0	#N/A	#N/A	0
hsa-miR-12118				0	#N/A	#N/A	#N/A	#N/A	#N/A	0	#N/A	#N/A	0	0	#N/A	#N/A	0	0	#N/A	#N/A	0	0	#N/A	#N/A	0	0	#N/A	#N/A	0	0	#N/A	#N/A	0
hsa-miR-4753-5p				0	#N/A	#N/A	#N/A	#N/A	#N/A	0	#N/A	#N/A	0	0	#N/A	#N/A	0	0	#N/A	#N/A	0	0	#N/A	#N/A	0	0	#N/A	#N/A	0	0	#N/A	#N/A	0
hsa-miR-4475				0	#N/A	#N/A	#N/A	#N/A	#N/A	0	#N/A	#N/A	0	0	#N/A	#N/A	0	0	#N/A	#N/A	0	0	#N/A	#N/A	0	0	#N/A	#N/A	0	0	#N/A	#N/A	0
hsa-miR-1264				0	#N/A	#N/A	#N/A	#N/A	#N/A	0	#N/A	#N/A	0	0	#N/A	#N/A	0	0	#N/A	#N/A	0	0	#N/A	#N/A	0	0	#N/A	#N/A	0	0	#N/A	#N/A	0
hsa-miR-34b-3p				0	#N/A	#N/A	#N/A	#N/A	#N/A	0	#N/A	#N/A	0	0	#N/A	#N/A	0	0	#N/A	#N/A	0	0	#N/A	#N/A	0	0	#N/A	#N/A	0	0	#N/A	#N/A	0
hsa-miR-34a-3p				0	#N/A	#N/A	#N/A	#N/A	#N/A	0	#N/A	#N/A	0	0	#N/A	#N/A	0	0	#N/A	#N/A	0	0	#N/A	#N/A	0	0	#N/A	#N/A	0	0	#N/A	#N/A	0
hsa-miR-5197-5p				0	#N/A	#N/A	#N/A	#N/A	#N/A	0	#N/A	#N/A	0	0	#N/A	#N/A	0	0	#N/A	#N/A	0	0	#N/A	#N/A	0	0	#N/A	#N/A	0	0	#N/A	#N/A	0
hsa-miR-8066				0	#N/A	#N/A	#N/A	#N/A	#N/A	0	#N/A	#N/A	0	0	#N/A	#N/A	0	0	#N/A	#N/A	0	0	#N/A	#N/A	0	0	#N/A	#N/A	0	0	#N/A	#N/A	0
hsa-miR-33a-3p				0	#N/A	#N/A	#N/A	#N/A	#N/A	0	#N/A	#N/A	0	0	#N/A	#N/A	0	0	#N/A	#N/A	0	0	#N/A	#N/A	0	0	#N/A	#N/A	0	0	#N/A	#N/A	0
hsa-miR-5571-5p				0	#N/A	#N/A	#N/A	#N/A	#N/A	0	#N/A	#N/A	0	0	#N/A	#N/A	0	0	#N/A	#N/A	0	0	#N/A	#N/A	0	0	#N/A	#N/A	0	0	#N/A	#N/A	0
hsa-miR-32-3p				0	#N/A	#N/A	#N/A	#N/A	#N/A	0	#N/A	#N/A	0	0	#N/A	#N/A	0	0	#N/A	#N/A	0	0	#N/A	#N/A	0	0	#N/A	#N/A	0	0	#N/A	#N/A	0
hsa-miR-624-3p				0	#N/A	#N/A	#N/A	#N/A	#N/A	0	#N/A	#N/A	0	0	#N/A	#N/A	0	0	#N/A	#N/A	0	0	#N/A	#N/A	0	0	#N/A	#N/A	0	0	#N/A	#N/A	0
hsa-miR-4731-3p				0	#N/A	#N/A	#N/A	#N/A	#N/A	0	#N/A	#N/A	0	0	#N/A	#N/A	0	0	#N/A	#N/A	0	0	#N/A	#N/A	0	0	#N/A	#N/A	0	0	#N/A	#N/A	0
hsa-miR-8485				0	#N/A	#N/A	#N/A	#N/A	#N/A	0	#N/A	#N/A	0	0	#N/A	#N/A	0	0	#N/A	#N/A	0	0	#N/A	#N/A	0	0	#N/A	#N/A	0	0	#N/A	#N/A	0
hsa-miR-603				0	#N/A	#N/A	#N/A	#N/A	#N/A	0	#N/A	#N/A	0	0	#N/A	#N/A	0	0	#N/A	#N/A	0	0	#N/A	#N/A	0	0	#N/A	#N/A	0	0	#N/A	#N/A	0
hsa-miR-6768-5p				0	#N/A	#N/A	#N/A	#N/A	#N/A	0	#N/A	#N/A	0	0	#N/A	#N/A	0	0	#N/A	#N/A	0	0	#N/A	#N/A	0	0	#N/A	#N/A	0	0	#N/A	#N/A	0
hsa-miR-4789-3p				0	#N/A	#N/A	#N/A	#N/A	#N/A	0	#N/A	#N/A	0	0	#N/A	#N/A	0	0	#N/A	#N/A	0	0	#N/A	#N/A	0	0	#N/A	#N/A	0	0	#N/A	#N/A	0
hsa-miR-3120-3p				0	#N/A	#N/A	#N/A	#N/A	#N/A	0	#N/A	#N/A	0	0	#N/A	#N/A	0	0	#N/A	#N/A	0	0	#N/A	#N/A	0	0	#N/A	#N/A	0	0	#N/A	#N/A	0
hsa-miR-4700-3p				0	#N/A	#N/A	#N/A	#N/A	#N/A	0	#N/A	#N/A	0	0	#N/A	#N/A	0	0	#N/A	#N/A	0	0	#N/A	#N/A	0	0	#N/A	#N/A	0	0	#N/A	#N/A	0
hsa-miR-4438				0	#N/A	#N/A	#N/A	#N/A	#N/A	0	#N/A	#N/A	0	0	#N/A	#N/A	0	0	#N/A	#N/A	0	0	#N/A	#N/A	0	0	#N/A	#N/A	0	0	#N/A	#N/A	0
hsa-miR-5580-3p				0	#N/A	#N/A	#N/A	#N/A	#N/A	0	#N/A	#N/A	0	0	#N/A	#N/A	0	0	#N/A	#N/A	0	0	#N/A	#N/A	0	0	#N/A	#N/A	0	0	#N/A	#N/A	0
hsa-miR-942-3p				0	#N/A	#N/A	#N/A	#N/A	#N/A	0	#N/A	#N/A	0	0	#N/A	#N/A	0	0	#N/A	#N/A	0	0	#N/A	#N/A	0	0	#N/A	#N/A	0	0	#N/A	#N/A	0
hsa-miR-323a-3p				56.3333	72.888	6.18761	0.0356848	0.343683	1	2	#N/A	#N/A	55.8994	0	#N/A	#N/A	0	0	#N/A	#N/A	0	169	#N/A	#N/A	7060.75	0	#N/A	#N/A	0	0	#N/A	#N/A	0
hsa-miR-1911-3p				0	#N/A	#N/A	#N/A	#N/A	#N/A	0	#N/A	#N/A	0	0	#N/A	#N/A	0	0	#N/A	#N/A	0	0	#N/A	#N/A	0	0	#N/A	#N/A	0	0	#N/A	#N/A	0
hsa-miR-6753-5p				0	#N/A	#N/A	#N/A	#N/A	#N/A	0	#N/A	#N/A	0	0	#N/A	#N/A	0	0	#N/A	#N/A	0	0	#N/A	#N/A	0	0	#N/A	#N/A	0	0	#N/A	#N/A	0
hsa-miR-7153-3p				0	#N/A	#N/A	#N/A	#N/A	#N/A	0	#N/A	#N/A	0	0	#N/A	#N/A	0	0	#N/A	#N/A	0	0	#N/A	#N/A	0	0	#N/A	#N/A	0	0	#N/A	#N/A	0
hsa-miR-1295b-5p				0	#N/A	#N/A	#N/A	#N/A	#N/A	0	#N/A	#N/A	0	0	#N/A	#N/A	0	0	#N/A	#N/A	0	0	#N/A	#N/A	0	0	#N/A	#N/A	0	0	#N/A	#N/A	0
hsa-miR-4640-3p				0	#N/A	#N/A	#N/A	#N/A	#N/A	0	#N/A	#N/A	0	0	#N/A	#N/A	0	0	#N/A	#N/A	0	0	#N/A	#N/A	0	0	#N/A	#N/A	0	0	#N/A	#N/A	0
hsa-miR-941				21	130.209	7.02468	0.0395279	0.343683	1	0	#N/A	#N/A	0	0	#N/A	#N/A	0	0	#N/A	#N/A	0	63	#N/A	#N/A	2632.12	0	#N/A	#N/A	0	0	#N/A	#N/A	0
hsa-miR-99b-5p				86.6667	7.55636	2.91769	0.134396	0.601882	1	18	#N/A	#N/A	503.094	1	#N/A	#N/A	511.083	3	#N/A	#N/A	106.995	97	#N/A	#N/A	4052.62	160	#N/A	#N/A	3105.57	3	#N/A	#N/A	405.786
hsa-miR-6510-3p				0	#N/A	#N/A	#N/A	#N/A	#N/A	0	#N/A	#N/A	0	0	#N/A	#N/A	0	0	#N/A	#N/A	0	0	#N/A	#N/A	0	0	#N/A	#N/A	0	0	#N/A	#N/A	0
hsa-miR-4655-5p				0	#N/A	#N/A	#N/A	#N/A	#N/A	0	#N/A	#N/A	0	0	#N/A	#N/A	0	0	#N/A	#N/A	0	0	#N/A	#N/A	0	0	#N/A	#N/A	0	0	#N/A	#N/A	0
hsa-miR-6800-3p				0	#N/A	#N/A	#N/A	#N/A	#N/A	0	#N/A	#N/A	0	0	#N/A	#N/A	0	0	#N/A	#N/A	0	0	#N/A	#N/A	0	0	#N/A	#N/A	0	0	#N/A	#N/A	0
hsa-miR-3200-3p				0	#N/A	#N/A	#N/A	#N/A	#N/A	0	#N/A	#N/A	0	0	#N/A	#N/A	0	0	#N/A	#N/A	0	0	#N/A	#N/A	0	0	#N/A	#N/A	0	0	#N/A	#N/A	0
hsa-miR-6782-3p				0	#N/A	#N/A	#N/A	#N/A	#N/A	0	#N/A	#N/A	0	0	#N/A	#N/A	0	0	#N/A	#N/A	0	0	#N/A	#N/A	0	0	#N/A	#N/A	0	0	#N/A	#N/A	0
hsa-miR-574-3p				95	1.11869	0.161809	0.929977	0.977494	1	12	#N/A	#N/A	335.396	1	#N/A	#N/A	511.083	160	#N/A	#N/A	5706.42	85	#N/A	#N/A	3551.27	199	#N/A	#N/A	3862.56	1	#N/A	#N/A	135.262
hsa-miR-4445-3p				0	#N/A	#N/A	#N/A	#N/A	#N/A	0	#N/A	#N/A	0	0	#N/A	#N/A	0	0	#N/A	#N/A	0	0	#N/A	#N/A	0	0	#N/A	#N/A	0	0	#N/A	#N/A	0
hsa-miR-28-3p				31	65.2648	6.02823	0.0408302	0.343683	1	1	#N/A	#N/A	27.9497	0	#N/A	#N/A	0	0	#N/A	#N/A	0	92	#N/A	#N/A	3843.72	0	#N/A	#N/A	0	1	#N/A	#N/A	135.262
hsa-miR-512-5p				0	#N/A	#N/A	#N/A	#N/A	#N/A	0	#N/A	#N/A	0	0	#N/A	#N/A	0	0	#N/A	#N/A	0	0	#N/A	#N/A	0	0	#N/A	#N/A	0	0	#N/A	#N/A	0
hsa-miR-4418				0	#N/A	#N/A	#N/A	#N/A	#N/A	0	#N/A	#N/A	0	0	#N/A	#N/A	0	0	#N/A	#N/A	0	0	#N/A	#N/A	0	0	#N/A	#N/A	0	0	#N/A	#N/A	0
hsa-miR-6807-3p				0	#N/A	#N/A	#N/A	#N/A	#N/A	0	#N/A	#N/A	0	0	#N/A	#N/A	0	0	#N/A	#N/A	0	0	#N/A	#N/A	0	0	#N/A	#N/A	0	0	#N/A	#N/A	0
hsa-miR-892b				0	#N/A	#N/A	#N/A	#N/A	#N/A	0	#N/A	#N/A	0	0	#N/A	#N/A	0	0	#N/A	#N/A	0	0	#N/A	#N/A	0	0	#N/A	#N/A	0	0	#N/A	#N/A	0
hsa-miR-1183				0	#N/A	#N/A	#N/A	#N/A	#N/A	0	#N/A	#N/A	0	0	#N/A	#N/A	0	0	#N/A	#N/A	0	0	#N/A	#N/A	0	0	#N/A	#N/A	0	0	#N/A	#N/A	0
hsa-miR-4318				0	#N/A	#N/A	#N/A	#N/A	#N/A	0	#N/A	#N/A	0	0	#N/A	#N/A	0	0	#N/A	#N/A	0	0	#N/A	#N/A	0	0	#N/A	#N/A	0	0	#N/A	#N/A	0
hsa-miR-892a				0	#N/A	#N/A	#N/A	#N/A	#N/A	0	#N/A	#N/A	0	0	#N/A	#N/A	0	0	#N/A	#N/A	0	0	#N/A	#N/A	0	0	#N/A	#N/A	0	0	#N/A	#N/A	0
hsa-miR-4676-3p				0	#N/A	#N/A	#N/A	#N/A	#N/A	0	#N/A	#N/A	0	0	#N/A	#N/A	0	0	#N/A	#N/A	0	0	#N/A	#N/A	0	0	#N/A	#N/A	0	0	#N/A	#N/A	0
hsa-miR-892c-3p				0	#N/A	#N/A	#N/A	#N/A	#N/A	0	#N/A	#N/A	0	0	#N/A	#N/A	0	0	#N/A	#N/A	0	0	#N/A	#N/A	0	0	#N/A	#N/A	0	0	#N/A	#N/A	0
hsa-miR-374c-3p				0	#N/A	#N/A	#N/A	#N/A	#N/A	0	#N/A	#N/A	0	0	#N/A	#N/A	0	0	#N/A	#N/A	0	0	#N/A	#N/A	0	0	#N/A	#N/A	0	0	#N/A	#N/A	0
hsa-miR-4773				0	#N/A	#N/A	#N/A	#N/A	#N/A	0	#N/A	#N/A	0	0	#N/A	#N/A	0	0	#N/A	#N/A	0	0	#N/A	#N/A	0	0	#N/A	#N/A	0	0	#N/A	#N/A	0
hsa-miR-3154				0	#N/A	#N/A	#N/A	#N/A	#N/A	0	#N/A	#N/A	0	0	#N/A	#N/A	0	0	#N/A	#N/A	0	0	#N/A	#N/A	0	0	#N/A	#N/A	0	0	#N/A	#N/A	0
hsa-miR-3123				0	#N/A	#N/A	#N/A	#N/A	#N/A	0	#N/A	#N/A	0	0	#N/A	#N/A	0	0	#N/A	#N/A	0	0	#N/A	#N/A	0	0	#N/A	#N/A	0	0	#N/A	#N/A	0
hsa-miR-6873-5p				0	#N/A	#N/A	#N/A	#N/A	#N/A	0	#N/A	#N/A	0	0	#N/A	#N/A	0	0	#N/A	#N/A	0	0	#N/A	#N/A	0	0	#N/A	#N/A	0	0	#N/A	#N/A	0
hsa-miR-5586-3p				0	#N/A	#N/A	#N/A	#N/A	#N/A	0	#N/A	#N/A	0	0	#N/A	#N/A	0	0	#N/A	#N/A	0	0	#N/A	#N/A	0	0	#N/A	#N/A	0	0	#N/A	#N/A	0
hsa-miR-5694				0	#N/A	#N/A	#N/A	#N/A	#N/A	0	#N/A	#N/A	0	0	#N/A	#N/A	0	0	#N/A	#N/A	0	0	#N/A	#N/A	0	0	#N/A	#N/A	0	0	#N/A	#N/A	0
hsa-miR-6871-3p				0	#N/A	#N/A	#N/A	#N/A	#N/A	0	#N/A	#N/A	0	0	#N/A	#N/A	0	0	#N/A	#N/A	0	0	#N/A	#N/A	0	0	#N/A	#N/A	0	0	#N/A	#N/A	0
hsa-miR-424-5p				2	-2.64691	-1.40431	0.549992	0.870316	1	6	#N/A	#N/A	167.698	0	#N/A	#N/A	0	0	#N/A	#N/A	0	2	#N/A	#N/A	83.5592	0	#N/A	#N/A	0	0	#N/A	#N/A	0
hsa-miR-497-5p				0	#N/A	#N/A	#N/A	#N/A	#N/A	0	#N/A	#N/A	0	0	#N/A	#N/A	0	0	#N/A	#N/A	0	0	#N/A	#N/A	0	0	#N/A	#N/A	0	0	#N/A	#N/A	0
hsa-miR-6165				0	#N/A	#N/A	#N/A	#N/A	#N/A	0	#N/A	#N/A	0	0	#N/A	#N/A	0	0	#N/A	#N/A	0	0	#N/A	#N/A	0	0	#N/A	#N/A	0	0	#N/A	#N/A	0
hsa-miR-6510-5p				0	#N/A	#N/A	#N/A	#N/A	#N/A	0	#N/A	#N/A	0	0	#N/A	#N/A	0	0	#N/A	#N/A	0	0	#N/A	#N/A	0	0	#N/A	#N/A	0	0	#N/A	#N/A	0
hsa-miR-4274				0	#N/A	#N/A	#N/A	#N/A	#N/A	0	#N/A	#N/A	0	0	#N/A	#N/A	0	0	#N/A	#N/A	0	0	#N/A	#N/A	0	0	#N/A	#N/A	0	0	#N/A	#N/A	0
hsa-miR-4519				0	#N/A	#N/A	#N/A	#N/A	#N/A	0	#N/A	#N/A	0	0	#N/A	#N/A	0	0	#N/A	#N/A	0	0	#N/A	#N/A	0	0	#N/A	#N/A	0	0	#N/A	#N/A	0
hsa-miR-449b-3p				0	#N/A	#N/A	#N/A	#N/A	#N/A	0	#N/A	#N/A	0	0	#N/A	#N/A	0	0	#N/A	#N/A	0	0	#N/A	#N/A	0	0	#N/A	#N/A	0	0	#N/A	#N/A	0
hsa-miR-6858-3p				0	#N/A	#N/A	#N/A	#N/A	#N/A	0	#N/A	#N/A	0	0	#N/A	#N/A	0	0	#N/A	#N/A	0	0	#N/A	#N/A	0	0	#N/A	#N/A	0	0	#N/A	#N/A	0
hsa-miR-4323				0	#N/A	#N/A	#N/A	#N/A	#N/A	0	#N/A	#N/A	0	0	#N/A	#N/A	0	0	#N/A	#N/A	0	0	#N/A	#N/A	0	0	#N/A	#N/A	0	0	#N/A	#N/A	0
hsa-miR-3940-3p				0	#N/A	#N/A	#N/A	#N/A	#N/A	0	#N/A	#N/A	0	0	#N/A	#N/A	0	0	#N/A	#N/A	0	0	#N/A	#N/A	0	0	#N/A	#N/A	0	0	#N/A	#N/A	0
hsa-miR-4687-5p				0	#N/A	#N/A	#N/A	#N/A	#N/A	0	#N/A	#N/A	0	0	#N/A	#N/A	0	0	#N/A	#N/A	0	0	#N/A	#N/A	0	0	#N/A	#N/A	0	0	#N/A	#N/A	0
hsa-miR-6746-3p				0	#N/A	#N/A	#N/A	#N/A	#N/A	0	#N/A	#N/A	0	0	#N/A	#N/A	0	0	#N/A	#N/A	0	0	#N/A	#N/A	0	0	#N/A	#N/A	0	0	#N/A	#N/A	0
hsa-miR-6877-3p				0	#N/A	#N/A	#N/A	#N/A	#N/A	0	#N/A	#N/A	0	0	#N/A	#N/A	0	0	#N/A	#N/A	0	0	#N/A	#N/A	0	0	#N/A	#N/A	0	0	#N/A	#N/A	0
hsa-miR-4293				0	#N/A	#N/A	#N/A	#N/A	#N/A	0	#N/A	#N/A	0	0	#N/A	#N/A	0	0	#N/A	#N/A	0	0	#N/A	#N/A	0	0	#N/A	#N/A	0	0	#N/A	#N/A	0
hsa-miR-7846-3p				0	#N/A	#N/A	#N/A	#N/A	#N/A	0	#N/A	#N/A	0	0	#N/A	#N/A	0	0	#N/A	#N/A	0	0	#N/A	#N/A	0	0	#N/A	#N/A	0	0	#N/A	#N/A	0
hsa-miR-6876-5p				0	#N/A	#N/A	#N/A	#N/A	#N/A	0	#N/A	#N/A	0	0	#N/A	#N/A	0	0	#N/A	#N/A	0	0	#N/A	#N/A	0	0	#N/A	#N/A	0	0	#N/A	#N/A	0
hsa-miR-4476				0	#N/A	#N/A	#N/A	#N/A	#N/A	0	#N/A	#N/A	0	0	#N/A	#N/A	0	0	#N/A	#N/A	0	0	#N/A	#N/A	0	0	#N/A	#N/A	0	0	#N/A	#N/A	0
hsa-miR-8083				0	#N/A	#N/A	#N/A	#N/A	#N/A	0	#N/A	#N/A	0	0	#N/A	#N/A	0	0	#N/A	#N/A	0	0	#N/A	#N/A	0	0	#N/A	#N/A	0	0	#N/A	#N/A	0
hsa-miR-4695-5p				0	#N/A	#N/A	#N/A	#N/A	#N/A	0	#N/A	#N/A	0	0	#N/A	#N/A	0	0	#N/A	#N/A	0	0	#N/A	#N/A	0	0	#N/A	#N/A	0	0	#N/A	#N/A	0
hsa-miR-4433b-3p				0	#N/A	#N/A	#N/A	#N/A	#N/A	0	#N/A	#N/A	0	0	#N/A	#N/A	0	0	#N/A	#N/A	0	0	#N/A	#N/A	0	0	#N/A	#N/A	0	0	#N/A	#N/A	0
hsa-miR-4661-3p				0	#N/A	#N/A	#N/A	#N/A	#N/A	0	#N/A	#N/A	0	0	#N/A	#N/A	0	0	#N/A	#N/A	0	0	#N/A	#N/A	0	0	#N/A	#N/A	0	0	#N/A	#N/A	0
hsa-miR-10524-5p				0	#N/A	#N/A	#N/A	#N/A	#N/A	0	#N/A	#N/A	0	0	#N/A	#N/A	0	0	#N/A	#N/A	0	0	#N/A	#N/A	0	0	#N/A	#N/A	0	0	#N/A	#N/A	0
hsa-miR-1265				0	#N/A	#N/A	#N/A	#N/A	#N/A	0	#N/A	#N/A	0	0	#N/A	#N/A	0	0	#N/A	#N/A	0	0	#N/A	#N/A	0	0	#N/A	#N/A	0	0	#N/A	#N/A	0
hsa-miR-3622a-5p				0	#N/A	#N/A	#N/A	#N/A	#N/A	0	#N/A	#N/A	0	0	#N/A	#N/A	0	0	#N/A	#N/A	0	0	#N/A	#N/A	0	0	#N/A	#N/A	0	0	#N/A	#N/A	0
hsa-miR-6511a-5p				0	#N/A	#N/A	#N/A	#N/A	#N/A	0	#N/A	#N/A	0	0	#N/A	#N/A	0	0	#N/A	#N/A	0	0	#N/A	#N/A	0	0	#N/A	#N/A	0	0	#N/A	#N/A	0
hsa-miR-6808-5p				0	#N/A	#N/A	#N/A	#N/A	#N/A	0	#N/A	#N/A	0	0	#N/A	#N/A	0	0	#N/A	#N/A	0	0	#N/A	#N/A	0	0	#N/A	#N/A	0	0	#N/A	#N/A	0
hsa-miR-6893-5p				0	#N/A	#N/A	#N/A	#N/A	#N/A	0	#N/A	#N/A	0	0	#N/A	#N/A	0	0	#N/A	#N/A	0	0	#N/A	#N/A	0	0	#N/A	#N/A	0	0	#N/A	#N/A	0
hsa-miR-2682-5p				0	#N/A	#N/A	#N/A	#N/A	#N/A	0	#N/A	#N/A	0	0	#N/A	#N/A	0	0	#N/A	#N/A	0	0	#N/A	#N/A	0	0	#N/A	#N/A	0	0	#N/A	#N/A	0
hsa-miR-15a-3p				0	#N/A	#N/A	#N/A	#N/A	#N/A	0	#N/A	#N/A	0	0	#N/A	#N/A	0	0	#N/A	#N/A	0	0	#N/A	#N/A	0	0	#N/A	#N/A	0	0	#N/A	#N/A	0
hsa-miR-3186-5p				0	#N/A	#N/A	#N/A	#N/A	#N/A	0	#N/A	#N/A	0	0	#N/A	#N/A	0	0	#N/A	#N/A	0	0	#N/A	#N/A	0	0	#N/A	#N/A	0	0	#N/A	#N/A	0
hsa-miR-5584-5p				0	#N/A	#N/A	#N/A	#N/A	#N/A	0	#N/A	#N/A	0	0	#N/A	#N/A	0	0	#N/A	#N/A	0	0	#N/A	#N/A	0	0	#N/A	#N/A	0	0	#N/A	#N/A	0
hsa-miR-6750-5p				0	#N/A	#N/A	#N/A	#N/A	#N/A	0	#N/A	#N/A	0	0	#N/A	#N/A	0	0	#N/A	#N/A	0	0	#N/A	#N/A	0	0	#N/A	#N/A	0	0	#N/A	#N/A	0
hsa-miR-6822-5p				0	#N/A	#N/A	#N/A	#N/A	#N/A	0	#N/A	#N/A	0	0	#N/A	#N/A	0	0	#N/A	#N/A	0	0	#N/A	#N/A	0	0	#N/A	#N/A	0	0	#N/A	#N/A	0
hsa-miR-6760-5p				0	#N/A	#N/A	#N/A	#N/A	#N/A	0	#N/A	#N/A	0	0	#N/A	#N/A	0	0	#N/A	#N/A	0	0	#N/A	#N/A	0	0	#N/A	#N/A	0	0	#N/A	#N/A	0
hsa-miR-4756-5p				0	#N/A	#N/A	#N/A	#N/A	#N/A	0	#N/A	#N/A	0	0	#N/A	#N/A	0	0	#N/A	#N/A	0	0	#N/A	#N/A	0	0	#N/A	#N/A	0	0	#N/A	#N/A	0
hsa-miR-1321				0	#N/A	#N/A	#N/A	#N/A	#N/A	0	#N/A	#N/A	0	0	#N/A	#N/A	0	0	#N/A	#N/A	0	0	#N/A	#N/A	0	0	#N/A	#N/A	0	0	#N/A	#N/A	0
hsa-miR-6735-5p				0	#N/A	#N/A	#N/A	#N/A	#N/A	0	#N/A	#N/A	0	0	#N/A	#N/A	0	0	#N/A	#N/A	0	0	#N/A	#N/A	0	0	#N/A	#N/A	0	0	#N/A	#N/A	0
hsa-miR-4436b-3p				0	#N/A	#N/A	#N/A	#N/A	#N/A	0	#N/A	#N/A	0	0	#N/A	#N/A	0	0	#N/A	#N/A	0	0	#N/A	#N/A	0	0	#N/A	#N/A	0	0	#N/A	#N/A	0
hsa-miR-6879-5p				0	#N/A	#N/A	#N/A	#N/A	#N/A	0	#N/A	#N/A	0	0	#N/A	#N/A	0	0	#N/A	#N/A	0	0	#N/A	#N/A	0	0	#N/A	#N/A	0	0	#N/A	#N/A	0
hsa-miR-6895-5p				0	#N/A	#N/A	#N/A	#N/A	#N/A	0	#N/A	#N/A	0	0	#N/A	#N/A	0	0	#N/A	#N/A	0	0	#N/A	#N/A	0	0	#N/A	#N/A	0	0	#N/A	#N/A	0
hsa-miR-7160-3p				0	#N/A	#N/A	#N/A	#N/A	#N/A	0	#N/A	#N/A	0	0	#N/A	#N/A	0	0	#N/A	#N/A	0	0	#N/A	#N/A	0	0	#N/A	#N/A	0	0	#N/A	#N/A	0
hsa-miR-4512				0	#N/A	#N/A	#N/A	#N/A	#N/A	0	#N/A	#N/A	0	0	#N/A	#N/A	0	0	#N/A	#N/A	0	0	#N/A	#N/A	0	0	#N/A	#N/A	0	0	#N/A	#N/A	0
hsa-miR-5088-5p				0	#N/A	#N/A	#N/A	#N/A	#N/A	0	#N/A	#N/A	0	0	#N/A	#N/A	0	0	#N/A	#N/A	0	0	#N/A	#N/A	0	0	#N/A	#N/A	0	0	#N/A	#N/A	0
hsa-miR-4446-3p				0	#N/A	#N/A	#N/A	#N/A	#N/A	0	#N/A	#N/A	0	0	#N/A	#N/A	0	0	#N/A	#N/A	0	0	#N/A	#N/A	0	0	#N/A	#N/A	0	0	#N/A	#N/A	0
hsa-miR-6813-5p				0	#N/A	#N/A	#N/A	#N/A	#N/A	0	#N/A	#N/A	0	0	#N/A	#N/A	0	0	#N/A	#N/A	0	0	#N/A	#N/A	0	0	#N/A	#N/A	0	0	#N/A	#N/A	0
hsa-miR-6794-5p				0	#N/A	#N/A	#N/A	#N/A	#N/A	0	#N/A	#N/A	0	0	#N/A	#N/A	0	0	#N/A	#N/A	0	0	#N/A	#N/A	0	0	#N/A	#N/A	0	0	#N/A	#N/A	0
hsa-miR-1178-5p				0	#N/A	#N/A	#N/A	#N/A	#N/A	0	#N/A	#N/A	0	0	#N/A	#N/A	0	0	#N/A	#N/A	0	0	#N/A	#N/A	0	0	#N/A	#N/A	0	0	#N/A	#N/A	0
hsa-miR-3927-3p				0	#N/A	#N/A	#N/A	#N/A	#N/A	0	#N/A	#N/A	0	0	#N/A	#N/A	0	0	#N/A	#N/A	0	0	#N/A	#N/A	0	0	#N/A	#N/A	0	0	#N/A	#N/A	0
hsa-miR-370-5p				0	#N/A	#N/A	#N/A	#N/A	#N/A	0	#N/A	#N/A	0	0	#N/A	#N/A	0	0	#N/A	#N/A	0	0	#N/A	#N/A	0	0	#N/A	#N/A	0	0	#N/A	#N/A	0
hsa-miR-431-3p				0	#N/A	#N/A	#N/A	#N/A	#N/A	0	#N/A	#N/A	0	0	#N/A	#N/A	0	0	#N/A	#N/A	0	0	#N/A	#N/A	0	0	#N/A	#N/A	0	0	#N/A	#N/A	0
hsa-miR-12114				0	#N/A	#N/A	#N/A	#N/A	#N/A	0	#N/A	#N/A	0	0	#N/A	#N/A	0	0	#N/A	#N/A	0	0	#N/A	#N/A	0	0	#N/A	#N/A	0	0	#N/A	#N/A	0
hsa-miR-802				0	#N/A	#N/A	#N/A	#N/A	#N/A	0	#N/A	#N/A	0	0	#N/A	#N/A	0	0	#N/A	#N/A	0	0	#N/A	#N/A	0	0	#N/A	#N/A	0	0	#N/A	#N/A	0
hsa-miR-8079				0	#N/A	#N/A	#N/A	#N/A	#N/A	0	#N/A	#N/A	0	0	#N/A	#N/A	0	0	#N/A	#N/A	0	0	#N/A	#N/A	0	0	#N/A	#N/A	0	0	#N/A	#N/A	0
hsa-miR-8062				0	#N/A	#N/A	#N/A	#N/A	#N/A	0	#N/A	#N/A	0	0	#N/A	#N/A	0	0	#N/A	#N/A	0	0	#N/A	#N/A	0	0	#N/A	#N/A	0	0	#N/A	#N/A	0
hsa-miR-3666				0	#N/A	#N/A	#N/A	#N/A	#N/A	0	#N/A	#N/A	0	0	#N/A	#N/A	0	0	#N/A	#N/A	0	0	#N/A	#N/A	0	0	#N/A	#N/A	0	0	#N/A	#N/A	0
hsa-miR-301a-3p				0	#N/A	#N/A	#N/A	#N/A	#N/A	0	#N/A	#N/A	0	0	#N/A	#N/A	0	0	#N/A	#N/A	0	0	#N/A	#N/A	0	0	#N/A	#N/A	0	0	#N/A	#N/A	0
hsa-miR-301b-3p				0	#N/A	#N/A	#N/A	#N/A	#N/A	0	#N/A	#N/A	0	0	#N/A	#N/A	0	0	#N/A	#N/A	0	0	#N/A	#N/A	0	0	#N/A	#N/A	0	0	#N/A	#N/A	0
hsa-miR-130b-3p				0	#N/A	#N/A	#N/A	#N/A	#N/A	0	#N/A	#N/A	0	0	#N/A	#N/A	0	0	#N/A	#N/A	0	0	#N/A	#N/A	0	0	#N/A	#N/A	0	0	#N/A	#N/A	0
hsa-miR-130a-3p				0	#N/A	#N/A	#N/A	#N/A	#N/A	0	#N/A	#N/A	0	0	#N/A	#N/A	0	0	#N/A	#N/A	0	0	#N/A	#N/A	0	0	#N/A	#N/A	0	0	#N/A	#N/A	0
hsa-miR-4295				0	#N/A	#N/A	#N/A	#N/A	#N/A	0	#N/A	#N/A	0	0	#N/A	#N/A	0	0	#N/A	#N/A	0	0	#N/A	#N/A	0	0	#N/A	#N/A	0	0	#N/A	#N/A	0
hsa-miR-33b-3p				0.333333	-5.81155	-2.53892	0.373246	#N/A	1	1	#N/A	#N/A	27.9497	0	#N/A	#N/A	0	0	#N/A	#N/A	0	0	#N/A	#N/A	0	0	#N/A	#N/A	0	0	#N/A	#N/A	0
hsa-miR-3677-5p				0	#N/A	#N/A	#N/A	#N/A	#N/A	0	#N/A	#N/A	0	0	#N/A	#N/A	0	0	#N/A	#N/A	0	0	#N/A	#N/A	0	0	#N/A	#N/A	0	0	#N/A	#N/A	0
hsa-miR-140-5p				0	#N/A	#N/A	#N/A	#N/A	#N/A	0	#N/A	#N/A	0	0	#N/A	#N/A	0	0	#N/A	#N/A	0	0	#N/A	#N/A	0	0	#N/A	#N/A	0	0	#N/A	#N/A	0
hsa-miR-4255				0	#N/A	#N/A	#N/A	#N/A	#N/A	0	#N/A	#N/A	0	0	#N/A	#N/A	0	0	#N/A	#N/A	0	0	#N/A	#N/A	0	0	#N/A	#N/A	0	0	#N/A	#N/A	0
hsa-miR-101-5p				0	#N/A	#N/A	#N/A	#N/A	#N/A	0	#N/A	#N/A	0	0	#N/A	#N/A	0	0	#N/A	#N/A	0	0	#N/A	#N/A	0	0	#N/A	#N/A	0	0	#N/A	#N/A	0
hsa-miR-5000-5p				0	#N/A	#N/A	#N/A	#N/A	#N/A	0	#N/A	#N/A	0	0	#N/A	#N/A	0	0	#N/A	#N/A	0	0	#N/A	#N/A	0	0	#N/A	#N/A	0	0	#N/A	#N/A	0
hsa-miR-6874-3p				0	#N/A	#N/A	#N/A	#N/A	#N/A	0	#N/A	#N/A	0	0	#N/A	#N/A	0	0	#N/A	#N/A	0	0	#N/A	#N/A	0	0	#N/A	#N/A	0	0	#N/A	#N/A	0
hsa-miR-4259				0	#N/A	#N/A	#N/A	#N/A	#N/A	0	#N/A	#N/A	0	0	#N/A	#N/A	0	0	#N/A	#N/A	0	0	#N/A	#N/A	0	0	#N/A	#N/A	0	0	#N/A	#N/A	0
hsa-miR-142-5p				0	#N/A	#N/A	#N/A	#N/A	#N/A	0	#N/A	#N/A	0	0	#N/A	#N/A	0	0	#N/A	#N/A	0	0	#N/A	#N/A	0	0	#N/A	#N/A	0	0	#N/A	#N/A	0
hsa-miR-4666a-3p				0	#N/A	#N/A	#N/A	#N/A	#N/A	0	#N/A	#N/A	0	0	#N/A	#N/A	0	0	#N/A	#N/A	0	0	#N/A	#N/A	0	0	#N/A	#N/A	0	0	#N/A	#N/A	0
hsa-miR-10397-3p				0	#N/A	#N/A	#N/A	#N/A	#N/A	0	#N/A	#N/A	0	0	#N/A	#N/A	0	0	#N/A	#N/A	0	0	#N/A	#N/A	0	0	#N/A	#N/A	0	0	#N/A	#N/A	0
hsa-miR-3651				0	#N/A	#N/A	#N/A	#N/A	#N/A	0	#N/A	#N/A	0	0	#N/A	#N/A	0	0	#N/A	#N/A	0	0	#N/A	#N/A	0	0	#N/A	#N/A	0	0	#N/A	#N/A	0
hsa-miR-2115-3p				0	#N/A	#N/A	#N/A	#N/A	#N/A	0	#N/A	#N/A	0	0	#N/A	#N/A	0	0	#N/A	#N/A	0	0	#N/A	#N/A	0	0	#N/A	#N/A	0	0	#N/A	#N/A	0
hsa-miR-3617-3p				0	#N/A	#N/A	#N/A	#N/A	#N/A	0	#N/A	#N/A	0	0	#N/A	#N/A	0	0	#N/A	#N/A	0	0	#N/A	#N/A	0	0	#N/A	#N/A	0	0	#N/A	#N/A	0
hsa-miR-217-3p				0	#N/A	#N/A	#N/A	#N/A	#N/A	0	#N/A	#N/A	0	0	#N/A	#N/A	0	0	#N/A	#N/A	0	0	#N/A	#N/A	0	0	#N/A	#N/A	0	0	#N/A	#N/A	0
hsa-miR-136-3p				0	#N/A	#N/A	#N/A	#N/A	#N/A	0	#N/A	#N/A	0	0	#N/A	#N/A	0	0	#N/A	#N/A	0	0	#N/A	#N/A	0	0	#N/A	#N/A	0	0	#N/A	#N/A	0
hsa-miR-188-5p				0	#N/A	#N/A	#N/A	#N/A	#N/A	0	#N/A	#N/A	0	0	#N/A	#N/A	0	0	#N/A	#N/A	0	0	#N/A	#N/A	0	0	#N/A	#N/A	0	0	#N/A	#N/A	0
hsa-miR-4800-3p				0	#N/A	#N/A	#N/A	#N/A	#N/A	0	#N/A	#N/A	0	0	#N/A	#N/A	0	0	#N/A	#N/A	0	0	#N/A	#N/A	0	0	#N/A	#N/A	0	0	#N/A	#N/A	0
hsa-miR-3675-3p				0	#N/A	#N/A	#N/A	#N/A	#N/A	0	#N/A	#N/A	0	0	#N/A	#N/A	0	0	#N/A	#N/A	0	0	#N/A	#N/A	0	0	#N/A	#N/A	0	0	#N/A	#N/A	0
hsa-miR-3126-3p				0	#N/A	#N/A	#N/A	#N/A	#N/A	0	#N/A	#N/A	0	0	#N/A	#N/A	0	0	#N/A	#N/A	0	0	#N/A	#N/A	0	0	#N/A	#N/A	0	0	#N/A	#N/A	0
hsa-miR-1298-3p				0	#N/A	#N/A	#N/A	#N/A	#N/A	0	#N/A	#N/A	0	0	#N/A	#N/A	0	0	#N/A	#N/A	0	0	#N/A	#N/A	0	0	#N/A	#N/A	0	0	#N/A	#N/A	0
hsa-miR-200a-5p				0	#N/A	#N/A	#N/A	#N/A	#N/A	0	#N/A	#N/A	0	0	#N/A	#N/A	0	0	#N/A	#N/A	0	0	#N/A	#N/A	0	0	#N/A	#N/A	0	0	#N/A	#N/A	0
hsa-miR-200b-5p				0	#N/A	#N/A	#N/A	#N/A	#N/A	0	#N/A	#N/A	0	0	#N/A	#N/A	0	0	#N/A	#N/A	0	0	#N/A	#N/A	0	0	#N/A	#N/A	0	0	#N/A	#N/A	0
hsa-miR-141-5p				0	#N/A	#N/A	#N/A	#N/A	#N/A	0	#N/A	#N/A	0	0	#N/A	#N/A	0	0	#N/A	#N/A	0	0	#N/A	#N/A	0	0	#N/A	#N/A	0	0	#N/A	#N/A	0
hsa-miR-4757-3p				0	#N/A	#N/A	#N/A	#N/A	#N/A	0	#N/A	#N/A	0	0	#N/A	#N/A	0	0	#N/A	#N/A	0	0	#N/A	#N/A	0	0	#N/A	#N/A	0	0	#N/A	#N/A	0
hsa-miR-532-5p				2	16.1105	4.00993	0.151823	0.620728	1	0	#N/A	#N/A	0	0	#N/A	#N/A	0	0	#N/A	#N/A	0	5	#N/A	#N/A	208.898	0	#N/A	#N/A	0	1	#N/A	#N/A	135.262
hsa-miR-3146				0	#N/A	#N/A	#N/A	#N/A	#N/A	0	#N/A	#N/A	0	0	#N/A	#N/A	0	0	#N/A	#N/A	0	0	#N/A	#N/A	0	0	#N/A	#N/A	0	0	#N/A	#N/A	0
hsa-miR-4728-3p				0	#N/A	#N/A	#N/A	#N/A	#N/A	0	#N/A	#N/A	0	0	#N/A	#N/A	0	0	#N/A	#N/A	0	0	#N/A	#N/A	0	0	#N/A	#N/A	0	0	#N/A	#N/A	0
hsa-miR-6871-5p				0	#N/A	#N/A	#N/A	#N/A	#N/A	0	#N/A	#N/A	0	0	#N/A	#N/A	0	0	#N/A	#N/A	0	0	#N/A	#N/A	0	0	#N/A	#N/A	0	0	#N/A	#N/A	0
hsa-miR-6890-5p				0	#N/A	#N/A	#N/A	#N/A	#N/A	0	#N/A	#N/A	0	0	#N/A	#N/A	0	0	#N/A	#N/A	0	0	#N/A	#N/A	0	0	#N/A	#N/A	0	0	#N/A	#N/A	0
hsa-miR-218-2-3p				0	#N/A	#N/A	#N/A	#N/A	#N/A	0	#N/A	#N/A	0	0	#N/A	#N/A	0	0	#N/A	#N/A	0	0	#N/A	#N/A	0	0	#N/A	#N/A	0	0	#N/A	#N/A	0
hsa-miR-6504-3p				0	#N/A	#N/A	#N/A	#N/A	#N/A	0	#N/A	#N/A	0	0	#N/A	#N/A	0	0	#N/A	#N/A	0	0	#N/A	#N/A	0	0	#N/A	#N/A	0	0	#N/A	#N/A	0
hsa-miR-126-5p				2	5.0423	2.33408	0.294079	0.694219	1	1	#N/A	#N/A	27.9497	0	#N/A	#N/A	0	0	#N/A	#N/A	0	5	#N/A	#N/A	208.898	0	#N/A	#N/A	0	1	#N/A	#N/A	135.262
hsa-miR-4272				0	#N/A	#N/A	#N/A	#N/A	#N/A	0	#N/A	#N/A	0	0	#N/A	#N/A	0	0	#N/A	#N/A	0	0	#N/A	#N/A	0	0	#N/A	#N/A	0	0	#N/A	#N/A	0
hsa-miR-25-3p				1.66667	1.2445	0.315567	0.86915	0.96669	1	5	#N/A	#N/A	139.748	0	#N/A	#N/A	0	0	#N/A	#N/A	0	4	#N/A	#N/A	167.118	0	#N/A	#N/A	0	1	#N/A	#N/A	135.262
hsa-miR-548o-3p				0	#N/A	#N/A	#N/A	#N/A	#N/A	0	#N/A	#N/A	0	0	#N/A	#N/A	0	0	#N/A	#N/A	0	0	#N/A	#N/A	0	0	#N/A	#N/A	0	0	#N/A	#N/A	0
hsa-miR-6715a-3p				0	#N/A	#N/A	#N/A	#N/A	#N/A	0	#N/A	#N/A	0	0	#N/A	#N/A	0	0	#N/A	#N/A	0	0	#N/A	#N/A	0	0	#N/A	#N/A	0	0	#N/A	#N/A	0
hsa-miR-4762-5p				0	#N/A	#N/A	#N/A	#N/A	#N/A	0	#N/A	#N/A	0	0	#N/A	#N/A	0	0	#N/A	#N/A	0	0	#N/A	#N/A	0	0	#N/A	#N/A	0	0	#N/A	#N/A	0
hsa-miR-4714-3p				0	#N/A	#N/A	#N/A	#N/A	#N/A	0	#N/A	#N/A	0	0	#N/A	#N/A	0	0	#N/A	#N/A	0	0	#N/A	#N/A	0	0	#N/A	#N/A	0	0	#N/A	#N/A	0
hsa-miR-6830-5p				0	#N/A	#N/A	#N/A	#N/A	#N/A	0	#N/A	#N/A	0	0	#N/A	#N/A	0	0	#N/A	#N/A	0	0	#N/A	#N/A	0	0	#N/A	#N/A	0	0	#N/A	#N/A	0
hsa-miR-16-2-3p				0	#N/A	#N/A	#N/A	#N/A	#N/A	0	#N/A	#N/A	0	0	#N/A	#N/A	0	0	#N/A	#N/A	0	0	#N/A	#N/A	0	0	#N/A	#N/A	0	0	#N/A	#N/A	0
hsa-miR-195-3p				0	#N/A	#N/A	#N/A	#N/A	#N/A	0	#N/A	#N/A	0	0	#N/A	#N/A	0	0	#N/A	#N/A	0	0	#N/A	#N/A	0	0	#N/A	#N/A	0	0	#N/A	#N/A	0
hsa-miR-4275				0	#N/A	#N/A	#N/A	#N/A	#N/A	0	#N/A	#N/A	0	0	#N/A	#N/A	0	0	#N/A	#N/A	0	0	#N/A	#N/A	0	0	#N/A	#N/A	0	0	#N/A	#N/A	0
hsa-miR-4733-3p				0	#N/A	#N/A	#N/A	#N/A	#N/A	0	#N/A	#N/A	0	0	#N/A	#N/A	0	0	#N/A	#N/A	0	0	#N/A	#N/A	0	0	#N/A	#N/A	0	0	#N/A	#N/A	0
hsa-miR-181d-3p				0	#N/A	#N/A	#N/A	#N/A	#N/A	0	#N/A	#N/A	0	0	#N/A	#N/A	0	0	#N/A	#N/A	0	0	#N/A	#N/A	0	0	#N/A	#N/A	0	0	#N/A	#N/A	0
hsa-miR-1306-5p				0	#N/A	#N/A	#N/A	#N/A	#N/A	0	#N/A	#N/A	0	0	#N/A	#N/A	0	0	#N/A	#N/A	0	0	#N/A	#N/A	0	0	#N/A	#N/A	0	0	#N/A	#N/A	0
hsa-miR-6767-3p				0	#N/A	#N/A	#N/A	#N/A	#N/A	0	#N/A	#N/A	0	0	#N/A	#N/A	0	0	#N/A	#N/A	0	0	#N/A	#N/A	0	0	#N/A	#N/A	0	0	#N/A	#N/A	0
hsa-miR-6890-3p				0	#N/A	#N/A	#N/A	#N/A	#N/A	0	#N/A	#N/A	0	0	#N/A	#N/A	0	0	#N/A	#N/A	0	0	#N/A	#N/A	0	0	#N/A	#N/A	0	0	#N/A	#N/A	0
hsa-miR-3614-5p				0	#N/A	#N/A	#N/A	#N/A	#N/A	0	#N/A	#N/A	0	0	#N/A	#N/A	0	0	#N/A	#N/A	0	0	#N/A	#N/A	0	0	#N/A	#N/A	0	0	#N/A	#N/A	0
hsa-miR-1324				0	#N/A	#N/A	#N/A	#N/A	#N/A	0	#N/A	#N/A	0	0	#N/A	#N/A	0	0	#N/A	#N/A	0	0	#N/A	#N/A	0	0	#N/A	#N/A	0	0	#N/A	#N/A	0
hsa-miR-4494				0	#N/A	#N/A	#N/A	#N/A	#N/A	0	#N/A	#N/A	0	0	#N/A	#N/A	0	0	#N/A	#N/A	0	0	#N/A	#N/A	0	0	#N/A	#N/A	0	0	#N/A	#N/A	0
hsa-miR-4756-3p				0	#N/A	#N/A	#N/A	#N/A	#N/A	0	#N/A	#N/A	0	0	#N/A	#N/A	0	0	#N/A	#N/A	0	0	#N/A	#N/A	0	0	#N/A	#N/A	0	0	#N/A	#N/A	0
hsa-miR-6501-3p				0	#N/A	#N/A	#N/A	#N/A	#N/A	0	#N/A	#N/A	0	0	#N/A	#N/A	0	0	#N/A	#N/A	0	0	#N/A	#N/A	0	0	#N/A	#N/A	0	0	#N/A	#N/A	0
hsa-miR-4257				0	#N/A	#N/A	#N/A	#N/A	#N/A	0	#N/A	#N/A	0	0	#N/A	#N/A	0	0	#N/A	#N/A	0	0	#N/A	#N/A	0	0	#N/A	#N/A	0	0	#N/A	#N/A	0
hsa-miR-4691-3p				0	#N/A	#N/A	#N/A	#N/A	#N/A	0	#N/A	#N/A	0	0	#N/A	#N/A	0	0	#N/A	#N/A	0	0	#N/A	#N/A	0	0	#N/A	#N/A	0	0	#N/A	#N/A	0
hsa-miR-4768-3p				0	#N/A	#N/A	#N/A	#N/A	#N/A	0	#N/A	#N/A	0	0	#N/A	#N/A	0	0	#N/A	#N/A	0	0	#N/A	#N/A	0	0	#N/A	#N/A	0	0	#N/A	#N/A	0
hsa-miR-3155b				0	#N/A	#N/A	#N/A	#N/A	#N/A	0	#N/A	#N/A	0	0	#N/A	#N/A	0	0	#N/A	#N/A	0	0	#N/A	#N/A	0	0	#N/A	#N/A	0	0	#N/A	#N/A	0
hsa-miR-3155a				0	#N/A	#N/A	#N/A	#N/A	#N/A	0	#N/A	#N/A	0	0	#N/A	#N/A	0	0	#N/A	#N/A	0	0	#N/A	#N/A	0	0	#N/A	#N/A	0	0	#N/A	#N/A	0
hsa-miR-6754-5p				0	#N/A	#N/A	#N/A	#N/A	#N/A	0	#N/A	#N/A	0	0	#N/A	#N/A	0	0	#N/A	#N/A	0	0	#N/A	#N/A	0	0	#N/A	#N/A	0	0	#N/A	#N/A	0
hsa-miR-6798-5p				0	#N/A	#N/A	#N/A	#N/A	#N/A	0	#N/A	#N/A	0	0	#N/A	#N/A	0	0	#N/A	#N/A	0	0	#N/A	#N/A	0	0	#N/A	#N/A	0	0	#N/A	#N/A	0
hsa-miR-16-1-3p				0	#N/A	#N/A	#N/A	#N/A	#N/A	0	#N/A	#N/A	0	0	#N/A	#N/A	0	0	#N/A	#N/A	0	0	#N/A	#N/A	0	0	#N/A	#N/A	0	0	#N/A	#N/A	0
hsa-miR-1910-5p				0	#N/A	#N/A	#N/A	#N/A	#N/A	0	#N/A	#N/A	0	0	#N/A	#N/A	0	0	#N/A	#N/A	0	0	#N/A	#N/A	0	0	#N/A	#N/A	0	0	#N/A	#N/A	0
hsa-miR-5190				0	#N/A	#N/A	#N/A	#N/A	#N/A	0	#N/A	#N/A	0	0	#N/A	#N/A	0	0	#N/A	#N/A	0	0	#N/A	#N/A	0	0	#N/A	#N/A	0	0	#N/A	#N/A	0
hsa-miR-194-3p				0	#N/A	#N/A	#N/A	#N/A	#N/A	0	#N/A	#N/A	0	0	#N/A	#N/A	0	0	#N/A	#N/A	0	0	#N/A	#N/A	0	0	#N/A	#N/A	0	0	#N/A	#N/A	0
hsa-miR-4302				0	#N/A	#N/A	#N/A	#N/A	#N/A	0	#N/A	#N/A	0	0	#N/A	#N/A	0	0	#N/A	#N/A	0	0	#N/A	#N/A	0	0	#N/A	#N/A	0	0	#N/A	#N/A	0
hsa-miR-935				0	#N/A	#N/A	#N/A	#N/A	#N/A	0	#N/A	#N/A	0	0	#N/A	#N/A	0	0	#N/A	#N/A	0	0	#N/A	#N/A	0	0	#N/A	#N/A	0	0	#N/A	#N/A	0
hsa-miR-4328				0	#N/A	#N/A	#N/A	#N/A	#N/A	0	#N/A	#N/A	0	0	#N/A	#N/A	0	0	#N/A	#N/A	0	0	#N/A	#N/A	0	0	#N/A	#N/A	0	0	#N/A	#N/A	0
hsa-miR-8060				0	#N/A	#N/A	#N/A	#N/A	#N/A	0	#N/A	#N/A	0	0	#N/A	#N/A	0	0	#N/A	#N/A	0	0	#N/A	#N/A	0	0	#N/A	#N/A	0	0	#N/A	#N/A	0
hsa-miR-490-5p				115.667	-216.158	-7.75594	0.000626192	0.0901717	0.120229	163	#N/A	#N/A	4555.8	0	#N/A	#N/A	0	184	#N/A	#N/A	6562.38	1	#N/A	#N/A	41.7796	0	#N/A	#N/A	0	0	#N/A	#N/A	0
hsa-miR-10226				0	#N/A	#N/A	#N/A	#N/A	#N/A	0	#N/A	#N/A	0	0	#N/A	#N/A	0	0	#N/A	#N/A	0	0	#N/A	#N/A	0	0	#N/A	#N/A	0	0	#N/A	#N/A	0
hsa-miR-323b-3p				0	#N/A	#N/A	#N/A	#N/A	#N/A	0	#N/A	#N/A	0	0	#N/A	#N/A	0	0	#N/A	#N/A	0	0	#N/A	#N/A	0	0	#N/A	#N/A	0	0	#N/A	#N/A	0
hsa-miR-324-3p				0	#N/A	#N/A	#N/A	#N/A	#N/A	0	#N/A	#N/A	0	0	#N/A	#N/A	0	0	#N/A	#N/A	0	0	#N/A	#N/A	0	0	#N/A	#N/A	0	0	#N/A	#N/A	0
hsa-miR-9902				0	#N/A	#N/A	#N/A	#N/A	#N/A	0	#N/A	#N/A	0	0	#N/A	#N/A	0	0	#N/A	#N/A	0	0	#N/A	#N/A	0	0	#N/A	#N/A	0	0	#N/A	#N/A	0
hsa-miR-488-5p				0	#N/A	#N/A	#N/A	#N/A	#N/A	0	#N/A	#N/A	0	0	#N/A	#N/A	0	0	#N/A	#N/A	0	0	#N/A	#N/A	0	0	#N/A	#N/A	0	0	#N/A	#N/A	0
hsa-miR-4530				0	#N/A	#N/A	#N/A	#N/A	#N/A	0	#N/A	#N/A	0	0	#N/A	#N/A	0	0	#N/A	#N/A	0	0	#N/A	#N/A	0	0	#N/A	#N/A	0	0	#N/A	#N/A	0
hsa-miR-4685-5p				0	#N/A	#N/A	#N/A	#N/A	#N/A	0	#N/A	#N/A	0	0	#N/A	#N/A	0	0	#N/A	#N/A	0	0	#N/A	#N/A	0	0	#N/A	#N/A	0	0	#N/A	#N/A	0
hsa-miR-199a-5p				2.66667	-4.59713	-2.20073	0.259755	0.651646	1	5	#N/A	#N/A	139.748	1	#N/A	#N/A	511.083	2	#N/A	#N/A	71.3302	2	#N/A	#N/A	83.5592	0	#N/A	#N/A	0	0	#N/A	#N/A	0
hsa-miR-199b-5p				0.666667	-2.34066	-1.22692	0.496815	0.841662	1	2	#N/A	#N/A	55.8994	0	#N/A	#N/A	0	0	#N/A	#N/A	0	1	#N/A	#N/A	41.7796	0	#N/A	#N/A	0	0	#N/A	#N/A	0
hsa-miR-6884-3p				0	#N/A	#N/A	#N/A	#N/A	#N/A	0	#N/A	#N/A	0	0	#N/A	#N/A	0	0	#N/A	#N/A	0	0	#N/A	#N/A	0	0	#N/A	#N/A	0	0	#N/A	#N/A	0
hsa-miR-6872-3p				0	#N/A	#N/A	#N/A	#N/A	#N/A	0	#N/A	#N/A	0	0	#N/A	#N/A	0	0	#N/A	#N/A	0	0	#N/A	#N/A	0	0	#N/A	#N/A	0	0	#N/A	#N/A	0
hsa-miR-1224-3p				0	#N/A	#N/A	#N/A	#N/A	#N/A	0	#N/A	#N/A	0	0	#N/A	#N/A	0	0	#N/A	#N/A	0	0	#N/A	#N/A	0	0	#N/A	#N/A	0	0	#N/A	#N/A	0
hsa-miR-1915-3p				0	#N/A	#N/A	#N/A	#N/A	#N/A	0	#N/A	#N/A	0	0	#N/A	#N/A	0	0	#N/A	#N/A	0	0	#N/A	#N/A	0	0	#N/A	#N/A	0	0	#N/A	#N/A	0
hsa-miR-4258				0	#N/A	#N/A	#N/A	#N/A	#N/A	0	#N/A	#N/A	0	0	#N/A	#N/A	0	0	#N/A	#N/A	0	0	#N/A	#N/A	0	0	#N/A	#N/A	0	0	#N/A	#N/A	0
hsa-miR-1247-3p				0	#N/A	#N/A	#N/A	#N/A	#N/A	0	#N/A	#N/A	0	0	#N/A	#N/A	0	0	#N/A	#N/A	0	0	#N/A	#N/A	0	0	#N/A	#N/A	0	0	#N/A	#N/A	0
hsa-miR-4783-3p				0	#N/A	#N/A	#N/A	#N/A	#N/A	0	#N/A	#N/A	0	0	#N/A	#N/A	0	0	#N/A	#N/A	0	0	#N/A	#N/A	0	0	#N/A	#N/A	0	0	#N/A	#N/A	0
hsa-miR-4292				0	#N/A	#N/A	#N/A	#N/A	#N/A	0	#N/A	#N/A	0	0	#N/A	#N/A	0	0	#N/A	#N/A	0	0	#N/A	#N/A	0	0	#N/A	#N/A	0	0	#N/A	#N/A	0
hsa-miR-6791-5p				0	#N/A	#N/A	#N/A	#N/A	#N/A	0	#N/A	#N/A	0	0	#N/A	#N/A	0	0	#N/A	#N/A	0	0	#N/A	#N/A	0	0	#N/A	#N/A	0	0	#N/A	#N/A	0
hsa-miR-6886-5p				0	#N/A	#N/A	#N/A	#N/A	#N/A	0	#N/A	#N/A	0	0	#N/A	#N/A	0	0	#N/A	#N/A	0	0	#N/A	#N/A	0	0	#N/A	#N/A	0	0	#N/A	#N/A	0
hsa-miR-1203				0	#N/A	#N/A	#N/A	#N/A	#N/A	0	#N/A	#N/A	0	0	#N/A	#N/A	0	0	#N/A	#N/A	0	0	#N/A	#N/A	0	0	#N/A	#N/A	0	0	#N/A	#N/A	0
hsa-miR-6850-3p				0	#N/A	#N/A	#N/A	#N/A	#N/A	0	#N/A	#N/A	0	0	#N/A	#N/A	0	0	#N/A	#N/A	0	0	#N/A	#N/A	0	0	#N/A	#N/A	0	0	#N/A	#N/A	0
hsa-miR-6891-3p				0	#N/A	#N/A	#N/A	#N/A	#N/A	0	#N/A	#N/A	0	0	#N/A	#N/A	0	0	#N/A	#N/A	0	0	#N/A	#N/A	0	0	#N/A	#N/A	0	0	#N/A	#N/A	0
hsa-miR-4723-3p				0	#N/A	#N/A	#N/A	#N/A	#N/A	0	#N/A	#N/A	0	0	#N/A	#N/A	0	0	#N/A	#N/A	0	0	#N/A	#N/A	0	0	#N/A	#N/A	0	0	#N/A	#N/A	0
hsa-miR-6769b-3p				0	#N/A	#N/A	#N/A	#N/A	#N/A	0	#N/A	#N/A	0	0	#N/A	#N/A	0	0	#N/A	#N/A	0	0	#N/A	#N/A	0	0	#N/A	#N/A	0	0	#N/A	#N/A	0
hsa-miR-4324				0	#N/A	#N/A	#N/A	#N/A	#N/A	0	#N/A	#N/A	0	0	#N/A	#N/A	0	0	#N/A	#N/A	0	0	#N/A	#N/A	0	0	#N/A	#N/A	0	0	#N/A	#N/A	0
hsa-miR-6893-3p				0	#N/A	#N/A	#N/A	#N/A	#N/A	0	#N/A	#N/A	0	0	#N/A	#N/A	0	0	#N/A	#N/A	0	0	#N/A	#N/A	0	0	#N/A	#N/A	0	0	#N/A	#N/A	0
hsa-miR-939-3p				0	#N/A	#N/A	#N/A	#N/A	#N/A	0	#N/A	#N/A	0	0	#N/A	#N/A	0	0	#N/A	#N/A	0	0	#N/A	#N/A	0	0	#N/A	#N/A	0	0	#N/A	#N/A	0
hsa-miR-6852-5p				0	#N/A	#N/A	#N/A	#N/A	#N/A	0	#N/A	#N/A	0	0	#N/A	#N/A	0	0	#N/A	#N/A	0	0	#N/A	#N/A	0	0	#N/A	#N/A	0	0	#N/A	#N/A	0
hsa-miR-1914-5p				0	#N/A	#N/A	#N/A	#N/A	#N/A	0	#N/A	#N/A	0	0	#N/A	#N/A	0	0	#N/A	#N/A	0	0	#N/A	#N/A	0	0	#N/A	#N/A	0	0	#N/A	#N/A	0
hsa-miR-1266-3p				0	#N/A	#N/A	#N/A	#N/A	#N/A	0	#N/A	#N/A	0	0	#N/A	#N/A	0	0	#N/A	#N/A	0	0	#N/A	#N/A	0	0	#N/A	#N/A	0	0	#N/A	#N/A	0
hsa-miR-6734-3p				0	#N/A	#N/A	#N/A	#N/A	#N/A	0	#N/A	#N/A	0	0	#N/A	#N/A	0	0	#N/A	#N/A	0	0	#N/A	#N/A	0	0	#N/A	#N/A	0	0	#N/A	#N/A	0
hsa-miR-3189-3p				0	#N/A	#N/A	#N/A	#N/A	#N/A	0	#N/A	#N/A	0	0	#N/A	#N/A	0	0	#N/A	#N/A	0	0	#N/A	#N/A	0	0	#N/A	#N/A	0	0	#N/A	#N/A	0
hsa-miR-106b-3p				0	#N/A	#N/A	#N/A	#N/A	#N/A	0	#N/A	#N/A	0	0	#N/A	#N/A	0	0	#N/A	#N/A	0	0	#N/A	#N/A	0	0	#N/A	#N/A	0	0	#N/A	#N/A	0
hsa-miR-6078				0	#N/A	#N/A	#N/A	#N/A	#N/A	0	#N/A	#N/A	0	0	#N/A	#N/A	0	0	#N/A	#N/A	0	0	#N/A	#N/A	0	0	#N/A	#N/A	0	0	#N/A	#N/A	0
hsa-miR-6880-3p				0	#N/A	#N/A	#N/A	#N/A	#N/A	0	#N/A	#N/A	0	0	#N/A	#N/A	0	0	#N/A	#N/A	0	0	#N/A	#N/A	0	0	#N/A	#N/A	0	0	#N/A	#N/A	0
hsa-miR-6812-3p				0	#N/A	#N/A	#N/A	#N/A	#N/A	0	#N/A	#N/A	0	0	#N/A	#N/A	0	0	#N/A	#N/A	0	0	#N/A	#N/A	0	0	#N/A	#N/A	0	0	#N/A	#N/A	0
hsa-miR-4315				0	#N/A	#N/A	#N/A	#N/A	#N/A	0	#N/A	#N/A	0	0	#N/A	#N/A	0	0	#N/A	#N/A	0	0	#N/A	#N/A	0	0	#N/A	#N/A	0	0	#N/A	#N/A	0
hsa-miR-4304				0	#N/A	#N/A	#N/A	#N/A	#N/A	0	#N/A	#N/A	0	0	#N/A	#N/A	0	0	#N/A	#N/A	0	0	#N/A	#N/A	0	0	#N/A	#N/A	0	0	#N/A	#N/A	0
hsa-miR-10392-3p				0	#N/A	#N/A	#N/A	#N/A	#N/A	0	#N/A	#N/A	0	0	#N/A	#N/A	0	0	#N/A	#N/A	0	0	#N/A	#N/A	0	0	#N/A	#N/A	0	0	#N/A	#N/A	0
hsa-miR-1908-3p				0	#N/A	#N/A	#N/A	#N/A	#N/A	0	#N/A	#N/A	0	0	#N/A	#N/A	0	0	#N/A	#N/A	0	0	#N/A	#N/A	0	0	#N/A	#N/A	0	0	#N/A	#N/A	0
hsa-miR-6746-5p				0	#N/A	#N/A	#N/A	#N/A	#N/A	0	#N/A	#N/A	0	0	#N/A	#N/A	0	0	#N/A	#N/A	0	0	#N/A	#N/A	0	0	#N/A	#N/A	0	0	#N/A	#N/A	0
hsa-miR-5090				0	#N/A	#N/A	#N/A	#N/A	#N/A	0	#N/A	#N/A	0	0	#N/A	#N/A	0	0	#N/A	#N/A	0	0	#N/A	#N/A	0	0	#N/A	#N/A	0	0	#N/A	#N/A	0
hsa-miR-4746-5p				0	#N/A	#N/A	#N/A	#N/A	#N/A	0	#N/A	#N/A	0	0	#N/A	#N/A	0	0	#N/A	#N/A	0	0	#N/A	#N/A	0	0	#N/A	#N/A	0	0	#N/A	#N/A	0
hsa-miR-6070				0	#N/A	#N/A	#N/A	#N/A	#N/A	0	#N/A	#N/A	0	0	#N/A	#N/A	0	0	#N/A	#N/A	0	0	#N/A	#N/A	0	0	#N/A	#N/A	0	0	#N/A	#N/A	0
hsa-miR-1181				0	#N/A	#N/A	#N/A	#N/A	#N/A	0	#N/A	#N/A	0	0	#N/A	#N/A	0	0	#N/A	#N/A	0	0	#N/A	#N/A	0	0	#N/A	#N/A	0	0	#N/A	#N/A	0
hsa-miR-4735-5p				0	#N/A	#N/A	#N/A	#N/A	#N/A	0	#N/A	#N/A	0	0	#N/A	#N/A	0	0	#N/A	#N/A	0	0	#N/A	#N/A	0	0	#N/A	#N/A	0	0	#N/A	#N/A	0
hsa-miR-8067				0	#N/A	#N/A	#N/A	#N/A	#N/A	0	#N/A	#N/A	0	0	#N/A	#N/A	0	0	#N/A	#N/A	0	0	#N/A	#N/A	0	0	#N/A	#N/A	0	0	#N/A	#N/A	0
hsa-miR-4305				0	#N/A	#N/A	#N/A	#N/A	#N/A	0	#N/A	#N/A	0	0	#N/A	#N/A	0	0	#N/A	#N/A	0	0	#N/A	#N/A	0	0	#N/A	#N/A	0	0	#N/A	#N/A	0
hsa-miR-325				0	#N/A	#N/A	#N/A	#N/A	#N/A	0	#N/A	#N/A	0	0	#N/A	#N/A	0	0	#N/A	#N/A	0	0	#N/A	#N/A	0	0	#N/A	#N/A	0	0	#N/A	#N/A	0
hsa-miR-26a-2-3p				0	#N/A	#N/A	#N/A	#N/A	#N/A	0	#N/A	#N/A	0	0	#N/A	#N/A	0	0	#N/A	#N/A	0	0	#N/A	#N/A	0	0	#N/A	#N/A	0	0	#N/A	#N/A	0
hsa-miR-26a-1-3p				0	#N/A	#N/A	#N/A	#N/A	#N/A	0	#N/A	#N/A	0	0	#N/A	#N/A	0	0	#N/A	#N/A	0	0	#N/A	#N/A	0	0	#N/A	#N/A	0	0	#N/A	#N/A	0
hsa-miR-372-5p				0	#N/A	#N/A	#N/A	#N/A	#N/A	0	#N/A	#N/A	0	0	#N/A	#N/A	0	0	#N/A	#N/A	0	0	#N/A	#N/A	0	0	#N/A	#N/A	0	0	#N/A	#N/A	0
hsa-miR-6511b-3p				0	#N/A	#N/A	#N/A	#N/A	#N/A	0	#N/A	#N/A	0	0	#N/A	#N/A	0	0	#N/A	#N/A	0	0	#N/A	#N/A	0	0	#N/A	#N/A	0	0	#N/A	#N/A	0
hsa-miR-6511a-3p				0	#N/A	#N/A	#N/A	#N/A	#N/A	0	#N/A	#N/A	0	0	#N/A	#N/A	0	0	#N/A	#N/A	0	0	#N/A	#N/A	0	0	#N/A	#N/A	0	0	#N/A	#N/A	0
hsa-miR-6862-3p				0	#N/A	#N/A	#N/A	#N/A	#N/A	0	#N/A	#N/A	0	0	#N/A	#N/A	0	0	#N/A	#N/A	0	0	#N/A	#N/A	0	0	#N/A	#N/A	0	0	#N/A	#N/A	0
hsa-miR-4330				0	#N/A	#N/A	#N/A	#N/A	#N/A	0	#N/A	#N/A	0	0	#N/A	#N/A	0	0	#N/A	#N/A	0	0	#N/A	#N/A	0	0	#N/A	#N/A	0	0	#N/A	#N/A	0
hsa-miR-1266-5p				0	#N/A	#N/A	#N/A	#N/A	#N/A	0	#N/A	#N/A	0	0	#N/A	#N/A	0	0	#N/A	#N/A	0	0	#N/A	#N/A	0	0	#N/A	#N/A	0	0	#N/A	#N/A	0
hsa-miR-519d-5p				0	#N/A	#N/A	#N/A	#N/A	#N/A	0	#N/A	#N/A	0	0	#N/A	#N/A	0	0	#N/A	#N/A	0	0	#N/A	#N/A	0	0	#N/A	#N/A	0	0	#N/A	#N/A	0
hsa-miR-532-3p				0	#N/A	#N/A	#N/A	#N/A	#N/A	0	#N/A	#N/A	0	0	#N/A	#N/A	0	0	#N/A	#N/A	0	0	#N/A	#N/A	0	0	#N/A	#N/A	0	0	#N/A	#N/A	0
hsa-miR-2116-3p				0	#N/A	#N/A	#N/A	#N/A	#N/A	0	#N/A	#N/A	0	0	#N/A	#N/A	0	0	#N/A	#N/A	0	0	#N/A	#N/A	0	0	#N/A	#N/A	0	0	#N/A	#N/A	0
hsa-miR-7113-3p				0	#N/A	#N/A	#N/A	#N/A	#N/A	0	#N/A	#N/A	0	0	#N/A	#N/A	0	0	#N/A	#N/A	0	0	#N/A	#N/A	0	0	#N/A	#N/A	0	0	#N/A	#N/A	0
hsa-miR-3605-3p				0	#N/A	#N/A	#N/A	#N/A	#N/A	0	#N/A	#N/A	0	0	#N/A	#N/A	0	0	#N/A	#N/A	0	0	#N/A	#N/A	0	0	#N/A	#N/A	0	0	#N/A	#N/A	0
hsa-miR-1976				0	#N/A	#N/A	#N/A	#N/A	#N/A	0	#N/A	#N/A	0	0	#N/A	#N/A	0	0	#N/A	#N/A	0	0	#N/A	#N/A	0	0	#N/A	#N/A	0	0	#N/A	#N/A	0
hsa-miR-8088				0	#N/A	#N/A	#N/A	#N/A	#N/A	0	#N/A	#N/A	0	0	#N/A	#N/A	0	0	#N/A	#N/A	0	0	#N/A	#N/A	0	0	#N/A	#N/A	0	0	#N/A	#N/A	0
hsa-miR-520f-5p				0	#N/A	#N/A	#N/A	#N/A	#N/A	0	#N/A	#N/A	0	0	#N/A	#N/A	0	0	#N/A	#N/A	0	0	#N/A	#N/A	0	0	#N/A	#N/A	0	0	#N/A	#N/A	0
hsa-miR-520b-5p				0	#N/A	#N/A	#N/A	#N/A	#N/A	0	#N/A	#N/A	0	0	#N/A	#N/A	0	0	#N/A	#N/A	0	0	#N/A	#N/A	0	0	#N/A	#N/A	0	0	#N/A	#N/A	0
hsa-miR-517-5p				0	#N/A	#N/A	#N/A	#N/A	#N/A	0	#N/A	#N/A	0	0	#N/A	#N/A	0	0	#N/A	#N/A	0	0	#N/A	#N/A	0	0	#N/A	#N/A	0	0	#N/A	#N/A	0
hsa-miR-3059-3p				0	#N/A	#N/A	#N/A	#N/A	#N/A	0	#N/A	#N/A	0	0	#N/A	#N/A	0	0	#N/A	#N/A	0	0	#N/A	#N/A	0	0	#N/A	#N/A	0	0	#N/A	#N/A	0
hsa-miR-6845-3p				0	#N/A	#N/A	#N/A	#N/A	#N/A	0	#N/A	#N/A	0	0	#N/A	#N/A	0	0	#N/A	#N/A	0	0	#N/A	#N/A	0	0	#N/A	#N/A	0	0	#N/A	#N/A	0
hsa-miR-146a-3p				0	#N/A	#N/A	#N/A	#N/A	#N/A	0	#N/A	#N/A	0	0	#N/A	#N/A	0	0	#N/A	#N/A	0	0	#N/A	#N/A	0	0	#N/A	#N/A	0	0	#N/A	#N/A	0
hsa-miR-326				0	#N/A	#N/A	#N/A	#N/A	#N/A	0	#N/A	#N/A	0	0	#N/A	#N/A	0	0	#N/A	#N/A	0	0	#N/A	#N/A	0	0	#N/A	#N/A	0	0	#N/A	#N/A	0
hsa-miR-1236-3p				0	#N/A	#N/A	#N/A	#N/A	#N/A	0	#N/A	#N/A	0	0	#N/A	#N/A	0	0	#N/A	#N/A	0	0	#N/A	#N/A	0	0	#N/A	#N/A	0	0	#N/A	#N/A	0
hsa-miR-6730-3p				0	#N/A	#N/A	#N/A	#N/A	#N/A	0	#N/A	#N/A	0	0	#N/A	#N/A	0	0	#N/A	#N/A	0	0	#N/A	#N/A	0	0	#N/A	#N/A	0	0	#N/A	#N/A	0
hsa-miR-4750-3p				0	#N/A	#N/A	#N/A	#N/A	#N/A	0	#N/A	#N/A	0	0	#N/A	#N/A	0	0	#N/A	#N/A	0	0	#N/A	#N/A	0	0	#N/A	#N/A	0	0	#N/A	#N/A	0
hsa-miR-4251				0	#N/A	#N/A	#N/A	#N/A	#N/A	0	#N/A	#N/A	0	0	#N/A	#N/A	0	0	#N/A	#N/A	0	0	#N/A	#N/A	0	0	#N/A	#N/A	0	0	#N/A	#N/A	0
hsa-miR-4329				0	#N/A	#N/A	#N/A	#N/A	#N/A	0	#N/A	#N/A	0	0	#N/A	#N/A	0	0	#N/A	#N/A	0	0	#N/A	#N/A	0	0	#N/A	#N/A	0	0	#N/A	#N/A	0
hsa-miR-1199-5p				0	#N/A	#N/A	#N/A	#N/A	#N/A	0	#N/A	#N/A	0	0	#N/A	#N/A	0	0	#N/A	#N/A	0	0	#N/A	#N/A	0	0	#N/A	#N/A	0	0	#N/A	#N/A	0
hsa-miR-3151-3p				0	#N/A	#N/A	#N/A	#N/A	#N/A	0	#N/A	#N/A	0	0	#N/A	#N/A	0	0	#N/A	#N/A	0	0	#N/A	#N/A	0	0	#N/A	#N/A	0	0	#N/A	#N/A	0
hsa-miR-4772-3p				0	#N/A	#N/A	#N/A	#N/A	#N/A	0	#N/A	#N/A	0	0	#N/A	#N/A	0	0	#N/A	#N/A	0	0	#N/A	#N/A	0	0	#N/A	#N/A	0	0	#N/A	#N/A	0
hsa-miR-3158-5p				0	#N/A	#N/A	#N/A	#N/A	#N/A	0	#N/A	#N/A	0	0	#N/A	#N/A	0	0	#N/A	#N/A	0	0	#N/A	#N/A	0	0	#N/A	#N/A	0	0	#N/A	#N/A	0
hsa-miR-1184				0	#N/A	#N/A	#N/A	#N/A	#N/A	0	#N/A	#N/A	0	0	#N/A	#N/A	0	0	#N/A	#N/A	0	0	#N/A	#N/A	0	0	#N/A	#N/A	0	0	#N/A	#N/A	0
hsa-miR-6068				0	#N/A	#N/A	#N/A	#N/A	#N/A	0	#N/A	#N/A	0	0	#N/A	#N/A	0	0	#N/A	#N/A	0	0	#N/A	#N/A	0	0	#N/A	#N/A	0	0	#N/A	#N/A	0
hsa-miR-4520-5p				0	#N/A	#N/A	#N/A	#N/A	#N/A	0	#N/A	#N/A	0	0	#N/A	#N/A	0	0	#N/A	#N/A	0	0	#N/A	#N/A	0	0	#N/A	#N/A	0	0	#N/A	#N/A	0
hsa-miR-3692-5p				0	#N/A	#N/A	#N/A	#N/A	#N/A	0	#N/A	#N/A	0	0	#N/A	#N/A	0	0	#N/A	#N/A	0	0	#N/A	#N/A	0	0	#N/A	#N/A	0	0	#N/A	#N/A	0
hsa-miR-875-3p				0	#N/A	#N/A	#N/A	#N/A	#N/A	0	#N/A	#N/A	0	0	#N/A	#N/A	0	0	#N/A	#N/A	0	0	#N/A	#N/A	0	0	#N/A	#N/A	0	0	#N/A	#N/A	0
hsa-miR-4638-3p				0	#N/A	#N/A	#N/A	#N/A	#N/A	0	#N/A	#N/A	0	0	#N/A	#N/A	0	0	#N/A	#N/A	0	0	#N/A	#N/A	0	0	#N/A	#N/A	0	0	#N/A	#N/A	0
hsa-miR-4720-5p				0	#N/A	#N/A	#N/A	#N/A	#N/A	0	#N/A	#N/A	0	0	#N/A	#N/A	0	0	#N/A	#N/A	0	0	#N/A	#N/A	0	0	#N/A	#N/A	0	0	#N/A	#N/A	0
hsa-miR-3187-5p				0	#N/A	#N/A	#N/A	#N/A	#N/A	0	#N/A	#N/A	0	0	#N/A	#N/A	0	0	#N/A	#N/A	0	0	#N/A	#N/A	0	0	#N/A	#N/A	0	0	#N/A	#N/A	0
hsa-miR-8089				0	#N/A	#N/A	#N/A	#N/A	#N/A	0	#N/A	#N/A	0	0	#N/A	#N/A	0	0	#N/A	#N/A	0	0	#N/A	#N/A	0	0	#N/A	#N/A	0	0	#N/A	#N/A	0
hsa-miR-4456				0	#N/A	#N/A	#N/A	#N/A	#N/A	0	#N/A	#N/A	0	0	#N/A	#N/A	0	0	#N/A	#N/A	0	0	#N/A	#N/A	0	0	#N/A	#N/A	0	0	#N/A	#N/A	0
hsa-miR-3120-5p				0	#N/A	#N/A	#N/A	#N/A	#N/A	0	#N/A	#N/A	0	0	#N/A	#N/A	0	0	#N/A	#N/A	0	0	#N/A	#N/A	0	0	#N/A	#N/A	0	0	#N/A	#N/A	0
hsa-miR-6529-3p				0	#N/A	#N/A	#N/A	#N/A	#N/A	0	#N/A	#N/A	0	0	#N/A	#N/A	0	0	#N/A	#N/A	0	0	#N/A	#N/A	0	0	#N/A	#N/A	0	0	#N/A	#N/A	0
hsa-miR-5008-3p				0	#N/A	#N/A	#N/A	#N/A	#N/A	0	#N/A	#N/A	0	0	#N/A	#N/A	0	0	#N/A	#N/A	0	0	#N/A	#N/A	0	0	#N/A	#N/A	0	0	#N/A	#N/A	0
hsa-miR-134-3p				0	#N/A	#N/A	#N/A	#N/A	#N/A	0	#N/A	#N/A	0	0	#N/A	#N/A	0	0	#N/A	#N/A	0	0	#N/A	#N/A	0	0	#N/A	#N/A	0	0	#N/A	#N/A	0
hsa-miR-26b-3p				0	#N/A	#N/A	#N/A	#N/A	#N/A	0	#N/A	#N/A	0	0	#N/A	#N/A	0	0	#N/A	#N/A	0	0	#N/A	#N/A	0	0	#N/A	#N/A	0	0	#N/A	#N/A	0
hsa-miR-1267				0	#N/A	#N/A	#N/A	#N/A	#N/A	0	#N/A	#N/A	0	0	#N/A	#N/A	0	0	#N/A	#N/A	0	0	#N/A	#N/A	0	0	#N/A	#N/A	0	0	#N/A	#N/A	0
hsa-miR-6837-3p				0	#N/A	#N/A	#N/A	#N/A	#N/A	0	#N/A	#N/A	0	0	#N/A	#N/A	0	0	#N/A	#N/A	0	0	#N/A	#N/A	0	0	#N/A	#N/A	0	0	#N/A	#N/A	0
hsa-miR-570-3p				0	#N/A	#N/A	#N/A	#N/A	#N/A	0	#N/A	#N/A	0	0	#N/A	#N/A	0	0	#N/A	#N/A	0	0	#N/A	#N/A	0	0	#N/A	#N/A	0	0	#N/A	#N/A	0
hsa-miR-15b-3p				0	#N/A	#N/A	#N/A	#N/A	#N/A	0	#N/A	#N/A	0	0	#N/A	#N/A	0	0	#N/A	#N/A	0	0	#N/A	#N/A	0	0	#N/A	#N/A	0	0	#N/A	#N/A	0
hsa-miR-6790-3p				0	#N/A	#N/A	#N/A	#N/A	#N/A	0	#N/A	#N/A	0	0	#N/A	#N/A	0	0	#N/A	#N/A	0	0	#N/A	#N/A	0	0	#N/A	#N/A	0	0	#N/A	#N/A	0
hsa-miR-2114-3p				0	#N/A	#N/A	#N/A	#N/A	#N/A	0	#N/A	#N/A	0	0	#N/A	#N/A	0	0	#N/A	#N/A	0	0	#N/A	#N/A	0	0	#N/A	#N/A	0	0	#N/A	#N/A	0
hsa-miR-3616-3p				0	#N/A	#N/A	#N/A	#N/A	#N/A	0	#N/A	#N/A	0	0	#N/A	#N/A	0	0	#N/A	#N/A	0	0	#N/A	#N/A	0	0	#N/A	#N/A	0	0	#N/A	#N/A	0
hsa-miR-6738-5p				0	#N/A	#N/A	#N/A	#N/A	#N/A	0	#N/A	#N/A	0	0	#N/A	#N/A	0	0	#N/A	#N/A	0	0	#N/A	#N/A	0	0	#N/A	#N/A	0	0	#N/A	#N/A	0
hsa-miR-6804-3p				0	#N/A	#N/A	#N/A	#N/A	#N/A	0	#N/A	#N/A	0	0	#N/A	#N/A	0	0	#N/A	#N/A	0	0	#N/A	#N/A	0	0	#N/A	#N/A	0	0	#N/A	#N/A	0
hsa-miR-3166				0	#N/A	#N/A	#N/A	#N/A	#N/A	0	#N/A	#N/A	0	0	#N/A	#N/A	0	0	#N/A	#N/A	0	0	#N/A	#N/A	0	0	#N/A	#N/A	0	0	#N/A	#N/A	0
hsa-miR-6836-5p				0	#N/A	#N/A	#N/A	#N/A	#N/A	0	#N/A	#N/A	0	0	#N/A	#N/A	0	0	#N/A	#N/A	0	0	#N/A	#N/A	0	0	#N/A	#N/A	0	0	#N/A	#N/A	0
hsa-miR-1909-3p				0	#N/A	#N/A	#N/A	#N/A	#N/A	0	#N/A	#N/A	0	0	#N/A	#N/A	0	0	#N/A	#N/A	0	0	#N/A	#N/A	0	0	#N/A	#N/A	0	0	#N/A	#N/A	0
hsa-miR-324-5p				0.333333	2.37647	1.24882	0.624194	#N/A	1	0	#N/A	#N/A	0	0	#N/A	#N/A	0	0	#N/A	#N/A	0	1	#N/A	#N/A	41.7796	0	#N/A	#N/A	0	0	#N/A	#N/A	0
hsa-miR-4749-3p				0	#N/A	#N/A	#N/A	#N/A	#N/A	0	#N/A	#N/A	0	0	#N/A	#N/A	0	0	#N/A	#N/A	0	0	#N/A	#N/A	0	0	#N/A	#N/A	0	0	#N/A	#N/A	0
hsa-miR-6869-3p				0	#N/A	#N/A	#N/A	#N/A	#N/A	0	#N/A	#N/A	0	0	#N/A	#N/A	0	0	#N/A	#N/A	0	0	#N/A	#N/A	0	0	#N/A	#N/A	0	0	#N/A	#N/A	0
hsa-miR-2682-3p				0	#N/A	#N/A	#N/A	#N/A	#N/A	0	#N/A	#N/A	0	0	#N/A	#N/A	0	0	#N/A	#N/A	0	0	#N/A	#N/A	0	0	#N/A	#N/A	0	0	#N/A	#N/A	0
hsa-miR-4763-5p				0	#N/A	#N/A	#N/A	#N/A	#N/A	0	#N/A	#N/A	0	0	#N/A	#N/A	0	0	#N/A	#N/A	0	0	#N/A	#N/A	0	0	#N/A	#N/A	0	0	#N/A	#N/A	0
hsa-miR-3195				0.333333	2.37647	1.24882	0.624194	#N/A	1	0	#N/A	#N/A	0	0	#N/A	#N/A	0	0	#N/A	#N/A	0	1	#N/A	#N/A	41.7796	0	#N/A	#N/A	0	0	#N/A	#N/A	0
hsa-miR-6720-3p				0	#N/A	#N/A	#N/A	#N/A	#N/A	0	#N/A	#N/A	0	0	#N/A	#N/A	0	0	#N/A	#N/A	0	0	#N/A	#N/A	0	0	#N/A	#N/A	0	0	#N/A	#N/A	0
hsa-miR-4479				0	#N/A	#N/A	#N/A	#N/A	#N/A	0	#N/A	#N/A	0	0	#N/A	#N/A	0	0	#N/A	#N/A	0	0	#N/A	#N/A	0	0	#N/A	#N/A	0	0	#N/A	#N/A	0
hsa-miR-4767				0	#N/A	#N/A	#N/A	#N/A	#N/A	0	#N/A	#N/A	0	0	#N/A	#N/A	0	0	#N/A	#N/A	0	0	#N/A	#N/A	0	0	#N/A	#N/A	0	0	#N/A	#N/A	0
hsa-miR-3621				0	#N/A	#N/A	#N/A	#N/A	#N/A	0	#N/A	#N/A	0	0	#N/A	#N/A	0	0	#N/A	#N/A	0	0	#N/A	#N/A	0	0	#N/A	#N/A	0	0	#N/A	#N/A	0
hsa-miR-1301-5p				0	#N/A	#N/A	#N/A	#N/A	#N/A	0	#N/A	#N/A	0	0	#N/A	#N/A	0	0	#N/A	#N/A	0	0	#N/A	#N/A	0	0	#N/A	#N/A	0	0	#N/A	#N/A	0
hsa-miR-9851-5p				0	#N/A	#N/A	#N/A	#N/A	#N/A	0	#N/A	#N/A	0	0	#N/A	#N/A	0	0	#N/A	#N/A	0	0	#N/A	#N/A	0	0	#N/A	#N/A	0	0	#N/A	#N/A	0
hsa-miR-1251-3p				0	#N/A	#N/A	#N/A	#N/A	#N/A	0	#N/A	#N/A	0	0	#N/A	#N/A	0	0	#N/A	#N/A	0	0	#N/A	#N/A	0	0	#N/A	#N/A	0	0	#N/A	#N/A	0
hsa-miR-1255b-5p				0	#N/A	#N/A	#N/A	#N/A	#N/A	0	#N/A	#N/A	0	0	#N/A	#N/A	0	0	#N/A	#N/A	0	0	#N/A	#N/A	0	0	#N/A	#N/A	0	0	#N/A	#N/A	0
hsa-miR-196a-3p				0	#N/A	#N/A	#N/A	#N/A	#N/A	0	#N/A	#N/A	0	0	#N/A	#N/A	0	0	#N/A	#N/A	0	0	#N/A	#N/A	0	0	#N/A	#N/A	0	0	#N/A	#N/A	0
hsa-miR-874-5p				0	#N/A	#N/A	#N/A	#N/A	#N/A	0	#N/A	#N/A	0	0	#N/A	#N/A	0	0	#N/A	#N/A	0	0	#N/A	#N/A	0	0	#N/A	#N/A	0	0	#N/A	#N/A	0
hsa-miR-1538				0	#N/A	#N/A	#N/A	#N/A	#N/A	0	#N/A	#N/A	0	0	#N/A	#N/A	0	0	#N/A	#N/A	0	0	#N/A	#N/A	0	0	#N/A	#N/A	0	0	#N/A	#N/A	0
hsa-miR-6789-3p				0	#N/A	#N/A	#N/A	#N/A	#N/A	0	#N/A	#N/A	0	0	#N/A	#N/A	0	0	#N/A	#N/A	0	0	#N/A	#N/A	0	0	#N/A	#N/A	0	0	#N/A	#N/A	0
hsa-miR-4634				0	#N/A	#N/A	#N/A	#N/A	#N/A	0	#N/A	#N/A	0	0	#N/A	#N/A	0	0	#N/A	#N/A	0	0	#N/A	#N/A	0	0	#N/A	#N/A	0	0	#N/A	#N/A	0
hsa-miR-10400-5p				0	#N/A	#N/A	#N/A	#N/A	#N/A	0	#N/A	#N/A	0	0	#N/A	#N/A	0	0	#N/A	#N/A	0	0	#N/A	#N/A	0	0	#N/A	#N/A	0	0	#N/A	#N/A	0
hsa-miR-1908-5p				26.3333	-1.07627	-0.106043	0.968874	0.982521	1	79	#N/A	#N/A	2208.03	0	#N/A	#N/A	0	0	#N/A	#N/A	0	51	#N/A	#N/A	2130.76	0	#N/A	#N/A	0	0	#N/A	#N/A	0
hsa-miR-10396b-5p				0	#N/A	#N/A	#N/A	#N/A	#N/A	0	#N/A	#N/A	0	0	#N/A	#N/A	0	0	#N/A	#N/A	0	0	#N/A	#N/A	0	0	#N/A	#N/A	0	0	#N/A	#N/A	0
hsa-miR-760				0	#N/A	#N/A	#N/A	#N/A	#N/A	0	#N/A	#N/A	0	0	#N/A	#N/A	0	0	#N/A	#N/A	0	0	#N/A	#N/A	0	0	#N/A	#N/A	0	0	#N/A	#N/A	0
hsa-miR-3652				0	#N/A	#N/A	#N/A	#N/A	#N/A	0	#N/A	#N/A	0	0	#N/A	#N/A	0	0	#N/A	#N/A	0	0	#N/A	#N/A	0	0	#N/A	#N/A	0	0	#N/A	#N/A	0
hsa-miR-8052				0	#N/A	#N/A	#N/A	#N/A	#N/A	0	#N/A	#N/A	0	0	#N/A	#N/A	0	0	#N/A	#N/A	0	0	#N/A	#N/A	0	0	#N/A	#N/A	0	0	#N/A	#N/A	0
hsa-miR-6726-5p				0	#N/A	#N/A	#N/A	#N/A	#N/A	0	#N/A	#N/A	0	0	#N/A	#N/A	0	0	#N/A	#N/A	0	0	#N/A	#N/A	0	0	#N/A	#N/A	0	0	#N/A	#N/A	0
hsa-miR-6862-5p				0	#N/A	#N/A	#N/A	#N/A	#N/A	0	#N/A	#N/A	0	0	#N/A	#N/A	0	0	#N/A	#N/A	0	0	#N/A	#N/A	0	0	#N/A	#N/A	0	0	#N/A	#N/A	0
hsa-miR-6781-5p				0	#N/A	#N/A	#N/A	#N/A	#N/A	0	#N/A	#N/A	0	0	#N/A	#N/A	0	0	#N/A	#N/A	0	0	#N/A	#N/A	0	0	#N/A	#N/A	0	0	#N/A	#N/A	0
hsa-miR-9899				0	#N/A	#N/A	#N/A	#N/A	#N/A	0	#N/A	#N/A	0	0	#N/A	#N/A	0	0	#N/A	#N/A	0	0	#N/A	#N/A	0	0	#N/A	#N/A	0	0	#N/A	#N/A	0
hsa-miR-1268a				0	#N/A	#N/A	#N/A	#N/A	#N/A	0	#N/A	#N/A	0	0	#N/A	#N/A	0	0	#N/A	#N/A	0	0	#N/A	#N/A	0	0	#N/A	#N/A	0	0	#N/A	#N/A	0
hsa-miR-1268b				0	#N/A	#N/A	#N/A	#N/A	#N/A	0	#N/A	#N/A	0	0	#N/A	#N/A	0	0	#N/A	#N/A	0	0	#N/A	#N/A	0	0	#N/A	#N/A	0	0	#N/A	#N/A	0
hsa-miR-4741				0	#N/A	#N/A	#N/A	#N/A	#N/A	0	#N/A	#N/A	0	0	#N/A	#N/A	0	0	#N/A	#N/A	0	0	#N/A	#N/A	0	0	#N/A	#N/A	0	0	#N/A	#N/A	0
hsa-miR-3175				0	#N/A	#N/A	#N/A	#N/A	#N/A	0	#N/A	#N/A	0	0	#N/A	#N/A	0	0	#N/A	#N/A	0	0	#N/A	#N/A	0	0	#N/A	#N/A	0	0	#N/A	#N/A	0
hsa-miR-486-3p				0	#N/A	#N/A	#N/A	#N/A	#N/A	0	#N/A	#N/A	0	0	#N/A	#N/A	0	0	#N/A	#N/A	0	0	#N/A	#N/A	0	0	#N/A	#N/A	0	0	#N/A	#N/A	0
hsa-miR-6845-5p				0	#N/A	#N/A	#N/A	#N/A	#N/A	0	#N/A	#N/A	0	0	#N/A	#N/A	0	0	#N/A	#N/A	0	0	#N/A	#N/A	0	0	#N/A	#N/A	0	0	#N/A	#N/A	0
hsa-miR-6762-5p				0	#N/A	#N/A	#N/A	#N/A	#N/A	0	#N/A	#N/A	0	0	#N/A	#N/A	0	0	#N/A	#N/A	0	0	#N/A	#N/A	0	0	#N/A	#N/A	0	0	#N/A	#N/A	0
hsa-miR-128-1-5p				0	#N/A	#N/A	#N/A	#N/A	#N/A	0	#N/A	#N/A	0	0	#N/A	#N/A	0	0	#N/A	#N/A	0	0	#N/A	#N/A	0	0	#N/A	#N/A	0	0	#N/A	#N/A	0
hsa-miR-3196				0	#N/A	#N/A	#N/A	#N/A	#N/A	0	#N/A	#N/A	0	0	#N/A	#N/A	0	0	#N/A	#N/A	0	0	#N/A	#N/A	0	0	#N/A	#N/A	0	0	#N/A	#N/A	0
hsa-miR-1237-5p				0	#N/A	#N/A	#N/A	#N/A	#N/A	0	#N/A	#N/A	0	0	#N/A	#N/A	0	0	#N/A	#N/A	0	0	#N/A	#N/A	0	0	#N/A	#N/A	0	0	#N/A	#N/A	0
hsa-miR-7704				0	#N/A	#N/A	#N/A	#N/A	#N/A	0	#N/A	#N/A	0	0	#N/A	#N/A	0	0	#N/A	#N/A	0	0	#N/A	#N/A	0	0	#N/A	#N/A	0	0	#N/A	#N/A	0
hsa-miR-4651				0	#N/A	#N/A	#N/A	#N/A	#N/A	0	#N/A	#N/A	0	0	#N/A	#N/A	0	0	#N/A	#N/A	0	0	#N/A	#N/A	0	0	#N/A	#N/A	0	0	#N/A	#N/A	0
hsa-miR-193b-5p				0	#N/A	#N/A	#N/A	#N/A	#N/A	0	#N/A	#N/A	0	0	#N/A	#N/A	0	0	#N/A	#N/A	0	0	#N/A	#N/A	0	0	#N/A	#N/A	0	0	#N/A	#N/A	0
hsa-miR-197-5p				0	#N/A	#N/A	#N/A	#N/A	#N/A	0	#N/A	#N/A	0	0	#N/A	#N/A	0	0	#N/A	#N/A	0	0	#N/A	#N/A	0	0	#N/A	#N/A	0	0	#N/A	#N/A	0
hsa-miR-363-5p				0	#N/A	#N/A	#N/A	#N/A	#N/A	0	#N/A	#N/A	0	0	#N/A	#N/A	0	0	#N/A	#N/A	0	0	#N/A	#N/A	0	0	#N/A	#N/A	0	0	#N/A	#N/A	0
hsa-miR-6766-5p				0	#N/A	#N/A	#N/A	#N/A	#N/A	0	#N/A	#N/A	0	0	#N/A	#N/A	0	0	#N/A	#N/A	0	0	#N/A	#N/A	0	0	#N/A	#N/A	0	0	#N/A	#N/A	0
hsa-miR-12130				0	#N/A	#N/A	#N/A	#N/A	#N/A	0	#N/A	#N/A	0	0	#N/A	#N/A	0	0	#N/A	#N/A	0	0	#N/A	#N/A	0	0	#N/A	#N/A	0	0	#N/A	#N/A	0
hsa-miR-9901				0	#N/A	#N/A	#N/A	#N/A	#N/A	0	#N/A	#N/A	0	0	#N/A	#N/A	0	0	#N/A	#N/A	0	0	#N/A	#N/A	0	0	#N/A	#N/A	0	0	#N/A	#N/A	0
hsa-miR-8071				0	#N/A	#N/A	#N/A	#N/A	#N/A	0	#N/A	#N/A	0	0	#N/A	#N/A	0	0	#N/A	#N/A	0	0	#N/A	#N/A	0	0	#N/A	#N/A	0	0	#N/A	#N/A	0
hsa-miR-505-3p				0	#N/A	#N/A	#N/A	#N/A	#N/A	0	#N/A	#N/A	0	0	#N/A	#N/A	0	0	#N/A	#N/A	0	0	#N/A	#N/A	0	0	#N/A	#N/A	0	0	#N/A	#N/A	0
hsa-miR-4433a-5p				0	#N/A	#N/A	#N/A	#N/A	#N/A	0	#N/A	#N/A	0	0	#N/A	#N/A	0	0	#N/A	#N/A	0	0	#N/A	#N/A	0	0	#N/A	#N/A	0	0	#N/A	#N/A	0
hsa-miR-4449				0	#N/A	#N/A	#N/A	#N/A	#N/A	0	#N/A	#N/A	0	0	#N/A	#N/A	0	0	#N/A	#N/A	0	0	#N/A	#N/A	0	0	#N/A	#N/A	0	0	#N/A	#N/A	0
hsa-miR-200c-5p				0	#N/A	#N/A	#N/A	#N/A	#N/A	0	#N/A	#N/A	0	0	#N/A	#N/A	0	0	#N/A	#N/A	0	0	#N/A	#N/A	0	0	#N/A	#N/A	0	0	#N/A	#N/A	0
hsa-miR-1227-3p				0	#N/A	#N/A	#N/A	#N/A	#N/A	0	#N/A	#N/A	0	0	#N/A	#N/A	0	0	#N/A	#N/A	0	0	#N/A	#N/A	0	0	#N/A	#N/A	0	0	#N/A	#N/A	0
hsa-miR-7847-3p				0	#N/A	#N/A	#N/A	#N/A	#N/A	0	#N/A	#N/A	0	0	#N/A	#N/A	0	0	#N/A	#N/A	0	0	#N/A	#N/A	0	0	#N/A	#N/A	0	0	#N/A	#N/A	0
hsa-miR-376b-5p				0	#N/A	#N/A	#N/A	#N/A	#N/A	0	#N/A	#N/A	0	0	#N/A	#N/A	0	0	#N/A	#N/A	0	0	#N/A	#N/A	0	0	#N/A	#N/A	0	0	#N/A	#N/A	0
hsa-miR-8056				0	#N/A	#N/A	#N/A	#N/A	#N/A	0	#N/A	#N/A	0	0	#N/A	#N/A	0	0	#N/A	#N/A	0	0	#N/A	#N/A	0	0	#N/A	#N/A	0	0	#N/A	#N/A	0
hsa-miR-223-5p				0	#N/A	#N/A	#N/A	#N/A	#N/A	0	#N/A	#N/A	0	0	#N/A	#N/A	0	0	#N/A	#N/A	0	0	#N/A	#N/A	0	0	#N/A	#N/A	0	0	#N/A	#N/A	0
hsa-miR-4711-3p				0	#N/A	#N/A	#N/A	#N/A	#N/A	0	#N/A	#N/A	0	0	#N/A	#N/A	0	0	#N/A	#N/A	0	0	#N/A	#N/A	0	0	#N/A	#N/A	0	0	#N/A	#N/A	0
hsa-miR-10401-5p				0	#N/A	#N/A	#N/A	#N/A	#N/A	0	#N/A	#N/A	0	0	#N/A	#N/A	0	0	#N/A	#N/A	0	0	#N/A	#N/A	0	0	#N/A	#N/A	0	0	#N/A	#N/A	0
hsa-miR-124-5p				0	#N/A	#N/A	#N/A	#N/A	#N/A	0	#N/A	#N/A	0	0	#N/A	#N/A	0	0	#N/A	#N/A	0	0	#N/A	#N/A	0	0	#N/A	#N/A	0	0	#N/A	#N/A	0
hsa-miR-633				0	#N/A	#N/A	#N/A	#N/A	#N/A	0	#N/A	#N/A	0	0	#N/A	#N/A	0	0	#N/A	#N/A	0	0	#N/A	#N/A	0	0	#N/A	#N/A	0	0	#N/A	#N/A	0
hsa-miR-524-5p				0	#N/A	#N/A	#N/A	#N/A	#N/A	0	#N/A	#N/A	0	0	#N/A	#N/A	0	0	#N/A	#N/A	0	0	#N/A	#N/A	0	0	#N/A	#N/A	0	0	#N/A	#N/A	0
hsa-miR-520d-5p				0	#N/A	#N/A	#N/A	#N/A	#N/A	0	#N/A	#N/A	0	0	#N/A	#N/A	0	0	#N/A	#N/A	0	0	#N/A	#N/A	0	0	#N/A	#N/A	0	0	#N/A	#N/A	0
hsa-miR-7151-3p				0	#N/A	#N/A	#N/A	#N/A	#N/A	0	#N/A	#N/A	0	0	#N/A	#N/A	0	0	#N/A	#N/A	0	0	#N/A	#N/A	0	0	#N/A	#N/A	0	0	#N/A	#N/A	0
hsa-miR-6798-3p				0	#N/A	#N/A	#N/A	#N/A	#N/A	0	#N/A	#N/A	0	0	#N/A	#N/A	0	0	#N/A	#N/A	0	0	#N/A	#N/A	0	0	#N/A	#N/A	0	0	#N/A	#N/A	0
hsa-miR-7848-3p				0	#N/A	#N/A	#N/A	#N/A	#N/A	0	#N/A	#N/A	0	0	#N/A	#N/A	0	0	#N/A	#N/A	0	0	#N/A	#N/A	0	0	#N/A	#N/A	0	0	#N/A	#N/A	0
hsa-miR-3682-5p				0	#N/A	#N/A	#N/A	#N/A	#N/A	0	#N/A	#N/A	0	0	#N/A	#N/A	0	0	#N/A	#N/A	0	0	#N/A	#N/A	0	0	#N/A	#N/A	0	0	#N/A	#N/A	0
hsa-miR-151a-3p				0.666667	-9.85151	-3.30035	0.229555	0.651646	1	2	#N/A	#N/A	55.8994	0	#N/A	#N/A	0	0	#N/A	#N/A	0	0	#N/A	#N/A	0	0	#N/A	#N/A	0	0	#N/A	#N/A	0
hsa-miR-585-5p				0	#N/A	#N/A	#N/A	#N/A	#N/A	0	#N/A	#N/A	0	0	#N/A	#N/A	0	0	#N/A	#N/A	0	0	#N/A	#N/A	0	0	#N/A	#N/A	0	0	#N/A	#N/A	0
hsa-miR-4266				0	#N/A	#N/A	#N/A	#N/A	#N/A	0	#N/A	#N/A	0	0	#N/A	#N/A	0	0	#N/A	#N/A	0	0	#N/A	#N/A	0	0	#N/A	#N/A	0	0	#N/A	#N/A	0
hsa-miR-4278				0	#N/A	#N/A	#N/A	#N/A	#N/A	0	#N/A	#N/A	0	0	#N/A	#N/A	0	0	#N/A	#N/A	0	0	#N/A	#N/A	0	0	#N/A	#N/A	0	0	#N/A	#N/A	0
hsa-miR-331-5p				0	#N/A	#N/A	#N/A	#N/A	#N/A	0	#N/A	#N/A	0	0	#N/A	#N/A	0	0	#N/A	#N/A	0	0	#N/A	#N/A	0	0	#N/A	#N/A	0	0	#N/A	#N/A	0
hsa-miR-6802-5p				0	#N/A	#N/A	#N/A	#N/A	#N/A	0	#N/A	#N/A	0	0	#N/A	#N/A	0	0	#N/A	#N/A	0	0	#N/A	#N/A	0	0	#N/A	#N/A	0	0	#N/A	#N/A	0
hsa-miR-921				0	#N/A	#N/A	#N/A	#N/A	#N/A	0	#N/A	#N/A	0	0	#N/A	#N/A	0	0	#N/A	#N/A	0	0	#N/A	#N/A	0	0	#N/A	#N/A	0	0	#N/A	#N/A	0
hsa-miR-4473				0	#N/A	#N/A	#N/A	#N/A	#N/A	0	#N/A	#N/A	0	0	#N/A	#N/A	0	0	#N/A	#N/A	0	0	#N/A	#N/A	0	0	#N/A	#N/A	0	0	#N/A	#N/A	0
hsa-let-7b-3p				0	#N/A	#N/A	#N/A	#N/A	#N/A	0	#N/A	#N/A	0	0	#N/A	#N/A	0	0	#N/A	#N/A	0	0	#N/A	#N/A	0	0	#N/A	#N/A	0	0	#N/A	#N/A	0
hsa-miR-98-3p				0	#N/A	#N/A	#N/A	#N/A	#N/A	0	#N/A	#N/A	0	0	#N/A	#N/A	0	0	#N/A	#N/A	0	0	#N/A	#N/A	0	0	#N/A	#N/A	0	0	#N/A	#N/A	0
hsa-let-7a-3p				0	#N/A	#N/A	#N/A	#N/A	#N/A	0	#N/A	#N/A	0	0	#N/A	#N/A	0	0	#N/A	#N/A	0	0	#N/A	#N/A	0	0	#N/A	#N/A	0	0	#N/A	#N/A	0
hsa-let-7f-1-3p				0.333333	2.37647	1.24882	0.624194	#N/A	1	0	#N/A	#N/A	0	0	#N/A	#N/A	0	0	#N/A	#N/A	0	1	#N/A	#N/A	41.7796	0	#N/A	#N/A	0	0	#N/A	#N/A	0
hsa-let-7f-2-3p				0	#N/A	#N/A	#N/A	#N/A	#N/A	0	#N/A	#N/A	0	0	#N/A	#N/A	0	0	#N/A	#N/A	0	0	#N/A	#N/A	0	0	#N/A	#N/A	0	0	#N/A	#N/A	0
hsa-let-7d-3p				197.333	4.94537	2.30608	0.330967	0.736817	1	0	#N/A	#N/A	0	0	#N/A	#N/A	0	67	#N/A	#N/A	2389.56	41	#N/A	#N/A	1712.96	551	#N/A	#N/A	10694.8	0	#N/A	#N/A	0
hsa-let-7e-3p				1.33333	-1.26734	-0.3418	0.866247	0.96669	1	4	#N/A	#N/A	111.799	0	#N/A	#N/A	0	0	#N/A	#N/A	0	3	#N/A	#N/A	125.339	0	#N/A	#N/A	0	0	#N/A	#N/A	0
hsa-miR-190a-3p				0	#N/A	#N/A	#N/A	#N/A	#N/A	0	#N/A	#N/A	0	0	#N/A	#N/A	0	0	#N/A	#N/A	0	0	#N/A	#N/A	0	0	#N/A	#N/A	0	0	#N/A	#N/A	0
hsa-miR-8074				0	#N/A	#N/A	#N/A	#N/A	#N/A	0	#N/A	#N/A	0	0	#N/A	#N/A	0	0	#N/A	#N/A	0	0	#N/A	#N/A	0	0	#N/A	#N/A	0	0	#N/A	#N/A	0
hsa-miR-4477a				0	#N/A	#N/A	#N/A	#N/A	#N/A	0	#N/A	#N/A	0	0	#N/A	#N/A	0	0	#N/A	#N/A	0	0	#N/A	#N/A	0	0	#N/A	#N/A	0	0	#N/A	#N/A	0
hsa-miR-6715b-3p				0	#N/A	#N/A	#N/A	#N/A	#N/A	0	#N/A	#N/A	0	0	#N/A	#N/A	0	0	#N/A	#N/A	0	0	#N/A	#N/A	0	0	#N/A	#N/A	0	0	#N/A	#N/A	0
hsa-miR-520e-5p				0	#N/A	#N/A	#N/A	#N/A	#N/A	0	#N/A	#N/A	0	0	#N/A	#N/A	0	0	#N/A	#N/A	0	0	#N/A	#N/A	0	0	#N/A	#N/A	0	0	#N/A	#N/A	0
hsa-miR-4465				0	#N/A	#N/A	#N/A	#N/A	#N/A	0	#N/A	#N/A	0	0	#N/A	#N/A	0	0	#N/A	#N/A	0	0	#N/A	#N/A	0	0	#N/A	#N/A	0	0	#N/A	#N/A	0
hsa-miR-6794-3p				0	#N/A	#N/A	#N/A	#N/A	#N/A	0	#N/A	#N/A	0	0	#N/A	#N/A	0	0	#N/A	#N/A	0	0	#N/A	#N/A	0	0	#N/A	#N/A	0	0	#N/A	#N/A	0
hsa-miR-181b-3p				0	#N/A	#N/A	#N/A	#N/A	#N/A	0	#N/A	#N/A	0	0	#N/A	#N/A	0	0	#N/A	#N/A	0	0	#N/A	#N/A	0	0	#N/A	#N/A	0	0	#N/A	#N/A	0
hsa-miR-181b-2-3p				0	#N/A	#N/A	#N/A	#N/A	#N/A	0	#N/A	#N/A	0	0	#N/A	#N/A	0	0	#N/A	#N/A	0	0	#N/A	#N/A	0	0	#N/A	#N/A	0	0	#N/A	#N/A	0
hsa-miR-222-5p				0	#N/A	#N/A	#N/A	#N/A	#N/A	0	#N/A	#N/A	0	0	#N/A	#N/A	0	0	#N/A	#N/A	0	0	#N/A	#N/A	0	0	#N/A	#N/A	0	0	#N/A	#N/A	0
hsa-miR-4276				0	#N/A	#N/A	#N/A	#N/A	#N/A	0	#N/A	#N/A	0	0	#N/A	#N/A	0	0	#N/A	#N/A	0	0	#N/A	#N/A	0	0	#N/A	#N/A	0	0	#N/A	#N/A	0
hsa-miR-452-3p				0	#N/A	#N/A	#N/A	#N/A	#N/A	0	#N/A	#N/A	0	0	#N/A	#N/A	0	0	#N/A	#N/A	0	0	#N/A	#N/A	0	0	#N/A	#N/A	0	0	#N/A	#N/A	0
hsa-miR-1912-5p				0	#N/A	#N/A	#N/A	#N/A	#N/A	0	#N/A	#N/A	0	0	#N/A	#N/A	0	0	#N/A	#N/A	0	0	#N/A	#N/A	0	0	#N/A	#N/A	0	0	#N/A	#N/A	0
hsa-miR-5696				0	#N/A	#N/A	#N/A	#N/A	#N/A	0	#N/A	#N/A	0	0	#N/A	#N/A	0	0	#N/A	#N/A	0	0	#N/A	#N/A	0	0	#N/A	#N/A	0	0	#N/A	#N/A	0
hsa-miR-520a-5p				0	#N/A	#N/A	#N/A	#N/A	#N/A	0	#N/A	#N/A	0	0	#N/A	#N/A	0	0	#N/A	#N/A	0	0	#N/A	#N/A	0	0	#N/A	#N/A	0	0	#N/A	#N/A	0
hsa-miR-525-5p				0	#N/A	#N/A	#N/A	#N/A	#N/A	0	#N/A	#N/A	0	0	#N/A	#N/A	0	0	#N/A	#N/A	0	0	#N/A	#N/A	0	0	#N/A	#N/A	0	0	#N/A	#N/A	0
hsa-miR-188-3p				0	#N/A	#N/A	#N/A	#N/A	#N/A	0	#N/A	#N/A	0	0	#N/A	#N/A	0	0	#N/A	#N/A	0	0	#N/A	#N/A	0	0	#N/A	#N/A	0	0	#N/A	#N/A	0
hsa-miR-3156-3p				0	#N/A	#N/A	#N/A	#N/A	#N/A	0	#N/A	#N/A	0	0	#N/A	#N/A	0	0	#N/A	#N/A	0	0	#N/A	#N/A	0	0	#N/A	#N/A	0	0	#N/A	#N/A	0
hsa-miR-6763-3p				0	#N/A	#N/A	#N/A	#N/A	#N/A	0	#N/A	#N/A	0	0	#N/A	#N/A	0	0	#N/A	#N/A	0	0	#N/A	#N/A	0	0	#N/A	#N/A	0	0	#N/A	#N/A	0
hsa-miR-6826-3p				0	#N/A	#N/A	#N/A	#N/A	#N/A	0	#N/A	#N/A	0	0	#N/A	#N/A	0	0	#N/A	#N/A	0	0	#N/A	#N/A	0	0	#N/A	#N/A	0	0	#N/A	#N/A	0
hsa-miR-4497				0	#N/A	#N/A	#N/A	#N/A	#N/A	0	#N/A	#N/A	0	0	#N/A	#N/A	0	0	#N/A	#N/A	0	0	#N/A	#N/A	0	0	#N/A	#N/A	0	0	#N/A	#N/A	0
hsa-miR-1468-5p				0	#N/A	#N/A	#N/A	#N/A	#N/A	0	#N/A	#N/A	0	0	#N/A	#N/A	0	0	#N/A	#N/A	0	0	#N/A	#N/A	0	0	#N/A	#N/A	0	0	#N/A	#N/A	0
hsa-miR-155-3p				0	#N/A	#N/A	#N/A	#N/A	#N/A	0	#N/A	#N/A	0	0	#N/A	#N/A	0	0	#N/A	#N/A	0	0	#N/A	#N/A	0	0	#N/A	#N/A	0	0	#N/A	#N/A	0
hsa-miR-337-3p				112.667	1.03659	0.0518459	0.98037	0.987226	1	177	#N/A	#N/A	4947.1	0	#N/A	#N/A	0	138	#N/A	#N/A	4921.78	173	#N/A	#N/A	7227.87	165	#N/A	#N/A	3202.62	0	#N/A	#N/A	0
hsa-miR-6792-3p				0	#N/A	#N/A	#N/A	#N/A	#N/A	0	#N/A	#N/A	0	0	#N/A	#N/A	0	0	#N/A	#N/A	0	0	#N/A	#N/A	0	0	#N/A	#N/A	0	0	#N/A	#N/A	0
hsa-miR-6749-3p				0	#N/A	#N/A	#N/A	#N/A	#N/A	0	#N/A	#N/A	0	0	#N/A	#N/A	0	0	#N/A	#N/A	0	0	#N/A	#N/A	0	0	#N/A	#N/A	0	0	#N/A	#N/A	0
hsa-miR-6780a-3p				0	#N/A	#N/A	#N/A	#N/A	#N/A	0	#N/A	#N/A	0	0	#N/A	#N/A	0	0	#N/A	#N/A	0	0	#N/A	#N/A	0	0	#N/A	#N/A	0	0	#N/A	#N/A	0
hsa-miR-378a-5p				0	#N/A	#N/A	#N/A	#N/A	#N/A	0	#N/A	#N/A	0	0	#N/A	#N/A	0	0	#N/A	#N/A	0	0	#N/A	#N/A	0	0	#N/A	#N/A	0	0	#N/A	#N/A	0
hsa-miR-1200				0	#N/A	#N/A	#N/A	#N/A	#N/A	0	#N/A	#N/A	0	0	#N/A	#N/A	0	0	#N/A	#N/A	0	0	#N/A	#N/A	0	0	#N/A	#N/A	0	0	#N/A	#N/A	0
hsa-miR-1343-3p				0	#N/A	#N/A	#N/A	#N/A	#N/A	0	#N/A	#N/A	0	0	#N/A	#N/A	0	0	#N/A	#N/A	0	0	#N/A	#N/A	0	0	#N/A	#N/A	0	0	#N/A	#N/A	0
hsa-miR-4444				0	#N/A	#N/A	#N/A	#N/A	#N/A	0	#N/A	#N/A	0	0	#N/A	#N/A	0	0	#N/A	#N/A	0	0	#N/A	#N/A	0	0	#N/A	#N/A	0	0	#N/A	#N/A	0
hsa-miR-6726-3p				0	#N/A	#N/A	#N/A	#N/A	#N/A	0	#N/A	#N/A	0	0	#N/A	#N/A	0	0	#N/A	#N/A	0	0	#N/A	#N/A	0	0	#N/A	#N/A	0	0	#N/A	#N/A	0
hsa-miR-4665-3p				0	#N/A	#N/A	#N/A	#N/A	#N/A	0	#N/A	#N/A	0	0	#N/A	#N/A	0	0	#N/A	#N/A	0	0	#N/A	#N/A	0	0	#N/A	#N/A	0	0	#N/A	#N/A	0
hsa-miR-1469				0	#N/A	#N/A	#N/A	#N/A	#N/A	0	#N/A	#N/A	0	0	#N/A	#N/A	0	0	#N/A	#N/A	0	0	#N/A	#N/A	0	0	#N/A	#N/A	0	0	#N/A	#N/A	0
hsa-miR-6771-5p				0	#N/A	#N/A	#N/A	#N/A	#N/A	0	#N/A	#N/A	0	0	#N/A	#N/A	0	0	#N/A	#N/A	0	0	#N/A	#N/A	0	0	#N/A	#N/A	0	0	#N/A	#N/A	0
hsa-miR-4750-5p				0	#N/A	#N/A	#N/A	#N/A	#N/A	0	#N/A	#N/A	0	0	#N/A	#N/A	0	0	#N/A	#N/A	0	0	#N/A	#N/A	0	0	#N/A	#N/A	0	0	#N/A	#N/A	0
hsa-miR-6727-5p				0	#N/A	#N/A	#N/A	#N/A	#N/A	0	#N/A	#N/A	0	0	#N/A	#N/A	0	0	#N/A	#N/A	0	0	#N/A	#N/A	0	0	#N/A	#N/A	0	0	#N/A	#N/A	0
hsa-miR-3677-3p				0	#N/A	#N/A	#N/A	#N/A	#N/A	0	#N/A	#N/A	0	0	#N/A	#N/A	0	0	#N/A	#N/A	0	0	#N/A	#N/A	0	0	#N/A	#N/A	0	0	#N/A	#N/A	0
hsa-miR-518f-5p				0	#N/A	#N/A	#N/A	#N/A	#N/A	0	#N/A	#N/A	0	0	#N/A	#N/A	0	0	#N/A	#N/A	0	0	#N/A	#N/A	0	0	#N/A	#N/A	0	0	#N/A	#N/A	0
hsa-miR-526a-5p				0	#N/A	#N/A	#N/A	#N/A	#N/A	0	#N/A	#N/A	0	0	#N/A	#N/A	0	0	#N/A	#N/A	0	0	#N/A	#N/A	0	0	#N/A	#N/A	0	0	#N/A	#N/A	0
hsa-miR-519c-5p				0	#N/A	#N/A	#N/A	#N/A	#N/A	0	#N/A	#N/A	0	0	#N/A	#N/A	0	0	#N/A	#N/A	0	0	#N/A	#N/A	0	0	#N/A	#N/A	0	0	#N/A	#N/A	0
hsa-miR-1287-3p				0	#N/A	#N/A	#N/A	#N/A	#N/A	0	#N/A	#N/A	0	0	#N/A	#N/A	0	0	#N/A	#N/A	0	0	#N/A	#N/A	0	0	#N/A	#N/A	0	0	#N/A	#N/A	0
hsa-miR-1229-3p				0	#N/A	#N/A	#N/A	#N/A	#N/A	0	#N/A	#N/A	0	0	#N/A	#N/A	0	0	#N/A	#N/A	0	0	#N/A	#N/A	0	0	#N/A	#N/A	0	0	#N/A	#N/A	0
hsa-miR-6867-3p				0	#N/A	#N/A	#N/A	#N/A	#N/A	0	#N/A	#N/A	0	0	#N/A	#N/A	0	0	#N/A	#N/A	0	0	#N/A	#N/A	0	0	#N/A	#N/A	0	0	#N/A	#N/A	0
hsa-miR-4279				0	#N/A	#N/A	#N/A	#N/A	#N/A	0	#N/A	#N/A	0	0	#N/A	#N/A	0	0	#N/A	#N/A	0	0	#N/A	#N/A	0	0	#N/A	#N/A	0	0	#N/A	#N/A	0
hsa-miR-10399-3p				0	#N/A	#N/A	#N/A	#N/A	#N/A	0	#N/A	#N/A	0	0	#N/A	#N/A	0	0	#N/A	#N/A	0	0	#N/A	#N/A	0	0	#N/A	#N/A	0	0	#N/A	#N/A	0
hsa-miR-4684-5p				0	#N/A	#N/A	#N/A	#N/A	#N/A	0	#N/A	#N/A	0	0	#N/A	#N/A	0	0	#N/A	#N/A	0	0	#N/A	#N/A	0	0	#N/A	#N/A	0	0	#N/A	#N/A	0
hsa-miR-3191-5p				0	#N/A	#N/A	#N/A	#N/A	#N/A	0	#N/A	#N/A	0	0	#N/A	#N/A	0	0	#N/A	#N/A	0	0	#N/A	#N/A	0	0	#N/A	#N/A	0	0	#N/A	#N/A	0
hsa-miR-3192-3p				0	#N/A	#N/A	#N/A	#N/A	#N/A	0	#N/A	#N/A	0	0	#N/A	#N/A	0	0	#N/A	#N/A	0	0	#N/A	#N/A	0	0	#N/A	#N/A	0	0	#N/A	#N/A	0
hsa-miR-4314				0	#N/A	#N/A	#N/A	#N/A	#N/A	0	#N/A	#N/A	0	0	#N/A	#N/A	0	0	#N/A	#N/A	0	0	#N/A	#N/A	0	0	#N/A	#N/A	0	0	#N/A	#N/A	0
hsa-miR-526b-5p				0	#N/A	#N/A	#N/A	#N/A	#N/A	0	#N/A	#N/A	0	0	#N/A	#N/A	0	0	#N/A	#N/A	0	0	#N/A	#N/A	0	0	#N/A	#N/A	0	0	#N/A	#N/A	0
hsa-miR-7158-3p				0	#N/A	#N/A	#N/A	#N/A	#N/A	0	#N/A	#N/A	0	0	#N/A	#N/A	0	0	#N/A	#N/A	0	0	#N/A	#N/A	0	0	#N/A	#N/A	0	0	#N/A	#N/A	0
hsa-miR-127-5p				0	#N/A	#N/A	#N/A	#N/A	#N/A	0	#N/A	#N/A	0	0	#N/A	#N/A	0	0	#N/A	#N/A	0	0	#N/A	#N/A	0	0	#N/A	#N/A	0	0	#N/A	#N/A	0
hsa-miR-573				0	#N/A	#N/A	#N/A	#N/A	#N/A	0	#N/A	#N/A	0	0	#N/A	#N/A	0	0	#N/A	#N/A	0	0	#N/A	#N/A	0	0	#N/A	#N/A	0	0	#N/A	#N/A	0
hsa-miR-5585-3p				0	#N/A	#N/A	#N/A	#N/A	#N/A	0	#N/A	#N/A	0	0	#N/A	#N/A	0	0	#N/A	#N/A	0	0	#N/A	#N/A	0	0	#N/A	#N/A	0	0	#N/A	#N/A	0
hsa-miR-192-5p				0.666667	4.18982	2.06689	0.415203	0.775924	1	0	#N/A	#N/A	0	0	#N/A	#N/A	0	0	#N/A	#N/A	0	1	#N/A	#N/A	41.7796	0	#N/A	#N/A	0	1	#N/A	#N/A	135.262
hsa-miR-3136-5p				0	#N/A	#N/A	#N/A	#N/A	#N/A	0	#N/A	#N/A	0	0	#N/A	#N/A	0	0	#N/A	#N/A	0	0	#N/A	#N/A	0	0	#N/A	#N/A	0	0	#N/A	#N/A	0
hsa-miR-943				0	#N/A	#N/A	#N/A	#N/A	#N/A	0	#N/A	#N/A	0	0	#N/A	#N/A	0	0	#N/A	#N/A	0	0	#N/A	#N/A	0	0	#N/A	#N/A	0	0	#N/A	#N/A	0
hsa-miR-3161				0	#N/A	#N/A	#N/A	#N/A	#N/A	0	#N/A	#N/A	0	0	#N/A	#N/A	0	0	#N/A	#N/A	0	0	#N/A	#N/A	0	0	#N/A	#N/A	0	0	#N/A	#N/A	0
hsa-miR-518a-5p				0	#N/A	#N/A	#N/A	#N/A	#N/A	0	#N/A	#N/A	0	0	#N/A	#N/A	0	0	#N/A	#N/A	0	0	#N/A	#N/A	0	0	#N/A	#N/A	0	0	#N/A	#N/A	0
hsa-miR-106a-3p				0	#N/A	#N/A	#N/A	#N/A	#N/A	0	#N/A	#N/A	0	0	#N/A	#N/A	0	0	#N/A	#N/A	0	0	#N/A	#N/A	0	0	#N/A	#N/A	0	0	#N/A	#N/A	0
hsa-miR-1273h-3p				0	#N/A	#N/A	#N/A	#N/A	#N/A	0	#N/A	#N/A	0	0	#N/A	#N/A	0	0	#N/A	#N/A	0	0	#N/A	#N/A	0	0	#N/A	#N/A	0	0	#N/A	#N/A	0
hsa-miR-3678-3p				0	#N/A	#N/A	#N/A	#N/A	#N/A	0	#N/A	#N/A	0	0	#N/A	#N/A	0	0	#N/A	#N/A	0	0	#N/A	#N/A	0	0	#N/A	#N/A	0	0	#N/A	#N/A	0
hsa-miR-7156-3p				0	#N/A	#N/A	#N/A	#N/A	#N/A	0	#N/A	#N/A	0	0	#N/A	#N/A	0	0	#N/A	#N/A	0	0	#N/A	#N/A	0	0	#N/A	#N/A	0	0	#N/A	#N/A	0
hsa-miR-6511b-5p				0	#N/A	#N/A	#N/A	#N/A	#N/A	0	#N/A	#N/A	0	0	#N/A	#N/A	0	0	#N/A	#N/A	0	0	#N/A	#N/A	0	0	#N/A	#N/A	0	0	#N/A	#N/A	0
hsa-miR-192-3p				0	#N/A	#N/A	#N/A	#N/A	#N/A	0	#N/A	#N/A	0	0	#N/A	#N/A	0	0	#N/A	#N/A	0	0	#N/A	#N/A	0	0	#N/A	#N/A	0	0	#N/A	#N/A	0
hsa-miR-12121				0	#N/A	#N/A	#N/A	#N/A	#N/A	0	#N/A	#N/A	0	0	#N/A	#N/A	0	0	#N/A	#N/A	0	0	#N/A	#N/A	0	0	#N/A	#N/A	0	0	#N/A	#N/A	0
hsa-miR-3972				0	#N/A	#N/A	#N/A	#N/A	#N/A	0	#N/A	#N/A	0	0	#N/A	#N/A	0	0	#N/A	#N/A	0	0	#N/A	#N/A	0	0	#N/A	#N/A	0	0	#N/A	#N/A	0
hsa-miR-4659a-5p				0	#N/A	#N/A	#N/A	#N/A	#N/A	0	#N/A	#N/A	0	0	#N/A	#N/A	0	0	#N/A	#N/A	0	0	#N/A	#N/A	0	0	#N/A	#N/A	0	0	#N/A	#N/A	0
hsa-miR-3157-3p				0	#N/A	#N/A	#N/A	#N/A	#N/A	0	#N/A	#N/A	0	0	#N/A	#N/A	0	0	#N/A	#N/A	0	0	#N/A	#N/A	0	0	#N/A	#N/A	0	0	#N/A	#N/A	0
hsa-miR-874-3p				0	#N/A	#N/A	#N/A	#N/A	#N/A	0	#N/A	#N/A	0	0	#N/A	#N/A	0	0	#N/A	#N/A	0	0	#N/A	#N/A	0	0	#N/A	#N/A	0	0	#N/A	#N/A	0
hsa-miR-6514-3p				0	#N/A	#N/A	#N/A	#N/A	#N/A	0	#N/A	#N/A	0	0	#N/A	#N/A	0	0	#N/A	#N/A	0	0	#N/A	#N/A	0	0	#N/A	#N/A	0	0	#N/A	#N/A	0
hsa-let-7i-3p				0	#N/A	#N/A	#N/A	#N/A	#N/A	0	#N/A	#N/A	0	0	#N/A	#N/A	0	0	#N/A	#N/A	0	0	#N/A	#N/A	0	0	#N/A	#N/A	0	0	#N/A	#N/A	0
hsa-miR-1269b				0	#N/A	#N/A	#N/A	#N/A	#N/A	0	#N/A	#N/A	0	0	#N/A	#N/A	0	0	#N/A	#N/A	0	0	#N/A	#N/A	0	0	#N/A	#N/A	0	0	#N/A	#N/A	0
hsa-miR-1269a				0	#N/A	#N/A	#N/A	#N/A	#N/A	0	#N/A	#N/A	0	0	#N/A	#N/A	0	0	#N/A	#N/A	0	0	#N/A	#N/A	0	0	#N/A	#N/A	0	0	#N/A	#N/A	0
hsa-miR-8058				0	#N/A	#N/A	#N/A	#N/A	#N/A	0	#N/A	#N/A	0	0	#N/A	#N/A	0	0	#N/A	#N/A	0	0	#N/A	#N/A	0	0	#N/A	#N/A	0	0	#N/A	#N/A	0
hsa-miR-1270				0	#N/A	#N/A	#N/A	#N/A	#N/A	0	#N/A	#N/A	0	0	#N/A	#N/A	0	0	#N/A	#N/A	0	0	#N/A	#N/A	0	0	#N/A	#N/A	0	0	#N/A	#N/A	0
hsa-miR-4309				0	#N/A	#N/A	#N/A	#N/A	#N/A	0	#N/A	#N/A	0	0	#N/A	#N/A	0	0	#N/A	#N/A	0	0	#N/A	#N/A	0	0	#N/A	#N/A	0	0	#N/A	#N/A	0
hsa-miR-432-3p				0	#N/A	#N/A	#N/A	#N/A	#N/A	0	#N/A	#N/A	0	0	#N/A	#N/A	0	0	#N/A	#N/A	0	0	#N/A	#N/A	0	0	#N/A	#N/A	0	0	#N/A	#N/A	0
hsa-miR-7150				0	#N/A	#N/A	#N/A	#N/A	#N/A	0	#N/A	#N/A	0	0	#N/A	#N/A	0	0	#N/A	#N/A	0	0	#N/A	#N/A	0	0	#N/A	#N/A	0	0	#N/A	#N/A	0
hsa-miR-328-3p				0	#N/A	#N/A	#N/A	#N/A	#N/A	0	#N/A	#N/A	0	0	#N/A	#N/A	0	0	#N/A	#N/A	0	0	#N/A	#N/A	0	0	#N/A	#N/A	0	0	#N/A	#N/A	0
hsa-miR-6878-3p				0	#N/A	#N/A	#N/A	#N/A	#N/A	0	#N/A	#N/A	0	0	#N/A	#N/A	0	0	#N/A	#N/A	0	0	#N/A	#N/A	0	0	#N/A	#N/A	0	0	#N/A	#N/A	0
hsa-miR-4730				0	#N/A	#N/A	#N/A	#N/A	#N/A	0	#N/A	#N/A	0	0	#N/A	#N/A	0	0	#N/A	#N/A	0	0	#N/A	#N/A	0	0	#N/A	#N/A	0	0	#N/A	#N/A	0
hsa-miR-6770-3p				0	#N/A	#N/A	#N/A	#N/A	#N/A	0	#N/A	#N/A	0	0	#N/A	#N/A	0	0	#N/A	#N/A	0	0	#N/A	#N/A	0	0	#N/A	#N/A	0	0	#N/A	#N/A	0
hsa-miR-4298				0	#N/A	#N/A	#N/A	#N/A	#N/A	0	#N/A	#N/A	0	0	#N/A	#N/A	0	0	#N/A	#N/A	0	0	#N/A	#N/A	0	0	#N/A	#N/A	0	0	#N/A	#N/A	0
hsa-miR-6788-5p				0	#N/A	#N/A	#N/A	#N/A	#N/A	0	#N/A	#N/A	0	0	#N/A	#N/A	0	0	#N/A	#N/A	0	0	#N/A	#N/A	0	0	#N/A	#N/A	0	0	#N/A	#N/A	0
hsa-miR-30c-2-3p				0	#N/A	#N/A	#N/A	#N/A	#N/A	0	#N/A	#N/A	0	0	#N/A	#N/A	0	0	#N/A	#N/A	0	0	#N/A	#N/A	0	0	#N/A	#N/A	0	0	#N/A	#N/A	0
hsa-miR-30c-1-3p				0	#N/A	#N/A	#N/A	#N/A	#N/A	0	#N/A	#N/A	0	0	#N/A	#N/A	0	0	#N/A	#N/A	0	0	#N/A	#N/A	0	0	#N/A	#N/A	0	0	#N/A	#N/A	0
hsa-miR-6779-5p				0	#N/A	#N/A	#N/A	#N/A	#N/A	0	#N/A	#N/A	0	0	#N/A	#N/A	0	0	#N/A	#N/A	0	0	#N/A	#N/A	0	0	#N/A	#N/A	0	0	#N/A	#N/A	0
hsa-miR-1273h-5p				0	#N/A	#N/A	#N/A	#N/A	#N/A	0	#N/A	#N/A	0	0	#N/A	#N/A	0	0	#N/A	#N/A	0	0	#N/A	#N/A	0	0	#N/A	#N/A	0	0	#N/A	#N/A	0
hsa-miR-30b-3p				0	#N/A	#N/A	#N/A	#N/A	#N/A	0	#N/A	#N/A	0	0	#N/A	#N/A	0	0	#N/A	#N/A	0	0	#N/A	#N/A	0	0	#N/A	#N/A	0	0	#N/A	#N/A	0
hsa-miR-3689a-3p				0	#N/A	#N/A	#N/A	#N/A	#N/A	0	#N/A	#N/A	0	0	#N/A	#N/A	0	0	#N/A	#N/A	0	0	#N/A	#N/A	0	0	#N/A	#N/A	0	0	#N/A	#N/A	0
hsa-miR-3689b-3p				0	#N/A	#N/A	#N/A	#N/A	#N/A	0	#N/A	#N/A	0	0	#N/A	#N/A	0	0	#N/A	#N/A	0	0	#N/A	#N/A	0	0	#N/A	#N/A	0	0	#N/A	#N/A	0
hsa-miR-769-3p				0	#N/A	#N/A	#N/A	#N/A	#N/A	0	#N/A	#N/A	0	0	#N/A	#N/A	0	0	#N/A	#N/A	0	0	#N/A	#N/A	0	0	#N/A	#N/A	0	0	#N/A	#N/A	0
hsa-miR-6724-5p				0	#N/A	#N/A	#N/A	#N/A	#N/A	0	#N/A	#N/A	0	0	#N/A	#N/A	0	0	#N/A	#N/A	0	0	#N/A	#N/A	0	0	#N/A	#N/A	0	0	#N/A	#N/A	0
hsa-miR-10400-3p				0	#N/A	#N/A	#N/A	#N/A	#N/A	0	#N/A	#N/A	0	0	#N/A	#N/A	0	0	#N/A	#N/A	0	0	#N/A	#N/A	0	0	#N/A	#N/A	0	0	#N/A	#N/A	0
hsa-miR-4674				0	#N/A	#N/A	#N/A	#N/A	#N/A	0	#N/A	#N/A	0	0	#N/A	#N/A	0	0	#N/A	#N/A	0	0	#N/A	#N/A	0	0	#N/A	#N/A	0	0	#N/A	#N/A	0
hsa-miR-3150a-3p				0	#N/A	#N/A	#N/A	#N/A	#N/A	0	#N/A	#N/A	0	0	#N/A	#N/A	0	0	#N/A	#N/A	0	0	#N/A	#N/A	0	0	#N/A	#N/A	0	0	#N/A	#N/A	0
hsa-miR-6763-5p				0	#N/A	#N/A	#N/A	#N/A	#N/A	0	#N/A	#N/A	0	0	#N/A	#N/A	0	0	#N/A	#N/A	0	0	#N/A	#N/A	0	0	#N/A	#N/A	0	0	#N/A	#N/A	0
hsa-miR-4665-5p				0	#N/A	#N/A	#N/A	#N/A	#N/A	0	#N/A	#N/A	0	0	#N/A	#N/A	0	0	#N/A	#N/A	0	0	#N/A	#N/A	0	0	#N/A	#N/A	0	0	#N/A	#N/A	0
hsa-miR-7109-5p				0	#N/A	#N/A	#N/A	#N/A	#N/A	0	#N/A	#N/A	0	0	#N/A	#N/A	0	0	#N/A	#N/A	0	0	#N/A	#N/A	0	0	#N/A	#N/A	0	0	#N/A	#N/A	0
hsa-miR-6803-5p				0	#N/A	#N/A	#N/A	#N/A	#N/A	0	#N/A	#N/A	0	0	#N/A	#N/A	0	0	#N/A	#N/A	0	0	#N/A	#N/A	0	0	#N/A	#N/A	0	0	#N/A	#N/A	0
hsa-miR-3170				0	#N/A	#N/A	#N/A	#N/A	#N/A	0	#N/A	#N/A	0	0	#N/A	#N/A	0	0	#N/A	#N/A	0	0	#N/A	#N/A	0	0	#N/A	#N/A	0	0	#N/A	#N/A	0
hsa-miR-6736-5p				0	#N/A	#N/A	#N/A	#N/A	#N/A	0	#N/A	#N/A	0	0	#N/A	#N/A	0	0	#N/A	#N/A	0	0	#N/A	#N/A	0	0	#N/A	#N/A	0	0	#N/A	#N/A	0
hsa-miR-4507				0	#N/A	#N/A	#N/A	#N/A	#N/A	0	#N/A	#N/A	0	0	#N/A	#N/A	0	0	#N/A	#N/A	0	0	#N/A	#N/A	0	0	#N/A	#N/A	0	0	#N/A	#N/A	0
hsa-miR-150-3p				0	#N/A	#N/A	#N/A	#N/A	#N/A	0	#N/A	#N/A	0	0	#N/A	#N/A	0	0	#N/A	#N/A	0	0	#N/A	#N/A	0	0	#N/A	#N/A	0	0	#N/A	#N/A	0
hsa-miR-29b-2-5p				0	#N/A	#N/A	#N/A	#N/A	#N/A	0	#N/A	#N/A	0	0	#N/A	#N/A	0	0	#N/A	#N/A	0	0	#N/A	#N/A	0	0	#N/A	#N/A	0	0	#N/A	#N/A	0
hsa-miR-2054				0	#N/A	#N/A	#N/A	#N/A	#N/A	0	#N/A	#N/A	0	0	#N/A	#N/A	0	0	#N/A	#N/A	0	0	#N/A	#N/A	0	0	#N/A	#N/A	0	0	#N/A	#N/A	0
hsa-let-7c-3p				0	#N/A	#N/A	#N/A	#N/A	#N/A	0	#N/A	#N/A	0	0	#N/A	#N/A	0	0	#N/A	#N/A	0	0	#N/A	#N/A	0	0	#N/A	#N/A	0	0	#N/A	#N/A	0
hsa-let-7a-2-3p				0	#N/A	#N/A	#N/A	#N/A	#N/A	0	#N/A	#N/A	0	0	#N/A	#N/A	0	0	#N/A	#N/A	0	0	#N/A	#N/A	0	0	#N/A	#N/A	0	0	#N/A	#N/A	0
hsa-let-7g-3p				0	#N/A	#N/A	#N/A	#N/A	#N/A	0	#N/A	#N/A	0	0	#N/A	#N/A	0	0	#N/A	#N/A	0	0	#N/A	#N/A	0	0	#N/A	#N/A	0	0	#N/A	#N/A	0
hsa-miR-675-3p				0	#N/A	#N/A	#N/A	#N/A	#N/A	0	#N/A	#N/A	0	0	#N/A	#N/A	0	0	#N/A	#N/A	0	0	#N/A	#N/A	0	0	#N/A	#N/A	0	0	#N/A	#N/A	0
hsa-miR-676-3p				0	#N/A	#N/A	#N/A	#N/A	#N/A	0	#N/A	#N/A	0	0	#N/A	#N/A	0	0	#N/A	#N/A	0	0	#N/A	#N/A	0	0	#N/A	#N/A	0	0	#N/A	#N/A	0
hsa-miR-210-3p				0	#N/A	#N/A	#N/A	#N/A	#N/A	0	#N/A	#N/A	0	0	#N/A	#N/A	0	0	#N/A	#N/A	0	0	#N/A	#N/A	0	0	#N/A	#N/A	0	0	#N/A	#N/A	0
hsa-miR-4322				0	#N/A	#N/A	#N/A	#N/A	#N/A	0	#N/A	#N/A	0	0	#N/A	#N/A	0	0	#N/A	#N/A	0	0	#N/A	#N/A	0	0	#N/A	#N/A	0	0	#N/A	#N/A	0
hsa-miR-4265				0	#N/A	#N/A	#N/A	#N/A	#N/A	0	#N/A	#N/A	0	0	#N/A	#N/A	0	0	#N/A	#N/A	0	0	#N/A	#N/A	0	0	#N/A	#N/A	0	0	#N/A	#N/A	0
hsa-miR-744-3p				0	#N/A	#N/A	#N/A	#N/A	#N/A	0	#N/A	#N/A	0	0	#N/A	#N/A	0	0	#N/A	#N/A	0	0	#N/A	#N/A	0	0	#N/A	#N/A	0	0	#N/A	#N/A	0
hsa-miR-7702				0	#N/A	#N/A	#N/A	#N/A	#N/A	0	#N/A	#N/A	0	0	#N/A	#N/A	0	0	#N/A	#N/A	0	0	#N/A	#N/A	0	0	#N/A	#N/A	0	0	#N/A	#N/A	0
hsa-miR-8061				0	#N/A	#N/A	#N/A	#N/A	#N/A	0	#N/A	#N/A	0	0	#N/A	#N/A	0	0	#N/A	#N/A	0	0	#N/A	#N/A	0	0	#N/A	#N/A	0	0	#N/A	#N/A	0
hsa-miR-374b-3p				0	#N/A	#N/A	#N/A	#N/A	#N/A	0	#N/A	#N/A	0	0	#N/A	#N/A	0	0	#N/A	#N/A	0	0	#N/A	#N/A	0	0	#N/A	#N/A	0	0	#N/A	#N/A	0
hsa-miR-6083				0	#N/A	#N/A	#N/A	#N/A	#N/A	0	#N/A	#N/A	0	0	#N/A	#N/A	0	0	#N/A	#N/A	0	0	#N/A	#N/A	0	0	#N/A	#N/A	0	0	#N/A	#N/A	0
hsa-miR-374a-3p				0.333333	-1.38079	-0.465494	0.803402	0.96669	1	1	#N/A	#N/A	27.9497	0	#N/A	#N/A	0	0	#N/A	#N/A	0	1	#N/A	#N/A	41.7796	0	#N/A	#N/A	0	0	#N/A	#N/A	0
hsa-miR-491-3p				0	#N/A	#N/A	#N/A	#N/A	#N/A	0	#N/A	#N/A	0	0	#N/A	#N/A	0	0	#N/A	#N/A	0	0	#N/A	#N/A	0	0	#N/A	#N/A	0	0	#N/A	#N/A	0
hsa-miR-3180-5p				0	#N/A	#N/A	#N/A	#N/A	#N/A	0	#N/A	#N/A	0	0	#N/A	#N/A	0	0	#N/A	#N/A	0	0	#N/A	#N/A	0	0	#N/A	#N/A	0	0	#N/A	#N/A	0
hsa-miR-3679-3p				0	#N/A	#N/A	#N/A	#N/A	#N/A	0	#N/A	#N/A	0	0	#N/A	#N/A	0	0	#N/A	#N/A	0	0	#N/A	#N/A	0	0	#N/A	#N/A	0	0	#N/A	#N/A	0
hsa-miR-718				0	#N/A	#N/A	#N/A	#N/A	#N/A	0	#N/A	#N/A	0	0	#N/A	#N/A	0	0	#N/A	#N/A	0	0	#N/A	#N/A	0	0	#N/A	#N/A	0	0	#N/A	#N/A	0
hsa-miR-4664-3p				0	#N/A	#N/A	#N/A	#N/A	#N/A	0	#N/A	#N/A	0	0	#N/A	#N/A	0	0	#N/A	#N/A	0	0	#N/A	#N/A	0	0	#N/A	#N/A	0	0	#N/A	#N/A	0
hsa-miR-1238-3p				0	#N/A	#N/A	#N/A	#N/A	#N/A	0	#N/A	#N/A	0	0	#N/A	#N/A	0	0	#N/A	#N/A	0	0	#N/A	#N/A	0	0	#N/A	#N/A	0	0	#N/A	#N/A	0
hsa-miR-6809-3p				0	#N/A	#N/A	#N/A	#N/A	#N/A	0	#N/A	#N/A	0	0	#N/A	#N/A	0	0	#N/A	#N/A	0	0	#N/A	#N/A	0	0	#N/A	#N/A	0	0	#N/A	#N/A	0
hsa-miR-4762-3p				0	#N/A	#N/A	#N/A	#N/A	#N/A	0	#N/A	#N/A	0	0	#N/A	#N/A	0	0	#N/A	#N/A	0	0	#N/A	#N/A	0	0	#N/A	#N/A	0	0	#N/A	#N/A	0
hsa-miR-6738-3p				0	#N/A	#N/A	#N/A	#N/A	#N/A	0	#N/A	#N/A	0	0	#N/A	#N/A	0	0	#N/A	#N/A	0	0	#N/A	#N/A	0	0	#N/A	#N/A	0	0	#N/A	#N/A	0
hsa-miR-578				0	#N/A	#N/A	#N/A	#N/A	#N/A	0	#N/A	#N/A	0	0	#N/A	#N/A	0	0	#N/A	#N/A	0	0	#N/A	#N/A	0	0	#N/A	#N/A	0	0	#N/A	#N/A	0
hsa-miR-8081				0	#N/A	#N/A	#N/A	#N/A	#N/A	0	#N/A	#N/A	0	0	#N/A	#N/A	0	0	#N/A	#N/A	0	0	#N/A	#N/A	0	0	#N/A	#N/A	0	0	#N/A	#N/A	0
hsa-miR-4776-3p				0	#N/A	#N/A	#N/A	#N/A	#N/A	0	#N/A	#N/A	0	0	#N/A	#N/A	0	0	#N/A	#N/A	0	0	#N/A	#N/A	0	0	#N/A	#N/A	0	0	#N/A	#N/A	0
hsa-miR-5004-3p				0	#N/A	#N/A	#N/A	#N/A	#N/A	0	#N/A	#N/A	0	0	#N/A	#N/A	0	0	#N/A	#N/A	0	0	#N/A	#N/A	0	0	#N/A	#N/A	0	0	#N/A	#N/A	0
hsa-miR-12133				0	#N/A	#N/A	#N/A	#N/A	#N/A	0	#N/A	#N/A	0	0	#N/A	#N/A	0	0	#N/A	#N/A	0	0	#N/A	#N/A	0	0	#N/A	#N/A	0	0	#N/A	#N/A	0
hsa-miR-1271-5p				0.333333	-5.81155	-2.53892	0.373246	#N/A	1	1	#N/A	#N/A	27.9497	0	#N/A	#N/A	0	0	#N/A	#N/A	0	0	#N/A	#N/A	0	0	#N/A	#N/A	0	0	#N/A	#N/A	0
hsa-miR-887-5p				0	#N/A	#N/A	#N/A	#N/A	#N/A	0	#N/A	#N/A	0	0	#N/A	#N/A	0	0	#N/A	#N/A	0	0	#N/A	#N/A	0	0	#N/A	#N/A	0	0	#N/A	#N/A	0
hsa-miR-4260				0	#N/A	#N/A	#N/A	#N/A	#N/A	0	#N/A	#N/A	0	0	#N/A	#N/A	0	0	#N/A	#N/A	0	0	#N/A	#N/A	0	0	#N/A	#N/A	0	0	#N/A	#N/A	0
hsa-miR-659-3p				0	#N/A	#N/A	#N/A	#N/A	#N/A	0	#N/A	#N/A	0	0	#N/A	#N/A	0	0	#N/A	#N/A	0	0	#N/A	#N/A	0	0	#N/A	#N/A	0	0	#N/A	#N/A	0
hsa-miR-30d-3p				0.333333	-5.81155	-2.53892	0.373246	#N/A	1	1	#N/A	#N/A	27.9497	0	#N/A	#N/A	0	0	#N/A	#N/A	0	0	#N/A	#N/A	0	0	#N/A	#N/A	0	0	#N/A	#N/A	0
hsa-miR-30e-3p				0	#N/A	#N/A	#N/A	#N/A	#N/A	0	#N/A	#N/A	0	0	#N/A	#N/A	0	0	#N/A	#N/A	0	0	#N/A	#N/A	0	0	#N/A	#N/A	0	0	#N/A	#N/A	0
hsa-miR-30a-3p				87.6667	-13.7187	-3.77807	0.0946349	0.470766	1	263	#N/A	#N/A	7350.77	0	#N/A	#N/A	0	0	#N/A	#N/A	0	1	#N/A	#N/A	41.7796	0	#N/A	#N/A	0	4	#N/A	#N/A	541.048
hsa-miR-8055				0	#N/A	#N/A	#N/A	#N/A	#N/A	0	#N/A	#N/A	0	0	#N/A	#N/A	0	0	#N/A	#N/A	0	0	#N/A	#N/A	0	0	#N/A	#N/A	0	0	#N/A	#N/A	0
hsa-miR-6885-3p				0	#N/A	#N/A	#N/A	#N/A	#N/A	0	#N/A	#N/A	0	0	#N/A	#N/A	0	0	#N/A	#N/A	0	0	#N/A	#N/A	0	0	#N/A	#N/A	0	0	#N/A	#N/A	0
hsa-miR-129-5p				0	#N/A	#N/A	#N/A	#N/A	#N/A	0	#N/A	#N/A	0	0	#N/A	#N/A	0	0	#N/A	#N/A	0	0	#N/A	#N/A	0	0	#N/A	#N/A	0	0	#N/A	#N/A	0
hsa-miR-12136				0	#N/A	#N/A	#N/A	#N/A	#N/A	0	#N/A	#N/A	0	0	#N/A	#N/A	0	0	#N/A	#N/A	0	0	#N/A	#N/A	0	0	#N/A	#N/A	0	0	#N/A	#N/A	0
hsa-miR-548ad-3p				0	#N/A	#N/A	#N/A	#N/A	#N/A	0	#N/A	#N/A	0	0	#N/A	#N/A	0	0	#N/A	#N/A	0	0	#N/A	#N/A	0	0	#N/A	#N/A	0	0	#N/A	#N/A	0
hsa-miR-4668-3p				0	#N/A	#N/A	#N/A	#N/A	#N/A	0	#N/A	#N/A	0	0	#N/A	#N/A	0	0	#N/A	#N/A	0	0	#N/A	#N/A	0	0	#N/A	#N/A	0	0	#N/A	#N/A	0
hsa-miR-3662				0	#N/A	#N/A	#N/A	#N/A	#N/A	0	#N/A	#N/A	0	0	#N/A	#N/A	0	0	#N/A	#N/A	0	0	#N/A	#N/A	0	0	#N/A	#N/A	0	0	#N/A	#N/A	0
hsa-miR-4311				0	#N/A	#N/A	#N/A	#N/A	#N/A	0	#N/A	#N/A	0	0	#N/A	#N/A	0	0	#N/A	#N/A	0	0	#N/A	#N/A	0	0	#N/A	#N/A	0	0	#N/A	#N/A	0
hsa-miR-518a-3p				0	#N/A	#N/A	#N/A	#N/A	#N/A	0	#N/A	#N/A	0	0	#N/A	#N/A	0	0	#N/A	#N/A	0	0	#N/A	#N/A	0	0	#N/A	#N/A	0	0	#N/A	#N/A	0
hsa-miR-526a-3p				0	#N/A	#N/A	#N/A	#N/A	#N/A	0	#N/A	#N/A	0	0	#N/A	#N/A	0	0	#N/A	#N/A	0	0	#N/A	#N/A	0	0	#N/A	#N/A	0	0	#N/A	#N/A	0
hsa-miR-518f-3p				0	#N/A	#N/A	#N/A	#N/A	#N/A	0	#N/A	#N/A	0	0	#N/A	#N/A	0	0	#N/A	#N/A	0	0	#N/A	#N/A	0	0	#N/A	#N/A	0	0	#N/A	#N/A	0
hsa-miR-548aq-5p				0	#N/A	#N/A	#N/A	#N/A	#N/A	0	#N/A	#N/A	0	0	#N/A	#N/A	0	0	#N/A	#N/A	0	0	#N/A	#N/A	0	0	#N/A	#N/A	0	0	#N/A	#N/A	0
hsa-miR-8054				0	#N/A	#N/A	#N/A	#N/A	#N/A	0	#N/A	#N/A	0	0	#N/A	#N/A	0	0	#N/A	#N/A	0	0	#N/A	#N/A	0	0	#N/A	#N/A	0	0	#N/A	#N/A	0
hsa-miR-526b-3p				0	#N/A	#N/A	#N/A	#N/A	#N/A	0	#N/A	#N/A	0	0	#N/A	#N/A	0	0	#N/A	#N/A	0	0	#N/A	#N/A	0	0	#N/A	#N/A	0	0	#N/A	#N/A	0
hsa-miR-551b-5p				0	#N/A	#N/A	#N/A	#N/A	#N/A	0	#N/A	#N/A	0	0	#N/A	#N/A	0	0	#N/A	#N/A	0	0	#N/A	#N/A	0	0	#N/A	#N/A	0	0	#N/A	#N/A	0
hsa-miR-614				0	#N/A	#N/A	#N/A	#N/A	#N/A	0	#N/A	#N/A	0	0	#N/A	#N/A	0	0	#N/A	#N/A	0	0	#N/A	#N/A	0	0	#N/A	#N/A	0	0	#N/A	#N/A	0
hsa-miR-523-3p				0	#N/A	#N/A	#N/A	#N/A	#N/A	0	#N/A	#N/A	0	0	#N/A	#N/A	0	0	#N/A	#N/A	0	0	#N/A	#N/A	0	0	#N/A	#N/A	0	0	#N/A	#N/A	0
hsa-miR-337-5p				0	#N/A	#N/A	#N/A	#N/A	#N/A	0	#N/A	#N/A	0	0	#N/A	#N/A	0	0	#N/A	#N/A	0	0	#N/A	#N/A	0	0	#N/A	#N/A	0	0	#N/A	#N/A	0
hsa-miR-6750-3p				0	#N/A	#N/A	#N/A	#N/A	#N/A	0	#N/A	#N/A	0	0	#N/A	#N/A	0	0	#N/A	#N/A	0	0	#N/A	#N/A	0	0	#N/A	#N/A	0	0	#N/A	#N/A	0
hsa-miR-4511				0	#N/A	#N/A	#N/A	#N/A	#N/A	0	#N/A	#N/A	0	0	#N/A	#N/A	0	0	#N/A	#N/A	0	0	#N/A	#N/A	0	0	#N/A	#N/A	0	0	#N/A	#N/A	0
hsa-miR-6507-5p				0	#N/A	#N/A	#N/A	#N/A	#N/A	0	#N/A	#N/A	0	0	#N/A	#N/A	0	0	#N/A	#N/A	0	0	#N/A	#N/A	0	0	#N/A	#N/A	0	0	#N/A	#N/A	0
hsa-miR-8087				0	#N/A	#N/A	#N/A	#N/A	#N/A	0	#N/A	#N/A	0	0	#N/A	#N/A	0	0	#N/A	#N/A	0	0	#N/A	#N/A	0	0	#N/A	#N/A	0	0	#N/A	#N/A	0
hsa-miR-4426				0	#N/A	#N/A	#N/A	#N/A	#N/A	0	#N/A	#N/A	0	0	#N/A	#N/A	0	0	#N/A	#N/A	0	0	#N/A	#N/A	0	0	#N/A	#N/A	0	0	#N/A	#N/A	0
hsa-miR-4647				0	#N/A	#N/A	#N/A	#N/A	#N/A	0	#N/A	#N/A	0	0	#N/A	#N/A	0	0	#N/A	#N/A	0	0	#N/A	#N/A	0	0	#N/A	#N/A	0	0	#N/A	#N/A	0
hsa-miR-6796-3p				0	#N/A	#N/A	#N/A	#N/A	#N/A	0	#N/A	#N/A	0	0	#N/A	#N/A	0	0	#N/A	#N/A	0	0	#N/A	#N/A	0	0	#N/A	#N/A	0	0	#N/A	#N/A	0
hsa-miR-8080				0	#N/A	#N/A	#N/A	#N/A	#N/A	0	#N/A	#N/A	0	0	#N/A	#N/A	0	0	#N/A	#N/A	0	0	#N/A	#N/A	0	0	#N/A	#N/A	0	0	#N/A	#N/A	0
hsa-miR-6816-3p				0	#N/A	#N/A	#N/A	#N/A	#N/A	0	#N/A	#N/A	0	0	#N/A	#N/A	0	0	#N/A	#N/A	0	0	#N/A	#N/A	0	0	#N/A	#N/A	0	0	#N/A	#N/A	0
hsa-miR-3714				0	#N/A	#N/A	#N/A	#N/A	#N/A	0	#N/A	#N/A	0	0	#N/A	#N/A	0	0	#N/A	#N/A	0	0	#N/A	#N/A	0	0	#N/A	#N/A	0	0	#N/A	#N/A	0
hsa-miR-525-3p				0	#N/A	#N/A	#N/A	#N/A	#N/A	0	#N/A	#N/A	0	0	#N/A	#N/A	0	0	#N/A	#N/A	0	0	#N/A	#N/A	0	0	#N/A	#N/A	0	0	#N/A	#N/A	0
hsa-miR-524-3p				0	#N/A	#N/A	#N/A	#N/A	#N/A	0	#N/A	#N/A	0	0	#N/A	#N/A	0	0	#N/A	#N/A	0	0	#N/A	#N/A	0	0	#N/A	#N/A	0	0	#N/A	#N/A	0
hsa-miR-373-3p				0	#N/A	#N/A	#N/A	#N/A	#N/A	0	#N/A	#N/A	0	0	#N/A	#N/A	0	0	#N/A	#N/A	0	0	#N/A	#N/A	0	0	#N/A	#N/A	0	0	#N/A	#N/A	0
hsa-miR-12117				0	#N/A	#N/A	#N/A	#N/A	#N/A	0	#N/A	#N/A	0	0	#N/A	#N/A	0	0	#N/A	#N/A	0	0	#N/A	#N/A	0	0	#N/A	#N/A	0	0	#N/A	#N/A	0
hsa-miR-595				0	#N/A	#N/A	#N/A	#N/A	#N/A	0	#N/A	#N/A	0	0	#N/A	#N/A	0	0	#N/A	#N/A	0	0	#N/A	#N/A	0	0	#N/A	#N/A	0	0	#N/A	#N/A	0
hsa-miR-495-5p				0	#N/A	#N/A	#N/A	#N/A	#N/A	0	#N/A	#N/A	0	0	#N/A	#N/A	0	0	#N/A	#N/A	0	0	#N/A	#N/A	0	0	#N/A	#N/A	0	0	#N/A	#N/A	0
hsa-miR-382-5p				172	60.7644	5.92515	0.0445229	0.343683	1	4	#N/A	#N/A	111.799	0	#N/A	#N/A	0	0	#N/A	#N/A	0	0	#N/A	#N/A	0	516	#N/A	#N/A	10015.5	0	#N/A	#N/A	0
hsa-miR-6082				0	#N/A	#N/A	#N/A	#N/A	#N/A	0	#N/A	#N/A	0	0	#N/A	#N/A	0	0	#N/A	#N/A	0	0	#N/A	#N/A	0	0	#N/A	#N/A	0	0	#N/A	#N/A	0
hsa-miR-8084				0	#N/A	#N/A	#N/A	#N/A	#N/A	0	#N/A	#N/A	0	0	#N/A	#N/A	0	0	#N/A	#N/A	0	0	#N/A	#N/A	0	0	#N/A	#N/A	0	0	#N/A	#N/A	0
hsa-miR-5583-3p				0	#N/A	#N/A	#N/A	#N/A	#N/A	0	#N/A	#N/A	0	0	#N/A	#N/A	0	0	#N/A	#N/A	0	0	#N/A	#N/A	0	0	#N/A	#N/A	0	0	#N/A	#N/A	0
hsa-miR-3610				0	#N/A	#N/A	#N/A	#N/A	#N/A	0	#N/A	#N/A	0	0	#N/A	#N/A	0	0	#N/A	#N/A	0	0	#N/A	#N/A	0	0	#N/A	#N/A	0	0	#N/A	#N/A	0
hsa-miR-409-3p				77.3333	27.0363	4.75683	0.0555761	0.369532	1	4	#N/A	#N/A	111.799	0	#N/A	#N/A	0	0	#N/A	#N/A	0	6	#N/A	#N/A	250.678	226	#N/A	#N/A	4386.62	0	#N/A	#N/A	0
hsa-miR-10523-5p				0	#N/A	#N/A	#N/A	#N/A	#N/A	0	#N/A	#N/A	0	0	#N/A	#N/A	0	0	#N/A	#N/A	0	0	#N/A	#N/A	0	0	#N/A	#N/A	0	0	#N/A	#N/A	0
hsa-miR-7849-3p				0	#N/A	#N/A	#N/A	#N/A	#N/A	0	#N/A	#N/A	0	0	#N/A	#N/A	0	0	#N/A	#N/A	0	0	#N/A	#N/A	0	0	#N/A	#N/A	0	0	#N/A	#N/A	0
hsa-miR-4643				0	#N/A	#N/A	#N/A	#N/A	#N/A	0	#N/A	#N/A	0	0	#N/A	#N/A	0	0	#N/A	#N/A	0	0	#N/A	#N/A	0	0	#N/A	#N/A	0	0	#N/A	#N/A	0
hsa-miR-602				0	#N/A	#N/A	#N/A	#N/A	#N/A	0	#N/A	#N/A	0	0	#N/A	#N/A	0	0	#N/A	#N/A	0	0	#N/A	#N/A	0	0	#N/A	#N/A	0	0	#N/A	#N/A	0
hsa-miR-4704-5p				0	#N/A	#N/A	#N/A	#N/A	#N/A	0	#N/A	#N/A	0	0	#N/A	#N/A	0	0	#N/A	#N/A	0	0	#N/A	#N/A	0	0	#N/A	#N/A	0	0	#N/A	#N/A	0
hsa-miR-4797-5p				0	#N/A	#N/A	#N/A	#N/A	#N/A	0	#N/A	#N/A	0	0	#N/A	#N/A	0	0	#N/A	#N/A	0	0	#N/A	#N/A	0	0	#N/A	#N/A	0	0	#N/A	#N/A	0
hsa-miR-4262				0	#N/A	#N/A	#N/A	#N/A	#N/A	0	#N/A	#N/A	0	0	#N/A	#N/A	0	0	#N/A	#N/A	0	0	#N/A	#N/A	0	0	#N/A	#N/A	0	0	#N/A	#N/A	0
hsa-miR-4523				0	#N/A	#N/A	#N/A	#N/A	#N/A	0	#N/A	#N/A	0	0	#N/A	#N/A	0	0	#N/A	#N/A	0	0	#N/A	#N/A	0	0	#N/A	#N/A	0	0	#N/A	#N/A	0
hsa-miR-619-3p				0	#N/A	#N/A	#N/A	#N/A	#N/A	0	#N/A	#N/A	0	0	#N/A	#N/A	0	0	#N/A	#N/A	0	0	#N/A	#N/A	0	0	#N/A	#N/A	0	0	#N/A	#N/A	0
hsa-miR-625-3p				0	#N/A	#N/A	#N/A	#N/A	#N/A	0	#N/A	#N/A	0	0	#N/A	#N/A	0	0	#N/A	#N/A	0	0	#N/A	#N/A	0	0	#N/A	#N/A	0	0	#N/A	#N/A	0
hsa-miR-3680-5p				0	#N/A	#N/A	#N/A	#N/A	#N/A	0	#N/A	#N/A	0	0	#N/A	#N/A	0	0	#N/A	#N/A	0	0	#N/A	#N/A	0	0	#N/A	#N/A	0	0	#N/A	#N/A	0
hsa-miR-888-3p				0	#N/A	#N/A	#N/A	#N/A	#N/A	0	#N/A	#N/A	0	0	#N/A	#N/A	0	0	#N/A	#N/A	0	0	#N/A	#N/A	0	0	#N/A	#N/A	0	0	#N/A	#N/A	0
hsa-miR-3654				0	#N/A	#N/A	#N/A	#N/A	#N/A	0	#N/A	#N/A	0	0	#N/A	#N/A	0	0	#N/A	#N/A	0	0	#N/A	#N/A	0	0	#N/A	#N/A	0	0	#N/A	#N/A	0
hsa-miR-12126				0	#N/A	#N/A	#N/A	#N/A	#N/A	0	#N/A	#N/A	0	0	#N/A	#N/A	0	0	#N/A	#N/A	0	0	#N/A	#N/A	0	0	#N/A	#N/A	0	0	#N/A	#N/A	0
hsa-miR-5680				0	#N/A	#N/A	#N/A	#N/A	#N/A	0	#N/A	#N/A	0	0	#N/A	#N/A	0	0	#N/A	#N/A	0	0	#N/A	#N/A	0	0	#N/A	#N/A	0	0	#N/A	#N/A	0
hsa-miR-4524b-3p				0	#N/A	#N/A	#N/A	#N/A	#N/A	0	#N/A	#N/A	0	0	#N/A	#N/A	0	0	#N/A	#N/A	0	0	#N/A	#N/A	0	0	#N/A	#N/A	0	0	#N/A	#N/A	0
hsa-miR-4463				0	#N/A	#N/A	#N/A	#N/A	#N/A	0	#N/A	#N/A	0	0	#N/A	#N/A	0	0	#N/A	#N/A	0	0	#N/A	#N/A	0	0	#N/A	#N/A	0	0	#N/A	#N/A	0
hsa-miR-6529-5p				0	#N/A	#N/A	#N/A	#N/A	#N/A	0	#N/A	#N/A	0	0	#N/A	#N/A	0	0	#N/A	#N/A	0	0	#N/A	#N/A	0	0	#N/A	#N/A	0	0	#N/A	#N/A	0
hsa-miR-2278				0	#N/A	#N/A	#N/A	#N/A	#N/A	0	#N/A	#N/A	0	0	#N/A	#N/A	0	0	#N/A	#N/A	0	0	#N/A	#N/A	0	0	#N/A	#N/A	0	0	#N/A	#N/A	0
hsa-miR-6859-5p				0	#N/A	#N/A	#N/A	#N/A	#N/A	0	#N/A	#N/A	0	0	#N/A	#N/A	0	0	#N/A	#N/A	0	0	#N/A	#N/A	0	0	#N/A	#N/A	0	0	#N/A	#N/A	0
hsa-miR-3908				0	#N/A	#N/A	#N/A	#N/A	#N/A	0	#N/A	#N/A	0	0	#N/A	#N/A	0	0	#N/A	#N/A	0	0	#N/A	#N/A	0	0	#N/A	#N/A	0	0	#N/A	#N/A	0
hsa-miR-4690-5p				0	#N/A	#N/A	#N/A	#N/A	#N/A	0	#N/A	#N/A	0	0	#N/A	#N/A	0	0	#N/A	#N/A	0	0	#N/A	#N/A	0	0	#N/A	#N/A	0	0	#N/A	#N/A	0
hsa-miR-4676-5p				0	#N/A	#N/A	#N/A	#N/A	#N/A	0	#N/A	#N/A	0	0	#N/A	#N/A	0	0	#N/A	#N/A	0	0	#N/A	#N/A	0	0	#N/A	#N/A	0	0	#N/A	#N/A	0
hsa-miR-575				0	#N/A	#N/A	#N/A	#N/A	#N/A	0	#N/A	#N/A	0	0	#N/A	#N/A	0	0	#N/A	#N/A	0	0	#N/A	#N/A	0	0	#N/A	#N/A	0	0	#N/A	#N/A	0
hsa-miR-6769a-3p				0	#N/A	#N/A	#N/A	#N/A	#N/A	0	#N/A	#N/A	0	0	#N/A	#N/A	0	0	#N/A	#N/A	0	0	#N/A	#N/A	0	0	#N/A	#N/A	0	0	#N/A	#N/A	0
hsa-miR-590-5p				0	#N/A	#N/A	#N/A	#N/A	#N/A	0	#N/A	#N/A	0	0	#N/A	#N/A	0	0	#N/A	#N/A	0	0	#N/A	#N/A	0	0	#N/A	#N/A	0	0	#N/A	#N/A	0
hsa-miR-4538				0	#N/A	#N/A	#N/A	#N/A	#N/A	0	#N/A	#N/A	0	0	#N/A	#N/A	0	0	#N/A	#N/A	0	0	#N/A	#N/A	0	0	#N/A	#N/A	0	0	#N/A	#N/A	0
hsa-miR-4453				0	#N/A	#N/A	#N/A	#N/A	#N/A	0	#N/A	#N/A	0	0	#N/A	#N/A	0	0	#N/A	#N/A	0	0	#N/A	#N/A	0	0	#N/A	#N/A	0	0	#N/A	#N/A	0
hsa-miR-208a-5p				0	#N/A	#N/A	#N/A	#N/A	#N/A	0	#N/A	#N/A	0	0	#N/A	#N/A	0	0	#N/A	#N/A	0	0	#N/A	#N/A	0	0	#N/A	#N/A	0	0	#N/A	#N/A	0
hsa-miR-4496				0	#N/A	#N/A	#N/A	#N/A	#N/A	0	#N/A	#N/A	0	0	#N/A	#N/A	0	0	#N/A	#N/A	0	0	#N/A	#N/A	0	0	#N/A	#N/A	0	0	#N/A	#N/A	0
hsa-miR-12124				0	#N/A	#N/A	#N/A	#N/A	#N/A	0	#N/A	#N/A	0	0	#N/A	#N/A	0	0	#N/A	#N/A	0	0	#N/A	#N/A	0	0	#N/A	#N/A	0	0	#N/A	#N/A	0
hsa-miR-1910-3p				0	#N/A	#N/A	#N/A	#N/A	#N/A	0	#N/A	#N/A	0	0	#N/A	#N/A	0	0	#N/A	#N/A	0	0	#N/A	#N/A	0	0	#N/A	#N/A	0	0	#N/A	#N/A	0
hsa-miR-4478				0	#N/A	#N/A	#N/A	#N/A	#N/A	0	#N/A	#N/A	0	0	#N/A	#N/A	0	0	#N/A	#N/A	0	0	#N/A	#N/A	0	0	#N/A	#N/A	0	0	#N/A	#N/A	0
hsa-miR-3929				0	#N/A	#N/A	#N/A	#N/A	#N/A	0	#N/A	#N/A	0	0	#N/A	#N/A	0	0	#N/A	#N/A	0	0	#N/A	#N/A	0	0	#N/A	#N/A	0	0	#N/A	#N/A	0
hsa-miR-7843-5p				0	#N/A	#N/A	#N/A	#N/A	#N/A	0	#N/A	#N/A	0	0	#N/A	#N/A	0	0	#N/A	#N/A	0	0	#N/A	#N/A	0	0	#N/A	#N/A	0	0	#N/A	#N/A	0
hsa-miR-4632-5p				0	#N/A	#N/A	#N/A	#N/A	#N/A	0	#N/A	#N/A	0	0	#N/A	#N/A	0	0	#N/A	#N/A	0	0	#N/A	#N/A	0	0	#N/A	#N/A	0	0	#N/A	#N/A	0
hsa-miR-4761-3p				0	#N/A	#N/A	#N/A	#N/A	#N/A	0	#N/A	#N/A	0	0	#N/A	#N/A	0	0	#N/A	#N/A	0	0	#N/A	#N/A	0	0	#N/A	#N/A	0	0	#N/A	#N/A	0
hsa-miR-3141				0	#N/A	#N/A	#N/A	#N/A	#N/A	0	#N/A	#N/A	0	0	#N/A	#N/A	0	0	#N/A	#N/A	0	0	#N/A	#N/A	0	0	#N/A	#N/A	0	0	#N/A	#N/A	0
hsa-miR-1182				0	#N/A	#N/A	#N/A	#N/A	#N/A	0	#N/A	#N/A	0	0	#N/A	#N/A	0	0	#N/A	#N/A	0	0	#N/A	#N/A	0	0	#N/A	#N/A	0	0	#N/A	#N/A	0
hsa-miR-296-3p				0	#N/A	#N/A	#N/A	#N/A	#N/A	0	#N/A	#N/A	0	0	#N/A	#N/A	0	0	#N/A	#N/A	0	0	#N/A	#N/A	0	0	#N/A	#N/A	0	0	#N/A	#N/A	0
hsa-miR-4748				0	#N/A	#N/A	#N/A	#N/A	#N/A	0	#N/A	#N/A	0	0	#N/A	#N/A	0	0	#N/A	#N/A	0	0	#N/A	#N/A	0	0	#N/A	#N/A	0	0	#N/A	#N/A	0
hsa-miR-329-5p				0	#N/A	#N/A	#N/A	#N/A	#N/A	0	#N/A	#N/A	0	0	#N/A	#N/A	0	0	#N/A	#N/A	0	0	#N/A	#N/A	0	0	#N/A	#N/A	0	0	#N/A	#N/A	0
hsa-miR-515-3p				0	#N/A	#N/A	#N/A	#N/A	#N/A	0	#N/A	#N/A	0	0	#N/A	#N/A	0	0	#N/A	#N/A	0	0	#N/A	#N/A	0	0	#N/A	#N/A	0	0	#N/A	#N/A	0
hsa-miR-6849-5p				0	#N/A	#N/A	#N/A	#N/A	#N/A	0	#N/A	#N/A	0	0	#N/A	#N/A	0	0	#N/A	#N/A	0	0	#N/A	#N/A	0	0	#N/A	#N/A	0	0	#N/A	#N/A	0
hsa-miR-1296-3p				0	#N/A	#N/A	#N/A	#N/A	#N/A	0	#N/A	#N/A	0	0	#N/A	#N/A	0	0	#N/A	#N/A	0	0	#N/A	#N/A	0	0	#N/A	#N/A	0	0	#N/A	#N/A	0
hsa-miR-4280				0	#N/A	#N/A	#N/A	#N/A	#N/A	0	#N/A	#N/A	0	0	#N/A	#N/A	0	0	#N/A	#N/A	0	0	#N/A	#N/A	0	0	#N/A	#N/A	0	0	#N/A	#N/A	0
hsa-miR-3168				0	#N/A	#N/A	#N/A	#N/A	#N/A	0	#N/A	#N/A	0	0	#N/A	#N/A	0	0	#N/A	#N/A	0	0	#N/A	#N/A	0	0	#N/A	#N/A	0	0	#N/A	#N/A	0
hsa-miR-3074-3p				0	#N/A	#N/A	#N/A	#N/A	#N/A	0	#N/A	#N/A	0	0	#N/A	#N/A	0	0	#N/A	#N/A	0	0	#N/A	#N/A	0	0	#N/A	#N/A	0	0	#N/A	#N/A	0
hsa-miR-6074				0	#N/A	#N/A	#N/A	#N/A	#N/A	0	#N/A	#N/A	0	0	#N/A	#N/A	0	0	#N/A	#N/A	0	0	#N/A	#N/A	0	0	#N/A	#N/A	0	0	#N/A	#N/A	0
hsa-miR-7151-5p				0	#N/A	#N/A	#N/A	#N/A	#N/A	0	#N/A	#N/A	0	0	#N/A	#N/A	0	0	#N/A	#N/A	0	0	#N/A	#N/A	0	0	#N/A	#N/A	0	0	#N/A	#N/A	0
hsa-miR-6866-3p				0	#N/A	#N/A	#N/A	#N/A	#N/A	0	#N/A	#N/A	0	0	#N/A	#N/A	0	0	#N/A	#N/A	0	0	#N/A	#N/A	0	0	#N/A	#N/A	0	0	#N/A	#N/A	0
hsa-miR-1285-5p				0	#N/A	#N/A	#N/A	#N/A	#N/A	0	#N/A	#N/A	0	0	#N/A	#N/A	0	0	#N/A	#N/A	0	0	#N/A	#N/A	0	0	#N/A	#N/A	0	0	#N/A	#N/A	0
hsa-miR-556-5p				0	#N/A	#N/A	#N/A	#N/A	#N/A	0	#N/A	#N/A	0	0	#N/A	#N/A	0	0	#N/A	#N/A	0	0	#N/A	#N/A	0	0	#N/A	#N/A	0	0	#N/A	#N/A	0
hsa-miR-1272				0	#N/A	#N/A	#N/A	#N/A	#N/A	0	#N/A	#N/A	0	0	#N/A	#N/A	0	0	#N/A	#N/A	0	0	#N/A	#N/A	0	0	#N/A	#N/A	0	0	#N/A	#N/A	0
hsa-miR-1322				0	#N/A	#N/A	#N/A	#N/A	#N/A	0	#N/A	#N/A	0	0	#N/A	#N/A	0	0	#N/A	#N/A	0	0	#N/A	#N/A	0	0	#N/A	#N/A	0	0	#N/A	#N/A	0
hsa-miR-4787-3p				0	#N/A	#N/A	#N/A	#N/A	#N/A	0	#N/A	#N/A	0	0	#N/A	#N/A	0	0	#N/A	#N/A	0	0	#N/A	#N/A	0	0	#N/A	#N/A	0	0	#N/A	#N/A	0
hsa-miR-758-5p				0	#N/A	#N/A	#N/A	#N/A	#N/A	0	#N/A	#N/A	0	0	#N/A	#N/A	0	0	#N/A	#N/A	0	0	#N/A	#N/A	0	0	#N/A	#N/A	0	0	#N/A	#N/A	0
hsa-miR-12129				0	#N/A	#N/A	#N/A	#N/A	#N/A	0	#N/A	#N/A	0	0	#N/A	#N/A	0	0	#N/A	#N/A	0	0	#N/A	#N/A	0	0	#N/A	#N/A	0	0	#N/A	#N/A	0
hsa-miR-205-3p				0	#N/A	#N/A	#N/A	#N/A	#N/A	0	#N/A	#N/A	0	0	#N/A	#N/A	0	0	#N/A	#N/A	0	0	#N/A	#N/A	0	0	#N/A	#N/A	0	0	#N/A	#N/A	0
hsa-miR-330-3p				0	#N/A	#N/A	#N/A	#N/A	#N/A	0	#N/A	#N/A	0	0	#N/A	#N/A	0	0	#N/A	#N/A	0	0	#N/A	#N/A	0	0	#N/A	#N/A	0	0	#N/A	#N/A	0
hsa-miR-500b-3p				0	#N/A	#N/A	#N/A	#N/A	#N/A	0	#N/A	#N/A	0	0	#N/A	#N/A	0	0	#N/A	#N/A	0	0	#N/A	#N/A	0	0	#N/A	#N/A	0	0	#N/A	#N/A	0
hsa-miR-3919				0	#N/A	#N/A	#N/A	#N/A	#N/A	0	#N/A	#N/A	0	0	#N/A	#N/A	0	0	#N/A	#N/A	0	0	#N/A	#N/A	0	0	#N/A	#N/A	0	0	#N/A	#N/A	0
hsa-miR-759				0	#N/A	#N/A	#N/A	#N/A	#N/A	0	#N/A	#N/A	0	0	#N/A	#N/A	0	0	#N/A	#N/A	0	0	#N/A	#N/A	0	0	#N/A	#N/A	0	0	#N/A	#N/A	0
hsa-miR-1288-5p				0	#N/A	#N/A	#N/A	#N/A	#N/A	0	#N/A	#N/A	0	0	#N/A	#N/A	0	0	#N/A	#N/A	0	0	#N/A	#N/A	0	0	#N/A	#N/A	0	0	#N/A	#N/A	0
hsa-miR-922				0	#N/A	#N/A	#N/A	#N/A	#N/A	0	#N/A	#N/A	0	0	#N/A	#N/A	0	0	#N/A	#N/A	0	0	#N/A	#N/A	0	0	#N/A	#N/A	0	0	#N/A	#N/A	0
hsa-miR-761				0	#N/A	#N/A	#N/A	#N/A	#N/A	0	#N/A	#N/A	0	0	#N/A	#N/A	0	0	#N/A	#N/A	0	0	#N/A	#N/A	0	0	#N/A	#N/A	0	0	#N/A	#N/A	0
hsa-miR-4310				0	#N/A	#N/A	#N/A	#N/A	#N/A	0	#N/A	#N/A	0	0	#N/A	#N/A	0	0	#N/A	#N/A	0	0	#N/A	#N/A	0	0	#N/A	#N/A	0	0	#N/A	#N/A	0
hsa-miR-4690-3p				0	#N/A	#N/A	#N/A	#N/A	#N/A	0	#N/A	#N/A	0	0	#N/A	#N/A	0	0	#N/A	#N/A	0	0	#N/A	#N/A	0	0	#N/A	#N/A	0	0	#N/A	#N/A	0
hsa-miR-873-5p				0	#N/A	#N/A	#N/A	#N/A	#N/A	0	#N/A	#N/A	0	0	#N/A	#N/A	0	0	#N/A	#N/A	0	0	#N/A	#N/A	0	0	#N/A	#N/A	0	0	#N/A	#N/A	0
hsa-miR-4436a				0	#N/A	#N/A	#N/A	#N/A	#N/A	0	#N/A	#N/A	0	0	#N/A	#N/A	0	0	#N/A	#N/A	0	0	#N/A	#N/A	0	0	#N/A	#N/A	0	0	#N/A	#N/A	0
hsa-miR-4269				0	#N/A	#N/A	#N/A	#N/A	#N/A	0	#N/A	#N/A	0	0	#N/A	#N/A	0	0	#N/A	#N/A	0	0	#N/A	#N/A	0	0	#N/A	#N/A	0	0	#N/A	#N/A	0
hsa-miR-211-3p				0	#N/A	#N/A	#N/A	#N/A	#N/A	0	#N/A	#N/A	0	0	#N/A	#N/A	0	0	#N/A	#N/A	0	0	#N/A	#N/A	0	0	#N/A	#N/A	0	0	#N/A	#N/A	0
hsa-miR-764				0	#N/A	#N/A	#N/A	#N/A	#N/A	0	#N/A	#N/A	0	0	#N/A	#N/A	0	0	#N/A	#N/A	0	0	#N/A	#N/A	0	0	#N/A	#N/A	0	0	#N/A	#N/A	0
hsa-miR-3129-5p				0	#N/A	#N/A	#N/A	#N/A	#N/A	0	#N/A	#N/A	0	0	#N/A	#N/A	0	0	#N/A	#N/A	0	0	#N/A	#N/A	0	0	#N/A	#N/A	0	0	#N/A	#N/A	0
hsa-miR-455-3p				0	#N/A	#N/A	#N/A	#N/A	#N/A	0	#N/A	#N/A	0	0	#N/A	#N/A	0	0	#N/A	#N/A	0	0	#N/A	#N/A	0	0	#N/A	#N/A	0	0	#N/A	#N/A	0
hsa-miR-5693				0	#N/A	#N/A	#N/A	#N/A	#N/A	0	#N/A	#N/A	0	0	#N/A	#N/A	0	0	#N/A	#N/A	0	0	#N/A	#N/A	0	0	#N/A	#N/A	0	0	#N/A	#N/A	0
hsa-miR-4277				0	#N/A	#N/A	#N/A	#N/A	#N/A	0	#N/A	#N/A	0	0	#N/A	#N/A	0	0	#N/A	#N/A	0	0	#N/A	#N/A	0	0	#N/A	#N/A	0	0	#N/A	#N/A	0
hsa-miR-4289				0	#N/A	#N/A	#N/A	#N/A	#N/A	0	#N/A	#N/A	0	0	#N/A	#N/A	0	0	#N/A	#N/A	0	0	#N/A	#N/A	0	0	#N/A	#N/A	0	0	#N/A	#N/A	0
hsa-miR-186-3p				0	#N/A	#N/A	#N/A	#N/A	#N/A	0	#N/A	#N/A	0	0	#N/A	#N/A	0	0	#N/A	#N/A	0	0	#N/A	#N/A	0	0	#N/A	#N/A	0	0	#N/A	#N/A	0
hsa-miR-6840-3p				0	#N/A	#N/A	#N/A	#N/A	#N/A	0	#N/A	#N/A	0	0	#N/A	#N/A	0	0	#N/A	#N/A	0	0	#N/A	#N/A	0	0	#N/A	#N/A	0	0	#N/A	#N/A	0
hsa-miR-4707-5p				0	#N/A	#N/A	#N/A	#N/A	#N/A	0	#N/A	#N/A	0	0	#N/A	#N/A	0	0	#N/A	#N/A	0	0	#N/A	#N/A	0	0	#N/A	#N/A	0	0	#N/A	#N/A	0
hsa-miR-5587-3p				0	#N/A	#N/A	#N/A	#N/A	#N/A	0	#N/A	#N/A	0	0	#N/A	#N/A	0	0	#N/A	#N/A	0	0	#N/A	#N/A	0	0	#N/A	#N/A	0	0	#N/A	#N/A	0
hsa-miR-331-3p				0.666667	4.64641	2.21612	0.408089	0.775924	1	0	#N/A	#N/A	0	0	#N/A	#N/A	0	0	#N/A	#N/A	0	2	#N/A	#N/A	83.5592	0	#N/A	#N/A	0	0	#N/A	#N/A	0
hsa-miR-4740-3p				0	#N/A	#N/A	#N/A	#N/A	#N/A	0	#N/A	#N/A	0	0	#N/A	#N/A	0	0	#N/A	#N/A	0	0	#N/A	#N/A	0	0	#N/A	#N/A	0	0	#N/A	#N/A	0
hsa-miR-1471				0	#N/A	#N/A	#N/A	#N/A	#N/A	0	#N/A	#N/A	0	0	#N/A	#N/A	0	0	#N/A	#N/A	0	0	#N/A	#N/A	0	0	#N/A	#N/A	0	0	#N/A	#N/A	0
hsa-miR-10398-3p				0	#N/A	#N/A	#N/A	#N/A	#N/A	0	#N/A	#N/A	0	0	#N/A	#N/A	0	0	#N/A	#N/A	0	0	#N/A	#N/A	0	0	#N/A	#N/A	0	0	#N/A	#N/A	0
hsa-miR-1470				0	#N/A	#N/A	#N/A	#N/A	#N/A	0	#N/A	#N/A	0	0	#N/A	#N/A	0	0	#N/A	#N/A	0	0	#N/A	#N/A	0	0	#N/A	#N/A	0	0	#N/A	#N/A	0
hsa-miR-2276-5p				0	#N/A	#N/A	#N/A	#N/A	#N/A	0	#N/A	#N/A	0	0	#N/A	#N/A	0	0	#N/A	#N/A	0	0	#N/A	#N/A	0	0	#N/A	#N/A	0	0	#N/A	#N/A	0
hsa-miR-345-3p				0	#N/A	#N/A	#N/A	#N/A	#N/A	0	#N/A	#N/A	0	0	#N/A	#N/A	0	0	#N/A	#N/A	0	0	#N/A	#N/A	0	0	#N/A	#N/A	0	0	#N/A	#N/A	0
hsa-miR-4732-3p				0.333333	2.37694	1.24911	0.637717	#N/A	1	0	#N/A	#N/A	0	0	#N/A	#N/A	0	0	#N/A	#N/A	0	0	#N/A	#N/A	0	0	#N/A	#N/A	0	1	#N/A	#N/A	135.262
hsa-miR-146b-3p				0	#N/A	#N/A	#N/A	#N/A	#N/A	0	#N/A	#N/A	0	0	#N/A	#N/A	0	0	#N/A	#N/A	0	0	#N/A	#N/A	0	0	#N/A	#N/A	0	0	#N/A	#N/A	0
hsa-miR-4442				0	#N/A	#N/A	#N/A	#N/A	#N/A	0	#N/A	#N/A	0	0	#N/A	#N/A	0	0	#N/A	#N/A	0	0	#N/A	#N/A	0	0	#N/A	#N/A	0	0	#N/A	#N/A	0
hsa-miR-6784-5p				0	#N/A	#N/A	#N/A	#N/A	#N/A	0	#N/A	#N/A	0	0	#N/A	#N/A	0	0	#N/A	#N/A	0	0	#N/A	#N/A	0	0	#N/A	#N/A	0	0	#N/A	#N/A	0
hsa-miR-3927-5p				0	#N/A	#N/A	#N/A	#N/A	#N/A	0	#N/A	#N/A	0	0	#N/A	#N/A	0	0	#N/A	#N/A	0	0	#N/A	#N/A	0	0	#N/A	#N/A	0	0	#N/A	#N/A	0
hsa-miR-3183				0	#N/A	#N/A	#N/A	#N/A	#N/A	0	#N/A	#N/A	0	0	#N/A	#N/A	0	0	#N/A	#N/A	0	0	#N/A	#N/A	0	0	#N/A	#N/A	0	0	#N/A	#N/A	0
hsa-miR-370-3p				0.333333	-5.81155	-2.53892	0.373246	#N/A	1	1	#N/A	#N/A	27.9497	0	#N/A	#N/A	0	0	#N/A	#N/A	0	0	#N/A	#N/A	0	0	#N/A	#N/A	0	0	#N/A	#N/A	0
hsa-miR-4254				0	#N/A	#N/A	#N/A	#N/A	#N/A	0	#N/A	#N/A	0	0	#N/A	#N/A	0	0	#N/A	#N/A	0	0	#N/A	#N/A	0	0	#N/A	#N/A	0	0	#N/A	#N/A	0
hsa-miR-320a-5p				0	#N/A	#N/A	#N/A	#N/A	#N/A	0	#N/A	#N/A	0	0	#N/A	#N/A	0	0	#N/A	#N/A	0	0	#N/A	#N/A	0	0	#N/A	#N/A	0	0	#N/A	#N/A	0
hsa-miR-551a				0	#N/A	#N/A	#N/A	#N/A	#N/A	0	#N/A	#N/A	0	0	#N/A	#N/A	0	0	#N/A	#N/A	0	0	#N/A	#N/A	0	0	#N/A	#N/A	0	0	#N/A	#N/A	0
hsa-miR-551b-3p				0	#N/A	#N/A	#N/A	#N/A	#N/A	0	#N/A	#N/A	0	0	#N/A	#N/A	0	0	#N/A	#N/A	0	0	#N/A	#N/A	0	0	#N/A	#N/A	0	0	#N/A	#N/A	0
hsa-miR-375-5p				0	#N/A	#N/A	#N/A	#N/A	#N/A	0	#N/A	#N/A	0	0	#N/A	#N/A	0	0	#N/A	#N/A	0	0	#N/A	#N/A	0	0	#N/A	#N/A	0	0	#N/A	#N/A	0
hsa-miR-4431				0	#N/A	#N/A	#N/A	#N/A	#N/A	0	#N/A	#N/A	0	0	#N/A	#N/A	0	0	#N/A	#N/A	0	0	#N/A	#N/A	0	0	#N/A	#N/A	0	0	#N/A	#N/A	0
hsa-miR-611				0	#N/A	#N/A	#N/A	#N/A	#N/A	0	#N/A	#N/A	0	0	#N/A	#N/A	0	0	#N/A	#N/A	0	0	#N/A	#N/A	0	0	#N/A	#N/A	0	0	#N/A	#N/A	0
hsa-miR-6825-3p				0	#N/A	#N/A	#N/A	#N/A	#N/A	0	#N/A	#N/A	0	0	#N/A	#N/A	0	0	#N/A	#N/A	0	0	#N/A	#N/A	0	0	#N/A	#N/A	0	0	#N/A	#N/A	0
hsa-miR-10392-5p				0	#N/A	#N/A	#N/A	#N/A	#N/A	0	#N/A	#N/A	0	0	#N/A	#N/A	0	0	#N/A	#N/A	0	0	#N/A	#N/A	0	0	#N/A	#N/A	0	0	#N/A	#N/A	0
hsa-miR-6125				0	#N/A	#N/A	#N/A	#N/A	#N/A	0	#N/A	#N/A	0	0	#N/A	#N/A	0	0	#N/A	#N/A	0	0	#N/A	#N/A	0	0	#N/A	#N/A	0	0	#N/A	#N/A	0
hsa-miR-5739				0	#N/A	#N/A	#N/A	#N/A	#N/A	0	#N/A	#N/A	0	0	#N/A	#N/A	0	0	#N/A	#N/A	0	0	#N/A	#N/A	0	0	#N/A	#N/A	0	0	#N/A	#N/A	0
hsa-miR-4285				0	#N/A	#N/A	#N/A	#N/A	#N/A	0	#N/A	#N/A	0	0	#N/A	#N/A	0	0	#N/A	#N/A	0	0	#N/A	#N/A	0	0	#N/A	#N/A	0	0	#N/A	#N/A	0
hsa-miR-4508				0	#N/A	#N/A	#N/A	#N/A	#N/A	0	#N/A	#N/A	0	0	#N/A	#N/A	0	0	#N/A	#N/A	0	0	#N/A	#N/A	0	0	#N/A	#N/A	0	0	#N/A	#N/A	0
hsa-miR-4787-5p				0	#N/A	#N/A	#N/A	#N/A	#N/A	0	#N/A	#N/A	0	0	#N/A	#N/A	0	0	#N/A	#N/A	0	0	#N/A	#N/A	0	0	#N/A	#N/A	0	0	#N/A	#N/A	0
hsa-miR-598-5p				0	#N/A	#N/A	#N/A	#N/A	#N/A	0	#N/A	#N/A	0	0	#N/A	#N/A	0	0	#N/A	#N/A	0	0	#N/A	#N/A	0	0	#N/A	#N/A	0	0	#N/A	#N/A	0
hsa-miR-6786-5p				0	#N/A	#N/A	#N/A	#N/A	#N/A	0	#N/A	#N/A	0	0	#N/A	#N/A	0	0	#N/A	#N/A	0	0	#N/A	#N/A	0	0	#N/A	#N/A	0	0	#N/A	#N/A	0
hsa-miR-4521				0	#N/A	#N/A	#N/A	#N/A	#N/A	0	#N/A	#N/A	0	0	#N/A	#N/A	0	0	#N/A	#N/A	0	0	#N/A	#N/A	0	0	#N/A	#N/A	0	0	#N/A	#N/A	0
hsa-miR-138-1-3p				0	#N/A	#N/A	#N/A	#N/A	#N/A	0	#N/A	#N/A	0	0	#N/A	#N/A	0	0	#N/A	#N/A	0	0	#N/A	#N/A	0	0	#N/A	#N/A	0	0	#N/A	#N/A	0
hsa-miR-554				0	#N/A	#N/A	#N/A	#N/A	#N/A	0	#N/A	#N/A	0	0	#N/A	#N/A	0	0	#N/A	#N/A	0	0	#N/A	#N/A	0	0	#N/A	#N/A	0	0	#N/A	#N/A	0
hsa-miR-138-2-3p				0	#N/A	#N/A	#N/A	#N/A	#N/A	0	#N/A	#N/A	0	0	#N/A	#N/A	0	0	#N/A	#N/A	0	0	#N/A	#N/A	0	0	#N/A	#N/A	0	0	#N/A	#N/A	0
hsa-miR-4518				0	#N/A	#N/A	#N/A	#N/A	#N/A	0	#N/A	#N/A	0	0	#N/A	#N/A	0	0	#N/A	#N/A	0	0	#N/A	#N/A	0	0	#N/A	#N/A	0	0	#N/A	#N/A	0
hsa-miR-6870-3p				0	#N/A	#N/A	#N/A	#N/A	#N/A	0	#N/A	#N/A	0	0	#N/A	#N/A	0	0	#N/A	#N/A	0	0	#N/A	#N/A	0	0	#N/A	#N/A	0	0	#N/A	#N/A	0
hsa-miR-4469				0	#N/A	#N/A	#N/A	#N/A	#N/A	0	#N/A	#N/A	0	0	#N/A	#N/A	0	0	#N/A	#N/A	0	0	#N/A	#N/A	0	0	#N/A	#N/A	0	0	#N/A	#N/A	0
hsa-miR-3917				0	#N/A	#N/A	#N/A	#N/A	#N/A	0	#N/A	#N/A	0	0	#N/A	#N/A	0	0	#N/A	#N/A	0	0	#N/A	#N/A	0	0	#N/A	#N/A	0	0	#N/A	#N/A	0
hsa-miR-301b-5p				0	#N/A	#N/A	#N/A	#N/A	#N/A	0	#N/A	#N/A	0	0	#N/A	#N/A	0	0	#N/A	#N/A	0	0	#N/A	#N/A	0	0	#N/A	#N/A	0	0	#N/A	#N/A	0
hsa-miR-301a-5p				0	#N/A	#N/A	#N/A	#N/A	#N/A	0	#N/A	#N/A	0	0	#N/A	#N/A	0	0	#N/A	#N/A	0	0	#N/A	#N/A	0	0	#N/A	#N/A	0	0	#N/A	#N/A	0
hsa-miR-130a-5p				0	#N/A	#N/A	#N/A	#N/A	#N/A	0	#N/A	#N/A	0	0	#N/A	#N/A	0	0	#N/A	#N/A	0	0	#N/A	#N/A	0	0	#N/A	#N/A	0	0	#N/A	#N/A	0
hsa-miR-4539				0	#N/A	#N/A	#N/A	#N/A	#N/A	0	#N/A	#N/A	0	0	#N/A	#N/A	0	0	#N/A	#N/A	0	0	#N/A	#N/A	0	0	#N/A	#N/A	0	0	#N/A	#N/A	0
hsa-miR-4526				0	#N/A	#N/A	#N/A	#N/A	#N/A	0	#N/A	#N/A	0	0	#N/A	#N/A	0	0	#N/A	#N/A	0	0	#N/A	#N/A	0	0	#N/A	#N/A	0	0	#N/A	#N/A	0
hsa-miR-345-5p				0.666667	-1.32762	-0.408847	0.826395	0.96669	1	2	#N/A	#N/A	55.8994	0	#N/A	#N/A	0	0	#N/A	#N/A	0	1	#N/A	#N/A	41.7796	0	#N/A	#N/A	0	1	#N/A	#N/A	135.262
hsa-miR-4502				0	#N/A	#N/A	#N/A	#N/A	#N/A	0	#N/A	#N/A	0	0	#N/A	#N/A	0	0	#N/A	#N/A	0	0	#N/A	#N/A	0	0	#N/A	#N/A	0	0	#N/A	#N/A	0
hsa-miR-3130-3p				0	#N/A	#N/A	#N/A	#N/A	#N/A	0	#N/A	#N/A	0	0	#N/A	#N/A	0	0	#N/A	#N/A	0	0	#N/A	#N/A	0	0	#N/A	#N/A	0	0	#N/A	#N/A	0
hsa-miR-191-3p				0	#N/A	#N/A	#N/A	#N/A	#N/A	0	#N/A	#N/A	0	0	#N/A	#N/A	0	0	#N/A	#N/A	0	0	#N/A	#N/A	0	0	#N/A	#N/A	0	0	#N/A	#N/A	0
hsa-miR-4734				0	#N/A	#N/A	#N/A	#N/A	#N/A	0	#N/A	#N/A	0	0	#N/A	#N/A	0	0	#N/A	#N/A	0	0	#N/A	#N/A	0	0	#N/A	#N/A	0	0	#N/A	#N/A	0
hsa-miR-204-3p				0	#N/A	#N/A	#N/A	#N/A	#N/A	0	#N/A	#N/A	0	0	#N/A	#N/A	0	0	#N/A	#N/A	0	0	#N/A	#N/A	0	0	#N/A	#N/A	0	0	#N/A	#N/A	0
hsa-miR-619-5p				0	#N/A	#N/A	#N/A	#N/A	#N/A	0	#N/A	#N/A	0	0	#N/A	#N/A	0	0	#N/A	#N/A	0	0	#N/A	#N/A	0	0	#N/A	#N/A	0	0	#N/A	#N/A	0
hsa-miR-612				0	#N/A	#N/A	#N/A	#N/A	#N/A	0	#N/A	#N/A	0	0	#N/A	#N/A	0	0	#N/A	#N/A	0	0	#N/A	#N/A	0	0	#N/A	#N/A	0	0	#N/A	#N/A	0
hsa-miR-4486				0	#N/A	#N/A	#N/A	#N/A	#N/A	0	#N/A	#N/A	0	0	#N/A	#N/A	0	0	#N/A	#N/A	0	0	#N/A	#N/A	0	0	#N/A	#N/A	0	0	#N/A	#N/A	0
hsa-miR-3663-5p				0	#N/A	#N/A	#N/A	#N/A	#N/A	0	#N/A	#N/A	0	0	#N/A	#N/A	0	0	#N/A	#N/A	0	0	#N/A	#N/A	0	0	#N/A	#N/A	0	0	#N/A	#N/A	0
hsa-miR-4299				0	#N/A	#N/A	#N/A	#N/A	#N/A	0	#N/A	#N/A	0	0	#N/A	#N/A	0	0	#N/A	#N/A	0	0	#N/A	#N/A	0	0	#N/A	#N/A	0	0	#N/A	#N/A	0
hsa-miR-548q				0	#N/A	#N/A	#N/A	#N/A	#N/A	0	#N/A	#N/A	0	0	#N/A	#N/A	0	0	#N/A	#N/A	0	0	#N/A	#N/A	0	0	#N/A	#N/A	0	0	#N/A	#N/A	0
hsa-miR-29b-1-5p				0	#N/A	#N/A	#N/A	#N/A	#N/A	0	#N/A	#N/A	0	0	#N/A	#N/A	0	0	#N/A	#N/A	0	0	#N/A	#N/A	0	0	#N/A	#N/A	0	0	#N/A	#N/A	0
hsa-miR-3182				0	#N/A	#N/A	#N/A	#N/A	#N/A	0	#N/A	#N/A	0	0	#N/A	#N/A	0	0	#N/A	#N/A	0	0	#N/A	#N/A	0	0	#N/A	#N/A	0	0	#N/A	#N/A	0
hsa-miR-3655				0	#N/A	#N/A	#N/A	#N/A	#N/A	0	#N/A	#N/A	0	0	#N/A	#N/A	0	0	#N/A	#N/A	0	0	#N/A	#N/A	0	0	#N/A	#N/A	0	0	#N/A	#N/A	0
hsa-miR-1180-5p				0	#N/A	#N/A	#N/A	#N/A	#N/A	0	#N/A	#N/A	0	0	#N/A	#N/A	0	0	#N/A	#N/A	0	0	#N/A	#N/A	0	0	#N/A	#N/A	0	0	#N/A	#N/A	0
hsa-miR-539-5p				0	#N/A	#N/A	#N/A	#N/A	#N/A	0	#N/A	#N/A	0	0	#N/A	#N/A	0	0	#N/A	#N/A	0	0	#N/A	#N/A	0	0	#N/A	#N/A	0	0	#N/A	#N/A	0
hsa-miR-873-3p				0	#N/A	#N/A	#N/A	#N/A	#N/A	0	#N/A	#N/A	0	0	#N/A	#N/A	0	0	#N/A	#N/A	0	0	#N/A	#N/A	0	0	#N/A	#N/A	0	0	#N/A	#N/A	0
hsa-miR-3928-3p				0	#N/A	#N/A	#N/A	#N/A	#N/A	0	#N/A	#N/A	0	0	#N/A	#N/A	0	0	#N/A	#N/A	0	0	#N/A	#N/A	0	0	#N/A	#N/A	0	0	#N/A	#N/A	0
hsa-miR-6089				0	#N/A	#N/A	#N/A	#N/A	#N/A	0	#N/A	#N/A	0	0	#N/A	#N/A	0	0	#N/A	#N/A	0	0	#N/A	#N/A	0	0	#N/A	#N/A	0	0	#N/A	#N/A	0
hsa-miR-3197				0	#N/A	#N/A	#N/A	#N/A	#N/A	0	#N/A	#N/A	0	0	#N/A	#N/A	0	0	#N/A	#N/A	0	0	#N/A	#N/A	0	0	#N/A	#N/A	0	0	#N/A	#N/A	0
hsa-miR-1914-3p				0	#N/A	#N/A	#N/A	#N/A	#N/A	0	#N/A	#N/A	0	0	#N/A	#N/A	0	0	#N/A	#N/A	0	0	#N/A	#N/A	0	0	#N/A	#N/A	0	0	#N/A	#N/A	0
hsa-miR-6086				0	#N/A	#N/A	#N/A	#N/A	#N/A	0	#N/A	#N/A	0	0	#N/A	#N/A	0	0	#N/A	#N/A	0	0	#N/A	#N/A	0	0	#N/A	#N/A	0	0	#N/A	#N/A	0
hsa-miR-4481				0	#N/A	#N/A	#N/A	#N/A	#N/A	0	#N/A	#N/A	0	0	#N/A	#N/A	0	0	#N/A	#N/A	0	0	#N/A	#N/A	0	0	#N/A	#N/A	0	0	#N/A	#N/A	0
hsa-miR-144-5p				0	#N/A	#N/A	#N/A	#N/A	#N/A	0	#N/A	#N/A	0	0	#N/A	#N/A	0	0	#N/A	#N/A	0	0	#N/A	#N/A	0	0	#N/A	#N/A	0	0	#N/A	#N/A	0
hsa-miR-4454				0	#N/A	#N/A	#N/A	#N/A	#N/A	0	#N/A	#N/A	0	0	#N/A	#N/A	0	0	#N/A	#N/A	0	0	#N/A	#N/A	0	0	#N/A	#N/A	0	0	#N/A	#N/A	0
hsa-miR-4534				0	#N/A	#N/A	#N/A	#N/A	#N/A	0	#N/A	#N/A	0	0	#N/A	#N/A	0	0	#N/A	#N/A	0	0	#N/A	#N/A	0	0	#N/A	#N/A	0	0	#N/A	#N/A	0
hsa-miR-8069				0	#N/A	#N/A	#N/A	#N/A	#N/A	0	#N/A	#N/A	0	0	#N/A	#N/A	0	0	#N/A	#N/A	0	0	#N/A	#N/A	0	0	#N/A	#N/A	0	0	#N/A	#N/A	0
hsa-miR-145-3p				0	#N/A	#N/A	#N/A	#N/A	#N/A	0	#N/A	#N/A	0	0	#N/A	#N/A	0	0	#N/A	#N/A	0	0	#N/A	#N/A	0	0	#N/A	#N/A	0	0	#N/A	#N/A	0
hsa-miR-4722-5p				0	#N/A	#N/A	#N/A	#N/A	#N/A	0	#N/A	#N/A	0	0	#N/A	#N/A	0	0	#N/A	#N/A	0	0	#N/A	#N/A	0	0	#N/A	#N/A	0	0	#N/A	#N/A	0
hsa-miR-657				0	#N/A	#N/A	#N/A	#N/A	#N/A	0	#N/A	#N/A	0	0	#N/A	#N/A	0	0	#N/A	#N/A	0	0	#N/A	#N/A	0	0	#N/A	#N/A	0	0	#N/A	#N/A	0
hsa-miR-4252				0	#N/A	#N/A	#N/A	#N/A	#N/A	0	#N/A	#N/A	0	0	#N/A	#N/A	0	0	#N/A	#N/A	0	0	#N/A	#N/A	0	0	#N/A	#N/A	0	0	#N/A	#N/A	0
hsa-miR-3194-5p				0	#N/A	#N/A	#N/A	#N/A	#N/A	0	#N/A	#N/A	0	0	#N/A	#N/A	0	0	#N/A	#N/A	0	0	#N/A	#N/A	0	0	#N/A	#N/A	0	0	#N/A	#N/A	0
hsa-miR-10396b-3p				0	#N/A	#N/A	#N/A	#N/A	#N/A	0	#N/A	#N/A	0	0	#N/A	#N/A	0	0	#N/A	#N/A	0	0	#N/A	#N/A	0	0	#N/A	#N/A	0	0	#N/A	#N/A	0
hsa-miR-10396a-3p				0	#N/A	#N/A	#N/A	#N/A	#N/A	0	#N/A	#N/A	0	0	#N/A	#N/A	0	0	#N/A	#N/A	0	0	#N/A	#N/A	0	0	#N/A	#N/A	0	0	#N/A	#N/A	0
hsa-miR-4312				0	#N/A	#N/A	#N/A	#N/A	#N/A	0	#N/A	#N/A	0	0	#N/A	#N/A	0	0	#N/A	#N/A	0	0	#N/A	#N/A	0	0	#N/A	#N/A	0	0	#N/A	#N/A	0
hsa-miR-1273c				0	#N/A	#N/A	#N/A	#N/A	#N/A	0	#N/A	#N/A	0	0	#N/A	#N/A	0	0	#N/A	#N/A	0	0	#N/A	#N/A	0	0	#N/A	#N/A	0	0	#N/A	#N/A	0
hsa-miR-4783-5p				0	#N/A	#N/A	#N/A	#N/A	#N/A	0	#N/A	#N/A	0	0	#N/A	#N/A	0	0	#N/A	#N/A	0	0	#N/A	#N/A	0	0	#N/A	#N/A	0	0	#N/A	#N/A	0
hsa-miR-658				0	#N/A	#N/A	#N/A	#N/A	#N/A	0	#N/A	#N/A	0	0	#N/A	#N/A	0	0	#N/A	#N/A	0	0	#N/A	#N/A	0	0	#N/A	#N/A	0	0	#N/A	#N/A	0
hsa-miR-3960				0	#N/A	#N/A	#N/A	#N/A	#N/A	0	#N/A	#N/A	0	0	#N/A	#N/A	0	0	#N/A	#N/A	0	0	#N/A	#N/A	0	0	#N/A	#N/A	0	0	#N/A	#N/A	0
hsa-miR-8072				0	#N/A	#N/A	#N/A	#N/A	#N/A	0	#N/A	#N/A	0	0	#N/A	#N/A	0	0	#N/A	#N/A	0	0	#N/A	#N/A	0	0	#N/A	#N/A	0	0	#N/A	#N/A	0
hsa-miR-10396a-5p				0	#N/A	#N/A	#N/A	#N/A	#N/A	0	#N/A	#N/A	0	0	#N/A	#N/A	0	0	#N/A	#N/A	0	0	#N/A	#N/A	0	0	#N/A	#N/A	0	0	#N/A	#N/A	0
hsa-miR-187-5p				0	#N/A	#N/A	#N/A	#N/A	#N/A	0	#N/A	#N/A	0	0	#N/A	#N/A	0	0	#N/A	#N/A	0	0	#N/A	#N/A	0	0	#N/A	#N/A	0	0	#N/A	#N/A	0
hsa-miR-621				0	#N/A	#N/A	#N/A	#N/A	#N/A	0	#N/A	#N/A	0	0	#N/A	#N/A	0	0	#N/A	#N/A	0	0	#N/A	#N/A	0	0	#N/A	#N/A	0	0	#N/A	#N/A	0
hsa-miR-7158-5p				0	#N/A	#N/A	#N/A	#N/A	#N/A	0	#N/A	#N/A	0	0	#N/A	#N/A	0	0	#N/A	#N/A	0	0	#N/A	#N/A	0	0	#N/A	#N/A	0	0	#N/A	#N/A	0
hsa-miR-6847-3p				0	#N/A	#N/A	#N/A	#N/A	#N/A	0	#N/A	#N/A	0	0	#N/A	#N/A	0	0	#N/A	#N/A	0	0	#N/A	#N/A	0	0	#N/A	#N/A	0	0	#N/A	#N/A	0
hsa-miR-4268				0	#N/A	#N/A	#N/A	#N/A	#N/A	0	#N/A	#N/A	0	0	#N/A	#N/A	0	0	#N/A	#N/A	0	0	#N/A	#N/A	0	0	#N/A	#N/A	0	0	#N/A	#N/A	0
hsa-miR-4448				0	#N/A	#N/A	#N/A	#N/A	#N/A	0	#N/A	#N/A	0	0	#N/A	#N/A	0	0	#N/A	#N/A	0	0	#N/A	#N/A	0	0	#N/A	#N/A	0	0	#N/A	#N/A	0
hsa-miR-8077				0	#N/A	#N/A	#N/A	#N/A	#N/A	0	#N/A	#N/A	0	0	#N/A	#N/A	0	0	#N/A	#N/A	0	0	#N/A	#N/A	0	0	#N/A	#N/A	0	0	#N/A	#N/A	0
hsa-miR-3135b				1268.67	-4.64065	-2.21433	0.393842	0.775924	1	1611	#N/A	#N/A	45027	0	#N/A	#N/A	0	2195	#N/A	#N/A	78284.9	636	#N/A	#N/A	26571.8	0	#N/A	#N/A	0	0	#N/A	#N/A	0
hsa-miR-5589-5p				0	#N/A	#N/A	#N/A	#N/A	#N/A	0	#N/A	#N/A	0	0	#N/A	#N/A	0	0	#N/A	#N/A	0	0	#N/A	#N/A	0	0	#N/A	#N/A	0	0	#N/A	#N/A	0
hsa-miR-6131				0	#N/A	#N/A	#N/A	#N/A	#N/A	0	#N/A	#N/A	0	0	#N/A	#N/A	0	0	#N/A	#N/A	0	0	#N/A	#N/A	0	0	#N/A	#N/A	0	0	#N/A	#N/A	0
hsa-miR-103a-1-5p				0	#N/A	#N/A	#N/A	#N/A	#N/A	0	#N/A	#N/A	0	0	#N/A	#N/A	0	0	#N/A	#N/A	0	0	#N/A	#N/A	0	0	#N/A	#N/A	0	0	#N/A	#N/A	0
hsa-miR-4327				0	#N/A	#N/A	#N/A	#N/A	#N/A	0	#N/A	#N/A	0	0	#N/A	#N/A	0	0	#N/A	#N/A	0	0	#N/A	#N/A	0	0	#N/A	#N/A	0	0	#N/A	#N/A	0
hsa-miR-3160-5p				0	#N/A	#N/A	#N/A	#N/A	#N/A	0	#N/A	#N/A	0	0	#N/A	#N/A	0	0	#N/A	#N/A	0	0	#N/A	#N/A	0	0	#N/A	#N/A	0	0	#N/A	#N/A	0
hsa-miR-6124				0	#N/A	#N/A	#N/A	#N/A	#N/A	0	#N/A	#N/A	0	0	#N/A	#N/A	0	0	#N/A	#N/A	0	0	#N/A	#N/A	0	0	#N/A	#N/A	0	0	#N/A	#N/A	0
hsa-miR-6077				0	#N/A	#N/A	#N/A	#N/A	#N/A	0	#N/A	#N/A	0	0	#N/A	#N/A	0	0	#N/A	#N/A	0	0	#N/A	#N/A	0	0	#N/A	#N/A	0	0	#N/A	#N/A	0
hsa-miR-3619-3p				0	#N/A	#N/A	#N/A	#N/A	#N/A	0	#N/A	#N/A	0	0	#N/A	#N/A	0	0	#N/A	#N/A	0	0	#N/A	#N/A	0	0	#N/A	#N/A	0	0	#N/A	#N/A	0
hsa-miR-711				0	#N/A	#N/A	#N/A	#N/A	#N/A	0	#N/A	#N/A	0	0	#N/A	#N/A	0	0	#N/A	#N/A	0	0	#N/A	#N/A	0	0	#N/A	#N/A	0	0	#N/A	#N/A	0
hsa-miR-6503-3p				0	#N/A	#N/A	#N/A	#N/A	#N/A	0	#N/A	#N/A	0	0	#N/A	#N/A	0	0	#N/A	#N/A	0	0	#N/A	#N/A	0	0	#N/A	#N/A	0	0	#N/A	#N/A	0
hsa-miR-4516				0	#N/A	#N/A	#N/A	#N/A	#N/A	0	#N/A	#N/A	0	0	#N/A	#N/A	0	0	#N/A	#N/A	0	0	#N/A	#N/A	0	0	#N/A	#N/A	0	0	#N/A	#N/A	0
hsa-miR-505-5p				0	#N/A	#N/A	#N/A	#N/A	#N/A	0	#N/A	#N/A	0	0	#N/A	#N/A	0	0	#N/A	#N/A	0	0	#N/A	#N/A	0	0	#N/A	#N/A	0	0	#N/A	#N/A	0
hsa-miR-3689d				0	#N/A	#N/A	#N/A	#N/A	#N/A	0	#N/A	#N/A	0	0	#N/A	#N/A	0	0	#N/A	#N/A	0	0	#N/A	#N/A	0	0	#N/A	#N/A	0	0	#N/A	#N/A	0
hsa-miR-4294				0	#N/A	#N/A	#N/A	#N/A	#N/A	0	#N/A	#N/A	0	0	#N/A	#N/A	0	0	#N/A	#N/A	0	0	#N/A	#N/A	0	0	#N/A	#N/A	0	0	#N/A	#N/A	0
hsa-miR-504-3p				0	#N/A	#N/A	#N/A	#N/A	#N/A	0	#N/A	#N/A	0	0	#N/A	#N/A	0	0	#N/A	#N/A	0	0	#N/A	#N/A	0	0	#N/A	#N/A	0	0	#N/A	#N/A	0
hsa-miR-3201				0	#N/A	#N/A	#N/A	#N/A	#N/A	0	#N/A	#N/A	0	0	#N/A	#N/A	0	0	#N/A	#N/A	0	0	#N/A	#N/A	0	0	#N/A	#N/A	0	0	#N/A	#N/A	0
hsa-miR-1193				0	#N/A	#N/A	#N/A	#N/A	#N/A	0	#N/A	#N/A	0	0	#N/A	#N/A	0	0	#N/A	#N/A	0	0	#N/A	#N/A	0	0	#N/A	#N/A	0	0	#N/A	#N/A	0
hsa-miR-4320				0	#N/A	#N/A	#N/A	#N/A	#N/A	0	#N/A	#N/A	0	0	#N/A	#N/A	0	0	#N/A	#N/A	0	0	#N/A	#N/A	0	0	#N/A	#N/A	0	0	#N/A	#N/A	0
hsa-miR-6744-3p				0	#N/A	#N/A	#N/A	#N/A	#N/A	0	#N/A	#N/A	0	0	#N/A	#N/A	0	0	#N/A	#N/A	0	0	#N/A	#N/A	0	0	#N/A	#N/A	0	0	#N/A	#N/A	0
hsa-miR-6069				0	#N/A	#N/A	#N/A	#N/A	#N/A	0	#N/A	#N/A	0	0	#N/A	#N/A	0	0	#N/A	#N/A	0	0	#N/A	#N/A	0	0	#N/A	#N/A	0	0	#N/A	#N/A	0
hsa-miR-4284				0	#N/A	#N/A	#N/A	#N/A	#N/A	0	#N/A	#N/A	0	0	#N/A	#N/A	0	0	#N/A	#N/A	0	0	#N/A	#N/A	0	0	#N/A	#N/A	0	0	#N/A	#N/A	0
hsa-miR-5787				0	#N/A	#N/A	#N/A	#N/A	#N/A	0	#N/A	#N/A	0	0	#N/A	#N/A	0	0	#N/A	#N/A	0	0	#N/A	#N/A	0	0	#N/A	#N/A	0	0	#N/A	#N/A	0
hsa-miR-3153				0	#N/A	#N/A	#N/A	#N/A	#N/A	0	#N/A	#N/A	0	0	#N/A	#N/A	0	0	#N/A	#N/A	0	0	#N/A	#N/A	0	0	#N/A	#N/A	0	0	#N/A	#N/A	0
hsa-miR-8059				0	#N/A	#N/A	#N/A	#N/A	#N/A	0	#N/A	#N/A	0	0	#N/A	#N/A	0	0	#N/A	#N/A	0	0	#N/A	#N/A	0	0	#N/A	#N/A	0	0	#N/A	#N/A	0
hsa-miR-6090				0	#N/A	#N/A	#N/A	#N/A	#N/A	0	#N/A	#N/A	0	0	#N/A	#N/A	0	0	#N/A	#N/A	0	0	#N/A	#N/A	0	0	#N/A	#N/A	0	0	#N/A	#N/A	0
hsa-miR-920				0	#N/A	#N/A	#N/A	#N/A	#N/A	0	#N/A	#N/A	0	0	#N/A	#N/A	0	0	#N/A	#N/A	0	0	#N/A	#N/A	0	0	#N/A	#N/A	0	0	#N/A	#N/A	0
hsa-miR-6799-5p				0	#N/A	#N/A	#N/A	#N/A	#N/A	0	#N/A	#N/A	0	0	#N/A	#N/A	0	0	#N/A	#N/A	0	0	#N/A	#N/A	0	0	#N/A	#N/A	0	0	#N/A	#N/A	0
hsa-miR-2861				0	#N/A	#N/A	#N/A	#N/A	#N/A	0	#N/A	#N/A	0	0	#N/A	#N/A	0	0	#N/A	#N/A	0	0	#N/A	#N/A	0	0	#N/A	#N/A	0	0	#N/A	#N/A	0
hsa-miR-3178				0	#N/A	#N/A	#N/A	#N/A	#N/A	0	#N/A	#N/A	0	0	#N/A	#N/A	0	0	#N/A	#N/A	0	0	#N/A	#N/A	0	0	#N/A	#N/A	0	0	#N/A	#N/A	0
hsa-miR-4492				0	#N/A	#N/A	#N/A	#N/A	#N/A	0	#N/A	#N/A	0	0	#N/A	#N/A	0	0	#N/A	#N/A	0	0	#N/A	#N/A	0	0	#N/A	#N/A	0	0	#N/A	#N/A	0
hsa-miR-762				0	#N/A	#N/A	#N/A	#N/A	#N/A	0	#N/A	#N/A	0	0	#N/A	#N/A	0	0	#N/A	#N/A	0	0	#N/A	#N/A	0	0	#N/A	#N/A	0	0	#N/A	#N/A	0
hsa-miR-4675				0	#N/A	#N/A	#N/A	#N/A	#N/A	0	#N/A	#N/A	0	0	#N/A	#N/A	0	0	#N/A	#N/A	0	0	#N/A	#N/A	0	0	#N/A	#N/A	0	0	#N/A	#N/A	0
hsa-miR-4271				0	#N/A	#N/A	#N/A	#N/A	#N/A	0	#N/A	#N/A	0	0	#N/A	#N/A	0	0	#N/A	#N/A	0	0	#N/A	#N/A	0	0	#N/A	#N/A	0	0	#N/A	#N/A	0
hsa-miR-128-2-5p				0	#N/A	#N/A	#N/A	#N/A	#N/A	0	#N/A	#N/A	0	0	#N/A	#N/A	0	0	#N/A	#N/A	0	0	#N/A	#N/A	0	0	#N/A	#N/A	0	0	#N/A	#N/A	0
hsa-miR-4525				0	#N/A	#N/A	#N/A	#N/A	#N/A	0	#N/A	#N/A	0	0	#N/A	#N/A	0	0	#N/A	#N/A	0	0	#N/A	#N/A	0	0	#N/A	#N/A	0	0	#N/A	#N/A	0
hsa-miR-328-5p				0	#N/A	#N/A	#N/A	#N/A	#N/A	0	#N/A	#N/A	0	0	#N/A	#N/A	0	0	#N/A	#N/A	0	0	#N/A	#N/A	0	0	#N/A	#N/A	0	0	#N/A	#N/A	0
hsa-miR-6752-5p				0	#N/A	#N/A	#N/A	#N/A	#N/A	0	#N/A	#N/A	0	0	#N/A	#N/A	0	0	#N/A	#N/A	0	0	#N/A	#N/A	0	0	#N/A	#N/A	0	0	#N/A	#N/A	0
hsa-miR-615-5p				0	#N/A	#N/A	#N/A	#N/A	#N/A	0	#N/A	#N/A	0	0	#N/A	#N/A	0	0	#N/A	#N/A	0	0	#N/A	#N/A	0	0	#N/A	#N/A	0	0	#N/A	#N/A	0
hsa-miR-503-3p				0	#N/A	#N/A	#N/A	#N/A	#N/A	0	#N/A	#N/A	0	0	#N/A	#N/A	0	0	#N/A	#N/A	0	0	#N/A	#N/A	0	0	#N/A	#N/A	0	0	#N/A	#N/A	0
hsa-miR-4483				0	#N/A	#N/A	#N/A	#N/A	#N/A	0	#N/A	#N/A	0	0	#N/A	#N/A	0	0	#N/A	#N/A	0	0	#N/A	#N/A	0	0	#N/A	#N/A	0	0	#N/A	#N/A	0
hsa-miR-23a-5p				0	#N/A	#N/A	#N/A	#N/A	#N/A	0	#N/A	#N/A	0	0	#N/A	#N/A	0	0	#N/A	#N/A	0	0	#N/A	#N/A	0	0	#N/A	#N/A	0	0	#N/A	#N/A	0
hsa-miR-4281				0	#N/A	#N/A	#N/A	#N/A	#N/A	0	#N/A	#N/A	0	0	#N/A	#N/A	0	0	#N/A	#N/A	0	0	#N/A	#N/A	0	0	#N/A	#N/A	0	0	#N/A	#N/A	0
hsa-miR-4710				0	#N/A	#N/A	#N/A	#N/A	#N/A	0	#N/A	#N/A	0	0	#N/A	#N/A	0	0	#N/A	#N/A	0	0	#N/A	#N/A	0	0	#N/A	#N/A	0	0	#N/A	#N/A	0
hsa-miR-4466				0	#N/A	#N/A	#N/A	#N/A	#N/A	0	#N/A	#N/A	0	0	#N/A	#N/A	0	0	#N/A	#N/A	0	0	#N/A	#N/A	0	0	#N/A	#N/A	0	0	#N/A	#N/A	0
hsa-miR-92a-2-5p				0	#N/A	#N/A	#N/A	#N/A	#N/A	0	#N/A	#N/A	0	0	#N/A	#N/A	0	0	#N/A	#N/A	0	0	#N/A	#N/A	0	0	#N/A	#N/A	0	0	#N/A	#N/A	0
hsa-miR-5087				0	#N/A	#N/A	#N/A	#N/A	#N/A	0	#N/A	#N/A	0	0	#N/A	#N/A	0	0	#N/A	#N/A	0	0	#N/A	#N/A	0	0	#N/A	#N/A	0	0	#N/A	#N/A	0
hsa-miR-376a-2-5p				0	#N/A	#N/A	#N/A	#N/A	#N/A	0	#N/A	#N/A	0	0	#N/A	#N/A	0	0	#N/A	#N/A	0	0	#N/A	#N/A	0	0	#N/A	#N/A	0	0	#N/A	#N/A	0
hsa-miR-6073				0	#N/A	#N/A	#N/A	#N/A	#N/A	0	#N/A	#N/A	0	0	#N/A	#N/A	0	0	#N/A	#N/A	0	0	#N/A	#N/A	0	0	#N/A	#N/A	0	0	#N/A	#N/A	0
hsa-miR-3713				0	#N/A	#N/A	#N/A	#N/A	#N/A	0	#N/A	#N/A	0	0	#N/A	#N/A	0	0	#N/A	#N/A	0	0	#N/A	#N/A	0	0	#N/A	#N/A	0	0	#N/A	#N/A	0
hsa-miR-198				0	#N/A	#N/A	#N/A	#N/A	#N/A	0	#N/A	#N/A	0	0	#N/A	#N/A	0	0	#N/A	#N/A	0	0	#N/A	#N/A	0	0	#N/A	#N/A	0	0	#N/A	#N/A	0
hsa-miR-489-5p				0	#N/A	#N/A	#N/A	#N/A	#N/A	0	#N/A	#N/A	0	0	#N/A	#N/A	0	0	#N/A	#N/A	0	0	#N/A	#N/A	0	0	#N/A	#N/A	0	0	#N/A	#N/A	0
hsa-miR-8078				0	#N/A	#N/A	#N/A	#N/A	#N/A	0	#N/A	#N/A	0	0	#N/A	#N/A	0	0	#N/A	#N/A	0	0	#N/A	#N/A	0	0	#N/A	#N/A	0	0	#N/A	#N/A	0
hsa-miR-4316				0	#N/A	#N/A	#N/A	#N/A	#N/A	0	#N/A	#N/A	0	0	#N/A	#N/A	0	0	#N/A	#N/A	0	0	#N/A	#N/A	0	0	#N/A	#N/A	0	0	#N/A	#N/A	0
hsa-miR-143-5p				0	#N/A	#N/A	#N/A	#N/A	#N/A	0	#N/A	#N/A	0	0	#N/A	#N/A	0	0	#N/A	#N/A	0	0	#N/A	#N/A	0	0	#N/A	#N/A	0	0	#N/A	#N/A	0
hsa-miR-376c-5p				0	#N/A	#N/A	#N/A	#N/A	#N/A	0	#N/A	#N/A	0	0	#N/A	#N/A	0	0	#N/A	#N/A	0	0	#N/A	#N/A	0	0	#N/A	#N/A	0	0	#N/A	#N/A	0
hsa-miR-663b				0	#N/A	#N/A	#N/A	#N/A	#N/A	0	#N/A	#N/A	0	0	#N/A	#N/A	0	0	#N/A	#N/A	0	0	#N/A	#N/A	0	0	#N/A	#N/A	0	0	#N/A	#N/A	0
hsa-miR-4769-5p				0	#N/A	#N/A	#N/A	#N/A	#N/A	0	#N/A	#N/A	0	0	#N/A	#N/A	0	0	#N/A	#N/A	0	0	#N/A	#N/A	0	0	#N/A	#N/A	0	0	#N/A	#N/A	0
hsa-miR-3151-5p				0	#N/A	#N/A	#N/A	#N/A	#N/A	0	#N/A	#N/A	0	0	#N/A	#N/A	0	0	#N/A	#N/A	0	0	#N/A	#N/A	0	0	#N/A	#N/A	0	0	#N/A	#N/A	0
hsa-miR-4447				0	#N/A	#N/A	#N/A	#N/A	#N/A	0	#N/A	#N/A	0	0	#N/A	#N/A	0	0	#N/A	#N/A	0	0	#N/A	#N/A	0	0	#N/A	#N/A	0	0	#N/A	#N/A	0
hsa-miR-4472				0	#N/A	#N/A	#N/A	#N/A	#N/A	0	#N/A	#N/A	0	0	#N/A	#N/A	0	0	#N/A	#N/A	0	0	#N/A	#N/A	0	0	#N/A	#N/A	0	0	#N/A	#N/A	0
hsa-miR-642b-5p				0	#N/A	#N/A	#N/A	#N/A	#N/A	0	#N/A	#N/A	0	0	#N/A	#N/A	0	0	#N/A	#N/A	0	0	#N/A	#N/A	0	0	#N/A	#N/A	0	0	#N/A	#N/A	0
hsa-miR-2116-5p				0	#N/A	#N/A	#N/A	#N/A	#N/A	0	#N/A	#N/A	0	0	#N/A	#N/A	0	0	#N/A	#N/A	0	0	#N/A	#N/A	0	0	#N/A	#N/A	0	0	#N/A	#N/A	0
hsa-miR-3147				0	#N/A	#N/A	#N/A	#N/A	#N/A	0	#N/A	#N/A	0	0	#N/A	#N/A	0	0	#N/A	#N/A	0	0	#N/A	#N/A	0	0	#N/A	#N/A	0	0	#N/A	#N/A	0
hsa-miR-6792-5p				0	#N/A	#N/A	#N/A	#N/A	#N/A	0	#N/A	#N/A	0	0	#N/A	#N/A	0	0	#N/A	#N/A	0	0	#N/A	#N/A	0	0	#N/A	#N/A	0	0	#N/A	#N/A	0
hsa-miR-6892-5p				0	#N/A	#N/A	#N/A	#N/A	#N/A	0	#N/A	#N/A	0	0	#N/A	#N/A	0	0	#N/A	#N/A	0	0	#N/A	#N/A	0	0	#N/A	#N/A	0	0	#N/A	#N/A	0
hsa-miR-4724-3p				0	#N/A	#N/A	#N/A	#N/A	#N/A	0	#N/A	#N/A	0	0	#N/A	#N/A	0	0	#N/A	#N/A	0	0	#N/A	#N/A	0	0	#N/A	#N/A	0	0	#N/A	#N/A	0
hsa-miR-877-5p				0	#N/A	#N/A	#N/A	#N/A	#N/A	0	#N/A	#N/A	0	0	#N/A	#N/A	0	0	#N/A	#N/A	0	0	#N/A	#N/A	0	0	#N/A	#N/A	0	0	#N/A	#N/A	0
hsa-miR-376a-5p				0	#N/A	#N/A	#N/A	#N/A	#N/A	0	#N/A	#N/A	0	0	#N/A	#N/A	0	0	#N/A	#N/A	0	0	#N/A	#N/A	0	0	#N/A	#N/A	0	0	#N/A	#N/A	0
hsa-miR-5682				0	#N/A	#N/A	#N/A	#N/A	#N/A	0	#N/A	#N/A	0	0	#N/A	#N/A	0	0	#N/A	#N/A	0	0	#N/A	#N/A	0	0	#N/A	#N/A	0	0	#N/A	#N/A	0
hsa-miR-6824-5p				0	#N/A	#N/A	#N/A	#N/A	#N/A	0	#N/A	#N/A	0	0	#N/A	#N/A	0	0	#N/A	#N/A	0	0	#N/A	#N/A	0	0	#N/A	#N/A	0	0	#N/A	#N/A	0
hsa-miR-6789-5p				0	#N/A	#N/A	#N/A	#N/A	#N/A	0	#N/A	#N/A	0	0	#N/A	#N/A	0	0	#N/A	#N/A	0	0	#N/A	#N/A	0	0	#N/A	#N/A	0	0	#N/A	#N/A	0
hsa-miR-6800-5p				0	#N/A	#N/A	#N/A	#N/A	#N/A	0	#N/A	#N/A	0	0	#N/A	#N/A	0	0	#N/A	#N/A	0	0	#N/A	#N/A	0	0	#N/A	#N/A	0	0	#N/A	#N/A	0
hsa-miR-4789-5p				0	#N/A	#N/A	#N/A	#N/A	#N/A	0	#N/A	#N/A	0	0	#N/A	#N/A	0	0	#N/A	#N/A	0	0	#N/A	#N/A	0	0	#N/A	#N/A	0	0	#N/A	#N/A	0
hsa-miR-4420				0	#N/A	#N/A	#N/A	#N/A	#N/A	0	#N/A	#N/A	0	0	#N/A	#N/A	0	0	#N/A	#N/A	0	0	#N/A	#N/A	0	0	#N/A	#N/A	0	0	#N/A	#N/A	0
hsa-miR-485-3p				0.333333	-5.81155	-2.53892	0.373246	#N/A	1	1	#N/A	#N/A	27.9497	0	#N/A	#N/A	0	0	#N/A	#N/A	0	0	#N/A	#N/A	0	0	#N/A	#N/A	0	0	#N/A	#N/A	0
hsa-miR-4436b-5p				0	#N/A	#N/A	#N/A	#N/A	#N/A	0	#N/A	#N/A	0	0	#N/A	#N/A	0	0	#N/A	#N/A	0	0	#N/A	#N/A	0	0	#N/A	#N/A	0	0	#N/A	#N/A	0
hsa-miR-145-5p				2	3.94427	1.97976	0.33469	0.736817	1	0	#N/A	#N/A	0	0	#N/A	#N/A	0	3	#N/A	#N/A	106.995	1	#N/A	#N/A	41.7796	0	#N/A	#N/A	0	5	#N/A	#N/A	676.31
hsa-miR-642a-5p				0	#N/A	#N/A	#N/A	#N/A	#N/A	0	#N/A	#N/A	0	0	#N/A	#N/A	0	0	#N/A	#N/A	0	0	#N/A	#N/A	0	0	#N/A	#N/A	0	0	#N/A	#N/A	0
hsa-miR-670-5p				0	#N/A	#N/A	#N/A	#N/A	#N/A	0	#N/A	#N/A	0	0	#N/A	#N/A	0	0	#N/A	#N/A	0	0	#N/A	#N/A	0	0	#N/A	#N/A	0	0	#N/A	#N/A	0
hsa-miR-572				0	#N/A	#N/A	#N/A	#N/A	#N/A	0	#N/A	#N/A	0	0	#N/A	#N/A	0	0	#N/A	#N/A	0	0	#N/A	#N/A	0	0	#N/A	#N/A	0	0	#N/A	#N/A	0
hsa-miR-5571-3p				0	#N/A	#N/A	#N/A	#N/A	#N/A	0	#N/A	#N/A	0	0	#N/A	#N/A	0	0	#N/A	#N/A	0	0	#N/A	#N/A	0	0	#N/A	#N/A	0	0	#N/A	#N/A	0
hsa-miR-4691-5p				0	#N/A	#N/A	#N/A	#N/A	#N/A	0	#N/A	#N/A	0	0	#N/A	#N/A	0	0	#N/A	#N/A	0	0	#N/A	#N/A	0	0	#N/A	#N/A	0	0	#N/A	#N/A	0
hsa-miR-11181-5p				0	#N/A	#N/A	#N/A	#N/A	#N/A	0	#N/A	#N/A	0	0	#N/A	#N/A	0	0	#N/A	#N/A	0	0	#N/A	#N/A	0	0	#N/A	#N/A	0	0	#N/A	#N/A	0
hsa-miR-203a-3p				0	#N/A	#N/A	#N/A	#N/A	#N/A	0	#N/A	#N/A	0	0	#N/A	#N/A	0	0	#N/A	#N/A	0	0	#N/A	#N/A	0	0	#N/A	#N/A	0	0	#N/A	#N/A	0
hsa-miR-887-3p				0	#N/A	#N/A	#N/A	#N/A	#N/A	0	#N/A	#N/A	0	0	#N/A	#N/A	0	0	#N/A	#N/A	0	0	#N/A	#N/A	0	0	#N/A	#N/A	0	0	#N/A	#N/A	0
hsa-miR-6126				0	#N/A	#N/A	#N/A	#N/A	#N/A	0	#N/A	#N/A	0	0	#N/A	#N/A	0	0	#N/A	#N/A	0	0	#N/A	#N/A	0	0	#N/A	#N/A	0	0	#N/A	#N/A	0
hsa-miR-183-3p				0	#N/A	#N/A	#N/A	#N/A	#N/A	0	#N/A	#N/A	0	0	#N/A	#N/A	0	0	#N/A	#N/A	0	0	#N/A	#N/A	0	0	#N/A	#N/A	0	0	#N/A	#N/A	0
hsa-miR-489-3p				0	#N/A	#N/A	#N/A	#N/A	#N/A	0	#N/A	#N/A	0	0	#N/A	#N/A	0	0	#N/A	#N/A	0	0	#N/A	#N/A	0	0	#N/A	#N/A	0	0	#N/A	#N/A	0
hsa-miR-4439				0	#N/A	#N/A	#N/A	#N/A	#N/A	0	#N/A	#N/A	0	0	#N/A	#N/A	0	0	#N/A	#N/A	0	0	#N/A	#N/A	0	0	#N/A	#N/A	0	0	#N/A	#N/A	0
hsa-miR-6864-3p				0	#N/A	#N/A	#N/A	#N/A	#N/A	0	#N/A	#N/A	0	0	#N/A	#N/A	0	0	#N/A	#N/A	0	0	#N/A	#N/A	0	0	#N/A	#N/A	0	0	#N/A	#N/A	0
hsa-miR-6807-5p				0	#N/A	#N/A	#N/A	#N/A	#N/A	0	#N/A	#N/A	0	0	#N/A	#N/A	0	0	#N/A	#N/A	0	0	#N/A	#N/A	0	0	#N/A	#N/A	0	0	#N/A	#N/A	0
hsa-miR-1224-5p				0	#N/A	#N/A	#N/A	#N/A	#N/A	0	#N/A	#N/A	0	0	#N/A	#N/A	0	0	#N/A	#N/A	0	0	#N/A	#N/A	0	0	#N/A	#N/A	0	0	#N/A	#N/A	0
hsa-miR-6858-5p				0	#N/A	#N/A	#N/A	#N/A	#N/A	0	#N/A	#N/A	0	0	#N/A	#N/A	0	0	#N/A	#N/A	0	0	#N/A	#N/A	0	0	#N/A	#N/A	0	0	#N/A	#N/A	0
hsa-miR-6765-5p				0	#N/A	#N/A	#N/A	#N/A	#N/A	0	#N/A	#N/A	0	0	#N/A	#N/A	0	0	#N/A	#N/A	0	0	#N/A	#N/A	0	0	#N/A	#N/A	0	0	#N/A	#N/A	0
hsa-miR-6834-5p				0	#N/A	#N/A	#N/A	#N/A	#N/A	0	#N/A	#N/A	0	0	#N/A	#N/A	0	0	#N/A	#N/A	0	0	#N/A	#N/A	0	0	#N/A	#N/A	0	0	#N/A	#N/A	0
hsa-miR-1226-5p				0	#N/A	#N/A	#N/A	#N/A	#N/A	0	#N/A	#N/A	0	0	#N/A	#N/A	0	0	#N/A	#N/A	0	0	#N/A	#N/A	0	0	#N/A	#N/A	0	0	#N/A	#N/A	0
hsa-miR-6869-5p				0	#N/A	#N/A	#N/A	#N/A	#N/A	0	#N/A	#N/A	0	0	#N/A	#N/A	0	0	#N/A	#N/A	0	0	#N/A	#N/A	0	0	#N/A	#N/A	0	0	#N/A	#N/A	0
hsa-miR-937-5p				0	#N/A	#N/A	#N/A	#N/A	#N/A	0	#N/A	#N/A	0	0	#N/A	#N/A	0	0	#N/A	#N/A	0	0	#N/A	#N/A	0	0	#N/A	#N/A	0	0	#N/A	#N/A	0
hsa-miR-627-5p				0	#N/A	#N/A	#N/A	#N/A	#N/A	0	#N/A	#N/A	0	0	#N/A	#N/A	0	0	#N/A	#N/A	0	0	#N/A	#N/A	0	0	#N/A	#N/A	0	0	#N/A	#N/A	0
hsa-miR-1238-5p				0	#N/A	#N/A	#N/A	#N/A	#N/A	0	#N/A	#N/A	0	0	#N/A	#N/A	0	0	#N/A	#N/A	0	0	#N/A	#N/A	0	0	#N/A	#N/A	0	0	#N/A	#N/A	0
hsa-miR-4758-5p				0	#N/A	#N/A	#N/A	#N/A	#N/A	0	#N/A	#N/A	0	0	#N/A	#N/A	0	0	#N/A	#N/A	0	0	#N/A	#N/A	0	0	#N/A	#N/A	0	0	#N/A	#N/A	0
hsa-miR-4658				0	#N/A	#N/A	#N/A	#N/A	#N/A	0	#N/A	#N/A	0	0	#N/A	#N/A	0	0	#N/A	#N/A	0	0	#N/A	#N/A	0	0	#N/A	#N/A	0	0	#N/A	#N/A	0
hsa-miR-6790-5p				0	#N/A	#N/A	#N/A	#N/A	#N/A	0	#N/A	#N/A	0	0	#N/A	#N/A	0	0	#N/A	#N/A	0	0	#N/A	#N/A	0	0	#N/A	#N/A	0	0	#N/A	#N/A	0
hsa-miR-10395-5p				0	#N/A	#N/A	#N/A	#N/A	#N/A	0	#N/A	#N/A	0	0	#N/A	#N/A	0	0	#N/A	#N/A	0	0	#N/A	#N/A	0	0	#N/A	#N/A	0	0	#N/A	#N/A	0
hsa-miR-548aw				0	#N/A	#N/A	#N/A	#N/A	#N/A	0	#N/A	#N/A	0	0	#N/A	#N/A	0	0	#N/A	#N/A	0	0	#N/A	#N/A	0	0	#N/A	#N/A	0	0	#N/A	#N/A	0
hsa-miR-5011-3p				0	#N/A	#N/A	#N/A	#N/A	#N/A	0	#N/A	#N/A	0	0	#N/A	#N/A	0	0	#N/A	#N/A	0	0	#N/A	#N/A	0	0	#N/A	#N/A	0	0	#N/A	#N/A	0
hsa-miR-33b-5p				0	#N/A	#N/A	#N/A	#N/A	#N/A	0	#N/A	#N/A	0	0	#N/A	#N/A	0	0	#N/A	#N/A	0	0	#N/A	#N/A	0	0	#N/A	#N/A	0	0	#N/A	#N/A	0
hsa-miR-33a-5p				0	#N/A	#N/A	#N/A	#N/A	#N/A	0	#N/A	#N/A	0	0	#N/A	#N/A	0	0	#N/A	#N/A	0	0	#N/A	#N/A	0	0	#N/A	#N/A	0	0	#N/A	#N/A	0
hsa-miR-4715-3p				0	#N/A	#N/A	#N/A	#N/A	#N/A	0	#N/A	#N/A	0	0	#N/A	#N/A	0	0	#N/A	#N/A	0	0	#N/A	#N/A	0	0	#N/A	#N/A	0	0	#N/A	#N/A	0
hsa-miR-1202				0	#N/A	#N/A	#N/A	#N/A	#N/A	0	#N/A	#N/A	0	0	#N/A	#N/A	0	0	#N/A	#N/A	0	0	#N/A	#N/A	0	0	#N/A	#N/A	0	0	#N/A	#N/A	0
hsa-miR-6850-5p				0	#N/A	#N/A	#N/A	#N/A	#N/A	0	#N/A	#N/A	0	0	#N/A	#N/A	0	0	#N/A	#N/A	0	0	#N/A	#N/A	0	0	#N/A	#N/A	0	0	#N/A	#N/A	0
hsa-miR-6821-5p				0	#N/A	#N/A	#N/A	#N/A	#N/A	0	#N/A	#N/A	0	0	#N/A	#N/A	0	0	#N/A	#N/A	0	0	#N/A	#N/A	0	0	#N/A	#N/A	0	0	#N/A	#N/A	0
hsa-miR-3977				0	#N/A	#N/A	#N/A	#N/A	#N/A	0	#N/A	#N/A	0	0	#N/A	#N/A	0	0	#N/A	#N/A	0	0	#N/A	#N/A	0	0	#N/A	#N/A	0	0	#N/A	#N/A	0
hsa-miR-3978				0	#N/A	#N/A	#N/A	#N/A	#N/A	0	#N/A	#N/A	0	0	#N/A	#N/A	0	0	#N/A	#N/A	0	0	#N/A	#N/A	0	0	#N/A	#N/A	0	0	#N/A	#N/A	0
hsa-miR-4776-5p				0	#N/A	#N/A	#N/A	#N/A	#N/A	0	#N/A	#N/A	0	0	#N/A	#N/A	0	0	#N/A	#N/A	0	0	#N/A	#N/A	0	0	#N/A	#N/A	0	0	#N/A	#N/A	0
hsa-miR-4535				0	#N/A	#N/A	#N/A	#N/A	#N/A	0	#N/A	#N/A	0	0	#N/A	#N/A	0	0	#N/A	#N/A	0	0	#N/A	#N/A	0	0	#N/A	#N/A	0	0	#N/A	#N/A	0
hsa-miR-3198				0	#N/A	#N/A	#N/A	#N/A	#N/A	0	#N/A	#N/A	0	0	#N/A	#N/A	0	0	#N/A	#N/A	0	0	#N/A	#N/A	0	0	#N/A	#N/A	0	0	#N/A	#N/A	0
hsa-miR-8057				0	#N/A	#N/A	#N/A	#N/A	#N/A	0	#N/A	#N/A	0	0	#N/A	#N/A	0	0	#N/A	#N/A	0	0	#N/A	#N/A	0	0	#N/A	#N/A	0	0	#N/A	#N/A	0
hsa-miR-647				0	#N/A	#N/A	#N/A	#N/A	#N/A	0	#N/A	#N/A	0	0	#N/A	#N/A	0	0	#N/A	#N/A	0	0	#N/A	#N/A	0	0	#N/A	#N/A	0	0	#N/A	#N/A	0
hsa-miR-5089-5p				0	#N/A	#N/A	#N/A	#N/A	#N/A	0	#N/A	#N/A	0	0	#N/A	#N/A	0	0	#N/A	#N/A	0	0	#N/A	#N/A	0	0	#N/A	#N/A	0	0	#N/A	#N/A	0
hsa-miR-1228-5p				0	#N/A	#N/A	#N/A	#N/A	#N/A	0	#N/A	#N/A	0	0	#N/A	#N/A	0	0	#N/A	#N/A	0	0	#N/A	#N/A	0	0	#N/A	#N/A	0	0	#N/A	#N/A	0
hsa-miR-3620-5p				0	#N/A	#N/A	#N/A	#N/A	#N/A	0	#N/A	#N/A	0	0	#N/A	#N/A	0	0	#N/A	#N/A	0	0	#N/A	#N/A	0	0	#N/A	#N/A	0	0	#N/A	#N/A	0
hsa-miR-1227-5p				0	#N/A	#N/A	#N/A	#N/A	#N/A	0	#N/A	#N/A	0	0	#N/A	#N/A	0	0	#N/A	#N/A	0	0	#N/A	#N/A	0	0	#N/A	#N/A	0	0	#N/A	#N/A	0
hsa-miR-1275				0	#N/A	#N/A	#N/A	#N/A	#N/A	0	#N/A	#N/A	0	0	#N/A	#N/A	0	0	#N/A	#N/A	0	0	#N/A	#N/A	0	0	#N/A	#N/A	0	0	#N/A	#N/A	0
hsa-miR-1225-5p				0	#N/A	#N/A	#N/A	#N/A	#N/A	0	#N/A	#N/A	0	0	#N/A	#N/A	0	0	#N/A	#N/A	0	0	#N/A	#N/A	0	0	#N/A	#N/A	0	0	#N/A	#N/A	0
hsa-miR-1229-5p				0	#N/A	#N/A	#N/A	#N/A	#N/A	0	#N/A	#N/A	0	0	#N/A	#N/A	0	0	#N/A	#N/A	0	0	#N/A	#N/A	0	0	#N/A	#N/A	0	0	#N/A	#N/A	0
hsa-miR-6741-5p				0	#N/A	#N/A	#N/A	#N/A	#N/A	0	#N/A	#N/A	0	0	#N/A	#N/A	0	0	#N/A	#N/A	0	0	#N/A	#N/A	0	0	#N/A	#N/A	0	0	#N/A	#N/A	0
hsa-miR-3940-5p				0	#N/A	#N/A	#N/A	#N/A	#N/A	0	#N/A	#N/A	0	0	#N/A	#N/A	0	0	#N/A	#N/A	0	0	#N/A	#N/A	0	0	#N/A	#N/A	0	0	#N/A	#N/A	0
hsa-miR-6848-3p				0	#N/A	#N/A	#N/A	#N/A	#N/A	0	#N/A	#N/A	0	0	#N/A	#N/A	0	0	#N/A	#N/A	0	0	#N/A	#N/A	0	0	#N/A	#N/A	0	0	#N/A	#N/A	0
hsa-miR-487a-5p				26.6667	-210.651	-7.71871	0.041626	0.343683	1	80	#N/A	#N/A	2235.98	0	#N/A	#N/A	0	0	#N/A	#N/A	0	0	#N/A	#N/A	0	0	#N/A	#N/A	0	0	#N/A	#N/A	0
hsa-miR-487b-5p				0.666667	-9.85151	-3.30035	0.229555	0.651646	1	2	#N/A	#N/A	55.8994	0	#N/A	#N/A	0	0	#N/A	#N/A	0	0	#N/A	#N/A	0	0	#N/A	#N/A	0	0	#N/A	#N/A	0
hsa-miR-632				0	#N/A	#N/A	#N/A	#N/A	#N/A	0	#N/A	#N/A	0	0	#N/A	#N/A	0	0	#N/A	#N/A	0	0	#N/A	#N/A	0	0	#N/A	#N/A	0	0	#N/A	#N/A	0
hsa-miR-1231				0	#N/A	#N/A	#N/A	#N/A	#N/A	0	#N/A	#N/A	0	0	#N/A	#N/A	0	0	#N/A	#N/A	0	0	#N/A	#N/A	0	0	#N/A	#N/A	0	0	#N/A	#N/A	0
hsa-miR-511-5p				0	#N/A	#N/A	#N/A	#N/A	#N/A	0	#N/A	#N/A	0	0	#N/A	#N/A	0	0	#N/A	#N/A	0	0	#N/A	#N/A	0	0	#N/A	#N/A	0	0	#N/A	#N/A	0
hsa-miR-6808-3p				0	#N/A	#N/A	#N/A	#N/A	#N/A	0	#N/A	#N/A	0	0	#N/A	#N/A	0	0	#N/A	#N/A	0	0	#N/A	#N/A	0	0	#N/A	#N/A	0	0	#N/A	#N/A	0
hsa-miR-147b-3p				0	#N/A	#N/A	#N/A	#N/A	#N/A	0	#N/A	#N/A	0	0	#N/A	#N/A	0	0	#N/A	#N/A	0	0	#N/A	#N/A	0	0	#N/A	#N/A	0	0	#N/A	#N/A	0
hsa-miR-6833-5p				0	#N/A	#N/A	#N/A	#N/A	#N/A	0	#N/A	#N/A	0	0	#N/A	#N/A	0	0	#N/A	#N/A	0	0	#N/A	#N/A	0	0	#N/A	#N/A	0	0	#N/A	#N/A	0
hsa-miR-7108-5p				0	#N/A	#N/A	#N/A	#N/A	#N/A	0	#N/A	#N/A	0	0	#N/A	#N/A	0	0	#N/A	#N/A	0	0	#N/A	#N/A	0	0	#N/A	#N/A	0	0	#N/A	#N/A	0
hsa-miR-147a				0	#N/A	#N/A	#N/A	#N/A	#N/A	0	#N/A	#N/A	0	0	#N/A	#N/A	0	0	#N/A	#N/A	0	0	#N/A	#N/A	0	0	#N/A	#N/A	0	0	#N/A	#N/A	0
hsa-miR-2053				0	#N/A	#N/A	#N/A	#N/A	#N/A	0	#N/A	#N/A	0	0	#N/A	#N/A	0	0	#N/A	#N/A	0	0	#N/A	#N/A	0	0	#N/A	#N/A	0	0	#N/A	#N/A	0
hsa-miR-4273				0	#N/A	#N/A	#N/A	#N/A	#N/A	0	#N/A	#N/A	0	0	#N/A	#N/A	0	0	#N/A	#N/A	0	0	#N/A	#N/A	0	0	#N/A	#N/A	0	0	#N/A	#N/A	0
hsa-miR-653-5p				0	#N/A	#N/A	#N/A	#N/A	#N/A	0	#N/A	#N/A	0	0	#N/A	#N/A	0	0	#N/A	#N/A	0	0	#N/A	#N/A	0	0	#N/A	#N/A	0	0	#N/A	#N/A	0
hsa-miR-2909				0	#N/A	#N/A	#N/A	#N/A	#N/A	0	#N/A	#N/A	0	0	#N/A	#N/A	0	0	#N/A	#N/A	0	0	#N/A	#N/A	0	0	#N/A	#N/A	0	0	#N/A	#N/A	0
hsa-miR-607				0	#N/A	#N/A	#N/A	#N/A	#N/A	0	#N/A	#N/A	0	0	#N/A	#N/A	0	0	#N/A	#N/A	0	0	#N/A	#N/A	0	0	#N/A	#N/A	0	0	#N/A	#N/A	0
hsa-miR-3692-3p				0	#N/A	#N/A	#N/A	#N/A	#N/A	0	#N/A	#N/A	0	0	#N/A	#N/A	0	0	#N/A	#N/A	0	0	#N/A	#N/A	0	0	#N/A	#N/A	0	0	#N/A	#N/A	0
hsa-miR-3074-5p				0	#N/A	#N/A	#N/A	#N/A	#N/A	0	#N/A	#N/A	0	0	#N/A	#N/A	0	0	#N/A	#N/A	0	0	#N/A	#N/A	0	0	#N/A	#N/A	0	0	#N/A	#N/A	0
hsa-miR-629-3p				0	#N/A	#N/A	#N/A	#N/A	#N/A	0	#N/A	#N/A	0	0	#N/A	#N/A	0	0	#N/A	#N/A	0	0	#N/A	#N/A	0	0	#N/A	#N/A	0	0	#N/A	#N/A	0
hsa-miR-4652-3p				0	#N/A	#N/A	#N/A	#N/A	#N/A	0	#N/A	#N/A	0	0	#N/A	#N/A	0	0	#N/A	#N/A	0	0	#N/A	#N/A	0	0	#N/A	#N/A	0	0	#N/A	#N/A	0
hsa-miR-3122				0	#N/A	#N/A	#N/A	#N/A	#N/A	0	#N/A	#N/A	0	0	#N/A	#N/A	0	0	#N/A	#N/A	0	0	#N/A	#N/A	0	0	#N/A	#N/A	0	0	#N/A	#N/A	0
hsa-miR-5572				0	#N/A	#N/A	#N/A	#N/A	#N/A	0	#N/A	#N/A	0	0	#N/A	#N/A	0	0	#N/A	#N/A	0	0	#N/A	#N/A	0	0	#N/A	#N/A	0	0	#N/A	#N/A	0
hsa-miR-599				0	#N/A	#N/A	#N/A	#N/A	#N/A	0	#N/A	#N/A	0	0	#N/A	#N/A	0	0	#N/A	#N/A	0	0	#N/A	#N/A	0	0	#N/A	#N/A	0	0	#N/A	#N/A	0
hsa-miR-552-5p				0	#N/A	#N/A	#N/A	#N/A	#N/A	0	#N/A	#N/A	0	0	#N/A	#N/A	0	0	#N/A	#N/A	0	0	#N/A	#N/A	0	0	#N/A	#N/A	0	0	#N/A	#N/A	0
hsa-miR-557				0	#N/A	#N/A	#N/A	#N/A	#N/A	0	#N/A	#N/A	0	0	#N/A	#N/A	0	0	#N/A	#N/A	0	0	#N/A	#N/A	0	0	#N/A	#N/A	0	0	#N/A	#N/A	0
hsa-miR-7850-5p				0	#N/A	#N/A	#N/A	#N/A	#N/A	0	#N/A	#N/A	0	0	#N/A	#N/A	0	0	#N/A	#N/A	0	0	#N/A	#N/A	0	0	#N/A	#N/A	0	0	#N/A	#N/A	0
hsa-miR-2681-5p				0	#N/A	#N/A	#N/A	#N/A	#N/A	0	#N/A	#N/A	0	0	#N/A	#N/A	0	0	#N/A	#N/A	0	0	#N/A	#N/A	0	0	#N/A	#N/A	0	0	#N/A	#N/A	0
hsa-miR-548x-3p				0	#N/A	#N/A	#N/A	#N/A	#N/A	0	#N/A	#N/A	0	0	#N/A	#N/A	0	0	#N/A	#N/A	0	0	#N/A	#N/A	0	0	#N/A	#N/A	0	0	#N/A	#N/A	0
hsa-miR-548aj-3p				0	#N/A	#N/A	#N/A	#N/A	#N/A	0	#N/A	#N/A	0	0	#N/A	#N/A	0	0	#N/A	#N/A	0	0	#N/A	#N/A	0	0	#N/A	#N/A	0	0	#N/A	#N/A	0
hsa-miR-548as-3p				0	#N/A	#N/A	#N/A	#N/A	#N/A	0	#N/A	#N/A	0	0	#N/A	#N/A	0	0	#N/A	#N/A	0	0	#N/A	#N/A	0	0	#N/A	#N/A	0	0	#N/A	#N/A	0
hsa-miR-548ar-3p				0	#N/A	#N/A	#N/A	#N/A	#N/A	0	#N/A	#N/A	0	0	#N/A	#N/A	0	0	#N/A	#N/A	0	0	#N/A	#N/A	0	0	#N/A	#N/A	0	0	#N/A	#N/A	0
hsa-miR-5582-3p				0	#N/A	#N/A	#N/A	#N/A	#N/A	0	#N/A	#N/A	0	0	#N/A	#N/A	0	0	#N/A	#N/A	0	0	#N/A	#N/A	0	0	#N/A	#N/A	0	0	#N/A	#N/A	0
hsa-miR-4282				0	#N/A	#N/A	#N/A	#N/A	#N/A	0	#N/A	#N/A	0	0	#N/A	#N/A	0	0	#N/A	#N/A	0	0	#N/A	#N/A	0	0	#N/A	#N/A	0	0	#N/A	#N/A	0
hsa-miR-3133				0	#N/A	#N/A	#N/A	#N/A	#N/A	0	#N/A	#N/A	0	0	#N/A	#N/A	0	0	#N/A	#N/A	0	0	#N/A	#N/A	0	0	#N/A	#N/A	0	0	#N/A	#N/A	0
hsa-miR-7161-5p				0	#N/A	#N/A	#N/A	#N/A	#N/A	0	#N/A	#N/A	0	0	#N/A	#N/A	0	0	#N/A	#N/A	0	0	#N/A	#N/A	0	0	#N/A	#N/A	0	0	#N/A	#N/A	0
hsa-miR-1276				0	#N/A	#N/A	#N/A	#N/A	#N/A	0	#N/A	#N/A	0	0	#N/A	#N/A	0	0	#N/A	#N/A	0	0	#N/A	#N/A	0	0	#N/A	#N/A	0	0	#N/A	#N/A	0
hsa-miR-12135				0	#N/A	#N/A	#N/A	#N/A	#N/A	0	#N/A	#N/A	0	0	#N/A	#N/A	0	0	#N/A	#N/A	0	0	#N/A	#N/A	0	0	#N/A	#N/A	0	0	#N/A	#N/A	0
hsa-miR-559				0	#N/A	#N/A	#N/A	#N/A	#N/A	0	#N/A	#N/A	0	0	#N/A	#N/A	0	0	#N/A	#N/A	0	0	#N/A	#N/A	0	0	#N/A	#N/A	0	0	#N/A	#N/A	0
hsa-miR-106b-5p				0	#N/A	#N/A	#N/A	#N/A	#N/A	0	#N/A	#N/A	0	0	#N/A	#N/A	0	0	#N/A	#N/A	0	0	#N/A	#N/A	0	0	#N/A	#N/A	0	0	#N/A	#N/A	0
hsa-miR-20a-5p				0	#N/A	#N/A	#N/A	#N/A	#N/A	0	#N/A	#N/A	0	0	#N/A	#N/A	0	0	#N/A	#N/A	0	0	#N/A	#N/A	0	0	#N/A	#N/A	0	0	#N/A	#N/A	0
hsa-miR-4796-3p				0	#N/A	#N/A	#N/A	#N/A	#N/A	0	#N/A	#N/A	0	0	#N/A	#N/A	0	0	#N/A	#N/A	0	0	#N/A	#N/A	0	0	#N/A	#N/A	0	0	#N/A	#N/A	0
hsa-miR-3121-3p				0	#N/A	#N/A	#N/A	#N/A	#N/A	0	#N/A	#N/A	0	0	#N/A	#N/A	0	0	#N/A	#N/A	0	0	#N/A	#N/A	0	0	#N/A	#N/A	0	0	#N/A	#N/A	0
hsa-miR-605-5p				0	#N/A	#N/A	#N/A	#N/A	#N/A	0	#N/A	#N/A	0	0	#N/A	#N/A	0	0	#N/A	#N/A	0	0	#N/A	#N/A	0	0	#N/A	#N/A	0	0	#N/A	#N/A	0
hsa-miR-513c-3p				0	#N/A	#N/A	#N/A	#N/A	#N/A	0	#N/A	#N/A	0	0	#N/A	#N/A	0	0	#N/A	#N/A	0	0	#N/A	#N/A	0	0	#N/A	#N/A	0	0	#N/A	#N/A	0
hsa-miR-513a-3p				0	#N/A	#N/A	#N/A	#N/A	#N/A	0	#N/A	#N/A	0	0	#N/A	#N/A	0	0	#N/A	#N/A	0	0	#N/A	#N/A	0	0	#N/A	#N/A	0	0	#N/A	#N/A	0
hsa-miR-5688				0	#N/A	#N/A	#N/A	#N/A	#N/A	0	#N/A	#N/A	0	0	#N/A	#N/A	0	0	#N/A	#N/A	0	0	#N/A	#N/A	0	0	#N/A	#N/A	0	0	#N/A	#N/A	0
hsa-miR-141-3p				0	#N/A	#N/A	#N/A	#N/A	#N/A	0	#N/A	#N/A	0	0	#N/A	#N/A	0	0	#N/A	#N/A	0	0	#N/A	#N/A	0	0	#N/A	#N/A	0	0	#N/A	#N/A	0
hsa-miR-200a-3p				0	#N/A	#N/A	#N/A	#N/A	#N/A	0	#N/A	#N/A	0	0	#N/A	#N/A	0	0	#N/A	#N/A	0	0	#N/A	#N/A	0	0	#N/A	#N/A	0	0	#N/A	#N/A	0
hsa-miR-132-3p				0	#N/A	#N/A	#N/A	#N/A	#N/A	0	#N/A	#N/A	0	0	#N/A	#N/A	0	0	#N/A	#N/A	0	0	#N/A	#N/A	0	0	#N/A	#N/A	0	0	#N/A	#N/A	0
hsa-miR-212-3p				0.333333	-5.81155	-2.53892	0.373246	#N/A	1	1	#N/A	#N/A	27.9497	0	#N/A	#N/A	0	0	#N/A	#N/A	0	0	#N/A	#N/A	0	0	#N/A	#N/A	0	0	#N/A	#N/A	0
hsa-miR-4803				0	#N/A	#N/A	#N/A	#N/A	#N/A	0	#N/A	#N/A	0	0	#N/A	#N/A	0	0	#N/A	#N/A	0	0	#N/A	#N/A	0	0	#N/A	#N/A	0	0	#N/A	#N/A	0
hsa-miR-6732-3p				0	#N/A	#N/A	#N/A	#N/A	#N/A	0	#N/A	#N/A	0	0	#N/A	#N/A	0	0	#N/A	#N/A	0	0	#N/A	#N/A	0	0	#N/A	#N/A	0	0	#N/A	#N/A	0
hsa-miR-3912-3p				0	#N/A	#N/A	#N/A	#N/A	#N/A	0	#N/A	#N/A	0	0	#N/A	#N/A	0	0	#N/A	#N/A	0	0	#N/A	#N/A	0	0	#N/A	#N/A	0	0	#N/A	#N/A	0
hsa-miR-4485-3p				0	#N/A	#N/A	#N/A	#N/A	#N/A	0	#N/A	#N/A	0	0	#N/A	#N/A	0	0	#N/A	#N/A	0	0	#N/A	#N/A	0	0	#N/A	#N/A	0	0	#N/A	#N/A	0
hsa-miR-582-3p				0	#N/A	#N/A	#N/A	#N/A	#N/A	0	#N/A	#N/A	0	0	#N/A	#N/A	0	0	#N/A	#N/A	0	0	#N/A	#N/A	0	0	#N/A	#N/A	0	0	#N/A	#N/A	0
hsa-miR-12120				0	#N/A	#N/A	#N/A	#N/A	#N/A	0	#N/A	#N/A	0	0	#N/A	#N/A	0	0	#N/A	#N/A	0	0	#N/A	#N/A	0	0	#N/A	#N/A	0	0	#N/A	#N/A	0
hsa-miR-6891-5p				0	#N/A	#N/A	#N/A	#N/A	#N/A	0	#N/A	#N/A	0	0	#N/A	#N/A	0	0	#N/A	#N/A	0	0	#N/A	#N/A	0	0	#N/A	#N/A	0	0	#N/A	#N/A	0
hsa-miR-506-3p				0	#N/A	#N/A	#N/A	#N/A	#N/A	0	#N/A	#N/A	0	0	#N/A	#N/A	0	0	#N/A	#N/A	0	0	#N/A	#N/A	0	0	#N/A	#N/A	0	0	#N/A	#N/A	0
hsa-miR-124-3p				0	#N/A	#N/A	#N/A	#N/A	#N/A	0	#N/A	#N/A	0	0	#N/A	#N/A	0	0	#N/A	#N/A	0	0	#N/A	#N/A	0	0	#N/A	#N/A	0	0	#N/A	#N/A	0
hsa-miR-3936				0	#N/A	#N/A	#N/A	#N/A	#N/A	0	#N/A	#N/A	0	0	#N/A	#N/A	0	0	#N/A	#N/A	0	0	#N/A	#N/A	0	0	#N/A	#N/A	0	0	#N/A	#N/A	0
hsa-miR-18a-5p				0	#N/A	#N/A	#N/A	#N/A	#N/A	0	#N/A	#N/A	0	0	#N/A	#N/A	0	0	#N/A	#N/A	0	0	#N/A	#N/A	0	0	#N/A	#N/A	0	0	#N/A	#N/A	0
hsa-miR-18b-5p				0	#N/A	#N/A	#N/A	#N/A	#N/A	0	#N/A	#N/A	0	0	#N/A	#N/A	0	0	#N/A	#N/A	0	0	#N/A	#N/A	0	0	#N/A	#N/A	0	0	#N/A	#N/A	0
hsa-miR-302e				0	#N/A	#N/A	#N/A	#N/A	#N/A	0	#N/A	#N/A	0	0	#N/A	#N/A	0	0	#N/A	#N/A	0	0	#N/A	#N/A	0	0	#N/A	#N/A	0	0	#N/A	#N/A	0
hsa-miR-302c-3p				0	#N/A	#N/A	#N/A	#N/A	#N/A	0	#N/A	#N/A	0	0	#N/A	#N/A	0	0	#N/A	#N/A	0	0	#N/A	#N/A	0	0	#N/A	#N/A	0	0	#N/A	#N/A	0
hsa-miR-302d-3p				0	#N/A	#N/A	#N/A	#N/A	#N/A	0	#N/A	#N/A	0	0	#N/A	#N/A	0	0	#N/A	#N/A	0	0	#N/A	#N/A	0	0	#N/A	#N/A	0	0	#N/A	#N/A	0
hsa-miR-302b-3p				0	#N/A	#N/A	#N/A	#N/A	#N/A	0	#N/A	#N/A	0	0	#N/A	#N/A	0	0	#N/A	#N/A	0	0	#N/A	#N/A	0	0	#N/A	#N/A	0	0	#N/A	#N/A	0
hsa-miR-302a-3p				0	#N/A	#N/A	#N/A	#N/A	#N/A	0	#N/A	#N/A	0	0	#N/A	#N/A	0	0	#N/A	#N/A	0	0	#N/A	#N/A	0	0	#N/A	#N/A	0	0	#N/A	#N/A	0
hsa-miR-200c-3p				1	10.2939	3.36372	0.190028	0.636374	1	0	#N/A	#N/A	0	0	#N/A	#N/A	0	0	#N/A	#N/A	0	1	#N/A	#N/A	41.7796	0	#N/A	#N/A	0	2	#N/A	#N/A	270.524
hsa-miR-200b-3p				0.666667	-2.34066	-1.22692	0.509305	0.843271	1	2	#N/A	#N/A	55.8994	0	#N/A	#N/A	0	0	#N/A	#N/A	0	1	#N/A	#N/A	41.7796	0	#N/A	#N/A	0	0	#N/A	#N/A	0
hsa-miR-429				1	7.52643	2.91197	0.269296	0.657264	1	0	#N/A	#N/A	0	0	#N/A	#N/A	0	0	#N/A	#N/A	0	2	#N/A	#N/A	83.5592	0	#N/A	#N/A	0	1	#N/A	#N/A	135.262
hsa-miR-500a-5p				0	#N/A	#N/A	#N/A	#N/A	#N/A	0	#N/A	#N/A	0	0	#N/A	#N/A	0	0	#N/A	#N/A	0	0	#N/A	#N/A	0	0	#N/A	#N/A	0	0	#N/A	#N/A	0
hsa-miR-216a-5p				0	#N/A	#N/A	#N/A	#N/A	#N/A	0	#N/A	#N/A	0	0	#N/A	#N/A	0	0	#N/A	#N/A	0	0	#N/A	#N/A	0	0	#N/A	#N/A	0	0	#N/A	#N/A	0
hsa-miR-580-5p				0	#N/A	#N/A	#N/A	#N/A	#N/A	0	#N/A	#N/A	0	0	#N/A	#N/A	0	0	#N/A	#N/A	0	0	#N/A	#N/A	0	0	#N/A	#N/A	0	0	#N/A	#N/A	0
hsa-miR-5700				0	#N/A	#N/A	#N/A	#N/A	#N/A	0	#N/A	#N/A	0	0	#N/A	#N/A	0	0	#N/A	#N/A	0	0	#N/A	#N/A	0	0	#N/A	#N/A	0	0	#N/A	#N/A	0
hsa-miR-365a-3p				1	-3.3008	-1.72281	0.245222	0.651646	1	2	#N/A	#N/A	55.8994	0	#N/A	#N/A	0	1	#N/A	#N/A	35.6651	1	#N/A	#N/A	41.7796	0	#N/A	#N/A	0	0	#N/A	#N/A	0
hsa-miR-302f				0	#N/A	#N/A	#N/A	#N/A	#N/A	0	#N/A	#N/A	0	0	#N/A	#N/A	0	0	#N/A	#N/A	0	0	#N/A	#N/A	0	0	#N/A	#N/A	0	0	#N/A	#N/A	0
hsa-miR-590-3p				0	#N/A	#N/A	#N/A	#N/A	#N/A	0	#N/A	#N/A	0	0	#N/A	#N/A	0	0	#N/A	#N/A	0	0	#N/A	#N/A	0	0	#N/A	#N/A	0	0	#N/A	#N/A	0
hsa-miR-6882-5p				0	#N/A	#N/A	#N/A	#N/A	#N/A	0	#N/A	#N/A	0	0	#N/A	#N/A	0	0	#N/A	#N/A	0	0	#N/A	#N/A	0	0	#N/A	#N/A	0	0	#N/A	#N/A	0
hsa-miR-4801				0	#N/A	#N/A	#N/A	#N/A	#N/A	0	#N/A	#N/A	0	0	#N/A	#N/A	0	0	#N/A	#N/A	0	0	#N/A	#N/A	0	0	#N/A	#N/A	0	0	#N/A	#N/A	0
hsa-miR-5683				0	#N/A	#N/A	#N/A	#N/A	#N/A	0	#N/A	#N/A	0	0	#N/A	#N/A	0	0	#N/A	#N/A	0	0	#N/A	#N/A	0	0	#N/A	#N/A	0	0	#N/A	#N/A	0
hsa-miR-6856-3p				0	#N/A	#N/A	#N/A	#N/A	#N/A	0	#N/A	#N/A	0	0	#N/A	#N/A	0	0	#N/A	#N/A	0	0	#N/A	#N/A	0	0	#N/A	#N/A	0	0	#N/A	#N/A	0
hsa-miR-101-3p				0	#N/A	#N/A	#N/A	#N/A	#N/A	0	#N/A	#N/A	0	0	#N/A	#N/A	0	0	#N/A	#N/A	0	0	#N/A	#N/A	0	0	#N/A	#N/A	0	0	#N/A	#N/A	0
hsa-miR-144-3p				0	#N/A	#N/A	#N/A	#N/A	#N/A	0	#N/A	#N/A	0	0	#N/A	#N/A	0	0	#N/A	#N/A	0	0	#N/A	#N/A	0	0	#N/A	#N/A	0	0	#N/A	#N/A	0
hsa-miR-4802-3p				0	#N/A	#N/A	#N/A	#N/A	#N/A	0	#N/A	#N/A	0	0	#N/A	#N/A	0	0	#N/A	#N/A	0	0	#N/A	#N/A	0	0	#N/A	#N/A	0	0	#N/A	#N/A	0
hsa-miR-140-3p				0	#N/A	#N/A	#N/A	#N/A	#N/A	0	#N/A	#N/A	0	0	#N/A	#N/A	0	0	#N/A	#N/A	0	0	#N/A	#N/A	0	0	#N/A	#N/A	0	0	#N/A	#N/A	0
hsa-miR-6512-5p				0	#N/A	#N/A	#N/A	#N/A	#N/A	0	#N/A	#N/A	0	0	#N/A	#N/A	0	0	#N/A	#N/A	0	0	#N/A	#N/A	0	0	#N/A	#N/A	0	0	#N/A	#N/A	0
hsa-miR-1912-3p				0	#N/A	#N/A	#N/A	#N/A	#N/A	0	#N/A	#N/A	0	0	#N/A	#N/A	0	0	#N/A	#N/A	0	0	#N/A	#N/A	0	0	#N/A	#N/A	0	0	#N/A	#N/A	0
hsa-miR-3130-5p				0	#N/A	#N/A	#N/A	#N/A	#N/A	0	#N/A	#N/A	0	0	#N/A	#N/A	0	0	#N/A	#N/A	0	0	#N/A	#N/A	0	0	#N/A	#N/A	0	0	#N/A	#N/A	0
hsa-miR-660-5p				0	#N/A	#N/A	#N/A	#N/A	#N/A	0	#N/A	#N/A	0	0	#N/A	#N/A	0	0	#N/A	#N/A	0	0	#N/A	#N/A	0	0	#N/A	#N/A	0	0	#N/A	#N/A	0
hsa-miR-10b-5p				0.333333	-1.38079	-0.465494	0.817769	0.96669	1	1	#N/A	#N/A	27.9497	0	#N/A	#N/A	0	0	#N/A	#N/A	0	1	#N/A	#N/A	41.7796	0	#N/A	#N/A	0	0	#N/A	#N/A	0
hsa-miR-10a-5p				40	-10.5128	-3.39407	0.186688	0.636374	1	119	#N/A	#N/A	3326.01	0	#N/A	#N/A	0	1	#N/A	#N/A	35.6651	5	#N/A	#N/A	208.898	0	#N/A	#N/A	0	1	#N/A	#N/A	135.262
hsa-miR-7851-3p				0	#N/A	#N/A	#N/A	#N/A	#N/A	0	#N/A	#N/A	0	0	#N/A	#N/A	0	0	#N/A	#N/A	0	0	#N/A	#N/A	0	0	#N/A	#N/A	0	0	#N/A	#N/A	0
hsa-miR-3939				0	#N/A	#N/A	#N/A	#N/A	#N/A	0	#N/A	#N/A	0	0	#N/A	#N/A	0	0	#N/A	#N/A	0	0	#N/A	#N/A	0	0	#N/A	#N/A	0	0	#N/A	#N/A	0
hsa-miR-433-5p				0	#N/A	#N/A	#N/A	#N/A	#N/A	0	#N/A	#N/A	0	0	#N/A	#N/A	0	0	#N/A	#N/A	0	0	#N/A	#N/A	0	0	#N/A	#N/A	0	0	#N/A	#N/A	0
hsa-miR-1277-3p				0	#N/A	#N/A	#N/A	#N/A	#N/A	0	#N/A	#N/A	0	0	#N/A	#N/A	0	0	#N/A	#N/A	0	0	#N/A	#N/A	0	0	#N/A	#N/A	0	0	#N/A	#N/A	0
hsa-miR-598-3p				0	#N/A	#N/A	#N/A	#N/A	#N/A	0	#N/A	#N/A	0	0	#N/A	#N/A	0	0	#N/A	#N/A	0	0	#N/A	#N/A	0	0	#N/A	#N/A	0	0	#N/A	#N/A	0
hsa-miR-4637				0	#N/A	#N/A	#N/A	#N/A	#N/A	0	#N/A	#N/A	0	0	#N/A	#N/A	0	0	#N/A	#N/A	0	0	#N/A	#N/A	0	0	#N/A	#N/A	0	0	#N/A	#N/A	0
hsa-miR-888-5p				0	#N/A	#N/A	#N/A	#N/A	#N/A	0	#N/A	#N/A	0	0	#N/A	#N/A	0	0	#N/A	#N/A	0	0	#N/A	#N/A	0	0	#N/A	#N/A	0	0	#N/A	#N/A	0
hsa-miR-510-5p				0	#N/A	#N/A	#N/A	#N/A	#N/A	0	#N/A	#N/A	0	0	#N/A	#N/A	0	0	#N/A	#N/A	0	0	#N/A	#N/A	0	0	#N/A	#N/A	0	0	#N/A	#N/A	0
hsa-miR-508-5p				0	#N/A	#N/A	#N/A	#N/A	#N/A	0	#N/A	#N/A	0	0	#N/A	#N/A	0	0	#N/A	#N/A	0	0	#N/A	#N/A	0	0	#N/A	#N/A	0	0	#N/A	#N/A	0
hsa-miR-514a-5p				0	#N/A	#N/A	#N/A	#N/A	#N/A	0	#N/A	#N/A	0	0	#N/A	#N/A	0	0	#N/A	#N/A	0	0	#N/A	#N/A	0	0	#N/A	#N/A	0	0	#N/A	#N/A	0
hsa-miR-509-5p				0	#N/A	#N/A	#N/A	#N/A	#N/A	0	#N/A	#N/A	0	0	#N/A	#N/A	0	0	#N/A	#N/A	0	0	#N/A	#N/A	0	0	#N/A	#N/A	0	0	#N/A	#N/A	0
hsa-miR-509-3-5p				0	#N/A	#N/A	#N/A	#N/A	#N/A	0	#N/A	#N/A	0	0	#N/A	#N/A	0	0	#N/A	#N/A	0	0	#N/A	#N/A	0	0	#N/A	#N/A	0	0	#N/A	#N/A	0
hsa-miR-217-5p				0	#N/A	#N/A	#N/A	#N/A	#N/A	0	#N/A	#N/A	0	0	#N/A	#N/A	0	0	#N/A	#N/A	0	0	#N/A	#N/A	0	0	#N/A	#N/A	0	0	#N/A	#N/A	0
hsa-miR-9898				0	#N/A	#N/A	#N/A	#N/A	#N/A	0	#N/A	#N/A	0	0	#N/A	#N/A	0	0	#N/A	#N/A	0	0	#N/A	#N/A	0	0	#N/A	#N/A	0	0	#N/A	#N/A	0
hsa-miR-890				0	#N/A	#N/A	#N/A	#N/A	#N/A	0	#N/A	#N/A	0	0	#N/A	#N/A	0	0	#N/A	#N/A	0	0	#N/A	#N/A	0	0	#N/A	#N/A	0	0	#N/A	#N/A	0
hsa-miR-5003-3p				0	#N/A	#N/A	#N/A	#N/A	#N/A	0	#N/A	#N/A	0	0	#N/A	#N/A	0	0	#N/A	#N/A	0	0	#N/A	#N/A	0	0	#N/A	#N/A	0	0	#N/A	#N/A	0
hsa-miR-6502-3p				0	#N/A	#N/A	#N/A	#N/A	#N/A	0	#N/A	#N/A	0	0	#N/A	#N/A	0	0	#N/A	#N/A	0	0	#N/A	#N/A	0	0	#N/A	#N/A	0	0	#N/A	#N/A	0
hsa-miR-6863				0	#N/A	#N/A	#N/A	#N/A	#N/A	0	#N/A	#N/A	0	0	#N/A	#N/A	0	0	#N/A	#N/A	0	0	#N/A	#N/A	0	0	#N/A	#N/A	0	0	#N/A	#N/A	0
hsa-miR-6758-5p				0	#N/A	#N/A	#N/A	#N/A	#N/A	0	#N/A	#N/A	0	0	#N/A	#N/A	0	0	#N/A	#N/A	0	0	#N/A	#N/A	0	0	#N/A	#N/A	0	0	#N/A	#N/A	0
hsa-miR-3125				0	#N/A	#N/A	#N/A	#N/A	#N/A	0	#N/A	#N/A	0	0	#N/A	#N/A	0	0	#N/A	#N/A	0	0	#N/A	#N/A	0	0	#N/A	#N/A	0	0	#N/A	#N/A	0
hsa-miR-12127				0	#N/A	#N/A	#N/A	#N/A	#N/A	0	#N/A	#N/A	0	0	#N/A	#N/A	0	0	#N/A	#N/A	0	0	#N/A	#N/A	0	0	#N/A	#N/A	0	0	#N/A	#N/A	0
hsa-miR-5007-5p				0	#N/A	#N/A	#N/A	#N/A	#N/A	0	#N/A	#N/A	0	0	#N/A	#N/A	0	0	#N/A	#N/A	0	0	#N/A	#N/A	0	0	#N/A	#N/A	0	0	#N/A	#N/A	0
hsa-miR-577				0	#N/A	#N/A	#N/A	#N/A	#N/A	0	#N/A	#N/A	0	0	#N/A	#N/A	0	0	#N/A	#N/A	0	0	#N/A	#N/A	0	0	#N/A	#N/A	0	0	#N/A	#N/A	0
hsa-miR-7161-3p				0	#N/A	#N/A	#N/A	#N/A	#N/A	0	#N/A	#N/A	0	0	#N/A	#N/A	0	0	#N/A	#N/A	0	0	#N/A	#N/A	0	0	#N/A	#N/A	0	0	#N/A	#N/A	0
hsa-miR-548p				0	#N/A	#N/A	#N/A	#N/A	#N/A	0	#N/A	#N/A	0	0	#N/A	#N/A	0	0	#N/A	#N/A	0	0	#N/A	#N/A	0	0	#N/A	#N/A	0	0	#N/A	#N/A	0
hsa-miR-451b				0	#N/A	#N/A	#N/A	#N/A	#N/A	0	#N/A	#N/A	0	0	#N/A	#N/A	0	0	#N/A	#N/A	0	0	#N/A	#N/A	0	0	#N/A	#N/A	0	0	#N/A	#N/A	0
hsa-miR-4703-5p				0	#N/A	#N/A	#N/A	#N/A	#N/A	0	#N/A	#N/A	0	0	#N/A	#N/A	0	0	#N/A	#N/A	0	0	#N/A	#N/A	0	0	#N/A	#N/A	0	0	#N/A	#N/A	0
hsa-miR-29a-3p				0.333333	-5.81223	-2.53909	0.373209	#N/A	1	0	#N/A	#N/A	0	0	#N/A	#N/A	0	1	#N/A	#N/A	35.6651	0	#N/A	#N/A	0	0	#N/A	#N/A	0	0	#N/A	#N/A	0
hsa-miR-29b-3p				0.666667	4.18982	2.06689	0.415203	0.775924	1	0	#N/A	#N/A	0	0	#N/A	#N/A	0	0	#N/A	#N/A	0	1	#N/A	#N/A	41.7796	0	#N/A	#N/A	0	1	#N/A	#N/A	135.262
hsa-miR-29c-3p				0.333333	2.37647	1.24882	0.624194	#N/A	1	0	#N/A	#N/A	0	0	#N/A	#N/A	0	0	#N/A	#N/A	0	1	#N/A	#N/A	41.7796	0	#N/A	#N/A	0	0	#N/A	#N/A	0
hsa-miR-195-5p				0.666667	-2.34047	-1.2268	0.495332	0.841662	1	1	#N/A	#N/A	27.9497	0	#N/A	#N/A	0	1	#N/A	#N/A	35.6651	0	#N/A	#N/A	0	0	#N/A	#N/A	0	1	#N/A	#N/A	135.262
hsa-miR-15a-5p				0	#N/A	#N/A	#N/A	#N/A	#N/A	0	#N/A	#N/A	0	0	#N/A	#N/A	0	0	#N/A	#N/A	0	0	#N/A	#N/A	0	0	#N/A	#N/A	0	0	#N/A	#N/A	0
hsa-miR-15b-5p				1	-1.15992	-0.214025	0.911483	0.972248	1	2	#N/A	#N/A	55.8994	0	#N/A	#N/A	0	1	#N/A	#N/A	35.6651	3	#N/A	#N/A	125.339	0	#N/A	#N/A	0	0	#N/A	#N/A	0
hsa-miR-16-5p				24.6667	-2.71332	-1.44006	0.527044	0.843271	1	72	#N/A	#N/A	2012.38	0	#N/A	#N/A	0	2	#N/A	#N/A	71.3302	11	#N/A	#N/A	459.576	0	#N/A	#N/A	0	3	#N/A	#N/A	405.786
hsa-miR-503-5p				0	#N/A	#N/A	#N/A	#N/A	#N/A	0	#N/A	#N/A	0	0	#N/A	#N/A	0	0	#N/A	#N/A	0	0	#N/A	#N/A	0	0	#N/A	#N/A	0	0	#N/A	#N/A	0
hsa-miR-3943				0	#N/A	#N/A	#N/A	#N/A	#N/A	0	#N/A	#N/A	0	0	#N/A	#N/A	0	0	#N/A	#N/A	0	0	#N/A	#N/A	0	0	#N/A	#N/A	0	0	#N/A	#N/A	0
hsa-miR-3614-3p				0	#N/A	#N/A	#N/A	#N/A	#N/A	0	#N/A	#N/A	0	0	#N/A	#N/A	0	0	#N/A	#N/A	0	0	#N/A	#N/A	0	0	#N/A	#N/A	0	0	#N/A	#N/A	0
hsa-miR-4781-5p				0	#N/A	#N/A	#N/A	#N/A	#N/A	0	#N/A	#N/A	0	0	#N/A	#N/A	0	0	#N/A	#N/A	0	0	#N/A	#N/A	0	0	#N/A	#N/A	0	0	#N/A	#N/A	0
hsa-miR-21-5p				23.3333	-1.49138	-0.576644	0.826196	0.96669	1	69	#N/A	#N/A	1928.53	0	#N/A	#N/A	0	1	#N/A	#N/A	35.6651	33	#N/A	#N/A	1378.73	0	#N/A	#N/A	0	0	#N/A	#N/A	0
hsa-miR-1197				0	#N/A	#N/A	#N/A	#N/A	#N/A	0	#N/A	#N/A	0	0	#N/A	#N/A	0	0	#N/A	#N/A	0	0	#N/A	#N/A	0	0	#N/A	#N/A	0	0	#N/A	#N/A	0
hsa-miR-4759				0	#N/A	#N/A	#N/A	#N/A	#N/A	0	#N/A	#N/A	0	0	#N/A	#N/A	0	0	#N/A	#N/A	0	0	#N/A	#N/A	0	0	#N/A	#N/A	0	0	#N/A	#N/A	0
hsa-miR-3169				0	#N/A	#N/A	#N/A	#N/A	#N/A	0	#N/A	#N/A	0	0	#N/A	#N/A	0	0	#N/A	#N/A	0	0	#N/A	#N/A	0	0	#N/A	#N/A	0	0	#N/A	#N/A	0
hsa-miR-3139				0	#N/A	#N/A	#N/A	#N/A	#N/A	0	#N/A	#N/A	0	0	#N/A	#N/A	0	0	#N/A	#N/A	0	0	#N/A	#N/A	0	0	#N/A	#N/A	0	0	#N/A	#N/A	0
hsa-miR-4779				0	#N/A	#N/A	#N/A	#N/A	#N/A	0	#N/A	#N/A	0	0	#N/A	#N/A	0	0	#N/A	#N/A	0	0	#N/A	#N/A	0	0	#N/A	#N/A	0	0	#N/A	#N/A	0
hsa-miR-2392				0	#N/A	#N/A	#N/A	#N/A	#N/A	0	#N/A	#N/A	0	0	#N/A	#N/A	0	0	#N/A	#N/A	0	0	#N/A	#N/A	0	0	#N/A	#N/A	0	0	#N/A	#N/A	0
hsa-miR-3159				0	#N/A	#N/A	#N/A	#N/A	#N/A	0	#N/A	#N/A	0	0	#N/A	#N/A	0	0	#N/A	#N/A	0	0	#N/A	#N/A	0	0	#N/A	#N/A	0	0	#N/A	#N/A	0
hsa-miR-5582-5p				0	#N/A	#N/A	#N/A	#N/A	#N/A	0	#N/A	#N/A	0	0	#N/A	#N/A	0	0	#N/A	#N/A	0	0	#N/A	#N/A	0	0	#N/A	#N/A	0	0	#N/A	#N/A	0
hsa-miR-449c-5p				0	#N/A	#N/A	#N/A	#N/A	#N/A	0	#N/A	#N/A	0	0	#N/A	#N/A	0	0	#N/A	#N/A	0	0	#N/A	#N/A	0	0	#N/A	#N/A	0	0	#N/A	#N/A	0
hsa-miR-34b-5p				0	#N/A	#N/A	#N/A	#N/A	#N/A	0	#N/A	#N/A	0	0	#N/A	#N/A	0	0	#N/A	#N/A	0	0	#N/A	#N/A	0	0	#N/A	#N/A	0	0	#N/A	#N/A	0
hsa-miR-4717-5p				0	#N/A	#N/A	#N/A	#N/A	#N/A	0	#N/A	#N/A	0	0	#N/A	#N/A	0	0	#N/A	#N/A	0	0	#N/A	#N/A	0	0	#N/A	#N/A	0	0	#N/A	#N/A	0
hsa-miR-1245b-5p				0	#N/A	#N/A	#N/A	#N/A	#N/A	0	#N/A	#N/A	0	0	#N/A	#N/A	0	0	#N/A	#N/A	0	0	#N/A	#N/A	0	0	#N/A	#N/A	0	0	#N/A	#N/A	0
hsa-miR-6757-5p				0	#N/A	#N/A	#N/A	#N/A	#N/A	0	#N/A	#N/A	0	0	#N/A	#N/A	0	0	#N/A	#N/A	0	0	#N/A	#N/A	0	0	#N/A	#N/A	0	0	#N/A	#N/A	0
hsa-miR-6783-5p				0	#N/A	#N/A	#N/A	#N/A	#N/A	0	#N/A	#N/A	0	0	#N/A	#N/A	0	0	#N/A	#N/A	0	0	#N/A	#N/A	0	0	#N/A	#N/A	0	0	#N/A	#N/A	0
hsa-miR-4688				0	#N/A	#N/A	#N/A	#N/A	#N/A	0	#N/A	#N/A	0	0	#N/A	#N/A	0	0	#N/A	#N/A	0	0	#N/A	#N/A	0	0	#N/A	#N/A	0	0	#N/A	#N/A	0
hsa-miR-6805-5p				0	#N/A	#N/A	#N/A	#N/A	#N/A	0	#N/A	#N/A	0	0	#N/A	#N/A	0	0	#N/A	#N/A	0	0	#N/A	#N/A	0	0	#N/A	#N/A	0	0	#N/A	#N/A	0
hsa-miR-6732-5p				0	#N/A	#N/A	#N/A	#N/A	#N/A	0	#N/A	#N/A	0	0	#N/A	#N/A	0	0	#N/A	#N/A	0	0	#N/A	#N/A	0	0	#N/A	#N/A	0	0	#N/A	#N/A	0
hsa-miR-6782-5p				0	#N/A	#N/A	#N/A	#N/A	#N/A	0	#N/A	#N/A	0	0	#N/A	#N/A	0	0	#N/A	#N/A	0	0	#N/A	#N/A	0	0	#N/A	#N/A	0	0	#N/A	#N/A	0
hsa-miR-6841-5p				0	#N/A	#N/A	#N/A	#N/A	#N/A	0	#N/A	#N/A	0	0	#N/A	#N/A	0	0	#N/A	#N/A	0	0	#N/A	#N/A	0	0	#N/A	#N/A	0	0	#N/A	#N/A	0
hsa-miR-6755-5p				0	#N/A	#N/A	#N/A	#N/A	#N/A	0	#N/A	#N/A	0	0	#N/A	#N/A	0	0	#N/A	#N/A	0	0	#N/A	#N/A	0	0	#N/A	#N/A	0	0	#N/A	#N/A	0
hsa-miR-6831-5p				0	#N/A	#N/A	#N/A	#N/A	#N/A	0	#N/A	#N/A	0	0	#N/A	#N/A	0	0	#N/A	#N/A	0	0	#N/A	#N/A	0	0	#N/A	#N/A	0	0	#N/A	#N/A	0
hsa-miR-196a-5p				0.333333	2.37647	1.24882	0.624194	#N/A	1	0	#N/A	#N/A	0	0	#N/A	#N/A	0	0	#N/A	#N/A	0	1	#N/A	#N/A	41.7796	0	#N/A	#N/A	0	0	#N/A	#N/A	0
hsa-miR-196b-5p				0.333333	2.37647	1.24882	0.624194	#N/A	1	0	#N/A	#N/A	0	0	#N/A	#N/A	0	0	#N/A	#N/A	0	1	#N/A	#N/A	41.7796	0	#N/A	#N/A	0	0	#N/A	#N/A	0
hsa-miR-6865-5p				0	#N/A	#N/A	#N/A	#N/A	#N/A	0	#N/A	#N/A	0	0	#N/A	#N/A	0	0	#N/A	#N/A	0	0	#N/A	#N/A	0	0	#N/A	#N/A	0	0	#N/A	#N/A	0
hsa-miR-6815-5p				0	#N/A	#N/A	#N/A	#N/A	#N/A	0	#N/A	#N/A	0	0	#N/A	#N/A	0	0	#N/A	#N/A	0	0	#N/A	#N/A	0	0	#N/A	#N/A	0	0	#N/A	#N/A	0
hsa-miR-154-5p				24	49.9234	5.64164	0.049622	0.357279	1	1	#N/A	#N/A	27.9497	0	#N/A	#N/A	0	0	#N/A	#N/A	0	72	#N/A	#N/A	3008.13	0	#N/A	#N/A	0	0	#N/A	#N/A	0
hsa-miR-624-5p				0	#N/A	#N/A	#N/A	#N/A	#N/A	0	#N/A	#N/A	0	0	#N/A	#N/A	0	0	#N/A	#N/A	0	0	#N/A	#N/A	0	0	#N/A	#N/A	0	0	#N/A	#N/A	0
hsa-miR-1278				0	#N/A	#N/A	#N/A	#N/A	#N/A	0	#N/A	#N/A	0	0	#N/A	#N/A	0	0	#N/A	#N/A	0	0	#N/A	#N/A	0	0	#N/A	#N/A	0	0	#N/A	#N/A	0
hsa-miR-411-5p				72	-1.52512	-0.608921	0.784889	0.96669	1	215	#N/A	#N/A	6009.18	1	#N/A	#N/A	511.083	0	#N/A	#N/A	0	103	#N/A	#N/A	4303.3	1	#N/A	#N/A	19.4098	0	#N/A	#N/A	0
hsa-miR-2114-5p				0	#N/A	#N/A	#N/A	#N/A	#N/A	0	#N/A	#N/A	0	0	#N/A	#N/A	0	0	#N/A	#N/A	0	0	#N/A	#N/A	0	0	#N/A	#N/A	0	0	#N/A	#N/A	0
hsa-miR-3174				0	#N/A	#N/A	#N/A	#N/A	#N/A	0	#N/A	#N/A	0	0	#N/A	#N/A	0	0	#N/A	#N/A	0	0	#N/A	#N/A	0	0	#N/A	#N/A	0	0	#N/A	#N/A	0
hsa-miR-454-3p				0	#N/A	#N/A	#N/A	#N/A	#N/A	0	#N/A	#N/A	0	0	#N/A	#N/A	0	0	#N/A	#N/A	0	0	#N/A	#N/A	0	0	#N/A	#N/A	0	0	#N/A	#N/A	0
hsa-miR-12115				0	#N/A	#N/A	#N/A	#N/A	#N/A	0	#N/A	#N/A	0	0	#N/A	#N/A	0	0	#N/A	#N/A	0	0	#N/A	#N/A	0	0	#N/A	#N/A	0	0	#N/A	#N/A	0
hsa-miR-3681-5p				0	#N/A	#N/A	#N/A	#N/A	#N/A	0	#N/A	#N/A	0	0	#N/A	#N/A	0	0	#N/A	#N/A	0	0	#N/A	#N/A	0	0	#N/A	#N/A	0	0	#N/A	#N/A	0
hsa-miR-6718-5p				0	#N/A	#N/A	#N/A	#N/A	#N/A	0	#N/A	#N/A	0	0	#N/A	#N/A	0	0	#N/A	#N/A	0	0	#N/A	#N/A	0	0	#N/A	#N/A	0	0	#N/A	#N/A	0
hsa-miR-203b-5p				0	#N/A	#N/A	#N/A	#N/A	#N/A	0	#N/A	#N/A	0	0	#N/A	#N/A	0	0	#N/A	#N/A	0	0	#N/A	#N/A	0	0	#N/A	#N/A	0	0	#N/A	#N/A	0
hsa-miR-5584-3p				0	#N/A	#N/A	#N/A	#N/A	#N/A	0	#N/A	#N/A	0	0	#N/A	#N/A	0	0	#N/A	#N/A	0	0	#N/A	#N/A	0	0	#N/A	#N/A	0	0	#N/A	#N/A	0
hsa-miR-3163				0	#N/A	#N/A	#N/A	#N/A	#N/A	0	#N/A	#N/A	0	0	#N/A	#N/A	0	0	#N/A	#N/A	0	0	#N/A	#N/A	0	0	#N/A	#N/A	0	0	#N/A	#N/A	0
hsa-miR-381-3p				0.666667	-9.85151	-3.30035	0.229306	0.651646	1	2	#N/A	#N/A	55.8994	0	#N/A	#N/A	0	0	#N/A	#N/A	0	0	#N/A	#N/A	0	0	#N/A	#N/A	0	0	#N/A	#N/A	0
hsa-miR-300				0	#N/A	#N/A	#N/A	#N/A	#N/A	0	#N/A	#N/A	0	0	#N/A	#N/A	0	0	#N/A	#N/A	0	0	#N/A	#N/A	0	0	#N/A	#N/A	0	0	#N/A	#N/A	0
hsa-miR-875-5p				0	#N/A	#N/A	#N/A	#N/A	#N/A	0	#N/A	#N/A	0	0	#N/A	#N/A	0	0	#N/A	#N/A	0	0	#N/A	#N/A	0	0	#N/A	#N/A	0	0	#N/A	#N/A	0
hsa-miR-3976				0	#N/A	#N/A	#N/A	#N/A	#N/A	0	#N/A	#N/A	0	0	#N/A	#N/A	0	0	#N/A	#N/A	0	0	#N/A	#N/A	0	0	#N/A	#N/A	0	0	#N/A	#N/A	0
hsa-miR-135a-3p				0	#N/A	#N/A	#N/A	#N/A	#N/A	0	#N/A	#N/A	0	0	#N/A	#N/A	0	0	#N/A	#N/A	0	0	#N/A	#N/A	0	0	#N/A	#N/A	0	0	#N/A	#N/A	0
hsa-miR-5011-5p				0	#N/A	#N/A	#N/A	#N/A	#N/A	0	#N/A	#N/A	0	0	#N/A	#N/A	0	0	#N/A	#N/A	0	0	#N/A	#N/A	0	0	#N/A	#N/A	0	0	#N/A	#N/A	0
hsa-miR-8076				0	#N/A	#N/A	#N/A	#N/A	#N/A	0	#N/A	#N/A	0	0	#N/A	#N/A	0	0	#N/A	#N/A	0	0	#N/A	#N/A	0	0	#N/A	#N/A	0	0	#N/A	#N/A	0
hsa-miR-2681-3p				0	#N/A	#N/A	#N/A	#N/A	#N/A	0	#N/A	#N/A	0	0	#N/A	#N/A	0	0	#N/A	#N/A	0	0	#N/A	#N/A	0	0	#N/A	#N/A	0	0	#N/A	#N/A	0
hsa-miR-5586-5p				0	#N/A	#N/A	#N/A	#N/A	#N/A	0	#N/A	#N/A	0	0	#N/A	#N/A	0	0	#N/A	#N/A	0	0	#N/A	#N/A	0	0	#N/A	#N/A	0	0	#N/A	#N/A	0
hsa-miR-4686				0	#N/A	#N/A	#N/A	#N/A	#N/A	0	#N/A	#N/A	0	0	#N/A	#N/A	0	0	#N/A	#N/A	0	0	#N/A	#N/A	0	0	#N/A	#N/A	0	0	#N/A	#N/A	0
hsa-miR-586				0	#N/A	#N/A	#N/A	#N/A	#N/A	0	#N/A	#N/A	0	0	#N/A	#N/A	0	0	#N/A	#N/A	0	0	#N/A	#N/A	0	0	#N/A	#N/A	0	0	#N/A	#N/A	0
hsa-miR-3688-3p				0	#N/A	#N/A	#N/A	#N/A	#N/A	0	#N/A	#N/A	0	0	#N/A	#N/A	0	0	#N/A	#N/A	0	0	#N/A	#N/A	0	0	#N/A	#N/A	0	0	#N/A	#N/A	0
hsa-miR-1843				0	#N/A	#N/A	#N/A	#N/A	#N/A	0	#N/A	#N/A	0	0	#N/A	#N/A	0	0	#N/A	#N/A	0	0	#N/A	#N/A	0	0	#N/A	#N/A	0	0	#N/A	#N/A	0
hsa-miR-4802-5p				0	#N/A	#N/A	#N/A	#N/A	#N/A	0	#N/A	#N/A	0	0	#N/A	#N/A	0	0	#N/A	#N/A	0	0	#N/A	#N/A	0	0	#N/A	#N/A	0	0	#N/A	#N/A	0
hsa-miR-6514-5p				0	#N/A	#N/A	#N/A	#N/A	#N/A	0	#N/A	#N/A	0	0	#N/A	#N/A	0	0	#N/A	#N/A	0	0	#N/A	#N/A	0	0	#N/A	#N/A	0	0	#N/A	#N/A	0
hsa-miR-183-5p				0	#N/A	#N/A	#N/A	#N/A	#N/A	0	#N/A	#N/A	0	0	#N/A	#N/A	0	0	#N/A	#N/A	0	0	#N/A	#N/A	0	0	#N/A	#N/A	0	0	#N/A	#N/A	0
hsa-miR-135b-5p				0.666667	4.18982	2.06689	0.417622	0.775924	1	0	#N/A	#N/A	0	0	#N/A	#N/A	0	0	#N/A	#N/A	0	1	#N/A	#N/A	41.7796	0	#N/A	#N/A	0	1	#N/A	#N/A	135.262
hsa-miR-135a-5p				0	#N/A	#N/A	#N/A	#N/A	#N/A	0	#N/A	#N/A	0	0	#N/A	#N/A	0	0	#N/A	#N/A	0	0	#N/A	#N/A	0	0	#N/A	#N/A	0	0	#N/A	#N/A	0
hsa-miR-3675-5p				0	#N/A	#N/A	#N/A	#N/A	#N/A	0	#N/A	#N/A	0	0	#N/A	#N/A	0	0	#N/A	#N/A	0	0	#N/A	#N/A	0	0	#N/A	#N/A	0	0	#N/A	#N/A	0
hsa-miR-5579-5p				0	#N/A	#N/A	#N/A	#N/A	#N/A	0	#N/A	#N/A	0	0	#N/A	#N/A	0	0	#N/A	#N/A	0	0	#N/A	#N/A	0	0	#N/A	#N/A	0	0	#N/A	#N/A	0
hsa-miR-411-3p				0.333333	2.37647	1.24882	0.624194	#N/A	1	0	#N/A	#N/A	0	0	#N/A	#N/A	0	0	#N/A	#N/A	0	1	#N/A	#N/A	41.7796	0	#N/A	#N/A	0	0	#N/A	#N/A	0
hsa-miR-379-3p				0	#N/A	#N/A	#N/A	#N/A	#N/A	0	#N/A	#N/A	0	0	#N/A	#N/A	0	0	#N/A	#N/A	0	0	#N/A	#N/A	0	0	#N/A	#N/A	0	0	#N/A	#N/A	0
hsa-miR-380-3p				0	#N/A	#N/A	#N/A	#N/A	#N/A	0	#N/A	#N/A	0	0	#N/A	#N/A	0	0	#N/A	#N/A	0	0	#N/A	#N/A	0	0	#N/A	#N/A	0	0	#N/A	#N/A	0
hsa-miR-7852-3p				0	#N/A	#N/A	#N/A	#N/A	#N/A	0	#N/A	#N/A	0	0	#N/A	#N/A	0	0	#N/A	#N/A	0	0	#N/A	#N/A	0	0	#N/A	#N/A	0	0	#N/A	#N/A	0
hsa-miR-6834-3p				0	#N/A	#N/A	#N/A	#N/A	#N/A	0	#N/A	#N/A	0	0	#N/A	#N/A	0	0	#N/A	#N/A	0	0	#N/A	#N/A	0	0	#N/A	#N/A	0	0	#N/A	#N/A	0
hsa-miR-654-3p				0.333333	2.37647	1.24882	0.624194	#N/A	1	0	#N/A	#N/A	0	0	#N/A	#N/A	0	0	#N/A	#N/A	0	1	#N/A	#N/A	41.7796	0	#N/A	#N/A	0	0	#N/A	#N/A	0
hsa-miR-4501				0	#N/A	#N/A	#N/A	#N/A	#N/A	0	#N/A	#N/A	0	0	#N/A	#N/A	0	0	#N/A	#N/A	0	0	#N/A	#N/A	0	0	#N/A	#N/A	0	0	#N/A	#N/A	0
hsa-miR-455-5p				0	#N/A	#N/A	#N/A	#N/A	#N/A	0	#N/A	#N/A	0	0	#N/A	#N/A	0	0	#N/A	#N/A	0	0	#N/A	#N/A	0	0	#N/A	#N/A	0	0	#N/A	#N/A	0
hsa-miR-299-3p				0	#N/A	#N/A	#N/A	#N/A	#N/A	0	#N/A	#N/A	0	0	#N/A	#N/A	0	0	#N/A	#N/A	0	0	#N/A	#N/A	0	0	#N/A	#N/A	0	0	#N/A	#N/A	0
hsa-miR-12132				0	#N/A	#N/A	#N/A	#N/A	#N/A	0	#N/A	#N/A	0	0	#N/A	#N/A	0	0	#N/A	#N/A	0	0	#N/A	#N/A	0	0	#N/A	#N/A	0	0	#N/A	#N/A	0
hsa-miR-892c-5p				0	#N/A	#N/A	#N/A	#N/A	#N/A	0	#N/A	#N/A	0	0	#N/A	#N/A	0	0	#N/A	#N/A	0	0	#N/A	#N/A	0	0	#N/A	#N/A	0	0	#N/A	#N/A	0
hsa-miR-506-5p				0	#N/A	#N/A	#N/A	#N/A	#N/A	0	#N/A	#N/A	0	0	#N/A	#N/A	0	0	#N/A	#N/A	0	0	#N/A	#N/A	0	0	#N/A	#N/A	0	0	#N/A	#N/A	0
hsa-miR-664a-3p				0.333333	2.37647	1.24882	0.624194	#N/A	1	0	#N/A	#N/A	0	0	#N/A	#N/A	0	0	#N/A	#N/A	0	1	#N/A	#N/A	41.7796	0	#N/A	#N/A	0	0	#N/A	#N/A	0
hsa-miR-32-5p				0	#N/A	#N/A	#N/A	#N/A	#N/A	0	#N/A	#N/A	0	0	#N/A	#N/A	0	0	#N/A	#N/A	0	0	#N/A	#N/A	0	0	#N/A	#N/A	0	0	#N/A	#N/A	0
hsa-miR-92b-3p				583	1.06598	0.0921751	0.967573	0.982521	1	120	#N/A	#N/A	3353.96	0	#N/A	#N/A	0	1385	#N/A	#N/A	49396.2	998	#N/A	#N/A	41696	750	#N/A	#N/A	14557.4	1	#N/A	#N/A	135.262
hsa-miR-92a-3p				2158.33	1.57954	0.659503	0.52446	0.843271	1	2298	#N/A	#N/A	64228.4	22	#N/A	#N/A	11243.8	1689	#N/A	#N/A	60238.4	2778	#N/A	#N/A	116064	3455	#N/A	#N/A	67061	242	#N/A	#N/A	32733.4
hsa-miR-1323				0	#N/A	#N/A	#N/A	#N/A	#N/A	0	#N/A	#N/A	0	0	#N/A	#N/A	0	0	#N/A	#N/A	0	0	#N/A	#N/A	0	0	#N/A	#N/A	0	0	#N/A	#N/A	0
hsa-miR-8063				0	#N/A	#N/A	#N/A	#N/A	#N/A	0	#N/A	#N/A	0	0	#N/A	#N/A	0	0	#N/A	#N/A	0	0	#N/A	#N/A	0	0	#N/A	#N/A	0	0	#N/A	#N/A	0
hsa-miR-4698				0	#N/A	#N/A	#N/A	#N/A	#N/A	0	#N/A	#N/A	0	0	#N/A	#N/A	0	0	#N/A	#N/A	0	0	#N/A	#N/A	0	0	#N/A	#N/A	0	0	#N/A	#N/A	0
hsa-miR-7853-5p				0	#N/A	#N/A	#N/A	#N/A	#N/A	0	#N/A	#N/A	0	0	#N/A	#N/A	0	0	#N/A	#N/A	0	0	#N/A	#N/A	0	0	#N/A	#N/A	0	0	#N/A	#N/A	0
hsa-miR-105-5p				0	#N/A	#N/A	#N/A	#N/A	#N/A	0	#N/A	#N/A	0	0	#N/A	#N/A	0	0	#N/A	#N/A	0	0	#N/A	#N/A	0	0	#N/A	#N/A	0	0	#N/A	#N/A	0
hsa-miR-3065-5p				0	#N/A	#N/A	#N/A	#N/A	#N/A	0	#N/A	#N/A	0	0	#N/A	#N/A	0	0	#N/A	#N/A	0	0	#N/A	#N/A	0	0	#N/A	#N/A	0	0	#N/A	#N/A	0
hsa-miR-335-5p				0	#N/A	#N/A	#N/A	#N/A	#N/A	0	#N/A	#N/A	0	0	#N/A	#N/A	0	0	#N/A	#N/A	0	0	#N/A	#N/A	0	0	#N/A	#N/A	0	0	#N/A	#N/A	0
hsa-miR-3922-5p				0	#N/A	#N/A	#N/A	#N/A	#N/A	0	#N/A	#N/A	0	0	#N/A	#N/A	0	0	#N/A	#N/A	0	0	#N/A	#N/A	0	0	#N/A	#N/A	0	0	#N/A	#N/A	0
hsa-miR-5697				0	#N/A	#N/A	#N/A	#N/A	#N/A	0	#N/A	#N/A	0	0	#N/A	#N/A	0	0	#N/A	#N/A	0	0	#N/A	#N/A	0	0	#N/A	#N/A	0	0	#N/A	#N/A	0
hsa-miR-224-5p				0	#N/A	#N/A	#N/A	#N/A	#N/A	0	#N/A	#N/A	0	0	#N/A	#N/A	0	0	#N/A	#N/A	0	0	#N/A	#N/A	0	0	#N/A	#N/A	0	0	#N/A	#N/A	0
hsa-miR-6513-3p				0	#N/A	#N/A	#N/A	#N/A	#N/A	0	#N/A	#N/A	0	0	#N/A	#N/A	0	0	#N/A	#N/A	0	0	#N/A	#N/A	0	0	#N/A	#N/A	0	0	#N/A	#N/A	0
hsa-miR-95-5p				0	#N/A	#N/A	#N/A	#N/A	#N/A	0	#N/A	#N/A	0	0	#N/A	#N/A	0	0	#N/A	#N/A	0	0	#N/A	#N/A	0	0	#N/A	#N/A	0	0	#N/A	#N/A	0
hsa-miR-6826-5p				0	#N/A	#N/A	#N/A	#N/A	#N/A	0	#N/A	#N/A	0	0	#N/A	#N/A	0	0	#N/A	#N/A	0	0	#N/A	#N/A	0	0	#N/A	#N/A	0	0	#N/A	#N/A	0
hsa-miR-4705				0	#N/A	#N/A	#N/A	#N/A	#N/A	0	#N/A	#N/A	0	0	#N/A	#N/A	0	0	#N/A	#N/A	0	0	#N/A	#N/A	0	0	#N/A	#N/A	0	0	#N/A	#N/A	0
hsa-miR-4719				0	#N/A	#N/A	#N/A	#N/A	#N/A	0	#N/A	#N/A	0	0	#N/A	#N/A	0	0	#N/A	#N/A	0	0	#N/A	#N/A	0	0	#N/A	#N/A	0	0	#N/A	#N/A	0
hsa-miR-5003-5p				0	#N/A	#N/A	#N/A	#N/A	#N/A	0	#N/A	#N/A	0	0	#N/A	#N/A	0	0	#N/A	#N/A	0	0	#N/A	#N/A	0	0	#N/A	#N/A	0	0	#N/A	#N/A	0
hsa-miR-4457				0	#N/A	#N/A	#N/A	#N/A	#N/A	0	#N/A	#N/A	0	0	#N/A	#N/A	0	0	#N/A	#N/A	0	0	#N/A	#N/A	0	0	#N/A	#N/A	0	0	#N/A	#N/A	0
hsa-miR-125b-2-3p				0	#N/A	#N/A	#N/A	#N/A	#N/A	0	#N/A	#N/A	0	0	#N/A	#N/A	0	0	#N/A	#N/A	0	0	#N/A	#N/A	0	0	#N/A	#N/A	0	0	#N/A	#N/A	0
hsa-miR-1228-3p				0	#N/A	#N/A	#N/A	#N/A	#N/A	0	#N/A	#N/A	0	0	#N/A	#N/A	0	0	#N/A	#N/A	0	0	#N/A	#N/A	0	0	#N/A	#N/A	0	0	#N/A	#N/A	0
hsa-miR-128-3p				0	#N/A	#N/A	#N/A	#N/A	#N/A	0	#N/A	#N/A	0	0	#N/A	#N/A	0	0	#N/A	#N/A	0	0	#N/A	#N/A	0	0	#N/A	#N/A	0	0	#N/A	#N/A	0
hsa-miR-216a-3p				0	#N/A	#N/A	#N/A	#N/A	#N/A	0	#N/A	#N/A	0	0	#N/A	#N/A	0	0	#N/A	#N/A	0	0	#N/A	#N/A	0	0	#N/A	#N/A	0	0	#N/A	#N/A	0
hsa-miR-1226-3p				0	#N/A	#N/A	#N/A	#N/A	#N/A	0	#N/A	#N/A	0	0	#N/A	#N/A	0	0	#N/A	#N/A	0	0	#N/A	#N/A	0	0	#N/A	#N/A	0	0	#N/A	#N/A	0
hsa-miR-3620-3p				0	#N/A	#N/A	#N/A	#N/A	#N/A	0	#N/A	#N/A	0	0	#N/A	#N/A	0	0	#N/A	#N/A	0	0	#N/A	#N/A	0	0	#N/A	#N/A	0	0	#N/A	#N/A	0
hsa-miR-3622a-3p				0	#N/A	#N/A	#N/A	#N/A	#N/A	0	#N/A	#N/A	0	0	#N/A	#N/A	0	0	#N/A	#N/A	0	0	#N/A	#N/A	0	0	#N/A	#N/A	0	0	#N/A	#N/A	0
hsa-miR-3622b-3p				0	#N/A	#N/A	#N/A	#N/A	#N/A	0	#N/A	#N/A	0	0	#N/A	#N/A	0	0	#N/A	#N/A	0	0	#N/A	#N/A	0	0	#N/A	#N/A	0	0	#N/A	#N/A	0
hsa-miR-6765-3p				0	#N/A	#N/A	#N/A	#N/A	#N/A	0	#N/A	#N/A	0	0	#N/A	#N/A	0	0	#N/A	#N/A	0	0	#N/A	#N/A	0	0	#N/A	#N/A	0	0	#N/A	#N/A	0
hsa-miR-3186-3p				0	#N/A	#N/A	#N/A	#N/A	#N/A	0	#N/A	#N/A	0	0	#N/A	#N/A	0	0	#N/A	#N/A	0	0	#N/A	#N/A	0	0	#N/A	#N/A	0	0	#N/A	#N/A	0
hsa-miR-11401				0	#N/A	#N/A	#N/A	#N/A	#N/A	0	#N/A	#N/A	0	0	#N/A	#N/A	0	0	#N/A	#N/A	0	0	#N/A	#N/A	0	0	#N/A	#N/A	0	0	#N/A	#N/A	0
hsa-miR-4999-3p				0	#N/A	#N/A	#N/A	#N/A	#N/A	0	#N/A	#N/A	0	0	#N/A	#N/A	0	0	#N/A	#N/A	0	0	#N/A	#N/A	0	0	#N/A	#N/A	0	0	#N/A	#N/A	0
hsa-miR-483-3p				0	#N/A	#N/A	#N/A	#N/A	#N/A	0	#N/A	#N/A	0	0	#N/A	#N/A	0	0	#N/A	#N/A	0	0	#N/A	#N/A	0	0	#N/A	#N/A	0	0	#N/A	#N/A	0
hsa-miR-4639-3p				0	#N/A	#N/A	#N/A	#N/A	#N/A	0	#N/A	#N/A	0	0	#N/A	#N/A	0	0	#N/A	#N/A	0	0	#N/A	#N/A	0	0	#N/A	#N/A	0	0	#N/A	#N/A	0
hsa-miR-1208				0	#N/A	#N/A	#N/A	#N/A	#N/A	0	#N/A	#N/A	0	0	#N/A	#N/A	0	0	#N/A	#N/A	0	0	#N/A	#N/A	0	0	#N/A	#N/A	0	0	#N/A	#N/A	0
hsa-miR-589-3p				0.333333	-5.81155	-2.53892	0.373246	#N/A	1	1	#N/A	#N/A	27.9497	0	#N/A	#N/A	0	0	#N/A	#N/A	0	0	#N/A	#N/A	0	0	#N/A	#N/A	0	0	#N/A	#N/A	0
hsa-miR-1245b-3p				0	#N/A	#N/A	#N/A	#N/A	#N/A	0	#N/A	#N/A	0	0	#N/A	#N/A	0	0	#N/A	#N/A	0	0	#N/A	#N/A	0	0	#N/A	#N/A	0	0	#N/A	#N/A	0
hsa-miR-545-3p				0	#N/A	#N/A	#N/A	#N/A	#N/A	0	#N/A	#N/A	0	0	#N/A	#N/A	0	0	#N/A	#N/A	0	0	#N/A	#N/A	0	0	#N/A	#N/A	0	0	#N/A	#N/A	0
hsa-miR-3065-3p				0	#N/A	#N/A	#N/A	#N/A	#N/A	0	#N/A	#N/A	0	0	#N/A	#N/A	0	0	#N/A	#N/A	0	0	#N/A	#N/A	0	0	#N/A	#N/A	0	0	#N/A	#N/A	0
hsa-miR-3619-5p				0	#N/A	#N/A	#N/A	#N/A	#N/A	0	#N/A	#N/A	0	0	#N/A	#N/A	0	0	#N/A	#N/A	0	0	#N/A	#N/A	0	0	#N/A	#N/A	0	0	#N/A	#N/A	0
hsa-miR-7157-5p				0	#N/A	#N/A	#N/A	#N/A	#N/A	0	#N/A	#N/A	0	0	#N/A	#N/A	0	0	#N/A	#N/A	0	0	#N/A	#N/A	0	0	#N/A	#N/A	0	0	#N/A	#N/A	0
hsa-miR-5690				0	#N/A	#N/A	#N/A	#N/A	#N/A	0	#N/A	#N/A	0	0	#N/A	#N/A	0	0	#N/A	#N/A	0	0	#N/A	#N/A	0	0	#N/A	#N/A	0	0	#N/A	#N/A	0
hsa-miR-6736-3p				0	#N/A	#N/A	#N/A	#N/A	#N/A	0	#N/A	#N/A	0	0	#N/A	#N/A	0	0	#N/A	#N/A	0	0	#N/A	#N/A	0	0	#N/A	#N/A	0	0	#N/A	#N/A	0
hsa-miR-1207-3p				0	#N/A	#N/A	#N/A	#N/A	#N/A	0	#N/A	#N/A	0	0	#N/A	#N/A	0	0	#N/A	#N/A	0	0	#N/A	#N/A	0	0	#N/A	#N/A	0	0	#N/A	#N/A	0
hsa-miR-5000-3p				0	#N/A	#N/A	#N/A	#N/A	#N/A	0	#N/A	#N/A	0	0	#N/A	#N/A	0	0	#N/A	#N/A	0	0	#N/A	#N/A	0	0	#N/A	#N/A	0	0	#N/A	#N/A	0
hsa-miR-4742-5p				0	#N/A	#N/A	#N/A	#N/A	#N/A	0	#N/A	#N/A	0	0	#N/A	#N/A	0	0	#N/A	#N/A	0	0	#N/A	#N/A	0	0	#N/A	#N/A	0	0	#N/A	#N/A	0
hsa-miR-4692				0	#N/A	#N/A	#N/A	#N/A	#N/A	0	#N/A	#N/A	0	0	#N/A	#N/A	0	0	#N/A	#N/A	0	0	#N/A	#N/A	0	0	#N/A	#N/A	0	0	#N/A	#N/A	0
hsa-miR-1972				0	#N/A	#N/A	#N/A	#N/A	#N/A	0	#N/A	#N/A	0	0	#N/A	#N/A	0	0	#N/A	#N/A	0	0	#N/A	#N/A	0	0	#N/A	#N/A	0	0	#N/A	#N/A	0
hsa-miR-4650-5p				0	#N/A	#N/A	#N/A	#N/A	#N/A	0	#N/A	#N/A	0	0	#N/A	#N/A	0	0	#N/A	#N/A	0	0	#N/A	#N/A	0	0	#N/A	#N/A	0	0	#N/A	#N/A	0
hsa-miR-484				1.33333	-17.9341	-4.16463	0.133643	0.601882	1	2	#N/A	#N/A	55.8994	0	#N/A	#N/A	0	2	#N/A	#N/A	71.3302	0	#N/A	#N/A	0	0	#N/A	#N/A	0	0	#N/A	#N/A	0
hsa-miR-4270				0	#N/A	#N/A	#N/A	#N/A	#N/A	0	#N/A	#N/A	0	0	#N/A	#N/A	0	0	#N/A	#N/A	0	0	#N/A	#N/A	0	0	#N/A	#N/A	0	0	#N/A	#N/A	0
hsa-miR-6823-5p				0	#N/A	#N/A	#N/A	#N/A	#N/A	0	#N/A	#N/A	0	0	#N/A	#N/A	0	0	#N/A	#N/A	0	0	#N/A	#N/A	0	0	#N/A	#N/A	0	0	#N/A	#N/A	0
hsa-miR-3934-5p				0	#N/A	#N/A	#N/A	#N/A	#N/A	0	#N/A	#N/A	0	0	#N/A	#N/A	0	0	#N/A	#N/A	0	0	#N/A	#N/A	0	0	#N/A	#N/A	0	0	#N/A	#N/A	0
hsa-miR-545-5p				0	#N/A	#N/A	#N/A	#N/A	#N/A	0	#N/A	#N/A	0	0	#N/A	#N/A	0	0	#N/A	#N/A	0	0	#N/A	#N/A	0	0	#N/A	#N/A	0	0	#N/A	#N/A	0
hsa-miR-4704-3p				0	#N/A	#N/A	#N/A	#N/A	#N/A	0	#N/A	#N/A	0	0	#N/A	#N/A	0	0	#N/A	#N/A	0	0	#N/A	#N/A	0	0	#N/A	#N/A	0	0	#N/A	#N/A	0
hsa-miR-148a-3p				1.33333	12.9899	3.69931	0.159492	0.620728	1	0	#N/A	#N/A	0	0	#N/A	#N/A	0	0	#N/A	#N/A	0	2	#N/A	#N/A	83.5592	0	#N/A	#N/A	0	2	#N/A	#N/A	270.524
hsa-miR-148b-3p				0	#N/A	#N/A	#N/A	#N/A	#N/A	0	#N/A	#N/A	0	0	#N/A	#N/A	0	0	#N/A	#N/A	0	0	#N/A	#N/A	0	0	#N/A	#N/A	0	0	#N/A	#N/A	0
hsa-miR-152-3p				0	#N/A	#N/A	#N/A	#N/A	#N/A	0	#N/A	#N/A	0	0	#N/A	#N/A	0	0	#N/A	#N/A	0	0	#N/A	#N/A	0	0	#N/A	#N/A	0	0	#N/A	#N/A	0
hsa-miR-6733-3p				0	#N/A	#N/A	#N/A	#N/A	#N/A	0	#N/A	#N/A	0	0	#N/A	#N/A	0	0	#N/A	#N/A	0	0	#N/A	#N/A	0	0	#N/A	#N/A	0	0	#N/A	#N/A	0
hsa-miR-584-3p				0	#N/A	#N/A	#N/A	#N/A	#N/A	0	#N/A	#N/A	0	0	#N/A	#N/A	0	0	#N/A	#N/A	0	0	#N/A	#N/A	0	0	#N/A	#N/A	0	0	#N/A	#N/A	0
hsa-miR-103b				0	#N/A	#N/A	#N/A	#N/A	#N/A	0	#N/A	#N/A	0	0	#N/A	#N/A	0	0	#N/A	#N/A	0	0	#N/A	#N/A	0	0	#N/A	#N/A	0	0	#N/A	#N/A	0
hsa-miR-1279				0	#N/A	#N/A	#N/A	#N/A	#N/A	0	#N/A	#N/A	0	0	#N/A	#N/A	0	0	#N/A	#N/A	0	0	#N/A	#N/A	0	0	#N/A	#N/A	0	0	#N/A	#N/A	0
hsa-miR-6729-3p				0	#N/A	#N/A	#N/A	#N/A	#N/A	0	#N/A	#N/A	0	0	#N/A	#N/A	0	0	#N/A	#N/A	0	0	#N/A	#N/A	0	0	#N/A	#N/A	0	0	#N/A	#N/A	0
hsa-miR-5196-3p				0	#N/A	#N/A	#N/A	#N/A	#N/A	0	#N/A	#N/A	0	0	#N/A	#N/A	0	0	#N/A	#N/A	0	0	#N/A	#N/A	0	0	#N/A	#N/A	0	0	#N/A	#N/A	0
hsa-miR-4528				0	#N/A	#N/A	#N/A	#N/A	#N/A	0	#N/A	#N/A	0	0	#N/A	#N/A	0	0	#N/A	#N/A	0	0	#N/A	#N/A	0	0	#N/A	#N/A	0	0	#N/A	#N/A	0
hsa-miR-4729				0	#N/A	#N/A	#N/A	#N/A	#N/A	0	#N/A	#N/A	0	0	#N/A	#N/A	0	0	#N/A	#N/A	0	0	#N/A	#N/A	0	0	#N/A	#N/A	0	0	#N/A	#N/A	0
hsa-miR-153-5p				0	#N/A	#N/A	#N/A	#N/A	#N/A	0	#N/A	#N/A	0	0	#N/A	#N/A	0	0	#N/A	#N/A	0	0	#N/A	#N/A	0	0	#N/A	#N/A	0	0	#N/A	#N/A	0
hsa-miR-6777-3p				0	#N/A	#N/A	#N/A	#N/A	#N/A	0	#N/A	#N/A	0	0	#N/A	#N/A	0	0	#N/A	#N/A	0	0	#N/A	#N/A	0	0	#N/A	#N/A	0	0	#N/A	#N/A	0
hsa-miR-338-3p				0	#N/A	#N/A	#N/A	#N/A	#N/A	0	#N/A	#N/A	0	0	#N/A	#N/A	0	0	#N/A	#N/A	0	0	#N/A	#N/A	0	0	#N/A	#N/A	0	0	#N/A	#N/A	0
hsa-miR-4267				0	#N/A	#N/A	#N/A	#N/A	#N/A	0	#N/A	#N/A	0	0	#N/A	#N/A	0	0	#N/A	#N/A	0	0	#N/A	#N/A	0	0	#N/A	#N/A	0	0	#N/A	#N/A	0
hsa-miR-4673				0	#N/A	#N/A	#N/A	#N/A	#N/A	0	#N/A	#N/A	0	0	#N/A	#N/A	0	0	#N/A	#N/A	0	0	#N/A	#N/A	0	0	#N/A	#N/A	0	0	#N/A	#N/A	0
hsa-miR-7113-5p				0	#N/A	#N/A	#N/A	#N/A	#N/A	0	#N/A	#N/A	0	0	#N/A	#N/A	0	0	#N/A	#N/A	0	0	#N/A	#N/A	0	0	#N/A	#N/A	0	0	#N/A	#N/A	0
hsa-miR-4712-5p				0	#N/A	#N/A	#N/A	#N/A	#N/A	0	#N/A	#N/A	0	0	#N/A	#N/A	0	0	#N/A	#N/A	0	0	#N/A	#N/A	0	0	#N/A	#N/A	0	0	#N/A	#N/A	0
hsa-miR-770-5p				0	#N/A	#N/A	#N/A	#N/A	#N/A	0	#N/A	#N/A	0	0	#N/A	#N/A	0	0	#N/A	#N/A	0	0	#N/A	#N/A	0	0	#N/A	#N/A	0	0	#N/A	#N/A	0
hsa-miR-1825				0	#N/A	#N/A	#N/A	#N/A	#N/A	0	#N/A	#N/A	0	0	#N/A	#N/A	0	0	#N/A	#N/A	0	0	#N/A	#N/A	0	0	#N/A	#N/A	0	0	#N/A	#N/A	0
hsa-miR-4716-5p				0	#N/A	#N/A	#N/A	#N/A	#N/A	0	#N/A	#N/A	0	0	#N/A	#N/A	0	0	#N/A	#N/A	0	0	#N/A	#N/A	0	0	#N/A	#N/A	0	0	#N/A	#N/A	0
hsa-miR-885-5p				0	#N/A	#N/A	#N/A	#N/A	#N/A	0	#N/A	#N/A	0	0	#N/A	#N/A	0	0	#N/A	#N/A	0	0	#N/A	#N/A	0	0	#N/A	#N/A	0	0	#N/A	#N/A	0
hsa-miR-6814-5p				0	#N/A	#N/A	#N/A	#N/A	#N/A	0	#N/A	#N/A	0	0	#N/A	#N/A	0	0	#N/A	#N/A	0	0	#N/A	#N/A	0	0	#N/A	#N/A	0	0	#N/A	#N/A	0
hsa-miR-662				0	#N/A	#N/A	#N/A	#N/A	#N/A	0	#N/A	#N/A	0	0	#N/A	#N/A	0	0	#N/A	#N/A	0	0	#N/A	#N/A	0	0	#N/A	#N/A	0	0	#N/A	#N/A	0
hsa-miR-4301				0	#N/A	#N/A	#N/A	#N/A	#N/A	0	#N/A	#N/A	0	0	#N/A	#N/A	0	0	#N/A	#N/A	0	0	#N/A	#N/A	0	0	#N/A	#N/A	0	0	#N/A	#N/A	0
hsa-miR-6764-5p				0	#N/A	#N/A	#N/A	#N/A	#N/A	0	#N/A	#N/A	0	0	#N/A	#N/A	0	0	#N/A	#N/A	0	0	#N/A	#N/A	0	0	#N/A	#N/A	0	0	#N/A	#N/A	0
hsa-miR-6793-3p				0	#N/A	#N/A	#N/A	#N/A	#N/A	0	#N/A	#N/A	0	0	#N/A	#N/A	0	0	#N/A	#N/A	0	0	#N/A	#N/A	0	0	#N/A	#N/A	0	0	#N/A	#N/A	0
hsa-miR-361-3p				0	#N/A	#N/A	#N/A	#N/A	#N/A	0	#N/A	#N/A	0	0	#N/A	#N/A	0	0	#N/A	#N/A	0	0	#N/A	#N/A	0	0	#N/A	#N/A	0	0	#N/A	#N/A	0
hsa-miR-6887-3p				0	#N/A	#N/A	#N/A	#N/A	#N/A	0	#N/A	#N/A	0	0	#N/A	#N/A	0	0	#N/A	#N/A	0	0	#N/A	#N/A	0	0	#N/A	#N/A	0	0	#N/A	#N/A	0
hsa-miR-6810-3p				0	#N/A	#N/A	#N/A	#N/A	#N/A	0	#N/A	#N/A	0	0	#N/A	#N/A	0	0	#N/A	#N/A	0	0	#N/A	#N/A	0	0	#N/A	#N/A	0	0	#N/A	#N/A	0
hsa-miR-6756-3p				0	#N/A	#N/A	#N/A	#N/A	#N/A	0	#N/A	#N/A	0	0	#N/A	#N/A	0	0	#N/A	#N/A	0	0	#N/A	#N/A	0	0	#N/A	#N/A	0	0	#N/A	#N/A	0
hsa-miR-3127-3p				0	#N/A	#N/A	#N/A	#N/A	#N/A	0	#N/A	#N/A	0	0	#N/A	#N/A	0	0	#N/A	#N/A	0	0	#N/A	#N/A	0	0	#N/A	#N/A	0	0	#N/A	#N/A	0
hsa-miR-3162-3p				0	#N/A	#N/A	#N/A	#N/A	#N/A	0	#N/A	#N/A	0	0	#N/A	#N/A	0	0	#N/A	#N/A	0	0	#N/A	#N/A	0	0	#N/A	#N/A	0	0	#N/A	#N/A	0
hsa-miR-4667-3p				0	#N/A	#N/A	#N/A	#N/A	#N/A	0	#N/A	#N/A	0	0	#N/A	#N/A	0	0	#N/A	#N/A	0	0	#N/A	#N/A	0	0	#N/A	#N/A	0	0	#N/A	#N/A	0
hsa-miR-6803-3p				0.333333	-5.81223	-2.53909	0.373209	#N/A	1	0	#N/A	#N/A	0	0	#N/A	#N/A	0	1	#N/A	#N/A	35.6651	0	#N/A	#N/A	0	0	#N/A	#N/A	0	0	#N/A	#N/A	0
hsa-miR-6892-3p				0	#N/A	#N/A	#N/A	#N/A	#N/A	0	#N/A	#N/A	0	0	#N/A	#N/A	0	0	#N/A	#N/A	0	0	#N/A	#N/A	0	0	#N/A	#N/A	0	0	#N/A	#N/A	0
hsa-miR-125b-5p				87.3333	2.277	1.18713	0.58005	0.898142	1	244	#N/A	#N/A	6819.73	1	#N/A	#N/A	511.083	7	#N/A	#N/A	249.656	190	#N/A	#N/A	7938.13	0	#N/A	#N/A	0	72	#N/A	#N/A	9738.86
hsa-miR-125a-5p				3.33333	4.97099	2.31353	0.255859	0.651646	1	2	#N/A	#N/A	55.8994	0	#N/A	#N/A	0	0	#N/A	#N/A	0	9	#N/A	#N/A	376.016	0	#N/A	#N/A	0	1	#N/A	#N/A	135.262
hsa-miR-4319				0	#N/A	#N/A	#N/A	#N/A	#N/A	0	#N/A	#N/A	0	0	#N/A	#N/A	0	0	#N/A	#N/A	0	0	#N/A	#N/A	0	0	#N/A	#N/A	0	0	#N/A	#N/A	0
hsa-miR-6752-3p				0	#N/A	#N/A	#N/A	#N/A	#N/A	0	#N/A	#N/A	0	0	#N/A	#N/A	0	0	#N/A	#N/A	0	0	#N/A	#N/A	0	0	#N/A	#N/A	0	0	#N/A	#N/A	0
hsa-miR-4308				0	#N/A	#N/A	#N/A	#N/A	#N/A	0	#N/A	#N/A	0	0	#N/A	#N/A	0	0	#N/A	#N/A	0	0	#N/A	#N/A	0	0	#N/A	#N/A	0	0	#N/A	#N/A	0
hsa-miR-339-5p				0	#N/A	#N/A	#N/A	#N/A	#N/A	0	#N/A	#N/A	0	0	#N/A	#N/A	0	0	#N/A	#N/A	0	0	#N/A	#N/A	0	0	#N/A	#N/A	0	0	#N/A	#N/A	0
hsa-miR-5088-3p				0	#N/A	#N/A	#N/A	#N/A	#N/A	0	#N/A	#N/A	0	0	#N/A	#N/A	0	0	#N/A	#N/A	0	0	#N/A	#N/A	0	0	#N/A	#N/A	0	0	#N/A	#N/A	0
hsa-miR-6780b-3p				0	#N/A	#N/A	#N/A	#N/A	#N/A	0	#N/A	#N/A	0	0	#N/A	#N/A	0	0	#N/A	#N/A	0	0	#N/A	#N/A	0	0	#N/A	#N/A	0	0	#N/A	#N/A	0
hsa-miR-6716-3p				0	#N/A	#N/A	#N/A	#N/A	#N/A	0	#N/A	#N/A	0	0	#N/A	#N/A	0	0	#N/A	#N/A	0	0	#N/A	#N/A	0	0	#N/A	#N/A	0	0	#N/A	#N/A	0
hsa-miR-615-3p				0	#N/A	#N/A	#N/A	#N/A	#N/A	0	#N/A	#N/A	0	0	#N/A	#N/A	0	0	#N/A	#N/A	0	0	#N/A	#N/A	0	0	#N/A	#N/A	0	0	#N/A	#N/A	0
hsa-miR-671-3p				30.3333	-237.506	-7.89182	0.0299313	0.343683	1	91	#N/A	#N/A	2543.42	0	#N/A	#N/A	0	0	#N/A	#N/A	0	0	#N/A	#N/A	0	0	#N/A	#N/A	0	0	#N/A	#N/A	0
hsa-miR-3678-5p				0	#N/A	#N/A	#N/A	#N/A	#N/A	0	#N/A	#N/A	0	0	#N/A	#N/A	0	0	#N/A	#N/A	0	0	#N/A	#N/A	0	0	#N/A	#N/A	0	0	#N/A	#N/A	0
hsa-miR-340-3p				0	#N/A	#N/A	#N/A	#N/A	#N/A	0	#N/A	#N/A	0	0	#N/A	#N/A	0	0	#N/A	#N/A	0	0	#N/A	#N/A	0	0	#N/A	#N/A	0	0	#N/A	#N/A	0
hsa-miR-5009-3p				0	#N/A	#N/A	#N/A	#N/A	#N/A	0	#N/A	#N/A	0	0	#N/A	#N/A	0	0	#N/A	#N/A	0	0	#N/A	#N/A	0	0	#N/A	#N/A	0	0	#N/A	#N/A	0
hsa-miR-6761-3p				0	#N/A	#N/A	#N/A	#N/A	#N/A	0	#N/A	#N/A	0	0	#N/A	#N/A	0	0	#N/A	#N/A	0	0	#N/A	#N/A	0	0	#N/A	#N/A	0	0	#N/A	#N/A	0
hsa-miR-6072				0	#N/A	#N/A	#N/A	#N/A	#N/A	0	#N/A	#N/A	0	0	#N/A	#N/A	0	0	#N/A	#N/A	0	0	#N/A	#N/A	0	0	#N/A	#N/A	0	0	#N/A	#N/A	0
hsa-miR-5193				0	#N/A	#N/A	#N/A	#N/A	#N/A	0	#N/A	#N/A	0	0	#N/A	#N/A	0	0	#N/A	#N/A	0	0	#N/A	#N/A	0	0	#N/A	#N/A	0	0	#N/A	#N/A	0
hsa-miR-877-3p				0	#N/A	#N/A	#N/A	#N/A	#N/A	0	#N/A	#N/A	0	0	#N/A	#N/A	0	0	#N/A	#N/A	0	0	#N/A	#N/A	0	0	#N/A	#N/A	0	0	#N/A	#N/A	0
hsa-miR-6727-3p				0	#N/A	#N/A	#N/A	#N/A	#N/A	0	#N/A	#N/A	0	0	#N/A	#N/A	0	0	#N/A	#N/A	0	0	#N/A	#N/A	0	0	#N/A	#N/A	0	0	#N/A	#N/A	0
hsa-miR-6747-3p				0	#N/A	#N/A	#N/A	#N/A	#N/A	0	#N/A	#N/A	0	0	#N/A	#N/A	0	0	#N/A	#N/A	0	0	#N/A	#N/A	0	0	#N/A	#N/A	0	0	#N/A	#N/A	0
hsa-miR-1539				0	#N/A	#N/A	#N/A	#N/A	#N/A	0	#N/A	#N/A	0	0	#N/A	#N/A	0	0	#N/A	#N/A	0	0	#N/A	#N/A	0	0	#N/A	#N/A	0	0	#N/A	#N/A	0
hsa-miR-3193				0	#N/A	#N/A	#N/A	#N/A	#N/A	0	#N/A	#N/A	0	0	#N/A	#N/A	0	0	#N/A	#N/A	0	0	#N/A	#N/A	0	0	#N/A	#N/A	0	0	#N/A	#N/A	0
hsa-miR-486-5p				1.33333	-1.99282	-0.994808	0.652563	0.958868	1	2	#N/A	#N/A	55.8994	2	#N/A	#N/A	1022.17	0	#N/A	#N/A	0	0	#N/A	#N/A	0	1	#N/A	#N/A	19.4098	3	#N/A	#N/A	405.786
hsa-miR-6748-3p				0	#N/A	#N/A	#N/A	#N/A	#N/A	0	#N/A	#N/A	0	0	#N/A	#N/A	0	0	#N/A	#N/A	0	0	#N/A	#N/A	0	0	#N/A	#N/A	0	0	#N/A	#N/A	0
hsa-miR-5699-3p				0	#N/A	#N/A	#N/A	#N/A	#N/A	0	#N/A	#N/A	0	0	#N/A	#N/A	0	0	#N/A	#N/A	0	0	#N/A	#N/A	0	0	#N/A	#N/A	0	0	#N/A	#N/A	0
hsa-miR-205-5p				0.333333	2.37647	1.24882	0.624194	#N/A	1	0	#N/A	#N/A	0	0	#N/A	#N/A	0	0	#N/A	#N/A	0	1	#N/A	#N/A	41.7796	0	#N/A	#N/A	0	0	#N/A	#N/A	0
hsa-miR-1237-3p				0	#N/A	#N/A	#N/A	#N/A	#N/A	0	#N/A	#N/A	0	0	#N/A	#N/A	0	0	#N/A	#N/A	0	0	#N/A	#N/A	0	0	#N/A	#N/A	0	0	#N/A	#N/A	0
hsa-miR-10397-5p				0	#N/A	#N/A	#N/A	#N/A	#N/A	0	#N/A	#N/A	0	0	#N/A	#N/A	0	0	#N/A	#N/A	0	0	#N/A	#N/A	0	0	#N/A	#N/A	0	0	#N/A	#N/A	0
hsa-miR-3121-5p				0	#N/A	#N/A	#N/A	#N/A	#N/A	0	#N/A	#N/A	0	0	#N/A	#N/A	0	0	#N/A	#N/A	0	0	#N/A	#N/A	0	0	#N/A	#N/A	0	0	#N/A	#N/A	0
hsa-miR-196b-3p				0	#N/A	#N/A	#N/A	#N/A	#N/A	0	#N/A	#N/A	0	0	#N/A	#N/A	0	0	#N/A	#N/A	0	0	#N/A	#N/A	0	0	#N/A	#N/A	0	0	#N/A	#N/A	0
hsa-miR-1307-5p				0	#N/A	#N/A	#N/A	#N/A	#N/A	0	#N/A	#N/A	0	0	#N/A	#N/A	0	0	#N/A	#N/A	0	0	#N/A	#N/A	0	0	#N/A	#N/A	0	0	#N/A	#N/A	0
hsa-miR-3131				0	#N/A	#N/A	#N/A	#N/A	#N/A	0	#N/A	#N/A	0	0	#N/A	#N/A	0	0	#N/A	#N/A	0	0	#N/A	#N/A	0	0	#N/A	#N/A	0	0	#N/A	#N/A	0
hsa-miR-151b				0	#N/A	#N/A	#N/A	#N/A	#N/A	0	#N/A	#N/A	0	0	#N/A	#N/A	0	0	#N/A	#N/A	0	0	#N/A	#N/A	0	0	#N/A	#N/A	0	0	#N/A	#N/A	0
hsa-miR-151a-5p				86	-1.07385	-0.102797	0.964139	0.982521	1	90	#N/A	#N/A	2515.47	0	#N/A	#N/A	0	123	#N/A	#N/A	4386.81	72	#N/A	#N/A	3008.13	186	#N/A	#N/A	3610.23	0	#N/A	#N/A	0
hsa-miR-6767-5p				0	#N/A	#N/A	#N/A	#N/A	#N/A	0	#N/A	#N/A	0	0	#N/A	#N/A	0	0	#N/A	#N/A	0	0	#N/A	#N/A	0	0	#N/A	#N/A	0	0	#N/A	#N/A	0
hsa-miR-1281				0	#N/A	#N/A	#N/A	#N/A	#N/A	0	#N/A	#N/A	0	0	#N/A	#N/A	0	0	#N/A	#N/A	0	0	#N/A	#N/A	0	0	#N/A	#N/A	0	0	#N/A	#N/A	0
hsa-miR-1292-3p				0	#N/A	#N/A	#N/A	#N/A	#N/A	0	#N/A	#N/A	0	0	#N/A	#N/A	0	0	#N/A	#N/A	0	0	#N/A	#N/A	0	0	#N/A	#N/A	0	0	#N/A	#N/A	0
hsa-miR-579-5p				0	#N/A	#N/A	#N/A	#N/A	#N/A	0	#N/A	#N/A	0	0	#N/A	#N/A	0	0	#N/A	#N/A	0	0	#N/A	#N/A	0	0	#N/A	#N/A	0	0	#N/A	#N/A	0
hsa-miR-127-3p				2715	-6.64272	-2.73177	0.0116361	0.343683	1	4695	#N/A	#N/A	131224	528	#N/A	#N/A	269852	2922	#N/A	#N/A	104213	1471	#N/A	#N/A	61457.8	654	#N/A	#N/A	12694	13	#N/A	#N/A	1758.41
hsa-miR-1234-3p				0	#N/A	#N/A	#N/A	#N/A	#N/A	0	#N/A	#N/A	0	0	#N/A	#N/A	0	0	#N/A	#N/A	0	0	#N/A	#N/A	0	0	#N/A	#N/A	0	0	#N/A	#N/A	0
hsa-miR-7107-5p				0	#N/A	#N/A	#N/A	#N/A	#N/A	0	#N/A	#N/A	0	0	#N/A	#N/A	0	0	#N/A	#N/A	0	0	#N/A	#N/A	0	0	#N/A	#N/A	0	0	#N/A	#N/A	0
hsa-miR-6741-3p				0	#N/A	#N/A	#N/A	#N/A	#N/A	0	#N/A	#N/A	0	0	#N/A	#N/A	0	0	#N/A	#N/A	0	0	#N/A	#N/A	0	0	#N/A	#N/A	0	0	#N/A	#N/A	0
hsa-miR-11400				0	#N/A	#N/A	#N/A	#N/A	#N/A	0	#N/A	#N/A	0	0	#N/A	#N/A	0	0	#N/A	#N/A	0	0	#N/A	#N/A	0	0	#N/A	#N/A	0	0	#N/A	#N/A	0
hsa-miR-6749-5p				0	#N/A	#N/A	#N/A	#N/A	#N/A	0	#N/A	#N/A	0	0	#N/A	#N/A	0	0	#N/A	#N/A	0	0	#N/A	#N/A	0	0	#N/A	#N/A	0	0	#N/A	#N/A	0
hsa-miR-6499-5p				0	#N/A	#N/A	#N/A	#N/A	#N/A	0	#N/A	#N/A	0	0	#N/A	#N/A	0	0	#N/A	#N/A	0	0	#N/A	#N/A	0	0	#N/A	#N/A	0	0	#N/A	#N/A	0
hsa-miR-6889-5p				0	#N/A	#N/A	#N/A	#N/A	#N/A	0	#N/A	#N/A	0	0	#N/A	#N/A	0	0	#N/A	#N/A	0	0	#N/A	#N/A	0	0	#N/A	#N/A	0	0	#N/A	#N/A	0
hsa-miR-542-5p				0	#N/A	#N/A	#N/A	#N/A	#N/A	0	#N/A	#N/A	0	0	#N/A	#N/A	0	0	#N/A	#N/A	0	0	#N/A	#N/A	0	0	#N/A	#N/A	0	0	#N/A	#N/A	0
hsa-miR-6775-5p				0	#N/A	#N/A	#N/A	#N/A	#N/A	0	#N/A	#N/A	0	0	#N/A	#N/A	0	0	#N/A	#N/A	0	0	#N/A	#N/A	0	0	#N/A	#N/A	0	0	#N/A	#N/A	0
hsa-miR-101-2-5p				0	#N/A	#N/A	#N/A	#N/A	#N/A	0	#N/A	#N/A	0	0	#N/A	#N/A	0	0	#N/A	#N/A	0	0	#N/A	#N/A	0	0	#N/A	#N/A	0	0	#N/A	#N/A	0
hsa-miR-126-3p				206	1.29265	0.370337	0.858336	0.96669	1	600	#N/A	#N/A	16769.8	14	#N/A	#N/A	7155.16	4	#N/A	#N/A	142.66	438	#N/A	#N/A	18299.5	2	#N/A	#N/A	38.8197	95	#N/A	#N/A	12849.9
hsa-miR-6506-3p				0	#N/A	#N/A	#N/A	#N/A	#N/A	0	#N/A	#N/A	0	0	#N/A	#N/A	0	0	#N/A	#N/A	0	0	#N/A	#N/A	0	0	#N/A	#N/A	0	0	#N/A	#N/A	0
hsa-miR-4536-3p				0	#N/A	#N/A	#N/A	#N/A	#N/A	0	#N/A	#N/A	0	0	#N/A	#N/A	0	0	#N/A	#N/A	0	0	#N/A	#N/A	0	0	#N/A	#N/A	0	0	#N/A	#N/A	0
hsa-miR-1204				0	#N/A	#N/A	#N/A	#N/A	#N/A	0	#N/A	#N/A	0	0	#N/A	#N/A	0	0	#N/A	#N/A	0	0	#N/A	#N/A	0	0	#N/A	#N/A	0	0	#N/A	#N/A	0
hsa-miR-6774-3p				0	#N/A	#N/A	#N/A	#N/A	#N/A	0	#N/A	#N/A	0	0	#N/A	#N/A	0	0	#N/A	#N/A	0	0	#N/A	#N/A	0	0	#N/A	#N/A	0	0	#N/A	#N/A	0
hsa-miR-187-3p				0	#N/A	#N/A	#N/A	#N/A	#N/A	0	#N/A	#N/A	0	0	#N/A	#N/A	0	0	#N/A	#N/A	0	0	#N/A	#N/A	0	0	#N/A	#N/A	0	0	#N/A	#N/A	0
hsa-miR-1282				0	#N/A	#N/A	#N/A	#N/A	#N/A	0	#N/A	#N/A	0	0	#N/A	#N/A	0	0	#N/A	#N/A	0	0	#N/A	#N/A	0	0	#N/A	#N/A	0	0	#N/A	#N/A	0
hsa-miR-4744				0	#N/A	#N/A	#N/A	#N/A	#N/A	0	#N/A	#N/A	0	0	#N/A	#N/A	0	0	#N/A	#N/A	0	0	#N/A	#N/A	0	0	#N/A	#N/A	0	0	#N/A	#N/A	0
hsa-miR-1283				0	#N/A	#N/A	#N/A	#N/A	#N/A	0	#N/A	#N/A	0	0	#N/A	#N/A	0	0	#N/A	#N/A	0	0	#N/A	#N/A	0	0	#N/A	#N/A	0	0	#N/A	#N/A	0
hsa-miR-139-5p				2.33333	1.11257	0.153895	0.922418	0.976678	1	3	#N/A	#N/A	83.8491	1	#N/A	#N/A	511.083	2	#N/A	#N/A	71.3302	5	#N/A	#N/A	208.898	0	#N/A	#N/A	0	2	#N/A	#N/A	270.524
hsa-miR-6508-5p				0	#N/A	#N/A	#N/A	#N/A	#N/A	0	#N/A	#N/A	0	0	#N/A	#N/A	0	0	#N/A	#N/A	0	0	#N/A	#N/A	0	0	#N/A	#N/A	0	0	#N/A	#N/A	0
hsa-miR-520g-5p				0	#N/A	#N/A	#N/A	#N/A	#N/A	0	#N/A	#N/A	0	0	#N/A	#N/A	0	0	#N/A	#N/A	0	0	#N/A	#N/A	0	0	#N/A	#N/A	0	0	#N/A	#N/A	0
hsa-miR-645				0	#N/A	#N/A	#N/A	#N/A	#N/A	0	#N/A	#N/A	0	0	#N/A	#N/A	0	0	#N/A	#N/A	0	0	#N/A	#N/A	0	0	#N/A	#N/A	0	0	#N/A	#N/A	0
[truncated: 633 more rows]

## Sheet: TNF-lung-IsoMirs
Name	Chromosome	Region	Identifier	study vs. control - Max group means	study vs. control - Fold change	study vs. control - Log fold change	study vs. control - P-value	study vs. control - FDR p-value	study vs. control - Bonferroni	49003001_1 (grouped on seed) - Total counts	49003001_1 (grouped on seed) - RPKM	49003001_1 (grouped on seed) - TPM	49003001_1 (grouped on seed) - CPM	49003005_1 (grouped on seed) - Total counts	49003005_1 (grouped on seed) - RPKM	49003005_1 (grouped on seed) - TPM	49003005_1 (grouped on seed) - CPM	49003003_1 (grouped on seed) - Total counts	49003003_1 (grouped on seed) - RPKM	49003003_1 (grouped on seed) - TPM	49003003_1 (grouped on seed) - CPM	49003002_1 (grouped on seed) - Total counts	49003002_1 (grouped on seed) - RPKM	49003002_1 (grouped on seed) - TPM	49003002_1 (grouped on seed) - CPM	49003004_1 (grouped on seed) - Total counts	49003004_1 (grouped on seed) - RPKM	49003004_1 (grouped on seed) - TPM	49003004_1 (grouped on seed) - CPM	49003006_1 (grouped on seed) - Total counts	49003006_1 (grouped on seed) - RPKM	49003006_1 (grouped on seed) - TPM	49003006_1 (grouped on seed) - CPM
hsa-miR-548ac				406.667	-1.38131	-0.466036	0.654679	0.963425	1	535	#N/A	#N/A	109.252	362	#N/A	#N/A	131.332	323	#N/A	#N/A	57.7692	175	#N/A	#N/A	41.36	217	#N/A	#N/A	64.6806	560	#N/A	#N/A	109.37
hsa-miR-548ae-3p				174.333	2.92851	1.55016	0.277339	0.890458	1	215	#N/A	#N/A	43.905	4	#N/A	#N/A	1.45118	5	#N/A	#N/A	0.89426	145	#N/A	#N/A	34.2697	271	#N/A	#N/A	80.7762	107	#N/A	#N/A	20.8974
hsa-miR-12136				494.333	2.69888	1.43236	0.213053	0.848816	1	544	#N/A	#N/A	111.09	5	#N/A	#N/A	1.81397	170	#N/A	#N/A	30.4048	354	#N/A	#N/A	83.6654	810	#N/A	#N/A	241.434	319	#N/A	#N/A	62.3016
hsa-miR-548c-3p				683.667	-3.12086	-1.64194	0.0910433	0.703439	1	757	#N/A	#N/A	154.586	753	#N/A	#N/A	273.184	541	#N/A	#N/A	96.7589	189	#N/A	#N/A	44.6688	199	#N/A	#N/A	59.3154	326	#N/A	#N/A	63.6687
hsa-miR-548aa				275.333	-1.35495	-0.438244	0.726798	0.978075	1	611	#N/A	#N/A	124.772	5	#N/A	#N/A	1.81397	210	#N/A	#N/A	37.5589	274	#N/A	#N/A	64.7579	5	#N/A	#N/A	1.49034	281	#N/A	#N/A	54.8801
hsa-miR-548as-3p				87	14.2241	3.83027	0.0087053	0.267223	1	4	#N/A	#N/A	0.816837	3	#N/A	#N/A	1.08838	10	#N/A	#N/A	1.78852	56	#N/A	#N/A	13.2352	8	#N/A	#N/A	2.38454	197	#N/A	#N/A	38.4747
hsa-miR-548at-3p				218	1.12344	0.167917	0.893341	0.99503	1	206	#N/A	#N/A	42.0671	15	#N/A	#N/A	5.44192	433	#N/A	#N/A	77.4429	72	#N/A	#N/A	17.0167	202	#N/A	#N/A	60.2096	325	#N/A	#N/A	63.4734
hsa-miR-548ad-3p				315.667	1.05898	0.0826701	0.935985	0.998209	1	463	#N/A	#N/A	94.5488	221	#N/A	#N/A	80.1776	235	#N/A	#N/A	42.0302	218	#N/A	#N/A	51.5227	346	#N/A	#N/A	103.131	383	#N/A	#N/A	74.801
hsa-miR-424-3p				188.333	3.08235	1.62403	0.252907	0.878255	1	11	#N/A	#N/A	2.2463	1	#N/A	#N/A	0.362795	246	#N/A	#N/A	43.9976	110	#N/A	#N/A	25.9977	287	#N/A	#N/A	85.5453	168	#N/A	#N/A	32.8109
hsa-miR-548a-3p				187	4.30224	2.10509	0.130113	0.793494	1	145	#N/A	#N/A	29.6103	6	#N/A	#N/A	2.17677	7	#N/A	#N/A	1.25196	216	#N/A	#N/A	51.0501	239	#N/A	#N/A	71.238	106	#N/A	#N/A	20.7021
hsa-miR-5582-3p				75	-20.2801	-4.34199	0.00808909	0.264665	1	221	#N/A	#N/A	45.1302	1	#N/A	#N/A	0.362795	3	#N/A	#N/A	0.536556	2	#N/A	#N/A	0.472686	1	#N/A	#N/A	0.298067	7	#N/A	#N/A	1.36712
hsa-miR-548e-5p				61.3333	-1.42099	-0.506898	0.739156	0.978075	1	153	#N/A	#N/A	31.244	18	#N/A	#N/A	6.5303	13	#N/A	#N/A	2.32508	37	#N/A	#N/A	8.74468	12	#N/A	#N/A	3.57681	81	#N/A	#N/A	15.8195
hsa-miR-548n				386.667	-1.97869	-0.984545	0.377428	0.909607	1	311	#N/A	#N/A	63.5091	489	#N/A	#N/A	177.407	360	#N/A	#N/A	64.3867	237	#N/A	#N/A	56.0132	186	#N/A	#N/A	55.4405	217	#N/A	#N/A	42.3807
hsa-miR-548az-5p				316.333	-1.02998	-0.0426185	0.968682	0.998209	1	491	#N/A	#N/A	100.267	19	#N/A	#N/A	6.8931	439	#N/A	#N/A	78.516	157	#N/A	#N/A	37.1058	227	#N/A	#N/A	67.6612	388	#N/A	#N/A	75.7775
hsa-miR-4668-3p				326.667	-1.31706	-0.397323	0.765329	0.982552	1	354	#N/A	#N/A	72.29	326	#N/A	#N/A	118.271	300	#N/A	#N/A	53.6556	179	#N/A	#N/A	42.3054	475	#N/A	#N/A	141.582	8	#N/A	#N/A	1.56242
hsa-miR-3662				145.333	-1.12428	-0.168998	0.911639	0.995668	1	234	#N/A	#N/A	47.7849	4	#N/A	#N/A	1.45118	198	#N/A	#N/A	35.4127	300	#N/A	#N/A	70.9028	9	#N/A	#N/A	2.6826	9	#N/A	#N/A	1.75773
hsa-miR-4282				248	1.1653	0.220699	0.868956	0.991605	1	121	#N/A	#N/A	24.7093	2	#N/A	#N/A	0.725589	621	#N/A	#N/A	111.067	66	#N/A	#N/A	15.5986	355	#N/A	#N/A	105.814	194	#N/A	#N/A	37.8888
hsa-miR-497-3p				41	13.1824	3.72054	0.0211646	0.3951	1	0	#N/A	#N/A	0	4	#N/A	#N/A	1.45118	4	#N/A	#N/A	0.715408	121	#N/A	#N/A	28.5975	0	#N/A	#N/A	0	2	#N/A	#N/A	0.390606
hsa-miR-6771-3p				94.6667	1.10319	0.141684	0.917668	0.998209	1	133	#N/A	#N/A	27.1598	8	#N/A	#N/A	2.90236	143	#N/A	#N/A	25.5758	151	#N/A	#N/A	35.6878	10	#N/A	#N/A	2.98067	117	#N/A	#N/A	22.8504
hsa-miR-1537-3p				6504.67	-2.13996	-1.09759	0.11044	0.747496	1	2926	#N/A	#N/A	597.516	11091	#N/A	#N/A	4023.75	5497	#N/A	#N/A	983.149	4457	#N/A	#N/A	1053.38	2939	#N/A	#N/A	876.019	3529	#N/A	#N/A	689.224
hsa-miR-553				554	1.73447	0.794495	0.441441	0.924088	1	429	#N/A	#N/A	87.6057	16	#N/A	#N/A	5.80471	674	#N/A	#N/A	120.546	790	#N/A	#N/A	186.711	141	#N/A	#N/A	42.0275	731	#N/A	#N/A	142.766
hsa-miR-7844-5p				259.333	-2.12582	-1.08802	0.475728	0.936716	1	8	#N/A	#N/A	1.63367	578	#N/A	#N/A	209.695	192	#N/A	#N/A	34.3396	210	#N/A	#N/A	49.632	215	#N/A	#N/A	64.0844	9	#N/A	#N/A	1.75773
hsa-miR-548av-3p				39	1.21218	0.277604	0.862292	0.991605	1	3	#N/A	#N/A	0.612628	4	#N/A	#N/A	1.45118	97	#N/A	#N/A	17.3486	3	#N/A	#N/A	0.709028	6	#N/A	#N/A	1.7884	108	#N/A	#N/A	21.0927
hsa-miR-548g-3p				399	-1.37604	-0.460523	0.651731	0.963425	1	420	#N/A	#N/A	85.7679	417	#N/A	#N/A	151.285	360	#N/A	#N/A	64.3867	406	#N/A	#N/A	95.9552	340	#N/A	#N/A	101.343	111	#N/A	#N/A	21.6786
hsa-miR-3133				230.667	-2.06353	-1.04511	0.424887	0.924088	1	394	#N/A	#N/A	80.4584	14	#N/A	#N/A	5.07912	284	#N/A	#N/A	50.794	88	#N/A	#N/A	20.7982	14	#N/A	#N/A	4.17294	210	#N/A	#N/A	41.0136
hsa-miR-186-5p				140.333	-4.41108	-2.14113	0.122881	0.782105	1	235	#N/A	#N/A	47.9892	138	#N/A	#N/A	50.0657	48	#N/A	#N/A	8.58489	88	#N/A	#N/A	20.7982	5	#N/A	#N/A	1.49034	9	#N/A	#N/A	1.75773
hsa-miR-548u				226.333	-1.56288	-0.644209	0.624763	0.963425	1	84	#N/A	#N/A	17.1536	478	#N/A	#N/A	173.416	117	#N/A	#N/A	20.9257	389	#N/A	#N/A	91.9374	89	#N/A	#N/A	26.528	85	#N/A	#N/A	16.6007
hsa-miR-4311				315.667	3.54441	1.82554	0.176899	0.815021	1	170	#N/A	#N/A	34.7156	0	#N/A	#N/A	0	187	#N/A	#N/A	33.4453	372	#N/A	#N/A	87.9195	410	#N/A	#N/A	122.208	165	#N/A	#N/A	32.225
hsa-miR-1276				64.3333	1.97044	0.978518	0.539312	0.949461	1	90	#N/A	#N/A	18.3788	6	#N/A	#N/A	2.17677	6	#N/A	#N/A	1.07311	112	#N/A	#N/A	26.4704	5	#N/A	#N/A	1.49034	76	#N/A	#N/A	14.843
hsa-miR-583				417	1.22559	0.293478	0.818146	0.988786	1	700	#N/A	#N/A	142.946	3	#N/A	#N/A	1.08838	548	#N/A	#N/A	98.0109	334	#N/A	#N/A	78.9385	684	#N/A	#N/A	203.878	72	#N/A	#N/A	14.0618
hsa-miR-6835-3p				323	-4.43339	-2.14841	0.102365	0.723662	1	248	#N/A	#N/A	50.6439	436	#N/A	#N/A	158.178	285	#N/A	#N/A	50.9728	153	#N/A	#N/A	36.1605	7	#N/A	#N/A	2.08647	103	#N/A	#N/A	20.1162
hsa-miR-4422				1500.33	-1.18411	-0.243808	0.711814	0.972937	1	2000	#N/A	#N/A	408.418	1266	#N/A	#N/A	459.298	1235	#N/A	#N/A	220.882	2229	#N/A	#N/A	526.808	587	#N/A	#N/A	174.965	1112	#N/A	#N/A	217.177
hsa-miR-518a-3p				672.333	-1.01964	-0.0280646	0.979198	0.998209	1	481	#N/A	#N/A	98.2246	795	#N/A	#N/A	288.422	741	#N/A	#N/A	132.529	372	#N/A	#N/A	87.9195	1334	#N/A	#N/A	397.621	121	#N/A	#N/A	23.6316
hsa-miR-320a-3p				160	-2.1651	-1.11444	0.405307	0.924088	1	203	#N/A	#N/A	41.4545	124	#N/A	#N/A	44.9865	153	#N/A	#N/A	27.3644	109	#N/A	#N/A	25.7614	14	#N/A	#N/A	4.17294	114	#N/A	#N/A	22.2645
hsa-miR-548an				12.3333	-4.02456	-2.00883	0.0865684	0.690618	1	3	#N/A	#N/A	0.612628	12	#N/A	#N/A	4.35354	22	#N/A	#N/A	3.93474	2	#N/A	#N/A	0.472686	2	#N/A	#N/A	0.596134	5	#N/A	#N/A	0.976514
hsa-miR-6768-3p				1567	-1.99651	-0.997483	0.177585	0.815021	1	894	#N/A	#N/A	182.563	2606	#N/A	#N/A	945.443	1201	#N/A	#N/A	214.801	1133	#N/A	#N/A	267.776	802	#N/A	#N/A	239.05	847	#N/A	#N/A	165.422
hsa-miR-4484				555.333	1.39963	0.485041	0.63075	0.963425	1	567	#N/A	#N/A	115.787	366	#N/A	#N/A	132.783	370	#N/A	#N/A	66.1752	601	#N/A	#N/A	142.042	881	#N/A	#N/A	262.597	184	#N/A	#N/A	35.9357
hsa-miR-10526-3p				312.667	1.87512	0.906982	0.431037	0.924088	1	62	#N/A	#N/A	12.661	122	#N/A	#N/A	44.2609	321	#N/A	#N/A	57.4115	325	#N/A	#N/A	76.8114	172	#N/A	#N/A	51.2675	441	#N/A	#N/A	86.1286
hsa-miR-548m				187	2.73801	1.45313	0.341814	0.909607	1	212	#N/A	#N/A	43.2923	3	#N/A	#N/A	1.08838	2	#N/A	#N/A	0.357704	307	#N/A	#N/A	72.5572	6	#N/A	#N/A	1.7884	248	#N/A	#N/A	48.4351
hsa-miR-12135				1398.67	1.02507	0.035727	0.956744	0.998209	1	1846	#N/A	#N/A	376.97	725	#N/A	#N/A	263.026	1625	#N/A	#N/A	290.634	996	#N/A	#N/A	235.397	980	#N/A	#N/A	292.106	2184	#N/A	#N/A	426.541
hsa-miR-548a-5p				401.667	1.05727	0.0803463	0.939401	0.998209	1	341	#N/A	#N/A	69.6353	368	#N/A	#N/A	133.508	496	#N/A	#N/A	88.7106	301	#N/A	#N/A	71.1392	730	#N/A	#N/A	217.589	102	#N/A	#N/A	19.9209
hsa-miR-548av-5p				281	41.6156	5.37905	5.68273e-05	0.0237993	0.118996	7	#N/A	#N/A	1.42946	5	#N/A	#N/A	1.81397	8	#N/A	#N/A	1.43082	206	#N/A	#N/A	48.6866	189	#N/A	#N/A	56.3347	448	#N/A	#N/A	87.4957
hsa-miR-548l				161.333	3.03696	1.60263	0.234475	0.86815	1	152	#N/A	#N/A	31.0398	13	#N/A	#N/A	4.71633	26	#N/A	#N/A	4.65015	151	#N/A	#N/A	35.6878	222	#N/A	#N/A	66.1709	111	#N/A	#N/A	21.6786
hsa-miR-6507-3p				469.667	2.02701	1.01935	0.355874	0.909607	1	173	#N/A	#N/A	35.3282	31	#N/A	#N/A	11.2466	720	#N/A	#N/A	128.773	401	#N/A	#N/A	94.7735	629	#N/A	#N/A	187.484	379	#N/A	#N/A	74.0198
hsa-miR-3609				641	-2.10529	-1.07402	0.354705	0.909607	1	675	#N/A	#N/A	137.841	11	#N/A	#N/A	3.99074	1237	#N/A	#N/A	221.24	545	#N/A	#N/A	128.807	12	#N/A	#N/A	3.57681	205	#N/A	#N/A	40.0371
[truncated: 2,049 more rows]

## Sheet: TNF-Brain-mature
Name	Prim-brain-Evs-resting#1	Prim-brain-Evs-resting#2	Prim-brain-Evs-resting#3	Prim-brain-Evs-tnf#1	Prim-brain-Evs-tnf#2	Prim-brain-Evs-tnf#3	Fold Change	Log fold change	P-value	FDR p-value
[truncated: 2,632 more rows]

[truncated: 1 more sheets: TNF-Brain-IsomMirs]
