# Supplementary material for: Distinct brain and lung endothelial miRNA/mRNA profiles after exposure to Plasmodium falciparum-infected red blood cells
Source: iScience. 2024 Oct 28;27(11):111265. doi: 10.1016/j.isci.2024.111265 (PMC11576406; doi:10.1016/j.isci.2024.111265)
Supplement: Table S4. miRNA profiles of HBMEC1.5 and HBMECstatic [file mmc5.xlsx]

## Sheet: mature- miRNA
Name	HBMEC-static-1	HBMEC-static-2	HBMEC-static-3	HBMEC-flow-1	HBMEC-flow-2	HBMEC-flow-3	Fold change	Log fold change	P-value	FDR p-value
hsa-miR-127-3p	50.5495	68.2606	202.268	86870.7	95006.9	79301.1	813.447	9.6679	3.40641e-83	2.91929e-80
hsa-miR-382-5p	0.612969	0.62913	1.10392	1243.4	844.705	559.71	1124.29	10.1348	2.33363e-48	9.9996e-46
hsa-miR-409-3p	1.22594	2.14953	3.06086	1633.14	1172.89	741.432	552.115	9.10883	4.1395e-38	1.18252e-35
hsa-miR-431-5p	0.163459	0.366992	0.200712	507.913	466.237	416.926	1904.58	10.8953	8.51981e-34	1.82537e-31
hsa-miR-411-5p	6.86526	12.4253	22.7306	5331.77	18903.6	16219.8	962.68	9.91091	9.20201e-29	1.57723e-26
hsa-miR-369-5p	4.53597	6.97285	16.6591	5529.47	12094.5	9054.24	947.148	9.88745	4.41716e-26	6.30917e-24
hsa-miR-485-5p	0.245188	0.524275	0.50178	854.972	279.877	338.328	1154.26	10.1727	4.35285e-25	5.32913e-23
hsa-miR-487b-3p	0.367782	0.314565	0.853027	218.148	741.557	702.54	1072.55	10.0668	4.2305e-24	4.02838e-22
hsa-miR-411-3p	0.122594	0.104855	0.551958	72.3706	210.594	150.87	548.861	9.1003	4.12891e-24	4.02838e-22
hsa-miR-376c-3p	0.245188	0.524275	0.802849	150.961	730.735	750.33	1032.72	10.0122	1.18451e-23	1.01513e-21
hsa-miR-654-5p	0.0817293	0.20971	0.401424	512.154	228.251	211.083	1365.11	10.4148	1.89351e-23	1.47522e-21
hsa-miR-625-5p	0.122594	0.0524275	0.25089	147.003	114.436	141.023	902.185	9.81728	3.10881e-23	2.22021e-21
hsa-miR-214-3p	0.204323	0.157282	0.401424	117.696	140.845	146.534	522.3	9.02874	9.256e-23	6.10184e-21
hsa-miR-134-5p	0.0408646	0.0524275	0.301068	55.6914	98.643	40.2471	481.503	8.9114	4.63981e-20	2.84023e-18
hsa-miR-493-3p	0	0	0.100356	71.5225	78.5001	82.1203	2031.2	10.9881	5.95598e-20	3.40285e-18
hsa-miR-432-5p	0.0408646	0.104855	1.25445	785.051	395.97	215.645	988.182	9.94863	7.82136e-20	4.18932e-18
hsa-miR-376a-3p	0.204323	0.262137	1.45516	173.953	606.46	553.748	690.483	9.43146	1.33405e-19	6.72516e-18
hsa-miR-376b-3p	0.122594	0.262137	1.40498	129.758	407.362	597.879	630.358	9.30003	5.78179e-19	2.75278e-17
hsa-miR-654-3p	0.163459	0.157282	1.35481	176.592	386.856	342.304	537.184	9.06927	1.09205e-18	4.92571e-17
hsa-miR-154-5p	0.122594	0.104855	0.351246	124.01	214.84	132.215	798.286	9.64076	2.11053e-18	9.0436e-17
hsa-miR-379-3p	0.490376	0	0.200712	61.7223	231.047	176.03	640.175	9.32232	2.89891e-18	1.14652e-16
hsa-miR-197-3p	0.490376	0.891267	1.35481	680.547	224.989	225.853	412.715	8.689	2.94323e-18	1.14652e-16
hsa-miR-323b-3p	0.0817293	0	0.301068	125.8	177.609	161.53	1166.77	10.1883	3.23594e-18	1.20574e-16
hsa-miR-34b-3p	1895.42	1357.19	1715.74	3.67507	2.89974	4.4719	-447.026	-8.80422	3.57998e-18	1.27835e-16
hsa-miR-889-3p	0.204323	0.157282	0.401424	20.3542	218.62	277.935	660.841	9.36816	3.94465e-18	1.30022e-16
hsa-miR-323a-3p	0.163459	0	1.35481	219.185	372.151	308.516	586.487	9.19595	3.87063e-18	1.30022e-16
hsa-miR-150-5p	1452.62	923.877	816.798	8.00977	13.3077	30.3095	-61.6472	-5.94596	5.08003e-18	1.61244e-16
hsa-miR-335-3p	69.1021	220.51	234.231	0.0942325	0.207124	1.12927	-345.003	-8.43046	1.00313e-17	3.07028e-16
hsa-miR-369-3p	0.0408646	0.0524275	0.100356	17.8099	66.694	90.6124	830.176	9.69727	7.30496e-17	2.15874e-15
hsa-miR-1307-3p	0.163459	0.104855	3.01068	754.708	501.189	318.273	477.96	8.90075	8.8655e-17	2.53258e-15
hsa-miR-337-5p	0.0817293	0	0.652314	39.0123	197.493	414.667	866.682	9.75936	1.1393e-16	3.14961e-15
hsa-miR-381-3p	0.0817293	0.0524275	0.551958	47.399	168.081	192.066	582.413	9.1859	1.68461e-16	4.5116e-15
hsa-miR-505-3p	0.0817293	0.0524275	0.50178	108.744	103.51	111.436	509.844	8.99391	5.21693e-16	1.35482e-14
hsa-miR-487a-5p	0.122594	0.157282	0.150534	141.632	76.636	65.7234	634.802	9.31016	5.83758e-16	1.47141e-14
hsa-miR-99a-5p	7.43736	9.06995	4.46585	652.843	1950.65	1603.88	200.421	7.64689	6.80916e-15	1.66727e-13
hsa-miR-379-5p	0.449511	3.40779	2.25801	1682.71	3861.42	2847.02	1373.65	10.4238	7.65599e-15	1.82255e-13
hsa-miR-3152-5p	0.0408646	0	0.100356	28.2698	52.8685	59.1284	866.399	9.75889	9.2457e-15	2.08515e-13
hsa-miR-1185-5p	0	0.0524275	0.25089	15.5484	70.2669	65.6782	482.007	8.91291	9.04775e-15	2.08515e-13
hsa-miR-370-3p	0.163459	0.20971	1.10392	79.3438	153.686	267.139	336.396	8.39402	1.5833e-14	3.47919e-13
hsa-miR-455-3p	0.286052	0.524275	2.55908	225.027	364.798	285.072	259.184	8.01783	1.95077e-14	4.17952e-13
hsa-miR-10401-3p	0	0.0524275	0.150534	204.579	23.5086	15.4484	1115.37	10.1233	2.67464e-14	5.59065e-13
hsa-miR-187-3p	81.0754	81.9966	88.4137	0.471163	1.81234	1.35512	-62.1221	-5.95703	4.45303e-14	9.08631e-13
hsa-miR-433-3p	0	0	0.100356	76.3284	31.8971	19.6041	1098.56	10.1014	8.1292e-14	1.62017e-12
hsa-miR-410-3p	0.0817293	0	0.802849	41.1796	139.188	174.811	394.406	8.62354	2.38335e-13	4.64212e-12
hsa-miR-584-5p	0	0	0.150534	66.7166	29.6188	21.9981	719.06	9.48997	2.50209e-13	4.76509e-12
hsa-miR-3613-5p	0.0408646	0.104855	0.802849	32.6045	79.8982	58.8574	178.88	7.48285	6.57914e-13	1.22572e-11
hsa-miR-337-3p	1.9615	2.0971	8.93169	1666.13	3381.05	3045.23	622.612	9.28219	7.91459e-13	1.44315e-11
hsa-miR-335-5p	65.506	161.529	70.8012	0	0.880278	1.0841	-143.722	-7.16713	1.34695e-12	2.40487e-11
hsa-miR-493-5p	0.0408646	0	0.100356	23.2754	46.1887	50.9074	743.607	9.5384	2.61016e-12	4.47381e-11
hsa-miR-485-3p	0.0817293	0.104855	1.6057	219.468	115.368	99.6014	240.648	7.91078	2.56131e-12	4.47381e-11
hsa-miR-424-3p	0.0817293	0	0.25089	15.8311	48.1046	28.0962	261.586	8.03114	2.78757e-12	4.68421e-11
hsa-miR-6756-3p	0	0.0524275	0.050178	34.3949	17.9163	19.9654	624.424	9.28638	4.12778e-12	6.8029e-11
hsa-miR-660-5p	0.0408646	0	1.40498	43.2527	90.9276	83.9271	149.231	7.2214	6.46296e-12	1.04505e-10
hsa-miR-543	0	0	0.100356	32.0391	22.939	19.6944	646.25	9.33595	6.89125e-12	1.09367e-10
hsa-miR-766-3p	0	0	0.100356	32.1333	15.6897	30.2644	676.261	9.40144	1.03298e-11	1.60957e-10
hsa-miR-625-3p	0	0	0.200712	7.8213	22.3694	48.423	364.971	8.51164	1.21196e-11	1.85474e-10
hsa-miR-136-3p	0	0.0524275	0.050178	9.42325	29.4634	32.026	611.111	9.25529	1.27089e-11	1.91079e-10
hsa-miR-495-5p	0	0	0.100356	40.7085	38.784	28.7737	939.257	9.87538	1.83596e-11	2.71279e-10
hsa-miR-3605-3p	0	0.0524275	0.150534	50.6029	16.2593	25.9731	435.129	8.7653	2.30797e-11	3.35243e-10
hsa-miR-496	0.122594	1.88739	0.351246	63.607	156.327	143.959	154.026	7.26703	2.36189e-11	3.37357e-10
hsa-miR-494-5p	0	0	0.050178	33.3583	48.9849	42.0991	1845.45	10.8498	2.56929e-11	3.60964e-10
hsa-miR-329-3p	0.0817293	0	0.100356	31.9448	29.4634	43.5445	502.798	8.97384	3.68243e-11	5.09006e-10
hsa-miR-1304-3p	0	0	0.200712	40.6142	33.1399	37.9434	530.903	9.0523	4.62371e-11	6.28971e-10
hsa-miR-136-5p	0	0	0.351246	7.06744	28.1689	49.3716	230.955	7.85147	7.36113e-11	9.85702e-10
hsa-miR-1271-5p	0	0.0524275	0	16.1138	22.7319	39.0275	1149.05	10.1662	7.64228e-11	9.92339e-10
hsa-miR-147b-3p	12.4637	23.0681	28.2502	0.0942325	0.0517811	0	-470.458	-8.87792	7.5894e-11	9.92339e-10
hsa-miR-34c-5p	20.1871	19.0312	17.8634	0.0942325	0.103562	0.135512	-157.284	-7.29723	1.03348e-10	1.32193e-09
hsa-miR-214-5p	0	0.0524275	0	28.1755	34.0202	44.99	1588.13	10.6331	1.6705e-10	2.09899e-09
hsa-miR-495-3p	0.0817293	0.157282	0.903205	14.0406	61.6713	72.4086	128.413	7.00465	1.68997e-10	2.09899e-09
hsa-miR-548k	0	0	0.301068	14.983	40.5446	42.596	313.383	8.29178	1.74037e-10	2.13071e-09
hsa-miR-377-3p	0.0408646	0	0.602136	7.72707	51.574	87.9022	223.214	7.80229	1.88438e-10	2.27453e-09
hsa-miR-539-5p	0	0	0.301068	43.5354	26.8744	21.6368	297.217	8.21537	2.0387e-10	2.42662e-09
hsa-miR-941	0	0.0524275	2.00712	144.741	132.352	106.061	184.619	7.52841	3.11699e-10	3.65926e-09
hsa-miR-664a-3p	0	0.0524275	0.050178	12.8156	16.7253	15.6291	398.455	8.63827	5.97952e-10	6.92493e-09
hsa-miR-1180-3p	0.449511	0.576702	9.28294	680.265	270.815	245.458	115.906	6.85681	8.07167e-10	9.22323e-09
hsa-miR-887-3p	0.0817293	0.104855	0.100356	5.18279	24.3889	17.5262	154.682	7.27316	8.61137e-10	9.71046e-09
hsa-miR-3135b	0	0	0.301068	55.4087	9.83841	21.5464	274.633	8.10136	9.64446e-10	1.07342e-08
hsa-miR-100-5p	585.263	762.4	1495.46	13961.7	26520.9	27387.3	23.8717	4.57723	1.09467e-09	1.20273e-08
hsa-miR-487a-3p	0	0	0.150534	10.4598	20.2982	15.9001	287.694	8.16839	1.15933e-09	1.25765e-08
hsa-miR-1226-3p	0	0	0.050178	31.7564	18.4858	5.556	817.22	9.67458	1.23723e-09	1.32539e-08
hsa-miR-130b-3p	0	0.0524275	0.25089	8.29246	25.0103	16.4421	160.1	7.32283	1.2617e-09	1.33491e-08
hsa-miR-935	4.78116	3.98449	4.41567	329.625	187.965	232.177	56.6573	5.82419	1.29739e-09	1.35593e-08
hsa-miR-323a-5p	0.122594	0	0	22.4273	10.5633	9.16965	264.015	8.04447	2.30854e-09	2.38363e-08
hsa-miR-1227-3p	0	0.0524275	0.100356	27.3274	4.97098	12.5575	270.054	8.07711	2.89145e-09	2.94997e-08
hsa-miR-154-3p	0	0	0.050178	12.0618	14.9647	15.3129	637.328	9.31589	5.34319e-09	5.38719e-08
hsa-miR-590-3p	0.0408646	0	1.80641	20.6369	90.3062	172.552	152.085	7.24874	5.78586e-09	5.76567e-08
hsa-miR-1301-3p	0	0	0.050178	25.8197	7.09401	9.75687	625.463	9.28878	6.09116e-09	6.00014e-08
hsa-miR-138-5p	308.201	387.072	377.991	4.99432	12.1168	12.3768	-36.0128	-5.17044	8.38979e-09	8.17051e-08
hsa-miR-149-5p	16.6728	40.4216	43.0026	909.909	927.555	705.024	25.4094	4.66729	1.21324e-08	1.16825e-07
hsa-miR-3187-3p	0.0408646	0	0.100356	30.2486	3.31399	4.4719	234.037	7.8706	1.70126e-08	1.61998e-07
hsa-miR-137-3p	0.122594	0.0524275	3.663	120.712	277.598	266.959	172.638	7.43161	1.88666e-08	1.77678e-07
hsa-miR-576-5p	0	0.0524275	0.853027	32.5102	50.6937	39.9309	134.101	7.06717	2.45483e-08	2.28673e-07
hsa-miR-340-3p	772.954	811.105	809.873	27.6101	49.2438	27.0121	-23.0061	-4.52394	3.00938e-08	2.77316e-07
hsa-miR-135b-5p	71.1045	84.3034	37.7841	0.565395	0.673154	5.28497	-29.205	-4.86815	3.79193e-08	3.45711e-07
hsa-miR-181a-2-3p	0.0408646	0.0524275	2.55908	41.8392	63.639	64.4586	63.7105	5.99346	9.07845e-08	8.18972e-07
hsa-miR-130b-5p	0.858157	1.31069	4.5662	93.8556	124.016	100.505	47.2678	5.56279	1.31694e-07	1.17564e-06
hsa-miR-374a-5p	0.0817293	0.104855	0.50178	7.5386	15.2236	19.062	60.2574	5.91307	1.38547e-07	1.22407e-06
hsa-miR-199a-3p	0.817293	0.0524275	16.9602	33.0756	91.2383	1983.9	118.12	6.88411	1.5886e-07	1.38922e-06
hsa-miR-412-5p	0	0	0.100356	5.08856	16.5699	16.5776	330.639	8.36911	1.94313e-07	1.68208e-06
hsa-miR-656-3p	0	0	0.100356	0	17.8127	28.5479	388.602	8.60215	2.51504e-07	2.15539e-06
hsa-miR-193b-3p	0.0817293	0.0524275	7.17546	138.239	196.043	235.565	77.7852	6.28142	3.30426e-07	2.80371e-06
hsa-miR-454-3p	0.0408646	0	1.90677	44.9489	61.8784	34.0587	71.7454	6.16481	3.51273e-07	2.95138e-06
hsa-miR-195-3p	39.7613	42.9905	63.7261	0.0942325	2.17481	1.62614	-36.4697	-5.18863	6.41392e-07	5.33663e-06
hsa-miR-3615	0.0817293	0	1.05374	24.312	17.3984	20.1913	53.8116	5.74984	7.04888e-07	5.80855e-06
hsa-miR-494-3p	0	0.0524275	0.200712	0.0942325	22.1623	20.9592	160.094	7.32278	7.19727e-07	5.87435e-06
hsa-miR-758-3p	0	0	0.100356	7.16167	17.6573	10.2086	304.273	8.24922	7.68013e-07	6.20931e-06
hsa-miR-5010-3p	0	0	0	52.2991	16.2075	16.1259	4153.54	12.0201	9.09191e-07	7.28202e-06
hsa-miR-377-5p	0	0	0.050178	11.4964	9.5795	10.6603	463.871	8.85758	1.17764e-06	9.34479e-06
hsa-miR-34c-3p	0.367782	0.314565	140.348	0	0	0.406536	-323.024	-8.3355	1.41517e-06	1.11266e-05
hsa-miR-299-5p	0	0	0.050178	5.08856	12.1168	16.9842	505.424	8.98135	1.44381e-06	1.12486e-05
hsa-miR-376b-5p	0	0	0	9.51749	24.3371	28.8641	3090.7	11.5937	1.87373e-06	1.4403e-05
hsa-miR-628-3p	0	0	0.050178	7.16167	18.0716	6.3239	465.432	8.86243	1.88231e-06	1.4403e-05
hsa-miR-299-3p	0	0	0.050178	9.32902	7.19757	14.9063	465.45	8.86248	2.72208e-06	2.06337e-05
hsa-miR-204-5p	85.4479	45.6119	54.9951	1871.36	2254.81	2163.27	33.7817	5.07817	2.74474e-06	2.06337e-05
hsa-miR-889-5p	0	0	0	11.0252	20.5053	19.1975	2507.13	11.2918	3.32111e-06	2.47495e-05
hsa-miR-3117-3p	0	0	0	22.8043	15.0683	10.1182	2351.4	11.1993	3.71657e-06	2.74578e-05
hsa-miR-2682-3p	0.0408646	0	0.25089	11.1194	12.2721	10.9765	113.427	6.82562	4.25426e-06	3.11616e-05
hsa-miR-409-5p	0	0	0.150534	8.57516	16.3628	7.0918	196.17	7.61596	5.11558e-06	3.7153e-05
hsa-let-7a-2-3p	2.24755	1.25826	0.301068	36.5622	36.6092	45.0804	30.6559	4.93809	6.30151e-06	4.53815e-05
hsa-miR-548d-5p	0	0	0.050178	9.80018	3.62468	8.44692	321.384	8.32815	6.82794e-06	4.87629e-05
hsa-miR-376c-5p	0.0408646	0	0	1.13079	9.89019	12.6478	358.755	8.48686	9.71493e-06	6.85592e-05
hsa-miR-629-3p	0	0	0.050178	5.65395	7.71538	8.26624	326.9	8.35271	9.77062e-06	6.85592e-05
hsa-miR-3173-5p	0	0	0.050178	11.9675	4.76386	3.16195	290.711	8.18344	9.91988e-06	6.85592e-05
hsa-miR-598-3p	0	0	0.150534	4.90009	10.5116	8.67277	148.806	7.21729	9.88558e-06	6.85592e-05
hsa-miR-1910-5p	0	0	0	20.3542	10.8222	6.86595	1863.64	10.8639	1.02831e-05	7.05009e-05
hsa-miR-4448	2.73793	0.0524275	0	85.092	19.2108	19.2427	43.7715	5.45192	1.11644e-05	7.59356e-05
hsa-miR-5581-3p	0	0.0524275	0.050178	3.86353	9.89019	6.18839	173.686	7.44034	1.18843e-05	8.01958e-05
hsa-miR-217-5p	0	0	0.100356	4.14623	8.12963	8.31141	180.491	7.49578	1.53848e-05	0.000103006
hsa-miR-2116-3p	0.0408646	0	0.050178	6.50205	6.21373	6.41424	166.26	7.3773	2.0448e-05	0.000135844
hsa-miR-365b-5p	15.2016	18.3496	39.741	0	2.07124	0.587219	-26.8936	-4.74919	2.0929e-05	0.000137971
hsa-miR-668-3p	0	0	0	3.4866	18.3305	15.6291	1844.57	10.8491	2.34314e-05	0.000153288
hsa-miR-12135	0	0	0.050178	0	12.4792	12.1509	355.062	8.47193	2.46825e-05	0.000160249
hsa-miR-183-5p	21.4948	312.887	129.961	0.282698	3.05508	11.5637	-31.0341	-4.95578	2.85474e-05	0.000183948
hsa-miR-33b-3p	0	0.0524275	0.100356	8.29246	8.18141	2.75541	116.59	6.8653	3.03434e-05	0.000194062
hsa-miR-10399-3p	0	0	0.200712	2.73274	11.1329	7.67902	100.971	6.6578	3.11359e-05	0.000197655
hsa-let-7c-5p	17584	21189.2	9682.05	2654.62	2264.44	1322.91	-7.76298	-2.95661	3.18297e-05	0.000200574
hsa-miR-216a-5p	0.0817293	0.0524275	0.200712	0.188465	10.6151	17.8876	81.067	6.34104	3.98107e-05	0.000249035
hsa-miR-770-5p	0	0	0.050178	11.8733	3.31399	1.89717	248.858	7.95918	4.20378e-05	0.000261061
hsa-miR-487b-5p	0	0	0	18.4696	7.04223	6.45941	1565.15	10.6121	4.50503e-05	0.000277756
hsa-miR-432-3p	0	0	0	8.57516	8.80278	8.08555	1248.97	10.2865	7.13835e-05	0.000436969
hsa-miR-330-5p	64.4027	58.5615	68.3425	4.80586	7.56004	10.7506	-8.137	-3.0245	7.1929e-05	0.000437185
hsa-miR-6746-3p	0	0	0	19.3177	1.0874	5.19463	1253.37	10.2916	7.83397e-05	0.000469491
hsa-miR-887-5p	0	0.0524275	0	6.12511	5.33345	5.42048	246.067	7.94291	7.8086e-05	0.000469491
hsa-miR-4685-3p	0	0.104855	0.150534	4.3347	8.80278	6.23356	75.5133	6.23866	8.08179e-05	0.000480979
hsa-miR-30c-5p	1157.65	1152.15	910.48	109.498	243.112	245.729	-5.37924	-2.4274	8.17028e-05	0.000482892
hsa-miR-589-5p	0	0	0.25089	10.931	5.17811	4.4719	78.2387	6.28981	8.6063e-05	0.000501742
hsa-miR-224-5p	5.02635	8.86024	174.82	1483.5	1655.91	962.633	21.7361	4.44202	8.59663e-05	0.000501742
hsa-miR-1229-3p	0	0	0	20.0715	4.09071	1.0841	1235.58	10.271	9.33399e-05	0.000540489
hsa-miR-10526-3p	0	0	0	22.8043	0.983841	1.5358	1238.5	10.2744	0.000109789	0.00063147
hsa-miR-483-3p	0.0817293	0.0524275	25.9922	0	0	0.0451707	-378.256	-8.56322	0.000114459	0.000653942
hsa-miR-6511a-3p	0	0	0	14.3233	3.0033	3.79434	1033.11	10.0128	0.00012146	0.000689348
hsa-miR-301b-3p	0	0	0.050178	0.0942325	8.64744	8.85346	255.425	7.99676	0.000131924	0.000743808
hsa-miR-381-5p	0	0	0	11.8733	4.9192	5.73668	1099.97	10.1032	0.000149219	0.000835819
hsa-miR-664b-3p	0	0	0.050178	1.97888	2.01946	4.11053	121.62	6.92624	0.000154272	0.000858513
hsa-miR-3661	0	0	0	13.4753	0.983841	5.78185	991.243	9.9531	0.000157942	0.000873269
hsa-miR-3605-5p	0	0	0	8.66939	6.52442	3.97502	934.64	9.86827	0.000192007	0.00103033
hsa-let-7c-3p	0	0	0.050178	4.42893	4.19427	1.89717	153.865	7.26553	0.000191478	0.00103033
hsa-miR-6819-3p	0	0	0.050178	3.4866	3.21043	2.43922	131.316	7.0369	0.000192361	0.00103033
hsa-miR-3130-5p	0.0408646	0	0.050178	2.92121	2.69262	3.29746	78.3922	6.29264	0.000188948	0.00103033
hsa-miR-328-3p	1096.6	717.155	789.802	155.107	107.342	77.9646	-7.65513	-2.93643	0.000190018	0.00103033
hsa-miR-548o-3p	0	0	0	9.32902	2.17481	7.40799	927.199	9.85673	0.00020712	0.0011025
hsa-miR-7704	0	0.0524275	0	6.78474	0.880278	2.03268	139.96	7.12887	0.000214459	0.00113195
hsa-miR-1908-3p	0	0	0.050178	5.27702	1.19096	2.03268	123.431	6.94756	0.000215295	0.00113195
hsa-miR-193b-5p	0	0	0.050178	6.40781	0.93206	1.58097	129.372	7.01538	0.000230494	0.00120447
hsa-miR-134-3p	0	0	0	0	8.23319	15.5387	1163.54	10.1843	0.00023619	0.00122675
hsa-miR-942-5p	0	0	2.65944	54.9376	22.7837	27.9607	39.4796	5.30303	0.000240056	0.00123933
hsa-miR-2355-3p	0	0	0.050178	3.86353	2.79618	1.76166	121.823	6.92864	0.000262193	0.00134551
hsa-miR-382-3p	0	0.0524275	0.050178	0	10.9258	7.67902	155.108	7.27713	0.000269767	0.00137613
hsa-miR-222-5p	43.5617	68.0509	118.169	7.25591	5.54058	17.8424	-7.47564	-2.9022	0.000280397	0.0014219
hsa-miR-769-3p	0	0	0.200712	0	12.6346	11.3378	109.427	6.77383	0.000287702	0.00145036
hsa-miR-1249-3p	17.9396	21.705	24.5371	1.50772	2.53727	1.44546	-11.4744	-3.52034	0.000290294	0.00145486
hsa-miR-216a-3p	0	0	0.050178	2.26158	1.0874	3.20712	97.0379	6.60048	0.000345293	0.00172044
hsa-miR-146a-5p	607.167	1053.63	816.096	30.4371	82.9533	182.219	-8.37465	-3.06603	0.000352652	0.00174695
hsa-miR-1307-5p	0	0	0.050178	0	4.55674	11.5637	232.74	7.86258	0.000355599	0.00175143
hsa-miR-4731-3p	0	0.0524275	0.050178	5.55972	0.673154	2.12302	70.5769	6.14112	0.000369737	0.00181066
hsa-miR-155-5p	2.49274	2.0971	307.993	6271.65	2582.22	2372.82	35.9139	5.16647	0.000373418	0.00181829
hsa-miR-7705	0	0	0	3.95777	7.92251	4.24605	798.462	9.64108	0.000382089	0.00185
hsa-miR-195-5p	763.883	596.1	339.003	15.3599	45.6191	101.002	-10.4802	-3.38959	0.000410509	0.00197644
hsa-miR-340-5p	74.0467	113.925	151.237	3.95777	3.0033	19.1975	-12.9182	-3.69133	0.000419235	0.00200717
hsa-miR-6803-3p	0	0	0.100356	9.98865	1.13918	0.903414	101.61	6.6669	0.00044368	0.00211241
hsa-miR-497-5p	231.089	323.792	261.578	12.9099	25.9941	34.9621	-11.0113	-3.46091	0.000485065	0.00229669
hsa-miR-937-3p	0	0	0.100356	4.61739	2.7444	0.542048	67.1381	6.06906	0.000497953	0.00234476
hsa-miR-92b-3p	76.0082	123.257	134.276	3116.46	684.598	479.171	12.8318	3.68165	0.000529885	0.00248148
hsa-miR-1277-3p	0	0	0.100356	5.55972	1.76056	6.73043	120.987	6.91871	0.000551891	0.00257049
hsa-miR-2110	0	0	0.702492	14.7003	5.43701	10.3441	42.4574	5.40794	0.000613326	0.00284119
hsa-miR-1237-3p	0	0	0	9.14056	1.70878	2.34888	644.133	9.33121	0.000630071	0.00290307
hsa-miR-4645-3p	0	0	0	9.04632	0.983841	1.76166	575.579	9.16887	0.000637327	0.00290526
hsa-miR-641	0	0	0.050178	0	4.14249	5.10429	134.087	7.06702	0.000635485	0.00290526
hsa-miR-6747-3p	0	0	0	5.27702	3.98714	2.75541	580.903	9.18215	0.000695364	0.00313646
hsa-miR-2116-5p	0	0	0	7.35014	1.0874	2.89092	553.026	9.1112	0.000693095	0.00313646
hsa-miR-500a-5p	0	0	0	0	6.93867	9.16965	789.451	9.62471	0.000704127	0.00314854
hsa-miR-1343-3p	0	0	0	5.93665	1.0874	4.1557	547.041	9.0955	0.000705847	0.00314854
hsa-miR-1197	0	0.0524275	0	7.5386	0	2.89092	147.878	7.20827	0.000712738	0.00314854
hsa-miR-4659a-3p	0	0	0.150534	5.84242	5.02277	3.43297	86.7142	6.4382	0.000711485	0.00314854
hsa-miR-940	0	0	0	0	3.26221	12.7381	783.873	9.61448	0.000728048	0.00319968
hsa-miR-589-3p	0	0	0	5.27702	2.38193	1.98751	467.01	8.86731	0.000740311	0.00323697
hsa-miR-12136	0	0	0	0	12.6346	4.60741	844.442	9.72186	0.000755347	0.00326935
hsa-miR-1913	0	0	0	14.5118	0.828497	0.587219	778.165	9.60393	0.000753656	0.00326935
hsa-miR-301a-3p	111.193	125.197	65.9841	0.0942325	12.4275	9.66653	-13.5896	-3.76443	0.000766644	0.00330158
hsa-miR-6749-3p	0	0	0	7.63284	4.34961	2.80058	719.697	9.49125	0.000777469	0.00333145
hsa-miR-548ad-5p	0	0	0	7.72707	1.86412	3.20712	624.158	9.28577	0.000821489	0.00350257
hsa-miR-1287-5p	0	0	0	0	8.64744	7.45316	789.041	9.62396	0.000884526	0.00375267
hsa-miR-193a-5p	0.0408646	0.0524275	11.4406	179.607	70.3705	23.7146	23.6928	4.56638	0.000903216	0.00381309
hsa-miR-629-5p	0	0	0	2.26158	4.81564	1.30995	413.872	8.69304	0.000910934	0.00382682
hsa-miR-4758-3p	0	0	0	6.69051	0.362468	1.76166	430.134	8.74864	0.000930172	0.00388857
hsa-miR-410-5p	0	0	0	0	5.69592	7.90487	667.013	9.38157	0.000953207	0.00396553
hsa-miR-374a-3p	0	0.0524275	0.050178	0	6.93867	5.28497	102.226	6.67562	0.000974522	0.00403461
hsa-miR-3614-5p	0	0	0	3.95777	2.43371	1.94234	399.427	8.64179	0.000984555	0.00405656
hsa-miR-6894-3p	0	0	0.050178	3.95777	0	2.89092	98.8511	6.62718	0.00100445	0.00411824
hsa-miR-362-5p	0	0	2.5089	5.27702	26.2012	22.3143	21.3028	4.41297	0.00100914	0.00411824
hsa-miR-665	0	0	0	0	3.21043	9.7117	633.71	9.30768	0.00103443	0.00419231
hsa-miR-204-3p	0	0	0	10.8367	1.29453	0	591.952	9.20934	0.00104809	0.00419231
hsa-miR-4731-5p	0	0	0	7.63284	2.64084	0.542048	528.194	9.04493	0.00105748	0.00419231
hsa-miR-6724-5p	0	0	0	7.8213	0.673154	0.948585	460.445	8.84689	0.00106153	0.00419231
hsa-miR-6766-3p	0	0	0	1.03656	3.41755	4.24605	433.824	8.76097	0.00104695	0.00419231
hsa-miR-3944-3p	0	0	0	6.31358	0.776716	1.35512	411.262	8.68392	0.00104193	0.00419231
hsa-miR-1262	0	0	0.050178	0	6.31729	3.97502	149.064	7.21978	0.00105177	0.00419231
hsa-miR-452-5p	0	0	0.050178	0	4.40139	2.6199	102.036	6.67294	0.00108035	0.00422768
hsa-miR-378i	78.0514	74.7091	39.4901	0.848093	11.8579	10.6603	-8.19289	-3.03437	0.00107587	0.00422768
hsa-miR-501-5p	0.0408646	0	0	0	6.26551	4.02019	159.159	7.31433	0.00110587	0.00430787
hsa-miR-4742-3p	0	0	0	3.29814	3.52111	0.587219	362.596	8.50222	0.00111466	0.00432245
hsa-miR-380-3p	0	0	0.150534	0	8.38854	8.71794	101.343	6.6631	0.00112545	0.00434463
hsa-miR-431-3p	0	0	0	3.4866	2.22659	1.44546	344.026	8.42637	0.00113773	0.00437237
hsa-miR-6515-3p	0	0	0	3.7693	1.9159	1.94234	365.15	8.51235	0.001156	0.00442273
hsa-miR-219a-1-3p	0	0	0	5.55972	0.776716	0.767902	345.447	8.43232	0.0011803	0.00447574
hsa-miR-370-5p	0	0.0524275	0	0	3.31399	3.92985	103.867	6.6986	0.0011759	0.00447574
hsa-miR-301a-5p	32.2831	45.507	35.4257	0.0942325	0	4.65258	-23.6184	-4.56184	0.00118791	0.00448476
hsa-miR-3200-3p	0	0	0	3.29814	1.50165	1.89717	320.398	8.32372	0.00119923	0.00450763
hsa-miR-655-3p	0	0	0	0	3.21043	10.3893	666.763	9.38103	0.00127315	0.0047646
hsa-miR-655-5p	0	0	0	4.61739	0.828497	1.62614	343.433	8.42388	0.00129156	0.00481246
hsa-miR-652-3p	5000.03	4612.1	4175.21	302.769	331.865	322.519	-14.3954	-3.84754	0.00130942	0.0048579
hsa-miR-3909	0	0	0	0	6.88688	3.16195	493.338	8.94643	0.00143068	0.00528488
hsa-miR-99a-3p	0	0	0	3.58084	1.24275	1.80683	319.506	8.3197	0.00151931	0.0055882
hsa-let-7d-3p	538.678	714.744	1039.19	168.865	114.074	96.846	-6.04018	-2.59459	0.00154649	0.00566385
hsa-miR-10a-5p	10964.7	17512.8	14917.9	1501.97	4086.61	3652.68	-4.69571	-2.23134	0.00157585	0.00572248
hsa-miR-93-5p	1965.43	2244.84	1721.76	210.798	249.637	193.105	-9.07579	-3.18202	0.00157018	0.00572248
hsa-miR-1284	0	0	0.401424	8.104	7.4047	2.84575	44.2083	5.46624	0.00160794	0.00581437
hsa-miR-217-3p	0	0	0.150534	0	8.33675	7.27248	92.5071	6.53149	0.00166438	0.00599317
hsa-miR-4473	0	0	0.100356	7.25591	0.93206	0	68.529	6.09864	0.00167443	0.00600414
hsa-miR-6789-5p	0	0	0	15.7368	0	0	766.027	9.58125	0.00177858	0.006351
hsa-miR-6815-5p	0	0	0.050178	10.3656	0	0	148.049	7.20993	0.00179602	0.00638666
hsa-miR-548l	0	0	0	3.01544	4.97098	0	391.127	8.61149	0.00185036	0.00653133
hsa-miR-380-5p	0	0	0	0	3.31399	4.56224	387.485	8.598	0.00185194	0.00653133
hsa-miR-3085-3p	0	0	0	0	3.98714	3.52331	369.585	8.52976	0.00186309	0.00654373
hsa-miR-199a-5p	0	0	0	0	0	13.9577	680.936	9.41138	0.00205378	0.00718404
hsa-miR-376a-2-5p	0	0	0	0	3.21043	2.89092	300.79	8.23261	0.00218785	0.00762191
hsa-miR-539-3p	0	0	0	0	1.65699	4.38156	297.68	8.21762	0.00224021	0.00777271
hsa-miR-4749-3p	0	0	0	5.08856	0.362468	1.12927	320.243	8.32302	0.00233095	0.00801802
hsa-miR-502-5p	0	0	0	0	3.31399	2.80058	301.423	8.23565	0.00233424	0.00801802
hsa-miR-1185-1-3p	0	0	0.150534	0	5.95482	8.35658	84.8514	6.40687	0.00233898	0.00801802
hsa-miR-3085-5p	0	0	0	0	3.62468	2.48439	301.101	8.2341	0.00237494	0.00810887
hsa-miR-138-1-3p	10.3796	25.4273	4.76691	0	0	1.62614	-24.2794	-4.60166	0.00240173	0.00816777
hsa-miR-3620-3p	0	0	0	8.66939	0	0	422.08	8.72137	0.00249718	0.00845882
hsa-miR-5701	0	0	0	0	0	9.66653	472.226	8.88333	0.00263886	0.00890357
hsa-miR-424-5p	280.944	175.684	1823.12	13.6637	139.964	128.962	-8.06554	-3.01177	0.00269172	0.00904628
hsa-miR-769-5p	0	0	0.150534	0	3.62468	5.78185	55.9068	5.80495	0.00279987	0.00937301
hsa-miR-345-5p	0.122594	0.20971	33.5189	113.55	220.536	171.965	14.9424	3.90134	0.00282288	0.00941327
hsa-miR-6791-3p	0	0	0	3.58084	2.89974	0	316.984	8.30827	0.00293158	0.00973785
hsa-miR-616-3p	0	0	0	6.21935	0	0.722731	338.523	8.40311	0.00294432	0.00974239
hsa-miR-6780b-3p	0	0	0.100356	2.92121	1.96768	1.0841	50.6035	5.66116	0.0029704	0.00979089
hsa-miR-138-2-3p	4.6177	8.23111	0	0	0	0	-703.268	-9.45793	0.00299485	0.00983366
hsa-miR-1294	0	0	0.25089	3.29814	1.70878	2.16819	27.1851	4.76474	0.00315525	0.0103208
hsa-miR-376a-5p	0	0	0	0	2.43371	3.34263	284.966	8.15464	0.0032809	0.010691
hsa-miR-345-3p	0	0	12.7452	0	0	0	-701.672	-9.45465	0.00368287	0.0119554
hsa-miR-6511b-3p	0	0	0	5.18279	0.310687	0.722731	302.39	8.24027	0.00373643	0.0120835
hsa-miR-877-3p	80.7894	100.556	59.7119	24.4062	3.31399	3.47814	-7.75703	-2.9555	0.00376976	0.0121454
hsa-miR-548q	0	0	0	4.61739	1.60521	0	303.752	8.24675	0.00434503	0.0139464
hsa-miR-6885-3p	0	0	0	4.14623	0.776716	0.767902	275.647	8.10668	0.00447169	0.0142994
hsa-miR-548w	0	0	0	0.75386	1.86412	2.43922	256.423	8.00238	0.00477956	0.0152271
hsa-miR-3939	0	0	0	5.37125	0.983841	0	309.927	8.27579	0.0049086	0.0155803
hsa-miR-3157-5p	0	0	0	3.10967	0.46603	1.35512	238.962	7.90064	0.00501313	0.0158533
hsa-miR-6738-3p	0	0	0	6.69051	0	0	325.725	8.34751	0.00520881	0.016388
hsa-miR-542-3p	3.63695	9.43694	3.81353	0	0.46603	0	-33.0583	-5.04694	0.00522044	0.016388
hsa-miR-6743-3p	0	0	0	3.4866	0.569592	0.767902	233.148	7.8651	0.00537837	0.0168221
hsa-miR-7109-3p	0	0	0	2.73274	0.46603	1.30995	218.14	7.76911	0.00550522	0.0171563
hsa-miR-7110-3p	0	0	0	1.79042	0.362468	2.39405	223.847	7.80637	0.00566045	0.0175126
hsa-miR-942-3p	0	0	0.351246	4.14623	2.22659	3.56848	27.5368	4.78329	0.00565325	0.0175126
hsa-miR-328-5p	0	3.93206	2.91033	0	0	0	-374.612	-8.54926	0.00569856	0.0175671
hsa-miR-6752-3p	0	0	0	5.18279	1.03562	0	303.277	8.24449	0.00575909	0.0176901
hsa-miR-99b-5p	20368	24859.5	17377.5	6239.61	5640.46	3141.49	-4.16774	-2.05927	0.00583817	0.017869
hsa-miR-6514-3p	0	0	0	0	3.05508	2.07785	253.448	7.98555	0.00639275	0.0194968
hsa-miR-4725-3p	0	0	0	0	4.45317	0.767902	257.178	8.00663	0.00687305	0.0208872
hsa-miR-5585-3p	0	0	0	4.90009	0	0.858243	280.799	8.1334	0.00697773	0.0211305
hsa-miR-1304-5p	0	0	0	3.29814	0	1.67132	242.882	7.92411	0.00714267	0.0215538
hsa-miR-4466	0	0	0	0	1.39809	3.52331	243.165	7.92579	0.00723302	0.0217306
hsa-miR-224-3p	0	0	0	0	3.72824	1.12927	239.68	7.90497	0.00725198	0.0217306
hsa-miR-4510	171.1	208.032	32.2143	33.1699	24.5442	3.79434	-6.69224	-2.74249	0.00750956	0.022424
hsa-miR-4488	0	0	0	5.27702	0	0	256.874	8.00491	0.00767427	0.0228363
hsa-miR-758-5p	0	0	0	0	3.52111	1.03893	225.147	7.81472	0.0079018	0.023432
hsa-miR-4775	0	0	0	0	3.05508	1.58097	229.101	7.83984	0.00808604	0.0238135
hsa-miR-6516-5p	0	0	0	0	1.86412	2.6199	221.898	7.79375	0.00808411	0.0238135
hsa-miR-6810-3p	0	0	0	5.46549	0	0	266.055	8.05558	0.00813425	0.0238735
hsa-miR-6833-3p	0	0	0	0	2.64084	1.852	222.218	7.79583	0.00834717	0.0242713
hsa-miR-4662a-5p	0	0	0	0	2.01946	2.43922	220.657	7.78566	0.00843971	0.0242713
hsa-miR-651-5p	0	0	0	0	1.76056	2.34888	203.625	7.66977	0.00836427	0.0242713
hsa-miR-4521	0	0	0	0	1.9159	2.16819	202.379	7.66092	0.00842101	0.0242713
hsa-miR-197-5p	0	0	0.050178	6.21935	0	0	88.8537	6.47336	0.00840619	0.0242713
hsa-miR-548j-5p	0	0	0.050178	0	1.44987	2.34888	55.7664	5.80132	0.00832574	0.0242713
hsa-miR-194-5p	89.6979	25.5322	42.6012	0	8.33675	13.2802	-7.28516	-2.86496	0.00848069	0.0243075
hsa-miR-548h-5p	0	0	0	0	5.33345	0	261.184	8.02892	0.00852799	0.0243616
hsa-miR-95-3p	0	0	0	0	3.52111	0.813072	214.01	7.74154	0.00861177	0.0243986
hsa-miR-3679-5p	0	0	0	0	1.39809	2.48439	192.541	7.58902	0.00858129	0.0243986
hsa-miR-624-5p	0	0	0.351246	0	6.52442	4.83326	30.8117	4.94541	0.00865481	0.0243986
hsa-miR-320a-3p	81.4841	119.797	42.9022	314.925	614.434	392.262	5.41261	2.43632	0.00864405	0.0243986
hsa-miR-433-5p	0	0	0	0	1.60521	2.39405	198.25	7.63118	0.00872195	0.0245073
hsa-miR-4745-5p	0	0	0	5.65395	0	0	275.237	8.10453	0.00884048	0.0247591
hsa-miR-147b-5p	1.9615	0.83884	2.10748	0	0	0	-268.617	-8.06941	0.00934027	0.0260737
hsa-miR-450a-1-3p	0.0408646	1.46797	27.2969	0	1.13918	0.135512	-22.0828	-4.46485	0.00955278	0.0265803
hsa-miR-6734-3p	0	0	0	3.29814	0	1.0841	213.806	7.74016	0.00964191	0.0267415
hsa-miR-4781-3p	0	0	0	5.08856	0	0	247.691	7.9524	0.0100551	0.027708
hsa-miR-455-5p	13.7305	10.5379	3.51246	30.2486	60.4285	49.3264	5.03532	2.33208	0.0100543	0.027708
hsa-miR-92b-5p	0	0	1.20427	16.0195	2.01946	4.74292	18.6425	4.22052	0.0100981	0.0277373
hsa-miR-34b-5p	0	0	6.07154	0	0	0	-334.451	-8.38565	0.0102259	0.0279987
hsa-miR-1292-3p	0	0	0	4.80586	0	0	233.917	7.86985	0.0107835	0.0293378
hsa-miR-1537-3p	0	0	0	0	2.53727	1.26478	188.389	7.55757	0.0107824	0.0293378
hsa-miR-766-5p	0	0	0	1.88465	1.03562	0.67756	169.794	7.40764	0.0108735	0.0293818
hsa-miR-1468-5p	0	0	0.050178	0	1.50165	2.16819	53.9224	5.75281	0.0109025	0.0293818
hsa-miR-450a-5p	278.247	192.828	242.209	17.5273	37.7484	49.1005	-6.81669	-2.76907	0.010864	0.0293818
hsa-miR-6879-3p	0	0	0	3.29814	0	0.542048	186.941	7.54644	0.0111159	0.029863
hsa-miR-6875-3p	0	0	0	4.80586	0	0	233.917	7.86985	0.0112036	0.0300046
hsa-miR-6513-3p	0	0	0	0	2.01946	1.71649	185.352	7.53412	0.0114869	0.030641
hsa-miR-6797-3p	0	0	0	2.92121	0.828497	0	182.647	7.51291	0.0115127	0.030641
hsa-miR-7976	0	0	0	0	0	4.24605	208.53	7.70411	0.0116938	0.0309457
hsa-miR-4677-5p	0	0	0	0	1.24275	2.34888	178.35	7.47857	0.0116994	0.0309457
hsa-miR-4684-3p	0	0	0	0	1.29453	2.30371	178.681	7.48124	0.0120787	0.0318506
hsa-miR-7114-3p	0	0	0	0	1.55343	2.03268	178.107	7.4766	0.0125203	0.0329139
hsa-miR-96-5p	4.37252	43.7245	49.2748	2.82698	4.19427	6.86595	-6.98223	-2.80369	0.0125604	0.0329181
hsa-miR-1281	0	0	0	4.24046	0	0	206.362	7.68903	0.0128088	0.0333776
hsa-miR-1292-5p	0	0	0	0.848093	2.07124	0.587219	174.481	7.44692	0.0128136	0.0333776
hsa-miR-6733-3p	0	0	0	4.61739	0	0	224.733	7.81207	0.013162	0.0341814
hsa-miR-6500-3p	0	0	0	4.14623	0	0	201.769	7.65656	0.01331	0.0343573
hsa-miR-590-5p	0	0	0.050178	0	0	4.83326	69.6188	6.12141	0.013284	0.0343573
hsa-miR-6788-3p	0	0.0524275	0	3.01544	0	0.67756	52.3109	5.70904	0.0136483	0.0351249
hsa-miR-550a-5p	0	0	0.301068	2.82698	0.880278	2.25853	18.9651	4.24528	0.0139243	0.0357278
hsa-miR-6895-3p	0	0	0	4.61739	0	0	224.733	7.81207	0.0141135	0.0361053
hsa-miR-3115	0	0	0	0.0942325	1.44987	1.21961	139.437	7.12347	0.0143463	0.0365273
hsa-miR-33a-5p	78.0923	147.426	163.681	21.2023	18.4341	50.7267	-4.30086	-2.10462	0.0143637	0.0365273
hsa-miR-129-5p	1.22594	0.104855	0.150534	10.931	4.97098	3.25229	12.5221	3.64641	0.0145868	0.0369848
hsa-miR-185-3p	0.776428	0	0.100356	0	8.02607	10.5248	20.5513	4.36116	0.0147327	0.0372447
hsa-miR-26a-1-3p	0	0	0	0.0942325	2.53727	0.63239	162.643	7.34557	0.0148283	0.0373761
hsa-miR-4485-5p	0	0	0	3.67507	0	0	178.799	7.4822	0.0149289	0.0375192
hsa-miR-127-5p	0	0	0.050178	0	0	4.24605	61.2404	5.93641	0.0151649	0.038001
hsa-miR-137-5p	0	0	0	4.42893	0	0	215.548	7.75186	0.0152868	0.0381946
hsa-miR-1236-3p	0	0	0	3.58084	0	0	174.205	7.44464	0.0153822	0.0383213
hsa-miR-449a	0.735563	1.1534	1.95694	13.381	10.0455	7.81453	8.11468	3.02053	0.01573	0.0390743
hsa-miR-6513-5p	0	0	0	0	1.0874	1.58097	133.409	7.05971	0.0161574	0.0400198
hsa-miR-1908-5p	0	0	0.25089	0.659628	3.10687	1.67132	20.7797	4.37711	0.0165144	0.0407863
hsa-miR-548aq-3p	0	0	0	0	1.24275	1.40029	132.171	7.04626	0.0167904	0.0413487
hsa-miR-1255a	0	0	0	0	1.86412	0.67756	126.778	6.98616	0.0176238	0.0431789
hsa-miR-30c-2-3p	28.2375	58.2469	77.3745	5.84242	11.599	19.1524	-4.45892	-2.15669	0.0176343	0.0431789
hsa-miR-125b-2-3p	0	0	1.40498	0	13.8773	13.4157	19.1871	4.26207	0.0177675	0.043381
hsa-miR-454-5p	0	0	0	0	0.776716	1.89717	133.575	7.0615	0.0180312	0.0436149
hsa-miR-570-3p	0	0	0	0	1.65699	0.948585	130.132	7.02383	0.0180616	0.0436149
hsa-miR-22-3p	17632.3	25785	22777.9	5548.03	11032.1	14562.2	-2.12555	-1.08784	0.0180668	0.0436149
hsa-miR-155-3p	0	0	4.76691	0	0	0	-262.709	-8.03732	0.0179205	0.0436149
hsa-miR-135b-3p	0	2.62137	1.30463	0	0	0	-215.13	-7.74906	0.018289	0.0440271
hsa-miR-6770-3p	0	0	0	0	1.96768	0.542048	125.069	6.96658	0.0186204	0.0446994
hsa-miR-2682-5p	0	0	0.100356	0	2.84796	1.80683	39.5949	5.30724	0.0186778	0.0447119
hsa-miR-548e-3p	0.0408646	0	0	0	1.29453	1.58097	44.7373	5.48341	0.0187892	0.0448532
hsa-miR-597-3p	0	0	0	0	3.15865	0	155.348	7.27936	0.018862	0.044902
hsa-miR-6741-3p	0	0	0.050178	4.52316	0	0	64.6162	6.01382	0.0202786	0.0481407
hsa-miR-3960	0	0	0	2.26158	0	0.271024	122.835	6.94057	0.0207728	0.0491777
hsa-miR-103a-1-5p	1.02162	2.56895	0	0	0	0	-196.937	-7.62159	0.020872	0.0492763
hsa-miR-1233-3p	0	0	0	0.659628	0.207124	1.49063	117.883	6.88122	0.0210063	0.0494572
hsa-miR-3688-3p	0	0	0.050178	0	1.03562	2.21336	47.8404	5.58016	0.0213398	0.0500168
hsa-miR-29c-5p	127.947	133.847	110.492	14.606	37.7484	41.3312	-3.96239	-1.98637	0.0213607	0.0500168
hsa-miR-187-5p	0.0408646	3.93206	0	0	0	0	-218.461	-7.77123	0.0215259	0.0502661
hsa-miR-574-5p	112.051	141.397	139.244	753.766	359.257	439.646	3.95309	1.98298	0.0218228	0.050821
hsa-miR-505-5p	3.31004	0	1.90677	17.5273	9.47594	9.30516	6.91699	2.79014	0.0222043	0.0515693
hsa-miR-551a	0	0	0	0	0	3.11678	153.588	7.26292	0.0226974	0.052572
hsa-miR-30d-5p	9230.22	9060.99	3799.43	908.119	2093.15	2143.17	-4.29395	-2.10231	0.0232298	0.0536602
hsa-miR-1271-3p	0	0	0	0	0	2.9361	144.798	7.17789	0.0233171	0.0537171
hsa-miR-15b-3p	36.2061	55.2061	58.4574	3.39237	16.7253	15.4484	-4.19465	-2.06855	0.0233864	0.0537323
hsa-miR-3162-3p	0	0	0	2.45005	0	0	119.036	6.89525	0.0239865	0.0549637
hsa-miR-484	627.558	771.313	695.618	153.222	229.287	215.193	-3.50077	-1.80767	0.0245516	0.0561087
hsa-miR-2277-3p	0	0	0	0	0	2.30371	114.035	6.83333	0.0254263	0.0579497
hsa-miR-10a-3p	41.8862	67.0547	48.8232	9.80018	19.7286	16.1711	-3.43091	-1.77859	0.0254924	0.0579497
hsa-miR-6851-3p	0	0	0	0	2.48549	0	122.587	6.93766	0.0258265	0.0585538
hsa-miR-548c-5p	0	0	0	0	2.48549	0	122.587	6.93766	0.0265764	0.060095
hsa-miR-4695-3p	0	0.0524275	0.050178	0.188465	1.0874	1.94234	28.2917	4.8223	0.0267789	0.0603934
hsa-miR-181c-5p	277.798	140.034	104.019	22.4273	55.354	40.6085	-4.40321	-2.13855	0.0271937	0.0611679
hsa-miR-656-5p	0	0	0	0	0.828497	1.30995	107.652	6.75023	0.0273266	0.061306
hsa-miR-1276	0	0	0	0	1.0874	0.993755	104.845	6.71212	0.0278005	0.0622063
hsa-miR-576-3p	0	0	0	0	0.828497	0.813072	83.6227	6.38582	0.0294318	0.0656505
hsa-miR-323b-5p	0	0	0	0	0.517811	1.0841	81.5758	6.35007	0.0294929	0.0656505
hsa-miR-1285-3p	0	0	0.050178	3.29814	0	0	47.0963	5.55754	0.0297665	0.0660879
hsa-miR-6870-3p	0	0	0	0	1.19096	0.496878	85.3261	6.41492	0.0300442	0.0665319
hsa-miR-5189-5p	0	0	0	0	0	2.21336	109.641	6.77664	0.0303607	0.0669221
hsa-miR-6878-3p	0	0	0	0	0.724935	1.21961	98.2374	6.6182	0.0304539	0.0669221
hsa-miR-579-5p	0	0	0	0	0.93206	0.813072	88.5748	6.46882	0.0304546	0.0669221
hsa-miR-4677-3p	0	0	0	0	1.50165	0.406536	95.7449	6.58112	0.0308356	0.0674136
hsa-miR-628-5p	0	0	0	0	0.569592	1.21961	90.6288	6.5019	0.0307663	0.0674136
hsa-miR-1228-5p	0	0	0	0	2.22659	0	109.986	6.78118	0.0311009	0.0676484
hsa-miR-3174	0	0	0	0	1.19096	0.542048	87.5826	6.45257	0.0310915	0.0676484
hsa-miR-140-3p	18.3074	19.7652	11.9424	0	3.36577	5.556	-5.56689	-2.47687	0.0315359	0.068421
hsa-miR-615-3p	0.0817293	0	0.702492	3.01544	2.84796	2.25853	10.1821	3.34796	0.0317518	0.0687154
hsa-miR-210-5p	0	0	0	0	1.13918	0.587219	87.3538	6.4488	0.0319569	0.068985
hsa-miR-619-5p	0	0	0	0	2.22659	0	109.986	6.78118	0.0332045	0.0714981
hsa-miR-186-3p	0	0	2.60926	0	0	0	-144.114	-7.17107	0.0337457	0.0724814
hsa-miR-4701-5p	0	0	0	0	0.724935	0.767902	76.497	6.25733	0.0338464	0.072516
hsa-miR-3189-3p	0	0	0	0	0.776716	0.722731	76.7793	6.26265	0.0339502	0.0725568
hsa-miR-30b-5p	186.465	173.535	205.228	3.4866	46.0334	72.0924	-4.64414	-2.21541	0.0340694	0.0726306
hsa-miR-4683	0	0	0	0	2.12302	0	104.946	6.71351	0.0344151	0.0731855
hsa-miR-4423-5p	0	0	0	0	2.07124	0	102.426	6.67844	0.0348309	0.0738863
hsa-miR-1296-5p	0	0	0.200712	0.0942325	2.12302	1.98751	19.5917	4.29217	0.0351161	0.0743075
hsa-miR-6850-5p	0	0	0	0	1.9159	0	94.8665	6.56783	0.0352478	0.0744024
hsa-miR-5002-5p	0	0	0	0	0	2.03268	100.854	6.65612	0.0354662	0.0744927
hsa-miR-6716-3p	0	0	0	0	0.983841	0.496878	75.4516	6.23748	0.0356144	0.0744927
hsa-miR-6812-3p	0	0	0	0	0.93206	0.542048	75.2548	6.23371	0.0355175	0.0744927
hsa-miR-4485-3p	6.08883	3.19808	1.80641	39.5777	3.36577	6.36907	4.42507	2.1457	0.0356383	0.0744927
hsa-miR-3622a-3p	0	0	0	0	2.07124	0	102.426	6.67844	0.0359974	0.0748781
hsa-miR-4804-3p	0	0	0	0	0.673154	0.767902	74.0263	6.20997	0.0359697	0.0748781
hsa-miR-6777-3p	0	0	0	0	1.96768	0	97.3864	6.60565	0.0365109	0.0757624
hsa-miR-6827-3p	0	0	0	0	1.81234	0	89.8268	6.48907	0.0366458	0.0758585
hsa-miR-329-5p	0	0	0	0	0.673154	0.767902	74.0263	6.20997	0.0369045	0.0760268
hsa-miR-548s	0	0	0.050178	0	0.414249	1.76166	32.3069	5.01377	0.0368304	0.0760268
hsa-miR-5582-3p	0	0	0	0	1.60521	0	79.7481	6.31738	0.0376951	0.0774694
hsa-miR-1268a	0.694699	0	0.451602	5.93665	1.03562	7.8597	12.5956	3.65485	0.0386707	0.079095
hsa-miR-342-5p	3.80041	20.237	5.46941	0.0942325	1.50165	2.48439	-7.09893	-2.8276	0.0386495	0.079095
hsa-miR-1225-3p	0	2.51652	0	0	0	0	-138.934	-7.11826	0.0392922	0.0801749
hsa-miR-3176	0	0	0	0	0	1.76166	87.6747	6.45409	0.0396607	0.080617
hsa-miR-548f-3p	0	0	0	0	0	1.67132	83.2825	6.37994	0.0396971	0.080617
hsa-miR-4797-3p	0	0	0	0	0	1.67132	83.2825	6.37994	0.0409601	0.082598
hsa-miR-548n	0	0	0	0	0	1.58097	78.8909	6.30179	0.0409617	0.082598
hsa-miR-542-5p	248.988	192.514	136.836	22.9927	48.1564	41.557	-5.12081	-2.35637	0.0408606	0.082598
hsa-miR-29b-3p	481.753	848.067	594.911	47.022	127.692	365.205	-3.564	-1.8335	0.0417699	0.08403
hsa-miR-548ab	0	0	0	0.659628	0.517811	0.0903414	60.2081	5.91189	0.0426717	0.0856431
hsa-miR-320d	1.55286	0.20971	0.050178	9.51749	6.31729	1.49063	9.34978	3.22493	0.0434759	0.0870535
hsa-miR-3194-3p	0	0	0	0	0.724935	0.451707	61.0712	5.93242	0.0437859	0.0873129
hsa-miR-4435	0	0	0	0	0.724935	0.451707	61.0712	5.93242	0.0438093	0.0873129
hsa-let-7f-1-3p	287.524	539.112	798.834	67.7532	205.467	191.072	-3.4998	-1.80727	0.0445158	0.0885151
hsa-let-7b-3p	33.2638	46.5556	232.726	7.16167	8.95813	48.8747	-4.80382	-2.26418	0.0446541	0.0885846
hsa-miR-4785	0	0	0	0	0	1.40029	70.1096	6.13154	0.044982	0.089029
hsa-miR-3934-5p	0	0	0	0	0.776716	0.496878	65.7197	6.03825	0.0455611	0.0899675
hsa-miR-92a-1-5p	0	0	0.903205	9.04632	1.55343	1.5358	13.1707	3.71926	0.0464287	0.0914699
hsa-miR-3691-5p	0	0	0	0	1.39809	0	69.6705	6.12248	0.0469728	0.0923295
hsa-miR-1185-2-3p	0	0	0	0	1.39809	0	69.6705	6.12248	0.0473221	0.0928034
hsa-miR-6740-3p	0	0	0	0	0.414249	0.67756	57.2996	5.84045	0.0478968	0.0937159
hsa-miR-501-3p	1.3894	0	0.25089	6.97321	4.86742	3.34263	9.02884	3.17454	0.0482555	0.094076
hsa-let-7e-3p	477.176	621.108	946.809	176.686	265.999	205.075	-3.15639	-1.65828	0.0483004	0.094076
hsa-miR-4524a-5p	0	0	0	0	0.310687	0.767902	56.2608	5.81406	0.049057	0.0951279
hsa-miR-29c-3p	139.021	99.1403	72.6076	8.95209	26.9779	41.9636	-3.98141	-1.99328	0.0490625	0.0951279
hsa-miR-6799-3p	0	0	0	0	0	1.35512	67.9148	6.08565	0.0496658	0.0960804
hsa-miR-3158-3p	0	0	0.050178	0	0.517811	1.0841	24.2562	4.60028	0.0502137	0.0969214
hsa-miR-6805-5p	0	0	0	0	0	1.35512	67.9148	6.08565	0.0507383	0.0973623
hsa-miR-365a-3p	394.957	586.139	367.805	136.92	77.9823	167.538	-3.52705	-1.81846	0.0507829	0.0973623
hsa-miR-483-5p	0	0	1.80641	0	0	0	-100.012	-6.64403	0.050751	0.0973623
hsa-miR-194-3p	0	0	1.80641	0	0	0	-100.012	-6.64403	0.051835	0.0991576
hsa-miR-4804-5p	0	0	0	0	0	1.26478	63.5259	5.98927	0.0521967	0.099429
hsa-miR-3074-3p	1.67545	0	0.050178	0	0	0	-95.9048	-6.58353	0.052209	0.099429
hsa-miR-664a-5p	0	0	0.451602	3.39237	1.81234	0.406536	11.9681	3.58112	0.0533671	0.101409
hsa-miR-190b-5p	9.64405	8.80782	7.32599	0	2.69262	1.0841	-6.69532	-2.74315	0.0540105	0.102405
hsa-miR-3611	0	0	0	0	0	1.21961	61.3318	5.93856	0.0547662	0.103608
hsa-miR-6505-3p	0	0	0	0	0.0517811	0.993755	53.4194	5.73929	0.0549854	0.103716
hsa-miR-10395-3p	1.34853	0	0	9.70595	1.81234	3.97502	11.2188	3.48785	0.055065	0.103716
hsa-miR-1910-3p	0	0	0	0	0	1.21961	61.3318	5.93856	0.0559102	0.105077
hsa-miR-5001-5p	0	0	0	0	1.13918	0	57.0761	5.83481	0.0562731	0.105182
hsa-miR-4727-5p	0	0	0	0	1.13918	0	57.0761	5.83481	0.0564569	0.105182
hsa-miR-10525-3p	0	0	0	0	0	1.12927	56.9446	5.83149	0.05609	0.105182
hsa-miR-767-5p	0	0	0	0	0	1.12927	56.9446	5.83149	0.0564272	0.105182
hsa-miR-548au-5p	0	0	0	0	0	1.17444	59.1381	5.88602	0.0569137	0.105803
hsa-miR-1268b	0	0	0	0	0	1.21961	61.3318	5.93856	0.0576898	0.107013
hsa-miR-544a	0	0	0	0	0.362468	0.587219	50.6659	5.66294	0.0578326	0.107046
hsa-miR-4645-5p	0	0	0	0	0	1.0841	54.7516	5.77483	0.0580227	0.107167
hsa-miR-6786-3p	0	0	0	0	0	1.17444	59.1381	5.88602	0.0582483	0.107352
hsa-miR-6807-3p	0	0	0	0	0	1.21961	61.3318	5.93856	0.0588804	0.108123
hsa-miR-874-5p	0	0	0	0	0	1.21961	61.3318	5.93856	0.0589188	0.108123
hsa-miR-676-3p	0	0	0	0	1.0874	0	54.5577	5.76971	0.0618457	0.112556
hsa-miR-6514-5p	0	0	0	0	1.0874	0	54.5577	5.76971	0.0617887	0.112556
hsa-miR-499b-5p	0	0	0	0	0	1.03893	52.559	5.71587	0.062131	0.112556
hsa-miR-1256	0	0	0	0	0	1.03893	52.559	5.71587	0.0622437	0.112556
hsa-miR-5001-3p	0	0	0	0	0	1.03893	52.559	5.71587	0.0622539	0.112556
hsa-miR-760	0	1.62525	1.10392	19.1292	4.45317	0	8.58507	3.10183	0.0618431	0.112556
hsa-miR-206	9.80751	3.09322	4.1146	0.0942325	0	2.16819	-7.36611	-2.8809	0.0621229	0.112556
hsa-miR-216b-3p	0	0	0	0	1.0874	0	54.5577	5.76971	0.0625857	0.112918
hsa-miR-196b-5p	362.755	478.82	478.648	2543.9	2641.3	1662.01	5.18641	2.37474	0.0629267	0.113294
hsa-miR-6821-3p	0	0	0	0.0942325	0	0.858243	48.6408	5.60409	0.0632522	0.113642
hsa-miR-4479	0	0	0	0	0	0.993755	50.3669	5.6544	0.0644259	0.114816
hsa-miR-1193	0	0	0	0	0	0.993755	50.3669	5.6544	0.0644415	0.114816
hsa-miR-9-3p	0	0	1.40498	0	0	0	-77.9691	-6.28483	0.064326	0.114816
hsa-miR-4508	0	0	1.40498	0	0	0	-77.9691	-6.28483	0.0643711	0.114816
hsa-miR-6501-3p	0	0	0	0	1.03562	0	52.0395	5.70154	0.0651816	0.115893
hsa-miR-4524a-3p	0	0	0	0	0	0.993755	50.3669	5.6544	0.0654218	0.11608
hsa-miR-219b-5p	0	0	0	0	0	0.993755	50.3669	5.6544	0.0660001	0.116864
hsa-miR-6779-3p	0	0	0	0.75386	0.0517811	0	38.0251	5.24888	0.0663192	0.117187
hsa-miR-144-3p	0	0	19.9709	0	0	1.35512	-14.469	-3.85489	0.0672705	0.118587
hsa-miR-150-3p	0	0	1.30463	0	0	0	-72.4592	-6.1791	0.0673884	0.118587
hsa-miR-548ay-5p	0	0	0	0	0.983841	0	49.5216	5.62999	0.0682284	0.119444
hsa-miR-3175	0	0	0	0	0.983841	0	49.5216	5.62999	0.0682131	0.119444
hsa-miR-6787-3p	0	0	0	0	0.983841	0	49.5216	5.62999	0.0682936	0.119444
hsa-miR-5690	0	0	0.050178	0	0	1.5358	22.5715	4.49643	0.0686003	0.119736
hsa-miR-33a-3p	0	1.25826	0	0	0	0	-69.8075	-6.12531	0.0689754	0.120146
hsa-let-7a-3p	202.852	256.161	1000.95	23.3697	77.827	289.183	-3.73912	-1.9027	0.0693875	0.120619
hsa-miR-132-5p	43.6434	30.9322	37.5833	76.4226	184.444	102.944	3.24422	1.69787	0.0696736	0.120871
hsa-miR-4454	5.14894	7.91655	7.17546	73.3129	8.59566	3.25229	4.19971	2.07029	0.0701341	0.121424
hsa-miR-659-5p	0	0	0	0	0	0.948585	48.1753	5.59022	0.0705488	0.121628
hsa-miR-548ah-3p	0	0	0	0	0	0.948585	48.1753	5.59022	0.0706776	0.121628
hsa-miR-3188	0	0	0	0	0.93206	0	47.0039	5.55471	0.0705487	0.121628
hsa-miR-5697	0	0	0	0	0.93206	0	47.0039	5.55471	0.0709991	0.121936
hsa-miR-5586-5p	0	0	0.050178	0	0.724935	0.451707	18.2394	4.18898	0.0711736	0.121992
hsa-miR-16-2-3p	0	0	1.20427	0	6.42085	8.53726	12.2544	3.61523	0.07165	0.122563
hsa-miR-1293	0	0	0	0	0	0.903414	45.9843	5.52307	0.0734198	0.12534
hsa-miR-561-5p	0	0	0	0	0.776716	0.0451707	42.0718	5.39478	0.0742349	0.12648
hsa-miR-6888-3p	0	0	0	0	0	0.858243	43.7939	5.45266	0.0762793	0.129705
hsa-miR-6820-3p	0	0	0	0	0	0.858243	43.7939	5.45266	0.0764314	0.129706
hsa-miR-1306-3p	12.7498	18.7166	20.3723	10.8367	2.43371	1.49063	-3.54548	-1.82598	0.0769212	0.13028
hsa-miR-26b-3p	14.18	23.5399	6.32243	0	2.53727	7.18214	-4.5062	-2.17191	0.0771672	0.130439
hsa-miR-3193	0	0	0	0	0.880278	0	44.4865	5.4753	0.0775611	0.130846
hsa-miR-30e-5p	58.8042	43.2527	23.3328	2.92121	17.502	19.3331	-3.14473	-1.65294	0.0801444	0.134939
hsa-miR-1243	0	0	0	0	0.828497	0	41.9695	5.39127	0.0804072	0.135041
hsa-miR-6770-5p	0	0	0	0	0.828497	0	41.9695	5.39127	0.0805426	0.135041
hsa-miR-6802-3p	0	0	0	0	0.828497	0	41.9695	5.39127	0.0806779	0.135041
hsa-miR-3159	0	0	0	0	0	0.813072	41.6043	5.37866	0.0816639	0.136425
hsa-miR-1287-3p	0	0	0	0	0	0.813072	41.6043	5.37866	0.0827231	0.137925
hsa-miR-548at-3p	0	0	0	0	0	0.813072	41.6043	5.37866	0.0842008	0.139351
hsa-miR-101-5p	0	0	0	0	0.776716	0	39.4529	5.30206	0.0846269	0.139351
hsa-miR-3126-3p	0	0	0	0	0.776716	0	39.4529	5.30206	0.0846567	0.139351
hsa-miR-4730	0	0	0	0	0.776716	0	39.4529	5.30206	0.0846865	0.139351
hsa-miR-6753-3p	0	0	0	0	0.776716	0	39.4529	5.30206	0.0847164	0.139351
hsa-miR-4787-3p	0	0	0.100356	0	0.93206	0.903414	16.0515	4.00463	0.0839046	0.139351
hsa-miR-374b-5p	14.3843	28.6778	15.1036	24.5947	74.6165	58.1347	2.70823	1.43735	0.0845234	0.139351
hsa-miR-143-3p	18.7569	14.837	13.0965	5.46549	2.7444	6.7756	-3.11874	-1.64096	0.0850474	0.139533
hsa-miR-1469	1.02162	0	0	0	0	0	-57.43	-5.84373	0.0851527	0.139533
hsa-miR-1179	0	0	0	0	0	0.767902	39.4155	5.30069	0.0860089	0.140065
hsa-miR-6861-5p	0	0	0	0	0	0.767902	39.4155	5.30069	0.0861526	0.140065
hsa-miR-6510-3p	0	0	0	0	0	0.767902	39.4155	5.30069	0.0862962	0.140065
hsa-miR-7854-3p	0	0	0	0	0	0.767902	39.4155	5.30069	0.0866241	0.140065
hsa-miR-3191-3p	0	0	0	0	0	0.767902	39.4155	5.30069	0.0866868	0.140065
hsa-miR-3684	0	0	0	0	0	0.767902	39.4155	5.30069	0.086819	0.140065
hsa-miR-6836-3p	0	0	0	0	0.724935	0	36.9366	5.20698	0.0868636	0.140065
hsa-miR-3682-5p	0	0	0	0	0.724935	0	36.9366	5.20698	0.0871104	0.140065
hsa-miR-584-3p	0	0	0	0	0.724935	0	36.9366	5.20698	0.0873563	0.140065
hsa-miR-4660	0	0	0	0	0.724935	0	36.9366	5.20698	0.0873975	0.140065
hsa-miR-7112-3p	0	0	0	0	0.724935	0	36.9366	5.20698	0.0874387	0.140065
hsa-miR-140-5p	184.177	213.904	220.482	22.8985	70.733	64.3682	-3.90897	-1.96679	0.0868009	0.140065
hsa-miR-6515-5p	0	0	0	0	0.724935	0	36.9366	5.20698	0.0876672	0.140169
hsa-miR-548ar-5p	0	0	0	0	0	0.722731	37.2277	5.2183	0.0894612	0.141571
hsa-miR-362-3p	0	0	0	0	0	0.722731	37.2277	5.2183	0.0896213	0.141571
hsa-miR-3121-3p	0	0	0	0	0	0.722731	37.2277	5.2183	0.0895887	0.141571
hsa-miR-3944-5p	0	0	0	0	0	0.722731	37.2277	5.2183	0.0898653	0.141571
hsa-miR-2277-5p	0	0	0.050178	0	1.19096	0	17.5457	4.13304	0.0894777	0.141571
hsa-miR-3064-5p	2.61534	2.0971	4.66656	0	0	1.03893	-8.59057	-3.10275	0.0890157	0.141571
hsa-miR-1973	0.899022	0	0	0	0	0	-50.7206	-5.6645	0.0897264	0.141571
hsa-miR-181d-3p	0	0	0.953383	0	0	0	-53.1777	-5.73275	0.0894465	0.141571
hsa-miR-3179	0	0	0	0	0	0.67756	35.041	5.13097	0.0908461	0.142597
hsa-miR-548ar-3p	0	0	0	0	0	0.67756	35.041	5.13097	0.0910978	0.142597
hsa-miR-1278	0	0	0	0	0	0.67756	35.041	5.13097	0.0913485	0.142597
hsa-miR-548h-3p	0	0	0	0	0.673154	0	34.4209	5.10521	0.0911028	0.142597
hsa-miR-548aq-5p	0	0	0	0	0.673154	0	34.4209	5.10521	0.0913136	0.142597
hsa-miR-4667-3p	0	0	0	0	0	0.67756	35.041	5.13097	0.0915982	0.142723
hsa-miR-513b-5p	0	0	0	0	0	0.67756	35.041	5.13097	0.0917622	0.142723
hsa-miR-122-3p	0	0	0.050178	0	1.29453	0	19.0238	4.24974	0.0928759	0.144193
hsa-miR-200a-3p	3.80041	5.60974	10.3367	0	0.0517811	3.07161	-6.22671	-2.63847	0.0933738	0.144443
hsa-miR-429	0.122594	0.157282	30.709	0	2.43371	1.5358	-7.7497	-2.95414	0.0933057	0.144443
hsa-miR-4484	0	0	0	0	0.621373	0	31.9056	4.99574	0.0946889	0.146213
hsa-miR-146b-5p	17.8987	22.3865	10.3367	7.5386	2.79618	6.27873	-3.06482	-1.6158	0.0950925	0.146572
hsa-miR-181b-3p	0	0	0	0	0	0.63239	32.8555	5.03806	0.0960339	0.146956
hsa-miR-6511b-5p	0	0	0	0	0	0.63239	32.8555	5.03806	0.0962897	0.146956
hsa-miR-6847-3p	0	0	0	0	0	0.63239	32.8555	5.03806	0.0964158	0.146956
hsa-miR-605-5p	0	0	0	0	0	0.63239	32.8555	5.03806	0.0965417	0.146956
hsa-miR-378d	2.32928	1.1534	2.91033	0	0	0.903414	-6.68123	-2.74011	0.0961332	0.146956
hsa-miR-219a-5p	1.02162	1.36311	1.90677	0	0.258905	0.135512	-8.97873	-3.16651	0.0959047	0.146956
hsa-miR-497-3p	0	0	0.903205	0	0	0	-50.4236	-5.65603	0.0964137	0.146956
hsa-miR-4728-3p	0	0	0	0	0.621373	0	31.9056	4.99574	0.0968828	0.146958
hsa-miR-129-1-3p	0	0	0	0	0.569592	0	29.3909	4.8773	0.0970575	0.146958
hsa-miR-29b-1-5p	16.6319	20.1846	24.6876	13.0983	4.09071	5.37531	-2.75355	-1.4613	0.0969841	0.146958
hsa-miR-378b	0.286052	0.20971	0.150534	0	0	0	-36.9902	-5.20907	0.0979803	0.148094
hsa-miR-6509-3p	0.0408646	0	0	0	1.03562	0	16.5403	4.04791	0.0986423	0.148832
hsa-miR-7111-3p	0	0	0	0	0.155343	0.225853	23.5776	4.55935	0.0991935	0.1494
hsa-miR-3688-5p	0	0	0	0	0.569592	0	29.3909	4.8773	0.0996359	0.149803
hsa-miR-3180-5p	0	0	0	0	0.569592	0	29.3909	4.8773	0.0998826	0.149911
hsa-miR-6755-5p	0	0	0	0	0.569592	0	29.3909	4.8773	0.100129	0.150018
hsa-miR-218-1-3p	0	0	0	0	0	0.587219	30.6715	4.93883	0.100702	0.150026
hsa-miR-4638-3p	0	0	0	0	0	0.587219	30.6715	4.93883	0.100931	0.150026
hsa-miR-1228-3p	0	0	0	0	0	0.587219	30.6715	4.93883	0.10116	0.150026
hsa-miR-3121-5p	0	0	0	0	0	0.587219	30.6715	4.93883	0.101388	0.150026
hsa-miR-6886-3p	0	0	0	0	0.569592	0	29.3909	4.8773	0.100532	0.150026
hsa-miR-580-3p	0	0	0	0	0.569592	0	29.3909	4.8773	0.101484	0.150026
hsa-miR-3913-5p	0	0	0	0	0.569592	0	29.3909	4.8773	0.101535	0.150026
hsa-miR-4680-3p	0.0408646	0	0	0	1.03562	0	16.5403	4.04791	0.101102	0.150026
hsa-miR-1-3p	0.735563	0.104855	2.80997	2.82698	1.50165	16.1711	5.60028	2.4855	0.102514	0.151213
hsa-miR-548at-5p	0	0	0	0	0	0.587219	30.6715	4.93883	0.103405	0.152264
hsa-miR-6751-3p	0	0	0	0	0	0.587219	30.6715	4.93883	0.103624	0.152325
hsa-miR-561-3p	0	0	0	0	0.517811	0	26.8767	4.74828	0.104083	0.152738
hsa-miR-6755-3p	0	0	0	0	0.517811	0	26.8767	4.74828	0.104329	0.152838
hsa-miR-6883-3p	0	0	0	0	0.517811	0	26.8767	4.74828	0.104747	0.153188
hsa-miR-548al	0	0	0	0	0	0.542048	28.4892	4.83234	0.104928	0.153191
hsa-miR-338-5p	10.1344	10.0136	9.78472	0	4.60852	0	-6.45405	-2.69021	0.105646	0.153977
hsa-miR-1285-5p	0	0	0.100356	0	0	1.852	15.7767	3.97972	0.105869	0.154041
hsa-miR-574-3p	47.8933	55.4683	66.5863	239.916	158.347	161.079	3.28916	1.71772	0.106059	0.154055
hsa-miR-10b-5p	3454.25	4653.99	4023.93	531.095	1433.35	1285.65	-3.73256	-1.90017	0.106319	0.154171
hsa-miR-33b-5p	0	0.0524275	0.050178	0	0.880278	0.451707	11.9053	3.57354	0.106728	0.154503
hsa-miR-106b-5p	10.1344	20.3419	14.2004	0	2.79618	8.49209	-3.93828	-1.97756	0.107104	0.154786
hsa-miR-146a-3p	0	0	0	0	0	0.496878	26.3089	4.71748	0.107735	0.155243
hsa-miR-422a	12.5863	3.77478	2.70961	1.69619	1.50165	1.12927	-4.43489	-2.1489	0.107782	0.155243
hsa-miR-6727-3p	0	0	0	0	0.46603	0	24.3629	4.60662	0.108362	0.155816
hsa-miR-3177-3p	0	0	0	0	0.46603	0	24.3629	4.60662	0.109747	0.157542
hsa-miR-3934-3p	0	0	0	0	0.46603	0	24.3629	4.60662	0.1103	0.158072
hsa-miR-1249-5p	0	0	0.702492	0	0	0	-39.4077	-5.3004	0.111269	0.159004
hsa-miR-1298-5p	0	0	0.702492	0	0	0	-39.4077	-5.3004	0.111321	0.159004
hsa-miR-1537-5p	0	0	0	0	0	0.451707	24.131	4.59282	0.112018	0.159493
hsa-miR-451a	46.177	94.3694	5317.67	135.695	320.836	862.083	-4.13925	-2.04937	0.112036	0.159493
hsa-miR-556-3p	0	0	0	0	0	0.451707	24.131	4.59282	0.112525	0.159923
hsa-miR-939-5p	0	0	0	0	0	0.451707	24.131	4.59282	0.113027	0.160106
hsa-miR-3200-5p	0	0	0.100356	0	0	1.44546	12.3941	3.63158	0.112946	0.160106
hsa-miR-592	0.694699	0	0	0	0	0	-39.5484	-5.30555	0.116573	0.164856
hsa-miR-579-3p	0	0	0	0	0.414249	0	21.8495	4.44953	0.117638	0.166088
hsa-miR-6817-3p	0	0	0	0	0.414249	0	21.8495	4.44953	0.120349	0.169358
hsa-miR-320e	0	0	0	0.0942325	0.155343	0.0451707	15.0823	3.91478	0.120242	0.169358
hsa-miR-142-5p	0	0	1.50534	0	0	0.0903414	-13.0004	-3.70049	0.1206	0.169433
hsa-miR-6516-3p	0	0	0	0	0.414249	0	21.8495	4.44953	0.121617	0.170583
hsa-miR-627-5p	0	0	0	0	0.414249	0	21.8495	4.44953	0.12223	0.170892
hsa-miR-6780a-3p	0	0	0	0	0.362468	0	19.3358	4.2732	0.122237	0.170892
hsa-miR-582-3p	0	0	0.100356	0	0	1.35512	11.6426	3.54134	0.123165	0.171909
hsa-miR-1234-3p	0	0	0	0	0.362468	0	19.3358	4.2732	0.125075	0.173726
hsa-miR-6852-5p	0	0	0.050178	0	0.93206	0	13.8511	3.79193	0.124789	0.173726
hsa-miR-338-3p	10.5431	4.03692	2.15766	3.01544	0.46603	0.135512	-4.72379	-2.23994	0.124921	0.173726
hsa-miR-4732-5p	0	0	0.551958	0	0	0	-31.1456	-4.96096	0.125564	0.174123
hsa-miR-129-2-3p	1.22594	0	0	5.18279	1.70878	0.903414	6.18874	2.62965	0.125879	0.174278
hsa-miR-6824-3p	0	0	0	0	0.362468	0	19.3358	4.2732	0.129058	0.178105
hsa-miR-3912-3p	0	0	0.050178	0	0	0.903414	13.562	3.76149	0.128986	0.178105
hsa-miR-142-3p	0	0	3.06086	0	0	0.225853	-12.1206	-3.59939	0.12961	0.178578
hsa-miR-548as-5p	0	0	0	0	0.310687	0	16.8209	4.07218	0.130396	0.179374
hsa-miR-378e	0.245188	0.104855	0.050178	0	0	0	-24.1563	-4.59433	0.13077	0.179599
hsa-miR-6832-3p	0	0	0	0	0.310687	0	16.8209	4.07218	0.131752	0.180658
hsa-miR-1291	0	0	0	0	0.362468	0	19.3358	4.2732	0.13238	0.180941
hsa-miR-4286	0.817293	0.471847	0.602136	8.104	1.76056	0.587219	5.39906	2.43271	0.132364	0.180941
hsa-miR-744-3p	44.3381	85.2995	106.277	15.9253	37.3859	32.9746	-2.72838	-1.44805	0.134681	0.183793
hsa-miR-1914-5p	0	0	0	0	0.310687	0	16.8209	4.07218	0.135405	0.184194
hsa-miR-135a-5p	0.53124	0	0	0	0	0	-30.625	-4.93664	0.135311	0.184194
hsa-miR-6868-3p	0	0	0	0	0.310687	0	16.8209	4.07218	0.137944	0.187351
hsa-miR-548g-5p	0	0	0	0	0	0.271024	15.4532	3.94984	0.138167	0.187356
hsa-miR-27a-5p	69.3881	113.401	137.137	44.2893	28.8938	48.2423	-2.63501	-1.39781	0.140529	0.190258
hsa-miR-6889-3p	0	0	0	0	0.258905	0	14.3022	3.83817	0.142423	0.192518
hsa-miR-148b-5p	2.00237	10.1185	1.30463	0	0.0517811	1.94234	-6.57957	-2.71799	0.14381	0.194086
hsa-miR-125b-1-3p	305.341	422.565	409.403	241.047	96.5717	108.907	-2.54858	-1.3497	0.144106	0.19418
hsa-miR-320a-5p	0.490376	0	0	0	0	0	-28.3971	-4.82767	0.145277	0.195451
hsa-miR-7702	0	0	0	0	0	0.225853	13.2966	3.73298	0.14707	0.197553
hsa-miR-4791	0.245188	0.62913	4.21495	0	0	0.722731	-6.669	-2.73747	0.147668	0.198046
hsa-miR-190a-5p	0.490376	3.09322	0.150534	0	0	0.496878	-6.94177	-2.7953	0.148041	0.198237
hsa-miR-450b-3p	0.0817293	0.104855	0.100356	0	0	0	-16.4852	-4.0431	0.151847	0.203015
hsa-miR-744-5p	113.44	165.881	78.2777	80.4746	25.1656	28.2769	-2.67394	-1.41897	0.153768	0.205264
hsa-miR-126-3p	387103	633506	547694	228004	394195	387235	-1.55365	-0.635657	0.154942	0.206509
hsa-miR-183-3p	0	0.943694	3.61282	0	0	0.496878	-8.61309	-3.10653	0.155543	0.206988
hsa-miR-4796-5p	0	0	0.050178	0	0	0.767902	11.6351	3.54041	0.158026	0.209966
hsa-miR-30d-3p	16.6728	7.13014	21.7271	0.188465	9.3206	5.82702	-2.95666	-1.56397	0.159297	0.211327
hsa-miR-191-3p	0.286052	0.366992	319.484	23.4639	25.4763	28.2317	-4.14756	-2.05226	0.162451	0.215179
hsa-miR-7977	216.991	437.979	450.448	4207.01	86.5262	93.0516	3.96815	1.98847	0.162839	0.21536
hsa-miR-30b-3p	0	0	10.0858	0	0.880278	0.542048	-6.9697	-2.8011	0.165712	0.218821
hsa-miR-5100	10.2162	18.1923	57.7047	222.577	13.6184	16.1259	2.92888	1.55035	0.16607	0.218956
hsa-miR-605-3p	0	0	0	0	0	0.180683	11.1496	3.47892	0.168701	0.222085
hsa-miR-215-5p	0	0	0.702492	0	0	0.0451707	-10.2671	-3.35995	0.179117	0.235435
hsa-miR-181d-5p	123.738	106.48	113.804	45.7028	56.9074	41.3764	-2.38825	-1.25595	0.180459	0.236188
hsa-miR-29a-5p	27.5836	19.6603	12.9459	10.3656	5.07455	9.57619	-2.41599	-1.27262	0.180259	0.236188
hsa-miR-193a-3p	35.5522	43.043	22.9314	0	6.47264	22.5853	-3.48848	-1.8026	0.180517	0.236188
hsa-miR-548i	0	0	0	0	0.103562	0.0451707	9.41081	3.23432	0.181597	0.237184
hsa-miR-449b-5p	0	0	0	0	0.0517811	0.0903414	9.4103	3.23424	0.181832	0.237184
hsa-miR-222-3p	769.849	2128.19	2295.85	5072.44	5313.83	4216.91	2.81163	1.49141	0.182487	0.237677
hsa-miR-6726-3p	0	0	0	0.0942325	0	0.0903414	9.41187	3.23448	0.185391	0.241093
hsa-miR-5189-3p	0	0	0	0	0.155343	0	9.22186	3.20506	0.198879	0.258241
hsa-miR-147a	0.0817293	0.0524275	0.050178	0	0	0	-11.357	-3.50551	0.20084	0.260393
hsa-miR-3134	0	0	0	0	0.155343	0	9.22186	3.20506	0.201317	0.260617
hsa-miR-19b-3p	3.63695	11.901	45.8627	0	3.31399	16.0808	-3.15939	-1.65964	0.201708	0.26073
hsa-miR-4501	0	0	0	0	0.155343	0	9.22186	3.20506	0.204849	0.26439
hsa-let-7d-5p	5049.68	6847.97	2578.05	1883.71	1964	1316.68	-2.80301	-1.48698	0.205679	0.265063
hsa-miR-4725-5p	0	0	0	0	0.155343	0	9.22186	3.20506	0.206568	0.26541
hsa-miR-212-3p	4.65857	1.46797	6.37261	0.0942325	27.91	9.7117	3.0159	1.59259	0.206557	0.26541
hsa-miR-125a-5p	5636.62	7044.99	5827.98	3109.3	2034.17	3241.95	-2.20739	-1.14234	0.210292	0.269713
hsa-miR-30a-5p	3304.48	2932.58	1460.68	267.432	965.51	1159.8	-3.21692	-1.68568	0.210546	0.269713
hsa-miR-3074-5p	0.122594	0	0.050178	0	0	0	-11.356	-3.50539	0.211715	0.270805
hsa-miR-378a-5p	8.86762	17.0914	4.06442	0	2.79618	5.28497	-3.68994	-1.8836	0.212387	0.271261
hsa-miR-550a-3p	0	0	0.25089	0	0.46603	1.35512	6.94847	2.79669	0.218355	0.278309
hsa-miR-99b-3p	135.589	181.766	231.471	89.5209	72.2346	57.1409	-2.50999	-1.32768	0.218556	0.278309
hsa-miR-25-3p	251.481	350.582	406.342	127.874	215.875	112.836	-2.20805	-1.14277	0.223219	0.283825
hsa-miR-378a-3p	1044.62	873.232	528.626	397.661	578.964	428.037	-1.74157	-0.800391	0.229462	0.291332
hsa-miR-1275	0	0	0.100356	0	0.828497	0	7.20033	2.84806	0.231937	0.294039
hsa-let-7b-5p	11344.2	12455.9	6740.47	7724.99	4369.96	2900.95	-2.03662	-1.02618	0.234941	0.297407
hsa-miR-7-5p	31.4249	178.673	9910.51	97.1537	48.1564	2511.81	-3.80882	-1.92935	0.241195	0.304873
hsa-miR-326	66.3642	27.2099	26.2431	0.188465	8.85457	39.9761	-2.44186	-1.28798	0.247366	0.312214
hsa-miR-125a-3p	23.6198	37.5381	23.383	3.86353	18.4858	11.4282	-2.49155	-1.31704	0.256143	0.322815
hsa-miR-652-5p	0	0	12.1933	0	1.50165	0.948585	-4.92952	-2.30145	0.257603	0.324179
hsa-miR-25-5p	7.47823	25.5322	17.4118	18.5638	1.44987	1.67132	-2.33434	-1.22301	0.265388	0.333485
hsa-miR-15b-5p	100.404	256.58	258.618	55.6914	119.718	101.815	-2.21934	-1.15013	0.267321	0.335424
hsa-miR-4497	0	0	0	0.0942325	0	0.0451707	6.57735	2.71751	0.267785	0.335515
hsa-miR-10400-5p	0.0408646	0	0	0	0.0517811	0.135512	3.68232	1.88062	0.272696	0.341169
hsa-miR-374b-3p	2.24755	2.30681	3.16122	7.5386	4.03892	8.53726	2.60053	1.3788	0.274407	0.342808
hsa-miR-133b	0	0	0	0	0	0.0903414	6.57589	2.71719	0.275705	0.34293
hsa-miR-421	5.63932	3.40779	2.35837	0.0942325	14.1362	15.7194	2.62542	1.39255	0.275449	0.34293
hsa-miR-182-5p	1.43026	21.2331	31.7627	0	3.93536	15.8549	-2.7449	-1.45676	0.27537	0.34293
hsa-miR-6757-3p	0	0	0	0	0	0.0903414	6.57589	2.71719	0.276347	0.343231
hsa-miR-486-3p	0.0817293	0.0524275	2.10748	0.282698	0.0517811	0.180683	-4.36902	-2.12731	0.277775	0.344506
hsa-miR-3177-5p	0	0	0	0	0.103562	0	6.5766	2.71734	0.278592	0.345019
hsa-miR-548b-5p	0	0	0	0	0.103562	0	6.5766	2.71734	0.281713	0.347879
hsa-miR-23b-3p	1019	489.201	847.156	240.481	495.959	672.456	-1.67157	-0.741203	0.281656	0.347879
hsa-miR-532-5p	195.496	299.833	303.928	358.555	553.229	573.623	1.859	0.894527	0.284752	0.351126
hsa-miR-26b-5p	1886.52	1671.44	1767.97	294.477	977.161	824.681	-2.54034	-1.34502	0.289126	0.356007
hsa-miR-221-5p	0.939886	4.82333	2.86015	0	12.5828	14.0481	3.08808	1.62671	0.295283	0.362879
hsa-miR-200c-3p	0	0.262137	0.050178	0	0	0.0451707	-4.37442	-2.12909	0.295554	0.362879
hsa-miR-1303	0	0	0.301068	0	1.55343	0.0451707	5.09612	2.3494	0.303477	0.372074
hsa-miR-148a-3p	0	0.0524275	0.50178	0	1.50165	1.0841	4.60302	2.20258	0.309722	0.378647
hsa-miR-221-3p	561.357	1021.18	1143.16	3162.63	2287.48	1484.31	2.54405	1.34712	0.309547	0.378647
hsa-miR-29b-2-5p	4.94462	11.4292	4.76691	0.0942325	6.73154	0.767902	-2.76677	-1.4682	0.314806	0.384314
hsa-miR-671-3p	5.92537	8.44082	2.25801	3.58084	2.33015	0	-2.82424	-1.49786	0.317884	0.38697
hsa-miR-200a-5p	0	0	0.301068	0	0	0.0451707	-4.44026	-2.15064	0.317484	0.38697
hsa-miR-1255b-5p	0	0	0.150534	0	0	0.813072	5.01941	2.32752	0.319595	0.3885
hsa-miR-32-5p	41.4367	39.4779	46.0634	3.95777	18.2269	45.1255	-1.88327	-0.913237	0.325898	0.395601
hsa-let-7f-2-3p	1.87977	1.10098	17.1609	0	0.828497	5.69151	-3.07048	-1.61846	0.327906	0.397476
hsa-miR-124-3p	0	0	1.20427	0	0	0.225853	-4.77902	-2.25672	0.335461	0.406059
hsa-miR-203a-3p	0	1.1534	0	0	3.46933	0.948585	3.80098	1.92637	0.341702	0.413031
hsa-miR-503-3p	0.245188	0.104855	5.06798	7.44437	2.7444	4.92361	2.78113	1.47567	0.35089	0.423539
hsa-miR-133a-3p	0	0	1.85659	0	0	6.91112	3.6983	1.88686	0.357934	0.430223
hsa-miR-181c-3p	0.204323	0.733985	2.20783	0.0942325	0.828497	0.0451707	-3.14098	-1.65121	0.357532	0.430223
hsa-miR-450b-5p	0	0	19.5694	0	1.29453	4.1557	-3.57594	-1.83832	0.357098	0.430223
hsa-miR-139-5p	21275.4	6435.79	3225.85	4417.72	8444.2	6052.87	-1.6356	-0.709816	0.363817	0.436072
hsa-miR-130a-3p	83.2821	162.892	81.0877	41.0854	72.4935	69.0208	-1.79028	-0.840185	0.363504	0.436072
hsa-miR-29a-3p	1173.39	1148.63	1179.99	227.477	727.162	897.135	-1.89095	-0.919114	0.369886	0.442726
hsa-miR-342-3p	320.583	519.189	583.269	285.902	306.182	244.644	-1.70071	-0.766138	0.372183	0.444855
hsa-miR-192-5p	116.219	51.5362	61.0165	15.7368	57.5288	49.4167	-1.86278	-0.897461	0.374735	0.44666
hsa-miR-4732-3p	0	0	2.70961	0	0	0.587219	-4.42776	-2.14658	0.37458	0.44666
hsa-let-7a-5p	43.5617	45.2973	9167.88	142.857	76.9985	22890	2.49655	1.31993	0.38101	0.453155
hsa-miR-320b	2.57447	5.81945	0.150534	8.104	4.40139	7.63385	2.35325	1.23465	0.381242	0.453155
hsa-miR-23a-5p	4.20906	5.29517	0.953383	0	0.983841	2.48439	-2.9637	-1.5674	0.385195	0.457219
hsa-miR-330-3p	0.0817293	0.104855	5.77047	6.12511	6.36907	2.75541	2.55459	1.35309	0.391832	0.464454
hsa-miR-188-5p	2.57447	2.14953	0	0	4.40139	9.53102	2.94287	1.55722	0.397837	0.470921
hsa-miR-30a-3p	929.997	923.877	1229.21	419.241	665.128	672.592	-1.75436	-0.810942	0.399736	0.472037
hsa-miR-144-5p	0	0	1.55552	0	0	0.361366	-4.02262	-2.00814	0.399882	0.472037
hsa-miR-31-3p	200.645	548.496	478.448	110.064	262.996	339.142	-1.72327	-0.785145	0.401384	0.473158
hsa-miR-1306-5p	21.4539	27.0001	50.73	36.5622	11.1847	10.4796	-1.70806	-0.772355	0.404302	0.475943
hsa-let-7f-5p	17057.3	22541.4	12125.9	10009.9	14206.7	9367.05	-1.54017	-0.623092	0.409428	0.479999
hsa-miR-130a-5p	1.3894	2.25438	4.26513	0	0.93206	1.89717	-2.71885	-1.443	0.408506	0.479999
hsa-miR-20b-5p	0.163459	0.366992	0.401424	0	0.0517811	0.180683	-2.99728	-1.58365	0.408952	0.479999
hsa-miR-9-5p	0	0	17.1609	0	0	5.01395	-3.40896	-1.76933	0.410434	0.480522
hsa-miR-16-5p	2276.61	4095.42	3235.83	1089.71	1440.96	2067.33	-2.08946	-1.06313	0.41218	0.481908
hsa-miR-28-3p	0.449511	0.41942	204.927	175.084	118.32	149.154	2.15035	1.10457	0.418832	0.489018
hsa-let-7i-5p	16113.9	20618.6	19075.1	28801.1	23880.2	18667.8	1.27848	0.354426	0.420447	0.490236
hsa-miR-30c-1-3p	1.87977	2.51652	3.41211	0.0942325	1.0874	2.03268	-2.33895	-1.22586	0.42121	0.490458
hsa-miR-196a-5p	1.87977	0.996122	7.62706	0.565395	2.12302	1.35512	-2.55959	-1.35591	0.425461	0.494263
hsa-miR-378h	0.694699	0.524275	0.602136	0	0.310687	0.225853	-2.85768	-1.51485	0.425631	0.494263
hsa-miR-103a-2-5p	2.37015	5.50488	1.20427	11.3079	1.24275	7.36282	2.18554	1.12799	0.436619	0.506336
hsa-miR-34a-5p	11610.3	10798.2	13077.7	13351.1	20796.7	18301.1	1.47803	0.563671	0.456043	0.527435
hsa-miR-425-5p	437.701	827.41	567.714	332.829	476.438	500.536	-1.39902	-0.484418	0.455844	0.527435
hsa-miR-27b-5p	7.19217	16.1477	10.6377	11.6848	2.33015	6.64009	-1.65365	-0.725651	0.463035	0.534799
hsa-miR-1246	0	0	3.76335	0	0.0517811	1.12927	-3.12251	-1.64271	0.4688	0.540729
hsa-miR-1827	0	0.157282	0	0.188465	0.0517811	0.180683	2.60162	1.37941	0.476397	0.548753
hsa-miR-23a-3p	5933.91	5887.76	7592.44	3230.76	6073.97	3621.24	-1.50192	-0.586808	0.487883	0.561229
hsa-miR-339-5p	8.33638	12.1107	4.81709	22.8043	10.2527	6.95629	1.57653	0.656748	0.49879	0.573007
hsa-miR-30e-3p	71.5131	108.263	216.217	49.1894	104.391	100.279	-1.55902	-0.640644	0.509278	0.584051
hsa-miR-93-3p	1.83891	3.35536	2.45872	0	1.34631	2.25853	-2.07491	-1.05305	0.509766	0.584051
hsa-miR-19a-3p	0	0	0.702492	0	1.24275	0.587219	2.58649	1.371	0.515261	0.589187
hsa-miR-874-3p	4.65857	17.9826	8.17902	4.90009	17.4502	24.7987	1.53355	0.616876	0.515625	0.589187
hsa-miR-218-5p	0	0	320.236	4.80586	1.03562	712.387	2.24275	1.16527	0.518791	0.592016
hsa-miR-10b-3p	8.74503	6.868	2.30819	4.90009	2.38193	2.89092	-1.78056	-0.832327	0.523359	0.595643
hsa-miR-1260a	3.96387	6.34372	1490.79	65.2089	10.874	732.714	-1.85591	-0.892128	0.522881	0.595643
hsa-miR-378g	0.858157	1.25826	1.05374	0.282698	3.8318	1.852	1.90787	0.93196	0.524348	0.595976
hsa-miR-17-5p	19.2064	41.208	24.0855	5.84242	22.7837	23.1726	-1.62633	-0.701623	0.527844	0.599155
hsa-miR-21-5p	115630	418766	372201	141687	311027	275714	-1.24459	-0.315676	0.529696	0.600463
hsa-miR-34a-3p	0.612969	0	0.802849	0	1.34631	2.03268	2.37972	1.25079	0.53396	0.604496
hsa-miR-98-5p	2565.03	3058.93	2113.7	1371.74	1748.7	1328.06	-1.73933	-0.798529	0.53629	0.606333
hsa-miR-122-5p	1.34853	3.72235	3.51246	0.565395	14.0327	1.62614	1.89389	0.921355	0.538643	0.608191
hsa-miR-132-3p	0.53124	0.314565	2.5089	0.282698	0.828497	5.51082	1.98336	0.98795	0.540201	0.609148
hsa-miR-32-3p	3.43263	3.14565	8.88151	2.07312	3.26221	3.25229	-1.78055	-0.832322	0.542137	0.610528
hsa-miR-21-3p	0.0408646	0	39.189	10.3656	23.8711	42.9122	1.96634	0.975512	0.544603	0.612499
hsa-miR-100-3p	0	0	26.3435	0	3.41755	8.22107	-2.2599	-1.17626	0.54657	0.613907
hsa-miR-339-3p	0.653834	0.733985	35.3253	10.4598	19.2626	31.7098	1.67353	0.742898	0.551451	0.618578
hsa-miR-184	0	1.31069	2.30819	0	0	1.44546	-2.45862	-1.29785	0.552662	0.619126
hsa-miR-296-5p	0	0	0.050178	0.0942325	0.0517811	0	1.97807	0.984095	0.555403	0.621385
hsa-miR-191-5p	2504.06	2065.54	2155.7	1020.16	1554.57	1374.82	-1.70259	-0.767729	0.560173	0.625277
hsa-miR-128-1-5p	0.0817293	0.576702	3.71317	0	0.362468	1.852	-1.94081	-0.95666	0.560342	0.625277
hsa-miR-4455	0	0	0.050178	0.0942325	0.0517811	0	1.97807	0.984095	0.563302	0.627763
hsa-miR-185-5p	64.4435	64.7479	27.5979	3.67507	45.0495	58.8574	-1.45631	-0.54232	0.578559	0.641276
hsa-miR-151a-3p	85.1619	147.269	690.349	115.435	205.105	298.578	-1.49033	-0.575631	0.577654	0.641276
hsa-miR-324-5p	20.5958	14.0506	16.2577	0	12.6346	19.062	-1.60409	-0.681755	0.577746	0.641276
hsa-miR-212-5p	3.75955	1.46797	1.75623	0	2.48549	1.26478	-1.83529	-0.876012	0.579169	0.641276
hsa-miR-20a-3p	0	0	2.55908	0	0	0.993755	-2.52116	-1.33409	0.578071	0.641276
hsa-miR-223-3p	0.612969	0.262137	3.06086	0.0942325	0.0517811	2.03268	-1.77353	-0.826624	0.593386	0.65617
hsa-miR-151a-5p	2496.62	2391.16	2855.43	2773.17	5205.29	3941.28	1.53942	0.62239	0.595914	0.658117
hsa-miR-9985	12.8724	6.50101	19.9709	0.848093	7.92251	17.8424	-1.47416	-0.559891	0.602094	0.664086
hsa-miR-211-5p	0.0408646	0	2.70961	0.0942325	0.0517811	5.10429	1.90839	0.932356	0.611558	0.673657
hsa-miR-363-3p	0	0	0.853027	0	0	0.361366	-2.21881	-1.14979	0.612468	0.673793
hsa-miR-216b-5p	0	0	0.702492	0	1.55343	0.0451707	2.25564	1.17354	0.615361	0.676108
hsa-miR-423-5p	117.649	215.11	138.692	186.863	62.6033	83.5206	-1.41666	-0.502496	0.61875	0.678961
hsa-miR-92a-3p	87.0008	327.619	5808.81	576.892	192.574	3000.64	-1.65072	-0.723093	0.624597	0.684501
hsa-miR-7-1-3p	9.97097	25.8992	30.2072	7.16167	21.282	18.0683	-1.41632	-0.502145	0.634167	0.693215
hsa-miR-107	2.90139	0	1.65588	0	0.0517811	2.48439	-1.78082	-0.832544	0.633907	0.693215
hsa-miR-6129	0.0408646	0	0.050178	0.0942325	0.0517811	0.0451707	1.66581	0.736226	0.63654	0.694557
hsa-miR-181a-3p	106.044	161.162	159.115	136.637	249.326	183.167	1.33571	0.417605	0.637015	0.694557
hsa-miR-152-3p	54.7586	21.7574	16.4082	32.3218	47.1208	40.4729	1.29023	0.367623	0.64446	0.701782
hsa-miR-6130	0	0.104855	0	0.0942325	0.0517811	0.0451707	1.66565	0.736084	0.647645	0.704355
hsa-miR-101-3p	0.326917	0.943694	23.7844	0	6.99045	7.81453	-1.68945	-0.756553	0.649651	0.705641
hsa-miR-503-5p	0.0408646	0.0524275	13.1466	0	12.3757	10.1634	1.70219	0.767395	0.668769	0.725487
hsa-miR-20a-5p	20.514	59.8722	54.0919	40.3315	26.9779	41.4667	-1.23619	-0.305895	0.677644	0.734185
hsa-miR-31-5p	1573.86	3775.93	2948.21	1852.8	1981.3	2116.83	-1.39438	-0.479622	0.692024	0.748819
hsa-miR-141-3p	0	1.73011	0.200712	0	0	1.03893	-1.81551	-0.860371	0.693479	0.749447
hsa-let-7g-5p	7194.67	7209.72	5333.67	5017.32	7037.2	3719.9	-1.25127	-0.323395	0.702611	0.757624
hsa-miR-532-3p	5.35327	11.8486	3.71317	0	4.81564	9.03414	-1.50536	-0.590105	0.702813	0.757624
hsa-let-7g-3p	8.58157	2.62137	5.26869	5.65395	1.81234	4.06536	-1.44225	-0.528326	0.705244	0.759289
hsa-miR-324-3p	5.02635	9.59423	2.35837	6.59628	7.87072	7.90487	1.32039	0.400969	0.710215	0.763681
hsa-miR-106a-5p	0.0408646	0	0.150534	0.0942325	0.0517811	0	-1.56607	-0.647151	0.717852	0.770926
hsa-miR-18a-5p	4.24992	18.2972	8.2292	0	9.52772	12.6026	-1.38827	-0.473288	0.720595	0.772903
hsa-miR-23b-5p	14.0574	21.9147	25.7413	37.8815	22.8355	17.1649	1.25844	0.331641	0.725013	0.776537
hsa-miR-502-3p	0.122594	0.0524275	8.88151	5.46549	0	0.0451707	-1.64913	-0.721704	0.725795	0.776537
hsa-miR-200b-5p	0	0	0.100356	0	0	0.0451707	-1.51024	-0.594774	0.736594	0.787109
hsa-let-7e-5p	3031.13	3848.81	529.178	2060.11	1880.48	1511.77	-1.35889	-0.442425	0.738676	0.78835
hsa-miR-10527-5p	1.83891	1.93982	1.35481	0	6.73154	0.948585	1.4993	0.58429	0.743129	0.792117
hsa-miR-223-5p	0	0	0.25089	0	0	0.135512	-1.57818	-0.658259	0.745743	0.793916
hsa-miR-582-5p	34.9801	65.6916	90.9226	23.087	70.0598	60.8901	-1.24252	-0.313266	0.753727	0.801419
hsa-miR-375-3p	2.24755	3.30293	1.55552	1.60195	1.81234	1.67132	-1.38361	-0.468441	0.756379	0.803243
hsa-miR-186-5p	20.6366	13.1069	12.7954	17.9042	24.9585	15.6291	1.25558	0.328349	0.763035	0.809308
hsa-miR-378f	0.163459	0.262137	1.15409	0	0	1.03893	-1.47234	-0.55811	0.783071	0.829532
hsa-miR-320c	5.06721	5.13789	0	9.23479	3.57289	1.0841	1.35678	0.440189	0.784209	0.829713
hsa-miR-331-5p	1.67545	3.77478	0	0	3.41755	4.38156	1.43259	0.518631	0.786163	0.829922
hsa-miR-24-3p	20091	31343	13465.8	22863.9	25763.4	22135.4	1.09034	0.124777	0.787312	0.829922
hsa-miR-106b-3p	8.0912	13.369	12.7954	7.72707	11.599	9.12448	-1.19353	-0.255232	0.787063	0.829922
hsa-miR-151b	9.31714	2.93594	5.36905	9.04632	7.6636	4.83326	1.21334	0.278981	0.791672	0.833493
hsa-miR-27b-3p	3516.81	2249.19	2456.01	764.509	3328.33	2651.43	-1.21909	-0.285799	0.810299	0.851143
hsa-miR-577	0	0	0.150534	0	0	0.0903414	-1.3223	-0.403051	0.810423	0.851143
hsa-let-7i-3p	22.5164	22.7535	21.5264	12.9099	20.9713	43.8607	1.16686	0.222632	0.814106	0.853964
hsa-miR-200b-3p	1.75718	1.25826	4.51602	0.0942325	2.79618	2.9361	-1.2779	-0.353771	0.823155	0.8624
hsa-miR-24-1-5p	9.43973	5.55731	5.7203	2.82698	4.19427	10.2537	-1.19021	-0.251211	0.830322	0.867788
hsa-miR-331-3p	26.1534	27.5768	16.4584	0.0942325	25.0103	32.3874	-1.22002	-0.286911	0.829551	0.867788
hsa-miR-425-3p	46.6674	41.575	24.4869	13.381	50.383	36.9948	-1.11723	-0.159923	0.83951	0.876322
hsa-miR-103a-3p	222.671	172.015	124.943	183.942	220.795	179.508	1.12427	0.168984	0.852467	0.888764
hsa-miR-148b-3p	21.74	29.8312	11.5911	15.6426	23.7675	15.5839	-1.14725	-0.198183	0.855486	0.890828
hsa-miR-361-3p	0	0	3.61282	0	2.33015	2.21336	1.2591	0.332396	0.858941	0.892764
hsa-miR-24-2-5p	0.980751	1.31069	252.697	37.5045	101.077	161.847	1.17825	0.236644	0.860471	0.892764
hsa-miR-1260b	178.783	123.676	117.065	219.373	76.4807	76.3385	-1.12795	-0.173699	0.860294	0.892764
hsa-miR-28-5p	66.9771	125.249	96.4422	49.0952	107.705	99.8724	-1.12355	-0.16806	0.864019	0.895362
hsa-miR-145-5p	0.163459	0.0524275	0.050178	0.0942325	0.155343	0	-1.22056	-0.287542	0.877279	0.908005
hsa-miR-126-5p	1617.54	1921.47	1343.07	1003.58	1219.91	2040.09	-1.14499	-0.195337	0.878906	0.908592
hsa-miR-22-5p	55.5759	54.9964	35.7769	42.7816	41.0624	48.9199	-1.10192	-0.140023	0.882263	0.910963
hsa-miR-27a-3p	7273.7	9596.53	13773.6	3603.17	12080.1	17326.7	1.07722	0.107312	0.888121	0.915908
hsa-miR-1261	8.00947	11.2719	23.0317	10.6483	20.1428	15.3129	1.0925	0.127631	0.889855	0.916593
hsa-miR-17-3p	0	0	5.41923	0	0.983841	5.51082	1.19964	0.262597	0.89664	0.922474
hsa-miR-361-5p	37.0642	56.8314	25.8417	27.6101	43.7032	40.8795	-1.06549	-0.0915205	0.900797	0.925639
hsa-miR-181a-5p	0.858157	0	5213.65	10.6483	0.776716	4427.54	-1.17471	-0.232304	0.909863	0.933835
hsa-miR-19b-1-5p	0	1.62525	0	0	1.29453	0.63239	1.19235	0.253808	0.912333	0.935251
hsa-miR-378c	0	0.0524275	0	0	0	0.0451707	1.12518	0.170155	0.922293	0.944331
hsa-miR-486-5p	5.435	8.54568	21.6267	18.658	9.78662	9.57619	1.06544	0.0914453	0.92342	0.944357
hsa-miR-6887-3p	0	0	0.050178	0	0	0.0451707	1.12519	0.170174	0.926508	0.945259
hsa-miR-181b-5p	1615.26	1311.58	1183.7	1588.48	1311.82	889.185	-1.08484	-0.117477	0.925767	0.945259
hsa-miR-210-3p	0	0	1.85659	0	0	2.12302	1.147	0.19787	0.929614	0.946174
hsa-miR-1843	0.286052	0.0524275	19.2684	2.73274	10.7187	4.29122	-1.10427	-0.143098	0.928851	0.946174
hsa-miR-490-5p	0	0	1.15409	0	0	0.993755	-1.14563	-0.196142	0.934919	0.950445
hsa-miR-491-5p	2.28842	0	2.25801	0	1.65699	2.48439	-1.09305	-0.128355	0.940987	0.955481
hsa-miR-128-3p	48.7515	59.1906	58.909	38.2584	83.4193	37.2207	-1.04913	-0.0691955	0.943448	0.956846
hsa-miR-423-3p	2478.97	4251.19	4117.56	3940.05	3513.45	2949.78	-1.04273	-0.0603669	0.947264	0.95958
hsa-miR-671-5p	12.4637	20.9186	2.86015	0	24.0782	14.0481	1.05256	0.0739001	0.953678	0.964937
hsa-miR-98-3p	0.980751	0.733985	5.16834	0	0.0517811	7.31765	1.07352	0.102352	0.958329	0.968483
hsa-miR-499a-5p	1.9615	4.50876	6.1719	0	2.69262	9.21482	-1.05807	-0.0814316	0.959442	0.968483
hsa-miR-139-3p	276.408	107.686	115.309	273.651	86.1119	126.252	-1.02793	-0.0397414	0.966378	0.973192
hsa-miR-26a-2-3p	0	0	2.60926	0	0.673154	1.76166	-1.06559	-0.0916581	0.966193	0.973192
hsa-miR-877-5p	18.6343	17.0914	1.95694	19.4119	13.0488	6.36907	1.02866	0.040764	0.967903	0.973583
hsa-miR-125b-5p	111.846	181.766	8587.47	13.381	26.2012	9233.07	1.04409	0.062249	0.969695	0.974243
hsa-miR-18a-3p	2.86052	6.23887	6.82421	10.931	4.14249	1.30995	1.02155	0.0307667	0.982179	0.98563
hsa-miR-23c	0.858157	0.41942	1.65588	0.282698	0.983841	1.62614	1.01921	0.0274474	0.985269	0.987574
hsa-miR-15a-5p	27.461	37.8526	36.1282	37.1276	25.1138	38.5758	-1.0067	-0.00962733	0.989727	0.990883
hsa-miR-26a-5p	4.0456	5.50488	6613.77	0	3.8318	6619.4	-1.00001	-1.6378e-05	0.999994	0.999994
hsa-miR-548ag	0	0	0	0.0942325	0	0	3.74245	1.90398	0.452415	#N/A
hsa-miR-4800-3p	0	0	0	0.0942325	0	0	3.74245	1.90398	0.452415	#N/A
hsa-miR-6131	0	0	0	0.0942325	0	0	3.74245	1.90398	0.452415	#N/A
hsa-miR-1225-5p	0	0	0	0.0942325	0	0	3.74245	1.90398	0.452415	#N/A
hsa-miR-2392	0	0	0	0.0942325	0	0	3.74245	1.90398	0.452706	#N/A
hsa-miR-205-5p	0	0	0	0.0942325	0	0	3.74245	1.90398	0.452623	#N/A
hsa-miR-4429	0	0	0	0	0.0517811	0	3.74182	1.90374	0.452482	#N/A
hsa-miR-603	0	0	0	0	0.0517811	0	3.74182	1.90374	0.452482	#N/A
hsa-miR-4634	0	0	0	0	0.0517811	0	3.74182	1.90374	0.452482	#N/A
hsa-miR-4433b-5p	0	0	0	0	0	0.0451707	3.74162	1.90366	0.452504	#N/A
hsa-miR-762	0	0	0	0	0	0.0451707	3.74162	1.90366	0.452504	#N/A
hsa-miR-18b-5p	0	0	0	0	0	0.0451707	3.74162	1.90366	0.452504	#N/A
hsa-miR-572	0.0408646	0	0	0	0	0	-3.66609	-1.87424	0.506644	#N/A
hsa-miR-5702	0.0408646	0	0	0	0	0	-3.66609	-1.87424	0.506644	#N/A
hsa-miR-520c-3p	0	0	0.050178	0	0	0	-3.66635	-1.87435	0.506618	#N/A
hsa-miR-6813-3p	0	0	0.050178	0	0	0	-3.66635	-1.87435	0.506618	#N/A
hsa-miR-4707-3p	0	0	0.050178	0	0	0	-3.66635	-1.87435	0.506618	#N/A
hsa-miR-365a-5p	0	0	0.050178	0	0	0	-3.66635	-1.87435	0.506618	#N/A
hsa-miR-548d-3p	0	0	0.050178	0	0	0	-3.66635	-1.87435	0.506618	#N/A
hsa-miR-4661-3p	0	0	0.050178	0	0	0	-3.66635	-1.87435	0.506618	#N/A
hsa-miR-1976	0	0	0.050178	0	0	0	-3.66635	-1.87435	0.506618	#N/A
hsa-miR-4750-3p	0	0	0.050178	0	0	0	-3.66635	-1.87435	0.506618	#N/A
hsa-miR-1909-3p	0	0	0.050178	0	0	0	-3.66635	-1.87435	0.506618	#N/A
hsa-miR-1538	0	0	0.050178	0	0	0	-3.66635	-1.87435	0.506618	#N/A
hsa-miR-4741	0	0	0.050178	0	0	0	-3.66635	-1.87435	0.506618	#N/A
hsa-miR-5583-3p	0	0	0.050178	0	0	0	-3.66635	-1.87435	0.506618	#N/A
hsa-miR-6529-5p	0	0	0.050178	0	0	0	-3.66635	-1.87435	0.506618	#N/A
hsa-miR-4502	0	0	0.050178	0	0	0	-3.66635	-1.87435	0.506618	#N/A
hsa-miR-885-5p	0	0	0.050178	0	0	0	-3.66635	-1.87435	0.506618	#N/A
hsa-miR-6793-3p	0	0	0.050178	0	0	0	-3.66635	-1.87435	0.506618	#N/A
hsa-miR-6767-5p	0	0	0.050178	0	0	0	-3.66635	-1.87435	0.506618	#N/A
hsa-miR-4749-5p	0	0	0.050178	0	0	0	-3.66635	-1.87435	0.506618	#N/A
hsa-miR-3136-3p	0	0	0.050178	0	0	0	-3.66635	-1.87435	0.506618	#N/A
hsa-miR-6508-3p	0	0	0.050178	0	0	0	-3.66635	-1.87435	0.506618	#N/A
hsa-miR-182-3p	0	0	0.050178	0	0	0	-3.66635	-1.87435	0.506618	#N/A
hsa-miR-3124-5p	0	0	0.050178	0	0	0	-3.66635	-1.87435	0.506618	#N/A
hsa-miR-153-3p	0	0	0.050178	0	0	0	-3.66635	-1.87435	0.506618	#N/A
hsa-miR-3613-3p	0	0	0.100356	0	0	0	-6.2581	-2.64572	0.341087	#N/A
hsa-miR-1270	0	0	0.100356	0	0	0	-6.2581	-2.64572	0.340329	#N/A
hsa-miR-7706	0	0	0.100356	0	0	0	-6.2581	-2.64572	0.343016	#N/A
hsa-miR-1343-5p	0	0	0.100356	0	0	0	-6.2581	-2.64572	0.345495	#N/A
hsa-miR-636	0	0	0.100356	0	0	0	-6.2581	-2.64572	0.348189	#N/A
hsa-miR-4659b-3p	0	0	0.100356	0	0	0	-6.2581	-2.64572	0.350975	#N/A

## Sheet: Sheet1
Name	HBMEC-static-1	HBMEC-static-2	HBMEC-static-3	HBMEC-flow-1	HBMEC-flow-2	HBMEC-flow-3	Fold change	Log fold change	P-value	FDR p-value
hsa-miR-34c-3p	2046.69	1950.21	2971.75	0.951397	5.08546	5.92538	-587.121	-9.19751	3.36972e-26	7.05619e-23
hsa-miR-411-5p	4.65585	9.70544	23.6761	702.524	11947.1	13278.2	681.919	9.41346	1.68967e-21	1.60468e-18
hsa-miR-369-5p	5.80913	9.70544	30.0607	1192.02	12966.1	11988.2	574.02	9.16496	2.29897e-21	1.60468e-18
hsa-miR-337-3p	5.63827	3.89688	9.84288	261.593	2202.63	2337.02	247.739	7.95268	1.27257e-18	6.66192e-16
hsa-miR-127-3p	110.63	220.946	706.116	19254	104212	106779	221.891	7.79371	6.32155e-18	2.64747e-15
hsa-miR-323a-3p	0.51257	1.24994	1.68482	35.1603	311.852	318.701	194.087	7.60056	6.3929e-17	2.23112e-14
hsa-miR-376a-3p	0.51257	2.20578	5.5865	56.3186	950.473	1308.36	279.257	8.12545	2.98179e-15	8.91981e-13
hsa-miR-300	0.0854284	0	0.886746	11.665	171.097	246.992	443.954	8.79427	6.16804e-15	1.4351e-12
hsa-miR-6769a-5p	335.52	450.2	617.796	3.16443	3.10778	6.46955	-111.072	-6.79536	5.90191e-15	1.4351e-12
hsa-miR-4793-3p	165.261	399.614	464.921	2.23371	4.91595	6.53001	-75.7833	-6.24381	1.15125e-14	2.41072e-12
hsa-miR-432-5p	2.56285	1.76463	3.36964	189.7	460.969	309.148	124.813	6.96363	1.2777e-14	2.43227e-12
hsa-miR-485-5p	4.65585	2.57341	1.59614	185.129	308.744	453.412	105.177	6.71668	4.09255e-14	7.14151e-12
hsa-miR-379-3p	0.854284	3.60278	1.68482	32.8439	480.972	443.859	155.777	7.28333	7.27387e-14	1.17165e-11
hsa-miR-197-3p	2.34928	2.57341	3.01494	146.226	240.373	301.469	87.1236	6.44499	9.81931e-14	1.46869e-11
hsa-miR-625-5p	1.28143	1.17642	0.709397	31.9545	126.176	190.338	107.849	6.75288	1.97057e-13	2.75091e-11
hsa-miR-3529-5p	8.37198	32.1309	37.6867	365.502	4147.87	3807.72	106.447	6.73399	9.72256e-13	1.27244e-10
hsa-miR-409-3p	5.16842	7.0585	8.95614	251.252	855.431	685.47	84.7979	6.40596	1.09425e-12	1.29799e-10
hsa-miR-431-5p	0.768855	4.19099	6.47325	119.276	524.593	577.362	107.201	6.74418	1.11575e-12	1.29799e-10
hsa-miR-323b-3p	1.02514	2.27931	0.620722	26.3909	194.152	215.853	110.298	6.78527	1.30904e-12	1.4427e-10
hsa-miR-382-5p	6.23627	2.20578	6.82795	185.75	561.661	485.881	80.5553	6.33191	1.96113e-12	2.0533e-10
hsa-miR-150-5p	1715.49	1483.02	1438.04	1.71665	17.4601	38.9382	-79.8497	-6.31922	7.50876e-12	7.48731e-10
hsa-miR-2467-3p	457.426	135.582	73.6886	7.32162	2.03418	1.08833	-63.2917	-5.98394	3.62878e-11	3.45394e-09
hsa-miR-154-3p	0	0	0.709397	7.42503	39.5536	43.8357	130.051	7.02294	4.71639e-11	4.29396e-09
hsa-miR-187-3p	76.7147	109.774	146.136	1.94416	3.16429	2.7813	-42.851	-5.42126	5.53895e-11	4.83273e-09
hsa-miR-6742-3p	2.00757	4.41157	2.57156	87.6526	111.146	112.159	35.0918	5.13306	7.94747e-11	6.6568e-09
hsa-miR-370-3p	2.52014	2.79399	2.66024	21.4685	169.572	325.533	64.5604	6.01258	2.06567e-10	1.66366e-08
hsa-miR-199a-3p	33.2316	12.3524	32.987	206.825	1856.36	2182.6	54.0101	5.75516	2.223e-10	1.72406e-08
hsa-miR-1910-3p	178.332	51.9829	15.1634	0.0206825	0.791072	1.75343	-96.3098	-6.58961	2.53373e-10	1.89487e-08
hsa-miR-335-5p	59.2446	204.844	113.77	0.103413	1.80816	3.68825	-67.8805	-6.08493	4.0024e-10	2.89001e-08
hsa-miR-935	1.45228	0.36763	0.620722	12.4509	26.2184	37.1243	29.4735	4.88135	7.5846e-10	5.29405e-08
hsa-miR-889-3p	2.94728	2.94104	2.48289	5.81179	236.248	367.494	72.5224	6.18036	1.06452e-09	7.19069e-08
hsa-miR-541-3p	3.33171	6.24972	5.40915	103.04	218.336	245.601	38.0061	5.24816	1.3213e-09	8.64627e-08
hsa-miR-2392	5.33927	2.94104	7.18264	176.774	228.676	169.055	37.2453	5.21899	1.52593e-09	9.68273e-08
hsa-miR-514a-3p	38.9126	34.7778	63.8457	0.930714	2.93827	0.725557	-30.2119	-4.91704	1.82444e-09	1.12364e-07
hsa-miR-487b-3p	11.6183	5.66151	12.7691	44.7777	701.624	837.171	52.6442	5.7182	2.56854e-09	1.53672e-07
hsa-miR-147b-3p	14.8218	32.3515	45.5788	1.55119	1.24311	1.75343	-20.275	-4.34163	3.23804e-09	1.88346e-07
hsa-miR-6747-5p	34.3849	25.293	43.5392	916.133	1465.97	607.472	28.9683	4.8564	8.29472e-09	4.69437e-07
hsa-miR-137-3p	1.53771	0.735261	3.36964	10.9204	84.3621	130.237	39.9619	5.32055	8.84635e-09	4.87481e-07
hsa-miR-495-3p	1.45228	0.220578	1.68482	4.65357	62.2686	92.8108	47.1187	5.55823	1.17063e-08	6.28539e-07
hsa-miR-345-5p	3.45985	4.48509	7.98072	27.4871	240.768	234.355	31.5841	4.98113	1.21154e-08	6.34243e-07
hsa-miR-493-3p	2.98999	3.16162	1.77349	27.9628	94.5896	116.996	29.9488	4.90443	2.18715e-08	1.11704e-06
hsa-miR-12135	2.47742	2.20578	3.72433	28.5005	120.356	114.759	31.3704	4.97133	2.69084e-08	1.34158e-06
hsa-miR-3158-3p	0.768855	0.441157	0.798072	11.8097	8.02373	17.4134	18.1181	4.17936	3.47449e-08	1.65354e-06
hsa-miR-654-3p	9.99512	8.38197	8.86746	61.1996	373.386	430.013	31.6836	4.98566	3.45673e-08	1.65354e-06
hsa-miR-376c-3p	5.1257	26.69	10.2863	45.1707	767.622	985.85	42.7113	5.41655	4.94364e-08	2.30044e-06
hsa-miR-3925-5p	1.02514	0.0735261	0.443373	11.4995	13.3917	21.4644	27.6093	4.78708	5.73402e-08	2.61023e-06
hsa-miR-455-3p	9.22626	10.6613	5.5865	48.3765	369.882	362.234	30.5744	4.93425	7.69898e-08	3.43014e-06
hsa-miR-138-5p	335.477	559.313	674.814	18.2006	19.8898	26.7247	-24.2505	-4.59994	8.09018e-08	3.52934e-06
hsa-miR-660-5p	2.52014	0.0735261	2.92626	11.8097	98.0364	114.336	40.3733	5.33533	8.95512e-08	3.82694e-06
hsa-miR-4325	83.0364	62.4236	168.482	2.02689	7.96722	3.02315	-24.2161	-4.59789	1.09465e-07	4.58438e-06
hsa-miR-340-3p	773.554	1111.79	1387.4	14.9535	62.9467	40.0265	-27.7769	-4.79581	1.14792e-07	4.71321e-06
hsa-miR-7845-5p	757.023	2.94104	3.01494	2.70941	2.2037	3.265	-93.1163	-6.54096	1.17967e-07	4.75042e-06
hsa-miR-4512	11.3193	21.249	56.9291	0.310238	2.31671	1.69297	-20.9135	-4.38636	1.24551e-07	4.92095e-06
hsa-miR-4282	2.05028	1.24994	4.16771	16.484	79.6722	58.1655	20.7091	4.3722	1.59634e-07	6.19026e-06
hsa-miR-3186-3p	32.4201	71.835	48.505	0.330921	0.452041	4.59519	-28.5983	-4.83786	1.63726e-07	6.23348e-06
hsa-miR-485-3p	2.60557	2.79399	7.18264	51.21	128.662	136.828	25.3272	4.66261	1.97764e-07	7.39495e-06
hsa-miR-337-5p	10.2087	10.3672	11.6164	26.6805	210.03	560.372	24.7396	4.62875	2.45483e-07	8.86277e-06
hsa-miR-6748-5p	100.506	155.581	203.242	11.7684	3.95536	3.80917	-23.294	-4.54189	2.44843e-07	8.86277e-06
hsa-miR-590-3p	1.36685	4.11746	2.12819	1.75802	71.366	156.962	30.1507	4.91412	3.08846e-07	1.09614e-05
hsa-miR-4641	23.7064	84.408	82.3787	0.847984	3.44681	5.74399	-19.0844	-4.25432	4.11349e-07	1.43561e-05
hsa-miR-369-3p	3.20356	2.49989	1.0641	3.99173	72.9481	117.601	28.4992	4.83285	4.86119e-07	1.66874e-05
hsa-miR-5690	21.1008	36.1013	47.7069	1.19959	1.0736	5.13936	-14.2602	-3.83392	5.48809e-07	1.85356e-05
hsa-miR-204-5p	100.635	73.5261	106.498	451.459	2590.08	2903.74	21.1807	4.40468	5.87505e-07	1.95276e-05
hsa-miR-652-3p	5354.69	6701.39	7404.77	68.3351	375.533	433.339	-22.1874	-4.47167	6.1409e-07	1.98882e-05
hsa-miR-6792-5p	2908.84	12.2789	24.1195	17.2286	13.5612	20.497	-57.4095	-5.84322	6.17352e-07	1.98882e-05
hsa-miR-4775	1.196	2.86752	1.95084	4.07446	33.451	77.8764	19.1501	4.25928	7.02654e-07	2.22933e-05
hsa-miR-555	1059.7	7.57319	4.52241	8.35575	4.12487	5.01843	-61.1643	-5.93462	9.4467e-07	2.95245e-05
hsa-miR-6514-5p	0.170857	0.441157	3.28096	9.57602	124.594	6.77186	36.2722	5.18079	1.18731e-06	3.65621e-05
hsa-miR-454-5p	0.640713	0.294104	0.620722	5.52224	8.58878	12.4554	16.3761	4.03352	1.44156e-06	4.37481e-05
hsa-miR-3909	64.9256	140.141	85.039	1.09617	9.32334	7.1951	-16.5314	-4.04714	1.48794e-06	4.45105e-05
hsa-miR-494-3p	0.384428	0.735261	0.532048	0.124095	27.5745	31.3199	35.2353	5.13895	1.51619e-06	4.4717e-05
hsa-miR-6869-3p	1.794	0.220578	0.886746	12.8025	15.9909	15.7809	14.5497	3.86292	1.57073e-06	4.56822e-05
hsa-miR-16-2-3p	43.9102	63.5265	115.1	4.0331	6.44158	3.9301	-15.4684	-3.95125	2.18789e-06	6.27594e-05
hsa-miR-1251-5p	36.9905	78.3788	49.5691	1.94416	4.63342	6.46955	-12.7563	-3.67314	2.46877e-06	6.98594e-05
hsa-miR-1307-3p	11.4474	16.3228	7.89204	70.5895	297.838	221.658	16.5213	4.04625	2.79938e-06	7.81587e-05
hsa-miR-6759-5p	8.07298	2.13226	3.63566	63.2472	83.5711	103.694	17.8487	4.15775	2.94573e-06	8.11627e-05
hsa-miR-6821-3p	25.2868	28.8222	18.267	1.24095	1.52564	3.38593	-12.0514	-3.59113	3.01119e-06	8.18888e-05
hsa-miR-576-5p	1.92214	2.20578	3.10361	10.879	59.2174	56.4725	17.5084	4.12998	3.14363e-06	8.43943e-05
hsa-miR-122b-3p	1.70857	1.47052	2.21687	2.27508	25.2578	57.3794	15.6651	3.96948	3.9509e-06	0.000104724
hsa-miR-4521	2.52014	6.69087	4.07903	27.4251	92.0468	73.2812	14.5307	3.86103	4.188e-06	0.000109621
hsa-miR-6835-3p	26.9099	43.8215	14.8973	1.88211	4.68992	2.96269	-9.05602	-3.17888	5.01421e-06	0.000129627
hsa-miR-3612	11.362	12.72	2.57156	0.682524	0.0565051	0.120926	-28.1034	-4.81267	5.88645e-06	0.00015032
hsa-miR-328-3p	1169.13	1043.78	1431.47	41.0755	122.616	115.182	-13.076	-3.70884	6.42119e-06	0.000162
hsa-miR-4750-3p	36.6488	38.0865	46.0221	3.59876	2.37321	6.0463	-10.1012	-3.33646	7.11227e-06	0.000177299
hsa-miR-6846-3p	41.1338	60.2914	60.0327	7.07343	3.39031	1.51158	-13.2851	-3.73174	7.69773e-06	0.000189636
hsa-miR-183-5p	42.885	442.48	204.838	6.515	15.1999	17.1715	-17.7609	-4.15063	8.62726e-06	0.000210064
hsa-miR-6873-5p	1008.57	2.20578	0.798072	8.33506	4.4074	5.13936	-56.5013	-5.82021	9.87685e-06	0.000237726
hsa-miR-625-3p	0	1.83815	2.39421	5.10859	28.4786	66.9931	23.7597	4.57045	1.25852e-05	0.00029704
hsa-miR-149-5p	23.7918	72.9379	105.079	244.84	1298.54	1315.62	14.1696	3.82473	1.26249e-05	0.00029704
hsa-miR-4742-5p	0.0854284	0.0735261	0	3.0817	3.44681	1.39065	38.0456	5.24966	1.35669e-05	0.000315657
hsa-miR-6757-5p	0.683427	0	0.266024	6.53568	7.11964	4.95797	16.0282	4.00254	1.37931e-05	0.000317394
hsa-miR-6731-3p	16.6158	13.97	16.1388	0.889349	0.395536	2.47898	-12.5949	-3.65477	1.39727e-05	0.00031803
hsa-miR-135a-5p	74.7925	116.098	70.4963	6.26681	5.31148	11.0647	-11.5895	-3.53475	1.56407e-05	0.000352167
hsa-miR-4633-3p	0.128143	0.147052	0.0886746	3.70218	2.88176	2.2976	23.0116	4.52429	1.7112e-05	0.000381197
hsa-miR-1185-5p	1.62314	7.0585	0.620722	4.8604	79.9547	90.0899	18.7464	4.22854	2.42701e-05	0.000534965
hsa-miR-939-3p	29.7718	52.3506	57.7272	6.34954	2.99477	4.89751	-9.70287	-3.27841	2.50513e-05	0.000546431
hsa-miR-6895-3p	24.8597	25.5136	61.6289	3.49535	6.38508	0.362778	-10.9069	-3.44717	2.90645e-05	0.000627433
hsa-miR-34b-3p	15.7615	18.8227	44.692	1.94416	1.92117	5.13936	-8.84781	-3.14532	3.10747e-05	0.000663984
hsa-miR-1227-3p	0.341713	2.42636	0.886746	12.0372	7.57169	20.9202	11.1587	3.4801	3.26411e-05	0.00069041
hsa-miR-412-5p	1.92214	0.441157	3.36964	2.97829	26.8964	36.5801	11.5593	3.53099	3.33384e-05	0.000698105
hsa-miR-3659	0.726141	0.0735261	0.354698	8.12824	7.7412	2.66037	14.839	3.89132	3.6193e-05	0.000746875
hsa-miR-323b-5p	5.38199	6.02914	5.05445	24.4468	69.5578	81.3228	10.617	3.40831	3.63807e-05	0.000746875
hsa-miR-656-3p	1.06785	1.10289	2.21687	1.67529	20.6244	42.5055	14.7401	3.88167	3.78025e-05	0.000754045
hsa-miR-1249-5p	14.9927	8.1614	33.6077	2.91624	0.621556	0.181389	-14.8805	-3.89535	3.79329e-05	0.000754045
hsa-miR-409-5p	2.09299	0.36763	0.443373	6.88729	18.6467	10.8833	11.9439	3.5782	3.7336e-05	0.000754045
hsa-miR-433-3p	3.07542	1.47052	4.61108	27.7767	35.0897	24.4271	9.5788	3.25985	3.81704e-05	0.000754045
hsa-miR-498-3p	11.1057	18.8227	6.6506	0.144778	1.29962	1.1488	-14.4545	-3.85345	4.09124e-05	0.00080066
hsa-miR-301a-5p	43.0559	81.761	74.398	5.52224	3.84235	9.06946	-10.8245	-3.43622	4.34348e-05	0.000842153
hsa-miR-5004-5p	12.0881	4.33804	3.81301	0.206825	0.0565051	0.967409	-16.8571	-4.07529	4.7776e-05	0.000917826
hsa-miR-106a-5p	2243.31	3483.67	3395.53	60.8274	337.562	367.132	-11.9181	-3.57509	4.94805e-05	0.000933443
hsa-miR-1249-3p	19.5204	38.7482	47.2636	3.37125	5.36799	4.89751	-7.77567	-2.95897	4.92567e-05	0.000933443
hsa-miR-7855-5p	39.8523	30.4398	24.5629	123.723	512.614	513.452	12.1092	3.59804	5.14918e-05	0.000962712
hsa-miR-652-5p	10.3368	12.6465	26.7797	2.31644	1.24311	0.483704	-11.9242	-3.57582	5.65625e-05	0.00104816
hsa-miR-1827	833.653	507.918	367.734	26.06	83.5146	33.2547	-11.9738	-3.58181	5.81865e-05	0.00106879
hsa-miR-340-5p	75.6895	153.228	266.467	2.39918	5.08546	27.4502	-14.1964	-3.82745	6.11403e-05	0.00111328
hsa-miR-136-5p	2.64828	2.86752	3.90168	3.39194	29.7217	66.2675	10.5315	3.39664	6.37484e-05	0.00115077
hsa-miR-493-5p	7.13327	2.05873	0.709397	6.76319	53.3973	69.9557	13.0136	3.70195	6.48039e-05	0.00115982
hsa-miR-505-3p	5.21113	4.19099	1.15277	15.6774	46.7297	59.3142	11.4073	3.51189	6.60122e-05	0.00117144
hsa-miR-4705	0.939712	4.41157	4.69975	0.0413651	0.0565051	0.181389	-38.5212	-5.26758	7.04577e-05	0.00123982
hsa-let-7d-3p	538.925	965.986	1755.23	38.3868	115.27	120.261	-11.9051	-3.57351	8.63743e-05	0.00150723
hsa-miR-941	11.8318	5.44093	13.7446	40.4964	162.735	154.846	11.5313	3.52748	9.03045e-05	0.00156279
hsa-miR-12113	14.6083	23.7489	24.5629	2.7301	2.48623	3.265	-7.40153	-2.88782	0.000141076	0.00242141
hsa-miR-200a-5p	0.640713	0.514683	2.03952	22.2751	3.10778	7.43695	10.3737	3.37486	0.000149898	0.00255193
hsa-miR-25-5p	19.5631	49.7772	47.973	5.27405	6.38508	4.83704	-7.09813	-2.82744	0.000157284	0.00265608
hsa-miR-134-5p	9.09812	3.23515	5.85252	14.2296	118.661	62.3979	10.6942	3.41876	0.000166234	0.00278475
hsa-miR-4725-5p	292.165	4.19099	11.8824	4.23992	6.78061	7.61834	-16.5358	-4.04752	0.000203064	0.00337473
hsa-miR-6803-3p	25.2868	37.1307	77.8563	6.18408	6.38508	6.16723	-7.47118	-2.90134	0.000209967	0.00346198
hsa-miR-628-3p	0.469856	3.23515	2.83759	6.34954	24.0712	18.5017	7.51893	2.91053	0.000213419	0.00349141
hsa-miR-146a-5p	825.665	1795.8	1439.37	11.1686	104.252	262.531	-10.7456	-3.42567	0.000233265	0.00378649
hsa-miR-3126-5p	184.782	8.67608	2.83759	4.71562	2.88176	5.86492	-14.5688	-3.86481	0.000235578	0.00379461
hsa-miR-3189-5p	1.40957	4.41157	3.90168	18.6557	20.6244	33.6175	7.58088	2.92237	0.000245482	0.00392396
hsa-miR-487a-5p	10.6785	9.19076	19.065	68.8936	107.473	106.052	7.27774	2.86349	0.000264568	0.00419701
hsa-miR-887-3p	4.5277	0.294104	7.62602	20.1034	45.0911	51.3331	9.34994	3.22496	0.000267055	0.00420461
hsa-miR-4755-3p	2.56285	12.573	2.66024	0.268873	0.791072	0.181389	-14.4039	-3.84839	0.000298006	0.0046569
hsa-miR-4632-3p	9.52526	10.0731	7.53734	0.847984	1.58214	1.02787	-8.52414	-3.09155	0.000307076	0.00476309
hsa-miR-12136	5.76641	1.32347	11.6164	33.2162	87.3569	43.6543	8.78303	3.13472	0.00035882	0.00552478
hsa-miR-877-3p	43.1413	51.9829	44.5147	7.03206	6.38508	6.83232	-6.81277	-2.76824	0.000407416	0.00622722
hsa-miR-5188	2.05028	0.661735	1.59614	7.818	10.3969	12.1531	6.7719	2.75956	0.000421046	0.00638892
hsa-miR-3613-3p	0.0427142	0.0735261	0.620722	3.92968	1.0736	3.38593	12.1537	3.60332	0.000453353	0.00682965
hsa-miR-6853-3p	1.23871	0.441157	5.76385	92.6992	5.481	4.71612	13.83	3.78973	0.00048671	0.00724631
hsa-miR-4684-5p	3.97242	2.27931	56.7518	2.27508	0	1.51158	-16.4965	-4.04409	0.000487932	0.00724631
hsa-miR-151a-3p	1110.31	1967.85	1358.94	19.0073	185.45	295.664	-8.87305	-3.14943	0.000498444	0.00735029
hsa-miR-598-3p	0.0427142	0	1.59614	1.71665	12.2051	12.6368	16.2775	4.02481	0.000531273	0.00777962
hsa-miR-4428	4.2287	3.23515	0.620722	3.95037	72.7786	5.98584	10.1557	3.34421	0.000546529	0.00793255
hsa-miR-6131	75.9458	178.227	62.693	648.543	679.248	1040.39	7.47338	2.90176	0.000549293	0.00793255
hsa-miR-548as-3p	0.683427	1.02937	0.177349	7.19753	2.48623	6.7114	8.40239	3.0708	0.000554251	0.00794933
hsa-miR-299-3p	1.32414	0.147052	2.30554	4.75698	10.3969	18.5622	8.8971	3.15334	0.000569327	0.00811001
hsa-miR-6798-3p	1.70857	0.0735261	0.266024	6.10135	3.55982	10.7624	9.4635	3.24237	0.000636086	0.00899975
hsa-miR-105-3p	1.15328	4.55862	1.68482	16.7942	15.3694	11.9717	6.0095	2.58725	0.000644766	0.00906134
hsa-miR-365a-5p	9.01269	18.5286	58.7913	2.1303	4.52041	7.07418	-6.30273	-2.65598	0.000656577	0.00908424
hsa-miR-377-3p	4.86942	1.47052	9.04481	1.88211	50.0635	105.327	10.2102	3.35194	0.00065941	0.00908424
hsa-miR-6818-3p	22.1687	17.5727	24.2968	4.28129	0.22602	4.89751	-6.78459	-2.76226	0.000659329	0.00908424
hsa-miR-200c-5p	5.38199	9.11724	15.0747	0.682524	1.1301	1.87435	-8.18066	-3.03222	0.000665141	0.00910331
hsa-miR-1180-3p	5.25384	12.3524	68.2795	167.756	309.931	342.523	9.55593	3.2564	0.0006726	0.00914561
hsa-miR-1226-3p	0.854284	3.23515	2.66024	8.66599	21.585	9.61362	5.95869	2.57499	0.00070709	0.00955256
hsa-miR-299-5p	0.170857	0.0735261	2.21687	1.36505	11.075	19.4086	12.9967	3.70008	0.000726382	0.00975028
hsa-miR-6791-3p	29.3019	31.6897	38.2188	8.10756	6.15906	4.05102	-5.31513	-2.41011	0.000752548	0.0100372
hsa-miR-549a-3p	2.64828	0.220578	26.5137	1.303	0.621556	0.120926	-14.0829	-3.81587	0.00076188	0.0100973
hsa-miR-3117-5p	0.256285	3.3822	1.41879	0.0620476	0.0565051	0	-34.1955	-5.09573	0.000767702	0.0101105
hsa-miR-1910-5p	2.64828	0.0735261	1.68482	7.05275	12.8832	13.967	7.56837	2.91998	0.000815479	0.0106726
hsa-miR-3654	9.99512	17.4992	30.4154	6.1634	1.80816	2.53945	-5.43178	-2.44143	0.000823675	0.0107129
hsa-miR-12129	0.683427	1.83815	2.21687	8.39711	13.1092	6.77186	6.13235	2.61644	0.000831112	0.0107429
hsa-miR-6068	266.237	1.9852	5.85252	12.575	2.2037	2.96269	-15.4165	-3.94641	0.000841713	0.0108132
hsa-miR-495-5p	7.26141	3.82336	6.11855	13.878	60.969	51.3936	7.30561	2.869	0.000881979	0.0112003
hsa-miR-6784-5p	13.5831	4.7792	7.89204	28.9349	104.421	63.9094	7.47784	2.90262	0.000882542	0.0112003
hsa-miR-450a-5p	301.135	264.988	443.196	7.44572	44.5825	69.9557	-8.2792	-3.04949	0.000893529	0.0112714
hsa-miR-1307-5p	2.56285	1.91168	1.24144	2.75078	17.1211	26.8456	8.0676	3.01214	0.000911382	0.0113597
hsa-miR-3920	1.196	0.147052	0.886746	6.43227	7.57169	3.50686	7.55248	2.91695	0.000906017	0.0113597
hsa-miR-548av-5p	5.46742	7.42614	2.30554	4.28129	44.2435	57.4399	6.94625	2.79623	0.000928502	0.0114002
hsa-miR-12118	3.41713	4.7792	0.798072	7.05275	106.286	0.423241	12.5935	3.65461	0.00093111	0.0114002
hsa-miR-501-3p	24.5179	43.6745	22.346	3.39194	7.40217	4.65565	-5.90083	-2.56092	0.000936408	0.0114002
hsa-miR-1302	6.6207	0.294104	2.21687	0.16546	0.169515	0.241852	-15.7716	-3.97926	0.000931412	0.0114002
hsa-miR-668-3p	2.94728	0	0.177349	1.90279	22.3195	15.2972	12.362	3.62784	0.000954491	0.0115532
hsa-miR-194-5p	94.3983	38.6012	75.1961	0.765254	10.2274	16.7483	-7.5183	-2.91041	0.00103497	0.0124554
hsa-miR-3942-3p	1.96485	1.91168	0.532048	13.3816	4.52041	5.86492	5.29497	2.40462	0.00107398	0.0128509
hsa-miR-513b-5p	1.40957	1.02937	0.266024	8.45916	5.82003	3.02315	6.13333	2.61667	0.00113416	0.0134939
hsa-miR-4790-3p	1.62314	0.808787	2.66024	13.5677	9.15383	6.16723	5.73655	2.52018	0.00114471	0.0135425
hsa-miR-5697	1.58042	8.67608	5.67518	3.49535	157.31	6.40908	10.4875	3.39059	0.00129287	0.0152093
hsa-miR-199a-5p	2.56285	2.86752	2.21687	3.82627	20.1158	21.5248	5.9046	2.56184	0.00131665	0.0152871
hsa-miR-20a-3p	4.8267	8.30845	5.05445	0.103413	0.11301	1.45111	-11.1763	-3.48237	0.00131512	0.0152871
hsa-miR-10396a-5p	142.196	260.65	179.477	23.8056	30.0042	48.5518	-5.69646	-2.51006	0.00132137	0.0152871
hsa-miR-875-3p	1.83671	1.76463	2.66024	13.03	11.075	9.43224	5.55599	2.47404	0.00132943	0.0152958
hsa-miR-942-5p	1.23871	3.97041	5.40915	11.5615	21.0199	33.3151	6.24824	2.64345	0.00134534	0.0153942
hsa-miR-514a-5p	807.127	6.32324	13.0352	20.1655	14.6348	30.7757	-12.6019	-3.65557	0.00137551	0.0156539
hsa-miR-4286	9.78155	5.3674	11.705	141.779	30.3432	30.7757	7.55425	2.91729	0.00143398	0.0162311
hsa-miR-3605-3p	5.04027	7.13203	4.96578	28.3764	26.3314	39.2405	5.48352	2.4551	0.0014553	0.0163839
hsa-miR-3177-3p	289.218	6.91145	15.9614	8.62462	5.31148	16.6878	-10.1908	-3.3492	0.00150775	0.0168836
hsa-miR-191-3p	2.39199	0.0735261	5.76385	6.53568	25.0318	33.6779	7.91942	2.9854	0.00155958	0.017371
hsa-miR-101-3p	11.661	33.0132	38.9282	0.641159	7.00663	5.13936	-6.56086	-2.71388	0.0017978	0.0198137
hsa-miR-4667-3p	26.7391	45.8068	71.8264	10.879	4.4639	8.46483	-6.03138	-2.59249	0.00179	0.0198137
hsa-miR-6890-3p	27.5934	85.8049	93.2857	5.64633	12.4876	16.0227	-6.06195	-2.59978	0.00184431	0.0202198
hsa-miR-138-1-3p	12.6861	41.6893	1.95084	2.23371	0.169515	3.74871	-9.13622	-3.1916	0.00192691	0.0210154
hsa-miR-380-3p	2.00757	0.955839	0.266024	2.31644	10.6795	12.3949	7.5995	2.9259	0.00195612	0.021114
hsa-miR-4501	0.341713	0.36763	0.177349	4.13651	0.847577	2.47898	8.08497	3.01524	0.00194679	0.021114
hsa-miR-8066	1.28143	3.01457	2.74891	11.6029	17.9121	5.80445	5.06416	2.34032	0.00199488	0.0214219
hsa-miR-648	6.74884	3.97041	7.53734	1.13754	0.169515	1.08833	-7.38348	-2.8843	0.00201994	0.0215804
hsa-miR-6510-5p	160.947	15.8816	11.0843	5.66702	7.96722	11.3066	-7.53962	-2.91449	0.00203379	0.021618
hsa-miR-147b-5p	34.6839	50.0713	15.3407	4.13651	8.13674	6.10677	-5.46963	-2.45144	0.00209489	0.022155
hsa-miR-4433a-3p	6.10813	9.70544	0.443373	2.62668	160.079	9.61362	10.5728	3.40229	0.00227105	0.0238974
hsa-miR-5010-3p	5.85184	6.4703	0.975421	20.0414	29.4392	36.4592	6.40841	2.67997	0.00234726	0.0245758
hsa-miR-149-3p	9.09812	24.4842	9.22216	3.39194	2.65574	2.23713	-5.11515	-2.35478	0.0023723	0.0247144
hsa-miR-466	7.34684	23.7489	7.27132	2.39918	2.42972	1.26972	-6.23622	-2.64067	0.00242705	0.0251596
hsa-miR-1304-3p	7.98755	7.94082	4.96578	11.9959	46.8427	73.1603	6.29413	2.65401	0.00244967	0.025269
hsa-miR-3146	1.75128	11.8377	3.63566	0.744572	0.904082	0.302315	-8.67521	-3.1169	0.00249835	0.0256449
hsa-miR-7846-3p	0.341713	0.294104	0.798072	4.17787	0.847577	5.86492	7.67032	2.93929	0.00276084	0.0279116
hsa-miR-4712-5p	0.427142	0.294104	0.709397	2.79214	3.84235	3.62778	7.10385	2.8286	0.00275478	0.0279116
hsa-miR-6840-5p	3.67342	0.441157	1.86217	6.28749	19.2117	9.37177	5.73461	2.5197	0.00275223	0.0279116
hsa-miR-3145-3p	0.683427	0.147052	0.177349	4.28129	1.63865	2.17667	7.21763	2.85153	0.00279782	0.0279116
hsa-miR-4450	6.6207	5.58798	12.7691	78.573	45.5431	30.6548	6.22091	2.63712	0.00279765	0.0279116
hsa-miR-222-5p	12.1308	23.4548	26.6024	4.67425	2.2037	7.01371	-4.46837	-2.15975	0.00279916	0.0279116
hsa-miR-218-2-3p	194.435	181.904	266.379	32.3061	41.5313	51.4541	-5.1392	-2.36154	0.00281975	0.0279837
hsa-miR-9900	42.5006	85.8785	130.618	15.6774	22.602	4.83704	-6.00018	-2.585	0.00284917	0.0281422
hsa-miR-609	157.53	0.147052	5.14313	4.90176	0.960587	7.8602	-11.8553	-3.56746	0.00287315	0.0282459
hsa-miR-29a-5p	33.4452	44.6303	34.6718	3.0817	5.93304	13.7856	-4.97086	-2.3135	0.00290206	0.0283967
hsa-miR-130b-5p	30.7969	2.79399	10.8183	31.272	140.867	148.255	7.19849	2.8477	0.00293144	0.0285508
hsa-miR-548aa	1.15328	0.36763	0.443373	6.39091	2.88176	3.62778	6.15562	2.62191	0.00301403	0.0291427
hsa-miR-3151-3p	5.25384	4.48509	4.16771	7.73527	48.2554	20.3156	5.46177	2.44937	0.00302004	0.0291427
hsa-miR-4731-3p	0.768855	0.294104	0.266024	4.42606	2.54273	3.68825	7.14888	2.83772	0.00306425	0.0294337
hsa-miR-216a-5p	1.58042	0.147052	6.11855	7.05275	14.0133	24.9712	5.87468	2.55451	0.00321392	0.0307304
hsa-miR-4270	2.77642	4.04393	0.798072	3.76422	49.2725	1.57204	7.12795	2.83349	0.00331388	0.0313994
hsa-miR-1915-5p	17.8118	33.6014	32.7209	2.23371	8.53227	8.22297	-4.45405	-2.15512	0.00330629	0.0313994
hsa-miR-4718	14.7364	18.0874	43.9826	23.4954	303.432	141.181	6.09543	2.60773	0.0034028	0.0320967
hsa-miR-4460	6.9197	7.86729	8.15807	90.1759	19.8333	24.6689	5.87392	2.55432	0.0034341	0.0322466
hsa-miR-323a-5p	7.64584	10.0731	4.8771	38.3041	55.9966	25.7573	5.29301	2.40409	0.00355279	0.0332122
hsa-miR-216b-3p	1.11057	0.0735261	1.95084	0	0	0.120926	-28.0983	-4.81241	0.00357083	0.0332325
hsa-miR-140-3p	23.3219	19.1903	11.5277	1.09617	6.72411	0.362778	-6.62037	-2.72691	0.00364075	0.0337333
hsa-miR-33a-5p	92.3908	223.813	296.351	16.7529	25.2013	69.9557	-5.47633	-2.45321	0.00372106	0.0343256
hsa-miR-675-3p	15.6334	13.4553	15.8728	5.12927	2.65574	0.846483	-5.11829	-2.35566	0.00376648	0.0345921
hsa-miR-12132	1.36685	0.220578	0.443373	5.3361	4.4639	3.86963	6.15866	2.62262	0.00379843	0.0347332
hsa-miR-6802-5p	1.87942	2.27931	0.798072	14.726	5.36799	5.62306	5.13644	2.36077	0.00389513	0.0354626
hsa-miR-7975	2.77642	5.51446	2.39421	10.5067	33.7336	7.1951	4.80138	2.26345	0.00395147	0.0358198
hsa-miR-362-5p	2.77642	4.70567	4.43373	7.42503	24.5232	26.8456	4.93683	2.30359	0.00403943	0.0364593
hsa-miR-3675-3p	2.17842	3.23515	3.90168	0.0413651	0.734567	0.120926	-10.8646	-3.44156	0.00423501	0.0378979
hsa-miR-190a-5p	14.5655	19.705	15.9614	5.81179	3.67283	2.84176	-3.96646	-1.98785	0.00422405	0.0378979
hsa-miR-1245a	3.03271	0.0735261	0.443373	8.23165	5.5375	10.4601	6.63188	2.72942	0.004446	0.0396167
hsa-miR-4788	0.0854284	0.147052	0.798072	4.69494	2.37321	0.725557	7.88207	2.97857	0.00447236	0.0396827
hsa-miR-26b-3p	30.1135	42.9392	19.5084	0.186143	5.02896	10.4601	-5.91854	-2.56524	0.00452659	0.039928
hsa-miR-182-5p	15.9751	147.346	57.1065	5.29473	5.70702	25.3945	-6.06031	-2.59939	0.00453814	0.039928
hsa-miR-6505-5p	74.7925	14.7787	25.0949	7.48708	5.19847	9.12992	-5.25977	-2.395	0.00458828	0.0402002
hsa-miR-661	20.9727	20.0726	41.411	7.69391	2.31671	6.95325	-4.83273	-2.27284	0.00460863	0.0402103
hsa-miR-3688-5p	1.28143	0.147052	0.177349	3.51603	3.2773	4.11149	6.15857	2.6226	0.00489185	0.0425043
hsa-miR-3667-5p	259.147	3.01457	15.8728	10.4654	5.82003	16.9297	-8.36982	-3.0652	0.00502873	0.0432163
hsa-miR-338-5p	12.4725	15.0728	17.5576	0.496381	5.19847	0	-7.9248	-2.98637	0.00503571	0.0432163
hsa-miR-3925-3p	8.96998	2.49989	1.0641	29.8242	16.217	15.6599	4.86918	2.28368	0.0049993	0.0432163
hsa-miR-325	451.361	21.5431	9.04481	29.2038	18.6467	18.5017	-7.26185	-2.86034	0.00509553	0.0435512
hsa-miR-10a-5p	12750.3	25011.1	28094.8	386.619	5010.59	5541.92	-6.02026	-2.58983	0.00514241	0.0437732
hsa-miR-4772-5p	14.1811	7.42614	2.03952	0.289556	2.09069	1.39065	-6.35997	-2.66902	0.00517689	0.0438883
hsa-miR-1292-3p	76.9282	2.05873	2.66024	7.52845	1.92117	0.906946	-7.85405	-2.97344	0.00520542	0.0439522
hsa-miR-4787-5p	7.34684	6.61735	0.443373	0.16546	0.339031	1.20926	-8.55185	-3.09624	0.00529407	0.0445212
hsa-miR-4324	98.5843	266.017	259.905	17.5181	36.5023	73.5835	-4.89677	-2.29183	0.00543093	0.0450523
hsa-miR-3160-3p	3.88699	8.30845	5.05445	54.4158	10.1709	31.3199	5.56731	2.47698	0.00543427	0.0450523
hsa-miR-6716-5p	1.06785	0.735261	0.443373	3.86764	2.65574	7.1951	5.77201	2.52907	0.00544328	0.0450523
hsa-miR-425-3p	53.8199	78.8935	61.8062	8.02483	23.2801	11.6089	-4.54521	-2.18435	0.00542849	0.0450523
hsa-miR-4675	3.24628	3.30867	2.30554	20.3309	11.9226	7.31603	4.45072	2.15404	0.00582325	0.0480075
hsa-miR-8065	1.15328	0.661735	0.798072	2.68873	5.14197	6.28816	5.13222	2.35958	0.00589966	0.0484466
hsa-miR-4761-5p	6.74884	14.7052	2.74891	10.7549	134.652	6.34862	6.26078	2.64634	0.00596223	0.0487692
hsa-miR-3127-5p	0.384428	4.33804	5.32048	0.124095	0.452041	0.483704	-9.6413	-3.26923	0.00641657	0.0522813
hsa-miR-10a-3p	44.9353	88.5254	83.8862	8.39711	19.3813	21.8876	-4.38662	-2.13311	0.00659582	0.0535335
hsa-miR-4765	2.64828	1.397	5.40915	13.5471	12.2616	12.1531	4.05993	2.02145	0.00693726	0.0560874
hsa-miR-521	28.4049	1.47052	0.0886746	2.44054	0.678061	0.181389	-8.98734	-3.16789	0.00696484	0.0560937
hsa-miR-181a-2-3p	4.01513	12.2053	17.6462	9.22441	70.9139	95.3502	5.18421	2.37412	0.0070281	0.0563864
hsa-miR-4432	1.75128	0.294104	0.532048	0.16546	13.1092	6.89279	7.63734	2.93307	0.00712992	0.0565532
hsa-miR-326	237.491	162.125	177.349	7.9421	41.8703	71.0441	-4.77752	-2.25626	0.00712733	0.0565532
hsa-miR-142-3p	4.86942	5.29388	8.06939	32.0166	39.8361	9.67409	4.48209	2.16417	0.0071146	0.0565532
hsa-miR-15b-3p	38.2719	82.9374	104.281	7.85937	20.9069	21.9481	-4.45318	-2.15484	0.00721524	0.057014
hsa-miR-4772-3p	3.97242	10.2937	13.1238	3.01965	1.01709	1.1488	-5.13855	-2.36136	0.0073039	0.0574976
hsa-miR-4707-5p	357.774	599.826	2673.89	117.932	243.876	341.737	-5.16183	-2.36788	0.00742591	0.0580219
hsa-miR-1470	22.6385	16.3228	24.5629	8.08687	3.78584	5.19982	-3.66599	-1.8742	0.00742373	0.0580219
hsa-miR-365a-3p	402.154	795.699	596.958	30.5274	87.5264	217.123	-5.35606	-2.42117	0.00774612	0.0602555
hsa-miR-125b-1-3p	290.542	565.489	653.177	56.877	99.223	145.776	-5.00107	-2.32224	0.00776933	0.0602555
hsa-miR-3936	0.298999	1.76463	0.620722	4.69494	8.92781	1.87435	5.79768	2.53547	0.00787052	0.060815
hsa-miR-5187-3p	1.62314	0.147052	0.266024	9.01759	2.2602	1.6325	6.08971	2.60637	0.0081307	0.0623651
hsa-miR-6778-3p	16.146	14.7052	8.69011	2.29576	4.68992	1.57204	-4.64997	-2.21722	0.0081119	0.0623651
hsa-miR-570-3p	42.5006	52.8653	5.14313	1.88211	12.7702	5.01843	-5.11886	-2.35582	0.00828143	0.0630593
hsa-miR-6715b-3p	2.43471	0.514683	0.620722	8.31438	4.85944	3.56732	4.51611	2.17508	0.00825546	0.0630593
hsa-miR-3155a	694.661	1164.8	1290.48	35.9256	264.5	300.441	-5.24293	-2.39037	0.00838181	0.0635925
hsa-miR-200b-3p	28.1486	29.3369	159.26	1.38573	10.962	25.2131	-5.77439	-2.52967	0.0085273	0.0642308
hsa-let-7a-3p	1080.03	2109.1	3560.46	38.2213	514.479	671.926	-5.51173	-2.4625	0.00851074	0.0642308
hsa-miR-3692-3p	3.11814	9.99955	4.25638	0.641159	1.69515	0.906946	-5.43122	-2.44128	0.00887815	0.0666338
hsa-miR-4540	2.81914	1.76463	0.354698	13.8159	2.88176	4.35334	4.19911	2.07008	0.00893234	0.0668011
hsa-miR-4758-3p	1.32414	0.0735261	1.86217	9.65875	4.18138	3.62778	5.34286	2.41761	0.0095436	0.0711185
hsa-miR-3670	9.01269	0.0735261	8.24674	1.13754	0.11301	1.1488	-7.15855	-2.83967	0.00958281	0.0711575
hsa-miR-7-5p	2386.4	17102.2	17827	754.851	3085.24	3408.85	-5.14775	-2.36394	0.00983585	0.0727783
hsa-miR-548p	0.298999	1.32347	0.177349	3.95037	2.82526	2.59991	5.24741	2.3916	0.00996427	0.073469
hsa-miR-4678	0.341713	3.3822	0.266024	0.0827302	0.11301	0.120926	-12.3703	-3.62881	0.0101605	0.0746528
hsa-miR-548a-5p	0.128143	3.0881	2.74891	4.07446	13.6742	12.6972	5.12036	2.35625	0.0106128	0.077433
hsa-miR-589-3p	0.0854284	0.294104	0.620722	2.9576	0.734567	2.66037	6.73144	2.75091	0.0106033	0.077433
hsa-miR-6886-5p	21.3144	8.4555	12.8578	4.01241	0.339031	4.71612	-4.68923	-2.22935	0.0106871	0.0775458
hsa-miR-30a-5p	14685	18985.8	11437.9	282.42	3694.3	4910.45	-5.07574	-2.34362	0.0107024	0.0775458
hsa-miR-6722-5p	1.83671	11.176	3.81301	1.50983	0	1.02787	-6.52093	-2.70508	0.010964	0.0791391
hsa-miR-3689a-5p	0.982426	0	0.886746	9.121	0.169515	3.74871	6.86329	2.7789	0.0109978	0.0791391
hsa-miR-6784-3p	10.4223	15.9552	7.53734	2.41986	2.09069	3.62778	-4.20148	-2.0709	0.0111861	0.0794026
hsa-miR-668-5p	16.3595	17.5727	15.6954	6.43227	4.06837	4.65565	-3.16332	-1.66144	0.0111759	0.0794026
hsa-miR-504-3p	0.640713	0.220578	0.443373	4.05378	1.80816	1.1488	5.19518	2.37717	0.0111374	0.0794026
hsa-miR-6851-3p	1.06785	0	1.24144	5.79111	4.29439	2.11621	5.22543	2.38555	0.0111351	0.0794026
hsa-miR-143-3p	21.2289	21.0285	25.4496	4.23992	4.91595	10.1578	-3.53611	-1.82216	0.01143	0.0808596
hsa-miR-7706	0.726141	0.588209	0.798072	3.72286	1.97768	5.01843	5.02287	2.32851	0.0115097	0.0811491
hsa-miR-7159-3p	2.26385	2.35283	0.443373	8.79008	8.8713	4.05102	4.2056	2.07231	0.0116026	0.0815297
hsa-let-7e-3p	475.793	840.624	1606.07	39.4416	267.495	255.88	-5.1931	-2.3766	0.0116685	0.0817183
hsa-miR-500a-5p	3.03271	4.63214	3.90168	7.4664	13.1657	19.59	3.47336	1.79633	0.0118849	0.0826837
hsa-miR-136-3p	3.03271	0.0735261	0.443373	1.63392	9.49286	11.3066	6.16556	2.62423	0.0119643	0.0826837
hsa-miR-4719	2.17842	3.45573	0.443373	0.0206825	0.508546	0	-11.7316	-3.55233	0.0119161	0.0826837
hsa-miR-380-5p	2.47742	0.147052	1.0641	4.71562	7.91072	5.32075	4.72256	2.23957	0.0119355	0.0826837
hsa-miR-4703-3p	14.0103	4.55862	4.25638	65.6464	24.3537	21.7667	4.87123	2.28429	0.0120426	0.0829512
hsa-miR-1265	3.37442	1.61757	7.0053	16.2772	18.8727	10.1578	3.79751	1.92505	0.0121925	0.0837082
hsa-miR-6796-3p	1.11057	1.32347	1.0641	5.50156	5.59401	3.265	4.1433	2.05078	0.0123824	0.0841187
hsa-miR-329-3p	20.7591	5.73503	14.0993	39.1934	72.7786	70.0162	4.46741	2.15944	0.0124129	0.0841187
hsa-miR-6715a-3p	0.427142	0.735261	3.63566	3.88832	9.32334	9.91594	4.87679	2.28593	0.012392	0.0841187
hsa-miR-6759-3p	0.427142	0.0735261	0.443373	4.81903	0.0565051	1.99528	7.08442	2.82465	0.0123583	0.0841187
hsa-miR-15a-5p	6618.31	10981.3	10297.9	271.562	1985.25	3316.76	-5.00538	-2.32348	0.0125487	0.0842452
hsa-miR-4267	1.45228	2.20578	4.16771	0.0413651	0.678061	0.181389	-9.05901	-3.17935	0.0125636	0.0842452
hsa-miR-6795-3p	9.18355	10.5142	25.627	4.50879	4.06837	3.20454	-3.81269	-1.93081	0.0125852	0.0842452
hsa-miR-4727-3p	6.10813	2.79399	4.16771	5.19132	57.6352	3.68825	5.0697	2.3419	0.0125925	0.0842452
hsa-miR-4662a-3p	2.26385	8.1614	2.57156	22.8749	25.3143	9.55316	4.44878	2.15341	0.0126376	0.0842772
hsa-miR-3152-5p	26.4401	2.49989	4.25638	26.3909	57.7482	80.3554	4.9366	2.30352	0.0127141	0.0845182
hsa-miR-6750-5p	58.134	33.1603	38.5735	16.1531	12.0356	5.62306	-3.82586	-1.93579	0.0128183	0.0849008
hsa-miR-10397-3p	2.05028	2.13226	1.50747	18.8625	1.75166	5.38121	4.55638	2.18789	0.0128527	0.0849008
hsa-miR-3182	4.95485	2.86752	4.78843	56.6288	2.93827	7.37649	5.30193	2.40652	0.0130824	0.0861462
hsa-miR-1276	7.13327	20.3667	4.25638	0.248191	3.55982	1.75343	-5.74899	-2.52331	0.0134622	0.0873329
hsa-miR-6513-3p	8.07298	4.92625	3.19229	39.8553	16.3865	16.2041	4.44219	2.15127	0.0134516	0.0873329
hsa-miR-4528	1.02514	1.6911	10.641	0.661841	0	1.02787	-7.80832	-2.96501	0.0133555	0.0873329
hsa-miR-5193	28.6185	56.1739	71.7378	22.3371	6.89362	9.12992	-4.0618	-2.02212	0.0134711	0.0873329
hsa-miR-30c-1-3p	41.091	84.3344	137.091	12.1613	22.4325	28.9618	-4.13389	-2.0475	0.0133228	0.0873329
hsa-miR-5003-3p	4.44227	1.76463	2.74891	22.2544	8.30625	6.22769	4.08068	2.02881	0.0136949	0.087826
hsa-miR-6819-3p	286.142	22.8666	16.8482	21.4478	17.1211	20.6784	-5.49997	-2.45942	0.0136737	0.087826
hsa-miR-12124	1.40957	0.441157	1.24144	12.9473	0.395536	1.93482	4.90657	2.29471	0.0136819	0.087826
hsa-miR-10401-3p	1.23871	1.24994	0.443373	5.72906	2.42972	4.05102	4.04554	2.01633	0.013715	0.087826
hsa-miR-1305	3.67342	0.0735261	3.45831	17.0631	5.98954	11.2461	4.73772	2.24419	0.0139329	0.0889494
hsa-miR-378g	14.6937	13.1612	25.0062	2.06825	7.34567	4.17195	-3.91689	-1.96971	0.0140755	0.0890455
hsa-miR-5100	3.84428	4.48509	2.74891	27.8801	7.91072	11.7903	4.28996	2.10097	0.0140377	0.0890455
hsa-miR-1238-5p	6.6207	14.8523	4.25638	3.37125	0.169515	1.69297	-4.85361	-2.27906	0.0140744	0.0890455
hsa-miR-6817-3p	4.35685	18.0874	14.0993	1.09617	4.85944	1.81389	-4.72337	-2.23982	0.0145907	0.0920272
hsa-miR-584-5p	40.2795	27.2782	42.3865	75.2224	202.853	143.781	3.83429	1.93896	0.0147443	0.0927165
hsa-miR-12130	3.28899	3.97041	6.02987	30.0311	8.70179	12.9996	3.91986	1.9708	0.0148925	0.0932102
hsa-miR-511-5p	15.9751	10.4407	24.4742	5.85316	5.76352	4.29288	-3.17694	-1.66764	0.0149118	0.0932102
hsa-miR-6838-3p	0.469856	0	4.8771	16.029	5.19847	6.77186	5.25072	2.39251	0.0152894	0.0947926
hsa-miR-5191	1.28143	2.27931	0.975421	6.88729	6.72411	4.35334	3.98123	1.99321	0.0153008	0.0947926
hsa-miR-4646-3p	26.4828	12.2053	2.48289	5.91521	2.76875	1.6325	-3.97364	-1.99046	0.0152694	0.0947926
hsa-miR-561-3p	14.2238	15.0728	8.77879	6.515	1.29962	0.302315	-4.63666	-2.21309	0.0156647	0.0955899
hsa-miR-6871-3p	1.23871	6.4703	3.99036	0.827302	0.282526	0.846483	-5.82908	-2.54327	0.015701	0.0955899
hsa-miR-4780	2.39199	0.514683	0.443373	5.17064	4.18138	5.26029	4.13571	2.04814	0.0157491	0.0955899
hsa-miR-3158-5p	5.16842	1.10289	9.13349	1.26164	1.0736	0.78602	-4.86833	-2.28343	0.0155478	0.0955899
hsa-miR-539-5p	2.69099	16.9845	4.96578	38.5523	36.6718	29.0827	4.23817	2.08344	0.0155511	0.0955899
hsa-miR-7151-3p	5.76641	4.55862	3.99036	1.11686	0	1.39065	-5.65303	-2.49902	0.015726	0.0955899
hsa-miR-572	10.0378	9.41134	8.51276	1.86143	1.75166	4.05102	-3.73988	-1.90299	0.0156632	0.0955899
hsa-miR-6126	9.14083	3.60278	8.60144	2.04757	1.97768	0.181389	-5.00698	-2.32394	0.0160129	0.0969105
hsa-miR-1909-3p	16.8294	0.661735	1.0641	1.90279	0.904082	0.302315	-5.90899	-2.56291	0.0161457	0.0974323
hsa-miR-4724-3p	6.44984	9.04371	5.2318	1.94416	2.03418	0.78602	-4.24535	-2.08588	0.0161926	0.0974346
hsa-miR-371b-3p	3.28899	20.2932	23.1441	3.95037	4.57691	2.84176	-4.09442	-2.03366	0.0164679	0.0976875
hsa-miR-3668	0.597999	1.83815	1.59614	10.031	3.3338	3.20454	4.19029	2.06705	0.0163626	0.0976875
hsa-miR-338-3p	10.764	5.88209	6.11855	3.68149	0.678061	0.060463	-5.06157	-2.33958	0.0164183	0.0976875
hsa-miR-6773-3p	223.908	286.164	195.616	15.1189	90.1257	74.7323	-3.92321	-1.97203	0.0164325	0.0976875
hsa-miR-542-3p	5.08299	14.2641	11.6164	4.63289	0.565051	2.11621	-4.1711	-2.06043	0.0164175	0.0976875
hsa-miR-5689	3.24628	0.661735	0.532048	7.54913	7.96722	2.7813	4.00547	2.00197	0.0167849	0.0992867
hsa-miR-7151-5p	0.726141	0.0735261	3.45831	11.0238	4.74643	4.71612	4.84474	2.27642	0.0168395	0.0993291
hsa-miR-5187-5p	8.96998	3.52925	1.15277	29.2451	30.7388	1.6325	4.48992	2.16669	0.0169371	0.0996244
hsa-miR-6840-3p	1.83671	0	0.266024	2.89556	5.42449	3.08362	5.18768	2.37509	0.0170181	0.0998206
hsa-miR-7978	4.65585	8.97018	11.439	57.4975	25.0318	21.3435	4.16527	2.05841	0.0172937	0.101154
hsa-miR-3680-5p	0.896998	0.36763	0.0886746	3.92968	2.76875	0.725557	5.13963	2.36166	0.0173915	0.101442
hsa-miR-1306-5p	23.4928	41.9099	96.5667	12.6164	15.8779	18.6831	-3.43228	-1.77917	0.0175628	0.102088
hsa-miR-3661	2.56285	0.220578	4.8771	10.8997	5.42449	13.3019	3.8678	1.95151	0.0175996	0.102088
hsa-miR-548l	0.896998	0.220578	0.620722	2.41986	5.59401	1.20926	5.09262	2.34841	0.0179313	0.102706
hsa-miR-6830-5p	14.8645	11.3965	0.532048	21.9855	109.111	10.581	5.27518	2.39922	0.0180495	0.102706
hsa-miR-5589-3p	4.86942	10.2937	0.443373	1.57187	1.18661	0.181389	-5.24054	-2.38972	0.017858	0.102706
hsa-miR-4633-5p	2.39199	2.05873	1.86217	8.83145	7.7412	4.65565	3.34096	1.74026	0.0180384	0.102706
hsa-miR-3157-5p	5.97999	3.30867	1.77349	8.12824	13.2787	15.5995	3.27556	1.71174	0.0178098	0.102706
hsa-miR-651-5p	3.03271	5.3674	6.73927	38.8005	9.04082	11.8508	3.96249	1.98641	0.0179967	0.102706
hsa-miR-607	4.78399	8.08787	7.71469	48.4385	14.8608	16.9901	3.9157	1.96927	0.0178618	0.102706
hsa-miR-410-3p	12.558	11.0289	50.7219	9.05895	150.643	230.546	5.25195	2.39285	0.0181727	0.103127
hsa-miR-6882-3p	4.91213	4.19099	9.75421	1.6546	0.339031	2.2976	-4.35897	-2.12399	0.0187654	0.106202
hsa-miR-578	6.74884	9.70544	6.38457	10.4654	23.2236	48.189	3.57645	1.83853	0.0192022	0.108381
hsa-miR-4742-3p	0.256285	0	0.532048	1.86143	2.42972	0.906946	6.68407	2.74073	0.0192899	0.108584
hsa-miR-96-3p	1.11057	0	0.532048	4.07446	1.80816	3.265	5.29964	2.40589	0.0200502	0.11256
hsa-miR-27a-5p	72.8277	157.566	238.623	9.7208	33.2815	64.2722	-4.37444	-2.1291	0.0202989	0.113652
hsa-miR-5197-3p	0.51257	0.0735261	2.03952	1.48914	4.18138	7.79973	5.15109	2.36488	0.0205711	0.114869
hsa-miR-577	0.170857	2.27931	1.68482	5.43951	5.70702	6.0463	4.21436	2.07531	0.0212504	0.118347
hsa-miR-5011-5p	0.298999	1.9852	0.354698	1.75802	2.54273	8.94853	4.99202	2.31962	0.0213098	0.118362
hsa-miR-127-5p	2.26385	0.220578	2.12819	4.05378	6.6676	7.67881	3.93388	1.97595	0.0216268	0.119806
hsa-miR-589-5p	1.62314	1.17642	0.354698	2.52327	5.36799	6.77186	4.4259	2.14597	0.0219501	0.121275
hsa-miR-4738-3p	4.10056	0.36763	2.48289	5.6877	6.89362	13.5437	3.70943	1.8912	0.0220535	0.121501
hsa-miR-891a-5p	3.75885	1.10289	1.33012	8.66599	11.8096	3.265	3.75805	1.90998	0.022223	0.121501
hsa-miR-4471	3.33171	5.58798	8.06939	2.06825	1.41263	0.725557	-3.87976	-1.95597	0.022281	0.121501
hsa-miR-644a	9.48255	7.64671	12.1484	31.1065	34.6941	40.2684	3.63338	1.86131	0.0222611	0.121501
hsa-miR-580-3p	2.00757	0.294104	2.66024	7.05275	3.78584	9.91594	4.16573	2.05857	0.0221732	0.121501
hsa-miR-29b-1-5p	23.9199	44.5568	54.5349	18.6143	9.8884	9.55316	-3.21322	-1.68402	0.0229281	0.124705
hsa-miR-6499-3p	35.7945	40.7335	61.0968	36.422	248.905	246.568	3.86447	1.95027	0.0230854	0.125235
hsa-miR-4522	363.199	7.27908	16.5822	17.4561	24.6362	37.0638	-4.89066	-2.29003	0.0233091	0.126122
hsa-miR-144-3p	2.81914	0.147052	29.174	1.50983	1.41263	2.53945	-5.87109	-2.55363	0.0235319	0.126999
hsa-miR-3960	4.44227	3.45573	9.04481	8.95554	13.7872	33.0128	3.29329	1.71953	0.0239744	0.129055
hsa-miR-7109-3p	9.73883	6.24972	11.2617	71.5823	23.9017	15.1158	4.06117	2.0219	0.0241917	0.129891
hsa-miR-4711-5p	2.47742	5.95561	2.48289	26.3909	10.3969	5.32075	3.8656	1.95069	0.0243218	0.130255
hsa-miR-6793-5p	2.47742	2.57341	2.39421	16.2358	3.2773	5.32075	3.34459	1.74183	0.024452	0.130619
hsa-miR-381-5p	2.22114	1.9852	1.41879	5.91521	4.97245	11.3671	3.86285	1.94966	0.024556	0.13084
hsa-miR-548at-5p	1.02514	1.32347	1.59614	5.00518	4.4074	4.53473	3.80753	1.92885	0.0248776	0.13155
hsa-miR-3675-5p	4.05785	3.45573	2.03952	1.19959	0.22602	0.302315	-5.12472	-2.35747	0.0247556	0.13155
hsa-miR-567	4.18599	5.29388	11.705	1.86143	2.2037	1.20926	-3.95917	-1.9852	0.0248179	0.13155
hsa-miR-3200-5p	0.51257	0.0735261	3.90168	9.74148	5.82003	3.62778	4.30611	2.10638	0.0252399	0.133129
hsa-miR-758-3p	17.8545	0.220578	1.59614	37.394	34.4681	24.0643	4.85548	2.27961	0.0255383	0.134365
hsa-miR-5585-5p	0.0854284	0.441157	0.709397	1.94416	1.86467	1.87435	5.62601	2.49211	0.0257786	0.135289
hsa-miR-1228-5p	14.5655	24.6312	3.81301	3.35057	3.61633	4.59519	-3.72789	-1.89836	0.0260485	0.136364
hsa-miR-3615	7.13327	1.24994	16.2275	10.4654	40.6837	44.3799	3.88101	1.95643	0.0278482	0.14506
hsa-miR-3613-5p	41.689	1.02937	5.67518	30.1965	110.015	93.8991	4.82834	2.27153	0.027802	0.14506
hsa-miR-584-3p	4.61313	11.9112	11.3504	0.351603	2.93827	3.20454	-4.32896	-2.11402	0.0281678	0.14636
hsa-miR-3610	1.70857	4.7792	7.0053	31.8718	5.87653	10.5206	3.59677	1.8467	0.02835	0.146943
hsa-miR-543	6.70613	15.8816	16.8482	18.3041	64.8679	52.4819	3.44316	1.78373	0.0287163	0.148474
hsa-miR-1237-3p	102.685	12.9406	18.7103	10.4447	11.2445	15.1762	-3.64777	-1.86701	0.0288115	0.148599
hsa-miR-11401	0.726141	2.20578	0.266024	3.74354	4.06837	5.38121	4.08536	2.03046	0.0289708	0.149054
hsa-miR-320e	18.1962	11.5436	11.0843	25.7291	89.7866	31.3199	3.58631	1.8425	0.0293287	0.150525
hsa-miR-3606-5p	0.768855	1.9852	0.443373	6.43227	4.97245	1.20926	3.93567	1.97661	0.0297442	0.152284
hsa-miR-664a-3p	34.0005	57.1298	82.9108	3.0817	21.698	21.8876	-3.73432	-1.90085	0.0299215	0.152818
hsa-miR-302a-3p	1.23871	0.220578	1.86217	5.00518	5.82003	2.47898	4.00622	2.00224	0.0301789	0.153596
hsa-miR-595	12.0881	11.7642	8.69011	34.5398	34.5811	41.8404	3.3522	1.74511	0.0302205	0.153596
hsa-miR-1343-3p	5.97999	2.79399	6.20722	25.7084	7.96722	19.4691	3.54449	1.82558	0.0308156	0.156242
hsa-miR-370-5p	4.61313	1.397	5.5865	14.4985	10.736	8.3439	2.89683	1.53448	0.0310839	0.157221
hsa-miR-6082	3.84428	2.64694	0.798072	15.1396	4.12487	6.46955	3.4901	1.80327	0.0312401	0.157223
hsa-miR-3120-3p	2.39199	0.0735261	1.95084	9.36919	12.7137	0.060463	4.97645	2.31512	0.0313986	0.157223
hsa-miR-554	35.2392	15.2934	25.893	10.817	8.24975	5.26029	-3.12819	-1.64533	0.0312492	0.157223
hsa-miR-8071	2.77642	0.294104	2.57156	2.19235	10.6795	10.8229	4.15828	2.05599	0.0315017	0.157223
hsa-miR-4444	2.26385	4.99977	0.354698	13.6298	7.34567	6.10677	3.53975	1.82365	0.0315278	0.157223
hsa-miR-3124-5p	4.10056	4.70567	3.45831	8.62462	28.1395	2.59991	3.19995	1.67805	0.0315348	0.157223
hsa-miR-1283	2.73371	1.24994	0.177349	0.103413	0.395536	0	-8.42364	-3.07444	0.0317349	0.157471
hsa-miR-6881-5p	8.75641	19.1168	18.1783	93.9608	39.2711	22.855	3.39594	1.76381	0.0316912	0.157471
hsa-miR-553	48.6087	6.32324	3.72433	3.37125	3.44681	8.46483	-3.84715	-1.94379	0.0321115	0.158399
hsa-miR-3201	12.6861	16.6169	19.9518	2.52327	4.74643	8.04159	-3.24536	-1.69838	0.0320428	0.158399
hsa-miR-1468-5p	3.88699	0.0735261	1.41879	4.3847	9.77539	8.58575	4.1607	2.05683	0.0321488	0.158399
hsa-miR-451a	47.669	132.347	9358.36	30.7756	345.02	1132.96	-6.32204	-2.66039	0.0322693	0.158434
hsa-miR-10525-3p	1.87942	1.47052	3.54698	2.89556	8.75829	12.6368	3.52099	1.81598	0.0323073	0.158434
hsa-miR-1843	31.6085	33.2338	21.814	3.86764	12.6006	10.3392	-3.25314	-1.70183	0.0326515	0.159748
hsa-miR-12128	4.95485	8.08787	9.31084	4.15719	1.0736	0.846483	-3.58121	-1.84045	0.0332705	0.162397
hsa-miR-3928-3p	2.73371	1.17642	2.30554	7.36299	5.82003	5.86492	2.99943	1.58469	0.0340559	0.165844
hsa-miR-511-3p	3.11814	8.01434	2.30554	1.26164	1.63865	0.181389	-4.30688	-2.10664	0.0345198	0.167451
hsa-miR-3191-5p	9.39712	11.9112	10.641	58.3661	45.3171	13.6042	3.67431	1.87747	0.0345457	0.167451
hsa-miR-29a-3p	1076.48	1875.58	1745.38	23.2265	340.387	809.721	-4.00364	-2.00131	0.0349535	0.16845
hsa-miR-5190	1.02514	2.86752	0.443373	5.99794	5.70702	3.86963	3.57851	1.83936	0.0349883	0.16845
hsa-miR-219b-3p	1.66585	5.51446	2.74891	19.7105	6.89362	4.59519	3.15916	1.65954	0.0349931	0.16845
hsa-miR-519a-2-5p	0.768855	1.9852	1.95084	0.103413	0.282526	0.362778	-6.83897	-2.77378	0.0352711	0.169398
hsa-miR-4696	8.54284	40.807	47.5296	8.50053	10.3404	13.7251	-2.97376	-1.57229	0.0357855	0.171476
hsa-miR-618	5.59556	1.91168	4.96578	0.0620476	1.63865	0.906946	-4.86552	-2.28259	0.0360761	0.172473
hsa-miR-3617-5p	0.0854284	2.42636	0.798072	2.83351	4.68992	6.59047	4.27499	2.09592	0.0363192	0.173061
hsa-miR-27b-5p	8.11569	21.5431	17.5576	3.80559	3.95536	8.16251	-2.97244	-1.57165	0.0364247	0.173061
hsa-miR-6090	5.55284	3.3822	2.30554	10.5688	8.92781	11.7903	2.7011	1.43355	0.036447	0.173061
hsa-miR-6880-3p	5.21113	18.8227	3.72433	3.49535	0.847577	2.96269	-3.77417	-1.91616	0.0367435	0.174074
hsa-miR-645	0.939712	0.661735	2.74891	9.70011	4.06837	1.93482	3.66138	1.87239	0.0370601	0.175178
hsa-miR-3935	0.854284	2.72047	2.03952	8.50053	3.67283	4.83704	3.09656	1.63066	0.0381039	0.179706
hsa-miR-4749-3p	1.58042	0.220578	2.12819	5.39814	2.76875	5.50214	3.46919	1.7946	0.0383225	0.180331
hsa-miR-1538	10.465	17.9404	12.9465	88.6247	18.5337	29.4455	3.30721	1.72562	0.0385199	0.180853
hsa-miR-4292	177.734	368.072	100.557	30.2586	84.6447	80.5368	-3.30863	-1.72623	0.0389887	0.182237
hsa-miR-4436b-5p	40.2795	5.0733	2.39421	7.44572	2.71225	3.20454	-3.5679	-1.83507	0.0389563	0.182237
hsa-miR-1271-3p	1.23871	3.0881	1.24144	8.43848	2.65574	7.67881	3.38351	1.75852	0.0399913	0.186093
hsa-miR-2116-5p	7.85941	1.32347	0.975421	10.879	8.58878	13.1205	3.16243	1.66103	0.0399032	0.186093
hsa-miR-224-5p	2.81914	6.91145	5.67518	1.48914	26.2184	24.9108	3.412	1.77062	0.0408191	0.189524
hsa-miR-8088	0.128143	0.294104	0.798072	2.2544	1.1301	1.57204	4.55122	2.18625	0.0411474	0.19012
hsa-miR-4715-3p	6.96241	6.69087	3.19229	1.36505	1.18661	2.72084	-3.26683	-1.70789	0.041167	0.19012
hsa-miR-6842-3p	11.2338	32.425	28.2872	7.38367	11.1315	8.10205	-2.70107	-1.43353	0.0412199	0.19012
hsa-miR-1277-3p	3.03271	1.54405	0.886746	5.06722	2.76875	11.7298	3.49886	1.80688	0.0414786	0.190893
hsa-miR-3120-5p	156.975	115.436	156.688	370.9	667.325	302.436	3.12386	1.64333	0.0417024	0.191502
hsa-miR-4327	7.77398	12.2789	18.533	18.0145	45.9952	46.2542	2.86189	1.51697	0.0420119	0.192501
hsa-miR-3614-3p	5.29656	0.220578	0.532048	8.62462	7.23265	6.28816	3.59825	1.84729	0.0422645	0.193017
hsa-miR-6727-5p	0.726141	5.0733	1.50747	4.50879	8.36276	11.8508	3.38555	1.75939	0.0423088	0.193017
hsa-miR-4650-3p	1.32414	9.48487	2.39421	7.52845	14.9739	16.9901	2.99124	1.58074	0.0438125	0.199442
hsa-miR-3127-3p	2.64828	12.2789	5.5865	12.4716	16.8385	29.5664	2.87304	1.52258	0.0446595	0.202857
hsa-miR-767-5p	6.53527	9.92602	13.2125	1.88211	0.904082	6.16723	-3.32611	-1.73383	0.0449415	0.203696
hsa-miR-4693-3p	2.56285	1.6911	1.0641	8.45916	6.04605	3.14408	3.25335	1.70193	0.0452406	0.204608
hsa-miR-646	4.14328	8.30845	6.47325	1.09617	2.2602	2.7813	-3.1446	-1.65288	0.0454942	0.205312
hsa-miR-3944-3p	2.77642	2.20578	0.798072	10.6515	3.50332	4.89751	3.2507	1.70075	0.0457362	0.20596
hsa-miR-604	5.1257	3.30867	3.01494	29.8656	2.09069	9.31131	3.59572	1.84628	0.0458427	0.205997
hsa-miR-296-3p	6.3217	7.72024	8.86746	41.0342	16.217	14.1484	3.13045	1.64637	0.0460174	0.206339
hsa-miR-155-5p	477.117	1060.03	690.864	1343.02	2781.97	3148.07	3.2644	1.70682	0.0464627	0.207891
hsa-miR-6823-5p	5.7237	2.79399	8.69011	28.4385	11.075	13.4228	3.08698	1.6262	0.0466967	0.208492
hsa-miR-542-5p	10.0805	15.8081	9.48818	7.88005	54.0189	55.5655	3.31587	1.72939	0.047201	0.209405
hsa-miR-5087	25.5858	3.30867	4.69975	2.66805	2.99477	4.23241	-3.41052	-1.76999	0.0471143	0.209405
hsa-miR-4798-5p	1.75128	0	0.354698	5.02586	2.48623	1.6325	4.18676	2.06584	0.0471944	0.209405
hsa-miR-548a-3p	0.341713	0.441157	2.83759	1.94416	3.67283	7.79973	3.74459	1.90481	0.0477	0.210803
hsa-miR-6826-3p	7.85941	13.3082	7.89204	4.57084	2.48623	1.69297	-3.24436	-1.69794	0.0477176	0.210803
hsa-miR-5094	0.982426	0.220578	1.15277	2.68873	4.85944	1.26972	3.6944	1.88534	0.0480637	0.21144
hsa-miR-6801-3p	5.21113	6.32324	5.2318	2.75078	1.63865	0.362778	-3.43253	-1.77927	0.0479736	0.21144
hsa-miR-643	11.9173	7.42614	17.5576	5.77043	4.18138	2.35806	-2.9589	-1.56506	0.0484232	0.212575
hsa-miR-1323	2.22114	0.147052	2.74891	4.8604	3.50332	9.91594	3.55053	1.82804	0.0488904	0.213285
hsa-miR-3140-3p	2.86185	0.0735261	2.39421	13.4437	2.37321	2.2976	3.38358	1.75855	0.0488807	0.213285
hsa-miR-432-3p	140.273	6.24972	4.96578	15.4292	14.6913	8.10205	-3.96321	-1.98667	0.0486891	0.213285
hsa-miR-6826-5p	0.726141	0	0.620722	2.62668	0	4.89751	5.4516	2.44668	0.0490852	0.213689
hsa-miR-2276-3p	2.09299	0.220578	0.354698	4.75698	2.09069	3.68825	3.7747	1.91636	0.0495504	0.215267
hsa-miR-6834-3p	2.81914	0.0735261	1.15277	4.94313	3.44681	5.74399	3.41888	1.77353	0.0500461	0.21697
hsa-miR-4740-3p	15.0781	3.89688	6.6506	5.06722	1.1301	2.35806	-2.97214	-1.5715	0.0503329	0.217177
hsa-miR-138-2-3p	5.51013	11.6906	0.177349	1.19959	0.621556	2.47898	-4.04473	-2.01604	0.0503199	0.217177
hsa-miR-19a-3p	24.9878	68.8204	84.5069	4.63289	24.3537	23.9434	-3.37223	-1.7537	0.050405	0.217177
hsa-miR-320a-3p	90.8104	200.653	77.5903	81.2824	685.012	528.326	3.50757	1.81047	0.0511856	0.218295
hsa-miR-501-5p	3.28899	3.30867	1.33012	5.77043	10.6795	7.55788	2.95142	1.56141	0.0511339	0.218295
hsa-miR-4762-5p	27.4225	156.096	178.059	53.4023	26.0489	35.7337	-3.13674	-1.64927	0.0511371	0.218295
hsa-miR-92a-1-5p	4.86942	26.9841	42.0318	14.0021	4.23788	6.22769	-3.0079	-1.58876	0.0509699	0.218295
hsa-miR-297	136.386	11.4701	9.04481	22.0683	5.98954	13.1205	-3.8088	-1.92934	0.0510468	0.218295
hsa-miR-5009-3p	1.23871	0.0735261	0.443373	1.63392	2.76875	3.50686	4.19148	2.06746	0.0515339	0.219333
hsa-miR-1287-5p	1.92214	2.94104	11.9711	7.90073	18.8162	18.9854	2.7244	1.44594	0.0516584	0.219417
hsa-miR-192-5p	108.409	59.3356	88.3199	3.16443	40.6837	32.3477	-3.36364	-1.75002	0.0517712	0.219451
hsa-miR-6719-3p	2.22114	5.58798	7.98072	1.38573	0.621556	2.53945	-3.46025	-1.79087	0.0519521	0.219773
hsa-miR-1244	5.80913	4.26451	6.38457	10.9824	23.2801	10.1578	2.69041	1.42782	0.0522158	0.220443
hsa-miR-6861-5p	2.05028	3.52925	0.354698	7.63186	1.69515	9.43224	3.13722	1.64949	0.0528005	0.222463
hsa-miR-345-3p	25.1159	16.1022	18.8877	10.2172	6.15906	5.86492	-2.67612	-1.42014	0.0533943	0.223659
hsa-miR-146a-3p	4.48499	9.04371	1.33012	34.1262	6.6111	7.61834	3.25119	1.70097	0.0532513	0.223659
hsa-miR-619-5p	2.13571	7.79377	6.20722	0.289556	2.93827	0.846483	-3.99301	-1.99748	0.0534047	0.223659
hsa-miR-5089-3p	4.57042	4.04393	1.95084	1.01344	0.791072	1.20926	-3.57718	-1.83882	0.0543359	0.227105
hsa-miR-3121-5p	2.77642	3.3822	6.11855	8.1696	8.8148	14.9948	2.62816	1.39405	0.0545631	0.2276
hsa-miR-4671-3p	1.92214	3.74983	0.532048	8.37643	10.51	1.93482	3.33664	1.7384	0.0566977	0.236034
hsa-miR-3914	2.69099	0.147052	0.266024	6.76319	1.92117	2.7813	3.59024	1.84408	0.0568668	0.236268
hsa-miR-6828-5p	1.66585	5.29388	1.86217	17.4147	3.50332	4.23241	2.86133	1.51668	0.0589206	0.244316
hsa-miR-92a-2-5p	10.3368	12.7935	3.10361	2.37849	1.24311	4.95797	-3.07202	-1.61919	0.0593848	0.245755
hsa-miR-4318	3.07542	2.20578	2.03952	19.2554	2.65574	1.69297	3.21918	1.6867	0.0602448	0.248822
hsa-miR-3065-3p	2.17842	0.955839	3.01494	3.32989	16.7255	0.78602	3.37612	1.75537	0.0607318	0.250339
hsa-miR-1231	3.03271	0.294104	1.0641	8.06619	4.68992	2.11621	3.3232	1.73257	0.0611594	0.251607
hsa-miR-6772-3p	11.2765	0.36763	1.33012	1.50983	0.734567	1.20926	-3.75391	-1.90839	0.0614863	0.252455
hsa-miR-634	7.17598	13.2347	7.0053	1.67529	5.481	2.66037	-2.81906	-1.49522	0.0619131	0.253221
hsa-miR-5579-3p	161.972	617.84	781.401	22.2131	195.508	234.597	-3.45186	-1.78737	0.0619147	0.253221
hsa-miR-1471	4.18599	6.39677	4.16771	23.4747	8.47577	9.67409	2.83437	1.50303	0.0622934	0.254274
hsa-miR-424-3p	4.8267	10.2201	18.799	8.31438	53.4538	38.7568	2.97216	1.57151	0.0631788	0.256388
hsa-miR-10400-3p	6.53527	0.36763	4.25638	20.5171	6.27207	8.16251	3.11963	1.64137	0.0630356	0.256388
hsa-miR-2110	9.48255	3.89688	8.77879	20.7446	22.4325	20.376	2.85204	1.512	0.0631193	0.256388
hsa-miR-4463	1.28143	10.4407	3.36964	0.124095	0.22602	2.96269	-4.58509	-2.19695	0.0633169	0.256452
hsa-miR-33b-3p	0.555284	0.220578	6.20722	5.43951	12.2616	5.86492	3.3889	1.76082	0.0639928	0.257694
hsa-miR-4693-5p	0.683427	0.36763	0.443373	1.94416	2.71225	1.45111	3.7567	1.90947	0.0638089	0.257694
hsa-miR-7159-5p	3.37442	7.86729	2.92626	10.031	14.1263	9.9764	2.4084	1.26808	0.0638749	0.257694
hsa-miR-5003-5p	0.683427	0.220578	0.0886746	1.22027	2.59924	1.6325	4.66346	2.2214	0.0644613	0.259082
hsa-miR-4746-3p	0.170857	0.0735261	0.443373	0.951397	2.2602	0.362778	5.24245	2.39024	0.0650991	0.260645
hsa-miR-92b-5p	96.0215	14.4111	18.3556	15.1189	10.3969	16.0832	-3.09788	-1.63128	0.0649822	0.260645
hsa-miR-6128	0.982426	2.27931	1.50747	7.63186	1.46913	4.71612	2.92746	1.54965	0.0654144	0.261408
hsa-miR-129-1-3p	9.61069	1.91168	14.3653	48.8935	18.3642	16.5669	3.23987	1.69594	0.0656718	0.261937
hsa-miR-3662	4.31413	16.8375	13.9219	4.42606	2.48623	6.22769	-2.66114	-1.41204	0.0662914	0.26342
hsa-miR-141-3p	6.15084	12.72	21.814	2.66805	1.1301	8.88807	-3.21055	-1.68282	0.0662954	0.26342
hsa-miR-302f	3.11814	3.74983	0.975421	8.87281	4.80293	6.89279	2.59249	1.37434	0.0672865	0.266196
hsa-miR-6768-5p	6.53527	16.5434	5.76385	50.362	25.7663	12.1531	3.06345	1.61516	0.0673752	0.266196
hsa-miR-371b-5p	0.298999	0.294104	0.532048	0.889349	1.24311	2.72084	4.26381	2.09214	0.0673152	0.266196
hsa-let-7a-2-3p	17.2138	5.44093	11.8824	11.0031	36.2198	55.3842	2.96186	1.5665	0.0689415	0.271871
hsa-miR-433-5p	7.94484	4.55862	0.354698	9.14168	14.4088	11.7903	2.72573	1.44664	0.0700501	0.275723
hsa-miR-6771-5p	0.298999	0.441157	2.12819	3.35057	4.29439	1.45111	3.25332	1.70191	0.0703967	0.276568
hsa-miR-664b-5p	0.128143	0.294104	0.709397	1.26164	1.52564	1.57204	4.33851	2.1172	0.070749	0.277431
hsa-miR-7155-5p	1.62314	3.52925	4.43373	13.4023	7.85421	3.32547	2.59417	1.37527	0.0719726	0.281702
hsa-miR-708-3p	0.854284	0.147052	4.34506	9.49329	4.68992	3.32547	3.29884	1.72196	0.0728874	0.283669
hsa-miR-4496	2.22114	0.441157	2.39421	2.66805	5.36799	8.88807	3.30815	1.72602	0.0730169	0.283669
hsa-miR-1295a	2.47742	0.0735261	0.532048	6.18408	1.92117	2.41852	3.3274	1.7344	0.0729352	0.283669
hsa-miR-3064-3p	2.81914	2.64694	11.0843	1.57187	2.09069	1.6325	-3.10618	-1.63514	0.0727479	0.283669
hsa-miR-302a-5p	2.05028	0	2.03952	6.05999	3.61633	4.23241	3.37498	1.75488	0.0732744	0.284142
hsa-miR-363-5p	0.427142	3.01457	2.21687	11.4168	4.80293	1.33019	3.12543	1.64405	0.073531	0.28461
hsa-miR-4443	1.70857	5.73503	2.74891	11.272	6.6676	6.77186	2.44899	1.29219	0.0739055	0.285532
hsa-miR-217-5p	0.0854284	2.57341	1.86217	1.50983	5.42449	9.12992	3.558	1.83107	0.0745051	0.286575
hsa-miR-330-3p	88.5465	35.8072	20.4838	15.3051	19.2682	15.9018	-2.87377	-1.52294	0.0746064	0.286575
hsa-miR-3195	7.85941	13.97	3.19229	21.2617	20.1158	31.078	2.88679	1.52947	0.0744792	0.286575
hsa-miR-1237-5p	0.469856	3.52925	2.66024	8.21097	7.11964	4.23241	2.97244	1.57165	0.074723	0.286575
hsa-miR-520f-3p	0.768855	0.955839	3.01494	3.97105	2.2602	8.16251	3.07451	1.62036	0.0753953	0.287573
hsa-miR-4527	3.45985	1.61757	3.99036	1.32368	0.339031	0.906946	-3.38407	-1.75876	0.0752806	0.287573
hsa-miR-2681-5p	2.30657	2.27931	1.68482	19.0486	0	4.65565	3.76814	1.91385	0.0751787	0.287573
hsa-miR-4687-5p	48.7369	3.3822	7.89204	6.74251	4.74643	8.64622	-2.9842	-1.57734	0.0767508	0.291153
hsa-miR-221-5p	0.939712	4.55862	5.14313	1.05481	15.5389	19.9528	3.43478	1.78022	0.0766576	0.291153
hsa-miR-4437	2.34928	4.55862	4.16771	16.5667	4.4074	7.25557	2.5726	1.36323	0.0765744	0.291153
hsa-miR-5588-3p	2.64828	0	0.177349	3.26784	3.05128	4.65565	3.77001	1.91457	0.0769829	0.291505
hsa-miR-6813-3p	5.4247	7.86729	11.173	45.8118	13.5612	9.73455	2.83456	1.50313	0.0780646	0.295067
hsa-miR-610	2.98999	0.882313	1.15277	4.75698	11.5835	0.423241	3.29434	1.71999	0.0796237	0.300418
hsa-miR-382-3p	4.2287	4.85272	0.532048	3.49535	13.0527	12.3949	2.98255	1.57654	0.0816089	0.307354
hsa-miR-10394-3p	1.11057	3.89688	2.92626	2.97829	8.08023	10.8833	2.77191	1.47088	0.0819152	0.307954
hsa-miR-5591-3p	1.02514	0.735261	1.33012	1.6546	1.41263	7.1951	3.28358	1.71527	0.0821387	0.308241
hsa-miR-885-3p	31.8648	15.0728	22.4347	7.36299	9.60587	12.274	-2.38997	-1.25699	0.0823354	0.308281
hsa-miR-3180	91.4083	2.94104	10.1976	4.32265	19.7203	7.49742	-3.31803	-1.73033	0.0824438	0.308281
hsa-miR-4484	1.66585	1.61757	1.95084	4.17787	3.84235	6.7114	2.79131	1.48094	0.0834052	0.310592
hsa-miR-4714-5p	7.94484	2.79399	8.33541	26.2461	7.28916	20.7388	2.84351	1.50767	0.083768	0.310592
hsa-miR-374c-3p	1.96485	0.147052	0.266024	0.785937	4.06837	4.59519	3.80435	1.92765	0.0837356	0.310592
hsa-miR-4781-5p	18.4952	2.86752	8.15807	1.01344	0.678061	7.49742	-3.22837	-1.69081	0.0833605	0.310592
hsa-miR-22-3p	18580.3	36255.6	40368.6	1230.22	12041.6	19418.8	-2.9123	-1.54216	0.0839171	0.310592
hsa-miR-4779	17.5128	3.3822	3.36964	5.17064	2.31671	0.302315	-3.09907	-1.63183	0.084545	0.310592
hsa-miR-6890-5p	0.683427	0.147052	0.266024	1.96484	0.960587	1.57204	3.6864	1.88221	0.0840133	0.310592
hsa-miR-125a-3p	27.6361	52.7182	35.2925	1.03413	22.037	18.9249	-2.75688	-1.46304	0.0842685	0.310592
hsa-miR-3115	0.384428	1.9852	7.35999	17.6008	8.58878	3.56732	3.07586	1.62099	0.0844919	0.310592
hsa-miR-5089-5p	42.0308	10.2201	3.19229	8.89349	4.57691	6.89279	-2.72404	-1.44575	0.0841834	0.310592
hsa-miR-6814-5p	17.0002	5.14683	3.54698	8.93486	59.7259	7.31603	2.9461	1.55881	0.0848771	0.310722
hsa-miR-659-5p	2.00757	1.32347	0.709397	12.0372	0.791072	0.483704	3.27376	1.71095	0.0847941	0.310722
hsa-miR-936	2.22114	1.76463	2.21687	2.89556	8.41926	6.22769	2.78456	1.47745	0.0851923	0.310789
hsa-miR-766-3p	4.99756	6.83793	15.6067	11.2513	18.5902	43.352	2.67075	1.41725	0.0850661	0.310789
hsa-miR-4695-5p	0.768855	0.220578	0.443373	2.29576	1.35612	1.57204	3.41729	1.77285	0.0860935	0.31353
hsa-miR-10526-3p	0.768855	3.6763	0.266024	6.55637	4.29439	3.44639	3.03153	1.60005	0.0877445	0.318415
hsa-miR-3939	21.4852	2.05873	6.91662	8.00414	1.75166	0.483704	-2.96024	-1.56571	0.0876449	0.318415
hsa-miR-576-3p	2.39199	0.220578	0.886746	4.83972	2.03418	3.80917	2.96602	1.56853	0.0882673	0.318415
hsa-miR-125a-5p	14796.4	29823.1	27502.8	1893.11	6626.81	16409	-2.89312	-1.53263	0.0882184	0.318415
hsa-miR-6830-3p	6.19356	3.0881	8.33541	3.26784	1.58214	1.51158	-2.70255	-1.43432	0.0881608	0.318415
hsa-miR-6726-3p	2.64828	0.735261	3.28096	1.13754	0.22602	0.181389	-4.05341	-2.01913	0.0883472	0.318415
hsa-miR-153-3p	5.29656	5.29388	4.16771	0.558429	2.48623	2.11621	-2.94101	-1.55631	0.0885728	0.31868
hsa-miR-6165	875.598	1101.79	437.521	415.967	228.111	261.079	-2.66762	-1.41555	0.0893294	0.32085
hsa-miR-10397-5p	3.84428	4.33804	4.16771	10.2172	10.1144	6.83232	2.23604	1.16095	0.0898818	0.32166
hsa-miR-2355-5p	4.74127	8.23492	10.8183	4.46743	2.42972	1.33019	-2.82669	-1.49911	0.0900157	0.32166
hsa-miR-6509-5p	13.4123	2.20578	0.798072	28.9142	14.9739	5.19982	2.97475	1.57277	0.0898052	0.32166
hsa-miR-3664-5p	12.8143	20.5873	19.6858	3.30921	11.3575	8.70668	-2.28238	-1.19054	0.0914384	0.323535
hsa-miR-1228-3p	0.298999	0.220578	1.50747	0.0206825	4.23788	5.62306	4.8551	2.2795	0.0909949	0.323535
hsa-miR-194-3p	0.341713	1.24994	5.05445	0.785937	0.11301	0.665094	-4.12348	-2.04386	0.0911894	0.323535
hsa-miR-671-3p	9.05541	17.3522	4.52241	4.13651	4.74643	2.72084	-2.66165	-1.41232	0.0914674	0.323535
hsa-miR-3184-5p	127.331	301.089	245.806	45.0673	74.5302	120.624	-2.80766	-1.48937	0.0910312	0.323535
hsa-miR-4424	0.854284	0	0.266024	2.81283	0.791072	0.906946	3.79273	1.92324	0.0912792	0.323535
hsa-miR-6850-5p	5.51013	2.72047	1.0641	9.86557	5.19847	7.8602	2.42585	1.27849	0.0918352	0.324288
hsa-miR-378a-3p	1170.41	1301.71	970.278	85.8532	606.978	556.441	-2.75573	-1.46244	0.0924652	0.325963
hsa-miR-4649-3p	42.4152	4.99977	3.54698	5.37746	7.34567	6.28816	-2.68638	-1.42566	0.0936384	0.329544
hsa-miR-5091	0.0854284	1.83815	0.354698	2.02689	3.2773	2.47898	3.42683	1.77688	0.0941908	0.330932
hsa-miR-4255	4.95485	0.147052	1.15277	9.55533	3.55982	4.95797	2.85285	1.5124	0.0948582	0.331423
hsa-miR-4257	6.06541	3.74983	3.63566	1.59256	2.2602	1.33019	-2.67012	-1.41691	0.0946136	0.331423
hsa-miR-2276-5p	5.63827	8.38197	9.75421	2.29576	4.18138	2.53945	-2.65037	-1.40619	0.0948551	0.331423
hsa-miR-4433a-5p	5.33927	2.86752	20.8385	0.97208	2.76875	6.10677	-2.95716	-1.56421	0.0949636	0.331423
hsa-miR-3622a-5p	0.683427	0.147052	0.532048	3.01965	1.1301	0.544167	3.38533	1.7593	0.0951772	0.331616
hsa-miR-4274	0.982426	1.61757	0.443373	3.99173	1.0736	3.86963	2.90719	1.53963	0.0964861	0.331805
hsa-miR-6755-5p	2.73371	2.57341	3.90168	8.95554	6.55459	5.5626	2.35702	1.23696	0.0960374	0.331805
hsa-miR-3183	4.44227	8.23492	7.89204	2.06825	3.61633	1.57204	-2.82847	-1.50002	0.096319	0.331805
hsa-miR-4509	8.50012	8.01434	3.19229	36.2979	10.623	5.5626	2.65975	1.41129	0.0955675	0.331805
hsa-miR-7106-3p	3.58799	1.54405	0.620722	5.3361	6.89362	4.35334	2.78992	1.48022	0.095648	0.331805
hsa-miR-3144-5p	2.09299	0.808787	9.04481	1.09617	2.03418	0.120926	-3.64677	-1.86662	0.0964992	0.331805
hsa-miR-3165	160.52	435.422	520.52	27.5285	111.993	240.159	-2.94091	-1.55626	0.0957855	0.331805
hsa-miR-4701-5p	10.3795	3.0881	7.71469	20.8687	16.33	17.5343	2.56928	1.36136	0.0959901	0.331805
hsa-miR-188-5p	4.48499	5.14683	0.443373	6.12203	5.42449	17.2924	2.83932	1.50554	0.0969136	0.332684
hsa-miR-450a-1-3p	44.8499	41.8363	32.7209	25.3361	12.0356	7.79973	-2.63208	-1.39621	0.0970946	0.332759
hsa-miR-3609	3.88699	2.49989	2.48289	9.78284	8.8713	3.14408	2.44127	1.28763	0.0978323	0.334194
hsa-miR-367-5p	1.196	2.20578	6.11855	0.144778	1.52564	0.78602	-3.92017	-1.97092	0.0976758	0.334194
hsa-miR-3620-3p	24.8597	1.6911	6.11855	5.52224	2.54273	4.29288	-2.64457	-1.40303	0.0989192	0.336962
hsa-miR-6867-3p	7.90212	9.63192	24.6515	4.34333	6.78061	6.65094	-2.3723	-1.24629	0.0989644	0.336962
hsa-miR-4685-5p	4.27142	3.01457	7.80337	2.56464	1.58214	1.02787	-2.82443	-1.49796	0.099704	0.338929
hsa-miR-1245b-5p	8.28655	15.5875	7.98072	6.6391	2.76875	3.86963	-2.36775	-1.24352	0.100104	0.339736
hsa-miR-4803	0.341713	0.147052	0.354698	1.03413	1.63865	1.08833	3.98424	1.9943	0.100337	0.339976
hsa-miR-3672	9.35441	6.98498	12.2371	6.55637	1.92117	2.53945	-2.54935	-1.35013	0.100999	0.341666
hsa-miR-1973	1.11057	0.0735261	2.12819	0.186143	0.282526	0.241852	-4.6501	-2.21726	0.101312	0.342174
hsa-miR-4655-3p	5.80913	3.82336	8.06939	17.9731	11.2445	13.1205	2.41156	1.26996	0.101708	0.342261
hsa-miR-6790-3p	4.39956	8.08787	4.34506	13.2989	9.60587	13.2414	2.15844	1.10999	0.101503	0.342261
hsa-miR-505-5p	7.38955	0.294104	8.60144	11.2513	17.8556	14.5111	2.67311	1.41852	0.101828	0.342261
hsa-miR-1295b-5p	2.05028	1.17642	0.620722	5.02586	2.71225	2.72084	2.62753	1.39371	0.103256	0.344846
hsa-miR-7162-3p	4.05785	0.147052	0.709397	7.67322	1.86467	5.5626	3.02108	1.59506	0.103252	0.344846
hsa-miR-3202	376.995	227.784	39.6376	93.9815	47.8598	86.1598	-2.82645	-1.49899	0.102868	0.344846
hsa-miR-10395-3p	14.1384	2.20578	5.85252	4.69494	2.03418	0.967409	-2.86378	-1.51792	0.103248	0.344846
hsa-miR-5011-3p	49.7193	13.3082	45.5788	158.221	62.0426	75.2765	2.72071	1.44398	0.103568	0.345336
hsa-miR-4735-5p	0.939712	0.0735261	3.63566	0.0413651	0.791072	0.060463	-5.23053	-2.38696	0.103804	0.345573
hsa-miR-5092	0.170857	0.0735261	0.443373	0.413651	2.09069	0.78602	4.75687	2.25001	0.104012	0.345715
hsa-miR-6843-3p	17.043	7.35261	9.22216	7.63186	2.76875	4.4138	-2.2569	-1.17434	0.104415	0.346506
hsa-miR-629-3p	2.00757	1.397	5.67518	2.50259	12.4876	8.64622	2.60711	1.38245	0.105958	0.35107
hsa-miR-124-5p	6.15084	2.05873	0.886746	20.7032	2.59924	1.57204	2.72019	1.44371	0.106948	0.353791
hsa-miR-4440	4.2287	4.99977	4.25638	19.4209	6.38508	4.77658	2.27818	1.18788	0.108106	0.357056
hsa-miR-6816-3p	0.768855	4.70567	3.19229	3.92968	19.4378	1.57204	2.87859	1.52536	0.109264	0.358094
hsa-miR-4475	22.4677	4.19099	24.6515	7.85937	3.55982	9.19038	-2.48802	-1.315	0.109837	0.358094
hsa-miR-4323	8.71369	4.70567	3.81301	2.75078	0	2.72084	-3.13949	-1.65053	0.109425	0.358094
hsa-miR-342-3p	300.024	663.573	926.561	64.6743	314.62	307.878	-2.75085	-1.45988	0.10868	0.358094
hsa-miR-219a-5p	3.24628	5.22035	12.3258	14.4364	10.962	22.5527	2.31866	1.21329	0.109428	0.358094
hsa-miR-1343-5p	0.170857	4.99977	0.709397	5.06722	4.74643	6.83232	2.83109	1.50136	0.109959	0.358094
hsa-miR-203a-5p	4.91213	3.74983	5.49783	10.6308	8.8148	9.85548	2.1078	1.07574	0.109301	0.358094
hsa-miR-378a-5p	14.651	28.8222	14.0993	4.90176	3.95536	16.325	-2.29207	-1.19665	0.109483	0.358094
hsa-miR-7702	0.0854284	0.147052	0.354698	1.88211	0.11301	0.362778	4.18133	2.06396	0.10992	0.358094
hsa-miR-4783-3p	4.74127	0.36763	1.77349	10.2172	3.72934	4.59519	2.66398	1.41358	0.111444	0.362367
hsa-miR-34a-3p	1.32414	4.33804	2.03952	6.57705	5.36799	7.67881	2.57361	1.3638	0.111978	0.362413
hsa-miR-6877-5p	2.43471	0.661735	3.81301	4.94313	6.27207	6.59047	2.57775	1.36611	0.111665	0.362413
hsa-miR-629-5p	2.64828	0.36763	7.80337	10.1758	9.66237	7.01371	2.48894	1.31553	0.111895	0.362413
hsa-miR-545-3p	0.683427	2.57341	0.620722	0.0827302	0.565051	0.302315	-4.26967	-2.09412	0.112311	0.362433
hsa-miR-1301-3p	7.90212	7.0585	7.35999	18.5729	10.9055	22.7341	2.33389	1.22274	0.11233	0.362433
hsa-miR-605-5p	1.495	1.17642	6.2959	9.5967	3.55982	9.55316	2.554	1.35276	0.112568	0.362644
hsa-miR-6753-5p	21.1862	3.6763	0.798072	5.3361	2.42972	1.20926	-2.85342	-1.51269	0.113336	0.364555
hsa-miR-630	2.52014	0	3.36964	3.39194	6.04605	8.58575	3.0455	1.60668	0.114389	0.367378
hsa-miR-4766-3p	2.34928	1.54405	0.0886746	0.0413651	0.734567	0.060463	-4.87493	-2.28538	0.114739	0.367939
hsa-miR-6750-3p	12.5153	4.48509	9.93156	3.80559	2.59924	4.11149	-2.56403	-1.35841	0.116304	0.368541
hsa-miR-12120	3.67342	19.3374	4.61108	3.53671	5.25498	1.33019	-2.72194	-1.44464	0.116235	0.368541
hsa-miR-4269	0.384428	0.735261	0.354698	2.41986	2.42972	0.120926	3.35268	1.74532	0.11556	0.368541
hsa-miR-6872-3p	2.39199	2.35283	6.02987	1.05481	1.69515	0.906946	-2.9223	-1.5471	0.115474	0.368541
hsa-miR-4529-5p	5.46742	3.23515	3.28096	19.8759	3.55982	4.53473	2.33251	1.22188	0.116299	0.368541
hsa-miR-4489	1.58042	5.0733	2.03952	9.30714	1.97768	10.4601	2.50588	1.32532	0.116335	0.368541
hsa-miR-3190-3p	8.32927	8.7496	2.57156	16.5047	24.6927	6.34862	2.40952	1.26875	0.115145	0.368541
hsa-miR-2117	3.58799	2.05873	2.39421	0.496381	1.63865	0	-3.77783	-1.91756	0.116069	0.368541
hsa-miR-4785	1.794	0.294104	0.532048	1.6546	0.565051	6.53001	3.23309	1.69291	0.117382	0.371138
hsa-miR-2861	0.939712	3.60278	2.12819	3.41262	9.77539	4.4138	2.64851	1.40518	0.117509	0.371138
hsa-miR-99a-3p	350.128	484.316	588.445	162.317	250.6	147.228	-2.54013	-1.3449	0.118687	0.37353
hsa-miR-4289	6.44984	7.35261	1.59614	19.2348	6.49809	11.7298	2.42357	1.27713	0.118537	0.37353
hsa-miR-3913-3p	0.683427	0.220578	0.266024	1.92348	2.2037	0.181389	3.50349	1.80879	0.118802	0.37353
hsa-miR-1197	1.66585	16.2493	12.4144	6.28749	0.11301	4.11149	-2.87347	-1.52279	0.119497	0.375151
hsa-miR-193a-3p	60.4406	89.7018	87.1672	48.149	239.525	343.914	2.66109	1.41202	0.120507	0.377191
hsa-miR-4723-5p	4.86942	11.6171	5.76385	2.19235	4.68992	2.11621	-2.48217	-1.3116	0.120329	0.377191
hsa-miR-585-5p	1.32414	0.36763	0.532048	3.68149	0.791072	1.75343	2.71968	1.44344	0.121266	0.379
hsa-miR-4422	119.343	9.77897	11.7937	14.1055	12.9397	24.7294	-2.72383	-1.44563	0.121789	0.380068
hsa-miR-3130-5p	36.7769	25.5871	17.8236	65.7498	35.4287	103.452	2.5469	1.34874	0.122969	0.38261
hsa-miR-4670-5p	0.256285	0.0735261	0.0886746	0.103413	0.847577	1.26972	4.54738	2.18504	0.122967	0.38261
hsa-miR-548ao-5p	8.37198	1.02937	0.620722	8.99691	8.36276	7.67881	2.46824	1.30348	0.123727	0.384397
hsa-miR-526b-5p	2.22114	1.6911	3.54698	8.6453	4.35089	4.53473	2.3977	1.26165	0.124301	0.385609
hsa-miR-204-3p	55.144	234.181	18.4443	51.3341	47.3513	10.8229	-2.80958	-1.49035	0.124586	0.385921
hsa-miR-3148	1.66585	13.5288	9.31084	5.79111	2.65574	0.120926	-2.8407	-1.50625	0.125526	0.387686
hsa-miR-1287-3p	5.97999	6.17619	4.96578	1.55119	0.169515	4.23241	-2.88542	-1.52878	0.125454	0.387686
hsa-miR-6069	11.0203	3.74983	4.61108	21.5719	11.301	13.6646	2.38249	1.25247	0.12585	0.388116
hsa-miR-6785-3p	0.939712	1.397	2.12819	3.14375	4.06837	3.14408	2.46034	1.29886	0.126415	0.388142
hsa-miR-3928-5p	0.256285	3.30867	1.59614	4.69494	4.97245	4.11149	2.69309	1.42926	0.126211	0.388142
hsa-miR-711	1.196	0.514683	6.56192	0.103413	0.282526	1.81389	-3.78807	-1.92146	0.126339	0.388142
hsa-miR-1914-5p	1.196	4.33804	8.60144	0.806619	3.05128	0.906946	-2.96783	-1.56941	0.126947	0.389206
hsa-miR-1303	1.36685	0	0.266024	0.0413651	2.09069	5.0789	4.26212	2.09157	0.127761	0.391128
hsa-miR-1199-3p	7.43227	6.32324	6.02987	4.67425	1.35612	1.51158	-2.56041	-1.35637	0.128103	0.391603
hsa-miR-5693	11.362	6.83793	6.56192	6.65978	49.894	4.23241	2.44861	1.29196	0.12929	0.394654
hsa-miR-148b-5p	2.60557	4.85272	2.57156	19.3589	0.621556	5.86492	2.57876	1.36668	0.129508	0.394744
hsa-miR-4431	441.28	44.9244	81.1373	31.6443	125.215	52.6633	-2.70852	-1.4375	0.13138	0.398131
hsa-miR-219a-2-3p	5.46742	5.14683	2.57156	17.6008	8.64528	3.80917	2.27551	1.18619	0.13128	0.398131
hsa-miR-6752-5p	6.23627	4.26451	3.45831	1.48914	2.82526	1.75343	-2.38846	-1.25608	0.131107	0.398131
hsa-miR-4713-5p	2.26385	4.11746	5.49783	10.4447	8.13674	5.86492	2.10267	1.07222	0.131202	0.398131
hsa-miR-10527-5p	3.67342	0.0735261	1.68482	2.7301	9.83189	3.62778	2.94067	1.55615	0.13345	0.403821
hsa-miR-6731-5p	7.98755	9.11724	8.95614	20	17.7426	20.376	2.27875	1.18824	0.13376	0.404176
hsa-miR-3116	21.3571	30.881	39.4602	60.3723	80.6328	82.7134	2.44609	1.29048	0.134463	0.405169
hsa-miR-4649-5p	21.3998	2.27931	2.66024	4.30197	4.18138	1.57204	-2.62184	-1.39058	0.134476	0.405169
hsa-miR-558	0.854284	1.6911	0.443373	3.41262	2.82526	1.45111	2.57564	1.36493	0.135803	0.407994
hsa-miR-6844	3.41713	1.61757	5.40915	11.5202	3.16429	7.79973	2.16408	1.11376	0.135783	0.407994
hsa-miR-12126	4.10056	4.7792	9.39951	3.5574	1.69515	2.17667	-2.39409	-1.25948	0.136814	0.408104
hsa-miR-6074	4.61313	1.397	8.24674	1.55119	2.2602	1.75343	-2.56164	-1.35707	0.136202	0.408104
hsa-miR-1258	7.68855	1.17642	4.96578	23.9504	7.91072	2.96269	2.51278	1.32928	0.136653	0.408104
hsa-miR-6821-5p	14.4801	5.73503	4.61108	6.80456	2.14719	1.69297	-2.3163	-1.21182	0.13673	0.408104
hsa-miR-4288	12.0881	8.97018	6.47325	37.0631	17.2906	11.4275	2.38587	1.25452	0.136682	0.408104
hsa-miR-5707	1.23871	0	0.266024	0.889349	2.03418	2.96269	3.6698	1.8757	0.137402	0.408694
hsa-miR-1207-5p	21.1862	5.88209	13.1238	3.12306	5.82003	8.40436	-2.33384	-1.22271	0.137242	0.408694
hsa-miR-6868-3p	19.3495	12.72	4.8771	4.71562	2.31671	8.70668	-2.35657	-1.23669	0.138071	0.410102
hsa-miR-10398-3p	130.406	8.23492	18.533	20.5998	19.2117	19.59	-2.64715	-1.40444	0.138333	0.410295
hsa-miR-6776-3p	8.84184	3.82336	3.81301	3.49535	1.0736	2.2976	-2.38204	-1.2522	0.139093	0.411367
hsa-miR-4700-3p	3.24628	2.49989	0.709397	7.42503	4.57691	3.80917	2.40575	1.26649	0.139027	0.411367
hsa-miR-888-5p	4.05785	0.0735261	6.82795	1.98552	0.0565051	1.33019	-3.22218	-1.68804	0.139283	0.411367
hsa-miR-191-5p	2576.78	2831.2	3745.88	218.821	1641.64	1783.96	-2.51179	-1.32872	0.13972	0.412075
hsa-miR-6841-5p	0.469856	2.64694	2.66024	0.206825	0	1.20926	-4.10547	-2.03755	0.140232	0.413003
hsa-miR-6744-5p	9.26898	22.5725	12.8578	10.5481	4.29439	5.19982	-2.21024	-1.1442	0.141092	0.414954
hsa-miR-6761-3p	1.45228	0	1.33012	0.599794	2.76875	5.86492	3.26525	1.7072	0.141341	0.415103
hsa-miR-6866-5p	1.15328	0.588209	0.886746	0.992762	1.86467	5.01843	2.89901	1.53556	0.14155	0.415134
hsa-miR-4760-3p	3.24628	2.35283	0.709397	5.79111	6.21556	3.62778	2.41521	1.27215	0.141912	0.415612
hsa-miR-1204	19.136	32.8662	32.1889	90.6309	53.5668	41.1753	2.20754	1.14244	0.142249	0.416018
hsa-miR-4727-5p	34.4703	24.9253	27.4891	14.1055	16.7255	7.67881	-2.25383	-1.17238	0.144054	0.42071
hsa-miR-4523	1.15328	0.0735261	3.19229	6.28749	2.14719	2.7813	2.55375	1.35262	0.145451	0.424199
hsa-miR-449b-3p	4.01513	1.91168	7.80337	1.05481	0.847577	3.44639	-2.58276	-1.36891	0.146352	0.42446
hsa-miR-4258	1.02514	3.60278	3.10361	5.02586	2.59924	11.0043	2.42093	1.27556	0.14579	0.42446
hsa-miR-7152-3p	11.7037	21.102	24.7402	7.818	5.98954	12.9391	-2.14999	-1.10433	0.146319	0.42446
hsa-miR-4635	34.6839	2.20578	1.68482	7.17684	5.08546	2.41852	-2.62778	-1.39384	0.14616	0.42446
hsa-miR-499a-3p	2.00757	1.76463	0.443373	6.92865	1.80816	1.87435	2.49277	1.31775	0.146938	0.424984
hsa-miR-6836-3p	16.4877	10.2937	12.1484	6.94933	6.6676	6.65094	-1.93804	-0.954595	0.146835	0.424984
hsa-miR-296-5p	8.20112	5.0733	2.03952	36.939	2.03418	2.11621	2.67842	1.42138	0.147162	0.425046
hsa-miR-5680	3.33171	4.70567	2.83759	2.41986	0.734567	1.1488	-2.4231	-1.27685	0.149115	0.426404
hsa-miR-6767-3p	0.213571	0.0735261	1.77349	2.48191	1.24311	2.2976	2.99594	1.58301	0.150082	0.426404
hsa-miR-3691-3p	16.1887	14.9258	22.7007	8.43848	10.962	7.67881	-1.98266	-0.987436	0.15028	0.426404
hsa-miR-6774-3p	5.29656	20.2932	30.4154	8.45916	6.44158	9.73455	-2.26741	-1.18104	0.14882	0.426404
hsa-miR-6868-5p	12.1308	3.01457	1.24144	1.03413	2.31671	2.84176	-2.6782	-1.42126	0.150186	0.426404
hsa-miR-4774-5p	1.11057	1.47052	0.709397	1.1789	4.52041	3.56732	2.7413	1.45486	0.14939	0.426404
hsa-miR-4299	3.84428	1.24994	8.15807	10.6515	7.45868	9.31131	2.07839	1.05547	0.149719	0.426404
hsa-miR-6859-3p	5.16842	1.54405	10.0202	4.46743	1.63865	0.120926	-2.65937	-1.41108	0.149162	0.426404
hsa-miR-597-3p	3.20356	0.220578	1.0641	3.72286	5.82003	2.41852	2.60281	1.38007	0.149303	0.426404
hsa-miR-6763-3p	15.7615	22.5725	101.621	26.6391	16.217	13.967	-2.45907	-1.29812	0.150271	0.426404
hsa-miR-4777-5p	7.77398	4.85272	3.72433	2.83351	2.09069	2.47898	-2.22331	-1.15271	0.150193	0.426404
hsa-miR-7158-3p	27.2944	23.7489	20.7499	7.65254	12.6006	15.9622	-2.00149	-1.00108	0.148744	0.426404
hsa-miR-6724-5p	2.69099	5.51446	3.19229	17.4561	4.01186	4.65565	2.30437	1.20437	0.147991	0.426404
hsa-miR-372-5p	0.768855	0.0735261	3.54698	0.248191	0.734567	0.060463	-4.16335	-2.05775	0.151761	0.430024
hsa-miR-4311	1.87942	6.83793	2.30554	10.4447	7.40217	5.01843	2.08603	1.06076	0.152942	0.430374
hsa-miR-4315	1.495	4.99977	2.48289	15.181	1.1301	5.50214	2.43821	1.28582	0.152899	0.430374
hsa-miR-145-3p	4.2287	6.54382	5.05445	17.7043	7.57169	7.43695	2.08493	1.06	0.153529	0.430374
hsa-miR-520e-5p	4.14328	0	0.443373	7.9421	1.18661	4.35334	2.90058	1.53634	0.153092	0.430374
hsa-miR-3978	9.18355	9.77897	19.065	12.575	30.8518	41.9009	2.24464	1.16649	0.152619	0.430374
hsa-miR-3611	7.09055	0.36763	3.99036	17.787	5.5375	4.89751	2.45633	1.29651	0.153246	0.430374
hsa-miR-3658	1.96485	3.52925	0.975421	1.59256	0.395536	0.060463	-3.03655	-1.60243	0.153155	0.430374
hsa-miR-30a-3p	755.742	1075.32	1805.42	82.3372	660.149	764.797	-2.41269	-1.27064	0.153383	0.430374
hsa-miR-185-3p	5.76641	0.294104	0.443373	6.01862	4.74643	5.74399	2.49793	1.32073	0.154591	0.432771
hsa-miR-5580-3p	12.5153	13.4553	10.7296	8.6453	7.17615	0.181389	-2.2878	-1.19396	0.155015	0.433378
hsa-miR-339-3p	48.6942	50.0713	53.1161	5.5636	23.5061	41.2963	-2.16161	-1.1121	0.155263	0.433495
hsa-miR-616-3p	13.455	0	2.03952	2.29576	1.92117	1.1488	-2.88734	-1.52974	0.155688	0.434103
hsa-miR-6793-3p	0.384428	0.0735261	0.443373	1.48914	0.395536	0.967409	3.15372	1.65705	0.157789	0.43932
hsa-miR-7112-5p	2.30657	1.10289	8.77879	1.53051	0.508546	2.59991	-2.61442	-1.38649	0.158376	0.43932
hsa-miR-6815-3p	2.43471	7.86729	11.173	3.22648	4.4074	1.45111	-2.34634	-1.23041	0.158248	0.43932
hsa-miR-2053	5.4247	0.147052	0.443373	7.11479	2.2037	7.1951	2.70695	1.43667	0.158398	0.43932
hsa-miR-483-3p	29.8145	27.0576	26.5137	4.8604	29.3262	2.53945	-2.27271	-1.18441	0.15867	0.439491
hsa-miR-4254	3.84428	4.26451	4.52241	17.5181	8.64528	2.17667	2.25083	1.17046	0.158902	0.439553
hsa-miR-4510	70.4784	133.965	67.8361	19.8552	64.9244	32.4687	-2.32404	-1.21663	0.159748	0.441309
hsa-miR-6757-3p	5.25384	3.45573	2.74891	11.7684	1.80816	10.5206	2.09429	1.06646	0.161927	0.444489
hsa-miR-503-5p	23.6637	49.336	38.7508	1.73733	23.7321	23.762	-2.27234	-1.18418	0.161836	0.444489
hsa-miR-3141	6.87698	16.6169	10.2863	2.77146	5.98954	5.98584	-2.30493	-1.20473	0.16196	0.444489
hsa-miR-500b-3p	3.54528	7.72024	3.54698	0.186143	2.03418	3.20454	-2.75913	-1.46421	0.161547	0.444489
hsa-miR-3167	7.17598	2.49989	0.620722	1.05481	2.14719	0.725557	-2.64981	-1.40589	0.161263	0.444489
hsa-miR-6825-5p	5.97999	4.04393	2.12819	2.85419	0.169515	1.57204	-2.61546	-1.38707	0.162693	0.445915
hsa-miR-4453	7.13327	18.3815	11.173	5.5636	6.44158	5.0789	-2.13913	-1.09702	0.162918	0.445949
hsa-miR-6870-3p	3.20356	1.6911	5.2318	0.144778	2.93827	0.302315	-3.01363	-1.5915	0.163622	0.447289
hsa-miR-8080	3.88699	1.47052	2.57156	1.98552	0.791072	0.060463	-2.72798	-1.44783	0.165149	0.448295
hsa-miR-3910	1.87942	3.0881	0.266024	9.2451	0.904082	2.66037	2.43936	1.2865	0.165326	0.448295
hsa-miR-4753-5p	3.11814	6.39677	8.95614	20.7032	16.4995	3.86963	2.23381	1.15951	0.16613	0.448295
hsa-miR-4798-3p	0.683427	0	0.0886746	0.0620476	0.0565051	0.060463	-4.47398	-2.16156	0.16572	0.448295
hsa-miR-6815-5p	3.9297	3.97041	10.3749	18.2627	12.3181	6.59047	2.04995	1.03559	0.166013	0.448295
hsa-miR-6501-3p	0.213571	0.588209	0.532048	0.144778	1.18661	3.56732	3.63017	1.86004	0.165214	0.448295
hsa-miR-378j	2.69099	0.36763	3.90168	9.18305	2.2602	5.26029	2.40323	1.26497	0.164745	0.448295
hsa-miR-605-3p	8.71369	0.0735261	0.266024	1.05481	0.169515	1.6325	-3.17537	-1.66692	0.164826	0.448295
hsa-miR-516a-3p	7.85941	11.5436	10.9957	13.1127	34.3551	16.2646	2.09628	1.06783	0.164505	0.448295
hsa-miR-450b-5p	0.555284	3.30867	0.798072	2.79214	1.46913	7.13464	2.44053	1.28719	0.165743	0.448295
hsa-miR-32-3p	4.05785	6.61735	12.6805	1.34437	4.06837	4.47427	-2.37424	-1.24747	0.166434	0.448312
hsa-miR-2114-3p	11.4474	16.911	16.9369	12.8645	2.54273	5.38121	-2.16142	-1.11198	0.166565	0.448312
hsa-miR-541-5p	32.6763	18.455	25.0949	35.8015	126.628	18.5017	2.37159	1.24585	0.167374	0.449912
hsa-miR-3130-3p	0.597999	1.10289	0.709397	2.7301	1.75166	1.26972	2.51049	1.32797	0.167834	0.45057
hsa-miR-4427	1.495	0.0735261	2.39421	1.1789	4.80293	5.01843	2.75747	1.46334	0.168533	0.45129
hsa-miR-4713-3p	143.178	8.52903	13.3012	13.1955	26.9529	26.0596	-2.4941	-1.31852	0.16848	0.45129
hsa-miR-6500-3p	4.14328	6.39677	13.2125	4.19856	2.03418	4.05102	-2.28376	-1.19141	0.169702	0.451928
hsa-miR-532-3p	18.6234	29.1899	12.8578	60.7446	25.9924	50.1843	2.25667	1.1742	0.169851	0.451928
hsa-miR-152-5p	7.64584	0.294104	6.2959	13.2575	7.17615	11.6694	2.24884	1.16918	0.169385	0.451928
hsa-miR-3162-5p	1.32414	0.220578	0.532048	2.75078	2.14719	0.78602	2.62822	1.39408	0.169612	0.451928
hsa-miR-6509-3p	9.05541	7.27908	5.67518	0.930714	5.25498	3.32547	-2.34509	-1.22964	0.169433	0.451928
hsa-miR-4732-3p	6.0227	13.2347	17.5576	1.71665	4.06837	10.3996	-2.28194	-1.19026	0.170571	0.453013
hsa-miR-6834-5p	3.50256	0.0735261	0.443373	6.9907	1.46913	2.47898	2.6751	1.41959	0.170691	0.453013
hsa-miR-11181-5p	4.27142	35.6602	2.92626	5.41883	1.41263	10.3392	-2.49548	-1.31932	0.171904	0.455654
hsa-miR-486-5p	10.8921	15.8081	42.1204	6.30818	12.9397	15.5995	-1.97558	-0.982277	0.172484	0.456615
hsa-miR-335-3p	314.462	1010.4	705.673	335.305	227.264	366.225	-2.186	-1.1283	0.172976	0.457338
hsa-miR-10522-5p	2.22114	1.76463	2.12819	8.66599	1.52564	2.66037	2.11519	1.08079	0.173223	0.457412
hsa-miR-4534	1.36685	3.82336	1.15277	1.79938	0.169515	0.181389	-2.83108	-1.50135	0.17387	0.458544
hsa-miR-4694-5p	0.0854284	1.32347	0.0886746	2.606	0.452041	1.39065	2.97891	1.57478	0.174562	0.45979
hsa-miR-374a-5p	17.7264	41.3217	31.6568	7.01138	100.184	106.415	2.35436	1.23534	0.17498	0.460312
hsa-miR-134-3p	18.7942	1.76463	1.33012	0.992762	3.61633	4.23241	-2.49193	-1.31726	0.17664	0.463004
hsa-miR-3117-3p	1.58042	0	1.15277	2.27508	2.99477	2.17667	2.66569	1.41451	0.1765	0.463004
hsa-miR-3122	4.01513	0.220578	3.63566	4.44675	5.19847	9.61362	2.42983	1.28086	0.176667	0.463004
hsa-miR-1324	3.63071	7.49966	6.2959	1.15822	1.86467	4.71612	-2.27487	-1.18579	0.178348	0.466464
hsa-miR-3619-3p	5.04027	4.41157	3.99036	2.04757	3.10778	1.1488	-2.1449	-1.10091	0.178432	0.466464
hsa-miR-421	6.83427	6.10267	4.43373	1.94416	17.1776	20.8598	2.2911	1.19604	0.179294	0.467659
hsa-miR-670-5p	16.8721	22.646	26.2477	5.87384	7.40217	20.8598	-1.93157	-0.949774	0.179336	0.467659
hsa-miR-6772-5p	4.74127	0.661735	5.49783	19.5657	3.61633	1.81389	2.29423	1.19801	0.179873	0.468475
hsa-miR-126-3p	337021	744672	814270	43113.6	361663	429848	-2.27164	-1.18373	0.181377	0.470652
hsa-miR-95-3p	1.58042	2.79399	0.620722	3.68149	4.68992	3.08362	2.26041	1.17658	0.181092	0.470652
hsa-miR-4782-5p	7.77398	4.99977	12.1484	3.53671	3.61633	4.89751	-2.06976	-1.04946	0.181383	0.470652
hsa-miR-4638-3p	3.11814	4.33804	4.34506	1.7787	2.03418	1.1488	-2.25663	-1.17417	0.183101	0.474522
hsa-miR-6832-3p	1.15328	2.64694	5.32048	2.39918	0.847577	0	-2.75531	-1.46222	0.183654	0.475366
hsa-miR-548m	0.896998	4.26451	0.354698	3.49535	3.78584	5.98584	2.3957	1.26045	0.184025	0.475548
hsa-miR-4802-3p	0.427142	1.91168	2.21687	0.930714	5.25498	5.50214	2.57345	1.3637	0.184195	0.475548
hsa-miR-5705	5.55284	0.588209	1.95084	9.22441	4.12487	4.29288	2.15718	1.10914	0.184405	0.475548
hsa-miR-4755-5p	2.98999	0.0735261	2.12819	1.94416	3.67283	7.1951	2.43785	1.28561	0.185262	0.47717
hsa-miR-1285-3p	9.35441	1.397	0.798072	2.41986	1.0736	1.1488	-2.48672	-1.31425	0.185539	0.477296
hsa-miR-3136-3p	3.50256	0.0735261	2.21687	7.17684	2.88176	3.86963	2.38633	1.25479	0.186137	0.478247
hsa-miR-8074	0.384428	2.57341	0.443373	9.34851	0.169515	0.241852	2.86907	1.52058	0.18841	0.483492
hsa-miR-5681b	1.36685	5.66151	5.05445	17.3527	2.09069	6.95325	2.19637	1.13512	0.188986	0.484378
hsa-miR-8062	5.68099	6.39677	1.95084	14.2916	10.3969	4.05102	2.04243	1.03029	0.189935	0.484772
hsa-miR-1206	4.74127	5.22035	0.620722	16.877	3.44681	2.90223	2.18959	1.13066	0.190054	0.484772
hsa-miR-623	5.89456	3.60278	8.86746	13.2161	17.9686	4.95797	1.97183	0.979533	0.189542	0.484772
hsa-miR-516b-5p	0.213571	1.47052	2.48289	2.66805	1.01709	6.16723	2.38384	1.25329	0.190066	0.484772
hsa-miR-7161-3p	39.895	2.79399	4.78843	9.65875	5.02896	6.7114	-2.2204	-1.15082	0.191347	0.485831
hsa-miR-31-5p	1725.52	5536.59	5452.34	431.748	2239.52	2888.2	-2.28701	-1.19346	0.191182	0.485831
hsa-miR-12116	0.811569	0	0.266024	1.1789	2.37321	0.120926	3.22844	1.69084	0.191409	0.485831
hsa-miR-5581-3p	3.58799	5.3674	7.62602	7.28026	14.8043	9.9764	1.94425	0.959211	0.191026	0.485831
hsa-miR-12127	1.45228	1.83815	0.709397	3.18511	2.99477	2.7813	2.19388	1.13348	0.191933	0.4863
hsa-miR-11399	46.5585	31.9838	99.4929	32.968	31.0778	16.9297	-2.1955	-1.13455	0.192058	0.4863
hsa-miR-130a-3p	218.44	433.436	279.325	21.5098	199.463	185.077	-2.2937	-1.19768	0.194094	0.490359
hsa-miR-4314	2.47742	3.30867	1.41879	1.40641	0.339031	1.02787	-2.51486	-1.33048	0.19413	0.490359
hsa-miR-4668-5p	6.36441	19.4844	6.82795	8.68667	6.04605	1.45111	-2.00892	-1.00642	0.195646	0.493594
hsa-miR-3975	0.854284	0.147052	0.354698	0.16546	4.29439	0.302315	3.36755	1.7517	0.196038	0.493684
hsa-miR-4447	3.80156	0.147052	1.77349	4.09514	3.50332	6.10677	2.35908	1.23822	0.196153	0.493684
hsa-miR-1281	8.50012	14.7787	12.3258	5.97725	2.93827	8.64622	-2.02331	-1.01672	0.196571	0.493978
hsa-miR-4503	53.5209	0.808787	2.92626	10.6515	5.5375	6.89279	-2.48127	-1.31108	0.196742	0.493978
hsa-miR-374c-5p	0.768855	8.7496	0.443373	2.56464	6.27207	15.1158	2.39875	1.26228	0.198026	0.496012
hsa-miR-23a-3p	7939.75	10333.1	16267.6	906.743	8553.86	6099.45	-2.21982	-1.15044	0.197974	0.496012
hsa-miR-7-1-3p	12.3871	31.1751	45.4901	1.67529	20.1158	19.9528	-2.13511	-1.09431	0.199098	0.497198
hsa-miR-512-3p	1.06785	2.42636	0.532048	6.10135	0.11301	3.56732	2.42303	1.27681	0.199306	0.497198
hsa-miR-519d-5p	4.2287	2.57341	0.709397	9.34851	4.52041	2.17667	2.11709	1.08209	0.199555	0.497198
hsa-miR-1225-3p	6.19356	4.33804	6.02987	9.78284	12.3181	8.10205	1.80964	0.855704	0.200061	0.497198
hsa-miR-3944-5p	4.61313	6.69087	1.95084	10.6929	4.74643	9.79501	1.89711	0.923807	0.200161	0.497198
hsa-miR-2052	1.83671	0	0.443373	0.16546	4.01186	3.50686	3.27531	1.71163	0.199234	0.497198
hsa-miR-6873-3p	8.20112	2.13226	14.72	12.968	24.2407	13.1205	2.00945	1.0068	0.199935	0.497198
hsa-miR-548n	1.196	4.85272	6.6506	6.39091	7.00663	13.846	2.157	1.10903	0.200848	0.498312
hsa-miR-103a-1-5p	4.95485	14.4111	8.42409	53.6092	1.69515	11.1857	2.39449	1.25972	0.201618	0.499631
hsa-miR-4795-5p	3.07542	4.04393	9.22216	22.0062	7.17615	4.77658	2.09184	1.06477	0.202154	0.499776
hsa-miR-4800-5p	3.80156	10.3672	5.49783	5.62565	0.734567	2.53945	-2.18344	-1.1266	0.202047	0.499776
hsa-miR-1285-5p	1.15328	0.147052	0.709397	0.227508	2.59924	3.265	2.92995	1.55088	0.202539	0.50006
hsa-miR-425-5p	447.516	1129.73	968.948	69.1004	464.472	597.496	-2.25125	-1.17073	0.202746	0.50006
hsa-miR-4530	1.92214	0.514683	1.59614	3.0817	2.37321	3.50686	2.15479	1.10755	0.20526	0.504477
hsa-miR-11181-3p	5.97999	9.70544	5.49783	4.15719	3.10778	2.66037	-2.08927	-1.063	0.205132	0.504477
hsa-miR-5001-3p	6.96241	13.97	10.1976	28.9142	12.3746	19.5296	1.96386	0.973689	0.2051	0.504477
hsa-miR-4682	2.05028	0.147052	0.975421	6.24613	1.46913	0.241852	2.48394	1.31263	0.206418	0.506728
hsa-miR-4511	1.15328	5.66151	6.2959	4.34333	17.9686	6.40908	2.19574	1.13471	0.207409	0.507988
hsa-miR-4677-3p	0.51257	1.9852	0.620722	1.57187	3.10778	2.96269	2.44642	1.29067	0.207593	0.507988
hsa-miR-635	5.16842	4.48509	10.3749	13.2161	16.1605	8.76714	1.91872	0.940141	0.207659	0.507988
hsa-miR-9899	0.768855	0.36763	1.68482	2.81283	1.46913	1.93482	2.29594	1.19909	0.207952	0.508111
hsa-miR-6514-3p	20.7591	9.63192	8.15807	22.7508	33.7336	19.4086	1.95612	0.967992	0.210446	0.513606
hsa-miR-6730-5p	5.51013	2.72047	0.532048	14.271	2.93827	1.75343	2.15291	1.10629	0.210977	0.514304
hsa-miR-5684	21.4425	20.8814	11.5277	53.5678	38.819	21.283	2.10873	1.07637	0.211398	0.514729
hsa-miR-7976	3.20356	3.16162	2.57156	5.66702	2.31671	10.2787	2.03003	1.0215	0.213416	0.515448
hsa-miR-3621	16.3595	0.588209	1.0641	9.32783	17.6861	13.6042	2.24264	1.1652	0.213334	0.515448
hsa-miR-1301-5p	7.77398	0.294104	4.69975	2.29576	1.24311	1.87435	-2.35727	-1.23711	0.212971	0.515448
hsa-miR-6755-3p	48.566	23.896	39.4602	31.2927	16.556	5.44167	-2.09616	-1.06775	0.213085	0.515448
hsa-miR-1273h-3p	3.84428	2.20578	0.354698	3.53671	5.76352	5.13936	2.20275	1.1393	0.213305	0.515448
hsa-miR-1275	3.58799	1.91168	1.33012	4.13651	3.2773	7.1951	2.07373	1.05223	0.212161	0.515448
hsa-miR-4273	18.7515	1.83815	7.71469	4.94313	6.44158	2.59991	-2.02799	-1.02005	0.21245	0.515448
hsa-miR-3923	0.427142	4.04393	0.709397	0.124095	0.904082	0.60463	-3.22335	-1.68856	0.213668	0.515461
hsa-miR-6783-5p	83.0364	10.1466	14.5426	12.575	13.8438	24.6085	-2.11416	-1.08008	0.214491	0.516405
hsa-miR-891a-3p	2.81914	6.02914	3.28096	2.17167	2.2037	1.20926	-2.12583	-1.08803	0.214552	0.516405
hsa-miR-660-3p	10.2087	14.117	17.1142	6.97002	5.59401	10.8229	-1.77016	-0.823876	0.21525	0.517489
hsa-miR-6747-3p	13.9675	8.7496	13.2125	5.89452	5.70702	8.64622	-1.79312	-0.842469	0.215734	0.518058
hsa-miR-324-3p	3.37442	6.02914	10.3749	16.9183	7.51518	12.8786	1.90387	0.928932	0.216096	0.518213
hsa-miR-6513-5p	18.4952	3.52925	2.74891	46.5564	7.17615	3.74871	2.3155	1.21132	0.216293	0.518213
hsa-miR-1468-3p	0.768855	1.61757	1.59614	1.94416	3.61633	3.08362	2.20405	1.14016	0.216555	0.518247
hsa-miR-31-3p	212.46	742.025	807.471	29.7622	288.572	451.357	-2.28928	-1.1949	0.217043	0.518822
hsa-miR-6717-5p	65.8653	1.397	14.8973	9.96899	11.301	14.9344	-2.27136	-1.18356	0.217339	0.518937
hsa-miR-6799-5p	1.66585	0.147052	5.85252	6.59773	4.23788	5.80445	2.17892	1.12361	0.21836	0.519595
hsa-miR-4732-5p	4.61313	2.64694	7.0053	12.968	7.57169	7.37649	1.97465	0.9816	0.218607	0.519595
hsa-miR-5682	949.152	1225.24	1654.14	45.0466	704.562	982.222	-2.21074	-1.14453	0.218337	0.519595
hsa-miR-1260a	877.819	1775.14	2990.64	634.995	932.504	1141.3	-2.08343	-1.05896	0.217873	0.519595
hsa-miR-196a-5p	664.718	1030.69	1166.43	607.798	3017.32	2388.47	2.10129	1.07128	0.219484	0.520295
hsa-miR-455-5p	15.9324	18.2345	10.8183	3.70218	51.8152	38.515	2.08714	1.06153	0.219892	0.520295
hsa-miR-3660	3.71613	4.41157	0.620722	0.248191	2.59924	0.60463	-2.56865	-1.36101	0.219372	0.520295
hsa-miR-3135a	10.7213	14.4111	2.92626	3.14375	49.7245	9.25085	2.20916	1.1435	0.219895	0.520295
hsa-miR-3929	4.39956	3.3822	0.886746	12.8852	3.50332	1.1488	2.01708	1.01227	0.220641	0.521471
hsa-miR-3197	0.128143	0.514683	0.620722	0.144778	0.847577	3.14408	3.25772	1.70386	0.221049	0.521845
hsa-miR-122-5p	2.34928	5.22035	8.60144	6.10135	20.6809	6.22769	2.04677	1.03335	0.222056	0.523631
hsa-miR-7849-3p	1.75128	0	2.39421	5.52224	1.29962	3.20454	2.41368	1.27123	0.222868	0.523778
hsa-miR-4688	3.24628	4.33804	1.33012	2.35781	0.169515	1.33019	-2.27774	-1.1876	0.222657	0.523778
hsa-miR-6786-3p	0.213571	0	0.886746	0.144778	0.339031	3.44639	3.53823	1.82303	0.222537	0.523778
hsa-miR-8083	9.26898	10.2937	7.35999	3.84695	7.40217	1.81389	-2.06463	-1.04588	0.225755	0.526747
hsa-miR-10524-5p	1.196	2.49989	3.36964	4.01241	5.19847	5.0789	2.07916	1.056	0.225344	0.526747
hsa-miR-5002-5p	76.5438	9.77897	18.1783	20.4344	11.1315	17.3529	-2.13743	-1.09587	0.224794	0.526747
hsa-miR-4709-5p	12.3444	5.0733	5.5865	3.66081	6.27207	1.93482	-1.94929	-0.962946	0.226133	0.526747
hsa-miR-4650-5p	5.38199	4.55862	15.8728	9.84489	20.6809	16.8692	1.84047	0.880076	0.226144	0.526747
hsa-miR-1181	11.2765	5.3674	8.33541	6.43227	4.80293	1.33019	-1.97603	-0.982607	0.226078	0.526747
hsa-miR-4480	13.9675	6.83793	0.620722	7.54913	36.5588	3.74871	2.22557	1.15418	0.226123	0.526747
hsa-miR-3915	3.03271	1.17642	1.24144	1.50983	0.0565051	0.483704	-2.58056	-1.36769	0.224624	0.526747
hsa-miR-4721	0.0854284	0.0735261	3.63566	0.889349	0	0.120926	-3.60169	-1.84867	0.226528	0.527054
hsa-miR-5586-3p	4.8267	4.11746	2.48289	12.5543	3.50332	4.65565	1.81295	0.858337	0.227744	0.527111
hsa-miR-4514	2.86185	6.61735	2.83759	1.1789	1.35612	3.14408	-2.19763	-1.13595	0.22757	0.527111
hsa-miR-4716-5p	5.25384	4.26451	0.532048	2.39918	7.00663	12.3949	2.14687	1.10223	0.228372	0.527111
hsa-miR-215-3p	1.23871	4.92625	2.12819	1.79938	0.791072	0.906946	-2.29571	-1.19894	0.228566	0.527111
hsa-miR-6529-3p	5.04027	5.14683	7.98072	2.52327	2.31671	4.17195	-2.02489	-1.01785	0.228541	0.527111
hsa-miR-7854-3p	1.58042	0.808787	3.28096	5.25337	3.39031	2.84176	2.06844	1.04854	0.227445	0.527111
hsa-miR-6749-3p	19.3922	26.6164	28.4646	19.3382	7.34567	10.3996	-1.99363	-0.995397	0.228392	0.527111
hsa-miR-6765-5p	1.75128	2.57341	4.07903	4.61221	4.4639	7.43695	1.9979	0.998486	0.228033	0.527111
hsa-miR-4759	0.982426	5.73503	3.28096	1.7787	2.2037	0.181389	-2.37595	-1.2485	0.231051	0.529344
hsa-miR-8060	0.854284	9.19076	1.86217	5.83248	6.6111	11.7298	2.03021	1.02163	0.230488	0.529344
hsa-miR-4764-5p	7.8167	4.55862	7.09397	6.8666	1.92117	1.02787	-1.95864	-0.969853	0.230964	0.529344
hsa-miR-4271	12.1735	20.8814	1.0641	4.59152	10.0579	1.69297	-2.08931	-1.06302	0.230624	0.529344
hsa-miR-5007-3p	2.69099	4.7792	7.09397	3.70218	9.71888	16.4459	2.05233	1.03726	0.230789	0.529344
hsa-miR-3685	1.75128	4.92625	2.39421	0.868667	0.734567	2.2976	-2.35163	-1.23366	0.230012	0.529344
hsa-miR-4291	3.9297	2.57341	1.95084	1.73733	1.24311	0.846483	-2.16915	-1.11713	0.232222	0.531447
hsa-miR-518c-5p	3.50256	0.220578	4.61108	2.83351	4.91595	11.0043	2.24058	1.16387	0.232783	0.532147
hsa-miR-5002-3p	4.18599	6.32324	5.5865	3.74354	3.3338	0.120926	-2.22045	-1.15085	0.233379	0.532349
hsa-miR-4683	0.896998	0.441157	4.07903	2.83351	4.35089	4.23241	2.1289	1.09011	0.233155	0.532349
hsa-miR-431-3p	1.28143	10.2937	8.77879	18.4902	6.27207	15.4181	1.98086	0.98613	0.23413	0.533481
hsa-miR-28-3p	123.529	246.165	340.688	38.2627	117.135	181.994	-2.10588	-1.07442	0.235337	0.534443
hsa-miR-1243	1.66585	0.661735	2.57156	1.303	4.06837	5.32075	2.16521	1.1145	0.234935	0.534443
hsa-miR-6762-3p	1.53771	0.36763	1.24144	0.97208	3.50332	3.265	2.38446	1.25366	0.23546	0.534443
hsa-miR-5687	1.794	3.01457	1.77349	4.8604	3.16429	4.65565	1.96653	0.975649	0.235573	0.534443
hsa-miR-4436b-3p	3.45985	0.220578	4.34506	1.46846	0.734567	1.08833	-2.41781	-1.2737	0.236455	0.535759
hsa-miR-1233-5p	3.9297	7.94082	5.5865	2.62668	1.80816	3.99056	-2.06856	-1.04863	0.236665	0.535759
hsa-miR-4310	1.495	1.397	0.266024	0.847984	0.11301	0.060463	-2.89753	-1.53482	0.23712	0.535819
hsa-miR-6824-5p	1.96485	0.220578	2.57156	3.12306	2.88176	4.53473	2.20375	1.13996	0.237203	0.535819
hsa-miR-3175	1.36685	0.294104	0.532048	1.34437	4.57691	0.060463	2.65984	1.41134	0.238114	0.537295
hsa-miR-6765-3p	8.58555	12.8671	11.7937	7.56981	20.0028	36.3988	1.9213	0.942083	0.239772	0.539574
hsa-miR-6070	59.33	180.507	337.762	36.2565	130.64	122.438	-1.99643	-0.997419	0.239897	0.539574
hsa-miR-150-3p	3.07542	0.294104	5.14313	0.392968	0.22602	2.59991	-2.66198	-1.4125	0.239419	0.539574
hsa-miR-5582-3p	0.128143	1.32347	3.45831	4.17787	4.06837	2.41852	2.19978	1.13736	0.240575	0.54052
hsa-miR-4468	0.0427142	0.147052	1.0641	1.26164	2.2037	0.060463	2.85323	1.5126	0.240849	0.540556
hsa-miR-3912-3p	2.43471	4.99977	0.709397	1.46846	0.734567	1.33019	-2.29125	-1.19614	0.241841	0.540725
hsa-miR-483-5p	4.44227	2.27931	4.69975	3.82627	6.89362	11.9112	1.96394	0.97375	0.242067	0.540725
hsa-miR-5008-5p	49.8902	19.3374	15.6067	28.0248	5.08546	7.98112	-2.06121	-1.04349	0.242474	0.540725
hsa-miR-197-5p	1.96485	1.9852	0.709397	6.18408	2.09069	1.20926	2.03102	1.0222	0.241655	0.540725
hsa-miR-1200	13.3695	12.573	21.5479	42.0476	22.8846	25.2131	1.90814	0.932171	0.241979	0.540725
hsa-miR-4760-5p	0.726141	1.02937	0.620722	4.61221	1.0736	0	2.39024	1.25715	0.242428	0.540725
hsa-miR-4774-3p	19.8194	0	13.2125	4.79835	2.76875	6.40908	-2.3638	-1.24111	0.242756	0.540778
hsa-miR-561-5p	3.84428	6.69087	4.43373	3.74354	19.0987	6.0463	1.92462	0.944577	0.24419	0.543395
hsa-miR-548at-3p	1.794	1.6911	0.798072	2.31644	2.71225	4.29288	2.05922	1.0421	0.244797	0.543589
hsa-miR-3059-5p	5.97999	0.220578	8.15807	0.413651	2.93827	2.7813	-2.35164	-1.23367	0.244686	0.543589
hsa-miR-653-3p	2.52014	0.514683	5.85252	8.06619	4.18138	5.92538	2.05507	1.03919	0.24641	0.546592
hsa-miR-4260	1.32414	2.20578	2.57156	3.10238	4.4639	4.4138	2.00393	1.00283	0.248548	0.550752
hsa-miR-6845-3p	7.60312	11.0289	9.48818	3.0817	1.24311	9.85548	-1.98869	-0.991818	0.249568	0.552296
hsa-miR-3686	1.36685	5.58798	0.975421	0.992762	1.35612	1.08833	-2.30914	-1.20736	0.249773	0.552296
hsa-miR-216b-5p	1.495	0.0735261	1.68482	1.73733	4.57691	1.33019	2.32338	1.21623	0.254752	0.555029
hsa-miR-10523-5p	1.02514	1.76463	0.620722	2.52327	3.72934	1.02787	2.11938	1.08364	0.257318	0.555029
hsa-miR-181a-5p	12576	10907	11972	1156.32	9357.93	7247.16	-1.9962	-0.997255	0.257465	0.555029
hsa-miR-452-5p	2.60557	0.147052	4.25638	2.87487	5.76352	6.59047	2.16636	1.11527	0.257057	0.555029
hsa-miR-499b-5p	4.74127	0.0735261	3.28096	0.0413651	1.29962	1.57204	-2.80385	-1.48741	0.257048	0.555029
hsa-miR-4277	1.87942	2.49989	3.90168	5.64633	3.39031	6.7114	1.94281	0.958146	0.253279	0.555029
hsa-miR-132-5p	61.5511	47.4243	82.1127	53.3196	193.247	125.703	1.9476	0.961695	0.251921	0.555029
hsa-miR-3059-3p	0.854284	0.588209	2.39421	2.39918	3.2773	2.05574	2.07395	1.05238	0.25641	0.555029
hsa-miR-3921	8.37198	10.4407	9.66553	5.95657	4.4074	4.29288	-1.86319	-0.897775	0.253763	0.555029
hsa-miR-1180-5p	11.4474	2.05873	6.2959	0	1.41263	6.28816	-2.57902	-1.36682	0.257372	0.555029
hsa-miR-3616-3p	0.854284	0.661735	0.354698	1.4271	2.42972	1.08833	2.44038	1.2871	0.256029	0.555029
hsa-miR-6854-3p	0.0427142	0.147052	1.59614	2.606	0	2.35806	2.79248	1.48155	0.254553	0.555029
hsa-miR-139-3p	305.022	156.096	209.006	63.5781	99.1665	172.501	-2.00008	-1.00006	0.254706	0.555029
hsa-miR-1193	6.66341	0.36763	2.92626	10.9204	4.4639	3.56732	1.89353	0.92108	0.255574	0.555029
hsa-miR-3926	1.87942	6.91145	3.54698	1.40641	1.41263	3.20454	-2.05661	-1.04027	0.255934	0.555029
hsa-miR-328-5p	1.53771	1.32347	3.90168	0.434333	9.21033	5.50214	2.23514	1.16037	0.251972	0.555029
hsa-miR-503-3p	7.47498	1.54405	0.266024	7.03206	8.58878	4.29288	2.12081	1.08462	0.2534	0.555029
hsa-miR-4710	0.640713	0.147052	1.15277	2.91624	1.75166	0.060463	2.44416	1.28934	0.255803	0.555029
hsa-miR-656-5p	2.22114	0.514683	4.07903	4.34333	3.67283	5.74399	2.02483	1.0178	0.257635	0.555029
hsa-miR-6740-3p	1.87942	1.32347	6.6506	3.30921	6.55459	9.43224	1.96553	0.974917	0.252544	0.555029
hsa-miR-3152-3p	1.45228	1.6911	3.28096	1.55119	7.23265	4.35334	2.04491	1.03203	0.255413	0.555029
hsa-miR-6800-5p	2.30657	2.13226	3.63566	1.26164	0.508546	1.87435	-2.19222	-1.13239	0.251937	0.555029
hsa-miR-5585-3p	5.68099	0.220578	2.30554	12.2854	5.481	0.181389	2.17783	1.12289	0.256853	0.555029
hsa-miR-4677-5p	27.6788	23.6754	9.48818	12.4095	13.5612	6.77186	-1.85981	-0.895153	0.25322	0.555029
hsa-miR-6739-3p	109.177	14.117	22.2573	31.3134	24.3537	14.2693	-2.08173	-1.05778	0.254358	0.555029
hsa-miR-512-5p	1.40957	1.54405	5.32048	3.20579	0.0565051	0.120926	-2.39706	-1.26127	0.260001	0.556737
hsa-miR-4464	1.196	4.70567	1.0641	5.50156	6.15906	2.23713	2.00004	1.00003	0.260023	0.556737
hsa-miR-4698	3.45985	3.3822	1.24144	9.26578	3.05128	3.32547	1.92985	0.948487	0.259201	0.556737
hsa-miR-520g-3p	4.39956	15.8816	8.24674	2.91624	4.4074	7.73927	-1.89948	-0.925601	0.259803	0.556737
hsa-miR-6508-5p	0	1.54405	1.24144	2.41986	2.2037	1.93482	2.37652	1.24885	0.259751	0.556737
hsa-miR-3136-5p	15.5052	5.0733	7.53734	6.49432	21.2459	23.5806	1.81451	0.859578	0.259893	0.556737
hsa-miR-518a-3p	1.66585	5.51446	1.95084	2.08894	1.41263	0.906946	-2.02375	-1.01703	0.261485	0.55713
hsa-miR-7515	17.342	1.24994	6.02987	5.48087	3.22079	3.62778	-1.99902	-0.999293	0.261537	0.55713
hsa-miR-5589-5p	13.7967	10.2201	12.8578	33.3816	15.0304	20.1947	1.86434	0.898667	0.261474	0.55713
hsa-miR-633	5.85184	1.10289	2.39421	2.19235	0.565051	1.75343	-2.07032	-1.04985	0.261529	0.55713
hsa-miR-640	15.8042	4.85272	4.43373	7.03206	4.4639	1.33019	-1.95261	-0.9654	0.261155	0.55713
hsa-miR-6732-3p	2.69099	1.6911	4.8771	3.5574	8.36276	5.5626	1.88973	0.918179	0.262404	0.558408
hsa-miR-3074-3p	1.196	0.220578	1.15277	1.303	1.1301	3.62778	2.29727	1.19992	0.262791	0.558665
hsa-miR-6751-5p	1.87942	1.17642	1.77349	1.96484	4.97245	2.96269	1.99566	0.996863	0.264126	0.560933
hsa-miR-7844-5p	1.794	1.76463	2.74891	3.68149	5.82003	2.72084	1.95864	0.969851	0.265588	0.561255
hsa-miR-4485-3p	9.9524	9.48487	13.1238	9.121	5.98954	3.9301	-1.6829	-0.750952	0.265604	0.561255
hsa-miR-580-5p	5.16842	2.35283	11.3504	14.6226	10.9055	9.55316	1.86841	0.90181	0.265618	0.561255
hsa-miR-106b-3p	10.0805	21.0285	26.9571	3.47467	13.6177	16.2041	-1.74685	-0.804753	0.265143	0.561255
hsa-miR-1286	3690.38	8243.52	2910.3	4476.7	1594.69	1539.21	-1.95043	-0.963794	0.265553	0.561255
hsa-miR-214-3p	899.732	318.441	108.981	261.779	201.554	218.816	-1.94569	-0.960282	0.266433	0.56241
hsa-miR-759	3.11814	2.20578	0.532048	4.79835	0.678061	6.89279	2.0871	1.0615	0.268606	0.56246
hsa-miR-339-5p	23.0229	29.1899	15.9614	7.59049	14.7478	16.5669	-1.76258	-0.817688	0.267278	0.56246
hsa-miR-4485-5p	26.6109	9.19076	13.1238	8.56257	6.89362	11.8508	-1.80011	-0.848084	0.268271	0.56246
hsa-miR-20b-3p	7.77398	3.0881	1.0641	12.182	3.10778	6.34862	1.80187	0.849494	0.268043	0.56246
hsa-miR-4670-3p	2.69099	8.1614	5.2318	20.1241	3.39031	5.92538	1.83949	0.879308	0.266804	0.56246
hsa-miR-6878-5p	8.62826	6.83793	9.75421	6.14272	2.48623	4.65565	-1.86972	-0.902821	0.267857	0.56246
hsa-miR-6740-5p	4.86942	2.57341	2.39421	6.515	6.83712	4.77658	1.7933	0.842619	0.26856	0.56246
hsa-miR-579-3p	3.67342	1.9852	1.0641	2.70941	5.08546	6.22769	2.0178	1.01278	0.267279	0.56246
hsa-miR-6777-5p	8.62826	10.0731	8.95614	5.08791	23.9582	17.8971	1.69181	0.758566	0.268947	0.562613
hsa-miR-6507-3p	4.61313	9.04371	2.66024	3.06102	2.42972	3.32547	-1.85132	-0.88855	0.269433	0.563067
hsa-miR-3189-3p	3.75885	5.3674	6.2959	6.61841	11.6966	8.3439	1.73799	0.797419	0.270351	0.563148
hsa-miR-139-5p	22258	9025.4	5790.9	962.772	9167.28	8136.09	-2.02968	-1.02126	0.269963	0.563148
hsa-miR-486-3p	3.33171	7.57319	9.13349	1.4271	4.12487	4.65565	-1.97391	-0.981059	0.270548	0.563148
hsa-miR-6795-5p	7.26141	0.147052	5.5865	1.59256	3.16429	1.33019	-2.14033	-1.09783	0.27051	0.563148
hsa-miR-7158-5p	1.32414	1.02937	3.19229	1.63392	0.282526	0.362778	-2.30448	-1.20444	0.271647	0.564875
hsa-miR-2909	0.597999	1.61757	1.41879	3.32989	4.68992	0.060463	2.22685	1.15501	0.272415	0.565909
hsa-miR-412-3p	2.22114	0.147052	1.59614	3.41262	3.78584	1.08833	2.06611	1.04692	0.273456	0.56751
hsa-miR-450b-3p	38.5282	9.8525	8.42409	11.9545	6.49809	12.0321	-1.86685	-0.900604	0.274529	0.569172
hsa-miR-371a-5p	1.23871	0.735261	0.354698	1.55119	1.75166	2.41852	2.16381	1.11357	0.276423	0.571122
hsa-miR-574-5p	142.751	237.342	271.61	182.875	436.898	633.532	1.92311	0.943444	0.276543	0.571122
hsa-miR-1292-5p	60.0989	51.9094	55.0669	28.1489	29.5522	32.771	-1.86908	-0.902328	0.276561	0.571122
hsa-miR-9901	7.04784	3.3822	2.92626	9.86557	5.70702	7.8602	1.73047	0.791168	0.276188	0.571122
hsa-miR-7113-5p	2.56285	2.35283	7.09397	6.39091	10.6795	4.77658	1.83336	0.874493	0.277119	0.571712
hsa-miR-2682-3p	10.2941	16.2493	17.8236	10.362	5.65051	9.61362	-1.71497	-0.778181	0.277931	0.572822
hsa-miR-5006-5p	18.4525	0.294104	3.01494	3.64013	2.14719	4.29288	-2.16376	-1.11354	0.279355	0.574626
hsa-miR-5590-5p	3.24628	2.20578	0.798072	1.22027	0.904082	0.846483	-2.12065	-1.08451	0.279128	0.574626
hsa-miR-3927-3p	123.316	228.299	37.6867	18.2627	104.534	76.1834	-1.95716	-0.96876	0.279951	0.575286
hsa-miR-217-3p	25.4577	4.19099	12.1484	17.0631	33.7901	28.2967	1.88699	0.916086	0.280905	0.575315
hsa-miR-6847-5p	2.00757	9.70544	0.177349	2.33713	1.58214	1.57204	-2.15875	-1.1102	0.28092	0.575315
hsa-miR-3194-5p	2.86185	4.19099	2.92626	3.97105	0.169515	0.362778	-2.17454	-1.12071	0.281008	0.575315
hsa-miR-4525	0.341713	2.94104	3.01494	3.59876	2.82526	6.16723	2.01696	1.01218	0.281338	0.575315
hsa-miR-518a-5p	5.21113	1.83815	4.69975	3.39194	2.03418	0.241852	-2.05037	-1.03588	0.281315	0.575315
hsa-miR-934	1.23871	1.9852	0.620722	3.92968	0.282526	3.56732	2.01501	1.01079	0.281751	0.575596
hsa-miR-3648	6.0227	0.955839	12.6805	25.8118	6.38508	7.01371	1.99834	0.998801	0.282673	0.576917
hsa-miR-4264	4.14328	1.397	5.49783	7.4664	9.04082	4.23241	1.88081	0.91135	0.283079	0.577183
hsa-miR-6741-3p	212.375	17.8668	18.9764	57.725	24.5797	44.3194	-1.96854	-0.977126	0.28349	0.577459
hsa-miR-569	1.15328	0	0.0886746	0.930714	2.59924	0.060463	2.7523	1.46064	0.284552	0.579059
hsa-miR-4499	7.26141	11.5436	7.44867	2.27508	4.12487	7.79973	-1.86668	-0.900472	0.285957	0.581354
hsa-miR-4738-5p	8.54284	0.147052	0.177349	3.16443	0.0565051	0	-2.73433	-1.45119	0.286447	0.581784
hsa-miR-642b-5p	7.04784	8.60255	2.21687	3.47467	2.59924	3.68825	-1.83807	-0.878195	0.288509	0.585405
hsa-miR-9-5p	14.5228	9.70544	51.1653	10.9204	11.7531	19.0459	-1.8061	-0.852879	0.289299	0.586439
hsa-miR-2681-3p	1.32414	4.11746	8.42409	1.98552	2.37321	2.7813	-1.92952	-0.948245	0.290183	0.587662
hsa-miR-655-5p	2.26385	5.0733	3.81301	3.30921	10.3404	7.01371	1.85164	0.888806	0.29102	0.588789
hsa-miR-7160-3p	3.84428	2.72047	4.25638	0.97208	1.0736	3.44639	-2.01004	-1.00722	0.292653	0.59152
hsa-miR-508-5p	6.44984	1.54405	3.99036	4.50879	1.01709	0.302315	-2.03281	-1.02347	0.293584	0.59226
hsa-miR-129-5p	8.07298	6.61735	12.2371	31.21	13.0527	4.53473	1.81714	0.861673	0.293427	0.59226
hsa-miR-4536-5p	125.409	231.681	269.837	49.5347	140.811	142.028	-1.88665	-0.91583	0.293929	0.592384
hsa-miR-548g-3p	2.90456	7.49966	0.886746	9.80353	5.76352	5.0789	1.82766	0.87	0.294757	0.593481
hsa-miR-6865-3p	2.43471	3.16162	9.04481	3.24716	1.1301	3.08362	-1.93708	-0.953881	0.297608	0.596487
hsa-miR-6798-5p	1.75128	0.294104	0.443373	0.806619	3.89885	1.39065	2.33638	1.22427	0.297958	0.596487
hsa-miR-4653-3p	0.213571	0.220578	1.0641	1.71665	1.41263	0.302315	2.39536	1.26024	0.296653	0.596487
hsa-miR-585-3p	0.170857	0.588209	2.12819	6.12203	0.282526	0.120926	2.28208	1.19035	0.297521	0.596487
hsa-miR-4665-3p	252.056	127.274	44.3373	70.5068	69.3318	83.5599	-1.89724	-0.923901	0.296946	0.596487
hsa-miR-1263	11.6183	9.26429	15.7841	4.05378	6.32857	10.702	-1.75065	-0.807888	0.297956	0.596487
hsa-miR-4418	2.39199	1.76463	0.620722	0.206825	3.89885	6.65094	2.21697	1.14859	0.299282	0.598564
hsa-miR-1248	1.92214	4.63214	8.60144	8.93486	11.2445	5.68353	1.7218	0.783916	0.299708	0.598844
hsa-miR-4448	3.9297	6.7644	2.30554	2.606	3.10778	0.967409	-1.93575	-0.952896	0.300285	0.599426
hsa-miR-1306-3p	8.92726	10.6613	14.72	7.30094	5.70702	7.67881	-1.63499	-0.70928	0.301607	0.60149
hsa-miR-4796-3p	2.43471	15.9552	14.5426	7.01138	3.39031	7.43695	-1.83928	-0.87914	0.302196	0.602092
hsa-miR-4520-2-3p	3.37442	8.01434	4.07903	16.091	2.82526	8.40436	1.77332	0.826455	0.302605	0.602333
hsa-miR-4645-5p	1.02514	0.147052	0.266024	0.0620476	1.80816	2.23713	2.71243	1.43959	0.303123	0.60251
hsa-miR-10396b-5p	4.2287	4.26451	15.3407	5.14995	3.61633	3.80917	-1.8778	-0.90904	0.303269	0.60251
hsa-miR-4691-3p	15.9324	2.72047	8.77879	2.81283	8.36276	4.05102	-1.81203	-0.857605	0.303804	0.60281
hsa-miR-196b-3p	4.78399	1.6911	2.03952	0.889349	1.75166	1.81389	-1.98895	-0.992007	0.303996	0.60281
hsa-miR-6883-3p	1.87942	6.02914	2.21687	5.93589	7.6847	4.11149	1.75806	0.813984	0.30583	0.605872
hsa-miR-4786-5p	7.64584	2.86752	1.33012	10.2379	5.93304	4.35334	1.71673	0.779663	0.306725	0.606704
hsa-miR-489-5p	0.854284	0.147052	2.66024	5.54292	1.0736	0.906946	2.07839	1.05547	0.306922	0.606704
hsa-miR-498-5p	2.94728	3.3822	0.798072	4.28129	3.95536	5.38121	1.86862	0.901976	0.307119	0.606704
hsa-miR-218-5p	178.716	343.44	575.055	121.2	719.875	1266.28	1.92064	0.941584	0.307641	0.607162
hsa-miR-7114-5p	3.03271	7.20556	3.81301	2.39918	4.18138	0.60463	-1.94872	-0.96253	0.308048	0.607395
hsa-miR-4446-3p	18.7088	39.7041	51.52	13.3196	11.188	35.3709	-1.8364	-0.876879	0.308369	0.607455
hsa-miR-6832-5p	2.98999	0.661735	0.620722	0.206825	0.452041	1.20926	-2.39633	-1.26083	0.308701	0.607538
hsa-miR-7977	41.1765	61.9825	211.578	438.16	84.8142	96.1362	1.96762	0.976454	0.310624	0.609603
hsa-miR-4520-3p	2.77642	2.72047	10.8183	5.25337	1.97768	1.33019	-1.87752	-0.908828	0.310588	0.609603
hsa-miR-4265	2.73371	9.70544	6.82795	2.66805	14.8043	16.5064	1.76219	0.817373	0.310333	0.609603
hsa-miR-25-3p	2520.39	9598.61	12153.6	3170.86	5198.47	4888.62	-1.83079	-0.872466	0.312813	0.613325
hsa-miR-2278	2.05028	3.74983	2.83759	3.01965	1.1301	0	-2.05284	-1.03762	0.313379	0.613859
hsa-miR-7112-3p	0.939712	0.0735261	0.177349	2.23371	0.791072	0	2.45487	1.29565	0.314308	0.614686
hsa-miR-4281	9.22626	2.49989	6.56192	15.6981	6.10255	10.581	1.76618	0.82063	0.314388	0.614686
hsa-miR-1245b-3p	2.73371	0.0735261	0.620722	0.992762	6.15906	0.725557	2.24768	1.16844	0.315129	0.615539
hsa-miR-489-3p	2.43471	0.294104	0.354698	2.89556	2.09069	1.33019	1.97676	0.983136	0.315412	0.615539
hsa-miR-6804-3p	0.128143	0.441157	2.30554	2.85419	0.791072	2.23713	2.09148	1.06452	0.316467	0.617023
hsa-miR-3934-5p	9.09812	1.83815	1.50747	8.43848	6.15906	7.67881	1.76867	0.822668	0.316987	0.617462
hsa-miR-6779-3p	2.77642	1.17642	6.20722	4.0331	5.65051	8.8276	1.82542	0.868232	0.318471	0.619274
hsa-miR-499a-5p	3.88699	11.2495	11.7937	9.86557	10.0014	25.4549	1.68558	0.753243	0.318509	0.619274
hsa-miR-8075	3.67342	0.882313	2.83759	3.10238	3.16429	7.73927	1.86697	0.900699	0.320421	0.622283
hsa-miR-3144-3p	0.0854284	1.10289	0.0886746	2.19235	0.791072	0.120926	2.44533	1.29003	0.320651	0.622283
hsa-miR-450a-2-3p	6.70613	4.04393	4.52241	3.4333	4.06837	0.906946	-1.81119	-0.856935	0.321092	0.622562
hsa-let-7a-5p	95324.4	156563	118030	22430.3	101030	83797.1	-1.78482	-0.83578	0.321809	0.623375
hsa-miR-6856-3p	4.44227	0.220578	5.67518	3.04033	0.791072	1.26972	-2.00906	-1.00652	0.322117	0.623395
hsa-miR-4796-5p	1.45228	1.10289	0.354698	0.0413651	0.11301	1.02787	-2.57436	-1.36421	0.322524	0.623607
hsa-miR-377-5p	165.945	308.515	35.1151	45.0673	191.722	32.65	-1.89149	-0.919521	0.323544	0.625002
hsa-miR-5007-5p	1.83671	0.36763	0.266024	1.53051	2.31671	1.57204	2.05273	1.03754	0.324719	0.626692
hsa-miR-10b-3p	6.70613	3.82336	3.81301	2.75078	2.65574	2.72084	-1.80876	-0.854997	0.325243	0.627126
hsa-miR-423-3p	2486.82	5662.46	7099.38	818.243	3672.78	3775.49	-1.84464	-0.883341	0.326577	0.629119
hsa-miR-6809-5p	1.83671	5.66151	7.80337	1.15822	3.95536	3.20454	-1.8446	-0.883305	0.328661	0.632552
hsa-miR-890	12.6861	1.91168	18.799	16.1117	13.7872	29.2641	1.77062	0.824257	0.329831	0.633442
hsa-miR-126-5p	1629.85	2632.45	2319.02	156.008	1070.66	2303.28	-1.86446	-0.898756	0.329977	0.633442
hsa-miR-676-3p	12.6007	13.6759	1.15277	24.6536	13.5612	12.7577	1.85458	0.89109	0.330031	0.633442
hsa-miR-6849-3p	5.33927	10.4407	10.0202	20.6205	12.4876	10.0369	1.68852	0.75576	0.330513	0.633785
hsa-miR-548c-3p	3.37442	0.0735261	0.798072	4.11583	0.282526	4.4138	2.04718	1.03364	0.331267	0.63465
hsa-miR-3692-5p	7.13327	10.2201	6.82795	6.78387	3.05128	4.11149	-1.7036	-0.768591	0.331843	0.635173
hsa-miR-3186-5p	1.11057	1.10289	2.83759	3.909	3.72934	1.39065	1.83195	0.873382	0.334732	0.6396
hsa-miR-331-3p	51.2143	81.3934	42.3865	13.8987	30.7388	55.8679	-1.74338	-0.801889	0.334767	0.6396
hsa-miR-1246	12.2163	15.9552	6.20722	8.12824	8.36276	5.38121	-1.5723	-0.652879	0.337586	0.642316
hsa-miR-4297	15.249	16.4698	4.34506	12.3475	5.93304	3.265	-1.66923	-0.739182	0.337722	0.642316
hsa-miR-2115-5p	5.89456	7.79377	5.85252	4.01241	2.31671	4.89751	-1.73177	-0.792249	0.336562	0.642316
hsa-miR-760	61.8074	109.48	42.7412	30.9618	64.8114	22.6132	-1.80851	-0.854802	0.33747	0.642316
hsa-miR-6892-5p	5.7237	0.220578	4.8771	3.86764	8.36276	8.04159	1.86355	0.898052	0.337089	0.642316
hsa-miR-599	33.6161	6.39677	6.47325	16.0083	7.6847	2.23713	-1.79168	-0.841315	0.340248	0.646532
hsa-miR-6125	178.46	100.584	46.1995	70.0725	48.1424	71.7092	-1.71327	-0.776755	0.340654	0.646717
hsa-miR-21-5p	119735	581433	654125	30798.9	336050	367144	-1.84646	-0.884765	0.341121	0.647017
hsa-miR-4640-3p	1.62314	2.64694	5.14313	8.23165	2.71225	5.13936	1.73719	0.796756	0.343862	0.651037
hsa-miR-3198	7.04784	9.26429	3.81301	6.1634	4.80293	0.725557	-1.71346	-0.776909	0.343609	0.651037
hsa-miR-3940-3p	7.26141	6.32324	2.74891	15.8015	4.18138	7.61834	1.68715	0.754591	0.345096	0.652096
hsa-miR-4707-3p	7.73127	0.147052	3.99036	1.59256	0.11301	4.05102	-2.06763	-1.04798	0.344913	0.652096
hsa-miR-7856-5p	0.427142	2.94104	0.266024	2.39918	2.82526	1.87435	1.9533	0.965911	0.345356	0.652096
hsa-miR-8078	91.3229	283.958	262.566	104.385	89.2216	167.18	-1.76774	-0.821908	0.345675	0.652111
hsa-miR-4730	28.2768	2.35283	2.57156	7.61118	7.79771	3.265	-1.78119	-0.832844	0.346415	0.65292
hsa-miR-6741-5p	81.3278	114.774	177.881	66.1841	88.0915	69.6534	-1.66928	-0.739227	0.346729	0.652923
hsa-miR-186-3p	2.60557	2.13226	0.975421	3.47467	0.621556	6.7114	1.86945	0.902612	0.347525	0.653248
hsa-miR-144-5p	1.58042	2.94104	4.16771	4.94313	4.12487	5.19982	1.69529	0.761536	0.347289	0.653248
hsa-miR-4326	4.91213	1.6911	3.28096	14.8087	2.54273	0.60463	1.81688	0.861466	0.347883	0.653334
hsa-miR-548ac	1.40957	3.01457	2.39421	3.88832	2.2037	5.98584	1.78768	0.838091	0.348215	0.653371
hsa-miR-662	3.75885	0.147052	3.28096	2.33713	6.44158	4.95797	1.8962	0.92311	0.349835	0.655237
hsa-miR-671-5p	18.7515	59.9973	27.1344	4.67425	32.4904	24.0643	-1.73094	-0.791559	0.349758	0.655237
hsa-miR-6879-3p	2.98999	1.24994	5.49783	2.06825	2.82526	0.241852	-1.88283	-0.9129	0.350511	0.655915
hsa-miR-551a	2.17842	3.16162	1.50747	0.0620476	1.1301	1.99528	-2.1873	-1.12915	0.351745	0.656207
hsa-miR-4449	4.65585	7.57319	23.6761	11.1686	4.68992	5.32075	-1.68441	-0.75224	0.35145	0.656207
hsa-miR-3181	11.7464	12.2053	14.454	17.2492	28.7046	18.7435	1.68376	0.751683	0.35192	0.656207
hsa-miR-647	10.5077	14.9258	10.3749	19.3382	22.602	18.3808	1.68748	0.754872	0.351468	0.656207
hsa-miR-3655	1.58042	4.41157	4.61108	9.26578	3.50332	4.47427	1.65226	0.724438	0.35404	0.657234
hsa-miR-4672	1.70857	1.54405	4.25638	1.53051	0.22602	1.99528	-1.97763	-0.983776	0.353242	0.657234
hsa-miR-5696	3.9297	2.64694	3.63566	7.19753	2.42972	6.83232	1.61261	0.689397	0.353762	0.657234
hsa-miR-202-5p	2.81914	3.74983	1.41879	2.85419	1.24311	0.181389	-1.83575	-0.876373	0.35393	0.657234
hsa-miR-2355-3p	29.6864	5.29388	4.34506	13.7746	7.28916	1.69297	-1.72764	-0.788799	0.353934	0.657234
hsa-miR-509-3p	3.50256	1.54405	7.44867	8.70735	3.2773	9.4927	1.72638	0.787748	0.355539	0.659432
hsa-miR-6882-5p	2.81914	4.11746	6.91662	10.7342	6.44158	4.23241	1.56952	0.65032	0.356303	0.659656
hsa-miR-4280	3.84428	16.6169	9.57686	19.2761	12.2051	18.3203	1.66362	0.734323	0.357399	0.659656
hsa-miR-1322	1.36685	0.147052	0.354698	2.19235	1.52564	0.241852	2.05105	1.03636	0.357859	0.659656
hsa-miR-4328	2.98999	1.54405	3.63566	2.64737	0.678061	1.02787	-1.8167	-0.861323	0.357218	0.659656
hsa-miR-3128	0.298999	0.661735	1.86217	2.17167	0.0565051	3.68825	2.10698	1.07517	0.358495	0.659656
hsa-miR-2277-3p	0.128143	0	2.12819	0.206825	0.11301	5.50214	2.57238	1.36311	0.358463	0.659656
hsa-miR-4454	9.56798	4.55862	16.9369	35.8635	12.8832	4.71612	1.72453	0.7862	0.357708	0.659656
hsa-miR-6084	0.768855	0.0735261	2.21687	2.50259	1.69515	1.69297	1.95298	0.965678	0.35816	0.659656
hsa-miR-744-3p	70.692	131.832	205.104	15.9669	114.084	96.1362	-1.80254	-0.850029	0.356563	0.659656
hsa-miR-552-3p	8.20112	6.61735	5.40915	27.2182	6.04605	2.41852	1.7658	0.820324	0.359972	0.661688
hsa-miR-3160-5p	3.58799	2.94104	1.86217	1.86143	0.734567	2.11621	-1.78792	-0.838285	0.360547	0.661688
hsa-miR-6881-3p	3.88699	8.4555	2.57156	17.7456	4.74643	2.90223	1.70736	0.771766	0.360261	0.661688
hsa-miR-7705	9.65341	10.4407	6.6506	16.2978	14.5218	12.5159	1.6137	0.690368	0.361264	0.661843
hsa-miR-6892-3p	4.44227	2.49989	9.75421	3.4333	2.54273	3.56732	-1.73511	-0.795028	0.360998	0.661843
hsa-miR-5583-3p	1.87942	2.86752	5.05445	0.103413	0.734567	3.99056	-2.04365	-1.03115	0.364887	0.667896
hsa-miR-208a-5p	154.54	755.113	107.917	44.9225	443.113	52.3005	-1.8833	-0.913261	0.365208	0.6679
hsa-miR-7851-3p	21.1862	35.2925	10.3749	12.2441	21.2459	6.59047	-1.66896	-0.738951	0.365727	0.668061
hsa-miR-4687-3p	4.39956	2.05873	8.69011	13.2782	6.04605	5.86492	1.67439	0.743632	0.365934	0.668061
hsa-miR-4747-3p	10.3368	0.0735261	4.61108	21.3237	0.904082	6.83232	1.93093	0.949296	0.366966	0.669361
hsa-miR-6753-3p	10.4223	7.72024	6.38457	23.2058	10.7925	7.25557	1.68281	0.750868	0.369062	0.672599
hsa-miR-4999-5p	0.51257	2.94104	2.39421	9.53465	1.01709	0.181389	1.84601	0.884411	0.369829	0.67341
hsa-miR-4253	2.77642	3.0881	3.99036	6.61841	6.83712	2.90223	1.68468	0.752471	0.370216	0.673529
hsa-miR-1537-5p	1.87942	2.35283	0.798072	1.44778	0.0565051	0.906946	-2.04719	-1.03364	0.372179	0.676203
hsa-miR-492	5.89456	1.24994	4.34506	8.89349	3.22079	7.1951	1.67404	0.743336	0.372332	0.676203
hsa-miR-6884-3p	0.298999	1.6911	0.443373	0.0413651	0	0.967409	-2.46059	-1.299	0.373879	0.677251
hsa-miR-3162-3p	7.60312	0.147052	2.03952	1.53051	10.1144	7.07418	1.89589	0.922878	0.373305	0.677251
hsa-miR-1229-5p	6.19356	3.23515	4.34506	9.63807	7.79771	4.05102	1.55577	0.637625	0.373632	0.677251
hsa-miR-5196-3p	3.16085	4.7792	7.98072	2.02689	5.5375	1.39065	-1.77635	-0.828914	0.374535	0.677853
hsa-miR-3942-5p	0.811569	0.0735261	0.266024	0.765254	0.11301	1.93482	2.29773	1.20021	0.37524	0.678543
hsa-miR-4694-3p	8.50012	9.77897	9.22216	11.9545	22.9411	9.61362	1.61631	0.692704	0.377608	0.681647
hsa-miR-3911	74.2372	5.95561	3.19229	6.43227	34.1856	3.56732	-1.88901	-0.917627	0.377603	0.681647
hsa-miR-4712-3p	255.858	541.887	152.964	591.024	343.947	661.587	1.6793	0.747858	0.378879	0.683352
hsa-miR-659-3p	33.6161	5.88209	3.45831	28.9556	22.8846	22.1899	1.71828	0.780962	0.379364	0.683638
hsa-miR-574-3p	56.7671	87.349	122.726	54.6433	173.923	209.021	1.63982	0.713541	0.379748	0.683743
hsa-miR-548ao-3p	2.69099	0.955839	7.35999	6.37022	6.10255	6.10677	1.69801	0.763844	0.381429	0.686179
hsa-miR-18a-3p	14.5655	19.7785	14.8087	9.45192	13.3352	8.70668	-1.56401	-0.645249	0.382063	0.686729
hsa-miR-12115	9.61069	4.04393	1.59614	3.66081	3.2773	2.35806	-1.65168	-0.723933	0.382571	0.687054
hsa-miR-3682-3p	3.33171	4.04393	1.77349	3.35057	0.847577	0.967409	-1.7313	-0.791853	0.383369	0.687897
hsa-miR-1279	1.15328	4.19099	0.354698	1.82006	0.847577	0.181389	-1.96472	-0.974322	0.383887	0.688087
hsa-miR-4425	17.4274	5.58798	7.80337	10.8583	17.3471	20.7388	1.57577	0.656061	0.384238	0.688087
hsa-miR-145-5p	4.31413	0.220578	0.177349	3.12306	6.27207	0.181389	2.00436	1.00314	0.384461	0.688087
hsa-miR-4716-3p	1.75128	3.97041	1.68482	0.124095	3.16429	0.241852	-2.11466	-1.08042	0.386575	0.690102
hsa-miR-769-5p	1.794	0.294104	8.95614	4.52948	4.74643	10.6415	1.8067	0.853355	0.385974	0.690102
hsa-miR-6503-3p	3.16085	8.82313	6.2959	7.09411	2.14719	1.57204	-1.66657	-0.736882	0.386352	0.690102
hsa-miR-4800-3p	1.53771	4.19099	1.86217	5.00518	5.31148	2.05574	1.64382	0.717056	0.387366	0.690923
hsa-miR-516a-5p	1.92214	0.147052	2.57156	0.16546	1.58214	0.423241	-2.16629	-1.11523	0.388098	0.69164
hsa-miR-6499-5p	2.77642	5.66151	2.92626	3.88832	0.11301	2.23713	-1.80601	-0.852804	0.389267	0.691884
hsa-miR-208a-3p	2.94728	1.32347	3.36964	2.9576	1.0736	0.241852	-1.74993	-0.8073	0.389759	0.691884
hsa-miR-3924	2.13571	1.9852	0.532048	2.52327	3.44681	2.17667	1.6802	0.748635	0.389887	0.691884
hsa-miR-7111-3p	3.88699	2.64694	3.28096	0.16546	3.78584	1.26972	-1.90126	-0.926957	0.389576	0.691884
hsa-miR-6738-3p	42.287	17.7933	24.4742	22.3371	19.4378	10.7624	-1.60931	-0.686441	0.388673	0.691884
hsa-miR-154-5p	20.8445	144.185	235.52	40.8894	313.547	363.141	1.79152	0.841187	0.390654	0.692659
hsa-miR-4781-3p	13.1987	4.92625	27.3118	11.2306	6.83712	10.0369	-1.61264	-0.689426	0.392263	0.694923
hsa-miR-6132	19.8621	54.0417	9.75421	33.3816	9.66237	5.13936	-1.73335	-0.793563	0.392774	0.69524
hsa-miR-586	2.98999	1.54405	4.25638	1.05481	2.2602	1.75343	-1.76556	-0.820125	0.393206	0.695252
hsa-miR-4648	0.939712	0.147052	3.19229	0.723889	1.0736	0.181389	-2.12902	-1.09019	0.393777	0.695252
hsa-miR-507	5.08299	8.30845	4.16771	14.9328	8.64528	3.32547	1.53773	0.620804	0.393716	0.695252
hsa-miR-1184	5.63827	1.91168	1.59614	5.5636	3.55982	6.22769	1.64443	0.717584	0.394546	0.695436
hsa-miR-1298-5p	3.24628	0.36763	1.50747	3.32989	1.80816	4.11149	1.77017	0.82389	0.394222	0.695436
hsa-miR-6861-3p	4.65585	3.6763	2.12819	2.87487	1.86467	1.39065	-1.68764	-0.755007	0.396556	0.698392
hsa-miR-6736-3p	4.57042	3.3822	6.73927	2.9576	3.44681	2.2976	-1.66467	-0.735232	0.39784	0.700065
hsa-miR-4490	1.15328	0.0735261	2.12819	1.84075	3.61633	0.906946	1.89524	0.922377	0.398462	0.700571
hsa-miR-3149	34.5131	3.3822	3.90168	12.7611	8.53227	3.9301	-1.6585	-0.729879	0.399634	0.702041
hsa-miR-5000-5p	0.213571	3.6763	1.15277	2.7301	4.52041	1.51158	1.74419	0.802561	0.401519	0.702848
hsa-miR-3126-3p	11.2765	3.52925	4.96578	7.90073	14.2958	7.92066	1.50751	0.59217	0.401221	0.702848
hsa-miR-361-3p	0.854284	0.0735261	4.61108	0.620476	4.91595	5.26029	1.94912	0.962823	0.401213	0.702848
hsa-miR-26a-1-3p	0.768855	0.147052	3.54698	0.248191	4.74643	3.9301	1.99778	0.998399	0.401811	0.702848
hsa-miR-550b-3p	1.45228	0.0735261	1.15277	3.26784	1.01709	0.60463	1.81931	0.86339	0.402107	0.702848
hsa-miR-375-3p	88.8882	12.6465	13.3012	24.5502	30.9083	13.1809	-1.67441	-0.743652	0.400479	0.702848
hsa-miR-3192-5p	3.11814	4.70567	4.78843	4.40538	1.29962	1.69297	-1.65587	-0.727589	0.403069	0.703128
hsa-miR-517a-3p	2.34928	0.294104	2.21687	1.22027	1.01709	0.181389	-1.98121	-0.986384	0.403294	0.703128
hsa-miR-3161	5.80913	0.147052	0.177349	6.24613	4.80293	0.60463	1.88137	0.911786	0.402983	0.703128
hsa-miR-568	7.77398	0.0735261	1.24144	4.05378	0.0565051	0.302315	-2.0496	-1.03534	0.40361	0.703128
hsa-miR-221-3p	6088.82	23173.8	28165.5	5863.98	16491.1	12158.8	-1.66391	-0.734578	0.404364	0.70327
hsa-miR-4466	8.54284	5.73503	7.71469	12.7818	6.6111	13.4833	1.49285	0.578072	0.40436	0.70327
hsa-miR-6895-5p	4.2287	6.69087	8.15807	2.89556	5.08546	4.11149	-1.58046	-0.660342	0.40511	0.703983
hsa-miR-12123	6.10813	10.4407	2.57156	4.94313	3.84235	3.14408	-1.59881	-0.677	0.406036	0.705008
hsa-miR-148a-5p	2.81914	13.4553	3.90168	5.17064	2.37321	4.71612	-1.63822	-0.71213	0.406839	0.705232
hsa-miR-376a-2-5p	2.30657	1.02937	0.354698	0.641159	1.0736	0.181389	-1.98564	-0.989605	0.406605	0.705232
hsa-miR-4720-5p	25.1587	5.44093	3.72433	11.3547	1.35612	8.22297	-1.6406	-0.714225	0.407537	0.705275
hsa-miR-4446-5p	15.3771	3.30867	8.60144	8.33506	4.68992	4.95797	-1.51757	-0.601765	0.407273	0.705275
hsa-miR-15a-3p	7.38955	14.117	6.6506	9.53465	7.6847	26.6642	1.55538	0.63727	0.408274	0.705967
hsa-miR-1297	10160.1	10873.9	14796.8	715.264	10618.7	9920.47	-1.68581	-0.753438	0.408663	0.706056
hsa-miR-1278	0.384428	0.514683	13.3899	0.289556	4.01186	2.90223	-1.98386	-0.988309	0.409904	0.707076
hsa-miR-4663	4.18599	8.60255	3.99036	4.05378	3.16429	3.20454	-1.59115	-0.670066	0.409929	0.707076
hsa-miR-374b-3p	5.80913	4.70567	14.72	15.181	8.98431	14.1484	1.52733	0.611014	0.410521	0.707515
hsa-miR-4433b-3p	7.47498	2.27931	1.68482	8.72803	8.02373	2.11621	1.6361	0.710263	0.412332	0.710052
hsa-miR-6516-3p	10.8494	12.3524	7.09397	0.951397	12.7137	4.59519	-1.66584	-0.736247	0.41472	0.713577
hsa-miR-6771-3p	9.78155	17.0581	17.7349	12.0579	5.08546	11.3066	-1.55716	-0.638916	0.416058	0.715098
hsa-miR-508-3p	8.71369	2.35283	2.48289	12.6577	4.52041	4.05102	1.55916	0.640769	0.416287	0.715098
hsa-miR-224-3p	1.83671	2.49989	6.6506	2.08894	1.01709	3.50686	-1.64962	-0.72213	0.41792	0.716741
hsa-miR-3187-3p	16.6158	7.64671	34.3171	29.8656	26.1054	39.301	1.62796	0.703064	0.417928	0.716741
hsa-miR-601	59.33	131.685	183.379	54.2917	94.5896	86.704	-1.58905	-0.668167	0.418682	0.717447
hsa-miR-6852-5p	4.78399	4.04393	7.89204	4.36402	5.25498	0.483704	-1.64668	-0.719564	0.419557	0.717551
hsa-miR-4722-5p	14.9927	2.64694	2.21687	5.04654	4.57691	2.90223	-1.59252	-0.671308	0.420121	0.717551
hsa-miR-6880-5p	21.7842	4.85272	5.14313	26.2048	11.7531	12.274	1.57552	0.655826	0.420456	0.717551
hsa-miR-4474-5p	0.469856	0	1.24144	1.71665	0.11301	1.69297	2.06543	1.04644	0.420203	0.717551
hsa-miR-4709-3p	13.0278	6.24972	3.81301	7.54913	1.92117	5.01843	-1.59307	-0.671808	0.419724	0.717551
hsa-miR-10396a-3p	10.2941	4.63214	8.33541	10.8583	13.5047	10.7624	1.49597	0.581077	0.421505	0.718721
hsa-miR-544a	1.70857	0.0735261	1.33012	0.661841	3.22079	2.35806	1.96192	0.972264	0.421828	0.718721
hsa-miR-624-3p	10.166	8.67608	9.75421	20.0414	9.9449	14.0274	1.54675	0.629238	0.422992	0.71912
hsa-miR-17-3p	7.77398	17.1316	3.99036	4.57084	5.70702	7.79973	-1.60405	-0.681723	0.423093	0.71912
hsa-miR-198	0.854284	4.33804	1.77349	1.57187	1.24311	1.02787	-1.7759	-0.828551	0.423046	0.71912
hsa-miR-4642	12.8143	3.3822	2.57156	9.10032	12.7137	6.77186	1.50975	0.594307	0.424038	0.720142
hsa-miR-146b-3p	114.816	260.724	229.845	104.736	85.5487	184.412	-1.61559	-0.692065	0.425	0.721192
hsa-miR-4301	2.43471	0.147052	3.54698	2.79214	1.97768	5.5626	1.68018	0.748618	0.426328	0.721693
hsa-miR-342-5p	28.4049	42.6451	33.6964	11.2306	34.2421	21.5248	-1.56651	-0.64755	0.426674	0.721693
hsa-miR-3177-5p	1.15328	0.147052	0.0886746	0.392968	0.22602	0	-2.20546	-1.14108	0.426642	0.721693
hsa-miR-628-5p	8.50012	3.23515	1.15277	3.72286	1.41263	2.72084	-1.6466	-0.719491	0.426401	0.721693
hsa-miR-185-5p	79.3629	107.716	69.6983	6.28749	55.262	92.5085	-1.66758	-0.73776	0.427332	0.721971
hsa-miR-515-5p	20.0757	11.2495	7.44867	23.2472	16.2735	20.376	1.53558	0.618782	0.427528	0.721971
hsa-miR-8070	30.2416	4.7792	9.84288	27.0734	36.7283	8.16251	1.60073	0.67873	0.427948	0.722097
hsa-miR-4474-3p	11.4047	6.02914	8.06939	13.3402	13.9568	11.7298	1.51149	0.595973	0.428568	0.722561
hsa-miR-651-3p	4.95485	8.52903	3.19229	1.36505	6.55459	1.99528	-1.69427	-0.760664	0.430421	0.72452
hsa-miR-3123	2.26385	3.01457	2.30554	1.303	0.960587	2.2976	-1.69987	-0.765426	0.430317	0.72452
hsa-miR-375-5p	4.27142	8.7496	5.85252	3.28852	2.65574	6.22769	-1.55452	-0.636472	0.43222	0.724873
hsa-miR-1282	3.67342	1.91168	7.35999	1.75802	4.23788	2.05574	-1.61032	-0.687344	0.432362	0.724873
hsa-miR-1199-5p	5.63827	5.80856	10.3749	5.46019	1.58214	6.65094	-1.58554	-0.664976	0.431422	0.724873
hsa-miR-302b-5p	0.170857	0.0735261	5.32048	0.0413651	1.24311	1.20926	-2.23362	-1.15939	0.431253	0.724873
hsa-miR-4695-3p	148.56	16.3963	4.96578	66.5978	16.4995	16.5064	-1.70598	-0.770599	0.431976	0.724873
hsa-miR-4643	13.2414	10.6613	12.4144	15.6774	5.02896	2.96269	-1.52488	-0.608697	0.433512	0.72506
hsa-miR-2115-3p	1.11057	2.94104	4.78843	6.53568	4.12487	2.90223	1.56471	0.645892	0.4335	0.72506
hsa-miR-5587-5p	4.01513	5.58798	3.81301	2.83351	4.29439	1.20926	-1.60402	-0.681692	0.432826	0.72506
hsa-miR-153-5p	1.96485	2.27931	1.50747	1.03413	1.92117	0	-1.94186	-0.957443	0.434134	0.72552
hsa-miR-4699-3p	0	1.10289	2.03952	1.303	2.76875	1.87435	1.90504	0.929819	0.434651	0.725804
hsa-miR-6854-5p	14.95	32.8662	24.5629	8.43848	21.7545	17.8971	-1.50757	-0.59222	0.435462	0.726001
hsa-miR-6822-3p	11.4901	2.86752	3.28096	4.92245	2.2037	3.86963	-1.61024	-0.687273	0.435161	0.726001
hsa-miR-4302	2.73371	0.36763	3.72433	2.37849	1.1301	0.423241	-1.70878	-0.772963	0.43641	0.727002
hsa-miR-223-5p	1.58042	1.83815	4.07903	9.57602	1.35612	1.26972	1.64495	0.718042	0.43902	0.730457
hsa-miR-22-5p	61.8501	89.9959	64.9985	20.4964	45.3736	71.165	-1.58417	-0.663729	0.439181	0.730457
hsa-miR-5700	2.00757	5.22035	0.443373	2.48191	0.508546	1.45111	-1.71229	-0.775931	0.439973	0.731194
hsa-miR-497-3p	2.86185	0	1.86217	2.97829	2.59924	2.53945	1.70156	0.766856	0.440765	0.731927
hsa-miR-4666b	33.4879	7.57319	12.2371	36.2358	18.1946	29.3246	1.56763	0.648589	0.441114	0.731927
hsa-miR-4638-5p	3.16085	1.47052	4.52241	5.50156	3.84235	4.95797	1.5768	0.657001	0.441799	0.732484
hsa-miR-6878-3p	18.3244	7.13203	6.47325	13.8573	12.8832	21.8272	1.50947	0.594045	0.443185	0.7342
hsa-miR-10399-5p	2.17842	2.49989	5.85252	1.57187	3.61633	1.33019	-1.60983	-0.686908	0.44461	0.734317
hsa-miR-520g-5p	12.1735	4.26451	3.10361	6.82524	3.84235	1.75343	-1.5721	-0.652695	0.444108	0.734317
hsa-miR-1914-3p	3.9297	4.41157	4.34506	5.99794	0.621556	1.1488	-1.60893	-0.686103	0.445009	0.734317
hsa-miR-223-3p	0.597999	2.79399	9.22216	0.330921	3.16429	3.44639	-1.81964	-0.863653	0.444897	0.734317
hsa-miR-6839-3p	26.1411	7.57319	6.11855	13.2989	6.89362	6.40908	-1.49888	-0.583885	0.444445	0.734317
hsa-miR-3937	4.10056	0.294104	1.95084	2.15098	1.29962	0	-1.8308	-0.872472	0.446667	0.736473
hsa-miR-1291	14.3093	9.63192	5.5865	7.61118	21.4719	15.1762	1.48746	0.572856	0.447891	0.73733
hsa-miR-556-3p	1.196	0.220578	0.709397	0.97208	0.508546	2.66037	1.86754	0.901142	0.447551	0.73733
hsa-miR-621	0.811569	0.147052	0.266024	1.19959	1.1301	0.181389	1.94679	0.961098	0.449089	0.738722
hsa-miR-548az-5p	1.40957	0.36763	3.45831	0.144778	6.44158	3.14408	1.8519	0.889004	0.44988	0.739441
hsa-miR-5683	0.128143	0.220578	1.68482	0.103413	2.42972	1.69297	2.08383	1.05924	0.450396	0.739708
hsa-miR-4445-5p	11.7891	1.76463	1.15277	5.60497	2.88176	0.120926	-1.7076	-0.771972	0.451895	0.741589
hsa-miR-1294	0.384428	4.26451	1.41879	4.55016	1.80816	3.62778	1.65802	0.729463	0.453422	0.743512
hsa-miR-7110-3p	5.80913	4.19099	3.54698	5.212	3.2773	12.5763	1.54016	0.623081	0.457606	0.7492
hsa-miR-4473	0.982426	2.79399	0.0886746	3.88832	1.92117	0.665094	1.67459	0.743806	0.457574	0.7492
hsa-miR-519a-3p	1.70857	2.35283	3.10361	1.94416	2.09069	0	-1.76065	-0.816108	0.459524	0.750208
hsa-miR-6072	1.75128	1.61757	0.532048	1.11686	0.847577	4.95797	1.73161	0.792112	0.459655	0.750208
hsa-miR-3171	0.469856	0.220578	4.34506	1.28232	3.61633	3.86963	1.74965	0.807067	0.459618	0.750208
hsa-miR-10398-5p	3.28899	20.4403	1.24144	5.66702	2.42972	7.67881	-1.58235	-0.662069	0.459173	0.750208
hsa-miR-4283	2.47742	1.91168	2.21687	4.94313	1.1301	4.35334	1.58145	0.661247	0.461502	0.752637
hsa-miR-1255b-2-3p	2.52014	0	8.60144	5.72906	3.67283	9.31131	1.68293	0.750979	0.468077	0.753656
hsa-miR-28-5p	70.7774	176.904	172.561	11.4581	114.931	135.377	-1.60569	-0.683197	0.463858	0.753656
hsa-miR-556-5p	2.94728	0	1.50747	0.144778	2.37321	5.98584	1.88689	0.916014	0.463577	0.753656
hsa-miR-6786-5p	0.896998	0.220578	3.99036	4.42606	4.4074	0.060463	1.74681	0.804721	0.468965	0.753656
hsa-miR-6506-3p	1.58042	5.95561	2.74891	2.606	1.46913	2.47898	-1.54875	-0.631108	0.467185	0.753656
hsa-miR-190b-3p	0.427142	2.05873	2.74891	0.0413651	2.48623	0.060463	-2.02895	-1.02073	0.467686	0.753656
hsa-miR-4708-5p	4.48499	0.220578	0.177349	4.96381	3.10778	0.483704	1.73051	0.7912	0.46862	0.753656
hsa-miR-6089	8.03027	21.1755	5.2318	6.45295	10.3404	7.31603	-1.43048	-0.516496	0.468047	0.753656
hsa-miR-6804-5p	2.00757	11.0289	2.74891	2.70941	4.52041	2.66037	-1.59534	-0.67386	0.466476	0.753656
hsa-miR-202-3p	4.74127	8.1614	9.57686	4.15719	4.4074	6.34862	-1.50205	-0.586928	0.4661	0.753656
hsa-miR-3135b	4.14328	1.6911	3.90168	4.67425	3.2773	7.1951	1.54089	0.623766	0.463368	0.753656
hsa-miR-5093	3.45985	2.13226	2.39421	4.52948	3.3338	4.4138	1.49569	0.580809	0.465906	0.753656
hsa-miR-1255a	4.2287	3.23515	7.71469	7.73527	9.09732	5.19982	1.46609	0.551971	0.465775	0.753656
hsa-miR-3153	9.9524	6.24972	6.56192	6.34954	3.84235	5.01843	-1.49363	-0.578822	0.468281	0.753656
hsa-miR-193a-5p	125.409	154.993	91.4235	59.9173	119.226	69.7139	-1.49524	-0.580374	0.468076	0.753656
hsa-miR-6756-5p	3.45985	2.57341	5.5865	3.66081	2.59924	0.846483	-1.60311	-0.680869	0.468518	0.753656
hsa-miR-346	49.3349	7.72024	16.4935	23.7849	11.2445	13.4228	-1.51865	-0.602785	0.46877	0.753656
hsa-miR-488-3p	6.3217	3.82336	6.11855	8.21097	5.70702	10.0369	1.46503	0.550926	0.466013	0.753656
hsa-miR-4754	3.58799	2.13226	1.77349	3.47467	4.35089	4.4138	1.5364	0.619555	0.46452	0.753656
hsa-miR-562	3.41713	6.10267	6.56192	11.0858	6.27207	5.01843	1.4148	0.500602	0.469825	0.754458
hsa-miR-6814-3p	0.683427	1.9852	0.0886746	2.89556	1.97768	0.060463	1.78364	0.834824	0.470903	0.754469
hsa-miR-4477a	2.09299	0.0735261	1.86217	1.98552	2.88176	1.99528	1.68211	0.750269	0.470912	0.754469
hsa-miR-513a-5p	98.926	188.741	64.0231	9.90694	161.661	44.8636	-1.62535	-0.700748	0.470707	0.754469
hsa-miR-4469	14.3093	5.22035	10.9957	8.74872	4.29439	8.58575	-1.41215	-0.497889	0.473607	0.758206
hsa-miR-523-3p	3.07542	0.0735261	0.266024	0.661841	2.59924	3.02315	1.78901	0.839162	0.473985	0.758231
hsa-miR-6833-5p	21.6561	4.26451	4.96578	6.84592	29.3827	9.4927	1.47384	0.559581	0.474915	0.759139
hsa-miR-4423-5p	50.1464	10.4407	19.3311	28.7074	17.4601	4.89751	-1.56454	-0.645742	0.47561	0.759669
hsa-miR-6802-3p	2.00757	0.147052	1.41879	0.765254	3.10778	2.41852	1.71965	0.782112	0.475984	0.759689
hsa-miR-6728-3p	8.71369	6.69087	7.44867	5.3361	4.29439	6.10677	-1.4753	-0.561004	0.477319	0.761239
hsa-miR-1972	7.43227	5.44093	2.30554	6.45295	2.42972	0.60463	-1.5907	-0.669665	0.479473	0.764092
hsa-miR-6760-5p	6.23627	2.42636	2.21687	2.83351	2.48623	1.81389	-1.5422	-0.624986	0.480009	0.764173
hsa-miR-4804-3p	1.53771	3.52925	2.66024	3.37125	0.452041	0.906946	-1.58895	-0.668073	0.480254	0.764173
hsa-miR-7108-3p	6.27898	4.55862	2.74891	8.2937	6.78061	5.13936	1.46971	0.555534	0.48347	0.766756
hsa-miR-2277-5p	3.84428	1.91168	6.2959	3.01965	6.21556	8.94853	1.50383	0.58864	0.482823	0.766756
hsa-miR-4492	19.3068	22.7931	26.5137	5.66702	18.9292	23.0364	-1.44424	-0.530307	0.483708	0.766756
hsa-miR-1469	16.1032	5.66151	7.89204	42.2958	3.3338	2.47898	1.62219	0.697947	0.482704	0.766756
hsa-miR-12133	11.2338	63.6001	94.0838	8.4178	34.8072	66.4489	-1.54041	-0.623318	0.483488	0.766756
hsa-miR-488-5p	1.87942	0	0.0886746	0.0206825	0	0.906946	-2.17638	-1.12193	0.48489	0.767468
hsa-miR-592	6.23627	4.33804	9.04481	6.39091	5.481	1.45111	-1.46064	-0.546598	0.484712	0.767468
hsa-miR-6782-3p	4.05785	0.220578	0.886746	6.37022	0.960587	1.08833	1.61752	0.693781	0.489349	0.773184
hsa-miR-1182	4.01513	3.97041	6.20722	2.7301	3.55982	2.90223	-1.53456	-0.617829	0.491086	0.773184
hsa-miR-3614-5p	4.05785	7.42614	6.02987	14.788	4.91595	5.0789	1.42835	0.514349	0.48961	0.773184
hsa-miR-544b	1.11057	11.9848	7.27132	4.75698	4.06837	4.29288	-1.54617	-0.628697	0.491048	0.773184
hsa-miR-12125	8.11569	7.27908	5.85252	6.8666	6.21556	1.02787	-1.50021	-0.585165	0.490813	0.773184
hsa-miR-6734-5p	2.34928	1.47052	2.30554	1.94416	4.12487	3.44639	1.50563	0.590365	0.489281	0.773184
hsa-miR-6079	6.36441	7.27908	8.15807	21.7374	5.19847	5.26029	1.48445	0.569931	0.490704	0.773184
hsa-miR-1183	2.56285	2.05873	6.56192	9.2451	3.72934	3.02315	1.44919	0.535251	0.496433	0.773192
hsa-miR-3154	18.7942	0.220578	8.15807	5.77043	4.80293	6.65094	-1.58014	-0.66005	0.493722	0.773192
hsa-miR-6502-3p	1.06785	2.35283	0.620722	2.00621	1.29962	3.20454	1.59585	0.674329	0.49663	0.773192
hsa-miR-451b	2.22114	10.8083	3.19229	1.28232	5.5375	3.56732	-1.56795	-0.648879	0.49452	0.773192
hsa-miR-1295b-3p	0.213571	5.0733	4.61108	13.878	0.169515	1.99528	1.6256	0.700969	0.492554	0.773192
hsa-miR-1203	7.47498	5.95561	5.40915	9.9483	9.54936	6.53001	1.37424	0.45863	0.495291	0.773192
hsa-miR-3193	1.36685	0.0735261	3.36964	3.32989	1.63865	2.66037	1.59476	0.673342	0.495174	0.773192
hsa-miR-6734-3p	9.14083	4.99977	11.9711	9.121	2.65574	6.46955	-1.42215	-0.508079	0.49416	0.773192
hsa-miR-3119	0.768855	4.92625	0.443373	4.11583	1.92117	3.68825	1.58632	0.665684	0.495708	0.773192
hsa-miR-6829-5p	1.794	6.61735	2.57156	3.24716	3.3338	0.241852	-1.59923	-0.677375	0.495918	0.773192
hsa-miR-3684	0.128143	0.147052	0.709397	0.951397	0.960587	0	1.99492	0.996328	0.492265	0.773192
hsa-miR-448	6.23627	6.83793	4.34506	10.7963	9.09732	4.17195	1.38437	0.469229	0.49316	0.773192
hsa-miR-5009-5p	64.6266	51.3947	58.3479	15.8221	56.3921	44.8031	-1.49246	-0.577695	0.495038	0.773192
hsa-let-7c-3p	3.50256	0.588209	2.03952	1.01344	4.85944	4.11149	1.59888	0.677065	0.493523	0.773192
hsa-miR-2113	3.11814	6.17619	1.86217	1.44778	3.50332	2.59991	-1.49764	-0.582692	0.496503	0.773192
hsa-miR-6516-5p	26.5255	10.0731	1.77349	11.0238	8.92781	5.5626	-1.50637	-0.591077	0.498035	0.774803
hsa-miR-6853-5p	1.83671	6.4703	3.10361	16.3185	1.69515	0.241852	1.60397	0.68165	0.498826	0.775458
hsa-miR-6828-3p	4.27142	0.36763	7.27132	3.70218	1.58214	2.17667	-1.58712	-0.666408	0.499364	0.775718
hsa-miR-298	1.45228	3.60278	2.66024	9.5967	1.0736	1.1488	1.54546	0.62804	0.500091	0.776271
hsa-miR-5192	5.1257	4.04393	13.4785	18.9245	4.85944	8.8276	1.44794	0.534002	0.500605	0.776494
hsa-miR-128-3p	87.6495	127.347	179.566	12.12	140.359	103.331	-1.54272	-0.625473	0.501457	0.776664
hsa-miR-665	12.4725	14.0435	25.0949	3.88832	41.4748	30.5943	1.47081	0.556616	0.501443	0.776664
hsa-miR-329-5p	0.768855	1.32347	8.95614	2.37849	3.2773	1.33019	-1.56956	-0.650362	0.504484	0.780037
hsa-miR-7852-3p	2.60557	2.13226	2.12819	5.95657	2.82526	1.33019	1.48702	0.572421	0.504149	0.780037
hsa-miR-4634	2.34928	0.147052	0.886746	2.89556	1.63865	0.906946	1.58076	0.660615	0.505092	0.780037
hsa-miR-877-5p	42.287	33.6749	5.85252	18.5936	24.3537	12.9391	-1.4656	-0.551493	0.505124	0.780037
hsa-miR-4259	25.2868	6.4703	3.81301	18.18	32.3774	3.86963	1.52622	0.609967	0.506578	0.780555
hsa-miR-5090	0.768855	0.220578	1.95084	0.682524	0.734567	0.120926	-1.84608	-0.884466	0.506463	0.780555
hsa-miR-10400-5p	22.1259	16.7639	14.0106	25.3154	25.1448	25.4549	1.41718	0.503028	0.506141	0.780555
hsa-miR-548b-3p	3.88699	4.63214	4.78843	3.22648	3.78584	1.6325	-1.50719	-0.591863	0.506996	0.780625
hsa-miR-4680-3p	2.77642	7.27908	0.177349	5.6877	5.70702	4.35334	1.53479	0.618038	0.507409	0.780686
hsa-miR-3191-3p	2.60557	0.735261	5.14313	2.39918	0.508546	2.47898	-1.56227	-0.643641	0.508383	0.781611
hsa-miR-1909-5p	3.28899	1.24994	4.69975	1.7787	3.84235	0	-1.64242	-0.715822	0.510628	0.784486
hsa-miR-5584-3p	2.69099	0.147052	1.15277	0.16546	3.78584	3.14408	1.74602	0.804072	0.513531	0.785489
hsa-miR-320a-5p	1.28143	0.220578	2.21687	2.93692	0.904082	1.93482	1.57027	0.651012	0.512494	0.785489
hsa-miR-4786-3p	9.48255	7.57319	5.67518	3.59876	6.83712	5.38121	-1.46979	-0.555608	0.511952	0.785489
hsa-miR-1-3p	15.2062	5.44093	14.986	14.7467	9.8884	26.9061	1.44347	0.529543	0.512864	0.785489
hsa-miR-564	14.352	5.29388	6.73927	5.04654	5.5375	8.40436	-1.40544	-0.491021	0.51328	0.785489
hsa-miR-8056	2.43471	9.8525	0.798072	7.36299	8.47577	3.99056	1.51455	0.598887	0.513522	0.785489
hsa-miR-6742-5p	2.00757	1.91168	3.10361	2.68873	5.98954	1.57204	1.46147	0.547423	0.514467	0.786346
hsa-miR-3945	0.811569	3.89688	0.709397	2.2544	0.791072	0.181389	-1.64399	-0.717198	0.515219	0.786921
hsa-miR-873-3p	0.555284	2.05873	3.36964	1.57187	2.42972	5.19982	1.54708	0.62955	0.516775	0.788722
hsa-miR-892c-5p	3.58799	0.0735261	2.21687	1.32368	1.46913	0.78602	-1.6497	-0.722205	0.517293	0.788938
hsa-miR-524-3p	7.94484	6.61735	5.32048	11.6236	0.565051	1.26972	-1.46953	-0.555357	0.519007	0.790976
hsa-miR-6508-3p	8.54284	12.0583	8.15807	12.9473	13.4482	14.0274	1.40623	0.491829	0.520248	0.791184
hsa-miR-4278	0.469856	0	0.354698	1.22027	0.22602	0.120926	1.8859	0.91525	0.520277	0.791184
hsa-miR-4691-5p	5.33927	6.54382	8.86746	4.50879	6.72411	3.32547	-1.41519	-0.500995	0.519657	0.791184
hsa-miR-6807-5p	12.9851	5.73503	8.06939	2.77146	12.3746	3.86963	-1.4175	-0.503353	0.521674	0.792733
hsa-miR-4495	2.22114	0	0.0886746	0.889349	0.0565051	3.50686	1.87961	0.91043	0.522126	0.792844
hsa-miR-4763-5p	8.28655	3.89688	9.48818	7.48708	2.82526	4.95797	-1.40826	-0.493917	0.523542	0.794418
hsa-miR-24-3p	24235.9	45316.6	23480.9	5140.48	29426.7	29331	-1.45597	-0.541976	0.523952	0.794465
hsa-miR-658	4.69856	1.83815	2.30554	1.84075	2.76875	1.57204	-1.46939	-0.555215	0.524382	0.794541
hsa-miR-6780b-3p	31.8648	5.73503	7.98072	23.6195	12.6006	29.6874	1.44161	0.527677	0.526532	0.797221
hsa-miR-617	0.256285	0.0735261	3.28096	2.41986	1.58214	1.81389	1.63089	0.705662	0.527533	0.798161
hsa-miR-615-3p	8.45741	8.82313	8.06939	5.5636	12.0356	16.9297	1.35281	0.435954	0.528403	0.798899
hsa-miR-1911-5p	0.0854284	3.89688	0.354698	2.04757	0.282526	0.120926	-1.73715	-0.796723	0.529089	0.799359
hsa-miR-3917	1.96485	0.36763	7.98072	2.2544	7.06314	6.7114	1.55568	0.637541	0.529668	0.799657
hsa-miR-4640-5p	2.64828	3.74983	7.62602	3.97105	3.50332	2.05574	-1.44226	-0.528333	0.533074	0.804219
hsa-miR-4783-5p	6.44984	2.05873	2.21687	3.88832	8.02373	3.99056	1.45575	0.541759	0.535562	0.80688
hsa-miR-4300	0.768855	0.220578	4.43373	4.34333	1.0736	2.96269	1.5609	0.642379	0.535608	0.80688
hsa-miR-4744	6.3217	3.89688	0.620722	6.53568	7.17615	2.05574	1.44416	0.53023	0.536583	0.807188
hsa-miR-7850-5p	2.39199	5.58798	4.96578	1.28232	2.65574	4.89751	-1.47584	-0.561539	0.536411	0.807188
hsa-miR-6894-5p	11.7891	13.5288	0.620722	7.15616	4.4639	6.22769	-1.4551	-0.541118	0.537663	0.808232
hsa-miR-520d-5p	1.75128	0.294104	3.28096	1.98552	3.67283	2.41852	1.51639	0.600638	0.538345	0.808676
hsa-miR-606	1.32414	0.0735261	0.177349	0.0827302	0.791072	0	-1.87657	-0.908099	0.540173	0.80968
hsa-miR-4652-5p	1.23871	0	2.39421	1.38573	0.11301	0.544167	-1.74589	-0.803962	0.539834	0.80968
hsa-miR-10399-3p	3.97242	11.0289	3.28096	6.94933	8.92781	10.0369	1.41533	0.501135	0.539407	0.80968
hsa-miR-6800-3p	1.58042	2.57341	4.34506	0.0620476	2.2602	2.7813	-1.67564	-0.744714	0.540888	0.810171
hsa-miR-548an	2.69099	0.514683	1.86217	0.0827302	1.58214	1.45111	-1.66113	-0.732167	0.542757	0.811807
hsa-miR-1288-5p	10.5931	11.0289	22.346	10.7963	5.36799	15.6599	-1.37865	-0.463252	0.543143	0.811807
hsa-miR-103b	9.26898	0.441157	0.532048	3.45398	1.86467	1.33019	-1.54628	-0.628799	0.543047	0.811807
hsa-miR-12131	3.54528	0.661735	6.91662	3.22648	0.11301	3.68825	-1.57829	-0.658361	0.543705	0.812068
hsa-miR-4445-3p	3.16085	3.60278	0.354698	0.868667	2.65574	1.08833	-1.56664	-0.64767	0.545464	0.812376
hsa-miR-137-5p	1.02514	0.36763	3.90168	4.44675	1.80816	1.57204	1.50191	0.586798	0.544884	0.812376
hsa-miR-4524a-3p	10.764	7.35261	10.8183	8.00414	7.23265	6.34862	-1.33036	-0.411821	0.544863	0.812376
hsa-miR-4481	0.0854284	0.441157	3.10361	2.29576	1.46913	1.93482	1.59468	0.673268	0.54528	0.812376
hsa-miR-122-3p	0.854284	0.147052	2.74891	2.56464	1.86467	1.26972	1.54406	0.626726	0.546914	0.81319
hsa-miR-95-5p	2.52014	5.88209	1.24144	4.17787	4.4639	5.0789	1.41628	0.502108	0.547572	0.81319
hsa-miR-4671-5p	1.02514	4.19099	6.56192	3.53671	7.7412	5.44167	1.42738	0.513369	0.547656	0.81319
hsa-miR-924	1.87942	0.808787	3.36964	3.86764	2.71225	2.23713	1.48358	0.569083	0.548048	0.81319
hsa-miR-7973	1.23871	3.52925	0.177349	0.186143	0.282526	2.41852	-1.73519	-0.795098	0.547573	0.81319
hsa-miR-210-3p	9.01269	0.220578	3.99036	3.66081	2.14719	3.14408	-1.48127	-0.566836	0.54834	0.81319
hsa-miR-619-3p	16.2314	26.3223	13.4785	7.63186	22.9411	10.0369	-1.38323	-0.468046	0.550723	0.813468
hsa-miR-3163	2.30657	0.0735261	0.709397	3.10238	1.92117	0	1.60946	0.686579	0.551247	0.813468
hsa-miR-3919	4.86942	7.0585	7.53734	5.72906	3.39031	4.23241	-1.41336	-0.49913	0.550759	0.813468
hsa-miR-1539	0.811569	1.61757	0.443373	2.50259	1.69515	0.241852	1.55494	0.636859	0.550899	0.813468
hsa-miR-193b-5p	1.75128	7.79377	7.98072	16.1117	2.71225	5.32075	1.38601	0.470937	0.549037	0.813468
hsa-miR-6806-5p	1.83671	1.83815	1.59614	1.63392	3.44681	2.96269	1.46485	0.550753	0.549636	0.813468
hsa-let-7f-2-3p	9.65341	18.5286	31.1248	2.23371	17.0645	23.0364	-1.40214	-0.487626	0.550623	0.813468
hsa-miR-3176	17.641	8.01434	9.57686	5.85316	6.89362	13.9065	-1.33284	-0.414509	0.55214	0.814213
hsa-miR-4686	2.60557	3.97041	1.95084	1.57187	5.70702	5.01843	1.4226	0.508533	0.552874	0.814557
hsa-miR-4736	1.06785	0.147052	0.975421	3.4333	0	0.181389	1.65063	0.723021	0.553152	0.814557
hsa-miR-4276	6.6207	2.49989	4.52241	3.01965	8.8713	7.67881	1.41558	0.501389	0.555647	0.817656
hsa-miR-6737-5p	118.532	264.473	263.896	68.1903	219.183	164.278	-1.43246	-0.518495	0.559896	0.82333
hsa-miR-4762-3p	8.15841	3.60278	1.59614	7.44572	5.31148	5.86492	1.37741	0.461954	0.561079	0.82449
hsa-miR-548ae-3p	1.06785	0.588209	1.0641	0.227508	2.09069	2.23713	1.63017	0.70502	0.562096	0.825405
hsa-miR-670-3p	1.36685	0.955839	4.69975	0.517064	1.69515	2.23713	-1.58649	-0.665837	0.563771	0.827286
hsa-miR-4506	2.98999	2.64694	4.69975	5.66702	1.24311	0.060463	-1.46903	-0.554861	0.565651	0.829463
hsa-miR-6887-3p	21.5707	9.04371	18.7103	9.82421	14.1263	13.1809	-1.33501	-0.41685	0.566139	0.829597
hsa-miR-4668-3p	7.34684	0.36763	1.86217	3.0817	5.481	5.62306	1.46369	0.549608	0.566857	0.830069
hsa-miR-361-5p	64.413	162.493	285.089	21.2823	143.071	195.598	-1.42251	-0.508436	0.568671	0.831563
hsa-miR-1227-5p	1.66585	4.11746	6.82795	5.37746	2.82526	0.483704	-1.43452	-0.520565	0.568522	0.831563
hsa-miR-6510-3p	0.939712	0.882313	4.96578	5.06722	1.58214	2.90223	1.42924	0.51525	0.56964	0.832398
hsa-miR-142-5p	2.09299	4.48509	5.2318	2.75078	5.36799	8.52529	1.41021	0.495906	0.57346	0.834109
hsa-miR-6515-3p	0.811569	5.22035	3.54698	0.910032	2.82526	2.72084	-1.48782	-0.573197	0.573549	0.834109
hsa-miR-5699-5p	2.05028	1.17642	0.0886746	2.54395	0.0565051	2.66037	1.56553	0.646653	0.5717	0.834109
hsa-miR-8086	1.96485	2.79399	0.620722	3.59876	0.508546	3.74871	1.45315	0.539185	0.573998	0.834109
hsa-miR-4470	1.15328	1.17642	0.354698	0.144778	1.41263	2.96269	1.63524	0.709501	0.573343	0.834109
hsa-miR-8053	2.00757	3.01457	0.620722	3.88832	3.39031	0.906946	1.44713	0.533194	0.57202	0.834109
hsa-miR-6721-5p	7.77398	0.294104	0.532048	3.37125	1.35612	0.967409	-1.51445	-0.598798	0.572637	0.834109
hsa-miR-1202	5.16842	0	9.04481	5.17064	9.32334	6.77186	1.49468	0.579837	0.573945	0.834109
hsa-miR-5195-5p	8.71369	10.1466	50.3672	2.70941	20.3983	77.3322	1.45074	0.536785	0.576899	0.835703
hsa-miR-16-1-3p	1.92214	3.60278	0.266024	1.28232	4.4074	3.02315	1.48541	0.570859	0.578599	0.835703
hsa-miR-4305	1.36685	1.76463	2.92626	2.93692	1.46913	3.86963	1.39379	0.479017	0.580102	0.835703
hsa-miR-7113-3p	4.44227	11.176	5.14313	1.73733	7.96722	5.13936	-1.40587	-0.491466	0.579886	0.835703
hsa-miR-1236-3p	10.9348	18.5286	11.6164	9.96899	11.9226	9.55316	-1.30446	-0.383453	0.578315	0.835703
hsa-miR-4766-5p	1.02514	4.70567	4.43373	2.39918	3.67283	0.967409	-1.43081	-0.516832	0.579464	0.835703
hsa-miR-324-5p	22.4677	19.9256	29.706	4.69494	19.2682	29.6874	-1.34644	-0.429153	0.578228	0.835703
hsa-miR-196a-3p	2.30657	6.54382	5.2318	1.26164	3.84235	5.01843	-1.3989	-0.484292	0.580178	0.835703
hsa-miR-6781-5p	4.69856	0.514683	1.95084	1.73733	3.61633	5.13936	1.43778	0.523841	0.577172	0.835703
hsa-miR-6835-5p	0.982426	3.52925	3.01494	3.14375	1.46913	0.544167	-1.42243	-0.50836	0.579311	0.835703
hsa-miR-7848-3p	1.23871	3.82336	0.532048	1.96484	3.78584	2.41852	1.44999	0.536043	0.577903	0.835703
hsa-miR-384	2.98999	0.0735261	6.6506	3.78491	5.82003	4.65565	1.46783	0.553689	0.580283	0.835703
hsa-miR-552-5p	1.40957	0	0.975421	2.83351	0.904082	0.060463	1.58492	0.664414	0.576377	0.835703
hsa-miR-3199	3.28899	2.20578	1.95084	5.66702	3.67283	0.967409	1.38599	0.470915	0.581065	0.836254
hsa-miR-4251	3.71613	3.89688	2.48289	4.81903	5.42449	3.99056	1.37362	0.457982	0.583164	0.838123
hsa-miR-219a-1-3p	68.0437	6.98498	7.27132	27.6319	26.2184	2.96269	-1.44928	-0.535332	0.583149	0.838123
hsa-miR-5704	2.94728	0.220578	4.34506	1.36505	0.847577	2.84176	-1.49034	-0.575643	0.583636	0.838226
hsa-miR-942-3p	7.90212	3.30867	2.83759	5.29473	4.12487	9.79501	1.34769	0.430491	0.584874	0.838853
hsa-miR-4704-3p	0.128143	0.220578	0.975421	0.227508	0.452041	0.060463	-1.69228	-0.758969	0.584776	0.838853
hsa-miR-5695	9.99512	12.1318	3.28096	7.03206	13.0527	13.2414	1.30304	0.381881	0.585709	0.839476
hsa-miR-4661-5p	1.83671	18.0139	8.15807	19.6898	4.74643	14.3297	1.38689	0.471854	0.587927	0.840209
hsa-miR-1284	3.03271	4.70567	3.45831	1.79938	8.8148	5.38121	1.41881	0.504682	0.586937	0.840209
hsa-miR-4720-3p	1.23871	1.24994	0.266024	1.40641	0.960587	2.05574	1.51989	0.603964	0.587856	0.840209
hsa-miR-188-3p	2.94728	6.32324	3.19229	3.32989	3.3338	2.17667	-1.39007	-0.475158	0.588089	0.840209
hsa-miR-1270	4.57042	0.808787	2.39421	4.23992	0.395536	0.665094	-1.45327	-0.539299	0.588227	0.840209
hsa-miR-551b-5p	0.854284	4.19099	6.82795	5.83248	3.10778	7.43695	1.38947	0.474536	0.589141	0.84078
hsa-miR-490-3p	10.9348	2.86752	1.0641	5.48087	2.2602	2.7813	-1.41728	-0.50312	0.58943	0.84078
hsa-miR-597-5p	1.196	2.42636	1.50747	1.05481	0.0565051	2.17667	-1.56135	-0.642793	0.591184	0.842709
hsa-miR-638	11.1911	9.63192	10.2863	13.2575	5.59401	4.71612	-1.3081	-0.387472	0.591997	0.842721
hsa-miR-6083	2.64828	2.86752	0.266024	0.682524	1.97768	1.20926	-1.52687	-0.610578	0.59186	0.842721
hsa-miR-5584-5p	2.39199	1.9852	0.443373	1.303	1.01709	1.02787	-1.46892	-0.55476	0.594682	0.845586
hsa-miR-3941	2.73371	7.20556	2.39421	7.4664	5.25498	3.74871	1.344	0.426534	0.594818	0.845586
hsa-miR-1266-3p	1.32414	8.1614	8.42409	3.78491	3.78584	5.44167	-1.37065	-0.454859	0.595909	0.846563
hsa-miR-581	2.00757	3.6763	6.56192	9.30714	2.54273	4.23241	1.33128	0.41281	0.596869	0.847352
hsa-miR-7156-3p	19.8621	1.17642	2.21687	5.35678	4.18138	7.13464	-1.40068	-0.486129	0.598177	0.848633
hsa-miR-4426	1.02514	2.35283	7.35999	4.69494	2.88176	7.13464	1.38057	0.465263	0.599137	0.849419
hsa-miR-12114	4.65585	3.6763	2.66024	9.67943	3.10778	1.87435	1.33924	0.421417	0.600116	0.850233
hsa-miR-4681	3.84428	0.514683	0.0886746	1.94416	1.18661	3.50686	1.46021	0.546172	0.602031	0.850241
hsa-miR-3938	5.46742	0	2.66024	4.71562	3.05128	3.9301	1.4314	0.517423	0.601787	0.850241
hsa-miR-3927-5p	0.982426	2.42636	2.30554	5.6877	0.847577	1.33019	1.40223	0.487723	0.600978	0.850241
hsa-miR-4799-5p	1.196	0.0735261	0.354698	1.71665	0.791072	0.120926	1.58184	0.661601	0.602152	0.850241
hsa-miR-3074-5p	8.11569	9.19076	9.84288	12.968	3.3338	3.86963	-1.33343	-0.415142	0.601815	0.850241
hsa-miR-4669	7.77398	0.294104	0.709397	3.57808	1.01709	1.39065	-1.47057	-0.55638	0.604188	0.851444
hsa-miR-4790-5p	1.66585	4.55862	9.22216	9.45192	0.904082	10.9438	1.38329	0.468102	0.603866	0.851444
hsa-miR-1273h-5p	4.95485	1.6911	4.25638	6.08067	2.14719	6.34862	1.33329	0.414993	0.604224	0.851444
hsa-miR-887-5p	2.00757	10.8819	3.81301	4.96381	5.5375	1.51158	-1.38392	-0.468765	0.605011	0.851979
hsa-miR-6776-5p	3.24628	4.26451	1.24144	0.806619	1.35612	4.05102	-1.4332	-0.519244	0.605659	0.852319
hsa-miR-6787-3p	0.811569	3.6763	3.63566	2.64737	3.84235	4.71612	1.39099	0.476112	0.606898	0.853
hsa-miR-29c-5p	249.109	303.516	223.46	137.477	203.757	233.387	-1.35147	-0.434528	0.608587	0.853
hsa-miR-615-5p	4.27142	12.7935	10.4636	9.65875	6.38508	5.13936	-1.28678	-0.363764	0.608304	0.853
hsa-miR-6789-5p	3.54528	2.20578	2.12819	5.99794	0.508546	4.4138	1.38422	0.469069	0.607323	0.853
hsa-miR-1304-5p	7.26141	6.61735	6.91662	17.5802	3.67283	6.0463	1.31905	0.399494	0.608154	0.853
hsa-miR-4529-3p	12.4725	0.36763	9.39951	17.1458	7.85421	5.26029	1.35984	0.443435	0.607986	0.853
hsa-miR-3976	1.45228	3.89688	0.177349	1.07549	0.791072	1.87435	-1.48711	-0.572513	0.611424	0.853547
hsa-miR-6716-3p	3.88699	5.80856	3.19229	0.599794	7.28916	1.45111	-1.38857	-0.473597	0.611071	0.853547
hsa-miR-4515	2.86185	3.23515	4.43373	6.22545	2.76875	4.65565	1.32828	0.409564	0.611278	0.853547
hsa-miR-10401-5p	4.48499	3.52925	0.798072	1.4271	0.678061	4.23241	-1.40841	-0.494063	0.611369	0.853547
hsa-miR-4279	4.27142	3.89688	3.28096	4.7363	5.65051	5.98584	1.33992	0.422143	0.611416	0.853547
hsa-miR-6515-5p	2.52014	6.61735	0.532048	2.04757	2.99477	1.93482	-1.39063	-0.475743	0.610043	0.853547
hsa-miR-100-3p	19.6058	13.6759	30.4154	9.32783	65.3764	12.3949	1.36665	0.450647	0.61275	0.85483
hsa-miR-4753-3p	1.32414	4.99977	4.07903	2.44054	5.31148	6.46955	1.36931	0.453452	0.613809	0.855736
hsa-miR-3188	2.17842	0	0.709397	2.48191	0	2.05574	1.55374	0.635744	0.614883	0.856662
hsa-miR-4263	2.09299	5.73503	1.0641	4.52948	4.74643	2.84176	1.36287	0.446647	0.615291	0.856662
hsa-miR-6762-5p	1.11057	0.147052	2.92626	0.186143	1.24311	1.26972	-1.56413	-0.645359	0.617129	0.85865
hsa-miR-4726-3p	0.896998	0	3.28096	1.22027	2.59924	2.41852	1.49457	0.579732	0.617973	0.859253
hsa-miR-6511a-3p	3.28899	2.13226	4.69975	5.64633	3.05128	4.59519	1.33574	0.417636	0.619337	0.8601
hsa-miR-103a-3p	246.546	255.797	223.105	40.4344	248.17	244.633	-1.36076	-0.444417	0.619403	0.8601
hsa-miR-5582-5p	1.32414	0.0735261	1.33012	0.0206825	1.58214	0.060463	-1.66285	-0.733655	0.621494	0.862431
hsa-miR-196a-1-3p	0.128143	0.147052	2.48289	1.46846	1.63865	1.02787	1.5274	0.611076	0.623153	0.863516
hsa-miR-181c-3p	8.88455	16.5434	3.72433	5.41883	9.60587	7.13464	-1.3205	-0.401079	0.623925	0.863516
hsa-miR-23a-5p	28.6612	10.0731	8.69011	10.362	14.8608	11.9112	-1.28399	-0.360634	0.623551	0.863516
hsa-miR-12119	2.94728	13.2347	14.1879	12.9266	2.65574	7.07418	-1.33345	-0.415161	0.62313	0.863516
hsa-miR-6857-3p	4.39956	1.17642	5.5865	4.59152	3.89885	6.40908	1.33183	0.413405	0.6253	0.864847
hsa-miR-205-5p	3.11814	3.23515	5.67518	1.59256	13.7872	1.45111	1.39652	0.481832	0.626282	0.865634
hsa-miR-922	4.8267	0.220578	1.95084	3.22648	1.52564	0.181389	-1.41573	-0.501547	0.627806	0.865645
hsa-miR-4442	3.50256	0.0735261	4.07903	1.67529	2.2037	1.51158	-1.4226	-0.508533	0.627944	0.865645
hsa-miR-133a-5p	1.11057	0.147052	2.48289	0.806619	1.24311	0.423241	-1.49797	-0.583012	0.62731	0.865645
hsa-miR-6794-3p	2.05028	2.27931	2.39421	2.04757	1.01709	1.45111	-1.3746	-0.459009	0.627659	0.865645
hsa-miR-3908	1.15328	1.61757	2.92626	1.05481	1.80816	1.02787	-1.44004	-0.526109	0.628475	0.865807
hsa-miR-3665	13.3695	3.3822	0.709397	5.95657	3.50332	3.38593	-1.36428	-0.448144	0.630816	0.866801
hsa-miR-874-5p	1.28143	4.19099	0.0886746	4.7363	1.46913	1.69297	1.4215	0.507416	0.63064	0.866801
hsa-miR-3170	4.65585	8.30845	3.90168	14.0021	2.2037	5.98584	1.32114	0.401787	0.630852	0.866801
hsa-miR-550b-2-5p	20.033	1.91168	4.52241	8.4178	10.4534	16.5669	1.33205	0.413646	0.630719	0.866801
hsa-miR-4536-3p	0.854284	2.35283	3.10361	3.74354	2.54273	1.99528	1.35744	0.440889	0.632033	0.867333
hsa-miR-4652-3p	7.34684	1.32347	7.71469	1.28232	4.01186	6.65094	-1.38046	-0.465149	0.632068	0.867333
hsa-miR-12117	4.48499	3.74983	4.07903	7.71459	6.89362	1.6325	1.32319	0.404023	0.633083	0.867588
hsa-miR-218-1-3p	59.031	29.8516	46.1108	36.0083	71.931	72.072	1.33095	0.412451	0.63282	0.867588
hsa-miR-4513	1.794	0.147052	0.532048	1.40641	0.282526	2.11621	1.49086	0.576145	0.633595	0.867722
hsa-miR-1913	36.2216	54.6299	40.347	8.74872	53.3973	114.275	1.34401	0.426542	0.634025	0.867744
hsa-miR-767-3p	0.51257	5.3674	1.59614	2.44054	1.92117	0.967409	-1.38732	-0.472298	0.634685	0.86808
hsa-miR-6081	3.54528	16.4698	4.07903	6.90797	4.4639	7.1951	-1.29518	-0.373148	0.635779	0.868903
hsa-miR-4689	3.9297	2.72047	0.798072	4.8604	1.97768	3.20454	1.33397	0.415727	0.636116	0.868903
hsa-miR-3657	9.48255	3.01457	3.90168	6.80456	1.46913	4.05102	-1.32986	-0.411273	0.636704	0.869138
hsa-miR-3174	3.58799	0.514683	4.78843	3.59876	5.36799	2.96269	1.33944	0.421631	0.638148	0.86941
hsa-miR-3168	2.73371	0	0.620722	0.0620476	1.97768	0.060463	-1.621	-0.696887	0.637491	0.86941
hsa-miR-3674	22.7667	6.10267	3.81301	7.32162	10.2274	7.79973	-1.29625	-0.374342	0.637797	0.86941
hsa-miR-6812-3p	0.811569	0.220578	7.98072	9.76216	1.1301	1.75343	1.41114	0.496857	0.639155	0.86965
hsa-miR-4654	19.9048	3.3822	3.99036	3.45398	7.06314	10.581	-1.30141	-0.380077	0.639005	0.86965
hsa-miR-5088-3p	3.16085	0.0735261	3.54698	3.14375	2.65574	3.62778	1.38519	0.47008	0.639608	0.8697
hsa-miR-4761-3p	1.15328	0.147052	0.177349	0.206825	0.734567	0.060463	-1.56641	-0.647462	0.640328	0.870114
hsa-miR-6732-5p	0.128143	0.0735261	0.886746	1.32368	0.169515	0.120926	1.56598	0.647067	0.642455	0.871907
hsa-miR-4457	0.170857	4.26451	1.77349	1.90279	0.339031	2.05574	-1.43382	-0.519862	0.642609	0.871907
hsa-miR-513c-5p	0.982426	1.32347	1.68482	1.7787	1.0736	2.47898	1.37438	0.458777	0.642896	0.871907
hsa-miR-3663-5p	7.2187	12.573	10.5523	9.05895	22.4325	7.49742	1.28484	0.361587	0.64379	0.872554
hsa-miR-449c-3p	4.31413	0.147052	2.83759	2.75078	0.11301	2.2976	-1.41392	-0.499705	0.644895	0.873486
hsa-miR-4789-3p	1.96485	1.24994	0.266024	1.09617	2.42972	1.57204	1.39292	0.47811	0.647499	0.874729
hsa-miR-1911-3p	1.87942	2.49989	1.15277	2.75078	0.11301	4.71612	1.36374	0.447571	0.647901	0.874729
hsa-miR-506-5p	1.11057	0.147052	3.45831	2.58532	2.93827	0.967409	1.38785	0.47285	0.646678	0.874729
hsa-miR-6748-3p	4.18599	3.3822	1.15277	1.34437	0.960587	4.23241	-1.35713	-0.44056	0.647109	0.874729
hsa-miR-6075	2.73371	6.83793	0.532048	6.08067	0.904082	0.241852	-1.38919	-0.474249	0.647305	0.874729
hsa-miR-4452	7.60312	3.89688	5.85252	14.6226	7.28916	0.725557	1.30593	0.38508	0.648674	0.875208
hsa-miR-4740-5p	6.9197	0.514683	3.45831	2.81283	1.29962	3.99056	-1.3525	-0.435626	0.649421	0.875652
hsa-miR-548u	4.27142	3.23515	8.15807	2.21303	8.8148	9.37177	1.29882	0.377203	0.651759	0.876208
hsa-miR-1976	8.24384	0.294104	5.14313	2.606	1.52564	6.0463	-1.35016	-0.433132	0.651201	0.876208
hsa-miR-6770-5p	15.2917	4.41157	5.14313	6.47364	5.65051	7.49742	-1.27676	-0.352487	0.651926	0.876208
hsa-miR-7106-5p	2.56285	8.01434	4.69975	4.44675	6.6676	8.52529	1.28671	0.36369	0.650603	0.876208
hsa-miR-29b-2-5p	24.7742	9.92602	11.705	9.2451	17.8556	9.73455	-1.26688	-0.34128	0.651212	0.876208
hsa-miR-8485	2.05028	0.514683	2.30554	3.32989	1.29962	1.75343	1.32287	0.403671	0.657361	0.877344
hsa-miR-4704-5p	0.597999	0.955839	0	0.144778	1.18661	1.1488	1.52963	0.613183	0.657321	0.877344
hsa-miR-4666a-3p	10.5504	18.8962	27.3118	2.50259	36.8413	35.1895	1.31255	0.39237	0.657236	0.877344
hsa-miR-3617-3p	2.09299	0.588209	4.43373	0.97208	1.0736	7.79973	1.37873	0.463342	0.657242	0.877344
hsa-miR-5586-5p	46.5585	29.9986	21.5479	36.8563	18.1946	20.497	-1.29809	-0.376393	0.657379	0.877344
hsa-miR-758-5p	3.16085	4.92625	0.620722	3.66081	1.92117	0.78602	-1.35964	-0.443221	0.655658	0.877344
hsa-miR-1247-3p	1.23871	2.49989	0.177349	0.186143	2.31671	0.120926	-1.51132	-0.595813	0.656978	0.877344
hsa-miR-4287	15.3344	21.4696	16.4935	9.65875	14.0698	19.1063	-1.25071	-0.322748	0.656872	0.877344
hsa-miR-3185	5.04027	8.01434	7.27132	9.51397	6.38508	8.70668	1.23468	0.304135	0.655935	0.877344
hsa-miR-591	1.83671	6.17619	5.76385	3.37125	3.22079	3.80917	-1.3099	-0.389454	0.654802	0.877344
hsa-miR-6811-3p	5.7237	6.32324	1.41879	4.98449	4.4639	8.22297	1.29902	0.37742	0.653604	0.877344
hsa-miR-1264	10.0378	33.1603	1.68482	24.0331	2.82526	6.46955	-1.34498	-0.427585	0.658993	0.87795
hsa-miR-3622a-3p	4.01513	3.82336	0.266024	0.827302	4.68992	5.62306	1.35929	0.442856	0.659084	0.87795
hsa-miR-3194-3p	2.64828	7.57319	8.51276	4.96381	4.63342	4.83704	-1.28362	-0.360221	0.659091	0.87795
hsa-miR-4797-5p	3.16085	0	1.95084	1.75802	1.58214	0.241852	-1.42751	-0.513499	0.661179	0.879612
hsa-miR-6769a-3p	1.495	7.64671	0.886746	5.17064	1.0736	1.1488	-1.34455	-0.427127	0.660927	0.879612
hsa-miR-3131	5.4247	0.588209	1.68482	3.45398	2.48623	4.47427	1.33111	0.412632	0.661725	0.879779
hsa-miR-4769-3p	2.39199	0.36763	2.57156	3.45398	1.35612	2.17667	1.31411	0.39409	0.663436	0.881408
hsa-miR-3157-3p	7.13327	1.83815	2.83759	4.46743	4.74643	6.28816	1.28904	0.366292	0.663792	0.881408
hsa-miR-876-3p	6.27898	5.58798	6.73927	5.77043	5.65051	3.08362	-1.26139	-0.33502	0.664261	0.881471
hsa-miR-6507-5p	0.128143	3.52925	3.28096	4.42606	2.09069	2.84176	1.36009	0.443705	0.66592	0.881729
hsa-miR-4797-3p	8.24384	0.220578	1.15277	1.4271	4.4074	1.26972	-1.3661	-0.450058	0.665864	0.881729
hsa-miR-4751	7.30413	5.95561	2.21687	6.94933	12.2616	0.846483	1.29187	0.369462	0.666615	0.881729
hsa-miR-203b-3p	1.62314	4.92625	8.33541	5.06722	5.02896	1.20926	-1.30475	-0.383768	0.666981	0.881729
hsa-miR-3678-3p	3.28899	3.23515	3.28096	2.50259	1.18661	3.9301	-1.29253	-0.370194	0.666393	0.881729
hsa-miR-7152-5p	7.5177	3.01457	4.07903	8.37643	2.31671	0.120926	-1.34653	-0.429243	0.666176	0.881729
hsa-miR-4658	5.04027	10.0731	4.25638	12.12	4.63342	7.31603	1.24915	0.320952	0.66809	0.882292
hsa-miR-7108-5p	28.6612	39.0424	87.4332	65.4809	73.7957	57.6817	1.27115	0.346135	0.66825	0.882292
hsa-miR-4690-5p	4.31413	5.14683	2.83759	3.4333	3.16429	3.265	-1.25938	-0.332715	0.670105	0.884184
hsa-miR-1298-3p	1.196	3.82336	1.24144	6.39091	0.847577	0.906946	1.31433	0.39433	0.671749	0.884715
hsa-miR-10393-5p	10.0378	9.26429	9.31084	13.0507	9.66237	12.8182	1.24752	0.31906	0.671747	0.884715
hsa-miR-6501-5p	59.7999	7.20556	13.9219	29.6794	24.0147	8.28344	-1.30657	-0.385788	0.671775	0.884715
hsa-miR-4737	1.83671	3.52925	2.83759	2.19235	4.80293	3.50686	1.27591	0.351529	0.673445	0.886295
hsa-miR-3977	8.37198	7.27908	3.81301	17.2699	4.68992	2.7813	1.2735	0.348804	0.673822	0.886295
hsa-miR-3671	5.55284	5.0733	3.99036	0.992762	5.93304	4.35334	-1.31197	-0.391739	0.677041	0.889971
hsa-miR-933	1.70857	0.0735261	0.354698	1.26164	0.0565051	0.120926	-1.46716	-0.553028	0.677939	0.890593
hsa-miR-3121-3p	3.16085	3.30867	4.25638	6.08067	2.71225	4.29288	1.2506	0.322619	0.686077	0.890903
hsa-miR-3200-3p	4.91213	8.1614	1.59614	7.23889	1.97768	2.2976	-1.26689	-0.341295	0.683076	0.890903
hsa-miR-4637	0.768855	2.05873	2.12819	1.09617	2.14719	3.32547	1.32676	0.407906	0.684853	0.890903
hsa-miR-6808-5p	9.9524	11.6906	9.66553	1.59256	6.04605	17.111	-1.2697	-0.344485	0.682312	0.890903
hsa-miR-1296-3p	0.597999	3.0881	3.90168	2.44054	0.11301	3.02315	-1.35173	-0.434809	0.681976	0.890903
hsa-miR-3973	0.469856	0.0735261	2.57156	0.16546	1.86467	0	-1.53536	-0.618573	0.6851	0.890903
hsa-miR-181d-3p	1.06785	4.7792	2.83759	2.56464	5.25498	3.32547	1.28848	0.365675	0.687466	0.890903
hsa-miR-4999-3p	0.341713	2.72047	1.59614	1.13754	2.71225	2.41852	1.35037	0.43335	0.680865	0.890903
hsa-miR-383-3p	1.92214	0.294104	2.57156	2.27508	0.22602	0.967409	-1.35855	-0.442066	0.686292	0.890903
hsa-miR-10394-5p	1.36685	5.58798	0.886746	5.06722	4.23788	0.906946	1.30641	0.385611	0.681218	0.890903
hsa-miR-642a-3p	1.66585	0.147052	0.532048	0.0620476	1.18661	2.2976	1.46186	0.547804	0.684714	0.890903
hsa-miR-4462	19.9902	0.147052	4.16771	5.00518	5.14197	8.16251	-1.33112	-0.412636	0.683537	0.890903
hsa-miR-3150b-3p	0.0854284	4.33804	2.03952	1.71665	2.76875	4.23241	1.34989	0.432842	0.681194	0.890903
hsa-miR-383-5p	24.2189	22.7196	39.5489	28.4178	27.744	52.2401	1.2537	0.326192	0.687535	0.890903
hsa-miR-4771	0.298999	1.76463	0.266024	0.289556	2.99477	0.181389	1.47185	0.557629	0.684915	0.890903
hsa-miR-6820-5p	2.09299	2.57341	4.61108	1.34437	1.41263	4.47427	-1.28923	-0.366513	0.685728	0.890903
hsa-miR-626	1.23871	0.147052	2.30554	0.206825	2.65574	2.41852	1.41847	0.504333	0.681912	0.890903
hsa-miR-331-5p	3.07542	6.32324	0.798072	2.08894	5.42449	5.92538	1.30721	0.386496	0.681043	0.890903
hsa-miR-5571-3p	1.23871	1.9852	3.19229	2.89556	1.35612	3.80917	1.28071	0.356939	0.687311	0.890903
hsa-miR-4750-5p	1.794	3.97041	3.28096	4.23992	3.22079	3.50686	1.25651	0.329426	0.687269	0.890903
hsa-miR-1224-5p	2.86185	0.147052	0.532048	1.94416	1.69515	1.26972	1.34873	0.431599	0.685572	0.890903
hsa-miR-133a-3p	21.3571	9.70544	17.4689	20.3103	8.58878	9.25085	-1.26835	-0.342957	0.679618	0.890903
hsa-miR-649	1.87942	7.0585	5.49783	4.40538	3.55982	3.44639	-1.24819	-0.319832	0.692068	0.891261
hsa-miR-889-5p	7.68855	12.2053	15.9614	4.94313	21.698	17.232	1.22241	0.28973	0.691607	0.891261
hsa-miR-4285	12.9424	0.0735261	0.532048	3.99173	3.10778	2.90223	-1.35961	-0.443193	0.688365	0.891261
hsa-miR-184	2.47742	3.52925	7.44867	6.20476	1.97768	2.23713	-1.26788	-0.342424	0.692065	0.891261
hsa-miR-6827-5p	2.56285	3.89688	5.49783	7.90073	2.88176	3.80917	1.24455	0.31563	0.691429	0.891261
hsa-miR-7704	15.4198	16.1022	9.75421	18.2006	9.71888	5.19982	-1.24172	-0.312337	0.691979	0.891261
hsa-miR-491-5p	9.99512	0.147052	7.09397	3.12306	1.35612	8.52529	-1.32882	-0.410145	0.690523	0.891261
hsa-miR-6780a-3p	7.2187	6.91145	20.0405	16.091	16.1605	9.91594	1.24023	0.31061	0.688732	0.891261
hsa-miR-10395-5p	8.84184	2.42636	3.10361	3.12306	7.00663	1.26972	-1.27009	-0.344932	0.690467	0.891261
hsa-miR-3679-3p	7.60312	3.60278	7.89204	12.7818	4.4639	6.53001	1.25075	0.32279	0.689397	0.891261
hsa-miR-8087	1.83671	2.86752	5.32048	2.48191	3.55982	1.75343	-1.26528	-0.339455	0.694639	0.891284
hsa-miR-4746-5p	8.24384	4.26451	17.1142	11.0858	7.28916	5.19982	-1.24903	-0.320809	0.694459	0.891284
hsa-miR-6761-5p	2.69099	4.70567	5.67518	8.12824	6.32857	1.81389	1.25784	0.330945	0.694058	0.891284
hsa-miR-548aj-5p	10.8494	0	0.532048	9.05895	0.678061	5.86492	1.36572	0.449658	0.693365	0.891284
hsa-miR-3652	3.07542	18.0139	14.3653	15.6981	10.3404	17.8971	1.24241	0.313139	0.694373	0.891284
hsa-miR-3691-5p	3.28899	6.17619	1.95084	6.74251	4.01186	3.62778	1.26628	0.340596	0.694043	0.891284
hsa-miR-7703	6.06541	0.147052	0.709397	3.0817	0.0565051	1.99528	-1.35262	-0.435758	0.696204	0.892744
hsa-miR-1226-5p	2.34928	4.55862	3.01494	1.4271	5.25498	1.08833	-1.28296	-0.359481	0.696824	0.892993
hsa-miR-3159	2.43471	6.7644	10.7296	8.85213	3.72934	3.20454	-1.24831	-0.319975	0.697441	0.893236
hsa-miR-6764-3p	16.7012	6.02914	12.0597	10.1138	11.9791	6.46955	-1.22111	-0.288194	0.698621	0.893654
hsa-miR-6874-5p	1.15328	2.64694	4.69975	1.13754	5.31148	4.47427	1.28601	0.362902	0.698565	0.893654
hsa-miR-4697-3p	16.2314	26.2488	21.7253	5.27405	29.3827	17.3529	-1.23659	-0.306367	0.701721	0.897071
hsa-miR-371a-3p	4.44227	2.64694	1.77349	7.03206	2.59924	1.39065	1.24516	0.316332	0.703349	0.898199
hsa-miR-3678-5p	0.298999	0	1.77349	0.537746	0.791072	0.060463	-1.46333	-0.54926	0.703612	0.898199
hsa-miR-4679	13.0278	6.10267	9.39951	8.10756	9.66237	6.28816	-1.19334	-0.255007	0.703889	0.898199
hsa-miR-10226	4.5277	2.20578	0.620722	6.26681	1.92117	1.20926	1.2728	0.348003	0.70484	0.898843
hsa-miR-6847-3p	1.06785	6.98498	3.99036	0.248191	2.59924	6.22769	-1.33156	-0.413114	0.705253	0.898843
hsa-miR-3688-3p	1.83671	3.16162	2.03952	2.50259	1.75166	4.59519	1.25214	0.324394	0.705755	0.898936
hsa-miR-124-3p	1.92214	2.86752	2.83759	2.75078	2.14719	0.967409	-1.24746	-0.318999	0.708344	0.899011
hsa-miR-6858-3p	5.29656	0.735261	4.07903	6.82524	1.63865	4.35334	1.26645	0.340795	0.708761	0.899011
hsa-miR-1233-3p	5.08299	2.49989	3.99036	2.39918	4.18138	2.90223	-1.25392	-0.326444	0.709678	0.899011
hsa-miR-1256	4.5277	4.41157	6.20722	4.44675	5.98954	8.28344	1.22732	0.295517	0.707568	0.899011
hsa-miR-4743-5p	2.81914	1.61757	14.3653	6.30818	4.91595	3.68825	-1.25359	-0.32607	0.707868	0.899011
hsa-miR-4266	9.31169	0.0735261	0.177349	1.03413	2.59924	3.50686	-1.34953	-0.432452	0.707345	0.899011
hsa-miR-183-3p	6.6207	5.29388	1.24144	7.09411	1.1301	2.11621	-1.26822	-0.342801	0.709352	0.899011
hsa-miR-6818-5p	8.75641	2.27931	2.57156	10.5067	3.95536	2.17667	1.2199	0.286765	0.708822	0.899011
hsa-miR-4776-3p	38.2292	3.74983	9.93156	14.6846	25.6533	25.6363	1.26748	0.341961	0.706609	0.899011
hsa-miR-3156-5p	3.71613	6.02914	5.49783	2.48191	7.45868	2.35806	-1.24321	-0.314072	0.713167	0.900223
hsa-miR-18a-5p	7.13327	34.7043	17.2029	5.85316	16.8385	25.6363	-1.22263	-0.289991	0.713441	0.900223
hsa-miR-125b-2-3p	2.60557	7.42614	22.7007	17.4767	4.35089	4.4138	-1.24162	-0.31222	0.71203	0.900223
hsa-miR-9902	3.20356	1.32347	1.68482	0.847984	0.169515	3.74871	-1.3212	-0.401846	0.713644	0.900223
hsa-miR-3134	8.11569	0.588209	9.13349	12.2234	4.74643	5.19982	1.2439	0.314871	0.71147	0.900223
hsa-miR-10393-3p	0.896998	1.32347	1.68482	2.58532	0.0565051	0.181389	-1.3475	-0.430289	0.7125	0.900223
hsa-miR-3143	3.75885	2.72047	2.30554	2.08894	3.10778	2.2976	-1.24664	-0.318049	0.711526	0.900223
hsa-miR-4438	1.96485	4.04393	4.52241	6.24613	0.395536	1.57204	-1.2659	-0.340165	0.716926	0.903275
hsa-miR-8055	2.13571	1.47052	2.74891	1.75802	0.791072	2.41852	-1.27232	-0.347462	0.716748	0.903275
hsa-miR-3133	1.36685	4.26451	0.266024	2.66805	1.35612	3.44639	1.26234	0.336096	0.72097	0.904103
hsa-miR-4476	7.56041	17.7198	9.39951	8.27302	10.623	10.0973	-1.19572	-0.25788	0.719207	0.904103
hsa-miR-5088-5p	3.24628	0.514683	2.92626	7.11479	0.0565051	1.51158	1.30049	0.379054	0.722713	0.904103
hsa-miR-6085	4.5277	7.94082	3.81301	1.26164	6.27207	12.9996	1.25504	0.327739	0.722764	0.904103
hsa-miR-4307	47.8826	170.948	61.5402	95.2431	53.4538	78.6624	-1.2327	-0.301816	0.722668	0.904103
hsa-miR-4778-5p	3.20356	2.13226	5.5865	5.10859	1.41263	2.17667	-1.23202	-0.301021	0.720346	0.904103
hsa-miR-4304	0.640713	0.0735261	1.41879	0.785937	0.678061	0	-1.42466	-0.51062	0.721096	0.904103
hsa-miR-600	1.196	0.294104	1.24144	0	2.54273	1.39065	1.42015	0.506045	0.719696	0.904103
hsa-miR-219b-5p	12.7715	10.9554	10.0202	24.4881	4.68992	12.4554	1.23609	0.30578	0.721475	0.904103
hsa-miR-663b	4.69856	5.66151	1.15277	5.27405	3.55982	0.181389	-1.27468	-0.35014	0.718925	0.904103
hsa-miR-4684-3p	24.8169	1.17642	6.11855	12.1613	6.95013	6.65094	-1.24852	-0.320222	0.720822	0.904103
hsa-miR-937-5p	2.98999	0.0735261	3.63566	5.99794	0.847577	1.69297	1.27784	0.353709	0.720194	0.904103
hsa-miR-302c-5p	1.70857	4.55862	0.177349	2.02689	5.5375	0.78602	1.28921	0.366487	0.723852	0.904923
hsa-miR-4717-5p	6.15084	0.294104	4.52241	6.65978	3.72934	3.38593	1.25339	0.325838	0.725414	0.905011
hsa-miR-6767-5p	0.768855	0.0735261	2.57156	1.26164	0.904082	0.302315	-1.35272	-0.435865	0.725651	0.905011
hsa-miR-1908-3p	7.64584	5.44093	4.16771	1.96484	9.43635	10.2183	1.24138	0.311943	0.725218	0.905011
hsa-miR-4531	15.847	4.04393	0.975421	13.4643	4.52041	7.79973	1.23123	0.300095	0.72531	0.905011
hsa-miR-548q	9.48255	9.70544	3.81301	7.28026	13.5612	6.7114	1.18895	0.249689	0.726609	0.905219
hsa-miR-548v	4.2287	12.3524	1.0641	2.29576	8.75829	3.02315	-1.25729	-0.330315	0.726683	0.905219
hsa-miR-4655-5p	6.70613	5.58798	4.07903	6.37022	2.76875	4.4138	-1.20131	-0.264603	0.72866	0.905988
hsa-miR-6529-5p	1.23871	2.86752	1.0641	0.889349	0.11301	2.90223	-1.33358	-0.415303	0.729717	0.905988
hsa-miR-4479	1.62314	2.64694	11.2617	8.6453	2.09069	8.16251	1.22345	0.29096	0.729157	0.905988
hsa-miR-7154-3p	5.85184	13.97	5.9412	7.38367	6.83712	7.13464	-1.20295	-0.266578	0.729896	0.905988
hsa-miR-1268a	24.2189	7.0585	5.14313	15.3878	7.17615	22.069	1.22079	0.28781	0.728913	0.905988
hsa-miR-27a-3p	13603.1	20402.4	30021.2	1448.27	22109.5	28014.6	-1.24149	-0.312077	0.728721	0.905988
hsa-miR-6505-3p	4.91213	0	7.53734	7.9421	1.41263	6.65094	1.28547	0.36229	0.730588	0.90631
hsa-miR-1229-3p	8.37198	7.94082	32.0115	14.3744	14.0698	11.3066	-1.21204	-0.277431	0.731986	0.906512
hsa-miR-4639-5p	14.2665	3.74983	0.886746	6.55637	2.2037	6.7114	-1.22684	-0.294944	0.731211	0.906512
hsa-miR-6809-3p	2.77642	3.89688	4.69975	2.29576	4.68992	2.23713	-1.23275	-0.301885	0.732049	0.906512
hsa-miR-143-5p	2.77642	0.36763	1.95084	0.806619	1.41263	1.81389	-1.29741	-0.37563	0.732578	0.90663
hsa-miR-376b-5p	2.22114	0.735261	2.57156	2.02689	3.50332	1.39065	1.24373	0.314678	0.733744	0.907536
hsa-miR-33a-3p	4.2287	7.13203	2.83759	5.54292	4.01186	2.05574	-1.21224	-0.277671	0.735366	0.908022
hsa-miR-3651	24.3898	5.3674	3.99036	6.90797	9.49286	11.488	-1.2166	-0.282857	0.735407	0.908022
hsa-miR-155-3p	0.51257	0.220578	0.0886746	0.124095	1.01709	0.120926	1.38808	0.473089	0.735437	0.908022
hsa-miR-9500	18.239	11.7642	7.80337	23.8263	13.2222	9.12992	1.22051	0.287488	0.736271	0.908515
hsa-miR-4733-5p	1.53771	3.23515	0.798072	2.31644	1.92117	0.060463	-1.28804	-0.365179	0.736995	0.908874
hsa-miR-3974	2.56285	5.22035	3.99036	7.25957	6.83712	0.362778	1.23181	0.300775	0.737965	0.909535
hsa-miR-6831-3p	0.128143	0.220578	2.83759	1.09617	0.0565051	1.1488	-1.36218	-0.445913	0.738975	0.910243
hsa-miR-5571-5p	48.0962	5.58798	16.7595	27.301	20.4549	9.61362	-1.2287	-0.297132	0.740757	0.910259
hsa-miR-545-5p	1.96485	0.0735261	1.68482	1.1789	0.508546	1.1488	-1.31684	-0.397084	0.741982	0.910259
hsa-miR-148a-3p	103.795	82.4227	53.4708	13.6712	97.3018	83.1972	-1.23529	-0.30485	0.739462	0.910259
hsa-miR-1250-5p	1.75128	1.9852	0.354698	1.86143	1.01709	0.302315	-1.27398	-0.349339	0.743449	0.910259
hsa-miR-4502	14.053	22.9401	20.7499	25.6257	23.1671	19.2877	1.18902	0.249771	0.743382	0.910259
hsa-miR-93-3p	6.10813	10.4407	5.9412	3.06102	5.02896	10.702	-1.20468	-0.268655	0.741351	0.910259
hsa-miR-4680-5p	2.60557	0.955839	2.12819	2.39918	0.565051	1.57204	-1.2399	-0.310222	0.743037	0.910259
hsa-miR-3934-3p	6.83427	5.58798	0.532048	7.818	7.11964	1.1488	1.23806	0.308079	0.741926	0.910259
hsa-miR-4455	3.11814	10.4407	22.7894	13.8987	17.6861	11.7298	1.1952	0.257257	0.742423	0.910259
hsa-miR-653-5p	4.78399	2.13226	3.36964	4.63289	4.57691	3.32547	1.20087	0.264083	0.743769	0.910259
hsa-miR-6885-3p	7.13327	4.26451	6.11855	7.818	6.15906	0.241852	-1.22953	-0.298106	0.740957	0.910259
hsa-miR-6782-5p	0.854284	3.45573	3.36964	2.27508	2.03418	5.0789	1.22959	0.298173	0.744526	0.910652
hsa-miR-6768-3p	5.29656	10.2201	6.20722	5.95657	11.8096	8.16251	1.19046	0.251522	0.745984	0.911887
hsa-miR-532-5p	203.448	416.158	543.93	79.3382	595.564	759.537	1.2328	0.301936	0.746406	0.911887
hsa-miR-3129-3p	4.01513	2.27931	1.95084	0.16546	3.61633	2.7813	-1.27341	-0.348692	0.7486	0.912437
hsa-miR-579-5p	10.2514	4.92625	8.86746	10.4654	6.10255	3.9301	-1.16671	-0.222449	0.747455	0.912437
hsa-miR-4508	4.69856	5.0733	2.92626	6.65978	4.57691	3.9301	1.20045	0.263579	0.748265	0.912437
hsa-miR-4708-3p	2.43471	7.94082	11.705	8.97622	9.04082	7.73927	1.17479	0.232399	0.748528	0.912437
hsa-miR-1288-3p	5.33927	3.52925	3.36964	5.50156	1.80816	7.43695	1.19782	0.260414	0.750935	0.913966
hsa-miR-4777-3p	2.13571	0.147052	0.354698	1.19959	0.791072	0	-1.33197	-0.413566	0.751163	0.913966
hsa-miR-4535	9.65341	5.95561	6.73927	9.53465	10.2274	6.28816	1.15739	0.21087	0.75048	0.913966
hsa-miR-943	6.23627	13.8964	10.7296	11.0652	4.4639	10.2787	-1.18865	-0.249323	0.752176	0.914667
hsa-miR-6512-5p	0.768855	0.0735261	0.266024	0.103413	0.0565051	1.45111	1.36603	0.449987	0.754114	0.915946
hsa-miR-4773	0.982426	1.9852	0.266024	0.889349	0.169515	1.45111	-1.29814	-0.376449	0.75454	0.915946
hsa-miR-3125	7.38955	8.60255	6.91662	10.6929	6.95013	8.70668	1.16707	0.222889	0.75425	0.915946
hsa-miR-8084	0.0427142	5.58798	4.16771	5.52224	0.791072	1.39065	-1.26342	-0.337339	0.758683	0.916195
hsa-miR-888-3p	0.128143	2.94104	0.354698	1.03413	3.39031	0.120926	1.32455	0.4055	0.758138	0.916195
hsa-miR-4728-3p	0.170857	2.86752	0.177349	0.16546	0.904082	1.33019	-1.35462	-0.437886	0.756706	0.916195
hsa-miR-3064-5p	7.43227	4.92625	14.454	7.71459	14.7478	8.58575	1.1595	0.213502	0.756564	0.916195
hsa-miR-4767	20.7164	5.3674	5.49783	9.32783	7.40217	10.0973	-1.18374	-0.243355	0.756987	0.916195
hsa-miR-549a-5p	2.64828	1.91168	4.43373	3.10238	5.02896	2.66037	1.20724	0.271707	0.756126	0.916195
hsa-miR-4284	10.1233	24.2636	12.1484	13.3196	8.70179	17.8366	-1.16643	-0.222103	0.75854	0.916195
hsa-miR-6888-3p	7.13327	2.35283	5.9412	5.48087	3.72934	9.19038	1.1846	0.244399	0.755385	0.916195
hsa-miR-4743-3p	8.20112	3.16162	6.56192	8.85213	3.55982	2.53945	-1.19152	-0.252809	0.757794	0.916195
hsa-miR-6080	2.22114	0	0.532048	2.52327	0.11301	0.967409	1.29526	0.373241	0.759396	0.916527
hsa-miR-510-3p	8.20112	2.49989	0.620722	5.60497	3.2773	4.83704	1.20016	0.26323	0.760182	0.916948
hsa-miR-4477b	4.14328	6.98498	0.354698	3.95037	3.84235	6.16723	1.20935	0.274229	0.762574	0.919303
hsa-miR-4757-3p	5.76641	1.91168	8.15807	5.212	6.55459	1.39065	-1.20044	-0.263568	0.764082	0.920591
hsa-miR-1277-5p	1.87942	2.64694	0.709397	2.606	1.46913	0.120926	-1.23685	-0.306675	0.765432	0.9216
hsa-miR-4787-3p	1.32414	0	0.354698	0.144778	1.01709	1.20926	1.34357	0.426071	0.765799	0.9216
hsa-miR-548ad-3p	1.53771	2.94104	0.798072	3.57808	2.65574	0.181389	1.21944	0.286219	0.768857	0.92244
hsa-miR-2114-5p	9.48255	1.47052	2.92626	7.3423	0.904082	3.265	-1.20611	-0.270364	0.771166	0.92244
hsa-miR-3922-5p	6.23627	5.14683	4.16771	5.19132	4.63342	3.44639	-1.17143	-0.228272	0.771343	0.92244
hsa-miR-4768-3p	1.58042	0.882313	3.63566	2.48191	2.31671	0.120926	-1.22661	-0.294682	0.769545	0.92244
hsa-miR-3140-5p	5.29656	0.220578	6.56192	4.90176	1.0736	3.9301	-1.21764	-0.284089	0.76959	0.92244
hsa-miR-130a-5p	4.2287	3.16162	9.75421	1.92348	6.04605	6.46955	-1.19065	-0.251752	0.771071	0.92244
hsa-miR-3137	15.3344	8.82313	16.2275	14.271	9.9449	10.581	-1.15541	-0.208407	0.769779	0.92244
hsa-miR-5580-5p	3.41713	1.83815	8.06939	7.07343	4.4074	3.9301	1.16915	0.225458	0.770795	0.92244
hsa-miR-1251-3p	14.0103	11.6906	20.7499	22.0476	13.1657	3.86963	-1.18446	-0.244231	0.770814	0.92244
hsa-miR-4533	2.64828	5.80856	3.36964	3.57808	4.18138	2.05574	-1.19053	-0.2516	0.770467	0.92244
hsa-miR-6869-5p	7.47498	6.91145	11.9711	11.3754	5.08546	5.80445	-1.16857	-0.224749	0.767129	0.92244
hsa-miR-4308	9.9524	3.82336	9.13349	11.1893	7.34567	8.28344	1.17077	0.227459	0.77326	0.923622
hsa-miR-101-2-5p	1.83671	1.61757	2.30554	2.17167	1.0736	1.20926	-1.20837	-0.273064	0.774147	0.923622
hsa-miR-5681a	7.17598	5.95561	7.09397	4.52948	10.6795	8.8276	1.17475	0.232348	0.774537	0.923622
hsa-miR-657	16.9575	0.220578	2.83759	4.81903	4.80293	6.83232	-1.22104	-0.288112	0.773783	0.923622
hsa-miR-1178-3p	5.89456	0.220578	0.532048	4.09514	0.282526	0.967409	-1.24551	-0.316741	0.774209	0.923622
hsa-miR-1225-5p	3.50256	0.514683	2.12819	3.66081	3.55982	0.302315	1.21959	0.286393	0.775263	0.923962
hsa-miR-4664-3p	19.0078	33.0867	14.8087	39.1934	20.1158	18.9854	1.17246	0.229541	0.778096	0.92681
hsa-miR-1269a	6.66341	1.91168	6.82795	5.19132	4.18138	8.88807	1.17995	0.238729	0.778681	0.92698
hsa-miR-1321	1.40957	6.17619	3.99036	3.5574	8.36276	1.81389	1.18947	0.250318	0.780811	0.928534
hsa-miR-6758-3p	1.15328	1.02937	0.177349	1.11686	1.86467	0.060463	1.26648	0.340823	0.780873	0.928534
hsa-miR-2682-5p	3.67342	3.74983	7.98072	3.61945	8.70179	5.74399	1.1741	0.231556	0.781483	0.928731
hsa-miR-5691	28.1914	3.16162	7.89204	14.6846	6.10255	12.6368	-1.17649	-0.234486	0.782833	0.929809
hsa-miR-3145-5p	1.66585	0.147052	5.5865	1.13754	1.97768	2.90223	-1.22936	-0.297904	0.784665	0.929874
hsa-miR-4756-3p	3.07542	2.05873	2.39421	4.92245	0.169515	1.08833	-1.20611	-0.270357	0.784591	0.929874
hsa-miR-6733-3p	4.57042	3.52925	7.98072	4.96381	6.27207	7.67881	1.17897	0.237532	0.784232	0.929874
hsa-miR-937-3p	3.84428	8.1614	5.67518	9.84489	5.14197	4.95797	1.14422	0.194364	0.784535	0.929874
hsa-miR-6770-3p	16.1887	8.1614	7.09397	13.7953	6.21556	7.07418	-1.16086	-0.215193	0.785585	0.930438
hsa-miR-4639-3p	1.70857	0.0735261	1.15277	2.58532	0.0565051	1.02787	1.24842	0.320104	0.786916	0.930962
hsa-miR-5739	6.53527	1.54405	2.48289	2.9576	4.4639	1.57204	-1.18802	-0.248559	0.786609	0.930962
hsa-miR-6888-5p	2.52014	2.94104	0.620722	2.29576	3.22079	1.87435	1.19056	0.251643	0.787505	0.931133
hsa-miR-518e-3p	1.11057	0.0735261	2.83759	0.847984	0.904082	1.45111	-1.25243	-0.32473	0.788131	0.931347
hsa-miR-802	0.298999	1.47052	0.0886746	2.17167	0.11301	0.060463	1.27814	0.354048	0.791847	0.933526
hsa-miR-3190-5p	6.57798	12.72	4.8771	3.10238	8.64528	8.94853	-1.17519	-0.232899	0.792276	0.933526
hsa-miR-3179	4.44227	0.147052	0.798072	2.66805	2.76875	1.1488	1.20499	0.269015	0.791508	0.933526
hsa-miR-12122	2.22114	2.05873	2.66024	3.22648	2.31671	0.241852	-1.18471	-0.244532	0.791977	0.933526
hsa-miR-106a-3p	3.33171	4.63214	2.03952	0.496381	4.63342	3.32547	-1.19703	-0.259464	0.790815	0.933526
hsa-miR-8057	20.6309	8.60255	9.22216	14.7673	9.9449	8.70668	-1.1533	-0.205774	0.79265	0.933526
hsa-miR-4524b-3p	7.56041	4.7792	0.886746	6.97002	2.03418	6.65094	1.17707	0.235198	0.795735	0.935717
hsa-miR-873-5p	0.0854284	4.63214	0.177349	1.28232	2.48623	0.060463	-1.27727	-0.353063	0.796257	0.935717
hsa-miR-4487	17.8118	6.61735	20.0405	11.8718	24.3537	14.9948	1.14963	0.201167	0.795795	0.935717
hsa-miR-1290	7.38955	2.94104	10.9957	8.54189	2.99477	6.89279	-1.152	-0.204135	0.797035	0.935717
hsa-miR-4757-5p	6.9197	3.89688	12.5031	8.85213	4.63342	6.95325	-1.13271	-0.179773	0.798085	0.935717
hsa-miR-1299	0.939712	2.42636	1.33012	1.79938	0.904082	1.02787	-1.19568	-0.257832	0.798079	0.935717
hsa-miR-4768-5p	5.08299	2.49989	1.50747	0.475698	3.22079	4.05102	-1.19405	-0.255868	0.79715	0.935717
hsa-miR-4659a-3p	5.04027	11.5436	1.77349	4.75698	8.13674	8.40436	1.15552	0.208546	0.797243	0.935717
hsa-miR-3682-5p	2.60557	1.61757	2.48289	3.16443	0.904082	3.74871	1.16504	0.220385	0.799428	0.936767
hsa-miR-3667-3p	9.14083	9.11724	14.0993	11.665	9.60587	15.4181	1.13932	0.188173	0.800398	0.936855
hsa-miR-3650	3.50256	6.32324	4.78843	6.20476	2.37321	8.28344	1.15805	0.211699	0.800198	0.936855
hsa-miR-6841-3p	0.0854284	1.9852	0.443373	1.46846	1.52564	0.120926	1.24971	0.32159	0.801024	0.937064
hsa-miR-1252-3p	2.17842	1.9852	4.43373	1.01344	4.06837	2.23713	-1.18232	-0.241616	0.80171	0.93713
hsa-miR-101-5p	1.36685	1.9852	2.83759	3.32989	0.508546	3.32547	1.17138	0.228203	0.802147	0.93713
hsa-miR-636	18.1962	2.57341	10.5523	5.3361	14.9739	15.4785	1.13788	0.18635	0.802423	0.93713
hsa-miR-8077	1.32414	3.82336	3.99036	4.09514	5.02896	1.39065	1.16483	0.220119	0.802879	0.937139
hsa-miR-3677-5p	5.04027	5.95561	5.76385	9.53465	6.04605	3.20454	1.13518	0.182927	0.804759	0.937263
hsa-miR-1253	19.6912	37.6454	27.3118	25.7911	11.527	36.3383	-1.14849	-0.199741	0.804534	0.937263
hsa-miR-4764-3p	8.20112	5.95561	8.15807	6.92865	9.77539	2.72084	-1.14784	-0.198916	0.80466	0.937263
hsa-miR-4482-3p	2.47742	1.32347	4.8771	7.19753	2.82526	0.181389	1.18281	0.242218	0.804775	0.937263
hsa-miR-3173-5p	6.15084	6.61735	6.38457	3.97105	5.70702	7.43695	-1.14141	-0.190822	0.806001	0.938169
hsa-miR-3683	1.62314	6.98498	1.41879	2.81283	5.19847	0.423241	-1.18777	-0.248256	0.807143	0.938455
hsa-miR-3677-3p	4.2287	5.88209	2.92626	5.95657	1.0736	8.16251	1.16386	0.218923	0.806975	0.938455
hsa-miR-892b	6.15084	4.63214	9.04481	5.95657	6.44158	10.2787	1.14191	0.191444	0.809648	0.940845
hsa-miR-642a-5p	7.64584	3.52925	3.45831	4.01241	3.61633	9.43224	1.14921	0.200646	0.810468	0.941276
hsa-miR-4636	2.22114	0.147052	3.81301	2.97829	2.03418	2.17667	1.16707	0.222897	0.814785	0.941797
hsa-miR-596	18.7515	4.55862	4.25638	20.1034	4.06837	7.61834	1.15154	0.203568	0.812979	0.941797
hsa-miR-4329	13.9675	11.1024	17.6462	11.5822	13.1092	23.3387	1.1214	0.165301	0.815864	0.941797
hsa-miR-2467-5p	1.87942	4.41157	10.3749	12.8439	2.82526	3.08362	1.13441	0.181946	0.814722	0.941797
hsa-miR-8064	2.73371	0.220578	0.177349	0	0.395536	2.11621	-1.27214	-0.347259	0.815215	0.941797
hsa-miR-18b-3p	1.83671	0.0735261	0.177349	0.227508	0.621556	0.906946	-1.25591	-0.328737	0.814766	0.941797
hsa-miR-938	1.11057	2.13226	0.0886746	1.13754	0.0565051	2.96269	1.23462	0.304065	0.814541	0.941797
hsa-miR-6077	7.5177	10.1466	9.84288	8.97622	9.04082	12.7577	1.12039	0.164007	0.815723	0.941797
hsa-miR-766-5p	2.90456	5.88209	0.620722	3.72286	1.29962	3.02315	-1.16843	-0.22457	0.811583	0.941797
hsa-let-7i-3p	26.9099	33.822	38.1301	4.94313	22.8846	57.8027	-1.15553	-0.20855	0.81492	0.941797
hsa-miR-147a	3.33171	4.55862	8.69011	4.46743	7.79771	2.05574	-1.1516	-0.203637	0.813899	0.941797
hsa-miR-8063	2.77642	0.147052	1.24144	2.27508	1.1301	0.060463	-1.20055	-0.263699	0.816407	0.941904
hsa-miR-4520-5p	2.13571	1.83815	1.24144	2.70941	2.93827	0.423241	1.16274	0.217531	0.817037	0.941927
hsa-miR-3151-5p	0.939712	3.74983	1.15277	2.23371	1.69515	0.967409	-1.17167	-0.228564	0.817326	0.941927
hsa-miR-1912-5p	2.13571	1.61757	1.86217	1.13754	3.67283	1.93482	1.16642	0.222093	0.817783	0.941935
hsa-miR-517-5p	5.59556	0.294104	4.61108	6.34954	5.98954	0.060463	1.17961	0.238315	0.818581	0.942004
hsa-miR-4794	0.640713	0.0735261	5.67518	1.03413	3.84235	2.7813	1.20067	0.263845	0.819792	0.942004
hsa-miR-4320	3.41713	1.91168	4.25638	6.9907	0.960587	0.181389	-1.16906	-0.225344	0.821017	0.942004
hsa-miR-4316	1.87942	7.27908	4.8771	7.25957	4.18138	4.23241	1.13067	0.177183	0.820351	0.942004
hsa-miR-921	9.26898	9.55839	0.709397	15.4499	1.35612	5.74399	1.15389	0.206509	0.820251	0.942004
hsa-miR-4303	1.196	4.33804	3.10361	0.930714	3.05128	3.44639	-1.16876	-0.224977	0.819532	0.942004
hsa-miR-3150a-3p	5.55284	0.514683	2.57156	4.50879	1.24311	1.69297	-1.16026	-0.214453	0.821442	0.942004
hsa-miR-7109-5p	4.39956	2.35283	1.0641	2.54395	2.03418	4.65565	1.1523	0.20451	0.821356	0.942004
hsa-miR-8068	10.6358	3.0881	3.10361	9.63807	4.80293	4.59519	1.12566	0.170771	0.822481	0.942679
hsa-miR-211-3p	1.75128	4.99977	4.25638	0.847984	8.30625	0.181389	-1.181	-0.240011	0.823394	0.94283
hsa-miR-4776-5p	4.5277	5.80856	1.95084	3.49535	3.67283	3.74871	-1.14114	-0.190471	0.823513	0.94283
hsa-miR-4645-3p	2.69099	1.9852	0.798072	1.98552	3.3338	1.1488	1.15206	0.204214	0.824116	0.943005
hsa-miR-892a	3.9297	2.42636	5.14313	4.21924	4.52041	4.17195	1.12885	0.174858	0.82599	0.944118
hsa-miR-622	1.36685	0.588209	0.532048	1.40641	0.565051	0.060463	-1.20492	-0.268941	0.825889	0.944118
hsa-miR-9903	3.97242	0.0735261	2.66024	2.15098	3.10778	0.483704	-1.172	-0.228968	0.827362	0.94517
hsa-miR-5197-5p	2.26385	0.220578	0.266024	0.289556	2.2037	0.967409	1.20854	0.27326	0.828823	0.945853
hsa-miR-4733-3p	3.88699	0.0735261	6.20722	0.496381	3.16429	5.01843	-1.17585	-0.233699	0.829767	0.945853
hsa-miR-4317	3.58799	10.2201	2.03952	13.2989	3.44681	1.20926	1.13684	0.185026	0.828869	0.945853
hsa-miR-1261	50.5736	61.2472	102.685	35.5119	80.9153	71.7696	-1.13999	-0.189026	0.829391	0.945853
hsa-miR-6758-5p	1.495	1.61757	1.77349	0.723889	3.10778	1.99528	1.16639	0.222055	0.830739	0.946033
hsa-miR-4330	9.69612	13.7494	1.15277	5.5636	11.4705	10.9438	1.13324	0.180457	0.830829	0.946033
hsa-miR-548aw	3.28899	0.147052	3.01494	2.7301	2.2037	2.53945	1.15297	0.20536	0.831354	0.946117
hsa-miR-1257	4.39956	0.147052	0.354698	1.44778	1.80816	0.967409	-1.17987	-0.238627	0.831866	0.946186
hsa-miR-9898	1.62314	0.147052	1.86217	0.910032	1.58214	1.87435	1.18208	0.241322	0.837359	0.946583
hsa-miR-3169	2.52014	4.63214	1.24144	0.558429	2.2037	4.59519	-1.15542	-0.208423	0.838123	0.946583
hsa-miR-4715-5p	38.8699	8.30845	7.27132	28.211	30.9083	3.08362	1.14111	0.190436	0.837065	0.946583
hsa-miR-8076	2.39199	3.82336	2.12819	2.79214	4.4074	0	-1.15864	-0.212438	0.836417	0.946583
hsa-miR-6825-3p	4.31413	1.47052	1.41879	0.661841	2.48623	5.32075	1.15227	0.204473	0.838682	0.946583
hsa-miR-627-3p	6.83427	2.20578	5.5865	8.85213	2.03418	5.5626	1.12632	0.171611	0.8399	0.946583
hsa-miR-4290	18.1535	5.44093	6.91662	12.0166	9.8884	12.5763	1.12254	0.166769	0.835346	0.946583
hsa-miR-4706	0.811569	1.54405	0.177349	1.7787	0.169515	0.120926	-1.19597	-0.258185	0.838673	0.946583
hsa-miR-6124	8.24384	7.86729	3.90168	9.16237	4.06837	4.77658	-1.10768	-0.147536	0.838079	0.946583
hsa-miR-7974	17.0002	26.1018	11.173	10.4033	34.8637	15.8413	1.12347	0.167964	0.835154	0.946583
hsa-miR-4451	7.2187	17.5727	8.69011	9.4726	12.3181	15.4181	1.11051	0.151225	0.838467	0.946583
hsa-miR-3147	6.0227	3.74983	8.24674	12.1407	4.80293	2.96269	1.11352	0.155123	0.834422	0.946583
hsa-miR-5701	10.2941	15.7346	6.11855	12.5129	10.0579	6.34862	-1.10921	-0.149535	0.839848	0.946583
hsa-miR-518d-5p	4.01513	9.04371	6.20722	5.00518	5.87653	10.5206	1.10978	0.150271	0.839414	0.946583
hsa-miR-12121	5.04027	17.8668	3.45831	8.12824	10.51	10.6415	1.10966	0.150115	0.838787	0.946583
hsa-miR-4435	12.0454	6.7644	24.8289	11.8511	22.3195	14.3902	1.11357	0.15519	0.83746	0.946583
hsa-miR-491-3p	0.726141	0	1.59614	0.0620476	1.80816	0	-1.25052	-0.322524	0.835448	0.946583
hsa-miR-6511b-5p	0.939712	1.91168	0.266024	0.951397	0.621556	2.17667	1.17791	0.236234	0.841292	0.947641
hsa-miR-5189-3p	1.11057	1.6911	0.620722	0.744572	0.395536	1.87435	-1.16627	-0.221907	0.841824	0.947731
hsa-miR-6735-3p	4.31413	17.7933	7.27132	11.9545	10.736	9.79501	1.10902	0.149283	0.844661	0.949903
hsa-miR-203a-3p	6.27898	0.294104	6.20722	5.41883	2.88176	6.16723	1.13	0.176326	0.844556	0.949903
hsa-miR-3714	11.2338	3.97041	1.59614	2.44054	12.0921	0.181389	-1.14604	-0.196659	0.851052	0.950019
hsa-miR-4517	2.22114	0.147052	4.8771	4.83972	0.565051	0.846483	-1.14842	-0.199653	0.849993	0.950019
hsa-miR-513b-3p	0.683427	0	2.39421	1.69597	0.960587	0.906946	1.17324	0.230492	0.852315	0.950019
hsa-miR-4724-5p	5.21113	0.220578	5.32048	2.33713	5.65051	1.45111	-1.14254	-0.192239	0.853539	0.950019
hsa-miR-1178-5p	2.34928	2.20578	2.57156	6.10135	1.1301	0.665094	1.12261	0.166853	0.850833	0.950019
hsa-miR-140-5p	295.625	448.73	603.608	188.211	587.314	425.116	-1.12275	-0.167031	0.852233	0.950019
hsa-miR-4272	3.33171	2.57341	3.81301	3.04033	2.99477	2.35806	-1.12046	-0.164096	0.851001	0.950019
hsa-miR-4714-3p	6.27898	0.735261	0.177349	2.10962	2.93827	1.33019	-1.141	-0.1903	0.853083	0.950019
hsa-miR-1207-3p	5.38199	6.10267	4.43373	6.8666	4.01186	3.32547	-1.1015	-0.139473	0.851971	0.950019
hsa-miR-5587-3p	15.8897	1.83815	4.96578	6.0393	11.9226	7.37649	1.10965	0.150101	0.85063	0.950019
hsa-miR-1234-3p	2.60557	4.48509	0.620722	2.87487	4.18138	1.69297	1.12735	0.172933	0.853838	0.950019
hsa-miR-11400	13.8394	5.0733	7.18264	16.0703	4.18138	8.64622	1.10706	0.146735	0.848895	0.950019
hsa-miR-637	0.213571	0.588209	2.12819	0.310238	1.75166	0.362778	-1.20204	-0.265487	0.845613	0.950019
hsa-miR-8069	3.88699	3.3822	2.12819	0.620476	1.29962	6.40908	-1.1422	-0.191819	0.84611	0.950019
hsa-miR-6076	2.73371	0.441157	1.41879	2.39918	1.52564	1.33019	1.12849	0.17439	0.853435	0.950019
hsa-miR-1289	1.23871	0.441157	0.354698	1.07549	0.0565051	1.33019	1.17908	0.237667	0.848217	0.950019
hsa-miR-3907	0.555284	2.57341	0.620722	1.71665	0	2.66037	1.16606	0.221639	0.852731	0.950019
hsa-miR-182-3p	14.1811	5.14683	8.24674	11.9338	5.70702	7.43695	-1.10022	-0.137788	0.853053	0.950019
hsa-miR-3138	0.982426	0.36763	3.19229	2.31644	1.24311	0.302315	-1.15035	-0.202067	0.851455	0.950019
hsa-miR-7843-3p	18.4098	23.3813	12.6805	35.4706	13.3917	12.0321	1.12034	0.163942	0.849359	0.950019
hsa-miR-3150a-5p	24.1762	7.42614	6.6506	17.0838	10.9055	6.59047	-1.10813	-0.148127	0.856811	0.95053
hsa-miR-3918	2.69099	0.661735	2.48289	1.59256	2.2602	1.39065	-1.12906	-0.175126	0.856845	0.95053
hsa-miR-571	59.629	19.1903	18.0896	45.6257	38.819	0.967409	-1.13478	-0.182408	0.857021	0.95053
hsa-miR-6886-3p	6.49256	0	2.57156	6.26681	0.678061	3.44639	1.14347	0.193422	0.855251	0.95053
hsa-miR-190a-3p	3.84428	0	0.0886746	0.599794	0.339031	3.80917	1.18804	0.248579	0.855913	0.95053
hsa-miR-6512-3p	6.27898	1.54405	5.9412	6.05999	5.59401	3.68825	1.11346	0.155053	0.855243	0.95053
hsa-miR-6864-5p	4.91213	2.79399	0.532048	3.30921	1.97768	4.11149	1.12431	0.169043	0.858012	0.951127
hsa-miR-614	9.61069	7.35261	6.82795	17.9111	4.63342	3.50686	1.09915	0.136393	0.858927	0.951369
hsa-miR-3912-5p	6.6207	1.61757	0.266024	3.86764	2.14719	1.57204	-1.12866	-0.174613	0.85914	0.951369
hsa-miR-4252	2.47742	0.147052	4.69975	4.69494	0.22602	1.45111	-1.14171	-0.191202	0.861956	0.953983
hsa-miR-4293	5.1257	4.48509	4.78843	6.6391	3.2773	5.62306	1.09095	0.125579	0.862677	0.954277
hsa-miR-4497	7.5177	0.661735	1.68482	1.53051	6.04605	1.33019	-1.1196	-0.162979	0.865506	0.956901
hsa-miR-4519	6.15084	16.4698	7.44867	8.89349	12.4311	6.46955	-1.08004	-0.11109	0.869049	0.95704
hsa-miR-3065-5p	1.28143	2.05873	0.177349	1.63392	1.29962	0.120926	-1.14826	-0.199445	0.868297	0.95704
hsa-miR-6752-3p	7.17598	7.0585	16.4935	12.12	7.91072	7.92066	-1.08892	-0.122893	0.867512	0.95704
hsa-miR-4456	10.4223	14.117	8.77879	19.3175	10.4534	6.53001	1.09475	0.130605	0.867665	0.95704
hsa-miR-891b	1.23871	5.66151	1.77349	1.22027	2.93827	5.5626	1.11517	0.15727	0.868553	0.95704
hsa-miR-3192-3p	12.8143	17.5727	7.89204	13.6505	9.26684	12.3345	-1.0859	-0.118895	0.869289	0.95704
hsa-miR-1587	5.1257	7.72024	10.5523	6.24613	11.5835	3.56732	-1.08999	-0.124321	0.868815	0.95704
hsa-miR-6796-5p	6.10813	3.16162	0.709397	3.57808	4.01186	1.51158	-1.10602	-0.145376	0.868712	0.95704
hsa-miR-490-5p	1.02514	2.20578	8.51276	4.19856	3.72934	2.53945	-1.11023	-0.150857	0.87178	0.958427
hsa-miR-2116-3p	4.31413	2.13226	10.5523	6.08067	5.02896	7.37649	1.09257	0.127726	0.871412	0.958427
hsa-miR-4804-5p	11.5755	13.6023	8.15807	10.9824	10.3404	9.67409	-1.07886	-0.109504	0.871921	0.958427
hsa-miR-1247-5p	7.00513	0.147052	1.15277	6.18408	1.41263	1.75343	1.12084	0.164574	0.873335	0.958974
hsa-miR-135a-2-3p	5.76641	1.54405	0.532048	3.24716	0.11301	3.62778	-1.12892	-0.174949	0.873236	0.958974
hsa-miR-3646	1.66585	8.7496	2.83759	2.7301	2.82526	6.40908	-1.10897	-0.149215	0.87384	0.959025
hsa-miR-6134	22.5958	36.8366	13.3899	11.0445	30.8518	24.7294	-1.09543	-0.131496	0.875389	0.959217
hsa-miR-593-5p	1.15328	1.9852	2.30554	2.21303	0.11301	2.47898	-1.12374	-0.168307	0.874647	0.959217
hsa-miR-6810-5p	2.77642	0	1.59614	2.2544	2.48623	0.241852	1.13311	0.180289	0.874953	0.959217
hsa-miR-5186	8.67098	9.48487	4.69975	7.01138	6.55459	7.67881	-1.08907	-0.123094	0.875998	0.959382
hsa-miR-105-5p	43.0132	12.4994	5.67518	24.2813	26.2749	16.3855	1.09162	0.126476	0.87769	0.960734
hsa-miR-6846-5p	0.51257	2.72047	0.709397	1.63392	0.960587	1.75343	1.11513	0.157214	0.879399	0.961599
hsa-miR-5572	7.38955	6.32324	8.86746	9.70011	7.17615	6.77186	1.071	0.0989519	0.879364	0.961599
hsa-miR-6760-3p	7.85941	5.80856	7.80337	8.37643	3.89885	7.49742	-1.07923	-0.110002	0.87987	0.961611
hsa-miR-4423-3p	1.36685	0.36763	0.443373	0.827302	0.11301	1.02787	-1.13864	-0.187308	0.880795	0.962121
hsa-miR-4747-5p	6.36441	7.13203	2.66024	1.6546	9.66237	3.50686	-1.0986	-0.13567	0.881367	0.962243
hsa-miR-4491	4.18599	8.1614	1.50747	6.12203	5.02896	1.51158	-1.09194	-0.126897	0.882441	0.962446
hsa-miR-19a-5p	1.53771	3.82336	0.354698	2.37849	3.05128	0.906946	1.10609	0.145474	0.882472	0.962446
hsa-miR-1537-3p	25.7139	25.5136	14.2766	30.0931	14.8043	15.2972	-1.08656	-0.119768	0.883595	0.962669
hsa-miR-6746-5p	1.11057	10.8083	5.2318	11.4374	5.02896	2.11621	1.08896	0.122955	0.883331	0.962669
hsa-miR-4793-5p	7.85941	3.30867	36.9773	10.5274	16.443	17.232	-1.08832	-0.122105	0.884162	0.962785
hsa-miR-548av-3p	2.77642	2.13226	1.86217	1.38573	1.63865	4.59519	1.09624	0.13257	0.888121	0.963089
hsa-miR-548ag	1.02514	6.69087	0.798072	4.61221	2.37321	2.2976	1.09555	0.131653	0.887023	0.963089
hsa-miR-4690-3p	8.92726	1.76463	0.443373	1.44778	2.54273	8.46483	1.10725	0.146986	0.885232	0.963089
hsa-miR-6850-3p	10.2087	10.0731	10.907	12.5129	11.4705	8.88807	1.07506	0.104417	0.888117	0.963089
hsa-miR-7160-5p	3.67342	1.24994	3.72433	1.53051	5.25498	2.7813	1.09238	0.127475	0.886836	0.963089
hsa-miR-6073	1.87942	0.294104	0.0886746	0.992762	1.58214	0.060463	1.13429	0.181785	0.886444	0.963089
hsa-miR-3164	3.50256	0.147052	2.57156	5.60497	0.0565051	1.26972	1.11539	0.157544	0.887482	0.963089
hsa-miR-1296-5p	2.73371	5.58798	0.620722	2.37849	4.4074	3.08362	1.09496	0.130873	0.887951	0.963089
hsa-miR-187-5p	9.73883	29.8516	5.67518	10.7136	25.0883	6.0463	-1.08224	-0.114026	0.889331	0.963747
hsa-miR-3680-3p	3.03271	0.0735261	2.30554	2.91624	1.29962	0.665094	-1.10623	-0.145649	0.889648	0.963747
hsa-miR-3605-5p	4.91213	7.35261	3.28096	2.04757	5.87653	6.53001	-1.08787	-0.121505	0.890523	0.964196
hsa-miR-5692a	1.36685	2.20578	2.12819	2.46122	3.72934	0.060463	1.09927	0.136544	0.895109	0.96766
hsa-miR-10392-5p	5.59556	0.808787	5.76385	5.46019	3.72934	3.99056	1.08285	0.114827	0.894773	0.96766
hsa-miR-548au-3p	3.28899	0.147052	1.41879	2.54395	1.0736	1.75343	1.09491	0.130809	0.895025	0.96766
hsa-miR-3689d	2.90456	3.0881	2.12819	3.95037	1.1301	2.2976	-1.08252	-0.114392	0.895862	0.967975
hsa-miR-3649	1.11057	0.147052	2.74891	0.496381	1.92117	2.05574	1.11104	0.151908	0.899815	0.971744
hsa-miR-6746-3p	16.6585	2.86752	8.69011	8.97622	3.72934	13.7251	-1.07093	-0.09886	0.90337	0.973631
hsa-miR-10392-3p	11.661	6.39677	2.66024	7.13548	12.0356	3.14408	1.07112	0.0991219	0.902644	0.973631
hsa-miR-3664-3p	14.651	6.91145	17.9123	16.6908	5.65051	14.5111	-1.06908	-0.0963671	0.903887	0.973631
hsa-miR-5702	4.27142	2.86752	0.709397	2.85419	2.82526	1.69297	-1.07942	-0.11026	0.903668	0.973631
hsa-miR-4312	4.69856	2.57341	13.1238	8.23165	3.78584	9.73455	1.07071	0.0985671	0.903347	0.973631
hsa-miR-4321	15.2062	5.88209	5.5865	6.74251	5.25498	13.3019	-1.0627	-0.0877338	0.90474	0.974049
hsa-miR-583	3.80156	2.42636	2.57156	4.17787	4.01186	1.20926	1.06896	0.0962034	0.905984	0.974137
hsa-miR-582-5p	30.2844	51.8359	76.1715	8.19029	70.3489	68.7465	-1.07504	-0.104387	0.906217	0.974137
hsa-miR-6894-3p	4.91213	8.08787	7.18264	7.98346	5.31148	7.8602	1.06652	0.0929064	0.906017	0.974137
hsa-miR-6837-3p	3.41713	6.91145	18.1783	9.84489	7.00663	9.9764	-1.05712	-0.0801346	0.909234	0.976436
hsa-miR-3940-5p	20.2038	32.8662	48.3277	25.0879	43.0004	39.9661	1.06649	0.092872	0.909653	0.976436
hsa-miR-587	1.495	0.220578	0.354698	0.0620476	0.565051	1.33019	-1.11388	-0.155593	0.909754	0.976436
hsa-miR-141-5p	4.01513	2.35283	5.40915	1.46846	3.50332	6.16723	-1.06759	-0.0943533	0.911395	0.977695
hsa-miR-944	3.28899	1.17642	0.354698	0.682524	2.48623	2.23713	1.08597	0.11899	0.912612	0.9785
hsa-miR-1825	17.0857	5.80856	0.709397	6.47364	6.44158	9.37177	-1.06392	-0.0893907	0.913951	0.978544
hsa-miR-376a-5p	1.87942	1.397	4.78843	1.07549	2.37321	5.26029	1.07644	0.106264	0.914056	0.978544
hsa-miR-4752	14.8218	5.29388	5.49783	9.76216	6.49809	8.10205	-1.05803	-0.0813775	0.913809	0.978544
hsa-miR-4795-3p	7.60312	3.30867	11.5277	4.32265	8.8713	8.04159	-1.05967	-0.0836124	0.914622	0.97865
hsa-miR-6867-5p	4.39956	3.30867	16.5822	10.5274	9.8884	5.13936	1.05733	0.0804251	0.915234	0.978805
hsa-miR-1266-5p	6.15084	2.79399	4.43373	9.10032	2.76875	0.665094	-1.06234	-0.0872469	0.918109	0.980878
hsa-miR-4504	0.597999	2.94104	0.177349	2.1303	1.01709	0.241852	-1.08428	-0.116738	0.9181	0.980878
hsa-miR-3690	6.96241	4.85272	3.45831	5.23268	5.36799	6.10677	1.05945	0.0833118	0.919223	0.981067
hsa-miR-6730-3p	3.41713	1.61757	5.05445	5.19132	1.1301	3.08362	-1.06091	-0.0853034	0.918761	0.981067
hsa-miR-9851-5p	2.09299	2.05873	6.38457	7.03206	1.46913	2.53945	1.06297	0.0881054	0.920208	0.981248
hsa-miR-500a-3p	4.48499	1.6911	0.443373	3.88832	2.09069	0.181389	-1.07733	-0.107462	0.92033	0.981248
hsa-miR-4494	0.726141	3.0881	5.2318	1.84075	3.3338	3.265	-1.06512	-0.0910212	0.921987	0.981469
hsa-miR-1252-5p	3.88699	3.6763	8.33541	5.89452	2.99477	7.79973	1.0569	0.079841	0.922316	0.981469
hsa-miR-4294	186.063	223.299	73.2452	187.446	43.2829	282.665	1.06368	0.0890692	0.922412	0.981469
hsa-miR-7154-5p	0.128143	2.79399	1.24144	0.310238	1.75166	2.47898	1.0861	0.119157	0.922015	0.981469
hsa-miR-5694	2.73371	0.588209	2.48289	1.15822	0.508546	3.80917	-1.07275	-0.10131	0.924451	0.982186
hsa-miR-1267	3.45985	3.16162	6.47325	4.34333	5.25498	3.99056	1.05491	0.0771225	0.925162	0.982186
hsa-miR-6720-3p	3.88699	10.0731	10.1089	12.4302	5.31148	4.89751	-1.05243	-0.073722	0.925431	0.982186
hsa-miR-6789-3p	4.61313	0.36763	1.15277	4.92245	0.678061	0.967409	1.06829	0.0953064	0.924906	0.982186
hsa-miR-6808-3p	4.35685	4.85272	5.32048	3.76422	5.65051	4.59519	-1.05406	-0.0759514	0.925232	0.982186
hsa-miR-676-5p	0.939712	0	6.56192	0.806619	4.91595	1.20926	-1.08189	-0.113556	0.926605	0.982909
hsa-miR-1236-5p	0.427142	0.147052	2.30554	1.94416	0.452041	0.181389	-1.08287	-0.114861	0.927051	0.982909
hsa-miR-520f-5p	0.555284	0.220578	3.81301	0.641159	1.69515	2.59991	1.07867	0.109248	0.928184	0.983612
hsa-miR-205-3p	1.66585	2.42636	3.01494	2.50259	2.03418	1.69297	-1.05578	-0.0783109	0.93015	0.985196
hsa-miR-6857-5p	12.6007	1.91168	2.21687	11.1065	1.69515	4.83704	1.05179	0.0728409	0.930835	0.985424
hsa-miR-186-5p	22.9802	18.0139	23.4988	7.79732	31.3603	22.6736	-1.04578	-0.0645727	0.935103	0.985974
hsa-miR-582-3p	1.92214	0.588209	2.83759	1.79938	0.678061	3.20454	1.06077	0.0851108	0.931872	0.985974
hsa-miR-602	0.170857	1.10289	4.43373	1.44778	3.84235	0	-1.07588	-0.105516	0.933568	0.985974
hsa-miR-100-5p	21958.4	35991.4	32841.6	5469.68	47459.4	42587.2	1.05204	0.07319	0.933068	0.985974
hsa-miR-4661-3p	59.9707	25.1459	8.15807	21.5926	40.9662	35.7337	1.05179	0.0728467	0.933962	0.985974
hsa-miR-6871-5p	6.9197	8.38197	1.41879	6.14272	7.91072	3.56732	1.0494	0.0695637	0.937005	0.985974
hsa-miR-5579-5p	1.75128	2.49989	1.24144	1.28232	0.452041	3.50686	-1.06064	-0.0849393	0.935725	0.985974
hsa-miR-4436a	2.73371	1.32347	0.354698	1.86143	1.0736	1.33019	-1.05847	-0.0819801	0.935608	0.985974
hsa-miR-181a-3p	109.904	225.357	286.064	34.0435	276.706	279.823	-1.05215	-0.0733365	0.936804	0.985974
hsa-miR-1915-3p	10.9348	1.9852	3.99036	10.5481	3.55982	3.56732	1.04366	0.0616495	0.936408	0.985974
hsa-miR-4268	3.80156	9.19076	3.99036	6.88729	2.93827	6.28816	-1.04791	-0.0675207	0.934823	0.985974
hsa-miR-452-3p	1.495	3.23515	4.07903	3.20579	0.621556	4.47427	-1.05374	-0.0755182	0.93558	0.985974
hsa-miR-7153-3p	7.30413	11.8377	2.74891	13.8159	4.35089	4.59519	1.04245	0.0599783	0.939286	0.986392
hsa-miR-151a-5p	2517.53	3196.69	4807.49	583.103	5455.96	5006.82	1.04981	0.070132	0.939282	0.986392
hsa-miR-3663-3p	2.13571	0.294104	0.177349	0.268873	1.92117	0.725557	1.07091	0.0988343	0.938756	0.986392
hsa-miR-3156-3p	229.033	406.452	473.522	318.428	272.185	470.826	-1.04468	-0.0630669	0.938337	0.986392
hsa-miR-132-3p	32.8045	7.79377	28.6419	0.537746	43.2829	28.2362	1.03984	0.056362	0.952165	0.987035
hsa-miR-3184-3p	0.939712	1.17642	6.56192	3.35057	4.12487	1.45111	1.03928	0.055591	0.954659	0.987035
hsa-miR-510-5p	1.45228	3.74983	0.0886746	3.51603	1.97768	0.060463	1.05101	0.0717789	0.948659	0.987035
hsa-miR-6805-5p	8.11569	3.3822	0.975421	2.50259	2.88176	7.79973	1.04433	0.0625776	0.94735	0.987035
hsa-miR-135a-3p	21.9978	2.57341	1.0641	13.6918	4.57691	6.40908	-1.04114	-0.0581622	0.950345	0.987035
[truncated: 95 more rows]
