# Supplementary material for: Distinct brain and lung endothelial miRNA/mRNA profiles after exposure to Plasmodium falciparum-infected red blood cells
Source: iScience. 2024 Oct 28;27(11):111265. doi: 10.1016/j.isci.2024.111265 (PMC11576406; doi:10.1016/j.isci.2024.111265)
Supplement: Table S5. mRNA profiles of HBMEC1.5 and HBMECstatic [file mmc6.xlsx]

## Sheet: 1.5 dyne
Name	HBMEC-Satic#1	HBMEC-Satic#2	HBMEC-Satic#3	HBMEC-Flow#1	HBMEC-Flow#2	HBMEC-Flow#3	Fold change	Log fold change	P-value	FDR p-value
MT-ND4	37.8228	28.1106	21.1978	5919.66	7637.03	5920.91	223.793	7.80602	9.24011e-60	1.09902e-55
MT-CO3	15.4093	12.2984	14.1319	2738.35	3357.11	3586.48	225.246	7.81535	8.2148e-54	4.88534e-50
MT-ATP6	4.20253	19.326	14.1319	2206.21	2609.32	2955.37	207.53	7.69718	2.09191e-46	8.29372e-43
MT-ND1	54.6329	45.6797	47.1062	2004.86	2529.77	3420.22	53.6094	5.74441	1.36349e-35	4.05433e-32
CTSB	67.2405	63.2488	64.771	2421.94	2402.48	4034.36	45.2027	5.49834	6.64729e-34	1.58126e-30
CDKN1A	23.8144	15.8122	15.3095	1101.67	965.235	1269.01	60.3363	5.91495	2.53282e-33	5.02089e-30
BSG	8.40507	1.75691	14.1319	673.081	472.011	946.668	78.736	6.29895	2.36384e-31	4.01651e-28
HLA-E	8.40507	17.5691	7.06593	540.766	625.812	1316.51	76.0373	6.24863	1.7278e-30	2.28338e-27
PTTG1IP	11.2068	10.5415	4.71062	526.384	376.548	607.36	58.1467	5.86162	1.65215e-30	2.28338e-27
SRGN	9.80591	10.5415	16.4872	667.328	424.279	468.244	40.8998	5.35402	2.35522e-30	2.8013e-27
MT-CYB	127.477	112.442	68.304	3166.93	3293.47	3114.84	31.4741	4.97609	8.26783e-29	8.93978e-26
MT-ND2	88.2532	57.978	45.9285	2122.79	2858.58	1842.44	35.4202	5.1465	1.6157e-28	1.60143e-25
MT-ND5	44.827	17.5691	35.3296	2249.36	2264.59	760.049	53.0887	5.73033	1.80815e-27	1.65432e-24
B2M	16.8101	33.3813	38.8626	779.509	1172.07	1771.18	41.3494	5.3698	3.01376e-27	2.45873e-24
SLC25A6	9.80591	0	3.53296	457.35	371.244	1184.18	138.899	7.11789	3.1008e-27	2.45873e-24
UCHL1	1.40084	3.51382	4.71062	491.867	323.513	648.077	139.493	7.12405	6.56414e-27	4.87962e-24
QSOX1	29.4177	24.5967	32.9743	627.059	631.115	899.165	24.3339	4.6049	9.85347e-27	6.89395e-24
XRCC6	5.60338	3.51382	4.71062	270.383	228.05	332.521	57.046	5.83405	3.40221e-26	2.2481e-23
MMP14	0	8.78455	21.1978	549.395	456.1	709.152	54.6489	5.77212	4.26724e-26	2.67129e-23
KCTD12	2.80169	1.75691	8.24358	512.002	1272.84	257.874	143.99	7.16982	9.86337e-26	5.86574e-23
PTGR1	0	1.75691	2.35531	825.531	954.628	1635.46	689.494	9.42939	1.15737e-25	6.55513e-23
PECAM1	130.279	115.956	91.8571	1863.92	3526.82	3572.91	26.4899	4.72737	2.25098e-25	1.21696e-22
RCN1	57.4346	35.1382	38.8626	914.7	1267.53	1757.61	29.6981	4.8923	4.154e-25	2.14816e-22
SERPINE1	313.789	65.0057	93.0347	6290.72	9307.63	6114.32	45.8955	5.52028	4.55235e-25	2.25607e-22
NES	4.20253	7.02764	3.53296	230.113	212.14	325.735	52.1908	5.70572	9.86903e-25	4.69529e-22
CFLAR	16.8101	8.78455	16.4872	373.934	525.046	305.377	27.0382	4.75693	2.40953e-24	1.10227e-21
HLA-B	5.60338	7.02764	4.71062	198.473	397.762	885.592	83.0617	6.37611	2.81186e-24	1.23867e-21
LAMC2	7.00422	1.75691	2.35531	244.495	403.065	346.094	81.7538	6.35321	3.60375e-24	1.53082e-21
PGF	5.60338	3.51382	8.24358	192.72	450.797	1272.4	103.738	6.6968	4.04508e-24	1.65904e-21
FBLIM1	2.80169	5.27073	10.5989	250.248	180.319	335.914	38.3071	5.25954	4.91712e-24	1.88659e-21
RPS15A	7.00422	10.5415	15.3095	396.945	307.602	1425.09	63.0173	5.97768	4.88608e-24	1.88659e-21
NID1	1580.15	1424.85	1821.83	23.0113	79.5524	40.7169	-37.4942	-5.22859	7.26938e-24	2.41024e-21
TGOLN2	5.60338	10.5415	10.5989	290.518	381.851	173.047	30.5209	4.93173	6.73095e-24	2.41024e-21
IGFBP7	7.00422	1.75691	3.53296	310.653	233.354	519.14	80.0995	6.32372	7.29516e-24	2.41024e-21
OPTN	15.4093	10.5415	17.6648	230.113	228.05	301.984	16.7468	4.06581	7.20933e-24	2.41024e-21
MAP1LC3B	5.60338	7.02764	11.7765	483.238	323.513	230.729	40.4201	5.337	7.16155e-24	2.41024e-21
CTSL	7.00422	14.0553	7.06593	281.889	169.712	386.81	30.3979	4.9259	8.46751e-24	2.72196e-21
CD93	32.2194	28.1106	24.7307	791.014	1076.61	407.169	26.4836	4.72703	1.44909e-23	4.53566e-21
PSAP	159.696	149.337	161.339	2700.95	2847.97	4377.07	21.0547	4.39607	2.19646e-23	6.69864e-21
TXNDC5	21.0127	57.978	56.5274	1196.59	1575.14	1051.85	28.0867	4.81181	3.03844e-23	9.0348e-21
MT-ND6	32.2194	14.0553	16.4872	483.238	487.921	1404.73	37.3265	5.22213	3.48449e-23	1.01084e-20
SHISA5	8.40507	14.0553	12.9542	253.125	233.354	444.493	26.0473	4.70306	5.25011e-23	1.48678e-20
FERMT3	5.60338	0	1.17765	304.9	275.782	363.059	122.907	6.94142	9.36814e-23	2.59127e-20
ICAM2	30.8186	22.8398	21.1978	601.171	434.886	1652.43	35.6375	5.15532	1.54294e-22	4.17084e-20
NEU1	2.80169	8.78455	9.42124	218.608	185.622	322.342	33.65	5.07253	1.71196e-22	4.52491e-20
TACC1	29.4177	24.5967	17.6648	442.968	779.613	322.342	21.3331	4.41502	2.68446e-22	6.94108e-20
MMRN2	14.0084	12.2984	2.35531	207.102	387.155	396.99	34.9106	5.12559	3.32595e-22	8.41677e-20
PRXL2A	0	1.75691	2.35531	402.698	546.26	641.291	319.37	8.31909	4.34608e-22	1.07692e-19
MAP1A	7.00422	3.51382	7.06593	460.227	302.299	145.902	48.4988	5.59988	4.80914e-22	1.16735e-19
CD44	14.0084	17.5691	21.1978	537.89	249.264	356.273	21.4626	4.42375	1.03067e-21	2.45176e-19
SLC29A1	8.40507	0	1.17765	224.36	201.533	318.949	70.9289	6.1483	2.78512e-21	6.49534e-19
NOS3	2632.19	3190.55	3464.66	129.439	153.801	200.191	-19.2429	-4.26625	3.55298e-21	8.12676e-19
ANKRD1	16.8101	7.02764	4.71062	238.743	636.419	264.66	38.8185	5.27867	4.60606e-21	1.02063e-18
ADAMTS1	1550.73	1488.1	1606.32	83.4161	74.2489	40.7169	-23.3657	-4.54632	4.63377e-21	1.02063e-18
ITGB5	2.80169	1.75691	1.17765	293.394	254.568	485.21	162.658	7.34569	7.90901e-21	1.71036e-18
ADGRL4	22.4135	10.5415	12.9542	244.495	440.19	251.087	19.6156	4.29393	9.54848e-21	2.02803e-18
SLC25A4	846.11	715.062	639.466	11.5057	0	6.78615	-98.3133	-6.61931	1.57086e-20	3.27785e-18
NTN4	4.20253	3.51382	3.53296	244.495	434.886	111.971	65.4431	6.03217	2.56119e-20	5.25221e-18
PFKP	7.00422	5.27073	10.5989	230.113	127.284	237.515	24.8684	4.63624	4.78248e-20	9.64115e-18
SRP14	1.40084	1.75691	5.88827	152.45	233.354	332.521	68.6286	6.10074	5.10792e-20	1.01256e-17
HMOX1	229.739	124.741	259.084	3330.89	3044.2	4641.73	17.8507	4.15791	5.92068e-20	1.15444e-17
NARF	5.60338	3.51382	4.71062	149.574	175.015	373.238	47.4669	5.56885	1.00724e-19	1.93227e-17
NOP58	585.553	565.725	534.655	25.8877	26.5175	23.7515	-21.965	-4.45714	1.23517e-19	2.33192e-17
MYH10	612.169	715.062	817.292	31.6406	47.7314	23.7515	-21.7666	-4.44405	1.37401e-19	2.55351e-17
LTBR	5.60338	3.51382	8.24358	184.091	132.587	332.521	34.9254	5.12621	2.07768e-19	3.80184e-17
PTPRF	11.2068	8.78455	7.06593	264.63	233.354	135.723	22.9899	4.52293	3.2484e-19	5.85402e-17
PLEKHB2	5.60338	5.27073	4.71062	244.495	265.175	105.185	37.6303	5.23382	3.54348e-19	6.29046e-17
OXA1L	4.20253	0	5.88827	149.574	143.194	285.018	49.3253	5.62426	3.66789e-19	6.41557e-17
PXDC1	4.20253	7.02764	5.88827	129.439	159.105	206.978	28.0164	4.8082	3.74087e-19	6.44839e-17
FEZ1	8.40507	7.02764	7.06593	146.697	127.284	217.157	21.4444	4.42253	3.93509e-19	6.68628e-17
DAP	16.8101	14.0553	18.8425	279.012	153.801	251.087	13.7203	3.77824	6.88161e-19	1.1368e-16
CAST	22.4135	19.326	12.9542	227.237	228.05	213.764	12.3305	3.62416	6.87436e-19	1.1368e-16
IGFBP3	6547.55	1419.58	1136.44	5.75283	0	0	-1198.37	-10.2269	9.89648e-19	1.61245e-16
NPC2	23.8144	12.2984	22.3754	258.877	281.085	749.869	21.5842	4.4319	1.05434e-18	1.69465e-16
PLAT	2.80169	1.75691	2.35531	279.012	143.194	213.764	83.4644	6.38309	1.15961e-18	1.83898e-16
FST	955.376	465.581	454.575	17.2585	0	3.39307	-75.0805	-6.23037	1.43882e-18	2.25175e-16
TNFRSF1A	28.0169	22.8398	20.0201	198.473	217.443	325.735	10.447	3.38502	1.46117e-18	2.25703e-16
ADM	5.60338	1.75691	3.53296	129.439	153.801	346.094	53.011	5.72822	1.77354e-18	2.70443e-16
VOPP1	5.60338	5.27073	3.53296	138.068	116.677	244.301	33.9228	5.08418	1.89745e-18	2.85674e-16
PPDPF	2.80169	5.27073	2.35531	181.214	100.766	491.996	71.8558	6.16703	2.63787e-18	3.92186e-16
RPL17	47.6287	63.2488	48.2838	782.385	625.812	2609.27	25.2073	4.65577	3.08261e-18	4.52648e-16
CST3	12.6076	7.02764	3.53296	201.349	127.284	620.933	40.1889	5.32873	3.6357e-18	5.27354e-16
JAM3	7.00422	14.0553	15.3095	140.944	217.443	227.336	15.5162	3.9557	4.25193e-18	6.09307e-16
TBC1D4	4.20253	1.75691	10.5989	189.843	339.423	122.151	35.1718	5.13635	4.97764e-18	7.04811e-16
TMEM123	4.20253	5.27073	8.24358	218.608	212.14	91.613	27.606	4.78691	5.4164e-18	7.57914e-16
OSGIN1	15.4093	8.78455	5.88827	537.89	185.622	156.081	28.8638	4.85119	5.56483e-18	7.69629e-16
EPHB2	0	3.51382	5.88827	120.809	169.712	213.764	47.5987	5.57285	8.42209e-18	1.15141e-15
HLA-A	39.2236	42.1658	37.6849	488.991	482.618	1757.61	22.8364	4.51326	9.71963e-18	1.3137e-15
GPR137B	654.194	405.846	418.067	25.8877	37.1244	20.3584	-18.2841	-4.19252	1.31404e-17	1.75608e-15
ATP5MC3	729.84	572.753	593.538	28.7642	42.4279	50.8961	-15.7911	-3.98104	2.37572e-17	3.13964e-15
TULP4	680.81	623.703	731.324	51.7755	42.4279	10.1792	-19.4117	-4.27885	2.43457e-17	3.18206e-15
TNFRSF10B	1.40084	0	1.17765	520.631	413.672	261.267	337.035	8.39675	2.97399e-17	3.81396e-15
TIMP1	5.60338	12.2984	16.4872	218.608	159.105	1007.74	39.3586	5.29861	2.98216e-17	3.81396e-15
BACE2	11.2068	15.8122	16.4872	169.709	206.836	139.116	11.3392	3.50325	3.63722e-17	4.60225e-15
NADSYN1	5.60338	14.0553	8.24358	109.304	153.801	247.694	18.3679	4.19911	3.70589e-17	4.63978e-15
ZMAT3	12.6076	17.5691	9.42124	161.079	249.264	132.33	13.552	3.76043	4.41624e-17	5.41513e-15
IGF2R	0	1.75691	1.17765	411.327	466.707	268.053	319.498	8.31966	4.3809e-17	5.41513e-15
GNG11	35.0211	43.9228	38.8626	270.383	556.867	967.026	15.1636	3.92254	4.57589e-17	5.55364e-15
VAMP3	21.0127	12.2984	10.5989	155.326	164.408	179.833	11.248	3.4916	4.73047e-17	5.68325e-15
GLB1	9.80591	10.5415	15.3095	120.809	175.015	186.619	12.7419	3.6715	4.9392e-17	5.87469e-15
NT5E	2.80169	0	2.35531	215.731	185.622	128.937	83.626	6.38588	6.0029e-17	7.06916e-15
SRXN1	60.2363	22.8398	36.5073	960.723	599.295	346.094	15.7744	3.97951	7.1747e-17	8.36626e-15
TUBA1B	3503.51	2995.53	3040.7	186.967	212.14	315.556	-13.3077	-3.73419	7.4797e-17	8.63724e-15
CERK	15.4093	14.0553	20.0201	221.484	159.105	186.619	11.3811	3.50857	7.62283e-17	8.71788e-15
RAC2	4.20253	5.27073	3.53296	238.743	58.3384	247.694	40.7566	5.34896	7.77034e-17	8.80194e-15
TMEM109	18.211	5.27073	3.53296	155.326	148.498	268.053	20.7609	4.3758	9.57586e-17	1.07448e-14
FLYWCH1	7.00422	3.51382	9.42124	175.461	116.677	128.937	19.9319	4.31701	9.69284e-17	1.07745e-14
SEC14L1	61.6372	65.0057	76.5476	868.678	1140.25	654.863	12.9252	3.69211	1.02438e-16	1.12815e-14
HEXB	11.2068	17.5691	20.0201	172.585	180.319	318.949	13.5756	3.76294	1.0364e-16	1.13091e-14
ARHGEF17	0	3.51382	4.71062	117.933	159.105	179.833	49.1904	5.62031	1.1185e-16	1.2094e-14
PALLD	403.443	319.758	334.454	23.0113	10.607	16.9654	-19.3303	-4.27279	1.32171e-16	1.41625e-14
IER3	8.40507	3.51382	3.53296	94.9217	143.194	257.874	30.5819	4.93461	1.36088e-16	1.4452e-14
CD55	1.40084	1.75691	0	279.012	445.493	288.411	279.302	8.12568	1.45678e-16	1.53336e-14
RPL39	12.6076	28.1106	47.1062	339.417	355.334	1075.6	19.9068	4.31519	1.66737e-16	1.73963e-14
TOLLIP	19.6118	15.8122	15.3095	192.72	153.801	261.267	12.0469	3.59059	2.11874e-16	2.19133e-14
CAD	550.532	507.747	542.899	48.8991	47.7314	30.5377	-12.6407	-3.66	2.17092e-16	2.22594e-14
PPP1R15A	30.8186	15.8122	27.0861	414.204	217.443	257.874	11.9013	3.57305	2.37345e-16	2.4128e-14
TTYH3	29.4177	43.9228	68.304	635.688	445.493	441.1	10.6171	3.40831	2.4944e-16	2.51427e-14
STOM	16.8101	17.5691	10.5989	138.068	169.712	162.868	10.4375	3.38371	2.64742e-16	2.64608e-14
RALA	39.2236	49.1935	42.3956	319.282	487.921	485.21	9.79057	3.29139	2.70463e-16	2.68074e-14
ADAMTS7	2.80169	0	1.17765	155.326	212.14	251.087	123.775	6.95158	2.89985e-16	2.85048e-14
FXYD5	2.80169	1.75691	2.35531	163.956	79.5524	366.452	79.2883	6.30904	3.76994e-16	3.67539e-14
GATD1	4.20253	0	2.35531	146.697	116.677	152.688	54.7879	5.77579	5.18416e-16	5.01304e-14
TFPI	2.80169	1.75691	7.06593	97.7981	201.533	128.937	31.5125	4.97785	5.69455e-16	5.46218e-14
TRAM2	36.422	29.8675	28.2637	316.406	684.15	230.729	12.8152	3.67978	8.20506e-16	7.80728e-14
RBBP7	713.03	535.858	499.326	48.8991	58.3384	40.7169	-12.0001	-3.58498	8.73441e-16	8.24501e-14
NNMT	2.80169	1.75691	3.53296	158.203	79.5524	169.654	45.7739	5.51645	1.08756e-15	1.01854e-13
STING1	9.80591	7.02764	5.88827	115.057	95.4628	278.232	21.1065	4.39961	1.15918e-15	1.07011e-13
SMC1A	428.658	500.719	512.28	31.6406	68.9454	23.7515	-12.7616	-3.67374	1.16062e-15	1.07011e-13
ABLIM3	4.20253	0	1.17765	169.709	111.373	152.688	70.7847	6.14537	1.26114e-15	1.15385e-13
MYDGF	16.8101	14.0553	15.3095	207.102	116.677	301.984	13.5036	3.75527	1.35657e-15	1.23169e-13
FHL2	11.2068	12.2984	20.0201	126.562	175.015	244.301	12.038	3.58952	1.38556e-15	1.24848e-13
SGSH	18.211	1.75691	10.5989	117.933	148.498	237.515	15.6	3.96347	1.70617e-15	1.5258e-13
UNC13B	11.2068	3.51382	4.71062	94.9217	201.533	149.295	21.3838	4.41845	1.76361e-15	1.5654e-13
RPS2	86.8524	119.47	136.608	1412.32	917.504	4166.69	18.9106	4.24112	1.86315e-15	1.6415e-13
PBXIP1	8.40507	12.2984	10.5989	86.2925	175.015	223.943	15.1552	3.92175	1.88148e-15	1.64546e-13
RRM1	434.262	411.117	421.6	25.8877	26.5175	50.8961	-12.0348	-3.58914	1.93231e-15	1.67758e-13
TSPAN18	4.20253	1.75691	5.88827	80.5396	137.891	176.44	29.5488	4.88503	2.42264e-15	2.08804e-13
KLHL21	12.6076	3.51382	7.06593	256.001	159.105	78.0407	20.3464	4.3467	2.4619e-15	2.09156e-13
CLCN7	33.6203	33.3813	41.2179	247.372	217.443	264.66	6.70315	2.74484	2.45072e-15	2.09156e-13
SLC7A11	43.4262	31.6244	49.4615	940.588	901.594	213.764	16.335	4.0299	2.62626e-15	2.21537e-13
MMP1	0	0	0	21181.9	13115.5	15146.7	65900.5	16.008	3.02055e-15	2.53003e-13
SLC3A2	72.8439	47.4366	68.304	880.183	403.065	648.077	10.2099	3.3519	3.0577e-15	2.54323e-13
ATP2B1	369.823	375.979	360.362	23.0113	47.7314	6.78615	-15.9097	-3.99184	4.21083e-15	3.47803e-13
JAG2	33.6203	19.326	25.9084	163.956	212.14	356.273	9.13932	3.19209	4.35847e-15	3.57515e-13
HLA-C	58.8355	43.9228	47.1062	316.406	535.653	1157.04	13.335	3.73714	4.52755e-15	3.68841e-13
CDC42EP3	9.80591	3.51382	7.06593	103.551	196.229	105.185	18.0758	4.17599	4.98687e-15	4.03496e-13
MCFD2	9.80591	21.0829	22.3754	376.81	275.782	101.792	13.9902	3.80635	5.62385e-15	4.48927e-13
TPM2	2.80169	3.51382	1.17765	103.551	79.5524	356.273	68.2519	6.0928	5.60407e-15	4.48927e-13
EDN1	8.40507	0	1.17765	69.034	408.369	145.902	59.0739	5.88445	7.85076e-15	6.22513e-13
ACKR3	416.051	421.658	532.3	5.75283	0	3.39307	-118.608	-6.89006	7.98494e-15	6.28959e-13
LAMA4	88.2532	73.7902	93.0347	730.61	1315.27	817.731	11.0623	3.46758	9.03034e-15	7.06624e-13
SPART	8.40507	8.78455	15.3095	192.72	233.354	78.0407	14.7592	3.88354	9.57564e-15	7.44397e-13
PHLDB1	11.2068	29.8675	30.619	218.608	196.229	247.694	9.26863	3.21236	1.00006e-14	7.72385e-13
MXD4	28.0169	14.0553	24.7307	169.709	185.622	315.556	9.79692	3.29233	1.07772e-14	8.2699e-13
NDRG1	39.2236	29.8675	10.5989	428.586	249.264	305.377	12.4983	3.64366	1.16091e-14	8.85123e-13
DNAJA2	514.11	539.371	557.031	66.1576	42.4279	40.7169	-10.3466	-3.37108	1.31243e-14	9.94267e-13
IFI16	0	1.75691	1.17765	235.866	206.836	183.226	177.361	7.47054	1.41281e-14	1.06354e-12
AZIN1	501.502	483.15	441.62	51.7755	53.0349	10.1792	-12.6089	-3.65637	1.47318e-14	1.10201e-12
MAFF	25.2152	7.02764	7.06593	138.068	169.712	173.047	11.886	3.5712	1.4986e-14	1.11402e-12
NAA15	309.587	388.277	317.967	20.1349	47.7314	10.1792	-14.5074	-3.85872	1.53064e-14	1.13077e-12
MMP2	0	0	1.17765	362.428	509.135	627.719	695.28	9.44145	1.79347e-14	1.31676e-12
MT2A	0	0	2.35531	417.08	68.9454	424.134	265.963	8.05508	1.99018e-14	1.45222e-12
PARP4	15.4093	14.0553	16.4872	172.585	180.319	101.792	9.56145	3.25723	2.00695e-14	1.45553e-12
PLOD1	1.40084	0	0	468.856	355.334	587.002	659.66	9.36558	2.17807e-14	1.5606e-12
ATP1B3	60.2363	49.1935	27.0861	302.024	434.886	495.389	9.05369	3.17851	2.17084e-14	1.5606e-12
RPS27L	26.616	35.1382	32.9743	218.608	164.408	349.487	7.79513	2.96257	2.40689e-14	1.71422e-12
AKAP12	40.6245	21.0829	23.5531	906.071	493.225	132.33	17.8052	4.15423	2.72058e-14	1.92611e-12
DIPK1B	8.40507	0	4.71062	80.5396	95.4628	369.845	38.3125	5.25974	2.80066e-14	1.97107e-12
ADGRA2	302.582	328.542	387.448	5.75283	10.607	0	-67.1511	-6.06934	3.03699e-14	2.12482e-12
FAM234A	2.80169	3.51382	2.35531	80.5396	95.4628	210.371	42.0899	5.3954	3.14561e-14	2.18795e-12
PODXL	77.0464	70.2764	75.3699	952.094	535.653	553.071	9.18452	3.1992	3.29827e-14	2.28079e-12
RPS29	22.4135	7.02764	14.1319	161.079	116.677	573.429	19.1102	4.25627	3.73609e-14	2.56862e-12
ESD	1085.65	897.781	1025.74	80.5396	58.3384	115.365	-11.4394	-3.51594	3.8324e-14	2.61969e-12
TNS1	644.388	442.741	482.838	54.6519	58.3384	47.503	-9.83478	-3.29789	4.32118e-14	2.90373e-12
FOXP1	376.827	318.001	303.835	37.3934	31.8209	23.7515	-10.556	-3.4	4.30983e-14	2.90373e-12
SH3PXD2B	8.40507	7.02764	5.88827	138.068	175.015	67.8615	17.1305	4.0985	4.29016e-14	2.90373e-12
MEIS2	382.431	295.161	252.018	5.75283	31.8209	20.3584	-17.8334	-4.15651	4.39167e-14	2.93452e-12
PVR	1.40084	0	1.17765	350.923	190.926	132.33	191.583	7.58183	4.45418e-14	2.95967e-12
FARSB	353.013	252.995	277.926	20.1349	0	23.7515	-17.3873	-4.11996	4.75088e-14	3.13928e-12
DAPK3	19.6118	17.5691	15.3095	129.439	121.98	223.943	9.08586	3.18362	5.2918e-14	3.47738e-12
COTL1	0	1.75691	2.35531	161.079	63.6419	288.411	104.92	6.71314	5.4492e-14	3.56114e-12
PLEKHM1	28.0169	31.6244	24.7307	244.495	254.568	152.688	7.687	2.94242	5.79431e-14	3.76599e-12
S100A16	54.6329	17.5691	36.5073	342.293	270.478	909.344	13.8546	3.79229	5.97293e-14	3.84011e-12
CUL3	641.587	729.118	701.882	69.034	95.4628	33.9307	-10.9679	-3.45522	5.96325e-14	3.84011e-12
PLEKHO1	4.20253	14.0553	9.42124	138.068	84.8559	413.955	22.8426	4.51366	6.29569e-14	4.02586e-12
NEDD4	630.38	676.41	691.283	51.7755	100.766	16.9654	-13.1087	-3.71245	7.33099e-14	4.66282e-12
PHGDH	240.945	347.868	403.936	5.75283	10.607	0	-65.0065	-6.02251	7.40614e-14	4.68556e-12
HMGA2	148.49	509.504	704.237	31.6406	5.30349	6.78615	-28.8503	-4.85051	7.8572e-14	4.94463e-12
KIAA1671	4.20253	8.78455	7.06593	163.956	159.105	61.0753	18.6353	4.21997	7.96822e-14	4.98811e-12
JTB	0	5.27073	1.17765	120.809	63.6419	301.984	73.7913	6.20538	8.31677e-14	5.17904e-12
DEPP1	0	1.75691	2.35531	11.5057	360.637	953.454	270.979	8.08204	8.94294e-14	5.53996e-12
AXL	9.80591	5.27073	5.88827	175.461	79.5524	95.0061	16.4529	4.04027	9.06752e-14	5.58804e-12
GOLGA3	18.211	21.0829	18.8425	253.125	169.712	118.758	9.34137	3.22363	1.00749e-13	6.17683e-12
HNRNPA3	1399.44	1944.9	1839.5	195.596	164.408	108.578	-11.0099	-3.46073	1.04001e-13	6.34355e-12
KXD1	2.80169	3.51382	5.88827	94.9217	84.8559	145.902	24.7619	4.63005	1.06936e-13	6.48924e-12
ITGA2	7.00422	7.02764	9.42124	480.361	185.622	40.7169	29.1623	4.86603	1.18477e-13	7.15315e-12
FABP5	2.80169	1.75691	5.88827	48.8991	143.194	274.839	40.1276	5.32652	1.28931e-13	7.74496e-12
AKR1A1	574.346	500.719	574.695	60.4047	21.214	71.2546	-9.96583	-3.31699	1.29908e-13	7.76445e-12
ABCA1	274.566	216.1	221.399	2.87642	26.5175	6.78615	-23.9784	-4.58366	1.33112e-13	7.87678e-12
SRPX2	2.80169	7.02764	3.53296	83.4161	95.4628	156.081	24.9852	4.643	1.33e-13	7.87678e-12
CDH11	228.338	267.05	292.058	5.75283	5.30349	6.78615	-41.9615	-5.39099	1.36193e-13	8.01922e-12
R3HDM1	207.325	286.376	241.419	11.5057	10.607	20.3584	-16.6015	-4.05324	1.45449e-13	8.52205e-12
C1orf43	29.4177	43.9228	40.0403	238.743	180.319	240.908	5.98857	2.58221	1.48424e-13	8.6537e-12
ATP2B4	2.80169	0	0	201.349	302.299	98.3991	167.419	7.38732	1.60757e-13	9.32706e-12
TMPO	177.907	295.161	276.749	14.3821	15.9105	10.1792	-18.4869	-4.20843	1.78868e-13	1.03275e-11
DDB2	0	7.02764	1.17765	74.7868	95.4628	244.301	50.9737	5.67168	1.81825e-13	1.04474e-11
ABCC5	413.249	340.841	378.027	51.7755	37.1244	23.7515	-9.79323	-3.29178	1.84847e-13	1.05701e-11
SEMA4C	194.717	351.382	343.875	0	5.30349	13.5723	-46.9512	-5.55309	1.91658e-13	1.09071e-11
GUCD1	15.4093	5.27073	7.06593	132.315	90.1594	118.758	12.2626	3.61619	1.95182e-13	1.10548e-11
ANAPC1	379.629	423.415	398.047	54.6519	42.4279	23.7515	-9.69748	-3.27761	2.02435e-13	1.13663e-11
CTNNB1	4140.9	2447.38	2417.72	253.125	397.762	220.55	-10.452	-3.38571	2.02595e-13	1.13663e-11
TNS2	509.907	368.951	422.778	17.2585	58.3384	54.2892	-10.7047	-3.42017	2.09319e-13	1.16885e-11
MON1B	11.2068	14.0553	4.71062	161.079	106.07	95.0061	12.6412	3.66006	2.27417e-13	1.26397e-11
IL6ST	21.0127	26.3537	27.0861	793.891	678.847	67.8615	20.487	4.35664	2.86023e-13	1.58231e-11
ACSL5	198.92	219.614	184.892	2.87642	15.9105	10.1792	-22.9499	-4.52042	3.02094e-13	1.66347e-11
MCM3	378.228	221.371	268.505	20.1349	10.607	27.1446	-14.1103	-3.81868	3.30763e-13	1.81295e-11
MXRA7	1.40084	0	0	353.799	291.692	386.81	488.313	8.93166	3.37636e-13	1.84213e-11
SSH1	14.0084	22.8398	20.0201	195.596	296.996	111.971	10.4086	3.37971	3.44024e-13	1.86841e-11
COMT	9.80591	19.326	9.42124	106.427	116.677	217.157	11.6549	3.54287	3.67432e-13	1.98647e-11
LOXL2	1.40084	0	0	465.979	328.816	261.267	492.002	8.94252	4.03343e-13	2.17075e-11
REPIN1	0	5.27073	8.24358	117.933	90.1594	91.613	20.7501	4.37504	4.06852e-13	2.17978e-11
MT-CO1	1136.08	716.819	663.02	8856.48	8761.37	6151.64	9.44343	3.23931	4.27937e-13	2.28246e-11
TSPAN17	12.6076	7.02764	11.7765	117.933	90.1594	118.758	10.1596	3.34477	5.09157e-13	2.68708e-11
AHR	4.20253	0	3.53296	149.574	217.443	40.7169	45.3385	5.50266	5.10577e-13	2.68708e-11
TOP2A	386.633	535.858	557.031	2.87642	5.30349	0	-184.724	-7.52923	5.06385e-13	2.68708e-11
ST3GAL1	0	8.78455	3.53296	152.45	132.587	61.0753	28.2324	4.81928	5.13816e-13	2.69221e-11
IFITM3	0	0	1.17765	247.372	185.622	892.378	627.427	9.2933	5.21837e-13	2.72225e-11
GNG12	0	7.02764	1.17765	189.843	153.801	47.503	47.8307	5.57987	5.31192e-13	2.75895e-11
TBC1D8	18.211	14.0553	9.42124	123.686	206.836	108.578	10.202	3.35078	5.41147e-13	2.79844e-11
MOB3A	0	1.75691	3.53296	92.0453	84.8559	118.758	47.0983	5.5576	5.56685e-13	2.86632e-11
LYN	18.211	19.326	28.2637	126.562	265.175	206.978	8.69532	3.12024	6.11797e-13	3.13651e-11
RAPGEF5	224.135	216.1	190.78	20.1349	21.214	20.3584	-10.0955	-3.33565	7.49288e-13	3.82491e-11
SEPTIN7	832.102	806.422	773.719	89.1689	106.07	50.8961	-10.0732	-3.33245	7.56128e-13	3.84333e-11
MECOM	292.777	265.293	237.886	28.7642	21.214	10.1792	-12.7712	-3.67482	7.81847e-13	3.94037e-11
ITGB4	275.966	254.752	319.144	8.62925	31.8209	30.5377	-13.0069	-3.7012	7.80147e-13	3.94037e-11
NT5DC2	8.40507	8.78455	12.9542	106.427	79.5524	237.515	13.6911	3.77516	8.40164e-13	4.21642e-11
HYAL2	75.6456	65.0057	81.2582	402.698	461.404	780.407	7.36914	2.8815	9.34208e-13	4.66868e-11
SORBS1	221.333	187.989	206.09	11.5057	5.30349	0	-32.8943	-5.03977	9.53637e-13	4.74584e-11
CNBP	1966.79	1468.78	1508.58	155.326	159.105	206.978	-9.43724	-3.23836	1.05051e-12	5.20613e-11
ANAPC4	219.933	226.641	226.11	20.1349	37.1244	10.1792	-10.8274	-3.43662	1.07218e-12	5.2915e-11
ARFGEF1	483.291	481.393	451.042	48.8991	95.4628	27.1446	-9.04018	-3.17635	1.14231e-12	5.61432e-11
SH3BP4	19.6118	21.0829	30.619	192.72	307.602	135.723	8.56794	3.09895	1.15675e-12	5.66191e-11
TP53I11	1.40084	1.75691	1.17765	51.7755	159.105	213.764	84.7287	6.40478	1.23001e-12	5.9958e-11
SMC4	145.688	237.183	203.734	20.1349	10.607	3.39307	-15.9778	-3.998	1.2767e-12	6.19798e-11
PINK1	9.80591	8.78455	9.42124	74.7868	106.07	213.764	13.7373	3.78003	1.28654e-12	6.22035e-11
PGPEP1	8.40507	8.78455	5.88827	86.2925	121.98	108.578	13.2347	3.72625	1.3613e-12	6.55519e-11
MBD1	15.4093	12.2984	7.06593	189.843	95.4628	95.0061	11.126	3.47587	1.38038e-12	6.62027e-11
NR4A1	339.004	147.58	173.115	11.5057	10.607	6.78615	-22.3097	-4.4796	1.46297e-12	6.98819e-11
ENG	130.279	108.928	163.694	940.588	1044.79	1727.07	9.16255	3.19575	1.50506e-12	7.16049e-11
SH3TC1	14.0084	24.5967	29.4414	152.45	169.712	200.191	7.47571	2.90221	1.51766e-12	7.19163e-11
FBXO7	0	5.27073	4.71062	92.0453	53.0349	128.937	26.5676	4.7316	1.52761e-12	7.21009e-11
DARS1	267.561	254.752	236.709	23.0113	26.5175	16.9654	-11.5073	-3.52448	1.56191e-12	7.34284e-11
ABCF2-H2BE1	298.38	277.592	269.683	37.3934	15.9105	13.5723	-11.5864	-3.53436	1.65204e-12	7.73599e-11
CNOT6	197.519	296.918	246.13	20.1349	15.9105	23.7515	-11.8987	-3.57274	1.69636e-12	7.91238e-11
UBE2H	37.8228	42.1658	49.4615	304.9	472.011	247.694	7.70865	2.94648	1.72644e-12	8.00063e-11
UTP20	224.135	245.967	231.998	23.0113	31.8209	13.5723	-10.6467	-3.41233	1.73294e-12	8.00063e-11
MT-CO2	0	0	0	3316.51	4762.54	7386.72	20608.8	14.331	1.73547e-12	8.00063e-11
DPP7	11.2068	0	5.88827	89.1689	74.2489	291.804	24.9449	4.64067	1.74404e-12	8.0091e-11
ROCK2	739.646	767.77	905.616	77.6632	121.98	33.9307	-10.964	-3.4547	1.77851e-12	8.136e-11
TRIM25	43.4262	50.9504	50.6391	325.035	328.816	312.163	6.62361	2.72762	1.80742e-12	8.23658e-11
OS9	53.2321	52.7073	58.8827	362.428	281.085	475.03	6.82407	2.77063	1.85839e-12	8.43654e-11
HPRT1	250.751	205.558	200.201	5.75283	5.30349	3.39307	-43.1615	-5.43167	2.01839e-12	9.12803e-11
CMTM7	4.20253	1.75691	5.88827	69.034	68.9454	166.261	23.2946	4.54193	2.16715e-12	9.76368e-11
TRIB3	0	0	2.35531	486.114	84.8559	98.3991	196.902	7.62133	2.21727e-12	9.95176e-11
TTL	11.2068	8.78455	15.3095	129.439	148.498	84.8268	9.55513	3.25628	2.4172e-12	1.08083e-10
GNPTG	7.00422	8.78455	4.71062	69.034	79.5524	227.336	18.1952	4.18549	2.54474e-12	1.1336e-10
MYLK	218.532	207.315	199.024	23.0113	37.1244	6.78615	-10.0401	-3.3277	2.56259e-12	1.13729e-10
TBC1D2B	12.6076	8.78455	18.8425	94.9217	164.408	149.295	9.35891	3.22634	2.64324e-12	1.16872e-10
ARHGEF3	2.80169	0	2.35531	54.6519	169.712	108.578	51.7677	5.69398	2.74734e-12	1.20734e-10
AP5Z1	2.80169	0	4.71062	89.1689	68.9454	81.4338	26.7856	4.74338	2.75087e-12	1.20734e-10
DCTD	4.20253	1.75691	2.35531	117.933	47.7314	95.0061	29.629	4.88894	2.79345e-12	1.22152e-10
STRN3	256.355	182.719	164.872	20.1349	26.5175	3.39307	-12.6034	-3.65575	2.80924e-12	1.22392e-10
MYEF2	204.523	291.647	261.439	17.2585	37.1244	6.78615	-13.6679	-3.77271	2.94685e-12	1.27919e-10
PURB	390.836	330.299	317.967	48.8991	53.0349	27.1446	-8.16952	-3.03025	2.98358e-12	1.29043e-10
EIF4E	180.709	195.017	167.227	17.2585	15.9105	13.5723	-11.2924	-3.49728	3.04697e-12	1.31307e-10
MTUS1	11.2068	17.5691	16.4872	80.5396	254.568	139.116	10.1293	3.34047	3.36852e-12	1.4464e-10
NRARP	173.705	233.669	276.749	11.5057	26.5175	27.1446	-10.9433	-3.45198	3.55291e-12	1.52008e-10
SARAF	35.0211	24.5967	24.7307	247.372	212.14	145.902	7.12998	2.8339	3.60155e-12	1.53537e-10
FAM102A	5.60338	3.51382	7.06593	126.562	53.0349	81.4338	15.5158	3.95567	3.67121e-12	1.55948e-10
LRPAP1	18.211	26.3537	10.5989	163.956	106.07	366.452	11.6829	3.54633	3.75902e-12	1.5911e-10
TSPAN15	4.20253	5.27073	0	43.1462	127.284	142.509	32.6321	5.02822	4.3407e-12	1.83079e-10
TAF1D	5.60338	7.02764	8.24358	69.034	116.677	128.937	14.1624	3.824	4.48949e-12	1.88685e-10
ZNF148	229.739	261.78	246.13	11.5057	47.7314	3.39307	-14.3189	-3.83985	4.6054e-12	1.92875e-10
MGST1	7.00422	7.02764	10.5989	100.675	68.9454	101.792	10.8233	3.43607	4.72004e-12	1.96983e-10
CHD1	166.7	200.288	204.912	28.7642	21.214	6.78615	-9.79179	-3.29157	5.1442e-12	2.13934e-10
CHUK	221.333	221.371	217.866	20.1349	42.4279	16.9654	-9.04756	-3.17753	5.18271e-12	2.14785e-10
EMCN	22.4135	19.326	15.3095	77.6632	243.961	203.584	9.00847	3.17128	5.97932e-12	2.46798e-10
PPP3CA	303.983	332.056	250.84	40.2698	31.8209	13.5723	-10.1051	-3.33701	5.99668e-12	2.46798e-10
SRP54	400.642	423.415	443.976	63.2811	74.2489	27.1446	-7.96347	-2.9934	6.07828e-12	2.49293e-10
NUP205	257.755	252.995	276.749	31.6406	31.8209	20.3584	-9.4504	-3.24038	6.12898e-12	2.50509e-10
RNF130	284.371	230.155	206.09	23.0113	31.8209	20.3584	-9.84465	-3.29934	6.92529e-12	2.82087e-10
SLC17A5	1.40084	1.75691	5.88827	109.304	90.1594	57.6823	24.5854	4.61973	7.14828e-12	2.90176e-10
ACSL4	365.62	310.973	296.769	43.1462	53.0349	16.9654	-8.91105	-3.1556	7.49734e-12	3.03311e-10
SYNJ2	23.8144	28.1106	27.0861	235.866	222.747	125.544	7.31759	2.87137	7.58015e-12	3.05621e-10
GUK1	15.4093	10.5415	2.35531	155.326	53.0349	451.279	23.0807	4.52862	7.73127e-12	3.07544e-10
PAICS	212.928	172.177	208.445	20.1349	21.214	30.5377	-8.23012	-3.04091	7.66546e-12	3.07544e-10
WDR36	296.979	231.912	199.024	34.517	10.607	3.39307	-13.4719	-3.75188	7.69248e-12	3.07544e-10
RHOJ	29.4177	8.78455	29.4414	158.203	217.443	223.943	8.32879	3.05811	7.7165e-12	3.07544e-10
CD276	0	0	1.17765	316.406	143.194	268.053	343.58	8.4245	7.78378e-12	3.08601e-10
RSL1D1	9.80591	8.78455	8.24358	74.7868	84.8559	98.3991	9.35716	3.22607	8.27655e-12	3.27047e-10
UBXN6	7.00422	14.0553	3.53296	106.427	58.3384	274.839	18.0989	4.17783	8.48076e-12	3.34007e-10
CNRIP1	1.40084	10.5415	7.06593	224.36	42.4279	115.365	19.9931	4.32143	8.6628e-12	3.38932e-10
CCPG1	8.40507	10.5415	10.5989	198.473	265.175	33.9307	16.3531	4.03149	8.63916e-12	3.38932e-10
COX7A2	8.40507	10.5415	5.88827	77.6632	84.8559	125.544	11.728	3.55188	9.15351e-12	3.56957e-10
TOMM70	420.253	462.067	411.001	69.034	68.9454	20.3584	-8.24282	-3.04314	9.27513e-12	3.59343e-10
BMX	4.20253	1.75691	2.35531	48.8991	185.622	74.6476	32.9846	5.04372	9.26716e-12	3.59343e-10
GRN	110.667	94.8731	146.029	647.194	864.469	1856.01	9.54027	3.25403	9.38877e-12	3.62565e-10
LHFPL2	4.20253	5.27073	1.17765	66.1576	116.677	61.0753	21.8632	4.45043	9.51756e-12	3.66349e-10
FMR1	194.717	242.454	235.531	28.7642	37.1244	10.1792	-9.20314	-3.20213	9.77826e-12	3.7517e-10
SP100	0	1.75691	0	204.226	233.354	251.087	316.807	8.30746	9.9763e-12	3.81537e-10
TXNIP	135.882	231.912	228.465	8.62925	5.30349	30.5377	-12.5748	-3.65247	1.03856e-11	3.95916e-10
HSPG2	266.16	435.714	518.168	5338.63	8018.88	1516.7	12.1793	3.60636	1.0522e-11	3.99836e-10
RSRP1	11.2068	7.02764	7.06593	89.1689	153.801	84.8268	12.0303	3.5886	1.07899e-11	4.08709e-10
MLEC	18.211	15.8122	27.0861	232.99	111.373	125.544	7.61555	2.92895	1.16501e-11	4.39894e-10
NDUFA11	9.80591	10.5415	8.24358	92.0453	63.6419	213.764	12.8771	3.68673	1.17722e-11	4.41698e-10
IER2	5.60338	0	7.06593	54.6519	153.801	81.4338	19.6567	4.29695	1.1736e-11	4.41698e-10
RNH1	32.2194	21.0829	34.152	293.394	106.07	454.672	9.69981	3.27796	1.18218e-11	4.42165e-10
MYL12A	53.2321	42.1658	40.0403	244.495	249.264	325.735	6.06361	2.60018	1.22319e-11	4.56069e-10
PARP14	2.80169	10.5415	8.24358	80.5396	143.194	71.2546	12.9895	3.69927	1.2407e-11	4.61151e-10
LRRK1	186.312	170.42	179.004	20.1349	31.8209	10.1792	-9.18748	-3.19967	1.28637e-11	4.76638e-10
RPL6	107.865	103.658	88.3241	693.216	567.474	1791.54	10.1816	3.34789	1.30486e-11	4.81988e-10
CARD6	1.40084	1.75691	2.35531	100.675	79.5524	57.6823	37.9073	5.2444	1.31063e-11	4.82621e-10
HNRNPF	851.713	964.544	919.748	109.304	100.766	118.758	-8.20288	-3.03613	1.3178e-11	4.83764e-10
GBE1	26.616	36.8951	14.1319	224.36	323.513	118.758	8.59415	3.10335	1.3224e-11	4.83956e-10
CYB561	14.0084	14.0553	4.71062	106.427	100.766	108.578	10.04	3.32769	1.34335e-11	4.90117e-10
CYB561A3	4.20253	3.51382	2.35531	60.4047	63.6419	88.2199	20.1702	4.33415	1.35988e-11	4.9463e-10
HNRNPH1	1116.47	1050.63	1107	106.427	185.622	118.758	-8.46195	-3.08099	1.37656e-11	4.97655e-10
TBC1D16	4.20253	8.78455	12.9542	106.427	121.98	88.2199	11.3327	3.50242	1.37474e-11	4.97655e-10
AHRR	4.20253	3.51382	0	115.057	74.2489	61.0753	32.6592	5.02942	1.39615e-11	5.03207e-10
PGK1	2807.29	1739.34	1977.28	342.293	212.14	213.764	-8.39052	-3.06876	1.61718e-11	5.81109e-10
DFFA	1.40084	1.75691	3.53296	74.7868	90.1594	57.6823	27.9372	4.80411	1.82445e-11	6.51708e-10
HNRNPU	1864.52	2301.55	2230.48	322.159	281.085	200.191	-7.93576	-2.98837	1.82461e-11	6.51708e-10
SMC2	159.696	191.503	169.582	0	21.214	13.5723	-17.4373	-4.12411	1.84226e-11	6.54086e-10
SLC38A10	30.8186	35.1382	51.8168	224.36	164.408	332.521	6.094	2.60739	1.84021e-11	6.54086e-10
ISY1-RAB43	5.60338	0	0	71.9104	68.9454	101.792	38.6076	5.27081	1.86101e-11	6.58776e-10
FBLN5	1532.52	699.25	582.939	0	5.30349	0	-627.662	-9.29384	1.87511e-11	6.61797e-10
COX7C	12.6076	7.02764	5.88827	74.7868	74.2489	251.087	15.3789	3.94288	1.89819e-11	6.6599e-10
TOR4A	2.80169	0	3.53296	66.1576	58.3384	91.613	28.3868	4.82715	1.89359e-11	6.6599e-10
SRSF1	802.684	913.593	818.47	135.192	68.9454	71.2546	-8.63944	-3.11094	1.91295e-11	6.69196e-10
CPT1A	53.2321	45.6797	36.5073	330.788	302.299	210.371	6.24434	2.64255	1.9923e-11	6.9491e-10
SLFN5	2.80169	8.78455	4.71062	195.596	111.373	37.3238	20.875	4.3837	2.07344e-11	7.21095e-10
EGFL7	58.8355	52.7073	73.0146	330.788	355.334	1564.21	12.1415	3.60188	2.09769e-11	7.27402e-10
TCERG1	210.127	210.829	213.155	34.517	26.5175	20.3584	-7.57993	-2.92218	2.18298e-11	7.54777e-10
ATP6V0E1	42.0253	54.4642	40.0403	195.596	201.533	301.984	5.20132	2.37888	2.37942e-11	8.20312e-10
UQCRQ	1.40084	1.75691	3.53296	86.2925	37.1244	193.405	41.8882	5.38847	2.49166e-11	8.56527e-10
MAVS	0	1.75691	0	169.709	238.657	203.584	275.202	8.10435	2.60631e-11	8.93356e-10
FAM107B	18.211	14.0553	7.06593	152.45	132.587	78.0407	9.28287	3.21457	2.65028e-11	9.05819e-10
CRELD2	9.80591	3.51382	11.7765	224.36	47.7314	118.758	14.9764	3.90462	2.72767e-11	9.29596e-10
MYCT1	44.827	31.6244	37.6849	230.113	217.443	166.261	5.2921	2.40384	2.82521e-11	9.60086e-10
CD59	0	0	0	2111.29	2932.83	3562.73	11463.9	13.4848	2.88018e-11	9.75977e-10
HNRNPAB	986.195	887.24	926.814	132.315	90.1594	118.758	-7.92196	-2.98586	2.97344e-11	1.00472e-09
VEGFB	16.8101	17.5691	15.3095	115.057	84.8559	346.094	10.9455	3.45226	3.22661e-11	1.08717e-09
DNASE2	1.40084	0	2.35531	103.551	42.4279	169.654	65.6667	6.03709	3.28288e-11	1.10301e-09
SLC6A6	39.2236	22.8398	29.4414	327.911	376.548	98.3991	8.636	3.11036	3.31333e-11	1.11011e-09
SERPINB1	2.80169	3.51382	5.88827	48.8991	84.8559	118.758	18.8385	4.23561	3.32662e-11	1.11143e-09
ZC3HAV1	4.20253	14.0553	9.42124	89.1689	100.766	78.0407	9.6192	3.26592	3.34813e-11	1.11548e-09
TMEM127	23.8144	29.8675	29.4414	143.821	159.105	145.902	5.31282	2.40948	3.45717e-11	1.14859e-09
UBQLN2	194.717	165.15	183.714	28.7642	0	0	-14.8585	-3.89322	3.54481e-11	1.17443e-09
UBE2N	343.207	270.564	268.505	40.2698	42.4279	27.1446	-8.0942	-3.01689	3.56028e-11	1.17628e-09
MCM2	214.329	161.636	133.075	8.62925	10.607	10.1792	-17.1327	-4.09868	3.67364e-11	1.21037e-09
JADE1	341.806	203.802	173.115	17.2585	21.214	30.5377	-10.334	-3.36933	3.72368e-11	1.22346e-09
ANKRD17	1004.41	920.621	964.499	126.562	100.766	13.5723	-11.9863	-3.58331	3.75401e-11	1.23003e-09
ARID2	191.916	189.746	138.963	5.75283	21.214	0	-22.9528	-4.5206	3.77842e-11	1.23463e-09
SH2B3	43.4262	42.1658	47.1062	333.664	302.299	190.012	6.16012	2.62296	3.80913e-11	1.24125e-09
PREX2	193.317	230.155	208.445	8.62925	58.3384	6.78615	-10.7264	-3.42309	4.04313e-11	1.31391e-09
MCM5	294.177	319.758	267.328	17.2585	21.214	54.2892	-9.22693	-3.20585	4.15711e-11	1.34727e-09
RBM25	306.785	344.354	329.743	51.7755	58.3384	37.3238	-6.74174	-2.75312	4.17642e-11	1.34985e-09
NCOA4	15.4093	31.6244	22.3754	195.596	265.175	101.792	8.02981	3.00537	4.27597e-11	1.37828e-09
HOMER3	39.2236	22.8398	28.2637	149.574	206.836	644.684	10.99	3.45812	4.43145e-11	1.42453e-09
MLXIP	12.6076	29.8675	28.2637	178.338	111.373	162.868	6.56629	2.71508	4.63147e-11	1.48083e-09
COPRS	5.60338	3.51382	2.35531	77.6632	37.1244	105.185	18.9897	4.24715	4.62204e-11	1.48083e-09
GLA	8.40507	7.02764	11.7765	106.427	58.3384	115.365	10.2652	3.35969	5.24235e-11	1.67165e-09
MAP4K3	175.106	193.26	157.806	20.1349	26.5175	3.39307	-10.91	-3.44758	5.29922e-11	1.68285e-09
TNRC6C	152.692	182.719	188.425	20.1349	21.214	16.9654	-8.97306	-3.1656	5.30577e-11	1.68285e-09
CABLES1	1.40084	5.27073	7.06593	46.0227	111.373	108.578	17.761	4.15064	5.50333e-11	1.73625e-09
PLXNA3	12.6076	8.78455	18.8425	123.686	132.587	84.8268	7.83935	2.97073	5.49544e-11	1.73625e-09
XRCC5	44.827	47.4366	52.9945	253.125	302.299	312.163	5.83066	2.54366	5.61509e-11	1.76682e-09
JCAD	12.6076	19.326	21.1978	77.6632	328.816	139.116	9.96351	3.31665	5.7479e-11	1.80229e-09
BET1L	2.80169	3.51382	5.88827	115.057	42.4279	74.6476	18.1581	4.18254	5.75812e-11	1.80229e-09
GPX3	1.40084	0	0	106.427	164.408	349.487	287.816	8.169	5.83702e-11	1.82219e-09
MYO1B	222.734	326.785	327.388	28.7642	26.5175	47.503	-8.3293	-3.0582	5.99472e-11	1.86652e-09
TNIP2	4.20253	0	1.17765	46.0227	95.4628	101.792	37.6138	5.23319	6.34183e-11	1.96801e-09
NUDT5	1.40084	3.51382	7.06593	51.7755	63.6419	98.3991	16.0878	4.00789	6.35376e-11	1.96801e-09
TAPBP	30.8186	24.5967	23.5531	115.057	169.712	237.515	6.5347	2.70812	6.39181e-11	1.96954e-09
FUS	1082.85	823.991	837.312	123.686	90.1594	128.937	-7.80042	-2.96355	6.38688e-11	1.96954e-09
MCM6	292.777	202.045	138.963	2.87642	0	6.78615	-54.8748	-5.77807	6.60973e-11	2.03142e-09
CCDC88A	256.355	231.912	261.439	28.7642	47.7314	10.1792	-9.41433	-3.23486	6.70876e-11	2.05655e-09
NDUFA4	2.80169	3.51382	4.71062	51.7755	58.3384	139.116	21.0913	4.39858	6.76405e-11	2.06816e-09
TAX1BP3	30.8186	42.1658	48.2838	221.484	212.14	495.389	7.63881	2.93335	6.9277e-11	2.11277e-09
ELK3	305.384	303.945	315.611	43.1462	53.0349	37.3238	-7.09204	-2.8262	7.06809e-11	2.15007e-09
PUM3	158.295	170.42	173.115	2.87642	26.5175	16.9654	-12.4133	-3.63381	7.14196e-11	2.167e-09
HTATIP2	39.2236	35.1382	25.9084	149.574	180.319	295.197	6.25821	2.64575	7.24797e-11	2.19357e-09
TMEM50A	11.2068	3.51382	4.71062	71.9104	79.5524	88.2199	11.6934	3.54762	7.45065e-11	2.2435e-09
INKA2	15.4093	7.02764	2.35531	89.1689	90.1594	81.4338	10.5665	3.40142	7.44195e-11	2.2435e-09
RARS1	323.595	391.791	386.271	48.8991	58.3384	64.4684	-6.45595	-2.69063	7.88941e-11	2.36961e-09
METAP2	382.431	451.526	400.403	80.5396	53.0349	47.503	-6.51195	-2.70309	8.07971e-11	2.42066e-09
CTPS1	210.127	182.719	169.582	28.7642	15.9105	30.5377	-6.99886	-2.80712	8.63728e-11	2.5812e-09
CAPN1	57.4346	38.652	54.1721	385.44	201.533	407.169	6.62782	2.72853	8.92883e-11	2.66164e-09
DDR2	0	1.75691	4.71062	198.473	116.677	23.7515	45.3511	5.50307	9.04634e-11	2.68856e-09
LRRC75A	0	0	1.17765	149.574	90.1594	413.955	309.5	8.27379	9.06436e-11	2.68856e-09
NPR1	140.084	184.476	193.135	5.75283	5.30349	3.39307	-34.0809	-5.09089	9.15759e-11	2.70946e-09
CNP	21.0127	19.326	30.619	115.057	132.587	179.833	5.81581	2.53998	9.36783e-11	2.76479e-09
BSDC1	19.6118	14.0553	12.9542	117.933	90.1594	105.185	6.82213	2.77022	9.44977e-11	2.78207e-09
ECM1	231.139	119.47	189.602	8.62925	0	27.1446	-13.5972	-3.76524	9.53152e-11	2.79921e-09
HS1BP3	4.20253	10.5415	2.35531	83.4161	47.7314	78.0407	13.6037	3.76593	9.77567e-11	2.86384e-09
SMARCA5	539.325	535.858	508.747	71.9104	121.98	57.6823	-6.70623	-2.7455	9.80679e-11	2.8659e-09
NIPBL	346.009	409.36	405.113	48.8991	95.4628	33.9307	-7.08651	-2.82508	9.91732e-11	2.89109e-09
METRNL	12.6076	7.02764	7.06593	74.7868	79.5524	152.688	11.2771	3.49532	9.9721e-11	2.89995e-09
TNK2	493.097	295.161	333.276	25.8877	21.214	78.0407	-8.69857	-3.12078	1.01602e-10	2.94746e-09
PLIN3	2.80169	5.27073	3.53296	57.5283	42.4279	125.544	19.0537	4.252	1.03107e-10	2.98382e-09
HNRNPA2B1	1672.61	2491.3	2319.98	290.518	360.637	230.729	-7.43565	-2.89446	1.06959e-10	3.08779e-09
NDUFB4	0	1.75691	1.17765	106.427	53.0349	179.833	96.5185	6.59273	1.08278e-10	3.1183e-09
TATDN2	0	5.27073	1.17765	86.2925	63.6419	57.6823	33.4955	5.0659	1.11517e-10	3.20382e-09
TGFBI	9.80591	5.27073	4.71062	86.2925	68.9454	64.4684	10.9802	3.45683	1.14383e-10	3.27825e-09
ITGB1BP1	9.80591	14.0553	7.06593	74.7868	74.2489	122.151	9.0381	3.17602	1.15964e-10	3.31556e-09
PRSS23	140.084	56.2211	62.4157	552.272	551.563	661.649	6.79487	2.76445	1.22202e-10	3.47803e-09
AQR	176.506	191.503	166.049	23.0113	42.4279	3.39307	-8.52771	-3.09216	1.22231e-10	3.47803e-09
TK2	2.80169	0	4.71062	66.1576	42.4279	88.2199	22.464	4.48954	1.27637e-10	3.62318e-09
MYL9	285.772	228.398	234.353	14.3821	15.9105	47.503	-9.35393	-3.22557	1.31189e-10	3.71515e-09
THBS1	661.199	212.586	250.84	3888.91	10108.5	1543.85	13.8035	3.78696	1.36846e-10	3.86614e-09
SCARB2	57.4346	63.2488	64.771	304.9	376.548	349.487	5.43421	2.44207	1.39668e-10	3.93651e-09
CALCRL	523.916	400.576	360.362	57.5283	95.4628	20.3584	-7.76569	-2.95711	1.45864e-10	4.09019e-09
VAV2	21.0127	12.2984	15.3095	92.0453	132.587	125.544	6.81065	2.76779	1.45842e-10	4.09019e-09
CYBC1	2.80169	5.27073	10.5989	83.4161	47.7314	118.758	12.742	3.67152	1.46152e-10	4.09019e-09
UCP2	435.663	258.266	189.602	2.87642	0	3.39307	-111.22	-6.79727	1.53159e-10	4.27623e-09
DNAJC2	189.114	226.641	170.76	23.0113	26.5175	37.3238	-6.63897	-2.73096	1.57592e-10	4.38968e-09
SMPD1	51.8312	56.2211	49.4615	264.63	243.961	505.568	6.47042	2.69386	1.62238e-10	4.50855e-09
ATG13	28.0169	29.8675	36.5073	284.765	143.194	159.474	6.26252	2.64674	1.66496e-10	4.61609e-09
GBA	26.616	40.4089	57.7051	212.855	185.622	363.059	6.06581	2.6007	1.70587e-10	4.71851e-09
NLRP1	1.40084	3.51382	10.5989	80.5396	63.6419	67.8615	12.328	3.62387	1.82384e-10	5.03312e-09
PLEKHM2	28.0169	19.326	28.2637	184.091	90.1594	203.584	6.35661	2.66826	1.89471e-10	5.21658e-09
ESAM	96.6583	80.8179	94.2124	388.316	434.886	736.297	5.72246	2.51663	2.00075e-10	5.49583e-09
GMPR	4.20253	3.51382	2.35531	37.3934	63.6419	118.758	20.6704	4.36949	2.02873e-10	5.55985e-09
DAPK1	1.40084	0	1.17765	100.675	190.926	47.503	94.6851	6.56506	2.04018e-10	5.57054e-09
THOC2	303.983	360.167	355.652	46.0227	74.2489	6.78615	-8.745	-3.12846	2.042e-10	5.57054e-09
KHNYN	12.6076	8.78455	7.06593	115.057	106.07	61.0753	9.74331	3.28441	2.05393e-10	5.59026e-09
BTBD3	156.895	154.608	174.293	20.1349	15.9105	13.5723	-9.54705	-3.25505	2.09288e-10	5.68327e-09
LRP10	92.4557	82.5748	102.456	460.227	482.618	502.175	5.1149	2.35471	2.11393e-10	5.72735e-09
TNPO2	397.84	363.68	335.632	69.034	47.7314	57.6823	-6.03908	-2.59433	2.2089e-10	5.97105e-09
LMNB1	141.485	186.232	133.075	14.3821	0	3.39307	-20.4274	-4.35243	2.23257e-10	6.02135e-09
CIZ1	15.4093	15.8122	27.0861	152.45	90.1594	152.688	6.75535	2.75603	2.39634e-10	6.43522e-09
CCDC92	1.40084	10.5415	4.71062	69.034	47.7314	91.613	13.3874	3.7428	2.39684e-10	6.43522e-09
FAAP100	2.80169	7.02764	7.06593	48.8991	68.9454	88.2199	11.5555	3.53051	2.44136e-10	6.53999e-09
ANGPT2	1.40084	0	3.53296	138.068	74.2489	37.3238	40.6127	5.34386	2.51283e-10	6.71632e-09
FTL	1283.17	1370.39	1843.03	7915.9	7493.83	26506.7	9.32033	3.22038	2.52231e-10	6.72655e-09
TRMT112	0	0	2.35531	77.6632	58.3384	186.619	93.3244	6.54418	2.67625e-10	7.1211e-09
TPP2	421.654	493.692	492.26	100.675	58.3384	20.3584	-7.68309	-2.94169	2.7388e-10	7.27126e-09
FAM114A1	16.8101	29.8675	24.7307	138.068	137.891	125.544	5.64648	2.49735	2.82116e-10	7.47325e-09
C4orf3	1.40084	3.51382	2.35531	46.0227	79.5524	74.6476	24.696	4.6262	2.86939e-10	7.58411e-09
C14orf119	5.60338	14.0553	9.42124	74.7868	74.2489	135.723	9.92842	3.31156	2.91765e-10	7.69457e-09
LSS	21.0127	24.5967	8.24358	100.675	148.498	128.937	7.12174	2.83223	3.04295e-10	8.00725e-09
PDXK	15.4093	5.27073	9.42124	146.697	63.6419	88.2199	9.78511	3.29059	3.46218e-10	9.09032e-09
TUBB2A	456.675	258.266	215.511	14.3821	53.0349	40.7169	-9.00094	-3.17007	3.4758e-10	9.10599e-09
ZNF438	2.80169	1.75691	0	57.5283	63.6419	88.2199	42.2791	5.40187	3.65793e-10	9.56208e-09
BMI1	121.873	195.017	121.298	2.87642	10.607	10.1792	-19.291	-4.26985	3.74507e-10	9.76839e-09
PUM2	476.287	446.255	448.686	77.6632	111.373	33.9307	-6.52495	-2.70597	3.75593e-10	9.77529e-09
CTCF	190.515	170.42	221.399	43.1462	26.5175	16.9654	-6.48261	-2.69657	3.81436e-10	9.90566e-09
EZH2	121.873	126.498	141.319	8.62925	15.9105	6.78615	-13.247	-3.72759	4.1582e-10	1.07751e-08
CCT2	869.924	832.775	823.181	117.933	95.4628	142.509	-6.9155	-2.78983	4.18014e-10	1.08084e-08
KAT2A	183.511	223.128	213.155	25.8877	21.214	47.503	-6.29602	-2.65444	4.49523e-10	1.15728e-08
PEPD	19.6118	17.5691	29.4414	123.686	100.766	186.619	6.07063	2.60185	4.4891e-10	1.15728e-08
MFNG	19.6118	28.1106	34.152	120.809	153.801	295.197	6.89191	2.7849	4.59992e-10	1.18167e-08
NINJ1	11.2068	8.78455	12.9542	74.7868	63.6419	227.336	10.8603	3.44099	4.63869e-10	1.18907e-08
SCRN1	1.40084	0	0	238.743	201.533	54.2892	229.01	7.83927	4.78224e-10	1.22322e-08
PRPF40A	365.62	458.554	443.976	57.5283	106.07	61.0753	-5.98961	-2.58246	5.01546e-10	1.28013e-08
CD9	166.7	89.6024	115.41	768.003	689.454	1075.6	6.79301	2.76405	5.04394e-10	1.28464e-08
DNM1L	303.983	312.73	302.657	34.517	79.5524	33.9307	-6.82818	-2.7715	5.11095e-10	1.29892e-08
VARS1	312.388	284.619	367.428	57.5283	37.1244	61.0753	-5.97067	-2.57789	5.12507e-10	1.29974e-08
HEBP1	22.4135	22.8398	11.7765	123.686	84.8559	173.047	6.9428	2.79552	5.14445e-10	1.30187e-08
FHL1	0	1.75691	1.17765	60.4047	111.373	88.2199	69.9233	6.1277	5.22221e-10	1.31875e-08
CPE	480.49	481.393	562.919	2.87642	0	0	-349.009	-8.44712	5.43809e-10	1.37035e-08
FADS2	43.4262	22.8398	21.1978	207.102	137.891	166.261	5.91849	2.56523	5.46459e-10	1.37412e-08
WSCD1	1.40084	0	3.53296	43.1462	58.3384	101.792	32.3948	5.01769	5.7559e-10	1.44432e-08
MCTP1	1.40084	1.75691	3.53296	69.034	143.194	27.1446	30.6132	4.93608	5.79099e-10	1.45006e-08
NCAPD2	155.494	267.05	274.394	34.517	37.1244	16.9654	-7.94937	-2.99084	5.84273e-10	1.45994e-08
RFX7	124.675	177.448	148.384	20.1349	10.607	6.78615	-11.0812	-3.47004	5.8584e-10	1.46079e-08
COL27A1	2.80169	3.51382	4.71062	54.6519	79.5524	54.2892	15.11	3.91743	5.93542e-10	1.4769e-08
MRPS16	4.20253	7.02764	5.88827	57.5283	42.4279	105.185	11.9394	3.57765	6.53345e-10	1.62231e-08
GLUL	14.0084	14.0553	22.3754	117.933	95.4628	101.792	6.09873	2.60851	6.59514e-10	1.63422e-08
TET3	169.502	147.58	170.76	28.7642	15.9105	6.78615	-8.97192	-3.16542	6.63407e-10	1.64044e-08
NDUFB10	15.4093	8.78455	14.1319	63.2811	90.1594	237.515	9.94935	3.3146	6.66162e-10	1.64044e-08
PROCR	39.2236	42.1658	41.2179	342.293	116.677	481.816	7.70148	2.94514	6.65727e-10	1.64044e-08
CYSTM1	2.80169	0	0	60.4047	68.9454	135.723	74.8988	6.22687	6.90122e-10	1.69593e-08
CALD1	1291.58	850.345	679.507	115.057	180.319	67.8615	-7.92321	-2.98609	6.9686e-10	1.70896e-08
UBR3	343.207	291.647	299.124	51.7755	58.3384	6.78615	-8.30405	-3.05382	7.10282e-10	1.73829e-08
FAM126A	313.789	265.293	244.952	43.1462	58.3384	23.7515	-6.85063	-2.77624	7.33587e-10	1.79164e-08
NPDC1	43.4262	36.8951	15.3095	178.338	137.891	529.32	8.86741	3.14851	7.37158e-10	1.79667e-08
PTEN	411.848	439.228	471.062	77.6632	100.766	71.2546	-5.46656	-2.45063	7.48757e-10	1.81749e-08
STXBP2	1.40084	7.02764	8.24358	57.5283	47.7314	98.3991	11.8506	3.56689	7.4825e-10	1.81749e-08
STIM2	238.144	249.481	207.267	23.0113	47.7314	37.3238	-6.7548	-2.75591	7.60848e-10	1.84308e-08
ANPEP	0	0	0	1651.06	1071.31	1506.52	5658.44	12.4662	7.73999e-10	1.87113e-08
STK10	16.8101	24.5967	20.0201	163.956	106.07	98.3991	6.16515	2.62414	7.91541e-10	1.90965e-08
DHX9	732.642	690.466	641.822	103.551	143.194	88.2199	-6.38872	-2.67553	8.00278e-10	1.92682e-08
TBC1D7	2.80169	1.75691	9.42124	89.1689	47.7314	57.6823	12.6182	3.65743	8.09616e-10	1.94537e-08
TYK2	12.6076	12.2984	11.7765	100.675	68.9454	91.613	7.26865	2.86169	8.20572e-10	1.96772e-08
MEGF6	1.40084	0	0	97.7981	132.587	166.261	182.75	7.51373	8.43882e-10	2.01954e-08
SELENOH	2.80169	17.5691	18.8425	69.034	100.766	325.735	12.4545	3.6386	8.48444e-10	2.02638e-08
CAPG	456.675	681.681	697.172	83.4161	31.8209	125.544	-7.32866	-2.87355	8.91035e-10	2.12384e-08
CYRIB	149.89	159.879	197.846	14.3821	42.4279	16.9654	-7.74419	-2.95311	9.17736e-10	2.18311e-08
ARHGEF28	23.8144	17.5691	20.0201	86.2925	185.622	132.33	6.24551	2.64282	9.30933e-10	2.21008e-08
SYNCRIP	599.561	695.736	631.223	109.304	137.891	74.6476	-6.15782	-2.62242	9.64889e-10	2.28613e-08
CD151	113.468	94.8731	124.831	733.486	408.369	1408.13	7.6467	2.93484	1.00275e-09	2.37112e-08
SLC25A29	0	1.75691	1.17765	57.5283	58.3384	149.295	75.0015	6.22885	1.03045e-09	2.43179e-08
KLHDC8B	9.80591	1.75691	1.17765	34.517	74.2489	173.047	20.9284	4.38739	1.05605e-09	2.48726e-08
BRI3	35.0211	28.1106	44.7509	189.843	148.498	661.649	9.20284	3.20208	1.08564e-09	2.54365e-08
SLC2A6	5.60338	0	0	48.8991	47.7314	105.185	31.9665	4.99849	1.0875e-09	2.54365e-08
ANKLE2	14.0084	15.8122	20.0201	120.809	121.98	78.0407	6.1978	2.63176	1.08509e-09	2.54365e-08
SELENOW	4.20253	1.75691	15.3095	92.0453	58.3384	162.868	13.6401	3.76978	1.08855e-09	2.54365e-08
RPL7A	149.89	156.365	215.511	903.195	769.006	2877.33	8.70821	3.12238	1.14822e-09	2.6726e-08
RNASEH2C	1.40084	1.75691	0	54.6519	53.0349	169.654	77.3397	6.27314	1.14643e-09	2.6726e-08
SEC22C	4.20253	5.27073	3.53296	63.2811	47.7314	57.6823	12.9724	3.69737	1.21886e-09	2.83147e-08
CHMP3	9.80591	24.5967	24.7307	132.315	106.07	128.937	6.28407	2.6517	1.22771e-09	2.84646e-08
AGPAT2	5.60338	0	2.35531	51.7755	31.8209	176.44	29.2086	4.86832	1.24378e-09	2.87811e-08
KPNB1	1550.73	1430.12	1543.91	293.394	217.443	152.688	-6.72262	-2.74902	1.28097e-09	2.95841e-08
GRHPR	8.40507	1.75691	1.17765	63.2811	37.1244	84.8268	15.9954	3.99959	1.29213e-09	2.97841e-08
HNRNPLL	169.502	200.288	214.333	48.8991	21.214	10.1792	-6.72609	-2.74977	1.3461e-09	3.09268e-08
TMEM219	21.0127	7.02764	15.3095	112.18	63.6419	183.226	8.13109	3.02345	1.3469e-09	3.09268e-08
TNFAIP8L1	1.40084	7.02764	3.53296	34.517	58.3384	152.688	20.1186	4.33045	1.35578e-09	3.10706e-08
SLC52A2	1.40084	1.75691	1.17765	80.5396	21.214	118.758	45.2739	5.50061	1.36281e-09	3.11717e-08
PDS5B	175.106	233.669	182.536	20.1349	53.0349	30.5377	-6.16439	-2.62396	1.37779e-09	3.14538e-08
WIPI1	18.211	21.0829	31.7967	152.45	132.587	111.971	5.43295	2.44174	1.38243e-09	3.14992e-08
GPX1	131.679	108.928	151.917	721.98	509.135	2246.21	8.84468	3.14481	1.38756e-09	3.15557e-08
CCNYL1	214.329	205.558	208.445	37.3934	53.0349	6.78615	-6.91308	-2.78933	1.45505e-09	3.30275e-08
MZT2B	0	1.75691	1.17765	51.7755	37.1244	217.157	86.0579	6.42724	1.52634e-09	3.45796e-08
FAM219B	2.80169	1.75691	11.7765	46.0227	90.1594	88.2199	11.961	3.58026	1.53533e-09	3.47172e-08
RPL13A	256.355	226.641	243.775	1397.94	864.469	4587.44	9.42064	3.23583	1.54717e-09	3.49185e-08
SRSF7	190.515	265.293	252.018	23.0113	37.1244	47.503	-6.68032	-2.73992	1.55449e-09	3.50173e-08
NAA25	161.097	138.796	174.293	20.1349	31.8209	10.1792	-8.21753	-3.0387	1.55781e-09	3.50257e-08
EPB41L1	180.709	200.288	189.602	0	10.607	0	-71.1314	-6.15241	1.58364e-09	3.55392e-08
C7orf50	4.20253	0	5.88827	54.6519	31.8209	162.868	22.0266	4.46118	1.65399e-09	3.7048e-08
COPS2	442.667	407.603	434.555	25.8877	116.677	13.5723	-8.63844	-3.11077	1.68604e-09	3.76951e-08
NUP155	172.304	91.3593	121.298	11.5057	0	13.5723	-13.2113	-3.7237	1.69016e-09	3.77162e-08
AGRN	29.4177	43.9228	24.7307	138.068	159.105	213.764	5.32673	2.41325	1.70553e-09	3.79879e-08
PAPSS2	1.40084	0	0	261.754	95.4628	64.4684	197.022	7.62221	1.71766e-09	3.81695e-08
C19orf53	0	1.75691	2.35531	48.8991	42.4279	111.971	41.7644	5.3842	1.7201e-09	3.81695e-08
RAPH1	201.722	256.509	277.926	40.2698	42.4279	0	-9.05397	-3.17855	1.73455e-09	3.84184e-08
TMED3	42.0253	26.3537	25.9084	189.843	106.07	298.591	6.33957	2.66438	1.75488e-09	3.87966e-08
CLN8	0	3.51382	7.06593	66.1576	100.766	37.3238	16.9009	4.07903	1.77609e-09	3.91926e-08
MCM4	224.135	142.31	142.496	20.1349	5.30349	30.5377	-8.30516	-3.05401	1.7947e-09	3.953e-08
GARRE1	254.954	289.89	306.19	57.5283	47.7314	20.3584	-6.71742	-2.74791	1.84615e-09	4.0588e-08
BTG1	554.734	455.04	474.595	112.18	74.2489	71.2546	-5.57059	-2.47783	1.85211e-09	4.06439e-08
P3H1	30.8186	15.8122	24.7307	155.326	84.8559	156.081	5.61023	2.48806	1.8718e-09	4.10004e-08
AURKAIP1	7.00422	7.02764	1.17765	51.7755	37.1244	196.798	18.6356	4.21999	1.8789e-09	4.10801e-08
GORASP1	1.40084	1.75691	3.53296	71.9104	58.3384	40.7169	22.355	4.48253	1.88443e-09	4.11255e-08
PLSCR3	4.20253	10.5415	9.42124	77.6632	42.4279	186.619	12.5771	3.65273	1.91886e-09	4.18002e-08
IPO9	483.291	502.476	465.174	77.6632	132.587	61.0753	-5.6972	-2.51025	1.94001e-09	4.21837e-08
VCPIP1	161.097	219.614	233.176	46.0227	31.8209	3.39307	-7.41627	-2.89069	1.95322e-09	4.23933e-08
RAB13	29.4177	35.1382	34.152	155.326	116.677	363.059	6.45109	2.68954	1.97033e-09	4.2687e-08
SSR4	32.2194	35.1382	35.3296	140.944	121.98	441.1	6.85002	2.77611	2.03188e-09	4.39403e-08
MAN1B1	33.6203	17.5691	24.7307	120.809	100.766	261.267	6.31485	2.65875	2.04142e-09	4.40665e-08
GOLM1	12.6076	8.78455	15.3095	100.675	74.2489	78.0407	6.7283	2.75024	2.0497e-09	4.41651e-08
USP9X	784.473	732.632	813.759	117.933	175.015	64.4684	-6.94972	-2.79695	2.07341e-09	4.45952e-08
DPYSL2	23.8144	14.0553	17.6648	97.7981	127.284	108.578	5.71583	2.51496	2.11563e-09	4.5421e-08
FNDC4	5.60338	8.78455	12.9542	109.304	37.1244	156.081	10.8763	3.44311	2.15709e-09	4.62278e-08
HOXD8	127.477	133.525	118.943	20.1349	10.607	10.1792	-8.57329	-3.09985	2.16426e-09	4.62433e-08
SGTA	12.6076	12.2984	15.3095	83.4161	84.8559	118.758	6.97068	2.8013	2.16559e-09	4.62433e-08
MTF2	79.8481	158.122	147.207	8.62925	10.607	10.1792	-12.9569	-3.69565	2.17299e-09	4.63181e-08
MRPL37	11.2068	14.0553	24.7307	83.4161	95.4628	196.798	7.32489	2.87281	2.24752e-09	4.7816e-08
YIPF2	8.40507	1.75691	8.24358	60.4047	42.4279	95.0061	10.0719	3.33226	2.2513e-09	4.7816e-08
STARD7	50.4304	38.652	41.2179	138.068	371.244	200.191	5.30595	2.40761	2.27865e-09	4.83107e-08
ZBTB40	12.6076	14.0553	12.9542	117.933	116.677	61.0753	7.30797	2.86947	2.31467e-09	4.89869e-08
PTP4A1	351.612	326.785	339.165	46.0227	95.4628	50.8961	-5.73607	-2.52006	2.33384e-09	4.93049e-08
PHF12	194.717	184.476	169.582	34.517	31.8209	37.3238	-5.18628	-2.3747	2.46603e-09	5.20054e-08
ARIH1	317.992	319.758	355.652	69.034	74.2489	47.503	-5.30233	-2.40663	2.48088e-09	5.22259e-08
SH3BP2	14.0084	17.5691	25.9084	109.304	90.1594	145.902	5.92443	2.56668	2.54038e-09	5.3196e-08
PHPT1	2.80169	3.51382	2.35531	40.2698	21.214	278.232	36.7236	5.19864	2.53352e-09	5.3196e-08
PRR13	14.0084	1.75691	8.24358	77.6632	53.0349	179.833	12.3724	3.62905	2.53791e-09	5.3196e-08
ZNF462	163.899	147.58	120.121	5.75283	0	3.39307	-37.0303	-5.21063	2.54859e-09	5.32741e-08
COMMD6	2.80169	0	4.71062	34.517	63.6419	91.613	20.8804	4.38408	2.5592e-09	5.33316e-08
HSDL1	4.20253	1.75691	1.17765	43.1462	58.3384	67.8615	21.4385	4.42213	2.56031e-09	5.33316e-08
NACC2	14.0084	10.5415	20.0201	86.2925	137.891	91.613	6.37818	2.67315	2.58854e-09	5.38253e-08
TPP1	113.468	80.8179	154.273	747.868	928.111	461.458	6.05891	2.59906	2.59947e-09	5.39583e-08
FAM189B	4.20253	7.02764	2.35531	60.4047	37.1244	71.2546	13.2371	3.72652	2.64155e-09	5.47363e-08
RPS19BP1	2.80169	3.51382	3.53296	63.2811	21.214	98.3991	17.8916	4.16121	2.69657e-09	5.57792e-08
PCNT	7.00422	7.02764	4.71062	71.9104	90.1594	37.3238	10.1623	3.34515	2.85986e-09	5.90542e-08
ROBO4	109.266	137.039	127.187	572.407	530.349	990.778	5.62433	2.49168	2.94776e-09	6.07637e-08
MTCL1	0	3.51382	5.88827	66.1576	79.5524	37.3238	16.9437	4.08267	2.98925e-09	6.15123e-08
S100A11	47.6287	52.7073	48.2838	230.113	137.891	315.556	4.68303	2.22744	3.03755e-09	6.23982e-08
H6PD	12.6076	5.27073	8.24358	60.4047	100.766	81.4338	8.44454	3.07802	3.10136e-09	6.34897e-08
MRPL51	7.00422	10.5415	5.88827	57.5283	53.0349	122.151	10.0773	3.33303	3.09668e-09	6.34897e-08
MBOAT7	32.2194	38.652	36.5073	158.203	143.194	217.157	4.90011	2.29282	3.13934e-09	6.4157e-08
SF3B3	664	667.626	711.303	97.7981	132.587	128.937	-5.83409	-2.54451	3.1564e-09	6.43949e-08
RPL22L1	254.954	260.023	233.176	40.2698	21.214	50.8961	-6.21036	-2.63468	3.26274e-09	6.63369e-08
RPL41	166.7	156.365	207.267	822.655	763.703	2694.1	8.06179	3.0111	3.26017e-09	6.63369e-08
RBMS1	348.81	412.874	390.981	97.7981	37.1244	33.9307	-6.2585	-2.64582	3.40116e-09	6.9033e-08
UQCRH	25.2152	8.78455	28.2637	92.0453	111.373	281.625	7.60659	2.92725	3.44385e-09	6.97806e-08
TCEA1	317.992	375.979	393.337	86.2925	63.6419	30.5377	-5.90754	-2.56256	3.48528e-09	7.04999e-08
PLAAT3	1.40084	0	0	106.427	74.2489	166.261	163.851	7.35624	3.54031e-09	7.14914e-08
OSTC	18.211	5.27073	16.4872	129.439	116.677	64.4684	7.35192	2.87812	3.63266e-09	7.3168e-08
BCLAF1	407.646	386.52	402.758	100.675	68.9454	44.11	-5.4345	-2.44215	3.63564e-09	7.3168e-08
GM2A	1.40084	0	0	109.304	74.2489	132.33	152.515	7.25281	3.65873e-09	7.35083e-08
LDLRAP1	5.60338	1.75691	7.06593	63.2811	42.4279	64.4684	10.9472	3.45249	3.68281e-09	7.3743e-08
SOX13	273.165	228.398	181.359	37.3934	31.8209	40.7169	-6.06107	-2.59957	3.682e-09	7.3743e-08
RNF144B	2.80169	0	1.17765	80.5396	53.0349	44.11	36.9217	5.2064	3.69908e-09	7.39444e-08
TNRC6A	281.57	419.902	421.6	54.6519	95.4628	16.9654	-7.00694	-2.80878	3.82959e-09	7.64247e-08
SNX19	35.0211	21.0829	31.7967	189.843	212.14	98.3991	5.51546	2.46348	3.88896e-09	7.74795e-08
CTDSPL	1.40084	0	1.17765	46.0227	58.3384	111.971	61.4058	5.9403	3.905e-09	7.76689e-08
DHX15	495.899	648.3	674.796	109.304	127.284	33.9307	-6.83623	-2.7732	4.03452e-09	8.00344e-08
SIRPA	0	1.75691	0	112.18	84.8559	105.185	144.174	7.17167	4.03738e-09	8.00344e-08
HSPA1B	22.4135	0	7.06593	408.451	63.6419	81.4338	18.241	4.18911	4.08596e-09	8.08627e-08
RSAD1	4.20253	3.51382	4.71062	48.8991	37.1244	88.2199	13.4189	3.7462	4.15297e-09	8.20521e-08
ABHD4	39.2236	35.1382	58.8827	293.394	190.926	152.688	4.73989	2.24485	4.22471e-09	8.33311e-08
BTBD6	1.40084	0	0	74.7868	90.1594	190.012	165.377	7.36962	4.23349e-09	8.3366e-08
HAT1	145.688	135.282	115.41	20.1349	21.214	3.39307	-8.92487	-3.15783	4.2761e-09	8.40659e-08
ERGIC2	154.093	149.337	142.496	14.3821	15.9105	27.1446	-7.60894	-2.92769	4.31445e-09	8.46801e-08
PPP1CB	588.355	628.974	627.69	80.5396	148.498	23.7515	-7.50855	-2.90853	4.37813e-09	8.57355e-08
MBD3	14.0084	17.5691	18.8425	117.933	42.4279	318.949	9.45377	3.24089	4.38265e-09	8.57355e-08
ITGA5	337.604	411.117	495.793	2140.05	2354.75	2697.49	5.76231	2.52665	4.45386e-09	8.69856e-08
PLK3	376.827	226.641	253.196	48.8991	21.214	54.2892	-6.50917	-2.70247	4.49387e-09	8.76232e-08
BCOR	120.473	119.47	136.608	20.1349	21.214	6.78615	-7.97081	-2.99473	4.56748e-09	8.89125e-08
MDN1	173.705	144.067	191.958	40.2698	15.9105	10.1792	-7.09248	-2.82629	4.66567e-09	9.056e-08
KLHL7	128.878	173.934	135.43	23.0113	21.214	6.78615	-8.4561	-3.07999	4.67495e-09	9.056e-08
INTS2	100.861	130.011	130.72	17.2585	15.9105	6.78615	-8.94595	-3.16124	4.67288e-09	9.056e-08
ACADVL	58.8355	52.7073	67.1263	253.125	270.478	359.666	4.8786	2.28647	4.8491e-09	9.37807e-08
RFNG	1.40084	0	2.35531	46.0227	74.2489	57.6823	34.3154	5.10079	4.90254e-09	9.46603e-08
LDLRAD2	5.60338	1.75691	1.17765	0	10.607	1228.29	133.563	7.06137	4.97399e-09	9.58843e-08
NOP53	37.8228	36.8951	45.9285	163.956	159.105	570.036	7.3729	2.88223	5.42954e-09	1.04497e-07
MAF1	30.8186	26.3537	35.3296	135.192	106.07	196.798	4.74144	2.24533	5.48834e-09	1.05458e-07
NGRN	8.40507	8.78455	10.5989	60.4047	58.3384	88.2199	7.27536	2.86302	5.51066e-09	1.05716e-07
TRIM56	11.2068	14.0553	12.9542	69.034	111.373	78.0407	6.36354	2.66983	5.52027e-09	1.0573e-07
MAPKAPK3	0	3.51382	4.71062	60.4047	31.8209	61.0753	17.7485	4.14962	5.5379e-09	1.05879e-07
MTRF1L	2.80169	3.51382	4.71062	57.5283	42.4279	47.503	12.6911	3.66574	5.54585e-09	1.05879e-07
RAB31	12.6076	14.0553	27.0861	135.192	84.8559	108.578	6.00478	2.58611	5.57654e-09	1.06294e-07
SERBP1	1025.42	1073.47	1149.39	152.45	153.801	227.336	-6.04317	-2.59531	5.66852e-09	1.07874e-07
GGA3	11.2068	17.5691	16.4872	92.0453	100.766	95.0061	6.24922	2.64368	5.70978e-09	1.08486e-07
DKK3	0	0	0	776.632	922.807	922.916	3465.84	11.759	5.82013e-09	1.10406e-07
BNIP3	7.00422	8.78455	8.24358	77.6632	31.8209	71.2546	7.92607	2.98661	5.93739e-09	1.12094e-07
LTBP3	53.2321	29.8675	49.4615	149.574	185.622	407.169	5.5498	2.47244	5.91862e-09	1.12094e-07
ZDHHC17	91.0549	137.039	130.72	17.2585	15.9105	3.39307	-9.72812	-3.28216	5.93611e-09	1.12094e-07
SLC26A11	2.80169	1.75691	1.17765	43.1462	47.7314	61.0753	23.8971	4.57876	6.2631e-09	1.18056e-07
HEBP2	0	1.75691	0	74.7868	79.5524	152.688	142.805	7.1579	6.28124e-09	1.18211e-07
SYNM	1.40084	1.75691	1.17765	69.034	53.0349	40.7169	33.5506	5.06827	6.3303e-09	1.18946e-07
TCOF1	4.20253	7.02764	4.71062	40.2698	53.0349	88.2199	11.1887	3.48397	6.38443e-09	1.19774e-07
UBE2L6	0	3.51382	3.53296	37.3934	53.0349	81.4338	22.0843	4.46495	6.43652e-09	1.20561e-07
TM7SF3	12.6076	7.02764	8.24358	57.5283	79.5524	74.6476	7.15405	2.83876	6.69665e-09	1.25236e-07
AGFG1	364.22	440.984	373.317	86.2925	74.2489	13.5723	-6.78326	-2.76198	6.73414e-09	1.25302e-07
ANXA5	126.076	119.47	114.233	773.756	562.17	458.065	5.00891	2.3245	6.71372e-09	1.25302e-07
MRPL41	0	0	2.35531	48.8991	37.1244	139.116	65.586	6.03532	6.74232e-09	1.25302e-07
F2RL3	1.40084	3.51382	2.35531	8.62925	106.07	152.688	33.8027	5.07906	6.72514e-09	1.25302e-07
NAE1	168.101	180.962	155.45	17.2585	47.7314	30.5377	-5.72333	-2.51685	6.83253e-09	1.2678e-07
S100A13	8.40507	8.78455	2.35531	57.5283	31.8209	244.301	16.9266	4.08122	6.86324e-09	1.27152e-07
MFSD12	2.80169	5.27073	4.71062	63.2811	21.214	105.185	14.5826	3.86618	6.95305e-09	1.28615e-07
HSPA4	981.992	955.759	976.276	143.821	212.14	162.868	-5.83714	-2.54526	7.05476e-09	1.30294e-07
RANBP3	14.0084	10.5415	10.5989	80.5396	42.4279	111.971	6.84075	2.77415	7.20287e-09	1.32823e-07
KEAP1	37.8228	12.2984	32.9743	155.326	111.373	234.122	5.92651	2.56718	7.38632e-09	1.35995e-07
MMP10	0	1.75691	0	184.091	42.4279	105.185	154.04	7.26716	7.48263e-09	1.37556e-07
MTX2	176.506	149.337	147.207	14.3821	31.8209	27.1446	-6.82345	-2.7705	7.50441e-09	1.37743e-07
FES	144.287	156.365	169.582	25.8877	21.214	23.7515	-6.48395	-2.69687	7.67901e-09	1.40731e-07
COL4A5	12.6076	8.78455	3.53296	106.427	95.4628	40.7169	9.66865	3.27332	8.01947e-09	1.46744e-07
MMRN1	0	0	0	581.036	1739.55	369.845	3579.84	11.8057	8.15211e-09	1.48942e-07
R3HDM2	182.11	180.962	184.892	37.3934	53.0349	23.7515	-5.03406	-2.33172	8.26164e-09	1.50712e-07
MADD	33.6203	19.326	20.0201	109.304	121.98	156.081	5.24044	2.38969	8.29105e-09	1.51002e-07
KDM6A	141.485	175.691	134.253	31.6406	10.607	0	-9.39823	-3.23239	8.30294e-09	1.51002e-07
CMTM6	1.40084	0	1.17765	66.1576	121.98	30.5377	60.5392	5.9198	8.40987e-09	1.52713e-07
ZC3H7A	224.135	244.211	280.282	40.2698	47.7314	47.503	-5.60558	-2.48686	8.5883e-09	1.55715e-07
AMD1	161.097	175.691	175.471	40.2698	31.8209	3.39307	-6.6966	-2.74343	8.65732e-09	1.5649e-07
SMO	172.304	166.906	153.095	2.87642	0	3.39307	-61.3188	-5.93826	8.64499e-09	1.5649e-07
BCL2L13	18.211	14.0553	22.3754	100.675	132.587	84.8268	5.40081	2.43318	9.03275e-09	1.63028e-07
USP19	191.916	209.072	210.8	48.8991	31.8209	37.3238	-4.96175	-2.31085	9.30774e-09	1.67737e-07
ELAPOR2	2.80169	0	0	63.2811	90.1594	47.503	53.9353	5.75316	9.34043e-09	1.68071e-07
MPST	7.00422	7.02764	7.06593	43.1462	42.4279	203.584	13.3707	3.741	9.44723e-09	1.69736e-07
PPIG	177.907	186.232	207.267	48.8991	31.8209	33.9307	-4.80227	-2.26372	9.71688e-09	1.74318e-07
CNTNAP1	8.40507	7.02764	8.24358	80.5396	58.3384	44.11	7.63857	2.9333	9.89812e-09	1.77302e-07
PAN3	96.6583	156.365	122.476	17.2585	26.5175	0	-9.17669	-3.19797	9.92064e-09	1.77438e-07
MAP2K4	190.515	177.448	191.958	43.1462	53.0349	16.9654	-5.16156	-2.36781	1.01102e-08	1.80557e-07
PPP2CA	816.692	816.963	882.063	152.45	185.622	71.2546	-6.3964	-2.67726	1.01611e-08	1.81193e-07
U2AF2	792.878	725.604	786.673	126.562	132.587	149.295	-5.66059	-2.50095	1.01834e-08	1.8132e-07
IFITM2	12.6076	38.652	27.0861	178.338	79.5524	261.267	6.70789	2.74586	1.02835e-08	1.82829e-07
HIGD2A	1.40084	3.51382	1.17765	31.6406	31.8209	135.723	30.9332	4.95109	1.03333e-08	1.8329e-07
P3H3	39.2236	33.3813	28.2637	135.192	127.284	240.908	5.0354	2.33211	1.03403e-08	1.8329e-07
TSC22D2	218.532	149.337	134.253	37.3934	21.214	6.78615	-7.34389	-2.87654	1.04178e-08	1.84388e-07
F11R	22.4135	35.1382	30.619	83.4161	254.568	190.012	5.86559	2.55228	1.06141e-08	1.87584e-07
USP1	130.279	119.47	100.101	14.3821	26.5175	0	-9.41516	-3.23499	1.08288e-08	1.91095e-07
OVCA2	7.00422	0	5.88827	46.0227	37.1244	108.578	13.5158	3.75658	1.09292e-08	1.9258e-07
PEDS1	33.6203	28.1106	34.152	123.686	116.677	179.833	4.36282	2.12526	1.10086e-08	1.93692e-07
PLAA	243.747	226.641	286.17	46.0227	63.6419	23.7515	-5.99412	-2.58355	1.10404e-08	1.93965e-07
RPL7L1	7.00422	17.5691	15.3095	74.7868	90.1594	84.8268	6.13657	2.61743	1.11311e-08	1.95271e-07
TMEM98	12.6076	10.5415	24.7307	80.5396	95.4628	139.116	6.25084	2.64405	1.12147e-08	1.96448e-07
KIAA1191	18.211	21.0829	23.5531	115.057	143.194	84.8268	5.20103	2.3788	1.12541e-08	1.96848e-07
AFAP1	15.4093	12.2984	17.6648	123.686	164.408	47.503	7.08964	2.82571	1.13559e-08	1.98337e-07
PNO1	102.262	105.415	111.877	11.5057	15.9105	3.39307	-10.8348	-3.4376	1.14309e-08	1.99079e-07
RPUSD1	2.80169	5.27073	5.88827	46.0227	37.1244	91.613	12.1228	3.59966	1.14319e-08	1.99079e-07
TFEC	7.00422	7.02764	10.5989	120.809	180.319	23.7515	12.5612	3.6509	1.19511e-08	2.07817e-07
KIAA2013	15.4093	15.8122	21.1978	112.18	63.6419	111.971	5.60332	2.48628	1.2129e-08	2.10601e-07
PCDH19	299.781	119.47	110.7	0	5.30349	3.39307	-64.9568	-6.02141	1.22543e-08	2.12467e-07
RIT1	18.211	15.8122	15.3095	103.551	111.373	74.6476	5.72154	2.5164	1.23127e-08	2.13169e-07
EHMT2	243.747	268.807	273.216	34.517	26.5175	67.8615	-5.85876	-2.5506	1.23492e-08	2.13491e-07
CSNK1E	46.2279	31.6244	44.7509	158.203	169.712	247.694	4.6195	2.20774	1.24521e-08	2.14887e-07
RAP2C	100.861	130.011	108.344	20.1349	5.30349	10.1792	-8.2973	-3.05264	1.24661e-08	2.14887e-07
CD99	0	0	0	555.148	472.011	1190.97	2961.32	11.532	1.24965e-08	2.15098e-07
GOLGA2	12.6076	17.5691	24.7307	169.709	127.284	64.4684	6.45836	2.69117	1.25476e-08	2.15667e-07
MRNIP	8.40507	0	0	60.4047	121.98	27.1446	22.5356	4.49413	1.29459e-08	2.22191e-07
GPX8	1.40084	7.02764	4.71062	106.427	53.0349	30.5377	14.3054	3.83849	1.30081e-08	2.22938e-07
SHOC2	166.7	173.934	160.161	23.0113	53.0349	3.39307	-7.18868	-2.84573	1.3216e-08	2.26065e-07
MDK	0	0	0	227.237	493.225	1784.76	3341.15	11.7061	1.32286e-08	2.26065e-07
CRYAB	170.903	101.901	130.72	8.62925	21.214	23.7515	-7.85356	-2.97335	1.33681e-08	2.2812e-07
ANKIB1	282.971	210.829	244.952	43.1462	63.6419	27.1446	-5.82389	-2.54198	1.34054e-08	2.2843e-07
TPRG1L	50.4304	31.6244	43.5732	181.214	127.284	295.197	4.80866	2.26564	1.35516e-08	2.30446e-07
CHN1	147.089	151.094	109.522	11.5057	31.8209	16.9654	-7.32654	-2.87313	1.35625e-08	2.30446e-07
SOX4	197.519	354.896	365.073	46.0227	68.9454	47.503	-5.78487	-2.53228	1.39248e-08	2.35626e-07
DAAM1	123.274	124.741	136.608	20.1349	31.8209	3.39307	-7.54685	-2.91587	1.39234e-08	2.35626e-07
MCRIP1	18.211	22.8398	11.7765	92.0453	53.0349	322.342	8.87652	3.14999	1.39268e-08	2.35626e-07
SDHAF2	7.00422	3.51382	20.0201	74.7868	63.6419	179.833	9.89422	3.30659	1.3976e-08	2.36124e-07
PSMD14	395.038	326.785	349.763	97.7981	53.0349	27.1446	-5.7909	-2.53379	1.4018e-08	2.36497e-07
DEDD2	2.80169	1.75691	3.53296	63.2811	21.214	57.6823	16.8279	4.07278	1.40579e-08	2.36834e-07
ARHGEF10	4.20253	1.75691	0	74.7868	63.6419	27.1446	25.8165	4.69022	1.41426e-08	2.37588e-07
WASHC2A	22.4135	35.1382	36.5073	143.821	164.408	115.365	4.38054	2.13111	1.41298e-08	2.37588e-07
PPP1CC	484.692	470.852	465.174	94.9217	137.891	40.7169	-5.51989	-2.46464	1.41818e-08	2.3791e-07
EVC	2.80169	1.75691	0	80.5396	106.07	16.9654	39.7912	5.31438	1.43873e-08	2.41017e-07
PNPLA2	63.038	42.1658	30.619	198.473	137.891	363.059	5.18261	2.37368	1.44712e-08	2.42082e-07
ADI1	2.80169	12.2984	17.6648	66.1576	74.2489	179.833	9.53353	3.25301	1.45733e-08	2.43448e-07
TENT4B	124.675	133.525	135.43	25.8877	21.214	6.78615	-7.18449	-2.84489	1.46547e-08	2.44464e-07
KLC1	37.8228	45.6797	37.6849	178.338	217.443	152.688	4.44911	2.15352	1.50769e-08	2.51155e-07
DUSP22	1.40084	3.51382	5.88827	43.1462	42.4279	61.0753	12.3951	3.6317	1.5535e-08	2.58424e-07
CSE1L	280.169	281.106	250.84	31.6406	68.9454	54.2892	-5.5596	-2.47498	1.58166e-08	2.62741e-07
EIF5AL1	102.262	103.658	108.344	0	10.607	10.1792	-16.7662	-4.06748	1.58399e-08	2.62761e-07
TJP1	763.46	836.289	790.206	161.079	137.891	33.9307	-7.18942	-2.84588	1.5959e-08	2.64368e-07
GLRX	11.2068	7.02764	12.9542	126.562	37.1244	78.0407	7.70909	2.94656	1.59945e-08	2.64587e-07
EIF1AY	117.671	107.172	131.897	17.2585	15.9105	20.3584	-6.58899	-2.72006	1.60432e-08	2.65024e-07
TCF20	172.304	128.254	189.602	37.3934	26.5175	13.5723	-6.19566	-2.63126	1.62529e-08	2.68117e-07
OPA1	177.907	158.122	168.405	43.1462	31.8209	20.3584	-5.16183	-2.36788	1.63871e-08	2.69211e-07
RAB14	434.262	481.393	468.707	115.057	63.6419	91.613	-4.84082	-2.27525	1.63674e-08	2.69211e-07
CANT1	40.6245	33.3813	43.5732	221.484	132.587	176.44	4.60169	2.20217	1.63637e-08	2.69211e-07
EMC2	152.692	112.442	113.055	5.75283	31.8209	16.9654	-7.89593	-2.98111	1.6674e-08	2.73546e-07
ACACA	298.38	217.857	277.926	60.4047	47.7314	27.1446	-5.80703	-2.5378	1.68543e-08	2.76123e-07
MKLN1	165.3	187.989	167.227	46.0227	31.8209	30.5377	-4.59339	-2.19956	1.69364e-08	2.77086e-07
RPUSD4	5.60338	8.78455	5.88827	46.0227	58.3384	67.8615	8.33783	3.05967	1.69621e-08	2.77126e-07
WWP1	176.506	209.072	196.668	31.6406	68.9454	20.3584	-5.31789	-2.41085	1.72013e-08	2.80648e-07
gene:ENSG00000258465	112.068	138.796	121.298	23.0113	26.5175	0	-7.74542	-2.95334	1.72483e-08	2.81029e-07
MROH1	16.8101	24.5967	25.9084	83.4161	121.98	142.509	5.02375	2.32876	1.73073e-08	2.81605e-07
VAMP5	1.40084	0	0	71.9104	26.5175	257.874	166.083	7.37576	1.73477e-08	2.81877e-07
NECAP2	30.8186	10.5415	8.24358	112.18	79.5524	166.261	7.19551	2.8471	1.73781e-08	2.81902e-07
CUEDC1	14.0084	3.51382	5.88827	63.2811	42.4279	84.8268	8.04597	3.00827	1.73967e-08	2.81902e-07
DAGLB	4.20253	1.75691	1.17765	43.1462	42.4279	54.2892	18.1848	4.18466	1.79149e-08	2.89904e-07
CSGALNACT1	138.684	101.901	95.39	8.62925	26.5175	6.78615	-9.06147	-3.17975	1.83505e-08	2.96551e-07
EFEMP1	0	0	0	724.857	795.524	444.493	2611.46	11.3506	1.84033e-08	2.97e-07
MARCHF3	1.40084	1.75691	0	63.2811	42.4279	54.2892	46.7852	5.54798	1.8671e-08	3.00911e-07
SLC39A10	98.0591	173.934	141.319	17.2585	31.8209	0	-9.18308	-3.19898	1.87617e-08	3.01965e-07
RPS6KA2	21.0127	38.652	37.6849	192.72	190.926	105.185	4.97324	2.31419	1.88086e-08	3.0231e-07
PDIA5	12.6076	7.02764	18.8425	103.551	58.3384	115.365	7.0282	2.81315	1.92585e-08	3.08707e-07
DDX50	187.713	184.476	161.339	37.3934	31.8209	44.11	-4.55987	-2.18899	1.92584e-08	3.08707e-07
TMEM209	110.667	131.768	107.167	17.2585	26.5175	6.78615	-7.24542	-2.85707	1.94777e-08	3.118e-07
VPS53	339.004	307.459	260.262	51.7755	90.1594	27.1446	-5.7452	-2.52236	1.95808e-08	3.1303e-07
FAM120A	689.216	783.582	739.567	161.079	137.891	84.8268	-5.70336	-2.51181	1.99547e-08	3.18579e-07
NCOA2	103.662	130.011	109.522	8.62925	0	0	-29.2921	-4.87244	2.01694e-08	3.21575e-07
MBNL1	1138.89	1033.06	816.115	175.461	206.836	47.503	-7.01138	-2.8097	2.04107e-08	3.24986e-07
GCNT2	1.40084	1.75691	2.35531	74.7868	42.4279	30.5377	23.9397	4.58133	2.04504e-08	3.25184e-07
FUBP1	340.405	514.775	463.996	117.933	74.2489	33.9307	-5.74227	-2.52162	2.11276e-08	3.35503e-07
CCM2L	109.266	117.713	120.121	8.62925	10.607	27.1446	-7.29755	-2.86741	2.11804e-08	3.35893e-07
TRPM7	247.949	289.89	306.19	43.1462	84.8559	13.5723	-6.6023	-2.72297	2.13093e-08	3.37039e-07
NME3	2.80169	1.75691	1.17765	25.8877	42.4279	115.365	28.8791	4.85195	2.12998e-08	3.37039e-07
CTNS	7.00422	10.5415	12.9542	74.7868	68.9454	64.4684	6.62953	2.72891	2.14579e-08	3.38938e-07
TYRO3	7.00422	5.27073	1.17765	46.0227	63.6419	47.503	11.3654	3.50658	2.16588e-08	3.41658e-07
TPR	627.578	602.62	653.598	126.562	164.408	84.8268	-5.22308	-2.3849	2.20423e-08	3.46857e-07
FKBP10	26.616	29.8675	42.3956	184.091	95.4628	213.764	5.02264	2.32844	2.20467e-08	3.46857e-07
PLXNB3	0	0	1.17765	106.427	74.2489	64.4684	116.779	6.86763	2.2417e-08	3.52217e-07
ATP6V1H	365.62	347.868	335.632	83.4161	58.3384	74.6476	-4.66867	-2.22301	2.27201e-08	3.56507e-07
GGA2	23.8144	21.0829	21.1978	120.809	95.4628	95.0061	4.75952	2.25082	2.28799e-08	3.58542e-07
SLAIN2	176.506	209.072	154.273	48.8991	37.1244	10.1792	-5.47168	-2.45198	2.32255e-08	3.63479e-07
RETSAT	12.6076	8.78455	12.9542	80.5396	63.6419	74.6476	6.25125	2.64415	2.35726e-08	3.68427e-07
YTHDC1	287.173	332.056	233.176	69.034	53.0349	27.1446	-5.59881	-2.48512	2.40621e-08	3.75583e-07
TNKS2	367.021	407.603	481.661	83.4161	95.4628	10.1792	-6.72459	-2.74945	2.41038e-08	3.75741e-07
HNRNPA1L2	75.6456	126.498	118.943	11.5057	0	10.1792	-12.4223	-3.63486	2.44553e-08	3.80722e-07
CDK8	135.882	145.824	133.075	31.6406	15.9105	10.1792	-6.65006	-2.73337	2.50257e-08	3.89092e-07
LMF2	18.211	5.27073	11.7765	80.5396	58.3384	142.509	7.78332	2.96039	2.58709e-08	4.01708e-07
EPC2	103.662	122.984	103.634	23.0113	5.30349	6.78615	-8.08864	-3.0159	2.6546e-08	4.11653e-07
CTIF	22.4135	5.27073	9.42124	86.2925	132.587	74.6476	7.45341	2.8979	2.6994e-08	4.18056e-07
MPG	8.40507	1.75691	7.06593	34.517	37.1244	200.191	14.9194	3.89912	2.7366e-08	4.23266e-07
GMPS	161.097	161.636	190.78	40.2698	42.4279	33.9307	-4.46429	-2.15843	2.77703e-08	4.28836e-07
IDE	203.122	177.448	164.872	51.7755	31.8209	23.7515	-4.83156	-2.27249	2.77982e-08	4.28836e-07
CPTP	1.40084	0	3.53296	34.517	26.5175	122.151	30.2077	4.91684	2.79094e-08	4.29993e-07
CCDC9B	12.6076	22.8398	15.3095	74.7868	121.98	101.792	5.72497	2.51727	2.81858e-08	4.33689e-07
FAM124B	0	7.02764	1.17765	25.8877	121.98	50.8961	23.6842	4.56585	2.82314e-08	4.3383e-07
NDUFS6	8.40507	7.02764	14.1319	57.5283	47.7314	210.371	10.3574	3.37259	2.83293e-08	4.34772e-07
IFT172	113.468	133.525	147.207	25.8877	15.9105	16.9654	-6.39139	-2.67613	2.83749e-08	4.34911e-07
ENTPD6	11.2068	8.78455	10.5989	71.9104	37.1244	81.4338	6.39699	2.67739	2.86751e-08	4.38947e-07
UBR5	1095.46	832.775	831.424	178.338	190.926	54.2892	-6.56631	-2.71508	2.89549e-08	4.4266e-07
ATIC	175.106	180.962	147.207	34.517	10.607	37.3238	-5.47447	-2.45272	2.91184e-08	4.4451e-07
DUSP4	19.6118	35.1382	48.2838	198.473	190.926	142.509	5.05914	2.33889	2.91506e-08	4.4451e-07
MT-ND4L	0	0	0	736.362	1219.8	111.971	2754.74	11.4277	2.93213e-08	4.4654e-07
PKN3	105.063	135.282	155.45	17.2585	10.607	27.1446	-6.81202	-2.76808	2.95783e-08	4.49877e-07
SLC2A4RG	2.80169	0	0	51.7755	31.8209	95.0061	51.3972	5.68362	3.01611e-08	4.58155e-07
COL4A6	5.60338	1.75691	2.35531	66.1576	47.7314	30.5377	13.9395	3.80111	3.03619e-08	4.60617e-07
ASS1	92.4557	126.498	97.7453	2.87642	0	10.1792	-20.5358	-4.36007	3.04295e-08	4.61055e-07
ZKSCAN1	7.00422	3.51382	9.42124	94.9217	121.98	23.7515	11.1938	3.48462	3.07072e-08	4.6467e-07
HNRNPD	437.063	497.206	429.844	77.6632	84.8559	125.544	-4.67636	-2.22539	3.10755e-08	4.69628e-07
PPP1R9B	308.186	339.084	463.996	40.2698	68.9454	101.792	-5.32053	-2.41157	3.11138e-08	4.69628e-07
SUZ12	140.084	173.934	195.491	43.1462	42.4279	10.1792	-5.4013	-2.43331	3.13982e-08	4.73321e-07
JPT2	18.211	12.2984	9.42124	92.0453	106.07	54.2892	6.14998	2.62058	3.16545e-08	4.76581e-07
U2SURP	189.114	219.614	241.419	37.3934	68.9454	23.7515	-5.42487	-2.43959	3.20067e-08	4.80724e-07
SEMA3A	179.308	319.758	346.23	2.87642	0	0	-193.519	-7.59633	3.20106e-08	4.80724e-07
TUBB3	305.384	230.155	268.505	63.2811	26.5175	50.8961	-5.33318	-2.415	3.2315e-08	4.84684e-07
OCIAD2	4.20253	7.02764	8.24358	69.034	21.214	105.185	9.94849	3.31448	3.25962e-08	4.88286e-07
SLC1A5	15.4093	10.5415	16.4872	276.136	90.1594	40.7169	9.45785	3.24151	3.28093e-08	4.9086e-07
TMEM250	12.6076	10.5415	10.5989	63.2811	42.4279	135.723	7.16175	2.84031	3.29698e-08	4.92641e-07
KLF4	407.646	200.288	248.485	37.3934	74.2489	10.1792	-7.34526	-2.87681	3.30241e-08	4.92835e-07
GDF15	0	0	0	655.823	355.334	668.436	2253.09	11.1377	3.30693e-08	4.92891e-07
ALDH3A2	23.8144	19.326	30.619	92.0453	164.408	135.723	4.95917	2.3101	3.31286e-08	4.93156e-07
SLC43A2	4.20253	12.2984	14.1319	74.7868	63.6419	74.6476	6.85635	2.77744	3.33461e-08	4.95774e-07
EXOC4	284.371	281.106	309.723	60.4047	74.2489	54.2892	-4.76045	-2.2511	3.35627e-08	4.98371e-07
EFEMP2	0	1.75691	0	63.2811	42.4279	162.868	124.02	6.95443	3.44089e-08	5.10298e-07
CYFIP1	488.895	567.482	645.355	146.697	68.9454	98.3991	-5.16033	-2.36746	3.46417e-08	5.13111e-07
VPS36	102.262	144.067	143.674	23.0113	26.5175	6.78615	-7.09671	-2.82715	3.47499e-08	5.14073e-07
HSPB1	0	0	0	267.507	212.14	1479.38	2614.31	11.3522	3.57245e-08	5.2718e-07
KIF23	75.6456	186.232	177.826	0	10.607	0	-53.1738	-5.73264	3.57133e-08	5.2718e-07
CLN3	2.80169	1.75691	4.71062	40.2698	31.8209	67.8615	13.6899	3.77504	3.6698e-08	5.40874e-07
CNOT2	155.494	200.288	208.445	46.0227	53.0349	23.7515	-4.70669	-2.23471	3.68765e-08	5.42833e-07
C2CD2	12.6076	5.27073	10.5989	74.7868	90.1594	50.8961	6.94148	2.79524	3.7304e-08	5.48448e-07
DDA1	4.20253	5.27073	2.35531	60.4047	15.9105	95.0061	14.5399	3.86195	3.91343e-08	5.74646e-07
TSSC4	1.40084	1.75691	1.17765	37.3934	26.5175	105.185	34.5738	5.11161	3.95107e-08	5.79458e-07
CLOCK	242.346	200.288	187.247	51.7755	53.0349	10.1792	-5.58551	-2.48169	3.95958e-08	5.7999e-07
SCD5	2.80169	1.75691	1.17765	51.7755	37.1244	37.3238	20.492	4.35699	3.98354e-08	5.82783e-07
TANGO2	11.2068	5.27073	7.06593	57.5283	53.0349	57.6823	6.90983	2.78865	3.99029e-08	5.83053e-07
IFRD1	395.038	249.481	307.368	60.4047	95.4628	30.5377	-5.34432	-2.41801	4.03448e-08	5.88787e-07
PRKCSH	84.0507	79.061	80.0805	253.125	328.816	468.244	4.30076	2.10459	4.04667e-08	5.89841e-07
TRIM65	1.40084	1.75691	1.17765	60.4047	31.8209	44.11	29.1861	4.86721	4.09487e-08	5.96136e-07
FADD	8.40507	5.27073	4.71062	69.034	31.8209	54.2892	8.75509	3.13012	4.11989e-08	5.98416e-07
MED12	264.76	247.724	307.368	69.034	53.0349	30.5377	-5.30802	-2.40817	4.12059e-08	5.98416e-07
ALG12	2.80169	1.75691	1.17765	51.7755	21.214	61.0753	22.7464	4.50757	4.13815e-08	6.00233e-07
ZC3H15	253.553	288.133	249.663	51.7755	74.2489	23.7515	-5.54522	-2.47125	4.18814e-08	6.06745e-07
FTH1	2937.57	2728.48	3847.4	12403.1	11572.2	42291.3	6.96511	2.80015	4.37156e-08	6.32546e-07
IGF2BP1	2.80169	0	0	77.6632	53.0349	33.9307	47.0518	5.55618	4.39047e-08	6.34512e-07
SP3	240.945	302.189	237.886	40.2698	68.9454	3.39307	-7.21692	-2.85138	4.42784e-08	6.39136e-07
MARCHF5	231.139	228.398	233.176	60.4047	42.4279	13.5723	-5.79146	-2.53393	4.46035e-08	6.43048e-07
TAF7	11.2068	17.5691	14.1319	112.18	68.9454	64.4684	5.9198	2.56555	4.49107e-08	6.46693e-07
MSL2	124.675	133.525	118.943	20.1349	31.8209	13.5723	-6.03508	-2.59337	4.54897e-08	6.54034e-07
ZC3H14	158.295	233.669	222.577	31.6406	63.6419	37.3238	-4.9119	-2.29628	4.55305e-08	6.54034e-07
SPRED1	78.4473	93.1162	107.167	8.62925	5.30349	6.78615	-12.5531	-3.64997	4.56197e-08	6.54525e-07
BLOC1S6	2.80169	7.02764	10.5989	71.9104	58.3384	40.7169	7.96216	2.99316	4.67569e-08	6.70032e-07
PREP	151.291	179.205	202.557	34.517	53.0349	37.3238	-4.45914	-2.15677	4.68925e-08	6.71166e-07
UNKL	4.20253	7.02764	2.35531	80.5396	42.4279	33.9307	11.9658	3.58085	4.75692e-08	6.79217e-07
STAG2	546.329	491.935	463.996	103.551	137.891	33.9307	-5.59605	-2.48441	4.75228e-08	6.79217e-07
GPR161	4.20253	3.51382	5.88827	46.0227	63.6419	37.3238	9.55853	3.25679	4.80465e-08	6.8521e-07
DNAJC4	4.20253	0	4.71062	37.3934	21.214	139.116	19.7651	4.30489	4.81516e-08	6.85886e-07
TFPI2	0	0	0	471.732	604.598	458.065	2009.87	10.9729	4.88244e-08	6.94638e-07
DHX32	19.6118	17.5691	16.4872	77.6632	159.105	78.0407	5.53019	2.46733	4.90351e-08	6.96802e-07
COPS3	217.131	177.448	166.049	25.8877	26.5175	61.0753	-4.82167	-2.26953	5.10367e-08	7.2438e-07
SRPK2	172.304	187.989	201.379	46.0227	58.3384	10.1792	-5.17378	-2.37122	5.13977e-08	7.28634e-07
DOP1A	106.464	135.282	83.6135	17.2585	15.9105	6.78615	-7.9604	-2.99284	5.29061e-08	7.49125e-07
CEP164	5.60338	8.78455	11.7765	77.6632	74.2489	40.7169	6.99872	2.80709	5.2978e-08	7.49251e-07
SLC25A12	126.076	96.6301	100.101	17.2585	21.214	10.1792	-6.79673	-2.76484	5.32321e-08	7.5195e-07
MUL1	12.6076	10.5415	10.5989	71.9104	63.6419	61.0753	5.77416	2.52961	5.36687e-08	7.56504e-07
PSMD1	801.283	692.223	731.324	117.933	164.408	156.081	-5.21946	-2.3839	5.36816e-08	7.56504e-07
WASHC2C	22.4135	17.5691	21.1978	117.933	90.1594	84.8268	4.79271	2.26084	5.37571e-08	7.56671e-07
ZDHHC24	11.2068	3.51382	8.24358	54.6519	37.1244	132.33	9.41654	3.2352	5.46108e-08	7.67779e-07
CCN2	320.793	66.7626	114.233	655.823	2731.3	1126.5	8.96629	3.16451	5.51023e-08	7.73774e-07
TXNRD2	12.6076	19.326	8.24358	54.6519	79.5524	128.937	6.65466	2.73436	5.5201e-08	7.74246e-07
ARVCF	0	0	2.35531	34.517	42.4279	98.3991	50.5071	5.65841	5.56403e-08	7.79489e-07
XPC	15.4093	14.0553	14.1319	100.675	47.7314	81.4338	5.54436	2.47102	5.61339e-08	7.8378e-07
NDUFAF3	0	1.75691	5.88827	46.0227	26.5175	71.2546	16.4441	4.0395	5.61443e-08	7.8378e-07
ARMCX2	102.262	138.796	136.608	25.8877	10.607	20.3584	-6.0905	-2.60656	5.60613e-08	7.8378e-07
PPIF	5.60338	3.51382	4.71062	54.6519	31.8209	47.503	9.54887	3.25533	5.76948e-08	8.0448e-07
RAB29	8.40507	7.02764	12.9542	86.2925	58.3384	47.503	6.56395	2.71456	5.81436e-08	8.07897e-07
CSRNP2	1.40084	5.27073	5.88827	57.5283	63.6419	30.5377	11.1004	3.47254	5.80926e-08	8.07897e-07
GGNBP2	312.388	267.05	292.058	74.7868	63.6419	47.503	-4.65087	-2.2175	5.80909e-08	8.07897e-07
MRPL20	4.20253	1.75691	3.53296	37.3934	21.214	122.151	17.6122	4.1385	5.8464e-08	8.10455e-07
TRUB2	8.40507	15.8122	8.24358	48.8991	68.9454	81.4338	6.17474	2.62638	5.84187e-08	8.10455e-07
SH3BGRL3	85.4515	112.442	103.634	609.8	212.14	946.668	5.88123	2.55612	5.89943e-08	8.16855e-07
MT-ND3	0	0	0	342.293	397.762	732.904	1966.09	10.9411	5.982e-08	8.27325e-07
HSPD1	1136.08	843.317	780.785	227.237	127.284	128.937	-5.58501	-2.48156	6.01982e-08	8.31588e-07
OGDH	442.667	335.57	416.89	109.304	74.2489	74.6476	-4.50795	-2.17247	6.07359e-08	8.38043e-07
IQSEC2	89.6541	96.6301	102.456	14.3821	0	0	-15.4298	-3.94765	6.091e-08	8.39471e-07
UBE2W	96.6583	144.067	85.9688	11.5057	21.214	10.1792	-7.94433	-2.98993	6.14169e-08	8.45478e-07
WTAP	191.916	189.746	194.313	46.0227	53.0349	40.7169	-4.18488	-2.06519	6.23236e-08	8.56967e-07
TCTA	1.40084	0	0	71.9104	58.3384	78.0407	99.061	6.63025	6.28854e-08	8.63695e-07
PHF14	144.287	203.802	184.892	14.3821	37.1244	54.2892	-5.18093	-2.37321	6.30986e-08	8.65623e-07
POLA1	116.27	77.304	89.5018	5.75283	5.30349	3.39307	-18.7567	-4.22933	6.50986e-08	8.9203e-07
HHIP	0	0	0	500.496	498.528	396.99	1854.03	10.8564	6.59385e-08	9.02501e-07
TMBIM6	130.279	161.636	141.319	673.081	647.026	576.823	4.41425	2.14217	6.74393e-08	9.2198e-07
DCBLD1	1.40084	5.27073	5.88827	43.1462	95.4628	33.9307	12.344	3.62573	6.98487e-08	9.53824e-07
KANSL2	200.321	149.337	137.786	31.6406	47.7314	10.1792	-5.77271	-2.52925	7.02282e-08	9.57906e-07
TSPAN5	8.40507	14.0553	20.0201	86.2925	68.9454	108.578	6.12007	2.61355	7.10767e-08	9.68132e-07
PDLIM4	8.40507	7.02764	5.88827	63.2811	21.214	149.295	10.8592	3.44085	7.11407e-08	9.68132e-07
HNRNPA1P48	81.249	107.172	93.0347	0	5.30349	10.1792	-18.3563	-4.1982	7.15321e-08	9.72346e-07
ANXA3	142.886	137.039	110.7	25.8877	15.9105	20.3584	-5.88935	-2.55811	7.23658e-08	9.82556e-07
REXO4	4.20253	3.51382	8.24358	40.2698	47.7314	74.6476	9.28982	3.21565	7.27063e-08	9.86053e-07
WDR12	105.063	112.442	135.43	17.2585	26.5175	20.3584	-5.75211	-2.52409	7.28062e-08	9.86284e-07
BEST1	1.40084	0	0	69.034	26.5175	149.295	115.135	6.84719	7.34622e-08	9.94038e-07
TOX2	1.40084	0	1.17765	40.2698	47.7314	61.0753	41.7559	5.38391	7.39311e-08	9.99246e-07
RGS5	0	0	0	509.126	615.205	271.446	1854.02	10.8564	7.41891e-08	1.00159e-06
SPTBN5	1.40084	0	0	60.4047	79.5524	71.2546	95.7879	6.58177	7.59128e-08	1.0237e-06
POM121C	15.4093	12.2984	17.6648	97.7981	79.5524	64.4684	5.2192	2.38383	7.61075e-08	1.02517e-06
VPS54	107.865	119.47	109.522	14.3821	31.8209	13.5723	-6.10888	-2.61091	7.67729e-08	1.03179e-06
VKORC1	1.40084	0	0	40.2698	53.0349	149.295	113.186	6.82255	7.67631e-08	1.03179e-06
TTC7B	169.502	189.746	191.958	54.6519	42.4279	27.1446	-4.34419	-2.11909	7.69019e-08	1.03236e-06
HMGCS1	247.949	137.039	134.253	48.8991	15.9105	10.1792	-6.50878	-2.70239	7.71322e-08	1.03428e-06
AKT1S1	23.8144	26.3537	38.8626	161.079	100.766	118.758	4.29376	2.10224	7.75679e-08	1.03896e-06
ANAPC5	557.536	639.515	653.598	112.18	127.284	159.474	-4.65054	-2.2174	7.85377e-08	1.05076e-06
PYGB	33.6203	31.6244	35.3296	215.731	74.2489	186.619	4.82913	2.27176	7.86795e-08	1.05148e-06
CD99L2	12.6076	15.8122	10.5989	51.7755	90.1594	91.613	5.81755	2.54041	8.00286e-08	1.0683e-06
SOCS3	8.40507	5.27073	10.5989	20.1349	328.816	54.2892	15.8023	3.98206	8.19156e-08	1.09227e-06
ADCY4	175.106	151.094	167.227	20.1349	42.4279	47.503	-4.71048	-2.23587	8.26343e-08	1.10062e-06
TEPSIN	4.20253	1.75691	1.17765	46.0227	26.5175	44.11	15.8595	3.98727	8.46296e-08	1.12468e-06
P4HB	462.279	474.366	502.859	2882.17	1532.71	2982.51	5.14851	2.36415	8.46141e-08	1.12468e-06
TBCD	21.0127	22.8398	15.3095	83.4161	68.9454	152.688	5.27735	2.39981	8.51488e-08	1.13031e-06
HDGFL3	4.20253	0	2.35531	51.7755	53.0349	27.1446	16.7972	4.07014	8.58844e-08	1.13881e-06
NMRK1	0	1.75691	3.53296	25.8877	58.3384	61.0753	22.3053	4.47932	8.63059e-08	1.14312e-06
SMARCAD1	126.076	105.415	131.897	23.0113	37.1244	3.39307	-6.30011	-2.65538	8.66251e-08	1.14607e-06
SELENON	44.827	49.1935	70.6593	333.664	153.801	217.157	4.30443	2.10582	8.73077e-08	1.15382e-06
TLE1	15.4093	15.8122	12.9542	54.6519	95.4628	95.0061	5.31942	2.41127	8.7533e-08	1.15551e-06
SEMA6D	78.4473	131.768	166.049	5.75283	0	0	-47.6577	-5.57464	8.80669e-08	1.16127e-06
GIMAP8	0	0	2.35531	23.0113	79.5524	67.8615	47.5644	5.57181	8.96317e-08	1.1806e-06
HPS1	32.2194	22.8398	21.1978	123.686	74.2489	149.295	4.71466	2.23715	9.08251e-08	1.19499e-06
DLC1	7.00422	14.0553	8.24358	92.0453	106.07	33.9307	7.81411	2.96608	9.19713e-08	1.20874e-06
SP140L	1.40084	1.75691	1.17765	31.6406	63.6419	40.7169	25.5932	4.67769	9.26129e-08	1.21583e-06
TMEM230	4.20253	5.27073	8.24358	51.7755	79.5524	37.3238	8.39053	3.06876	9.30002e-08	1.21956e-06
PSMD5	142.886	151.094	183.714	25.8877	47.7314	30.5377	-4.90183	-2.29332	9.45201e-08	1.23754e-06
SEH1L	105.063	94.8731	82.4358	8.62925	15.9105	3.39307	-10.7797	-3.43025	9.45793e-08	1.23754e-06
TRAPPC11	127.477	133.525	109.522	23.0113	31.8209	10.1792	-5.90211	-2.56123	9.53405e-08	1.24613e-06
UBL5	8.40507	12.2984	16.4872	83.4161	26.5175	288.411	10.5564	3.40005	9.59326e-08	1.25249e-06
RGS10	1.40084	0	2.35531	23.0113	42.4279	88.2199	31.5807	4.98097	9.66597e-08	1.25922e-06
VPS35	375.426	395.305	452.219	77.6632	143.194	61.0753	-4.67203	-2.22405	9.66123e-08	1.25922e-06
MFAP1	186.312	149.337	146.029	20.1349	47.7314	33.9307	-5.08217	-2.34544	9.82574e-08	1.27864e-06
SENP1	96.6583	86.0886	88.3241	5.75283	0	6.78615	-17.8883	-4.16095	9.91805e-08	1.28924e-06
COMMD1	106.464	142.31	127.187	23.0113	10.607	27.1446	-5.68513	-2.50719	9.92934e-08	1.2893e-06
CCDC137	1.40084	3.51382	4.71062	37.3934	47.7314	47.503	12.3398	3.62525	9.94097e-08	1.2894e-06
BZW1	909.148	897.781	938.591	238.743	159.105	81.4338	-5.67832	-2.50546	1.00099e-07	1.2965e-06
MCAM	308.186	277.592	273.216	1699.96	1023.57	1625.28	5.08826	2.34717	1.00175e-07	1.2965e-06
TBC1D9	0	1.75691	0	106.427	90.1594	27.1446	102.28	6.67637	1.0061e-07	1.30072e-06
ZBTB20	145.688	100.144	110.7	23.0113	31.8209	0	-6.95319	-2.79767	1.01062e-07	1.30514e-06
LDHA	78.4473	63.2488	62.4157	483.238	196.229	281.625	4.75712	2.25009	1.01233e-07	1.30593e-06
GABARAPL1	28.0169	38.652	30.619	207.102	132.587	88.2199	4.45855	2.15657	1.01537e-07	1.30844e-06
USP15	184.911	245.967	231.998	48.8991	63.6419	23.7515	-5.04786	-2.33567	1.04265e-07	1.34213e-06
LAMP1	156.895	180.962	147.207	730.61	604.598	977.205	4.81574	2.26776	1.04407e-07	1.34251e-06
POLD4	5.60338	0	4.71062	40.2698	21.214	118.758	15.8392	3.98543	1.0494e-07	1.3479e-06
GNS	144.287	105.415	135.43	624.182	684.15	390.203	4.36027	2.12442	1.06189e-07	1.36247e-06
NDUFAF8	5.60338	0	1.17765	43.1462	10.607	135.723	25.0185	4.64492	1.07063e-07	1.3722e-06
BOK	0	1.75691	0	40.2698	53.0349	128.937	102.424	6.67841	1.08758e-07	1.39243e-06
LRP6	179.308	163.393	140.141	43.1462	26.5175	20.3584	-5.08064	-2.34501	1.09478e-07	1.40015e-06
FLT4	141.485	121.227	137.786	25.8877	15.9105	30.5377	-5.27934	-2.40036	1.09662e-07	1.40099e-06
MAPKAPK5	98.0591	79.061	98.923	17.2585	5.30349	3.39307	-9.45873	-3.24165	1.11008e-07	1.41667e-06
TINF2	1.40084	0	1.17765	48.8991	31.8209	50.8961	38.6949	5.27407	1.12093e-07	1.42898e-06
MYL6B	1.40084	0	0	46.0227	26.5175	186.619	121.114	6.92022	1.13756e-07	1.44863e-06
ISG15	0	1.75691	0	37.3934	26.5175	203.584	120.615	6.91427	1.13926e-07	1.44924e-06
PEX26	2.80169	1.75691	4.71062	46.0227	53.0349	33.9307	12.3399	3.62526	1.14333e-07	1.45286e-06
PITPNA	841.908	885.483	936.235	201.349	164.408	162.868	-4.95999	-2.31034	1.16268e-07	1.47587e-06
ARF6	271.764	316.244	317.967	77.6632	79.5524	40.7169	-4.63156	-2.2115	1.16435e-07	1.47641e-06
MSI2	168.101	124.741	120.121	17.2585	37.1244	20.3584	-5.92934	-2.56787	1.16693e-07	1.47811e-06
UBA3	144.287	209.072	179.004	17.2585	74.2489	16.9654	-5.49582	-2.45834	1.17729e-07	1.48806e-06
ABCE1	336.203	433.957	378.027	54.6519	132.587	23.7515	-5.68456	-2.50705	1.17668e-07	1.48806e-06
PAXBP1	110.667	110.685	107.167	20.1349	26.5175	13.5723	-5.61214	-2.48855	1.18238e-07	1.49291e-06
PMPCB	142.886	152.851	160.161	23.0113	42.4279	27.1446	-5.23445	-2.38804	1.18979e-07	1.50068e-06
ORC5	93.8566	107.172	90.6794	2.87642	15.9105	16.9654	-8.69393	-3.12001	1.19452e-07	1.50505e-06
USP34	727.038	623.703	700.705	140.944	175.015	44.11	-5.78521	-2.53237	1.20891e-07	1.52156e-06
SLC39A13	30.8186	29.8675	31.7967	158.203	63.6419	200.191	4.64871	2.21683	1.21141e-07	1.5231e-06
PRKAR1B	2.80169	3.51382	2.35531	20.1349	53.0349	74.6476	15.8273	3.98435	1.21642e-07	1.52779e-06
FBXO11	291.376	300.432	283.815	74.7868	74.2489	20.3584	-5.23558	-2.38835	1.22366e-07	1.53525e-06
MON2	144.287	126.498	131.897	28.7642	37.1244	3.39307	-6.1489	-2.62033	1.23243e-07	1.54463e-06
RPS4Y1	0	0	0	264.63	201.533	858.448	1769.31	10.789	1.23422e-07	1.54524e-06
HNRNPM	589.756	797.637	865.576	161.079	63.6419	166.261	-5.55946	-2.47494	1.25795e-07	1.5733e-06
CUL9	7.00422	3.51382	4.71062	37.3934	53.0349	50.8961	8.50603	3.08849	1.26428e-07	1.57956e-06
RDH11	9.80591	10.5415	3.53296	40.2698	58.3384	74.6476	7.32947	2.87371	1.27557e-07	1.59198e-06
ICMT	21.0127	15.8122	10.5989	77.6632	116.677	81.4338	5.60617	2.48702	1.28109e-07	1.5972e-06
DPP8	133.08	175.691	151.917	25.8877	47.7314	13.5723	-5.69561	-2.50985	1.29244e-07	1.60967e-06
EIF3F	96.6583	98.387	115.41	385.44	296.996	773.621	4.6965	2.23158	1.30427e-07	1.6227e-06
STX3	46.2279	28.1106	30.619	149.574	100.766	159.474	4.01166	2.0042	1.31014e-07	1.62829e-06
DLD	203.122	187.989	187.247	57.5283	47.7314	10.1792	-4.97953	-2.31601	1.336e-07	1.65871e-06
LDHB	0	0	0	385.44	238.657	580.216	1613.99	10.6564	1.34836e-07	1.67231e-06
B4GALT6	105.063	89.6024	76.5476	8.62925	5.30349	0	-17.7422	-4.14911	1.36312e-07	1.68885e-06
ATR	112.068	107.172	116.588	17.2585	37.1244	10.1792	-5.77535	-2.52991	1.37044e-07	1.69615e-06
UBA1	1357.42	1363.36	1410.83	293.394	243.961	288.411	-4.91851	-2.29822	1.37279e-07	1.69729e-06
SHPRH	93.8566	79.061	109.522	5.75283	26.5175	3.39307	-9.71117	-3.27964	1.38364e-07	1.70893e-06
BCAT1	15.4093	29.8675	27.0861	135.192	127.284	84.8268	4.78437	2.25833	1.38564e-07	1.70963e-06
PRMT1	400.642	372.465	385.093	89.1689	26.5175	105.185	-4.79145	-2.26046	1.40724e-07	1.73448e-06
DBI	14.0084	12.2984	8.24358	80.5396	31.8209	173.047	8.3108	3.05499	1.41573e-07	1.74313e-06
ARPC3	81.249	82.5748	73.0146	253.125	270.478	512.354	4.39017	2.13428	1.42001e-07	1.7466e-06
EWSR1	795.68	931.162	913.86	166.832	90.1594	213.764	-5.34526	-2.41826	1.43605e-07	1.76451e-06
H3-3B	1270.57	934.676	1082.26	204.226	153.801	268.053	-5.1507	-2.36477	1.43958e-07	1.76701e-06
DCAF1	169.502	121.227	149.562	28.7642	37.1244	16.9654	-5.54192	-2.47039	1.44584e-07	1.77287e-06
ANKRD13D	4.20253	3.51382	2.35531	34.517	21.214	91.613	14.1861	3.82641	1.44878e-07	1.77464e-06
CASD1	84.0507	114.199	90.6794	0	10.607	3.39307	-24.5545	-4.61791	1.46497e-07	1.79262e-06
SOX7	7.00422	0	1.17765	25.8877	53.0349	67.8615	15.877	3.98887	1.46845e-07	1.79504e-06
ITPRIP	19.6118	15.8122	14.1319	80.5396	143.194	67.8615	5.54962	2.47239	1.4776e-07	1.80438e-06
NFATC3	211.528	237.183	255.551	25.8877	53.0349	64.4684	-5.12425	-2.35734	1.48182e-07	1.80767e-06
MEF2A	369.823	502.476	463.996	103.551	132.587	81.4338	-4.31003	-2.1077	1.48872e-07	1.81422e-06
NOC2L	9.80591	8.78455	18.8425	60.4047	53.0349	122.151	6.09504	2.60764	1.50861e-07	1.83634e-06
FAF1	165.3	151.094	166.049	23.0113	21.214	50.8961	-4.94505	-2.30598	1.51099e-07	1.83634e-06
FAM89B	21.0127	5.27073	9.42124	80.5396	31.8209	257.874	10.1793	3.34756	1.5115e-07	1.83634e-06
ST6GALNAC6	5.60338	7.02764	3.53296	46.0227	26.5175	67.8615	9.16433	3.19603	1.51667e-07	1.84075e-06
NLK	91.0549	73.7902	101.278	11.5057	15.9105	3.39307	-9.16759	-3.19654	1.55777e-07	1.88869e-06
MRPS35	4.20253	1.75691	3.53296	40.2698	26.5175	47.503	11.3113	3.4997	1.56599e-07	1.89672e-06
ITGB3	82.6498	86.0886	78.9029	537.89	328.816	234.122	4.4687	2.15986	1.57558e-07	1.9064e-06
INPP5K	8.40507	3.51382	11.7765	66.1576	26.5175	118.758	8.58425	3.10169	1.6212e-07	1.9596e-06
NCL	1793.08	1565.41	1578.06	356.676	334.12	305.377	-4.9398	-2.30445	1.6242e-07	1.96124e-06
HSPA1L	201.722	158.122	217.866	2.87642	0	0	-133.035	-7.05567	1.63553e-07	1.97292e-06
PRC1	58.8355	122.984	97.7453	8.62925	5.30349	0	-18.4159	-4.20288	1.63849e-07	1.97449e-06
DENND11	1.40084	1.75691	4.71062	43.1462	90.1594	20.3584	16.4741	4.04213	1.67406e-07	2.01531e-06
PRKX	0	5.27073	2.35531	54.6519	47.7314	23.7515	16.2314	4.02072	1.6885e-07	2.03064e-06
SPOP	201.722	200.288	237.886	51.7755	53.0349	44.11	-4.34753	-2.1202	1.69638e-07	2.03805e-06
DNAJC5	53.2321	50.9504	47.1062	215.731	164.408	159.474	3.65138	1.86844	1.70046e-07	2.0409e-06
RSRC2	165.3	173.934	147.207	34.517	47.7314	27.1446	-4.57253	-2.19299	1.70712e-07	2.04682e-06
PCM1	303.983	268.807	289.703	80.5396	53.0349	54.2892	-4.43127	-2.14772	1.71345e-07	2.05234e-06
HMGCR	180.709	112.442	103.634	28.7642	21.214	13.5723	-6.07935	-2.60392	1.73622e-07	2.07753e-06
YIPF6	1.40084	1.75691	3.53296	46.0227	26.5175	37.3238	14.9344	3.90057	1.74397e-07	2.0847e-06
SH3BP5L	9.80591	3.51382	2.35531	74.7868	15.9105	78.0407	10.6832	3.41727	1.76016e-07	2.10194e-06
RIC8A	47.6287	45.6797	35.3296	161.079	132.587	200.191	3.96956	1.98898	1.77673e-07	2.1196e-06
ANXA11	54.6329	52.7073	58.8827	175.461	148.498	305.377	3.80828	1.92914	1.78588e-07	2.12838e-06
TRIM3	233.941	144.067	164.872	40.2698	26.5175	50.8961	-4.44515	-2.15223	1.80316e-07	2.14683e-06
CEP104	8.40507	7.02764	14.1319	77.6632	47.7314	54.2892	5.94416	2.57147	1.82483e-07	2.17045e-06
ENAH	1.40084	0	2.35531	74.7868	74.2489	10.1792	32.8317	5.03702	1.83939e-07	2.18122e-06
SGMS1	135.882	117.713	141.319	20.1349	47.7314	0	-6.82671	-2.77119	1.83852e-07	2.18122e-06
AAMDC	4.20253	0	7.06593	37.3934	31.8209	88.2199	12.3549	3.62701	1.83795e-07	2.18122e-06
TOR1A	22.4135	10.5415	16.4872	94.9217	84.8559	88.2199	5.28301	2.40136	1.85215e-07	2.19417e-06
ACTR3	981.992	992.654	1058.71	230.113	243.961	98.3991	-5.35172	-2.42	1.86386e-07	2.20584e-06
HTRA1	0	0	0	235.866	334.12	536.106	1474.7	10.5262	1.89193e-07	2.23684e-06
MEMO1	158.295	149.337	158.983	31.6406	15.9105	40.7169	-4.95795	-2.30974	1.91308e-07	2.25961e-06
KCTD21	4.20253	1.75691	7.06593	57.5283	31.8209	40.7169	9.30663	3.21826	1.92476e-07	2.27114e-06
CCZ1	1.40084	12.2984	11.7765	28.7642	111.373	115.365	9.71066	3.27957	1.93291e-07	2.27849e-06
TOB2	16.8101	15.8122	16.4872	94.9217	79.5524	71.2546	4.99688	2.32103	1.93635e-07	2.2803e-06
IRAK1	51.8312	33.3813	48.2838	227.237	84.8559	295.197	4.57038	2.19232	1.9434e-07	2.28633e-06
PKN2	135.882	165.15	146.029	31.6406	37.1244	0	-6.75394	-2.75573	1.97789e-07	2.32159e-06
PCDHGC3	261.958	375.979	360.362	25.8877	84.8559	91.613	-5.07803	-2.34427	1.97923e-07	2.32159e-06
TXNRD1	418.853	268.807	362.718	2908.06	3097.24	705.759	6.37988	2.67353	1.97853e-07	2.32159e-06
NDUFC1	2.80169	1.75691	4.71062	28.7642	42.4279	57.6823	12.0141	3.58666	1.98494e-07	2.326e-06
BRPF1	156.895	151.094	131.897	34.517	31.8209	13.5723	-5.45207	-2.4468	2.00942e-07	2.35236e-06
B3GALT6	1.40084	1.75691	3.53296	25.8877	21.214	118.758	22.0526	4.46288	2.02852e-07	2.37239e-06
PDLIM1	267.561	298.675	270.861	23.0113	47.7314	88.2199	-5.33667	-2.41594	2.03199e-07	2.37411e-06
KLHL36	4.20253	3.51382	8.24358	54.6519	63.6419	33.9307	8.44224	3.07763	2.04368e-07	2.38542e-06
DMAC2	4.20253	5.27073	3.53296	48.8991	15.9105	74.6476	10.8848	3.44424	2.07101e-07	2.41496e-06
HIPK2	37.8228	28.1106	38.8626	264.63	265.175	64.4684	5.59123	2.48316	2.08543e-07	2.42939e-06
RLF	91.0549	122.984	110.7	20.1349	31.8209	3.39307	-6.29275	-2.65369	2.09839e-07	2.4421e-06
ACLY	1294.38	934.676	926.814	267.507	206.836	128.937	-5.2057	-2.38009	2.10518e-07	2.4476e-06
UCHL5	79.8481	98.387	80.0805	8.62925	10.607	6.78615	-9.80989	-3.29424	2.13407e-07	2.47878e-06
MID1	8.40507	12.2984	7.06593	77.6632	42.4279	47.503	6.45874	2.69125	2.14224e-07	2.48583e-06
SMC5	114.869	108.928	117.765	25.8877	26.5175	13.5723	-5.22928	-2.38661	2.216e-07	2.56892e-06
E2F7	21.0127	19.326	10.5989	247.372	153.801	23.7515	8.29511	3.05226	2.24462e-07	2.59956e-06
HSPE1-MOB4	85.4515	86.0886	89.5018	8.62925	21.214	0	-10.0685	-3.33178	2.25183e-07	2.60538e-06
UNC119	7.00422	8.78455	2.35531	60.4047	21.214	81.4338	9.45058	3.2404	2.25804e-07	2.61003e-06
FAM43A	98.0591	59.7349	63.5934	207.102	413.672	380.024	4.45711	2.15611	2.3003e-07	2.65629e-06
TRA2B	285.772	267.05	240.242	77.6632	42.4279	13.5723	-5.7359	-2.52002	2.3249e-07	2.6821e-06
CDC42EP2	33.6203	33.3813	52.9945	135.192	164.408	230.729	4.32194	2.11168	2.3285e-07	2.68364e-06
NDUFS1	340.405	302.189	333.276	92.0453	84.8559	54.2892	-4.2352	-2.08243	2.33955e-07	2.69377e-06
TPX2	49.0296	135.282	101.278	8.62925	0	3.39307	-19.1772	-4.26132	2.3647e-07	2.72009e-06
MGAT1	56.0338	35.1382	42.3956	181.214	132.587	223.943	4.07329	2.02619	2.36923e-07	2.72267e-06
ACTN4	1229.94	1261.46	1402.59	316.406	265.175	220.55	-4.81139	-2.26646	2.40699e-07	2.76339e-06
HIVEP2	114.869	131.768	94.2124	25.8877	26.5175	6.78615	-5.74944	-2.52342	2.41106e-07	2.7654e-06
CSTB	0	0	0	385.44	106.07	624.326	1492.73	10.5437	2.42395e-07	2.7775e-06
SMC3	246.549	268.807	297.947	31.6406	100.766	16.9654	-5.85213	-2.54896	2.46149e-07	2.8178e-06
CLEC14A	0	0	0	204.226	233.354	637.898	1436.49	10.4883	2.46394e-07	2.8179e-06
AAMP	441.266	379.493	349.763	109.304	47.7314	98.3991	-4.28939	-2.10077	2.49325e-07	2.84868e-06
NXN	336.203	340.841	355.652	25.8877	37.1244	118.758	-5.60653	-2.48711	2.49852e-07	2.85196e-06
PHIP	175.106	170.42	151.917	31.6406	68.9454	10.1792	-5.0331	-2.33145	2.51626e-07	2.86812e-06
LYL1	2.80169	8.78455	7.06593	31.6406	31.8209	135.723	10.5109	3.39382	2.5175e-07	2.86812e-06
PACS2	43.4262	31.6244	37.6849	117.933	137.891	200.191	3.99344	1.99763	2.59072e-07	2.94871e-06
CDC42EP4	0	1.75691	1.17765	57.5283	26.5175	37.3238	36.656	5.19598	2.61281e-07	2.97101e-06
SDF4	74.2448	80.8179	51.8168	264.63	190.926	525.926	4.78362	2.2581	2.65796e-07	3.01946e-06
PTX3	0	0	0	750.744	212.14	145.902	1482.78	10.5341	2.68385e-07	3.04016e-06
SMIM7	9.80591	8.78455	9.42124	54.6519	37.1244	78.0407	6.14804	2.62013	2.68074e-07	3.04016e-06
PRMT2	30.8186	21.0829	30.619	115.057	95.4628	128.937	4.07838	2.028	2.68252e-07	3.04016e-06
SLC30A9	162.498	131.768	155.45	34.517	42.4279	13.5723	-5.20081	-2.37874	2.71918e-07	3.07725e-06
SLMAP	154.093	131.768	158.983	40.2698	21.214	20.3584	-5.15489	-2.36594	2.72389e-07	3.07965e-06
DDX3X	1094.06	1337.01	1145.86	195.596	302.299	44.11	-6.65348	-2.73411	2.7279e-07	3.08126e-06
TMCO3	16.8101	19.326	17.6648	123.686	79.5524	64.4684	5.07667	2.34388	2.73245e-07	3.08347e-06
GSTM3	9.80591	3.51382	5.88827	31.6406	42.4279	115.365	9.45155	3.24055	2.75375e-07	3.10455e-06
PARK7	26.616	19.326	21.1978	71.9104	84.8559	240.908	5.88963	2.55818	2.77051e-07	3.1205e-06
EPB41L2	252.152	252.995	327.388	77.6632	63.6419	27.1446	-4.92404	-2.29984	2.81961e-07	3.17279e-06
UACA	19.6118	22.8398	35.3296	63.2811	180.319	169.654	5.13826	2.36128	2.84167e-07	3.1946e-06
CD109	141.485	101.901	102.456	549.395	1219.8	257.874	5.82602	2.54251	2.8617e-07	3.21407e-06
BAD	15.4093	1.75691	8.24358	57.5283	31.8209	200.191	11.0046	3.46003	2.87566e-07	3.22671e-06
IRGQ	5.60338	1.75691	3.53296	43.1462	26.5175	54.2892	10.8868	3.44451	2.89078e-07	3.24062e-06
RPP25	1.40084	0	0	25.8877	79.5524	95.0061	91.9224	6.52235	2.9059e-07	3.2545e-06
TMEM63B	154.093	182.719	231.998	46.0227	47.7314	47.503	-4.0396	-2.01421	2.90937e-07	3.25532e-06
TEX2	558.937	217.857	210.8	48.8991	84.8559	47.503	-5.55511	-2.47381	2.91253e-07	3.25579e-06
NVL	103.662	105.415	74.1922	8.62925	10.607	16.9654	-7.59865	-2.92574	2.91635e-07	3.257e-06
SLC66A1	1.40084	0	1.17765	23.0113	42.4279	74.6476	39.5709	5.30637	2.93031e-07	3.26953e-06
TRIP12	1424.66	1361.61	1457.94	293.394	376.548	122.151	-5.40936	-2.43546	2.98287e-07	3.32505e-06
BACE1	30.8186	7.02764	9.42124	109.304	116.677	74.6476	6.19181	2.63036	3.03636e-07	3.38151e-06
MTSS1	180.709	279.349	264.972	54.6519	68.9454	23.7515	-5.0688	-2.34164	3.04763e-07	3.39088e-06
IFI27	0	0	0	189.843	175.015	668.436	1380.68	10.4312	3.07953e-07	3.42317e-06
KDM4B	9.80591	15.8122	8.24358	74.7868	47.7314	54.2892	5.57926	2.48007	3.12636e-07	3.47198e-06
GBA2	14.0084	1.75691	9.42124	63.2811	58.3384	50.8961	6.33526	2.6634	3.13173e-07	3.4747e-06
UROS	2.80169	3.51382	2.35531	40.2698	10.607	108.578	17.6	4.1375	3.21583e-07	3.56469e-06
UBE2B	189.114	219.614	186.069	54.6519	58.3384	33.9307	-4.06048	-2.02165	3.22215e-07	3.56836e-06
BAIAP2	103.662	65.0057	115.41	20.1349	5.30349	3.39307	-8.75131	-3.1295	3.24333e-07	3.58848e-06
PHF6	110.667	112.442	97.7453	23.0113	31.8209	0	-6.21238	-2.63515	3.26134e-07	3.60506e-06
HSPA14	100.861	91.3593	71.8369	5.75283	21.214	6.78615	-8.81762	-3.14039	3.3148e-07	3.66075e-06
RTCB	386.633	360.167	383.915	92.0453	79.5524	111.971	-3.92119	-1.97129	3.36037e-07	3.70763e-06
RAC3	4.20253	0	2.35531	23.0113	31.8209	74.6476	17.0235	4.08946	3.38196e-07	3.72799e-06
MZT2A	1.40084	1.75691	0	31.6406	26.5175	74.6476	37.8571	5.24249	3.39583e-07	3.73981e-06
RARG	67.2405	89.6024	104.811	5.75283	21.214	6.78615	-8.83045	-3.14249	3.4057e-07	3.74722e-06
SON	1231.34	1386.2	1297.78	307.776	296.996	81.4338	-5.72178	-2.51646	3.41803e-07	3.75731e-06
CERCAM	1.40084	0	0	43.1462	37.1244	105.185	87.3898	6.44939	3.42681e-07	3.76348e-06
TGM2	89.6541	35.1382	43.5732	201.349	228.05	434.313	5.10607	2.35221	3.45112e-07	3.78668e-06
CYFIP2	1.40084	1.75691	3.53296	20.1349	37.1244	78.0407	17.6656	4.14287	3.48741e-07	3.82297e-06
IL10RB	2.80169	0	0	17.2585	68.9454	61.0753	40.4182	5.33693	3.57128e-07	3.91131e-06
ORAI2	21.0127	26.3537	31.7967	89.1689	116.677	142.509	4.26276	2.09179	3.62362e-07	3.96498e-06
PSMB8	0	1.75691	2.35531	37.3934	15.9105	81.4338	28.12	4.81353	3.65055e-07	3.99077e-06
H2AZ1	347.409	592.079	435.732	120.809	68.9454	122.151	-4.26936	-2.09402	3.67855e-07	4.01769e-06
PLK1	47.6287	172.177	124.831	0	0	6.78615	-43.1649	-5.43179	3.69857e-07	4.03585e-06
SACM1L	147.089	166.906	144.852	46.0227	15.9105	3.39307	-6.24627	-2.643	3.70689e-07	4.04123e-06
IDH2	0	1.75691	0	46.0227	15.9105	142.509	93.2025	6.5423	3.71888e-07	4.05058e-06
C1orf216	12.6076	5.27073	2.35531	43.1462	37.1244	91.613	8.45031	3.079	3.7256e-07	4.05419e-06
SIAE	16.8101	10.5415	10.5989	63.2811	63.6419	74.6476	5.23905	2.38931	3.7778e-07	4.10724e-06
CGNL1	400.642	437.471	534.655	92.0453	164.408	81.4338	-4.27804	-2.09695	3.79414e-07	4.12124e-06
COLEC12	1.40084	0	1.17765	14.3821	106.07	47.503	46.6482	5.54375	3.80687e-07	4.13129e-06
MTG1	0	7.02764	0	34.517	26.5175	57.6823	18.8926	4.23975	3.82131e-07	4.14318e-06
YJU2B	0	0	3.53296	43.1462	15.9105	61.0753	25.7585	4.68698	3.83305e-07	4.15212e-06
TBL2	1.40084	5.27073	8.24358	80.5396	42.4279	30.5377	9.8344	3.29784	3.92216e-07	4.24479e-06
SNRNP200	743.848	901.295	842.023	212.855	175.015	111.971	-4.93565	-2.30324	3.94838e-07	4.26928e-06
AAAS	110.667	103.658	134.253	23.0113	21.214	27.1446	-4.86182	-2.2815	3.9599e-07	4.27784e-06
TLK1	163.899	138.796	149.562	46.0227	21.214	10.1792	-5.43182	-2.44144	3.98506e-07	4.30112e-06
PPP2R5A	165.3	210.829	234.353	48.8991	68.9454	33.9307	-4.19384	-2.06827	4.0121e-07	4.32246e-06
FDXR	2.80169	5.27073	11.7765	31.6406	37.1244	166.261	11.297	3.49786	4.01037e-07	4.32246e-06
VPS13B	163.899	168.663	161.339	31.6406	68.9454	6.78615	-5.20752	-2.3806	4.03529e-07	4.34351e-06
PPP1R12A	197.519	168.663	163.694	46.0227	63.6419	6.78615	-4.85421	-2.27924	4.10989e-07	4.4198e-06
VIRMA	148.49	173.934	174.293	46.0227	58.3384	27.1446	-3.91057	-1.96738	4.11599e-07	4.4209e-06
ARHGEF40	78.4473	79.061	90.6794	0	10.607	3.39307	-21.6136	-4.43387	4.11834e-07	4.4209e-06
IGHMBP2	2.80169	3.51382	5.88827	37.3934	31.8209	47.503	8.94043	3.16034	4.17667e-07	4.47947e-06
INTS4	126.076	122.984	133.075	17.2585	31.8209	33.9307	-4.7945	-2.26138	4.24357e-07	4.54712e-06
DIP2A	142.886	175.691	191.958	57.5283	42.4279	16.9654	-4.28595	-2.09962	4.29909e-07	4.60246e-06
MATR3_1	591.156	570.996	612.38	143.821	185.622	81.4338	-4.51227	-2.17385	4.33069e-07	4.63212e-06
LTBP2	0	0	0	348.046	307.602	190.012	1127.14	10.1385	4.35288e-07	4.65168e-06
TXLNA	47.6287	57.978	62.4157	195.596	196.229	162.868	3.26278	1.7061	4.37085e-07	4.6625e-06
NRBP2	11.2068	3.51382	2.35531	46.0227	53.0349	40.7169	7.82484	2.96806	4.3689e-07	4.6625e-06
SMCHD1	186.312	159.879	141.319	40.2698	53.0349	10.1792	-4.93975	-2.30444	4.38025e-07	4.66834e-06
PA2G4	571.545	433.957	448.686	92.0453	79.5524	159.474	-4.30577	-2.10627	4.39093e-07	4.67554e-06
RHOT1	138.684	159.879	143.674	23.0113	53.0349	20.3584	-5.02899	-2.33027	4.40711e-07	4.68856e-06
VHL	7.00422	5.27073	9.42124	31.6406	63.6419	74.6476	7.17755	2.84349	4.4321e-07	4.71094e-06
RIPK1	11.2068	17.5691	8.24358	63.2811	68.9454	54.2892	5.14571	2.36337	4.49057e-07	4.76882e-06
BRIX1	110.667	96.6301	71.8369	14.3821	10.607	10.1792	-7.53823	-2.91422	4.49476e-07	4.76901e-06
SEC16A	44.827	43.9228	60.0604	258.877	185.622	122.151	3.78874	1.92172	4.54682e-07	4.81995e-06
WFS1	57.4346	43.9228	68.304	143.821	196.229	325.735	3.87976	1.95597	4.62943e-07	4.89879e-06
RAB28	81.249	70.2764	96.5677	0	15.9105	0	-21.8397	-4.44888	4.6284e-07	4.89879e-06
IRAK2	0	1.75691	5.88827	54.6519	58.3384	20.3584	14.6709	3.87488	4.74726e-07	5.01901e-06
TNFAIP8L3	0	0	0	284.765	201.533	305.377	1081.69	10.0791	4.83371e-07	5.10588e-06
NBEA	92.4557	72.0333	88.3241	5.75283	26.5175	3.39307	-8.64765	-3.11231	4.89183e-07	5.16268e-06
TERF2IP	19.6118	7.02764	10.5989	80.5396	116.677	40.7169	6.04845	2.59657	4.93246e-07	5.20094e-06
YAP1	99.46	108.928	133.075	31.6406	26.5175	3.39307	-5.55398	-2.47352	4.94206e-07	5.20449e-06
TMUB2	19.6118	17.5691	12.9542	71.9104	58.3384	84.8268	4.41827	2.14348	4.94457e-07	5.20449e-06
NFATC2IP	1.40084	5.27073	2.35531	31.6406	37.1244	40.7169	11.8677	3.56897	4.95035e-07	5.20597e-06
SPRING1	1.40084	0	0	80.5396	63.6419	27.1446	79.826	6.31879	5.03103e-07	5.28614e-06
GABPB1	72.8439	84.3317	102.456	17.2585	10.607	3.39307	-7.90474	-2.98272	5.09406e-07	5.34292e-06
WIPF2	11.2068	10.5415	11.7765	77.6632	74.2489	37.3238	5.46239	2.44953	5.09198e-07	5.34292e-06
AMZ2	15.4093	14.0553	14.1319	37.3934	121.98	118.758	6.14427	2.61924	5.12325e-07	5.36881e-06
RPSA	204.523	251.238	241.419	995.24	604.598	2388.72	5.72486	2.51724	5.20382e-07	5.44843e-06
NFATC4	0	1.75691	0	25.8877	53.0349	101.792	82.6943	6.36972	5.2092e-07	5.44928e-06
ACTR10	184.911	165.15	206.09	43.1462	53.0349	54.2892	-3.78948	-1.922	5.21557e-07	5.45114e-06
PTPRS	152.692	94.8731	160.161	28.7642	26.5175	23.7515	-5.14463	-2.36307	5.25266e-07	5.48508e-06
SEL1L3	0	0	0	302.024	344.727	166.261	1077.75	10.0738	5.26901e-07	5.49733e-06
SNRPE	107.865	126.498	105.989	20.1349	31.8209	20.3584	-4.86035	-2.28106	5.2998e-07	5.52461e-06
SF3B1	949.773	1117.39	1132.9	232.99	296.996	108.578	-5.07972	-2.34475	5.32484e-07	5.54585e-06
RNASE1	0	0	0	83.4161	201.533	644.684	1240.78	10.277	5.33937e-07	5.55612e-06
MESD	7.00422	12.2984	14.1319	43.1462	74.2489	78.0407	5.49	2.45681	5.37153e-07	5.58234e-06
NUP93	155.494	175.691	180.181	14.3821	5.30349	67.8615	-5.58146	-2.48064	5.37395e-07	5.58234e-06
NFKB2	93.8566	91.3593	82.4358	20.1349	5.30349	10.1792	-6.59009	-2.7203	5.39126e-07	5.59543e-06
EVA1B	9.80591	3.51382	2.35531	48.8991	5.30349	210.371	16.2819	4.02519	5.42699e-07	5.62761e-06
SMAGP	0	0	1.17765	34.517	53.0349	78.0407	76.7065	6.26128	5.43981e-07	5.63598e-06
EFHD2	15.4093	12.2984	15.3095	83.4161	37.1244	135.723	6.00193	2.58543	5.4481e-07	5.63966e-06
CAMLG	11.2068	7.02764	7.06593	46.0227	47.7314	64.4684	6.12201	2.614	5.46625e-07	5.64862e-06
UBA2	249.35	216.1	221.399	60.4047	58.3384	37.3238	-4.41411	-2.14212	5.46495e-07	5.64862e-06
USB1	5.60338	10.5415	10.5989	54.6519	53.0349	50.8961	5.80851	2.53817	5.49526e-07	5.67367e-06
MLLT3	121.873	59.7349	71.8369	8.62925	10.607	3.39307	-11.324	-3.50131	5.50328e-07	5.67702e-06
IDH3A	142.886	114.199	113.055	25.8877	31.8209	20.3584	-4.84074	-2.27523	5.51213e-07	5.68122e-06
CARNMT1	60.2363	96.6301	96.5677	5.75283	21.214	3.39307	-9.64799	-3.27023	5.56032e-07	5.72593e-06
UBAC2	9.80591	19.326	8.24358	48.8991	68.9454	95.0061	5.8249	2.54223	5.56733e-07	5.72819e-06
GNAQ	261.958	196.774	231.998	48.8991	79.5524	23.7515	-4.87777	-2.28622	5.66091e-07	5.81943e-06
SLFN11	1.40084	3.51382	0	120.809	31.8209	10.1792	31.4545	4.97519	5.70292e-07	5.85756e-06
HELLS	197.519	158.122	133.075	0	0	3.39307	-111.163	-6.79653	5.7706e-07	5.91176e-06
UNC119B	5.60338	3.51382	8.24358	69.034	31.8209	40.7169	7.94779	2.99055	5.76851e-07	5.91176e-06
SNAPC2	5.60338	1.75691	1.17765	40.2698	21.214	44.11	12.2544	3.61522	5.76706e-07	5.91176e-06
NMNAT2	114.869	68.5195	98.923	2.87642	5.30349	0	-35.6512	-5.15588	5.80653e-07	5.94206e-06
N4BP3	89.6541	128.254	73.0146	0	5.30349	3.39307	-35.8846	-5.16529	5.82516e-07	5.94206e-06
PLA2G15	4.20253	15.8122	16.4872	69.034	42.4279	176.44	7.84116	2.97107	5.82511e-07	5.94206e-06
KLF16	7.00422	5.27073	2.35531	46.0227	26.5175	50.8961	8.81729	3.14034	5.8242e-07	5.94206e-06
ISOC2	1.40084	3.51382	3.53296	34.517	15.9105	71.2546	13.7914	3.7857	5.81996e-07	5.94206e-06
WDR6	49.0296	84.3317	65.9487	227.237	243.961	210.371	3.44195	1.78322	5.86809e-07	5.98072e-06
SRSF2	441.266	409.36	441.62	100.675	106.07	132.33	-3.81552	-1.93188	5.89602e-07	6.00405e-06
DIPK2B	16.8101	10.5415	5.88827	63.2811	63.6419	54.2892	5.4742	2.45265	5.90424e-07	6.00728e-06
KAT7	173.705	203.802	186.069	48.8991	68.9454	37.3238	-3.76875	-1.91408	5.93769e-07	6.03614e-06
IDUA	2.80169	5.27073	0	20.1349	47.7314	54.2892	15.0826	3.91481	5.95626e-07	6.04985e-06
HMGB1	381.03	423.415	421.6	103.551	84.8559	122.151	-3.85161	-1.94546	5.99986e-07	6.08894e-06
FCHSD1	11.2068	7.02764	7.06593	51.7755	58.3384	47.503	5.98433	2.58119	6.10466e-07	6.19001e-06
DMXL1	141.485	128.254	166.049	34.517	42.4279	3.39307	-5.75957	-2.52596	6.12243e-07	6.20274e-06
FUCA2	16.8101	15.8122	25.9084	77.6632	106.07	98.3991	4.4975	2.16912	6.31639e-07	6.3938e-06
EPAS1	212.928	117.713	124.831	721.98	811.434	478.423	4.39272	2.13511	6.36217e-07	6.43466e-06
ZNF444	1.40084	5.27073	1.17765	48.8991	10.607	64.4684	16.2685	4.02401	6.3697e-07	6.4368e-06
TWF2	16.8101	8.78455	18.8425	97.7981	31.8209	159.474	6.43797	2.68661	6.40387e-07	6.46036e-06
MRPL49	16.8101	10.5415	9.42124	80.5396	47.7314	57.6823	5.23889	2.38926	6.40239e-07	6.46036e-06
TMED9	112.068	108.928	130.72	457.35	296.996	549.678	3.73925	1.90275	6.51775e-07	6.56967e-06
SLC38A7	19.6118	12.2984	14.1319	71.9104	84.8559	61.0753	4.53297	2.18046	6.6129e-07	6.65994e-06
STIMATE	8.40507	0	1.17765	43.1462	26.5175	47.503	11.6504	3.54231	6.63333e-07	6.67486e-06
KHDRBS1	282.971	346.111	358.007	109.304	68.9454	47.503	-4.23306	-2.0817	6.64855e-07	6.68451e-06
CLIC4	68.6414	54.4642	51.8168	299.147	397.762	128.937	4.6652	2.22194	6.69074e-07	6.72126e-06
SIRT2	26.616	42.1658	45.9285	146.697	106.07	196.798	3.97382	1.99053	6.71424e-07	6.73917e-06
SMYD2	147.089	86.0886	81.2582	11.5057	5.30349	27.1446	-6.66702	-2.73704	6.73577e-07	6.75508e-06
ZNF316	1.40084	1.75691	5.88827	28.7642	26.5175	67.8615	12.0779	3.5943	6.76889e-07	6.78258e-06
ATP5F1E	32.2194	45.6797	56.5274	109.304	143.194	508.961	5.64561	2.49713	6.80259e-07	6.8106e-06
NDUFA1	15.4093	7.02764	9.42124	43.1462	47.7314	142.509	7.18461	2.84491	6.81726e-07	6.81956e-06
SECISBP2	2.80169	1.75691	4.71062	34.517	58.3384	27.1446	10.6404	3.41148	6.8347e-07	6.83126e-06
DYRK3	8.40507	17.5691	5.88827	80.5396	47.7314	44.11	5.7997	2.53598	6.8486e-07	6.8394e-06
EVI5	119.072	124.741	164.872	43.1462	15.9105	3.39307	-6.05752	-2.59873	6.88746e-07	6.86986e-06
GCN1	487.494	495.449	504.036	135.192	159.105	67.8615	-4.23937	-2.08385	6.89065e-07	6.86986e-06
RNF5	2.80169	15.8122	8.24358	40.2698	58.3384	78.0407	6.66235	2.73603	6.92969e-07	6.903e-06
TM6SF1	197.519	115.956	116.588	37.3934	26.5175	10.1792	-5.68032	-2.50597	6.9898e-07	6.95704e-06
SPOCK1	0	0	0	356.676	254.568	145.902	1012.11	9.98314	7.10563e-07	7.06642e-06
TOB1	109.266	84.3317	95.39	23.0113	15.9105	6.78615	-6.118	-2.61306	7.16334e-07	7.11786e-06
MEAK7	1.40084	3.51382	0	54.6519	31.8209	23.7515	22.9013	4.51736	7.18754e-07	7.13594e-06
SFXN5	1.40084	0	3.53296	34.517	42.4279	30.5377	16.5431	4.04816	7.22228e-07	7.16445e-06
PHLDB2	183.511	168.663	164.872	23.0113	79.5524	6.78615	-5.09318	-2.34857	7.24515e-07	7.18115e-06
NUAK1	8.40507	3.51382	8.24358	48.8991	90.1594	30.5377	7.46692	2.90051	7.25716e-07	7.18706e-06
TM4SF1	107.865	77.304	95.39	227.237	429.583	491.996	4.04811	2.01725	7.30593e-07	7.22935e-06
GPC1	0	0	0	181.214	212.14	359.666	1006.31	9.97486	7.33779e-07	7.25483e-06
PRMT3	82.6498	66.7626	80.0805	11.5057	10.607	3.39307	-8.93449	-3.15938	7.3476e-07	7.2585e-06
IRAK4	1.40084	1.75691	3.53296	31.6406	47.7314	30.5377	13.555	3.76075	7.36372e-07	7.26839e-06
GLMP	21.0127	29.8675	36.5073	83.4161	95.4628	223.943	4.58816	2.19792	7.44815e-07	7.34563e-06
TSPO	37.8228	42.1658	63.5934	244.495	84.8559	508.961	5.83037	2.54359	7.49217e-07	7.38292e-06
CASP4	0	0	0	230.113	190.926	308.77	985.51	9.94473	7.53231e-07	7.41633e-06
JAM2	210.127	68.5195	38.8626	0	10.607	3.39307	-25.3678	-4.66493	7.5405e-07	7.41825e-06
gene:ENSG00000283977	91.0549	84.3317	63.5934	5.75283	0	3.39307	-20.4233	-4.35215	7.55586e-07	7.42109e-06
ACAA2	2.80169	7.02764	7.06593	46.0227	21.214	81.4338	8.79018	3.13589	7.55337e-07	7.42109e-06
FCGRT	0	0	0	189.843	143.194	434.313	1027.83	10.0054	7.61773e-07	7.47568e-06
MAK16	74.2448	103.658	80.0805	17.2585	5.30349	6.78615	-7.64274	-2.93409	7.67318e-07	7.52389e-06
TM9SF3	649.992	620.189	585.294	175.461	148.498	37.3238	-5.14154	-2.3622	7.80017e-07	7.64211e-06
TCEAL9	43.4262	47.4366	34.152	166.832	95.4628	183.226	3.76277	1.9118	7.9454e-07	7.77799e-06
RCHY1	84.0507	105.415	97.7453	17.2585	26.5175	6.78615	-6.00157	-2.58534	8.07804e-07	7.90133e-06
SCAF8	138.684	142.31	147.207	43.1462	26.5175	10.1792	-5.12933	-2.35877	8.09143e-07	7.90792e-06
HMGA1	109.266	165.15	217.866	1199.47	429.583	895.772	5.13599	2.36064	8.10776e-07	7.91738e-06
MLLT1	37.8228	36.8951	42.3956	152.45	90.1594	159.474	3.55393	1.82941	8.13543e-07	7.93788e-06
GPR176	0	0	1.17765	63.2811	68.9454	27.1446	73.1901	6.19358	8.16543e-07	7.96063e-06
EED	102.262	100.144	78.9029	20.1349	15.9105	6.78615	-6.30791	-2.65716	8.19039e-07	7.97842e-06
WASHC5	189.114	202.045	229.643	51.7755	79.5524	20.3584	-4.40911	-2.14049	8.23193e-07	8.01232e-06
COPG2	110.667	79.061	82.4358	11.5057	21.214	10.1792	-6.74716	-2.75428	8.26731e-07	8.02705e-06
CBFB	84.0507	107.172	110.7	20.1349	26.5175	10.1792	-5.51767	-2.46406	8.26249e-07	8.02705e-06
PCYT2	14.0084	5.27073	9.42124	60.4047	26.5175	125.544	7.28777	2.86548	8.25728e-07	8.02705e-06
NUDT16	2.80169	0	0	28.7642	42.4279	47.503	32.6409	5.02861	8.30362e-07	8.05136e-06
SLC8B1	9.80591	14.0553	11.7765	48.8991	53.0349	78.0407	5.04654	2.3353	8.30589e-07	8.05136e-06
MAP1S	12.6076	15.8122	8.24358	54.6519	58.3384	64.4684	4.9448	2.30591	8.32577e-07	8.06407e-06
SQSTM1	678.009	586.808	950.367	3655.92	2869.19	3308.25	4.43262	2.14816	8.34335e-07	8.07452e-06
EIF3J	214.329	179.205	153.095	48.8991	63.6419	37.3238	-3.74444	-1.90475	8.37389e-07	8.09749e-06
BIRC6	721.435	628.974	716.014	112.18	169.712	6.78615	-7.21167	-2.85033	8.42525e-07	8.14053e-06
ID3	1.40084	3.51382	4.71062	86.2925	10.607	37.3238	13.3478	3.73853	8.4406e-07	8.14874e-06
AP5B1	0	1.75691	0	92.0453	31.8209	33.9307	74.6308	6.2217	8.46159e-07	8.16238e-06
ZFYVE21	8.40507	1.75691	7.06593	28.7642	42.4279	91.613	8.7893	3.13575	8.47506e-07	8.16875e-06
SLC25A38	7.00422	8.78455	3.53296	60.4047	26.5175	40.7169	7.23874	2.85574	8.57478e-07	8.25817e-06
NCS1	11.2068	12.2984	25.9084	89.1689	79.5524	91.613	5.00767	2.32414	8.58872e-07	8.25822e-06
SC5D	2.80169	5.27073	1.17765	43.1462	42.4279	23.7515	11.8655	3.5687	8.5868e-07	8.25822e-06
PCYOX1	12.6076	14.0553	10.5989	83.4161	95.4628	37.3238	5.65659	2.49993	8.64408e-07	8.30474e-06
LRIG1	121.873	103.658	82.4358	28.7642	0	10.1792	-6.51245	-2.7032	8.74295e-07	8.39295e-06
ATP5F1B	2346.41	2319.12	2294.07	618.429	339.423	566.643	-4.46897	-2.15994	8.75979e-07	8.40233e-06
CHMP2B	117.671	77.304	75.3699	17.2585	5.30349	13.5723	-6.74315	-2.75342	8.76787e-07	8.40331e-06
RPL29	156.895	101.901	150.74	394.069	429.583	1465.81	5.58167	2.4807	8.79332e-07	8.42091e-06
CCDC82	5.60338	3.51382	3.53296	43.1462	106.07	13.5723	11.7875	3.55919	8.85841e-07	8.47643e-06
PTBP3	166.7	186.232	203.734	54.6519	68.9454	16.9654	-4.16504	-2.05833	8.87017e-07	8.48085e-06
RPS28	99.46	108.928	105.989	302.024	254.568	1469.2	6.44055	2.68718	8.90557e-07	8.50786e-06
PDPR	22.4135	3.51382	11.7765	109.304	111.373	40.7169	6.64765	2.73284	8.92527e-07	8.51983e-06
NDUFA13	18.211	15.8122	22.3754	54.6519	63.6419	271.446	6.83708	2.77338	8.94304e-07	8.52996e-06
BMP6	0	0	0	267.507	312.906	142.509	957.819	9.90361	8.96143e-07	8.54064e-06
CDC27	180.709	252.995	244.952	40.2698	90.1594	27.1446	-4.6709	-2.2237	9.08507e-07	8.65155e-06
MT-ATP8	0	0	0	253.125	450.797	74.6476	1034.11	10.0142	9.11533e-07	8.67342e-06
ZNF703	95.2574	98.387	91.8571	14.3821	15.9105	20.3584	-5.55325	-2.47333	9.23206e-07	8.77747e-06
SMIM10L1	1.40084	0	2.35531	31.6406	37.1244	33.9307	20.4961	4.35728	9.24962e-07	8.78714e-06
ADNP	289.975	318.001	275.571	57.5283	121.98	37.3238	-4.475	-2.16189	9.40459e-07	8.92723e-06
PLPPR2	29.4177	17.5691	28.2637	100.675	74.2489	139.116	4.16461	2.05818	9.46939e-07	8.98158e-06
INO80D	107.865	86.0886	90.6794	25.8877	10.607	3.39307	-6.49422	-2.69916	9.49247e-07	8.99629e-06
GSDMD	0	0	3.53296	25.8877	21.214	71.2546	25.0655	4.64763	9.51606e-07	9.00707e-06
EME2	0	1.75691	0	46.0227	42.4279	50.8961	65.6147	6.03595	9.51899e-07	9.00707e-06
CCAR1	305.384	286.376	378.027	74.7868	121.98	40.7169	-4.32065	-2.11125	9.55643e-07	9.03531e-06
OSBPL10	19.6118	12.2984	14.1319	74.7868	111.373	50.8961	4.79781	2.26238	9.57853e-07	9.04183e-06
EIF4G2	4928.17	5295.33	5380.7	1254.12	1325.87	356.273	-5.31966	-2.41133	9.57296e-07	9.04183e-06
DSEL	102.262	100.144	74.1922	17.2585	21.214	0	-7.42548	-2.89249	9.62602e-07	9.07945e-06
LYRM2	1.40084	3.51382	0	43.1462	47.7314	20.3584	21.9405	4.45552	9.77859e-07	9.21605e-06
NUDT14	4.20253	3.51382	7.06593	14.3821	26.5175	183.226	14.3585	3.84384	9.84272e-07	9.26915e-06
PNP	63.038	54.4642	67.1263	218.608	164.408	176.44	3.05757	1.61238	9.94488e-07	9.35794e-06
COMMD3-BMI1	93.8566	75.5471	130.72	8.62925	37.1244	0	-7.78856	-2.96136	9.95456e-07	9.35964e-06
ZNF205	0	1.75691	1.17765	17.2585	47.7314	61.0753	34.7906	5.12062	1.01048e-06	9.49291e-06
ZNF317	4.20253	7.02764	5.88827	34.517	58.3384	40.7169	7.21377	2.85075	1.01123e-06	9.49291e-06
TMEM138	9.80591	3.51382	5.88827	37.3934	58.3384	44.11	6.5747	2.71693	1.01963e-06	9.56429e-06
LIN54	74.2448	86.0886	71.8369	17.2585	0	0	-10.2618	-3.35921	1.02245e-06	9.58316e-06
ZHX1	161.097	131.768	151.917	20.1349	63.6419	3.39307	-6.14856	-2.62025	1.03016e-06	9.64777e-06
PPP4R2	140.084	180.962	183.714	46.0227	68.9454	16.9654	-4.06783	-2.02426	1.03285e-06	9.66541e-06
POLR2B	399.241	404.089	374.494	129.439	106.07	67.8615	-3.81787	-1.93277	1.03614e-06	9.68854e-06
FBN1	0	0	0	307.776	360.637	71.2546	984.124	9.9427	1.04553e-06	9.7687e-06
PRPF8	1225.74	1335.25	1387.28	299.147	355.334	264.66	-4.38357	-2.1321	1.05417e-06	9.84163e-06
MACIR	100.861	80.8179	93.0347	20.1349	15.9105	10.1792	-5.8224	-2.54161	1.06042e-06	9.89224e-06
KMT2E	310.987	333.813	329.743	77.6632	100.766	10.1792	-5.25551	-2.39383	1.06156e-06	9.89513e-06
LDAF1	2.80169	1.75691	2.35531	31.6406	37.1244	30.5377	12.6232	3.658	1.06299e-06	9.90071e-06
TNFRSF10D	0	0	0	299.147	222.747	156.081	908.199	9.82686	1.07849e-06	1.00373e-05
GAB2	21.0127	17.5691	20.0201	120.809	100.766	54.2892	4.64293	2.21504	1.08219e-06	1.00638e-05
PRUNE2	74.2448	79.061	91.8571	14.3821	10.607	10.1792	-6.73035	-2.75068	1.08643e-06	1.00953e-05
POM121	18.211	19.326	14.1319	123.686	68.9454	61.0753	5.071	2.34227	1.08798e-06	1.01018e-05
URM1	12.6076	14.0553	20.0201	51.7755	68.9454	118.758	4.99164	2.31952	1.09238e-06	1.01348e-05
PITRM1	26.616	49.1935	50.6391	230.113	169.712	118.758	4.10965	2.03902	1.1007e-06	1.0204e-05
MRPL32	4.20253	3.51382	5.88827	40.2698	21.214	50.8961	8.08904	3.01597	1.11265e-06	1.02988e-05
PSMF1	42.0253	31.6244	32.9743	112.18	100.766	162.868	3.55964	1.83173	1.11265e-06	1.02988e-05
COPS5	261.958	221.371	270.861	71.9104	53.0349	57.6823	-4.05082	-2.01821	1.11585e-06	1.03178e-05
MSANTD3	7.00422	24.5967	23.5531	89.1689	90.1594	95.0061	4.94733	2.30665	1.11732e-06	1.03178e-05
ATP5PO	18.211	21.0829	15.3095	63.2811	47.7314	261.267	6.82346	2.7705	1.11715e-06	1.03178e-05
C8orf82	5.60338	5.27073	5.88827	46.0227	21.214	54.2892	7.41065	2.8896	1.12159e-06	1.03492e-05
AIFM2	9.80591	12.2984	11.7765	48.8991	42.4279	78.0407	5.04219	2.33405	1.12892e-06	1.04088e-05
AMPD3	100.861	65.0057	83.6135	0	31.8209	3.39307	-9.53005	-3.25248	1.13219e-06	1.04309e-05
RBBP6	187.713	233.669	224.932	60.4047	68.9454	16.9654	-4.55525	-2.18753	1.13553e-06	1.04536e-05
ECI2	8.40507	7.02764	15.3095	69.034	26.5175	111.971	6.62858	2.7287	1.1462e-06	1.05273e-05
CHCHD7	7.00422	5.27073	7.06593	48.8991	31.8209	44.11	6.39237	2.67635	1.14474e-06	1.05273e-05
NOP56	456.675	277.592	289.703	66.1576	53.0349	115.365	-4.2765	-2.09643	1.14556e-06	1.05273e-05
CARS2	5.60338	5.27073	3.53296	34.517	26.5175	61.0753	8.56824	3.099	1.15625e-06	1.06114e-05
B4GALT2	0	0	1.17765	46.0227	26.5175	71.2546	69.8448	6.12608	1.1588e-06	1.06267e-05
SPOCD1	1.40084	0	0	46.0227	21.214	81.4338	71.2116	6.15404	1.16149e-06	1.06365e-05
JAK2	64.4388	82.5748	81.2582	5.75283	21.214	3.39307	-8.77366	-3.13318	1.16166e-06	1.06365e-05
TSPAN14	71.4431	57.978	50.6391	181.214	233.354	166.261	3.14565	1.65336	1.16316e-06	1.0642e-05
ERH	204.523	230.155	202.557	48.8991	53.0349	61.0753	-3.8781	-1.95535	1.1659e-06	1.06589e-05
CLU	0	0	0	106.427	201.533	390.203	931.239	9.86301	1.17299e-06	1.07154e-05
NMI	2.80169	0	1.17765	23.0113	37.1244	47.503	21.2251	4.4077	1.19327e-06	1.08923e-05
CTDSP2	58.8355	59.7349	60.0604	247.372	196.229	132.33	3.23506	1.69379	1.19588e-06	1.09078e-05
ZNF521	15.4093	12.2984	14.1319	94.9217	137.891	30.5377	6.04527	2.59581	1.19988e-06	1.09359e-05
XRN2	287.173	305.702	345.053	97.7981	95.4628	40.7169	-4.06422	-2.02298	1.20145e-06	1.09419e-05
PIGY	4.20253	5.27073	7.06593	31.6406	42.4279	54.2892	7.21242	2.85048	1.2072e-06	1.09858e-05
CDYL2	12.6076	8.78455	11.7765	80.5396	121.98	27.1446	6.5647	2.71473	1.20888e-06	1.09927e-05
TMEM14C	16.8101	14.0553	8.24358	46.0227	63.6419	111.971	5.67684	2.50509	1.21026e-06	1.09968e-05
FAM83G	0	1.75691	0	57.5283	58.3384	30.5377	67.2963	6.07246	1.21421e-06	1.10243e-05
NFATC1	9.80591	10.5415	9.42124	48.8991	53.0349	54.2892	5.15012	2.36461	1.22313e-06	1.10968e-05
CBS	5.60338	0	0	83.4161	15.9105	30.5377	20.8618	4.38279	1.23962e-06	1.12378e-05
RALB	26.616	40.4089	49.4615	175.461	111.373	135.723	3.67481	1.87767	1.25001e-06	1.13148e-05
LMBRD1	105.063	66.7626	89.5018	17.2585	10.607	13.5723	-6.02032	-2.58984	1.24942e-06	1.13148e-05
PRKACB	378.228	263.537	254.373	77.6632	79.5524	10.1792	-5.40309	-2.43379	1.26703e-06	1.14601e-05
SLK	452.473	437.471	455.752	140.944	127.284	40.7169	-4.37565	-2.1295	1.2733e-06	1.15081e-05
BCL10	11.2068	12.2984	12.9542	66.1576	68.9454	44.11	4.76026	2.25104	1.27645e-06	1.15278e-05
C6orf62	330.599	386.52	369.784	120.809	95.4628	44.11	-4.11254	-2.04003	1.29126e-06	1.16527e-05
FBXL17	79.8481	52.7073	88.3241	11.5057	0	3.39307	-12.0156	-3.58683	1.29857e-06	1.17098e-05
SRPX	0	0	0	224.36	169.712	217.157	837.055	9.70918	1.30382e-06	1.17482e-05
IER5L	42.0253	110.685	167.227	11.5057	0	20.3584	-9.09843	-3.18562	1.30812e-06	1.17781e-05
WAPL	190.515	200.288	194.313	69.034	53.0349	23.7515	-3.93109	-1.97493	1.31307e-06	1.18137e-05
CALCOCO1	28.0169	42.1658	23.5531	117.933	185.622	81.4338	4.04948	2.01774	1.3149e-06	1.18212e-05
ZFR	404.844	426.929	451.042	109.304	132.587	20.3584	-4.9546	-2.30877	1.33612e-06	1.20029e-05
ELF2	78.4473	84.3317	85.9688	11.5057	15.9105	13.5723	-6.16695	-2.62456	1.34069e-06	1.20349e-05
POLR2J	8.40507	1.75691	4.71062	40.2698	15.9105	105.185	10.3611	3.3731	1.34483e-06	1.20629e-05
PLTP	0	0	1.17765	34.517	26.5175	91.613	72.9667	6.18917	1.34594e-06	1.20637e-05
F2R	0	0	0	198.473	286.389	156.081	839.95	9.71416	1.35869e-06	1.21689e-05
BID	1.40084	0	0	37.3934	26.5175	84.8268	70.6106	6.14181	1.38406e-06	1.23868e-05
GNPDA1	12.6076	15.8122	21.1978	146.697	47.7314	71.2546	5.41037	2.43573	1.38716e-06	1.24051e-05
SLC16A3	0	0	0	212.855	111.373	312.163	856.759	9.74275	1.39456e-06	1.2462e-05
DNMBP	37.8228	26.3537	28.2637	192.72	116.677	71.2546	4.12847	2.04561	1.40021e-06	1.25031e-05
PRPS1	79.8481	79.061	63.5934	8.62925	15.9105	3.39307	-8.45754	-3.08024	1.41047e-06	1.25852e-05
PEX3	91.0549	63.2488	63.5934	5.75283	10.607	0	-14.3616	-3.84414	1.41928e-06	1.26544e-05
SSR2	54.6329	45.6797	62.4157	279.012	90.1594	407.169	4.78488	2.25848	1.42721e-06	1.27156e-05
WDR75	149.89	137.039	156.628	46.0227	31.8209	20.3584	-4.39727	-2.13661	1.44487e-06	1.28632e-05
MTURN	0	3.51382	1.17765	25.8877	53.0349	30.5377	20.5024	4.35772	1.45243e-06	1.29176e-05
CASP7	16.8101	12.2984	9.42124	48.8991	79.5524	67.8615	4.86906	2.28364	1.45315e-06	1.29176e-05
H3-3A	742.448	713.306	769.008	123.686	127.284	237.515	-4.50702	-2.17217	1.46183e-06	1.29851e-05
ETNK1	121.873	98.387	116.588	34.517	26.5175	10.1792	-4.67275	-2.22427	1.46591e-06	1.30116e-05
CYREN	1.40084	0	1.17765	31.6406	42.4279	30.5377	28.5885	4.83736	1.47387e-06	1.30725e-05
GLS	316.591	326.785	343.875	74.7868	132.587	61.0753	-3.95862	-1.985	1.48012e-06	1.30889e-05
MYD88	4.20253	10.5415	5.88827	74.7868	47.7314	27.1446	7.41224	2.88991	1.47957e-06	1.30889e-05
ZNF207	476.287	562.211	524.056	161.079	143.194	81.4338	-4.03307	-2.01188	1.4796e-06	1.30889e-05
VPS25	148.49	117.713	127.187	28.7642	21.214	37.3238	-4.3505	-2.12118	1.47782e-06	1.30889e-05
COPS7A	224.135	187.989	189.602	57.5283	21.214	64.4684	-3.8679	-1.95155	1.49329e-06	1.31955e-05
HHEX	9.80591	15.8122	23.5531	77.6632	53.0349	105.185	4.77559	2.25568	1.49758e-06	1.32236e-05
SLC41A3	9.80591	1.75691	2.35531	34.517	37.1244	57.6823	8.82391	3.14142	1.50397e-06	1.32702e-05
MYO18A	152.692	154.608	209.623	40.2698	63.6419	44.11	-3.66266	-1.87289	1.51179e-06	1.33293e-05
CD46	0	0	0	184.091	360.637	101.792	855.042	9.73985	1.51716e-06	1.33667e-05
CDC20	36.422	126.498	122.476	2.87642	0	3.39307	-36.2071	-5.1782	1.52164e-06	1.33872e-05
LPCAT3	89.6541	75.5471	98.923	14.3821	15.9105	16.9654	-5.64186	-2.49617	1.52173e-06	1.33872e-05
EMD	7.00422	15.8122	2.35531	69.034	26.5175	74.6476	7.20814	2.84963	1.5315e-06	1.34632e-05
INO80	149.89	115.956	129.542	34.517	21.214	30.5377	-4.38124	-2.13134	1.54661e-06	1.35859e-05
ENO2	1.40084	1.75691	1.17765	40.2698	15.9105	33.9307	19.7534	4.30403	1.56013e-06	1.36946e-05
TNFRSF14	0	0	0	115.057	137.891	390.203	860.094	9.74835	1.56823e-06	1.37444e-05
MAPK9	147.089	152.851	191.958	60.4047	37.1244	27.1446	-3.81126	-1.93027	1.56927e-06	1.37444e-05
CTSH	106.464	68.5195	55.3498	5.75283	0	3.39307	-20.0083	-4.32253	1.56756e-06	1.37444e-05
RUVBL1	88.2532	133.525	120.121	28.7642	21.214	23.7515	-4.45861	-2.15659	1.57832e-06	1.38135e-05
FUCA1	91.0549	68.5195	69.4816	11.5057	0	13.5723	-7.75887	-2.95585	1.59141e-06	1.39178e-05
IGFBP2	0	0	0	152.45	121.98	349.487	836.549	9.70831	1.59662e-06	1.39531e-05
PPIL3	61.6372	63.2488	93.0347	5.75283	10.607	6.78615	-9.84975	-3.30009	1.60009e-06	1.39732e-05
TMCC3	1.40084	3.51382	4.71062	40.2698	53.0349	20.3584	10.2963	3.36405	1.60478e-06	1.40039e-05
ATP7A	152.692	156.365	126.009	31.6406	47.7314	0	-5.90205	-2.56122	1.60915e-06	1.40317e-05
SHE	46.2279	65.0057	58.8827	224.36	249.264	115.365	3.42553	1.77633	1.6171e-06	1.40907e-05
CUL1	263.359	312.73	302.657	89.1689	79.5524	61.0753	-3.78563	-1.92054	1.62031e-06	1.41083e-05
CCT6A	567.342	562.211	580.584	143.821	148.498	152.688	-3.85125	-1.94533	1.62515e-06	1.41401e-05
PGAP6	0	0	0	178.338	164.408	230.729	775.03	9.59811	1.66392e-06	1.44604e-05
APLN	144.287	94.8731	103.634	181.214	625.812	1031.49	5.34639	2.41857	1.66439e-06	1.44604e-05
ZNF672	2.80169	0	1.17765	23.0113	26.5175	54.2892	21.2751	4.4111	1.67614e-06	1.45518e-05
ATRX	360.017	333.813	330.921	66.1576	106.07	3.39307	-5.9218	-2.56604	1.68194e-06	1.45915e-05
NRCAM	0	0	0	365.305	270.478	44.11	907.115	9.82514	1.68595e-06	1.46066e-05
RPA1	226.937	186.232	153.095	54.6519	37.1244	57.6823	-3.64232	-1.86486	1.68613e-06	1.46066e-05
CD2AP	105.063	110.685	94.2124	25.8877	31.8209	6.78615	-4.94938	-2.30725	1.69465e-06	1.46591e-05
TCF12	256.355	277.592	277.926	74.7868	68.9454	6.78615	-5.42418	-2.43941	1.69385e-06	1.46591e-05
MFAP2	0	0	0	146.697	143.194	305.377	798.014	9.64027	1.69623e-06	1.46621e-05
DHX36	140.084	124.741	158.983	34.517	47.7314	16.9654	-4.54869	-2.18545	1.70292e-06	1.47091e-05
NCK1	96.6583	100.144	104.811	28.7642	21.214	6.78615	-5.17926	-2.37275	1.70467e-06	1.47136e-05
MOCS1	72.8439	73.7902	70.6593	0	5.30349	6.78615	-18.7229	-4.22673	1.71964e-06	1.48321e-05
FOXM1	72.8439	94.8731	75.3699	11.5057	10.607	13.5723	-6.51016	-2.70269	1.7282e-06	1.48951e-05
TRIM22	0	0	0	140.944	291.692	166.261	784.907	9.61638	1.73605e-06	1.49519e-05
RRP1B	2.80169	7.02764	9.42124	46.0227	68.9454	33.9307	6.92881	2.79261	1.73772e-06	1.49555e-05
IL1RL1	0	0	0	532.137	84.8559	78.0407	931.13	9.86284	1.74581e-06	1.50033e-05
SMAD3	44.827	40.4089	42.3956	149.574	121.98	125.544	3.14415	1.65267	1.74544e-06	1.50033e-05
KDM2B	79.8481	110.685	88.3241	17.2585	26.5175	6.78615	-5.76923	-2.52838	1.74901e-06	1.502e-05
TRIM21	0	0	4.71062	28.7642	47.7314	30.5377	15.982	3.99837	1.7574e-06	1.50812e-05
TMEM44	12.6076	7.02764	17.6648	43.1462	58.3384	125.544	5.85329	2.54925	1.7605e-06	1.50969e-05
C11orf24	4.20253	10.5415	7.06593	54.6519	21.214	64.4684	6.9675	2.80064	1.77598e-06	1.52187e-05
PPP2R5D	148.49	131.768	133.075	11.5057	63.6419	20.3584	-5.16027	-2.36745	1.79235e-06	1.53479e-05
UBE2D2	294.177	270.564	264.972	74.7868	84.8559	61.0753	-3.81555	-1.93189	1.81859e-06	1.55614e-05
TACSTD2	0	0	0	60.4047	344.727	234.122	847.8	9.72758	1.8206e-06	1.55674e-05
DISP2	130.279	101.901	140.141	0	0	3.39307	-86.2694	-6.43078	1.84277e-06	1.57456e-05
SRSF8	2.80169	1.75691	1.17765	37.3934	42.4279	20.3584	15.4068	3.94549	1.8508e-06	1.58028e-05
FRMD8	12.6076	33.3813	35.3296	92.0453	159.105	115.365	4.37927	2.13069	1.85734e-06	1.58474e-05
RPS26	65.8397	80.8179	63.5934	221.484	153.801	712.546	5.18564	2.37452	1.8624e-06	1.58791e-05
ICAM1	0	0	0	204.226	175.015	173.047	746.207	9.54343	1.87266e-06	1.59552e-05
ZFP36L2	233.941	202.045	233.176	57.5283	74.2489	40.7169	-4.04564	-2.01637	1.87491e-06	1.59629e-05
CLN5	9.80591	8.78455	5.88827	46.0227	84.8559	33.9307	6.25535	2.64509	1.89031e-06	1.60825e-05
MVP	102.262	80.8179	108.344	322.159	228.05	671.829	4.19667	2.06924	1.89833e-06	1.61392e-05
KIF13B	19.6118	14.0553	20.0201	103.551	95.4628	57.6823	4.62385	2.20909	1.92017e-06	1.63132e-05
LRRC8A	68.6414	52.7073	83.6135	258.877	212.14	210.371	3.27825	1.71292	1.92689e-06	1.63586e-05
PLCD3	22.4135	17.5691	11.7765	48.8991	106.07	118.758	5.1846	2.37423	1.93744e-06	1.64364e-05
CD82	1.40084	1.75691	0	31.6406	15.9105	61.0753	31.551	4.97961	1.94462e-06	1.64856e-05
EGR1	1253.76	658.841	971.565	5.75283	212.14	3.39307	-13.1877	-3.72112	1.95938e-06	1.65989e-05
ST6GALNAC4	14.0084	5.27073	8.24358	54.6519	58.3384	44.11	5.40174	2.43342	1.97271e-06	1.67e-05
HSPA12B	263.359	277.592	337.987	28.7642	42.4279	115.365	-4.66322	-2.22133	1.99032e-06	1.6837e-05
SRRD	1.40084	0	2.35531	43.1462	15.9105	30.5377	19.7548	4.30413	1.99744e-06	1.68853e-05
UBE2D3	722.836	811.692	641.822	181.214	201.533	135.723	-4.24206	-2.08477	2.01706e-06	1.7039e-05
NDUFA2	5.60338	0	3.53296	25.8877	10.607	132.33	16.8047	4.0708	2.02182e-06	1.70671e-05
EPB41L5	0	3.51382	1.17765	37.3934	26.5175	27.1446	19.0324	4.25039	2.04315e-06	1.72349e-05
MZF1	1.40084	3.51382	2.35531	28.7642	31.8209	30.5377	11.6941	3.5477	2.05363e-06	1.7311e-05
ANKRD10	12.6076	15.8122	12.9542	46.0227	84.8559	78.0407	4.80118	2.26339	2.06027e-06	1.73547e-05
VPS37C	4.20253	10.5415	4.71062	48.8991	47.7314	30.5377	6.67557	2.73889	2.07323e-06	1.74516e-05
SPNS1	33.6203	35.1382	42.3956	126.562	84.8559	173.047	3.52396	1.8172	2.09411e-06	1.76148e-05
FAM135A	98.0591	89.6024	83.6135	14.3821	31.8209	3.39307	-6.1411	-2.6185	2.09894e-06	1.7643e-05
NOTCH4	421.654	310.973	319.144	66.1576	106.07	111.971	-3.78866	-1.92169	2.1025e-06	1.76604e-05
ATL2	119.072	130.011	121.298	43.1462	21.214	6.78615	-4.82621	-2.27089	2.10565e-06	1.76744e-05
METTL23	2.80169	1.75691	3.53296	20.1349	31.8209	57.6823	12.0201	3.58738	2.11157e-06	1.77116e-05
AEBP2	70.0422	112.442	89.5018	5.75283	37.1244	3.39307	-7.18139	-2.84426	2.12834e-06	1.78271e-05
RAB3D	0	5.27073	4.71062	17.2585	90.1594	33.9307	12.8851	3.68763	2.12702e-06	1.78271e-05
AFF1	40.6245	14.0553	18.8425	149.574	159.105	61.0753	4.9253	2.30021	2.14529e-06	1.79564e-05
C19orf25	1.40084	3.51382	2.35531	40.2698	5.30349	67.8615	15.0661	3.91323	2.14743e-06	1.79617e-05
LSM10	1.40084	0	0	25.8877	31.8209	84.8268	66.8889	6.06369	2.18494e-06	1.82626e-05
CCNG1	392.236	481.393	560.564	80.5396	196.229	50.8961	-4.52256	-2.17714	2.18951e-06	1.82751e-05
PTPN12	449.671	490.178	506.391	115.057	175.015	37.3238	-4.5139	-2.17438	2.18823e-06	1.82751e-05
GIMAP7	1.40084	0	1.17765	25.8877	31.8209	40.7169	27.5718	4.78512	2.20789e-06	1.84108e-05
UBB	3458.69	2450.89	2743.94	627.059	376.548	912.737	-4.48904	-2.16641	2.20886e-06	1.84108e-05
PXDN	109.266	149.337	167.227	546.519	763.703	380.024	3.93103	1.97491	2.22501e-06	1.85194e-05
SPTBN1	2466.89	2531.71	2800.46	762.25	673.543	329.128	-4.42227	-2.14479	2.2236e-06	1.85194e-05
FAM174B	0	0	0	166.832	148.498	210.371	712.684	9.47712	2.24864e-06	1.8703e-05
DTX3L	5.60338	7.02764	1.17765	34.517	63.6419	27.1446	8.7174	3.1239	2.25474e-06	1.87407e-05
TMEM132A	70.0422	42.1658	60.0604	117.933	238.657	437.707	4.57542	2.1939	2.25932e-06	1.87656e-05
HCFC1	303.983	383.006	441.62	103.551	132.587	37.3238	-4.21948	-2.07706	2.27151e-06	1.88537e-05
NUMB	35.0211	50.9504	42.3956	250.248	153.801	105.185	4.01366	2.00492	2.27753e-06	1.88905e-05
RAMP2	81.249	107.172	121.298	5.75283	10.607	37.3238	-5.65183	-2.49872	2.29866e-06	1.90525e-05
APEX1	28.0169	15.8122	25.9084	74.7868	84.8559	135.723	4.12838	2.04557	2.30179e-06	1.90651e-05
RFX5	8.40507	3.51382	8.24358	34.517	58.3384	47.503	6.15256	2.62119	2.32786e-06	1.92676e-05
RUSF1	7.00422	7.02764	8.24358	37.3934	31.8209	78.0407	6.52637	2.70628	2.34304e-06	1.93798e-05
SLC38A1	0	0	0	454.474	228.05	13.5723	929.752	9.8607	2.35032e-06	1.94265e-05
DEF8	16.8101	22.8398	24.7307	71.9104	63.6419	156.081	4.54512	2.18432	2.36159e-06	1.95061e-05
CYB5D2	0	1.75691	0	23.0113	31.8209	88.2199	65.9691	6.04372	2.38496e-06	1.96854e-05
RAD23B	375.426	356.653	363.895	120.809	116.677	61.0753	-3.69912	-1.88718	2.40609e-06	1.98461e-05
NAB1	145.688	91.3593	118.943	31.6406	31.8209	16.9654	-4.47826	-2.16294	2.41389e-06	1.98829e-05
FKBP14	9.80591	5.27073	16.4872	106.427	63.6419	33.9307	6.19636	2.63142	2.41243e-06	1.98829e-05
PLEKHG4	2.80169	0	2.35531	48.8991	21.214	23.7515	15.7775	3.9798	2.4298e-06	2e-05
FBXL7	2.80169	0	0	17.2585	47.7314	47.503	30.6078	4.93583	2.47545e-06	2.03617e-05
COX14	0	0	3.53296	20.1349	31.8209	50.8961	20.9044	4.38573	2.50339e-06	2.05772e-05
CREB1	77.0464	96.6301	91.8571	17.2585	26.5175	6.78615	-5.55859	-2.47472	2.51133e-06	2.06283e-05
GPR162	1.40084	1.75691	1.17765	14.3821	42.4279	50.8961	21.1398	4.40189	2.5143e-06	2.06384e-05
EIF2AK2	2.80169	12.2984	9.42124	60.4047	95.4628	23.7515	7.05427	2.8185	2.52639e-06	2.07234e-05
NDUFS5	0	0	0	120.809	53.0349	430.92	809.769	9.66137	2.55127e-06	2.09131e-05
PER1	107.865	66.7626	84.7911	17.2585	0	20.3584	-5.98467	-2.58127	2.59673e-06	2.1271e-05
SPHK1	0	0	0	230.113	84.8559	206.978	706.378	9.4643	2.62452e-06	2.14839e-05
PPIA	212.928	265.293	222.577	1003.87	535.653	1801.72	4.77813	2.25645	2.62695e-06	2.14889e-05
RFXANK	4.20253	1.75691	0	17.2585	26.5175	71.2546	17.9454	4.16554	2.64359e-06	2.16102e-05
CAPZA2	379.629	346.111	354.474	80.5396	159.105	64.4684	-3.87585	-1.95451	2.68126e-06	2.19031e-05
CPEB4	197.519	152.851	151.917	57.5283	37.1244	0	-5.25388	-2.39338	2.69863e-06	2.20298e-05
NKIRAS2	30.8186	22.8398	34.152	100.675	111.373	105.185	3.47052	1.79515	2.71297e-06	2.21317e-05
STK16	81.249	96.6301	83.6135	8.62925	10.607	27.1446	-5.44383	-2.44462	2.77057e-06	2.25861e-05
UBTF	235.342	245.967	287.348	60.4047	74.2489	74.6476	-3.74881	-1.90643	2.78506e-06	2.26887e-05
COL5A2	78.4473	36.8951	62.4157	235.866	360.637	139.116	4.053	2.01899	2.78986e-06	2.27122e-05
SRSF5	642.988	537.615	573.518	149.574	148.498	169.654	-3.74294	-1.90417	2.81141e-06	2.28721e-05
ATG12	7.00422	1.75691	9.42124	66.1576	58.3384	23.7515	7.40304	2.88812	2.81522e-06	2.28874e-05
ANP32B	323.595	277.592	325.033	77.6632	53.0349	111.971	-3.68974	-1.88352	2.82927e-06	2.29859e-05
SNCA	0	0	0	166.832	185.622	156.081	670.006	9.38803	2.83899e-06	2.30491e-05
PDS5A	442.667	484.907	452.219	129.439	164.408	47.503	-4.13089	-2.04645	2.86424e-06	2.32382e-05
PRPS2	67.2405	86.0886	76.5476	5.75283	0	0	-28.5894	-4.83741	2.8892e-06	2.34248e-05
ARL6IP4	37.8228	22.8398	31.7967	89.1689	74.2489	295.197	4.94305	2.3054	2.91933e-06	2.36529e-05
CAMK2D	135.882	131.768	173.115	43.1462	42.4279	20.3584	-4.2293	-2.08042	2.92499e-06	2.36827e-05
THAP3	2.80169	0	0	23.0113	15.9105	78.0407	33.4637	5.06453	2.92999e-06	2.3707e-05
RPL26	156.895	196.774	204.912	606.924	482.618	1801.72	5.17796	2.37239	2.94894e-06	2.38441e-05
TAF1	287.173	209.072	209.623	63.2811	79.5524	33.9307	-4.12091	-2.04296	2.95882e-06	2.39077e-05
SRP72	336.203	433.957	409.824	123.686	132.587	61.0753	-3.77504	-1.91649	2.98803e-06	2.41274e-05
SMURF1	148.49	163.393	181.359	69.034	26.5175	20.3584	-3.91609	-1.96941	2.99541e-06	2.41706e-05
REPS1	144.287	165.15	169.582	60.4047	26.5175	10.1792	-4.55778	-2.18833	3.03205e-06	2.44496e-05
MAPRE2	47.6287	28.1106	38.8626	152.45	201.533	91.613	3.75087	1.90722	3.04575e-06	2.45435e-05
THAP12	211.528	166.906	134.253	37.3934	79.5524	23.7515	-3.9112	-1.96761	3.09933e-06	2.49583e-05
CDC73	113.468	112.442	114.233	31.6406	37.1244	16.9654	-4.07023	-2.02511	3.10633e-06	2.49808e-05
ARFGAP3	5.60338	7.02764	3.53296	60.4047	37.1244	23.7515	7.6942	2.94377	3.1054e-06	2.49808e-05
SCAMP2	33.6203	22.8398	48.2838	109.304	100.766	179.833	3.65752	1.87086	3.11323e-06	2.50194e-05
GTF3C6	5.60338	8.78455	1.17765	57.5283	26.5175	33.9307	8.36041	3.06357	3.13567e-06	2.51828e-05
MEF2C	71.4431	122.984	127.187	28.7642	15.9105	20.3584	-4.68889	-2.22925	3.16178e-06	2.53383e-05
ATP5MF	5.60338	14.0553	8.24358	48.8991	15.9105	173.047	8.53106	3.09272	3.16148e-06	2.53383e-05
KARS1	494.498	497.206	511.102	123.686	111.373	169.654	-3.65205	-1.8687	3.16356e-06	2.53383e-05
PLD3	56.0338	45.6797	77.7252	146.697	169.712	329.128	3.56932	1.83565	3.16273e-06	2.53383e-05
HPF1	68.6414	63.2488	65.9487	2.87642	5.30349	6.78615	-13.0789	-3.70917	3.17377e-06	2.5403e-05
LEMD2	18.211	15.8122	22.3754	57.5283	106.07	105.185	4.46484	2.15861	3.19352e-06	2.55438e-05
SYT11	8.40507	10.5415	7.06593	63.2811	63.6419	27.1446	5.83661	2.54513	3.29147e-06	2.63096e-05
SNN	8.40507	15.8122	14.1319	43.1462	68.9454	71.2546	4.5893	2.19827	3.29962e-06	2.63571e-05
TMUB1	4.20253	1.75691	1.17765	34.517	5.30349	84.8268	16.3487	4.0311	3.32264e-06	2.65231e-05
PEX10	0	1.75691	1.17765	40.2698	15.9105	33.9307	27.5508	4.78402	3.33429e-06	2.65983e-05
ANKFY1	152.692	175.691	175.471	48.8991	68.9454	37.3238	-3.38808	-1.76047	3.37339e-06	2.68922e-05
ADA	4.20253	3.51382	7.06593	28.7642	53.0349	40.7169	7.17295	2.84257	3.3808e-06	2.69213e-05
SLC19A1	4.20253	3.51382	0	28.7642	31.8209	30.5377	11.6926	3.54752	3.38157e-06	2.69213e-05
RAPGEF6	57.4346	79.061	69.4816	2.87642	15.9105	0	-13.4509	-3.74963	3.42728e-06	2.72669e-05
SIL1	8.40507	14.0553	11.7765	48.8991	31.8209	125.544	6.07605	2.60313	3.46504e-06	2.75489e-05
GSPT1	472.085	525.316	542.899	166.832	153.801	71.2546	-3.94906	-1.98151	3.48123e-06	2.76592e-05
CCT4	689.216	718.576	738.389	178.338	143.194	200.191	-4.01955	-2.00704	3.4911e-06	2.7719e-05
ANGPTL4	0	0	0	120.809	148.498	213.764	644.434	9.33189	3.50823e-06	2.78365e-05
MRPL53	2.80169	0	1.17765	20.1349	10.607	88.2199	24.8129	4.63302	3.55893e-06	2.822e-05
SEC23B	135.882	163.393	187.247	63.2811	21.214	33.9307	-3.78002	-1.91839	3.56276e-06	2.82315e-05
PPID	103.662	144.067	142.496	37.3934	26.5175	27.1446	-4.1329	-2.04716	3.56891e-06	2.82614e-05
SLX1A	1.40084	0	0	28.7642	15.9105	98.3991	67.5237	6.07732	3.59504e-06	2.84465e-05
NCOA6	235.342	231.912	217.866	63.2811	79.5524	16.9654	-4.4828	-2.1644	3.59707e-06	2.84465e-05
SGCE	103.662	94.8731	116.588	11.5057	5.30349	44.11	-4.86396	-2.28213	3.60118e-06	2.84601e-05
PPP1R18	63.038	73.7902	85.9688	250.248	217.443	298.591	3.45547	1.78888	3.60703e-06	2.84874e-05
RGS2	159.696	65.0057	68.304	11.5057	26.5175	6.78615	-6.99964	-2.80728	3.64303e-06	2.87526e-05
R3HDM4	9.80591	15.8122	12.9542	48.8991	47.7314	78.0407	4.58612	2.19727	3.65491e-06	2.88273e-05
RNF145	144.287	158.122	177.826	31.6406	68.9454	47.503	-3.50715	-1.8103	3.65865e-06	2.88376e-05
TELO2	2.80169	5.27073	5.88827	31.6406	21.214	61.0753	8.03602	3.00648	3.66583e-06	2.88751e-05
KCNJ2	2.80169	5.27073	3.53296	34.517	58.3384	20.3584	8.80383	3.13813	3.71221e-06	2.9221e-05
IRF1	11.2068	1.75691	7.06593	34.517	47.7314	54.2892	6.15103	2.62083	3.76526e-06	2.96177e-05
ARL10	7.00422	3.51382	5.88827	31.6406	74.2489	30.5377	7.19564	2.84712	3.76786e-06	2.96177e-05
RALGAPA1	119.072	149.337	136.608	25.8877	58.3384	3.39307	-5.26121	-2.39539	3.77007e-06	2.96177e-05
SIPA1L3	176.506	154.608	180.181	48.8991	79.5524	13.5723	-3.94796	-1.98111	3.7742e-06	2.96306e-05
AKR1B1	107.865	63.2488	94.2124	232.99	254.568	532.713	3.83296	1.93846	3.80832e-06	2.9859e-05
TMEM50B	9.80591	7.02764	7.06593	43.1462	53.0349	40.7169	5.44787	2.44569	3.80642e-06	2.9859e-05
PSMC6	166.7	170.42	190.78	60.4047	53.0349	47.503	-3.26014	-1.70493	3.81152e-06	2.98645e-05
CHKA	19.6118	15.8122	20.0201	63.2811	79.5524	78.0407	3.81418	1.93137	3.81797e-06	2.98953e-05
ANKRD13A	222.734	163.393	155.45	69.034	37.1244	40.7169	-3.51361	-1.81295	3.836e-06	3.00167e-05
GADD45B	0	1.75691	1.17765	23.0113	47.7314	30.5377	26.5689	4.73166	3.93471e-06	3.07688e-05
SPATA6	49.0296	82.5748	74.1922	2.87642	0	6.78615	-17.7201	-4.14732	3.94475e-06	3.08271e-05
BTD	4.20253	5.27073	4.71062	31.6406	37.1244	33.9307	6.87452	2.78126	3.95248e-06	3.08672e-05
MGP	0	0	0	57.5283	169.712	278.232	673.255	9.39501	3.99008e-06	3.11404e-05
OSGIN2	25.2152	12.2984	8.24358	112.18	95.4628	44.11	5.45076	2.44646	3.99273e-06	3.11407e-05
PPP2R5C	152.692	207.315	226.11	40.2698	84.8559	44.11	-3.69792	-1.88671	4.00511e-06	3.12168e-05
ERAP2	0	0	0	126.562	175.015	169.654	612.642	9.2589	4.04057e-06	3.14726e-05
CPSF6	240.945	288.133	268.505	66.1576	74.2489	78.0407	-3.65514	-1.86993	4.04363e-06	3.14758e-05
ARPC2	1095.46	1085.77	1309.55	256.001	228.05	356.273	-4.10453	-2.03722	4.06535e-06	3.16241e-05
UBAP2	134.481	151.094	181.359	48.8991	47.7314	30.5377	-3.70352	-1.8889	4.10503e-06	3.19119e-05
CENPX	0	0	1.17765	31.6406	21.214	67.8615	58.1308	5.86123	4.14133e-06	3.21731e-05
CCNA2	64.4388	151.094	129.542	2.87642	0	0	-79.0944	-6.3055	4.16443e-06	3.23314e-05
CYB5A	117.671	73.7902	101.278	20.1349	5.30349	27.1446	-5.08869	-2.34729	4.17947e-06	3.2427e-05
LPXN	0	1.75691	0	83.4161	37.1244	13.5723	61.9282	5.95252	4.1838e-06	3.24395e-05
SPR	5.60338	5.27073	4.71062	34.517	21.214	61.0753	7.57465	2.92118	4.22963e-06	3.27734e-05
BCAT2	7.00422	5.27073	4.71062	37.3934	15.9105	74.6476	7.57045	2.92038	4.24864e-06	3.28993e-05
DEK	162.498	166.906	133.075	40.2698	63.6419	20.3584	-3.93221	-1.97534	4.28397e-06	3.31347e-05
KDELR3	1.40084	1.75691	0	46.0227	31.8209	16.9654	27.2089	4.76601	4.28461e-06	3.31347e-05
CIAPIN1	11.2068	5.27073	15.3095	71.9104	42.4279	47.503	4.93742	2.30376	4.2901e-06	3.31556e-05
GOLGB1	50.4304	66.7626	65.9487	307.776	222.747	115.365	3.53003	1.81968	4.33198e-06	3.34575e-05
VBP1	72.8439	72.0333	82.4358	20.1349	10.607	3.39307	-6.23634	-2.6407	4.34419e-06	3.353e-05
NUP160	114.869	100.144	95.39	25.8877	42.4279	6.78615	-4.47179	-2.16085	4.37191e-06	3.37221e-05
SCAND1	9.80591	8.78455	7.06593	51.7755	15.9105	95.0061	6.4491	2.6891	4.39123e-06	3.38492e-05
ARHGEF5	82.6498	57.978	61.238	8.62925	0	0	-17.523	-4.13117	4.41173e-06	3.39852e-05
TNRC6B	152.692	156.365	158.983	48.8991	58.3384	16.9654	-3.91167	-1.96778	4.41687e-06	3.40027e-05
ATXN2	161.097	163.393	170.76	60.4047	63.6419	20.3584	-3.51167	-1.81216	4.44114e-06	3.41674e-05
PIP4K2C	72.8439	82.5748	97.7453	14.3821	15.9105	20.3584	-4.99985	-2.32189	4.45644e-06	3.4263e-05
KAT6A	201.722	245.967	286.17	83.4161	63.6419	27.1446	-4.17156	-2.06059	4.46295e-06	3.42909e-05
MAOA	75.6456	57.978	57.7051	2.87642	10.607	3.39307	-12.6177	-3.65737	4.48134e-06	3.441e-05
CDK5RAP3	14.0084	21.0829	20.0201	37.3934	79.5524	196.798	5.64685	2.49745	4.51052e-06	3.46117e-05
TRNP1	0	0	0	186.967	68.9454	200.191	617.509	9.27032	4.51627e-06	3.46198e-05
TRIM44	0	0	0	161.079	164.408	118.758	587.998	9.19967	4.51739e-06	3.46198e-05
SAMD5	63.038	63.2488	90.6794	0	5.30349	3.39307	-27.5399	-4.78345	4.57905e-06	3.50697e-05
USP11	4.20253	0	0	28.7642	31.8209	27.1446	17.5874	4.13647	4.5847e-06	3.50903e-05
PALMD	0	0	0	83.4161	212.14	166.261	607.132	9.24587	4.60507e-06	3.52236e-05
LYRM4	2.80169	3.51382	3.53296	25.8877	21.214	50.8961	9.60226	3.26337	4.63576e-06	3.54355e-05
DIPK2A	1.40084	0	3.53296	37.3934	47.7314	13.5723	15.2211	3.928	4.65556e-06	3.5564e-05
KCNK6	0	0	1.17765	37.3934	15.9105	64.4684	57.3773	5.84241	4.67369e-06	3.56796e-05
LTN1	105.063	108.928	96.5677	23.0113	47.7314	3.39307	-4.69618	-2.23149	4.70837e-06	3.59214e-05
RNF181	18.211	19.326	10.5989	63.2811	42.4279	139.116	5.19902	2.37824	4.7144e-06	3.59443e-05
TSC22D3	184.911	133.525	126.009	17.2585	37.1244	50.8961	-4.32916	-2.11409	4.72686e-06	3.60162e-05
GADD45A	40.6245	26.3537	16.4872	77.6632	132.587	135.723	4.09432	2.03362	4.73621e-06	3.60589e-05
DYRK1A	126.076	152.851	164.872	37.3934	58.3384	16.9654	-4.21652	-2.07605	4.73853e-06	3.60589e-05
YWHAH	1060.44	997.925	1009.25	201.349	238.657	322.342	-4.04228	-2.01517	4.74926e-06	3.61175e-05
TNIP1	47.6287	59.7349	43.5732	192.72	74.2489	332.521	4.0177	2.00637	4.78575e-06	3.63717e-05
FBXW8	58.8355	59.7349	67.1263	11.5057	0	3.39307	-9.97493	-3.31831	4.82997e-06	3.66844e-05
SBF2	170.903	154.608	184.892	51.7755	79.5524	20.3584	-3.6454	-1.86608	4.84997e-06	3.68127e-05
HMGB2	127.477	221.371	179.004	66.1576	26.5175	40.7169	-3.71875	-1.89482	4.85954e-06	3.68618e-05
ATF2	148.49	193.26	173.115	51.7755	74.2489	13.5723	-3.90749	-1.96624	4.89341e-06	3.70951e-05
CPPED1	8.40507	7.02764	8.24358	46.0227	42.4279	37.3238	5.15383	2.36564	4.911e-06	3.72048e-05
PANX1	19.6118	5.27073	8.24358	100.675	42.4279	47.503	5.72763	2.51794	4.91579e-06	3.72173e-05
PLXNB1	5.60338	3.51382	12.9542	46.0227	31.8209	67.8615	6.18831	2.62954	4.93282e-06	3.73225e-05
CCL2	11.2068	0	4.71062	14.3821	116.677	54.2892	10.7209	3.42236	4.9522e-06	3.74453e-05
PLPP3	145.688	107.172	128.364	43.1462	21.214	23.7515	-4.0797	-2.02846	4.98248e-06	3.76503e-05
DGLUCY	15.4093	22.8398	16.4872	54.6519	74.2489	91.613	4.01062	2.00382	4.99262e-06	3.7703e-05
C11orf96	0	1.75691	1.17765	34.517	10.607	44.11	27.515	4.78214	5.06461e-06	3.82224e-05
FAM32A	18.211	12.2984	34.152	83.4161	74.2489	125.544	4.23581	2.08264	5.08943e-06	3.83853e-05
MRPL30	2.80169	1.75691	5.88827	37.3934	15.9105	44.11	8.78274	3.13467	5.09366e-06	3.83929e-05
RAB1A	683.612	730.875	655.954	195.596	196.229	135.723	-3.93089	-1.97486	5.10084e-06	3.84227e-05
SHB	18.211	10.5415	17.6648	57.5283	68.9454	81.4338	4.25383	2.08876	5.10904e-06	3.84357e-05
RNF213	57.4346	119.47	76.5476	422.833	456.1	162.868	4.10665	2.03796	5.10889e-06	3.84357e-05
DPP9	30.8186	42.1658	42.3956	163.956	74.2489	139.116	3.4071	1.76855	5.11763e-06	3.84761e-05
PLCG2	140.084	80.8179	80.0805	20.1349	21.214	20.3584	-4.85495	-2.27946	5.25819e-06	3.95079e-05
SEC61A1	152.692	200.288	213.155	995.24	578.081	654.863	3.95756	1.98461	5.26188e-06	3.95106e-05
LRRFIP1	61.6372	33.3813	62.4157	221.484	159.105	152.688	3.35367	1.74574	5.30235e-06	3.97894e-05
PCF11	201.722	224.884	190.78	77.6632	53.0349	20.3584	-3.92573	-1.97296	5.32405e-06	3.99028e-05
SLIRP	1.40084	0	0	28.7642	15.9105	78.0407	58.3358	5.86631	5.32417e-06	3.99028e-05
C1QTNF5	0	0	0	54.6519	100.766	325.735	643.289	9.32932	5.34181e-06	4.00098e-05
COX7B	12.6076	28.1106	20.0201	66.1576	53.0349	193.405	5.19382	2.37679	5.35377e-06	4.00741e-05
SOCS5	117.671	77.304	90.6794	17.2585	37.1244	6.78615	-5.20535	-2.38	5.38006e-06	4.02456e-05
PIAS4	8.40507	15.8122	14.1319	43.1462	58.3384	67.8615	4.3085	2.10719	5.40901e-06	4.04367e-05
PIR	0	0	0	66.1576	143.194	240.908	599.905	9.22859	5.41477e-06	4.04543e-05
ABI1	245.148	305.702	287.348	97.7981	79.5524	33.9307	-3.92844	-1.97396	5.45373e-06	4.07198e-05
BABAM2	120.473	96.6301	96.5677	20.1349	5.30349	40.7169	-4.311	-2.10802	5.50603e-06	4.10845e-05
CCDC117	0	1.75691	2.35531	40.2698	37.1244	13.5723	18.3294	4.19609	5.57507e-06	4.15736e-05
CCDC71L	8.40507	7.02764	3.53296	23.0113	42.4279	67.8615	6.90142	2.78689	5.59297e-06	4.16809e-05
TIMM10B	1.40084	0	0	37.3934	53.0349	27.1446	52.2573	5.70756	5.60466e-06	4.17419e-05
ASH2L	117.671	128.254	134.253	31.6406	31.8209	37.3238	-3.74908	-1.90654	5.60923e-06	4.17498e-05
TBC1D19	84.0507	103.658	100.101	28.7642	21.214	6.78615	-4.91638	-2.2976	5.62416e-06	4.18348e-05
ADCY3	1.40084	0	0	34.517	47.7314	30.5377	50.5801	5.6605	5.63974e-06	4.19244e-05
ODF2	106.464	115.956	115.41	20.1349	26.5175	40.7169	-3.87022	-1.95242	5.66635e-06	4.20959e-05
ARL16	4.20253	3.51382	3.53296	20.1349	21.214	84.8268	10.725	3.42291	5.68628e-06	4.22176e-05
RNF19A	161.097	117.713	122.476	20.1349	63.6419	16.9654	-4.53364	-2.18067	5.69986e-06	4.2292e-05
MBD5	70.0422	59.7349	89.5018	14.3821	21.214	0	-6.71311	-2.74698	5.70945e-06	4.23368e-05
QKI	361.418	337.327	368.606	100.675	148.498	74.6476	-3.48396	-1.80073	5.74669e-06	4.25864e-05
ACTR1B	194.717	119.47	124.831	17.2585	31.8209	50.8961	-4.43612	-2.1493	5.75473e-06	4.26194e-05
MBD2	168.101	175.691	203.734	54.6519	63.6419	57.6823	-3.17621	-1.66731	5.76269e-06	4.26518e-05
SELENOO	5.60338	1.75691	7.06593	28.7642	21.214	78.0407	8.29521	3.05228	5.78352e-06	4.27794e-05
FAM107A	11.2068	3.51382	4.71062	37.3934	42.4279	44.11	6.04209	2.59505	5.80844e-06	4.2937e-05
SMNDC1	74.2448	73.7902	69.4816	11.5057	21.214	6.78615	-5.89441	-2.55935	5.81594e-06	4.29657e-05
TLK2	266.16	230.155	222.577	80.5396	63.6419	47.503	-3.67267	-1.87683	5.85316e-06	4.32138e-05
MAN1A1	74.2448	124.741	140.141	28.7642	21.214	27.1446	-4.26703	-2.09323	5.86284e-06	4.32585e-05
AFDN	375.426	349.625	372.139	97.7981	148.498	33.9307	-4.03522	-2.01265	5.86678e-06	4.32607e-05
MRPL9	8.40507	3.51382	11.7765	34.517	31.8209	95.0061	6.48815	2.69781	5.91728e-06	4.34983e-05
SNX4	93.8566	70.2764	81.2582	17.2585	21.214	10.1792	-5.20278	-2.37928	5.91571e-06	4.34983e-05
LCORL	71.4431	79.061	69.4816	14.3821	15.9105	6.78615	-5.93489	-2.56922	5.91011e-06	4.34983e-05
ARHGAP24	0	0	0	224.36	121.98	78.0407	570.626	9.1564	5.91084e-06	4.34983e-05
TMEM192	1.40084	8.78455	1.17765	28.7642	74.2489	20.3584	10.6934	3.41865	5.9028e-06	4.34983e-05
WBP11	109.266	112.442	93.0347	34.517	26.5175	13.5723	-4.0733	-2.0262	5.95462e-06	4.37457e-05
PWWP2B	1.40084	0	1.17765	11.5057	31.8209	61.0753	29.6228	4.88863	6.00742e-06	4.41063e-05
PSIP1	88.2532	128.254	94.2124	31.6406	21.214	16.9654	-4.21727	-2.07631	6.03852e-06	4.43073e-05
LXN	166.7	94.8731	68.304	5.75283	21.214	33.9307	-5.49525	-2.45818	6.10084e-06	4.4737e-05
CORO7	1.40084	1.75691	9.42124	25.8877	26.5175	81.4338	9.64524	3.26982	6.14438e-06	4.50285e-05
CDC25B	4.20253	33.3813	48.2838	60.4047	238.657	305.377	6.95665	2.79839	6.17632e-06	4.52347e-05
SLC9A5	71.4431	54.4642	60.0604	0	5.30349	13.5723	-9.97276	-3.31799	6.26277e-06	4.58396e-05
SUCLG2	99.46	98.387	110.7	37.3934	21.214	13.5723	-4.06842	-2.02447	6.35567e-06	4.64338e-05
STK3	85.4515	65.0057	73.0146	14.3821	15.9105	10.1792	-5.57583	-2.47919	6.35173e-06	4.64338e-05
MAPK6	240.945	282.863	293.236	97.7981	63.6419	16.9654	-4.52561	-2.17811	6.35465e-06	4.64338e-05
SCAF4	130.279	105.415	97.7453	37.3934	21.214	20.3584	-3.98077	-1.99305	6.37315e-06	4.6533e-05
TPGS2	36.422	21.0829	30.619	161.079	58.3384	125.544	3.98368	1.9941	6.38317e-06	4.65776e-05
UQCR11	0	0	0	77.6632	68.9454	298.591	596.751	9.22099	6.40604e-06	4.67158e-05
ZBED5	0	1.75691	0	34.517	53.0349	27.1446	50.5831	5.66058	6.45037e-06	4.70102e-05
LOX	0	0	0	371.058	79.5524	30.5377	645.147	9.33348	6.47506e-06	4.71613e-05
SHARPIN	2.80169	0	3.53296	25.8877	5.30349	98.3991	17.8001	4.15382	6.54055e-06	4.76091e-05
NCK2	7.00422	0	9.42124	31.6406	58.3384	44.11	6.68418	2.74075	6.56649e-06	4.77687e-05
SMARCA4	371.224	440.984	494.615	152.45	127.284	105.185	-3.36507	-1.75064	6.58932e-06	4.79055e-05
TREX1	0	1.75691	1.17765	23.0113	15.9105	54.2892	27.0876	4.75956	6.66574e-06	4.84315e-05
ANAPC2	110.667	107.172	107.167	23.0113	31.8209	33.9307	-3.72529	-1.89735	6.71373e-06	4.87503e-05
NIPAL3	0	0	1.17765	37.3934	15.9105	50.8961	52.2025	5.70605	6.7294e-06	4.88343e-05
MGST3	22.4135	26.3537	47.1062	135.192	53.0349	237.515	4.43605	2.14927	6.73368e-06	4.88356e-05
RIC8B	109.266	84.3317	94.2124	28.7642	5.30349	20.3584	-4.67602	-2.22528	6.77217e-06	4.90848e-05
CTSC	0	0	0	109.304	127.284	159.474	526.026	9.03899	6.83228e-06	4.94903e-05
KCTD7	0	3.51382	2.35531	48.8991	42.4279	10.1792	15.8486	3.98628	6.89369e-06	4.98442e-05
RRM2B	23.8144	29.8675	22.3754	140.944	196.229	37.3238	4.84725	2.27717	6.88929e-06	4.98442e-05
RPL3	368.422	398.819	409.824	1297.26	922.807	3338.78	4.72464	2.24021	6.89371e-06	4.98442e-05
CRTAP	64.4388	38.652	41.2179	126.562	175.015	210.371	3.49446	1.80507	6.92947e-06	5.00723e-05
SH3GL1	50.4304	47.4366	68.304	166.832	127.284	251.087	3.28876	1.71754	6.95277e-06	5.02103e-05
CASP3	12.6076	26.3537	28.2637	66.1576	95.4628	115.365	4.02856	2.01027	6.99123e-06	5.04573e-05
GABBR1	85.4515	110.685	95.39	20.1349	31.8209	16.9654	-4.39827	-2.13694	7.01222e-06	5.05781e-05
PTBP2	53.2321	50.9504	71.8369	0	10.607	3.39307	-15.5114	-3.95526	7.04932e-06	5.08149e-05
COX8A	37.8228	36.8951	41.2179	100.675	95.4628	254.481	3.89509	1.96166	7.06332e-06	5.0885e-05
ANKRD9	2.80169	0	2.35531	20.1349	15.9105	57.6823	15.3548	3.94061	7.08066e-06	5.0979e-05
RTN4	2515.92	1858.81	1728.8	598.294	578.081	325.735	-4.07125	-2.02547	7.12721e-06	5.12831e-05
UBR1	151.291	107.172	181.359	28.7642	63.6419	13.5723	-4.51941	-2.17614	7.1964e-06	5.17497e-05
ITFG1	182.11	163.393	171.938	37.3934	95.4628	30.5377	-3.57495	-1.83792	7.22766e-06	5.1943e-05
PIP4P2	64.4388	77.304	71.8369	14.3821	0	13.5723	-6.41072	-2.68049	7.33274e-06	5.26346e-05
PIEZO2	0	0	1.17765	48.8991	58.3384	13.5723	55.733	5.80046	7.33211e-06	5.26346e-05
CYP27A1	0	0	1.17765	20.1349	42.4279	50.8961	51.59	5.68902	7.40283e-06	5.31057e-05
STC2	0	0	0	348.046	63.6419	44.11	611.98	9.25734	7.41409e-06	5.31544e-05
RBM48	1.40084	3.51382	3.53296	23.0113	21.214	44.11	9.90347	3.30793	7.46385e-06	5.34789e-05
PRPF39	114.869	149.337	108.344	23.0113	58.3384	3.39307	-4.9253	-2.30021	7.48383e-06	5.35898e-05
NPIPB5	0	0	0	115.057	169.712	115.365	511.606	8.99889	7.48986e-06	5.36007e-05
LHX6	54.6329	65.0057	64.771	5.75283	5.30349	10.1792	-8.24542	-3.04359	7.66576e-06	5.48265e-05
CYCS	1.40084	1.75691	4.71062	60.4047	5.30349	37.3238	12.1125	3.59842	7.69084e-06	5.49729e-05
TLR4	5.60338	14.0553	20.0201	100.675	116.677	23.7515	5.88228	2.55637	7.69776e-06	5.49893e-05
SNX5	155.494	179.205	138.963	48.8991	63.6419	30.5377	-3.3854	-1.75933	7.74047e-06	5.52612e-05
SYF2	11.2068	3.51382	14.1319	57.5283	42.4279	50.8961	4.92193	2.29922	7.7466e-06	5.52718e-05
DOCK8	93.8566	56.2211	56.5274	0	5.30349	3.39307	-25.8237	-4.69062	7.80644e-06	5.56653e-05
RXYLT1	72.8439	57.978	57.7051	5.75283	5.30349	10.1792	-8.43448	-3.0763	7.81938e-06	5.57112e-05
NR1D1	119.072	79.061	76.5476	5.75283	15.9105	30.5377	-5.33288	-2.41491	7.82224e-06	5.57112e-05
TP53INP1	33.6203	21.0829	20.0201	80.5396	143.194	78.0407	3.8286	1.93682	7.91009e-06	5.62695e-05
ULK2	109.266	86.0886	73.0146	20.1349	10.607	20.3584	-4.88861	-2.28943	7.90836e-06	5.62695e-05
NAGK	22.4135	22.8398	28.2637	86.2925	53.0349	159.474	4.10196	2.03632	7.94687e-06	5.64973e-05
ECHS1	22.4135	31.6244	43.5732	97.7981	68.9454	268.053	4.44952	2.15365	7.96389e-06	5.65845e-05
KPNA4	388.034	483.15	413.357	129.439	169.712	71.2546	-3.57848	-1.83935	8.00328e-06	5.67966e-05
TSKU	4.20253	3.51382	2.35531	40.2698	15.9105	30.5377	8.92431	3.15774	7.99874e-06	5.67966e-05
HIGD1A	1.40084	0	2.35531	25.8877	42.4279	20.3584	16.8687	4.07628	8.02098e-06	5.68882e-05
ENGASE	7.00422	1.75691	0	28.7642	31.8209	33.9307	10.2962	3.36405	8.07381e-06	5.72288e-05
COPS6	375.426	372.465	392.159	74.7868	90.1594	159.474	-3.51066	-1.81174	8.13316e-06	5.76152e-05
METTL17	1.40084	3.51382	2.35531	28.7642	15.9105	33.9307	10.7625	3.42794	8.20598e-06	5.80964e-05
THSD7A	42.0253	65.0057	81.2582	0	15.9105	0	-15.996	-3.99964	8.22967e-06	5.82294e-05
PGM2	112.068	80.8179	98.923	23.0113	31.8209	16.9654	-4.26581	-2.09282	8.25011e-06	5.83329e-05
CNOT1	780.27	831.018	814.937	241.619	217.443	54.2892	-4.73611	-2.2437	8.2541e-06	5.83329e-05
PDLIM2	1.40084	0	0	25.8877	26.5175	50.8961	48.8784	5.61113	8.27775e-06	5.84653e-05
MEX3C	124.675	200.288	162.516	60.4047	42.4279	6.78615	-4.39634	-2.1363	8.30478e-06	5.86214e-05
ATP13A1	232.54	224.884	197.846	46.0227	31.8209	88.2199	-3.74403	-1.90459	8.33937e-06	5.88306e-05
MALL	0	0	0	132.315	79.5524	152.688	502.948	8.97426	8.41799e-06	5.93501e-05
ESM1	0	0	0	161.079	143.194	74.6476	504.929	8.97994	8.4383e-06	5.9458e-05
MAPRE1	281.57	316.244	319.144	106.427	95.4628	78.0407	-3.25121	-1.70098	8.46768e-06	5.96297e-05
PSMD12	273.165	270.564	301.48	103.551	79.5524	47.503	-3.6159	-1.85436	8.47309e-06	5.96325e-05
PLA2G6	49.0296	66.7626	58.8827	5.75283	5.30349	6.78615	-9.2313	-3.20653	8.47899e-06	5.96387e-05
STEAP3	0	0	1.17765	109.304	5.30349	23.7515	67.8251	6.08375	8.49306e-06	5.97024e-05
POGLUT1	107.865	66.7626	74.1922	11.5057	31.8209	6.78615	-5.60709	-2.48725	8.50556e-06	5.97549e-05
CDC42EP5	5.60338	5.27073	2.35531	25.8877	10.607	101.792	10.3104	3.36603	8.53696e-06	5.99402e-05
ABI3BP	0	0	0	184.091	201.533	30.5377	553.776	9.11316	8.55879e-06	6.0058e-05
TMEM126B	2.80169	0	0	25.8877	31.8209	27.1446	23.5184	4.55572	8.60362e-06	6.03257e-05
KMT2B	155.494	179.205	141.319	60.4047	37.1244	37.3238	-3.32125	-1.73172	8.60708e-06	6.03257e-05
TOR3A	0	5.27073	0	17.2585	21.214	61.0753	19.2979	4.27037	8.66443e-06	6.06918e-05
LMNB2	16.8101	21.0829	10.5989	57.5283	68.9454	74.6476	4.22432	2.07872	8.70113e-06	6.0913e-05
CSTF2	68.6414	93.1162	88.3241	11.5057	15.9105	23.7515	-4.86663	-2.28292	8.75035e-06	6.12215e-05
PRRC2A	892.338	1041.85	1136.44	371.058	196.229	162.868	-4.14957	-2.05296	8.81077e-06	6.15523e-05
STRIP2	2.80169	3.51382	0	54.6519	26.5175	13.5723	14.9815	3.90511	8.81314e-06	6.15523e-05
ZFTA	4.20253	19.326	10.5989	60.4047	42.4279	54.2892	4.92659	2.30059	8.80827e-06	6.15523e-05
BAZ1B	392.236	347.868	367.428	135.192	121.98	71.2546	-3.37626	-1.75543	8.84079e-06	6.17091e-05
USP21	70.0422	68.5195	76.5476	5.75283	0	23.7515	-6.53282	-2.70771	8.9284e-06	6.22841e-05
GTF3C3	89.6541	86.0886	100.101	20.1349	37.1244	6.78615	-4.76618	-2.25283	8.95049e-06	6.24016e-05
RC3H1	96.6583	133.525	130.72	37.3934	42.4279	6.78615	-4.29919	-2.10407	8.97469e-06	6.25337e-05
USP5	334.802	284.619	369.784	94.9217	106.07	105.185	-3.27953	-1.71349	9.131e-06	6.35855e-05
SLC16A1	19.6118	14.0553	14.1319	140.944	37.1244	64.4684	5.1773	2.3722	9.20908e-06	6.40441e-05
MAPK13	4.20253	0	2.35531	20.1349	26.5175	40.7169	11.2326	3.48962	9.20431e-06	6.40441e-05
GCOM1	0	3.51382	2.35531	34.517	74.2489	6.78615	17.5028	4.12952	9.21301e-06	6.40441e-05
TAF15	277.367	333.813	358.007	83.4161	100.766	108.578	-3.34767	-1.74316	9.27227e-06	6.44184e-05
USP14	316.591	346.111	316.789	106.427	121.98	40.7169	-3.73949	-1.90284	9.28355e-06	6.44592e-05
BCL9	49.0296	61.4919	62.4157	11.5057	5.30349	0	-9.22897	-3.20617	9.31046e-06	6.46083e-05
ZNF117	1.40084	0	0	28.7642	95.4628	10.1792	60.7279	5.92429	9.3182e-06	6.46243e-05
NQO2	1.40084	7.02764	2.35531	46.0227	5.30349	54.2892	10.1362	3.34144	9.34275e-06	6.47568e-05
RAB32	58.8355	28.1106	41.2179	146.697	100.766	237.515	3.78889	1.92178	9.44286e-06	6.54126e-05
ATP5F1C	249.35	254.752	262.617	54.6519	79.5524	88.2199	-3.5339	-1.82126	9.46116e-06	6.55012e-05
RRS1	60.2363	63.2488	102.456	11.5057	10.607	16.9654	-5.66417	-2.50186	9.48515e-06	6.56169e-05
SEC14L2	5.60338	5.27073	2.35531	60.4047	10.607	33.9307	8.28784	3.051	9.48891e-06	6.56169e-05
CLSTN1	112.068	82.5748	135.43	417.08	302.299	349.487	3.22785	1.69058	9.64136e-06	6.66324e-05
TDRD7	116.27	149.337	137.786	20.1349	21.214	54.2892	-4.08997	-2.03209	9.6506e-06	6.66575e-05
TMEM168	71.4431	57.978	62.4157	5.75283	21.214	0	-8.61736	-3.10725	9.66144e-06	6.66937e-05
DNAJC16	7.00422	5.27073	1.17765	34.517	68.9454	16.9654	8.45379	3.0796	9.68935e-06	6.68475e-05
SUGP2	19.6118	21.0829	5.88827	63.2811	90.1594	61.0753	4.64286	2.21501	9.69984e-06	6.68811e-05
THEM4	0	1.75691	1.17765	20.1349	26.5175	37.3238	23.5183	4.55571	9.83304e-06	6.77602e-05
SHFL	0	1.75691	0	20.1349	42.4279	44.11	47.5265	5.57066	9.88042e-06	6.80473e-05
MRPS2	7.00422	8.78455	4.71062	40.2698	15.9105	74.6476	6.62641	2.72823	9.90327e-06	6.81476e-05
PHETA1	1.40084	0	0	28.7642	31.8209	37.3238	45.5471	5.50929	9.90644e-06	6.81476e-05
COQ4	0	0	2.35531	20.1349	10.607	74.6476	31.398	4.9726	9.92157e-06	6.82122e-05
PNMA1	0	0	0	126.562	106.07	118.758	477.067	8.89805	9.98016e-06	6.85754e-05
COP1	217.131	217.857	240.242	63.2811	37.1244	78.0407	-3.60768	-1.85107	1.00096e-05	6.8738e-05
PLEKHO2	8.40507	15.8122	18.8425	69.034	37.1244	88.2199	4.62248	2.20867	1.01906e-05	6.99406e-05
OLA1	200.321	173.934	203.734	63.2811	47.7314	67.8615	-3.15935	-1.65963	1.02102e-05	6.99941e-05
SLC12A4	348.81	205.558	221.399	71.9104	79.5524	61.0753	-3.6817	-1.88037	1.02046e-05	6.99941e-05
DGCR6L	9.80591	3.51382	3.53296	11.5057	37.1244	128.937	10.1315	3.34078	1.0238e-05	7.01447e-05
SDC2	50.4304	72.0333	52.9945	2.87642	10.607	6.78615	-9.15934	-3.19524	1.02515e-05	7.01963e-05
ELOA	25.2152	35.1382	34.152	138.068	137.891	67.8615	3.58965	1.84384	1.02865e-05	7.03954e-05
KALRN	85.4515	59.7349	95.39	11.5057	10.607	23.7515	-5.14555	-2.36333	1.02941e-05	7.04069e-05
UBE2K	253.553	247.724	288.525	92.0453	68.9454	61.0753	-3.49482	-1.80522	1.03653e-05	7.08537e-05
WDFY3	289.975	288.133	280.282	86.2925	100.766	13.5723	-4.34263	-2.11857	1.04043e-05	7.10792e-05
RAB18	221.333	173.934	186.069	71.9104	68.9454	33.9307	-3.35553	-1.74654	1.04252e-05	7.11813e-05
COMMD3	169.502	158.122	150.74	40.2698	15.9105	67.8615	-3.55876	-1.83137	1.0441e-05	7.12479e-05
JOSD1	54.6329	33.3813	57.7051	227.237	116.677	159.474	3.47458	1.79684	1.04641e-05	7.13648e-05
MRPL14	8.40507	3.51382	9.42124	37.3934	15.9105	108.578	7.34117	2.87601	1.04743e-05	7.13932e-05
NOL8	1.40084	5.27073	2.35531	34.517	10.607	40.7169	10.2896	3.36312	1.05122e-05	7.16103e-05
CNOT4	91.0549	117.713	93.0347	25.8877	37.1244	13.5723	-4.08054	-2.02876	1.0557e-05	7.18749e-05
SEMA3G	7.00422	0	3.53296	5.75283	116.677	40.7169	13.8958	3.79658	1.07211e-05	7.29082e-05
MED14	208.726	163.393	142.496	37.3934	74.2489	0	-4.72254	-2.23956	1.07192e-05	7.29082e-05
MIER2	4.20253	1.75691	14.1319	86.2925	31.8209	33.9307	7.11949	2.83177	1.08423e-05	7.36906e-05
CARD8	0	0	0	178.338	95.4628	78.0407	475.972	8.89473	1.09307e-05	7.42489e-05
STARD3NL	23.8144	31.6244	31.7967	106.427	90.1594	88.2199	3.29061	1.71835	1.09435e-05	7.42937e-05
CCDC86	18.211	14.0553	4.71062	71.9104	31.8209	71.2546	4.97896	2.31585	1.09509e-05	7.43014e-05
TOPBP1	117.671	80.8179	60.0604	8.62925	31.8209	13.5723	-5.27503	-2.39918	1.09726e-05	7.43639e-05
DIAPH3	77.0464	98.387	95.39	2.87642	0	0	-61.6805	-5.94674	1.09668e-05	7.43639e-05
CTDSPL2	105.063	124.741	80.0805	37.3934	21.214	10.1792	-4.24089	-2.08437	1.10097e-05	7.45723e-05
NR3C1	106.464	122.984	130.72	40.2698	37.1244	16.9654	-3.82687	-1.93616	1.10427e-05	7.47538e-05
TYMS	116.27	108.928	103.634	17.2585	37.1244	37.3238	-3.75746	-1.90976	1.10613e-05	7.48371e-05
FAM50A	51.8312	49.1935	55.3498	120.809	116.677	346.094	3.73756	1.9021	1.10784e-05	7.49097e-05
RRM2	112.068	75.5471	83.6135	2.87642	0	0	-62.2428	-5.95984	1.11179e-05	7.51342e-05
TAP2	14.0084	8.78455	16.4872	31.6406	74.2489	95.0061	4.83924	2.27478	1.12651e-05	7.60857e-05
POLE	134.481	89.6024	89.5018	37.3934	10.607	20.3584	-4.16569	-2.05855	1.1279e-05	7.61368e-05
IL13RA1	0	0	0	115.057	185.622	64.4684	479.439	8.9052	1.12929e-05	7.61868e-05
MED21	56.0338	56.2211	57.7051	5.75283	10.607	6.78615	-7.61734	-2.92929	1.13674e-05	7.66465e-05
HTRA3	0	0	0	28.7642	121.98	240.908	522.341	9.02885	1.14308e-05	7.70299e-05
ECE1	282.971	277.592	301.48	880.183	1087.22	1231.69	3.68775	1.88274	1.14669e-05	7.72292e-05
METRN	4.20253	3.51382	2.35531	25.8877	21.214	40.7169	8.58772	3.10227	1.14863e-05	7.73164e-05
CLK1	151.291	159.879	115.41	37.3934	37.1244	37.3238	-3.74753	-1.90594	1.15206e-05	7.75034e-05
DLG4	180.709	121.227	169.582	48.8991	47.7314	50.8961	-3.20577	-1.68067	1.15485e-05	7.7647e-05
CEP68	12.6076	12.2984	9.42124	37.3934	58.3384	61.0753	4.41704	2.14308	1.15671e-05	7.77281e-05
PPIP5K2	60.2363	103.658	135.43	11.5057	42.4279	3.39307	-5.80938	-2.53838	1.15918e-05	7.78505e-05
CLSTN3	1.40084	0	1.17765	37.3934	21.214	20.3584	23.508	4.55508	1.16861e-05	7.84393e-05
DUSP3	54.6329	50.9504	49.4615	161.079	217.443	132.33	3.16614	1.66272	1.16977e-05	7.84726e-05
IKBIP	9.80591	8.78455	17.6648	60.4047	58.3384	44.11	4.21564	2.07575	1.17118e-05	7.85234e-05
TMEM140	0	0	0	97.7981	100.766	142.509	458.076	8.83944	1.17193e-05	7.85295e-05
KIF20A	35.0211	161.636	115.41	2.87642	0	0	-72.3666	-6.17725	1.17834e-05	7.89143e-05
RBM4	56.0338	47.4366	37.6849	155.326	106.07	166.261	3.17142	1.66513	1.1834e-05	7.92088e-05
UHRF1BP1L	58.8355	103.658	111.877	25.8877	21.214	3.39307	-5.3823	-2.42822	1.19352e-05	7.98409e-05
SYNJ2BP	2.80169	3.51382	0	25.8877	47.7314	16.9654	13.162	3.7183	1.20817e-05	8.07753e-05
GRPEL2	4.20253	7.02764	4.71062	23.0113	74.2489	27.1446	7.10388	2.82861	1.21714e-05	8.13294e-05
SPIRE1	16.8101	3.51382	11.7765	112.18	68.9454	23.7515	6.17308	2.62599	1.21992e-05	8.14695e-05
LIMD1	8.40507	21.0829	16.4872	63.2811	68.9454	61.0753	4.1973	2.06946	1.22262e-05	8.16043e-05
POFUT1	22.4135	15.8122	21.1978	100.675	58.3384	67.8615	3.90018	1.96354	1.2296e-05	8.20236e-05
PPM1F	117.671	68.5195	110.7	273.259	275.782	430.92	3.27958	1.71351	1.2337e-05	8.22511e-05
MPHOSPH8	15.4093	7.02764	15.3095	40.2698	74.2489	67.8615	4.34102	2.11803	1.24047e-05	8.26561e-05
SMARCC2	250.751	242.454	256.729	51.7755	127.284	33.9307	-3.98758	-1.99551	1.2644e-05	8.42035e-05
TIMM22	9.80591	17.5691	7.06593	34.517	53.0349	78.0407	4.89992	2.29276	1.26616e-05	8.42734e-05
SSH3	2.80169	0	0	23.0113	31.8209	27.1446	22.5069	4.49229	1.27308e-05	8.45923e-05
SNRPA1	95.2574	82.5748	84.7911	17.2585	10.607	27.1446	-4.50724	-2.17224	1.27201e-05	8.45923e-05
SULT1A3	0	1.75691	0	20.1349	21.214	64.4684	49.4027	5.62652	1.2728e-05	8.45923e-05
PHRF1	37.8228	35.1382	34.152	138.068	84.8559	108.578	3.2219	1.68791	1.27382e-05	8.45944e-05
MPP1	163.899	209.072	257.906	46.0227	21.214	88.2199	-3.87773	-1.95521	1.27527e-05	8.46432e-05
DELE1	33.6203	22.8398	14.1319	83.4161	63.6419	125.544	3.95012	1.9819	1.28431e-05	8.51958e-05
CALCOCO2	0	0	0	112.18	116.677	101.792	438.854	8.7776	1.28969e-05	8.55052e-05
CC2D2A	43.4262	108.928	58.8827	8.62925	5.30349	10.1792	-8.11709	-3.02096	1.29109e-05	8.55501e-05
MARVELD1	15.4093	21.0829	22.3754	63.2811	58.3384	132.33	4.33073	2.11461	1.2921e-05	8.5569e-05
MTMR4	119.072	122.984	110.7	37.3934	42.4279	16.9654	-3.71075	-1.89171	1.29646e-05	8.58102e-05
CEPT1	78.4473	93.1162	70.6593	14.3821	31.8209	6.78615	-5.00156	-2.32238	1.29742e-05	8.58261e-05
USP7	438.464	465.581	420.423	158.203	153.801	74.6476	-3.43791	-1.78153	1.3051e-05	8.62863e-05
TP53I13	0	5.27073	3.53296	25.8877	15.9105	44.11	9.88733	3.30558	1.31253e-05	8.67289e-05
ZFP62	63.038	79.061	55.3498	14.3821	0	6.78615	-7.43701	-2.89472	1.31442e-05	8.67985e-05
C15orf40	0	3.51382	0	25.8877	15.9105	37.3238	23.5062	4.55497	1.31504e-05	8.67985e-05
FKBP5	75.6456	65.0057	57.7051	17.2585	5.30349	0	-7.59399	-2.92486	1.31802e-05	8.69467e-05
EIF2S1	240.945	272.321	268.505	71.9104	100.766	64.4684	-3.42249	-1.77505	1.32017e-05	8.70403e-05
AKAP17A	12.6076	8.78455	14.1319	117.933	37.1244	37.3238	5.41745	2.43761	1.32445e-05	8.72741e-05
SUCO	186.312	156.365	147.207	66.1576	58.3384	20.3584	-3.37697	-1.75573	1.32968e-05	8.75523e-05
CFL2	156.895	214.343	161.339	48.8991	90.1594	23.7515	-3.49154	-1.80386	1.33014e-05	8.75523e-05
IQGAP3	58.8355	131.768	84.7911	2.87642	0	0	-62.833	-5.97345	1.33302e-05	8.76932e-05
SRD5A3	1.40084	1.75691	2.35531	17.2585	37.1244	30.5377	12.5813	3.65321	1.3375e-05	8.79393e-05
TCN2	23.8144	12.2984	17.6648	57.5283	53.0349	111.971	4.10209	2.03636	1.33868e-05	8.79683e-05
TM4SF18	0	0	0	71.9104	190.926	84.8268	453.815	8.82596	1.34246e-05	8.81682e-05
JMJD4	1.40084	0	1.17765	14.3821	31.8209	40.7169	23.8832	4.57793	1.34461e-05	8.82603e-05
RND1	98.0591	36.8951	55.3498	8.62925	5.30349	3.39307	-10.2593	-3.35886	1.34817e-05	8.8445e-05
TMEM255B	0	0	0	77.6632	58.3384	213.764	470.454	8.87791	1.34898e-05	8.84496e-05
FAM104A	22.4135	10.5415	17.6648	71.9104	74.2489	57.6823	3.84464	1.94285	1.35145e-05	8.85631e-05
TNFRSF25	0	1.75691	0	17.2585	42.4279	44.11	46.331	5.53391	1.35924e-05	8.90242e-05
IREB2	134.481	133.525	174.293	34.517	68.9454	10.1792	-4.30464	-2.10589	1.36438e-05	8.92684e-05
FAM210B	0	0	0	69.034	106.07	156.081	440.658	8.78352	1.36447e-05	8.92684e-05
TENT2	75.6456	93.1162	107.167	34.517	10.607	0	-5.48	-2.45418	1.36794e-05	8.94461e-05
IFI27L2	5.60338	3.51382	3.53296	28.7642	10.607	81.4338	9.30867	3.21857	1.37245e-05	8.9692e-05
APOL2	0	0	0	86.2925	68.9454	179.833	451.991	8.82015	1.37858e-05	9.00427e-05
TAPT1	82.6498	94.8731	65.9487	8.62925	31.8209	13.5723	-5.01106	-2.32511	1.38045e-05	9.01158e-05
EIF4ENIF1	103.662	93.1162	101.278	31.6406	26.5175	20.3584	-3.74489	-1.90492	1.38176e-05	9.01518e-05
VRK3	9.80591	8.78455	9.42124	37.3934	31.8209	71.2546	5.01991	2.32766	1.38764e-05	9.04859e-05
FLOT2	0	0	0	112.18	63.6419	142.509	436.747	8.77065	1.40176e-05	9.13565e-05
LAPTM5	0	0	0	80.5396	74.2489	176.44	446.051	8.80107	1.40372e-05	9.13828e-05
MYBL1	79.8481	89.6024	87.1464	0	5.30349	0	-58.4673	-5.86956	1.40314e-05	9.13828e-05
PHKA1	61.6372	61.4919	49.4615	11.5057	5.30349	3.39307	-7.62402	-2.93055	1.40447e-05	9.13828e-05
GSK3B	303.983	254.752	242.597	80.5396	100.766	61.0753	-3.39607	-1.76387	1.40699e-05	9.14965e-05
DNAJC14	142.886	98.387	108.344	34.517	37.1244	23.7515	-3.71447	-1.89315	1.41371e-05	9.18835e-05
RBM26	128.878	137.039	167.227	46.0227	37.1244	37.3238	-3.54904	-1.82743	1.41752e-05	9.20808e-05
SERPINE2	0	0	0	100.675	148.498	88.2199	430.957	8.7514	1.42033e-05	9.21768e-05
PMP22	100.861	101.901	118.943	230.113	344.727	515.747	3.37204	1.75362	1.42055e-05	9.21768e-05
RPL21	170.903	149.337	181.359	474.609	339.423	1621.89	4.85587	2.27973	1.42206e-05	9.22244e-05
CYP51A1	273.165	112.442	109.522	57.5283	31.8209	20.3584	-4.40523	-2.13922	1.42399e-05	9.22488e-05
MPDU1	16.8101	24.5967	22.3754	103.551	31.8209	128.937	4.26936	2.09402	1.42372e-05	9.22488e-05
FBXL14	56.0338	52.7073	52.9945	8.62925	0	3.39307	-10.6801	-3.41685	1.42493e-05	9.22597e-05
PEF1	9.80591	28.1106	14.1319	57.5283	53.0349	128.937	4.71418	2.23701	1.43432e-05	9.27162e-05
DEAF1	16.8101	15.8122	18.8425	40.2698	63.6419	159.474	5.05785	2.33852	1.43393e-05	9.27162e-05
CAPRIN2	2.80169	0	5.88827	34.517	42.4279	20.3584	8.93401	3.15931	1.43354e-05	9.27162e-05
RORA	0	0	1.17765	40.2698	74.2489	6.78615	56.4495	5.81889	1.44252e-05	9.3196e-05
SLC30A4	67.2405	75.5471	62.4157	17.2585	10.607	3.39307	-6.11567	-2.61251	1.4509e-05	9.36865e-05
KRIT1	81.249	89.6024	93.0347	23.0113	15.9105	20.3584	-4.26746	-2.09338	1.45433e-05	9.38567e-05
MBNL2	396.439	260.023	231.998	109.304	53.0349	6.78615	-5.18753	-2.37505	1.45516e-05	9.38592e-05
KBTBD2	137.283	154.608	141.319	51.7755	42.4279	20.3584	-3.71057	-1.89164	1.46776e-05	9.46206e-05
TTC14	95.2574	103.658	109.522	28.7642	42.4279	16.9654	-3.6995	-1.88733	1.47081e-05	9.47663e-05
POLR3D	11.2068	3.51382	11.7765	48.8991	47.7314	44.11	4.90245	2.2935	1.47779e-05	9.51643e-05
DDX39B	374.025	272.321	287.348	86.2925	90.1594	108.578	-3.27091	-1.70969	1.48178e-05	9.53697e-05
ME1	177.907	114.199	162.516	54.6519	47.7314	16.9654	-3.82628	-1.93594	1.49345e-05	9.60685e-05
FMC1-LUC7L2	65.8397	180.962	90.6794	31.6406	0	27.1446	-5.22262	-2.38477	1.49665e-05	9.62191e-05
GPATCH2L	9.80591	7.02764	7.06593	60.4047	53.0349	23.7515	5.58122	2.48058	1.49741e-05	9.62191e-05
ZNF84	0	0	1.17765	28.7642	37.1244	27.1446	42.2084	5.39946	1.50813e-05	9.68556e-05
TPD52L2	75.6456	79.061	73.0146	244.495	180.319	193.405	2.79463	1.48266	1.51417e-05	9.71668e-05
BGN	0	0	0	103.551	148.498	71.2546	420.181	8.71487	1.51461e-05	9.71668e-05
MTIF3	4.20253	1.75691	0	20.1349	15.9105	47.503	13.449	3.74943	1.5239e-05	9.77105e-05
EEA1	161.097	142.31	149.562	46.0227	58.3384	3.39307	-4.46594	-2.15896	1.52626e-05	9.77564e-05
ZFYVE26	14.0084	26.3537	38.8626	100.675	121.98	84.8268	3.73264	1.90019	1.52579e-05	9.77564e-05
MBD4	1.40084	3.51382	3.53296	37.3934	21.214	20.3584	9.11516	3.18827	1.52995e-05	9.79398e-05
C2orf68	0	1.75691	0	34.517	26.5175	27.1446	42.1868	5.39872	1.5349e-05	9.81879e-05
ZNF185	0	0	0	163.956	68.9454	84.8268	433.092	8.75853	1.53548e-05	9.81879e-05
PHF10	99.46	144.067	124.831	23.0113	42.4279	37.3238	-3.71769	-1.89441	1.53696e-05	9.82298e-05
SLC37A2	0	1.75691	2.35531	37.3934	15.9105	20.3584	16.1267	4.01138	1.53962e-05	9.83472e-05
UBE2V2	95.2574	107.172	95.39	25.8877	31.8209	23.7515	-3.69425	-1.88528	1.54468e-05	9.86174e-05
DRG1	179.308	135.282	150.74	34.517	15.9105	67.8615	-3.69365	-1.88505	1.55419e-05	9.91712e-05
TCTN3	9.80591	14.0553	16.4872	54.6519	68.9454	44.11	3.93055	1.97473	1.55965e-05	9.94666e-05
NXPE3	4.20253	7.02764	7.06593	51.7755	26.5175	30.5377	6.10506	2.61	1.56865e-05	9.99866e-05
UQCC2	103.662	98.387	93.0347	14.3821	10.607	40.7169	-4.25086	-2.08775	1.57007e-05	0.000100023
CREBL2	4.20253	1.75691	2.35531	43.1462	42.4279	10.1792	10.3618	3.3732	1.57214e-05	0.000100102
SLC35D2	9.80591	5.27073	3.53296	40.2698	15.9105	61.0753	6.49375	2.69905	1.57589e-05	0.000100287
NRGN	5.60338	1.75691	5.88827	25.8877	5.30349	128.937	11.4078	3.51195	1.58856e-05	0.000101039
VLDLR	100.861	68.5195	62.4157	23.0113	15.9105	0	-5.76825	-2.52813	1.59249e-05	0.000101235
CHCHD1	4.20253	7.02764	1.17765	14.3821	26.5175	81.4338	9.85847	3.30136	1.59597e-05	0.000101402
NDUFS2	315.19	361.923	339.165	77.6632	79.5524	142.509	-3.33203	-1.7364	1.60672e-05	0.000101996
HPS4	5.60338	1.75691	4.71062	37.3934	15.9105	37.3238	7.32285	2.8724	1.60703e-05	0.000101996
DHRS7	0	0	1.17765	25.8877	15.9105	54.2892	46.6419	5.54356	1.61453e-05	0.000102417
SETD5	438.464	381.25	413.357	161.079	132.587	50.8961	-3.57748	-1.83894	1.62171e-05	0.000102817
CCNB1	26.616	94.8731	70.6593	8.62925	0	3.39307	-13.0245	-3.70316	1.62322e-05	0.000102859
PILRB	0	0	0	66.1576	137.891	111.971	410.472	8.68114	1.62702e-05	0.000103044
RAB3B	0	0	0	129.439	137.891	50.8961	421.71	8.72011	1.63068e-05	0.000103221
NUCB2	36.422	65.0057	83.6135	235.866	196.229	145.902	3.10775	1.63587	1.63687e-05	0.000103558
TP53I3	0	0	0	51.7755	53.0349	240.908	463.769	8.85726	1.64968e-05	0.000104313
ADSS2	190.515	195.017	201.379	28.7642	95.4628	64.4684	-3.44815	-1.78582	1.66605e-05	0.000105239
NDUFV3	2.80169	1.75691	3.53296	14.3821	26.5175	54.2892	10.4901	3.39096	1.66608e-05	0.000105239
NUP54	84.0507	65.0057	76.5476	23.0113	10.607	10.1792	-4.79177	-2.26056	1.66755e-05	0.000105275
RER1	81.249	73.7902	67.1263	175.461	180.319	247.694	2.73925	1.45378	1.67059e-05	0.000105411
RHOF	2.80169	3.51382	3.53296	43.1462	21.214	20.3584	8.58501	3.10182	1.67443e-05	0.000105598
ASAH1	74.2448	80.8179	88.3241	5.75283	21.214	27.1446	-4.78091	-2.25729	1.70008e-05	0.000107158
PKIG	22.4135	21.0829	18.8425	71.9104	42.4279	152.688	4.34914	2.12073	1.70228e-05	0.00010724
PPP6R2	30.8186	26.3537	32.9743	77.6632	90.1594	156.081	3.55594	1.83023	1.7051e-05	0.000107361
KIFC3	30.8186	15.8122	20.0201	80.5396	63.6419	108.578	3.81708	1.93247	1.70876e-05	0.000107535
PDZD8	121.873	135.282	113.055	31.6406	58.3384	6.78615	-4.1938	-2.06826	1.7123e-05	0.0001077
IL4R	0	0	0	77.6632	132.587	101.792	398.223	8.63743	1.71402e-05	0.000107751
PAPOLA	326.397	340.841	432.199	117.933	153.801	64.4684	-3.37363	-1.7543	1.71716e-05	0.000107891
CYLD	243.747	177.448	227.287	57.5283	100.766	33.9307	-3.61794	-1.85517	1.72413e-05	0.000108272
MOAP1	7.00422	7.02764	4.71062	37.3934	31.8209	30.5377	5.34879	2.41921	1.73032e-05	0.000108604
DEXI	5.60338	1.75691	7.06593	31.6406	15.9105	64.4684	7.33442	2.87468	1.73444e-05	0.000108805
POLR2E	30.8186	49.1935	49.4615	146.697	84.8559	159.474	3.12247	1.64269	1.74398e-05	0.000109346
ATP9B	91.0549	63.2488	70.6593	23.0113	15.9105	3.39307	-5.15186	-2.36509	1.74901e-05	0.000109603
GIMAP6	0	0	0	54.6519	127.284	128.937	408.834	8.67537	1.75733e-05	0.000110026
APLP2	988.996	774.797	829.069	3054.75	3500.3	2734.82	3.56908	1.83555	1.7576e-05	0.000110026
gene:ENSG00000284292	29.4177	107.172	68.304	5.75283	0	0	-26.2286	-4.71307	1.76836e-05	0.000110641
TAP1	18.211	26.3537	22.3754	54.6519	79.5524	132.33	3.96927	1.98887	1.7719e-05	0.000110804
TRIM47	9.80591	12.2984	4.71062	31.6406	31.8209	88.2199	5.78631	2.53264	1.7863e-05	0.000111646
DICER1	149.89	180.962	216.688	54.6519	79.5524	6.78615	-3.99157	-1.99695	1.78768e-05	0.000111673
NMD3	92.4557	93.1162	78.9029	23.0113	26.5175	13.5723	-4.2246	-2.07882	1.79932e-05	0.000112342
SRF	141.485	142.31	122.476	28.7642	37.1244	47.503	-3.5795	-1.83976	1.8185e-05	0.00011348
GBP2	0	0	0	57.5283	53.0349	213.764	435.619	8.76692	1.82486e-05	0.000113817
GPNMB	0	0	0	83.4161	137.891	88.2199	392.841	8.6178	1.8292e-05	0.000113968
PTDSS2	23.8144	33.3813	18.8425	51.7755	95.4628	162.868	4.09067	2.03234	1.82897e-05	0.000113968
MIB2	7.00422	5.27073	7.06593	37.3934	10.607	78.0407	6.48566	2.69725	1.83486e-05	0.000114201
RUVBL2	114.869	121.227	142.496	34.517	26.5175	44.11	-3.51223	-1.81239	1.83442e-05	0.000114201
DDX1	282.971	295.161	303.835	92.0453	100.766	95.0061	-3.09029	-1.62774	1.8379e-05	0.000114331
LAMTOR5	14.0084	10.5415	27.0861	46.0227	79.5524	132.33	4.80598	2.26483	1.84653e-05	0.000114807
NDC1	46.2279	66.7626	50.6391	8.62925	5.30349	3.39307	-8.56243	-3.09802	1.85198e-05	0.000115086
MRS2	4.20253	1.75691	2.35531	17.2585	37.1244	33.9307	9.12271	3.18946	1.85945e-05	0.00011549
ELMOD3	2.80169	5.27073	0	17.2585	26.5175	40.7169	10.7439	3.42545	1.86985e-05	0.000116075
BUB1	47.6287	107.172	100.101	0	0	3.39307	-58.1209	-5.86099	1.90017e-05	0.000117896
SLC39A14	15.4093	10.5415	14.1319	307.776	37.1244	13.5723	8.84565	3.14497	1.9019e-05	0.000117941
USP22	93.8566	96.6301	94.2124	313.529	286.389	257.874	3.02883	1.59876	1.9054e-05	0.000118097
MAP3K20	71.4431	82.5748	74.1922	23.0113	15.9105	6.78615	-4.76532	-2.25257	1.91151e-05	0.000118414
DSE	123.274	154.608	163.694	60.4047	26.5175	3.39307	-4.72913	-2.24158	1.91413e-05	0.000118453
ACO2	369.823	361.923	453.397	129.439	63.6419	145.902	-3.33199	-1.73638	1.91319e-05	0.000118453
FAM171A2	29.4177	80.8179	95.39	8.62925	5.30349	6.78615	-9.28704	-3.21522	1.91526e-05	0.000118456
ZFX	64.4388	91.3593	82.4358	20.1349	21.214	10.1792	-4.62102	-2.20821	1.91617e-05	0.000118456
RCN3	0	0	0	97.7981	47.7314	145.902	396.752	8.63209	1.92646e-05	0.00011903
CNEP1R1	47.6287	72.0333	56.5274	8.62925	10.607	6.78615	-6.67467	-2.7387	1.92777e-05	0.000119049
DAB2IP	207.325	170.42	203.734	43.1462	95.4628	57.6823	-3.24007	-1.69603	1.93941e-05	0.000119706
NFIX	57.4346	54.4642	47.1062	2.87642	5.30349	6.78615	-10.4037	-3.37903	1.94512e-05	0.000119996
DEF6	50.4304	52.7073	63.5934	2.87642	0	3.39307	-21.1821	-4.40478	1.9528e-05	0.000120407
RBMX2	0	7.02764	2.35531	34.517	37.1244	16.9654	9.51009	3.24946	1.96242e-05	0.000120938
POLRMT	5.60338	1.75691	10.5989	37.3934	15.9105	81.4338	7.09213	2.82622	1.97597e-05	0.000121647
SAFB2	22.4135	17.5691	24.7307	80.5396	74.2489	84.8268	3.62919	1.85965	1.97562e-05	0.000121647
CRAT	8.40507	24.5967	20.0201	71.9104	53.0349	74.6476	3.90944	1.96696	1.98083e-05	0.000121883
EPB41	15.4093	21.0829	20.0201	97.7981	111.373	40.7169	4.30471	2.10592	1.99602e-05	0.000122628
GABPA	57.4346	77.304	91.8571	23.0113	15.9105	3.39307	-5.19503	-2.37713	1.99487e-05	0.000122628
WASH6P	7.00422	10.5415	3.53296	57.5283	10.607	54.2892	6.22763	2.63868	1.99504e-05	0.000122628
AK1	22.4135	10.5415	12.9542	46.0227	42.4279	176.44	5.72111	2.5163	2.02177e-05	0.000124145
ADAMTS4	68.6414	168.663	204.912	43.1462	21.214	30.5377	-4.48919	-2.16645	2.02429e-05	0.000124236
PLEKHG2	8.40507	15.8122	5.88827	37.3934	42.4279	61.0753	4.8992	2.29254	2.02577e-05	0.000124263
COX6C	0	0	0	66.1576	53.0349	179.833	402.754	8.65375	2.03575e-05	0.00012481
RNF139	98.0591	93.1162	70.6593	20.1349	37.1244	0	-5.04398	-2.33456	2.03991e-05	0.000125001
AHNAK2	112.068	112.442	147.207	624.182	376.548	254.481	3.37904	1.75661	2.04592e-05	0.000125305
TCEAL4	0	0	0	80.5396	68.9454	135.723	386.73	8.59518	2.04828e-05	0.000125385
GAPVD1	217.131	195.017	206.09	77.6632	74.2489	23.7515	-3.56747	-1.8349	2.05228e-05	0.000125565
NMRAL1	11.2068	8.78455	5.88827	31.6406	26.5175	88.2199	5.69731	2.51028	2.07584e-05	0.000126941
SNX29	8.40507	7.02764	8.24358	31.6406	58.3384	37.3238	4.86454	2.2823	2.07944e-05	0.000127096
ASRGL1	0	0	3.53296	20.1349	31.8209	27.1446	15.4146	3.94623	2.10495e-05	0.00012856
gene:ENSG00000267059	74.2448	87.8455	85.9688	20.1349	10.607	23.7515	-4.24341	-2.08522	2.10556e-05	0.00012856
ITGA1	5.60338	1.75691	3.53296	11.5057	95.4628	23.7515	10.6284	3.40985	2.10925e-05	0.000128719
QPCT	0	3.51382	1.17765	31.6406	15.9105	23.7515	15.4008	3.94493	2.1345e-05	0.000130193
DAXX	21.0127	22.8398	18.8425	63.2811	68.9454	95.0061	3.64229	1.86485	2.17572e-05	0.00013264
PCDH1	451.072	325.028	407.469	112.18	143.194	128.937	-3.14396	-1.65258	2.17852e-05	0.000132742
GALNS	18.211	7.02764	10.5989	63.2811	37.1244	50.8961	4.27406	2.09561	2.18441e-05	0.000133033
PPRC1	107.865	114.199	100.101	37.3934	26.5175	27.1446	-3.38513	-1.75921	2.19333e-05	0.000133508
GLIPR1	0	7.02764	2.35531	40.2698	21.214	20.3584	9.42159	3.23597	2.19458e-05	0.000133516
CAB39	189.114	207.315	175.471	74.7868	68.9454	33.9307	-3.19172	-1.67433	2.20396e-05	0.000134018
RUSC1	9.80591	3.51382	9.42124	34.517	26.5175	67.8615	5.45098	2.44651	2.21815e-05	0.000134752
H1-10	0	0	0	74.7868	79.5524	125.544	376.228	8.55546	2.21877e-05	0.000134752
PRORP	4.20253	0	3.53296	37.3934	26.5175	16.9654	9.11756	3.18865	2.21943e-05	0.000134752
NIFK	0	3.51382	2.35531	23.0113	37.1244	20.3584	12.0127	3.58649	2.22437e-05	0.000134947
PAFAH1B1	662.599	551.67	599.426	158.203	249.264	135.723	-3.50615	-1.80989	2.22491e-05	0.000134947
PKIA	0	1.75691	0	51.7755	21.214	16.9654	43.2506	5.43465	2.23715e-05	0.000135551
RAP1B	574.346	597.349	578.228	209.978	180.319	50.8961	-3.97205	-1.98988	2.23643e-05	0.000135551
ARHGAP5	124.675	159.879	156.628	37.3934	68.9454	6.78615	-4.28555	-2.09948	2.23961e-05	0.000135631
SRSF10	120.473	124.741	118.943	25.8877	63.6419	20.3584	-3.69945	-1.88731	2.24626e-05	0.00013587
NUP188	214.329	209.072	227.287	60.4047	95.4628	44.11	-3.469	-1.79452	2.24623e-05	0.00013587
ACP5	0	0	0	37.3934	37.1244	257.874	445.77	8.80015	2.24699e-05	0.00013587
ATAD1	116.27	101.901	109.522	31.6406	37.1244	30.5377	-3.35687	-1.74712	2.25159e-05	0.000136079
ADIRF	0	0	0	97.7981	31.8209	159.474	391.464	8.61274	2.26005e-05	0.000136521
NQO1	704.625	293.404	451.042	1458.34	1564.53	2836.61	4.04046	2.01452	2.27214e-05	0.000137182
TUBA1A	1145.89	952.245	1050.47	161.079	233.354	410.562	-3.90814	-1.96648	2.29079e-05	0.000138238
UQCRB	65.8397	45.6797	63.5934	146.697	111.373	329.128	3.35944	1.74822	2.297e-05	0.000138542
TICAM1	0	0	2.35531	17.2585	21.214	40.7169	22.6129	4.49908	2.30083e-05	0.000138703
TTC13	96.6583	103.658	93.0347	23.0113	42.4279	20.3584	-3.64035	-1.86408	2.30655e-05	0.000138977
TOP2B	231.139	272.321	277.926	63.2811	121.98	64.4684	-3.36588	-1.75098	2.31701e-05	0.000139537
SLC16A6	5.60338	10.5415	2.35531	34.517	47.7314	27.1446	5.98136	2.58047	2.3198e-05	0.000139634
TBC1D17	16.8101	8.78455	14.1319	51.7755	26.5175	98.3991	4.45641	2.15588	2.32098e-05	0.000139634
WDR77	124.675	87.8455	123.654	23.0113	37.1244	40.7169	-3.47256	-1.796	2.35884e-05	0.00014184
ANTXR2	138.684	187.989	226.11	74.7868	47.7314	47.503	-3.15923	-1.65957	2.36806e-05	0.000142251
USP16	74.2448	119.47	118.943	23.0113	47.7314	16.9654	-3.84244	-1.94202	2.36783e-05	0.000142251
MRPL55	0	0	1.17765	25.8877	10.607	54.2892	44.3917	5.47222	2.37762e-05	0.000142753
RAB21	106.464	110.685	93.0347	34.517	42.4279	3.39307	-4.01628	-2.00586	2.38002e-05	0.000142825
TAF2	124.675	86.0886	126.009	34.517	47.7314	3.39307	-4.17368	-2.06132	2.39088e-05	0.000143405
PCNX4	8.40507	10.5415	10.5989	60.4047	90.1594	16.9654	5.38752	2.42962	2.41924e-05	0.000145032
PPP2CB	280.169	295.161	302.657	115.057	90.1594	71.2546	-3.11728	-1.64029	2.42331e-05	0.000145203
CENPT	12.6076	14.0553	8.24358	43.1462	37.1244	64.4684	4.30914	2.1074	2.4351e-05	0.000145836
HPSE	0	0	0	158.203	47.7314	71.2546	377.485	8.56027	2.44589e-05	0.000146409
CCDC69	0	0	0	69.034	63.6419	142.509	371.492	8.53719	2.47082e-05	0.000147827
IPO7	804.085	874.941	893.84	244.495	312.906	115.365	-3.87764	-1.95518	2.49899e-05	0.000149437
ZNF544	1.40084	0	0	23.0113	21.214	40.7169	40.5217	5.34062	2.50318e-05	0.000149612
SGCB	7.00422	8.78455	12.9542	34.517	90.1594	37.3238	5.06683	2.34108	2.50935e-05	0.00014983
SURF6	5.60338	3.51382	4.71062	31.6406	15.9105	44.11	6.62798	2.72857	2.50814e-05	0.00014983
TOP3A	9.80591	10.5415	9.42124	40.2698	58.3384	40.7169	4.43656	2.14944	2.51476e-05	0.000150078
COX4I1	110.667	86.0886	88.3241	232.99	169.712	838.089	4.3551	2.12271	2.52761e-05	0.000150769
C1orf115	0	0	0	69.034	68.9454	132.33	364.538	8.50993	2.55794e-05	0.000152502
VASP	263.359	379.493	407.469	138.068	53.0349	101.792	-3.43532	-1.78044	2.56539e-05	0.000152869
CAPRIN1	1101.06	1098.07	1221.23	348.046	376.548	111.971	-4.10758	-2.03829	2.5678e-05	0.000152936
WWC3	0	0	0	89.1689	116.677	71.2546	357.258	8.48082	2.57105e-05	0.000153053
ETF1	424.456	430.443	407.469	155.326	153.801	95.0061	-3.13701	-1.64939	2.58158e-05	0.000153546
[truncated: 19,487 more rows]

## Sheet: fold change
Name	HBMEC-Satic#1	HBMEC-Satic#2	HBMEC-Satic#3	HBMEC-Flow#1	HBMEC-Flow#2	HBMEC-Flow#3	Fold change	Log fold change	P-value	FDR p-value
MMP1	0	0	0	21181.9	13115.5	15146.7	65900.5	16.008	3.02055e-15	2.53003e-13
MT-CO2	0	0	0	3316.51	4762.54	7386.72	20608.8	14.331	1.73547e-12	8.00063e-11
CD59	0	0	0	2111.29	2932.83	3562.73	11463.9	13.4848	2.88018e-11	9.75977e-10
ANPEP	0	0	0	1651.06	1071.31	1506.52	5658.44	12.4662	7.73999e-10	1.87113e-08
MMRN1	0	0	0	581.036	1739.55	369.845	3579.84	11.8057	8.15211e-09	1.48942e-07
DKK3	0	0	0	776.632	922.807	922.916	3465.84	11.759	5.82013e-09	1.10406e-07
MDK	0	0	0	227.237	493.225	1784.76	3341.15	11.7061	1.32286e-08	2.26065e-07
CD99	0	0	0	555.148	472.011	1190.97	2961.32	11.532	1.24965e-08	2.15098e-07
MT-ND4L	0	0	0	736.362	1219.8	111.971	2754.74	11.4277	2.93213e-08	4.4654e-07
HSPB1	0	0	0	267.507	212.14	1479.38	2614.31	11.3522	3.57245e-08	5.2718e-07
EFEMP1	0	0	0	724.857	795.524	444.493	2611.46	11.3506	1.84033e-08	2.97e-07
GDF15	0	0	0	655.823	355.334	668.436	2253.09	11.1377	3.30693e-08	4.92891e-07
TFPI2	0	0	0	471.732	604.598	458.065	2009.87	10.9729	4.88244e-08	6.94638e-07
MT-ND3	0	0	0	342.293	397.762	732.904	1966.09	10.9411	5.982e-08	8.27325e-07
HHIP	0	0	0	500.496	498.528	396.99	1854.03	10.8564	6.59385e-08	9.02501e-07
RGS5	0	0	0	509.126	615.205	271.446	1854.02	10.8564	7.41891e-08	1.00159e-06
RPS4Y1	0	0	0	264.63	201.533	858.448	1769.31	10.789	1.23422e-07	1.54524e-06
LDHB	0	0	0	385.44	238.657	580.216	1613.99	10.6564	1.34836e-07	1.67231e-06
CSTB	0	0	0	385.44	106.07	624.326	1492.73	10.5437	2.42395e-07	2.7775e-06
PTX3	0	0	0	750.744	212.14	145.902	1482.78	10.5341	2.68385e-07	3.04016e-06
HTRA1	0	0	0	235.866	334.12	536.106	1474.7	10.5262	1.89193e-07	2.23684e-06
CLEC14A	0	0	0	204.226	233.354	637.898	1436.49	10.4883	2.46394e-07	2.8179e-06
IFI27	0	0	0	189.843	175.015	668.436	1380.68	10.4312	3.07953e-07	3.42317e-06
RNASE1	0	0	0	83.4161	201.533	644.684	1240.78	10.277	5.33937e-07	5.55612e-06
LTBP2	0	0	0	348.046	307.602	190.012	1127.14	10.1385	4.35288e-07	4.65168e-06
TNFAIP8L3	0	0	0	284.765	201.533	305.377	1081.69	10.0791	4.83371e-07	5.10588e-06
SEL1L3	0	0	0	302.024	344.727	166.261	1077.75	10.0738	5.26901e-07	5.49733e-06
MT-ATP8	0	0	0	253.125	450.797	74.6476	1034.11	10.0142	9.11533e-07	8.67342e-06
FCGRT	0	0	0	189.843	143.194	434.313	1027.83	10.0054	7.61773e-07	7.47568e-06
SPOCK1	0	0	0	356.676	254.568	145.902	1012.11	9.98314	7.10563e-07	7.06642e-06
GPC1	0	0	0	181.214	212.14	359.666	1006.31	9.97486	7.33779e-07	7.25483e-06
CASP4	0	0	0	230.113	190.926	308.77	985.51	9.94473	7.53231e-07	7.41633e-06
FBN1	0	0	0	307.776	360.637	71.2546	984.124	9.9427	1.04553e-06	9.7687e-06
BMP6	0	0	0	267.507	312.906	142.509	957.819	9.90361	8.96143e-07	8.54064e-06
CLU	0	0	0	106.427	201.533	390.203	931.239	9.86301	1.17299e-06	1.07154e-05
IL1RL1	0	0	0	532.137	84.8559	78.0407	931.13	9.86284	1.74581e-06	1.50033e-05
SLC38A1	0	0	0	454.474	228.05	13.5723	929.752	9.8607	2.35032e-06	1.94265e-05
TNFRSF10D	0	0	0	299.147	222.747	156.081	908.199	9.82686	1.07849e-06	1.00373e-05
NRCAM	0	0	0	365.305	270.478	44.11	907.115	9.82514	1.68595e-06	1.46066e-05
TNFRSF14	0	0	0	115.057	137.891	390.203	860.094	9.74835	1.56823e-06	1.37444e-05
SLC16A3	0	0	0	212.855	111.373	312.163	856.759	9.74275	1.39456e-06	1.2462e-05
CD46	0	0	0	184.091	360.637	101.792	855.042	9.73985	1.51716e-06	1.33667e-05
TACSTD2	0	0	0	60.4047	344.727	234.122	847.8	9.72758	1.8206e-06	1.55674e-05
F2R	0	0	0	198.473	286.389	156.081	839.95	9.71416	1.35869e-06	1.21689e-05
SRPX	0	0	0	224.36	169.712	217.157	837.055	9.70918	1.30382e-06	1.17482e-05
IGFBP2	0	0	0	152.45	121.98	349.487	836.549	9.70831	1.59662e-06	1.39531e-05
NDUFS5	0	0	0	120.809	53.0349	430.92	809.769	9.66137	2.55127e-06	2.09131e-05
MFAP2	0	0	0	146.697	143.194	305.377	798.014	9.64027	1.69623e-06	1.46621e-05
TRIM22	0	0	0	140.944	291.692	166.261	784.907	9.61638	1.73605e-06	1.49519e-05
PGAP6	0	0	0	178.338	164.408	230.729	775.03	9.59811	1.66392e-06	1.44604e-05
ICAM1	0	0	0	204.226	175.015	173.047	746.207	9.54343	1.87266e-06	1.59552e-05
FAM174B	0	0	0	166.832	148.498	210.371	712.684	9.47712	2.24864e-06	1.8703e-05
SPHK1	0	0	0	230.113	84.8559	206.978	706.378	9.4643	2.62452e-06	2.14839e-05
MMP2	0	0	1.17765	362.428	509.135	627.719	695.28	9.44145	1.79347e-14	1.31676e-12
PTGR1	0	1.75691	2.35531	825.531	954.628	1635.46	689.494	9.42939	1.15737e-25	6.55513e-23
MGP	0	0	0	57.5283	169.712	278.232	673.255	9.39501	3.99008e-06	3.11404e-05
SNCA	0	0	0	166.832	185.622	156.081	670.006	9.38803	2.83899e-06	2.30491e-05
PLOD1	1.40084	0	0	468.856	355.334	587.002	659.66	9.36558	2.17807e-14	1.5606e-12
LOX	0	0	0	371.058	79.5524	30.5377	645.147	9.33348	6.47506e-06	4.71613e-05
ANGPTL4	0	0	0	120.809	148.498	213.764	644.434	9.33189	3.50823e-06	2.78365e-05
C1QTNF5	0	0	0	54.6519	100.766	325.735	643.289	9.32932	5.34181e-06	4.00098e-05
IFITM3	0	0	1.17765	247.372	185.622	892.378	627.427	9.2933	5.21837e-13	2.72225e-11
TRNP1	0	0	0	186.967	68.9454	200.191	617.509	9.27032	4.51627e-06	3.46198e-05
ERAP2	0	0	0	126.562	175.015	169.654	612.642	9.2589	4.04057e-06	3.14726e-05
STC2	0	0	0	348.046	63.6419	44.11	611.98	9.25734	7.41409e-06	5.31544e-05
PALMD	0	0	0	83.4161	212.14	166.261	607.132	9.24587	4.60507e-06	3.52236e-05
PIR	0	0	0	66.1576	143.194	240.908	599.905	9.22859	5.41477e-06	4.04543e-05
UQCR11	0	0	0	77.6632	68.9454	298.591	596.751	9.22099	6.40604e-06	4.67158e-05
TRIM44	0	0	0	161.079	164.408	118.758	587.998	9.19967	4.51739e-06	3.46198e-05
ARHGAP24	0	0	0	224.36	121.98	78.0407	570.626	9.1564	5.91084e-06	4.34983e-05
ABI3BP	0	0	0	184.091	201.533	30.5377	553.776	9.11316	8.55879e-06	6.0058e-05
CTSC	0	0	0	109.304	127.284	159.474	526.026	9.03899	6.83228e-06	4.94903e-05
HTRA3	0	0	0	28.7642	121.98	240.908	522.341	9.02885	1.14308e-05	7.70299e-05
NPIPB5	0	0	0	115.057	169.712	115.365	511.606	8.99889	7.48986e-06	5.36007e-05
ESM1	0	0	0	161.079	143.194	74.6476	504.929	8.97994	8.4383e-06	5.9458e-05
MALL	0	0	0	132.315	79.5524	152.688	502.948	8.97426	8.41799e-06	5.93501e-05
LOXL2	1.40084	0	0	465.979	328.816	261.267	492.002	8.94252	4.03343e-13	2.17075e-11
MXRA7	1.40084	0	0	353.799	291.692	386.81	488.313	8.93166	3.37636e-13	1.84213e-11
IL13RA1	0	0	0	115.057	185.622	64.4684	479.439	8.9052	1.12929e-05	7.61868e-05
PNMA1	0	0	0	126.562	106.07	118.758	477.067	8.89805	9.98016e-06	6.85754e-05
CARD8	0	0	0	178.338	95.4628	78.0407	475.972	8.89473	1.09307e-05	7.42489e-05
TMEM255B	0	0	0	77.6632	58.3384	213.764	470.454	8.87791	1.34898e-05	8.84496e-05
TP53I3	0	0	0	51.7755	53.0349	240.908	463.769	8.85726	1.64968e-05	0.000104313
TMEM140	0	0	0	97.7981	100.766	142.509	458.076	8.83944	1.17193e-05	7.85295e-05
TM4SF18	0	0	0	71.9104	190.926	84.8268	453.815	8.82596	1.34246e-05	8.81682e-05
APOL2	0	0	0	86.2925	68.9454	179.833	451.991	8.82015	1.37858e-05	9.00427e-05
LAPTM5	0	0	0	80.5396	74.2489	176.44	446.051	8.80107	1.40372e-05	9.13828e-05
ACP5	0	0	0	37.3934	37.1244	257.874	445.77	8.80015	2.24699e-05	0.00013587
FAM210B	0	0	0	69.034	106.07	156.081	440.658	8.78352	1.36447e-05	8.92684e-05
CALCOCO2	0	0	0	112.18	116.677	101.792	438.854	8.7776	1.28969e-05	8.55052e-05
FLOT2	0	0	0	112.18	63.6419	142.509	436.747	8.77065	1.40176e-05	9.13565e-05
GBP2	0	0	0	57.5283	53.0349	213.764	435.619	8.76692	1.82486e-05	0.000113817
ZNF185	0	0	0	163.956	68.9454	84.8268	433.092	8.75853	1.53548e-05	9.81879e-05
CXCL8	0	0	0	204.226	111.373	6.78615	431.368	8.75277	2.82586e-05	0.000165652
SERPINE2	0	0	0	100.675	148.498	88.2199	430.957	8.7514	1.42033e-05	9.21768e-05
RAB3B	0	0	0	129.439	137.891	50.8961	421.71	8.72011	1.63068e-05	0.000103221
BGN	0	0	0	103.551	148.498	71.2546	420.181	8.71487	1.51461e-05	9.71668e-05
PILRB	0	0	0	66.1576	137.891	111.971	410.472	8.68114	1.62702e-05	0.000103044
GIMAP6	0	0	0	54.6519	127.284	128.937	408.834	8.67537	1.75733e-05	0.000110026
IL32	0	0	0	25.8877	47.7314	227.336	403.324	8.6558	2.90871e-05	0.000169494
COX6C	0	0	0	66.1576	53.0349	179.833	402.754	8.65375	2.03575e-05	0.00012481
IL4R	0	0	0	77.6632	132.587	101.792	398.223	8.63743	1.71402e-05	0.000107751
RCN3	0	0	0	97.7981	47.7314	145.902	396.752	8.63209	1.92646e-05	0.00011903
GPNMB	0	0	0	83.4161	137.891	88.2199	392.841	8.6178	1.8292e-05	0.000113968
ADIRF	0	0	0	97.7981	31.8209	159.474	391.464	8.61274	2.26005e-05	0.000136521
SERPINB2	0	0	0	227.237	47.7314	13.5723	388.104	8.6003	3.78161e-05	0.000211863
TCEAL4	0	0	0	80.5396	68.9454	135.723	386.73	8.59518	2.04828e-05	0.000125385
ATP5ME	0	0	0	46.0227	26.5175	213.764	384.854	8.58817	3.21582e-05	0.000184778
HPSE	0	0	0	158.203	47.7314	71.2546	377.485	8.56027	2.44589e-05	0.000146409
PLA2G4C	0	0	0	37.3934	100.766	145.902	377.38	8.55988	2.6325e-05	0.000156009
H1-10	0	0	0	74.7868	79.5524	125.544	376.228	8.55546	2.21877e-05	0.000134752
APOL1	0	0	0	20.1349	74.2489	186.619	375.517	8.55274	3.47995e-05	0.000197815
ITGA11	0	0	0	23.0113	201.533	57.6823	371.686	8.53794	3.55701e-05	0.00020127
CCDC69	0	0	0	69.034	63.6419	142.509	371.492	8.53719	2.47082e-05	0.000147827
DNASE1L1	0	0	0	152.45	26.5175	91.613	367.677	8.52229	2.90993e-05	0.000169494
C1orf115	0	0	0	69.034	68.9454	132.33	364.538	8.50993	2.55794e-05	0.000152502
GAS6	0	0	0	43.1462	63.6419	162.868	361.491	8.49781	3.11588e-05	0.000179904
PCDH10	0	0	0	94.9217	127.284	54.2892	361.174	8.49655	2.63568e-05	0.000156098
WWC3	0	0	0	89.1689	116.677	71.2546	357.258	8.48082	2.57105e-05	0.000153053
PERP	0	0	0	92.0453	121.98	61.0753	356.705	8.47859	2.63952e-05	0.000156191
ATP5MJ	0	0	0	37.3934	53.0349	173.047	353.55	8.46577	3.57459e-05	0.000202169
MYZAP	0	0	0	69.034	90.1594	108.578	352.671	8.46218	2.66996e-05	0.000157522
NDUFC2	0	0	0	100.675	47.7314	101.792	349.764	8.45024	2.81944e-05	0.000165357
SAT2	0	0	0	51.7755	68.9454	139.116	348.283	8.44412	3.08107e-05	0.00017824
TRPV2	0	0	0	71.9104	58.3384	125.544	347.469	8.44074	2.93536e-05	0.000170808
MRC2	0	0	0	51.7755	127.284	88.2199	346.213	8.43552	2.8988e-05	0.000169177
CD276	0	0	1.17765	316.406	143.194	268.053	343.58	8.4245	7.78378e-12	3.08601e-10
TNFRSF10B	1.40084	0	1.17765	520.631	413.672	261.267	337.035	8.39675	2.97399e-17	3.81396e-15
PRXL2B	0	0	0	63.2811	42.4279	142.509	335.988	8.39227	3.54774e-05	0.000200841
SLC35E2B	0	0	0	89.1689	116.677	50.8961	335.026	8.38813	3.15485e-05	0.000181801
PTGFRN	0	0	0	60.4047	127.284	71.2546	332.154	8.37571	3.27929e-05	0.000187699
EPB41L3	0	0	0	132.315	100.766	13.5723	329.569	8.36444	4.77489e-05	0.000260636
GALNT6	0	0	0	120.809	37.1244	81.4338	329.043	8.36213	3.64315e-05	0.00020546
APOL3	0	0	0	17.2585	68.9454	159.474	328.212	8.35848	5.01276e-05	0.000272245
DRAM1	0	0	0	94.9217	68.9454	74.6476	327.969	8.35741	3.18655e-05	0.000183362
IGF2R	0	1.75691	1.17765	411.327	466.707	268.053	319.498	8.31966	4.3809e-17	5.41513e-15
PRXL2A	0	1.75691	2.35531	402.698	546.26	641.291	319.37	8.31909	4.34608e-22	1.07692e-19
SP100	0	1.75691	0	204.226	233.354	251.087	316.807	8.30746	9.9763e-12	3.81537e-10
TRIM5	0	0	0	120.809	63.6419	47.503	315.16	8.29994	4.10451e-05	0.000227701
LRRC75A	0	0	1.17765	149.574	90.1594	413.955	309.5	8.27379	9.06436e-11	2.68856e-09
NPAS2	0	0	0	77.6632	84.8559	71.2546	308.972	8.27133	3.73068e-05	0.000209503
FBN2	0	0	0	135.192	79.5524	10.1792	301.443	8.23574	6.6573e-05	0.000346833
NBL1	0	0	0	57.5283	15.9105	149.295	301.036	8.23379	6.07847e-05	0.000320609
ZDHHC14	0	0	0	89.1689	63.6419	64.4684	299.126	8.22461	4.36404e-05	0.000240313
TNFRSF21	0	0	0	57.5283	106.07	71.2546	296.532	8.21205	4.65826e-05	0.000255207
GPX3	1.40084	0	0	106.427	164.408	349.487	287.816	8.169	5.83702e-11	1.82219e-09
NBPF1	0	0	0	103.551	79.5524	30.5377	285.997	8.15986	5.85277e-05	0.000311188
CD55	1.40084	1.75691	0	279.012	445.493	288.411	279.302	8.12568	1.45678e-16	1.53336e-14
RBM23	0	0	0	66.1576	42.4279	91.613	278.18	8.11988	5.7825e-05	0.000308279
KIFC2	0	0	0	46.0227	37.1244	122.151	277.793	8.11787	6.74858e-05	0.00035128
NPIPB3	0	0	0	34.517	42.4279	128.937	277.067	8.11409	7.21894e-05	0.00037083
RGCC	0	0	0	11.5057	42.4279	152.688	276.933	8.11339	9.94734e-05	0.000484523
MAVS	0	1.75691	0	169.709	238.657	203.584	275.202	8.10435	2.60631e-11	8.93356e-10
PLA2R1	0	0	0	86.2925	90.1594	30.5377	274.071	8.0984	6.6501e-05	0.000346609
STK17A	0	0	0	43.1462	111.373	57.6823	272.583	8.09055	6.55687e-05	0.00034235
SLC2A3	0	0	0	126.562	42.4279	30.5377	271.09	8.08263	7.7631e-05	0.000394189
DEPP1	0	1.75691	2.35531	11.5057	360.637	953.454	270.979	8.08204	8.94294e-14	5.53996e-12
PRR29	0	0	0	80.5396	47.7314	64.4684	270.231	8.07805	6.23392e-05	0.000327646
LARP6	0	0	0	97.7981	31.8209	64.4684	269.185	8.07245	6.82794e-05	0.000354326
CDCP1	0	0	0	89.1689	37.1244	64.4684	267.785	8.06493	6.70028e-05	0.000348919
KRT18	0	0	0	17.2585	31.8209	149.295	266.55	8.05826	0.000104808	0.000506535
CARD16	0	0	0	31.6406	37.1244	128.937	266.263	8.05671	8.53368e-05	0.00042629
MT2A	0	0	2.35531	417.08	68.9454	424.134	265.963	8.05508	1.99018e-14	1.45222e-12
CLIP4	0	0	0	103.551	74.2489	20.3584	265.43	8.05219	8.32618e-05	0.000417855
NME4	0	0	0	60.4047	42.4279	88.2199	264.328	8.04618	6.77587e-05	0.000352238
GSTK1	0	0	0	51.7755	47.7314	95.0061	264.108	8.04499	6.93718e-05	0.000359055
LPCAT2	0	0	0	54.6519	100.766	50.8961	261.532	8.03084	7.11613e-05	0.000366468
CLEC2B	0	0	0	25.8877	53.0349	115.365	259.954	8.02212	9.00778e-05	0.000446039
HOXA9	0	0	0	60.4047	100.766	40.7169	259.648	8.02041	7.52735e-05	0.000384415
COA4	0	0	0	54.6519	42.4279	91.613	258.38	8.01335	7.51974e-05	0.000384192
PPP1R3B	0	0	0	54.6519	100.766	47.503	258.193	8.01231	7.55744e-05	0.000385621
BMF	0	0	0	25.8877	95.4628	74.6476	255.88	7.99933	8.85108e-05	0.000439744
PMCH	0	0	0	14.3821	79.5524	98.3991	254.937	7.99399	0.000104169	0.000504268
TNFSF4	0	0	0	48.8991	127.284	16.9654	253.278	7.98458	0.000108208	0.000520429
IGF2BP3	0	0	0	103.551	74.2489	10.1792	251.597	7.97497	0.000112901	0.000539296
LIPG	0	0	0	109.304	47.7314	27.1446	249.973	7.96563	9.60841e-05	0.000470879
LY6E	0	0	0	54.6519	31.8209	95.0061	248.953	7.95973	8.96312e-05	0.000444382
DBNDD1	0	0	0	83.4161	31.8209	61.0753	247.836	7.95324	8.75634e-05	0.000435583
SPATA20	0	0	0	40.2698	26.5175	115.365	246.919	7.9479	0.000105298	0.000508697
IFNAR1	0	0	0	74.7868	74.2489	37.3238	246.754	7.94693	8.66625e-05	0.000431824
gene:ENSG00000256514	0	0	0	17.2585	37.1244	128.937	246.151	7.9434	0.000126099	0.000594695
NDUFB5	0	0	0	51.7755	47.7314	78.0407	241.543	7.91614	8.85978e-05	0.000439993
ARMCX6	0	0	0	63.2811	47.7314	64.4684	241.483	7.91578	8.58525e-05	0.000428506
TRIM38	0	0	0	69.034	31.8209	67.8615	241.362	7.91505	8.98994e-05	0.000445341
GIMAP1	0	0	0	46.0227	47.7314	84.8268	241.34	7.91492	9.15725e-05	0.000452165
BASP1	0	0	0	80.5396	53.0349	40.7169	238.553	7.89816	9.52536e-05	0.000467387
ARHGAP22	0	0	0	40.2698	26.5175	105.185	233.639	7.86814	0.0001178	0.00056067
NBPF15	0	0	0	51.7755	106.07	20.3584	232.752	7.86265	0.000123124	0.000581819
gene:ENSG00000284820	0	0	0	20.1349	26.5175	125.544	231.987	7.8579	0.000146631	0.000680998
HSD17B14	0	0	0	34.517	21.214	115.365	231.804	7.85676	0.000133376	0.000624802
SCRN1	1.40084	0	0	238.743	201.533	54.2892	229.01	7.83927	4.78224e-10	1.22322e-08
SLC1A1	0	0	0	66.1576	74.2489	33.9307	228.404	7.83544	0.000106611	0.000513579
ZNF581	0	0	0	37.3934	10.607	118.758	225.989	7.82011	0.000159235	0.000729
MT-CO3	15.4093	12.2984	14.1319	2738.35	3357.11	3586.48	225.246	7.81535	8.2148e-54	4.88534e-50
CYBA	0	0	0	37.3934	26.5175	101.792	225.063	7.81418	0.000128581	0.000605439
MT-ND4	37.8228	28.1106	21.1978	5919.66	7637.03	5920.91	223.793	7.80602	9.24011e-60	1.09902e-55
MGLL	0	0	0	115.057	31.8209	16.9654	222.622	7.79845	0.000163376	0.000743666
CPNE7	0	0	0	63.2811	53.0349	47.503	222.278	7.79622	0.000109104	0.000524095
ADAMTS18	0	0	0	54.6519	84.8559	30.5377	219.343	7.77704	0.000126574	0.000596462
SPATS2L	0	0	0	60.4047	74.2489	33.9307	218.599	7.77214	0.000121881	0.000576694
RAB15	0	0	0	40.2698	63.6419	64.4684	217.633	7.76575	0.000119822	0.000568247
GABRE	0	0	0	51.7755	58.3384	54.2892	217.551	7.76521	0.000114644	0.000546572
GIMAP4	0	0	0	23.0113	63.6419	78.0407	217.009	7.76161	0.000142886	0.000664902
DOCK10	0	0	0	97.7981	53.0349	10.1792	216.711	7.75963	0.00016845	0.000763546
ATP9A	0	0	0	66.1576	74.2489	20.3584	212.254	7.72965	0.000150615	0.000697608
COA8	0	0	0	25.8877	42.4279	88.2199	209.854	7.71324	0.000160104	0.000732133
MICA	0	0	0	71.9104	37.1244	40.7169	209.454	7.71049	0.0001401	0.000653729
MYEOV	0	0	0	89.1689	21.214	40.7169	208.939	7.70694	0.000159087	0.000728885
SOX12	0	0	0	40.2698	42.4279	71.2546	207.919	7.69988	0.000143175	0.000665986
MT-ATP6	4.20253	19.326	14.1319	2206.21	2609.32	2955.37	207.53	7.69718	2.09191e-46	8.29372e-43
GATC	0	0	0	46.0227	79.5524	37.3238	204.687	7.67727	0.000153092	0.000706038
IFNGR2	0	0	0	34.517	58.3384	64.4684	204.084	7.67302	0.000151947	0.000701849
ATP1B1	0	0	0	66.1576	53.0349	30.5377	201.967	7.65797	0.000160079	0.000732133
ATP5IF1	0	0	0	28.7642	31.8209	88.2199	201.241	7.65278	0.000185988	0.000831945
CYBRD1	0	0	0	54.6519	63.6419	33.9307	198.32	7.63169	0.000166436	0.000755857
GSDME	0	0	0	60.4047	37.1244	44.11	198.17	7.6306	0.000160707	0.000733986
PAPSS2	1.40084	0	0	261.754	95.4628	64.4684	197.022	7.62221	1.71766e-09	3.81695e-08
TRIB3	0	0	2.35531	486.114	84.8559	98.3991	196.902	7.62133	2.21727e-12	9.95176e-11
SUSD5	0	0	0	66.1576	53.0349	27.1446	196.837	7.62086	0.000177165	0.000796975
PRSS3	0	0	0	63.2811	5.30349	74.6476	195.873	7.61378	0.000217757	0.000950461
CHCHD10	0	0	0	34.517	10.607	98.3991	195.31	7.60962	0.000236413	0.00101954
gene:ENSG00000284526	0	0	0	51.7755	21.214	64.4684	194.831	7.60608	0.000180839	0.000811965
FAAP20	0	0	0	31.6406	26.5175	84.8268	194.482	7.60349	0.000199435	0.000883456
SMARCA1	0	0	0	54.6519	79.5524	13.5723	194.214	7.6015	0.000211288	0.000928358
RPAIN	0	0	0	37.3934	47.7314	61.0753	193.509	7.59625	0.000170734	0.000772425
ADAMTSL1	0	0	0	71.9104	42.4279	27.1446	193.286	7.59459	0.000189214	0.000844153
PLAUR	0	0	0	74.7868	15.9105	47.503	192.537	7.58899	0.000205191	0.000904909
BTN2A1	0	0	0	71.9104	37.1244	30.5377	192.523	7.58889	0.000189649	0.000845774
DHRSX	0	0	0	31.6406	31.8209	78.0407	191.988	7.58487	0.000192947	0.000859518
PVR	1.40084	0	1.17765	350.923	190.926	132.33	191.583	7.58183	4.45418e-14	2.95967e-12
HSPB8	0	0	0	71.9104	53.0349	16.9654	190.516	7.57377	0.000214042	0.000937338
CDCA4	0	0	0	17.2585	63.6419	64.4684	190.385	7.57278	0.000212174	0.00093156
ADGRG6	0	0	0	69.034	63.6419	10.1792	190.365	7.57262	0.000232942	0.00100676
PNMA2	0	0	0	60.4047	58.3384	23.7515	189.051	7.56263	0.000193998	0.00086323
SCARA3	0	0	0	34.517	42.4279	64.4684	188.91	7.56156	0.000185631	0.000830662
GTPBP6	0	0	0	40.2698	31.8209	64.4684	188.607	7.55924	0.000186325	0.000832827
DDT	0	0	0	34.517	21.214	81.4338	187.635	7.55178	0.00021636	0.000945752
CSF2RB	0	0	0	60.4047	63.6419	16.9654	186.591	7.54373	0.000218762	0.000953796
BNC1	0	0	0	54.6519	63.6419	23.7515	185.87	7.53815	0.000204641	0.000903153
gene:ENSG00000284969	0	0	0	31.6406	26.5175	78.0407	185.624	7.53624	0.000218204	0.000951712
XRRA1	0	0	0	17.2585	21.214	98.3991	184.96	7.53107	0.000277016	0.00116302
MRFAP1L1	0	0	0	31.6406	42.4279	64.4684	184.584	7.52813	0.000199605	0.000883881
IFNGR1	0	0	0	31.6406	47.7314	61.0753	184.407	7.52675	0.000196963	0.00087446
ZNF469	0	0	0	60.4047	47.7314	27.1446	182.832	7.51437	0.000207794	0.000915711
MEGF6	1.40084	0	0	97.7981	132.587	166.261	182.75	7.51373	8.43882e-10	2.01954e-08
PAWR	0	0	0	34.517	74.2489	37.3238	182.634	7.51281	0.000208028	0.000916401
TMEM141	0	0	0	14.3821	37.1244	84.8268	182.593	7.51249	0.0002668	0.0011297
KIAA1549L	0	0	0	80.5396	31.8209	20.3584	181.709	7.50548	0.000247542	0.00105985
gene:ENSG00000284431	0	0	0	40.2698	63.6419	37.3238	179.132	7.48488	0.000210233	0.000925088
MANSC1	0	0	0	34.517	47.7314	54.2892	179.086	7.48451	0.000209421	0.000922198
ZBED1	0	0	0	51.7755	26.5175	47.503	178.928	7.48324	0.000215629	0.000943247
IFI16	0	1.75691	1.17765	235.866	206.836	183.226	177.361	7.47054	1.41281e-14	1.06354e-12
THSD4	0	0	0	51.7755	68.9454	13.5723	176.424	7.4629	0.000269418	0.00113795
VEPH1	0	0	0	109.304	0	20.3584	176.226	7.46129	0.00042611	0.00166497
TIGAR	0	0	0	57.5283	58.3384	16.9654	175.937	7.45892	0.000256731	0.00109394
C4orf48	0	0	0	17.2585	21.214	91.613	175.917	7.45875	0.00031124	0.00128093
PITPNM1	0	0	0	40.2698	63.6419	33.9307	174.319	7.44559	0.00023235	0.00100493
VWCE	0	0	0	17.2585	42.4279	71.2546	174.216	7.44473	0.000281996	0.00117976
NBPF9	0	0	0	46.0227	37.1244	44.11	174.187	7.44449	0.000222875	0.000969951
CLDN11	0	0	0	57.5283	31.8209	33.9307	174.121	7.44395	0.000235408	0.00101631
ZNF337	0	0	0	28.7642	31.8209	67.8615	173.92	7.44228	0.000251807	0.00107617
TSPAN11	0	0	0	20.1349	63.6419	50.8961	173.396	7.43793	0.000267333	0.00113115
ARRDC2	0	0	0	37.3934	15.9105	71.2546	171.982	7.42611	0.000275358	0.00115851
GOLM2	0	0	0	46.0227	74.2489	10.1792	171.095	7.41866	0.00032904	0.00134093
TNFSF18	0	0	0	40.2698	53.0349	37.3238	169.463	7.40483	0.000243284	0.001045
SNPH	0	0	0	37.3934	42.4279	47.503	169.431	7.40455	0.000245374	0.00105208
FAM241A	0	0	0	40.2698	42.4279	44.11	169.42	7.40446	0.000242898	0.00104372
ALDH1A3	0	0	0	54.6519	58.3384	13.5723	167.438	7.38748	0.000314669	0.00129147
ATP2B4	2.80169	0	0	201.349	302.299	98.3991	167.419	7.38732	1.60757e-13	9.32706e-12
RTL10	0	0	0	25.8877	68.9454	37.3238	166.186	7.37666	0.000297973	0.00123617
VAMP5	1.40084	0	0	71.9104	26.5175	257.874	166.083	7.37576	1.73477e-08	2.81877e-07
BTBD6	1.40084	0	0	74.7868	90.1594	190.012	165.377	7.36962	4.23349e-09	8.3366e-08
CNTNAP3B	0	0	0	37.3934	63.6419	30.5377	164.704	7.36373	0.00028331	0.00118318
A4GALT	0	0	0	28.7642	53.0349	47.503	164.693	7.36364	0.000282568	0.00118103
CARD11	0	0	0	43.1462	47.7314	33.9307	164.62	7.363	0.000275844	0.00115932
PLAAT3	1.40084	0	0	106.427	74.2489	166.261	163.851	7.35624	3.54031e-09	7.14914e-08
NRIP3	0	0	0	86.2925	15.9105	16.9654	163.802	7.35581	0.000383734	0.001528
CD320	0	0	0	34.517	15.9105	67.8615	163.486	7.35303	0.000326849	0.00133455
ITGB5	2.80169	1.75691	1.17765	293.394	254.568	485.21	162.658	7.34569	7.90901e-21	1.71036e-18
FOXRED2	0	0	0	40.2698	47.7314	33.9307	159.82	7.3203	0.000297153	0.00123346
SVIP	0	0	0	37.3934	15.9105	61.0753	159.816	7.32027	0.000337999	0.00137113
CRYL1	0	0	0	48.8991	21.214	40.7169	159.688	7.31912	0.000314577	0.00129147
HTR1D	0	0	0	11.5057	47.7314	61.0753	158.762	7.31072	0.000389936	0.00154855
FAM174C	0	0	0	23.0113	5.30349	88.2199	158.646	7.30967	0.000480422	0.00184893
CTSF	0	0	0	17.2585	37.1244	64.4684	158.348	7.30695	0.000369129	0.00147776
ZNF587	0	0	0	80.5396	31.8209	3.39307	156.697	7.29183	0.000505901	0.00192611
ZNF518B	0	0	0	60.4047	31.8209	20.3584	154.839	7.27463	0.000370993	0.00148422
IER3IP1	0	0	0	34.517	21.214	54.2892	154.714	7.27346	0.000355146	0.00142887
CNTNAP3	0	0	0	34.517	74.2489	10.1792	154.661	7.27297	0.000431878	0.00168473
MMP10	0	1.75691	0	184.091	42.4279	105.185	154.04	7.26716	7.48263e-09	1.37556e-07
GM2A	1.40084	0	0	109.304	74.2489	132.33	152.515	7.25281	3.65873e-09	7.35083e-08
STX10	0	0	0	31.6406	15.9105	61.0753	150.768	7.23618	0.000409017	0.00161301
TACO1	0	0	0	25.8877	42.4279	47.503	150.226	7.23099	0.000368139	0.00147479
ZCCHC3	0	0	0	37.3934	21.214	47.503	150.112	7.22989	0.000372064	0.00148701
ERV3-1	0	0	0	43.1462	63.6419	6.78615	149.42	7.22323	0.000481342	0.00184978
ATOH8	0	0	0	51.7755	21.214	30.5377	148.412	7.21346	0.000395783	0.0015681
RTL6	0	0	0	46.0227	53.0349	13.5723	148.069	7.21012	0.000435553	0.00169573
PHLDA2	0	0	0	51.7755	15.9105	33.9307	146.307	7.19285	0.000424753	0.0016613
CYP1A1	0	0	0	2.87642	74.2489	33.9307	145.483	7.18471	0.000650939	0.00237785
RNASEH1	0	0	0	43.1462	42.4279	23.7515	145.359	7.18348	0.00040246	0.001592
SEMA6C	0	0	0	28.7642	21.214	54.2892	144.382	7.17374	0.000425327	0.001663
SIRPA	0	1.75691	0	112.18	84.8559	105.185	144.174	7.17167	4.03738e-09	8.00344e-08
KCTD12	2.80169	1.75691	8.24358	512.002	1272.84	257.874	143.99	7.16982	9.86337e-26	5.86574e-23
APBA2	0	0	0	25.8877	21.214	57.6823	143.915	7.16908	0.000442269	0.00171739
HEBP2	0	1.75691	0	74.7868	79.5524	152.688	142.805	7.1579	6.28124e-09	1.18211e-07
CADPS2	0	0	0	46.0227	47.7314	13.5723	141.828	7.148	0.000475928	0.0018355
NID2	0	0	0	51.7755	47.7314	6.78615	141.69	7.1466	0.000544281	0.00205188
DPP4	0	0	0	25.8877	58.3384	30.5377	141.077	7.14034	0.000442423	0.00171742
FAM120AOS	0	0	0	25.8877	31.8209	47.503	140.566	7.1351	0.000432346	0.00168546
RITA1	0	0	0	31.6406	26.5175	44.11	140.531	7.13474	0.000422874	0.00165613
TBC1D3L	0	0	0	34.517	26.5175	40.7169	140.522	7.13465	0.000417435	0.00163973
PYGL	0	0	0	34.517	21.214	44.11	140.504	7.13447	0.000436264	0.00169795
EPOR	0	0	0	37.3934	21.214	40.7169	140.495	7.13438	0.000432194	0.00168541
ARHGAP45	0	0	0	40.2698	21.214	37.3238	140.486	7.13428	0.000432724	0.00168638
ALPK3	0	0	0	20.1349	63.6419	27.1446	139.591	7.12506	0.000492986	0.00188542
UCHL1	1.40084	3.51382	4.71062	491.867	323.513	648.077	139.493	7.12405	6.56414e-27	4.87962e-24
SLC25A6	9.80591	0	3.53296	457.35	371.244	1184.18	138.899	7.11789	3.1008e-27	2.45873e-24
ZNF226	0	0	0	23.0113	58.3384	30.5377	138.664	7.11545	0.00047314	0.00182653
EXD3	0	0	0	8.62925	26.5175	67.8615	138.317	7.11183	0.000626418	0.00230455
STYXL1	0	0	0	14.3821	15.9105	71.2546	137.976	7.10828	0.000611527	0.00226096
TNFSF9	0	0	0	51.7755	31.8209	16.9654	137.676	7.10514	0.000502711	0.00191581
ZNF618	0	0	0	31.6406	58.3384	16.9654	135.816	7.08551	0.00052244	0.00197958
TCEAL3	0	0	0	23.0113	37.1244	44.11	135.781	7.08514	0.000490306	0.001878
APOBEC3C	0	0	0	37.3934	15.9105	40.7169	135.669	7.08395	0.000488992	0.00187434
NFATC2	0	0	0	51.7755	42.4279	6.78615	135.169	7.07862	0.000628871	0.00231
CHMP4A	0	0	0	20.1349	21.214	57.6823	134.877	7.0755	0.000554953	0.00208484
ADORA2A	0	0	0	11.5057	31.8209	57.6823	134.636	7.07292	0.000598787	0.00221842
LDLRAD2	5.60338	1.75691	1.17765	0	10.607	1228.29	133.563	7.06137	4.97399e-09	9.58843e-08
MRPL36	0	0	0	17.2585	15.9105	64.4684	133.179	7.05722	0.000624544	0.00229908
SERINC2	0	0	0	23.0113	15.9105	57.6823	133.022	7.05552	0.000575401	0.00214637
SLC17A9	0	0	0	60.4047	10.607	23.7515	132.845	7.0536	0.00061312	0.00226614
ZSCAN31	0	0	0	51.7755	31.8209	13.5723	132.411	7.04888	0.000593018	0.00220142
SLC9B2	0	0	0	31.6406	42.4279	27.1446	130.961	7.033	0.000509085	0.00193638
RASD1	0	0	0	34.517	42.4279	23.7515	130.953	7.0329	0.000516502	0.0019602
ZNF224	0	0	0	37.3934	26.5175	30.5377	130.895	7.03226	0.000511145	0.00194297
EVA1A	0	0	0	17.2585	53.0349	33.9307	130.89	7.03221	0.000575482	0.00214637
NRSN2	0	0	0	34.517	15.9105	40.7169	130.87	7.03199	0.000541618	0.00204249
CCDC106	0	0	0	17.2585	21.214	57.6823	130.508	7.028	0.000620336	0.00228997
TMEM37	0	0	0	34.517	10.607	44.11	129.635	7.01831	0.000596179	0.00221108
IFI6	0	0	0	2.87642	47.7314	47.503	129.463	7.0164	0.00084109	0.00296481
PROSER2	0	0	0	23.0113	15.9105	54.2892	128.687	7.00772	0.000627402	0.0023067
IFNAR2	0	0	0	28.7642	58.3384	13.5723	128.46	7.00518	0.000651977	0.00238091
BMP2	0	0	0	48.8991	31.8209	13.5723	128.359	7.00405	0.000624383	0.00229908
SHC2	0	0	0	14.3821	26.5175	54.2892	127.692	6.99652	0.000661039	0.00240882
GGT5	0	0	0	25.8877	5.30349	61.0753	127.34	6.99255	0.000733026	0.00262846
CXCR4	0	0	0	0	58.3384	37.3238	126.485	6.98283	0.00109982	0.0037047
BEND7	0	0	0	34.517	42.4279	20.3584	126.142	6.9789	0.000586838	0.00218257
BSCL2	0	0	0	8.62925	5.30349	78.0407	125.107	6.96702	0.00102279	0.00349572
QRICH2	0	0	0	11.5057	31.8209	50.8961	124.976	6.96551	0.000727786	0.00261519
TMEM54	0	0	0	17.2585	15.9105	57.6823	124.208	6.95661	0.000747161	0.00266949
EFEMP2	0	1.75691	0	63.2811	42.4279	162.868	124.02	6.95443	3.44089e-08	5.10298e-07
ADAMTS7	2.80169	0	1.17765	155.326	212.14	251.087	123.775	6.95158	2.89985e-16	2.85048e-14
FERMT3	5.60338	0	1.17765	304.9	275.782	363.059	122.907	6.94142	9.36814e-23	2.59127e-20
CASP10	0	0	0	23.0113	53.0349	23.7515	122.408	6.93556	0.000682478	0.00246954
C8orf58	0	0	0	17.2585	37.1244	40.7169	122.394	6.93539	0.000683524	0.00247141
CCDC80	0	0	0	37.3934	42.4279	13.5723	122.152	6.93253	0.000707965	0.0025509
IRF6	0	0	0	20.1349	42.4279	33.9307	121.369	6.92325	0.000674951	0.00244752
NDUFB1	0	0	0	20.1349	37.1244	37.3238	121.353	6.92307	0.000673885	0.00244515
TRANK1	0	0	0	25.8877	37.1244	30.5377	121.338	6.92289	0.00064785	0.00236729
SYBU	0	0	0	25.8877	31.8209	33.9307	121.323	6.9227	0.00064534	0.00236102
SUSD1	0	0	0	31.6406	31.8209	27.1446	121.307	6.92252	0.000643722	0.00235583
PANX2	0	0	0	25.8877	26.5175	37.3238	121.307	6.92252	0.000653346	0.00238507
MICB	0	0	0	37.3934	31.8209	20.3584	121.292	6.92234	0.00067013	0.00243449
TNFRSF10C	0	0	0	17.2585	21.214	50.8961	121.281	6.92221	0.000746649	0.00266846
MYL6B	1.40084	0	0	46.0227	26.5175	186.619	121.114	6.92022	1.13756e-07	1.44863e-06
ISG15	0	1.75691	0	37.3934	26.5175	203.584	120.615	6.91427	1.13926e-07	1.44924e-06
FGF5	0	0	0	34.517	47.7314	10.1792	120.088	6.90795	0.000796632	0.00282484
TVP23C-CDRT4	0	0	0	31.6406	47.7314	13.5723	118.75	6.89178	0.000778907	0.00276712
NPIPA9	0	0	0	31.6406	47.7314	13.5723	118.75	6.89178	0.000779839	0.00276961
CPT1C	0	0	0	5.75283	47.7314	37.3238	118.113	6.88402	0.000965476	0.00333916
GABBR2	0	0	0	46.0227	21.214	16.9654	117.979	6.88239	0.000778081	0.00276584
NAT14	0	0	0	23.0113	10.607	50.8961	117.72	6.87922	0.000831512	0.00293472
PLXNB3	0	0	1.17765	106.427	74.2489	64.4684	116.779	6.86763	2.2417e-08	3.52217e-07
ZNF394	0	0	0	23.0113	31.8209	33.9307	116.519	6.86442	0.000726704	0.00261209
MAP2	0	0	0	34.517	47.7314	6.78615	116.504	6.86423	0.000929995	0.00322865
ZNF436	0	0	0	20.1349	58.3384	13.5723	116.496	6.86414	0.000913668	0.00318405
MAP7D3	0	0	0	28.7642	26.5175	30.5377	116.49	6.86406	0.000711444	0.00256189
C16orf74	0	0	0	28.7642	10.607	40.7169	116.445	6.86351	0.000803019	0.00284513
DTNA	0	0	0	48.8991	15.9105	16.9654	115.208	6.84809	0.000871639	0.00306
BEST1	1.40084	0	0	69.034	26.5175	149.295	115.135	6.84719	7.34622e-08	9.94038e-07
KCTD15	0	0	0	51.7755	15.9105	13.5723	113.555	6.82725	0.0009541	0.00330366
gene:ENSG00000255639	0	0	0	54.6519	0	27.1446	113.243	6.82328	0.00109106	0.00367933
VKORC1	1.40084	0	0	40.2698	53.0349	149.295	113.186	6.82255	7.67631e-08	1.03179e-06
RENBP	0	0	0	11.5057	21.214	50.8961	112.709	6.81646	0.00101015	0.00346545
ADM2	0	0	0	71.9104	10.607	0	112.673	6.816	0.00152567	0.00485311
EOLA2	0	0	0	43.1462	10.607	23.7515	112.019	6.8076	0.000917121	0.00319141
ASMTL	0	0	0	20.1349	37.1244	30.5377	111.729	6.80386	0.000847003	0.00298231
BMERB1	0	0	0	20.1349	26.5175	37.3238	111.701	6.80349	0.000864683	0.00303737
TMBIM4	0	0	0	20.1349	21.214	40.7169	111.686	6.80331	0.000889761	0.0031181
FLYWCH2	0	0	0	11.5057	5.30349	64.4684	111.223	6.79731	0.00126747	0.00415641
COX7A1	0	0	0	14.3821	15.9105	50.8961	110.824	6.79213	0.00104088	0.00354531
ZNF134	0	0	0	51.7755	15.9105	10.1792	108.285	6.75869	0.00113254	0.00380306
PHETA2	0	0	0	25.8877	15.9105	33.9307	106.849	6.73943	0.000975447	0.00336777
CMBL	0	0	0	25.8877	15.9105	33.9307	106.849	6.73943	0.00097645	0.00337025
ZNF589	0	0	0	31.6406	15.9105	27.1446	106.836	6.73925	0.00097233	0.00335923
THEMIS2	0	0	0	28.7642	10.607	33.9307	106.829	6.73916	0.00101299	0.00347058
TRIM4	0	0	0	37.3934	26.5175	13.5723	106.247	6.73128	0.00104143	0.00354603
UQCC3	0	0	0	0	10.607	67.8615	106.126	6.72964	0.00197193	0.00598777
COTL1	0	1.75691	2.35531	161.079	63.6419	288.411	104.92	6.71314	5.4492e-14	3.56114e-12
TMEM80	0	0	0	17.2585	10.607	47.503	104.448	6.70664	0.00120454	0.0039963
S1PR3	0	0	0	28.7642	42.4279	10.1792	104.384	6.70575	0.00112777	0.00379026
NLRX1	0	0	0	11.5057	26.5175	40.7169	104.077	6.7015	0.00113959	0.00382134
PGF	5.60338	3.51382	8.24358	192.72	450.797	1272.4	103.738	6.6968	4.04508e-24	1.65904e-21
ADORA2B	0	0	0	54.6519	5.30349	13.5723	103.056	6.68728	0.00139735	0.00450531
BDH2	0	0	0	14.3821	21.214	40.7169	102.609	6.68101	0.00114227	0.00382818
MIIP	0	0	0	25.8877	5.30349	40.7169	102.442	6.67866	0.00124211	0.00409244
BOK	0	1.75691	0	40.2698	53.0349	128.937	102.424	6.67841	1.08758e-07	1.39243e-06
TBC1D9	0	1.75691	0	106.427	90.1594	27.1446	102.28	6.67637	1.0061e-07	1.30072e-06
SMIM26	0	0	0	8.62925	15.9105	50.8961	102.269	6.67623	0.00137486	0.00444243
ZNF37A	0	0	0	23.0113	37.1244	20.3584	102.098	6.67381	0.00106075	0.00359548
ZNF175	0	0	0	25.8877	31.8209	20.3584	102.079	6.67354	0.00104712	0.00356148
MMP17	0	0	0	20.1349	21.214	33.9307	102.066	6.67335	0.00106464	0.00360661
LRFN3	0	0	0	28.7642	15.9105	27.1446	102.033	6.6729	0.00105648	0.00358408
ZNF621	0	0	0	40.2698	31.8209	3.39307	101.342	6.66309	0.00143005	0.00459349
DZIP1	0	0	0	37.3934	21.214	13.5723	100.816	6.65558	0.00118504	0.00394813
AGO4	0	0	0	46.0227	15.9105	10.1792	100.671	6.6535	0.00136329	0.00440983
CRTAC1	0	0	0	14.3821	10.607	47.503	99.9931	6.64376	0.00135109	0.00438229
SLC25A23	0	0	0	37.3934	0	33.9307	99.6863	6.63932	0.00149487	0.00477572
ST6GALNAC3	0	0	0	40.2698	21.214	10.1792	99.1514	6.63156	0.00131205	0.00427899
TCTA	1.40084	0	0	71.9104	58.3384	78.0407	99.061	6.63025	6.28854e-08	8.63695e-07
NBPF12	0	0	0	28.7642	37.1244	10.1792	98.0851	6.61596	0.00127221	0.00416964
IRS2	0	0	0	31.6406	31.8209	10.1792	97.3874	6.60566	0.00128415	0.00419953
ZNF785	0	0	0	20.1349	37.1244	20.3584	97.2924	6.60425	0.00119387	0.00397125
ZNF862	0	0	0	25.8877	37.1244	13.5723	97.2801	6.60407	0.0012388	0.0040849
GPRIN1	0	0	0	14.3821	26.5175	33.9307	97.2799	6.60407	0.00124683	0.00410457
ALDH1A2	0	0	0	17.2585	26.5175	30.5377	97.2738	6.60398	0.00119448	0.00397125
TNFRSF10A	0	0	0	8.62925	37.1244	30.5377	97.2646	6.60384	0.00134654	0.00436872
PAAF1	0	0	0	23.0113	21.214	27.1446	97.2491	6.60361	0.00115518	0.0038638
FAH	0	0	0	23.0113	15.9105	30.5377	97.2367	6.60343	0.00119463	0.00397125
MARCHF4	0	0	0	37.3934	31.8209	3.39307	97.2221	6.60321	0.00153284	0.00486566
NDUFB4	0	1.75691	1.17765	106.427	53.0349	179.833	96.5185	6.59273	1.08278e-10	3.1183e-09
SPTBN5	1.40084	0	0	60.4047	79.5524	71.2546	95.7879	6.58177	7.59128e-08	1.0237e-06
SLC38A5	0	0	0	43.1462	10.607	13.5723	95.634	6.57945	0.00148591	0.00475414
ZNF761	0	0	0	23.0113	42.4279	10.1792	95.1807	6.5726	0.00137688	0.00444773
LIFR	0	0	0	20.1349	47.7314	6.78615	95.1489	6.57211	0.00161965	0.00509638
DAPK1	1.40084	0	1.17765	100.675	190.926	47.503	94.6851	6.56506	2.04018e-10	5.57054e-09
DDX60L	0	0	0	11.5057	53.0349	10.1792	94.4094	6.56086	0.00180538	0.00555438
ADCY7	0	0	0	28.7642	42.4279	0	94.2932	6.55908	0.00204815	0.00618763
VGLL3	0	0	0	28.7642	42.4279	0	94.2932	6.55908	0.00204948	0.00619008
WASF3	0	0	0	40.2698	21.214	6.78615	93.8067	6.55162	0.00158709	0.00501572
TRMT112	0	0	2.35531	77.6632	58.3384	186.619	93.3244	6.54418	2.67625e-10	7.1211e-09
IDH2	0	1.75691	0	46.0227	15.9105	142.509	93.2025	6.5423	3.71888e-07	4.05058e-06
ZSCAN30	0	0	0	31.6406	31.8209	6.78615	93.0339	6.53968	0.00153118	0.00486168
BEX4	0	0	0	11.5057	15.9105	40.7169	92.6172	6.53321	0.00155811	0.00493797
PPP1R26	0	0	0	17.2585	31.8209	23.7515	92.4742	6.53098	0.00134019	0.00435169
ANKS6	0	0	0	20.1349	31.8209	20.3584	92.4683	6.53089	0.00132832	0.00432258
ARSD	0	0	0	20.1349	26.5175	23.7515	92.4566	6.5307	0.00130795	0.00426739
DNASE1L3	0	0	0	17.2585	21.214	30.5377	92.4507	6.53061	0.00136547	0.00441567
ZNF875	0	0	0	20.1349	21.214	27.1446	92.4448	6.53052	0.00132957	0.00432548
HMGN4	0	0	0	28.7642	26.5175	13.5723	92.439	6.53043	0.0013823	0.00446406
PMAIP1	0	0	0	28.7642	26.5175	13.5723	92.439	6.53043	0.00138324	0.00446587
FBXL13	0	0	0	31.6406	21.214	13.5723	92.4214	6.53016	0.00141097	0.00454184
RPP25	1.40084	0	0	25.8877	79.5524	95.0061	91.9224	6.52235	2.9059e-07	3.2545e-06
FAM156A	0	0	0	5.75283	10.607	50.8961	91.626	6.51768	0.00200153	0.00606372
ATP6V0E2	0	0	0	17.2585	10.607	37.3238	91.6179	6.51756	0.00152615	0.00485311
KCNC4	0	0	0	34.517	15.9105	13.5723	91.2515	6.51178	0.00151016	0.00481552
PPARA	0	0	0	34.517	15.9105	13.5723	91.2515	6.51178	0.00151265	0.00481796
TEN1	0	0	0	23.0113	5.30349	33.9307	91.1721	6.51052	0.00158206	0.00500586
PCBD1	0	0	0	23.0113	5.30349	33.9307	91.1721	6.51052	0.00158251	0.00500595
ZNF75A	0	0	0	34.517	10.607	16.9654	90.8676	6.50569	0.00154337	0.00489384
KLHL29	0	0	0	54.6519	0	10.1792	90.1791	6.49472	0.00234698	0.00692164
ZNF827	0	0	0	25.8877	37.1244	6.78615	90.0462	6.49259	0.00174573	0.00539319
ZNF268	0	0	0	14.3821	42.4279	16.9654	89.9289	6.49071	0.00163575	0.00513477
CLBA1	0	0	0	8.62925	15.9105	40.7169	88.3094	6.4645	0.00193501	0.00589172
BTN2A2	0	0	0	14.3821	37.1244	20.3584	87.6789	6.45416	0.00167617	0.00522988
LRRC37A3	0	0	0	11.5057	31.8209	27.1446	87.6733	6.45407	0.00171412	0.00532595
ZNF83	0	0	0	20.1349	37.1244	13.5723	87.6678	6.45398	0.00168188	0.00524359
ZNF343	0	0	0	14.3821	31.8209	23.7515	87.6677	6.45397	0.00164611	0.00515912
FAM124A	0	0	0	20.1349	26.5175	20.3584	87.6455	6.45361	0.00158192	0.00500586
NPIPA1	0	0	0	14.3821	21.214	30.5377	87.6454	6.45361	0.00166892	0.00521412
SH3RF3	0	0	0	14.3821	21.214	30.5377	87.6454	6.45361	0.00166972	0.00521445
MORC4	0	0	0	20.1349	21.214	23.7515	87.6343	6.45342	0.00157731	0.00499347
DKK1	0	0	0	28.7642	26.5175	10.1792	87.6289	6.45333	0.00173004	0.0053642
RIMKLB	0	0	0	23.0113	21.214	20.3584	87.6288	6.45333	0.00157729	0.00499347
PIK3CD	0	0	0	28.7642	21.214	13.5723	87.6177	6.45315	0.00166674	0.00520867
TYW3	0	0	0	28.7642	21.214	13.5723	87.6177	6.45315	0.00167856	0.00523597
TLCD5	0	0	0	25.8877	15.9105	20.3584	87.6121	6.45306	0.00161302	0.00507951
COMMD5	0	0	0	23.0113	10.607	27.1446	87.6065	6.45297	0.00167205	0.00521977
ZNF75D	0	0	0	23.0113	10.607	27.1446	87.6065	6.45297	0.00167327	0.00522223
gene:ENSG00000288710	0	0	0	28.7642	37.1244	0	87.4569	6.4505	0.00251971	0.00735446
CERCAM	1.40084	0	0	43.1462	37.1244	105.185	87.3898	6.44939	3.42681e-07	3.76348e-06
EID2	0	0	0	31.6406	26.5175	6.78615	87.2435	6.44698	0.00188229	0.00576117
DYRK4	0	0	0	14.3821	10.607	37.3238	86.7619	6.43899	0.00188589	0.00576774
OXLD1	0	0	0	14.3821	10.607	37.3238	86.7619	6.43899	0.00188724	0.00576891
PTCHD4	0	0	0	40.2698	10.607	10.1792	86.5517	6.43549	0.00194666	0.0059209
MZT2B	0	1.75691	1.17765	51.7755	37.1244	217.157	86.0579	6.42724	1.52634e-09	3.45796e-08
POMZP3	0	0	0	14.3821	0	47.503	85.6336	6.4201	0.00245608	0.00719701
TSPAN13	0	0	0	23.0113	37.1244	6.78615	85.4447	6.41692	0.00206613	0.00623244
PGBD1	0	0	0	8.62925	31.8209	27.1446	85.3138	6.41471	0.00201183	0.00609028
CTNNAL1	0	0	0	8.62925	31.8209	27.1446	85.3138	6.41471	0.00201403	0.0060954
IGFBP6	0	0	0	5.75283	5.30349	50.8961	84.9743	6.40896	0.0027127	0.00781419
TP53I11	1.40084	1.75691	1.17765	51.7755	159.105	213.764	84.7287	6.40478	1.23001e-12	5.9958e-11
NCR3LG1	0	0	0	37.3934	21.214	3.39307	84.6202	6.40293	0.00231617	0.00684435
FBXO44	0	0	0	11.5057	5.30349	44.11	84.5335	6.40145	0.00234682	0.00692164
ENOSF1	0	0	0	5.75283	37.1244	23.7515	84.4372	6.39981	0.00224036	0.00664843
PIK3IP1	0	0	0	8.62925	21.214	33.9307	84.356	6.39842	0.00210021	0.00631283
ERVK3-1	0	0	0	28.7642	0	30.5377	84.1646	6.39514	0.00217633	0.00649567
ARG2	0	0	0	28.7642	0	30.5377	84.1646	6.39514	0.00218493	0.0065148
NT5E	2.80169	0	2.35531	215.731	185.622	128.937	83.626	6.38588	6.0029e-17	7.06916e-15
RELN	0	0	0	40.2698	21.214	0	83.5544	6.38464	0.00279723	0.00800534
PLAT	2.80169	1.75691	2.35531	279.012	143.194	213.764	83.4644	6.38309	1.15961e-18	1.83898e-16
IL6R	0	0	0	20.1349	37.1244	10.1792	83.3679	6.38142	0.00206943	0.00624023
HLA-B	5.60338	7.02764	4.71062	198.473	397.762	885.592	83.0617	6.37611	2.81186e-24	1.23867e-21
NFE2L3	0	0	0	34.517	5.30349	16.9654	83.0247	6.37547	0.00216388	0.00646501
ITGAE	0	0	0	2.87642	10.607	47.503	82.89	6.37313	0.0029499	0.00833795
DCAF16	0	0	0	20.1349	31.8209	13.5723	82.8449	6.37234	0.00198459	0.00602162
COA1	0	0	0	23.0113	31.8209	10.1792	82.8397	6.37225	0.00205917	0.00621462
BTN3A2	0	0	0	20.1349	26.5175	16.9654	82.8344	6.37216	0.00190956	0.00582516
ZNF33A	0	0	0	23.0113	26.5175	13.5723	82.8292	6.37207	0.00195398	0.00593781
ANGPTL2	0	0	0	17.2585	21.214	23.7515	82.8291	6.37207	0.00189499	0.00578665
TTC31	0	0	0	23.0113	21.214	16.9654	82.8186	6.37188	0.00189651	0.00578898
ZNF197	0	0	0	23.0113	21.214	16.9654	82.8186	6.37188	0.00189672	0.00578898
STBD1	0	0	0	28.7642	15.9105	13.5723	82.7976	6.37152	0.00201183	0.00609028
GPRASP2	0	0	0	25.8877	5.30349	23.7515	82.7818	6.37124	0.00210709	0.00633193
ARFGEF3	0	0	0	54.6519	5.30349	0	82.7341	6.37041	0.00334341	0.00925664
NFATC4	0	1.75691	0	25.8877	53.0349	101.792	82.6943	6.36972	5.2092e-07	5.44928e-06
C2orf74	0	0	0	5.75283	10.607	44.11	82.4868	6.36609	0.00267059	0.00771157
UNC93B1	0	0	0	14.3821	10.607	33.9307	82.3853	6.36432	0.00215564	0.00644686
TNFRSF1B	0	0	0	11.5057	10.607	37.3238	82.11	6.35949	0.00230282	0.00681338
IL3RA	0	0	0	2.87642	21.214	37.3238	81.7723	6.35354	0.00273183	0.0078629
LAMC2	7.00422	1.75691	2.35531	244.495	403.065	346.094	81.7538	6.35321	3.60375e-24	1.53082e-21
LAMB3	0	0	0	5.75283	21.214	33.9307	80.5754	6.33227	0.00251894	0.00735402
HES4	0	0	0	5.75283	5.30349	47.503	80.4673	6.33033	0.00307395	0.00862708
SNCG	0	0	0	5.75283	5.30349	47.503	80.4673	6.33033	0.00307727	0.00863435
IGFBP7	7.00422	1.75691	3.53296	310.653	233.354	519.14	80.0995	6.32372	7.29516e-24	2.41024e-21
SPRING1	1.40084	0	0	80.5396	63.6419	27.1446	79.826	6.31879	5.03103e-07	5.28614e-06
ZSCAN9	0	0	0	8.62925	31.8209	23.7515	79.7636	6.31766	0.00235153	0.00693161
RNASE4	0	0	0	40.2698	5.30349	10.1792	79.5058	6.31299	0.00267562	0.00772049
FXYD5	2.80169	1.75691	2.35531	163.956	79.5524	366.452	79.2883	6.30904	3.76994e-16	3.67539e-14
KRT8	0	0	0	8.62925	15.9105	33.9307	78.7464	6.29914	0.00251292	0.0073431
BSG	8.40507	1.75691	14.1319	673.081	472.011	946.668	78.736	6.29895	2.36384e-31	4.01651e-28
gene:ENSG00000284337	0	0	0	11.5057	31.8209	20.3584	78.048	6.28629	0.00235233	0.00693227
IL17D	0	0	0	11.5057	26.5175	23.7515	78.0381	6.28611	0.00230704	0.00682245
GOLGA8A	0	0	0	20.1349	31.8209	10.1792	78.0332	6.28602	0.00237695	0.00699614
SLC9A3	0	0	0	14.3821	26.5175	20.3584	78.0332	6.28602	0.00222995	0.00663038
WHAMM	0	0	0	14.3821	26.5175	20.3584	78.0332	6.28602	0.00223477	0.00663514
GAB1	0	0	0	17.2585	26.5175	16.9654	78.0282	6.28592	0.00221898	0.00660475
CCRL2	0	0	0	14.3821	21.214	23.7515	78.0232	6.28583	0.00224298	0.00665393
NBPF19	0	0	0	20.1349	37.1244	3.39307	78.0212	6.28579	0.00276761	0.00794927
FBXO17	0	0	0	23.0113	21.214	13.5723	78.0084	6.28556	0.00224334	0.00665393
DHTKD1	0	0	0	28.7642	10.607	13.5723	77.9787	6.28501	0.00239728	0.0070508
GGT1	0	0	0	23.0113	5.30349	23.7515	77.9786	6.28501	0.00241953	0.00710564
MCUB	0	0	0	17.2585	5.30349	30.5377	77.3886	6.27405	0.00256142	0.00744878
RNASEH2C	1.40084	1.75691	0	54.6519	53.0349	169.654	77.3397	6.27314	1.14643e-09	2.6726e-08
INSYN2B	0	0	0	40.2698	15.9105	0	76.9557	6.26596	0.00355986	0.00975374
C1orf54	0	0	0	2.87642	21.214	33.9307	76.9482	6.26582	0.0030233	0.00850902
SMAGP	0	0	1.17765	34.517	53.0349	78.0407	76.7065	6.26128	5.43981e-07	5.63598e-06
IL1R1	0	0	0	25.8877	31.8209	0	76.5911	6.2591	0.00326979	0.00909303
APBA1	0	0	0	17.2585	37.1244	6.78615	76.5113	6.2576	0.00266223	0.00769305
ZNF133	0	0	0	14.3821	5.30349	33.9307	76.1369	6.25052	0.00277805	0.0079678
FAM78A	0	0	0	14.3821	5.30349	33.9307	76.1369	6.25052	0.00278135	0.00797527
HLA-E	8.40507	17.5691	7.06593	540.766	625.812	1316.51	76.0373	6.24863	1.7278e-30	2.28338e-27
HOXA11	0	0	0	31.6406	15.9105	6.78615	75.8471	6.24502	0.00279046	0.00799175
ZNF74	0	0	0	5.75283	21.214	30.5377	75.5322	6.23902	0.00282944	0.00807421
STPG1	0	0	0	31.6406	10.607	10.1792	75.4785	6.23799	0.00274216	0.00788665
GOLGA8B	0	0	0	31.6406	10.607	10.1792	75.4785	6.23799	0.00274249	0.00788665
SLC25A29	0	1.75691	1.17765	57.5283	58.3384	149.295	75.0015	6.22885	1.03045e-09	2.43179e-08
CYSTM1	2.80169	0	0	60.4047	68.9454	135.723	74.8988	6.22687	6.90122e-10	1.69593e-08
AP5B1	0	1.75691	0	92.0453	31.8209	33.9307	74.6308	6.2217	8.46159e-07	8.16238e-06
COL6A1	0	0	0	5.75283	15.9105	33.9307	74.6083	6.22126	0.002973	0.00838732
GIMAP2	0	0	0	5.75283	37.1244	16.9654	74.5838	6.22079	0.00287622	0.00817438
ABCA6	0	0	0	8.62925	31.8209	20.3584	74.2872	6.21504	0.00269801	0.00777566
CXCR5	0	0	0	0	0	54.2892	74.1078	6.21155	0.0056656	0.0143529
ARHGAP32	0	0	0	20.1349	31.8209	6.78615	74.0586	6.21059	0.00277101	0.0079552
H2AC6	0	0	0	8.62925	15.9105	30.5377	73.8067	6.20568	0.0028114	0.0080335
JTB	0	5.27073	1.17765	120.809	63.6419	301.984	73.7913	6.20538	8.31677e-14	5.17904e-12
STS	0	0	0	8.62925	21.214	27.1446	73.7156	6.2039	0.00276127	0.0079349
CHST15	0	0	0	8.62925	26.5175	23.7515	73.3537	6.1968	0.00275479	0.00792012
POLR3G	0	0	0	11.5057	26.5175	20.3584	73.226	6.19428	0.00262542	0.00760514
NOL3	0	0	0	11.5057	26.5175	20.3584	73.226	6.19428	0.00263345	0.00762283
FSTL3	0	0	0	17.2585	21.214	16.9654	73.2074	6.19392	0.00252092	0.00735619
ZNF71	0	0	0	14.3821	15.9105	23.7515	73.2028	6.19383	0.00256677	0.00746069
ERMAP	0	0	0	14.3821	15.9105	23.7515	73.2028	6.19383	0.00256817	0.00746235
MBP	0	0	0	23.0113	21.214	10.1792	73.1982	6.19374	0.00266401	0.00769633
GPR176	0	0	1.17765	63.2811	68.9454	27.1446	73.1901	6.19358	8.16543e-07	7.96063e-06
BOLA2-SMG1P6	0	0	0	23.0113	15.9105	13.5723	73.1889	6.19355	0.00257375	0.00747367
PLEKHF1	0	0	0	20.1349	5.30349	23.7515	73.1749	6.19328	0.00269684	0.00777416
gene:ENSG00000267303	0	0	0	8.62925	0	44.11	73.0569	6.19095	0.00401757	0.0108037
C18orf32	0	0	0	8.62925	10.607	33.9307	73.0191	6.1902	0.00300938	0.00847186
FAR2	0	0	0	25.8877	21.214	6.78615	72.9972	6.18977	0.00287088	0.00816309
PLTP	0	0	1.17765	34.517	26.5175	91.613	72.9667	6.18917	1.34594e-06	1.20637e-05
NPIPA5	0	0	0	11.5057	0	40.7169	72.7665	6.1852	0.00375932	0.0101992
FAM156B	0	0	0	23.0113	31.8209	0	72.4444	6.1788	0.00360371	0.00985345
GPR4	0	0	0	25.8877	0	23.7515	72.3424	6.17677	0.00327312	0.00909803
HES2	0	0	0	14.3821	5.30349	30.5377	72.1226	6.17238	0.00296667	0.0083734
gene:ENSG00000288725	0	0	0	14.3821	5.30349	30.5377	72.1226	6.17238	0.00298035	0.00840406
PPDPF	2.80169	5.27073	2.35531	181.214	100.766	491.996	71.8558	6.16703	2.63787e-18	3.92186e-16
SPOCD1	1.40084	0	0	46.0227	21.214	81.4338	71.2116	6.15404	1.16149e-06	1.06365e-05
GBGT1	0	0	0	5.75283	26.5175	23.7515	70.9377	6.14848	0.0030902	0.00866655
SLC29A1	8.40507	0	1.17765	224.36	201.533	318.949	70.9289	6.1483	2.78512e-21	6.49534e-19
ABLIM3	4.20253	0	1.17765	169.709	111.373	152.688	70.7847	6.14537	1.26114e-15	1.15385e-13
BID	1.40084	0	0	37.3934	26.5175	84.8268	70.6106	6.14181	1.38406e-06	1.23868e-05
NBPF14	0	0	0	31.6406	0	16.9654	70.1392	6.13215	0.00367163	0.00998865
FHL1	0	1.75691	1.17765	60.4047	111.373	88.2199	69.9233	6.1277	5.22221e-10	1.31875e-08
B4GALT2	0	0	1.17765	46.0227	26.5175	71.2546	69.8448	6.12608	1.1588e-06	1.06267e-05
ZNF211	0	0	0	17.2585	31.8209	6.78615	69.271	6.11418	0.00315936	0.00882721
SRP14	1.40084	1.75691	5.88827	152.45	233.354	332.521	68.6286	6.10074	5.10792e-20	1.01256e-17
SULT1A4	0	0	0	8.62925	0	40.7169	68.6285	6.10074	0.00435045	0.0115205
DCP1B	0	0	0	17.2585	0	30.5377	68.4247	6.09644	0.00367062	0.00998865
CTSS	0	0	0	8.62925	26.5175	20.3584	68.4183	6.09631	0.00311652	0.0087265
CYTL1	0	0	0	8.62925	26.5175	20.3584	68.4183	6.09631	0.0031163	0.0087265
SPATA18	0	0	0	17.2585	26.5175	10.1792	68.4053	6.09604	0.00300824	0.00847064
ZNF721	0	0	0	17.2585	21.214	13.5723	68.3966	6.09585	0.00290576	0.00824375
WDCP	0	0	0	17.2585	15.9105	16.9654	68.3879	6.09567	0.00284927	0.00812106
MYRIP	0	0	0	17.2585	15.9105	16.9654	68.3879	6.09567	0.00285216	0.00812565
NPIPB11	0	0	0	17.2585	15.9105	16.9654	68.3879	6.09567	0.00285302	0.00812565
PAGR1	0	0	0	11.5057	10.607	27.1446	68.3878	6.09567	0.00313174	0.0087624
FKBP1B	0	0	0	11.5057	10.607	27.1446	68.3878	6.09567	0.00313479	0.00876887
FN3K	0	0	0	23.0113	15.9105	10.1792	68.3792	6.09549	0.00303823	0.00854035
ZNF302	0	0	0	23.0113	15.9105	10.1792	68.3792	6.09549	0.00304914	0.00856352
CXCL16	0	0	0	8.62925	10.607	30.5377	68.3669	6.09523	0.00336378	0.00930221
TPM2	2.80169	3.51382	1.17765	103.551	79.5524	356.273	68.2519	6.0928	5.60407e-15	4.48927e-13
TUFT1	0	0	0	34.517	10.607	3.39307	68.0916	6.0894	0.00401617	0.0108024
MIGA1	0	0	0	25.8877	21.214	3.39307	68.0246	6.08799	0.00357729	0.00979023
FGF16	0	0	0	25.8877	5.30349	13.5723	67.9981	6.08742	0.00325195	0.00904978
STEAP3	0	0	1.17765	109.304	5.30349	23.7515	67.8251	6.08375	8.49306e-06	5.97024e-05
SLX1A	1.40084	0	0	28.7642	15.9105	98.3991	67.5237	6.07732	3.59504e-06	2.84465e-05
FAM83G	0	1.75691	0	57.5283	58.3384	30.5377	67.2963	6.07246	1.21421e-06	1.10243e-05
LSM10	1.40084	0	0	25.8877	31.8209	84.8268	66.8889	6.06369	2.18494e-06	1.82626e-05
ABCA9	0	0	0	0	47.7314	3.39307	66.282	6.05054	0.00660893	0.0162949
CYB5D2	0	1.75691	0	23.0113	31.8209	88.2199	65.9691	6.04372	2.38496e-06	1.96854e-05
F8A1	0	0	0	20.1349	0	23.7515	65.7002	6.03783	0.00372438	0.0101113
DNASE2	1.40084	0	2.35531	103.551	42.4279	169.654	65.6667	6.03709	3.28288e-11	1.10301e-09
EME2	0	1.75691	0	46.0227	42.4279	50.8961	65.6147	6.03595	9.51899e-07	9.00707e-06
MRPL41	0	0	2.35531	48.8991	37.1244	139.116	65.586	6.03532	6.74232e-09	1.25302e-07
NTN4	4.20253	3.51382	3.53296	244.495	434.886	111.971	65.4431	6.03217	2.56119e-20	5.25221e-18
NBPF26	0	0	0	23.0113	0	20.3584	65.4414	6.03213	0.00376778	0.0102175
C2orf16	0	0	0	11.5057	37.1244	3.39307	65.4329	6.03194	0.00418275	0.0111646
SLC9A9	0	0	0	5.75283	21.214	23.7515	64.9058	6.02028	0.00364588	0.00994133
TRIM52	0	0	0	5.75283	21.214	23.7515	64.9058	6.02028	0.00364796	0.00994327
ZNF417	0	0	0	8.62925	37.1244	6.78615	64.8947	6.02003	0.0040822	0.0109355
TMEM217	0	0	0	20.1349	26.5175	3.39307	64.8188	6.01834	0.00382102	0.0103501
ZNF500	0	0	0	8.62925	31.8209	13.5723	64.6416	6.01439	0.00361386	0.00987212
TMEM273	0	0	0	5.75283	10.607	30.5377	63.9395	5.99863	0.0040765	0.0109252
CLMN	0	0	0	11.5057	31.8209	10.1792	63.6783	5.99273	0.00370069	0.0100562
APOL6	0	0	0	23.0113	21.214	3.39307	63.6141	5.99127	0.0039764	0.0107148
ZNF510	0	0	0	11.5057	21.214	16.9654	63.5938	5.99081	0.00337005	0.00931306
BLOC1S5	0	0	0	14.3821	21.214	13.5723	63.5897	5.99072	0.00332299	0.00921297
TDRD10	0	0	0	8.62925	15.9105	23.7515	63.5897	5.99072	0.00358459	0.00980794
TMED7-TICAM2	0	0	0	40.2698	5.30349	0	63.5892	5.99071	0.00588721	0.0148321
ZNF174	0	0	0	17.2585	21.214	10.1792	63.5857	5.99063	0.00339854	0.00937653
TMEM35A	0	0	0	20.1349	21.214	6.78615	63.5817	5.99054	0.00361195	0.00986919
SLC9A7	0	0	0	14.3821	15.9105	16.9654	63.5816	5.99054	0.00327153	0.00909574
CEACAM19	0	0	0	14.3821	15.9105	16.9654	63.5816	5.99054	0.00327421	0.00909895
ZNF805	0	0	0	17.2585	15.9105	13.5723	63.5776	5.99045	0.00328787	0.0091305
SLC37A1	0	0	0	20.1349	15.9105	10.1792	63.5736	5.99036	0.00341492	0.00941518
TBX18	0	0	0	23.0113	15.9105	6.78615	63.5695	5.99026	0.00366017	0.00996887
CCNB1IP1	0	0	0	20.1349	10.607	13.5723	63.5655	5.99017	0.00337542	0.00931952
ZNF792	0	0	0	14.3821	5.30349	23.7515	63.5654	5.99017	0.00361566	0.00987479
PTPRD	0	0	0	23.0113	10.607	10.1792	63.5614	5.99008	0.00354916	0.00973333
ZSCAN32	0	0	0	23.0113	10.607	10.1792	63.5614	5.99008	0.00355122	0.00973455
SPATC1L	0	0	0	17.2585	5.30349	20.3584	63.5614	5.99008	0.00351099	0.00964206
NBPF11	0	0	0	25.8877	21.214	0	63.4441	5.98742	0.00469828	0.0122843
RPS15A	7.00422	10.5415	15.3095	396.945	307.602	1425.09	63.0173	5.97768	4.88608e-24	1.88659e-21
gene:ENSG00000270149	0	0	0	34.517	10.607	0	62.5735	5.96748	0.00546374	0.0139454
RTL5	0	0	0	25.8877	10.607	6.78615	62.1612	5.95794	0.00402261	0.0108124
ZNF613	0	0	0	2.87642	21.214	23.7515	61.9532	5.95311	0.00451353	0.0118717
RAB40B	0	0	0	2.87642	21.214	23.7515	61.9532	5.95311	0.004515	0.011873
LPXN	0	1.75691	0	83.4161	37.1244	13.5723	61.9282	5.95252	4.1838e-06	3.24395e-05
CTDSPL	1.40084	0	1.17765	46.0227	58.3384	111.971	61.4058	5.9403	3.905e-09	7.76689e-08
A2M	0	0	0	0	26.5175	20.3584	61.0815	5.93266	0.00564392	0.0143101
ZNF304	0	0	0	11.5057	31.8209	6.78615	60.8724	5.92772	0.00435844	0.0115329
ZNF117	1.40084	0	0	28.7642	95.4628	10.1792	60.7279	5.92429	9.3182e-06	6.46243e-05
CMTM6	1.40084	0	1.17765	66.1576	121.98	30.5377	60.5392	5.9198	8.40987e-09	1.52713e-07
CDKN1A	23.8144	15.8122	15.3095	1101.67	965.235	1269.01	60.3363	5.91495	2.53282e-33	5.02089e-30
ZNF446	0	0	0	2.87642	0	40.7169	60.3043	5.91419	0.00664217	0.0163618
C19orf33	0	0	0	5.75283	0	37.3238	60.0256	5.90751	0.00595479	0.0149802
NDUFAF4	0	0	0	5.75283	26.5175	16.9654	59.9274	5.90514	0.00439673	0.0116178
C1orf159	0	0	0	11.5057	0	30.5377	59.8488	5.90325	0.00508454	0.0131583
KYNU	0	0	0	11.5057	0	30.5377	59.8488	5.90325	0.00509828	0.0131862
FAHD2A	0	0	0	8.62925	0	33.9307	59.8437	5.90313	0.00546263	0.0139454
HRH1	0	0	0	5.75283	15.9105	23.7515	59.4599	5.89385	0.0044821	0.0117969
SYT14	0	0	0	23.0113	21.214	0	59.2824	5.88953	0.00546852	0.0139517
ELAPOR1	0	0	0	5.75283	21.214	20.3584	59.1892	5.88726	0.00448383	0.0117988
EDN1	8.40507	0	1.17765	69.034	408.369	145.902	59.0739	5.88445	7.85076e-15	6.22513e-13
ZNF701	0	0	0	8.62925	26.5175	13.5723	58.7935	5.87758	0.00435417	0.0115265
SYTL4	0	0	0	14.3821	26.5175	6.78615	58.786	5.8774	0.00443439	0.0116894
FJX1	0	0	0	11.5057	21.214	13.5723	58.7822	5.87731	0.00409853	0.0109743
ZNF181	0	0	0	8.62925	37.1244	0	58.7822	5.87731	0.0066241	0.0163289
gene:ENSG00000285982	0	0	0	8.62925	37.1244	0	58.7822	5.87731	0.00662555	0.0163291
KRBOX4	0	0	0	14.3821	21.214	10.1792	58.7785	5.87722	0.00413329	0.01105
SMIM20	0	0	0	8.62925	15.9105	20.3584	58.7785	5.87722	0.00423702	0.011264
PELI3	0	0	0	8.62925	15.9105	20.3584	58.7785	5.87722	0.00423689	0.011264
LRRC37B	0	0	0	17.2585	21.214	6.78615	58.7748	5.87713	0.00433748	0.0115002
BVES	0	0	0	17.2585	21.214	6.78615	58.7748	5.87713	0.00434174	0.0115089
SHROOM1	0	0	0	11.5057	15.9105	16.9654	58.7747	5.87712	0.00400886	0.0107898
RAVER2	0	0	0	17.2585	15.9105	10.1792	58.7673	5.87694	0.00406199	0.0108961
ZNF440	0	0	0	17.2585	15.9105	10.1792	58.7673	5.87694	0.00406651	0.0109058
PARP15	0	0	0	17.2585	15.9105	10.1792	58.7673	5.87694	0.00407241	0.0109167
RASSF4	0	0	0	11.5057	10.607	20.3584	58.7673	5.87694	0.0041692	0.0111335
DPYD	0	0	0	20.1349	15.9105	6.78615	58.7636	5.87685	0.00434631	0.0115159
ZNF81	0	0	0	20.1349	15.9105	6.78615	58.7636	5.87685	0.00435094	0.0115205
GOLGA6L9	0	0	0	17.2585	10.607	13.5723	58.7598	5.87676	0.00402151	0.0108119
KHDRBS3	0	0	0	17.2585	10.607	13.5723	58.7598	5.87676	0.00402989	0.0108294
KIAA0040	0	0	0	17.2585	10.607	13.5723	58.7598	5.87676	0.00403273	0.0108323
NLRP2	0	0	0	11.5057	5.30349	23.7515	58.7598	5.87676	0.00451851	0.0118769
C12orf75	0	0	0	20.1349	10.607	10.1792	58.7561	5.87667	0.00420853	0.0112183
ZNF286A	0	0	0	20.1349	10.607	10.1792	58.7561	5.87667	0.00421088	0.0112216
ARHGEF10L	0	0	0	14.3821	5.30349	20.3584	58.756	5.87667	0.00431269	0.0114421
ZNF605	0	0	0	17.2585	5.30349	16.9654	58.7523	5.87657	0.0042586	0.0113181
PIGZ	0	0	0	20.1349	0	16.9654	58.7411	5.8763	0.00475802	0.0124187
ARSJ	0	0	0	23.0113	5.30349	10.1792	58.4886	5.87008	0.00462848	0.0121258
SLIRP	1.40084	0	0	28.7642	15.9105	78.0407	58.3358	5.86631	5.32417e-06	3.99028e-05
PTTG1IP	11.2068	10.5415	4.71062	526.384	376.548	607.36	58.1467	5.86162	1.65215e-30	2.28338e-27
CENPX	0	0	1.17765	31.6406	21.214	67.8615	58.1308	5.86123	4.14133e-06	3.21731e-05
ARL17B	0	0	0	23.0113	15.9105	3.39307	58.0788	5.85994	0.00494835	0.0128506
ZNF559	0	0	0	5.75283	31.8209	10.1792	58.0473	5.85916	0.00519218	0.0133796
RAB6B	0	0	0	5.75283	5.30349	30.5377	57.9193	5.85597	0.00552887	0.0140784
KCNK6	0	0	1.17765	37.3934	15.9105	64.4684	57.3773	5.84241	4.67369e-06	3.56796e-05
gene:ENSG00000283782	0	0	0	8.62925	31.8209	6.78615	57.3061	5.84062	0.00528081	0.0135542
XRCC6	5.60338	3.51382	4.71062	270.383	228.05	332.521	57.046	5.83405	3.40221e-26	2.2481e-23
RORA	0	0	1.17765	40.2698	74.2489	6.78615	56.4495	5.81889	1.44252e-05	9.3196e-05
CHST3	0	0	0	25.8877	5.30349	6.78615	55.7994	5.80218	0.00560737	0.0142417
PIEZO2	0	0	1.17765	48.8991	58.3384	13.5723	55.733	5.80046	7.33211e-06	5.26346e-05
CLEC11A	0	0	0	8.62925	0	30.5377	55.5097	5.79467	0.00641641	0.0159259
ZNF776	0	0	0	20.1349	21.214	0	55.0412	5.78244	0.00649696	0.0160989
GOLGA6L4	0	0	0	20.1349	21.214	0	55.0412	5.78244	0.00649873	0.0161
MST1	0	0	0	2.87642	10.607	27.1446	54.96	5.78031	0.00628095	0.0156583
GATD1	4.20253	0	2.35531	146.697	116.677	152.688	54.7879	5.77579	5.18416e-16	5.01304e-14
ZNF804A	0	0	0	28.7642	10.607	0	54.7547	5.77491	0.00696077	0.0170073
MMP14	0	8.78455	21.1978	549.395	456.1	709.152	54.6489	5.77212	4.26724e-26	2.67129e-23
CD58	0	0	0	5.75283	21.214	16.9654	53.9775	5.75429	0.00553079	0.0140803
C17orf58	0	0	0	8.62925	21.214	13.5723	53.9741	5.7542	0.00522832	0.0134543
NIPAL2	0	0	0	8.62925	21.214	13.5723	53.9741	5.7542	0.00523195	0.0134607
SLC6A15	0	0	0	11.5057	21.214	10.1792	53.9707	5.7541	0.00516973	0.0133323
C20orf96	0	0	0	11.5057	21.214	10.1792	53.9707	5.7541	0.0051819	0.0133579
FAM50B	0	0	0	5.75283	15.9105	20.3584	53.9707	5.7541	0.00556513	0.0141556
NETO2	0	0	0	14.3821	21.214	6.78615	53.9673	5.75401	0.00535526	0.0137127
SLC46A1	0	0	0	14.3821	21.214	6.78615	53.9673	5.75401	0.00535792	0.0137165
FAS	0	0	0	14.3821	21.214	6.78615	53.9673	5.75401	0.00536046	0.0137201
ZNF140	0	0	0	11.5057	15.9105	13.5723	53.9638	5.75392	0.00496967	0.0129031
MYLIP	0	0	0	8.62925	10.607	20.3584	53.9604	5.75383	0.00531132	0.0136119
ZNF587B	0	0	0	17.2585	15.9105	6.78615	53.957	5.75374	0.00528554	0.0135604
ZNF267	0	0	0	17.2585	15.9105	6.78615	53.957	5.75374	0.00529329	0.0135774
gene:ENSG00000170846	0	0	0	11.5057	10.607	16.9654	53.9569	5.75374	0.00503533	0.0130537
NPIPB13	0	0	0	11.5057	10.607	16.9654	53.9569	5.75374	0.00505374	0.0130928
ZNF562	0	0	0	17.2585	10.607	10.1792	53.9501	5.75355	0.00512268	0.013234
TMEFF1	0	0	0	20.1349	10.607	6.78615	53.9467	5.75346	0.00547715	0.0139674
FAM110A	0	0	0	17.2585	5.30349	13.5723	53.9432	5.75337	0.00523828	0.0134683
GGCT	0	0	0	17.2585	5.30349	13.5723	53.9432	5.75337	0.00525817	0.0135077
ELAPOR2	2.80169	0	0	63.2811	90.1594	47.503	53.9353	5.75316	9.34043e-09	1.68071e-07
ZNF765	0	0	0	20.1349	15.9105	3.39307	53.7392	5.7479	0.00587338	0.0148098
ZNF26	0	0	0	20.1349	15.9105	3.39307	53.7392	5.7479	0.00587959	0.0148192
ZNF764	0	0	0	20.1349	15.9105	3.39307	53.7392	5.7479	0.0058796	0.0148192
SDSL	0	0	0	8.62925	5.30349	23.7515	53.691	5.74661	0.00582916	0.0147108
MT-ND1	54.6329	45.6797	47.1062	2004.86	2529.77	3420.22	53.6094	5.74441	1.36349e-35	4.05433e-32
KIAA1614	0	0	0	20.1349	0	13.5723	53.5617	5.74313	0.00601714	0.0151019
INO80B-WBP1	0	0	0	20.1349	0	13.5723	53.5617	5.74313	0.00602119	0.0151089
MT-ND5	44.827	17.5691	35.3296	2249.36	2264.59	760.049	53.0887	5.73033	1.80815e-27	1.65432e-24
ADM	5.60338	1.75691	3.53296	129.439	153.801	346.094	53.011	5.72822	1.77354e-18	2.70443e-16
gene:ENSG00000250264	0	0	0	37.3934	0	0	52.5125	5.71459	0.00966297	0.0222822
TIMM10B	1.40084	0	0	37.3934	53.0349	27.1446	52.2573	5.70756	5.60466e-06	4.17419e-05
TMEM156	0	0	0	23.0113	5.30349	6.78615	52.2061	5.70615	0.0063374	0.015766
NBPF20	0	0	0	23.0113	5.30349	6.78615	52.2061	5.70615	0.00635514	0.0158002
NIPAL3	0	0	1.17765	37.3934	15.9105	50.8961	52.2025	5.70605	6.7294e-06	4.88343e-05
NES	4.20253	7.02764	3.53296	230.113	212.14	325.735	52.1908	5.70572	9.86903e-25	4.69529e-22
LDOC1	0	0	0	11.5057	0	23.7515	51.8647	5.69668	0.00674272	0.0165596
ARHGEF3	2.80169	0	2.35531	54.6519	169.712	108.578	51.7677	5.69398	2.74734e-12	1.20734e-10
SLC25A43	0	0	0	8.62925	31.8209	0	51.6251	5.69	0.00857998	0.0202105
CYP27A1	0	0	1.17765	20.1349	42.4279	50.8961	51.59	5.68902	7.40283e-06	5.31057e-05
SLC2A4RG	2.80169	0	0	51.7755	31.8209	95.0061	51.3972	5.68362	3.01611e-08	4.58155e-07
gene:ENSG00000272617	0	0	0	2.87642	0	33.9307	51.3368	5.68192	0.00916653	0.0213193
GLYCTK	0	0	0	8.62925	0	27.1446	51.2441	5.67931	0.00743487	0.0179445
DDB2	0	7.02764	1.17765	74.7868	95.4628	244.301	50.9737	5.67168	1.81825e-13	1.04474e-11
POPDC3	0	0	0	17.2585	21.214	0	50.7028	5.66399	0.00766415	0.0184178
TG	0	0	0	2.87642	15.9105	20.3584	50.6708	5.66308	0.00702525	0.0171261
CASP1	0	0	0	2.87642	15.9105	20.3584	50.6708	5.66308	0.00702431	0.0171261
ZNF227	0	0	0	2.87642	15.9105	20.3584	50.6708	5.66308	0.00702499	0.0171261
ZBED5	0	1.75691	0	34.517	53.0349	27.1446	50.5831	5.66058	6.45037e-06	4.70102e-05
ADCY3	1.40084	0	0	34.517	47.7314	30.5377	50.5801	5.6605	5.63974e-06	4.19244e-05
SLC16A7	0	0	0	5.75283	31.8209	3.39307	50.5338	5.65918	0.00816478	0.0193836
ARVCF	0	0	2.35531	34.517	42.4279	98.3991	50.5071	5.65841	5.56403e-08	7.79489e-07
LONRF3	0	0	0	5.75283	26.5175	10.1792	50.2603	5.65135	0.00677001	0.0166129
GSTA4	0	0	0	8.62925	26.5175	6.78615	49.4362	5.6275	0.00693078	0.0169479
ZNF514	0	0	0	8.62925	26.5175	6.78615	49.4362	5.6275	0.00693383	0.0169519
SULT1A3	0	1.75691	0	20.1349	21.214	64.4684	49.4027	5.62652	1.2728e-05	8.45923e-05
OXA1L	4.20253	0	5.88827	149.574	143.194	285.018	49.3253	5.62426	3.66789e-19	6.41557e-17
ARHGEF17	0	3.51382	4.71062	117.933	159.105	179.833	49.1904	5.62031	1.1185e-16	1.2094e-14
LRMDA	0	0	0	5.75283	10.607	20.3584	49.1695	5.61969	0.00707798	0.0172267
C16orf91	0	0	0	5.75283	10.607	20.3584	49.1695	5.61969	0.00709728	0.0172698
FAM200B	0	0	0	5.75283	21.214	13.5723	49.1654	5.61957	0.00681328	0.0166915
DHRS12	0	0	0	5.75283	21.214	13.5723	49.1654	5.61957	0.00681275	0.0166915
ZNF557	0	0	0	8.62925	21.214	10.1792	49.1622	5.61948	0.00654371	0.0161853
SLC7A2	0	0	0	8.62925	21.214	10.1792	49.1622	5.61948	0.00656357	0.0162153
ST3GAL6	0	0	0	8.62925	21.214	10.1792	49.1622	5.61948	0.00656576	0.0162154
HSBP1L1	0	0	0	5.75283	15.9105	16.9654	49.1591	5.61939	0.00671173	0.0164869
PUDP	0	0	0	8.62925	15.9105	13.5723	49.156	5.61929	0.00635258	0.0157971
PLCXD1	0	0	0	11.5057	15.9105	10.1792	49.1529	5.6192	0.0062501	0.0156059
PHF11	0	0	0	14.3821	15.9105	6.78615	49.1497	5.61911	0.00648951	0.0160838
ZNF333	0	0	0	14.3821	15.9105	6.78615	49.1497	5.61911	0.00648933	0.0160838
gene:ENSG00000283515	0	0	0	8.62925	10.607	16.9654	49.1497	5.61911	0.0065303	0.016158
SLC15A3	0	0	0	8.62925	10.607	16.9654	49.1497	5.61911	0.00654647	0.0161853
SRD5A1	0	0	0	8.62925	10.607	16.9654	49.1497	5.61911	0.00657719	0.0162368
H2AC19	0	0	0	8.62925	10.607	16.9654	49.1497	5.61911	0.00658779	0.0162541
LRRC1	0	0	0	17.2585	15.9105	3.39307	49.1466	5.61902	0.00705144	0.0171759
AK4	0	0	0	11.5057	10.607	13.5723	49.1466	5.61902	0.00625897	0.0156197
GPR157	0	0	0	14.3821	10.607	10.1792	49.1435	5.61893	0.00631876	0.0157295
TMEM102	0	0	0	8.62925	5.30349	20.3584	49.1434	5.61893	0.00701625	0.0171182
IRAK3	0	0	0	17.2585	10.607	6.78615	49.1404	5.61884	0.0066619	0.0163995
VEGFC	0	0	0	17.2585	10.607	6.78615	49.1404	5.61884	0.00666553	0.0164038
GSDMC	0	0	0	17.2585	10.607	6.78615	49.1404	5.61884	0.00666817	0.0164069
C1orf174	0	0	0	11.5057	5.30349	16.9654	49.1403	5.61884	0.00666239	0.0163995
ZNF497	0	0	0	11.5057	5.30349	16.9654	49.1403	5.61884	0.00666203	0.0163995
IL15RA	0	0	0	14.3821	5.30349	13.5723	49.1372	5.61874	0.00658827	0.0162541
ZFP41	0	0	0	17.2585	5.30349	10.1792	49.1341	5.61865	0.00676396	0.0166014
C3orf62	0	0	0	17.2585	5.30349	10.1792	49.1341	5.61865	0.00677326	0.016614
B3GNT9	0	0	0	17.2585	5.30349	10.1792	49.1341	5.61865	0.00677687	0.016616
ZNF264	0	0	0	17.2585	5.30349	10.1792	49.1341	5.61865	0.00677595	0.016616
ZNF766	0	0	0	17.2585	0	13.5723	49.1278	5.61847	0.00735338	0.0177839
ANXA2R	0	0	0	2.87642	5.30349	27.1446	48.9272	5.61256	0.00871011	0.0204416
TMEM187	0	0	0	2.87642	5.30349	27.1446	48.9272	5.61256	0.00872261	0.0204669
PDLIM2	1.40084	0	0	25.8877	26.5175	50.8961	48.8784	5.61113	8.27775e-06	5.84653e-05
ZNF155	0	0	0	5.75283	5.30349	23.7515	48.847	5.6102	0.00780602	0.0187036
CERS1	0	0	0	5.75283	5.30349	23.7515	48.847	5.6102	0.00782246	0.0187355
gene:ENSG00000289346	0	0	0	20.1349	15.9105	0	48.8208	5.60942	0.00838537	0.0198203
ZNF222	0	0	0	20.1349	5.30349	6.78615	48.7167	5.60634	0.00738677	0.0178537
MMP16	0	0	0	20.1349	5.30349	6.78615	48.7167	5.60634	0.00739239	0.0178637
gene:ENSG00000285245	0	0	0	34.517	0	0	48.7082	5.60609	0.0114152	0.0256561
gene:ENSG00000183889	0	0	0	11.5057	0	20.3584	48.7027	5.60593	0.00768874	0.0184635
MAP1A	7.00422	3.51382	7.06593	460.227	302.299	145.902	48.4988	5.59988	4.80914e-22	1.16735e-19
KRBOX5	0	0	0	20.1349	10.607	3.39307	48.4293	5.59781	0.00760551	0.0182932
NLRC5	0	0	0	25.8877	0	6.78615	48.1606	5.58978	0.00875102	0.0205214
LRRC37A2	0	0	0	25.8877	0	6.78615	48.1606	5.58978	0.0087493	0.0205214
GNG12	0	7.02764	1.17765	189.843	153.801	47.503	47.8307	5.57987	5.31192e-13	2.75895e-11
EPHB2	0	3.51382	5.88827	120.809	169.712	213.764	47.5987	5.57285	8.42209e-18	1.15141e-15
GIMAP8	0	0	2.35531	23.0113	79.5524	67.8615	47.5644	5.57181	8.96317e-08	1.1806e-06
SHFL	0	1.75691	0	20.1349	42.4279	44.11	47.5265	5.57066	9.88042e-06	6.80473e-05
NARF	5.60338	3.51382	4.71062	149.574	175.015	373.238	47.4669	5.56885	1.00724e-19	1.93227e-17
PDK4	0	0	0	2.87642	31.8209	3.39307	47.2268	5.56153	0.0102898	0.0235117
MOB3A	0	1.75691	3.53296	92.0453	84.8559	118.758	47.0983	5.5576	5.56685e-13	2.86632e-11
GPER1	0	0	0	20.1349	0	10.1792	47.0578	5.55636	0.00846141	0.0199841
IGF2BP1	2.80169	0	0	77.6632	53.0349	33.9307	47.0518	5.55618	4.39047e-08	6.34512e-07
CAPN12	0	0	0	0	0	33.9307	47.0041	5.55472	0.0132517	0.0290054
MARCHF3	1.40084	1.75691	0	63.2811	42.4279	54.2892	46.7852	5.54798	1.8671e-08	3.00911e-07
COLEC12	1.40084	0	1.17765	14.3821	106.07	47.503	46.6482	5.54375	3.80687e-07	4.13129e-06
DHRS7	0	0	1.17765	25.8877	15.9105	54.2892	46.6419	5.54356	1.61453e-05	0.000102417
CRACD	0	1.75691	0	43.1462	58.3384	3.39307	46.6087	5.54253	2.8329e-05	0.000165983
RRAGD	0	0	0	0	26.5175	10.1792	46.4695	5.53821	0.0105933	0.0240682
IFIT5	0	0	0	5.75283	26.5175	6.78615	46.4168	5.53657	0.00859122	0.0202252
TNFRSF25	0	1.75691	0	17.2585	42.4279	44.11	46.331	5.53391	1.35924e-05	8.90242e-05
ZNF468	0	0	0	14.3821	21.214	0	46.2627	5.53178	0.00954241	0.022064
SERPINE1	313.789	65.0057	93.0347	6290.72	9307.63	6114.32	45.8955	5.52028	4.55235e-25	2.25607e-22
NNMT	2.80169	1.75691	3.53296	158.203	79.5524	169.654	45.7739	5.51645	1.08756e-15	1.01854e-13
PHETA1	1.40084	0	0	28.7642	31.8209	37.3238	45.5471	5.50929	9.90644e-06	6.81476e-05
DDR2	0	1.75691	4.71062	198.473	116.677	23.7515	45.3511	5.50307	9.04634e-11	2.68856e-09
AHR	4.20253	0	3.53296	149.574	217.443	40.7169	45.3385	5.50266	5.10577e-13	2.68708e-11
NIBAN1	0	0	1.17765	80.5396	10.607	0	45.2758	5.50067	0.000173562	0.000783136
SLC52A2	1.40084	1.75691	1.17765	80.5396	21.214	118.758	45.2739	5.50061	1.36281e-09	3.11717e-08
CTSB	67.2405	63.2488	64.771	2421.94	2402.48	4034.36	45.2027	5.49834	6.64729e-34	1.58126e-30
ERICH1	0	0	0	2.87642	15.9105	16.9654	45.1591	5.49694	0.00897972	0.0209791
TENM3	0	1.75691	0	71.9104	10.607	13.5723	44.8461	5.48691	3.59633e-05	0.000203302
H2AC18	0	0	0	0	5.30349	27.1446	44.6267	5.47983	0.0123704	0.0274349
BOLA2	0	0	0	17.2585	15.9105	0	44.5174	5.4763	0.0102722	0.0234912
MRPL55	0	0	1.17765	25.8877	10.607	54.2892	44.3917	5.47222	2.37762e-05	0.000142753
ZNF577	0	0	0	5.75283	21.214	10.1792	44.3532	5.47097	0.00878782	0.0205874
ZNF41	0	0	0	11.5057	21.214	3.39307	44.3475	5.47078	0.00913174	0.0212508
LIMCH1	0	0	0	8.62925	15.9105	10.1792	44.3447	5.47069	0.008138	0.0193509
RASSF2	0	0	0	8.62925	15.9105	10.1792	44.3447	5.47069	0.00814708	0.0193556
NBPF3	0	0	0	11.5057	15.9105	6.78615	44.3419	5.4706	0.0082689	0.0196112
CDKL1	0	0	0	11.5057	15.9105	6.78615	44.3419	5.4706	0.00827292	0.0196129
SP110	0	0	0	5.75283	10.607	16.9654	44.3419	5.4706	0.00854244	0.0201458
WDR27	0	0	0	5.75283	10.607	16.9654	44.3419	5.4706	0.00854171	0.0201458
MEDAG	0	0	0	8.62925	10.607	13.5723	44.339	5.47051	0.0080164	0.0191076
HOPX	0	0	0	11.5057	10.607	10.1792	44.3362	5.47041	0.00795478	0.018995
VIP	0	0	0	11.5057	10.607	10.1792	44.3362	5.47041	0.00796586	0.01901
CD274	0	0	0	11.5057	10.607	10.1792	44.3362	5.47041	0.00797507	0.0190282
RUNX1T1	0	0	0	11.5057	10.607	10.1792	44.3362	5.47041	0.00797787	0.0190311
CLDN14	0	0	0	11.5057	10.607	10.1792	44.3362	5.47041	0.00799351	0.0190645
ZNF79	0	0	0	11.5057	10.607	10.1792	44.3362	5.47041	0.00799683	0.0190686
PSTPIP2	0	0	0	11.5057	10.607	10.1792	44.3362	5.47041	0.00800494	0.0190841
GPR173	0	0	0	14.3821	10.607	6.78615	44.3334	5.47032	0.00830333	0.0196635
MYORG	0	0	0	14.3821	10.607	6.78615	44.3334	5.47032	0.00831804	0.0196885
ZSCAN18	0	0	0	8.62925	5.30349	16.9654	44.3334	5.47032	0.0085414	0.0201458
C17orf67	0	0	0	8.62925	5.30349	16.9654	44.3334	5.47032	0.00854644	0.0201489
FRMD3	0	0	0	17.2585	10.607	3.39307	44.3306	5.47023	0.00903751	0.0210623
C1RL	0	0	0	17.2585	10.607	3.39307	44.3306	5.47023	0.00903832	0.0210623
CHRNA7	0	0	0	17.2585	10.607	3.39307	44.3306	5.47023	0.00907318	0.0211311
ADA2	0	0	0	17.2585	10.607	3.39307	44.3306	5.47023	0.00909179	0.0211661
ZNF517	0	0	0	11.5057	5.30349	13.5723	44.3306	5.47023	0.00820432	0.0194658
CERS6	0	0	0	14.3821	5.30349	10.1792	44.3278	5.47014	0.00829058	0.0196431
NPIPB4	0	0	0	14.3821	5.30349	10.1792	44.3278	5.47014	0.00830242	0.0196635
ZNF234	0	0	0	14.3821	5.30349	10.1792	44.3278	5.47014	0.0083268	0.0197031
ZNF419	0	0	0	17.2585	5.30349	6.78615	44.325	5.47005	0.00880352	0.0206081
ZNF778	0	0	0	17.2585	5.30349	6.78615	44.325	5.47005	0.00880766	0.0206136
SHC3	0	0	0	17.2585	5.30349	6.78615	44.325	5.47005	0.00881114	0.0206177
GPR143	0	0	0	11.5057	0	16.9654	44.3249	5.47005	0.00916934	0.0213216
gene:ENSG00000285816	0	0	0	14.3821	0	13.5723	44.3221	5.46995	0.00901455	0.0210249
ANG	0	0	0	14.3821	0	13.5723	44.3221	5.46995	0.00901443	0.0210249
TCFL5	0	0	0	14.3821	0	13.5723	44.3221	5.46995	0.00901201	0.0210249
AGAP9	0	0	0	17.2585	0	10.1792	44.3193	5.46986	0.00930575	0.0215924
PKIA	0	1.75691	0	51.7755	21.214	16.9654	43.2506	5.43465	2.23715e-05	0.000135551
PRICKLE4	0	0	0	8.62925	0	20.3584	43.1898	5.43262	0.0103047	0.0235383
H1-2	0	0	0	8.62925	0	20.3584	43.1898	5.43262	0.0103096	0.023545
CACNA2D1	1.40084	0	0	23.0113	63.6419	10.1792	43.0658	5.42847	4.20034e-05	0.000232475
C11orf80	1.40084	0	0	20.1349	5.30349	64.4684	42.917	5.42348	4.69838e-05	0.000257085
GRB14	0	0	0	25.8877	0	3.39307	42.8864	5.42245	0.0123605	0.0274282
COL12A1	0	0	1.17765	8.62925	74.2489	10.1792	42.7926	5.41929	0.000118938	0.000565184
PDGFC	0	0	0	20.1349	10.607	0	42.7921	5.41927	0.0115054	0.0258394
B3GNT5	0	0	0	20.1349	10.607	0	42.7921	5.41927	0.0115269	0.0258827
ABCC3	0	0	0	0	15.9105	16.9654	42.7195	5.41682	0.0117356	0.0262919
gene:ENSG00000280433	0	0	0	0	15.9105	16.9654	42.7195	5.41682	0.0117676	0.0263387
CMTM8	0	0	0	20.1349	5.30349	3.39307	42.5519	5.41115	0.0106945	0.024274
B3GALT4	0	0	0	0	0	30.5377	42.4898	5.40905	0.0159763	0.0337637
PMF1-BGLAP	0	0	0	5.75283	0	23.7515	42.4685	5.40832	0.0116659	0.0261472
H2BC5	0	0	0	2.87642	0	27.1446	42.4021	5.40606	0.0132439	0.0290023
ZNF438	2.80169	1.75691	0	57.5283	63.6419	88.2199	42.2791	5.40187	3.65793e-10	9.56208e-09
ZNF84	0	0	1.17765	28.7642	37.1244	27.1446	42.2084	5.39946	1.50813e-05	9.68556e-05
C2orf68	0	1.75691	0	34.517	26.5175	27.1446	42.1868	5.39872	1.5349e-05	9.81879e-05
FAM234A	2.80169	3.51382	2.35531	80.5396	95.4628	210.371	42.0899	5.3954	3.14561e-14	2.18795e-12
UQCRQ	1.40084	1.75691	3.53296	86.2925	37.1244	193.405	41.8882	5.38847	2.49166e-11	8.56527e-10
gene:ENSG00000288640	0	0	0	0	26.5175	6.78615	41.7963	5.3853	0.0142433	0.0307179
C19orf53	0	1.75691	2.35531	48.8991	42.4279	111.971	41.7644	5.3842	1.7201e-09	3.81695e-08
RASGRF2	0	0	0	11.5057	21.214	0	41.7643	5.3842	0.0118294	0.0264472
FRAS1	0	0	0	11.5057	21.214	0	41.7643	5.3842	0.0118417	0.0264697
THAP5	0	0	0	11.5057	21.214	0	41.7643	5.3842	0.0118519	0.0264825
TOX2	1.40084	0	1.17765	40.2698	47.7314	61.0753	41.7559	5.38391	7.39311e-08	9.99246e-07
B2M	16.8101	33.3813	38.8626	779.509	1172.07	1771.18	41.3494	5.3698	3.01376e-27	2.45873e-24
gene:ENSG00000287542	0	0	0	28.7642	0	0	41.1123	5.3615	0.0159027	0.03362
SRGN	9.80591	10.5415	16.4872	667.328	424.279	468.244	40.8998	5.35402	2.35522e-30	2.8013e-27
RAC2	4.20253	5.27073	3.53296	238.743	58.3384	247.694	40.7566	5.34896	7.77034e-17	8.80194e-15
ANGPT2	1.40084	0	3.53296	138.068	74.2489	37.3238	40.6127	5.34386	2.51283e-10	6.71632e-09
NPIPB12	0	0	0	23.0113	5.30349	0	40.5238	5.3407	0.0138706	0.0300395
TMEM154	0	0	0	23.0113	5.30349	0	40.5238	5.3407	0.0138931	0.0300796
RGS4	0	0	0	23.0113	5.30349	0	40.5238	5.3407	0.0138977	0.0300817
ZNF544	1.40084	0	0	23.0113	21.214	40.7169	40.5217	5.34062	2.50318e-05	0.000149612
MAP1LC3B	5.60338	7.02764	11.7765	483.238	323.513	230.729	40.4201	5.337	7.16155e-24	2.41024e-21
IL10RB	2.80169	0	0	17.2585	68.9454	61.0753	40.4182	5.33693	3.57128e-07	3.91131e-06
CST3	12.6076	7.02764	3.53296	201.349	127.284	620.933	40.1889	5.32873	3.6357e-18	5.27354e-16
FABP5	2.80169	1.75691	5.88827	48.8991	143.194	274.839	40.1276	5.32652	1.28931e-13	7.74496e-12
SFRP1	0	0	0	14.3821	15.9105	0	40.0307	5.32303	0.0126283	0.0278873
ATPSCKMT	0	0	0	2.87642	10.607	16.9654	39.8637	5.317	0.0117597	0.026326
TSNARE1	0	0	0	2.87642	10.607	16.9654	39.8637	5.317	0.0117947	0.0263893
DDIT4L	0	0	0	2.87642	26.5175	3.39307	39.853	5.31662	0.0142333	0.030702
EVC	2.80169	1.75691	0	80.5396	106.07	16.9654	39.7912	5.31438	1.43873e-08	2.41017e-07
MYL5	0	0	0	2.87642	5.30349	20.3584	39.6201	5.30816	0.013336	0.029174
FAM167B	0	0	0	2.87642	5.30349	20.3584	39.6201	5.30816	0.0133856	0.0292661
SLC66A1	1.40084	0	1.17765	23.0113	42.4279	74.6476	39.5709	5.30637	2.93031e-07	3.26953e-06
FBXO27	0	0	0	5.75283	15.9105	10.1792	39.5359	5.30509	0.0107657	0.0244132
ZNF814	0	0	0	5.75283	15.9105	10.1792	39.5359	5.30509	0.0108101	0.0244999
DMRTA1	0	0	0	8.62925	15.9105	6.78615	39.5334	5.305	0.0106741	0.0242378
POLR2J3_1	0	0	0	11.5057	15.9105	3.39307	39.5309	5.30491	0.011239	0.0253224
CEP126	0	0	0	8.62925	10.607	10.1792	39.5283	5.30482	0.0103481	0.0236192
SPIN3	0	0	0	11.5057	10.607	6.78615	39.5258	5.30472	0.0104915	0.0238961
XYLT1	0	0	0	11.5057	10.607	6.78615	39.5258	5.30472	0.0105248	0.0239403
gene:ENSG00000285589	0	0	0	11.5057	10.607	6.78615	39.5258	5.30472	0.0105235	0.0239403
B3GNT8	0	0	0	5.75283	5.30349	16.9654	39.5258	5.30472	0.0119419	0.0266485
EPHA5	0	0	0	14.3821	10.607	3.39307	39.5233	5.30463	0.011278	0.0253958
ZNF600	0	0	0	8.62925	5.30349	13.5723	39.5233	5.30463	0.0110681	0.0250037
SEMA4D	0	0	0	8.62925	5.30349	13.5723	39.5233	5.30463	0.0110713	0.025006
ZSCAN16	0	0	0	8.62925	5.30349	13.5723	39.5233	5.30463	0.011081	0.0250233
MTFP1	0	0	0	11.5057	5.30349	10.1792	39.5208	5.30454	0.0106823	0.0242518
ZNF473	0	0	0	11.5057	5.30349	10.1792	39.5208	5.30454	0.0107336	0.024345
GJD3	0	0	0	11.5057	5.30349	10.1792	39.5208	5.30454	0.0107787	0.0244381
SARM1	0	0	0	11.5057	5.30349	10.1792	39.5208	5.30454	0.0108185	0.0245118
AJM1	0	0	0	11.5057	5.30349	10.1792	39.5208	5.30454	0.0108374	0.0245477
ADAM23	0	0	0	14.3821	5.30349	6.78615	39.5183	5.30445	0.011104	0.0250562
ZSCAN5A	0	0	0	8.62925	0	16.9654	39.5183	5.30445	0.0128892	0.0283739
GYPC	0	0	0	8.62925	0	16.9654	39.5183	5.30445	0.0129007	0.0283886
MT1E	0	0	0	11.5057	0	13.5723	39.5158	5.30436	0.0123649	0.027433
SCUBE1	0	0	0	14.3821	0	10.1792	39.5133	5.30426	0.0123886	0.0274703
ZNF529	0	0	0	14.3821	0	10.1792	39.5133	5.30426	0.0124044	0.0275001
GCKR	0	0	0	14.3821	0	10.1792	39.5133	5.30426	0.0124408	0.0275654
TIMP1	5.60338	12.2984	16.4872	218.608	159.105	1007.74	39.3586	5.29861	2.98216e-17	3.81396e-15
gene:ENSG00000276612	0	0	0	23.0113	0	3.39307	39.1944	5.29258	0.0145203	0.0311515
INHBA	0	0	1.17765	28.7642	53.0349	0	38.9038	5.28184	0.000197259	0.000875446
MME	0	1.75691	0	28.7642	42.4279	16.9654	38.8607	5.28024	3.41529e-05	0.000194827
ME3	1.40084	0	0	20.1349	21.214	40.7169	38.851	5.27988	3.4446e-05	0.000196123
ZNF195	0	1.75691	0	20.1349	21.214	40.7169	38.8483	5.27978	3.48096e-05	0.000197815
ANKRD1	16.8101	7.02764	4.71062	238.743	636.419	264.66	38.8185	5.27867	4.60606e-21	1.02063e-18
TINF2	1.40084	0	1.17765	48.8991	31.8209	50.8961	38.6949	5.27407	1.12093e-07	1.42898e-06
SLC2A12	0	0	0	17.2585	10.607	0	38.6713	5.27319	0.0138289	0.0299843
F2RL2	0	0	0	17.2585	10.607	0	38.6713	5.27319	0.0138401	0.0299843
ISY1-RAB43	5.60338	0	0	71.9104	68.9454	101.792	38.6076	5.27081	1.86101e-11	6.58776e-10
DIPK1B	8.40507	0	4.71062	80.5396	95.4628	369.845	38.3125	5.25974	2.80066e-14	1.97107e-12
FBLIM1	2.80169	5.27073	10.5989	250.248	180.319	335.914	38.3071	5.25954	4.91712e-24	1.88659e-21
gene:ENSG00000263020	0	0	0	5.75283	0	20.3584	38.2199	5.25625	0.0149926	0.0319345
XRCC3	0	0	0	17.2585	0	6.78615	38.0005	5.24795	0.0141858	0.0306239
gene:ENSG00000280571	0	0	0	17.2585	0	6.78615	38.0005	5.24795	0.0142183	0.0306752
CEMP1	0	0	0	0	0	27.1446	37.9763	5.24703	0.02078	0.0417918
CRIP1	0	0	0	0	0	27.1446	37.9763	5.24703	0.020789	0.0418029
WDR54	0	0	0	2.87642	0	23.7515	37.9542	5.24619	0.017125	0.0358285
CD40	0	0	0	2.87642	0	23.7515	37.9542	5.24619	0.0171563	0.035875
CARD6	1.40084	1.75691	2.35531	100.675	79.5524	57.6823	37.9073	5.2444	1.31063e-11	4.82621e-10
MZT2A	1.40084	1.75691	0	31.6406	26.5175	74.6476	37.8571	5.24249	3.39583e-07	3.73981e-06
NDUFA9	0	1.75691	0	8.62925	15.9105	57.6823	37.755	5.2386	8.60839e-05	0.000429301
PLEKHB2	5.60338	5.27073	4.71062	244.495	265.175	105.185	37.6303	5.23382	3.54348e-19	6.29046e-17
TNIP2	4.20253	0	1.17765	46.0227	95.4628	101.792	37.6138	5.23319	6.34183e-11	1.96801e-09
AXIN2	0	0	0	0	26.5175	3.39307	37.4217	5.2258	0.0180411	0.0374487
ANKRD36	0	0	0	8.62925	21.214	0	37.3427	5.22275	0.0156218	0.0331086
MT-ND6	32.2194	14.0553	16.4872	483.238	487.921	1404.73	37.3265	5.22213	3.48449e-23	1.01084e-20
ZDBF2	0	0	0	25.8877	0	0	37.3225	5.22197	0.0189616	0.0389179
RNF144B	2.80169	0	1.17765	80.5396	53.0349	44.11	36.9217	5.2064	3.69908e-09	7.39444e-08
KRT19	0	1.75691	0	0	15.9105	67.8615	36.9194	5.20631	0.00024608	0.00105435
PATJ	0	0	0	2.87642	26.5175	0	36.7524	5.19977	0.0184222	0.0381093
NBPF10	0	0	0	2.87642	26.5175	0	36.7524	5.19977	0.0184244	0.0381093
CHRFAM7A	0	0	0	2.87642	26.5175	0	36.7524	5.19977	0.0184266	0.0381093
GLIS3	0	0	0	2.87642	26.5175	0	36.7524	5.19977	0.018439	0.0381283
PHPT1	2.80169	3.51382	2.35531	40.2698	21.214	278.232	36.7236	5.19864	2.53352e-09	5.3196e-08
CDC42EP4	0	1.75691	1.17765	57.5283	26.5175	37.3238	36.656	5.19598	2.61281e-07	2.97101e-06
CBWD6	0	0	0	20.1349	5.30349	0	36.6431	5.19547	0.016762	0.0351618
KIF21A	0	0	0	20.1349	5.30349	0	36.6431	5.19547	0.0167729	0.0351784
ANKEF1	0	0	0	2.87642	21.214	6.78615	36.1532	5.17605	0.0152822	0.0324758
ATAD3B	0	1.75691	0	28.7642	5.30349	37.3238	35.812	5.16237	7.97992e-05	0.0004032
ICAM2	30.8186	22.8398	21.1978	601.171	434.886	1652.43	35.6375	5.15532	1.54294e-22	4.17084e-20
HEY2	0	0	0	20.1349	0	3.39307	35.5405	5.15139	0.0180278	0.0374383
ZNF160	0	1.75691	0	17.2585	42.4279	23.7515	35.5222	5.15065	6.11733e-05	0.000322191
C19orf12	0	0	1.17765	20.1349	15.9105	37.3238	35.502	5.14983	6.21066e-05	0.000326568
PINX1_2	1.40084	0	0	23.0113	10.607	37.3238	35.493	5.14946	6.83261e-05	0.000354338
ZNF200	0	0	0	5.75283	21.214	3.39307	35.4705	5.14855	0.0156683	0.0331953
MT-ND2	88.2532	57.978	45.9285	2122.79	2858.58	1842.44	35.4202	5.1465	1.6157e-28	1.60143e-25
SLC45A3	0	0	0	11.5057	15.9105	0	35.2906	5.14121	0.016608	0.0348879
TRMT61B	0	0	0	11.5057	15.9105	0	35.2906	5.14121	0.0166989	0.0350541
XIRP2	0	0	0	11.5057	15.9105	0	35.2906	5.14121	0.0167106	0.0350725
TBC1D4	4.20253	1.75691	10.5989	189.843	339.423	122.151	35.1718	5.13635	4.97764e-18	7.04811e-16
LTBR	5.60338	3.51382	8.24358	184.091	132.587	332.521	34.9254	5.12621	2.07768e-19	3.80184e-17
MMRN2	14.0084	12.2984	2.35531	207.102	387.155	396.99	34.9106	5.12559	3.32595e-22	8.41677e-20
ARHGAP4	0	0	0	2.87642	5.30349	16.9654	34.8319	5.12234	0.0159646	0.033745
BCL2L12	0	0	0	2.87642	5.30349	16.9654	34.8319	5.12234	0.0159896	0.0337857
KIF19	0	0	0	2.87642	5.30349	16.9654	34.8319	5.12234	0.0159946	0.0337904
HIRIP3	0	0	0	2.87642	5.30349	16.9654	34.8319	5.12234	0.0160057	0.0338018
FAM200A	0	0	0	2.87642	5.30349	16.9654	34.8319	5.12234	0.0160167	0.0338191
ZNF205	0	1.75691	1.17765	17.2585	47.7314	61.0753	34.7906	5.12062	1.01048e-06	9.49291e-06
PCNX2	0	0	0	5.75283	15.9105	6.78615	34.7243	5.11787	0.0145735	0.031215
PRRT3	0	0	0	5.75283	15.9105	6.78615	34.7243	5.11787	0.0145947	0.0312548
ZNF229	0	0	0	5.75283	15.9105	6.78615	34.7243	5.11787	0.0146168	0.0312797
EDIL3	0	0	0	8.62925	15.9105	3.39307	34.7221	5.11778	0.0150243	0.0319906
ZNF431	0	0	0	8.62925	15.9105	3.39307	34.7221	5.11778	0.0150277	0.031992
PLPP4	0	0	0	2.87642	10.607	13.5723	34.722	5.11778	0.0149671	0.0319029
KCNMA1	0	0	0	5.75283	10.607	10.1792	34.7198	5.11769	0.0137523	0.0298649
ZNF747	0	0	0	5.75283	10.607	10.1792	34.7198	5.11769	0.0137699	0.0298976
ZNF284	0	0	0	5.75283	10.607	10.1792	34.7198	5.11769	0.0138002	0.0299525
PDCD1LG2	0	0	0	8.62925	10.607	6.78615	34.7176	5.1176	0.0136238	0.0296833
APLP1	0	0	0	8.62925	10.607	6.78615	34.7176	5.1176	0.0136276	0.0296862
TRPV4	0	0	0	11.5057	10.607	3.39307	34.7154	5.11751	0.014483	0.0310997
GABRR2	0	0	0	11.5057	10.607	3.39307	34.7154	5.11751	0.0144971	0.031113
SLC6A4	0	0	0	11.5057	10.607	3.39307	34.7154	5.11751	0.0144957	0.031113
ZNF773	0	0	0	11.5057	10.607	3.39307	34.7154	5.11751	0.0145386	0.0311685
APOE	0	0	0	5.75283	5.30349	13.5723	34.7154	5.1175	0.0143124	0.0308446
ZNF696	0	0	0	5.75283	5.30349	13.5723	34.7154	5.1175	0.0143192	0.0308482
ZNF570	0	0	0	8.62925	5.30349	10.1792	34.7132	5.11741	0.0135376	0.0295334
ZNF527	0	0	0	8.62925	5.30349	10.1792	34.7132	5.11741	0.0135489	0.0295527
MORN4	0	0	0	8.62925	5.30349	10.1792	34.7132	5.11741	0.0135604	0.0295724
AGAP4	0	0	0	8.62925	5.30349	10.1792	34.7132	5.11741	0.0135931	0.0296328
PGBD2	0	0	0	11.5057	5.30349	6.78615	34.711	5.11732	0.01383	0.0299843
ZNF584	0	0	0	11.5057	5.30349	6.78615	34.711	5.11732	0.0138238	0.0299843
PAQR7	0	0	0	8.62925	0	13.5723	34.7088	5.11723	0.0152985	0.0325008
DIRAS3	0	0	0	11.5057	0	10.1792	34.7066	5.11714	0.0149995	0.0319434
GLDC	0	0	0	14.3821	0	6.78615	34.7044	5.11705	0.0157523	0.0333554
GAREM2	0	0	0	14.3821	0	6.78615	34.7044	5.11705	0.0157705	0.0333811
TSSC4	1.40084	1.75691	1.17765	37.3934	26.5175	105.185	34.5738	5.11161	3.95107e-08	5.79458e-07
gene:ENSG00000124593	0	0	0	0	21.214	6.78615	34.5032	5.10866	0.0187929	0.0386845
RFNG	1.40084	0	2.35531	46.0227	74.2489	57.6823	34.3154	5.10079	4.90254e-09	9.46603e-08
ICAM3	0	0	0	5.75283	0	16.9654	34.128	5.09288	0.017213	0.0359747
PYCARD	0	0	0	5.75283	0	16.9654	34.128	5.09288	0.0172311	0.0360027
VOPP1	5.60338	5.27073	3.53296	138.068	116.677	244.301	33.9228	5.08418	1.89745e-18	2.85674e-16
FRMD5	1.40084	0	0	20.1349	31.8209	23.7515	33.8396	5.08064	6.1071e-05	0.000321834
DPYSL4	0	0	1.17765	17.2585	21.214	33.9307	33.8352	5.08045	6.83413e-05	0.000354338
RILPL2	0	0	1.17765	20.1349	21.214	30.5377	33.8331	5.08036	6.01805e-05	0.000317986
NHEJ1	0	1.75691	0	25.8877	15.9105	27.1446	33.8201	5.07981	6.07171e-05	0.000320395
F2RL3	1.40084	3.51382	2.35531	8.62925	106.07	152.688	33.8027	5.07906	6.72514e-09	1.25302e-07
NEU1	2.80169	8.78455	9.42124	218.608	185.622	322.342	33.65	5.07253	1.71196e-22	4.52491e-20
SYNM	1.40084	1.75691	1.17765	69.034	53.0349	40.7169	33.5506	5.06827	6.3303e-09	1.18946e-07
ANKRD36C	0	0	0	23.0113	0	0	33.5397	5.0678	0.0240187	0.0470872
ZNF576	0	0	0	2.87642	0	20.3584	33.5263	5.06722	0.0201356	0.0408273
HSD11B1L	0	0	0	2.87642	0	20.3584	33.5263	5.06722	0.0201585	0.0408668
TBXAS1	0	0	0	2.87642	0	20.3584	33.5263	5.06722	0.0202288	0.0409952
C1orf56	0	0	0	2.87642	0	20.3584	33.5263	5.06722	0.0202993	0.0410485
TATDN2	0	5.27073	1.17765	86.2925	63.6419	57.6823	33.4955	5.0659	1.11517e-10	3.20382e-09
THAP3	2.80169	0	0	23.0113	15.9105	78.0407	33.4637	5.06453	2.92999e-06	2.3707e-05
SYCE1L	0	0	0	0	0	23.7515	33.4629	5.06449	0.0248147	0.0483181
CDRT4	0	0	0	0	0	23.7515	33.4629	5.06449	0.0248088	0.0483181
NPIPA3	0	0	0	0	0	23.7515	33.4629	5.06449	0.0248551	0.0483535
gene:ENSG00000254692	0	0	0	0	0	23.7515	33.4629	5.06449	0.0248957	0.0483997
URGCP-MRPS24	0	0	0	0	0	23.7515	33.4629	5.06449	0.0249035	0.0484022
gene:ENSG00000285641	0	0	0	0	0	23.7515	33.4629	5.06449	0.0249113	0.0484063
GK5	0	0	0	5.75283	21.214	0	33.1838	5.05241	0.0196681	0.0401532
AEBP1	0	1.75691	0	17.2585	10.607	40.7169	33.1033	5.0489	0.000104142	0.000504268
BMX	4.20253	1.75691	2.35531	48.8991	185.622	74.6476	32.9846	5.04372	9.26716e-12	3.59343e-10
ENAH	1.40084	0	2.35531	74.7868	74.2489	10.1792	32.8317	5.03702	1.83939e-07	2.18122e-06
AGAP5	0	0	0	17.2585	5.30349	0	32.7354	5.03278	0.020034	0.0407114
GRAPL	0	0	0	17.2585	5.30349	0	32.7354	5.03278	0.0200701	0.040757
ZNF611	0	0	0	17.2585	5.30349	0	32.7354	5.03278	0.0200898	0.0407649
AHRR	4.20253	3.51382	0	115.057	74.2489	61.0753	32.6592	5.02942	1.39615e-11	5.03207e-10
NUDT16	2.80169	0	0	28.7642	42.4279	47.503	32.6409	5.02861	8.30362e-07	8.05136e-06
TSPAN15	4.20253	5.27073	0	43.1462	127.284	142.509	32.6321	5.02822	4.3407e-12	1.83079e-10
WSCD1	1.40084	0	3.53296	43.1462	58.3384	101.792	32.3948	5.01769	5.7559e-10	1.44432e-08
SH3BGRL2	0	0	1.17765	25.8877	37.1244	10.1792	32.3787	5.01697	0.00010635	0.000513156
SHTN1	0	1.75691	0	23.0113	37.1244	13.5723	32.1657	5.00745	9.17119e-05	0.000452623
THBS3	0	0	1.17765	20.1349	26.5175	23.7515	32.1637	5.00736	7.11135e-05	0.000366468
ZFYVE28	1.40084	0	0	28.7642	21.214	16.9654	32.1515	5.00682	8.09106e-05	0.000408082
BRD3OS	0	0	1.17765	14.3821	10.607	40.7169	31.9717	4.99872	0.000141569	0.000660323
SLC2A6	5.60338	0	0	48.8991	47.7314	105.185	31.9665	4.99849	1.0875e-09	2.54365e-08
ALX1	0	0	0	17.2585	0	3.39307	31.948	4.99765	0.0206508	0.0415812
ADTRP	0	0	0	17.2585	0	3.39307	31.948	4.99765	0.0206781	0.0416143
RGS10	1.40084	0	2.35531	23.0113	42.4279	88.2199	31.5807	4.98097	9.66597e-08	1.25922e-06
CD82	1.40084	1.75691	0	31.6406	15.9105	61.0753	31.551	4.97961	1.94462e-06	1.64856e-05
TFPI	2.80169	1.75691	7.06593	97.7981	201.533	128.937	31.5125	4.97785	5.69455e-16	5.46218e-14
MT-CYB	127.477	112.442	68.304	3166.93	3293.47	3114.84	31.4741	4.97609	8.26783e-29	8.93978e-26
SLFN11	1.40084	3.51382	0	120.809	31.8209	10.1792	31.4545	4.97519	5.70292e-07	5.85756e-06
COQ4	0	0	2.35531	20.1349	10.607	74.6476	31.398	4.9726	9.92157e-06	6.82122e-05
HIGD2A	1.40084	3.51382	1.17765	31.6406	31.8209	135.723	30.9332	4.95109	1.03333e-08	1.8329e-07
EGFR	0	1.75691	0	37.3934	31.8209	0	30.8477	4.94709	0.000295834	0.00123073
MCTP1	1.40084	1.75691	3.53296	69.034	143.194	27.1446	30.6132	4.93608	5.79099e-10	1.45006e-08
FBXL7	2.80169	0	0	17.2585	47.7314	47.503	30.6078	4.93583	2.47545e-06	2.03617e-05
IER3	8.40507	3.51382	3.53296	94.9217	143.194	257.874	30.5819	4.93461	1.36088e-16	1.4452e-14
PKD1L1	0	0	0	0	5.30349	16.9654	30.57	4.93405	0.0237396	0.046617
KCNN3	0	0	0	0	5.30349	16.9654	30.57	4.93405	0.0237544	0.0466383
TGOLN2	5.60338	10.5415	10.5989	290.518	381.851	173.047	30.5209	4.93173	6.73095e-24	2.41024e-21
ZNF480	0	0	1.17765	23.0113	21.214	20.3584	30.4843	4.92999	9.17692e-05	0.000452718
KIF21B	0	0	1.17765	31.6406	10.607	16.9654	30.4707	4.92935	0.000141716	0.000660491
LTO1	0	0	1.17765	25.8877	5.30349	27.1446	30.4707	4.92935	0.000157694	0.000723335
TMEM14B	0	0	1.17765	11.5057	10.607	40.7169	30.4572	4.92871	0.000228567	0.000991097
OAS2	0	1.75691	0	2.87642	31.8209	33.9307	30.4016	4.92607	0.000297217	0.00123346
CTSL	7.00422	14.0553	7.06593	281.889	169.712	386.81	30.3979	4.9259	8.46751e-24	2.72196e-21
LY6G5B	0	0	0	8.62925	15.9105	0	30.3743	4.92478	0.0214972	0.0429654
LHX4	0	0	0	8.62925	15.9105	0	30.3743	4.92478	0.0215276	0.0430046
CBWD3	0	0	0	8.62925	15.9105	0	30.3743	4.92478	0.0215604	0.0430556
TNFRSF11A	1.40084	0	0	31.6406	26.5175	6.78615	30.3266	4.92251	0.000173028	0.000781605
CPTP	1.40084	0	3.53296	34.517	26.5175	122.151	30.2077	4.91684	2.79094e-08	4.29993e-07
PKHD1L1	0	0	0	0	21.214	3.39307	30.0916	4.91129	0.0254444	0.0492399
TMOD1	0	0	0	0	21.214	3.39307	30.0916	4.91129	0.0254655	0.0492498
GOLGA8T	0	0	0	0	21.214	3.39307	30.0916	4.91129	0.0254699	0.0492503
TUSC1	0	0	0	2.87642	15.9105	6.78615	29.9145	4.90277	0.0202854	0.0410483
NUDT7	0	0	0	2.87642	15.9105	6.78615	29.9145	4.90277	0.020286	0.0410483
AASS	0	0	0	2.87642	15.9105	6.78615	29.9145	4.90277	0.0202999	0.0410485
B3GALNT1	0	0	0	5.75283	15.9105	3.39307	29.9126	4.90268	0.0199996	0.0406625
TLR6	0	0	0	5.75283	15.9105	3.39307	29.9126	4.90268	0.0200086	0.0406738
CD163L1	0	0	0	5.75283	15.9105	3.39307	29.9126	4.90268	0.0200144	0.0406787
PXMP2	0	0	0	5.75283	15.9105	3.39307	29.9126	4.90268	0.0200376	0.0407119
RGS17	0	0	0	2.87642	10.607	10.1792	29.9107	4.90259	0.019685	0.0401739
GNRH1	0	0	0	2.87642	10.607	10.1792	29.9107	4.90259	0.0196833	0.0401739
ZNF888	0	0	0	2.87642	10.607	10.1792	29.9107	4.90259	0.0197042	0.0401993
PDE3A	0	0	0	5.75283	10.607	6.78615	29.9088	4.9025	0.0184623	0.0381432
ZNF432	0	0	0	5.75283	10.607	6.78615	29.9088	4.9025	0.0184607	0.0381432
SLC18B1	0	0	0	5.75283	10.607	6.78615	29.9088	4.9025	0.0184728	0.0381583
CCDC74A	0	0	0	5.75283	10.607	6.78615	29.9088	4.9025	0.0185078	0.0382107
SOWAHC	0	0	0	8.62925	10.607	3.39307	29.9069	4.90241	0.0190565	0.0390677
ZNF484	0	0	0	8.62925	10.607	3.39307	29.9069	4.90241	0.0190542	0.0390677
NUTM2E	0	0	0	8.62925	10.607	3.39307	29.9069	4.90241	0.0190576	0.0390677
SLC16A5	0	0	0	8.62925	10.607	3.39307	29.9069	4.90241	0.0190637	0.0390735
GATA6	0	0	0	8.62925	10.607	3.39307	29.9069	4.90241	0.0190937	0.0391216
NACAD	0	0	0	2.87642	5.30349	13.5723	29.9069	4.90241	0.0206249	0.0415586
ZNF250	0	0	0	2.87642	5.30349	13.5723	29.9069	4.90241	0.0206224	0.0415586
ATF7IP2	0	0	0	2.87642	5.30349	13.5723	29.9069	4.90241	0.020624	0.0415586
ZNF552	0	0	0	2.87642	5.30349	13.5723	29.9069	4.90241	0.0206256	0.0415586
CCDC96	0	0	0	5.75283	5.30349	10.1792	29.905	4.90231	0.0187677	0.0386399
NRN1	0	0	0	5.75283	5.30349	10.1792	29.905	4.90231	0.0188323	0.0387395
CDCA5	0	0	0	5.75283	5.30349	10.1792	29.905	4.90231	0.0188999	0.0388381
ZKSCAN2	0	0	0	5.75283	5.30349	10.1792	29.905	4.90231	0.0189279	0.0388891
FBXL8	0	0	0	5.75283	5.30349	10.1792	29.905	4.90231	0.0189501	0.0389077
PRELID3A	0	0	0	5.75283	5.30349	10.1792	29.905	4.90231	0.0189489	0.0389077
TUBA8	0	0	0	5.75283	5.30349	10.1792	29.905	4.90231	0.0189477	0.0389077
C2CD4B	0	0	0	8.62925	5.30349	6.78615	29.9031	4.90222	0.0185846	0.0383359
LRRC23	0	0	0	8.62925	5.30349	6.78615	29.9031	4.90222	0.0185947	0.0383437
SLC25A51	0	0	0	8.62925	5.30349	6.78615	29.9031	4.90222	0.018605	0.0383581
ZNF599	0	0	0	8.62925	5.30349	6.78615	29.9031	4.90222	0.0186092	0.0383589
ZNF350	0	0	0	8.62925	5.30349	6.78615	29.9031	4.90222	0.0186118	0.0383589
ZNF549	0	0	0	11.5057	5.30349	3.39307	29.9012	4.90213	0.0198513	0.0404508
ARHGAP28	0	0	0	11.5057	5.30349	3.39307	29.9012	4.90213	0.0198791	0.0404866
CCNA1	0	0	0	11.5057	5.30349	3.39307	29.9012	4.90213	0.019907	0.0405292
ZNF10	0	0	0	11.5057	5.30349	3.39307	29.9012	4.90213	0.0199282	0.0405589
F3	0	0	0	11.5057	5.30349	3.39307	29.9012	4.90213	0.0199589	0.0406005
CDPF1	0	0	0	5.75283	0	13.5723	29.9012	4.90213	0.0209388	0.0420473
IL4I1	0	0	0	5.75283	0	13.5723	29.9012	4.90213	0.0210084	0.0421729
PHACTR1	0	0	0	5.75283	0	13.5723	29.9012	4.90213	0.0210144	0.0421777
PEX11A	0	0	0	5.75283	0	13.5723	29.9012	4.90213	0.0210211	0.0421841
H2BC12	0	0	0	5.75283	0	13.5723	29.9012	4.90213	0.0210338	0.0422016
STK32B	0	0	0	5.75283	0	13.5723	29.9012	4.90213	0.0210514	0.0422164
ARHGEF19	0	0	0	8.62925	0	10.1792	29.8993	4.90204	0.0197666	0.0403196
RGS11	0	0	0	8.62925	0	10.1792	29.8993	4.90204	0.0198039	0.0403819
CACNG6	0	0	0	8.62925	0	10.1792	29.8993	4.90204	0.019808	0.0403834
ZNF880	0	0	0	8.62925	0	10.1792	29.8993	4.90204	0.0198411	0.0404369
EEF1AKMT3	0	0	0	11.5057	0	6.78615	29.8974	4.90195	0.0202728	0.0410389
SLC2A10	0	0	0	11.5057	0	6.78615	29.8974	4.90195	0.0202969	0.0410485
RCN1	57.4346	35.1382	38.8626	914.7	1267.53	1757.61	29.6981	4.8923	4.154e-25	2.14816e-22
DCTD	4.20253	1.75691	2.35531	117.933	47.7314	95.0061	29.629	4.88894	2.79345e-12	1.22152e-10
PWWP2B	1.40084	0	1.17765	11.5057	31.8209	61.0753	29.6228	4.88863	6.00742e-06	4.41063e-05
TSPAN18	4.20253	1.75691	5.88827	80.5396	137.891	176.44	29.5488	4.88503	2.42264e-15	2.08804e-13
CCDC159	1.40084	0	0	11.5057	5.30349	44.11	29.3797	4.87675	0.000333813	0.00135646
AGPAT2	5.60338	0	2.35531	51.7755	31.8209	176.44	29.2086	4.86832	1.24378e-09	2.87811e-08
TRIM65	1.40084	1.75691	1.17765	60.4047	31.8209	44.11	29.1861	4.86721	4.09487e-08	5.96136e-07
ITGA2	7.00422	7.02764	9.42124	480.361	185.622	40.7169	29.1623	4.86603	1.18477e-13	7.15315e-12
DNALI1	0	0	0	2.87642	0	16.9654	29.1284	4.86436	0.0250719	0.0486547
PNPLA4	0	0	0	2.87642	0	16.9654	29.1284	4.86436	0.0250718	0.0486547
FUOM	0	0	0	2.87642	0	16.9654	29.1284	4.86436	0.0250945	0.048667
CDK3	0	0	0	2.87642	0	16.9654	29.1284	4.86436	0.025091	0.048667
ZNF232	0	0	0	2.87642	0	16.9654	29.1284	4.86436	0.0251018	0.048668
NME3	2.80169	1.75691	1.17765	25.8877	42.4279	115.365	28.8791	4.85195	2.12998e-08	3.37039e-07
OSGIN1	15.4093	8.78455	5.88827	537.89	185.622	156.081	28.8638	4.85119	5.56483e-18	7.69629e-16
L3HYPDH	0	0	1.17765	17.2585	21.214	23.7515	28.8145	4.84873	0.000154034	0.000709286
NOL9	1.40084	0	0	17.2585	21.214	23.7515	28.8127	4.84863	0.000157769	0.000723403
YDJC	0	1.75691	0	23.0113	5.30349	27.1446	28.7961	4.8478	0.000232584	0.00100558
DNAAF10	0	0	0	14.3821	5.30349	0	28.7854	4.84726	0.0250939	0.048667
CYREN	1.40084	0	1.17765	31.6406	42.4279	30.5377	28.5885	4.83736	1.47387e-06	1.30725e-05
SYTL3	0	0	0	14.3821	0	3.39307	28.4715	4.83145	0.0249051	0.0484022
TOR4A	2.80169	0	3.53296	66.1576	58.3384	91.613	28.3868	4.82715	1.89359e-11	6.6599e-10
ST3GAL1	0	8.78455	3.53296	152.45	132.587	61.0753	28.2324	4.81928	5.13816e-13	2.69221e-11
PSMB8	0	1.75691	2.35531	37.3934	15.9105	81.4338	28.12	4.81353	3.65055e-07	3.99077e-06
TXNDC5	21.0127	57.978	56.5274	1196.59	1575.14	1051.85	28.0867	4.81181	3.03844e-23	9.0348e-21
PXDC1	4.20253	7.02764	5.88827	129.439	159.105	206.978	28.0164	4.8082	3.74087e-19	6.44839e-17
DFFA	1.40084	1.75691	3.53296	74.7868	90.1594	57.6823	27.9372	4.80411	1.82445e-11	6.51708e-10
TMEM123	4.20253	5.27073	8.24358	218.608	212.14	91.613	27.606	4.78691	5.4164e-18	7.57914e-16
GIMAP7	1.40084	0	1.17765	25.8877	31.8209	40.7169	27.5718	4.78512	2.20789e-06	1.84108e-05
PEX10	0	1.75691	1.17765	40.2698	15.9105	33.9307	27.5508	4.78402	3.33429e-06	2.65983e-05
C11orf96	0	1.75691	1.17765	34.517	10.607	44.11	27.515	4.78214	5.06461e-06	3.82224e-05
KDELR3	1.40084	1.75691	0	46.0227	31.8209	16.9654	27.2089	4.76601	4.28461e-06	3.31347e-05
IL18BP	1.40084	0	0	2.87642	26.5175	30.5377	27.2008	4.76558	0.000568179	0.00212274
RNF152	0	0	1.17765	14.3821	37.1244	13.5723	27.1531	4.76304	0.000316807	0.00129845
GPR153	0	0	1.17765	14.3821	31.8209	16.9654	27.1496	4.76286	0.000262168	0.00111286
BORCS8	0	0	1.17765	11.5057	21.214	27.1446	27.1444	4.76258	0.000277834	0.00116563
ZNF783	0	0	1.17765	11.5057	21.214	27.1446	27.1444	4.76258	0.000279404	0.00116974
KRT10	0	0	1.17765	17.2585	21.214	20.3584	27.141	4.7624	0.000224113	0.000973914
ZNF528	1.40084	0	0	14.3821	10.607	30.5377	27.134	4.76203	0.00031232	0.00128449
RWDD2A	1.40084	0	0	23.0113	15.9105	16.9654	27.1324	4.76194	0.000233915	0.0010106
C17orf80	0	1.75691	0	25.8877	15.9105	13.5723	27.1288	4.76175	0.000264942	0.00112263
RPL17-C18orf32	1.40084	0	0	31.6406	26.5175	0	27.0998	4.76021	0.000762908	0.00272003
TREX1	0	1.75691	1.17765	23.0113	15.9105	54.2892	27.0876	4.75956	6.66574e-06	4.84315e-05
CFLAR	16.8101	8.78455	16.4872	373.934	525.046	305.377	27.0382	4.75693	2.40953e-24	1.10227e-21
AP5Z1	2.80169	0	4.71062	89.1689	68.9454	81.4338	26.7856	4.74338	2.75087e-12	1.20734e-10
GADD45B	0	1.75691	1.17765	23.0113	47.7314	30.5377	26.5689	4.73166	3.93471e-06	3.07688e-05
FBXO7	0	5.27073	4.71062	92.0453	53.0349	128.937	26.5676	4.7316	1.52761e-12	7.21009e-11
PECAM1	130.279	115.956	91.8571	1863.92	3526.82	3572.91	26.4899	4.72737	2.25098e-25	1.21696e-22
CD93	32.2194	28.1106	24.7307	791.014	1076.61	407.169	26.4836	4.72703	1.44909e-23	4.53566e-21
SHISA5	8.40507	14.0553	12.9542	253.125	233.354	444.493	26.0473	4.70306	5.25011e-23	1.48678e-20
ARHGEF10	4.20253	1.75691	0	74.7868	63.6419	27.1446	25.8165	4.69022	1.41426e-08	2.37588e-07
YJU2B	0	0	3.53296	43.1462	15.9105	61.0753	25.7585	4.68698	3.83305e-07	4.15212e-06
SP140L	1.40084	1.75691	1.17765	31.6406	63.6419	40.7169	25.5932	4.67769	9.26129e-08	1.21583e-06
LRRC27	0	0	1.17765	11.5057	21.214	23.7515	25.4706	4.67076	0.000354226	0.00142626
FAM89A	0	0	1.17765	14.3821	21.214	20.3584	25.469	4.67067	0.000313361	0.00128788
NAPRT	1.40084	0	0	11.5057	15.9105	27.1446	25.4657	4.67049	0.000387476	0.00154135
CCDC167	0	0	1.17765	17.2585	10.607	23.7515	25.4609	4.67021	0.000342881	0.00138904
RPL17	47.6287	63.2488	48.2838	782.385	625.812	2609.27	25.2073	4.65577	3.08261e-18	4.52648e-16
BBS7	0	0	1.17765	28.7642	10.607	10.1792	25.1128	4.65035	0.000490764	0.00187871
TSPYL5	0	0	0	5.75283	10.607	3.39307	25.0977	4.64948	0.0255209	0.0492904
ZNF607	0	0	0	5.75283	10.607	3.39307	25.0977	4.64948	0.0255541	0.049293
C1orf226	0	0	0	5.75283	10.607	3.39307	25.0977	4.64948	0.0255702	0.0493081
ZNF586	0	0	0	5.75283	5.30349	6.78615	25.0945	4.6493	0.0254479	0.0492399
LENG9	0	0	0	5.75283	5.30349	6.78615	25.0945	4.6493	0.0254637	0.0492498
ZNF615	0	0	0	5.75283	5.30349	6.78615	25.0945	4.6493	0.0254849	0.0492714
CFH	0	0	0	5.75283	5.30349	6.78615	25.0945	4.6493	0.025532	0.0492904
RPS6KL1	0	0	0	5.75283	5.30349	6.78615	25.0945	4.6493	0.0255294	0.0492904
ZBTB42	0	0	0	5.75283	5.30349	6.78615	25.0945	4.6493	0.0255176	0.0492904
SPATA33	0	0	0	5.75283	5.30349	6.78615	25.0945	4.6493	0.0255059	0.0492904
SFXN4	0	0	0	5.75283	5.30349	6.78615	25.0945	4.6493	0.0255412	0.0492922
CCDC150	0	0	0	5.75283	5.30349	6.78615	25.0945	4.6493	0.0255486	0.049293
RPL39L	0	0	0	5.75283	5.30349	6.78615	25.0945	4.6493	0.0255532	0.049293
PLCL1	0	0	0	5.75283	5.30349	6.78615	25.0945	4.6493	0.0255652	0.0493064
GSDMD	0	0	3.53296	25.8877	21.214	71.2546	25.0655	4.64763	9.51606e-07	9.00707e-06
NDUFAF8	5.60338	0	1.17765	43.1462	10.607	135.723	25.0185	4.64492	1.07063e-07	1.3722e-06
SRPX2	2.80169	7.02764	3.53296	83.4161	95.4628	156.081	24.9852	4.643	1.33e-13	7.87678e-12
EFNA4	0	1.75691	0	14.3821	5.30349	30.5377	24.9751	4.64242	0.000529281	0.00200359
DPP7	11.2068	0	5.88827	89.1689	74.2489	291.804	24.9449	4.64067	1.74404e-12	8.0091e-11
PFKP	7.00422	5.27073	10.5989	230.113	127.284	237.515	24.8684	4.63624	4.78248e-20	9.64115e-18
MRPL53	2.80169	0	1.17765	20.1349	10.607	88.2199	24.8129	4.63302	3.55893e-06	2.822e-05
KXD1	2.80169	3.51382	5.88827	94.9217	84.8559	145.902	24.7619	4.63005	1.06936e-13	6.48924e-12
CYP2R1	0	1.75691	0	11.5057	37.1244	10.1792	24.7225	4.62775	0.000521599	0.00197828
C4orf3	1.40084	3.51382	2.35531	46.0227	79.5524	74.6476	24.696	4.6262	2.86939e-10	7.58411e-09
SLC17A5	1.40084	1.75691	5.88827	109.304	90.1594	57.6823	24.5854	4.61973	7.14828e-12	2.90176e-10
RASSF7	0	0	2.35531	14.3821	5.30349	61.0753	24.3518	4.60595	7.4862e-05	0.000382807
gene:ENSG00000273154	0	0	1.17765	14.3821	0	33.9307	24.34	4.60526	0.00101455	0.00347354
QSOX1	29.4177	24.5967	32.9743	627.059	631.115	899.165	24.3339	4.6049	9.85347e-27	6.89395e-24
GCNT2	1.40084	1.75691	2.35531	74.7868	42.4279	30.5377	23.9397	4.58133	2.04504e-08	3.25184e-07
SLC26A11	2.80169	1.75691	1.17765	43.1462	47.7314	61.0753	23.8971	4.57876	6.2631e-09	1.18056e-07
JMJD4	1.40084	0	1.17765	14.3821	31.8209	40.7169	23.8832	4.57793	1.34461e-05	8.82603e-05
SDC4	0	0	1.17765	17.2585	26.5175	10.1792	23.7968	4.5727	0.000451213	0.00174926
RBFA	0	1.75691	0	14.3821	5.30349	27.1446	23.7831	4.57186	0.000539216	0.00203555
FAM124B	0	7.02764	1.17765	25.8877	121.98	50.8961	23.6842	4.56585	2.82314e-08	4.3383e-07
TMEM126B	2.80169	0	0	25.8877	31.8209	27.1446	23.5184	4.55572	8.60362e-06	6.03257e-05
THEM4	0	1.75691	1.17765	20.1349	26.5175	37.3238	23.5183	4.55571	9.83304e-06	6.77602e-05
CLSTN3	1.40084	0	1.17765	37.3934	21.214	20.3584	23.508	4.55508	1.16861e-05	7.84393e-05
C15orf40	0	3.51382	0	25.8877	15.9105	37.3238	23.5062	4.55497	1.31504e-05	8.67985e-05
CMTM7	4.20253	1.75691	5.88827	69.034	68.9454	166.261	23.2946	4.54193	2.16715e-12	9.76368e-11
GUK1	15.4093	10.5415	2.35531	155.326	53.0349	451.279	23.0807	4.52862	7.73127e-12	3.07544e-10
PTPRF	11.2068	8.78455	7.06593	264.63	233.354	135.723	22.9899	4.52293	3.2484e-19	5.85402e-17
MEAK7	1.40084	3.51382	0	54.6519	31.8209	23.7515	22.9013	4.51736	7.18754e-07	7.13594e-06
C19orf44	0	0	1.17765	2.87642	31.8209	16.9654	22.8834	4.51623	0.000960037	0.00332228
PLEKHO1	4.20253	14.0553	9.42124	138.068	84.8559	413.955	22.8426	4.51366	6.29569e-14	4.02586e-12
HDAC11	0	1.75691	0	2.87642	21.214	27.1446	22.8373	4.51332	0.000878027	0.00307879
HLA-A	39.2236	42.1658	37.6849	488.991	482.618	1757.61	22.8364	4.51326	9.71963e-18	1.3137e-15
ALG12	2.80169	1.75691	1.17765	51.7755	21.214	61.0753	22.7464	4.50757	4.13815e-08	6.00233e-07
SEMA3D	0	0	2.35531	23.0113	53.0349	3.39307	22.615	4.49921	0.000118986	0.000565184
TICAM1	0	0	2.35531	17.2585	21.214	40.7169	22.6129	4.49908	2.30083e-05	0.000138703
MRNIP	8.40507	0	0	60.4047	121.98	27.1446	22.5356	4.49413	1.29459e-08	2.22191e-07
SSH3	2.80169	0	0	23.0113	31.8209	27.1446	22.5069	4.49229	1.27308e-05	8.45923e-05
MTRFR	0	0	1.17765	5.75283	10.607	30.5377	22.4883	4.49111	0.000902937	0.00315312
TK2	2.80169	0	4.71062	66.1576	42.4279	88.2199	22.464	4.48954	1.27637e-10	3.62318e-09
CCNJL	0	0	1.17765	8.62925	31.8209	13.5723	22.4215	4.48681	0.000709274	0.00255485
GORASP1	1.40084	1.75691	3.53296	71.9104	58.3384	40.7169	22.355	4.48253	1.88443e-09	4.11255e-08
NMRK1	0	1.75691	3.53296	25.8877	58.3384	61.0753	22.3053	4.47932	8.63059e-08	1.14312e-06
KYAT3	1.40084	0	0	11.5057	21.214	16.9654	22.1216	4.46738	0.000529664	0.0020044
MRPL42	1.40084	0	0	17.2585	21.214	10.1792	22.1188	4.4672	0.000548986	0.00206504
SHPK	0	1.75691	0	17.2585	21.214	10.1792	22.1173	4.4671	0.000566068	0.0021179
SCN5A	0	1.75691	0	14.3821	15.9105	16.9654	22.1158	4.46701	0.000492879	0.00188542
RCCD1	1.40084	0	0	23.0113	15.9105	6.78615	22.1131	4.46683	0.000682694	0.00246957
ELP6	0	0	1.17765	20.1349	10.607	13.5723	22.1131	4.46683	0.000490421	0.001878
COQ8A	0	0	1.17765	14.3821	5.30349	23.7515	22.1131	4.46683	0.00062098	0.00229021
UBE2L6	0	3.51382	3.53296	37.3934	53.0349	81.4338	22.0843	4.46495	6.43652e-09	1.20561e-07
B3GALT6	1.40084	1.75691	3.53296	25.8877	21.214	118.758	22.0526	4.46288	2.02852e-07	2.37239e-06
C7orf50	4.20253	0	5.88827	54.6519	31.8209	162.868	22.0266	4.46118	1.65399e-09	3.7048e-08
LYRM2	1.40084	3.51382	0	43.1462	47.7314	20.3584	21.9405	4.45552	9.77859e-07	9.21605e-06
LHFPL2	4.20253	5.27073	1.17765	66.1576	116.677	61.0753	21.8632	4.45043	9.51756e-12	3.66349e-10
NPC2	23.8144	12.2984	22.3754	258.877	281.085	749.869	21.5842	4.4319	1.05434e-18	1.69465e-16
CD44	14.0084	17.5691	21.1978	537.89	249.264	356.273	21.4626	4.42375	1.03067e-21	2.45176e-19
FEZ1	8.40507	7.02764	7.06593	146.697	127.284	217.157	21.4444	4.42253	3.93509e-19	6.68628e-17
HSDL1	4.20253	1.75691	1.17765	43.1462	58.3384	67.8615	21.4385	4.42213	2.56031e-09	5.33316e-08
UNC13B	11.2068	3.51382	4.71062	94.9217	201.533	149.295	21.3838	4.41845	1.76361e-15	1.5654e-13
TACC1	29.4177	24.5967	17.6648	442.968	779.613	322.342	21.3331	4.41502	2.68446e-22	6.94108e-20
ZNF672	2.80169	0	1.17765	23.0113	26.5175	54.2892	21.2751	4.4111	1.67614e-06	1.45518e-05
NMI	2.80169	0	1.17765	23.0113	37.1244	47.503	21.2251	4.4077	1.19327e-06	1.08923e-05
GPR162	1.40084	1.75691	1.17765	14.3821	42.4279	50.8961	21.1398	4.40189	2.5143e-06	2.06384e-05
STING1	9.80591	7.02764	5.88827	115.057	95.4628	278.232	21.1065	4.39961	1.15918e-15	1.07011e-13
NDUFA4	2.80169	3.51382	4.71062	51.7755	58.3384	139.116	21.0913	4.39858	6.76405e-11	2.06816e-09
PSAP	159.696	149.337	161.339	2700.95	2847.97	4377.07	21.0547	4.39607	2.19646e-23	6.69864e-21
SLC35G2	0	0	1.17765	17.2585	26.5175	3.39307	20.947	4.38867	0.0010131	0.00347058
KLHDC8B	9.80591	1.75691	1.17765	34.517	74.2489	173.047	20.9284	4.38739	1.05605e-09	2.48726e-08
COX14	0	0	3.53296	20.1349	31.8209	50.8961	20.9044	4.38573	2.50339e-06	2.05772e-05
COMMD6	2.80169	0	4.71062	34.517	63.6419	91.613	20.8804	4.38408	2.5592e-09	5.33316e-08
SLFN5	2.80169	8.78455	4.71062	195.596	111.373	37.3238	20.875	4.3837	2.07344e-11	7.21095e-10
CBS	5.60338	0	0	83.4161	15.9105	30.5377	20.8618	4.38279	1.23962e-06	1.12378e-05
TMEM109	18.211	5.27073	3.53296	155.326	148.498	268.053	20.7609	4.3758	9.57586e-17	1.07448e-14
REPIN1	0	5.27073	8.24358	117.933	90.1594	91.613	20.7501	4.37504	4.06852e-13	2.17978e-11
GMPR	4.20253	3.51382	2.35531	37.3934	63.6419	118.758	20.6704	4.36949	2.02873e-10	5.55985e-09
MTURN	0	3.51382	1.17765	25.8877	53.0349	30.5377	20.5024	4.35772	1.45243e-06	1.29176e-05
SMIM10L1	1.40084	0	2.35531	31.6406	37.1244	33.9307	20.4961	4.35728	9.24962e-07	8.78714e-06
SCD5	2.80169	1.75691	1.17765	51.7755	37.1244	37.3238	20.492	4.35699	3.98354e-08	5.82783e-07
IL6ST	21.0127	26.3537	27.0861	793.891	678.847	67.8615	20.487	4.35664	2.86023e-13	1.58231e-11
AKNA	1.40084	1.75691	0	20.1349	15.9105	33.9307	20.4729	4.35564	3.4332e-05	0.000195661
CFI	1.40084	0	0	14.3821	26.5175	6.78615	20.4491	4.35397	0.000873575	0.00306499
RHPN1	0	0	1.17765	8.62925	15.9105	20.3584	20.4478	4.35388	0.000767401	0.00273277
PDXP	0	1.75691	0	14.3821	15.9105	13.5723	20.4426	4.3535	0.000627583	0.0023067
GSTT2B	0	0	1.17765	11.5057	5.30349	23.7515	20.4413	4.35342	0.000891751	0.00312231
SEC31B	0	1.75691	0	17.2585	15.9105	10.1792	20.4413	4.35341	0.000678231	0.00245791
PPP2R3B	0	0	2.35531	20.1349	10.607	37.3238	20.4198	4.35189	5.08198e-05	0.000275376
KLHL21	12.6076	3.51382	7.06593	256.001	159.105	78.0407	20.3464	4.3467	2.4619e-15	2.09156e-13
CYB561A3	4.20253	3.51382	2.35531	60.4047	63.6419	88.2199	20.1702	4.33415	1.35988e-11	4.9463e-10
TNFAIP8L1	1.40084	7.02764	3.53296	34.517	58.3384	152.688	20.1186	4.33045	1.35578e-09	3.10706e-08
CNRIP1	1.40084	10.5415	7.06593	224.36	42.4279	115.365	19.9931	4.32143	8.6628e-12	3.38932e-10
FLYWCH1	7.00422	3.51382	9.42124	175.461	116.677	128.937	19.9319	4.31701	9.69284e-17	1.07745e-14
RPL39	12.6076	28.1106	47.1062	339.417	355.334	1075.6	19.9068	4.31519	1.66737e-16	1.73963e-14
CORO6	0	1.75691	2.35531	5.75283	26.5175	64.4684	19.7705	4.30528	2.72106e-05	0.000160025
DNAJC4	4.20253	0	4.71062	37.3934	21.214	139.116	19.7651	4.30489	4.81516e-08	6.85886e-07
SRRD	1.40084	0	2.35531	43.1462	15.9105	30.5377	19.7548	4.30413	1.99744e-06	1.68853e-05
ENO2	1.40084	1.75691	1.17765	40.2698	15.9105	33.9307	19.7534	4.30403	1.56013e-06	1.36946e-05
PAFAH1B3	0	1.75691	0	5.75283	5.30349	30.5377	19.7195	4.30155	0.00158742	0.00501572
IER2	5.60338	0	7.06593	54.6519	153.801	81.4338	19.6567	4.29695	1.1736e-11	4.41698e-10
ADGRL4	22.4135	10.5415	12.9542	244.495	440.19	251.087	19.6156	4.29393	9.54848e-21	2.02803e-18
ZNF320	0	1.75691	1.17765	20.1349	42.4279	13.5723	19.5417	4.28849	5.70905e-05	0.000304903
ADRB2	0	0	2.35531	20.1349	37.1244	16.9654	19.474	4.28348	4.79186e-05	0.000261442
UGGT2	0	1.75691	1.17765	23.0113	15.9105	27.1446	19.4603	4.28246	3.46991e-05	0.000197375
SERF1A	1.40084	0	0	8.62925	0	30.5377	19.3157	4.2717	0.00216175	0.00646025
TOR3A	0	5.27073	0	17.2585	21.214	61.0753	19.2979	4.27037	8.66443e-06	6.06918e-05
LRP4	1.40084	0	0	14.3821	26.5175	3.39307	19.1792	4.26147	0.00150258	0.00479392
RPS29	22.4135	7.02764	14.1319	161.079	116.677	573.429	19.1102	4.25627	3.73609e-14	2.56862e-12
PLIN3	2.80169	5.27073	3.53296	57.5283	42.4279	125.544	19.0537	4.252	1.03107e-10	2.98382e-09
EPB41L5	0	3.51382	1.17765	37.3934	26.5175	27.1446	19.0324	4.25039	2.04315e-06	1.72349e-05
COPRS	5.60338	3.51382	2.35531	77.6632	37.1244	105.185	18.9897	4.24715	4.62204e-11	1.48083e-09
RPS2	86.8524	119.47	136.608	1412.32	917.504	4166.69	18.9106	4.24112	1.86315e-15	1.6415e-13
MTG1	0	7.02764	0	34.517	26.5175	57.6823	18.8926	4.23975	3.82131e-07	4.14318e-06
KRBA2	0	1.75691	1.17765	8.62925	53.0349	10.1792	18.8747	4.23838	0.000240593	0.00103532
SERPINB1	2.80169	3.51382	5.88827	48.8991	84.8559	118.758	18.8385	4.23561	3.32662e-11	1.11143e-09
STK32C	1.40084	0	0	8.62925	10.607	20.3584	18.7705	4.2304	0.00121645	0.00402459
RECQL4	1.40084	0	0	11.5057	10.607	16.9654	18.7693	4.2303	0.00102895	0.00351277
BTN3A3	1.40084	0	0	11.5057	10.607	16.9654	18.7693	4.2303	0.00103065	0.00351551
CTU1	0	1.75691	0	8.62925	10.607	20.3584	18.7692	4.2303	0.00123002	0.00406271
TMEM218	0	0	1.17765	17.2585	10.607	10.1792	18.7681	4.23021	0.00108016	0.00365139
NOTCH2NLA	0	0	1.17765	20.1349	5.30349	10.1792	18.7646	4.22994	0.00135977	0.00440115
ATP7B	0	0	1.17765	20.1349	5.30349	10.1792	18.7646	4.22994	0.00135968	0.00440115
NSL1	1.40084	0	0	17.2585	5.30349	13.5723	18.7646	4.22994	0.00119034	0.00396245
DUSP23	0	0	1.17765	14.3821	0	20.3584	18.7645	4.22994	0.00168634	0.00525612
COL17A1	0	1.75691	0	20.1349	5.30349	10.1792	18.7621	4.22975	0.00130316	0.0042535
DOK5	0	0	1.17765	20.1349	15.9105	3.39307	18.7595	4.22955	0.00160552	0.00505957
TEDC1	0	1.75691	0	8.62925	0	30.5377	18.723	4.22674	0.00214491	0.00641799
AURKAIP1	7.00422	7.02764	1.17765	51.7755	37.1244	196.798	18.6356	4.21999	1.8789e-09	4.10801e-08
KIAA1671	4.20253	8.78455	7.06593	163.956	159.105	61.0753	18.6353	4.21997	7.96822e-14	4.98811e-12
ZNF561	1.40084	1.75691	0	23.0113	37.1244	10.1792	18.4655	4.20676	7.82418e-05	0.00039651
DNER	0	1.75691	1.17765	23.0113	31.8209	13.5723	18.4547	4.20592	5.84565e-05	0.000310949
DNASE1	1.40084	0	1.17765	20.1349	10.607	30.5377	18.4477	4.20537	5.47787e-05	0.000294148
SLC26A6	1.40084	0	1.17765	31.6406	10.607	16.9654	18.4431	4.20501	6.37901e-05	0.000333797
NADSYN1	5.60338	14.0553	8.24358	109.304	153.801	247.694	18.3679	4.19911	3.70589e-17	4.63978e-15
CCDC117	0	1.75691	2.35531	40.2698	37.1244	13.5723	18.3294	4.19609	5.57507e-06	4.15736e-05
HSPA1B	22.4135	0	7.06593	408.451	63.6419	81.4338	18.241	4.18911	4.08596e-09	8.08627e-08
GNPTG	7.00422	8.78455	4.71062	69.034	79.5524	227.336	18.1952	4.18549	2.54474e-12	1.1336e-10
DAGLB	4.20253	1.75691	1.17765	43.1462	42.4279	54.2892	18.1848	4.18466	1.79149e-08	2.89904e-07
GAMT	2.80169	0	0	11.5057	10.607	40.7169	18.1834	4.18455	0.000148597	0.00068905
BET1L	2.80169	3.51382	5.88827	115.057	42.4279	74.6476	18.1581	4.18254	5.75812e-11	1.80229e-09
UBXN6	7.00422	14.0553	3.53296	106.427	58.3384	274.839	18.0989	4.17783	8.48076e-12	3.34007e-10
PTPN18	2.80169	0	0	37.3934	0	23.7515	18.0871	4.17689	0.000254623	0.00108704
CDC42EP3	9.80591	3.51382	7.06593	103.551	196.229	105.185	18.0758	4.17599	4.98687e-15	4.03496e-13
RFXANK	4.20253	1.75691	0	17.2585	26.5175	71.2546	17.9454	4.16554	2.64359e-06	2.16102e-05
RPS19BP1	2.80169	3.51382	3.53296	63.2811	21.214	98.3991	17.8916	4.16121	2.69657e-09	5.57792e-08
HMOX1	229.739	124.741	259.084	3330.89	3044.2	4641.73	17.8507	4.15791	5.92068e-20	1.15444e-17
AKAP12	40.6245	21.0829	23.5531	906.071	493.225	132.33	17.8052	4.15423	2.72058e-14	1.92611e-12
SHARPIN	2.80169	0	3.53296	25.8877	5.30349	98.3991	17.8001	4.15382	6.54055e-06	4.76091e-05
CEP112	0	0	1.17765	5.75283	31.8209	3.39307	17.7971	4.15357	0.00343729	0.00946589
CABLES1	1.40084	5.27073	7.06593	46.0227	111.373	108.578	17.761	4.15064	5.50333e-11	1.73625e-09
MAPKAPK3	0	3.51382	4.71062	60.4047	31.8209	61.0753	17.7485	4.14962	5.5379e-09	1.05879e-07
CYFIP2	1.40084	1.75691	3.53296	20.1349	37.1244	78.0407	17.6656	4.14287	3.48741e-07	3.82297e-06
CCDC57	0	0	1.17765	2.87642	10.607	23.7515	17.6243	4.13949	0.00278748	0.00798706
MRPL20	4.20253	1.75691	3.53296	37.3934	21.214	122.151	17.6122	4.1385	5.8464e-08	8.10455e-07
UROS	2.80169	3.51382	2.35531	40.2698	10.607	108.578	17.6	4.1375	3.21583e-07	3.56469e-06
USP11	4.20253	0	0	28.7642	31.8209	27.1446	17.5874	4.13647	4.5847e-06	3.50903e-05
GCOM1	0	3.51382	2.35531	34.517	74.2489	6.78615	17.5028	4.12952	9.21301e-06	6.40441e-05
ZNF33B	0	1.75691	1.17765	11.5057	37.1244	20.3584	17.4887	4.12836	0.000106447	0.000513191
RPP38	0	0	2.35531	20.1349	15.9105	23.7515	17.4384	4.1242	8.96211e-05	0.000444382
FBXO32	0	1.75691	1.17765	14.3821	15.9105	30.5377	17.4383	4.12419	0.000103599	0.00050212
AFMID	2.80169	0	0	25.8877	10.607	20.3584	17.4318	4.12365	0.00011378	0.000543277
SH3PXD2B	8.40507	7.02764	5.88827	138.068	175.015	67.8615	17.1305	4.0985	4.29016e-14	2.90373e-12
NEB	0	0	1.17765	17.2585	10.607	6.78615	17.0949	4.0955	0.00183956	0.0056493
NLGN4Y	0	0	1.17765	17.2585	10.607	6.78615	17.0949	4.0955	0.00184702	0.00566782
NCBP2AS2	1.40084	0	0	11.5057	5.30349	16.9654	17.0938	4.0954	0.00180088	0.00554484
SLC43A1	0	0	1.17765	14.3821	5.30349	13.5723	17.0938	4.0954	0.00170726	0.00531297
TIGD5	0	0	1.17765	14.3821	5.30349	13.5723	17.0938	4.0954	0.00171255	0.00532343
LACC1	0	0	3.53296	25.8877	53.0349	0	17.0642	4.0929	0.000328411	0.00133909
gene:ENSG00000269242	0	3.51382	0	14.3821	5.30349	40.7169	17.0476	4.0915	0.000216108	0.000944994
RAC3	4.20253	0	2.35531	23.0113	31.8209	74.6476	17.0235	4.08946	3.38196e-07	3.72799e-06
CES2	4.20253	0	0	20.1349	10.607	50.8961	16.9585	4.08394	2.59353e-05	0.000154007
MTCL1	0	3.51382	5.88827	66.1576	79.5524	37.3238	16.9437	4.08267	2.98925e-09	6.15123e-08
S100A13	8.40507	8.78455	2.35531	57.5283	31.8209	244.301	16.9266	4.08122	6.86324e-09	1.27152e-07
ZBED3	1.40084	0	1.17765	23.0113	37.1244	0	16.9053	4.0794	0.000758042	0.00270512
CLN8	0	3.51382	7.06593	66.1576	100.766	37.3238	16.9009	4.07903	1.77609e-09	3.91926e-08
HIGD1A	1.40084	0	2.35531	25.8877	42.4279	20.3584	16.8687	4.07628	8.02098e-06	5.68882e-05
ISG20	0	1.75691	1.17765	11.5057	5.30349	40.7169	16.8552	4.07512	0.000330836	0.00134713
DEDD2	2.80169	1.75691	3.53296	63.2811	21.214	57.6823	16.8279	4.07278	1.40579e-08	2.36834e-07
NDUFA2	5.60338	0	3.53296	25.8877	10.607	132.33	16.8047	4.0708	2.02182e-06	1.70671e-05
HDGFL3	4.20253	0	2.35531	51.7755	53.0349	27.1446	16.7972	4.07014	8.58844e-08	1.13881e-06
OPTN	15.4093	10.5415	17.6648	230.113	228.05	301.984	16.7468	4.06581	7.20933e-24	2.41024e-21
SFXN5	1.40084	0	3.53296	34.517	42.4279	30.5377	16.5431	4.04816	7.22228e-07	7.16445e-06
DENND11	1.40084	1.75691	4.71062	43.1462	90.1594	20.3584	16.4741	4.04213	1.67406e-07	2.01531e-06
AXL	9.80591	5.27073	5.88827	175.461	79.5524	95.0061	16.4529	4.04027	9.06752e-14	5.58804e-12
NDUFAF3	0	1.75691	5.88827	46.0227	26.5175	71.2546	16.4441	4.0395	5.61443e-08	7.8378e-07
GPSM3	1.40084	0	1.17765	14.3821	10.607	30.5377	16.4245	4.03778	0.000210567	0.000925871
RFFL	1.40084	0	1.17765	28.7642	21.214	6.78615	16.3643	4.03248	0.000261375	0.00110999
CCPG1	8.40507	10.5415	10.5989	198.473	265.175	33.9307	16.3531	4.03149	8.63916e-12	3.38932e-10
TMUB1	4.20253	1.75691	1.17765	34.517	5.30349	84.8268	16.3487	4.0311	3.32264e-06	2.65231e-05
GLI4	0	0	2.35531	17.2585	5.30349	30.5377	16.3398	4.03032	0.000319966	0.00131004
MAMDC2	0	0	2.35531	23.0113	31.8209	3.39307	16.3379	4.03015	0.000547518	0.00206154
SLC7A11	43.4262	31.6244	49.4615	940.588	901.594	213.764	16.335	4.0299	2.62626e-15	2.21537e-13
EVA1B	9.80591	3.51382	2.35531	48.8991	5.30349	210.371	16.2819	4.02519	5.42699e-07	5.62761e-06
ZNF444	1.40084	5.27073	1.17765	48.8991	10.607	64.4684	16.2685	4.02401	6.3697e-07	6.4368e-06
PRKX	0	5.27073	2.35531	54.6519	47.7314	23.7515	16.2314	4.02072	1.6885e-07	2.03064e-06
SLC37A2	0	1.75691	2.35531	37.3934	15.9105	20.3584	16.1267	4.01138	1.53962e-05	9.83472e-05
NUDT5	1.40084	3.51382	7.06593	51.7755	63.6419	98.3991	16.0878	4.00789	6.35376e-11	1.96801e-09
ZNF470	1.40084	0	0	5.75283	26.5175	6.78615	16.0537	4.00483	0.00336128	0.00929746
GRHPR	8.40507	1.75691	1.17765	63.2811	37.1244	84.8268	15.9954	3.99959	1.29213e-09	2.97841e-08
TRIM21	0	0	4.71062	28.7642	47.7314	30.5377	15.982	3.99837	1.7574e-06	1.50812e-05
SOX7	7.00422	0	1.17765	25.8877	53.0349	67.8615	15.877	3.98887	1.46845e-07	1.79504e-06
TEPSIN	4.20253	1.75691	1.17765	46.0227	26.5175	44.11	15.8595	3.98727	8.46296e-08	1.12468e-06
KCTD7	0	3.51382	2.35531	48.8991	42.4279	10.1792	15.8486	3.98628	6.89369e-06	4.98442e-05
POLD4	5.60338	0	4.71062	40.2698	21.214	118.758	15.8392	3.98543	1.0494e-07	1.3479e-06
PRKAR1B	2.80169	3.51382	2.35531	20.1349	53.0349	74.6476	15.8273	3.98435	1.21642e-07	1.52779e-06
SOCS3	8.40507	5.27073	10.5989	20.1349	328.816	54.2892	15.8023	3.98206	8.19156e-08	1.09227e-06
PLEKHG4	2.80169	0	2.35531	48.8991	21.214	23.7515	15.7775	3.9798	2.4298e-06	2e-05
ZFAND2A	1.40084	1.75691	2.35531	71.9104	0	23.7515	15.7758	3.97964	3.85506e-05	0.000215673
SRXN1	60.2363	22.8398	36.5073	960.723	599.295	346.094	15.7744	3.97951	7.1747e-17	8.36626e-15
DECR2	0	3.51382	1.17765	8.62925	15.9105	54.2892	15.7376	3.97614	8.09371e-05	0.000408082
SGSH	18.211	1.75691	10.5989	117.933	148.498	237.515	15.6	3.96347	1.70617e-15	1.5258e-13
TMEM69	1.40084	0	2.35531	8.62925	37.1244	33.9307	15.5722	3.9609	5.44752e-05	0.000292783
DMAC1	1.40084	1.75691	0	5.75283	5.30349	44.11	15.5604	3.95981	0.000917073	0.00319141
JAM3	7.00422	14.0553	15.3095	140.944	217.443	227.336	15.5162	3.9557	4.25193e-18	6.09307e-16
FAM102A	5.60338	3.51382	7.06593	126.562	53.0349	81.4338	15.5158	3.95567	3.67121e-12	1.55948e-10
RELL2	0	0	1.17765	5.75283	5.30349	20.3584	15.4462	3.94918	0.00389459	0.0105182
FAM161B	0	0	1.17765	8.62925	21.214	6.78615	15.4286	3.94753	0.00321004	0.0089478
IBA57	0	0	1.17765	11.5057	21.214	3.39307	15.4276	3.94744	0.00364884	0.00994327
ZNF836	0	0	1.17765	11.5057	15.9105	6.78615	15.4256	3.94726	0.00277808	0.0079678
CTSK	0	0	1.17765	14.3821	15.9105	3.39307	15.4247	3.94717	0.00336505	0.00930357
PHLDB3	0	1.75691	0	5.75283	10.607	16.9654	15.4236	3.94707	0.00323924	0.00902283
DUSP18	0	0	1.17765	17.2585	10.607	3.39307	15.4217	3.94689	0.00361061	0.00986779
ASRGL1	0	0	3.53296	20.1349	31.8209	27.1446	15.4146	3.94623	2.10495e-05	0.00012856
P4HTM	0	1.75691	1.17765	14.3821	21.214	20.3584	15.4146	3.94623	0.000220485	0.000960602
TPMT	1.40084	0	1.17765	17.2585	10.607	23.7515	15.4107	3.94586	0.000241158	0.001037
KIF9	2.80169	0	0	17.2585	10.607	23.7515	15.4098	3.94577	0.000301245	0.00124843
SRSF8	2.80169	1.75691	1.17765	37.3934	42.4279	20.3584	15.4068	3.94549	1.8508e-06	1.58028e-05
QPCT	0	3.51382	1.17765	31.6406	15.9105	23.7515	15.4008	3.94493	2.1345e-05	0.000130193
COX7C	12.6076	7.02764	5.88827	74.7868	74.2489	251.087	15.3789	3.94288	1.89819e-11	6.6599e-10
ANKRD9	2.80169	0	2.35531	20.1349	15.9105	57.6823	15.3548	3.94061	7.08066e-06	5.0979e-05
LRATD2	1.40084	0	0	8.62925	26.5175	0	15.3442	3.93962	0.00638354	0.0158642
SLC4A11	0	0	3.53296	5.75283	26.5175	40.7169	15.2544	3.93115	0.000149327	0.000692164
DIPK2A	1.40084	0	3.53296	37.3934	47.7314	13.5723	15.2211	3.928	4.65556e-06	3.5564e-05
GNG11	35.0211	43.9228	38.8626	270.383	556.867	967.026	15.1636	3.92254	4.57589e-17	5.55364e-15
PBXIP1	8.40507	12.2984	10.5989	86.2925	175.015	223.943	15.1552	3.92175	1.88148e-15	1.64546e-13
COL27A1	2.80169	3.51382	4.71062	54.6519	79.5524	54.2892	15.11	3.91743	5.93542e-10	1.4769e-08
IDUA	2.80169	5.27073	0	20.1349	47.7314	54.2892	15.0826	3.91481	5.95626e-07	6.04985e-06
gene:ENSG00000286264	1.40084	0	0	8.62925	0	20.3584	15.0755	3.91414	0.00486346	0.0126578
C19orf25	1.40084	3.51382	2.35531	40.2698	5.30349	67.8615	15.0661	3.91323	2.14743e-06	1.79617e-05
ABHD15	2.80169	0	0	25.8877	0	23.7515	15.065	3.91313	0.000739583	0.00264719
STRIP2	2.80169	3.51382	0	54.6519	26.5175	13.5723	14.9815	3.90511	8.81314e-06	6.15523e-05
CRELD2	9.80591	3.51382	11.7765	224.36	47.7314	118.758	14.9764	3.90462	2.72767e-11	9.29596e-10
YIPF6	1.40084	1.75691	3.53296	46.0227	26.5175	37.3238	14.9344	3.90057	1.74397e-07	2.0847e-06
MPG	8.40507	1.75691	7.06593	34.517	37.1244	200.191	14.9194	3.89912	2.7366e-08	4.23266e-07
SPART	8.40507	8.78455	15.3095	192.72	233.354	78.0407	14.7592	3.88354	9.57564e-15	7.44397e-13
LDAH	0	1.75691	2.35531	17.2585	42.4279	20.3584	14.6909	3.87685	4.21564e-05	0.000233213
IRAK2	0	1.75691	5.88827	54.6519	58.3384	20.3584	14.6709	3.87488	4.74726e-07	5.01901e-06
MFSD12	2.80169	5.27073	4.71062	63.2811	21.214	105.185	14.5826	3.86618	6.95305e-09	1.28615e-07
DDA1	4.20253	5.27073	2.35531	60.4047	15.9105	95.0061	14.5399	3.86195	3.91343e-08	5.74646e-07
ZNF22	1.40084	0	1.17765	14.3821	26.5175	13.5723	14.4044	3.84844	0.000367292	0.00147189
NUDT14	4.20253	3.51382	7.06593	14.3821	26.5175	183.226	14.3585	3.84384	9.84272e-07	9.26915e-06
GPX8	1.40084	7.02764	4.71062	106.427	53.0349	30.5377	14.3054	3.83849	1.30081e-08	2.22938e-07
ANKRD13D	4.20253	3.51382	2.35531	34.517	21.214	91.613	14.1861	3.82641	1.44878e-07	1.77464e-06
TAF1D	5.60338	7.02764	8.24358	69.034	116.677	128.937	14.1624	3.824	4.48949e-12	1.88685e-10
FGD4	2.80169	0	0	17.2585	31.8209	3.39307	14.0735	3.81491	0.000960657	0.00332346
MCFD2	9.80591	21.0829	22.3754	376.81	275.782	101.792	13.9902	3.80635	5.62385e-15	4.48927e-13
D2HGDH	1.40084	0	2.35531	17.2585	21.214	30.5377	13.9581	3.80303	3.92727e-05	0.000219197
HYLS1	1.40084	1.75691	1.17765	28.7642	31.8209	10.1792	13.9562	3.80284	6.40135e-05	0.000334818
LRP11	2.80169	1.75691	0	20.1349	26.5175	23.7515	13.9562	3.80284	3.82046e-05	0.000213847
YBEY	0	0	1.17765	2.87642	5.30349	20.3584	13.9398	3.80114	0.00746629	0.0180057
COL4A6	5.60338	1.75691	2.35531	66.1576	47.7314	30.5377	13.9395	3.80111	3.03619e-08	4.60617e-07
SEMA3G	7.00422	0	3.53296	5.75283	116.677	40.7169	13.8958	3.79658	1.07211e-05	7.29082e-05
S100A16	54.6329	17.5691	36.5073	342.293	270.478	909.344	13.8546	3.79229	5.97293e-14	3.84011e-12
THBS1	661.199	212.586	250.84	3888.91	10108.5	1543.85	13.8035	3.78696	1.36846e-10	3.86614e-09
SLC37A4	0	1.75691	0	2.87642	10.607	16.9654	13.8008	3.78669	0.00603604	0.0151373
ISOC2	1.40084	3.51382	3.53296	34.517	15.9105	71.2546	13.7914	3.7857	5.81996e-07	5.94206e-06
SETD4	0	0	1.17765	11.5057	15.9105	3.39307	13.752	3.78157	0.00515497	0.0133058
TMEM186	0	0	1.17765	8.62925	10.607	10.1792	13.7511	3.78148	0.00422455	0.0112434
CLDN15	1.40084	0	0	5.75283	5.30349	16.9654	13.7494	3.78129	0.00545131	0.0139231
BLOC1S3	0	1.75691	0	11.5057	10.607	6.78615	13.7484	3.78119	0.00437143	0.0115619
CENPO	1.40084	0	0	11.5057	5.30349	10.1792	13.7476	3.78111	0.00441514	0.011649
PPP1R3D	1.40084	0	0	2.87642	26.5175	3.39307	13.7466	3.78101	0.00904983	0.0210808
PINK1	9.80591	8.78455	9.42124	74.7868	106.07	213.764	13.7373	3.78003	1.28654e-12	6.22035e-11
DAP	16.8101	14.0553	18.8425	279.012	153.801	251.087	13.7203	3.77824	6.88161e-19	1.1368e-16
NT5DC2	8.40507	8.78455	12.9542	106.427	79.5524	237.515	13.6911	3.77516	8.40164e-13	4.21642e-11
ARNTL2	2.80169	0	2.35531	46.0227	31.8209	6.78615	13.6908	3.77513	2.92235e-05	0.000170134
CLN3	2.80169	1.75691	4.71062	40.2698	31.8209	67.8615	13.6899	3.77504	3.6698e-08	5.40874e-07
SELENOW	4.20253	1.75691	15.3095	92.0453	58.3384	162.868	13.6401	3.76978	1.08855e-09	2.54365e-08
NR1H3	0	0	1.17765	2.87642	0	23.7515	13.6145	3.76707	0.0115613	0.0259405
HS1BP3	4.20253	10.5415	2.35531	83.4161	47.7314	78.0407	13.6037	3.76593	9.77567e-11	2.86384e-09
HEXB	11.2068	17.5691	20.0201	172.585	180.319	318.949	13.5756	3.76294	1.0364e-16	1.13091e-14
IRAK4	1.40084	1.75691	3.53296	31.6406	47.7314	30.5377	13.555	3.76075	7.36372e-07	7.26839e-06
ZMAT3	12.6076	17.5691	9.42124	161.079	249.264	132.33	13.552	3.76043	4.41624e-17	5.41513e-15
OVCA2	7.00422	0	5.88827	46.0227	37.1244	108.578	13.5158	3.75658	1.09292e-08	1.9258e-07
MYDGF	16.8101	14.0553	15.3095	207.102	116.677	301.984	13.5036	3.75527	1.35657e-15	1.23169e-13
MTIF3	4.20253	1.75691	0	20.1349	15.9105	47.503	13.449	3.74943	1.5239e-05	9.77105e-05
RSAD1	4.20253	3.51382	4.71062	48.8991	37.1244	88.2199	13.4189	3.7462	4.15297e-09	8.20521e-08
AKR1C1	0	0	1.17765	17.2585	0	6.78615	13.4118	3.74543	0.00773462	0.0185442
FRAT2	0	0	2.35531	11.5057	10.607	23.7515	13.3878	3.74285	0.000539987	0.00203698
CCDC92	1.40084	10.5415	4.71062	69.034	47.7314	91.613	13.3874	3.7428	2.39684e-10	6.43522e-09
NLGN1	0	1.75691	0	28.7642	0	0	13.3857	3.74262	0.0126369	0.0279012
PDE4A	1.40084	0	1.17765	17.2585	10.607	16.9654	13.3853	3.74258	0.000387646	0.00154151
TIMM23B-AGAP6	0	1.75691	1.17765	14.3821	10.607	20.3584	13.3852	3.74257	0.000418859	0.00164419
CCDC107	0	1.75691	1.17765	17.2585	10.607	16.9654	13.3844	3.74248	0.000405545	0.00160304
MOB3C	0	3.51382	0	20.1349	15.9105	10.1792	13.3835	3.74238	0.000584451	0.00217505
MPST	7.00422	7.02764	7.06593	43.1462	42.4279	203.584	13.3707	3.741	9.44723e-09	1.69736e-07
ABT1	1.40084	0	3.53296	28.7642	5.30349	44.11	13.3493	3.7387	3.13369e-05	0.000180669
ID3	1.40084	3.51382	4.71062	86.2925	10.607	37.3238	13.3478	3.73853	8.4406e-07	8.14874e-06
PUSL1	1.40084	0	2.35531	5.75283	5.30349	50.8961	13.3414	3.73784	0.000620541	0.00229001
HLA-C	58.8355	43.9228	47.1062	316.406	535.653	1157.04	13.335	3.73714	4.52755e-15	3.68841e-13
FAM189B	4.20253	7.02764	2.35531	60.4047	37.1244	71.2546	13.2371	3.72652	2.64155e-09	5.47363e-08
TTC38	4.20253	0	0	14.3821	37.1244	20.3584	13.2359	3.72639	9.89158e-05	0.000482372
PGPEP1	8.40507	8.78455	5.88827	86.2925	121.98	108.578	13.2347	3.72625	1.3613e-12	6.55519e-11
SYNJ2BP	2.80169	3.51382	0	25.8877	47.7314	16.9654	13.162	3.7183	1.20817e-05	8.07753e-05
SCN8A	2.80169	0	0	34.517	10.607	0	13.1176	3.71344	0.00314962	0.00880265
PARP14	2.80169	10.5415	8.24358	80.5396	143.194	71.2546	12.9895	3.69927	1.2407e-11	4.61151e-10
SEC22C	4.20253	5.27073	3.53296	63.2811	47.7314	57.6823	12.9724	3.69737	1.21886e-09	2.83147e-08
SEC14L1	61.6372	65.0057	76.5476	868.678	1140.25	654.863	12.9252	3.69211	1.02438e-16	1.12815e-14
RAB3D	0	5.27073	4.71062	17.2585	90.1594	33.9307	12.8851	3.68763	2.12702e-06	1.78271e-05
NDUFA11	9.80591	10.5415	8.24358	92.0453	63.6419	213.764	12.8771	3.68673	1.17722e-11	4.41698e-10
TRAM2	36.422	29.8675	28.2637	316.406	684.15	230.729	12.8152	3.67978	8.20506e-16	7.80728e-14
ZNF841	0	3.51382	0	37.3934	10.607	0	12.7851	3.67639	0.00304444	0.00855435
BAMBI	1.40084	0	0	20.1349	5.30349	0	12.7583	3.67337	0.0120295	0.026814
CYBC1	2.80169	5.27073	10.5989	83.4161	47.7314	118.758	12.742	3.67152	1.46152e-10	4.09019e-09
GLB1	9.80591	10.5415	15.3095	120.809	175.015	186.619	12.7419	3.6715	4.9392e-17	5.87469e-15
MTRF1L	2.80169	3.51382	4.71062	57.5283	42.4279	47.503	12.6911	3.66574	5.54585e-09	1.05879e-07
MON1B	11.2068	14.0553	4.71062	161.079	106.07	95.0061	12.6412	3.66006	2.27417e-13	1.26397e-11
LDAF1	2.80169	1.75691	2.35531	31.6406	37.1244	30.5377	12.6232	3.658	1.06299e-06	9.90071e-06
TBC1D7	2.80169	1.75691	9.42124	89.1689	47.7314	57.6823	12.6182	3.65743	8.09616e-10	1.94537e-08
SRD5A3	1.40084	1.75691	2.35531	17.2585	37.1244	30.5377	12.5813	3.65321	1.3375e-05	8.79393e-05
PLSCR3	4.20253	10.5415	9.42124	77.6632	42.4279	186.619	12.5771	3.65273	1.91886e-09	4.18002e-08
TFEC	7.00422	7.02764	10.5989	120.809	180.319	23.7515	12.5612	3.6509	1.19511e-08	2.07817e-07
CCDC28A	2.80169	0	0	5.75283	21.214	20.3584	12.5131	3.64537	0.00102375	0.00349797
RABL2B	0	0	3.53296	14.3821	21.214	27.1446	12.507	3.64466	9.32694e-05	0.000458718
MCPH1	0	1.75691	2.35531	14.3821	26.5175	23.7515	12.5069	3.64466	7.70035e-05	0.000391635
OSBP2	1.40084	3.51382	0	14.3821	26.5175	23.7515	12.5045	3.64438	8.51115e-05	0.000425701
CCDC149	1.40084	0	2.35531	25.8877	10.607	20.3584	12.4999	3.64384	7.74148e-05	0.000393492
NDRG1	39.2236	29.8675	10.5989	428.586	249.264	305.377	12.4983	3.64366	1.16091e-14	8.85123e-13
SELENOH	2.80169	17.5691	18.8425	69.034	100.766	325.735	12.4545	3.6386	8.48444e-10	2.02638e-08
DUSP22	1.40084	3.51382	5.88827	43.1462	42.4279	61.0753	12.3951	3.6317	1.5535e-08	2.58424e-07
EFHC1	0	1.75691	1.17765	11.5057	21.214	13.5723	12.3764	3.62952	0.000615394	0.00227313
TGIF2	2.80169	0	0	11.5057	15.9105	16.9654	12.3749	3.62935	0.00062853	0.00230946
PRR13	14.0084	1.75691	8.24358	77.6632	53.0349	179.833	12.3724	3.62905	2.53791e-09	5.3196e-08
ANKRD42	0	3.51382	0	14.3821	10.607	16.9654	12.3709	3.62888	0.000655317	0.0023909
AAMDC	4.20253	0	7.06593	37.3934	31.8209	88.2199	12.3549	3.62701	1.83795e-07	2.18122e-06
DCBLD1	1.40084	5.27073	5.88827	43.1462	95.4628	33.9307	12.344	3.62573	6.98487e-08	9.53824e-07
PEX26	2.80169	1.75691	4.71062	46.0227	53.0349	33.9307	12.3399	3.62526	1.14333e-07	1.45286e-06
CCDC137	1.40084	3.51382	4.71062	37.3934	47.7314	47.503	12.3398	3.62525	9.94097e-08	1.2894e-06
TMEM170A	1.40084	3.51382	0	43.1462	10.607	6.78615	12.3384	3.62508	0.000408914	0.00161301
CAST	22.4135	19.326	12.9542	227.237	228.05	213.764	12.3305	3.62416	6.87436e-19	1.1368e-16
NLRP1	1.40084	3.51382	10.5989	80.5396	63.6419	67.8615	12.328	3.62387	1.82384e-10	5.03312e-09
ZNF700	0	1.75691	0	0	10.607	16.9654	12.3237	3.62336	0.0131892	0.0289012
MXD1	0	5.27073	0	51.7755	15.9105	0	12.3038	3.62103	0.00115375	0.00386011
PCDHGA12	0	0	1.17765	11.5057	15.9105	0	12.2764	3.61781	0.0121996	0.0271342
GUCD1	15.4093	5.27073	7.06593	132.315	90.1594	118.758	12.2626	3.61619	1.95182e-13	1.10548e-11
SNAPC2	5.60338	1.75691	1.17765	40.2698	21.214	44.11	12.2544	3.61522	5.76706e-07	5.91176e-06
RNF182	0	0	1.17765	5.75283	21.214	3.39307	12.2493	3.61462	0.00981637	0.0225981
HSPG2	266.16	435.714	518.168	5338.63	8018.88	1516.7	12.1793	3.60636	1.0522e-11	3.99836e-10
EGFL7	58.8355	52.7073	73.0146	330.788	355.334	1564.21	12.1415	3.60188	2.09769e-11	7.27402e-10
RPUSD1	2.80169	5.27073	5.88827	46.0227	37.1244	91.613	12.1228	3.59966	1.14319e-08	1.99079e-07
CYCS	1.40084	1.75691	4.71062	60.4047	5.30349	37.3238	12.1125	3.59842	7.69084e-06	5.49729e-05
TMEM42	1.40084	0	0	2.87642	5.30349	16.9654	12.1048	3.59751	0.0118689	0.0265155
NUDT15	1.40084	0	0	8.62925	15.9105	3.39307	12.0783	3.59435	0.00853829	0.0201458
CAMK2N1	1.40084	0	0	8.62925	15.9105	3.39307	12.0783	3.59435	0.00857741	0.0202099
ZNF316	1.40084	1.75691	5.88827	28.7642	26.5175	67.8615	12.0779	3.5943	6.76889e-07	6.78258e-06
ZNF669	1.40084	0	0	5.75283	10.607	10.1792	12.0776	3.59426	0.00818861	0.0194324
C1orf109	0	0	1.17765	8.62925	10.607	6.78615	12.0776	3.59426	0.00790139	0.0189017
ZNF674	0	0	1.17765	8.62925	10.607	6.78615	12.0776	3.59426	0.00796272	0.0190063
MLYCD	0	0	1.17765	8.62925	5.30349	10.1792	12.076	3.59407	0.00811481	0.0192997
ZNF784	1.40084	0	0	8.62925	5.30349	10.1792	12.0752	3.59398	0.0081481	0.0193556
FXN	1.40084	0	0	8.62925	5.30349	10.1792	12.0752	3.59398	0.00816419	0.0193836
XYLB	0	1.75691	0	5.75283	5.30349	13.5723	12.0752	3.59397	0.00943775	0.0218518
MAGEF1	0	1.75691	0	11.5057	5.30349	6.78615	12.0737	3.59379	0.00864119	0.020324
C6orf47	1.40084	0	3.53296	17.2585	15.9105	40.7169	12.0615	3.59234	3.99304e-05	0.000222659
TOLLIP	19.6118	15.8122	15.3095	192.72	153.801	261.267	12.0469	3.59059	2.11874e-16	2.19133e-14
FHL2	11.2068	12.2984	20.0201	126.562	175.015	244.301	12.038	3.58952	1.38556e-15	1.24848e-13
RSRP1	11.2068	7.02764	7.06593	89.1689	153.801	84.8268	12.0303	3.5886	1.07899e-11	4.08709e-10
METTL23	2.80169	1.75691	3.53296	20.1349	31.8209	57.6823	12.0201	3.58738	2.11157e-06	1.77116e-05
NDUFC1	2.80169	1.75691	4.71062	28.7642	42.4279	57.6823	12.0141	3.58666	1.98494e-07	2.326e-06
GPATCH3	1.40084	0	3.53296	17.2585	26.5175	33.9307	12.0135	3.58659	2.66838e-05	0.000157507
NIFK	0	3.51382	2.35531	23.0113	37.1244	20.3584	12.0127	3.58649	2.22437e-05	0.000134947
UNKL	4.20253	7.02764	2.35531	80.5396	42.4279	33.9307	11.9658	3.58085	4.75692e-08	6.79217e-07
FAM219B	2.80169	1.75691	11.7765	46.0227	90.1594	88.2199	11.961	3.58026	1.53533e-09	3.47172e-08
gene:ENSG00000284976	0	3.51382	0	14.3821	0	27.1446	11.945	3.57834	0.00186214	0.00570685
MRPS16	4.20253	7.02764	5.88827	57.5283	42.4279	105.185	11.9394	3.57765	6.53345e-10	1.62231e-08
PPP1R15A	30.8186	15.8122	27.0861	414.204	217.443	257.874	11.9013	3.57305	2.37345e-16	2.4128e-14
MAFF	25.2152	7.02764	7.06593	138.068	169.712	173.047	11.886	3.5712	1.4986e-14	1.11402e-12
NFATC2IP	1.40084	5.27073	2.35531	31.6406	37.1244	40.7169	11.8677	3.56897	4.95035e-07	5.20597e-06
SC5D	2.80169	5.27073	1.17765	43.1462	42.4279	23.7515	11.8655	3.5687	8.5868e-07	8.25822e-06
STXBP2	1.40084	7.02764	8.24358	57.5283	47.7314	98.3991	11.8506	3.56689	7.4825e-10	1.81749e-08
LIME1	0	1.75691	0	5.75283	0	16.9654	11.8016	3.56092	0.013477	0.0294256
CCDC82	5.60338	3.51382	3.53296	43.1462	106.07	13.5723	11.7875	3.55919	8.85841e-07	8.47643e-06
SHLD2	2.80169	0	1.17765	14.3821	15.9105	27.1446	11.7776	3.55797	0.000175558	0.000790421
INIP	0	0	3.53296	28.7642	10.607	13.5723	11.73	3.55213	0.000317661	0.00130105
COX7A2	8.40507	10.5415	5.88827	77.6632	84.8559	125.544	11.728	3.55188	9.15351e-12	3.56957e-10
AGTRAP	1.40084	0	2.35531	11.5057	5.30349	37.3238	11.6991	3.54833	0.000553464	0.00208039
MZF1	1.40084	3.51382	2.35531	28.7642	31.8209	30.5377	11.6941	3.5477	2.05363e-06	1.7311e-05
TMEM50A	11.2068	3.51382	4.71062	71.9104	79.5524	88.2199	11.6934	3.54762	7.45065e-11	2.2435e-09
SLC19A1	4.20253	3.51382	0	28.7642	31.8209	30.5377	11.6926	3.54752	3.38157e-06	2.69213e-05
LRPAP1	18.211	26.3537	10.5989	163.956	106.07	366.452	11.6829	3.54633	3.75902e-12	1.5911e-10
COMT	9.80591	19.326	9.42124	106.427	116.677	217.157	11.6549	3.54287	3.67432e-13	1.98647e-11
STIMATE	8.40507	0	1.17765	43.1462	26.5175	47.503	11.6504	3.54231	6.63333e-07	6.67486e-06
FAAP100	2.80169	7.02764	7.06593	48.8991	68.9454	88.2199	11.5555	3.53051	2.44136e-10	6.53999e-09
FRY	2.80169	0	2.35531	23.0113	31.8209	20.3584	11.4466	3.51685	3.06876e-05	0.000177635
NECAB3	4.20253	1.75691	0	25.8877	15.9105	27.1446	11.4393	3.51593	4.31804e-05	0.000238103
MIEF2	4.20253	1.75691	0	28.7642	10.607	27.1446	11.4371	3.51565	6.1193e-05	0.000322191
NRGN	5.60338	1.75691	5.88827	25.8877	5.30349	128.937	11.4078	3.51195	1.58856e-05	0.000101039
CERK	15.4093	14.0553	20.0201	221.484	159.105	186.619	11.3811	3.50857	7.62283e-17	8.71788e-15
TYRO3	7.00422	5.27073	1.17765	46.0227	63.6419	47.503	11.3654	3.50658	2.16588e-08	3.41658e-07
NMNAT1	0	1.75691	1.17765	8.62925	15.9105	16.9654	11.3626	3.50623	0.000945341	0.00327619
XKR8	1.40084	0	1.17765	14.3821	15.9105	10.1792	11.362	3.50614	0.000817044	0.00288966
DNAH1	0	1.75691	1.17765	17.2585	15.9105	6.78615	11.3605	3.50595	0.00104021	0.00354404
EXOG	1.40084	0	1.17765	17.2585	10.607	10.1792	11.3598	3.50587	0.000894279	0.00312932
CACNG8	0	1.75691	1.17765	17.2585	0	16.9654	11.3561	3.5054	0.00147945	0.0047379
BACE2	11.2068	15.8122	16.4872	169.709	206.836	139.116	11.3392	3.50325	3.63722e-17	4.60225e-15
TBC1D16	4.20253	8.78455	12.9542	106.427	121.98	88.2199	11.3327	3.50242	1.37474e-11	4.97655e-10
MRPS35	4.20253	1.75691	3.53296	40.2698	26.5175	47.503	11.3113	3.4997	1.56599e-07	1.89672e-06
FDXR	2.80169	5.27073	11.7765	31.6406	37.1244	166.261	11.297	3.49786	4.01037e-07	4.32246e-06
METRNL	12.6076	7.02764	7.06593	74.7868	79.5524	152.688	11.2771	3.49532	9.9721e-11	2.89995e-09
VAMP3	21.0127	12.2984	10.5989	155.326	164.408	179.833	11.248	3.4916	4.73047e-17	5.68325e-15
MAPK13	4.20253	0	2.35531	20.1349	26.5175	40.7169	11.2326	3.48962	9.20431e-06	6.40441e-05
DNAJC30	2.80169	0	0	5.75283	5.30349	27.1446	11.2018	3.48565	0.00268122	0.00773289
ZKSCAN1	7.00422	3.51382	9.42124	94.9217	121.98	23.7515	11.1938	3.48462	3.07072e-08	4.6467e-07
TCOF1	4.20253	7.02764	4.71062	40.2698	53.0349	88.2199	11.1887	3.48397	6.38443e-09	1.19774e-07
UBASH3B	1.40084	1.75691	0	28.7642	5.30349	3.39307	11.176	3.48233	0.00285558	0.00812932
EOLA1	0	0	5.88827	17.2585	15.9105	47.503	11.171	3.48168	7.16693e-05	0.00036854
IFI27L1	1.40084	0	1.17765	11.5057	0	23.7515	11.1675	3.48124	0.00206391	0.00622735
MBD1	15.4093	12.2984	7.06593	189.843	95.4628	95.0061	11.126	3.47587	1.38038e-12	6.62027e-11
CSRNP2	1.40084	5.27073	5.88827	57.5283	63.6419	30.5377	11.1004	3.47254	5.80926e-08	8.07897e-07
LAMA4	88.2532	73.7902	93.0347	730.61	1315.27	817.731	11.0623	3.46758	9.03034e-15	7.06624e-13
NTPCR	1.40084	0	2.35531	14.3821	10.607	27.1446	11.0506	3.46606	0.000375396	0.00149881
BAD	15.4093	1.75691	8.24358	57.5283	31.8209	200.191	11.0046	3.46003	2.87566e-07	3.22671e-06
HOMER3	39.2236	22.8398	28.2637	149.574	206.836	644.684	10.99	3.45812	4.43145e-11	1.42453e-09
TGFBI	9.80591	5.27073	4.71062	86.2925	68.9454	64.4684	10.9802	3.45683	1.14383e-10	3.27825e-09
LDLRAP1	5.60338	1.75691	7.06593	63.2811	42.4279	64.4684	10.9472	3.45249	3.68281e-09	7.3743e-08
VEGFB	16.8101	17.5691	15.3095	115.057	84.8559	346.094	10.9455	3.45226	3.22661e-11	1.08717e-09
TMC7	0	1.75691	1.17765	2.87642	26.5175	13.5723	10.9427	3.4519	0.00250176	0.00731463
LYSMD3	2.80169	1.75691	2.35531	63.2811	10.607	6.78615	10.9299	3.45021	0.00014778	0.000685795
FGF2	0	1.75691	0	17.2585	0	3.39307	10.9108	3.44768	0.0189958	0.0389814
IRGQ	5.60338	1.75691	3.53296	43.1462	26.5175	54.2892	10.8868	3.44451	2.89078e-07	3.24062e-06
DMAC2	4.20253	5.27073	3.53296	48.8991	15.9105	74.6476	10.8848	3.44424	2.07101e-07	2.41496e-06
RHBDD3	0	1.75691	2.35531	8.62925	5.30349	37.3238	10.8822	3.4439	0.00120942	0.00400469
GATA3	2.80169	0	2.35531	20.1349	31.8209	20.3584	10.8811	3.44376	5.2219e-05	0.000282315
FNDC4	5.60338	8.78455	12.9542	109.304	37.1244	156.081	10.8763	3.44311	2.15709e-09	4.62278e-08
NINJ1	11.2068	8.78455	12.9542	74.7868	63.6419	227.336	10.8603	3.44099	4.63869e-10	1.18907e-08
PDLIM4	8.40507	7.02764	5.88827	63.2811	21.214	149.295	10.8592	3.44085	7.11407e-08	9.68132e-07
MGST1	7.00422	7.02764	10.5989	100.675	68.9454	101.792	10.8233	3.43607	4.72004e-12	1.96983e-10
METTL17	1.40084	3.51382	2.35531	28.7642	15.9105	33.9307	10.7625	3.42794	8.20598e-06	5.80964e-05
ELMOD3	2.80169	5.27073	0	17.2585	26.5175	40.7169	10.7439	3.42545	1.86985e-05	0.000116075
ARL16	4.20253	3.51382	3.53296	20.1349	21.214	84.8268	10.725	3.42291	5.68628e-06	4.22176e-05
CCL2	11.2068	0	4.71062	14.3821	116.677	54.2892	10.7209	3.42236	4.9522e-06	3.74453e-05
TMEM192	1.40084	8.78455	1.17765	28.7642	74.2489	20.3584	10.6934	3.41865	5.9028e-06	4.34983e-05
SH3BP5L	9.80591	3.51382	2.35531	74.7868	15.9105	78.0407	10.6832	3.41727	1.76016e-07	2.10194e-06
ZP3	0	1.75691	0	0	10.607	13.5723	10.6511	3.41293	0.0178014	0.0370351
SECISBP2	2.80169	1.75691	4.71062	34.517	58.3384	27.1446	10.6404	3.41148	6.8347e-07	6.83126e-06
ITGA1	5.60338	1.75691	3.53296	11.5057	95.4628	23.7515	10.6284	3.40985	2.10925e-05	0.000128719
TTYH3	29.4177	43.9228	68.304	635.688	445.493	441.1	10.6171	3.40831	2.4944e-16	2.51427e-14
INKA2	15.4093	7.02764	2.35531	89.1689	90.1594	81.4338	10.5665	3.40142	7.44195e-11	2.2435e-09
UBL5	8.40507	12.2984	16.4872	83.4161	26.5175	288.411	10.5564	3.40005	9.59326e-08	1.25249e-06
LYL1	2.80169	8.78455	7.06593	31.6406	31.8209	135.723	10.5109	3.39382	2.5175e-07	2.86812e-06
NDUFV3	2.80169	1.75691	3.53296	14.3821	26.5175	54.2892	10.4901	3.39096	1.66608e-05	0.000105239
RESF1	4.20253	5.27073	3.53296	17.2585	116.677	13.5723	10.4827	3.38994	2.58461e-05	0.00015363
ZNF28	0	1.75691	0	8.62925	15.9105	0	10.4625	3.38716	0.0179585	0.0373033
TNFRSF1A	28.0169	22.8398	20.0201	198.473	217.443	325.735	10.447	3.38502	1.46117e-18	2.25703e-16
STOM	16.8101	17.5691	10.5989	138.068	169.712	162.868	10.4375	3.38371	2.64742e-16	2.64608e-14
SSH1	14.0084	22.8398	20.0201	195.596	296.996	111.971	10.4086	3.37971	3.44024e-13	1.86841e-11
SMIM27	0	0	1.17765	2.87642	10.607	10.1792	10.4053	3.37925	0.014715	0.0314597
ATP6V0A4	0	1.75691	0	5.75283	15.9105	3.39307	10.4046	3.37915	0.0147002	0.0314412
CXCL1	1.40084	0	0	5.75283	10.607	6.78615	10.404	3.37907	0.0123478	0.0274155
ZNF780B	0	0	1.17765	8.62925	10.607	3.39307	10.404	3.37907	0.0137995	0.0299525
MYO5B	0	0	1.17765	2.87642	5.30349	13.5723	10.404	3.37907	0.0162151	0.034153
KBTBD6	1.40084	0	0	8.62925	10.607	3.39307	10.4033	3.37897	0.013057	0.0286584
C1orf131	0	0	1.17765	5.75283	5.30349	10.1792	10.4033	3.37897	0.0131251	0.0287814
RNF122	0	0	1.17765	8.62925	5.30349	6.78615	10.4027	3.37888	0.0128466	0.0282959
SLC12A8	0	0	1.17765	11.5057	5.30349	3.39307	10.402	3.37879	0.014908	0.0318055
NEK10	1.40084	0	0	11.5057	5.30349	3.39307	10.4013	3.3787	0.0150325	0.0319939
LAT	0	0	1.17765	8.62925	0	10.1792	10.4013	3.3787	0.0149658	0.0319029
PALB2	0	1.75691	0	11.5057	5.30349	3.39307	10.4006	3.3786	0.0143542	0.0309011
LETM2	1.40084	0	0	11.5057	0	6.78615	10.4	3.37851	0.0161086	0.0339769
CREBL2	4.20253	1.75691	2.35531	43.1462	42.4279	10.1792	10.3618	3.3732	1.57214e-05	0.000100102
POLR2J	8.40507	1.75691	4.71062	40.2698	15.9105	105.185	10.3611	3.3731	1.34483e-06	1.20629e-05
NDUFS6	8.40507	7.02764	14.1319	57.5283	47.7314	210.371	10.3574	3.37259	2.83293e-08	4.34772e-07
ZNF121	0	1.75691	1.17765	5.75283	21.214	13.5723	10.3516	3.37179	0.00213189	0.00638708
MFSD3	1.40084	1.75691	0	8.62925	10.607	16.9654	10.3477	3.37124	0.00184122	0.00565292
TAGLN	2.80169	0	0	17.2585	10.607	6.78615	10.3464	3.37106	0.00232121	0.00685754
MUTYH	2.80169	0	0	11.5057	5.30349	16.9654	10.3464	3.37106	0.00223038	0.00663038
CDC42EP5	5.60338	5.27073	2.35531	25.8877	10.607	101.792	10.3104	3.36603	8.53696e-06	5.99402e-05
OGFOD3	2.80169	1.75691	1.17765	25.8877	5.30349	27.1446	10.3057	3.36537	0.000124639	0.000588509
CALHM5	1.40084	1.75691	2.35531	31.6406	5.30349	20.3584	10.3051	3.36528	0.000142012	0.00066161
TMCC3	1.40084	3.51382	4.71062	40.2698	53.0349	20.3584	10.2963	3.36405	1.60478e-06	1.40039e-05
ENGASE	7.00422	1.75691	0	28.7642	31.8209	33.9307	10.2962	3.36405	8.07381e-06	5.72288e-05
TCF15	0	1.75691	0	0	5.30349	16.9654	10.2911	3.36332	0.0231313	0.045641
NOL8	1.40084	5.27073	2.35531	34.517	10.607	40.7169	10.2896	3.36312	1.05122e-05	7.16103e-05
ZNF124	1.40084	0	1.17765	20.1349	10.607	3.39307	10.2881	3.36291	0.00291892	0.00827398
GLA	8.40507	7.02764	11.7765	106.427	58.3384	115.365	10.2652	3.35969	5.24235e-11	1.67165e-09
ZNF217	1.40084	3.51382	1.17765	40.2698	21.214	3.39307	10.2521	3.35785	0.000413839	0.00162879
SLC3A2	72.8439	47.4366	68.304	880.183	403.065	648.077	10.2099	3.3519	3.0577e-15	2.54323e-13
GIMAP1-GIMAP5	1.40084	3.51382	0	2.87642	15.9105	33.9307	10.2047	3.35116	0.0018591	0.00569899
TBC1D8	18.211	14.0553	9.42124	123.686	206.836	108.578	10.202	3.35078	5.41147e-13	2.79844e-11
RPL6	107.865	103.658	88.3241	693.216	567.474	1791.54	10.1816	3.34789	1.30486e-11	4.81988e-10
FAM89B	21.0127	5.27073	9.42124	80.5396	31.8209	257.874	10.1793	3.34756	1.5115e-07	1.83634e-06
PCNT	7.00422	7.02764	4.71062	71.9104	90.1594	37.3238	10.1623	3.34515	2.85986e-09	5.90542e-08
TSPAN17	12.6076	7.02764	11.7765	117.933	90.1594	118.758	10.1596	3.34477	5.09157e-13	2.68708e-11
TMEM171	4.20253	1.75691	1.17765	11.5057	42.4279	30.5377	10.1557	3.34422	5.24466e-05	0.000283112
SERPIND1	1.40084	0	0	2.87642	0	16.9654	10.1437	3.34251	0.0237815	0.0466837
NQO2	1.40084	7.02764	2.35531	46.0227	5.30349	54.2892	10.1362	3.34144	9.34275e-06	6.47568e-05
DGCR6L	9.80591	3.51382	3.53296	11.5057	37.1244	128.937	10.1315	3.34078	1.0238e-05	7.01447e-05
MTUS1	11.2068	17.5691	16.4872	80.5396	254.568	139.116	10.1293	3.34047	3.36852e-12	1.4464e-10
GRIN2D	0	0	1.17765	14.3821	0	3.39307	10.0888	3.33468	0.0220322	0.0438508
MRPL51	7.00422	10.5415	5.88827	57.5283	53.0349	122.151	10.0773	3.33303	3.09668e-09	6.34897e-08
YIPF2	8.40507	1.75691	8.24358	60.4047	42.4279	95.0061	10.0719	3.33226	2.2513e-09	4.7816e-08
ZSCAN2	0	0	3.53296	5.75283	15.9105	27.1446	10.05	3.32912	0.00156205	0.00494913
CYB561	14.0084	14.0553	4.71062	106.427	100.766	108.578	10.04	3.32769	1.34335e-11	4.90117e-10
JCAD	12.6076	19.326	21.1978	77.6632	328.816	139.116	9.96351	3.31665	5.7479e-11	1.80229e-09
NDUFB10	15.4093	8.78455	14.1319	63.2811	90.1594	237.515	9.94935	3.3146	6.66162e-10	1.64044e-08
OCIAD2	4.20253	7.02764	8.24358	69.034	21.214	105.185	9.94849	3.31448	3.25962e-08	4.88286e-07
C14orf119	5.60338	14.0553	9.42124	74.7868	74.2489	135.723	9.92842	3.31156	2.91765e-10	7.69457e-09
RBM48	1.40084	3.51382	3.53296	23.0113	21.214	44.11	9.90347	3.30793	7.46385e-06	5.34789e-05
SDHAF2	7.00422	3.51382	20.0201	74.7868	63.6419	179.833	9.89422	3.30659	1.3976e-08	2.36124e-07
TP53I13	0	5.27073	3.53296	25.8877	15.9105	44.11	9.88733	3.30558	1.31253e-05	8.67289e-05
CHCHD1	4.20253	7.02764	1.17765	14.3821	26.5175	81.4338	9.85847	3.30136	1.59597e-05	0.000101402
HAUS1	1.40084	1.75691	2.35531	8.62925	15.9105	37.3238	9.85039	3.30018	0.000258319	0.00109927
gene:ENSG00000255439	0	1.75691	0	14.3821	5.30349	0	9.84724	3.29972	0.0229353	0.0453444
CEBPZOS	1.40084	5.27073	1.17765	20.1349	26.5175	30.5377	9.8385	3.29844	2.84218e-05	0.000166363
ZNF629	2.80169	3.51382	1.17765	23.0113	15.9105	33.9307	9.83605	3.29808	2.99584e-05	0.000174072
TBL2	1.40084	5.27073	8.24358	80.5396	42.4279	30.5377	9.8344	3.29784	3.92216e-07	4.24479e-06
MXD4	28.0169	14.0553	24.7307	169.709	185.622	315.556	9.79692	3.29233	1.07772e-14	8.2699e-13
PLSCR4	1.40084	1.75691	3.53296	23.0113	47.7314	10.1792	9.79314	3.29177	9.59247e-05	0.000470292
RALA	39.2236	49.1935	42.3956	319.282	487.921	485.21	9.79057	3.29139	2.70463e-16	2.68074e-14
PDXK	15.4093	5.27073	9.42124	146.697	63.6419	88.2199	9.78511	3.29059	3.46218e-10	9.09032e-09
TPCN2	1.40084	3.51382	1.17765	14.3821	37.1244	16.9654	9.74924	3.28529	0.000157172	0.000721776
KHNYN	12.6076	8.78455	7.06593	115.057	106.07	61.0753	9.74331	3.28441	2.05393e-10	5.59026e-09
CCZ1	1.40084	12.2984	11.7765	28.7642	111.373	115.365	9.71066	3.27957	1.93291e-07	2.27849e-06
DRP2	1.40084	0	1.17765	23.0113	0	6.78615	9.7021	3.2783	0.00564516	0.0143102
RNH1	32.2194	21.0829	34.152	293.394	106.07	454.672	9.69981	3.27796	1.18218e-11	4.42165e-10
COL4A5	12.6076	8.78455	3.53296	106.427	95.4628	40.7169	9.66865	3.27332	8.01947e-09	1.46744e-07
CORO7	1.40084	1.75691	9.42124	25.8877	26.5175	81.4338	9.64524	3.26982	6.14438e-06	4.50285e-05
ZC3HAV1	4.20253	14.0553	9.42124	89.1689	100.766	78.0407	9.6192	3.26592	3.34813e-11	1.11548e-09
LYRM4	2.80169	3.51382	3.53296	25.8877	21.214	50.8961	9.60226	3.26337	4.63576e-06	3.54355e-05
ARSG	2.80169	0	1.17765	23.0113	10.607	10.1792	9.5958	3.2624	0.00092929	0.00322809
CRACR2B	2.80169	3.51382	2.35531	5.75283	21.214	61.0753	9.57119	3.2587	0.000141639	0.000660391
PARP4	15.4093	14.0553	16.4872	172.585	180.319	101.792	9.56145	3.25723	2.00695e-14	1.45553e-12
SIVA1	2.80169	7.02764	0	14.3821	10.607	67.8615	9.55896	3.25685	0.000193514	0.00086172
GPR161	4.20253	3.51382	5.88827	46.0227	63.6419	37.3238	9.55853	3.25679	4.80465e-08	6.8521e-07
TTL	11.2068	8.78455	15.3095	129.439	148.498	84.8268	9.55513	3.25628	2.4172e-12	1.08083e-10
PPIF	5.60338	3.51382	4.71062	54.6519	31.8209	47.503	9.54887	3.25533	5.76948e-08	8.0448e-07
GRN	110.667	94.8731	146.029	647.194	864.469	1856.01	9.54027	3.25403	9.38877e-12	3.62565e-10
ADI1	2.80169	12.2984	17.6648	66.1576	74.2489	179.833	9.53353	3.25301	1.45733e-08	2.43448e-07
RBMX2	0	7.02764	2.35531	34.517	37.1244	16.9654	9.51009	3.24946	1.96242e-05	0.000120938
DPH7	1.40084	3.51382	3.53296	28.7642	0	54.2892	9.48415	3.24552	0.000129071	0.000607028
SLC1A5	15.4093	10.5415	16.4872	276.136	90.1594	40.7169	9.45785	3.24151	3.28093e-08	4.9086e-07
MBD3	14.0084	17.5691	18.8425	117.933	42.4279	318.949	9.45377	3.24089	4.38265e-09	8.57355e-08
GSTM3	9.80591	3.51382	5.88827	31.6406	42.4279	115.365	9.45155	3.24055	2.75375e-07	3.10455e-06
UNC119	7.00422	8.78455	2.35531	60.4047	21.214	81.4338	9.45058	3.2404	2.25804e-07	2.61003e-06
MT-CO1	1136.08	716.819	663.02	8856.48	8761.37	6151.64	9.44343	3.23931	4.27937e-13	2.28246e-11
GLIPR1	0	7.02764	2.35531	40.2698	21.214	20.3584	9.42159	3.23597	2.19458e-05	0.000133516
RPL13A	256.355	226.641	243.775	1397.94	864.469	4587.44	9.42064	3.23583	1.54717e-09	3.49185e-08
ZDHHC24	11.2068	3.51382	8.24358	54.6519	37.1244	132.33	9.41654	3.2352	5.46108e-08	7.67779e-07
HYI	5.60338	1.75691	3.53296	11.5057	15.9105	81.4338	9.3669	3.22757	6.17443e-05	0.000324806
TBC1D2B	12.6076	8.78455	18.8425	94.9217	164.408	149.295	9.35891	3.22634	2.64324e-12	1.16872e-10
RSL1D1	9.80591	8.78455	8.24358	74.7868	84.8559	98.3991	9.35716	3.22607	8.27655e-12	3.27047e-10
GOLGA3	18.211	21.0829	18.8425	253.125	169.712	118.758	9.34137	3.22363	1.00749e-13	6.17683e-12
MOCS3	0	0	2.35531	11.5057	10.607	10.1792	9.33609	3.22282	0.00303376	0.00853242
CRYZ	0	0	2.35531	14.3821	10.607	6.78615	9.3355	3.22273	0.00349002	0.00959332
FTL	1283.17	1370.39	1843.03	7915.9	7493.83	26506.7	9.32033	3.22038	2.52231e-10	6.72655e-09
IFI27L2	5.60338	3.51382	3.53296	28.7642	10.607	81.4338	9.30867	3.21857	1.37245e-05	8.9692e-05
KCTD21	4.20253	1.75691	7.06593	57.5283	31.8209	40.7169	9.30663	3.21826	1.92476e-07	2.27114e-06
REXO4	4.20253	3.51382	8.24358	40.2698	47.7314	74.6476	9.28982	3.21565	7.27063e-08	9.86053e-07
FAM107B	18.211	14.0553	7.06593	152.45	132.587	78.0407	9.28287	3.21457	2.65028e-11	9.05819e-10
THEM6	0	1.75691	2.35531	14.3821	0	27.1446	9.28203	3.21444	0.00220356	0.00656212
LBHD1	4.20253	1.75691	0	23.0113	0	33.9307	9.27912	3.21399	0.000782185	0.00277711
PHLDB1	11.2068	29.8675	30.619	218.608	196.229	247.694	9.26863	3.21236	1.00006e-14	7.72385e-13
ATP8B1	8.40507	0	3.53296	25.8877	84.8559	13.5723	9.25744	3.21061	3.77534e-05	0.000211613
BRI3	35.0211	28.1106	44.7509	189.843	148.498	661.649	9.20284	3.20208	1.08564e-09	2.54365e-08
PODXL	77.0464	70.2764	75.3699	952.094	535.653	553.071	9.18452	3.1992	3.29827e-14	2.28079e-12
MANBA	0	1.75691	3.53296	14.3821	15.9105	27.1446	9.1801	3.19851	0.000204833	0.000903668
ZNF791	1.40084	1.75691	2.35531	25.8877	26.5175	6.78615	9.17959	3.19843	0.000265234	0.00112347
SOBP	1.40084	1.75691	2.35531	23.0113	5.30349	23.7515	9.17544	3.19778	0.000222573	0.000968989
ST6GALNAC6	5.60338	7.02764	3.53296	46.0227	26.5175	67.8615	9.16433	3.19603	1.51667e-07	1.84075e-06
ENG	130.279	108.928	163.694	940.588	1044.79	1727.07	9.16255	3.19575	1.50506e-12	7.16049e-11
JAG2	33.6203	19.326	25.9084	163.956	212.14	356.273	9.13932	3.19209	4.35847e-15	3.57515e-13
MRS2	4.20253	1.75691	2.35531	17.2585	37.1244	33.9307	9.12271	3.18946	1.85945e-05	0.00011549
PRORP	4.20253	0	3.53296	37.3934	26.5175	16.9654	9.11756	3.18865	2.21943e-05	0.000134752
MBD4	1.40084	3.51382	3.53296	37.3934	21.214	20.3584	9.11516	3.18827	1.52995e-05	9.79398e-05
DAPK3	19.6118	17.5691	15.3095	129.439	121.98	223.943	9.08586	3.18362	5.2918e-14	3.47738e-12
ATP1B3	60.2363	49.1935	27.0861	302.024	434.886	495.389	9.05369	3.17851	2.17084e-14	1.5606e-12
ZNF3	0	3.51382	4.71062	46.0227	10.607	20.3584	9.046	3.17728	8.60195e-05	0.000429159
PSD3	2.80169	1.75691	2.35531	28.7642	42.4279	0	9.0402	3.17636	0.000775376	0.002759
ITGB1BP1	9.80591	14.0553	7.06593	74.7868	74.2489	122.151	9.0381	3.17602	1.15964e-10	3.31556e-09
AOPEP	1.40084	1.75691	2.35531	8.62925	5.30349	40.7169	9.02647	3.17416	0.000894603	0.00312953
EMCN	22.4135	19.326	15.3095	77.6632	243.961	203.584	9.00847	3.17128	5.97932e-12	2.46798e-10
AKIP1	1.40084	8.78455	0	23.0113	5.30349	61.0753	8.97629	3.16612	0.000328003	0.00133788
CCN2	320.793	66.7626	114.233	655.823	2731.3	1126.5	8.96629	3.16451	5.51023e-08	7.73774e-07
IGHMBP2	2.80169	3.51382	5.88827	37.3934	31.8209	47.503	8.94043	3.16034	4.17667e-07	4.47947e-06
CAPRIN2	2.80169	0	5.88827	34.517	42.4279	20.3584	8.93401	3.15931	1.43354e-05	9.27162e-05
TSKU	4.20253	3.51382	2.35531	40.2698	15.9105	30.5377	8.92431	3.15774	7.99874e-06	5.67966e-05
ARHGEF37	1.40084	0	4.71062	17.2585	31.8209	23.7515	8.91632	3.15645	0.000114394	0.000545769
ITGA10	1.40084	1.75691	3.53296	17.2585	31.8209	23.7515	8.91515	3.15626	7.62121e-05	0.000388289
HINT3	1.40084	3.51382	2.35531	28.7642	15.9105	20.3584	8.90833	3.15515	8.06988e-05	0.000407572
NFKBIE	4.20253	0	2.35531	28.7642	5.30349	27.1446	8.90727	3.15498	0.000203118	0.000897433
CMC2	1.40084	3.51382	2.35531	14.3821	15.9105	37.3238	8.90391	3.15444	0.000150618	0.000697608
MCRIP1	18.211	22.8398	11.7765	92.0453	53.0349	322.342	8.87652	3.14999	1.39268e-08	2.35626e-07
C1orf50	2.80169	0	1.17765	11.5057	10.607	20.3584	8.87203	3.14926	0.00101561	0.00347606
KIAA0895L	0	0	3.53296	20.1349	5.30349	13.5723	8.87033	3.14899	0.00152241	0.00484599
KLF12	0	3.51382	1.17765	20.1349	15.9105	6.78615	8.87027	3.14898	0.00139847	0.00450648
NPDC1	43.4262	36.8951	15.3095	178.338	137.891	529.32	8.86741	3.14851	7.37158e-10	1.79667e-08
SLC39A14	15.4093	10.5415	14.1319	307.776	37.1244	13.5723	8.84565	3.14497	1.9019e-05	0.000117941
GPX1	131.679	108.928	151.917	721.98	509.135	2246.21	8.84468	3.14481	1.38756e-09	3.15557e-08
SLC41A3	9.80591	1.75691	2.35531	34.517	37.1244	57.6823	8.82391	3.14142	1.50397e-06	1.32702e-05
KLF16	7.00422	5.27073	2.35531	46.0227	26.5175	50.8961	8.81729	3.14034	5.8242e-07	5.94206e-06
KCNJ2	2.80169	5.27073	3.53296	34.517	58.3384	20.3584	8.80383	3.13813	3.71221e-06	2.9221e-05
LAGE3	1.40084	1.75691	3.53296	5.75283	21.214	40.7169	8.79346	3.13643	0.000476808	0.00183711
ACAA2	2.80169	7.02764	7.06593	46.0227	21.214	81.4338	8.79018	3.13589	7.55337e-07	7.42109e-06
ZFYVE21	8.40507	1.75691	7.06593	28.7642	42.4279	91.613	8.7893	3.13575	8.47506e-07	8.16875e-06
MRPL30	2.80169	1.75691	5.88827	37.3934	15.9105	44.11	8.78274	3.13467	5.09366e-06	3.83929e-05
RILP	0	1.75691	4.71062	17.2585	5.30349	40.7169	8.78222	3.13459	0.000539807	0.00203695
TST	0	7.02764	4.71062	8.62925	15.9105	81.4338	8.75919	3.1308	0.000239189	0.00103076
FADD	8.40507	5.27073	4.71062	69.034	31.8209	54.2892	8.75509	3.13012	4.11989e-08	5.98416e-07
CCNQ	1.40084	1.75691	4.71062	20.1349	0	54.2892	8.73868	3.12742	0.000391896	0.00155425
FRAT1	1.40084	0	0	2.87642	10.607	6.78615	8.73099	3.12614	0.0239675	0.0470023
ZNF671	0	0	1.17765	5.75283	10.607	3.39307	8.73099	3.12614	0.0219539	0.0437206
FAM71F2	1.40084	0	0	5.75283	10.607	3.39307	8.73043	3.12605	0.0233698	0.0460275
HOMEZ	0	0	1.17765	2.87642	5.30349	10.1792	8.73043	3.12605	0.0221602	0.0440391
TTC39A	1.40084	0	0	2.87642	5.30349	10.1792	8.72987	3.12596	0.0224881	0.0445491
TLCD2	0	0	1.17765	5.75283	5.30349	6.78615	8.72987	3.12596	0.0188779	0.0388063
DPF3	0	1.75691	0	5.75283	10.607	3.39307	8.72984	3.12596	0.023946	0.0469756
RCAN3	1.40084	0	0	5.75283	5.30349	6.78615	8.72932	3.12587	0.0190985	0.0391246
LRRC4	1.40084	0	0	5.75283	5.30349	6.78615	8.72932	3.12587	0.0193536	0.0395927
MPZL3	0	1.75691	0	2.87642	5.30349	10.1792	8.72928	3.12586	0.0248913	0.0483991
FAM104B	0	1.75691	0	2.87642	5.30349	10.1792	8.72928	3.12586	0.0248899	0.0483991
ASGR1	1.40084	0	0	8.62925	5.30349	3.39307	8.72876	3.12578	0.021184	0.0424465
CLTCL1	1.40084	0	0	8.62925	5.30349	3.39307	8.72876	3.12578	0.0214469	0.0428938
ZNF101	0	0	1.17765	5.75283	0	10.1792	8.72876	3.12578	0.0235077	0.046236
MFSD9	1.40084	0	0	5.75283	0	10.1792	8.7282	3.12568	0.0231256	0.0456373
TMEM79	1.40084	0	0	5.75283	0	10.1792	8.7282	3.12568	0.0232338	0.0457824
ZNF568	0	1.75691	0	8.62925	5.30349	3.39307	8.72817	3.12568	0.0234914	0.0462271
ZNF91	0	1.75691	0	8.62925	5.30349	3.39307	8.72817	3.12568	0.0235106	0.046236
ZNF625	0	1.75691	0	5.75283	0	10.1792	8.72761	3.12559	0.023174	0.0457079
DTX3L	5.60338	7.02764	1.17765	34.517	63.6419	27.1446	8.7174	3.1239	2.25474e-06	1.87407e-05
RPL7A	149.89	156.365	215.511	903.195	769.006	2877.33	8.70821	3.12238	1.14822e-09	2.6726e-08
LYN	18.211	19.326	28.2637	126.562	265.175	206.978	8.69532	3.12024	6.11797e-13	3.13651e-11
MRM2	1.40084	1.75691	3.53296	8.62925	21.214	37.3238	8.64874	3.11249	0.000309396	0.00127466
SLC6A6	39.2236	22.8398	29.4414	327.911	376.548	98.3991	8.636	3.11036	3.31333e-11	1.11011e-09
SERINC5	1.40084	3.51382	1.17765	20.1349	31.8209	6.78615	8.61456	3.10678	0.000558405	0.00209375
GBE1	26.616	36.8951	14.1319	224.36	323.513	118.758	8.59415	3.10335	1.3224e-11	4.83956e-10
METRN	4.20253	3.51382	2.35531	25.8877	21.214	40.7169	8.58772	3.10227	1.14863e-05	7.73164e-05
RHOF	2.80169	3.51382	3.53296	43.1462	21.214	20.3584	8.58501	3.10182	1.67443e-05	0.000105598
INPP5K	8.40507	3.51382	11.7765	66.1576	26.5175	118.758	8.58425	3.10169	1.6212e-07	1.9596e-06
CARS2	5.60338	5.27073	3.53296	34.517	26.5175	61.0753	8.56824	3.099	1.15625e-06	1.06114e-05
SH3BP4	19.6118	21.0829	30.619	192.72	307.602	135.723	8.56794	3.09895	1.15675e-12	5.66191e-11
SERTAD3	0	5.27073	1.17765	23.0113	0	30.5377	8.56502	3.09846	0.00105824	0.00358903
UBXN11	2.80169	0	1.17765	8.62925	0	30.5377	8.56174	3.0979	0.00418732	0.0111743
CISD1	2.80169	0	2.35531	11.5057	5.30349	33.9307	8.55671	3.09706	0.00116665	0.00389887
ATP5MF	5.60338	14.0553	8.24358	48.8991	15.9105	173.047	8.53106	3.09272	3.16148e-06	2.53383e-05
CUL9	7.00422	3.51382	4.71062	37.3934	53.0349	50.8961	8.50603	3.08849	1.26428e-07	1.57956e-06
DNAJC16	7.00422	5.27073	1.17765	34.517	68.9454	16.9654	8.45379	3.0796	9.68935e-06	6.68475e-05
HACL1	2.80169	0	3.53296	17.2585	26.5175	23.7515	8.45074	3.07908	0.000133947	0.000627231
C1orf216	12.6076	5.27073	2.35531	43.1462	37.1244	91.613	8.45031	3.079	3.7256e-07	4.05419e-06
C5orf15	1.40084	3.51382	2.35531	17.2585	26.5175	23.7515	8.44906	3.07879	0.000109146	0.000524095
C6orf120	2.80169	3.51382	1.17765	14.3821	21.214	30.5377	8.44798	3.07861	0.00015508	0.000712721
AP5S1	5.60338	0	1.17765	28.7642	15.9105	16.9654	8.44538	3.07816	0.000255011	0.00108791
COIL	2.80169	1.75691	2.35531	28.7642	15.9105	16.9654	8.44534	3.07816	0.000137248	0.000641677
H6PD	12.6076	5.27073	8.24358	60.4047	100.766	81.4338	8.44454	3.07802	3.10136e-09	6.34897e-08
KLHL36	4.20253	3.51382	8.24358	54.6519	63.6419	33.9307	8.44224	3.07763	2.04368e-07	2.38542e-06
WASF1	0	1.75691	4.71062	34.517	21.214	6.78615	8.42848	3.07527	0.000597731	0.00221615
TMEM230	4.20253	5.27073	8.24358	51.7755	79.5524	37.3238	8.39053	3.06876	9.30002e-08	1.21956e-06
TMEM18	2.80169	1.75691	1.17765	5.75283	5.30349	40.7169	8.39011	3.06869	0.00218936	0.00652498
SCARF2	1.40084	0	3.53296	17.2585	0	30.5377	8.38801	3.06833	0.00181161	0.00556971
ZNF251	1.40084	3.51382	2.35531	8.62925	42.4279	20.3584	8.36793	3.06487	0.000361657	0.00145127
GTF3C6	5.60338	8.78455	1.17765	57.5283	26.5175	33.9307	8.36041	3.06357	3.13567e-06	2.51828e-05
RPUSD4	5.60338	8.78455	5.88827	46.0227	58.3384	67.8615	8.33783	3.05967	1.69621e-08	2.77126e-07
IQCE	0	1.75691	5.88827	25.8877	15.9105	30.5377	8.33264	3.05877	7.88025e-05	0.000399011
RHOJ	29.4177	8.78455	29.4414	158.203	217.443	223.943	8.32879	3.05811	7.7165e-12	3.07544e-10
MSRA	1.40084	0	1.17765	5.75283	21.214	6.78615	8.3258	3.05759	0.00714876	0.0173667
ZNF44	1.40084	0	1.17765	8.62925	21.214	3.39307	8.32527	3.0575	0.00764367	0.0183739
WHRN	0	0	2.35531	8.62925	15.9105	6.78615	8.32474	3.0574	0.00650163	0.0161038
MOV10L1	1.40084	1.75691	0	5.75283	10.607	13.5723	8.32258	3.05703	0.00593782	0.0149438
GNAI1	0	1.75691	1.17765	11.5057	10.607	6.78615	8.32205	3.05694	0.00559937	0.0142256
TIMM21	0	1.75691	1.17765	14.3821	10.607	3.39307	8.32153	3.05685	0.00703526	0.0171435
CKLF	2.80169	1.75691	2.35531	2.87642	5.30349	54.2892	8.32089	3.05674	0.00243856	0.007158
DBI	14.0084	12.2984	8.24358	80.5396	31.8209	173.047	8.3108	3.05499	1.41573e-07	1.74313e-06
SELENOO	5.60338	1.75691	7.06593	28.7642	21.214	78.0407	8.29521	3.05228	5.78352e-06	4.27794e-05
E2F7	21.0127	19.326	10.5989	247.372	153.801	23.7515	8.29511	3.05226	2.24462e-07	2.59956e-06
PARD3B	5.60338	1.75691	0	31.6406	26.5175	6.78615	8.28818	3.05106	0.000603568	0.0022339
SEC14L2	5.60338	5.27073	2.35531	60.4047	10.607	33.9307	8.28784	3.051	9.48891e-06	6.56169e-05
HLX	4.20253	1.75691	3.53296	17.2585	21.214	47.503	8.28704	3.05086	3.18219e-05	0.000183199
PLA2G12A	0	3.51382	1.17765	2.87642	15.9105	23.7515	8.27916	3.04948	0.00314431	0.00879222
HOXB2	0	0	2.35531	17.2585	5.30349	3.39307	8.2361	3.04196	0.0111198	0.0250822
ALKBH7	1.40084	10.5415	1.17765	25.8877	0	81.4338	8.18717	3.03336	0.00054479	0.00205315
CFAP97	0	5.27073	3.53296	31.6406	42.4279	3.39307	8.18501	3.03298	0.0004821	0.0018515
CRYBG1	1.40084	1.75691	3.53296	20.1349	42.4279	3.39307	8.16492	3.02944	0.000717822	0.00258251
APH1B	1.40084	0	2.35531	5.75283	15.9105	20.3584	8.1484	3.02652	0.0020207	0.00610935
SMIM30	1.40084	3.51382	0	8.62925	21.214	13.5723	8.14679	3.02623	0.00186652	0.00571791
TCTN1	1.40084	0	2.35531	14.3821	10.607	13.5723	8.14582	3.02606	0.00121685	0.0040248
HEXD	1.40084	1.75691	1.17765	14.3821	5.30349	16.9654	8.14371	3.02569	0.00135939	0.00440115
CDKN2A	0	1.75691	2.35531	17.2585	0	16.9654	8.14267	3.0255	0.0024101	0.00708146
TMEM219	21.0127	7.02764	15.3095	112.18	63.6419	183.226	8.13109	3.02345	1.3469e-09	3.09268e-08
MRPL32	4.20253	3.51382	5.88827	40.2698	21.214	50.8961	8.08904	3.01597	1.11265e-06	1.02988e-05
RASA4	1.40084	12.2984	1.17765	28.7642	21.214	64.4684	8.06907	3.0124	3.27194e-05	0.000187388
RPL41	166.7	156.365	207.267	822.655	763.703	2694.1	8.06179	3.0111	3.26017e-09	6.63369e-08
CUEDC1	14.0084	3.51382	5.88827	63.2811	42.4279	84.8268	8.04597	3.00827	1.73967e-08	2.81902e-07
MAP3K6	1.40084	1.75691	0	2.87642	26.5175	3.39307	8.04115	3.0074	0.0141868	0.0306239
TELO2	2.80169	5.27073	5.88827	31.6406	21.214	61.0753	8.03602	3.00648	3.66583e-06	2.88751e-05
STYK1	1.40084	1.75691	1.17765	23.0113	5.30349	6.78615	8.0301	3.00542	0.00248899	0.00728089
NCOA4	15.4093	31.6244	22.3754	195.596	265.175	101.792	8.02981	3.00537	4.27597e-11	1.37828e-09
TAF1C	0	3.51382	7.06593	20.1349	26.5175	47.503	8.01512	3.00272	4.67364e-05	0.000255931
WDR25	1.40084	1.75691	3.53296	23.0113	10.607	23.7515	7.98225	2.9968	0.000192577	0.000858193
MRPS28	1.40084	3.51382	2.35531	23.0113	5.30349	27.1446	7.98019	2.99642	0.000273666	0.00115302
BLOC1S6	2.80169	7.02764	10.5989	71.9104	58.3384	40.7169	7.96216	2.99316	4.67569e-08	6.70032e-07
UNC119B	5.60338	3.51382	8.24358	69.034	31.8209	40.7169	7.94779	2.99055	5.76851e-07	5.91176e-06
COA7	4.20253	1.75691	2.35531	28.7642	10.607	27.1446	7.9369	2.98858	8.16804e-05	0.000411307
SIRT3	0	5.27073	3.53296	28.7642	10.607	27.1446	7.93632	2.98847	0.000120311	0.000570109
ZNF202	0	3.51382	2.35531	11.5057	37.1244	6.78615	7.93102	2.98751	0.00212959	0.00638223
BNIP3	7.00422	8.78455	8.24358	77.6632	31.8209	71.2546	7.92607	2.98661	5.93739e-09	1.12094e-07
LDLRAD3	0	3.51382	4.71062	11.5057	42.4279	23.7515	7.91767	2.98508	0.000240473	0.00103517
ACD	1.40084	3.51382	2.35531	11.5057	10.607	37.3238	7.91532	2.98465	0.000486561	0.00186682
PLA2G15	4.20253	15.8122	16.4872	69.034	42.4279	176.44	7.84116	2.97107	5.82511e-07	5.94206e-06
PLXNA3	12.6076	8.78455	18.8425	123.686	132.587	84.8268	7.83935	2.97073	5.49544e-11	1.73625e-09
ST6GAL1	1.40084	3.51382	11.7765	40.2698	90.1594	13.5723	7.83439	2.96982	4.04937e-05	0.000224772
NRBP2	11.2068	3.51382	2.35531	46.0227	53.0349	40.7169	7.82484	2.96806	4.3689e-07	4.6625e-06
DLC1	7.00422	14.0553	8.24358	92.0453	106.07	33.9307	7.81411	2.96608	9.19713e-08	1.20874e-06
RPS27L	26.616	35.1382	32.9743	218.608	164.408	349.487	7.79513	2.96257	2.40689e-14	1.71422e-12
LMF2	18.211	5.27073	11.7765	80.5396	58.3384	142.509	7.78332	2.96039	2.58709e-08	4.01708e-07
GLRX	11.2068	7.02764	12.9542	126.562	37.1244	78.0407	7.70909	2.94656	1.59945e-08	2.64587e-07
UBE2H	37.8228	42.1658	49.4615	304.9	472.011	247.694	7.70865	2.94648	1.72644e-12	8.00063e-11
PROCR	39.2236	42.1658	41.2179	342.293	116.677	481.816	7.70148	2.94514	6.65727e-10	1.64044e-08
ARFGAP3	5.60338	7.02764	3.53296	60.4047	37.1244	23.7515	7.6942	2.94377	3.1054e-06	2.49808e-05
PLEKHM1	28.0169	31.6244	24.7307	244.495	254.568	152.688	7.687	2.94242	5.79431e-14	3.76599e-12
CD151	113.468	94.8731	124.831	733.486	408.369	1408.13	7.6467	2.93484	1.00275e-09	2.37112e-08
TAX1BP3	30.8186	42.1658	48.2838	221.484	212.14	495.389	7.63881	2.93335	6.9277e-11	2.11277e-09
CNTNAP1	8.40507	7.02764	8.24358	80.5396	58.3384	44.11	7.63857	2.9333	9.89812e-09	1.77302e-07
MLEC	18.211	15.8122	27.0861	232.99	111.373	125.544	7.61555	2.92895	1.16501e-11	4.39894e-10
UQCRH	25.2152	8.78455	28.2637	92.0453	111.373	281.625	7.60659	2.92725	3.44385e-09	6.97806e-08
DHRS4	2.80169	0	1.17765	2.87642	10.607	23.7515	7.59882	2.92578	0.00507081	0.0131313
HMCN1	0	0	2.35531	11.5057	15.9105	0	7.57812	2.92184	0.0180966	0.0375376
SPR	5.60338	5.27073	4.71062	34.517	21.214	61.0753	7.57465	2.92118	4.22963e-06	3.27734e-05
BCAT2	7.00422	5.27073	4.71062	37.3934	15.9105	74.6476	7.57045	2.92038	4.24864e-06	3.28993e-05
ZNF524	2.80169	0	4.71062	20.1349	10.607	33.9307	7.54722	2.91594	0.00024368	0.00104595
gene:ENSG00000272916	4.20253	0	0	31.6406	0	3.39307	7.52402	2.9115	0.0139376	0.0301461
GTF2IRD2B	0	1.75691	4.71062	11.5057	26.5175	23.7515	7.52389	2.91148	0.00048119	0.00184978
TUBE1	2.80169	0	3.53296	17.2585	26.5175	16.9654	7.52297	2.9113	0.000270934	0.00114313
BCL7A	2.80169	1.75691	2.35531	20.1349	26.5175	13.5723	7.5215	2.91102	0.000242228	0.00104122
NAAA	4.20253	1.75691	1.17765	11.5057	42.4279	10.1792	7.4961	2.90614	0.000809342	0.00286482
IL17RA	4.20253	3.51382	4.71062	54.6519	37.1244	6.78615	7.49472	2.90587	8.14267e-05	0.000410203
ZNF266	2.80169	0	2.35531	17.2585	21.214	10.1792	7.48239	2.9035	0.00128903	0.00421085
KTI12	1.40084	0	3.53296	14.3821	15.9105	16.9654	7.48238	2.9035	0.00125913	0.00413704
CORO2B	2.80169	1.75691	1.17765	17.2585	10.607	16.9654	7.4795	2.90294	0.00108231	0.00365711
SDR39U1	1.40084	3.51382	3.53296	11.5057	10.607	44.11	7.47888	2.90282	0.000474365	0.00183007
SH3TC1	14.0084	24.5967	29.4414	152.45	169.712	200.191	7.47571	2.90221	1.51766e-12	7.19163e-11
NUAK1	8.40507	3.51382	8.24358	48.8991	90.1594	30.5377	7.46692	2.90051	7.25716e-07	7.18706e-06
CTIF	22.4135	5.27073	9.42124	86.2925	132.587	74.6476	7.45341	2.8979	2.6994e-08	4.18056e-07
PCDHGA7	2.80169	0	1.17765	20.1349	15.9105	0	7.44479	2.89623	0.00668802	0.0164422
ZNF283	1.40084	0	2.35531	11.5057	15.9105	10.1792	7.42102	2.89162	0.00213726	0.00640155
ZNF775	0	3.51382	1.17765	8.62925	15.9105	13.5723	7.42002	2.89142	0.00244719	0.0071727
SETMAR	0	3.51382	1.17765	5.75283	10.607	20.3584	7.41954	2.89133	0.00374659	0.0101693
TMEM14A	0	0	3.53296	17.2585	0	13.5723	7.41771	2.89097	0.00525655	0.0135065
TCAF2	0	1.75691	2.35531	17.2585	5.30349	10.1792	7.41769	2.89097	0.00293094	0.00829422
MYD88	4.20253	10.5415	5.88827	74.7868	47.7314	27.1446	7.41224	2.88991	1.47957e-06	1.30889e-05
C8orf82	5.60338	5.27073	5.88827	46.0227	21.214	54.2892	7.41065	2.8896	1.12159e-06	1.03492e-05
ATG12	7.00422	1.75691	9.42124	66.1576	58.3384	23.7515	7.40304	2.88812	2.81522e-06	2.28874e-05
MSRB2	1.40084	5.27073	4.71062	8.62925	10.607	67.8615	7.39935	2.8874	0.000588233	0.00218707
NOP53	37.8228	36.8951	45.9285	163.956	159.105	570.036	7.3729	2.88223	5.42954e-09	1.04497e-07
HYAL2	75.6456	65.0057	81.2582	402.698	461.404	780.407	7.36914	2.8815	9.34208e-13	4.66868e-11
OSTC	18.211	5.27073	16.4872	129.439	116.677	64.4684	7.35192	2.87812	3.63266e-09	7.3168e-08
[truncated: 4,183 more rows]
