# Supplementary material for: Distinct brain and lung endothelial miRNA/mRNA profiles after exposure to Plasmodium falciparum-infected red blood cells
Source: iScience. 2024 Oct 28;27(11):111265. doi: 10.1016/j.isci.2024.111265 (PMC11576406; doi:10.1016/j.isci.2024.111265)
Supplement: Table S7. miRNA profiles of HBMEC1.5+Rings and HBMEC1.5+RBCs/ miRNA-mRNA targets within HBMEC1.5+rings [file mmc8.xlsx]

## Sheet: IsoMirs
Name	HMBEC-flow-RBCs-1	HBMEC-flow-RBCs-2	HBMEC-flow-RBCs-3	HBMEC-flow-IT4-rings-1	HBMEC-flow-IT4-rings-2	HBMEC-flow-IT4-rings-3	Fold change	Log fold change	P-value	FDR
hsa-miR-103b	0.994883	0.634266	3.67153	24.5495	50.6925	553.931	119.047	6.89539	2.00675e-07	0.000239606
hsa-miR-4485-3p	11.3959	6.60972	8.96285	398.654	260.505	187.282	31.5696	4.98046	1.11598e-05	0.00350645
hsa-miR-4759	2.53243	2.83751	0.215972	99.0476	7.42974	41.2044	26.0003	4.70046	8.29634e-06	0.00350645
hsa-miR-4715-5p	909.504	5.1409	16.0899	7.39034	2.2444	6.98379	-55.9199	-5.80529	1.26654e-05	0.00350645
hsa-miR-4684-3p	984.662	7.07708	10.7986	2.71829	7.19756	7.62397	-57.0612	-5.83444	1.46836e-05	0.00350645
hsa-miR-4645-5p	1.53755	0.433972	1.40382	45.0216	0.0773931	59.7114	30.938	4.95131	2.35082e-05	0.00467814
hsa-miR-633	0.904439	2.06971	3.23958	183.145	1.0835	61.3992	39.3389	5.29788	3.06315e-05	0.00522485
hsa-miR-888-5p	3.88909	2.97104	4.85938	54.3657	90.163	53.135	17.2296	4.10682	4.87821e-05	0.00728073
hsa-miR-548b-3p	5.1553	0.534119	0.215972	111.025	3.94705	87.4138	34.1723	5.09476	5.51412e-05	0.00731541
hsa-miR-6739-3p	1226.24	10.4487	29.6962	10.0237	3.79226	14.375	-44.8735	-5.48779	7.18045e-05	0.00857346
hsa-miR-34c-3p	12.1195	39.6917	12.9583	1041.36	33.5886	1531.02	40.1724	5.32813	9.42838e-05	0.00938124
hsa-miR-1267	3.34642	21.3648	4.10347	0.764518	0.851324	0.116397	-16.7589	-4.06685	9.0889e-05	0.00938124
hsa-miR-5580-3p	1.62799	3.6053	1.83576	25.7388	56.2648	20.9514	14.109	3.81854	0.000114062	0.0104761
hsa-miR-6769a-5p	3.97953	6.91016	2.48368	197.84	7.50713	112.206	23.5785	4.5594	0.00012778	0.0108978
hsa-miR-4509	2.53243	9.64752	0.755903	194.697	19.1935	86.7736	22.9803	4.52232	0.000160651	0.0119886
hsa-miR-599	149.865	7.01031	9.28681	1.78388	4.17923	3.55009	-17.4108	-4.12191	0.000152379	0.0119886
hsa-miR-6503-3p	1.71843	5.40795	4.31945	175.075	1.62526	71.0601	21.537	4.42874	0.000176595	0.0122185
hsa-miR-4259	585.895	1.26853	13.6063	9.42906	2.86354	5.17965	-34.3444	-5.102	0.000184198	0.0122185
hsa-miR-589-3p	1.98977	0.233677	1.72778	0.764518	78.0122	2.90991	20.6463	4.36781	0.000222595	0.0139884
hsa-miR-3150b-3p	6.15018	4.23957	2.59167	56.9991	350.591	0.465586	31.3329	4.96961	0.000275202	0.014936
hsa-miR-10399-5p	1.89932	7.01031	3.99549	137.953	1.47047	156.903	22.8367	4.51328	0.000252312	0.014936
hsa-miR-3147	342.782	4.97398	9.07084	5.52152	5.41752	3.4919	-24.6936	-4.62607	0.000265139	0.014936
hsa-miR-561-3p	1.08533	17.2587	2.26771	300.031	7.73931	185.711	23.8067	4.57329	0.000350129	0.016079
hsa-miR-4273	43.3226	12.0844	3.02361	2.29355	1.00611	2.73532	-9.6313	-3.26773	0.000320654	0.016079
hsa-miR-7703	49.8346	5.37457	6.91111	1.69893	1.39308	2.15334	-11.7652	-3.55646	0.000339443	0.016079
hsa-miR-4423-5p	464.158	9.34708	10.3667	5.26668	1.47047	11.3487	-26.7015	-4.73885	0.00033345	0.016079
hsa-miR-5588-3p	9.67749	0.26706	1.83576	2.46345	463.198	3.4919	39.7576	5.31316	0.000449645	0.0171622
hsa-miR-8083	8.41128	4.40648	6.2632	190.79	0.309572	205.964	20.7816	4.37724	0.000392889	0.0171622
hsa-miR-3909	3.61775	5.44134	1.29583	94.8852	6.03666	84.7949	17.7556	4.15021	0.000443928	0.0171622
hsa-miR-4720-3p	1.26621	4.67354	1.18785	53.4313	3.01833	27.4696	11.5667	3.53191	0.000456722	0.0171622
hsa-miR-377-3p	214.895	0.534119	31.8559	2.29355	5.41752	6.98379	-16.7912	-4.06964	0.000459958	0.0171622
hsa-miR-6501-5p	468.771	49.2725	16.4139	4.84195	6.26884	15.3643	-20.1543	-4.33301	0.000454558	0.0171622
hsa-miR-424-3p	14.5615	13.0859	22.5691	624.017	32.7373	318.577	19.4211	4.27955	0.000482885	0.0174717
hsa-miR-503-3p	1.35666	0.333824	7.23507	85.1164	10.6029	33.1148	14.5103	3.859	0.000513392	0.0180291
hsa-miR-2681-3p	0.361775	1.7025	3.99549	47.7399	3.86965	25.6654	12.7476	3.67215	0.000600003	0.0204687
hsa-miR-4793-3p	7.23551	0.934708	11.4465	209.648	4.33401	135.602	17.8379	4.15687	0.000679645	0.0225416
hsa-miR-4289	2.35154	2.13648	6.91111	16.9893	55.4135	62.3886	11.9329	3.57687	0.000823868	0.0245925
hsa-miR-187-3p	4.70308	0.333824	3.77952	45.2765	4.56619	42.7175	10.5402	3.39782	0.000808456	0.0245925
hsa-miR-3194-5p	5.78841	4.47325	5.61528	29.9861	84.6681	41.379	9.85893	3.30143	0.000772206	0.0245925
hsa-miR-375-3p	439.195	13.5199	19.4375	10.1936	11.0672	7.04199	-16.6711	-4.05927	0.000800881	0.0245925
hsa-miR-7854-3p	5.78841	45.1664	4.31945	1.44409	0.851324	2.44433	-11.6018	-3.53628	0.000887503	0.0258458
hsa-miR-150-5p	88.2732	35.4521	53.9931	903.406	43.1853	2869.93	21.4736	4.42449	0.000915387	0.0258976
hsa-miR-138-5p	18.9028	10.4153	48.0538	706.585	31.886	512.96	16.1805	4.01619	0.000932659	0.0258976
hsa-miR-4646-3p	196.082	13.1861	6.47917	3.14302	3.01833	8.08956	-15.0971	-3.9162	0.00100741	0.0273375
hsa-miR-4301	3.61775	4.70692	9.3948	25.4839	167.246	21.5334	12.0952	3.59636	0.00108748	0.0288545
hsa-miR-3160-3p	53.5428	26.2052	109.498	4.41722	9.98371	0.581983	-12.6297	-3.65875	0.0011994	0.0311323
hsa-miR-1283	0.452219	29.0427	1.40382	1.69893	0	0.0581983	-17.5146	-4.13048	0.00158996	0.0403918
hsa-miR-144-3p	4282.43	79.6171	1384.38	178.303	16.6395	87.763	-20.3253	-4.34521	0.00168218	0.0418441
hsa-miR-596	19.6263	4.60678	30.5601	3.73764	1458.01	13.502	26.9178	4.75049	0.00177039	0.0431397
hsa-miR-196b-3p	1.53755	32.5479	1.94375	329.337	4.72098	369.501	19.4701	4.28319	0.0018442	0.0440395
hsa-miR-556-3p	4.06997	0.300442	2.15972	1.1043	167.943	0	25.7963	4.68909	0.00196675	0.0460452
hsa-miR-1915-5p	5.06486	49.5395	9.17882	625.376	3.56008	386.786	15.9005	3.991	0.00237895	0.0546245
hsa-miR-6729-3p	1.80888	1.80265	3.77952	1.78388	72.2078	2.15334	10.2786	3.36157	0.00244152	0.0550034
hsa-miR-5697	6.51196	6.64311	6.2632	154.857	1.47047	70.0707	11.6354	3.54045	0.0024958	0.0551849
hsa-miR-494-3p	82.0326	0.467354	19.9774	0.254839	5.03055	3.3173	-11.8707	-3.56933	0.00278174	0.0603891
hsa-miR-4761-5p	5.24574	11.6505	9.82674	194.952	15.556	77.9275	10.7644	3.4282	0.00288911	0.0607092
hsa-miR-370-3p	156.287	6.70987	153.88	0.849465	18.9613	0.407388	-15.6596	-3.96897	0.00289818	0.0607092
hsa-miR-4789-3p	3.79864	2.30339	4.96736	1.61398	161.21	2.21153	14.8819	3.89549	0.0031022	0.0629149
hsa-miR-148a-5p	2.62287	0.300442	4.31945	3.4828	25.0754	29.2155	8.03711	3.00668	0.00310886	0.0629149
hsa-miR-1294	53.9045	2.43692	61.1202	5.43657	9.59674	2.44433	-6.71409	-2.74719	0.00322549	0.0641873
hsa-miR-144-5p	322.794	15.0889	485.506	38.8205	6.11405	31.3689	-10.7869	-3.43121	0.00331479	0.0648828
hsa-miR-4787-5p	2.53243	67.4659	4.64341	1.69893	1.00611	4.01568	-11.0614	-3.46746	0.00348558	0.0671256
hsa-miR-3651	12.4813	3.17133	22.2452	6.0312	347.031	164.934	13.6749	3.77346	0.00360353	0.0677271
hsa-miR-10a-5p	1124.49	412.473	1116.79	18122.1	1421.94	12909.2	12.2293	3.61227	0.00363026	0.0677271
hsa-miR-200a-5p	36.1775	1.46883	28.1844	5.60647	1515.43	5.99442	23.1913	4.53551	0.00378108	0.0687145
hsa-miR-449b-3p	4.88397	2.50368	7.55903	42.0485	18.6517	32.4164	6.32027	2.65999	0.00379829	0.0687145
hsa-miR-6124	4.43175	21.5317	15.334	3.73764	1.47047	0.290991	-7.55065	-2.9166	0.00434017	0.0751038
hsa-miR-142-5p	339.436	18.5606	132.391	21.4915	28.2485	1.74595	-9.52374	-3.25153	0.0042793	0.0751038
hsa-miR-3613-5p	435.306	16.7246	220.292	31.6001	28.945	4.83046	-10.2833	-3.36223	0.00423476	0.0751038
hsa-miR-328-3p	71.4507	45.7673	58.9604	1143.21	85.7516	854.409	11.8248	3.56374	0.00453684	0.0766609
hsa-miR-10a-3p	9.76794	0.701031	15.1181	72.7991	71.8982	51.3891	7.68847	2.9427	0.00455856	0.0766609
hsa-miR-6742-5p	4.52219	49.1056	9.61077	1.95377	4.25662	0.232793	-9.82624	-3.29664	0.00463319	0.0768337
hsa-miR-7151-3p	1.62799	1.16839	3.8875	34.913	0.851324	13.6184	7.39993	2.88751	0.00484308	0.0792142
hsa-miR-216a-5p	61.7732	0.634266	34.9875	1.95377	4.02444	5.17965	-8.69962	-3.12095	0.0049465	0.0798124
hsa-miR-5684	13.1144	294.934	46.3261	8.4097	11.9959	11.1159	-11.238	-3.49031	0.0050545	0.0804677
hsa-miR-554	7.68773	10.8493	11.9865	156.641	8.35845	60.2352	7.3695	2.88157	0.00515978	0.0810628
hsa-miR-1910-3p	2.44198	8.1787	1.83576	20.7269	6.65581	70.8273	7.79866	2.96323	0.00538502	0.0830221
hsa-miR-1251-5p	2.98465	8.11193	3.8875	36.6969	24.6884	36.5485	6.36619	2.67043	0.00542355	0.0830221
hsa-miR-6816-3p	3.79864	0.467354	3.23958	2.63334	91.8656	0.174595	12.5943	3.6547	0.00556608	0.0841253
hsa-miR-6514-5p	10.8533	2.93765	3.1316	126.825	0.386965	37.8289	9.73931	3.28382	0.00568232	0.0848086
hsa-miR-6768-3p	4.43175	3.67207	5.72327	27.4377	26.391	18.7398	5.38981	2.43023	0.00582744	0.0859008
hsa-miR-7160-3p	3.88909	0.300442	4.96736	2.80323	89.5438	3.02631	10.4214	3.38147	0.00590886	0.0860388
hsa-miR-4777-5p	2.08021	106.323	4.75139	2.29355	2.63137	5.52884	-10.8006	-3.43304	0.00632948	0.091053
hsa-miR-520g-5p	8.32084	24.7698	9.17882	65.2389	324.587	46.2676	10.2827	3.36215	0.00682627	0.0970306
hsa-miR-510-3p	76.1537	3.27148	5.72327	5.35163	4.41141	2.15334	-7.1383	-2.83558	0.00690791	0.0970358
hsa-miR-8070	35.0922	162.272	31.208	6.45593	7.12017	10.9995	-9.29323	-3.21618	0.00706927	0.0981478
hsa-miR-643	3.7082	0.534119	2.80764	15.885	1.0835	36.7813	7.64617	2.93474	0.00762121	0.099997
hsa-miR-149-3p	3.61775	5.54148	3.23958	37.8861	3.79226	26.3638	5.44667	2.44538	0.00734098	0.099997
hsa-miR-4418	2.44198	3.73883	4.10347	9.76884	24.1466	15.4225	4.77353	2.25506	0.00758342	0.099997
hsa-miR-937-3p	2.71332	89.6318	8.09896	5.26668	0.619145	4.30667	-9.8436	-3.29919	0.00757911	0.099997
hsa-miR-136-5p	68.9182	0.433972	20.7333	3.31291	0.154786	5.58703	-9.91275	-3.30929	0.00741388	0.099997
hsa-miR-4762-5p	31.5649	8.07855	31.316	73.3937	331.088	225.693	8.89313	3.15269	0.00779828	0.100327
hsa-miR-6755-3p	469.404	5.40795	13.3903	28.3721	2.01222	10.3593	-11.9777	-3.58228	0.00781438	0.100327
hsa-miR-548e-5p	9.31572	5.17428	5.93924	15.2054	102.701	18.4489	6.67157	2.73803	0.00797507	0.1013
hsa-miR-340-3p	37.082	61.19	68.3552	1037.03	49.9185	405.758	8.95612	3.16287	0.00824754	0.103659
hsa-miR-4452	18.3601	16.0903	7.12709	3.4828	2.55397	0	-6.89606	-2.78577	0.00840585	0.104548
hsa-miR-138-1-3p	3.79864	4.9406	1.51181	15.8	11.1446	24.4433	4.89488	2.29127	0.00896883	0.1104
hsa-miR-6513-3p	7.32595	80.7187	13.7142	8.83443	2.70876	0.581983	-8.40595	-3.07141	0.00908182	0.11065
hsa-miR-3186-3p	7.68773	4.3731	2.3757	19.8775	1.31568	74.4356	6.60854	2.72433	0.0100348	0.112452
hsa-miR-1258	7.05462	9.64752	4.10347	10.1086	74.1426	45.6274	6.2072	2.63394	0.00949499	0.112452
hsa-miR-34b-3p	2.44198	4.10604	2.3757	17.499	6.81059	28.1098	5.77979	2.53102	0.00982869	0.112452
hsa-miR-2115-5p	5.51708	8.07855	5.39931	68.8916	15.4012	19.38	5.42411	2.43939	0.0100774	0.112452
hsa-miR-6865-3p	2.80376	2.16986	5.50729	14.7807	18.11	16.9357	4.94751	2.3067	0.00973946	0.112452
hsa-miR-1285-3p	19.2645	22.8002	3.23958	3.05807	2.32179	2.96811	-5.43248	-2.44161	0.00978108	0.112452
hsa-miR-500a-3p	41.8755	1.76927	8.85487	0.424732	1.47047	4.53947	-8.09263	-3.01661	0.00938222	0.112452
hsa-miR-4649-3p	6.6024	201.029	15.226	7.47529	3.56008	11.9306	-9.69548	-3.27731	0.00966824	0.112452
hsa-miR-3937	2.44198	59.2204	0.539931	2.54839	2.86354	0.116397	-11.2448	-3.49119	0.0100627	0.112452
hsa-miR-4456	4.61264	26.8729	11.5545	198.52	20.5866	96.5509	7.31141	2.87015	0.0102033	0.112803
hsa-miR-4699-5p	1.71843	9.48061	5.39931	39.4152	47.5194	28.5754	6.865	2.77926	0.0104175	0.114115
hsa-miR-8056	3.43687	2.87089	7.0191	6.37098	71.5886	8.03136	6.45735	2.69094	0.0108219	0.117467
hsa-miR-4733-3p	7.77817	6.2759	4.31945	4.50216	133.194	4.71406	7.73281	2.95099	0.011897	0.12744
hsa-miR-4695-3p	49.0206	62.8591	26.6726	11.128	7.73931	4.77226	-5.88937	-2.55811	0.0119542	0.12744
hsa-miR-4308	4.52219	7.4109	9.28681	6.62582	162.216	6.28541	8.23967	3.04259	0.0128924	0.132703
hsa-miR-492	4.25086	10.5489	1.94375	9.514	120.269	1.97874	7.82862	2.96876	0.0128772	0.132703
hsa-miR-4641	3.61775	13.5533	5.83125	15.2054	7.35234	125.068	6.39311	2.67652	0.0126086	0.132703
hsa-miR-3200-3p	8.77306	16.3908	3.67153	97.6035	7.50713	75.6578	6.2425	2.64212	0.0127233	0.132703
hsa-miR-3620-3p	5.78841	3.13795	5.61528	5.86131	69.1894	11.3487	5.94377	2.57138	0.0132071	0.134781
hsa-miR-4279	12.3004	15.0555	6.04723	7.3054	234.656	16.2955	7.71641	2.94793	0.0133599	0.135184
hsa-miR-8081	44.4079	13.1527	3.1316	3.73764	3.79226	4.07388	-5.22059	-2.38421	0.0135818	0.136275
hsa-miR-12136	149.232	9.71429	80.1257	10.0237	3256.24	17.6923	13.7353	3.77982	0.0142042	0.137966
hsa-miR-4763-5p	4.88397	10.3486	6.15521	53.1765	32.3503	43.8815	5.93179	2.56847	0.0140626	0.137966
hsa-miR-1243	3.16554	2.50368	1.29583	5.18173	3.86965	28.168	5.30823	2.40823	0.0142126	0.137966
hsa-miR-4455	11.3959	10.7158	22.2452	5.69141	1.93483	1.04757	-5.13362	-2.35998	0.0141454	0.137966
hsa-miR-24-1-5p	6.33107	0.166912	4.31945	3.56775	65.0876	6.92559	6.99262	2.80583	0.014613	0.140709
hsa-miR-132-3p	37.4438	6.94355	39.8469	50.3732	629.593	24.1523	8.36021	3.06354	0.0150435	0.141542
hsa-let-7e-3p	93.2476	8.51252	75.4823	623.252	92.9491	669.688	7.82127	2.9674	0.0151994	0.141542
hsa-miR-8485	15.6468	3.10457	6.15521	14.356	85.9837	46.675	5.91231	2.56372	0.0152922	0.141542
hsa-miR-7852-3p	7.05462	6.30928	2.69965	65.5787	1.93483	24.0941	5.68076	2.50608	0.0151692	0.141542
hsa-miR-10392-3p	9.85838	369.043	14.2542	8.74949	10.2159	21.3588	-9.7446	-3.2846	0.0150297	0.141542
hsa-miR-3193	1.71843	2.4703	4.21146	2.20861	61.3727	0.174595	7.56535	2.91941	0.0158683	0.145745
hsa-miR-616-3p	3.07509	2.73736	3.34757	34.3184	0.0773931	27.2368	6.70729	2.74573	0.0163519	0.14904
hsa-miR-1287-3p	4.16042	5.5081	6.04723	32.5345	21.0509	14.0258	4.28175	2.0982	0.0176312	0.159483
hsa-miR-92a-1-5p	10.4915	2.4703	5.07535	25.5689	84.2811	8.26416	6.55534	2.71267	0.0179306	0.15996
hsa-miR-1249-5p	4.16042	3.97251	3.56354	47.0603	2.01222	17.8669	5.7025	2.51159	0.018086	0.15996
hsa-miR-505-3p	69.1896	4.9406	27.8604	0.594625	3.25051	14.7242	-5.47523	-2.45292	0.0179548	0.15996
hsa-miR-9903	7.59729	5.34119	1.94375	29.4764	6.96538	22.9301	3.96747	1.98822	0.0183686	0.161265
hsa-miR-523-3p	3.52731	3.2381	0.755903	2.46345	23.5275	13.1528	5.14546	2.3633	0.0186649	0.162671
hsa-miR-302a-5p	10.5819	1.20177	1.40382	0.169893	103.242	9.95191	8.5828	3.10145	0.019055	0.164867
hsa-miR-345-5p	452.762	17.6927	138.33	21.5764	30.3381	42.6011	-6.43813	-2.68664	0.0195564	0.167988
hsa-miR-4720-5p	7.4164	123.348	7.23507	7.3054	4.17923	6.11082	-7.84249	-2.97131	0.0204299	0.174238
hsa-miR-3910	0.633107	3.2381	1.94375	1.1043	1.1609	35.5009	6.42889	2.68457	0.0208429	0.175257
hsa-miR-4425	196.987	1.00147	9.50278	13.7613	14.7821	2.50253	-6.6808	-2.74002	0.0207676	0.175257
hsa-miR-6849-3p	3.79864	3.33824	11.8785	13.1667	6.26884	73.97	4.92281	2.29948	0.0212912	0.177774
hsa-miR-6878-3p	23.0632	43.8645	11.6625	24.1248	508.705	32.4164	7.18431	2.84485	0.0219725	0.178586
hsa-miR-296-3p	44.5888	8.61267	58.2045	128.864	626.962	27.6442	7.03416	2.81438	0.0236087	0.178586
hsa-miR-651-5p	10.9437	5.74178	14.5781	13.4215	79.4827	104	6.31077	2.65782	0.0222118	0.178586
hsa-miR-12120	10.7628	6.30928	4.75139	28.0323	77.9349	19.9038	5.75916	2.52586	0.0219836	0.178586
hsa-miR-661	5.06486	17.4924	2.05174	20.4721	6.34623	112.672	5.64195	2.49619	0.022499	0.178586
hsa-miR-1234-3p	2.80376	0.801179	5.18334	3.31291	38.2322	4.48127	5.25738	2.39434	0.0234591	0.178586
hsa-miR-6835-3p	6.24063	0.901326	3.1316	15.5452	14.5499	17.9251	4.7327	2.24266	0.0232989	0.178586
hsa-miR-498-5p	4.79353	3.93913	1.83576	13.8463	5.80448	24.9089	4.18503	2.06524	0.0223634	0.178586
hsa-miR-5571-3p	1.98977	5.57487	4.21146	10.2785	27.5519	10.7667	4.07344	2.02625	0.0230824	0.178586
hsa-miR-205-5p	2.98465	5.20766	2.80764	7.81507	23.2179	12.5126	3.88229	1.95691	0.022673	0.178586
hsa-miR-450a-2-3p	40.8806	10.9161	10.5826	2.46345	3.79226	8.08956	-4.32426	-2.11245	0.0236639	0.178586
hsa-miR-1237-5p	11.8481	24.0687	7.55903	2.03871	5.88188	1.92054	-4.43959	-2.15043	0.023243	0.178586
hsa-miR-3157-3p	22.7014	15.9902	3.34757	1.52904	6.50102	0.407388	-4.98643	-2.31801	0.0233812	0.178586
hsa-miR-106b-3p	89.7203	5.07413	59.7163	10.4484	4.4888	14.084	-5.31525	-2.41014	0.0229393	0.178586
hsa-miR-5006-5p	4.88397	23.0005	1.51181	1.78388	3.17312	0.116397	-5.81167	-2.53895	0.0222088	0.178586
hsa-miR-2355-3p	139.917	12.919	3.56354	10.6183	9.05499	6.11082	-6.06222	-2.59985	0.0237816	0.178586
hsa-miR-4776-3p	230.903	36.9877	34.4476	7.73013	37.4583	10.4757	-5.42971	-2.44087	0.0241559	0.180263
hsa-miR-5002-5p	7.95906	256.945	29.2643	18.2635	14.6273	8.67154	-7.0794	-2.82363	0.0245904	0.182366
hsa-miR-125a-3p	3.97953	0.400589	10.1507	38.2259	9.59674	25.3163	5.05634	2.33809	0.0249801	0.184113
hsa-miR-3116	39.4335	50.9082	71.1629	20.3871	6.26884	4.59766	-5.1761	-2.37186	0.0252663	0.184186
hsa-miR-553	20.169	63.8606	16.6299	7.81507	0.851324	9.66091	-5.48828	-2.45635	0.0252986	0.184186
hsa-miR-548ao-5p	5.78841	57.2175	5.39931	5.09679	4.72098	0.290991	-6.77799	-2.76086	0.0259106	0.187498
hsa-miR-660-5p	90.263	31.513	137.142	20.2173	13.6212	12.629	-5.56823	-2.47722	0.0265706	0.191116
hsa-miR-1193	6.6024	58.7531	10.1507	3.22797	8.04888	1.74595	-5.80805	-2.53805	0.0269168	0.191346
hsa-miR-5093	3.07509	70.3702	6.91111	7.56023	4.33401	0.174595	-6.66437	-2.73647	0.026923	0.191346
hsa-miR-4460	13.8379	16.9917	7.12709	19.2828	71.1243	103.942	5.10391	2.3516	0.0273461	0.193202
hsa-miR-342-3p	129.063	17.7261	132.931	597.598	522.558	882.868	7.1641	2.84079	0.0276633	0.194294
hsa-miR-6770-3p	22.5205	64.1944	18.5736	8.83443	5.03055	7.97316	-4.8313	-2.27241	0.0280166	0.195625
hsa-miR-582-3p	8.59217	13.0525	17.3858	2.54839	1.85743	6.57641	-3.51658	-1.81417	0.0286829	0.198264
hsa-miR-3122	66.024	5.7084	8.96285	2.46345	13.6212	1.68775	-4.53699	-2.18173	0.0287267	0.198264
hsa-miR-7977	116.22	19.3618	100.319	117.651	569.768	918.252	6.80836	2.76731	0.0292206	0.199148
hsa-miR-5571-5p	10.5819	13.6534	11.2306	42.3033	56.5744	86.4244	5.19936	2.37833	0.0296076	0.199148
hsa-miR-4793-5p	5.60752	0.433972	3.02361	17.414	1.00611	24.1523	4.70734	2.23491	0.0295966	0.199148
hsa-miR-5089-5p	33.1025	70.8042	19.6535	5.01184	14.8595	5.29604	-4.91702	-2.29778	0.0296887	0.199148
hsa-miR-6756-5p	1.53755	29.8105	2.48368	2.12366	0.851324	3.20091	-5.47243	-2.45218	0.0296718	0.199148
hsa-miR-4433a-5p	1.80888	1.86942	5.29132	9.6839	3.48269	26.9458	4.50097	2.17024	0.0300579	0.200498
hsa-miR-485-3p	364.579	1.36868	122.348	3.39786	55.723	0.581983	-8.17645	-3.03147	0.0303924	0.201603
hsa-miR-4254	2.44198	8.87973	3.02361	2.20861	97.7475	1.39676	7.02928	2.81338	0.0315328	0.203514
hsa-miR-4681	2.98465	0.400589	7.45105	3.82259	64.0815	0.290991	6.29455	2.6541	0.0312546	0.203514
hsa-miR-7844-5p	2.98465	0.0667649	6.04723	2.46345	45.5845	3.3173	5.65254	2.4989	0.0310954	0.203514
hsa-miR-4710	2.80376	19.0614	2.15972	1.18925	2.08961	2.21153	-4.38666	-2.13312	0.0315193	0.203514
hsa-miR-495-3p	237.777	1.23515	92.3282	9.25916	35.0591	14.5496	-5.62621	-2.49216	0.0309438	0.203514
hsa-miR-3180	10.2202	59.7546	13.7142	5.60647	8.66803	2.50253	-5.00165	-2.3224	0.03174	0.20375
hsa-miR-939-3p	4.52219	19.3618	6.2632	46.9754	8.82281	119.888	5.80362	2.53695	0.0319801	0.204194
hsa-miR-1538	28.8516	19.1949	19.0056	27.1829	81.4949	248.157	5.3213	2.41178	0.0326538	0.204525
hsa-miR-6753-3p	8.59217	42.8631	16.5219	6.28604	5.95927	3.78289	-4.25943	-2.09066	0.0323511	0.204525
hsa-miR-6850-5p	15.0137	18.594	23.433	4.50216	7.19756	0.34919	-4.74096	-2.24518	0.0326506	0.204525
hsa-miR-3186-5p	4.16042	28.809	2.3757	3.31291	3.01833	0.290991	-5.35843	-2.42181	0.0328353	0.204525
hsa-miR-579-5p	6.05974	188.244	16.0899	7.73013	13.0794	12.5126	-6.31317	-2.65836	0.0328884	0.204525
hsa-miR-1244	28.7612	3.77222	6.2632	222.135	7.19756	17.7505	6.36674	2.67055	0.0341678	0.21029
hsa-miR-3921	8.0495	3.0378	4.75139	9.514	22.831	18.3907	3.23247	1.69264	0.0341237	0.21029
hsa-miR-634	109.618	1.36868	35.8514	8.49465	2.39919	18.2161	-5.03714	-2.3326	0.0352279	0.215703
hsa-miR-3149	85.1077	0.567501	6.2632	8.06991	0.0773931	6.40181	-6.30961	-2.65755	0.0355686	0.216678
hsa-miR-6730-5p	1.89932	5.7084	2.59167	4.50216	6.26884	31.7763	4.12848	2.04561	0.0366018	0.22184
hsa-miR-10393-5p	8.50172	4.30633	2.69965	11.8076	17.723	27.4696	3.67584	1.87808	0.037006	0.223158
hsa-miR-3918	3.88909	6.2759	3.99549	13.2516	39.2383	4.48127	3.99571	1.99845	0.0386679	0.232008
hsa-miR-642a-5p	6.33107	7.21061	4.85938	3.31291	85.3646	6.8674	5.17778	2.37233	0.0389629	0.232608
hsa-miR-30c-1-3p	18.6314	5.74178	8.20695	66.8529	29.4868	47.7226	4.43454	2.14879	0.0391655	0.232655
hsa-miR-875-3p	8.41128	28.0746	7.66702	25.7388	214.069	9.54452	5.63399	2.49416	0.0400626	0.233178
hsa-miR-624-5p	80.0428	12.6853	102.803	21.3216	8.66803	12.6872	-4.57809	-2.19474	0.0394891	0.233178
hsa-miR-6886-5p	6.69285	69.1684	8.85487	7.1355	5.5723	5.41244	-4.68246	-2.22727	0.0401419	0.233178
hsa-miR-142-3p	328.944	18.7275	116.625	15.0355	28.945	50.3997	-4.91644	-2.29761	0.040007	0.233178
hsa-miR-571	1826.06	5.00737	34.6636	205.061	4.10183	14.8988	-8.32649	-3.05771	0.0402301	0.233178
hsa-miR-2467-3p	3.16554	51.5091	2.15972	81.8884	1.62526	337.434	7.39438	2.88643	0.0410361	0.236701
hsa-miR-15a-5p	197022	2176.27	54360.3	12561.4	3520.53	24819.5	-6.19925	-2.63209	0.0418461	0.240213
hsa-miR-3120-5p	191.289	121.646	151.505	64.3045	2962.38	174.944	6.89316	2.78517	0.0421774	0.240956
hsa-miR-3919	3.43687	12.5184	3.1316	15.2904	35.446	39.1674	4.64903	2.21693	0.042547	0.24191
hsa-miR-3126-5p	6.24063	68.2671	10.2587	3.73764	8.35845	6.34361	-4.60041	-2.20176	0.0430956	0.243868
hsa-miR-759	6.78329	0.200295	1.83576	1.1043	40.8636	3.72469	5.17898	2.37267	0.0439916	0.245449
hsa-miR-450a-5p	33.1929	7.51105	17.6017	166.92	8.51324	113.661	4.95956	2.31021	0.043964	0.245449
hsa-miR-4271	4.61264	87.7958	5.61528	6.45593	9.20978	2.90991	-5.28216	-2.40113	0.0438648	0.245449
hsa-miR-1825	6.51196	39.458	15.334	6.0312	5.41752	2.73532	-4.34089	-2.11799	0.0443118	0.246085
hsa-miR-1295b-5p	1.71843	1.76927	6.91111	24.0398	0.619145	22.3481	4.528	2.17887	0.0457629	0.252155
hsa-miR-2114-5p	1.53755	33.4158	11.2306	2.46345	2.94094	4.19028	-4.81171	-2.26655	0.0458272	0.252155
hsa-miR-4272	2.71332	21.0643	5.39931	1.52904	2.32179	3.4919	-3.97687	-1.99163	0.0464729	0.253373
hsa-miR-137-3p	22.0683	3.63869	33.2597	2.29355	10.7576	0.407388	-4.37637	-2.12973	0.046326	0.253373
hsa-miR-384	4.34131	3.00442	8.96285	14.0162	33.3564	9.13713	3.48782	1.80232	0.0467755	0.253863
hsa-miR-6720-3p	4.79353	8.44576	7.55903	5.94625	14.6273	78.9169	4.77424	2.25527	0.0472756	0.255417
hsa-miR-4442	1.80888	27.9745	0.971875	0.934411	3.48269	2.15334	-4.68395	-2.22773	0.0477415	0.256772
hsa-miR-301a-5p	11.0342	6.20913	9.28681	44.2571	19.1935	29.0991	3.50962	1.81131	0.0480075	0.257044
hsa-miR-6771-3p	34.8209	6.14237	8.42292	17.5839	82.501	121.984	4.49891	2.16957	0.0485012	0.25738
hsa-miR-1180-5p	5.69796	37.7222	0.647917	4.757	1.00611	2.21153	-5.53258	-2.46795	0.0484646	0.25738
hsa-miR-3125	6.24063	73.3746	21.1653	5.94625	11.8411	4.19028	-4.59164	-2.19901	0.0487592	0.257604
hsa-miR-4722-3p	9.31572	170.951	17.8177	8.06991	14.4725	14.7242	-5.31552	-2.41021	0.0494428	0.258924
hsa-miR-297	35.0018	146.983	14.3622	19.4527	2.39919	14.4914	-5.40356	-2.43391	0.049326	0.258924
hsa-miR-4313	6.42151	54.7472	10.2587	5.35163	4.87577	5.00505	-4.69792	-2.23202	0.0517146	0.269639
hsa-miR-139-5p	1413.28	204.501	1733.72	10619.2	1757.13	5904.68	5.45468	2.4475	0.0525434	0.272769
hsa-miR-7515	5.24574	114.602	13.0663	6.62582	10.2933	8.20596	-5.29175	-2.40374	0.0530011	0.273954
hsa-miR-134-3p	4.79353	39.7919	8.96285	6.71077	1.93483	3.66649	-4.36175	-2.12491	0.0535072	0.275378
hsa-miR-4324	88.8159	50.3073	29.6962	220.946	63.2302	516.917	4.74446	2.24624	0.0538578	0.275993
hsa-miR-335-5p	50.2868	6.37605	33.3677	175.075	3.86965	294.425	5.2585	2.39465	0.0541903	0.27651
hsa-miR-758-3p	92.8859	19.1281	17.8177	7.22045	12.6151	10.4757	-4.2777	-2.09683	0.0552956	0.279758
hsa-miR-6513-5p	93.6998	0.701031	13.6063	10.2785	2.63137	11.3487	-4.44716	-2.15289	0.0552745	0.279758
hsa-miR-7978	25.5956	70.2366	46.866	8.4097	11.609	15.6553	-3.99734	-1.99904	0.0564602	0.281566
hsa-miR-7108-3p	9.94883	64.2946	16.1979	5.01184	12.2281	5.00505	-4.07301	-2.02609	0.0564065	0.281566
hsa-miR-4503	7.4164	62.325	17.4938	4.92689	10.9898	5.23784	-4.13026	-2.04623	0.056832	0.281566
hsa-miR-6787-3p	5.87885	64.6618	4.64341	9.34411	2.63137	4.71406	-4.51153	-2.17362	0.0564005	0.281566
hsa-miR-6850-3p	9.22527	213.447	23.649	26.7581	6.7332	14.1422	-5.17279	-2.37094	0.056689	0.281566
hsa-miR-208a-3p	7.77817	8.1787	14.3622	56.9141	4.64359	70.9437	4.37125	2.12805	0.0585788	0.287019
hsa-miR-7152-3p	12.7526	3.30486	8.31493	15.4603	58.8188	19.7292	3.86925	1.95205	0.0587194	0.287019
hsa-miR-3152-5p	202.956	27.7408	25.0528	20.7269	23.6049	14.8406	-4.32084	-2.11131	0.0588941	0.287019
hsa-miR-1227-5p	8.23039	34.0835	3.8875	3.99248	5.95927	0.523784	-4.42488	-2.14564	0.0582178	0.287019
hsa-miR-5186	4.79353	84.491	9.3948	3.90754	9.51935	8.20596	-4.56291	-2.18995	0.0594083	0.28718
hsa-miR-4781-5p	4.06997	110.563	13.2823	5.18173	13.9308	5.93622	-5.10873	-2.35297	0.059178	0.28718
hsa-miR-7848-3p	7.59729	5.07413	8.09896	3.22797	102.933	2.21153	5.21247	2.38197	0.0597389	0.287614
hsa-miR-887-5p	19.2645	28.1748	7.45105	9.08927	1.93483	1.62955	-4.35674	-2.12325	0.0606309	0.290736
hsa-miR-6869-3p	34.8209	45.1331	15.0101	3.31291	12.6925	6.751	-4.17519	-2.06184	0.0611654	0.292126
hsa-miR-4524a-5p	142.268	216.251	54.425	18.0086	24.3014	47.839	-4.57879	-2.19497	0.0614143	0.292146
hsa-miR-12114	4.52219	15.2558	7.12709	8.4097	127.234	1.92054	5.0993	2.3503	0.0632449	0.29821
hsa-miR-6773-3p	74.2544	8.57929	34.9875	264.268	24.0693	296.695	4.96663	2.31227	0.0638149	0.29821
hsa-miR-4505	12.4813	38.6235	19.9774	9.59895	4.17923	5.99442	-3.61037	-1.85215	0.0639377	0.29821
hsa-miR-190a-5p	118.572	5.57487	169.322	37.0367	10.2933	20.0784	-4.35188	-2.12164	0.0635999	0.29821
hsa-miR-4447	7.05462	29.6102	5.93924	1.95377	5.6497	2.21153	-4.3571	-2.12337	0.0636636	0.29821
hsa-miR-139-3p	36.0871	23.9352	48.8097	249.063	41.7923	192.694	4.44549	2.15234	0.0644284	0.299329
hsa-miR-221-5p	5.60752	1.23515	3.56354	0.849465	21.6701	17.2849	3.83332	1.93859	0.0650722	0.300589
hsa-miR-12113	4.16042	8.44576	2.69965	25.4839	6.7332	15.5971	3.07924	1.62257	0.0652032	0.300589
hsa-miR-6887-3p	13.1144	244.76	12.2024	11.3828	22.444	19.1472	-5.09861	-2.3501	0.0660926	0.303517
hsa-miR-3654	1.53755	7.21061	1.72778	19.8775	4.72098	12.2798	3.45246	1.78763	0.066577	0.304571
hsa-miR-129-1-3p	11.9386	8.27884	30.992	13.3366	16.0204	197.641	4.43529	2.14903	0.0669572	0.305141
hsa-miR-145-3p	10.1297	11.6839	10.2587	4.67206	113.923	21.3588	4.35781	2.1236	0.0682628	0.306913
hsa-miR-12118	9.22527	7.94502	1.72778	61.2464	0.773931	12.629	3.93726	1.97719	0.0686357	0.306913
hsa-miR-4634	2.8942	30.6451	4.31945	2.46345	1.23829	4.94685	-4.37496	-2.12927	0.0687962	0.306913
hsa-miR-548u	3.07509	50.9416	8.31493	6.88066	5.80448	1.16397	-4.51148	-2.1736	0.067756	0.306913
hsa-miR-6786-5p	0.361775	42.4625	1.40382	6.20109	2.01222	0.34919	-5.17185	-2.37068	0.0688884	0.306913
hsa-miR-300	185.41	0.567501	66.3035	0	35.833	0.232793	-6.99157	-2.80562	0.068701	0.306913
hsa-miR-518d-5p	8.0495	91.3344	14.5781	134.47	344.864	49.3521	4.63269	2.21185	0.0694359	0.308202
hsa-miR-501-5p	7.14507	14.4546	4.96736	2.71829	2.78615	4.36487	-2.70932	-1.43793	0.0703259	0.310401
hsa-miR-6075	8.95394	50.541	2.26771	4.41722	6.34623	3.4337	-4.35809	-2.1237	0.0704512	0.310401
hsa-miR-6715b-3p	4.43175	1.53559	6.37118	3.82259	35.6782	5.06325	3.62284	1.85712	0.0712212	0.31264
hsa-miR-3182	6.24063	10.6824	10.2587	4.67206	66.8676	36.8395	3.98052	1.99296	0.0716539	0.313387
hsa-miR-4691-3p	4.97441	24.8032	2.69965	13.9312	105.487	19.4964	4.25796	2.09016	0.0729853	0.315741
hsa-miR-515-5p	24.6912	105.756	18.5736	9.85379	13.002	13.211	-4.13572	-2.04814	0.0728509	0.315741
hsa-miR-615-5p	6.51196	123.615	4.21146	5.43657	13.5438	7.91497	-4.99594	-2.32076	0.0728033	0.315741
hsa-miR-374a-5p	696.599	13.2194	336.161	64.8141	35.0591	109.529	-4.99405	-2.32021	0.073732	0.317819
hsa-miR-2114-3p	5.78841	14.6549	10.1507	12.0624	104.79	7.15839	4.04381	2.01572	0.0742522	0.318911
hsa-miR-6805-5p	39.2526	1.63574	8.74688	3.31291	3.01833	258.691	5.33848	2.41643	0.0751947	0.321801
hsa-miR-548c-3p	4.61264	8.1787	5.61528	19.113	23.9145	14.2586	3.03924	1.60371	0.0757281	0.322926
hsa-miR-3165	43.5939	94.3722	34.7715	243.032	162.912	319.625	4.19183	2.06758	0.0765641	0.324176
hsa-miR-6789-5p	4.34131	109.561	5.93924	1.61398	18.6517	4.24847	-4.88953	-2.28969	0.076373	0.324176
hsa-miR-6856-3p	3.7082	70.27	6.2632	2.54839	9.51935	7.97316	-4.00522	-2.00188	0.0770843	0.324255
hsa-miR-15b-3p	243.384	21.1311	360.782	68.0421	34.053	48.0718	-4.16297	-2.05761	0.0771591	0.324255
hsa-miR-371a-3p	3.25598	94.4389	9.3948	11.8925	5.03055	7.10019	-4.46122	-2.15744	0.0773975	0.324255
hsa-miR-551b-5p	3.25598	3.40501	3.77952	1.61398	11.8411	21.5916	3.35409	1.74592	0.0781729	0.326358
hsa-miR-891a-3p	7.23551	4.90722	1.51181	3.73764	31.112	5.76163	2.96092	1.56605	0.0799498	0.332613
hsa-miR-18a-5p	199.881	5.44134	136.063	45.4464	15.943	25.9564	-3.90729	-1.96617	0.0805602	0.332834
hsa-miR-450b-3p	37.896	79.7506	10.1507	5.52152	23.5275	2.50253	-4.0537	-2.01924	0.0805299	0.332834
hsa-let-7a-2-3p	68.5565	0.968091	27.9684	14.9506	8.04888	2.79352	-3.77839	-1.91777	0.0815216	0.335644
hsa-miR-3606-3p	51.9148	24.002	55.9368	118.33	314.913	96.0272	4.01746	2.00628	0.0818469	0.335826
hsa-miR-548av-5p	50.2868	1.135	53.1292	10.3635	17.1039	4.19028	-3.30029	-1.72259	0.0830741	0.337379
hsa-miR-3679-3p	25.5956	69.5022	22.7851	8.06991	17.3361	8.14776	-3.52129	-1.8161	0.0836597	0.337379
hsa-miR-4497	4.06997	44.9328	9.28681	1.35914	10.2933	3.84109	-3.76616	-1.91309	0.0833645	0.337379
hsa-miR-7976	46.1264	0.667649	18.2497	3.05807	7.35234	6.8092	-3.76915	-1.91424	0.083261	0.337379
hsa-miR-1178-3p	61.6827	0.200295	3.02361	1.95377	2.16701	11.1741	-4.23369	-2.08191	0.0834586	0.337379
hsa-miR-3150a-5p	8.95394	272.1	25.8087	7.90002	11.9959	47.0242	-4.58425	-2.19669	0.0839209	0.337379
hsa-miR-4284	10.8533	0.767796	4.21146	16.1398	3.01833	34.628	3.40427	1.76735	0.0845598	0.337673
hsa-miR-4800-3p	17.6366	6.8434	41.7906	11.128	9.67414	2.96811	-2.7852	-1.47778	0.0844861	0.337673
hsa-miR-194-5p	2033.9	14.2543	246.208	65.6636	74.2974	308.509	-5.11551	-2.35488	0.0848879	0.337854
hsa-miR-4709-3p	7.59729	89.9323	12.4184	8.91938	564.118	7.27478	5.27395	2.39888	0.0869004	0.338346
hsa-miR-126-3p	74842.4	8649.29	90727.9	458095	37237.8	210494	4.05137	2.01841	0.0867611	0.338346
hsa-miR-6863	3.52731	19.0948	8.31493	2.63334	6.11405	0.872974	-3.23226	-1.69254	0.0857471	0.338346
hsa-miR-451a	1.32961e+06	94491.6	1.80832e+06	426415	224499	170906	-3.93325	-1.97572	0.0869952	0.338346
hsa-miR-3124-5p	8.23039	88.8974	28.8323	3.6527	13.776	13.793	-4.03396	-2.0122	0.0859426	0.338346
hsa-miR-1537-3p	671.365	83.0221	972.739	248.044	109.589	68.1502	-4.05623	-2.02014	0.086869	0.338346
hsa-miR-182-3p	3.88909	107.258	15.766	5.52152	9.82892	14.8406	-4.20349	-2.07159	0.0862255	0.338346
hsa-miR-371b-5p	5.9693	4.03928	7.775	1.01936	80.1019	0.232793	4.56899	2.19188	0.0892754	0.340509
hsa-miR-5579-3p	58.6076	2.77074	64.0358	385.147	20.3544	136.242	4.32045	2.11118	0.0880621	0.340509
hsa-miR-4643	14.9232	32.7816	14.9021	42.9829	106.261	74.843	3.56235	1.83283	0.0888182	0.340509
hsa-miR-378g	3.7082	8.87973	1.61979	12.9968	0.696538	35.9083	3.46977	1.79484	0.0898946	0.340509
hsa-miR-3667-3p	6.87373	6.77663	10.0427	15.3753	55.3361	6.92559	3.27607	1.71197	0.0895705	0.340509
hsa-miR-124-3p	3.97953	4.07266	3.99549	15.6301	3.09572	19.3218	3.15204	1.65628	0.088666	0.340509
hsa-miR-146a-3p	6.15018	10.5822	5.18334	7.81507	24.998	33.755	3.0169	1.59307	0.0901939	0.340509
hsa-miR-6799-5p	6.05974	21.4315	10.9066	4.07743	5.26273	3.20091	-3.08739	-1.62639	0.0890933	0.340509
hsa-miR-655-5p	29.0325	3.73883	19.9774	1.01936	6.81059	7.85677	-3.34866	-1.74358	0.0904032	0.340509
hsa-miR-186-5p	505.491	10.4821	143.622	29.9012	8.20367	109.704	-4.46105	-2.15738	0.0885763	0.340509
hsa-miR-3179	21.4352	4.40648	4.64341	1.61398	5.49491	124.661	4.32097	2.11136	0.0936997	0.340567
hsa-miR-483-5p	15.5563	0.968091	13.4983	7.05056	112.452	6.92559	4.21299	2.07484	0.0911285	0.340567
hsa-miR-3191-5p	5.1553	10.4821	6.80313	5.60647	4.25662	69.4305	3.52568	1.8179	0.0928376	0.340567
hsa-miR-6888-5p	18.6314	2.87089	1.18785	55.8948	7.19756	10.5339	3.24265	1.69717	0.0946245	0.340567
hsa-miR-1843	10.3106	4.87384	11.1226	41.9636	14.9369	21.8244	3.00942	1.58948	0.0910379	0.340567
hsa-miR-1287-5p	10.8533	10.5489	23.325	6.88066	5.5723	4.36487	-2.64978	-1.40587	0.0929002	0.340567
hsa-miR-6840-5p	7.59729	23.134	11.3385	1.52904	8.59063	3.60829	-3.07074	-1.61859	0.0943255	0.340567
hsa-miR-4288	24.8721	22.6333	14.6861	3.82259	7.35234	8.26416	-3.18675	-1.67209	0.0934624	0.340567
hsa-miR-548aj-5p	6.33107	39.8252	6.58716	8.23981	4.56619	1.39676	-3.72874	-1.89869	0.0934365	0.340567
hsa-miR-718	4.52219	63.6603	3.45556	7.1355	5.80448	6.11082	-3.7654	-1.9128	0.0939064	0.340567
hsa-miR-217-3p	20.983	117.439	41.5747	14.7807	18.8065	12.2798	-3.9294	-1.97431	0.0939936	0.340567
hsa-miR-3615	364.941	41.0938	179.797	28.3721	66.3259	52.3203	-3.98324	-1.99394	0.094697	0.340567
hsa-miR-3144-5p	4.34131	36.4202	0.647917	1.69893	1.0835	6.98379	-4.23376	-2.08194	0.0937165	0.340567
hsa-miR-154-3p	54.6281	0.400589	37.1472	0.0849465	17.6456	2.96811	-4.44879	-2.15341	0.0914358	0.340567
hsa-miR-219a-1-3p	1122.41	11.083	30.5601	196.991	5.03055	12.6872	-5.42136	-2.43865	0.0946548	0.340567
hsa-miR-3202	133.947	239.92	64.3598	46.4657	5.95927	2340.68	5.46019	2.44895	0.0956214	0.342381
hsa-miR-6516-5p	82.4848	3.70545	8.31493	4.58711	13.0794	11.1741	-3.27284	-1.71054	0.095775	0.342381
hsa-miR-580-3p	16.7321	13.5199	5.72327	4.24732	3.01833	6.40181	-2.62799	-1.39396	0.0976063	0.346851
hsa-miR-646	60.7783	1.96956	19.3295	10.7882	0.386965	12.2216	-3.50343	-1.80877	0.0973676	0.346851
hsa-miR-10397-5p	2.98465	6.00884	6.37118	14.6108	10.2159	18.5653	2.80861	1.48986	0.0980171	0.347277
hsa-miR-6890-3p	10.4915	9.41385	11.6625	55.0453	3.4053	47.0824	3.34157	1.74053	0.0994915	0.349391
hsa-miR-148b-5p	2.80376	9.84782	12.2024	20.0474	28.7902	22.7555	2.87515	1.52364	0.0993784	0.349391
hsa-miR-6085	12.2099	14.755	18.7896	3.4828	2.01222	10.2429	-2.88739	-1.52976	0.0990056	0.349391
hsa-miR-7706	8.13995	29.4433	7.55903	2.29355	8.90021	0.232793	-3.95788	-1.98473	0.100199	0.350843
hsa-miR-3135a	17.6366	5.77516	26.6726	98.7927	7.66192	74.0864	3.60838	1.85135	0.102637	0.354945
hsa-miR-431-3p	12.843	10.4153	20.6254	4.92689	3.71487	7.33298	-2.71063	-1.43863	0.101796	0.354945
hsa-miR-4632-3p	8.0495	78.649	8.53091	14.356	8.12628	3.95748	-3.60866	-1.85146	0.10306	0.354945
hsa-miR-1199-3p	2.2611	39.6917	4.21146	5.01184	3.71487	4.07388	-3.61509	-1.85403	0.103096	0.354945
hsa-miR-330-3p	35.0922	211.678	54.425	45.1066	22.6762	12.5708	-3.7516	-1.90751	0.103154	0.354945
hsa-miR-648	1.53755	38.7904	0.431945	4.07743	3.63748	2.03694	-4.18586	-2.06552	0.1028	0.354945
hsa-miR-4707-5p	452.4	54.0128	283.572	972.722	618.99	1696.48	4.16285	2.05757	0.104645	0.359042
hsa-miR-1827	68.2851	73.5749	61.4441	290.772	17.4908	491.601	3.93361	1.97585	0.106701	0.361487
hsa-miR-365a-5p	8.59217	1.00147	7.34306	28.627	9.59674	13.793	3.08691	1.62617	0.10783	0.361487
hsa-miR-1468-5p	12.3908	2.50368	9.71875	26.0786	12.9246	28.4008	2.75526	1.46219	0.106225	0.361487
hsa-miR-421	55.8039	4.30633	27.7524	7.64518	8.12628	14.375	-2.90784	-1.53995	0.106623	0.361487
hsa-miR-374a-3p	27.1332	21.999	35.7434	17.6689	5.80448	2.96811	-3.215	-1.68482	0.108083	0.361487
hsa-miR-6716-5p	1.98977	34.0501	5.93924	3.31291	5.72709	3.08451	-3.47226	-1.79587	0.10683	0.361487
hsa-miR-659-3p	209.016	30.1443	18.3576	6.20109	45.1202	21.6498	-3.52775	-1.81875	0.106873	0.361487
hsa-miR-4783-3p	0.994883	33.6161	11.6625	2.12366	8.9776	1.28036	-3.74215	-1.90387	0.10797	0.361487
hsa-miR-4251	5.60752	135.933	15.874	4.24732	23.5275	8.49695	-4.34116	-2.11808	0.107538	0.361487
hsa-miR-4540	7.32595	7.07708	7.775	1.2742	82.2689	3.95748	3.93975	1.9781	0.110521	0.365465
hsa-miR-4421	421.468	724.299	437.236	465.422	3305.92	2297.38	3.83342	1.93863	0.110897	0.365465
hsa-miR-12125	3.88909	3.6053	7.99098	16.9043	5.72709	20.1366	2.78306	1.47667	0.112154	0.365465
hsa-miR-3672	15.8277	12.1178	7.88299	5.43657	2.70876	5.99442	-2.52967	-1.33895	0.112415	0.365465
hsa-miR-6804-5p	9.40616	15.3893	5.29132	2.46345	4.87577	3.95748	-2.68252	-1.42359	0.111107	0.365465
hsa-miR-3134	9.58705	15.89	8.63889	3.4828	6.19145	3.20091	-2.68346	-1.42409	0.112169	0.365465
hsa-miR-3606-5p	1.17577	20.5302	7.99098	6.28604	0.928717	2.26973	-3.14216	-1.65175	0.112463	0.365465
hsa-miR-576-5p	183.239	12.7187	310.46	49.7786	74.3748	19.4964	-3.52477	-1.81753	0.112639	0.365465
hsa-miR-10400-5p	27.9472	255.209	53.5611	25.5689	47.6741	18.6234	-3.66712	-1.87465	0.111627	0.365465
hsa-miR-921	8.13995	157.265	18.0337	11.8925	17.4134	17.9833	-3.88043	-1.95622	0.112182	0.365465
hsa-miR-12133	871.336	24.5695	483.13	201.323	58.5866	95.1542	-3.88368	-1.95742	0.110671	0.365465
hsa-miR-4662a-3p	10.3106	13.8537	39.6309	5.86131	7.04277	8.96253	-2.90339	-1.53774	0.113262	0.365655
hsa-miR-1185-5p	30.1178	3.53854	40.8188	0.0849465	16.8717	4.13208	-3.52727	-1.81855	0.11331	0.365655
hsa-miR-222-5p	6.05974	8.27884	3.02361	17.9237	4.72098	25.9564	2.77876	1.47444	0.114861	0.36966
hsa-miR-5000-5p	2.98465	6.87678	4.64341	6.11614	27.2424	5.00505	2.62538	1.39253	0.115566	0.369857
hsa-miR-433-5p	4.06997	68.1002	7.23507	2.88818	16.7169	3.3173	-3.46781	-1.79403	0.115693	0.369857
hsa-miR-6717-5p	8.95394	194.353	13.8222	21.7463	14.6273	19.6128	-3.87965	-1.95593	0.115851	0.369857
hsa-miR-376c-3p	271.422	30.6451	444.579	7.56023	154.941	11.6397	-4.28709	-2.1	0.117034	0.372638
hsa-miR-210-3p	38.71	8.41237	18.3576	14.1861	4.17923	7.27478	-2.55118	-1.35116	0.117933	0.374499
hsa-miR-4640-3p	12.7526	5.37457	6.37118	4.58711	72.5947	10.5339	3.57893	1.83953	0.118463	0.375121
hsa-miR-1249-3p	8.32084	11.1497	8.09896	35.6775	5.34012	36.0247	2.78727	1.47885	0.119316	0.375121
hsa-miR-660-3p	13.2952	9.01326	11.5545	47.655	11.4542	33.464	2.73665	1.45241	0.119699	0.375121
hsa-miR-135a-5p	5.9693	4.87384	15.0101	37.9711	7.8941	23.9195	2.70875	1.43762	0.11958	0.375121
hsa-miR-10398-3p	18.9028	369.711	19.8695	24.2097	29.4094	42.6011	-4.24554	-2.08595	0.11917	0.375121
hsa-miR-4453	7.14507	35.6524	15.226	106.268	12.5377	67.7428	3.20743	1.68142	0.120057	0.375258
hsa-miR-374c-5p	6.78329	14.6549	12.0945	47.0603	3.09572	61.5156	3.32489	1.73331	0.120383	0.375295
hsa-miR-6752-5p	3.79864	32.6814	2.59167	8.66454	1.23829	0.581983	-3.73896	-1.90264	0.121482	0.377733
hsa-miR-100-3p	14.9232	56.1159	25.5927	18.2635	4.10183	7.62397	-3.22939	-1.69126	0.122359	0.379473
hsa-miR-4659a-5p	39.8857	27.9077	7.23507	12.2323	9.67414	0.756578	-3.31487	-1.72895	0.123627	0.381422
hsa-miR-4316	2.2611	93.9716	11.7705	5.60647	9.82892	13.9676	-3.67379	-1.87727	0.123599	0.381422
hsa-miR-1288-5p	10.401	145.08	16.1979	12.9119	15.4012	17.3431	-3.76211	-1.91154	0.124131	0.381991
hsa-miR-4502	18.541	191.315	26.9965	9.25916	38.8513	16.9939	-3.63945	-1.86372	0.124829	0.38315
hsa-miR-3925-5p	13.2048	5.90869	11.4465	12.9968	79.1731	8.08956	3.28218	1.71466	0.125646	0.38467
hsa-miR-1470	8.41128	190.08	13.0663	21.6613	5.72709	28.5172	-3.78462	-1.92015	0.126137	0.385184
hsa-miR-6751-5p	15.1946	22.5999	1.94375	6.0312	6.50102	1.33856	-2.87548	-1.5238	0.12753	0.38798
hsa-miR-6881-5p	55.1708	108.593	115.437	10.4484	45.5845	20.7768	-3.63446	-1.86174	0.127925	0.38798
hsa-miR-6505-5p	13.7475	118.808	7.66702	6.79572	20.664	9.89371	-3.75639	-1.90935	0.128027	0.38798
hsa-miR-3938	2.8942	17.5925	4.53542	2.46345	1.62526	5.17965	-2.70577	-1.43604	0.129618	0.388853
hsa-miR-17-3p	45.3124	10.7158	18.1417	8.32475	2.01222	15.4225	-2.87176	-1.52194	0.129404	0.388853
hsa-miR-7705	10.5819	65.1291	25.2688	3.14302	13.389	15.9463	-3.10894	-1.63642	0.129057	0.388853
hsa-miR-3187-3p	26.7714	450.129	59.8243	28.1173	74.22	25.3744	-4.20341	-2.07156	0.12883	0.388853
hsa-miR-6802-5p	10.7628	15.4895	13.6063	9.6839	129.788	3.4919	3.58275	1.84107	0.131969	0.389925
hsa-miR-3130-5p	33.4642	9.61414	11.4465	23.6151	15.3238	148.929	3.44661	1.78518	0.130612	0.389925
hsa-miR-6861-3p	0.361775	12.6519	0.971875	27.013	1.93483	15.9463	3.18257	1.67019	0.133366	0.389925
hsa-miR-6510-5p	4.06997	19.729	10.3667	3.73764	40.2444	58.3729	2.98812	1.57924	0.132716	0.389925
hsa-miR-5690	5.33619	5.04075	8.53091	14.9506	0.309572	37.8871	2.81024	1.49069	0.131481	0.389925
hsa-miR-4427	5.60752	18.3937	3.56354	2.71829	6.26884	0.34919	-2.96673	-1.56887	0.130635	0.389925
hsa-miR-296-5p	16.4608	52.9779	20.5174	6.54088	13.6986	9.07893	-3.07585	-1.62099	0.132148	0.389925
hsa-miR-3960	35.1827	96.2082	49.4577	17.0742	22.9858	16.9939	-3.17638	-1.66738	0.131416	0.389925
hsa-miR-223-3p	57.0701	4.33972	102.695	3.6527	35.3686	10.0683	-3.34066	-1.74013	0.133495	0.389925
hsa-miR-942-5p	340.34	19.8292	328.926	47.8249	104.094	41.088	-3.56971	-1.83581	0.133371	0.389925
hsa-miR-1181	1.4471	166.378	9.07084	6.37098	31.5764	4.77226	-4.14175	-2.05024	0.133567	0.389925
hsa-miR-345-3p	4.34131	21.4983	9.28681	15.1205	27.8615	58.4893	2.87541	1.52377	0.134791	0.392536
hsa-miR-4506	1.4471	32.1139	6.47917	5.77636	5.41752	0.698379	-3.37756	-1.75598	0.135249	0.392914
hsa-miR-6512-3p	8.13995	1.23515	5.39931	8.49465	19.1161	13.1528	2.78204	1.47614	0.135604	0.392988
hsa-miR-6815-5p	9.31572	31.4796	9.3948	9.76884	133.503	19.3218	3.23215	1.69249	0.137572	0.396923
hsa-miR-3939	4.79353	19.8626	7.66702	3.05807	3.63748	5.41244	-2.6802	-1.42234	0.137626	0.396923
hsa-miR-6790-3p	9.49661	18.9278	14.4701	30.9205	77.7801	23.3957	3.06902	1.61778	0.138751	0.399202
hsa-miR-4450	53.5428	23.8684	11.3385	32.8743	45.275	200.493	3.1392	1.6504	0.139653	0.399876
hsa-miR-4529-3p	47.6639	20.597	10.5826	12.1473	9.59674	5.81983	-2.86329	-1.51767	0.139655	0.399876
hsa-miR-7845-5p	8.32084	44.6323	10.9066	7.90002	6.34623	7.79857	-2.90644	-1.53925	0.140568	0.401525
hsa-miR-19a-3p	385.291	43.9981	396.201	89.3637	61.6049	89.1598	-3.43684	-1.78108	0.141598	0.403504
hsa-miR-5004-3p	100.121	20.2965	25.7007	11.2129	17.5682	20.253	-2.97595	-1.57335	0.143841	0.408919
hsa-miR-6765-5p	8.50172	20.2298	3.56354	5.69141	3.3279	3.2591	-2.65298	-1.40761	0.144615	0.409832
hsa-miR-486-5p	4325.84	211.444	5887.3	536.777	1727.96	555.328	-3.69654	-1.88618	0.144849	0.409832
hsa-miR-4694-3p	10.8533	99.7801	32.9358	13.1667	15.7882	15.7717	-3.21286	-1.68386	0.145656	0.411143
hsa-miR-4474-3p	24.4198	19.0948	17.4938	11.2979	6.11405	7.39118	-2.46857	-1.30368	0.146077	0.411357
hsa-miR-539-5p	66.2049	2.63721	21.0573	4.58711	374.583	3.20091	4.25276	2.0884	0.147167	0.412482
hsa-miR-1271-3p	13.2952	7.9784	16.3059	3.31291	7.42974	4.48127	-2.44789	-1.29154	0.147016	0.412482
hsa-miR-3934-5p	7.50684	38.4232	7.99098	3.39786	2.16701	11.9306	-3.08036	-1.6231	0.147561	0.412619
hsa-miR-6511a-3p	7.4164	8.04517	6.37118	6.20109	46.5133	5.47064	2.65858	1.41066	0.150681	0.420358
hsa-miR-3689d	13.3857	35.8194	9.28681	10.8731	2.08961	5.93622	-3.10469	-1.63445	0.151719	0.422268
hsa-miR-214-5p	1032.05	988.12	749.316	596.324	5145.48	3644.55	3.38914	1.76092	0.152756	0.423428
hsa-miR-4712-3p	108.442	4858.65	364.669	254.5	745.063	419.551	-3.75714	-1.90963	0.152845	0.423428
hsa-miR-185-5p	2469.84	83.9568	1936.19	378.946	657.3	152.77	-3.77616	-1.91692	0.153818	0.425136
hsa-miR-6768-5p	21.4352	23.568	32.6118	6.96561	250.057	7.91497	3.41235	1.77077	0.158564	0.425301
hsa-miR-125b-1-3p	77.7817	10.1483	94.9198	287.544	157.031	166.389	3.34341	1.74132	0.155552	0.425301
hsa-miR-1203	2.62287	25.1036	7.99098	67.1077	7.50713	32.591	2.98984	1.58007	0.155097	0.425301
hsa-miR-12131	12.2099	4.3731	1.51181	3.56775	38.0774	7.91497	2.7347	1.45138	0.155936	0.425301
hsa-miR-508-5p	3.52731	14.2543	2.15972	9.6839	34.1304	9.77731	2.66179	1.4124	0.159392	0.425301
hsa-miR-4451	15.1041	4.23957	12.5264	39.2453	9.05499	34.6862	2.6119	1.3851	0.156562	0.425301
hsa-miR-548n	10.3106	4.60678	13.8222	15.6301	51.2342	7.74037	2.60118	1.37917	0.155917	0.425301
hsa-miR-548av-3p	13.9284	18.594	25.5927	7.64518	1.23829	13.6766	-2.56946	-1.36146	0.156401	0.425301
hsa-miR-6724-5p	15.4659	11.4836	2.91563	5.09679	1.62526	4.88866	-2.57413	-1.36409	0.158449	0.425301
hsa-miR-1277-3p	13.0239	4.54001	39.6309	12.8269	4.72098	3.95748	-2.65594	-1.40922	0.159577	0.425301
hsa-miR-346	6.69285	79.9176	18.8976	10.1936	9.75153	15.3643	-2.99074	-1.5805	0.159337	0.425301
hsa-miR-6839-3p	22.5205	91.9019	11.6625	13.5914	20.1996	7.97316	-3.02415	-1.59653	0.157879	0.425301
hsa-miR-4520-2-3p	47.483	0.801179	0.863889	1.86882	3.4053	10.6503	-3.07952	-1.62271	0.155275	0.425301
hsa-miR-92a-2-5p	5.87885	60.2219	9.17882	17.1592	5.41752	0.581983	-3.25611	-1.70315	0.158027	0.425301
hsa-miR-3664-3p	15.0137	128.522	22.0292	21.9162	11.222	16.0045	-3.37244	-1.75379	0.1579	0.425301
hsa-miR-4713-3p	9.40616	176.727	10.9066	9.514	40.7862	6.751	-3.45525	-1.78879	0.158006	0.425301
hsa-miR-1915-3p	6.6024	6.54296	15.982	4.07743	76.6966	10.2429	3.12557	1.64412	0.161455	0.425949
hsa-miR-6069	7.50684	4.10604	8.85487	4.33227	56.11	0.756578	2.98861	1.57948	0.160978	0.425949
hsa-miR-203a-3p	12.7526	8.94649	8.63889	49.9485	13.6212	15.4807	2.60249	1.37989	0.160683	0.425949
hsa-miR-4707-3p	6.05974	21.3648	10.4747	1.35914	11.6864	0.756578	-2.75097	-1.45994	0.161604	0.425949
hsa-miR-518c-5p	6.6024	52.8778	8.96285	4.67206	10.9124	6.751	-3.07058	-1.61851	0.160783	0.425949
hsa-miR-4651	2.8942	21.2646	6.58716	4.92689	0.464359	5.87803	-2.73163	-1.44976	0.163203	0.428274
hsa-miR-7704	3.7082	150.889	9.93473	25.6538	12.9246	8.38055	-3.50598	-1.80982	0.162949	0.428274
hsa-miR-151a-3p	842.304	46.8689	150.749	1254.57	95.4257	2527.9	3.72906	1.89881	0.165101	0.430415
hsa-miR-6873-5p	6.87373	93.9716	15.1181	6.71077	19.8126	10.8249	-3.10774	-1.63587	0.164891	0.430415
hsa-miR-3667-5p	9.40616	120.778	13.2823	8.23981	22.9084	12.2798	-3.30593	-1.72506	0.164953	0.430415
hsa-miR-6763-3p	17.4557	16.5243	18.6816	25.9087	33.279	81.2448	2.66958	1.41661	0.166841	0.434004
hsa-miR-6882-5p	7.4164	9.64752	10.4747	5.43657	49.7638	25.7236	2.93575	1.55373	0.167769	0.434614
hsa-miR-466	2.44198	13.3196	8.31493	20.3871	8.04888	33.2312	2.54842	1.3496	0.167803	0.434614
hsa-miR-326	36.4489	5.30781	36.0674	119.35	13.6212	74.4356	2.66703	1.41523	0.168584	0.435691
hsa-miR-483-3p	6.6024	2.4703	9.07084	15.8	3.3279	26.713	2.53861	1.34404	0.169383	0.43587
hsa-miR-11399	9.76794	5.44134	14.7941	27.5227	9.67414	35.4428	2.43324	1.28288	0.169145	0.43587
hsa-miR-18a-3p	77.42	47.0692	28.2924	21.6613	8.35845	25.6072	-2.74473	-1.45666	0.170027	0.436586
hsa-miR-877-5p	30.9318	50.4742	42.1146	66.9378	264.53	52.9604	3.11012	1.63697	0.17105	0.438269
hsa-miR-605-5p	10.0393	16.2572	12.9583	3.05807	11.0672	1.97874	-2.44428	-1.28941	0.173197	0.440931
hsa-miR-520g-3p	49.4728	0.667649	36.9313	9.42906	12.3829	10.8831	-2.66015	-1.41151	0.172717	0.440931
hsa-miR-133a-3p	109.98	8.51252	10.7986	14.271	17.2587	14.5496	-2.80411	-1.48754	0.172982	0.440931
hsa-miR-4714-5p	7.05462	6.67649	14.3622	11.128	33.5112	22.4063	2.3989	1.26237	0.174896	0.441996
hsa-miR-323b-5p	53.995	8.81296	32.0719	6.79572	24.3788	7.56578	-2.44658	-1.29076	0.175095	0.441996
hsa-miR-4804-5p	10.7628	18.594	5.72327	9.17422	0.928717	4.07388	-2.48379	-1.31254	0.174231	0.441996
hsa-miR-6772-3p	46.3977	4.43986	5.50729	5.26668	3.63748	12.6872	-2.60326	-1.38032	0.174523	0.441996
hsa-miR-185-3p	9.76794	10.6156	18.4656	6.45593	6.26884	4.59766	-2.23275	-1.15882	0.175666	0.442501
hsa-miR-4767	10.5819	50.8748	6.80313	13.9312	0.154786	7.04199	-3.23317	-1.69295	0.176188	0.442882
hsa-miR-125a-5p	14870.7	1107.93	5249.86	22425.4	4595.76	39808.1	3.1481	1.65448	0.177256	0.443018
hsa-miR-4659a-3p	22.7014	9.14679	20.6254	8.15486	11.4542	4.07388	-2.21228	-1.14553	0.177727	0.443018
hsa-miR-4492	160.628	72.273	191.351	48.7593	73.0591	19.4382	-3.00319	-1.5865	0.177349	0.443018
hsa-miR-325	19.4454	214.582	46.0021	23.4452	37.5357	28.9245	-3.11622	-1.63979	0.177456	0.443018
hsa-miR-3648	8.0495	27.2735	11.3385	27.013	57.5805	45.9184	2.77991	1.47504	0.178238	0.443367
hsa-miR-6895-3p	2.17065	30.6117	4.10347	14.4409	5.03055	99.6354	3.21988	1.68701	0.180004	0.445482
hsa-miR-369-3p	23.5154	0.834561	70.515	13.0818	7.19756	17.6923	-2.49512	-1.31911	0.180208	0.445482
hsa-miR-486-3p	143.806	3.40501	35.0955	18.6033	30.6477	11.8724	-2.98155	-1.57606	0.179747	0.445482
hsa-miR-6830-5p	14.3806	27.2735	20.1934	100.067	9.51935	65.9968	2.8353	1.5035	0.180744	0.445885
hsa-miR-6757-5p	7.77817	5.60825	11.7705	1.95377	85.6742	0.116397	3.48512	1.80121	0.181432	0.44666
hsa-miR-365a-3p	390.627	39.191	123.86	537.711	196.965	1111.53	3.33471	1.73756	0.181896	0.44688
hsa-miR-6741-3p	36.6298	158.5	36.4993	24.8044	20.277	34.2206	-2.92284	-1.54737	0.182296	0.446944
hsa-miR-1260a	472.66	110.863	646.081	915.808	1285.11	1714.29	3.18459	1.67111	0.183725	0.447332
hsa-miR-8057	42.78	60.2219	9.3948	10.3635	21.9022	11.3487	-2.58055	-1.36768	0.183638	0.447332
hsa-miR-3085-5p	4.52219	32.1473	6.2632	7.22045	6.7332	0.523784	-2.97585	-1.5733	0.183953	0.447332
hsa-miR-1236-3p	4.88397	135.533	22.8931	20.3871	12.3829	17.4013	-3.25693	-1.70351	0.183712	0.447332
hsa-miR-3156-3p	746.614	53.0447	280.656	181.616	1153.08	2301.45	3.36592	1.751	0.188788	0.457226
hsa-miR-4679	5.24574	69.9696	11.1226	6.45593	7.8941	16.7611	-2.77692	-1.47349	0.188565	0.457226
hsa-miR-665	18.8123	3.87236	13.0663	40.6894	17.8778	25.9564	2.37298	1.2467	0.190194	0.459699
hsa-miR-128-1-5p	9.13483	24.4359	15.442	5.86131	4.64359	9.19533	-2.49084	-1.31663	0.191284	0.4614
hsa-miR-590-3p	80.7664	8.21208	126.452	45.6162	19.3483	9.71911	-2.88389	-1.52801	0.192113	0.462465
hsa-miR-6822-3p	0.271332	26.706	1.94375	4.07743	5.41752	0.116397	-3.01582	-1.59255	0.192734	0.463026
hsa-miR-2392	195.449	3.93913	164.139	5.52152	1440.83	21.2424	4.037	2.01328	0.199094	0.463425
hsa-let-7d-3p	337.989	37.622	234.654	1030.06	157.108	709.437	3.10813	1.63604	0.199975	0.463425
hsa-miR-378a-3p	192.374	27.2735	243.077	809.88	191.393	429.736	3.09313	1.62907	0.198197	0.463425
hsa-miR-6824-5p	4.25086	16.9583	4.75139	3.22797	59.5927	13.0364	2.90914	1.54059	0.196025	0.463425
hsa-miR-4733-5p	10.2202	2.77074	0.647917	1.69893	35.9878	1.28036	2.85134	1.51164	0.19845	0.463425
hsa-miR-6792-5p	12.029	50.6745	14.1462	15.3753	78.3218	119.248	2.76568	1.46763	0.201615	0.463425
hsa-miR-4772-3p	17.0939	0.433972	4.64341	14.8656	4.25662	40.3896	2.68714	1.42607	0.201776	0.463425
hsa-miR-3074-5p	4.70308	15.8567	2.3757	11.2129	34.8269	15.1316	2.64252	1.40191	0.198505	0.463425
hsa-miR-4729	0.994883	13.6868	3.45556	3.4828	28.3259	14.4332	2.53086	1.33963	0.197663	0.463425
hsa-miR-6814-5p	26.6809	10.9494	24.0809	43.3227	4.64359	107.55	2.52138	1.33421	0.201913	0.463425
hsa-miR-3137	7.95906	11.5837	7.34306	33.1291	7.8941	22.4063	2.34643	1.23047	0.200868	0.463425
hsa-miR-6079	21.4352	8.94649	11.8785	4.33227	12.4603	3.2591	-2.1062	-1.07465	0.201034	0.463425
hsa-miR-3609	7.23551	11.6171	12.0945	3.31291	5.26273	5.41244	-2.20324	-1.13962	0.195729	0.463425
hsa-miR-10394-3p	6.96418	16.9583	15.766	4.33227	8.82281	3.95748	-2.32792	-1.21904	0.196392	0.463425
hsa-miR-4436b-5p	6.33107	21.8655	5.83125	7.47529	2.70876	3.95748	-2.42517	-1.27809	0.199601	0.463425
hsa-miR-5705	8.13995	36.1532	7.99098	5.77636	6.11405	8.14776	-2.61845	-1.38871	0.199504	0.463425
hsa-miR-2277-5p	6.96418	44.4654	10.4747	5.35163	15.3238	3.02631	-2.61882	-1.38891	0.202215	0.463425
hsa-miR-6795-5p	18.2697	62.5587	3.99549	7.81507	8.9776	15.5389	-2.62608	-1.39291	0.197679	0.463425
hsa-miR-6132	3.88909	34.3839	4.85938	6.20109	1.85743	8.08956	-2.67628	-1.42023	0.198492	0.463425
hsa-miR-5695	4.79353	36.2533	10.0427	6.62582	6.57841	5.87803	-2.68796	-1.42651	0.197395	0.463425
hsa-miR-433-3p	41.966	5.67501	30.3441	3.82259	24.611	0.290991	-2.71369	-1.44026	0.193627	0.463425
hsa-miR-4522	9.40616	273.769	31.532	34.6582	34.5947	34.6862	-3.02874	-1.59872	0.198912	0.463425
hsa-miR-197-3p	260.026	5.94207	191.567	7.22045	132.884	3.2591	-3.19107	-1.67404	0.201126	0.463425
hsa-miR-376a-3p	588.337	7.17722	923.93	2.80323	394.473	2.90991	-3.79669	-1.92474	0.200921	0.463425
hsa-miR-1207-5p	4.70308	9.91458	2.05174	5.52152	14.6273	17.5177	2.23272	1.1588	0.205218	0.465374
hsa-miR-4778-3p	2.71332	18.6608	3.34757	2.71829	6.34623	1.04757	-2.46125	-1.29939	0.204588	0.465374
hsa-miR-8062	7.95906	35.0182	10.9066	2.97313	11.2994	6.40181	-2.61288	-1.38564	0.205404	0.465374
hsa-miR-4747-5p	6.78329	29.1429	7.34306	7.1355	5.26273	3.89928	-2.67358	-1.41877	0.204024	0.465374
hsa-miR-5187-5p	4.06997	46.9357	15.55	6.54088	9.98371	8.08956	-2.70921	-1.43787	0.205368	0.465374
hsa-miR-4330	4.88397	67.9666	9.71875	7.3054	20.664	0.290991	-2.92444	-1.54816	0.203822	0.465374
hsa-miR-4750-3p	5.42663	21.1978	3.8875	33.8936	1.1609	55.6958	2.96462	1.56785	0.206358	0.466048
hsa-miR-499a-3p	17.3652	19.3952	8.53091	19.4527	92.5621	12.1634	2.7361	1.45212	0.206482	0.466048
hsa-miR-6741-5p	81.9421	5.1409	64.4677	200.813	87.609	113.37	2.65245	1.40732	0.208744	0.466743
hsa-miR-10396b-5p	8.77306	19.0614	4.21146	1.1043	6.81059	5.52884	-2.3882	-1.25593	0.207384	0.466743
hsa-miR-105-3p	10.401	23.568	15.1181	3.14302	8.20367	8.84614	-2.43105	-1.28158	0.20871	0.466743
hsa-miR-5739	2.53243	40.7266	9.50278	2.46345	14.4725	3.84109	-2.54409	-1.34715	0.208198	0.466743
hsa-miR-6499-5p	0.904439	22.9004	4.10347	0.594625	5.18534	5.06325	-2.57711	-1.36576	0.207794	0.466743
hsa-miR-6818-3p	26.2287	11.5837	1.83576	18.4334	7.04277	85.7261	2.8028	1.48687	0.209136	0.466745
hsa-miR-340-5p	39.4335	7.87826	21.9212	111.45	3.48269	71.0019	2.68618	1.42556	0.21067	0.468547
hsa-miR-5693	4.25086	8.04517	4.85938	10.6183	25.0754	2.79352	2.22868	1.15619	0.210728	0.468547
hsa-miR-33a-5p	34.3687	12.1846	12.5264	112.214	7.04277	38.7601	2.6741	1.41905	0.213323	0.473434
hsa-miR-514a-5p	17.727	240.621	35.9594	46.3808	16.0978	40.5642	-2.85726	-1.51463	0.21516	0.476625
hsa-miR-4443	6.05974	9.24694	12.0945	4.16238	65.2424	5.41244	2.72772	1.44769	0.216947	0.479693
hsa-miR-582-5p	11.1246	9.94797	23.0011	82.3131	7.27495	17.2267	2.4241	1.27745	0.219283	0.481295
hsa-miR-3690	5.78841	13.7536	8.96285	4.16238	3.25051	6.8092	-2.00962	-1.00692	0.218516	0.481295
hsa-miR-6795-3p	4.79353	68.9014	7.88299	13.8463	0.696538	15.7135	-2.69765	-1.4317	0.219267	0.481295
hsa-miR-610	2.35154	62.4585	9.93473	2.63334	1.93483	22.0571	-2.80623	-1.48863	0.218092	0.481295
hsa-miR-122b-3p	22.611	3.40501	26.7806	10.7882	136.754	3.2591	2.85693	1.51447	0.220842	0.48294
hsa-miR-654-3p	193.912	25.9715	213.273	16.5646	129.324	9.13713	-2.79372	-1.48219	0.220731	0.48294
hsa-miR-6823-5p	16.8226	47.7703	30.992	6.45593	262.75	16.7029	2.98925	1.57978	0.222061	0.483134
hsa-miR-122-5p	21.9779	12.9858	13.0663	8.32475	110.904	8.03136	2.64828	1.40506	0.224699	0.483134
hsa-miR-664a-3p	20.6212	0.634266	39.9549	72.4593	29.332	59.886	2.64363	1.40252	0.225057	0.483134
hsa-miR-1246	3.43687	13.9539	15.658	8.15486	50.3829	28.1098	2.61831	1.38864	0.224053	0.483134
hsa-miR-4440	3.25598	18.16	4.85938	8.32475	35.6782	24.0359	2.57106	1.36237	0.223329	0.483134
hsa-miR-6854-5p	8.23039	8.07855	7.66702	15.885	8.28106	26.7712	2.12555	1.08784	0.22498	0.483134
hsa-miR-4701-5p	25.3243	28.108	23.217	16.0549	10.1385	5.17965	-2.45557	-1.29606	0.223139	0.483134
hsa-miR-92b-5p	14.471	94.0049	19.4375	14.8656	13.3116	21.0678	-2.60052	-1.3788	0.221425	0.483134
hsa-miR-337-5p	241.033	130.826	119.541	65.7486	15.556	103.186	-2.66269	-1.41288	0.224877	0.483134
hsa-miR-4666b	30.3891	196.122	35.5274	28.0323	40.554	29.5065	-2.67334	-1.41864	0.224844	0.483134
hsa-miR-383-5p	17.8174	265.123	30.1281	51.2227	30.9572	32.1836	-2.73879	-1.45354	0.225382	0.483134
hsa-miR-4449	2.98465	55.5484	8.85487	8.57959	6.50102	10.5339	-2.63496	-1.39778	0.226097	0.483799
hsa-miR-1199-5p	2.71332	8.81296	5.50729	6.20109	18.6517	10.0683	2.02854	1.02044	0.227296	0.48381
hsa-miR-3617-3p	43.7748	0.467354	9.93473	7.56023	0.773931	12.7454	-2.56597	-1.35951	0.226773	0.48381
hsa-miR-532-3p	240.49	59.2204	66.6275	31.0904	39.0061	69.9543	-2.61415	-1.38634	0.227318	0.48381
hsa-miR-363-5p	3.25598	22.1993	4.31945	2.54839	7.97149	2.56072	-2.289	-1.19472	0.228156	0.484729
hsa-miR-3127-5p	2.8942	47.4031	2.59167	10.0237	3.71487	6.6346	-2.60166	-1.37943	0.230068	0.487624
hsa-miR-6789-3p	4.06997	30.1777	2.26771	6.11614	6.57841	0.931172	-2.69103	-1.42816	0.230743	0.487624
hsa-miR-214-3p	237.234	665.479	204.85	182.295	89.389	121.576	-2.81719	-1.49426	0.230486	0.487624
hsa-miR-208a-5p	18.1792	3.07118	10.5826	39.9248	5.34012	22.5227	2.13284	1.09278	0.234933	0.49283
hsa-miR-4499	4.88397	7.94502	7.99098	15.8	11.9959	12.338	1.89767	0.924227	0.234824	0.49283
hsa-miR-3162-3p	10.3106	14.5214	8.85487	0.424732	6.26884	8.38055	-2.23067	-1.15747	0.234406	0.49283
hsa-miR-4703-3p	40.1571	268.495	45.2462	100.662	18.0326	11.7561	-2.71418	-1.44052	0.235119	0.49283
hsa-miR-182-5p	2191.91	81.8537	1257.5	310.14	498.102	386.844	-2.95471	-1.56302	0.235271	0.49283
hsa-miR-4475	6.6024	141.375	19.2215	15.2904	36.1426	7.15839	-2.8557	-1.51384	0.237414	0.495844
hsa-miR-199a-3p	721.742	29.4433	635.283	14.1861	431.08	20.0784	-2.97933	-1.57499	0.23754	0.495844
hsa-miR-24-3p	13524.1	678.365	11304.6	30270.5	2240.14	38715.7	2.79242	1.48152	0.239398	0.498544
hsa-miR-6807-5p	21.1639	10.1483	28.8323	10.1936	3.63748	14.4914	-2.11428	-1.08017	0.240086	0.498544
hsa-miR-4476	12.1195	41.6947	18.1417	14.0162	9.98371	7.15839	-2.32128	-1.21492	0.239878	0.498544
hsa-miR-375-5p	2.98465	56.2828	10.4747	12.3172	10.1385	4.59766	-2.58383	-1.36951	0.240975	0.499521
hsa-miR-1204	43.6844	53.4787	59.1764	23.6151	305.006	85.0277	2.64536	1.40346	0.244807	0.506586
hsa-miR-3659	5.60752	24.1355	1.83576	1.86882	5.18534	7.04199	-2.24592	-1.1673	0.246201	0.507726
hsa-miR-6880-5p	7.68773	114.969	28.0764	16.4796	29.7963	9.83551	-2.68897	-1.42705	0.246209	0.507726
hsa-miR-1245b-5p	7.50684	16.2239	8.53091	20.9818	48.1385	7.10019	2.35195	1.23386	0.247407	0.509192
hsa-miR-4740-3p	4.61264	73.3078	4.75139	10.8731	10.1385	11.9306	-2.51308	-1.32945	0.247773	0.509192
hsa-miR-6826-3p	4.97441	121.045	8.53091	20.7269	3.79226	23.5121	-2.80251	-1.48672	0.248244	0.509283
hsa-miR-7856-5p	13.3857	5.87531	1.51181	49.9485	4.33401	0.174595	2.61653	1.38766	0.248859	0.509637
hsa-miR-6746-3p	10.0393	71.0378	9.82674	14.356	16.3299	6.8092	-2.43001	-1.28096	0.24927	0.509637
hsa-miR-887-3p	29.4847	35.7192	22.0292	16.9043	13.5438	11.2905	-2.11045	-1.07755	0.250154	0.510571
hsa-miR-4796-3p	8.41128	24.1689	4.96736	7.56023	79.4053	8.20596	2.52679	1.33731	0.250999	0.511422
hsa-miR-4732-3p	479.443	21.2646	473.519	105.334	168.949	102.371	-2.58623	-1.37085	0.251842	0.512265
hsa-miR-101-3p	42.5086	0.667649	50.7535	26.4183	4.17923	7.21659	-2.4828	-1.31197	0.253204	0.514034
hsa-miR-148a-3p	369.644	4.54001	122.132	57.5937	27.165	106.619	-2.59281	-1.37452	0.253573	0.514034
hsa-miR-8078	42.8704	6.70987	89.7365	216.529	1.23829	155.157	2.67711	1.42067	0.255271	0.516581
hsa-miR-5193	31.0222	13.5199	19.5455	40.4345	61.9919	45.0455	2.30964	1.20767	0.255695	0.516581
hsa-miR-4297	2.2611	7.51105	11.8785	14.0162	13.3116	14.8988	1.9525	0.965319	0.257493	0.51776
hsa-miR-1343-5p	9.58705	18.16	4.96736	2.63334	4.64359	8.08956	-2.13299	-1.09287	0.257579	0.51776
hsa-miR-1247-5p	4.34131	33.9833	4.10347	7.98497	8.35845	0.523784	-2.52341	-1.33537	0.257074	0.51776
hsa-miR-4287	42.4182	19.0948	48.2698	127.25	23.0631	99.1699	2.27428	1.18541	0.260054	0.521856
hsa-miR-3135b	2.2611	56.7835	10.6906	8.15486	6.50102	13.5602	-2.47415	-1.30693	0.261098	0.523072
hsa-miR-3674	40.0666	8.21208	7.88299	7.3054	14.3177	5.47064	-2.07148	-1.05067	0.26248	0.524959
hsa-miR-625-5p	45.4933	10.2484	111.442	6.88066	54.4073	0.290991	-2.71421	-1.44053	0.26317	0.52546
hsa-miR-4482-3p	3.88909	21.6318	2.59167	2.71829	4.41141	5.70343	-2.20102	-1.13817	0.263929	0.525586
hsa-miR-4765	7.50684	25.2037	16.8458	7.98497	11.9185	0.0581983	-2.48507	-1.31329	0.264554	0.525586
hsa-miR-549a-5p	1.80888	29.7438	3.77952	2.63334	2.70876	8.67154	-2.52425	-1.33586	0.264315	0.525586
hsa-miR-517-5p	4.52219	39.7251	4.64341	1.35914	119.031	9.83551	2.65853	1.41063	0.267568	0.530506
hsa-miR-4775	19.8072	4.00589	30.5601	10.3635	9.28717	6.51821	-2.07184	-1.05091	0.267919	0.530506
hsa-miR-6868-3p	5.69796	65.3294	11.7705	19.113	3.63748	12.5708	-2.34773	-1.23127	0.269401	0.530799
hsa-miR-105-5p	13.1144	103.452	23.109	6.79572	22.7536	26.3638	-2.49935	-1.32155	0.26879	0.530799
hsa-miR-4326	8.23039	104.153	9.28681	26.7581	5.88188	15.3643	-2.53721	-1.34324	0.268989	0.530799
hsa-miR-4493	3.07509	63.6269	3.34757	8.23981	17.4908	3.14271	-2.43009	-1.28101	0.269901	0.530908
hsa-miR-181a-5p	4476.34	335.093	5019.52	13118.8	2624.48	10003.3	2.61895	1.38899	0.270857	0.531332
hsa-miR-193a-3p	130.691	8.51252	138.114	53.8561	35.7556	26.131	-2.3952	-1.26015	0.271294	0.531332
hsa-miR-657	1.53755	106.056	12.8504	21.9162	6.96538	17.1685	-2.61715	-1.388	0.271451	0.531332
hsa-miR-3157-5p	11.3959	40.0923	24.9448	2.63334	26.7006	3.08451	-2.35963	-1.23856	0.273194	0.533868
hsa-miR-6879-3p	12.3004	10.7825	4.64341	15.9699	13.9308	27.9352	2.07608	1.05386	0.274702	0.535064
hsa-miR-4753-5p	8.68261	15.0555	17.2778	9.25916	5.18534	6.22722	-1.99075	-0.993312	0.274638	0.535064
hsa-miR-23a-3p	3103.49	440.181	5286.46	10070.3	5558.37	6953.7	2.55746	1.35471	0.27762	0.539868
hsa-miR-614	4.52219	69.5022	5.39931	11.8076	15.4012	7.10019	-2.31922	-1.21364	0.278248	0.540208
hsa-miR-1248	2.08021	29.3098	6.69514	6.20109	14.0082	68.7904	2.33043	1.22059	0.280253	0.543218
hsa-miR-1228-5p	13.5666	10.7491	8.85487	9.59895	1.0835	63.9017	2.24762	1.1684	0.283849	0.545758
hsa-miR-204-3p	7.59729	7.4109	10.0427	27.2678	7.73931	10.9413	1.83406	0.875042	0.283591	0.545758
hsa-miR-627-3p	6.15018	15.189	6.80313	4.16238	0.619145	8.96253	-2.04704	-1.03354	0.282223	0.545758
hsa-miR-676-3p	18.0888	49.4394	16.7379	8.23981	3.79226	23.9777	-2.33962	-1.22627	0.283439	0.545758
hsa-miR-6892-5p	6.33107	131.627	17.3858	11.3828	30.5703	18.2743	-2.58102	-1.36794	0.283724	0.545758
hsa-miR-4307	25.5052	321.406	41.1427	39.585	6.03666	98.4715	-2.69316	-1.4293	0.284311	0.545767
hsa-miR-6770-5p	14.2901	31.4796	15.442	9.93874	8.66803	8.61334	-2.26822	-1.18156	0.285022	0.545773
hsa-miR-6892-3p	13.7475	45.9342	3.45556	13.6764	5.03055	9.02073	-2.28281	-1.19081	0.285228	0.545773
hsa-miR-4454	7.77817	13.0192	9.17882	6.88066	9.28717	47.1988	2.11109	1.07799	0.286168	0.546695
hsa-miR-6808-5p	14.3806	10.8159	9.3948	25.9936	4.72098	39.051	2.01648	1.01184	0.289605	0.552377
hsa-miR-3929	3.16554	23.4345	3.8875	5.86131	3.01833	6.22722	-2.02901	-1.02077	0.290625	0.55344
hsa-miR-34a-5p	5967.03	433.037	4492.12	14610.3	2386.18	10258.8	2.50229	1.32325	0.292474	0.554191
hsa-miR-6846-3p	6.33107	46.3348	6.80313	58.0184	22.6762	51.3309	2.21243	1.14563	0.292876	0.554191
hsa-miR-132-5p	47.7544	235.546	57.9886	46.7206	64.5458	32.8238	-2.37042	-1.24514	0.292536	0.554191
hsa-miR-564	3.16554	104.253	8.31493	12.9119	26.6232	7.44938	-2.46561	-1.30195	0.292645	0.554191
hsa-miR-1909-5p	1.4471	59.0869	0.755903	5.18173	2.01222	16.6447	-2.5717	-1.36272	0.293528	0.554545
hsa-miR-4783-5p	3.61775	37.5219	5.83125	6.20109	10.4481	4.30667	-2.24986	-1.16983	0.294294	0.555113
hsa-miR-200b-3p	88.3637	193.418	76.7782	857.195	33.4338	39.924	2.59466	1.37555	0.297825	0.557371
hsa-miR-29a-5p	4.88397	4.74031	10.1507	25.7388	2.32179	12.2216	2.03932	1.02809	0.297508	0.557371
hsa-miR-6791-3p	15.6468	11.35	10.0427	25.2291	13.776	33.6386	1.9633	0.973277	0.296815	0.557371
hsa-miR-320e	61.6827	13.1527	46.866	21.2366	23.3727	11.1741	-2.17966	-1.1241	0.297784	0.557371
hsa-miR-889-3p	104.553	0.767796	104.531	1.1043	70.5825	0.116397	-2.92199	-1.54695	0.296733	0.557371
hsa-let-7a-3p	355.625	40.6264	348.687	1262.9	108.041	541.302	2.56712	1.36015	0.299075	0.557399
hsa-miR-33a-3p	6.33107	17.8262	9.50278	3.22797	66.4033	7.97316	2.30015	1.20173	0.299207	0.557399
hsa-miR-4487	8.41128	40.4595	21.7052	11.3828	7.58452	14.8988	-2.08767	-1.06189	0.29924	0.557399
hsa-miR-100-5p	10231.9	393.679	13664.5	19294.7	22701.1	16890.7	2.42431	1.27757	0.30258	0.56225
hsa-miR-6833-5p	20.2594	57.1174	6.58716	7.22045	27.0102	4.59766	-2.16612	-1.11511	0.303832	0.56225
hsa-miR-6090	5.1553	40.0589	7.775	3.73764	19.5805	0.814776	-2.19981	-1.13738	0.303772	0.56225
hsa-miR-7855-5p	98.0412	10.0481	56.0448	20.557	35.2913	17.2267	-2.24457	-1.16644	0.304028	0.56225
hsa-miR-4718	70.094	4.50663	81.6375	29.3915	23.8371	15.8299	-2.26101	-1.17697	0.304199	0.56225
hsa-miR-4428	23.3345	3.53854	2.80764	29.2216	17.5682	10.0101	1.91419	0.936736	0.306921	0.566405
hsa-miR-9900	12.7526	17.6927	9.50278	40.1797	5.41752	41.5536	2.17676	1.12218	0.310553	0.569233
hsa-miR-28-5p	65.6622	16.324	52.8052	150.865	21.6701	112.264	2.11395	1.07994	0.310838	0.569233
hsa-miR-1304-5p	42.6895	7.87826	5.18334	6.45593	2.2444	19.4382	-1.97769	-0.983817	0.309358	0.569233
hsa-miR-5589-5p	14.2901	89.5985	20.4094	18.3484	21.0509	16.8193	-2.21508	-1.14736	0.310117	0.569233
hsa-miR-555	2.53243	27.2401	12.5264	3.99248	10.4481	4.53947	-2.2349	-1.16021	0.310257	0.569233
hsa-miR-6836-3p	42.9608	10.3486	12.3104	12.657	10.9124	10.1847	-1.94139	-0.95709	0.312634	0.571647
hsa-miR-579-3p	8.95394	3.27148	8.96285	7.56023	13.6212	18.3907	1.88848	0.917226	0.314359	0.573046
hsa-miR-7113-3p	5.51708	7.87826	7.0191	9.17422	22.9858	5.06325	1.81514	0.860081	0.314082	0.573046
hsa-miR-4485-5p	14.8328	37.9558	12.6344	31.4302	70.5825	32.3	2.04398	1.03138	0.315512	0.573645
hsa-miR-12115	1.26621	16.7246	3.67153	1.35914	3.79226	5.70343	-2.00254	-1.00183	0.316882	0.573645
hsa-miR-3934-3p	0.452219	19.6623	7.55903	6.28604	1.31568	5.70343	-2.0844	-1.05963	0.317571	0.573645
hsa-miR-598-3p	27.9472	2.77074	19.9774	3.56775	1.70265	18.6234	-2.11505	-1.08069	0.317143	0.573645
hsa-miR-4661-3p	22.1587	99.6132	19.0056	9.76884	11.1446	41.5536	-2.2541	-1.17255	0.316155	0.573645
hsa-miR-4654	11.8481	106.39	13.7142	11.2129	32.5051	12.6872	-2.34203	-1.22776	0.316911	0.573645
hsa-miR-6755-5p	6.15018	12.218	13.2823	4.24732	10.9898	1.97874	-1.84317	-0.882192	0.319495	0.575379
hsa-miR-885-3p	6.96418	22.3996	9.61077	9.59895	0.773931	9.07893	-2.00682	-1.00491	0.319318	0.575379
hsa-miR-302f	6.42151	5.1409	6.69514	9.85379	1.23829	24.7343	1.96388	0.973704	0.321025	0.576792
hsa-miR-7159-3p	6.33107	11.5503	18.3576	12.5721	3.01833	4.19028	-1.83425	-0.875192	0.321245	0.576792
hsa-miR-423-3p	1893.62	112.299	2347.4	4194.91	3510.63	2616.48	2.37111	1.24556	0.322788	0.576871
hsa-miR-28-3p	92.705	8.87973	143.73	165.561	282.949	117.735	2.30907	1.20731	0.323222	0.576871
hsa-miR-1197	5.60752	10.7491	1.83576	11.8925	6.96538	14.375	1.80363	0.850905	0.323064	0.576871
hsa-miR-106a-5p	12290.2	652.927	11310.3	5117.68	2151.84	2868.01	-2.39243	-1.25848	0.321836	0.576871
hsa-miR-7975	9.31572	8.84635	4.75139	9.34411	24.8432	9.60272	1.89946	0.925587	0.323809	0.577056
hsa-miR-516a-3p	8.50172	21.2646	19.6535	15.2054	87.4542	6.22722	2.20071	1.13797	0.32445	0.577337
hsa-miR-4717-5p	3.34642	8.41237	10.9066	4.757	33.8982	5.93622	1.96474	0.974335	0.327272	0.578051
hsa-miR-4660	9.31572	12.0844	7.45105	6.28604	7.42974	3.60829	-1.6953	-0.761543	0.326366	0.578051
hsa-miR-6877-5p	5.1553	21.2646	6.47917	6.71077	1.70265	8.20596	-1.98628	-0.990072	0.327131	0.578051
hsa-miR-4268	10.7628	53.679	9.61077	8.66454	9.20978	16.7611	-2.14211	-1.09903	0.325889	0.578051
hsa-miR-1307-3p	210.553	52.0098	255.063	28.1173	162.68	31.7763	-2.32526	-1.21739	0.325372	0.578051
hsa-miR-378j	4.43175	8.84635	2.3757	14.1011	4.41141	11.9888	1.92095	0.941819	0.329531	0.581181
hsa-miR-4325	45.9455	3.53854	25.2688	88.9389	19.89	55.2884	2.19712	1.13562	0.330566	0.58129
hsa-miR-550b-2-5p	23.5154	15.5562	9.71875	8.57959	89.8534	3.3173	2.0838	1.05922	0.330192	0.58129
hsa-miR-4730	9.76794	30.111	11.0146	5.69141	10.9124	8.49695	-2.03783	-1.02703	0.333497	0.585582
hsa-miR-6882-3p	4.43175	17.893	4.42743	6.37098	3.4053	4.48127	-1.89557	-0.922632	0.334453	0.586398
hsa-miR-146a-5p	412.967	75.2106	284.652	1001.52	306.399	487.469	2.32341	1.21624	0.336712	0.588164
hsa-miR-6853-3p	9.58705	5.67501	7.12709	6.28604	26.4684	6.8092	1.76827	0.822336	0.336938	0.588164
hsa-miR-6752-3p	11.9386	46.0678	18.1417	8.06991	8.04888	19.7292	-2.12607	-1.08819	0.336244	0.588164
hsa-miR-6070	82.6657	15.3893	30.5601	111.365	34.5947	110.926	1.99841	0.998853	0.337806	0.588818
hsa-miR-2682-3p	10.401	11.9509	6.80313	15.4603	13.2342	25.3744	1.84079	0.880322	0.344329	0.599313
hsa-miR-11400	6.24063	8.27884	11.5545	8.4097	18.7291	21.0096	1.8541	0.89072	0.345776	0.600083
hsa-miR-1281	12.6621	39.8252	16.6299	15.2904	9.13239	11.6979	-1.92306	-0.943402	0.345357	0.600083
hsa-let-7i-3p	127.345	5.04075	32.8278	25.7388	7.12017	43.9397	-2.14991	-1.10428	0.346522	0.600503
hsa-miR-4318	10.0393	12.218	1.18785	5.77636	16.5621	23.9195	1.96422	0.973957	0.348624	0.603271
hsa-miR-5581-3p	21.5256	12.0511	29.1563	3.4828	21.9796	7.85677	-1.87968	-0.910489	0.349563	0.604021
hsa-miR-1255b-2-3p	3.07509	6.34266	4.96736	6.11614	0.0773931	23.6285	2.06885	1.04883	0.351759	0.605677
hsa-miR-942-3p	14.7424	7.74473	6.80313	15.9699	21.4379	14.957	1.79164	0.841279	0.351561	0.605677
hsa-miR-6784-3p	1.08533	35.9863	1.18785	5.60647	0.309572	10.3593	-2.35264	-1.23428	0.352044	0.605677
hsa-miR-127-5p	15.9181	9.21355	5.83125	6.88066	2.01222	8.08956	-1.82012	-0.86403	0.354239	0.607751
hsa-miR-1237-3p	8.95394	62.5253	17.2778	10.1086	12.2281	22.8137	-1.96839	-0.977018	0.354267	0.607751
hsa-miR-874-3p	33.1929	6.10899	14.7941	44.0872	7.66192	53.9498	1.95591	0.96784	0.359361	0.612967
hsa-miR-1255a	12.7526	3.8056	20.1934	5.86131	10.3707	4.01568	-1.80787	-0.854295	0.358863	0.612967
hsa-miR-4437	12.2099	11.4502	6.69514	7.56023	8.28106	0.465586	-1.86708	-0.900784	0.358545	0.612967
hsa-miR-3529-5p	1226.6	9.98135	1284.6	10.7882	914.013	16.1209	-2.67944	-1.42193	0.357829	0.612967
hsa-miR-1343-3p	12.5717	10.6824	25.9167	8.06991	6.81059	12.629	-1.7728	-0.826031	0.360862	0.61436
hsa-miR-4677-5p	63.1298	10.7158	3.23958	12.0624	12.2281	16.8193	-1.87385	-0.906006	0.361207	0.61436
hsa-miR-21-5p	75710.5	5933.66	98067	257985	45626.4	74947.6	2.10648	1.07484	0.362643	0.614448
hsa-miR-1908-3p	5.78841	60.9563	14.0382	68.6367	72.053	28.3426	2.08726	1.06161	0.362044	0.614448
hsa-miR-12119	3.07509	9.81444	6.37118	10.3635	11.3768	11.4651	1.69537	0.761599	0.362802	0.614448
hsa-miR-140-5p	191.198	42.9966	221.264	383.024	175.682	389.754	2.08316	1.05878	0.3645	0.61645
hsa-miR-636	13.2952	18.2602	12.4184	18.3484	3.94705	0.872974	-1.90257	-0.927951	0.365529	0.616721
hsa-miR-192-5p	216.251	16.4242	247.72	121.388	37.1487	70.7691	-2.09457	-1.06666	0.365694	0.616721
hsa-miR-6750-3p	8.0495	43.4306	7.55903	8.4097	4.4888	17.2849	-1.95929	-0.97033	0.366221	0.616739
hsa-miR-4635	3.79864	33.4492	8.42292	6.71077	10.6029	4.94685	-2.06055	-1.04303	0.367511	0.61804
hsa-miR-6731-5p	10.401	11.4168	26.2406	11.6377	64.5458	20.8932	2.02222	1.01594	0.368424	0.618073
hsa-miR-4260	72.4455	86.4939	2.48368	9.17422	59.6701	0.407388	-2.33142	-1.22121	0.368566	0.618073
hsa-miR-411-5p	2605.69	16.9583	2359.61	8.23981	1833.44	7.44938	-2.69435	-1.42994	0.370215	0.619967
hsa-miR-4290	15.5563	103.419	11.3385	22.8506	9.59674	29.3901	-2.10938	-1.07682	0.372791	0.623408
hsa-miR-1268a	13.0239	53.1115	24.2969	19.2828	19.89	8.20596	-1.91478	-0.937176	0.373614	0.62391
hsa-miR-495-5p	65.6622	11.35	33.5837	23.4452	27.8615	3.14271	-2.03092	-1.02213	0.374324	0.624221
hsa-miR-9500	8.8635	104.02	15.982	10.1086	32.5825	18.6816	-2.10185	-1.07166	0.376158	0.626406
hsa-miR-6821-5p	14.1092	40.2258	4.31945	24.2097	1.78004	4.13208	-1.95157	-0.964639	0.377527	0.627809
hsa-miR-1976	24.8721	15.4895	11.3385	4.07743	14.5499	10.8249	-1.75307	-0.809886	0.379453	0.630134
hsa-miR-652-3p	2209	163.774	2669.42	5312.98	799.239	4825.74	2.16931	1.11724	0.382547	0.63231
hsa-miR-146b-3p	197.258	14.1208	98.6994	146.448	87.9186	417.805	2.1037	1.07293	0.383013	0.63231
hsa-miR-6800-3p	1.62799	16.3908	5.50729	4.07743	2.39919	6.6346	-1.80233	-0.849862	0.381501	0.63231
hsa-miR-1301-3p	51.553	8.91311	18.0337	5.60647	31.3442	6.28541	-1.81458	-0.859637	0.383941	0.63231
hsa-miR-4724-5p	4.97441	20.9976	6.04723	3.56775	12.3829	0	-2.01052	-1.00757	0.383645	0.63231
hsa-miR-99a-3p	68.8278	1527.11	96.2157	206.335	91.1691	455.751	-2.24654	-1.1677	0.382417	0.63231
hsa-miR-3181	16.099	43.7644	17.4938	22.5108	98.0571	28.5172	1.92286	0.943257	0.385729	0.634381
hsa-miR-3127-3p	16.5512	1.40206	26.2406	3.14302	12.6151	8.43875	-1.8213	-0.86497	0.387902	0.637077
hsa-miR-3978	26.8618	108.159	26.2406	48.4195	252.302	30.7869	2.05387	1.03835	0.393122	0.638708
hsa-miR-7106-3p	2.62287	19.9961	4.10347	10.4484	0.696538	43.5905	2.04198	1.02997	0.393174	0.638708
hsa-miR-5195-5p	63.1298	0.667649	22.1372	28.1173	84.1263	62.5631	2.03483	1.0249	0.392545	0.638708
hsa-miR-4292	120.562	16.7914	22.2452	72.2045	16.1752	231.047	2.00176	1.00127	0.39017	0.638708
hsa-miR-6716-3p	4.34131	7.91164	6.15521	2.63334	6.42363	23.1047	1.74473	0.803003	0.393167	0.638708
hsa-miR-6827-5p	5.1553	17.7928	10.7986	3.4828	7.73931	7.97316	-1.76373	-0.818632	0.390582	0.638708
hsa-miR-140-3p	47.1213	26.706	22.1372	17.414	18.11	17.8087	-1.79762	-0.846086	0.39128	0.638708
hsa-miR-4466	6.42151	69.6691	12.7424	16.6495	19.4257	10.2429	-1.92207	-0.942657	0.389561	0.638708
hsa-miR-219a-5p	15.4659	4.80707	19.1136	6.71077	13.6212	1.39676	-1.81071	-0.856553	0.395938	0.641452
hsa-miR-4738-3p	5.60752	12.9524	8.20695	4.757	0.154786	9.83551	-1.814	-0.859171	0.395666	0.641452
hsa-miR-455-3p	121.557	1.86942	135.955	5.43657	613.34	2.09514	2.39363	1.2592	0.398565	0.64396
hsa-miR-6731-3p	5.87885	12.0177	2.69965	12.4022	4.95316	18.5653	1.72865	0.789647	0.398371	0.64396
hsa-miR-6782-5p	2.44198	19.2617	0.323958	2.71829	0.928717	7.79857	-1.92872	-0.947642	0.399901	0.645246
hsa-miR-4747-3p	7.14507	21.298	5.93924	3.99248	11.9185	51.2145	1.94707	0.961302	0.401533	0.646045
hsa-miR-7843-3p	27.7663	51.9431	36.0674	19.7925	13.3116	31.1361	-1.80292	-0.850339	0.40202	0.646045
hsa-miR-6875-3p	5.60752	45.8007	6.47917	12.9968	5.18534	12.1052	-1.9165	-0.938477	0.401092	0.646045
hsa-miR-382-5p	305.248	8.57929	297.61	30.4108	241.931	4.88866	-2.20538	-1.14103	0.403296	0.647225
hsa-miR-496	54.8994	0.867943	64.6837	91.4024	40.2444	111.275	2.01754	1.0126	0.407344	0.649357
hsa-miR-7-1-3p	24.6007	4.90722	24.1889	29.4764	14.8595	52.4366	1.80687	0.853491	0.405405	0.649357
hsa-miR-4731-5p	8.77306	19.2617	19.4375	10.1086	10.0611	8.03136	-1.69099	-0.757866	0.407222	0.649357
hsa-miR-4664-3p	28.7612	36.3869	47.4059	10.2785	37.613	11.3487	-1.90002	-0.926017	0.406828	0.649357
hsa-miR-369-5p	3623.45	26.539	3197.25	6.62582	2717.81	10.0683	-2.504	-1.32424	0.406619	0.649357
hsa-miR-20b-3p	6.42151	15.8567	8.63889	3.99248	7.12017	7.27478	-1.69345	-0.759961	0.410103	0.652014
hsa-miR-2116-5p	6.78329	41.6613	8.74688	12.1473	7.50713	12.1052	-1.80728	-0.853819	0.409838	0.652014
hsa-miR-574-3p	138.017	22.9004	123.104	95.4798	323.348	132.226	1.94087	0.956704	0.413585	0.652187
hsa-miR-670-5p	12.029	1.30192	8.96285	23.87	2.16701	14.8988	1.84	0.879709	0.412482	0.652187
hsa-miR-4700-3p	2.2611	13.2194	7.55903	1.1043	3.56008	9.25353	-1.6554	-0.727178	0.414362	0.652187
hsa-miR-328-5p	10.0393	22.0324	4.42743	6.28604	2.01222	12.8618	-1.72795	-0.789064	0.41324	0.652187
hsa-miR-3136-5p	5.60752	42.9632	10.7986	11.9775	12.2281	8.32235	-1.83224	-0.873606	0.414306	0.652187
hsa-miR-3621	18.2697	32.4811	10.7986	2.12366	26.4684	4.42307	-1.8667	-0.900488	0.413373	0.652187
hsa-miR-5011-3p	49.5632	445.589	61.9841	26.4183	91.1691	142.353	-2.14358	-1.10003	0.411366	0.652187
hsa-miR-337-3p	1099.89	13.1527	653.532	6.11614	728.656	25.549	-2.32341	-1.21624	0.414581	0.652187
hsa-miR-584-5p	155.563	271.399	156.796	32.0248	190.619	69.8379	-1.99617	-0.997235	0.41547	0.652726
hsa-miR-1910-5p	8.77306	5.7084	9.61077	1.86882	45.6619	0.0581983	1.97376	0.980945	0.416657	0.65373
hsa-miR-432-3p	14.2901	107.224	14.4701	13.0818	29.4094	25.7818	-1.99395	-0.995628	0.419854	0.657882
hsa-miR-6507-3p	5.69796	11.3834	6.2632	31.685	0.386965	9.71911	1.78512	0.836025	0.421262	0.65836
hsa-miR-500a-5p	27.7663	3.47177	26.1327	12.3172	7.12017	13.7348	-1.72436	-0.786061	0.421046	0.65836
hsa-miR-5587-3p	2.62287	143.244	4.96736	28.1173	20.1222	23.6285	-2.10004	-1.07042	0.423575	0.661109
hsa-miR-431-5p	291.953	10.9494	236.922	22.5958	224.363	13.502	-2.07241	-1.05131	0.424449	0.661609
hsa-miR-3158-3p	45.4028	6.77663	15.658	7.1355	133.658	0.523784	2.08287	1.05857	0.426057	0.662385
hsa-miR-12135	91.2579	8.14531	110.794	17.3291	374.97	39.9822	2.05679	1.0404	0.425895	0.662385
hsa-miR-4665-3p	26.1383	109.561	32.1799	175.075	54.33	93.641	1.92155	0.942272	0.427018	0.662742
hsa-miR-4299	10.0393	12.9858	16.0899	2.46345	69.0346	3.14271	1.90693	0.931255	0.428123	0.662742
hsa-miR-499a-5p	9.85838	7.9784	16.3059	16.1398	2.2444	0.34919	-1.82405	-0.867147	0.428507	0.662742
hsa-miR-3177-3p	16.099	281.114	38.1191	96.839	22.2118	44.9291	-2.04581	-1.03267	0.427424	0.662742
hsa-miR-224-5p	10.9437	8.81296	11.1226	5.18173	44.4236	4.13208	1.73928	0.798493	0.429374	0.663225
hsa-miR-5682	428.071	22.5665	367.369	957.177	243.788	462.094	2.0332	1.02375	0.43065	0.664336
hsa-miR-29b-1-5p	10.7628	5.94207	15.874	24.0398	14.3951	13.6766	1.61173	0.688609	0.435282	0.670616
hsa-miR-1229-5p	7.32595	14.1208	4.96736	6.37098	8.74542	0.872974	-1.6622	-0.733097	0.436149	0.671085
hsa-miR-152-5p	8.41128	14.1875	9.17882	3.99248	14.0082	0.581983	-1.71404	-0.777398	0.438897	0.674444
hsa-miR-6126	16.8226	19.5287	12.8504	3.90754	19.6578	5.35424	-1.70412	-0.769028	0.439921	0.675148
hsa-miR-454-5p	10.3106	2.97104	10.9066	3.6527	10.2933	27.0622	1.70299	0.768071	0.441199	0.675803
hsa-miR-6077	9.13483	11.4502	7.45105	7.64518	5.80448	4.59766	-1.59509	-0.673634	0.441479	0.675803
hsa-miR-135a-3p	8.0495	48.3712	22.6771	2.63334	35.446	4.36487	-1.8653	-0.899411	0.442696	0.676798
hsa-miR-4762-3p	7.59729	42.7629	11.7705	9.85379	14.7047	10.7085	-1.76851	-0.822533	0.44343	0.677053
hsa-miR-4690-3p	9.67749	4.43986	4.53542	3.39786	30.8025	0.174595	1.84071	0.880259	0.444935	0.678483
hsa-miR-892b	9.04439	48.7717	15.334	17.3291	6.81059	15.6553	-1.84291	-0.881986	0.445664	0.678729
hsa-miR-1306-3p	5.9693	6.54296	5.50729	15.6301	6.19145	7.85677	1.63262	0.707185	0.446804	0.678889
hsa-miR-362-5p	19.355	4.9406	31.1	9.08927	4.4888	20.7768	-1.6067	-0.684102	0.446907	0.678889
hsa-miR-151a-5p	2710.96	107.525	2148.06	3481.7	3963.53	2253.67	1.95287	0.965596	0.447691	0.679215
hsa-miR-4281	6.51196	53.7123	9.50278	5.26668	9.36457	23.7449	-1.81891	-0.863074	0.449324	0.680606
hsa-miR-320a-3p	1201.19	45.6672	1481.79	368.243	786.778	189.959	-2.02871	-1.02056	0.449747	0.680606
hsa-miR-1-3p	23.7867	22.4998	25.1608	87.5798	8.28106	25.7818	1.70167	0.766948	0.451164	0.681024
hsa-miR-6500-3p	10.1297	7.01031	17.6017	10.1086	4.10183	7.15839	-1.61618	-0.692591	0.451144	0.681024
hsa-miR-4790-5p	4.52219	7.71134	8.74688	19.7076	7.58452	7.39118	1.64634	0.719261	0.452448	0.68124
hsa-miR-3936	5.9693	9.91458	1.72778	13.5065	10.5255	4.83046	1.61783	0.694061	0.452243	0.68124
hsa-miR-218-2-3p	26.6809	288.191	29.1563	461.259	71.279	148.929	1.97995	0.985464	0.45368	0.681376
hsa-miR-760	15.8277	15.3893	15.55	30.6657	16.4073	33.2894	1.71972	0.782178	0.453573	0.681376
hsa-miR-4667-3p	14.8328	66.7983	22.3531	65.9185	58.8188	60.8172	1.77903	0.831091	0.457603	0.686405
hsa-miR-134-5p	109.708	2.57045	64.1438	2.80323	85.1324	7.33298	-1.85148	-0.888677	0.460404	0.688875
hsa-miR-410-3p	66.5667	1.10162	101.183	17.499	55.0265	16.9939	-1.88548	-0.914929	0.459969	0.688875
hsa-miR-639	5.24574	31.3795	7.99098	21.7463	22.3666	31.4271	1.68375	0.751682	0.46283	0.690904
hsa-miR-183-5p	745.981	38.323	667.786	411.481	177.385	194.382	-1.85384	-0.890516	0.462917	0.690904
hsa-miR-22-3p	13859.7	959.244	12512.2	28912.2	3636.01	18526.8	1.86875	0.902072	0.468685	0.694306
hsa-miR-662	3.88909	19.4953	5.29132	5.77636	44.4236	2.03694	1.81491	0.859895	0.468609	0.694306
hsa-miR-27a-5p	33.826	2.53707	21.4892	70.1658	10.5255	17.1103	1.69152	0.758322	0.466087	0.694306
hsa-miR-5586-5p	9.22527	25.404	13.7142	15.1205	22.3666	42.2519	1.64346	0.716737	0.467298	0.694306
hsa-miR-548aa	6.51196	10.5822	5.83125	2.71829	6.19145	28.7499	1.63991	0.713614	0.466756	0.694306
hsa-miR-1266-5p	2.44198	88.8974	9.71875	10.7882	24.8432	19.4964	-1.83504	-0.875813	0.467746	0.694306
hsa-miR-4795-5p	13.0239	28.7423	6.91111	11.128	4.41141	12.92	-1.71645	-0.779431	0.4698	0.695094
hsa-miR-3925-3p	12.5717	19.295	11.4465	9.08927	5.95927	59.3622	1.71666	0.779601	0.47388	0.697673
hsa-miR-548q	7.59729	16.5911	5.83125	2.03871	10.835	5.81983	-1.61298	-0.689726	0.473215	0.697673
hsa-miR-6780a-3p	27.4949	18.6608	14.5781	10.3635	9.44196	17.2849	-1.63202	-0.706656	0.473459	0.697673
hsa-miR-4687-5p	9.04439	64.4615	9.50278	10.1936	27.8615	10.1847	-1.72443	-0.78612	0.473523	0.697673
hsa-miR-6499-3p	84.4746	16.057	68.8952	45.956	31.4216	23.6285	-1.67614	-0.745143	0.475699	0.69777
hsa-miR-3120-3p	4.79353	13.0192	6.58716	0.679572	0.154786	13.5602	-1.69311	-0.759678	0.474577	0.69777
hsa-miR-4286	796.268	22.9671	288.971	34.3184	430.151	121.285	-1.89184	-0.91979	0.475432	0.69777
hsa-miR-6784-5p	14.3806	35.4188	51.5094	3.99248	49.0672	1.86234	-1.84476	-0.883434	0.477195	0.699105
hsa-miR-6742-3p	26.3192	3.43839	16.0899	3.56775	76.1548	4.13208	1.82942	0.871385	0.483489	0.70193
hsa-miR-577	5.78841	0.734414	13.3903	14.4409	0.232179	19.5546	1.72171	0.783841	0.482022	0.70193
hsa-miR-4469	11.3055	43.6308	17.0618	20.9818	75.6131	24.5597	1.6783	0.746997	0.480217	0.70193
hsa-miR-324-3p	17.0939	2.06971	13.3903	9.17422	32.1181	9.54452	1.56528	0.646417	0.483767	0.70193
hsa-miR-671-5p	30.3891	52.4104	31.7479	40.6044	5.5723	23.2793	-1.6508	-0.723162	0.484414	0.70193
hsa-miR-624-3p	12.2099	69.5356	17.8177	25.9936	14.3951	18.7398	-1.68798	-0.755301	0.48094	0.70193
hsa-miR-4725-5p	7.05462	29.7438	5.72327	5.43657	5.6497	14.0258	-1.69821	-0.764013	0.484138	0.70193
hsa-miR-377-5p	70.9984	10.9494	37.9031	37.4614	14.3177	17.9833	-1.71684	-0.779755	0.481282	0.70193
hsa-miR-1293	12.6621	103.252	23.217	11.8925	42.1018	22.4645	-1.82164	-0.865238	0.484385	0.70193
hsa-miR-4433a-3p	37.7151	17.9931	7.0191	81.3787	5.5723	24.3269	1.77275	0.825992	0.487973	0.70232
hsa-miR-6793-5p	9.22527	5.04075	4.96736	3.6527	18.4196	8.26416	1.57859	0.658632	0.489653	0.70232
hsa-miR-6732-3p	18.4505	6.00884	20.3014	8.4097	8.74542	11.1741	-1.56787	-0.64881	0.488186	0.70232
hsa-miR-4426	7.95906	10.3486	7.45105	2.80323	7.19756	6.46001	-1.56795	-0.648881	0.486134	0.70232
hsa-miR-493-3p	31.8362	12.0844	34.3396	4.67206	29.6416	13.3856	-1.63817	-0.712083	0.488345	0.70232
hsa-miR-644a	13.4761	53.1782	29.5882	15.0355	34.9817	8.61334	-1.64455	-0.717693	0.490565	0.70232
hsa-miR-219b-5p	13.4761	55.949	31.6399	4.84195	32.2729	24.0359	-1.65366	-0.725667	0.490342	0.70232
hsa-miR-1913	91.6196	7.31075	78.9379	40.2646	10.0611	53.6588	-1.70937	-0.773466	0.490265	0.70232
hsa-miR-23a-5p	7.32595	45.0329	11.0146	8.66454	16.7943	11.6979	-1.71117	-0.77498	0.488776	0.70232
hsa-miR-2110	90.9865	88.597	62.9559	20.4721	98.831	17.9833	-1.76715	-0.821426	0.489316	0.70232
hsa-miR-4283	4.61264	18.2936	4.21146	5.01184	7.8941	4.36487	-1.58606	-0.665444	0.492079	0.702873
hsa-miR-4434	7.14507	47.7035	15.334	7.47529	26.5458	6.6346	-1.73015	-0.790894	0.492129	0.702873
hsa-miR-124-5p	2.44198	38.323	9.61077	1.95377	2.39919	25.1417	-1.70848	-0.772713	0.497237	0.70932
hsa-miR-7109-3p	16.099	17.7928	18.3576	5.69141	49.3768	30.5541	1.6384	0.712286	0.499756	0.711214
hsa-miR-625-3p	22.1587	2.77074	18.7896	6.79572	14.1629	7.27478	-1.54388	-0.62656	0.499248	0.711214
hsa-miR-10396a-3p	11.9386	119.643	15.55	5.09679	31.6538	44.0561	-1.82166	-0.865253	0.500988	0.712119
hsa-miR-4255	2.98465	24.5027	7.88299	1.1043	12.3055	8.03136	-1.65327	-0.725323	0.50421	0.715846
hsa-miR-1469	1.62799	36.1532	7.66702	22.256	46.2037	11.1159	1.74517	0.803365	0.507356	0.717912
hsa-miR-497-3p	5.78841	8.04517	3.45556	1.01936	9.36457	17.2849	1.59562	0.674114	0.50807	0.717912
hsa-miR-6747-3p	5.9693	20.4968	14.9021	10.7033	10.1385	6.46001	-1.52493	-0.608744	0.50774	0.717912
hsa-miR-3911	1.80888	38.2229	5.18334	10.1086	15.4786	1.22216	-1.69113	-0.757984	0.507769	0.717912
hsa-miR-1275	20.0785	12.0177	3.45556	2.97313	28.2485	25.8982	1.60522	0.682771	0.508898	0.718232
hsa-miR-6844	4.16042	30.6785	3.8875	2.97313	2.08961	17.6341	-1.70819	-0.772472	0.510604	0.71979
hsa-miR-147b-3p	14.5615	3.6053	3.99549	14.0162	2.70876	18.3907	1.5871	0.666391	0.511994	0.720897
hsa-miR-4510	152.669	26.4055	88.4407	76.197	26.8554	61.8648	-1.62133	-0.697181	0.512871	0.721281
hsa-miR-4757-5p	3.61775	25.8714	2.91563	7.73013	35.6782	12.047	1.70255	0.767696	0.515801	0.724549
hsa-miR-619-3p	6.15018	9.04664	4.21146	11.4678	6.65581	11.6979	1.50801	0.592647	0.517196	0.725655
hsa-miR-9901	4.61264	17.5592	3.77952	3.56775	6.34623	7.27478	-1.52154	-0.605531	0.517907	0.725799
hsa-miR-6781-5p	3.43687	10.3486	3.99549	9.17422	11.222	6.16902	1.46434	0.550251	0.52013	0.728061
hsa-miR-4422	24.7816	104.821	36.6073	154.518	25.0754	104.291	1.70628	0.770857	0.521122	0.728224
hsa-miR-6777-3p	23.6058	2.4703	6.69514	5.69141	2.16701	13.211	-1.5502	-0.632453	0.521467	0.728224
hsa-miR-8064	12.1195	2.37015	2.3757	0.254839	0.386965	28.6918	1.73953	0.798696	0.523249	0.729007
hsa-miR-6776-3p	4.06997	19.8292	3.34757	24.0398	5.34012	13.0946	1.54775	0.630175	0.522808	0.729007
hsa-miR-12130	16.1895	10.9828	21.8132	21.5764	4.10183	6.98379	-1.49944	-0.584427	0.524185	0.729461
hsa-miR-4477b	1.35666	16.5577	9.17882	28.8818	3.94705	10.7085	1.60059	0.678601	0.526854	0.731469
hsa-miR-3200-5p	28.2185	2.70398	14.6861	4.92689	7.12017	17.6923	-1.52853	-0.612148	0.526401	0.731469
hsa-miR-6774-3p	12.029	2.6706	12.2024	14.0162	4.02444	22.6973	1.52076	0.604797	0.529539	0.733492
hsa-miR-103a-3p	1249.12	22.1326	1152.97	296.208	208.961	826.066	-1.82095	-0.864692	0.529436	0.733492
hsa-miR-4529-5p	6.96418	12.218	9.07084	9.17422	9.20978	1.33856	-1.43994	-0.526009	0.531944	0.733652
hsa-miR-580-5p	6.51196	20.4301	20.8413	11.2129	10.6029	9.83551	-1.5133	-0.597698	0.531376	0.733652
hsa-miR-3153	4.34131	15.89	13.9302	11.2129	10.2159	0.290991	-1.5759	-0.65618	0.532727	0.733652
hsa-miR-5681a	6.15018	27.5739	7.45105	5.69141	11.6864	8.55515	-1.59658	-0.674983	0.53118	0.733652
hsa-miR-204-5p	1979.82	11.5837	1031.38	24.5495	1508.39	21.9989	-1.94397	-0.959004	0.532331	0.733652
hsa-miR-7847-3p	6.51196	25.9715	31.1	25.7388	3.17312	10.3011	-1.62269	-0.698391	0.535893	0.737161
hsa-miR-3150a-3p	7.05462	27.2735	3.77952	6.54088	6.19145	11.1159	-1.60528	-0.682825	0.538192	0.739472
hsa-miR-485-5p	105.277	3.87236	148.157	6.0312	467.222	4.01568	1.85489	0.891334	0.540971	0.740734
hsa-miR-7153-3p	3.34642	20.2631	6.80313	6.28604	0.541752	45.2783	1.71	0.773997	0.540023	0.740734
hsa-miR-5100	9.40616	142.977	13.8222	6.37098	17.1039	72.6314	-1.72986	-0.790656	0.540808	0.740734
hsa-miR-4696	17.8174	77.1802	19.1136	27.013	27.0102	18.2161	-1.58381	-0.663396	0.543278	0.74304
hsa-miR-503-5p	33.9165	2.50368	26.2406	44.9367	10.0611	40.797	1.53052	0.61402	0.544989	0.743549
hsa-miR-4776-5p	8.41128	12.1512	5.93924	7.05056	9.90632	1.97874	-1.41066	-0.496366	0.545294	0.743549
hsa-miR-7158-3p	17.9079	51.7762	31.6399	15.1205	36.22	14.375	-1.54508	-0.627679	0.545518	0.743549
hsa-miR-1307-5p	15.0137	0.901326	5.83125	2.97313	26.0041	5.23784	1.57543	0.655749	0.547313	0.744978
hsa-miR-4280	6.96418	10.4487	13.0663	8.49465	16.7169	20.1366	1.4919	0.57715	0.548556	0.744978
hsa-miR-130b-5p	78.2339	60.3888	96.8636	8.32475	114.851	21.417	-1.62848	-0.703524	0.549063	0.744978
hsa-miR-6750-5p	16.2799	176.86	19.3295	56.4894	15.169	56.5687	-1.65799	-0.729436	0.548376	0.744978
hsa-miR-642a-3p	4.43175	10.7825	3.99549	1.52904	29.8737	0.0581983	1.63305	0.707566	0.550268	0.745766
hsa-miR-4524a-3p	9.40616	39.7585	11.5545	11.6377	1.78004	26.0728	-1.53889	-0.621893	0.552221	0.747564
hsa-miR-6777-5p	11.0342	15.5562	8.74688	4.84195	15.2464	3.95748	-1.47625	-0.561937	0.554358	0.749607
hsa-miR-3665	4.25086	49.3392	5.39931	4.92689	8.28106	22.9301	-1.63463	-0.70896	0.556422	0.751547
hsa-miR-6819-3p	24.7816	92.4694	40.0629	12.2323	56.497	28.8081	-1.61427	-0.690882	0.559335	0.753776
hsa-miR-25-3p	34420.6	1963.09	48050.7	10854	28460	12289.6	-1.63621	-0.710356	0.55887	0.753776
hsa-miR-6514-3p	24.8721	17.7928	12.0945	7.98497	8.90021	20.0784	-1.47789	-0.563538	0.560231	0.754133
hsa-miR-3927-3p	76.7868	6.77663	116.085	193.253	40.7862	77.2291	1.55958	0.641153	0.561087	0.754435
hsa-miR-6813-3p	11.3055	19.6289	12.2024	11.2129	9.13239	46.1512	1.53982	0.622757	0.565062	0.758924
hsa-miR-31-3p	193.821	47.0025	168.134	424.817	47.2098	184.43	1.60539	0.682925	0.566104	0.75947
hsa-miR-6837-3p	7.14507	5.00737	11.7705	7.81507	11.3768	14.666	1.43686	0.522923	0.569011	0.761659
hsa-miR-29b-2-5p	35.0922	10.4487	6.47917	8.57959	22.2118	3.84109	-1.50239	-0.587261	0.568871	0.761659
hsa-miR-221-3p	9260.46	338.197	10583.7	10759.7	14695.6	7809.45	1.64821	0.720903	0.57074	0.762072
hsa-miR-125b-2-3p	12.2099	4.43986	17.3858	7.47529	2.63137	13.0946	-1.45854	-0.544524	0.571082	0.762072
hsa-miR-339-3p	136.389	4.33972	40.2788	57.3389	7.8941	47.0824	-1.61112	-0.688067	0.571235	0.762072
hsa-miR-4327	46.8499	10.8159	28.7243	32.5345	4.10183	22.1735	-1.46779	-0.553643	0.572125	0.762408
hsa-miR-4282	106.995	2.40354	56.2608	21.5764	249.283	6.57641	1.67481	0.743998	0.57526	0.764727
hsa-miR-4727-5p	14.8328	24.4026	22.6771	30.7506	22.057	37.5379	1.4558	0.541811	0.575357	0.764727
hsa-miR-298	5.42663	14.7884	5.39931	4.58711	5.10794	8.49695	-1.42044	-0.506334	0.575787	0.764727
hsa-miR-6737-5p	154.388	10.0481	103.559	252.716	34.4399	134.554	1.57385	0.654298	0.577251	0.76497
hsa-miR-200c-5p	27.0427	0.333824	9.50278	9.08927	0.386965	13.4438	-1.60684	-0.68423	0.576883	0.76497
hsa-miR-30a-5p	12587.3	588.032	4269.45	10225.7	612.566	18248.2	1.66734	0.73755	0.580155	0.765804
hsa-miR-511-5p	33.826	10.8827	3.8875	41.199	0.0773931	35.1518	1.57211	0.652705	0.580446	0.765804
hsa-miR-889-5p	6.78329	5.7084	16.4139	12.5721	12.6151	14.7242	1.39582	0.481108	0.579309	0.765804
hsa-miR-6765-3p	17.3652	7.07708	23.9729	11.4678	17.1813	5.47064	-1.41547	-0.501278	0.580027	0.765804
hsa-miR-184	8.77306	20.9308	13.0663	22.3409	5.03055	1.97874	-1.46176	-0.547707	0.582749	0.767577
hsa-let-7f-2-3p	21.9779	4.70692	13.3903	17.9237	2.32179	6.98379	-1.47026	-0.556074	0.583076	0.767577
hsa-miR-3176	8.95394	17.4924	5.83125	11.043	20.8961	15.5971	1.45741	0.543404	0.586249	0.770905
hsa-miR-323b-3p	121.918	0.701031	70.407	0.424732	109.976	2.03694	-1.71658	-0.779537	0.587345	0.771496
hsa-miR-4508	3.52731	13.7202	7.775	7.47529	26.8554	2.56072	1.4679	0.553758	0.591504	0.774205
hsa-miR-4446-3p	19.9881	23.3009	34.2316	47.4001	30.6477	34.2788	1.45238	0.538422	0.592649	0.774205
hsa-miR-4779	2.62287	18.4605	4.10347	7.3054	3.63748	6.751	-1.43483	-0.520879	0.590213	0.774205
hsa-miR-193b-5p	5.78841	48.0039	10.1507	4.58711	33.5112	3.08451	-1.55539	-0.637275	0.591372	0.774205
hsa-miR-6749-3p	13.2952	202.164	12.3104	33.6388	51.0021	58.1983	-1.59547	-0.673981	0.592498	0.774205
hsa-miR-6871-5p	3.16554	14.7884	5.07535	8.4097	18.2648	6.57641	1.42952	0.515528	0.597037	0.776848
hsa-miR-219b-3p	6.33107	17.5258	19.8695	11.043	10.6029	9.60272	-1.40186	-0.487344	0.596683	0.776848
hsa-miR-4786-3p	8.95394	34.4173	20.4094	7.64518	8.04888	28.459	-1.44497	-0.531039	0.596426	0.776848
hsa-miR-1253	15.285	189.813	22.3531	64.0496	45.0428	37.5961	-1.55181	-0.633949	0.597275	0.776848
hsa-miR-548s	11.215	9.48061	16.6299	25.9936	20.3544	6.98379	1.43006	0.516073	0.598451	0.777531
hsa-miR-27a-3p	6680.37	487.25	7671.23	13538.8	4172.34	5750.11	1.58107	0.660905	0.6006	0.778658
hsa-miR-4668-3p	6.87373	15.4895	10.3667	8.91938	9.28717	5.58703	-1.39404	-0.479277	0.600623	0.778658
hsa-miR-31-5p	2707.71	100.414	1775.62	3801.52	629.67	2876.51	1.59428	0.672907	0.606102	0.783866
hsa-miR-1261	40.6997	95.8744	29.8042	103.974	65.3198	83.3399	1.51496	0.59928	0.608123	0.783866
hsa-miR-6894-5p	3.25598	31.246	13.0663	28.7119	28.8676	10.5921	1.42779	0.513783	0.609678	0.783866
hsa-miR-1251-3p	8.13995	13.0192	12.5264	15.4603	9.67414	22.0571	1.39921	0.484609	0.610549	0.783866
hsa-miR-4711-5p	6.69285	17.893	3.67153	7.47529	12.6151	19.671	1.39662	0.481935	0.610424	0.783866
hsa-miR-668-5p	4.52219	7.81149	7.34306	14.1011	2.01222	11.2905	1.38919	0.474242	0.607278	0.783866
hsa-miR-521	5.33619	12.3515	6.58716	4.07743	5.88188	8.49695	-1.32585	-0.406919	0.606934	0.783866
hsa-miR-5696	3.43687	14.0206	7.88299	7.1355	1.70265	9.77731	-1.36536	-0.449276	0.608987	0.783866
hsa-let-7a-5p	219401	12471	222884	174214	48935.8	77322.3	-1.51347	-0.597864	0.607969	0.783866
hsa-miR-5591-3p	3.52731	27.9077	2.26771	4.41722	17.0265	0.174595	-1.56304	-0.644354	0.614837	0.788523
hsa-miR-548at-5p	9.49661	7.51105	13.8222	4.07743	4.4888	13.6184	-1.37824	-0.46283	0.615774	0.788878
hsa-miR-9-5p	41.6042	240.454	33.4757	147.807	20.277	37.2469	-1.53751	-0.620593	0.617451	0.790179
hsa-miR-4329	12.1195	34.3839	11.6625	12.742	6.88799	21.5334	-1.41683	-0.502665	0.621295	0.794124
hsa-miR-127-3p	57924.2	285.019	34220.8	227.062	54373.1	463.491	-1.6786	-0.747263	0.621864	0.794124
hsa-miR-4749-3p	11.215	17.2587	6.04723	1.44409	41.5601	8.49695	1.48871	0.574067	0.626255	0.798877
hsa-miR-181a-3p	85.7408	9.74767	134.659	143.135	81.1854	109.064	1.44928	0.535334	0.627854	0.800061
hsa-miR-3940-5p	37.5342	0.934708	16.0899	55.8948	9.90632	11.1741	1.41132	0.497049	0.637241	0.80558
hsa-miR-4723-5p	6.33107	12.5184	6.91111	7.56023	22.2118	5.70343	1.36782	0.451873	0.634951	0.80558
hsa-miR-7110-3p	14.5615	15.89	12.6344	5.43657	13.3116	13.3856	-1.33982	-0.422038	0.636567	0.80558
hsa-miR-130a-5p	7.4164	14.5547	5.83125	6.62582	3.71487	10.4175	-1.3474	-0.43018	0.634424	0.80558
hsa-miR-3688-3p	11.8481	5.64163	11.7705	8.23981	4.64359	8.49695	-1.35237	-0.435493	0.637582	0.80558
hsa-miR-7155-5p	5.1553	7.31075	22.8931	7.56023	15.7882	2.32793	-1.37555	-0.460009	0.636045	0.80558
hsa-miR-6783-5p	12.7526	116.839	26.9965	24.0398	63.6945	15.7135	-1.51531	-0.599615	0.635167	0.80558
hsa-miR-6165	209.83	881.397	534.855	577.381	71.0469	419.319	-1.52299	-0.606907	0.634697	0.80558
hsa-miR-8077	7.59729	19.3618	7.66702	15.3753	8.43585	0.989371	-1.40213	-0.487621	0.64139	0.808905
hsa-miR-6134	45.855	26.973	57.6646	28.3721	48.835	14.084	-1.42856	-0.514562	0.641569	0.808905
hsa-miR-1227-3p	12.6621	5.40795	18.2497	4.84195	16.5621	5.12145	-1.36477	-0.448662	0.64327	0.809389
hsa-miR-8068	25.5956	3.2381	7.0191	6.28604	15.4012	4.24847	-1.38061	-0.465306	0.643373	0.809389
hsa-miR-5008-5p	7.23551	177.194	9.61077	24.5495	55.3361	50.0505	-1.49422	-0.579392	0.644333	0.809389
hsa-miR-15a-3p	7.77817	108.66	12.9583	7.47529	75.0713	0.465586	-1.55961	-0.641189	0.644664	0.809389
hsa-miR-3941	7.23551	23.0673	11.4465	2.80323	13.8534	13.211	-1.4006	-0.486043	0.646526	0.810874
hsa-miR-3917	9.94883	3.27148	12.6344	2.80323	31.3442	2.09514	1.4031	0.488613	0.647794	0.811612
hsa-miR-6748-5p	7.77817	62.5587	11.5545	71.1002	13.9308	31.6017	1.42116	0.507074	0.649771	0.812384
hsa-miR-25-5p	8.0495	33.2489	17.9257	31.0055	15.943	36.0247	1.39627	0.481577	0.649096	0.812384
hsa-miR-6859-3p	4.43175	27.6073	2.26771	2.80323	5.6497	15.3061	-1.44771	-0.533773	0.651806	0.814075
hsa-miR-1297	13582	950.966	18683.7	12194.8	4142.85	6186.42	-1.47471	-0.560431	0.656358	0.818904
hsa-miR-10396a-5p	54.5377	122.246	61.1202	171.167	46.1263	121.343	1.42217	0.508096	0.657983	0.820075
hsa-miR-30a-3p	617.099	53.4119	657.744	974.251	383.096	620.044	1.48882	0.574165	0.66248	0.82202
hsa-miR-212-5p	14.5615	3.67207	40.9268	14.7807	44.3462	21.417	1.36405	0.4479	0.662595	0.82202
hsa-miR-6721-5p	4.34131	7.11046	8.42292	1.35914	9.36457	16.1209	1.35204	0.435135	0.66035	0.82202
hsa-miR-5681b	4.06997	13.7536	7.45105	0.594625	14.7047	3.3755	-1.35676	-0.440166	0.662986	0.82202
hsa-miR-3183	0.994883	17.4256	4.96736	2.88818	5.80448	8.55515	-1.36207	-0.4458	0.662809	0.82202
hsa-miR-202-3p	29.0325	0.901326	22.5691	20.9818	11.1446	6.34361	-1.36356	-0.447379	0.664769	0.823376
hsa-miR-7156-3p	23.6963	6.97693	2.69965	4.757	14.2403	5.52884	-1.36057	-0.444208	0.665747	0.823733
hsa-miR-6734-5p	15.0137	7.34414	9.28681	9.93874	33.279	0.407388	1.37784	0.462413	0.669292	0.827261
hsa-miR-3189-5p	27.4045	0.767796	4.21146	3.39786	2.70876	39.4002	1.40648	0.492091	0.671541	0.829183
hsa-miR-2861	3.52731	19.5287	2.48368	3.22797	28.4033	3.84109	1.38185	0.466602	0.675487	0.833194
hsa-miR-6867-3p	4.79353	18.9278	4.31945	12.1473	6.26884	18.6816	1.31335	0.393249	0.678761	0.836368
hsa-miR-4746-5p	5.87885	17.3255	5.93924	7.81507	7.12017	23.3957	1.30854	0.387963	0.681001	0.837071
hsa-miR-5701	8.8635	20.2631	12.9583	13.2516	11.8411	7.50758	-1.30444	-0.383427	0.681435	0.837071
hsa-miR-5572	49.5632	11.0496	7.88299	11.043	33.1242	6.8092	-1.34356	-0.426058	0.68006	0.837071
hsa-miR-335-3p	125.898	805.451	133.255	599.127	23.7597	932.104	1.4605	0.546461	0.684645	0.838345
hsa-miR-3190-5p	6.05974	11.35	7.34306	19.028	10.0611	2.90991	1.28458	0.361301	0.68528	0.838345
hsa-miR-623	9.13483	6.8434	14.1462	15.885	3.09572	3.84109	-1.31995	-0.400483	0.685103	0.838345
hsa-miR-6759-5p	41.8755	5.54148	39.415	3.90754	57.1935	0.581983	-1.40739	-0.493018	0.684102	0.838345
hsa-miR-5009-5p	34.7304	13.1527	26.7806	31.1754	22.7536	46.7914	1.35384	0.437061	0.68705	0.838677
hsa-miR-374b-3p	33.7356	13.2528	14.5781	12.657	29.2546	40.7388	1.34482	0.427408	0.686845	0.838677
hsa-miR-6873-3p	10.2202	15.7231	12.5264	6.54088	4.79837	18.0997	-1.30493	-0.383977	0.687659	0.838677
hsa-miR-4433b-3p	17.2748	17.025	8.74688	24.3796	4.64359	3.55009	-1.3253	-0.406319	0.689312	0.839836
hsa-miR-191-5p	7502.59	389.907	6842.33	2565.47	4452.43	3415.6	-1.41225	-0.497998	0.693267	0.843792
hsa-miR-130a-3p	620.626	16.6578	704.178	305.128	63.4623	570.343	-1.42862	-0.514623	0.694414	0.844329
hsa-miR-1286	1462.75	4659.12	3526.4	3707.32	860.843	2383.34	-1.38796	-0.472963	0.695395	0.844661
hsa-miR-4658	11.3055	11.2165	6.47917	7.05056	10.0611	6.46001	-1.24722	-0.318718	0.696172	0.844746
hsa-miR-487b-3p	198.886	10.1149	254.307	15.9699	296.106	5.47064	-1.45894	-0.544921	0.69863	0.846867
hsa-miR-493-5p	39.4335	3.43839	19.4375	1.2742	42.6436	1.86234	-1.36064	-0.444281	0.702527	0.850727
hsa-miR-1229-3p	4.25086	7.67796	11.8785	8.57959	5.88188	16.1791	1.29249	0.370152	0.707539	0.855928
hsa-miR-574-5p	307.419	25.7712	298.15	372.405	349.894	137.057	1.36132	0.44501	0.711998	0.859
hsa-miR-3195	10.401	48.6382	26.0247	5.01184	50.7699	8.55515	-1.32351	-0.404369	0.712956	0.859
hsa-miR-4732-5p	31.6554	15.4227	20.7333	3.14302	31.112	16.7611	-1.32807	-0.40933	0.712682	0.859
hsa-miR-615-3p	18.2697	85.192	14.6861	7.90002	64.778	14.375	-1.35871	-0.442234	0.712035	0.859
hsa-miR-154-5p	123.456	2.63721	132.067	88.3443	71.5112	31.1943	-1.35102	-0.434044	0.714168	0.859593
hsa-miR-6842-3p	18.1792	3.0378	15.334	16.7345	15.8656	13.2692	1.26053	0.334035	0.714899	0.859607
hsa-miR-635	5.1553	11.1497	9.07084	8.83443	8.9776	2.67712	-1.2484	-0.320083	0.71711	0.861398
hsa-miR-128-3p	122.19	13.6868	200.206	97.1787	78.7862	78.6841	-1.31929	-0.399757	0.718332	0.861999
hsa-miR-601	99.3978	11.6171	47.8379	89.6185	28.0163	91.3713	1.31644	0.396642	0.721004	0.862757
hsa-miR-4531	4.43175	30.0108	5.72327	14.9506	12.1507	25.7236	1.30867	0.388098	0.721132	0.862757
hsa-miR-4752	20.8021	3.63869	5.93924	7.64518	6.34623	9.77731	-1.27316	-0.348413	0.720649	0.862757
hsa-miR-4431	51.553	209.441	42.3306	76.6217	161.519	173.489	1.35605	0.439409	0.724875	0.863433
hsa-miR-6749-5p	3.97953	23.8017	2.15972	4.58711	14.9369	20.3694	1.32583	0.4069	0.72405	0.863433
hsa-miR-6508-3p	8.32084	10.2484	9.50278	3.14302	25.6171	6.8674	1.26735	0.341813	0.72427	0.863433
hsa-miR-331-3p	60.8687	63.2931	51.0775	41.8786	45.7393	47.8972	-1.2999	-0.378405	0.724345	0.863433
hsa-miR-6747-5p	795.635	7.11046	427.409	72.7991	492.375	321.196	-1.3878	-0.472797	0.725312	0.863433
hsa-miR-1292-5p	27.9472	174.49	39.415	58.3582	43.7271	81.1284	-1.32114	-0.401783	0.727537	0.865218
hsa-miR-1233-3p	6.15018	14.3211	3.34757	4.16238	9.44196	5.70343	-1.24687	-0.31831	0.730168	0.867483
hsa-miR-6780b-3p	7.23551	14.0206	17.1698	5.35163	6.88799	18.2743	-1.25568	-0.328468	0.731955	0.868742
hsa-miR-4321	13.1144	39.5916	17.8177	12.2323	27.0102	15.2479	-1.29923	-0.377654	0.733235	0.869397
hsa-miR-541-5p	55.3516	158.366	25.1608	242.182	40.7862	33.8714	1.3255	0.406535	0.73505	0.869821
hsa-miR-3185	5.42663	13.0192	7.23507	6.96561	7.19756	17.9251	1.24292	0.313735	0.734695	0.869821
hsa-miR-766-3p	48.3875	8.97988	30.2361	6.88066	48.2159	12.5126	-1.29479	-0.372721	0.738164	0.872642
hsa-miR-4294	44.4984	462.213	78.29	31.1754	372.725	20.544	-1.3785	-0.463101	0.73919	0.87299
hsa-miR-561-5p	8.13995	5.67501	7.66702	13.4215	0.928717	12.629	1.25683	0.329788	0.7402	0.873319
hsa-miR-7974	10.8533	12.8189	14.6861	10.5334	23.6823	13.0364	1.23203	0.301034	0.741905	0.87431
hsa-miR-1265	9.76794	10.5822	6.15521	13.2516	9.05499	10.6503	1.21876	0.28541	0.743237	0.87431
hsa-miR-491-5p	7.86862	47.8037	6.37118	12.9968	23.6823	11.4651	-1.29307	-0.370795	0.743139	0.87431
hsa-miR-513a-5p	18.4505	5.24104	9.93473	19.8775	4.56619	17.3431	1.24575	0.317016	0.744011	0.87436
hsa-miR-3064-3p	29.8465	5.17428	0.971875	7.73013	2.78615	17.9251	-1.26427	-0.338309	0.746366	0.876264
hsa-miR-6728-5p	32.9216	5.40795	30.2361	20.3022	52.0082	15.6553	1.28473	0.361469	0.749055	0.878222
hsa-miR-542-5p	28.8516	12.1846	27.8604	16.9043	34.4399	3.2591	-1.26142	-0.335045	0.749504	0.878222
hsa-miR-3155a	705.462	46.9691	691.111	866.284	278.925	785.793	1.33776	0.419818	0.752348	0.88069
hsa-miR-4713-5p	4.61264	19.729	11.2306	11.3828	8.28106	9.60272	-1.22422	-0.291859	0.753367	0.881019
hsa-miR-4496	20.8021	10.7158	13.8222	20.8968	8.12628	8.26416	-1.21593	-0.282064	0.754277	0.88122
hsa-miR-505-5p	8.50172	10.6824	34.5556	20.1323	38.6192	8.26416	1.24853	0.320231	0.755807	0.882144
hsa-miR-507	11.6673	8.5459	10.2587	6.0312	7.50713	11.1741	-1.21315	-0.278757	0.75693	0.882592
hsa-miR-147a	12.7526	11.1831	4.10347	6.88066	5.72709	10.9995	-1.19135	-0.252598	0.758119	0.883116
hsa-miR-3170	18.541	14.3544	11.3385	5.35163	44.9654	6.05262	1.27329	0.348559	0.759313	0.883645
hsa-miR-578	17.4557	11.784	8.96285	10.7033	8.51324	12.5126	-1.20177	-0.265159	0.763289	0.885776
hsa-miR-3977	33.1929	3.07118	7.99098	8.32475	15.2464	12.2216	-1.23416	-0.303527	0.76322	0.885776
hsa-miR-9902	0.180888	15.9568	2.05174	0.509679	7.8941	5.99442	-1.26835	-0.342954	0.76337	0.885776
hsa-miR-29a-3p	648.483	45.0663	423.198	904.68	63.7719	493.812	1.30944	0.38895	0.766778	0.888867
hsa-miR-4782-5p	5.1553	20.2631	9.28681	19.2828	2.39919	6.92559	-1.21827	-0.284832	0.768112	0.88955
hsa-miR-1225-3p	4.88397	9.01326	17.2778	3.39786	11.5316	22.8137	1.21381	0.27954	0.76892	0.889623
hsa-miR-609	2.2611	25.4708	9.61077	16.3947	7.58452	6.11082	-1.2469	-0.318341	0.770353	0.890418
hsa-miR-12121	17.2748	7.51105	11.0146	11.8076	16.0204	2.32793	-1.1874	-0.24781	0.773538	0.893235
hsa-miR-10399-3p	5.60752	11.8841	12.4184	6.88066	18.11	10.9413	1.19888	0.261683	0.775982	0.89519
hsa-miR-126-5p	1172.79	119.442	1473.47	1733.16	110.982	1726.98	1.29124	0.368761	0.782527	0.901
hsa-miR-7-5p	4769.11	410.838	4930	6813.56	1567.44	4506.82	1.27478	0.350244	0.7821	0.901
hsa-miR-1306-5p	73.7118	5.00737	58.5285	52.327	25.1528	91.8951	1.23494	0.304445	0.784102	0.901076
hsa-miR-890	3.97953	95.5739	14.1462	16.8194	52.2403	20.7768	-1.26713	-0.34156	0.783845	0.901076
hsa-miR-342-5p	15.8277	18.7275	17.7097	25.9087	13.8534	23.8613	1.21479	0.280706	0.790238	0.903491
hsa-miR-3616-5p	10.5819	8.47914	10.2587	9.76884	7.27495	7.33298	-1.18517	-0.245091	0.790372	0.903491
hsa-miR-6779-3p	5.9693	12.3181	14.6861	5.60647	16.4847	5.70343	-1.18785	-0.248351	0.789612	0.903491
hsa-miR-5580-5p	5.51708	14.9219	3.67153	6.79572	2.86354	10.7667	-1.18817	-0.248747	0.790744	0.903491
hsa-miR-3691-3p	16.6417	80.5184	22.5691	17.499	37.6904	42.1356	-1.23214	-0.301168	0.788078	0.903491
hsa-miR-3192-3p	8.59217	73.0408	8.63889	12.4871	31.499	29.1573	-1.23634	-0.306081	0.789598	0.903491
hsa-miR-425-3p	29.1229	18.4271	26.2406	53.5163	15.8656	21.0678	1.22609	0.294065	0.792111	0.904188
hsa-miR-5192	13.5666	16.6245	16.4139	8.74949	17.4908	13.2692	-1.17996	-0.238738	0.795473	0.906817
hsa-miR-548ac	8.13995	9.98135	5.93924	1.86882	6.81059	11.6397	-1.18379	-0.243413	0.795933	0.906817
hsa-miR-3184-5p	323.699	84.6912	430.433	335.623	121.894	223.772	-1.231	-0.299834	0.797484	0.907717
hsa-miR-4655-3p	5.42663	10.0481	19.7615	3.56775	19.1161	7.10019	-1.18151	-0.240629	0.798676	0.908209
hsa-miR-5587-5p	22.5205	1.36868	2.26771	4.24732	15.7882	11.2905	1.19914	0.261995	0.803666	0.908606
hsa-miR-744-3p	48.1161	34.2838	33.4757	72.5443	17.723	48.5956	1.19828	0.260959	0.80625	0.908606
hsa-miR-4662a-5p	8.95394	11.6839	24.1889	8.91938	29.0224	14.7242	1.17752	0.23575	0.801171	0.908606
hsa-miR-3663-5p	12.5717	5.1409	9.61077	5.86131	4.41141	12.8036	-1.17334	-0.230623	0.801767	0.908606
hsa-miR-647	28.7612	9.78105	11.9865	24.8044	6.65581	11.4069	-1.17821	-0.236602	0.804465	0.908606
hsa-miR-607	20.2594	52.6775	43.0865	11.6377	31.4216	53.8334	-1.19744	-0.259954	0.804247	0.908606
hsa-miR-450a-1-3p	64.8483	30.0776	9.17882	34.2334	19.6578	32.1836	-1.20974	-0.274692	0.805543	0.908606
hsa-miR-218-5p	265.815	44.3319	224.719	192.574	171.813	71.3511	-1.22729	-0.29547	0.802848	0.908606
hsa-miR-1471	10.5819	77.1134	9.3948	10.3635	17.5682	51.1563	-1.22896	-0.297441	0.800486	0.908606
hsa-miR-323a-3p	169.854	6.50958	148.697	2.63334	250.212	0.290991	-1.28409	-0.360747	0.806635	0.908606
hsa-miR-3928-3p	5.78841	14.1208	2.05174	3.31291	5.5723	9.95191	-1.17354	-0.23087	0.807496	0.908718
hsa-miR-6888-3p	4.79353	17.0918	6.69514	16.1398	4.4888	13.3856	1.18183	0.241027	0.809205	0.909784
hsa-miR-95-5p	4.79353	28.809	8.85487	5.60647	23.1405	6.46001	-1.21056	-0.275674	0.810761	0.910676
hsa-miR-16-2-3p	31.7458	0.634266	54.641	45.4464	18.6517	39.5166	1.19146	0.252735	0.816349	0.911469
hsa-miR-509-3p	12.5717	4.67354	5.39931	6.62582	1.47047	18.3907	1.17249	0.229574	0.816811	0.911469
hsa-miR-6825-5p	2.2611	16.9249	7.45105	6.88066	6.65581	9.42812	-1.16759	-0.223531	0.815402	0.911469
hsa-miR-6867-5p	5.51708	18.8611	7.66702	20.3022	6.26884	0.465586	-1.18915	-0.249935	0.816205	0.911469
hsa-miR-4536-5p	305.067	109.261	293.074	315.831	69.4216	198.747	-1.21113	-0.276351	0.812822	0.911469
hsa-miR-1180-3p	435.487	43.0967	545.006	95.5648	619.996	114.825	-1.23259	-0.301696	0.816039	0.911469
hsa-miR-541-3p	100.393	5.94207	95.8917	2.29355	160.126	0.814776	-1.23879	-0.308931	0.816589	0.911469
hsa-miR-3611	9.13483	10.9828	2.48368	4.67206	5.03055	16.2955	1.1464	0.19711	0.821761	0.914429
hsa-miR-3646	1.80888	15.7231	6.2632	6.96561	2.63137	10.9413	-1.164	-0.219087	0.821129	0.914429
hsa-miR-1304-3p	14.9232	0.934708	26.0247	6.54088	23.6049	5.41244	-1.17602	-0.233916	0.821678	0.914429
hsa-miR-487a-5p	72.4455	4.43986	54.857	8.74949	93.6457	54.9392	1.19478	0.256751	0.830596	0.918803
hsa-miR-1299	4.61264	10.215	4.64341	5.77636	4.02444	12.8618	1.15542	0.208419	0.829163	0.918803
hsa-miR-4668-5p	4.88397	17.9598	5.93924	11.128	13.776	8.55515	1.14907	0.200471	0.830439	0.918803
hsa-miR-3662	11.0342	8.07855	16.9538	11.9775	4.95316	14.8406	-1.12803	-0.173804	0.831078	0.918803
hsa-miR-4479	3.88909	14.054	1.51181	3.31291	3.79226	9.95191	-1.14843	-0.199665	0.827089	0.918803
hsa-miR-1291	11.8481	49.0722	26.4566	8.4097	33.8208	32.6492	-1.16823	-0.224326	0.829208	0.918803
hsa-miR-501-3p	46.9404	0.467354	24.0809	30.2409	5.18534	25.3744	-1.17511	-0.2328	0.828322	0.918803
hsa-miR-628-3p	21.5256	0.200295	33.3677	2.97313	61.7597	1.62955	1.20483	0.268825	0.833183	0.91963
hsa-miR-6788-3p	1.17577	19.7958	0.863889	16.2248	0.851324	1.39676	-1.18783	-0.248328	0.833367	0.91963
hsa-miR-877-3p	5.33619	78.9495	9.50278	52.9216	4.25662	54.9392	1.194	0.255801	0.836685	0.921757
hsa-miR-595	7.86862	50.4742	18.6816	8.15486	45.9715	11.9306	-1.16806	-0.224119	0.836838	0.921757
hsa-miR-514a-3p	80.7664	4.43986	1.94375	19.7076	2.63137	82.2342	1.20016	0.263224	0.838796	0.922026
hsa-miR-7106-5p	5.1553	15.7565	4.42743	3.14302	18.2648	7.97316	1.1521	0.204263	0.838888	0.922026
hsa-miR-7109-5p	12.2099	20.7305	5.93924	2.54839	25.5397	5.35424	-1.16561	-0.221088	0.839399	0.922026
hsa-miR-432-5p	324.332	11.0162	257.979	11.3828	700.64	8.72974	1.21478	0.280693	0.843318	0.923544
hsa-miR-4691-5p	7.95906	11.5503	12.3104	15.2904	3.09572	9.95191	-1.12439	-0.169148	0.842979	0.923544
hsa-miR-1321	15.3755	7.21061	7.34306	12.0624	8.43585	5.87803	-1.13458	-0.182153	0.843057	0.923544
hsa-miR-203b-5p	5.60752	14.1208	3.67153	1.95377	3.56008	15.0152	-1.14264	-0.192372	0.843875	0.923544
hsa-miR-7851-3p	3.07509	16.758	6.15521	11.7226	0.386965	17.9833	1.15493	0.207808	0.850536	0.929131
hsa-miR-218-1-3p	53.4523	238.484	56.0448	60.9916	189.768	45.1037	-1.1768	-0.23487	0.850156	0.929131
hsa-miR-7159-5p	9.67749	15.8567	15.442	8.32475	14.4725	23.2793	1.12525	0.170246	0.85445	0.931701
hsa-miR-409-3p	392.617	10.5155	484.534	7.22045	721.845	4.07388	-1.21076	-0.275908	0.853695	0.931701
hsa-miR-4760-3p	1.4471	15.7565	4.75139	6.62582	3.01833	9.89371	-1.13057	-0.177046	0.856418	0.932995
hsa-miR-548a-5p	24.3294	12.2514	47.19	38.3958	26.0041	30.7869	1.13977	0.188737	0.85983	0.935858
hsa-miR-4722-5p	9.40616	15.3225	7.775	11.4678	12.0733	13.5602	1.12061	0.164278	0.863356	0.938841
hsa-miR-4727-3p	3.43687	30.6785	2.48368	4.84195	29.719	7.50758	1.14506	0.19542	0.865694	0.940526
hsa-miR-26b-3p	36.4489	9.94797	8.63889	10.7882	0.386965	37.1887	-1.13728	-0.185592	0.868612	0.942839
hsa-miR-6857-5p	14.1997	11.9509	10.7986	11.8925	17.1813	4.36487	-1.10814	-0.148138	0.872069	0.945053
hsa-miR-6760-3p	6.96418	36.3201	24.8368	28.7119	10.1385	21.9408	-1.12278	-0.167073	0.872235	0.945053
hsa-miR-4462	8.41128	31.4463	4.85938	13.3366	14.0855	12.4544	-1.12805	-0.173825	0.87591	0.948175
hsa-miR-324-5p	115.497	0.667649	66.1955	11.5527	120.037	27.5278	-1.1459	-0.196482	0.878209	0.949802
hsa-miR-10392-5p	2.80376	12.5184	5.18334	10.2785	5.03055	7.33298	1.09015	0.124522	0.879093	0.949897
hsa-miR-6894-3p	30.9318	8.24546	5.83125	25.4839	7.8941	16.4119	1.1066	0.14614	0.87995	0.949964
hsa-miR-193a-5p	40.2475	210.343	72.2427	96.1594	188.22	79.7316	1.12704	0.172532	0.886482	0.95103
hsa-miR-1226-3p	12.5717	2.90427	15.55	0.339786	34.053	0.465586	1.12376	0.168335	0.887933	0.95103
hsa-miR-7108-5p	23.9676	53.4119	37.1472	34.4883	51.9308	41.2626	1.11136	0.152322	0.886069	0.95103
hsa-miR-4525	2.8942	14.8552	6.37118	8.91938	8.43585	4.94685	-1.09364	-0.129132	0.888106	0.95103
hsa-miR-6845-3p	21.4352	11.9509	14.1462	8.32475	18.8839	16.0045	-1.09528	-0.131297	0.88692	0.95103
hsa-miR-4781-3p	11.1246	49.1056	16.6299	23.7001	31.4216	14.3168	-1.11096	-0.151803	0.886512	0.95103
hsa-miR-6761-5p	3.34642	35.0849	7.55903	10.7033	27.9389	2.73532	-1.11485	-0.156856	0.884595	0.95103
hsa-miR-3136-3p	15.1946	26.3721	5.50729	19.113	0	22.0571	-1.14424	-0.194387	0.881787	0.95103
hsa-miR-379-3p	211.006	3.8056	262.73	1.18925	406.236	0.465586	-1.17074	-0.227419	0.883643	0.95103
hsa-miR-629-5p	10.2202	11.9175	13.1743	14.271	21.4379	3.20091	1.09987	0.137334	0.88963	0.951808
hsa-miR-6734-3p	12.6621	72.3731	10.4747	13.5065	47.9837	24.7343	-1.10977	-0.150256	0.893991	0.955618
hsa-miR-532-5p	446.431	30.7118	559.368	477.739	277.377	395.806	1.11049	0.151191	0.904542	0.95675
hsa-miR-4774-3p	90.6248	10.7825	2.69965	55.3001	3.79226	56.3359	1.10882	0.149021	0.905137	0.95675
hsa-miR-7151-5p	6.42151	16.2906	8.31493	14.4409	2.08961	17.2849	1.0867	0.119952	0.904962	0.95675
hsa-miR-6869-5p	9.04439	10.7491	9.3948	6.71077	16.7169	8.08956	1.07554	0.105064	0.905467	0.95675
hsa-miR-3154	6.6024	10.5822	8.96285	8.06991	11.2994	5.35424	-1.07029	-0.0980046	0.900058	0.95675
hsa-miR-1587	18.8123	4.1728	11.4465	9.85379	9.20978	12.6872	-1.0776	-0.107816	0.903698	0.95675
hsa-miR-562	6.05974	8.71282	10.9066	6.62582	7.19756	9.71911	-1.08101	-0.112385	0.904623	0.95675
hsa-miR-6740-5p	14.7424	9.3137	3.02361	7.22045	2.32179	15.4225	-1.08468	-0.117263	0.903685	0.95675
hsa-miR-3151-3p	11.0342	5.47472	10.9066	9.17422	14.0855	1.86234	-1.09062	-0.125144	0.897506	0.95675
hsa-miR-339-5p	63.8534	20.2631	35.0955	17.1592	9.59674	81.4776	-1.10046	-0.138111	0.902176	0.95675
hsa-miR-329-3p	47.6639	55.515	53.8851	24.5495	86.9898	30.9033	-1.10301	-0.141445	0.898386	0.95675
hsa-miR-4480	12.3908	2.57045	64.8997	27.4377	0.309572	44.2307	-1.10886	-0.149071	0.901963	0.95675
hsa-miR-425-5p	1419.7	41.0938	634.635	646.018	319.788	910.046	-1.11701	-0.159648	0.905301	0.95675
hsa-miR-3148	7.50684	27.5405	9.93473	17.9237	24.611	6.8092	1.09105	0.125721	0.910242	0.957453
hsa-miR-4533	4.16042	17.192	7.55903	5.77636	7.12017	18.5071	1.08153	0.11308	0.909021	0.957453
hsa-miR-1305	38.3482	20.9642	15.874	3.99248	64.1589	0.523784	-1.09511	-0.131071	0.910254	0.957453
hsa-miR-6778-3p	3.7082	72.6736	12.3104	55.7249	7.66192	17.6341	-1.09636	-0.132726	0.910944	0.957453
hsa-miR-6853-5p	4.16042	47.837	4.85938	5.01184	2.2444	44.1143	-1.108	-0.147962	0.907294	0.957453
hsa-miR-196a-5p	1465.19	68.3005	1284.82	1120.61	826.868	595.718	-1.10815	-0.148149	0.909094	0.957453
hsa-miR-4650-5p	4.61264	33.3824	13.9302	11.2979	30.0285	14.8988	1.07916	0.109907	0.912302	0.958037
hsa-miR-1264	9.58705	100.782	41.1427	15.7151	29.2546	121.343	1.09721	0.133844	0.9173	0.960751
hsa-miR-3610	8.59217	11.4168	10.2587	7.73013	15.0143	5.81983	-1.06563	-0.0917007	0.916892	0.960751
hsa-miR-3605-3p	38.4386	7.27737	28.7243	10.4484	28.8676	29.6229	-1.0774	-0.107553	0.916557	0.960751
hsa-miR-4795-3p	2.35154	7.94502	22.5691	1.61398	30.2607	3.3755	1.07294	0.101575	0.923881	0.965591
hsa-miR-5001-3p	13.0239	14.488	13.9302	18.9431	15.8656	9.42812	1.06019	0.0843227	0.924347	0.965591
hsa-miR-1200	17.8174	24.8699	25.2688	17.7538	27.4746	18.2743	-1.07298	-0.101618	0.922783	0.965591
hsa-miR-6125	195.178	326.046	100.211	29.7313	10.3707	640.006	1.09438	0.130115	0.926755	0.965851
hsa-miR-4266	0.633107	17.9598	2.05174	7.47529	10.5255	4.24847	1.06986	0.0974284	0.927751	0.965851
hsa-miR-302a-3p	27.4949	3.00442	19.5455	7.47529	34.1304	11.5233	1.06324	0.0884658	0.92945	0.965851
hsa-miR-6757-3p	11.5768	6.91016	10.5826	5.86131	16.1752	8.55515	1.05783	0.0811084	0.926083	0.965851
hsa-miR-6744-5p	5.33619	11.7172	6.69514	10.8731	2.70876	9.07893	-1.05493	-0.077144	0.929219	0.965851
hsa-miR-6738-3p	15.6468	37.5219	32.2879	25.2291	34.053	20.7186	-1.07131	-0.0993696	0.928016	0.965851
hsa-miR-323a-5p	22.0683	14.3211	30.7761	8.15486	61.4501	2.56072	1.07453	0.103704	0.93139	0.967026
hsa-miR-2681-5p	17.4557	14.5214	12.7424	1.86882	26.3137	19.38	1.0637	0.0890924	0.932268	0.967096
hsa-miR-34a-3p	4.70308	13.5533	8.09896	4.33227	19.1935	4.48127	1.05747	0.0806233	0.934001	0.967213
hsa-miR-6722-5p	2.35154	28.0079	1.61979	9.17422	0.154786	20.3694	-1.07901	-0.109707	0.93328	0.967213
hsa-miR-7161-3p	2.62287	33.5494	9.07084	7.05056	8.20367	32.9402	1.06298	0.0881154	0.934879	0.967283
hsa-miR-3661	6.51196	11.5837	6.47917	2.20861	15.556	5.64523	-1.054	-0.0758744	0.935734	0.96733
hsa-miR-1202	20.0785	9.44723	9.28681	15.7151	13.6986	11.2323	1.04924	0.0693407	0.937821	0.968649
hsa-miR-29c-5p	109.889	300.542	164.247	138.548	192.09	283.309	1.06792	0.0948071	0.940044	0.969268
hsa-miR-3173-5p	12.3908	5.07413	13.3903	5.52152	13.002	10.6503	-1.04856	-0.0684052	0.939993	0.969268
hsa-miR-5010-3p	37.8055	9.41385	28.4004	11.3828	46.9002	13.211	-1.05656	-0.0793797	0.942064	0.970513
hsa-miR-638	4.61264	48.5714	15.0101	38.7356	22.057	11.4069	1.05584	0.0783914	0.944137	0.970585
hsa-miR-3942-3p	5.60752	16.7246	8.85487	9.00432	0	23.9195	1.05486	0.0770536	0.948637	0.970585
hsa-miR-455-5p	18.9932	5.87531	25.5927	14.8656	37.4583	0.698379	1.05111	0.0719159	0.946749	0.970585
hsa-miR-361-5p	129.244	29.4099	78.9379	117.056	30.1059	102.429	1.05097	0.071718	0.947363	0.970585
hsa-miR-203a-5p	5.42663	12.5518	3.56354	4.67206	15.2464	2.73532	1.04324	0.0610677	0.948145	0.970585
hsa-miR-4265	21.8874	3.43839	4.31945	5.43657	13.5438	9.31172	-1.04559	-0.0643189	0.948006	0.970585
hsa-miR-5691	25.9574	32.6814	8.09896	6.28604	52.0082	4.94685	-1.05662	-0.079463	0.945016	0.970585
hsa-miR-6758-5p	3.7082	29.9774	1.51181	8.32475	17.4908	7.56578	-1.0592	-0.0829807	0.943221	0.970585
hsa-miR-3190-3p	11.215	9.94797	5.72327	4.16238	10.0611	11.7561	-1.03581	-0.0507543	0.950727	0.971618
hsa-miR-103a-1-5p	10.0393	6.50958	9.61077	18.1785	1.62526	5.29604	-1.04276	-0.060414	0.951274	0.971618
hsa-miR-3714	3.79864	10.4153	4.75139	3.99248	2.94094	12.8618	1.03914	0.0553883	0.955289	0.974885
hsa-miR-4768-5p	13.2952	4.10604	11.7705	3.90754	12.6151	11.4651	-1.03563	-0.0505094	0.957649	0.976459
hsa-miR-3677-5p	6.24063	20.7305	3.23958	15.5452	9.20978	4.71406	-1.03331	-0.0472663	0.960748	0.978783
hsa-miR-7160-5p	3.88909	11.7506	4.42743	3.6527	14.7821	2.38613	1.02977	0.0423166	0.962269	0.979496
hsa-miR-155-5p	729.339	19.729	1386.11	602.185	1238.06	388.008	1.04362	0.0615907	0.963882	0.979563
hsa-miR-6764-3p	10.3106	22.6333	15.0101	13.5065	21.0509	12.1634	-1.03426	-0.0486044	0.963975	0.979563
hsa-miR-22-5p	48.5684	13.0859	53.3452	57.084	18.9613	42.3683	1.03105	0.0441084	0.965554	0.980333
hsa-miR-1273h-5p	4.34131	13.3864	8.31493	6.71077	11.4542	8.84614	1.02665	0.0379481	0.966405	0.980364
hsa-miR-543	68.3756	2.70398	65.0077	20.9818	87.609	23.2211	-1.03201	-0.0454599	0.967452	0.980592
hsa-miR-944	0.361775	19.7624	6.04723	14.8656	5.03055	7.04199	1.02478	0.0353117	0.974224	0.984535
hsa-miR-181a-2-3p	30.8414	3.0378	29.3722	9.93874	45.9715	8.78794	1.02385	0.0340054	0.973496	0.984535
hsa-miR-4708-3p	11.3959	13.6534	10.3667	8.91938	8.51324	18.7398	1.02141	0.0305667	0.97373	0.984535
hsa-miR-4764-3p	5.42663	12.4516	4.64341	1.86882	5.6497	15.5389	1.02097	0.0299374	0.97464	0.984535
hsa-miR-6803-3p	16.3703	18.9612	13.3903	20.8119	5.26273	23.6867	1.02032	0.0290169	0.976902	0.985986
hsa-miR-4524b-3p	10.2202	47.2028	12.5264	6.62582	57.4257	7.50758	1.02123	0.0303096	0.977922	0.986182
hsa-miR-6131	2287.96	175.992	2303.88	331.036	4167.85	381.141	1.02354	0.033565	0.979693	0.986301
hsa-miR-4435	17.0034	26.1051	17.8177	10.8731	39.2383	12.047	1.01803	0.0257804	0.979407	0.986301
hsa-miR-4276	3.79864	17.3589	9.3948	7.90002	3.4053	19.8456	1.01721	0.0246232	0.98062	0.986403
hsa-miR-3159	2.53243	14.5214	1.40382	8.4097	9.82892	0	-1.01624	-0.0232346	0.983962	0.988931
hsa-miR-4521	26.0478	10.3819	27.7524	38.6506	9.28717	16.8775	1.0112	0.0160699	0.986418	0.990566
hsa-miR-149-5p	646.041	13.5533	513.042	53.7711	1108.81	24.0941	1.01199	0.0171883	0.990629	0.992291
hsa-miR-378a-5p	16.7321	35.3186	8.96285	21.9162	8.59063	30.1467	-1.00882	-0.0126654	0.9901	0.992291
hsa-miR-941	172.476	29.7104	187.896	25.8237	333.564	25.9564	-1.01221	-0.0175089	0.989095	0.992291
hsa-miR-4446-5p	5.9693	45.3667	11.1226	10.4484	12.6925	38.9928	-1.00719	-0.0103423	0.992782	0.993614
hsa-miR-3940-3p	7.77817	22.4998	9.50278	4.33227	31.7312	3.84109	1.00036	0.000522818	0.999628	0.999628
hsa-miR-1277-5p	0.180888	0.166912	0	9.6839	1.62526	6.6346	42.7259	5.41704	2.57278e-05	#N/A
hsa-miR-18b-3p	0.452219	0.0667649	0	2.63334	10.2159	4.48127	33.9076	5.08354	2.30074e-05	#N/A
hsa-miR-4803	0.180888	0.0333824	0.107986	3.22797	0.154786	4.77226	25.2515	4.6583	0.00153621	#N/A
hsa-miR-6508-5p	0	0.0667649	2.59167	17.0742	9.28717	7.56578	12.8913	3.68833	0.000967409	#N/A
hsa-miR-676-5p	1.35666	0.166912	0.431945	0.509679	15.0143	5.64523	10.8456	3.43904	0.00254418	#N/A
hsa-miR-10393-3p	0.994883	0.300442	0.107986	1.86882	5.34012	7.50758	10.4751	3.38889	0.00255588	#N/A
hsa-miR-4448	0.994883	0.901326	1.83576	11.128	1.85743	24.9671	10.2087	3.35172	0.000534759	#N/A
hsa-miR-4310	0.0904439	0.400589	0.215972	2.03871	0.619145	5.23784	9.94047	3.31331	0.00889299	#N/A
hsa-miR-3973	0.723551	0.333824	1.29583	4.16238	17.8004	0.931172	9.81505	3.295	0.00392671	#N/A
hsa-miR-587	0.271332	1.53559	0.215972	8.57959	0.0773931	10.8249	9.20438	3.20232	0.0111522	#N/A
hsa-miR-600	0.180888	0.26706	0.215972	5.52152	0.0773931	0.407388	8.47124	3.08257	0.0308017	#N/A
hsa-miR-491-3p	0	0.200295	0	0.339786	1.85743	0.0581983	7.80985	2.9653	0.0571018	#N/A
hsa-miR-194-3p	0.723551	0.200295	0.323958	3.31291	0.154786	5.93622	7.53273	2.91317	0.0216459	#N/A
hsa-miR-12116	1.08533	0.200295	0.215972	2.63334	8.43585	0.116397	7.37619	2.88288	0.0296639	#N/A
hsa-miR-2115-3p	2.44198	0.0667649	0.107986	2.97313	7.12017	8.78794	7.22841	2.85368	0.0221084	#N/A
hsa-miR-6726-3p	0.904439	0.400589	0.323958	1.1043	5.80448	4.83046	7.21329	2.85066	0.0165408	#N/A
hsa-miR-4693-5p	0.994883	0.500737	1.61979	4.84195	1.0835	15.1316	6.84211	2.77444	0.0113638	#N/A
hsa-miR-187-5p	1.53755	0.26706	0.647917	4.92689	3.4053	6.40181	6.33	2.6622	0.0174324	#N/A
hsa-miR-6515-3p	1.26621	0.100147	2.05174	3.39786	5.5723	11.8724	6.23973	2.64148	0.0154605	#N/A
hsa-miR-3117-3p	0.361775	0.13353	2.80764	3.22797	3.71487	12.1634	5.89837	2.56032	0.032937	#N/A
hsa-miR-7114-5p	1.35666	0.367207	0.431945	8.66454	3.79226	0.232793	5.8481	2.54797	0.0455876	#N/A
hsa-miR-7702	0.904439	0.100147	0.755903	2.29355	4.95316	2.21153	5.71796	2.5155	0.0349533	#N/A
hsa-miR-4724-3p	0.271332	1.80265	0	2.88818	1.78004	7.68217	5.56916	2.47746	0.0314115	#N/A
hsa-miR-1247-3p	0.723551	0.100147	0.107986	2.20861	0	3.02631	5.54948	2.47235	0.0861425	#N/A
hsa-miR-552-5p	1.53755	4.3731	0.431945	10.7882	0.309572	23.8613	5.43194	2.44147	0.0272239	#N/A
hsa-miR-6800-5p	0.633107	0.200295	3.1316	6.71077	0.309572	13.6184	5.24419	2.39072	0.0569164	#N/A
hsa-miR-512-3p	0.994883	2.30339	3.02361	2.88818	28.1711	2.21153	5.23505	2.3882	0.0211559	#N/A
hsa-miR-5692b	1.4471	0.13353	0.755903	1.61398	10.4481	0.0581983	5.17863	2.37257	0.0785309	#N/A
hsa-miR-3124-3p	2.08021	0.600884	0.755903	6.11614	5.6497	4.83046	5.0762	2.34375	0.0213766	#N/A
hsa-miR-6832-3p	0.542663	1.63574	0.107986	2.12366	0.386965	9.36992	4.97558	2.31486	0.0508412	#N/A
hsa-miR-1250-3p	0.904439	0.200295	0.647917	1.01936	3.09572	4.01568	4.91596	2.29747	0.0545645	#N/A
hsa-miR-3678-3p	7.86862	0.13353	0.323958	6.11614	32.5051	1.97874	4.86982	2.28387	0.0602076	#N/A
hsa-miR-4736	3.25598	2.63721	0	0.934411	27.4746	0.232793	4.8185	2.26859	0.0772485	#N/A
hsa-miR-6078	1.35666	1.10162	1.61979	1.61398	9.51935	8.20596	4.7732	2.25496	0.0235071	#N/A
hsa-miR-3146	0.723551	0.100147	0.323958	4.92689	0.154786	0.407388	4.7661	2.25281	0.103211	#N/A
hsa-miR-8080	1.17577	0.200295	3.77952	2.46345	13.9308	7.50758	4.69773	2.23196	0.0437477	#N/A
hsa-miR-6786-3p	0.904439	0.400589	0	0.509679	0.0773931	5.64523	4.65473	2.2187	0.12329	#N/A
hsa-miR-3923	1.35666	0.233677	0.107986	4.58711	3.25051	0.116397	4.63239	2.21176	0.106811	#N/A
hsa-miR-5683	1.53755	0.400589	1.94375	2.88818	7.27495	7.10019	4.63231	2.21173	0.0428981	#N/A
hsa-miR-12123	3.88909	0.367207	3.34757	1.78388	29.6416	2.50253	4.47184	2.16087	0.0580813	#N/A
hsa-miR-216b-3p	0.994883	0.0667649	0.755903	3.22797	1.00611	3.4919	4.4301	2.14734	0.0978554	#N/A
hsa-miR-4314	1.71843	2.60383	0.863889	11.2979	4.10183	8.32235	4.37261	2.1285	0.0166442	#N/A
hsa-miR-4682	1.62799	0.13353	0.863889	3.99248	1.70265	5.35424	4.33393	2.11568	0.0819542	#N/A
hsa-miR-190a-3p	0.904439	0.100147	0.107986	1.35914	3.4053	0.0581983	4.29543	2.1028	0.134514	#N/A
hsa-miR-4717-3p	1.35666	3.10457	0.107986	12.5721	3.94705	3.60829	4.26085	2.09114	0.0616897	#N/A
hsa-miR-215-3p	1.98977	0.367207	1.83576	3.82259	1.47047	12.2216	4.24081	2.08434	0.0560638	#N/A
hsa-miR-4293	0.994883	0.200295	4.53542	6.62582	3.79226	12.9782	4.13899	2.04928	0.0491675	#N/A
hsa-miR-5187-3p	1.35666	0.367207	0.755903	1.18925	1.23829	7.62397	4.11836	2.04207	0.0991725	#N/A
hsa-miR-7113-5p	4.34131	0.367207	2.80764	4.67206	8.35845	17.4013	4.08998	2.03209	0.0584426	#N/A
hsa-miR-6828-3p	0.813995	0.233677	0.431945	4.41722	1.47047	0.174595	4.08863	2.03162	0.134717	#N/A
hsa-miR-4772-5p	1.53755	0.834561	2.26771	12.4022	6.11405	0.407388	4.08452	2.03017	0.0724478	#N/A
hsa-miR-3177-5p	0.994883	0.233677	0.107986	2.88818	0	2.61892	4.06052	2.02166	0.163893	#N/A
hsa-miR-4705	1.89932	2.6706	0.107986	2.46345	10.9898	5.93622	4.03633	2.01304	0.0322872	#N/A
hsa-miR-3129-3p	0.904439	3.57192	0.431945	11.5527	0	8.20596	3.96196	1.98621	0.11658	#N/A
hsa-miR-5094	0.813995	3.10457	1.07986	9.59895	7.73931	2.79352	3.85308	1.94601	0.043483	#N/A
hsa-miR-331-5p	3.07509	0.233677	0.971875	1.18925	9.13239	5.87803	3.81325	1.93102	0.0942876	#N/A
hsa-miR-4304	0.633107	2.43692	0.215972	0.254839	6.57841	6.11082	3.81014	1.92984	0.0786201	#N/A
hsa-miR-186-3p	1.53755	0.13353	3.77952	6.20109	3.48269	10.1847	3.69913	1.88719	0.104142	#N/A
hsa-miR-4274	0.904439	6.2759	1.18785	10.9581	3.79226	16.7029	3.67881	1.87924	0.0646975	#N/A
hsa-miR-101-2-5p	0.0904439	0.0333824	1.61979	3.4828	0.386965	2.38613	3.66084	1.87218	0.187706	#N/A
hsa-miR-338-5p	7.14507	0.433972	1.61979	10.2785	1.85743	20.9514	3.60519	1.85007	0.103687	#N/A
hsa-miR-888-3p	1.89932	2.63721	1.07986	1.18925	12.0733	7.33298	3.60481	1.84992	0.0824582	#N/A
hsa-miR-3657	2.53243	3.30486	0.215972	2.46345	0.928717	18.5071	3.57581	1.83827	0.116128	#N/A
hsa-miR-3675-3p	0.904439	1.40206	0.863889	5.01184	0.154786	6.34361	3.5674	1.83487	0.132347	#N/A
hsa-miR-6815-3p	2.62287	2.77074	2.26771	5.77636	16.8717	4.94685	3.56608	1.83434	0.0408503	#N/A
hsa-miR-597-5p	1.26621	0.200295	0.215972	2.29355	0.232179	3.4337	3.56356	1.83332	0.181614	#N/A
hsa-miR-585-5p	4.70308	1.9028	1.94375	3.14302	14.1629	12.92	3.54799	1.827	0.0489236	#N/A
hsa-miR-4513	1.71843	0.567501	0.647917	1.35914	2.01222	6.8674	3.53677	1.82243	0.126996	#N/A
hsa-miR-4684-5p	2.44198	0.834561	1.07986	3.4828	0	11.6979	3.47482	1.79694	0.144028	#N/A
hsa-miR-802	1.71843	0.166912	1.29583	2.46345	0.0773931	8.43875	3.46937	1.79467	0.179531	#N/A
hsa-miR-6895-5p	1.35666	1.63574	3.56354	14.6108	4.56619	3.4337	3.46697	1.79368	0.0585127	#N/A
hsa-miR-6785-3p	0.813995	3.47177	1.40382	3.6527	15.7108	0.407388	3.41929	1.77369	0.116871	#N/A
hsa-miR-3201	0.994883	6.34266	2.26771	21.8312	3.56008	7.97316	3.41714	1.77279	0.0718564	#N/A
hsa-miR-1285-5p	0.813995	0.26706	2.59167	0.0849465	3.09572	9.19533	3.39602	1.76384	0.159968	#N/A
hsa-miR-6506-3p	1.89932	0.300442	0.431945	2.97313	0.232179	5.64523	3.3763	1.75544	0.159853	#N/A
hsa-miR-3688-5p	3.07509	0.433972	2.05174	5.18173	7.27495	5.76163	3.36251	1.74954	0.101062	#N/A
hsa-miR-216b-5p	1.80888	3.27148	2.05174	10.2785	1.54786	12.1052	3.31332	1.72828	0.0752381	#N/A
hsa-miR-4270	2.17065	5.54148	2.15972	16.2248	12.3829	4.65586	3.28882	1.71757	0.0807106	#N/A
hsa-miR-3681-5p	2.71332	0.433972	0.863889	2.54839	2.01222	8.43875	3.28567	1.71619	0.125796	#N/A
hsa-miR-500b-3p	3.16554	0.333824	0.755903	3.14302	1.54786	9.02073	3.25131	1.70102	0.135147	#N/A
hsa-miR-548m	1.4471	1.96956	3.77952	6.28604	10.835	5.58703	3.21079	1.68293	0.0470606	#N/A
hsa-miR-5196-3p	3.34642	0.300442	3.1316	6.62582	1.1609	13.7348	3.19895	1.6776	0.112626	#N/A
hsa-miR-3913-3p	0.452219	3.07118	0.107986	0.849465	2.01222	9.07893	3.18586	1.67168	0.140551	#N/A
hsa-miR-519a-2-5p	2.35154	0.100147	1.51181	0.339786	3.79226	8.38055	3.18024	1.66914	0.181401	#N/A
hsa-miR-3974	3.52731	2.16986	3.56354	4.757	3.71487	20.7186	3.17049	1.66471	0.0652197	#N/A
hsa-miR-3121-3p	1.4471	0.100147	4.31945	5.43657	4.87577	7.97316	3.15828	1.65914	0.145035	#N/A
hsa-miR-4457	0.0904439	0.166912	1.40382	0.254839	1.00611	3.84109	3.15437	1.65735	0.237238	#N/A
hsa-miR-376b-5p	1.08533	0.500737	2.69965	0.254839	5.41752	7.62397	3.13395	1.64798	0.141846	#N/A
hsa-miR-3163	2.53243	0.0667649	2.48368	2.12366	11.3768	2.26973	3.12273	1.64281	0.157651	#N/A
hsa-miR-4686	1.98977	0.500737	8.85487	5.94625	20.8187	8.38055	3.11891	1.64104	0.124887	#N/A
hsa-miR-4685-5p	1.71843	3.47177	3.23958	4.33227	9.36457	12.8036	3.11487	1.63917	0.0644632	#N/A
hsa-miR-3065-5p	3.34642	0.233677	2.91563	5.52152	1.54786	12.5708	3.04999	1.60881	0.161198	#N/A
hsa-miR-519a-3p	5.24574	0.934708	0.215972	1.18925	12.9246	5.41244	3.04725	1.60751	0.172036	#N/A
hsa-miR-4999-3p	2.62287	0.567501	1.72778	2.54839	3.86965	8.03136	3.01442	1.59188	0.117942	#N/A
hsa-miR-892a	0.452219	3.13795	0.647917	4.41722	2.78615	6.22722	3.00968	1.58961	0.109605	#N/A
hsa-miR-2276-5p	3.25598	3.20471	1.72778	8.57959	5.6497	10.7667	2.97791	1.5743	0.0861412	#N/A
hsa-miR-512-5p	4.06997	2.70398	1.83576	5.43657	18.497	1.74595	2.96701	1.56901	0.09868	#N/A
hsa-miR-5007-3p	2.53243	3.00442	6.15521	4.50216	11.2994	18.5653	2.96368	1.56739	0.0982258	#N/A
hsa-miR-5003-5p	2.8942	0.0333824	0	0.254839	2.01222	6.40181	2.95392	1.56263	0.271187	#N/A
hsa-miR-4773	0.813995	3.30486	2.69965	4.16238	15.7108	0.116397	2.90839	1.54022	0.192615	#N/A
hsa-miR-5189-3p	7.50684	0.734414	2.26771	5.26668	7.35234	17.6923	2.90095	1.53652	0.130036	#N/A
hsa-miR-6074	3.43687	3.20471	1.18785	8.91938	12.7699	1.22216	2.89274	1.53244	0.146097	#N/A
hsa-miR-6821-3p	2.80376	2.50368	6.15521	16.5646	1.00611	15.3643	2.87949	1.52581	0.113349	#N/A
hsa-miR-1303	0.723551	3.2381	0.647917	4.07743	2.39919	7.33298	2.86528	1.51868	0.120483	#N/A
hsa-miR-5694	2.44198	3.73883	2.69965	3.73764	0.154786	21.6498	2.86521	1.51864	0.154443	#N/A
hsa-miR-5009-3p	1.17577	0.0333824	0	1.01936	1.00611	1.39676	2.85752	1.51477	0.281378	#N/A
hsa-miR-4777-3p	1.89932	2.16986	4.64341	8.83443	2.39919	13.4438	2.85451	1.51324	0.0852285	#N/A
hsa-miR-3123	1.53755	2.73736	2.26771	5.18173	0.0773931	13.0946	2.79035	1.48045	0.213751	#N/A
hsa-miR-4676-5p	3.79864	0.534119	0.863889	5.26668	4.41141	4.59766	2.78353	1.47692	0.168741	#N/A
hsa-miR-6760-5p	2.62287	0.500737	3.77952	11.7226	2.01222	5.17965	2.76998	1.46988	0.172361	#N/A
hsa-miR-542-3p	1.89932	2.6706	2.05174	8.66454	0.464359	9.25353	2.75599	1.46257	0.164016	#N/A
hsa-miR-544b	3.97953	0.667649	2.48368	7.90002	4.64359	6.6346	2.74421	1.45639	0.176419	#N/A
hsa-miR-367-5p	1.17577	0.767796	0.107986	4.33227	1.0835	0.290991	2.69396	1.42973	0.286044	#N/A
hsa-miR-520e-5p	3.34642	0.433972	2.69965	4.67206	2.08961	10.4175	2.68752	1.42627	0.19373	#N/A
hsa-miR-202-5p	1.4471	5.07413	4.10347	16.9043	4.87577	7.04199	2.67966	1.42205	0.149436	#N/A
hsa-miR-5088-5p	1.89932	3.73883	1.72778	6.79572	12.9246	0.116397	2.66698	1.41521	0.218973	#N/A
hsa-miR-6762-5p	1.08533	4.84045	3.56354	0.509679	24.4562	0.465586	2.66545	1.41438	0.235327	#N/A
hsa-miR-524-3p	4.97441	0.26706	3.77952	0.594625	1.1609	22.2317	2.66514	1.41421	0.252835	#N/A
hsa-miR-3133	2.44198	1.7025	0.971875	6.62582	0.309572	6.6346	2.63351	1.39699	0.199999	#N/A
hsa-miR-3119	3.43687	0.500737	2.80764	4.58711	3.3279	9.48632	2.62693	1.39338	0.205227	#N/A
hsa-miR-4637	3.43687	2.70398	1.07986	4.92689	13.9308	0.174595	2.61661	1.3877	0.172463	#N/A
hsa-miR-4737	2.8942	0.333824	0.539931	3.99248	5.72709	0.116397	2.60592	1.38179	0.286521	#N/A
hsa-miR-376a-2-5p	2.71332	0.100147	0	1.52904	2.01222	3.72469	2.58565	1.37053	0.302621	#N/A
hsa-miR-567	1.53755	0.166912	1.83576	3.22797	3.4053	2.15334	2.56969	1.3616	0.243744	#N/A
hsa-miR-520f-3p	4.43175	0.534119	4.42743	1.69893	21.7475	0.640181	2.56782	1.36054	0.258274	#N/A
hsa-miR-181b-2-3p	3.43687	0.467354	2.80764	5.60647	5.34012	5.76163	2.54698	1.34879	0.20245	#N/A
hsa-miR-4687-3p	2.17065	0.367207	5.29132	3.22797	2.16701	14.3168	2.5422	1.34608	0.202973	#N/A
hsa-miR-4799-5p	0.0904439	2.03633	1.72778	1.44409	4.56619	3.95748	2.53509	1.34204	0.213118	#N/A
hsa-miR-1537-5p	0.361775	0.166912	1.94375	2.88818	0	3.3173	2.53003	1.33915	0.354358	#N/A
hsa-miR-6084	0.723551	3.20471	2.15972	6.20109	5.18534	4.71406	2.52803	1.33801	0.190262	#N/A
hsa-miR-4704-3p	1.08533	0.0667649	0	0.509679	0.232179	2.15334	2.52754	1.33774	0.350166	#N/A
hsa-miR-490-5p	2.17065	2.87089	0.647917	4.24732	6.42363	4.42307	2.51027	1.32784	0.169588	#N/A
hsa-miR-6510-3p	0.994883	2.77074	4.75139	0.509679	10.4481	10.1847	2.48199	1.3115	0.235088	#N/A
hsa-miR-10525-3p	3.16554	2.6706	6.2632	10.6183	14.7821	4.30667	2.47516	1.30752	0.151691	#N/A
hsa-miR-3131	4.88397	6.37605	0.539931	9.08927	2.16701	18.1579	2.47293	1.30622	0.209744	#N/A
hsa-miR-5002-3p	3.25598	0.968091	0.431945	8.23981	3.01833	0.290991	2.46465	1.30138	0.30629	#N/A
hsa-miR-936	2.35154	0.13353	2.69965	4.16238	5.6497	2.67712	2.44601	1.29043	0.287566	#N/A
hsa-miR-451b	8.68261	3.17133	2.3757	3.14302	23.2953	8.32235	2.44204	1.28808	0.180133	#N/A
hsa-miR-3156-5p	2.62287	3.30486	1.83576	1.35914	2.47658	15.1898	2.43769	1.28552	0.18794	#N/A
hsa-miR-320a-5p	3.97953	1.66912	2.05174	2.29355	7.35234	8.55515	2.3882	1.25593	0.238106	#N/A
hsa-miR-4697-3p	4.16042	4.84045	3.77952	16.9893	4.17923	9.42812	2.3747	1.24775	0.196409	#N/A
hsa-miR-3612	0.0904439	0.400589	1.61979	2.03871	2.01222	0.814776	2.37393	1.24727	0.342915	#N/A
hsa-miR-4671-3p	3.7082	0.166912	2.80764	3.14302	1.31568	11.1159	2.34838	1.23167	0.269766	#N/A
hsa-miR-3171	1.4471	3.63869	0.539931	1.01936	4.87577	7.56578	2.33608	1.22409	0.269747	#N/A
hsa-miR-4655-5p	4.88397	3.0378	4.96736	3.4828	11.1446	15.1898	2.33298	1.22218	0.198135	#N/A
hsa-miR-4512	1.17577	4.74031	3.02361	16.5646	0.928717	3.4919	2.32446	1.21689	0.224186	#N/A
hsa-miR-1911-3p	0.904439	4.84045	7.88299	3.22797	24.611	3.84109	2.32131	1.21494	0.235591	#N/A
hsa-miR-6798-3p	5.9693	3.30486	4.64341	2.20861	28.4033	1.57135	2.31031	1.20808	0.234746	#N/A
hsa-miR-6881-3p	7.05462	1.50221	1.29583	7.64518	6.50102	8.43875	2.3039	1.20408	0.20828	#N/A
hsa-miR-372-5p	0.723551	1.86942	0.215972	0.424732	0	6.16902	2.30171	1.20271	0.392452	#N/A
hsa-miR-3664-5p	2.8942	3.07118	8.31493	19.7076	2.94094	9.83551	2.28307	1.19098	0.199889	#N/A
hsa-miR-526b-5p	2.8942	2.73736	2.05174	5.69141	7.8941	4.42307	2.2821	1.19036	0.200203	#N/A
hsa-miR-4445-3p	0.994883	5.84193	1.51181	9.00432	0.541752	9.66091	2.26955	1.18241	0.246382	#N/A
hsa-miR-1282	1.08533	0.333824	2.59167	5.60647	1.0835	2.21153	2.26509	1.17957	0.318558	#N/A
hsa-miR-452-3p	0.633107	3.00442	3.99549	7.81507	9.20978	0.290991	2.25694	1.17437	0.309222	#N/A
hsa-miR-10523-5p	1.17577	0.0667649	4.21146	2.80323	5.5723	3.78289	2.25667	1.17419	0.34071	#N/A
hsa-miR-2909	1.26621	0.233677	0.971875	2.80323	2.32179	0.34919	2.25281	1.17173	0.37536	#N/A
hsa-miR-3943	4.43175	0.433972	2.15972	3.82259	11.7638	0.174595	2.24521	1.16685	0.34272	#N/A
hsa-miR-6880-3p	4.16042	0.400589	0.647917	6.20109	0.0773931	5.35424	2.23315	1.15908	0.384495	#N/A
hsa-miR-502-5p	4.52219	3.0378	2.80764	4.67206	4.41141	13.793	2.21624	1.14811	0.240492	#N/A
hsa-miR-4320	0.271332	2.80412	2.59167	3.56775	4.4888	4.71406	2.21504	1.14734	0.254487	#N/A
hsa-miR-3618	0.633107	0.100147	1.72778	3.90754	1.39308	0.0581983	2.19396	1.13354	0.419546	#N/A
hsa-miR-498-3p	7.4164	1.50221	2.3757	10.8731	1.47047	12.2216	2.18117	1.1251	0.255488	#N/A
hsa-miR-4263	1.89932	2.57045	4.96736	4.33227	5.95927	9.89371	2.17697	1.12232	0.188389	#N/A
hsa-miR-517a-3p	1.26621	0.467354	1.07986	1.35914	1.47047	2.79352	2.17309	1.11975	0.359624	#N/A
hsa-miR-6512-5p	2.71332	0.200295	0.863889	0.934411	4.10183	3.02631	2.1647	1.11416	0.355928	#N/A
hsa-miR-3145-5p	5.42663	1.03486	2.26771	8.06991	6.96538	3.60829	2.15611	1.10843	0.246925	#N/A
hsa-miR-12128	3.25598	6.17575	5.61528	7.05056	23.5275	1.97874	2.15442	1.1073	0.269753	#N/A
hsa-miR-4716-5p	3.43687	0.433972	0.107986	5.69141	1.00611	1.86234	2.14677	1.10217	0.376187	#N/A
hsa-miR-6501-3p	1.80888	0.0667649	1.29583	0.934411	1.70265	4.01568	2.14241	1.09923	0.392061	#N/A
hsa-miR-27b-5p	7.86862	0.500737	7.34306	16.1398	1.78004	15.4807	2.13228	1.09239	0.324011	#N/A
hsa-miR-4315	3.7082	1.93618	3.99549	5.43657	0.0773931	14.957	2.12548	1.08779	0.360913	#N/A
hsa-miR-302c-5p	2.62287	0.0333824	2.26771	0.934411	2.39919	7.04199	2.12497	1.08744	0.407187	#N/A
hsa-miR-548p	3.52731	3.10457	0.323958	4.24732	5.80448	5.00505	2.12219	1.08556	0.307239	#N/A
hsa-miR-6801-3p	3.97953	5.7084	0.971875	4.92689	6.96538	10.9995	2.10983	1.07713	0.279039	#N/A
hsa-miR-12126	3.61775	4.87384	7.0191	13.5914	8.90021	9.95191	2.10795	1.07584	0.253702	#N/A
hsa-miR-4742-5p	4.06997	0.13353	1.61979	0.764518	0.0773931	11.4069	2.10768	1.07566	0.425069	#N/A
hsa-miR-3175	2.44198	1.26853	4.10347	3.14302	7.66192	5.12145	2.09502	1.06696	0.259516	#N/A
hsa-miR-4766-3p	2.2611	2.53707	1.29583	2.97313	0.928717	8.90434	2.08525	1.06022	0.323816	#N/A
hsa-miR-556-5p	2.80376	2.06971	2.91563	7.1355	5.34012	3.4919	2.08014	1.05668	0.252185	#N/A
hsa-miR-511-3p	1.62799	2.73736	0.323958	1.95377	7.73931	0.232793	2.07557	1.05351	0.390186	#N/A
hsa-miR-2355-5p	3.34642	3.43839	5.50729	2.63334	12.0733	10.6503	2.07437	1.05267	0.282667	#N/A
hsa-miR-10b-3p	1.98977	2.4703	2.15972	4.16238	2.70876	6.8674	2.06258	1.04445	0.283831	#N/A
hsa-miR-5589-3p	2.44198	4.70692	4.53542	15.1205	2.2444	6.8674	2.06116	1.04346	0.256719	#N/A
hsa-miR-5699-5p	6.15018	0.333824	0.971875	3.6527	10.2933	1.33856	2.05309	1.0378	0.371331	#N/A
hsa-miR-4300	4.52219	0.300442	2.80764	5.86131	6.81059	2.85172	2.05307	1.03778	0.340458	#N/A
hsa-miR-4672	0.813995	2.4703	0.323958	1.18925	0.0773931	6.28541	2.05149	1.03667	0.398659	#N/A
hsa-miR-4728-3p	3.52731	0.367207	1.07986	5.18173	0.154786	4.83046	2.05014	1.03572	0.419891	#N/A
hsa-miR-196a-3p	7.14507	0.166912	1.83576	1.2742	6.57841	10.8249	2.04844	1.03453	0.347833	#N/A
hsa-miR-143-5p	4.16042	0.400589	0.431945	3.56775	6.50102	0.174595	2.04839	1.03449	0.429067	#N/A
hsa-miR-4764-5p	4.70308	2.63721	2.91563	5.01184	10.7576	5.00505	2.03843	1.02746	0.304305	#N/A
hsa-miR-11401	1.62799	3.27148	6.47917	4.757	14.6273	3.60829	2.02478	1.01777	0.250217	#N/A
hsa-miR-518a-5p	5.33619	2.77074	0.539931	4.41722	9.36457	3.84109	2.02337	1.01676	0.275672	#N/A
hsa-miR-141-5p	4.79353	4.00589	4.64341	6.88066	7.58452	12.2216	2.02183	1.01566	0.277423	#N/A
hsa-miR-3713	1.80888	3.07118	0.107986	1.61398	2.63137	6.05262	2.01743	1.01252	0.374497	#N/A
hsa-miR-4278	1.08533	4.97398	1.94375	8.74949	1.00611	6.6346	2.01433	1.0103	0.274647	#N/A
hsa-miR-6771-5p	3.07509	2.20324	1.94375	2.80323	3.4053	8.20596	2.01026	1.00738	0.287171	#N/A
hsa-miR-3649	4.06997	4.30633	0.323958	2.71829	14.3951	0.465586	2.00389	1.0028	0.360113	#N/A
hsa-miR-8063	0.813995	0.734414	3.34757	2.80323	2.2444	4.30667	1.98146	0.986562	0.398769	#N/A
hsa-miR-6796-3p	4.88397	2.63721	0.755903	7.3054	3.79226	5.41244	1.97794	0.984001	0.31667	#N/A
hsa-miR-5011-5p	4.25086	0.26706	2.91563	7.22045	2.2444	5.06325	1.97279	0.980236	0.37347	#N/A
hsa-miR-652-5p	6.42151	0.333824	5.29132	8.66454	4.87577	10.0101	1.96826	0.976918	0.370388	#N/A
hsa-miR-4689	4.61264	3.20471	2.48368	7.90002	10.835	1.62955	1.96621	0.975414	0.352569	#N/A
hsa-miR-8065	2.62287	2.6706	4.64341	2.88818	14.1629	2.44433	1.96439	0.974081	0.357508	#N/A
hsa-miR-3686	1.26621	5.00737	1.40382	9.00432	5.95927	0.34919	1.96319	0.9732	0.319237	#N/A
hsa-miR-6505-3p	4.61264	2.03633	5.18334	7.56023	0.696538	14.7242	1.94966	0.963222	0.302891	#N/A
hsa-miR-1269a	9.67749	1.23515	3.8875	9.76884	7.66192	11.1741	1.94678	0.961091	0.32545	#N/A
hsa-miR-6798-5p	0.180888	0.367207	0.863889	1.95377	0.309572	0.465586	1.94141	0.957106	0.470632	#N/A
hsa-miR-549a-3p	2.35154	0.166912	3.02361	5.94625	0.309572	4.42307	1.94063	0.956522	0.453413	#N/A
hsa-miR-6890-5p	1.80888	6.10899	0.539931	1.18925	15.0917	0.290991	1.93862	0.955026	0.422254	#N/A
hsa-miR-4504	1.35666	0.200295	2.48368	0.679572	2.2444	4.65586	1.92003	0.941125	0.436792	#N/A
hsa-miR-3685	2.53243	2.70398	3.99549	4.24732	5.72709	6.98379	1.91108	0.934391	0.345271	#N/A
hsa-miR-6838-3p	2.08021	4.3731	7.34306	3.6527	12.7699	9.77731	1.90518	0.929929	0.32082	#N/A
hsa-miR-3658	0.813995	0.200295	3.77952	2.97313	5.10794	0.931172	1.9051	0.929865	0.449047	#N/A
hsa-miR-155-3p	1.26621	0.26706	1.18785	0.424732	4.64359	0.0581983	1.88866	0.917366	0.506416	#N/A
hsa-miR-10526-3p	4.43175	0.166912	4.53542	2.54839	11.8411	2.73532	1.88395	0.913762	0.412865	#N/A
hsa-miR-1178-5p	2.53243	2.37015	2.91563	8.57959	0.541752	5.58703	1.87821	0.909361	0.408891	#N/A
hsa-miR-4257	3.97953	0.901326	1.18785	4.24732	1.31568	5.70343	1.87433	0.906372	0.42271	#N/A
hsa-miR-3166	2.2611	0.13353	0.539931	0.254839	1.62526	3.55009	1.87375	0.905925	0.493519	#N/A
hsa-miR-637	2.53243	0.233677	0.215972	2.3785	2.78615	0.34919	1.84911	0.886834	0.516541	#N/A
hsa-miR-4323	5.51708	2.50368	5.72327	0.339786	24.6884	0.34919	1.84518	0.883758	0.463533	#N/A
hsa-miR-6840-3p	2.71332	0.200295	4.10347	7.3054	4.56619	0.989371	1.84479	0.883455	0.475334	#N/A
hsa-miR-548an	3.88909	2.87089	0.647917	2.80323	1.39308	9.54452	1.84452	0.883242	0.366971	#N/A
hsa-miR-1973	1.53755	0.600884	0.431945	2.29355	1.47047	0.931172	1.83122	0.872802	0.493727	#N/A
hsa-miR-5700	1.53755	4.30633	0.863889	2.03871	10.1385	0.290991	1.83099	0.872624	0.403025	#N/A
hsa-miR-96-3p	1.62799	0.701031	8.09896	2.12366	9.82892	6.6928	1.80391	0.851131	0.433057	#N/A
hsa-miR-1295a	1.80888	1.93618	2.59167	2.46345	5.34012	3.4337	1.80288	0.850302	0.394923	#N/A
hsa-miR-10394-5p	0.723551	4.47325	0.215972	3.82259	5.80448	0.34919	1.7999	0.847915	0.452596	#N/A
hsa-miR-3074-3p	3.16554	0.13353	3.1316	5.43657	1.23829	4.77226	1.79681	0.845439	0.499936	#N/A
hsa-miR-4267	0.994883	2.73736	1.18785	1.52904	0.464359	6.92559	1.78861	0.838841	0.448169	#N/A
hsa-miR-5590-5p	12.3004	0.166912	1.29583	3.39786	18.8065	2.26973	1.77856	0.830708	0.498451	#N/A
hsa-miR-6809-5p	7.14507	2.03633	4.21146	11.128	1.62526	10.8831	1.77243	0.825726	0.356169	#N/A
hsa-miR-1972	1.08533	3.53854	1.72778	3.82259	7.35234	0.174595	1.76193	0.817154	0.436301	#N/A
hsa-miR-3140-3p	1.26621	5.00737	8.20695	7.1355	1.85743	16.4119	1.7561	0.812374	0.429908	#N/A
hsa-miR-4633-3p	1.80888	0.400589	0.431945	4.50216	0	0.174595	1.75605	0.812334	0.576672	#N/A
hsa-miR-1206	0.542663	5.04075	4.53542	3.39786	0.773931	13.4438	1.73543	0.795292	0.451604	#N/A
hsa-miR-2467-5p	1.62799	7.01031	3.67153	5.01184	3.63748	12.8036	1.72461	0.786274	0.408123	#N/A
hsa-miR-4675	4.52219	2.60383	5.39931	5.86131	14.1629	1.51316	1.72281	0.784763	0.452747	#N/A
hsa-miR-1301-5p	1.17577	3.43839	0.431945	2.20861	0.0773931	6.51821	1.71921	0.781743	0.520877	#N/A
hsa-miR-3622b-5p	4.61264	3.47177	0.215972	4.24732	1.0835	8.96253	1.71165	0.775384	0.493722	#N/A
hsa-miR-4753-3p	1.35666	4.00589	3.45556	4.757	5.03055	5.70343	1.70915	0.773277	0.349119	#N/A
hsa-miR-5092	1.4471	0.13353	2.48368	6.79572	0.154786	0	1.70836	0.772614	0.617938	#N/A
hsa-miR-4714-3p	4.16042	8.31223	2.48368	3.73764	14.3951	7.74037	1.70701	0.771475	0.423636	#N/A
hsa-miR-370-5p	5.69796	0.567501	9.17882	3.90754	9.20978	12.9782	1.70112	0.766485	0.476806	#N/A
hsa-miR-520f-5p	1.17577	2.30339	1.40382	1.86882	6.42363	0.116397	1.69864	0.764382	0.501984	#N/A
hsa-miR-4735-5p	0.904439	1.83603	3.1316	7.3054	0.0773931	2.61892	1.69815	0.763964	0.537717	#N/A
hsa-miR-1323	7.77817	1.7025	4.31945	11.8925	6.19145	5.17965	1.69798	0.763818	0.39711	#N/A
hsa-miR-4317	1.71843	5.34119	5.93924	4.92689	5.49491	11.6397	1.6947	0.761028	0.435549	#N/A
hsa-miR-4264	4.88397	5.20766	3.99549	11.2129	6.26884	6.40181	1.66138	0.732382	0.438605	#N/A
hsa-miR-3191-3p	2.80376	0.701031	2.05174	1.86882	3.71487	3.3173	1.66082	0.731897	0.524955	#N/A
hsa-miR-5197-3p	1.08533	2.13648	6.04723	3.73764	5.88188	5.52884	1.65792	0.729378	0.444921	#N/A
hsa-miR-675-3p	16.6417	2.40354	0.539931	13.1667	12.6151	6.6928	1.65774	0.729219	0.500073	#N/A
hsa-miR-671-3p	6.42151	6.57634	3.34757	6.96561	8.90021	11.6397	1.65763	0.729126	0.399744	#N/A
hsa-miR-3691-5p	1.98977	8.94649	4.75139	6.71077	16.8717	2.56072	1.65171	0.723959	0.460025	#N/A
hsa-miR-4746-3p	0.994883	0.500737	0.755903	0.594625	2.94094	0.174595	1.64543	0.718469	0.589416	#N/A
hsa-miR-205-3p	0.452219	2.50368	0.215972	2.03871	0.232179	3.14271	1.64481	0.717917	0.57115	#N/A
hsa-miR-374c-3p	0.361775	8.7462	2.26771	2.80323	9.13239	6.98379	1.64321	0.716512	0.484667	#N/A
hsa-miR-4484	1.71843	0.534119	4.96736	2.71829	6.57841	2.32793	1.63483	0.709141	0.513063	#N/A
hsa-miR-1296-5p	10.6724	0.333824	7.66702	4.41722	16.6395	9.36992	1.63424	0.708616	0.475095	#N/A
hsa-miR-8087	2.71332	4.33972	1.72778	2.03871	8.66803	3.78289	1.6194	0.695456	0.454011	#N/A
hsa-miR-1224-3p	3.25598	3.10457	3.77952	2.97313	1.1609	12.2216	1.61815	0.694344	0.481189	#N/A
hsa-miR-4794	0.904439	0.367207	2.3757	0.339786	3.25051	2.15334	1.61346	0.690158	0.576353	#N/A
hsa-miR-6830-3p	1.08533	9.74767	3.34757	12.0624	1.78004	9.25353	1.61318	0.689907	0.475383	#N/A
hsa-miR-382-3p	16.4608	0.233677	3.1316	19.7076	5.41752	6.8092	1.61173	0.688612	0.545023	#N/A
hsa-miR-3692-3p	2.80376	0.467354	0.647917	3.4828	2.70876	0.116397	1.60675	0.684142	0.602097	#N/A
hsa-miR-4534	3.07509	3.57192	1.40382	7.1355	3.71487	2.44433	1.60484	0.68243	0.471357	#N/A
hsa-miR-1914-5p	2.44198	3.0378	5.83125	6.28604	7.58452	4.01568	1.60088	0.678862	0.406805	#N/A
hsa-miR-4744	1.17577	5.00737	0.971875	2.46345	6.81059	2.50253	1.59754	0.67585	0.446987	#N/A
hsa-miR-3908	0.0904439	5.74178	0.323958	4.67206	2.39919	2.96811	1.59551	0.67402	0.553762	#N/A
hsa-miR-3680-5p	3.07509	3.53854	0.431945	6.54088	2.78615	2.15334	1.59357	0.672261	0.51377	#N/A
hsa-miR-626	1.53755	5.67501	3.23958	2.3785	12.9246	1.51316	1.59314	0.671873	0.491132	#N/A
hsa-miR-4515	2.80376	2.60383	1.29583	4.58711	4.25662	2.15334	1.5814	0.661199	0.529686	#N/A
hsa-miR-1207-3p	2.71332	6.17575	0.431945	3.22797	2.16701	9.42812	1.56977	0.650556	0.503976	#N/A
hsa-miR-6767-3p	4.16042	8.1787	4.21146	12.9968	11.9959	1.16397	1.56882	0.649683	0.50387	#N/A
hsa-miR-4432	1.62799	0.567501	2.80764	3.73764	2.55397	1.33856	1.56665	0.647687	0.572021	#N/A
hsa-miR-3141	1.80888	2.13648	7.23507	10.7882	0.386965	6.16902	1.55495	0.636868	0.545783	#N/A
hsa-miR-4253	0.813995	7.77811	1.94375	6.54088	9.67414	0.290991	1.55001	0.632274	0.568199	#N/A
hsa-miR-3188	3.07509	0.567501	1.83576	2.20861	5.95927	0.290991	1.5494	0.63171	0.615667	#N/A
hsa-miR-3675-5p	1.26621	6.34266	2.26771	4.50216	4.64359	6.46001	1.53889	0.621887	0.476272	#N/A
hsa-miR-4667-5p	2.17065	5.10751	4.21146	4.41722	6.19145	7.27478	1.52883	0.612427	0.471645	#N/A
hsa-miR-6083	0.361775	0.200295	2.05174	0.849465	0	3.08451	1.52653	0.610257	0.670362	#N/A
hsa-miR-8084	2.53243	3.33824	1.51181	3.39786	5.34012	3.14271	1.52569	0.609462	0.49521	#N/A
hsa-miR-550b-3p	3.61775	2.27001	3.23958	5.26668	2.55397	5.76163	1.52417	0.608025	0.535891	#N/A
hsa-miR-4788	3.25598	5.87531	4.64341	1.2742	13.389	6.40181	1.52304	0.606958	0.536467	#N/A
hsa-miR-1909-3p	0.271332	5.34119	0.107986	2.88818	1.47047	4.53947	1.5221	0.606061	0.604349	#N/A
hsa-miR-6753-5p	1.71843	7.51105	2.3757	1.2742	10.5255	6.05262	1.52034	0.604398	0.551415	#N/A
hsa-miR-3184-3p	2.53243	0.200295	1.83576	2.29355	1.62526	2.85172	1.51952	0.603619	0.61351	#N/A
hsa-miR-412-3p	6.51196	0.233677	2.26771	3.05807	9.82892	0.756578	1.51657	0.600813	0.60738	#N/A
hsa-miR-6885-3p	9.40616	0.801179	4.42743	9.34411	4.17923	8.49695	1.51339	0.597788	0.585654	#N/A
hsa-miR-6762-3p	3.07509	0.300442	1.51181	7.05056	0	0.34919	1.51118	0.595679	0.683077	#N/A
hsa-miR-190b-3p	1.71843	0.26706	1.72778	1.95377	3.4053	0.174595	1.50311	0.587949	0.65118	#N/A
hsa-miR-6806-5p	2.8942	6.74325	0.755903	15.4603	0.0773931	0.174595	1.502	0.586887	0.653626	#N/A
hsa-miR-11181-5p	2.53243	1.56897	4.10347	3.05807	3.4053	5.29604	1.4974	0.582455	0.560156	#N/A
hsa-miR-4690-5p	2.44198	5.60825	1.83576	1.95377	9.36457	3.60829	1.48365	0.569155	0.52716	#N/A
hsa-miR-545-3p	2.44198	3.53854	0.647917	3.90754	0.309572	5.70343	1.47924	0.564852	0.619749	#N/A
hsa-miR-6883-3p	1.89932	3.87236	3.77952	3.14302	3.56008	7.44938	1.47821	0.563849	0.53727	#N/A
hsa-miR-5585-3p	4.34131	3.53854	2.59167	3.82259	3.25051	8.32235	1.47365	0.55939	0.519032	#N/A
hsa-miR-583	1.35666	0.233677	5.50729	2.3785	2.63137	5.29604	1.47364	0.559387	0.645519	#N/A
hsa-miR-4695-5p	0.271332	2.6706	2.59167	3.90754	1.93483	2.44433	1.47329	0.559037	0.602725	#N/A
hsa-miR-6715a-3p	4.97441	2.40354	6.15521	4.67206	11.222	3.84109	1.4729	0.558656	0.567115	#N/A
hsa-miR-510-5p	1.53755	1.56897	1.40382	3.14302	1.47047	2.21153	1.47207	0.557842	0.622577	#N/A
hsa-miR-602	1.80888	1.80265	0.863889	2.54839	3.86965	0.290991	1.46978	0.555598	0.646698	#N/A
hsa-miR-371a-5p	1.35666	2.53707	1.72778	4.84195	0.0773931	3.3755	1.46208	0.548024	0.63589	#N/A
hsa-miR-4291	1.17577	3.77222	1.18785	5.26668	1.00611	2.96811	1.46104	0.546997	0.621129	#N/A
hsa-miR-1266-3p	2.17065	8.84635	4.96736	5.26668	8.51324	9.83551	1.45793	0.543925	0.568455	#N/A
hsa-miR-4798-3p	0.0904439	0.300442	0.215972	0.764518	0.232179	0	1.45716	0.54316	0.70819	#N/A
hsa-miR-1184	4.52219	3.37163	1.72778	5.26668	3.25051	5.64523	1.45556	0.541572	0.593401	#N/A
hsa-miR-3064-5p	5.42663	7.04369	3.8875	11.4678	7.04277	5.81983	1.45153	0.537573	0.570872	#N/A
hsa-miR-8088	1.89932	0.667649	6.2632	5.18173	4.64359	2.79352	1.44984	0.535894	0.61468	#N/A
hsa-miR-8055	4.88397	1.36868	1.83576	10.1086	1.31568	0.290991	1.44495	0.531021	0.667534	#N/A
hsa-miR-767-5p	3.43687	3.10457	7.45105	4.92689	2.32179	12.6872	1.43719	0.523253	0.617488	#N/A
hsa-miR-12124	2.71332	5.80854	3.23958	8.74949	2.16701	5.93622	1.41088	0.496596	0.5909	#N/A
hsa-miR-223-5p	4.25086	3.0378	4.42743	2.80323	5.6497	7.74037	1.40994	0.49563	0.55984	#N/A
hsa-miR-299-5p	7.77817	0.13353	10.1507	4.757	10.6029	10.0101	1.40914	0.494819	0.654874	#N/A
hsa-miR-670-3p	2.98465	3.8056	0.539931	3.73764	0.773931	5.93622	1.40809	0.493739	0.626573	#N/A
hsa-miR-3158-5p	1.17577	0.233677	3.67153	3.73764	1.39308	1.86234	1.4023	0.48779	0.690299	#N/A
hsa-miR-4520-5p	1.98977	1.43544	3.45556	0.934411	0.154786	8.43875	1.39231	0.477483	0.691344	#N/A
hsa-miR-3682-5p	4.25086	6.47619	4.31945	10.3635	7.04277	3.95748	1.39144	0.476574	0.611617	#N/A
hsa-miR-1272	1.89932	8.21208	6.04723	6.11614	5.10794	11.2323	1.37993	0.464597	0.604151	#N/A
hsa-miR-3174	0.994883	9.11341	0.971875	3.39786	5.26273	6.8674	1.37893	0.463545	0.655727	#N/A
hsa-miR-3920	2.2611	5.00737	2.26771	4.92689	5.26273	3.60829	1.3771	0.461634	0.598726	#N/A
hsa-miR-4528	0	3.13795	2.48368	0.0849465	0	7.68217	1.37654	0.461043	0.744972	#N/A
hsa-miR-618	4.88397	1.60236	6.80313	3.6527	4.79837	9.54452	1.37622	0.460712	0.654887	#N/A
hsa-miR-147b-5p	7.86862	2.10309	4.42743	4.24732	4.87577	10.4175	1.37352	0.457879	0.586138	#N/A
hsa-miR-4523	1.26621	6.50958	0.971875	2.54839	2.08961	7.56578	1.37119	0.455431	0.65512	#N/A
hsa-miR-3924	3.34642	4.07266	1.29583	5.52152	1.54786	5.06325	1.36823	0.452314	0.658595	#N/A
hsa-miR-6828-5p	2.80376	0.200295	0.323958	4.24732	0.0773931	0.232793	1.36442	0.448289	0.755054	#N/A
hsa-miR-4517	6.05974	0.400589	6.80313	10.3635	7.66192	0.0581983	1.36435	0.448209	0.725071	#N/A
hsa-miR-621	1.80888	3.43839	0.215972	4.33227	0.386965	2.85172	1.35833	0.441836	0.685679	#N/A
hsa-miR-1296-3p	6.87373	5.80854	5.07535	1.01936	16.7169	6.40181	1.35783	0.441305	0.653772	#N/A
hsa-miR-1912-5p	3.7082	2.60383	1.07986	5.18173	4.79837	0.116397	1.35543	0.438749	0.698852	#N/A
hsa-miR-651-3p	5.24574	6.2759	6.58716	3.90754	2.94094	17.6341	1.35482	0.438101	0.66134	#N/A
hsa-miR-6871-3p	18.9028	0.0667649	0.215972	5.18173	10.6029	10.1265	1.3508	0.433817	0.735183	#N/A
hsa-miR-371b-3p	11.6673	0.834561	3.45556	9.514	2.47658	9.48632	1.35046	0.433455	0.700434	#N/A
hsa-miR-570-3p	8.77306	0.534119	4.21146	4.92689	7.97149	5.23784	1.34943	0.432351	0.667808	#N/A
hsa-miR-6826-5p	0.180888	0.300442	4.10347	3.39786	2.63137	0.116397	1.34731	0.430085	0.756502	#N/A
hsa-miR-1279	1.35666	0.13353	2.15972	3.05807	1.70265	0.116397	1.34622	0.428914	0.756509	#N/A
hsa-miR-3671	5.06486	0.233677	5.61528	2.97313	6.03666	5.52884	1.34288	0.425334	0.704043	#N/A
hsa-miR-3059-3p	0.542663	2.13648	4.64341	3.99248	5.26273	0.581983	1.34257	0.425	0.694623	#N/A
hsa-miR-4468	3.07509	0.166912	1.61979	0.594625	0.696538	5.12145	1.33589	0.417806	0.742108	#N/A
hsa-miR-649	9.40616	1.00147	8.63889	9.25916	4.87577	11.1159	1.33434	0.416127	0.676939	#N/A
hsa-miR-3682-3p	5.33619	0.901326	3.34757	4.757	5.18534	2.67712	1.33294	0.414616	0.679965	#N/A
hsa-miR-3143	10.2202	0.467354	7.55903	4.58711	17.6456	2.03694	1.33267	0.414319	0.714391	#N/A
hsa-miR-129-5p	6.78329	3.67207	8.53091	9.85379	4.25662	10.8831	1.33253	0.414168	0.639089	#N/A
hsa-miR-7112-3p	2.8942	0.26706	1.83576	0.509679	3.17312	2.85172	1.32897	0.410309	0.731177	#N/A
hsa-miR-4269	0.904439	1.96956	2.3757	0.594625	0.0773931	6.28541	1.32677	0.407915	0.748932	#N/A
hsa-miR-188-5p	10.6724	0.767796	11.8785	12.8269	4.02444	13.8512	1.32162	0.402304	0.684792	#N/A
hsa-miR-2278	2.98465	6.24252	2.59167	4.33227	4.25662	7.33298	1.31352	0.393435	0.654195	#N/A
hsa-miR-1238-3p	3.61775	2.70398	2.80764	4.33227	0.309572	7.33298	1.31337	0.393273	0.718043	#N/A
hsa-miR-3130-3p	2.17065	2.43692	2.26771	3.22797	1.70265	4.07388	1.3105	0.390119	0.68719	#N/A
hsa-miR-6735-3p	4.06997	8.94649	2.91563	10.7882	7.19756	3.20091	1.30704	0.386309	0.673879	#N/A
hsa-miR-548v	0.452219	0.300442	2.05174	2.71829	0.232179	0.640181	1.29958	0.378043	0.771478	#N/A
hsa-miR-6736-3p	3.07509	1.63574	2.91563	3.99248	0.464359	5.35424	1.29644	0.374556	0.735055	#N/A
hsa-miR-12132	2.62287	3.50516	1.18785	2.88818	5.10794	1.80415	1.29597	0.374031	0.690339	#N/A
hsa-miR-7850-5p	4.52219	0.667649	6.69514	7.39034	4.33401	3.4919	1.29253	0.370192	0.73238	#N/A
hsa-miR-711	0.904439	0.667649	0.647917	2.46345	0.154786	0.290991	1.28532	0.362129	0.781201	#N/A
hsa-miR-4797-5p	1.98977	0.166912	6.91111	7.56023	0.309572	3.72469	1.28401	0.36066	0.783505	#N/A
hsa-miR-1245b-3p	3.61775	0.233677	1.40382	0.934411	2.55397	3.14271	1.28144	0.357765	0.761836	#N/A
hsa-miR-1252-3p	2.80376	0.767796	3.45556	4.92689	2.39919	1.51316	1.27677	0.352503	0.764282	#N/A
hsa-miR-6128	3.43687	7.44428	6.58716	4.50216	1.1609	16.6447	1.27665	0.352363	0.723814	#N/A
hsa-miR-6758-3p	0.361775	3.2381	1.40382	4.24732	2.08961	0.174595	1.27332	0.348599	0.76291	#N/A
hsa-miR-5702	1.26621	1.76927	1.18785	1.69893	0.154786	3.55009	1.27267	0.347854	0.770929	#N/A
hsa-miR-3683	1.35666	0.433972	1.51181	1.44409	1.47047	0.989371	1.27146	0.346489	0.783546	#N/A
hsa-miR-5197-5p	1.62799	3.07118	0.215972	1.61398	0.541752	4.19028	1.26748	0.341962	0.761194	#N/A
hsa-miR-12117	2.71332	11.784	1.61979	6.88066	10.6029	3.20091	1.26626	0.340572	0.720388	#N/A
hsa-miR-3128	3.34642	3.83898	3.02361	2.54839	2.78615	7.56578	1.26578	0.340031	0.734265	#N/A
hsa-miR-1292-3p	1.80888	10.5489	2.26771	3.6527	9.59674	5.52884	1.26536	0.339546	0.732528	#N/A
hsa-miR-4698	3.43687	3.2381	3.8875	5.43657	1.70265	6.05262	1.25654	0.329457	0.732984	#N/A
hsa-miR-1278	3.61775	0.333824	2.15972	4.757	1.62526	1.22216	1.25452	0.32713	0.781525	#N/A
hsa-miR-5704	0.271332	0.233677	1.94375	0.254839	2.63137	0.116397	1.24132	0.311874	0.820508	#N/A
hsa-miR-3144-3p	0	3.07118	2.15972	3.22797	0.154786	3.14271	1.23695	0.306783	0.805029	#N/A
hsa-miR-586	1.80888	4.84045	1.40382	3.39786	0.309572	6.34361	1.2356	0.305216	0.786034	#N/A
hsa-miR-1276	8.95394	3.93913	7.0191	5.52152	12.6925	6.11082	1.23147	0.300385	0.750975	#N/A
hsa-miR-4740-5p	2.53243	11.6171	1.51181	3.39786	4.56619	11.4069	1.22466	0.292382	0.767668	#N/A
hsa-miR-6809-3p	2.98465	4.60678	3.02361	6.11614	2.39919	4.77226	1.22336	0.290855	0.734261	#N/A
hsa-miR-876-3p	2.53243	11.083	2.59167	5.43657	9.98371	4.71406	1.22268	0.290048	0.760879	#N/A
hsa-miR-4711-3p	2.17065	8.87973	7.66702	12.2323	0.696538	10.0101	1.22237	0.289675	0.776469	#N/A
hsa-miR-196a-1-3p	10.3106	0.100147	4.42743	1.78388	16.0978	0.232793	1.22124	0.288347	0.826383	#N/A
hsa-miR-6870-3p	2.44198	5.1409	0.647917	4.33227	4.79837	1.04757	1.20938	0.274265	0.796307	#N/A
hsa-miR-6732-5p	1.62799	3.17133	3.67153	2.12366	7.50713	0.640181	1.20611	0.270363	0.788279	#N/A
hsa-miR-4514	4.34131	0.367207	5.29132	4.33227	5.10794	2.50253	1.20563	0.269785	0.808709	#N/A
hsa-miR-591	2.8942	4.03928	4.53542	5.26668	5.5723	3.20091	1.20501	0.269044	0.755209	#N/A
hsa-miR-885-5p	1.98977	0.701031	1.18785	1.95377	0.154786	2.50253	1.20483	0.268834	0.833566	#N/A
hsa-miR-6509-5p	6.69285	3.40501	5.83125	6.20109	9.36457	3.4337	1.20101	0.264246	0.790339	#N/A
hsa-miR-604	4.88397	5.5081	6.2632	8.49465	1.47047	10.0101	1.20045	0.263581	0.771768	#N/A
hsa-miR-3169	2.62287	5.07413	2.59167	3.56775	3.48269	5.64523	1.19644	0.258752	0.761226	#N/A
hsa-miR-3117-5p	0.271332	4.1728	0	1.1043	4.25662	0	1.18764	0.248093	0.856069	#N/A
hsa-miR-19a-5p	2.35154	0.534119	1.18785	2.20861	2.63137	0	1.1868	0.247073	0.855554	#N/A
hsa-miR-4756-3p	1.62799	0.26706	2.59167	2.29355	0	2.96811	1.18253	0.241879	0.860867	#N/A
hsa-miR-7152-5p	1.17577	2.57045	7.88299	8.49465	1.62526	3.55009	1.17974	0.238464	0.819458	#N/A
hsa-miR-3922-5p	4.16042	10.1483	4.53542	14.271	0.773931	7.21659	1.17513	0.232821	0.815331	#N/A
hsa-miR-4758-3p	3.7082	0.534119	4.85938	2.3785	4.10183	4.01568	1.17325	0.230507	0.83227	#N/A
hsa-miR-3927-5p	0.452219	10.4821	3.34757	10.4484	3.4053	2.90991	1.16228	0.216956	0.833699	#N/A
hsa-miR-5680	6.24063	0.400589	6.04723	3.73764	4.02444	6.8092	1.15861	0.212399	0.852016	#N/A
hsa-miR-3192-5p	3.88909	2.87089	1.51181	2.29355	5.03055	2.38613	1.1586	0.212383	0.837793	#N/A
hsa-miR-135a-2-3p	4.88397	6.04222	2.80764	3.39786	9.51935	3.20091	1.15839	0.212121	0.819205	#N/A
hsa-miR-6864-5p	7.50684	6.77663	2.15972	6.79572	3.3279	8.96253	1.15337	0.205853	0.831556	#N/A
hsa-miR-4277	1.98977	0.166912	1.72778	3.14302	1.00611	0.290991	1.15173	0.203801	0.878189	#N/A
hsa-miR-4743-5p	1.35666	2.87089	3.23958	2.88818	1.78004	3.89928	1.14691	0.197748	0.845124	#N/A
hsa-miR-4731-3p	2.62287	6.81002	3.8875	3.56775	6.34623	5.70343	1.14689	0.197729	0.838655	#N/A
hsa-miR-4489	3.88909	7.57781	7.775	4.757	12.2281	5.17965	1.14672	0.197512	0.823212	#N/A
hsa-miR-622	1.89932	1.135	4.42743	1.2742	4.64359	2.44433	1.14373	0.193744	0.865381	#N/A
hsa-miR-12122	1.53755	2.87089	1.18785	3.31291	2.86354	0.407388	1.14341	0.193347	0.857939	#N/A
hsa-miR-4311	6.33107	5.40795	6.37118	2.46345	9.51935	8.61334	1.14285	0.192634	0.834505	#N/A
hsa-miR-1228-3p	8.32084	0.166912	4.21146	3.31291	4.64359	6.46001	1.14098	0.190273	0.869036	#N/A
hsa-miR-653-3p	3.25598	5.30781	5.39931	6.79572	2.78615	6.40181	1.13979	0.188763	0.83617	#N/A
hsa-miR-4661-5p	2.08021	11.5169	4.64341	4.24732	12.2281	4.48127	1.13715	0.185419	0.82595	#N/A
hsa-miR-2116-3p	4.25086	2.83751	7.45105	7.3054	5.03055	3.89928	1.13384	0.181218	0.855148	#N/A
hsa-miR-4436a	2.08021	0.934708	5.29132	2.03871	0.0773931	7.21659	1.13128	0.17796	0.887707	#N/A
hsa-miR-518a-3p	8.0495	5.5081	4.42743	3.6527	15.7882	0.931172	1.13038	0.176804	0.861202	#N/A
hsa-miR-4633-5p	4.79353	4.57339	10.9066	6.11614	4.02444	12.5126	1.12861	0.174553	0.858333	#N/A
hsa-miR-224-3p	2.2611	8.34561	3.02361	8.06991	0.0773931	7.21659	1.12175	0.165748	0.882116	#N/A
hsa-miR-519d-5p	3.97953	2.43692	3.56354	0.254839	7.50713	3.3755	1.11821	0.161191	0.87515	#N/A
hsa-miR-3976	0.723551	0.333824	4.21146	1.95377	1.00611	2.79352	1.11709	0.15975	0.898489	#N/A
hsa-miR-10401-5p	4.16042	4.80707	2.69965	4.07743	4.87577	4.88866	1.11543	0.157601	0.865905	#N/A
hsa-miR-5188	3.61775	2.70398	1.94375	1.44409	7.66192	0.116397	1.11098	0.15183	0.897251	#N/A
hsa-miR-2682-5p	6.69285	1.9028	4.21146	7.3054	1.62526	5.17965	1.10953	0.149944	0.883824	#N/A
hsa-miR-513b-3p	3.16554	5.34119	3.77952	2.29355	5.34012	6.11082	1.10853	0.14865	0.871818	#N/A
hsa-miR-450b-5p	8.41128	0.433972	2.59167	1.18925	5.88188	5.52884	1.10759	0.147422	0.895451	#N/A
hsa-miR-4481	4.61264	0.26706	1.51181	1.78388	4.95316	0.290991	1.10257	0.140872	0.910695	#N/A
hsa-miR-668-3p	8.13995	0.300442	6.80313	0.0849465	13.2342	3.3755	1.09679	0.133289	0.91457	#N/A
hsa-miR-6872-3p	2.44198	2.93765	2.05174	2.80323	5.18534	0.232793	1.09558	0.131701	0.90426	#N/A
hsa-miR-4638-5p	4.97441	6.8434	5.61528	6.88066	5.26273	7.44938	1.09419	0.129865	0.883047	#N/A
hsa-miR-6852-5p	2.71332	7.74473	3.77952	4.07743	1.62526	9.95191	1.09325	0.128628	0.89828	#N/A
hsa-miR-4670-5p	2.17065	0.333824	3.8875	0.169893	3.63748	3.08451	1.0905	0.124996	0.920009	#N/A
hsa-miR-6719-3p	3.79864	5.84193	3.23958	5.43657	6.26884	2.73532	1.08931	0.123417	0.887785	#N/A
hsa-miR-6866-5p	7.05462	3.00442	1.29583	4.92689	7.12017	0.34919	1.08787	0.121506	0.910451	#N/A
hsa-miR-4768-3p	12.1195	0.901326	4.64341	5.09679	7.19756	6.751	1.08379	0.116089	0.911857	#N/A
hsa-miR-4771	0.723551	2.37015	0.215972	3.31291	0.154786	0.232793	1.08303	0.115071	0.928698	#N/A
hsa-miR-548as-3p	17.9079	0.333824	1.94375	2.03871	14.9369	4.83046	1.08126	0.112719	0.924959	#N/A
hsa-miR-136-3p	4.43175	0.400589	7.45105	2.12366	5.18534	5.81983	1.0789	0.109562	0.92087	#N/A
hsa-miR-4719	1.26621	0.166912	4.31945	0.934411	1.31568	3.84109	1.07862	0.109181	0.930283	#N/A
hsa-miR-4438	1.80888	4.30633	3.1316	3.73764	4.33401	2.21153	1.074	0.102995	0.917298	#N/A
hsa-miR-544a	4.25086	2.16986	0.863889	1.1043	3.86965	2.85172	1.07287	0.101473	0.921938	#N/A
hsa-miR-4495	1.26621	2.83751	0.107986	2.12366	0	2.44433	1.06919	0.0965168	0.943115	#N/A
hsa-miR-10226	1.98977	5.67501	4.53542	1.61398	7.97149	3.55009	1.06895	0.0961964	0.917137	#N/A
hsa-miR-1270	11.6673	3.43839	2.80764	10.8731	4.87577	3.3755	1.06706	0.0936391	0.928987	#N/A
hsa-miR-122-3p	0.994883	0.801179	9.3948	1.78388	5.80448	4.24847	1.06704	0.0936201	0.932173	#N/A
hsa-miR-767-3p	1.62799	1.36868	2.15972	1.44409	1.1609	2.50253	1.06105	0.0854972	0.939263	#N/A
hsa-miR-548ad-3p	4.70308	3.43839	1.94375	4.16238	3.4053	3.3173	1.05627	0.0789819	0.931189	#N/A
hsa-miR-874-5p	0.542663	6.94355	7.45105	4.33227	3.71487	7.74037	1.05519	0.0774964	0.940603	#N/A
hsa-miR-6802-3p	9.85838	4.07266	0.539931	3.99248	8.43585	2.85172	1.05313	0.0746802	0.944315	#N/A
hsa-miR-6509-3p	5.33619	8.57929	3.1316	10.8731	2.86354	4.42307	1.05168	0.0726907	0.937516	#N/A
hsa-miR-6835-5p	6.05974	2.57045	6.69514	1.69893	10.5255	3.78289	1.05045	0.0710123	0.935793	#N/A
hsa-miR-7162-3p	4.16042	5.20766	4.75139	4.92689	6.42363	3.84109	1.04481	0.0632366	0.94242	#N/A
hsa-miR-593-3p	2.2611	7.17722	2.91563	4.67206	2.39919	5.87803	1.02912	0.0414154	0.963237	#N/A
hsa-miR-6857-3p	5.42663	9.21355	3.45556	4.50216	4.87577	9.42812	1.02755	0.0392035	0.964284	#N/A
hsa-miR-764	6.05974	6.24252	1.40382	3.22797	5.34012	5.64523	1.02559	0.0364519	0.96688	#N/A
hsa-miR-548au-3p	1.98977	2.73736	2.69965	2.29355	3.09572	2.50253	1.0253	0.0360409	0.97121	#N/A
hsa-miR-3614-5p	4.97441	0.634266	2.80764	2.12366	4.17923	2.21153	1.02524	0.0359562	0.975582	#N/A
hsa-miR-4680-5p	1.17577	0.166912	2.91563	2.63334	1.62526	0.0581983	1.02005	0.0286337	0.98361	#N/A
hsa-miR-513c-5p	1.89932	3.00442	0	4.41722	0.232179	0.407388	1.01568	0.0224401	0.986861	#N/A
hsa-miR-197-5p	2.98465	0.300442	2.05174	0.934411	1.78004	2.56072	1.01396	0.0200044	0.987009	#N/A
hsa-miR-6728-3p	2.98465	8.51252	3.23958	3.14302	1.54786	10.3011	1.01209	0.017337	0.985853	#N/A
hsa-miR-4463	2.98465	3.0378	0.215972	3.90754	2.2444	0.232793	1.00866	0.0124349	0.99158	#N/A
hsa-miR-7154-5p	2.53243	0.233677	3.45556	1.69893	0.232179	4.24847	1.00609	0.00875538	0.994482	#N/A
hsa-miR-3198	8.50172	5.7084	0.755903	3.4828	5.80448	5.76163	1.00139	0.00199721	0.998268	#N/A
hsa-miR-4252	2.44198	2.70398	2.3757	3.99248	1.62526	2.09514	-1.0007	-0.00100718	0.999191	#N/A
hsa-miR-3152-3p	2.71332	4.9406	7.55903	7.1355	5.34012	2.73532	-1.00208	-0.00299961	0.997611	#N/A
hsa-miR-619-5p	1.98977	13.7869	0.539931	6.11614	2.47658	7.74037	-1.00736	-0.0105771	0.991426	#N/A
hsa-miR-3140-5p	2.17065	7.94502	3.56354	0.934411	7.97149	4.77226	-1.00781	-0.0112264	0.990747	#N/A
hsa-miR-106a-3p	8.68261	0.367207	0.215972	4.33227	1.93483	2.90991	-1.00812	-0.011668	0.992814	#N/A
hsa-miR-6730-3p	5.51708	4.30633	5.93924	2.97313	2.47658	10.0101	-1.00991	-0.0142208	0.988884	#N/A
hsa-miR-4663	1.98977	2.33677	3.02361	3.6527	0.386965	3.20091	-1.01307	-0.0187376	0.986673	#N/A
hsa-miR-6847-5p	1.62799	6.50958	0.755903	5.69141	1.85743	1.39676	-1.01613	-0.0230897	0.980107	#N/A
hsa-miR-5088-3p	1.17577	4.47325	3.99549	2.88818	3.63748	3.08451	-1.02023	-0.0288947	0.977235	#N/A
hsa-miR-4797-3p	2.17065	11.8841	2.15972	4.67206	8.04888	3.3173	-1.02545	-0.0362581	0.971471	#N/A
hsa-miR-581	2.62287	7.71134	2.59167	5.09679	1.47047	6.16902	-1.02785	-0.0396283	0.965688	#N/A
hsa-miR-516b-5p	2.80376	5.5081	3.02361	6.20109	1.39308	3.60829	-1.02837	-0.0403634	0.962234	#N/A
hsa-miR-188-3p	4.43175	0.166912	4.42743	0.169893	3.56008	4.94685	-1.03343	-0.0474428	0.970777	#N/A
hsa-miR-1324	6.96418	0.801179	7.34306	5.26668	2.2444	6.92559	-1.03752	-0.0531374	0.961254	#N/A
hsa-miR-4760-5p	1.98977	2.27001	4.96736	3.56775	1.62526	3.4919	-1.03981	-0.0563136	0.954799	#N/A
hsa-miR-4639-5p	3.25598	7.74473	1.07986	4.92689	3.3279	3.60829	-1.04047	-0.0572357	0.951512	#N/A
hsa-miR-6746-5p	3.88909	4.54001	5.61528	0.679572	10.7576	1.97874	-1.04772	-0.0672579	0.948845	#N/A
hsa-miR-6808-3p	9.94883	3.13795	1.29583	2.97313	2.47658	8.20596	-1.0498	-0.0701126	0.947412	#N/A
hsa-miR-4312	3.61775	2.80412	5.61528	6.62582	4.25662	0.581983	-1.05078	-0.0714578	0.945566	#N/A
hsa-miR-6769a-3p	2.08021	5.07413	2.48368	1.1043	4.17923	3.95748	-1.05754	-0.080711	0.931789	#N/A
hsa-miR-499b-5p	2.62287	4.84045	2.05174	2.03871	1.62526	5.41244	-1.05894	-0.0826256	0.937456	#N/A
hsa-miR-6529-3p	3.34642	6.2759	2.59167	8.66454	2.47658	0.465586	-1.06292	-0.0880355	0.93205	#N/A
hsa-miR-1290	5.51708	4.84045	11.7705	7.22045	7.50713	5.64523	-1.0719	-0.100167	0.918184	#N/A
hsa-miR-1289	0.452219	2.4703	2.15972	2.46345	2.01222	0.34919	-1.07515	-0.104542	0.930693	#N/A
hsa-miR-645	14.5615	0.300442	3.67153	1.1043	3.56008	12.5126	-1.0757	-0.105276	0.929048	#N/A
hsa-miR-558	5.78841	2.53707	4.96736	4.92689	0.851324	6.46001	-1.07791	-0.108231	0.911782	#N/A
hsa-miR-4650-3p	6.24063	2.77074	10.2587	6.28604	2.94094	8.32235	-1.08507	-0.117789	0.890524	#N/A
hsa-miR-1183	5.69796	7.91164	4.53542	10.7033	1.47047	4.65586	-1.08547	-0.118324	0.90422	#N/A
hsa-miR-4780	3.79864	8.41237	6.91111	9.00432	2.70876	5.99442	-1.08809	-0.121796	0.898591	#N/A
hsa-miR-4666a-3p	15.6468	2.03633	11.1226	14.356	7.73931	4.30667	-1.08844	-0.122262	0.895448	#N/A
hsa-miR-10524-5p	3.43687	7.14384	2.69965	4.07743	5.18534	3.3173	-1.09087	-0.125482	0.889537	#N/A
hsa-miR-3161	5.60752	3.93913	1.51181	2.20861	5.34012	2.61892	-1.09683	-0.133336	0.896716	#N/A
hsa-miR-8060	3.7082	5.24104	9.82674	4.84195	2.86354	9.25353	-1.09727	-0.13392	0.880992	#N/A
hsa-miR-181c-3p	5.78841	4.97398	9.50278	3.39786	5.03055	9.71911	-1.10109	-0.138926	0.875625	#N/A
hsa-miR-6767-5p	5.33619	2.50368	6.15521	1.86882	2.39919	8.26416	-1.10145	-0.139398	0.888841	#N/A
hsa-miR-6782-3p	0.723551	7.77811	3.67153	1.69893	7.12017	2.32793	-1.10283	-0.141207	0.890059	#N/A
hsa-miR-6515-5p	3.25598	6.97693	9.71875	10.5334	5.72709	1.86234	-1.10445	-0.143326	0.885553	#N/A
hsa-miR-4519	3.97953	2.77074	5.72327	3.14302	5.6497	2.32793	-1.10692	-0.146555	0.874436	#N/A
hsa-miR-8074	1.08533	1.56897	1.61979	1.61398	2.08961	0.232793	-1.10789	-0.14782	0.900102	#N/A
hsa-miR-137-5p	1.35666	6.70987	7.55903	2.63334	10.2159	1.28036	-1.10933	-0.149685	0.886269	#N/A
hsa-miR-1252-5p	4.97441	3.20471	11.1226	3.56775	9.20978	4.42307	-1.11199	-0.153144	0.88065	#N/A
hsa-miR-181d-3p	3.25598	0.767796	4.31945	3.22797	1.78004	2.32793	-1.11284	-0.154247	0.893976	#N/A
hsa-miR-2117	3.88909	1.3353	1.72778	3.99248	0.696538	1.51316	-1.11897	-0.162169	0.888542	#N/A
hsa-miR-6817-3p	3.43687	4.64016	7.775	5.77636	0.309572	8.03136	-1.12036	-0.163964	0.867549	#N/A
hsa-miR-6854-3p	1.4471	0.26706	2.3757	0.679572	1.23829	1.57135	-1.1214	-0.1653	0.8987	#N/A
hsa-miR-516a-5p	2.2611	2.30339	1.94375	2.12366	2.01222	1.86234	-1.12256	-0.166787	0.878689	#N/A
hsa-miR-5087	3.97953	4.13942	7.12709	4.757	8.35845	0.465586	-1.12373	-0.168294	0.861138	#N/A
hsa-miR-6841-3p	1.53755	0.367207	0.755903	2.12366	0.0773931	0.174595	-1.12379	-0.168369	0.90196	#N/A
hsa-miR-6740-3p	3.43687	2.37015	6.2632	6.62582	0.773931	3.2591	-1.12724	-0.172794	0.872869	#N/A
hsa-miR-10397-3p	1.71843	9.08002	2.91563	4.24732	3.09572	5.00505	-1.12989	-0.176184	0.851268	#N/A
hsa-miR-4530	3.16554	6.67649	0.971875	3.82259	2.86354	3.08451	-1.13395	-0.181356	0.859795	#N/A
hsa-miR-12129	2.98465	2.97104	9.3948	2.03871	5.95927	5.35424	-1.1358	-0.183713	0.846669	#N/A
hsa-miR-5091	1.17577	0.13353	2.69965	1.35914	2.01222	0.116397	-1.13755	-0.185925	0.890063	#N/A
hsa-miR-4712-5p	2.8942	0.300442	6.15521	0.339786	7.66192	0.174595	-1.14032	-0.189439	0.888752	#N/A
hsa-miR-1322	3.88909	3.43839	3.56354	1.78388	3.3279	4.19028	-1.14076	-0.189998	0.837168	#N/A
hsa-miR-2113	4.88397	7.31075	4.21146	3.4828	2.16701	8.67154	-1.14745	-0.198432	0.838755	#N/A
hsa-miR-6748-3p	3.61775	3.97251	3.99549	3.99248	4.95316	1.22216	-1.15155	-0.203571	0.839561	#N/A
hsa-miR-4743-3p	1.08533	10.4153	2.69965	6.54088	5.10794	0.756578	-1.15729	-0.210751	0.843398	#N/A
hsa-miR-1257	2.53243	1.83603	2.05174	2.20861	0.154786	3.14271	-1.15897	-0.212841	0.860004	#N/A
hsa-miR-1263	14.1997	3.17133	3.34757	10.8731	3.25051	3.66649	-1.16425	-0.219399	0.815264	#N/A
hsa-miR-520a-5p	4.79353	2.03633	3.77952	1.86882	3.4053	3.55009	-1.16427	-0.219422	0.826539	#N/A
hsa-miR-32-3p	2.35154	6.97693	1.94375	6.54088	0.154786	3.02631	-1.16915	-0.225465	0.839963	#N/A
hsa-miR-3617-5p	2.35154	11.2833	3.56354	7.39034	3.4053	4.13208	-1.16979	-0.22625	0.810767	#N/A
hsa-miR-6829-5p	3.43687	0.667649	1.51181	1.61398	1.85743	1.22216	-1.17025	-0.226822	0.846852	#N/A
hsa-miR-766-5p	3.79864	5.44134	1.18785	3.82259	5.10794	0	-1.17479	-0.232399	0.835412	#N/A
hsa-miR-4766-5p	10.8533	6.24252	5.72327	4.84195	3.48269	10.9413	-1.17695	-0.235052	0.798497	#N/A
hsa-miR-6761-3p	2.71332	2.50368	4.10347	0.849465	3.3279	3.55009	-1.18311	-0.242579	0.813448	#N/A
hsa-miR-5687	2.80376	0.13353	2.69965	2.46345	2.08961	0.174595	-1.1863	-0.246467	0.854902	#N/A
hsa-miR-1295b-3p	3.16554	6.0756	7.0191	6.20109	5.5723	2.03694	-1.18649	-0.246701	0.777104	#N/A
hsa-miR-10398-5p	5.78841	1.56897	7.775	2.88818	2.70876	6.92559	-1.19061	-0.2517	0.799707	#N/A
hsa-miR-1231	10.5819	3.6053	9.3948	5.60647	6.7332	7.04199	-1.199	-0.261826	0.759758	#N/A
hsa-miR-3935	4.43175	6.10899	9.93473	7.05056	9.90632	0.116397	-1.20053	-0.263666	0.809698	#N/A
hsa-miR-7973	2.44198	4.23957	0.755903	1.78388	4.10183	0.407388	-1.20402	-0.267857	0.809377	#N/A
hsa-miR-4471	3.79864	8.51252	2.15972	4.67206	2.86354	4.71406	-1.20563	-0.269787	0.780807	#N/A
hsa-miR-4535	7.86862	4.9406	2.91563	6.11614	3.4053	3.60829	-1.20633	-0.270622	0.782175	#N/A
hsa-miR-617	2.53243	4.3731	2.80764	7.64518	0.154786	0.290991	-1.20809	-0.272722	0.823263	#N/A
hsa-miR-6846-5p	1.53755	3.30486	1.61979	1.01936	2.94094	1.57135	-1.21113	-0.276355	0.784249	#N/A
hsa-miR-3692-5p	3.25598	4.80707	9.82674	6.62582	3.56008	4.48127	-1.21137	-0.276637	0.784033	#N/A
hsa-miR-3180-5p	5.1553	5.74178	1.40382	2.71829	2.70876	4.83046	-1.21215	-0.277566	0.763135	#N/A
hsa-miR-4683	2.35154	4.50663	0.539931	3.90754	0.309572	1.97874	-1.21282	-0.278371	0.809472	#N/A
hsa-miR-141-3p	9.22527	5.27443	8.31493	8.74949	1.00611	8.96253	-1.2155	-0.281555	0.765065	#N/A
hsa-miR-6507-5p	1.08533	3.67207	4.10347	2.20861	5.10794	0	-1.21556	-0.281619	0.819794	#N/A
hsa-miR-8066	2.53243	5.84193	7.775	12.2323	0.851324	0.174595	-1.22107	-0.288147	0.792899	#N/A
hsa-miR-3689a-5p	1.26621	9.68091	3.56354	4.41722	2.2444	5.35424	-1.22122	-0.288323	0.768177	#N/A
hsa-miR-1245a	3.52731	8.37899	2.15972	4.50216	4.72098	2.50253	-1.22883	-0.297289	0.759706	#N/A
hsa-miR-1288-3p	5.42663	8.07855	3.02361	7.05056	6.11405	0.34919	-1.23144	-0.300344	0.773579	#N/A
hsa-miR-4491	2.62287	6.50958	5.18334	3.82259	6.7332	1.16397	-1.23323	-0.302446	0.737913	#N/A
hsa-miR-1224-5p	5.1553	4.57339	4.53542	2.97313	3.4053	4.65586	-1.23964	-0.309926	0.700151	#N/A
hsa-miR-4520-3p	6.87373	6.2759	3.67153	4.84195	5.41752	3.66649	-1.23995	-0.310285	0.724302	#N/A
hsa-miR-4639-3p	1.98977	4.27295	1.07986	1.1043	4.79837	0.0581983	-1.24536	-0.316561	0.786826	#N/A
hsa-miR-3622a-3p	10.5819	3.87236	0.215972	4.58711	2.94094	4.24847	-1.24692	-0.318367	0.772957	#N/A
hsa-miR-3670	3.16554	6.20913	3.99549	1.44409	2.32179	6.92559	-1.25004	-0.321975	0.745246	#N/A
hsa-miR-9-3p	7.14507	7.91164	7.88299	10.9581	0.928717	6.46001	-1.25187	-0.324087	0.739598	#N/A
hsa-miR-3942-5p	0.271332	6.20913	1.18785	1.61398	4.56619	0	-1.25251	-0.324819	0.793618	#N/A
hsa-miR-10401-3p	4.43175	4.54001	6.15521	6.0312	4.17923	1.92054	-1.25323	-0.325656	0.693774	#N/A
hsa-miR-4653-3p	6.69285	0.13353	0.107986	5.09679	0.0773931	0.34919	-1.2568	-0.32975	0.826393	#N/A
hsa-miR-95-3p	2.98465	5.67501	7.99098	1.44409	9.59674	2.21153	-1.25691	-0.329887	0.723611	#N/A
hsa-miR-4769-3p	1.80888	10.3486	3.56354	3.05807	2.08961	7.44938	-1.25697	-0.329945	0.736023	#N/A
hsa-miR-3115	7.4164	2.16986	6.58716	5.60647	7.12017	0.116397	-1.25888	-0.332144	0.75624	#N/A
hsa-miR-3652	7.95906	2.93765	14.9021	7.73013	6.03666	6.51821	-1.26034	-0.333817	0.707082	#N/A
hsa-miR-6843-3p	23.0632	0.968091	3.56354	6.0312	3.79226	11.9888	-1.26206	-0.335778	0.761579	#N/A
hsa-miR-938	0.904439	1.96956	0.215972	0.934411	1.54786	0.0581983	-1.26384	-0.337817	0.796048	#N/A
hsa-miR-4477a	0.542663	2.23662	3.99549	3.90754	1.47047	0	-1.26422	-0.338253	0.799152	#N/A
hsa-miR-3199	3.52731	8.5459	3.99549	5.09679	5.03055	2.85172	-1.27076	-0.345687	0.709831	#N/A
hsa-miR-153-3p	10.0393	7.04369	7.12709	9.514	1.62526	7.85677	-1.27341	-0.348701	0.709305	#N/A
hsa-miR-4258	7.23551	3.17133	5.93924	1.78388	10.835	0.174595	-1.27762	-0.353462	0.725644	#N/A
hsa-miR-758-5p	2.80376	9.58076	8.74688	10.5334	3.48269	2.61892	-1.27826	-0.35418	0.716495	#N/A
hsa-miR-5579-5p	4.61264	0.400589	1.61979	1.69893	0.154786	3.2591	-1.28392	-0.360559	0.775764	#N/A
hsa-miR-924	1.35666	3.8056	3.67153	1.1043	4.64359	1.16397	-1.28841	-0.365593	0.727862	#N/A
hsa-miR-1262	10.6724	1.93618	2.80764	5.77636	1.23829	4.88866	-1.29008	-0.367461	0.731175	#N/A
hsa-miR-26a-1-3p	1.89932	13.7869	2.05174	4.33227	9.20978	0.290991	-1.29081	-0.368275	0.708492	#N/A
hsa-miR-3162-5p	3.25598	8.57929	1.72778	6.11614	4.02444	0.465586	-1.29381	-0.371624	0.71764	#N/A
hsa-miR-153-5p	0.271332	0.200295	1.83576	1.69893	0.0773931	0	-1.29479	-0.372713	0.802921	#N/A
hsa-miR-6743-3p	2.53243	13.1193	4.64341	7.39034	6.19145	2.26973	-1.29546	-0.373467	0.683747	#N/A
hsa-miR-548ae-3p	4.88397	1.36868	3.77952	0.849465	4.56619	2.21153	-1.29975	-0.378233	0.723001	#N/A
hsa-miR-1250-5p	3.34642	0.333824	2.3757	1.44409	0.541752	2.56072	-1.30418	-0.383144	0.763063	#N/A
hsa-miR-572	4.97441	6.57634	3.23958	2.88818	2.70876	5.81983	-1.30466	-0.383674	0.659347	#N/A
hsa-miR-6071	3.79864	9.81444	8.63889	5.43657	5.34012	6.34361	-1.31016	-0.389743	0.667335	#N/A
hsa-miR-1273h-3p	10.8533	4.20619	3.02361	3.22797	4.4888	5.99442	-1.31109	-0.390764	0.703847	#N/A
hsa-miR-1236-5p	1.62799	3.27148	3.77952	3.90754	2.47658	0.290991	-1.31182	-0.391568	0.714265	#N/A
hsa-miR-892c-5p	2.08021	5.5081	0.431945	1.35914	2.01222	2.85172	-1.31338	-0.393283	0.711127	#N/A
hsa-miR-145-5p	1.17577	5.57487	2.80764	6.0312	1.23829	0.0581983	-1.31591	-0.396059	0.725643	#N/A
hsa-miR-3677-3p	7.95906	8.24546	4.21146	3.99248	9.67414	1.92054	-1.31876	-0.399184	0.679295	#N/A
hsa-miR-4694-5p	0.994883	2.80412	2.05174	0.254839	2.39919	1.80415	-1.32122	-0.401868	0.731752	#N/A
hsa-miR-3650	4.25086	1.76927	4.53542	3.6527	3.71487	0.581983	-1.32453	-0.405478	0.709721	#N/A
hsa-miR-584-3p	5.69796	3.50516	11.3385	4.757	1.0835	9.48632	-1.33083	-0.412328	0.658852	#N/A
hsa-miR-6874-5p	11.5768	0.534119	0.863889	4.33227	3.3279	2.03694	-1.33571	-0.417607	0.717965	#N/A
hsa-miR-4796-5p	0.633107	0.0333824	2.59167	0.339786	2.01222	0.0581983	-1.33746	-0.419498	0.771464	#N/A
hsa-miR-7154-3p	7.32595	2.90427	2.91563	6.28604	2.39919	1.16397	-1.33901	-0.421166	0.697995	#N/A
hsa-miR-5008-3p	1.08533	0.500737	5.29132	3.39786	0	1.68775	-1.3453	-0.427923	0.75864	#N/A
hsa-miR-8069	4.52219	4.20619	1.72778	3.82259	0.928717	3.08451	-1.34706	-0.429817	0.653034	#N/A
hsa-miR-488-5p	3.25598	7.01031	1.07986	1.78388	0.0773931	6.57641	-1.34795	-0.430765	0.711985	#N/A
hsa-miR-6884-3p	1.80888	0.333824	1.94375	0.934411	0	2.03694	-1.3507	-0.433702	0.754873	#N/A
hsa-miR-4494	2.53243	5.90869	0.539931	4.92689	1.47047	0.34919	-1.35165	-0.434718	0.697471	#N/A
hsa-miR-4755-3p	3.16554	1.135	5.83125	6.0312	1.1609	0.290991	-1.35229	-0.435409	0.727213	#N/A
hsa-miR-9898	1.89932	1.73589	0.107986	0.764518	0.154786	1.86234	-1.35245	-0.435578	0.735904	#N/A
hsa-miR-6825-3p	1.26621	15.5228	0.647917	5.01184	4.4888	3.4919	-1.35375	-0.436957	0.658135	#N/A
hsa-miR-4275	2.62287	0.26706	0.215972	1.52904	0	0.756578	-1.35481	-0.438092	0.756316	#N/A
hsa-miR-361-3p	2.71332	5.44134	4.85938	3.6527	1.39308	4.53947	-1.36092	-0.444579	0.603139	#N/A
hsa-miR-922	4.34131	4.64016	0.215972	4.16238	2.47658	0.174595	-1.36193	-0.445648	0.687368	#N/A
hsa-miR-4464	3.7082	12.0844	3.34757	3.14302	8.43585	2.61892	-1.36383	-0.447668	0.647341	#N/A
hsa-miR-552-3p	9.31572	2.80412	7.23507	7.73013	3.48269	2.85172	-1.37027	-0.454463	0.658906	#N/A
hsa-miR-3660	1.98977	2.60383	2.80764	1.61398	3.63748	0.174595	-1.37376	-0.458134	0.683001	#N/A
hsa-miR-4649-5p	1.89932	14.0206	4.21146	1.18925	10.9898	2.50253	-1.37895	-0.463569	0.624854	#N/A
hsa-miR-138-2-3p	1.80888	4.00589	1.18785	3.99248	1.00611	0.174595	-1.37908	-0.46371	0.666975	#N/A
hsa-miR-8076	2.8942	2.80412	6.2632	3.73764	4.87577	0.0581983	-1.38022	-0.464894	0.690832	#N/A
hsa-miR-6811-3p	5.33619	9.21355	6.58716	3.82259	3.94705	7.56578	-1.38236	-0.467136	0.611633	#N/A
hsa-miR-3684	0.994883	2.53707	0.431945	1.61398	1.1609	0.232793	-1.3839	-0.468738	0.695391	#N/A
hsa-miR-5707	1.4471	3.40501	0.431945	2.71829	1.00611	0.174595	-1.39286	-0.478055	0.695759	#N/A
hsa-miR-937-5p	15.1041	0.300442	2.3757	2.3785	2.01222	8.32235	-1.39333	-0.47854	0.693071	#N/A
hsa-miR-3668	3.97953	4.33972	11.8785	8.23981	3.17312	3.02631	-1.3942	-0.479442	0.617413	#N/A
hsa-miR-4537	2.8942	0.801179	7.12709	2.3785	3.25051	1.97874	-1.40201	-0.487497	0.677716	#N/A
hsa-miR-5004-5p	0.452219	13.5533	3.02361	6.62582	1.1609	4.42307	-1.40385	-0.489384	0.65023	#N/A
hsa-miR-4721	1.80888	9.71429	3.77952	0.934411	9.90632	0.0581983	-1.40945	-0.495128	0.670779	#N/A
hsa-miR-605-3p	1.98977	0.600884	1.72778	2.71829	0.232179	0.116397	-1.41062	-0.496331	0.712166	#N/A
hsa-miR-1302	15.8277	0.834561	2.26771	1.18925	1.78004	10.3593	-1.41449	-0.500281	0.648894	#N/A
hsa-miR-508-3p	11.6673	4.33972	5.83125	3.73764	2.78615	8.72974	-1.4185	-0.50437	0.587336	#N/A
hsa-miR-6832-5p	5.42663	3.07118	4.31945	3.90754	2.08961	2.85172	-1.41969	-0.505577	0.611857	#N/A
hsa-miR-4778-5p	0.994883	7.07708	2.15972	2.54839	2.01222	2.79352	-1.41995	-0.505839	0.622136	#N/A
hsa-miR-10527-5p	5.78841	4.03928	18.2497	2.80323	7.97149	8.84614	-1.4207	-0.5066	0.609093	#N/A
hsa-miR-6080	1.62799	6.30928	2.26771	3.31291	1.1609	2.85172	-1.42212	-0.508047	0.57758	#N/A
hsa-miR-1298-3p	6.78329	3.20471	5.61528	2.80323	2.70876	5.17965	-1.42229	-0.508212	0.608766	#N/A
hsa-miR-6794-3p	5.87885	0.233677	1.07986	1.18925	0.0773931	3.72469	-1.42965	-0.515664	0.696184	#N/A
hsa-miR-3164	2.8942	0.634266	2.3757	1.86882	1.85743	0.34919	-1.43698	-0.52304	0.677779	#N/A
hsa-miR-16-1-3p	3.7082	2.60383	1.07986	1.52904	3.48269	0.174595	-1.43793	-0.523997	0.649642	#N/A
hsa-miR-5584-3p	5.24574	0.367207	1.07986	3.05807	0.232179	1.33856	-1.44032	-0.526387	0.691573	#N/A
hsa-miR-642b-5p	2.80376	11.3166	5.72327	6.54088	1.31568	5.93622	-1.44734	-0.533403	0.571421	#N/A
hsa-miR-203b-3p	8.23039	4.90722	3.8875	3.4828	2.86354	5.29604	-1.44749	-0.533558	0.583036	#N/A
hsa-miR-338-3p	5.9693	2.6706	3.1316	7.56023	0	0.581983	-1.44828	-0.534341	0.661081	#N/A
hsa-miR-7150	4.06997	3.20471	1.94375	2.20861	0.464359	3.66649	-1.44874	-0.534802	0.610824	#N/A
hsa-miR-3189-3p	4.52219	4.3731	17.6017	4.58711	8.43585	5.06325	-1.45552	-0.54153	0.564401	#N/A
hsa-miR-6776-5p	8.32084	7.44428	3.77952	4.58711	3.4053	5.52884	-1.45595	-0.541958	0.577686	#N/A
hsa-miR-7112-5p	5.33619	3.37163	4.85938	2.63334	1.78004	4.65586	-1.45728	-0.543282	0.558558	#N/A
hsa-miR-7849-3p	1.53755	3.43839	6.2632	0.679572	6.03666	0.989371	-1.4573	-0.543293	0.59286	#N/A
hsa-miR-630	3.61775	0.233677	5.29132	2.03871	2.86354	1.28036	-1.46426	-0.55017	0.643547	#N/A
hsa-miR-4800-5p	1.62799	5.90869	3.8875	1.44409	2.32179	4.07388	-1.46491	-0.550811	0.513437	#N/A
hsa-miR-4678	1.98977	3.07118	3.02361	2.63334	1.62526	1.57135	-1.46612	-0.552005	0.578609	#N/A
hsa-miR-873-5p	4.34131	2.77074	0.107986	1.2742	0.154786	3.4919	-1.46615	-0.552035	0.658441	#N/A
hsa-miR-1233-5p	6.24063	9.74767	4.10347	3.99248	5.18534	4.83046	-1.46706	-0.552926	0.545445	#N/A
hsa-miR-513b-5p	1.53755	10.1149	3.34757	2.3785	4.56619	3.3755	-1.47294	-0.558698	0.574465	#N/A
hsa-miR-6727-5p	5.78841	5.94207	4.75139	1.61398	9.05499	0.523784	-1.47669	-0.562363	0.555702	#N/A
hsa-miR-663b	3.97953	12.5184	3.67153	6.88066	1.0835	5.76163	-1.47971	-0.565315	0.5718	#N/A
hsa-miR-4709-5p	6.51196	0.233677	2.26771	2.63334	0.0773931	3.3173	-1.48699	-0.572391	0.65887	#N/A
hsa-miR-329-5p	1.80888	0.13353	5.83125	2.29355	1.23829	1.62955	-1.48845	-0.573807	0.655182	#N/A
hsa-miR-3194-3p	2.98465	6.0756	1.83576	3.6527	2.55397	1.33856	-1.48878	-0.574135	0.520376	#N/A
hsa-miR-4750-5p	6.96418	9.84782	6.58716	5.18173	10.2159	0.34919	-1.49073	-0.576022	0.564678	#N/A
hsa-miR-659-5p	3.61775	2.6706	1.40382	5.09679	0.0773931	0	-1.49329	-0.578498	0.677709	#N/A
hsa-miR-4305	0.994883	2.93765	3.8875	2.46345	2.78615	0	-1.49575	-0.580869	0.629554	#N/A
hsa-miR-4303	1.35666	6.91016	3.77952	6.37098	0.386965	1.33856	-1.50084	-0.585771	0.543124	#N/A
hsa-miR-5584-5p	1.62799	13.1861	4.53542	6.45593	1.1609	5.35424	-1.50131	-0.586221	0.575681	#N/A
hsa-miR-383-3p	4.25086	2.06971	1.18785	1.52904	3.09572	0.407388	-1.50228	-0.587152	0.622436	#N/A
hsa-miR-93-3p	8.8635	4.20619	10.2587	3.56775	3.71487	7.97316	-1.50512	-0.589878	0.525161	#N/A
hsa-miR-3126-3p	5.87885	8.41237	5.93924	6.37098	6.88799	0.232793	-1.50533	-0.590084	0.567021	#N/A
hsa-miR-628-5p	14.9232	3.67207	10.6906	6.20109	6.26884	6.8092	-1.50585	-0.59058	0.5036	#N/A
hsa-miR-4501	1.62799	0.867943	3.02361	3.05807	0.309572	0.290991	-1.50748	-0.592139	0.648202	#N/A
hsa-miR-1284	20.7116	0.166912	8.96285	3.39786	9.13239	7.21659	-1.50826	-0.592888	0.588007	#N/A
hsa-miR-3914	5.1553	10.4153	5.29132	5.52152	5.5723	3.02631	-1.51126	-0.595749	0.498408	#N/A
hsa-miR-452-5p	2.44198	3.97251	7.45105	2.54839	1.31568	5.17965	-1.51438	-0.598727	0.547357	#N/A
hsa-miR-6068	5.42663	4.87384	16.4139	4.84195	8.04888	4.53947	-1.52178	-0.605755	0.539502	#N/A
hsa-miR-6516-3p	3.07509	0.567501	7.23507	4.16238	0.928717	1.97874	-1.52566	-0.609433	0.613511	#N/A
hsa-miR-520d-5p	7.05462	5.5081	2.80764	2.97313	3.3279	3.84109	-1.52569	-0.609463	0.530008	#N/A
hsa-miR-3928-5p	5.06486	5.20766	1.18785	1.1043	3.48269	2.96811	-1.52773	-0.611389	0.55667	#N/A
hsa-miR-576-3p	9.31572	9.58076	2.05174	2.12366	5.5723	6.05262	-1.52852	-0.612138	0.500739	#N/A
hsa-miR-3197	1.80888	2.16986	1.83576	0.679572	2.70876	0.465586	-1.52944	-0.613006	0.60452	#N/A
hsa-miR-5692a	3.34642	4.97398	0.647917	4.07743	1.78004	0.0581983	-1.53187	-0.61529	0.575698	#N/A
hsa-miR-1539	3.34642	2.33677	0.755903	1.2742	0	2.90991	-1.53529	-0.618513	0.635822	#N/A
hsa-miR-4671-5p	3.34642	3.20471	4.31945	3.56775	3.17312	0.34919	-1.54175	-0.624572	0.563827	#N/A
hsa-miR-6081	3.34642	12.7521	4.64341	7.56023	3.01833	2.96811	-1.55136	-0.633534	0.518939	#N/A
hsa-miR-12127	1.08533	5.5081	0.215972	2.80323	1.23829	0.407388	-1.56457	-0.645764	0.569378	#N/A
hsa-miR-3915	4.97441	5.10751	3.34757	5.86131	0.309572	2.44433	-1.56586	-0.646951	0.557257	#N/A
hsa-miR-302b-5p	1.62799	4.60678	1.29583	0.934411	0.773931	3.14271	-1.56655	-0.647591	0.553838	#N/A
hsa-miR-3614-3p	6.69285	8.57929	7.12709	8.15486	4.87577	1.33856	-1.57082	-0.651516	0.488266	#N/A
hsa-miR-4999-5p	0.542663	1.03486	0.323958	0.934411	0.232179	0.174595	-1.57614	-0.656397	0.614411	#N/A
hsa-miR-1179	1.71843	3.43839	1.18785	1.69893	1.93483	0.581983	-1.57674	-0.656943	0.536827	#N/A
hsa-miR-8071	5.24574	7.44428	3.23958	2.03871	3.71487	4.42307	-1.58226	-0.661991	0.463074	#N/A
hsa-miR-3059-5p	15.1946	0.567501	11.7705	2.46345	4.4888	10.1847	-1.59967	-0.677779	0.500357	#N/A
hsa-miR-6502-3p	4.97441	5.60825	3.67153	1.69893	0.309572	6.8674	-1.59985	-0.677933	0.46649	#N/A
hsa-miR-603	3.61775	0.13353	1.29583	1.1043	1.85743	0.174595	-1.60076	-0.67876	0.617271	#N/A
hsa-miR-489-3p	20.8925	2.03633	2.91563	2.71829	3.94705	9.36992	-1.60559	-0.683105	0.498036	#N/A
hsa-miR-6868-5p	5.87885	7.07708	1.61979	5.35163	3.4053	0.34919	-1.6145	-0.691085	0.499524	#N/A
hsa-miR-4470	18.0888	0.367207	3.77952	4.07743	0.154786	9.48632	-1.6169	-0.693226	0.562218	#N/A
hsa-miR-3619-3p	3.16554	6.14237	3.1316	2.03871	2.70876	3.14271	-1.61958	-0.695616	0.409878	#N/A
hsa-miR-191-3p	12.843	2.57045	6.04723	1.78388	7.58452	3.78289	-1.62357	-0.699169	0.424879	#N/A
hsa-miR-4688	7.05462	0.701031	4.31945	2.71829	3.48269	1.10577	-1.643	-0.71633	0.540309	#N/A
hsa-miR-133a-5p	2.17065	7.54443	4.85938	0.764518	3.63748	4.48127	-1.64302	-0.716353	0.436104	#N/A
hsa-miR-2276-3p	1.89932	8.67943	1.61979	3.56775	1.62526	2.32793	-1.65366	-0.725659	0.426491	#N/A
hsa-miR-664b-5p	2.8942	2.90427	0.323958	1.69893	1.78004	0.290991	-1.65667	-0.728287	0.547107	#N/A
hsa-miR-3145-3p	0.542663	9.64752	3.99549	2.3785	6.19145	0	-1.66148	-0.732465	0.531031	#N/A
hsa-miR-3138	0.361775	3.0378	0	1.95377	0.0773931	0.0581983	-1.66444	-0.735039	0.601852	#N/A
hsa-miR-412-5p	9.04439	0.433972	10.1507	1.95377	9.20978	0.465586	-1.68452	-0.752334	0.534413	#N/A
hsa-miR-935	14.7424	0.367207	21.5972	0.254839	18.8839	2.61892	-1.68528	-0.752988	0.519769	#N/A
hsa-miR-4648	1.53755	0.233677	3.23958	0.424732	0.232179	2.21153	-1.69724	-0.76319	0.574121	#N/A
hsa-miR-6089	2.62287	7.9784	4.96736	3.4828	2.08961	3.72469	-1.69744	-0.763365	0.398022	#N/A
hsa-miR-1208	2.08021	6.81002	3.45556	4.84195	2.16701	0.34919	-1.69875	-0.76447	0.419779	#N/A
hsa-miR-4755-5p	7.77817	2.73736	7.34306	3.05807	5.6497	1.68775	-1.70815	-0.772431	0.434434	#N/A
hsa-miR-376a-5p	6.15018	0.300442	0.215972	0.849465	0.154786	2.85172	-1.7135	-0.776947	0.577963	#N/A
hsa-miR-7846-3p	1.17577	10.6156	3.1316	2.46345	3.01833	3.3173	-1.71583	-0.778908	0.436538	#N/A
hsa-miR-6072	1.53755	0.367207	6.15521	3.82259	0.773931	0.0581983	-1.72715	-0.788391	0.56826	#N/A
hsa-miR-4511	3.07509	8.04517	7.0191	1.35914	7.58452	1.57135	-1.73154	-0.792054	0.433191	#N/A
hsa-miR-381-5p	2.35154	7.4109	5.93924	4.41722	3.17312	1.57135	-1.73934	-0.798539	0.365937	#N/A
hsa-miR-1-5p	3.61775	2.87089	4.53542	2.46345	2.16701	1.51316	-1.74659	-0.804544	0.405111	#N/A
hsa-miR-4704-5p	1.53755	0.13353	1.72778	0.849465	1.00611	0.0581983	-1.75611	-0.812387	0.55136	#N/A
hsa-miR-4726-3p	7.23551	4.84045	1.29583	1.44409	5.72709	0.465586	-1.75855	-0.81439	0.446897	#N/A
hsa-miR-6818-5p	13.1144	6.20913	4.85938	9.08927	0.0773931	4.53947	-1.7646	-0.819345	0.422662	#N/A
hsa-miR-4640-5p	1.71843	5.67501	4.85938	5.26668	0.851324	0.814776	-1.78417	-0.835252	0.443417	#N/A
hsa-miR-3065-3p	3.43687	3.33824	2.91563	1.61398	3.56008	0.290991	-1.78777	-0.838162	0.427019	#N/A
hsa-miR-7111-3p	2.53243	10.9161	3.23958	3.6527	1.39308	4.36487	-1.79027	-0.840177	0.402198	#N/A
hsa-miR-122b-5p	4.70308	4.20619	2.26771	1.2742	1.70265	3.20091	-1.79658	-0.845257	0.367911	#N/A
hsa-miR-589-5p	15.3755	0.26706	9.93473	0.254839	13.6986	0.174595	-1.8087	-0.854957	0.524989	#N/A
hsa-miR-934	0.994883	0.300442	5.29132	1.95377	1.39308	0.232793	-1.82558	-0.868355	0.523042	#N/A
hsa-miR-5190	4.43175	3.30486	4.85938	1.2742	1.62526	3.78289	-1.82636	-0.868968	0.407884	#N/A
hsa-miR-4677-3p	3.79864	1.30192	5.07535	2.46345	2.86354	0.174595	-1.84578	-0.884229	0.466738	#N/A
hsa-miR-490-3p	4.70308	9.3137	3.99549	6.28604	0.309572	3.20091	-1.84755	-0.885614	0.395824	#N/A
hsa-miR-4636	1.62799	6.34266	4.53542	0.849465	1.93483	3.95748	-1.85137	-0.888596	0.31337	#N/A
hsa-miR-6834-5p	6.96418	6.8434	0.647917	1.61398	4.02444	2.21153	-1.85224	-0.889271	0.383252	#N/A
hsa-miR-488-3p	6.69285	4.57339	9.3948	4.24732	2.78615	3.84109	-1.85805	-0.893787	0.295212	#N/A
hsa-miR-6073	2.35154	3.63869	2.26771	0.509679	1.0835	2.79352	-1.86381	-0.898255	0.373066	#N/A
hsa-miR-3121-5p	6.69285	5.97546	11.6625	4.92689	3.01833	4.77226	-1.88201	-0.912274	0.301993	#N/A
hsa-miR-4474-5p	4.25086	2.10309	5.83125	1.86882	1.85743	2.50253	-1.88582	-0.915196	0.364984	#N/A
hsa-miR-5007-5p	1.4471	5.90869	1.29583	2.20861	0	2.38613	-1.89258	-0.920355	0.404144	#N/A
hsa-miR-627-5p	7.23551	11.7506	2.80764	3.90754	0.0773931	7.50758	-1.89674	-0.923522	0.389212	#N/A
hsa-miR-143-3p	10.2202	7.21061	4.53542	6.37098	4.41141	0.814776	-1.90489	-0.929705	0.33035	#N/A
hsa-miR-101-5p	0.633107	0.367207	5.72327	1.86882	1.54786	0.0581983	-1.92457	-0.944536	0.503522	#N/A
hsa-miR-8053	1.53755	7.91164	3.45556	0.594625	2.63137	3.4919	-1.92761	-0.946816	0.317358	#N/A
hsa-miR-10522-5p	6.69285	6.94355	6.69514	4.24732	3.86965	2.79352	-1.92945	-0.948193	0.286735	#N/A
hsa-miR-219a-2-3p	5.06486	9.78105	12.6344	2.71829	5.26273	6.11082	-1.93784	-0.954449	0.296838	#N/A
hsa-miR-7158-5p	1.53755	5.17428	3.56354	1.78388	0.154786	3.3173	-1.95206	-0.964994	0.348358	#N/A
hsa-miR-1256	9.76794	0.534119	4.75139	5.01184	0.232179	2.44433	-1.95208	-0.96501	0.445688	#N/A
hsa-miR-4652-5p	1.80888	5.77516	3.45556	0.594625	4.72098	0.34919	-1.96181	-0.972186	0.375391	#N/A
hsa-miR-299-3p	6.78329	6.87678	6.58716	0.679572	9.51935	0.116397	-1.96425	-0.97398	0.387278	#N/A
hsa-miR-6886-3p	1.89932	4.47325	10.1507	3.56775	1.85743	2.90991	-1.96954	-0.977857	0.359126	#N/A
hsa-miR-769-5p	5.69796	5.77516	12.2024	1.61398	6.42363	3.84109	-1.97826	-0.98423	0.283196	#N/A
hsa-miR-6076	4.61264	3.83898	0.755903	2.46345	2.01222	0.232793	-1.97914	-0.984874	0.366819	#N/A
hsa-miR-4738-5p	0.813995	10.1816	1.61979	1.69893	3.4053	1.33856	-1.98341	-0.987981	0.348866	#N/A
hsa-miR-6733-3p	6.78329	5.77516	7.55903	8.49465	1.47047	0.174595	-1.98896	-0.992013	0.342623	#N/A
hsa-miR-545-5p	0.813995	3.13795	2.26771	0	0	3.08451	-2.00331	-1.00239	0.474014	#N/A
hsa-miR-3944-5p	7.59729	10.3486	11.4465	5.69141	6.03666	3.08451	-2.0052	-1.00375	0.275873	#N/A
hsa-miR-4774-5p	7.95906	6.20913	9.3948	0.339786	1.54786	9.77731	-2.00847	-1.0061	0.315576	#N/A
hsa-miR-6772-5p	1.17577	10.9828	9.82674	4.757	6.03666	0.174595	-2.00962	-1.00692	0.338392	#N/A
hsa-miR-4486	1.17577	6.24252	2.15972	4.24732	0.154786	0.407388	-2.01371	-1.00985	0.374297	#N/A
hsa-miR-4645-3p	2.53243	1.86942	3.77952	3.6527	0	0.407388	-2.01821	-1.01307	0.431292	#N/A
hsa-miR-4734	0.994883	6.47619	0.215972	1.2742	2.01222	0.523784	-2.05473	-1.03895	0.359504	#N/A
hsa-miR-8075	5.33619	1.00147	3.8875	4.24732	0.309572	0.407388	-2.05979	-1.0425	0.398876	#N/A
hsa-miR-504-3p	4.25086	0.333824	3.8875	1.18925	2.78615	0.116397	-2.06128	-1.04354	0.41869	#N/A
hsa-miR-551a	4.06997	7.4109	0.431945	2.03871	1.0835	2.67712	-2.06966	-1.04939	0.33574	#N/A
hsa-miR-3151-5p	2.53243	6.44281	2.91563	3.4828	1.1609	1.22216	-2.07774	-1.05502	0.263621	#N/A
hsa-miR-6529-5p	0.361775	6.70987	1.72778	3.56775	0.154786	0.523784	-2.09614	-1.06774	0.373997	#N/A
hsa-miR-4751	5.9693	3.50516	8.63889	3.90754	2.08961	2.50253	-2.10237	-1.07202	0.249598	#N/A
hsa-miR-4786-5p	5.06486	5.07413	5.93924	5.18173	2.32179	0.174595	-2.10347	-1.07277	0.330892	#N/A
hsa-miR-629-3p	14.2901	8.57929	6.80313	4.92689	8.74542	0.290991	-2.12824	-1.08966	0.270664	#N/A
hsa-miR-548az-5p	2.80376	6.20913	3.77952	1.52904	4.33401	0.174595	-2.13395	-1.09353	0.246699	#N/A
hsa-miR-2277-3p	1.35666	3.20471	2.15972	0.679572	0.0773931	2.32793	-2.15758	-1.10941	0.36302	#N/A
hsa-miR-6834-3p	2.8942	7.34414	1.40382	0.764518	2.08961	2.56072	-2.16902	-1.11705	0.293335	#N/A
hsa-miR-2052	0.633107	4.40648	2.80764	3.56775	0	0.0581983	-2.17598	-1.12166	0.37911	#N/A
hsa-miR-873-3p	4.52219	3.47177	1.61979	3.4828	0.696538	0.290991	-2.17622	-1.12182	0.307116	#N/A
hsa-miR-6878-5p	2.8942	2.27001	12.7424	4.16238	2.16701	1.80415	-2.18829	-1.1298	0.307805	#N/A
hsa-miR-4424	1.98977	0.166912	2.91563	1.18925	0.928717	0.174595	-2.19003	-1.13095	0.388974	#N/A
hsa-miR-4669	2.80376	7.24399	1.94375	2.80323	2.39919	0.34919	-2.19778	-1.13604	0.235415	#N/A
hsa-miR-548l	7.50684	0.26706	9.93473	2.88818	4.79837	0.34919	-2.19844	-1.13648	0.346921	#N/A
hsa-miR-4693-3p	2.98465	5.34119	9.82674	4.07743	1.54786	2.56072	-2.21034	-1.14427	0.182917	#N/A
hsa-miR-4754	13.4761	7.77811	0.323958	1.95377	5.26273	2.50253	-2.222	-1.15186	0.291689	#N/A
hsa-miR-592	20.4403	6.60972	3.99549	6.96561	2.08961	4.88866	-2.22442	-1.15343	0.245091	#N/A
hsa-miR-518e-3p	18.3601	1.7025	14.0382	6.96561	3.63748	4.59766	-2.23552	-1.16061	0.195258	#N/A
hsa-miR-1182	8.8635	2.90427	1.83576	3.14302	2.55397	0.407388	-2.23669	-1.16137	0.28067	#N/A
hsa-miR-5003-3p	2.08021	10.8827	13.4983	5.43657	6.11405	0.232793	-2.24959	-1.16966	0.273497	#N/A
hsa-miR-489-5p	2.62287	2.40354	2.3757	0.424732	2.39919	0.465586	-2.26001	-1.17633	0.3241	#N/A
hsa-miR-6858-3p	3.52731	5.57487	5.93924	1.52904	4.79837	0.34919	-2.26197	-1.17758	0.20988	#N/A
hsa-miR-548ao-3p	5.42663	6.00884	4.64341	3.99248	2.2444	0.931172	-2.28513	-1.19228	0.148362	#N/A
hsa-miR-6814-3p	0.0904439	5.54148	2.05174	2.29355	0.619145	0.465586	-2.3049	-1.20471	0.305022	#N/A
hsa-miR-11181-3p	4.43175	9.81444	2.80764	3.82259	3.4053	0.232793	-2.30664	-1.2058	0.24437	#N/A
hsa-miR-3680-3p	7.50684	5.24104	4.31945	6.62582	0.541752	0.232793	-2.31491	-1.21096	0.290722	#N/A
hsa-miR-6810-5p	17.6366	1.03486	0.431945	3.6527	2.2444	2.32793	-2.31807	-1.21293	0.30209	#N/A
hsa-miR-593-5p	3.88909	7.91164	3.99549	4.41722	0	2.38613	-2.32611	-1.21792	0.258032	#N/A
hsa-miR-4652-3p	3.97953	3.27148	6.37118	3.39786	2.16701	0.290991	-2.33496	-1.2234	0.257572	#N/A
hsa-miR-8086	1.17577	6.34266	1.07986	0.424732	1.54786	1.74595	-2.3367	-1.22447	0.271969	#N/A
hsa-miR-5585-5p	1.98977	2.13648	3.1316	1.78388	1.0835	0.290991	-2.33756	-1.225	0.287721	#N/A
hsa-miR-597-3p	1.4471	2.30339	2.48368	2.3785	0	0.290991	-2.35181	-1.23377	0.332796	#N/A
hsa-miR-192-3p	14.1092	0.367207	3.67153	2.88818	4.64359	0.174595	-2.35218	-1.234	0.320524	#N/A
hsa-miR-6820-5p	6.15018	2.97104	9.17882	3.39786	3.17312	1.16397	-2.35658	-1.23669	0.189585	#N/A
hsa-miR-4536-3p	0.994883	7.11046	2.3757	3.22797	1.0835	0.174595	-2.36901	-1.24429	0.232062	#N/A
hsa-miR-4715-3p	27.9472	4.07266	3.56354	3.99248	3.09572	7.79857	-2.38176	-1.25203	0.19364	#N/A
hsa-miR-4445-5p	9.49661	3.93913	1.83576	4.24732	0.232179	1.92054	-2.38792	-1.25576	0.22922	#N/A
hsa-miR-3944-3p	3.61775	4.57339	2.69965	1.44409	2.78615	0.34919	-2.41639	-1.27285	0.211493	#N/A
hsa-miR-6831-3p	3.79864	0.400589	0.971875	0.679572	1.31568	0.116397	-2.43785	-1.28561	0.334873	#N/A
hsa-miR-1238-5p	10.0393	3.40501	7.0191	4.58711	1.1609	2.56072	-2.45193	-1.29392	0.179148	#N/A
hsa-miR-4527	0.904439	12.485	1.94375	1.52904	4.64359	0.116397	-2.45281	-1.29444	0.235571	#N/A
hsa-miR-4804-3p	3.97953	2.53707	2.15972	2.71829	0.619145	0.232793	-2.46026	-1.29881	0.280733	#N/A
hsa-miR-548a-3p	14.3806	3.53854	6.2632	4.67206	4.87577	0.116397	-2.50321	-1.32378	0.207848	#N/A
hsa-miR-548g-3p	5.06486	2.37015	3.77952	0.764518	3.17312	0.523784	-2.50809	-1.32659	0.21887	#N/A
hsa-miR-891a-5p	8.8635	1.30192	6.15521	2.46345	1.39308	2.50253	-2.53582	-1.34245	0.213419	#N/A
hsa-miR-5586-3p	5.06486	9.21355	5.83125	1.35914	3.01833	3.55009	-2.53669	-1.34295	0.148937	#N/A
hsa-miR-6851-3p	0.994883	1.30192	8.53091	3.82259	0.154786	0.232793	-2.56846	-1.36091	0.296778	#N/A
hsa-miR-3907	2.8942	3.53854	0.647917	0.764518	0.232179	1.74595	-2.57063	-1.36212	0.243272	#N/A
hsa-miR-6511b-5p	16.1895	3.40501	5.72327	1.78388	5.03055	2.96811	-2.57393	-1.36397	0.113775	#N/A
hsa-miR-4642	28.6707	3.63869	5.39931	4.16238	6.7332	3.60829	-2.59483	-1.37564	0.145606	#N/A
hsa-miR-4798-5p	1.17577	0.500737	1.83576	0.934411	0.154786	0.232793	-2.6164	-1.38758	0.286746	#N/A
hsa-miR-3616-3p	0.813995	13.0859	5.83125	2.12366	0.773931	4.59766	-2.63195	-1.39613	0.170319	#N/A
hsa-miR-4742-3p	4.97441	0.200295	1.51181	0.424732	1.85743	0.232793	-2.63921	-1.4001	0.30568	#N/A
hsa-miR-3622a-5p	0.904439	0.467354	1.18785	0.679572	0.232179	0.0581983	-2.64204	-1.40165	0.296363	#N/A
hsa-miR-4433b-5p	25.053	0.233677	2.15972	2.80323	2.94094	4.59766	-2.64628	-1.40397	0.231568	#N/A
hsa-miR-150-3p	17.1843	1.66912	1.83576	1.52904	2.08961	4.07388	-2.67216	-1.418	0.212381	#N/A
hsa-miR-199a-5p	4.34131	0.200295	10.1507	3.14302	1.1609	1.16397	-2.67331	-1.41863	0.252136	#N/A
hsa-miR-598-5p	3.61775	0.367207	0.323958	1.35914	0.0773931	0.174595	-2.67502	-1.41955	0.304944	#N/A
hsa-miR-585-3p	1.89932	9.64752	2.69965	3.73764	1.47047	0.174595	-2.67587	-1.42001	0.157719	#N/A
hsa-miR-708-3p	5.87885	3.07118	3.8875	0.254839	4.41141	0.116397	-2.68205	-1.42334	0.228429	#N/A
hsa-miR-9899	5.24574	16.2572	2.15972	1.52904	6.26884	1.04757	-2.69094	-1.42811	0.143988	#N/A
hsa-miR-6082	2.44198	0.13353	7.88299	0.254839	3.17312	0.407388	-2.70792	-1.43719	0.281166	#N/A
hsa-miR-640	22.9727	3.83898	10.1507	5.86131	1.54786	6.16902	-2.71078	-1.43871	0.115353	#N/A
[truncated: 95 more rows]

## Sheet: mature miRNA
Name	HMBEC-flow-RBCs-1	HBMEC-flow-RBCs-2	HBMEC-flow-RBCs-3	HBMEC-flow-IT4-rings-1	HBMEC-flow-IT4-rings-2	HBMEC-flow-IT4-rings-3	Fold change	Log fold change	P-value	FDR
hsa-miR-136-5p	36.937	0.902986	9.37536	0	0	0.0471361	-693.263	-9.43726	7.86868e-06	0.00565758
hsa-miR-337-5p	109.777	15.8023	54.214	0	2.23887	0.0942722	-77.4862	-6.27587	7.49162e-05	0.0269324
hsa-miR-144-3p	2880.61	1264.18	982.724	148.796	19.8	117.51	-17.9188	-4.1634	0.000282679	0.0638654
hsa-miR-490-5p	0	32.959	0.116464	0.0466299	0	0	-494.262	-8.94913	0.000355301	0.0638654
hsa-miR-1228-5p	0	44.2463	0.931713	0	0	0	-2558.11	-11.3209	0.000453993	0.0652842
hsa-miR-377-3p	119.928	4.96643	17.8772	0	3.28834	0.0942722	-42.3016	-5.40264	0.000836541	0.0668303
hsa-miR-4508	0.704904	24.8321	0.58232	0	0	0	-1459.13	-10.5109	0.00079165	0.0668303
hsa-miR-3136-3p	3.99446	26.6381	0.757017	0	0	0	-1750.85	-10.7738	0.000617154	0.0668303
hsa-miR-2277-3p	0.0939872	37.4739	0.989945	0	0	0	-2173.26	-11.0856	0.000657089	0.0668303
hsa-miR-187-3p	0.610917	0	1.4558	29.0505	2.09894	31.9583	26.3755	4.72112	0.00120345	0.0669942
hsa-miR-550a-3-5p	3.90047	1.35448	4.3674	0	0.0699647	0	-168.74	-7.39865	0.0012113	0.0669942
hsa-miR-1236-3p	0.140981	28.8956	0	0	0	0	-1641.71	-10.681	0.0011008	0.0669942
hsa-miR-1469	0	33.862	0	0	0	0	-1922.62	-10.9089	0.00119655	0.0669942
hsa-miR-296-5p	2.63164	0.451493	4.25094	0	0.0699647	0	-113.203	-6.82277	0.00168991	0.0867888
hsa-miR-4492	0	25.2836	0	0	0	0	-1432.97	-10.4848	0.00192756	0.0923945
hsa-miR-548at-3p	0.281962	16.2538	0.058232	0	0	0	-926.618	-9.85583	0.00217896	0.0979171
hsa-miR-144-5p	184.873	265.93	304.728	21.8228	3.28834	27.1975	-14.4226	-3.85026	0.00263883	0.0998589
hsa-miR-148a-3p	63.4883	9.48136	32.0859	1.35227	3.28834	0.0471361	-22.5265	-4.49355	0.00247674	0.0998589
hsa-miR-1268a	3.80648	138.608	2.32928	2.37813	0	2.49821	-29.46	-4.88068	0.00250079	0.0998589
hsa-miR-548h-5p	1.4568	1.35448	5.93967	0	0	0	-516.993	-9.014	0.00296658	0.106648
hsa-miR-142-5p	174.816	53.2762	66.5592	8.16024	9.02544	2.63962	-14.9112	-3.89832	0.00422124	0.121403
hsa-miR-191-3p	7.47198	12.1903	3.0863	145.392	11.824	131.038	12.8861	3.68775	0.00402851	0.121403
hsa-miR-142-3p	467.257	79.0113	175.628	13.3828	11.4042	41.8097	-10.8433	-3.43874	0.00364852	0.121403
hsa-miR-216a-5p	31.5797	1.35448	16.8291	0	1.39929	0.0942722	-33.6594	-5.07294	0.003948	0.121403
hsa-miR-301b-3p	5.40426	0.451493	1.39757	0	0	0	-435.684	-8.76714	0.00408481	0.121403
hsa-miR-497-5p	10.4796	4.06344	5.47381	128.652	10.2848	114.588	12.4684	3.6402	0.0046255	0.126307
hsa-miR-10400-5p	0.375949	10.3843	0	0	0	0	-597.621	-9.22309	0.0047431	0.126307
hsa-miR-147b-3p	0.0939872	0.451493	0.058232	8.44002	0	11.1241	42.0012	5.39236	0.00575511	0.14166
hsa-miR-15a-5p	1029.96	700.266	689.642	98.1094	59.8198	136.789	-8.20958	-3.03731	0.00567292	0.14166
hsa-miR-1185-1-3p	8.88179	0	0.232928	0	0	0	-528.316	-9.04526	0.00591069	0.14166
hsa-miR-542-3p	0	0	0	2.7978	0	7.25896	327.136	8.35375	0.00667969	0.141662
hsa-miR-155-3p	0	0	0.058232	2.70454	0	6.74046	89.3977	6.48217	0.00809867	0.141662
hsa-miR-195-3p	0.234968	0.902986	1.10641	18.6053	0	28.2817	20.9573	4.38938	0.00991961	0.141662
hsa-miR-451a	691093	1.27409e+06	971058	233877	201469	138508	-5.1167	-2.35521	0.0110335	0.141662
hsa-miR-16-5p	97749.9	24670.5	25171.4	4185.08	2085.93	17413.8	-6.23151	-2.63958	0.00964725	0.141662
hsa-miR-190a-5p	59.7758	37.4739	79.6614	7.18101	3.49823	3.29953	-12.6907	-3.6657	0.0109369	0.141662
hsa-miR-9-5p	16.0248	848.356	12.3452	49.8474	2.79859	4.76074	-15.2586	-3.93155	0.00964166	0.141662
hsa-miR-184	2.86661	187.821	2.38751	7.69394	0.139929	0.471361	-23.1377	-4.53217	0.00752656	0.141662
hsa-miR-1277-3p	5.96819	58.6941	18.2266	2.28487	1.11943	0	-24.1286	-4.59267	0.00781335	0.141662
hsa-miR-374a-3p	2.49066	1.35448	11.3552	0.41967	0	0	-34.2933	-5.09986	0.00925347	0.141662
hsa-miR-6842-3p	0.939872	0	1.68873	0	0.0699647	0	-48.5375	-5.60103	0.0104704	0.141662
hsa-miR-4467	0	33.862	0.058232	0.466299	0	0	-69.2404	-6.11354	0.00911822	0.141662
hsa-miR-641	0.422942	0.902986	2.27105	0	0	0	-211.669	-7.72567	0.0103536	0.141662
hsa-miR-3912-3p	1.08085	0.451493	1.68873	0	0	0	-221.049	-7.78822	0.00962318	0.141662
hsa-miR-380-5p	1.22183	0	2.50398	0	0	0	-243.123	-7.92554	0.0109913	0.141662
hsa-miR-590-5p	0.469936	0.451493	3.20276	0	0	0	-249.953	-7.96551	0.0103789	0.141662
hsa-miR-500a-3p	1.73876	0	1.4558	0	0	0	-259.019	-8.01691	0.010611	0.141662
hsa-miR-127-5p	2.44367	0.451493	1.10641	0	0	0	-263.306	-8.04059	0.00844106	0.141662
hsa-miR-548o-3p	2.58465	0.451493	1.04818	0	0	0	-264.562	-8.04746	0.00823014	0.141662
hsa-miR-6885-3p	2.81962	0.451493	1.04818	0	0	0	-275.98	-8.10842	0.00853155	0.141662
hsa-miR-33b-3p	1.31582	0	3.26099	0	0	0	-283.795	-8.1487	0.00860104	0.141662
hsa-miR-501-5p	2.72563	0.902986	0.989945	0	0	0	-285.962	-8.15968	0.00772437	0.141662
hsa-miR-6791-3p	3.05458	0	2.50398	0	0	0	-345.607	-8.43299	0.00791358	0.141662
hsa-miR-584-3p	1.17484	0.451493	4.07624	0	0	0	-348.104	-8.44337	0.0066185	0.141662
hsa-miR-410-5p	2.16171	0	2.44575	0	0	0	-366.895	-8.51922	0.0063178	0.141662
hsa-miR-655-3p	2.39667	0	3.84331	0	0	0	-378.458	-8.56399	0.00733952	0.141662
hsa-miR-3064-5p	0	0.451493	0	1.21238	2.30883	2.54535	56.3591	5.81658	0.0115781	0.146047
hsa-miR-1307-5p	2.81962	0.451493	0.174696	0	0	0.0471361	-53.5446	-5.74267	0.0119434	0.148057
hsa-miR-362-3p	0.986865	0	2.32928	0	0	0	-217.545	-7.76517	0.0121959	0.148624
hsa-miR-138-1-3p	1.17484	0	0	9.69903	0	29.4129	30.1092	4.91213	0.0124093	0.148704
hsa-miR-6879-3p	4.79335	0	0	0	0	0	-281.001	-8.13443	0.0132622	0.15632
hsa-miR-30b-3p	0	0.451493	0.29116	4.38322	1.25936	8.01313	24.2241	4.59837	0.0138786	0.156656
hsa-miR-199a-5p	1.55079	0	2.03812	0.0466299	0	0.0942722	-28.6839	-4.84217	0.0151653	0.156656
hsa-miR-548c-5p	1.83275	0	1.16464	0.0466299	0.0699647	0	-33.3065	-5.05773	0.0145171	0.156656
hsa-miR-6513-5p	1.87974	0	0.698784	0	0	0	-175.536	-7.45563	0.0150985	0.156656
hsa-miR-551a	2.34968	0.451493	0.116464	0	0	0	-176.26	-7.46156	0.0152516	0.156656
hsa-let-7c-3p	1.50379	0.451493	0.698784	0	0	0	-177.082	-7.46827	0.0139347	0.156656
hsa-miR-4707-3p	0.422942	0	2.50398	0	0	0	-183.305	-7.5181	0.0142013	0.156656
hsa-miR-539-3p	0.892878	0	1.68873	0	0	0	-187.828	-7.55327	0.0144381	0.156656
hsa-miR-3679-5p	0	0.451493	2.9116	0	0	0	-197.821	-7.62805	0.0146399	0.156656
hsa-miR-106a-5p	18.6095	52.8247	18.9254	1.81857	3.98799	3.29953	-9.75949	-3.28681	0.0154979	0.156944
hsa-miR-548aq-3p	1.31582	1.80597	0.465856	0	0	0	-177.298	-7.47003	0.0164898	0.164669
hsa-miR-1285-5p	0.986865	0.451493	0.989945	0	0	0	-163.766	-7.35549	0.0174152	0.171527
hsa-miR-99b-5p	783.195	3862.98	776.408	10073.6	2388.87	13039.6	4.70372	2.2338	0.017917	0.174086
hsa-miR-345-3p	0.140981	0.902986	0	12.1238	0	9.42722	25.2659	4.65912	0.0218399	0.176158
hsa-miR-335-3p	1.22183	52.8247	0.757017	262.014	0.349823	458.776	13.2188	3.72452	0.0229798	0.176158
hsa-miR-16-2-3p	164.901	200.011	195.019	24.3408	27.4961	15.4606	-8.32414	-3.0573	0.021689	0.176158
hsa-miR-660-5p	46.4297	127.321	70.9849	8.2535	8.67562	8.24882	-9.61514	-3.26531	0.023864	0.176158
hsa-miR-505-3p	68.4697	4.96643	37.4432	0.466299	5.59717	3.62948	-11.4954	-3.52299	0.022489	0.176158
hsa-miR-495-3p	128.762	13.0933	51.186	0.0466299	13.2233	0.141408	-14.4133	-3.84932	0.0193512	0.176158
hsa-miR-1343-3p	1.59778	0	1.04818	0.0932599	0.0699647	0	-21.3504	-4.41619	0.0225082	0.176158
hsa-miR-1285-3p	6.72008	0	0.116464	0.23315	0	0.0471361	-23.078	-4.52845	0.0223589	0.176158
hsa-miR-6851-3p	0.187974	0.451493	1.10641	0.0466299	0	0	-26.591	-4.73286	0.0230383	0.176158
hsa-miR-4747-5p	0.704904	0	0.640552	0	0	0	-109.729	-6.7778	0.0240104	0.176158
hsa-miR-6505-3p	0.610917	0	0.815249	0	0	0	-113.909	-6.83174	0.0233547	0.176158
hsa-miR-6815-5p	0.610917	0.902986	0.698784	0	0	0	-113.993	-6.8328	0.0210657	0.176158
hsa-miR-502-5p	0.281962	0.902986	1.10641	0	0	0	-123.281	-6.9458	0.0198361	0.176158
hsa-miR-4662a-5p	0.939872	0.451493	0.524088	0	0	0	-126.164	-6.97915	0.019051	0.176158
hsa-miR-6818-3p	0.610917	0	1.04818	0	0	0	-129.889	-7.02114	0.0228227	0.176158
hsa-miR-548s	0.939872	0	0.640552	0	0	0	-130.456	-7.02742	0.0221059	0.176158
hsa-miR-6859-5p	0.187974	0.451493	1.6305	0	0	0	-137.479	-7.10306	0.0233021	0.176158
hsa-miR-20a-3p	1.03386	0	0.757017	0	0	0	-147.058	-7.20024	0.0237279	0.176158
hsa-miR-2682-5p	0.798891	0	1.04818	0	0	0	-147.131	-7.20096	0.0238853	0.176158
hsa-miR-4326	0.563923	0	1.57227	0	0	0	-147.925	-7.20872	0.0210218	0.176158
hsa-miR-523-3p	0.563923	0	1.6305	0	0	0	-150.536	-7.23397	0.022268	0.176158
hsa-miR-3135a	0.939872	0	0.931713	0	0	0	-151.245	-7.24075	0.0234681	0.176158
hsa-miR-659-5p	0.798891	0	1.16464	0	0	0	-155.45	-7.28031	0.0229726	0.176158
hsa-miR-628-5p	0.751897	0	1.39757	0	0	0	-161.75	-7.33762	0.0201771	0.176158
hsa-miR-548ad-5p	8.17688	53.2762	20.6141	2.05172	2.44876	2.07399	-12.2616	-3.61608	0.0243941	0.176951
hsa-miR-5193	0.140981	0.451493	1.22287	0	0	0	-108.427	-6.76058	0.0247162	0.176951
hsa-miR-6514-3p	0.375949	0	1.74696	0	0	0	-139.686	-7.12605	0.0248569	0.176951
hsa-miR-302b-3p	0	0	0	0.27978	0	3.72375	130.678	7.02987	0.0259017	0.177365
hsa-miR-3960	0	30.25	1.04818	0	0.909541	0	-34.0087	-5.08783	0.0258112	0.177365
hsa-miR-1299	0.704904	0	0.640552	0	0	0	-109.729	-6.7778	0.0252395	0.177365
hsa-miR-224-3p	1.55079	0	0.349392	0	0	0	-128.902	-7.01013	0.0255188	0.177365
hsa-miR-664a-5p	0	0	0	0.606189	0	2.82817	112.544	6.81434	0.0271875	0.181099
hsa-miR-454-3p	173.5	53.7277	261.404	26.8589	23.0883	20.3157	-6.97273	-2.80172	0.0276035	0.181099
hsa-miR-374a-5p	100.378	10.8358	40.1801	1.81857	5.38728	7.82459	-10.1102	-3.33773	0.0274058	0.181099
hsa-miR-217-5p	15.6489	0.451493	3.0863	0	1.04947	0	-18.4968	-4.2092	0.0277063	0.181099
hsa-miR-3117-3p	0.375949	0	1.16464	0	0	0	-110.133	-6.7831	0.0267462	0.181099
hsa-miR-329-5p	0.328955	0	1.10641	0	0	0	-102.498	-6.67946	0.0282113	0.182738
hsa-miR-548l	2.11471	0.902986	4.94972	0.37304	0.0699647	0	-17.695	-4.14527	0.0286223	0.183745
hsa-miR-106b-5p	211.424	113.325	125.315	23.1751	4.19788	35.9177	-7.10836	-2.82952	0.0288846	0.183788
hsa-miR-6800-3p	0.187974	0	1.57227	0	0	0	-114.696	-6.84167	0.0293189	0.184915
hsa-miR-4677-3p	0.65791	0	0.58232	0	0	0	-101.424	-6.66425	0.0297549	0.186033
hsa-miR-5100	4.60537	11.2873	5.9979	41.5473	4.33781	119.207	7.63868	2.93332	0.0302135	0.187271
hsa-miR-548aq-5p	0.187974	0.451493	0.873481	0	0	0	-88.314	-6.46457	0.0311136	0.189582
hsa-miR-548ac	1.26883	0.451493	0	0	0	0	-102.124	-6.67418	0.0310925	0.189582
hsa-miR-590-3p	48.8733	135.448	78.9044	15.3413	17.911	2.3568	-7.37941	-2.88351	0.0319301	0.191193
hsa-miR-193b-5p	0.563923	0	0.58232	0	0	0	-93.1272	-6.54113	0.0324416	0.191193
hsa-miR-1268b	0.0469936	0.451493	1.10641	0	0	0	-94.1674	-6.55716	0.0323407	0.191193
hsa-miR-4785	0.328955	0	0.989945	0	0	0	-96.4551	-6.59179	0.0317618	0.191193
hsa-miR-3189-3p	0.563923	0	0.640552	0	0	0	-97.2854	-6.60415	0.0328679	0.19213
hsa-miR-1294	20.3482	26.1866	25.9133	0.23315	6.57668	0	-10.6539	-3.41331	0.0341012	0.193061
hsa-miR-6833-3p	5.1223	36.1195	5.53204	0.559559	0	2.82817	-13.5739	-3.76277	0.0337296	0.193061
hsa-miR-548az-5p	0.845885	0	0.349392	0	0	0	-94.3889	-6.56055	0.0339141	0.193061
hsa-miR-520c-3p	0.516929	0	0.698784	0	0	0	-97.2951	-6.6043	0.0340751	0.193061
hsa-miR-1273c	0.328955	0	0.815249	0	0	0	-87.0657	-6.44403	0.0345384	0.194009
hsa-miR-5094	0	0.451493	1.10641	0	0	0	-90.9977	-6.50776	0.03511	0.195691
hsa-miR-548ar-5p	0.328955	0	0.873481	0	0	0	-90.2673	-6.49613	0.0354091	0.19584
hsa-miR-4646-5p	0	0	1.86343	0	0	0	-114.23	-6.83579	0.0360745	0.197997
hsa-miR-4787-3p	0.0939872	0.451493	1.2811	0	0	0.0942722	-16.1174	-4.01054	0.0384178	0.209261
hsa-miR-23b-5p	2.81962	0	2.56221	17.2997	4.33781	26.3962	8.03289	3.00592	0.0406859	0.218385
hsa-miR-576-3p	1.73876	0	0	0	0	0	-108.063	-6.75573	0.0407004	0.218385
hsa-miR-1908-3p	0	0	1.4558	0	0	0	-91.0908	-6.50923	0.0417608	0.222415
hsa-miR-181c-3p	0	0	0	0	0	2.63962	85.8811	6.42427	0.04252	0.224793
hsa-miR-503-3p	0.328955	0.902986	0.757017	10.212	0	16.0734	13.4995	3.75484	0.0428755	0.225018
hsa-miR-624-5p	42.6232	52.8247	50.7783	7.92709	9.79505	3.62948	-6.85763	-2.77771	0.0433298	0.225754
hsa-miR-8485	0	0	0	0	0	2.26253	73.7641	6.20485	0.045449	0.231525
hsa-miR-3613-5p	48.2624	105.649	94.9765	14.0356	21.9689	2.3568	-6.48556	-2.69723	0.0449719	0.231525
hsa-miR-130b-3p	45.2078	2.70896	15.0821	1.53879	5.38728	1.93258	-7.19143	-2.84628	0.0453143	0.231525
hsa-miR-363-5p	0.234968	0	0.815249	0	0	0.0471361	-19.739	-4.30298	0.0457253	0.231525
hsa-miR-6515-3p	0.0469936	0	0	0	3.14841	0	32.965	5.04286	0.0472925	0.236134
hsa-miR-4732-5p	13.2992	115.582	11.5299	0	11.7541	2.59248	-9.76871	-3.28817	0.0472271	0.236134
hsa-miR-342-3p	75.0018	210.396	80.302	346.274	501.787	777.133	4.46468	2.15856	0.0483976	0.238792
hsa-miR-486-5p	2241.03	2833.57	3169.69	290.411	1555.1	440.817	-3.60601	-1.8504	0.0500185	0.238792
hsa-miR-1976	13.9101	1.35448	5.9979	1.11912	1.04947	0	-9.91959	-3.31028	0.050416	0.238792
hsa-miR-6793-3p	8.12989	0.902986	5.18265	0	1.11943	0	-12.9531	-3.69523	0.0504817	0.238792
hsa-miR-3162-3p	0.939872	0	0.058232	0	0	0	-69.1436	-6.11152	0.050192	0.238792
hsa-miR-7850-5p	0	0	1.16464	0	0	0	-74.4977	-6.21912	0.0501569	0.238792
hsa-miR-4749-5p	0	0	1.2811	0	0	0	-81.1456	-6.34244	0.049165	0.238792
hsa-miR-874-5p	0	0	1.33934	0	0	0	-84.4637	-6.40026	0.0485125	0.238792
hsa-miR-1275	0.187974	0	0	0	5.7371	0	21.927	4.45464	0.0514363	0.239382
hsa-miR-138-5p	8.0829	79.4628	18.9836	356.16	14.9724	381.991	7.10162	2.82815	0.0516054	0.239382
hsa-miR-370-3p	85.2464	13.5448	88.2798	0.0466299	18.1908	0	-10.2647	-3.35962	0.0509762	0.239382
hsa-miR-494-3p	42.2472	4.96643	10.7729	0	4.5477	0	-12.7813	-3.67596	0.0527819	0.24327
hsa-miR-597-3p	0	0	0	0	2.09894	0	67.8647	6.08459	0.0575727	0.256493
hsa-miR-7855-5p	0	0	0	0	0	1.93258	63.1587	5.98091	0.0562344	0.256493
hsa-miR-365b-5p	2.2087	1.80597	1.74696	24.947	6.36679	11.8783	7.37056	2.88178	0.0572496	0.256493
hsa-miR-150-5p	45.8657	473.616	27.4855	497.262	39.2502	2329.14	5.24309	2.39042	0.0572676	0.256493
hsa-let-7g-5p	15727.4	16746.8	15769.4	6258.21	3232.37	5876.69	-3.1393	-1.65044	0.0577912	0.256493
hsa-miR-518b	1.4568	0	0.058232	0	0.0699647	0	-22.9597	-4.52103	0.0565423	0.256493
hsa-miR-99b-3p	17.5756	7.67538	18.8672	85.939	40.7894	109.261	5.20608	2.3802	0.0601761	0.257125
hsa-miR-541-5p	0	0	0	0	2.02898	0	65.6104	6.03585	0.061773	0.257125
hsa-miR-4284	0	0	0	0	1.95901	0	63.3558	5.9854	0.0624819	0.257125
hsa-miR-6887-3p	0	0	0	0	0	1.88544	61.6434	5.94588	0.0588451	0.257125
hsa-miR-135b-5p	1.12785	1.35448	0.931713	18.1857	1.88905	7.966	8.43369	3.07616	0.06093	0.257125
hsa-miR-125a-3p	1.55079	0.451493	5.41558	21.2633	5.03746	22.6253	6.1571	2.62225	0.0616103	0.257125
hsa-miR-195-5p	156.442	102.037	26.088	275.77	3.00848	1219.55	5.26504	2.39644	0.0596084	0.257125
hsa-miR-7977	50.0482	659.18	56.7762	270.36	1073.96	2093.27	4.4916	2.16723	0.0625827	0.257125
hsa-miR-133a-3p	2.11471	42.4404	1.6305	4.01018	0.209894	0.518497	-9.59217	-3.26186	0.0619512	0.257125
hsa-miR-192-3p	0.939872	0	0	0	0	0	-62.6938	-5.97025	0.0589389	0.257125
hsa-miR-1238-3p	0.939872	0	0	0	0	0	-62.6938	-5.97025	0.0594658	0.257125
hsa-miR-758-5p	0.939872	0	0	0	0	0	-62.6938	-5.97025	0.0605463	0.257125
hsa-miR-6797-3p	0.939872	0	0	0	0	0	-62.6938	-5.97025	0.0622459	0.257125
hsa-miR-5010-5p	0	0	0	0	1.74912	0	56.5895	5.82246	0.0705104	0.277033
hsa-miR-573	0	0	0	0	1.74912	0	56.5895	5.82246	0.0703004	0.277033
hsa-miR-3191-3p	0	0	0	0	1.74912	0	56.5895	5.82246	0.0686025	0.277033
hsa-miR-4684-3p	0	0	0	0	1.46926	0	47.5611	5.57171	0.068281	0.277033
hsa-miR-5189-3p	0.986865	0	0.116464	0.839339	2.58869	9.1444	9.23464	3.20706	0.0697377	0.277033
hsa-let-7e-3p	53.0088	113.325	44.0817	359.517	94.5922	555.64	4.81652	2.26799	0.0695591	0.277033
hsa-miR-374b-5p	257.713	24.8321	139.64	17.4862	24.2078	40.0185	-5.17569	-2.37175	0.0686665	0.277033
hsa-miR-377-5p	4.98132	0	2.27105	0	0.559717	0	-13.3672	-3.74063	0.0699144	0.277033
hsa-miR-138-2-3p	0	0	0	1.67868	0	0	54.9791	5.78081	0.0710245	0.27748
hsa-miR-6858-3p	0	0	0	0	1.39929	0	45.3025	5.50152	0.0717752	0.27748
hsa-miR-10a-5p	554.007	4779.51	558.562	9402.84	1291.34	9586.3	3.44241	1.78342	0.0717819	0.27748
hsa-miR-6895-3p	0	0	0	0	1.39929	0	45.3025	5.50152	0.0723955	0.278355
hsa-miR-378g	0.0939872	0.451493	0.174696	3.35736	0.0699647	4.24225	13.3599	3.73984	0.0731805	0.279877
hsa-miR-187-5p	0	0	0	1.63205	0	0	53.4805	5.74094	0.0761041	0.289518
hsa-miR-26b-5p	3008.58	5408.89	4587	2024.07	1100.26	1151.16	-3.04123	-1.60465	0.0784029	0.296693
hsa-miR-4485-3p	10.9965	108.81	12.287	153.133	416.989	123.732	5.28669	2.40236	0.0805794	0.303333
hsa-miR-345-5p	229.47	198.206	72.5571	23.315	24.1378	56.799	-4.79291	-2.2609	0.0820243	0.307164
hsa-miR-548q	1.73876	1.80597	4.48387	0	0.839576	0	-9.85602	-3.30101	0.0828439	0.308626
hsa-miR-12136	4.55838	1.35448	4.3674	0	79.6198	0.0942722	7.67577	2.94031	0.0857837	0.317459
hsa-miR-20a-5p	186.565	227.553	206.666	56.329	24.3477	69.4315	-4.12893	-2.04577	0.0860979	0.317459
hsa-miR-30e-5p	268.192	80.8173	70.4608	19.911	4.7576	58.7316	-5.03067	-2.33075	0.0884645	0.32452
hsa-miR-6780a-5p	0.0469936	0	0	0.0466299	0	1.6969	18.1656	4.18313	0.0928964	0.335641
hsa-miR-3615	173.876	27.5411	85.9505	9.09284	12.5936	39.4058	-4.71255	-2.23651	0.0920575	0.335641
hsa-miR-211-5p	4.22942	0	0.232928	0.18652	0.209894	0.0471361	-10.5609	-3.40066	0.0926859	0.335641
hsa-miR-200b-5p	0.187974	13.5448	0.757017	1.16575	0.139929	0.0942722	-9.86782	-3.30273	0.0936885	0.33681
hsa-let-7e-5p	608.191	1490.38	665.825	4581.81	1213.33	2478.09	2.99399	1.58207	0.0958058	0.342708
hsa-miR-200a-3p	1.83275	3.61195	3.31923	0.559559	0.279859	0.282817	-6.95766	-2.7986	0.0963198	0.342841
hsa-miR-369-3p	12.5003	4.51493	36.1621	0.0466299	6.78657	0	-7.80667	-2.96471	0.0969386	0.343344
hsa-miR-744-3p	5.78021	0.902986	7.10431	31.382	11.824	32.7124	5.14128	2.36213	0.0989928	0.348901
hsa-miR-3613-3p	13.1112	1.80597	2.67867	0.979229	1.39929	0	-7.50641	-2.90812	0.099602	0.349336
hsa-miR-93-5p	5248.48	7872.24	5200.76	2536.25	1796.76	2039.67	-2.87433	-1.52323	0.100137	0.349506
hsa-miR-4473	3.61851	38.8284	0	2.19161	2.44876	0	-9.08168	-3.18296	0.101013	0.350861
hsa-miR-4433a-5p	0	0	0	0	0	0.989858	32.8416	5.03745	0.107963	0.351247
hsa-miR-200c-3p	0.140981	0	0	0	3.00848	0	14.3115	3.83911	0.105832	0.351247
hsa-miR-338-3p	0	0	0.407624	4.01018	0	2.2154	12.2049	3.60939	0.103024	0.351247
hsa-miR-10a-3p	4.51138	0.902986	5.93967	30.0297	2.51873	23.8037	4.77049	2.25414	0.10401	0.351247
hsa-let-7a-5p	42576.1	40980.7	42853.5	16051.7	19611.4	8091.33	-2.88909	-1.53062	0.107596	0.351247
hsa-miR-185-5p	1135.65	786.501	875.228	169.593	494.37	100.777	-3.65873	-1.87134	0.105343	0.351247
hsa-miR-15b-3p	78.3383	116.034	123.976	30.8224	24.4177	21.6826	-4.1202	-2.04272	0.107925	0.351247
hsa-miR-32-5p	207.806	126.418	97.6551	42.0602	3.91802	48.7387	-4.55834	-2.18851	0.101614	0.351247
hsa-miR-210-3p	10.6675	92.1046	10.2488	13.4761	1.04947	6.97614	-5.21752	-2.38336	0.103571	0.351247
hsa-miR-1-3p	9.39872	195.948	4.65856	29.61	2.44876	1.41408	-6.25703	-2.64548	0.105741	0.351247
hsa-miR-193b-3p	58.601	9.48136	69.6455	1.95846	19.1004	0	-6.54995	-2.71148	0.106294	0.351247
hsa-miR-124-3p	1.4568	47.8583	2.32928	5.17592	1.04947	0.471361	-7.6094	-2.92778	0.10673	0.351247
hsa-miR-361-3p	0.65791	0.902986	1.74696	0.37304	0	0	-8.30368	-3.05375	0.107634	0.351247
hsa-miR-3909	0.65791	37.4739	0.349392	0	3.49823	0	-10.9364	-3.45106	0.103585	0.351247
hsa-let-7f-5p	24744	35711.3	29711.7	17954.1	6291.08	7520.66	-2.83846	-1.50511	0.110377	0.357482
hsa-miR-328-3p	25.6585	265.478	30.3389	609.873	70.8742	669.898	4.21003	2.07383	0.113468	0.361292
hsa-miR-6129	1.26883	0.902986	0.407624	0.13989	0.0699647	0.141408	-6.81882	-2.76952	0.113563	0.361292
hsa-miR-3158-3p	19.1264	1.35448	6.58022	2.28487	1.53922	0	-7.12379	-2.83265	0.113286	0.361292
hsa-miR-4659b-3p	5.45126	1.35448	9.89945	1.30564	0.979505	0	-7.41366	-2.89019	0.113542	0.361292
hsa-miR-139-5p	730.327	2571.71	924.026	5795.4	1570.15	4745.33	2.86654	1.51931	0.114505	0.362684
hsa-let-7a-2-3p	28.3841	5.41792	12.5199	2.28487	4.7576	2.26253	-5.10491	-2.35189	0.116113	0.366162
hsa-miR-877-3p	1.97373	25.2836	1.2811	66.5876	1.11943	84.0436	5.39313	2.43112	0.119544	0.375335
hsa-miR-4485-5p	0.0469936	0	0.465856	0	7.27633	0	12.0036	3.5854	0.12326	0.385322
hsa-miR-942-5p	240.513	246.064	232.637	30.2162	111.174	40.4899	-3.95641	-1.98419	0.126654	0.392519
hsa-miR-106b-3p	54.1836	8.57837	36.5697	4.89614	2.72862	13.1038	-4.81575	-2.26776	0.126563	0.392519
hsa-miR-10b-3p	0.516929	0.902986	1.74696	6.24841	0	16.2619	6.98638	2.80454	0.128176	0.395531
hsa-miR-363-3p	184.45	307.918	290.054	42.4333	117.751	32.0054	-4.07104	-2.0254	0.129179	0.396923
hsa-miR-19b-3p	171.198	186.467	190.069	39.7287	47.506	70.4684	-3.4697	-1.79481	0.130917	0.399787
hsa-miR-6511a-3p	0.939872	34.765	0.640552	0	4.19788	0	-8.60793	-3.10567	0.131223	0.399787
hsa-miR-193a-5p	16.4947	3.16045	21.3712	12.4968	152.453	13.3866	4.30653	2.10653	0.133114	0.403613
hsa-miR-194-5p	1059.61	186.918	131.139	36.7444	67.1661	248.596	-3.90899	-1.9668	0.133624	0.403613
hsa-miR-19a-3p	13.2052	2.25747	7.80309	0	1.46926	2.2154	-6.37107	-2.67154	0.134163	0.403613
hsa-miR-937-3p	0.0469936	0	0	0	0	1.27267	13.4343	3.74785	0.1394	0.406843
hsa-miR-576-5p	91.0736	121.903	158.973	25.3667	62.3385	14.7536	-3.63355	-1.86138	0.139764	0.406843
hsa-miR-192-5p	216.593	398.669	282.251	93.9593	71.5739	64.3879	-3.8896	-1.95962	0.1369	0.406843
hsa-miR-186-5p	270.072	94.3621	75.7599	15.1547	7.27633	83.8551	-4.14239	-2.05047	0.139245	0.406843
hsa-miR-485-3p	194.365	19.4142	67.5492	0	53.5929	0.23568	-5.2288	-2.38648	0.139629	0.406843
hsa-miR-598-3p	11.9834	2.25747	10.3653	1.81857	2.30883	0	-6.02519	-2.59101	0.139311	0.406843
hsa-miR-154-3p	15.3199	4.06344	13.5681	0	4.96749	0.0471361	-6.60835	-2.72429	0.139759	0.406843
hsa-miR-548h-3p	6.67309	1.35448	3.84331	0.41967	1.39929	0	-6.74028	-2.75281	0.138818	0.406843
hsa-miR-3124-5p	2.44367	0.451493	1.6305	0	0.629682	0	-7.69841	-2.94456	0.142556	0.413296
hsa-miR-6799-3p	0.187974	0	0	0	2.58869	0	9.78285	3.29025	0.143643	0.414775
hsa-miR-874-3p	6.48512	0.451493	5.64851	19.5846	1.1894	35.5877	4.35265	2.1219	0.146424	0.421115
hsa-miR-1246	2.25569	1.80597	4.7168	0.23315	32.2537	5.84487	4.2926	2.10185	0.148618	0.425723
hsa-miR-34b-3p	6.76708	451.042	5.64851	559.046	32.6035	1292.9	4.06936	2.0248	0.151063	0.431011
hsa-miR-7112-3p	0.281962	0	0	0	1.11943	2.2154	8.59174	3.10295	0.1523	0.432822
hsa-miR-376b-3p	135.342	39.7314	221.456	0.0466299	82.0686	0.23568	-4.8168	-2.26808	0.156268	0.440613
hsa-miR-185-3p	9.63369	2.25747	17.9937	0.979229	1.60919	3.53521	-4.98402	-2.31731	0.156083	0.440613
hsa-miR-1973	0.0469936	51.0187	0	5.03603	1.04947	1.13127	-7.02603	-2.81271	0.15767	0.44283
hsa-miR-483-5p	0.0469936	0.451493	0	1.91183	0.279859	0	7.45409	2.89803	0.164192	0.45622
hsa-miR-1306-3p	3.00759	0.902986	2.9116	18.6986	4.7576	10.1343	4.47152	2.16077	0.164341	0.45622
hsa-miR-10401-3p	19.2674	70.4329	31.5035	0	23.5781	0.188544	-5.09644	-2.34949	0.164016	0.45622
hsa-miR-335-5p	23.5438	56.8881	15.7809	109.487	1.04947	266.837	3.93093	1.97487	0.166095	0.45794
hsa-miR-20b-5p	42.1063	71.7874	63.4729	9.51251	27.8459	6.45764	-4.04691	-2.01682	0.166234	0.45794
hsa-miR-338-5p	2.81962	0	0.058232	5.59559	0	14.2351	6.54837	2.71114	0.167164	0.458744
hsa-miR-378a-5p	3.80648	0	1.04818	5.54896	6.01696	14.9421	4.82835	2.27153	0.171069	0.466502
hsa-miR-10b-5p	144.693	1906.66	181.509	2673.16	351.223	3114.61	2.75019	1.45953	0.171938	0.466502
hsa-miR-182-5p	1054.4	809.527	655.867	156.63	408.314	315.859	-2.8613	-1.51667	0.171457	0.466502
hsa-miR-760	0.986865	57.7911	0.058232	1.81857	8.18587	0.0471361	-5.82687	-2.54272	0.174957	0.471138
hsa-miR-656-3p	6.01518	0.902986	11.2388	0	2.93852	0	-6.23566	-2.64054	0.174629	0.471138
hsa-miR-125b-2-3p	2.77262	0.902986	4.30917	0	1.1894	0	-6.90511	-2.78766	0.175756	0.471524
hsa-miR-17-5p	165.37	127.773	119.201	30.1696	11.3343	75.7948	-3.51429	-1.81323	0.181172	0.482725
hsa-miR-219a-5p	0.0469936	10.3843	0.524088	1.49216	0.0699647	0.0471361	-6.51918	-2.70469	0.181274	0.482725
hsa-miR-125a-5p	916.375	4926.24	772.157	5034.5	1575.18	9062.76	2.36962	1.24466	0.181953	0.482747
hsa-miR-212-5p	0.328955	0	0.058232	0.839339	1.25936	1.60263	6.07202	2.60218	0.184906	0.488777
hsa-miR-582-3p	0.610917	0	0	1.67868	0	3.20525	6.59876	2.72219	0.188249	0.490689
hsa-miR-96-5p	322.47	138.157	191.001	94.7521	31.0643	69.3843	-3.34163	-1.74055	0.187148	0.490689
hsa-miR-3200-5p	15.6019	0.451493	5.41558	0	0.0699647	3.86516	-5.46888	-2.45125	0.188359	0.490689
hsa-miR-769-5p	2.11471	1.35448	3.26099	0	1.1894	0	-5.81096	-2.53878	0.18789	0.490689
hsa-miR-7976	17.0117	0.902986	8.09425	1.30564	0	3.67661	-5.24094	-2.38982	0.189924	0.492981
hsa-miR-219a-1-3p	0.328955	28.8956	0.698784	0	4.40777	0	-6.74354	-2.75351	0.191946	0.496435
hsa-miR-550a-3p	15.0379	0	4.65856	0	0	3.29953	-5.97005	-2.57774	0.193574	0.498853
hsa-miR-1270	2.49066	0	1.16464	0.606189	0	0	-6.0983	-2.60841	0.199892	0.513294
hsa-miR-301a-5p	4.08844	0.451493	2.38751	18.5587	0.0699647	13.3866	4.47075	2.16052	0.204733	0.518322
hsa-miR-137-3p	31.9556	19.8657	49.7884	0.13989	25.5371	0.23568	-3.92722	-1.97351	0.20338	0.518322
hsa-miR-136-3p	5.21629	1.35448	11.6464	0.0466299	3.3583	0	-5.41028	-2.4357	0.204734	0.518322
hsa-miR-1224-3p	1.17484	0	0.29116	0.23315	0	0	-6.58959	-2.72019	0.203805	0.518322
hsa-miR-1227-3p	4.98132	30.7015	6.98784	1.8652	3.70813	3.95943	-4.34198	-2.11835	0.207251	0.522853
hsa-miR-548e-3p	6.25015	0	3.20276	0.37304	1.1894	0	-6.21897	-2.63668	0.210956	0.53034
hsa-miR-423-5p	159.026	985.61	228.386	183.862	101.309	180.013	-2.94851	-1.55999	0.211894	0.530843
hsa-miR-422a	0.610917	0.451493	0.29116	2.61128	0.209894	4.38366	5.20991	2.38126	0.222599	0.5538
hsa-miR-381-3p	100.66	6.3209	36.2203	0	32.1138	0.141408	-4.44408	-2.15189	0.221915	0.5538
hsa-miR-24-1-5p	3.24256	0.451493	1.22287	4.70962	0	19.1373	4.68946	2.22942	0.230477	0.571423
hsa-miR-15b-5p	874.786	609.967	715.555	137.465	461.767	248.454	-2.59664	-1.37664	0.23216	0.573619
hsa-miR-217-3p	6.86106	1.80597	12.3452	0	4.40777	0	-4.79976	-2.26296	0.235515	0.579915
hsa-miR-380-3p	5.54524	0.451493	3.95978	0	1.95901	0.0471361	-5.08791	-2.34707	0.236985	0.581544
hsa-miR-24-3p	7092.04	9117	6159.38	16834.6	2030.86	31871.7	2.26827	1.18159	0.239182	0.584938
hsa-miR-34c-5p	0.375949	6.3209	0.174696	10.5384	0.0699647	16.969	4.21451	2.07536	0.241665	0.587018
hsa-miR-324-5p	57.7551	6.3209	30.3389	6.29504	8.53569	17.3461	-2.95772	-1.56448	0.241064	0.587018
hsa-miR-4732-3p	243.709	264.575	251.155	50.1272	145.806	66.0848	-2.89933	-1.53572	0.245257	0.591744
hsa-miR-548k	21.899	8.57837	24.6322	2.23824	14.7625	2.12112	-2.91261	-1.54231	0.245023	0.591744
hsa-miR-532-3p	84.8704	2.25747	8.56011	1.16575	0.699647	25.6892	-3.47816	-1.79832	0.24661	0.593018
hsa-miR-548ay-5p	1.64478	0	2.85337	0	0.839576	0	-5.59248	-2.48349	0.247736	0.593741
hsa-miR-1910-5p	3.75949	0	1.80519	0	25.9569	0	4.56996	2.19218	0.254019	0.597924
hsa-miR-193a-3p	3.52452	0	3.0863	14.1755	0.0699647	13.3395	4.03023	2.01086	0.254471	0.597924
hsa-miR-126-3p	47562	143184	60426.5	310327	42583.7	211595	2.24749	1.16831	0.253227	0.597924
hsa-miR-423-3p	1028.55	1475.03	1339.74	2387.45	3305.41	2181.27	2.0499	1.03555	0.253286	0.597924
hsa-miR-1255b-5p	5.31028	3.61195	8.67657	1.07249	3.3583	0.0471361	-3.99365	-1.99771	0.254071	0.597924
hsa-miR-629-5p	4.13544	0.902986	2.85337	0	1.53922	0	-5.25428	-2.39349	0.252586	0.597924
hsa-miR-455-3p	70.1614	19.8657	78.1474	2.09835	597.218	0.329953	3.5628	1.83301	0.256155	0.599739
hsa-miR-140-5p	45.8657	12.6418	36.9191	140.822	13.5032	112.938	2.78624	1.47832	0.257746	0.599739
hsa-miR-183-5p	432.435	614.934	386.428	248.351	151.893	167.286	-2.52126	-1.33415	0.257546	0.599739
hsa-miR-574-3p	71.9472	13.5448	61.5513	47.1429	289.304	98.1373	2.9421	1.55685	0.260682	0.604614
hsa-miR-4695-3p	1.64478	0	0.640552	0	0.559717	0.0471361	-4.31296	-2.10868	0.270715	0.625866
hsa-miR-129-5p	0.939872	0	0.058232	0.23315	1.11943	4.5722	4.89611	2.29163	0.273214	0.629618
hsa-miR-500a-5p	6.20315	0.451493	4.25094	0	0	2.3568	-4.64935	-2.21703	0.274429	0.630398
hsa-miR-27b-5p	3.19556	1.80597	0.58232	7.7872	1.1894	10.9827	3.5418	1.82448	0.279767	0.636558
hsa-miR-29b-1-5p	3.24256	1.35448	3.61039	9.6524	14.5527	9.00299	3.45479	1.7886	0.279552	0.636558
hsa-miR-542-5p	11.9834	42.4404	10.0741	92.7936	20.4297	66.5562	2.83194	1.50179	0.278173	0.636558
hsa-miR-10395-3p	1.12785	0	0	0.839339	1.1894	4.47793	4.81991	2.26901	0.281824	0.637206
hsa-miR-330-3p	3.19556	2.25747	2.50398	8.99958	4.5477	12.4439	3.15343	1.65692	0.281504	0.637206
hsa-miR-6882-5p	0.0939872	0	0	0.839339	0	0	5.48162	2.4546	0.284157	0.638466
hsa-miR-503-5p	5.31028	0	7.04608	17.1132	5.03746	18.0531	3.1064	1.63524	0.284034	0.638466
hsa-miR-6756-3p	8.45885	3.16045	12.054	0	5.947	0.0471361	-3.97576	-1.99123	0.286449	0.641611
hsa-miR-181d-5p	26.4574	55.9852	26.612	111.259	19.0304	145.321	2.54109	1.34545	0.290159	0.647092
hsa-miR-625-5p	18.6095	42.8919	60.2702	2.14498	37.9908	0.141408	-3.02452	-1.59671	0.291596	0.647092
hsa-miR-329-3p	22.322	2.25747	17.1785	0	10.5647	0	-3.96464	-1.98719	0.290834	0.647092
hsa-miR-376b-5p	5.92119	0.902986	7.04608	0	3.3583	0	-4.17779	-2.06274	0.294207	0.650876
hsa-miR-382-3p	8.0829	0.902986	1.39757	0	2.51873	0	-4.18412	-2.06492	0.29812	0.657509
hsa-miR-181a-5p	1837.83	3425.03	2124.42	5729.7	1924.17	6186	1.87374	0.905918	0.299922	0.659462
hsa-miR-340-3p	18.1865	275.411	29.0578	536.757	38.6905	307.563	2.74173	1.45508	0.303293	0.66282
hsa-miR-627-5p	0.892878	0.451493	1.80519	0.792709	0	0	-4.01581	-2.00569	0.303128	0.66282
hsa-miR-1910-3p	0.422942	0	0	0	2.58869	0	4.9896	2.31892	0.308803	0.671467
hsa-miR-320b	8.69381	31.6045	9.89945	2.56465	10.0049	3.53521	-3.06208	-1.61451	0.309721	0.671467
hsa-miR-122-3p	0.0469936	6.7724	0.29116	0	1.53922	0.0471361	-4.32653	-2.11321	0.310052	0.671467
hsa-miR-223-5p	1.55079	1.80597	0.873481	0.652819	0.209894	0.23568	-3.36576	-1.75093	0.313006	0.675831
hsa-miR-34b-5p	0	0.902986	0.058232	4.05681	0	0	4.94606	2.30628	0.315431	0.676999
hsa-miR-1260a	197.702	639.766	300.943	396.774	951.1	1136.5	2.1848	1.1275	0.315287	0.676999
hsa-miR-197-3p	132.381	76.3024	101.79	3.07758	109.495	2.59248	-2.69741	-1.43157	0.316831	0.677981
hsa-miR-4440	0.187974	0	0	0	1.1894	0	4.42586	2.14596	0.319794	0.682291
hsa-let-7c-5p	573.181	12481.5	522.225	18007.4	888.062	10085.9	2.13468	1.09402	0.321936	0.683725
hsa-miR-376c-3p	148.265	37.9254	249.291	0	139.789	0.23568	-3.1108	-1.63729	0.322368	0.683725
hsa-let-7b-5p	11779.8	31111.5	12051.4	12945.1	5604.52	10406.1	-1.89741	-0.924033	0.32507	0.687428
hsa-miR-29a-3p	159.026	345.392	171.61	663.871	188.625	567.377	2.10378	1.07298	0.331685	0.697315
hsa-miR-3619-3p	1.40981	0	1.39757	0	0.769611	0	-3.92312	-1.972	0.33108	0.697315
hsa-miR-214-3p	112.832	8.12688	43.1499	0.0466299	54.0127	3.3938	-2.86003	-1.51603	0.333016	0.698072
hsa-miR-190b-5p	0.469936	0.902986	6.05613	10.5384	1.60919	12.0197	3.13674	1.64927	0.335693	0.699603
hsa-miR-34a-5p	3151.3	4696.43	2466.42	8028.23	2196.4	8301.47	1.79632	0.845045	0.335485	0.699603
hsa-miR-616-3p	0.65791	0	0	0	3.3583	0	4.41938	2.14384	0.349836	0.704571
hsa-miR-4731-5p	0.610917	0	0	0	3.07845	0	4.32116	2.11142	0.34743	0.704571
hsa-miR-6509-5p	0.469936	0	0	0	2.44876	0	4.30814	2.10706	0.348433	0.704571
hsa-miR-222-5p	14.991	4.06344	13.2187	32.7809	3.5682	49.6343	2.62855	1.39427	0.347869	0.704571
hsa-miR-151a-5p	1463.99	1445.68	1202.49	1968.53	3704.63	1890.44	1.83943	0.879263	0.349634	0.704571
hsa-miR-29c-3p	56.7213	159.829	67.4909	60.8521	9.65512	54.2536	-2.26959	-1.18243	0.349089	0.704571
hsa-miR-101-3p	29.559	6.7724	32.377	17.3463	1.53922	8.24882	-2.54696	-1.34878	0.343543	0.704571
hsa-miR-223-3p	29.136	23.0262	54.971	1.77194	30.8544	8.72018	-2.59964	-1.37831	0.349475	0.704571
hsa-miR-486-3p	71.8532	6.3209	16.1303	4.52311	24.6975	6.12769	-2.68365	-1.4242	0.344354	0.704571
hsa-miR-141-3p	0.892878	12.6418	0.349392	3.17084	0.279859	0.141408	-3.72387	-1.8968	0.344523	0.704571
hsa-miR-93-3p	3.33654	0.902986	3.43569	0.512929	1.60919	0	-3.76965	-1.91443	0.344985	0.704571
hsa-miR-3130-5p	4.55838	0	3.02807	0	1.81908	0	-4.25302	-2.08849	0.345533	0.704571
hsa-miR-539-5p	31.9556	1.35448	8.15249	0	12.8035	0.0471361	-3.23839	-1.69528	0.350963	0.704868
hsa-miR-28-3p	49.5782	53.7277	83.1554	94.1459	268.524	93.9422	2.44371	1.28907	0.354871	0.71073
hsa-miR-450b-5p	1.03386	0	0.989945	8.67317	0	0	4.05311	2.01903	0.358031	0.711738
hsa-miR-151a-3p	489.532	590.102	97.364	607.215	92.3534	1819.97	2.1411	1.09835	0.359784	0.711738
hsa-miR-181b-5p	388.214	693.945	445.417	1123.55	398.659	1583.49	2.0342	1.02446	0.360324	0.711738
hsa-miR-30d-3p	2.86661	34.3135	4.83326	11.0513	0.139929	2.30967	-3.07522	-1.62069	0.359866	0.711738
hsa-miR-18b-5p	11.3255	0.902986	9.78298	2.42476	4.68763	0	-3.12921	-1.6458	0.358716	0.711738
hsa-miR-665	3.47753	0	0.698784	0	1.11943	0	-3.88013	-1.95611	0.36423	0.717484
hsa-miR-378a-3p	106.534	223.941	131.604	422.094	186.596	352.201	2.08735	1.06167	0.365695	0.718401
hsa-miR-23b-3p	150.239	470.456	277.185	747.198	363.466	739.424	2.06399	1.04544	0.36719	0.719372
hsa-miR-18a-3p	28.8541	1.35448	7.4537	1.72531	3.42827	8.81445	-2.72876	-1.44825	0.368494	0.719965
hsa-miR-582-5p	5.59224	29.3471	12.054	76.0068	7.48622	31.864	2.48716	1.3145	0.37129	0.721171
hsa-miR-4659a-3p	16.5887	0	7.51193	0.559559	6.99647	0	-3.21124	-1.68313	0.37212	0.721171
hsa-miR-7705	1.50379	0.451493	3.02807	0	1.46926	0	-3.51435	-1.81326	0.37047	0.721171
hsa-miR-30a-5p	503.442	1077.71	178.598	1275.19	40.8594	2303.4	2.05716	1.04066	0.377295	0.729235
hsa-let-7i-3p	31.1567	64.112	17.1785	13.7092	5.87703	27.4803	-2.36756	-1.2434	0.378719	0.730024
hsa-miR-485-5p	53.9486	12.6418	79.6614	0.0466299	412.862	0.565633	2.82472	1.49811	0.380474	0.731445
hsa-miR-5187-5p	0	0	0.29116	0	1.53922	0	4.12206	2.04337	0.389701	0.733623
hsa-miR-6819-3p	0.328955	0.451493	0.232928	0	3.42827	0.0471361	3.47069	1.79522	0.386751	0.733623
hsa-miR-153-3p	0.939872	0	0.174696	0.466299	0	3.77089	3.31263	1.72798	0.386635	0.733623
hsa-miR-132-5p	20.5362	3.61195	13.2769	18.2789	61.6389	12.9153	2.43497	1.28391	0.387928	0.733623
hsa-miR-92a-3p	15715.5	24906.6	23492	5198.49	21987.1	9080.44	-1.76788	-0.82202	0.385907	0.733623
hsa-miR-629-3p	3.57151	30.25	2.9116	0.0466299	10.1449	2.78103	-2.80561	-1.48831	0.388982	0.733623
hsa-miR-3688-3p	7.42499	1.35448	3.66862	0.699449	0.979505	2.92244	-2.83182	-1.50173	0.389769	0.733623
hsa-miR-1229-3p	1.08085	0.451493	1.4558	0	0.979505	0	-3.23391	-1.69328	0.382642	0.733623
hsa-miR-30e-3p	148.735	153.056	189.953	81.1361	91.094	71.9297	-2.0243	-1.01742	0.394094	0.733937
hsa-miR-421	27.2093	2.70896	15.4315	3.03095	5.17739	11.5012	-2.33539	-1.22366	0.394289	0.733937
hsa-miR-5581-3p	7.84793	29.7986	9.37536	1.3989	15.3922	1.36695	-2.56988	-1.3617	0.39504	0.733937
hsa-miR-98-3p	3.28955	33.862	2.09635	9.04621	1.25936	3.86516	-2.71614	-1.44156	0.394807	0.733937
hsa-miR-487b-5p	4.08844	0	2.15459	0	1.74912	0	-3.65757	-1.87088	0.392274	0.733937
hsa-miR-1914-5p	0.281962	0	0	0	1.46926	0	3.94634	1.98051	0.404547	0.745819
hsa-miR-3065-5p	0.281962	0	0	0	1.32933	0.0471361	3.5872	1.84286	0.404017	0.745819
hsa-miR-378i	1.78576	114.679	3.61039	27.5117	0.979505	19.1373	-2.51129	-1.32843	0.403523	0.745819
hsa-miR-7704	0.234968	0	1.16464	0.27978	4.5477	0	3.09874	1.63168	0.408152	0.746722
hsa-miR-744-5p	25.0006	32.056	26.4373	73.8152	26.6565	72.3068	2.08362	1.05909	0.406497	0.746722
hsa-miR-1185-5p	14.333	2.25747	17.0038	0	11.6841	0.0471361	-2.87677	-1.52445	0.407716	0.746722
hsa-miR-10527-5p	1.50379	1.35448	6.75492	0	3.00848	0	-3.23705	-1.69468	0.412475	0.752714
hsa-miR-4454	9.06976	27.9926	8.38541	3.68377	27.776	74.1922	2.34897	1.23203	0.419676	0.757865
hsa-miR-339-3p	14.756	2.25747	8.9095	27.6982	3.07845	29.9314	2.29776	1.20023	0.423426	0.757865
hsa-miR-505-5p	2.9606	4.96643	13.4516	11.9839	29.0353	6.17483	2.1758	1.12155	0.423142	0.757865
hsa-miR-24-2-5p	64.5222	138.157	24.0498	164.977	11.1943	315.199	2.17096	1.11833	0.42373	0.757865
hsa-miR-450a-5p	16.5417	60.0486	7.91956	88.1772	6.71661	86.9661	2.16696	1.11567	0.418748	0.757865
hsa-miR-11401	0.751897	0	0.407624	0.37304	0.0699647	0	-3.11357	-1.63857	0.421269	0.757865
hsa-miR-619-5p	0	41.0859	0.58232	0	12.8035	0	-3.244	-1.69777	0.422772	0.757865
hsa-miR-5695	0.798891	0	0.757017	0.512929	0	0	-3.26215	-1.70582	0.420536	0.757865
hsa-miR-6894-3p	2.72563	0.902986	2.32928	1.07249	1.1894	0	-2.74997	-1.45942	0.427583	0.76286
hsa-miR-23a-5p	0	0.902986	2.09635	1.49216	4.33781	2.59248	2.76205	1.46574	0.428775	0.763092
hsa-miR-125b-5p	6968.44	9782.5	2097.69	6433.21	2630.18	22960	1.69902	0.764699	0.430879	0.764943
hsa-miR-221-5p	2.34968	0.451493	1.39757	0.512929	6.64664	4.43079	2.5287	1.3384	0.434422	0.767444
hsa-miR-1287-5p	3.14857	2.70896	8.38541	0.652819	4.68763	0	-2.699	-1.43243	0.433841	0.767444
hsa-miR-3934-5p	0.375949	0	0	0	1.60919	0	3.40311	1.76686	0.440637	0.774102
hsa-miR-139-3p	17.2466	119.194	23.0599	134.947	35.682	152.58	2.03847	1.02749	0.441421	0.774102
hsa-miR-125b-1-3p	43.4691	136.351	53.9229	168.334	158.61	139.711	2.01622	1.01165	0.441263	0.774102
hsa-miR-652-3p	1134.61	1983.41	1415.39	2895.63	712.03	3900.42	1.65636	0.728018	0.444161	0.776785
hsa-miR-23a-3p	1324.33	4759.64	2234.01	4373.14	4272.81	4534.07	1.58492	0.664412	0.445853	0.776785
hsa-miR-143-3p	2.63164	9.02986	2.32928	2.65791	2.09894	0.612769	-2.41044	-1.2693	0.447083	0.776785
hsa-miR-2116-5p	0.892878	0	0.58232	0	0.559717	0	-3.0491	-1.60839	0.447272	0.776785
hsa-miR-1234-3p	0.516929	0	0	0	0	1.93258	3.15496	1.65762	0.449822	0.776805
hsa-miR-615-3p	3.6655	2.25747	1.97989	0	20.2898	0.0471361	2.55532	1.3535	0.453991	0.776805
hsa-miR-1261	2.9136	1.35448	1.92166	7.69394	0	8.20168	2.52174	1.33442	0.45543	0.776805
hsa-miR-29a-5p	1.50379	1.35448	2.96983	9.1861	2.09894	3.06385	2.35364	1.23489	0.450876	0.776805
hsa-let-7f-1-3p	72.8871	86.2352	82.573	246.299	55.6919	179.4	1.99324	0.995115	0.45117	0.776805
hsa-miR-154-5p	43.704	8.57837	50.4289	0	42.6085	0.188544	-2.40311	-1.2649	0.455527	0.776805
hsa-miR-548at-5p	1.36281	0.451493	1.2811	0.559559	0.769611	0	-2.56353	-1.35813	0.457008	0.776805
hsa-miR-487a-3p	12.8762	0.451493	5.64851	0	6.99647	0.0471361	-2.71839	-1.44275	0.455826	0.776805
hsa-miR-148b-5p	0.939872	0	1.97989	1.02586	0	0	-2.93951	-1.55558	0.456402	0.776805
hsa-miR-199a-3p	458.704	126.418	414.903	7.74057	468.483	6.7876	-2.07086	-1.05023	0.459053	0.778442
hsa-miR-766-5p	0.328955	0	0	0	1.39929	0	3.30233	1.72348	0.462001	0.780086
hsa-miR-652-5p	1.36281	0	0	2.7978	0	1.46122	2.83148	1.50156	0.464363	0.780086
hsa-miR-4510	3.80648	32.959	2.27105	44.6715	2.44876	33.9851	2.10773	1.07569	0.463485	0.780086
hsa-miR-4755-5p	0.751897	0.451493	0.757017	0.512929	0.349823	0	-2.47301	-1.30627	0.462736	0.780086
hsa-miR-191-5p	4006.06	4941.59	3776.81	1423.61	3994.28	2822.41	-1.54411	-0.626774	0.465981	0.780981
hsa-miR-149-5p	252.591	38.3769	223.145	23.1751	924.373	16.4034	1.87407	0.906173	0.470126	0.782456
hsa-miR-26a-5p	4083.84	7426.16	5511.9	4656.89	2650.68	3849.65	-1.52542	-0.609209	0.469211	0.782456
hsa-miR-887-3p	5.1223	1.80597	5.00796	0	4.47774	0	-2.69287	-1.42915	0.468553	0.782456
hsa-miR-33a-5p	6.86106	33.4105	4.89149	59.5931	4.05795	30.0728	2.10436	1.07338	0.472697	0.784918
hsa-miR-4725-3p	0.140981	0	1.2811	0	4.40777	0	2.86258	1.51732	0.473811	0.784953
hsa-miR-128-3p	53.9016	121	100.741	38.0967	55.2721	53.8765	-1.85998	-0.895287	0.47706	0.78852
hsa-miR-134-3p	0.65791	0	1.16464	0	5.947	0	3.05194	1.60973	0.481627	0.790616
hsa-miR-671-3p	2.49066	31.153	0.058232	1.58542	3.07845	9.38008	-2.36905	-1.24431	0.481146	0.790616
hsa-miR-550a-5p	5.54524	2.70896	5.8232	0	5.59717	0	-2.53285	-1.34076	0.480582	0.790616
hsa-miR-1226-3p	5.59224	0.451493	6.28906	0	29.5951	0.0471361	2.37688	1.24907	0.48605	0.793696
hsa-miR-320a-3p	641.322	437.045	789.743	188.338	725.883	152.721	-1.75145	-0.808552	0.486008	0.793696
hsa-miR-1237-3p	1.50379	0	0	0	0.559717	0	-2.90907	-1.54056	0.486815	0.793696
hsa-miR-424-5p	58.977	1076.36	56.3104	1448.61	44.4975	757.006	1.88898	0.917611	0.488365	0.794422
hsa-let-7i-5p	12318.3	21243.7	11792.7	12007.1	4408.96	12813.3	-1.55164	-0.633792	0.491577	0.797841
hsa-miR-378h	0.187974	0.451493	0.116464	0.512929	0.209894	0.518497	2.439	1.28629	0.494846	0.798356
hsa-miR-181a-3p	42.2472	14.4478	67.0251	77.0793	66.3965	84.0436	1.81672	0.861339	0.495225	0.798356
hsa-miR-889-5p	3.52452	1.35448	6.69668	0	4.47774	0	-2.61429	-1.38642	0.49338	0.798356
hsa-miR-1306-5p	22.3689	8.57837	23.7587	25.46	16.2318	67.7817	1.97379	0.980967	0.497671	0.800504
hsa-miR-10399-3p	9.35172	4.96643	4.83326	1.49216	6.78657	0	-2.3276	-1.21885	0.499634	0.801546
hsa-miR-940	4.13544	0	2.79514	0	2.51873	0	-2.8085	-1.4898	0.500548	0.801546
hsa-miR-1255a	0.375949	0	0	0	1.39929	0	2.95155	1.56147	0.508309	0.809033
hsa-miR-30a-3p	238.633	570.687	226.581	777.601	320.438	662.073	1.70182	0.767076	0.507932	0.809033
hsa-miR-362-5p	7.70695	1.80597	15.2568	0.699449	6.99647	4.33652	-2.10349	-1.07279	0.508599	0.809033
hsa-miR-4448	6.53211	1.80597	5.9979	4.01018	2.30883	24.605	2.10138	1.07134	0.512358	0.809106
hsa-miR-877-5p	8.31787	60.9516	9.55005	20.0509	4.5477	15.4135	-1.94516	-0.959885	0.512979	0.809106
hsa-miR-17-3p	19.9723	2.70896	8.67657	4.80288	1.67915	8.86158	-2.08072	-1.05708	0.513146	0.809106
hsa-miR-1292-5p	0.751897	0	2.15459	0	1.1894	0.0942722	-2.45316	-1.29464	0.509801	0.809106
hsa-miR-3200-3p	3.75949	0.902986	1.10641	0.41967	2.02898	0	-2.44803	-1.29162	0.518511	0.815776
hsa-miR-323b-5p	0.234968	0	0.815249	0	3.14841	0	2.68284	1.42376	0.520662	0.817371
hsa-miR-365a-3p	203.67	568.881	66.8504	304.121	166.796	941.59	1.68421	0.752072	0.525217	0.822448
hsa-miR-758-3p	9.58669	0.902986	5.24088	0.0466299	6.85654	0	-2.30316	-1.20362	0.526184	0.822448
hsa-miR-410-3p	33.5064	11.2873	53.2823	0	46.5265	0.141408	-2.10411	-1.07321	0.527749	0.823105
hsa-miR-1260b	24.4367	99.78	32.6682	55.2099	71.224	146.923	1.75716	0.813244	0.531366	0.824158
hsa-miR-25-5p	2.30269	44.6978	5.41558	8.67317	4.33781	13.7637	-1.92612	-0.945701	0.531863	0.824158
hsa-miR-6780b-3p	0.610917	0.451493	1.04818	0	0.979505	0	-2.28362	-1.19132	0.531052	0.824158
hsa-miR-1301-3p	4.18243	0.902986	3.49392	0	19.3802	0	2.2304	1.1573	0.539014	0.826334
hsa-miR-130a-3p	91.9195	94.3621	86.8822	78.0119	18.4707	408.764	1.8497	0.887295	0.538645	0.826334
hsa-let-7d-3p	183.839	518.766	137.486	589.403	157.7	606.217	1.61298	0.689728	0.538729	0.826334
hsa-miR-100-5p	4423.32	1407.76	6399.7	628.105	17869	806.546	1.57825	0.658328	0.536384	0.826334
hsa-miR-4646-3p	1.69177	0	2.15459	0.27978	0	1.41408	-2.38789	-1.25574	0.537116	0.826334
hsa-miR-30b-5p	415.893	382.415	132.42	113.218	12.6636	396.462	-1.78153	-0.833116	0.541693	0.828675
hsa-miR-103a-1-5p	0.281962	0	0	0.27978	0	0.612769	2.28002	1.18905	0.544651	0.8312
hsa-miR-1271-5p	12.0304	0	7.33724	0	8.46573	0.0942722	-2.27954	-1.18874	0.545656	0.8312
hsa-miR-6810-3p	0.65791	0	0.524088	0.32641	0	2.8753	2.3546	1.23548	0.548905	0.831364
hsa-miR-203a-3p	0.281962	0.902986	0.58232	0	3.98799	0.0471361	2.35357	1.23485	0.549232	0.831364
hsa-miR-4286	6.39113	0	0.407624	0.979229	0.489753	14.0466	2.21099	1.14469	0.549029	0.831364
hsa-miR-23c	0.140981	0.451493	0.524088	0.932599	0.279859	0.895586	2.12555	1.08784	0.555947	0.836885
hsa-miR-18a-5p	19.9253	4.06344	20.6724	11.3777	0.559717	13.1038	-1.7965	-0.845192	0.556207	0.836885
hsa-miR-135a-5p	0.422942	0.451493	1.22287	0.979229	0	0	-2.1737	-1.12015	0.556371	0.836885
hsa-miR-625-3p	8.92878	10.3843	8.67657	0.32641	13.3633	0.0471361	-2.03963	-1.0283	0.559068	0.837437
hsa-miR-4804-5p	1.26883	0.451493	2.27105	0.606189	1.32933	0	-2.2063	-1.14163	0.558729	0.837437
hsa-miR-378d	0.563923	0.451493	0.058232	0.466299	0.349823	1.31981	2.09385	1.06616	0.564802	0.844268
hsa-miR-330-5p	4.13544	32.5075	4.94972	34.9258	2.23887	36.719	1.80199	0.849588	0.570706	0.847951
hsa-miR-6803-3p	6.90806	0.451493	5.70674	0.839339	2.79859	3.58234	-1.90949	-0.933186	0.570804	0.847951
hsa-miR-651-5p	2.16171	1.80597	4.01801	0	1.81908	1.97972	-2.13931	-1.09714	0.568782	0.847951
hsa-miR-342-5p	3.33654	2.25747	6.05613	7.74057	6.78657	9.47435	1.86502	0.899188	0.573561	0.850238
hsa-miR-4685-3p	18.1395	4.96643	18.2266	5.78211	11.4042	8.4845	-1.67276	-0.742233	0.574709	0.850238
hsa-miR-431-3p	0.704904	0	1.10641	0	4.40777	0	2.26909	1.18212	0.577287	0.852298
hsa-miR-375-3p	1.69177	0.451493	0	0.559559	4.26784	0	2.16328	1.11322	0.593038	0.857677
hsa-miR-3135b	3.28955	0	0.873481	0	9.23534	0.0471361	2.1541	1.10709	0.58856	0.857677
hsa-miR-28-5p	30.8748	58.2426	28.0678	78.758	17.1413	92.1982	1.61512	0.691639	0.59587	0.857677
hsa-miR-766-3p	23.6848	3.61195	14.9656	0.32641	23.718	0.141408	-1.75602	-0.812305	0.591691	0.857677
hsa-miR-132-3p	5.82721	0.451493	6.87138	2.37813	4.82756	0.188544	-1.83361	-0.874689	0.596438	0.857677
hsa-miR-889-3p	54.1836	8.57837	55.4951	0.0932599	63.2481	0.0942722	-1.8666	-0.900417	0.587136	0.857677
hsa-miR-654-3p	110.341	22.1232	119.201	0.0466299	132.373	0.0942722	-1.9001	-0.926078	0.585307	0.857677
hsa-miR-543	23.3088	4.96643	25.3892	0	28.0558	0	-1.91654	-0.938506	0.595487	0.857677
hsa-miR-6802-3p	1.22183	0.451493	0.349392	0	1.04947	0	-2.03576	-1.02557	0.585941	0.857677
hsa-miR-409-5p	10.8555	0.451493	1.10641	0	5.87703	0	-2.1351	-1.0943	0.588779	0.857677
hsa-miR-129-2-3p	0.563923	0	0.757017	0	0.699647	0	-2.17137	-1.11861	0.58747	0.857677
hsa-miR-5690	2.2087	0	3.20276	0.979229	0	1.60263	-2.17759	-1.12273	0.59452	0.857677
hsa-miR-3157-5p	2.16171	0	5.41558	0	3.49823	0	-2.20335	-1.1397	0.596098	0.857677
hsa-miR-433-5p	0	0	0.465856	0	1.25936	0	2.24621	1.16749	0.60123	0.858442
hsa-miR-3682-3p	0.563923	0	0.058232	0	1.60919	0	2.16628	1.11522	0.601745	0.858442
hsa-miR-27b-3p	472.333	1163.5	538.821	1634.89	410.343	1221.01	1.50271	0.58757	0.600176	0.858442
hsa-miR-455-5p	12.1243	3.16045	13.6845	5.03603	10.7046	0.0471361	-1.85109	-0.888372	0.601298	0.858442
hsa-miR-196a-5p	2.34968	5.86941	4.30917	2.09835	4.05795	0.424225	-1.85943	-0.894863	0.603342	0.859015
hsa-miR-21-5p	39525.2	80416.8	53131.7	142427	41418	61016.6	1.41479	0.50059	0.611059	0.862621
hsa-miR-379-5p	639.677	103.392	696.164	0.32641	829.081	0.989858	-1.73335	-0.793562	0.611373	0.862621
hsa-miR-206	0.375949	51.0187	1.68873	16.1806	1.46926	11.8312	-1.78507	-0.835978	0.612157	0.862621
hsa-miR-6777-3p	10.6206	0	1.97989	1.49216	0.699647	4.94929	-1.80876	-0.854998	0.613072	0.862621
hsa-miR-6747-3p	1.08085	0.451493	2.9116	0.32641	0.909541	1.46122	-1.83617	-0.876701	0.612927	0.862621
hsa-let-7g-3p	3.57151	0.902986	1.16464	2.65791	0.139929	0	-2.05021	-1.03577	0.610314	0.862621
hsa-miR-376a-3p	202.871	58.6941	310.901	0.18652	317.5	0.282817	-1.80078	-0.848622	0.614289	0.862644
hsa-miR-6772-3p	0	0	0.524088	0	1.39929	0	2.25515	1.17322	0.617069	0.863372
hsa-miR-337-3p	896.967	159.377	644.862	0.27978	1000.35	2.96957	-1.69523	-0.761482	0.617209	0.863372
hsa-miR-548j-5p	1.17484	0	1.6305	0.13989	1.39929	0	-1.98569	-0.989638	0.618748	0.863844
hsa-miR-495-5p	9.68068	2.25747	9.78298	0	11.4042	0.0471361	-1.90924	-0.932995	0.620399	0.86447
hsa-miR-9901	0.140981	0	0.989945	0	2.58869	0	2.06446	1.04576	0.623075	0.866521
hsa-miR-6789-3p	0.469936	0	0	0	1.25936	0	2.19268	1.1327	0.628632	0.867306
hsa-miR-6766-3p	0.892878	0	1.2811	0	4.82756	0	2.09367	1.06603	0.628912	0.867306
hsa-miR-9985	3.05458	2.70896	2.96983	9.32599	2.72862	3.15812	1.72435	0.786054	0.627811	0.867306
hsa-miR-30c-5p	712.705	983.352	324.644	588.983	155.881	2254.57	1.48458	0.570058	0.626712	0.867306
hsa-miR-369-5p	1913.02	342.683	1747.37	1.53879	2479.97	5.98628	-1.60934	-0.686465	0.629672	0.867306
hsa-miR-379-3p	49.2023	9.02986	74.8282	0.23315	229.134	0.141408	1.72303	0.784952	0.632139	0.869041
hsa-miR-26b-3p	17.9985	29.3471	2.85337	4.33659	0	25.5478	-1.67451	-0.743735	0.633894	0.869789
hsa-miR-6734-5p	0	0	1.04818	0.41967	1.88905	0	1.95535	0.967423	0.636778	0.871025
hsa-miR-31-5p	1385.47	1101.19	936.488	1943.96	530.262	2207.67	1.36769	0.451746	0.638429	0.871025
hsa-miR-411-5p	2126.55	378.803	2081.62	2.37813	2914.31	4.61934	-1.57023	-0.650976	0.638352	0.871025
hsa-miR-4488	0	0	0.815249	0	1.81908	0	1.98471	0.988928	0.644593	0.87117
hsa-miR-100-3p	2.25569	0.902986	1.92166	9.79229	0	0	1.89806	0.924527	0.643871	0.87117
hsa-miR-323a-5p	1.73876	3.16045	5.47381	0	19.1703	0	1.8408	0.880331	0.642952	0.87117
hsa-miR-183-3p	1.40981	0	2.62044	0.27978	4.12792	3.48807	1.78268	0.834049	0.639827	0.87117
hsa-miR-3605-5p	1.87974	1.80597	5.18265	0	4.68763	0	-1.91138	-0.934614	0.641832	0.87117
hsa-miR-25-3p	1404.59	1145.44	1696.71	359.983	2354.17	349.043	-1.38647	-0.471416	0.650412	0.877385
hsa-miR-4717-3p	0.469936	0	0	0	1.11943	0	1.94469	0.959539	0.653781	0.880278
hsa-miR-493-5p	9.91565	2.70896	10.3653	0	39.2502	0.0471361	1.70088	0.766279	0.656136	0.881798
hsa-miR-382-5p	201.884	42.8919	233.685	0.0466299	279.789	0.282817	-1.70851	-0.772735	0.657821	0.882412
hsa-miR-3150a-5p	0.516929	0	0	0	1.25936	0	2.0202	1.0145	0.662853	0.885858
hsa-miR-501-3p	8.17688	1.35448	2.96983	7.18101	1.88905	11.9726	1.61517	0.691684	0.66222	0.885858
hsa-miR-493-3p	13.2052	3.61195	16.0138	0	19.2403	0	-1.71191	-0.775608	0.669766	0.890133
hsa-miR-664b-3p	1.36281	0.451493	2.44575	0.699449	1.88905	0	-1.74373	-0.802173	0.668694	0.890133
hsa-miR-1262	1.12785	0.451493	2.03812	0	2.02898	0	-1.85253	-0.889494	0.668658	0.890133
hsa-miR-29c-5p	43.704	35.2165	16.9455	59.6863	11.5442	70.0914	1.47608	0.561768	0.676595	0.897252
hsa-miR-148b-3p	12.0304	5.41792	13.2187	11.9373	3.14841	5.18497	-1.548	-0.630404	0.677619	0.897252
hsa-miR-95-3p	0	0	0.757017	0	1.60919	0	1.87473	0.90668	0.679097	0.897556
hsa-miR-128-1-5p	0.516929	0.451493	0.116464	0.559559	0	1.1784	1.6727	0.742182	0.681197	0.89868
hsa-miR-98-5p	1011.68	1908.91	997.457	1588.78	432.871	916.797	-1.33299	-0.414666	0.684715	0.901667
hsa-miR-3064-3p	1.12785	0	0.232928	0.792709	0	1.93258	1.74517	0.80337	0.692928	0.902847
hsa-miR-30c-2-3p	2.72563	33.862	2.50398	30.2628	2.1689	24.8879	1.48877	0.574126	0.696913	0.902847
hsa-miR-5010-3p	13.4402	1.35448	11.4717	2.3315	32.3237	4.99643	1.48532	0.570779	0.695233	0.902847
hsa-miR-22-3p	7153.6	12623.8	6636.59	15806.2	3223.69	14951.2	1.28652	0.363474	0.696428	0.902847
hsa-miR-140-3p	42.0123	4.06344	22.9434	11.3311	3.70813	31.534	-1.49221	-0.577447	0.692681	0.902847
hsa-miR-3605-3p	16.8707	3.61195	11.9958	0.839339	17.7011	3.3938	-1.49945	-0.584437	0.696022	0.902847
hsa-miR-499a-5p	4.88733	4.51493	4.77503	7.08775	1.74912	0.0942722	-1.58834	-0.66752	0.694871	0.902847
hsa-miR-502-3p	10.9025	0.902986	6.98784	7.04112	0	4.43079	-1.65493	-0.726771	0.6883	0.902847
hsa-miR-130a-5p	1.69177	0.451493	0	1.21238	0	0	-1.79722	-0.845769	0.694987	0.902847
hsa-miR-150-3p	0	2.70896	0	1.35227	0	0	-1.87048	-0.903405	0.700775	0.906218
hsa-miR-103a-3p	431.354	259.609	502.135	148.703	184.707	573.363	-1.31642	-0.396615	0.708343	0.907841
hsa-miR-935	76.8815	15.3508	75.1193	0.885969	104.877	9.6629	-1.45219	-0.538227	0.7038	0.907841
hsa-miR-21-3p	10.1036	4.06344	13.5098	7.69394	8.81555	3.15812	-1.46581	-0.551698	0.707502	0.907841
hsa-miR-494-5p	16.4008	0.902986	10.2488	0	16.8615	0	-1.64158	-0.715082	0.708206	0.907841
hsa-miR-6513-3p	1.92674	0.451493	0.931713	1.02586	1.11943	0	-1.65324	-0.725294	0.70685	0.907841
hsa-miR-2116-3p	1.78576	0.902986	1.80519	0	7.55618	0	1.64988	0.722363	0.714253	0.911558
hsa-miR-636	2.30269	0.451493	3.31923	0.699449	3.07845	0	-1.67322	-0.742627	0.715047	0.911558
hsa-miR-454-5p	3.19556	0	4.19271	0	4.40777	0	-1.70594	-0.770567	0.713518	0.911558
hsa-miR-4791	0.0939872	0	0.58232	1.35227	0	0	1.73091	0.791529	0.717968	0.913141
hsa-miR-146b-5p	28.995	3.61195	4.3674	8.06698	0.139929	16.9219	-1.47944	-0.56505	0.718829	0.913141
hsa-miR-29b-2-5p	2.67863	0.451493	3.43569	2.00509	1.88905	1.74404	-1.52956	-0.613117	0.720459	0.913598
hsa-miR-4435	2.2087	0	0.931713	0	5.66714	0	1.73165	0.79215	0.725314	0.916735
hsa-miR-4647	0.704904	0.451493	0.058232	0.0466299	1.95901	0	1.61805	0.694255	0.727585	0.916735
hsa-miR-324-3p	3.38354	0	2.27105	4.89614	0	4.47793	1.60049	0.67851	0.730516	0.916735
hsa-miR-126-5p	700.345	1617.25	932.062	953.396	99.3498	1408.1	-1.32037	-0.400939	0.730583	0.916735
hsa-miR-26a-2-3p	0.140981	0.451493	0.873481	0.885969	0	0	-1.64647	-0.719372	0.72989	0.916735
hsa-miR-376c-5p	1.87974	0.451493	1.33934	0	2.30883	0	-1.65078	-0.723149	0.727186	0.916735
hsa-miR-224-5p	194.553	213.105	267.926	118.673	619.327	148.714	1.31221	0.391996	0.734625	0.917006
hsa-miR-496	37.8298	9.93285	48.3908	0.0466299	64.1576	0.141408	-1.49646	-0.581557	0.734413	0.917006
hsa-miR-6749-3p	3.99446	0	2.85337	0.792709	0.0699647	3.62948	-1.58003	-0.659951	0.733798	0.917006
hsa-miR-4429	0.751897	0	0.640552	0	0.979505	0	-1.60206	-0.679924	0.736072	0.917219
hsa-miR-29b-3p	186.518	217.62	107.846	230.585	37.2212	109.733	-1.35491	-0.4382	0.737666	0.917615
hsa-miR-4484	0.469936	0	0.058232	0	1.04947	0	1.60911	0.686266	0.739719	0.918581
hsa-miR-941	76.4116	56.8881	88.7456	9.1861	287.765	8.6259	1.37537	0.459822	0.741968	0.919784
hsa-miR-432-5p	168.331	35.2165	132.944	0	492.831	0.754177	1.46639	0.552272	0.748474	0.923922
hsa-miR-340-5p	20.0663	51.4702	11.4135	60.8987	0.209894	55.5734	1.41072	0.496427	0.750672	0.923922
hsa-miR-92b-3p	375.667	286.698	389.689	62.5774	1221.72	96.3462	1.31214	0.391926	0.749768	0.923922
hsa-miR-1180-3p	201.931	362.098	271.536	41.6872	523.126	65.0478	-1.32641	-0.407522	0.749521	0.923922
hsa-miR-4645-3p	1.12785	0	0	0	0.769611	0	-1.62429	-0.699806	0.751731	0.923922
hsa-let-7d-5p	4443.67	6399.46	5498.68	6457.5	2545.87	4573.57	-1.20357	-0.267318	0.753693	0.924754
hsa-miR-5701	1.36281	0	1.51403	0	4.82756	0	1.60325	0.680999	0.761857	0.925952
hsa-miR-491-5p	1.69177	0	0.058232	0	2.93852	0.0471361	1.57428	0.654694	0.763834	0.925952
hsa-miR-146a-5p	187.692	578.363	146.162	511.997	274.681	363.891	1.2636	0.337543	0.766261	0.925952
hsa-miR-2110	28.6661	38.8284	32.0859	8.67317	56.1117	9.19154	-1.34531	-0.427937	0.765125	0.925952
hsa-miR-584-5p	37.5949	6.3209	32.2606	0.18652	44.2876	10.8413	-1.38185	-0.466603	0.759253	0.925952
hsa-miR-1468-5p	4.69936	1.35448	3.90155	0.979229	5.947	0.23568	-1.43814	-0.524204	0.757281	0.925952
hsa-miR-212-3p	5.02831	2.25747	2.56221	1.25901	5.45724	0.0471361	-1.48218	-0.567722	0.756375	0.925952
hsa-miR-214-5p	6.72008	0.902986	7.27901	0	10.0049	0.0471361	-1.49807	-0.583109	0.7612	0.925952
hsa-miR-1233-3p	0.516929	0.451493	0.29116	0	0.839576	0	-1.5484	-0.630775	0.762782	0.925952
hsa-miR-3187-3p	3.47753	0.902986	1.97989	0.885969	3.49823	0	-1.49936	-0.584349	0.767778	0.926229
hsa-miR-3173-5p	7.47198	1.80597	5.88144	0.932599	8.39576	1.88544	-1.39925	-0.484658	0.771023	0.926335
hsa-miR-433-3p	22.4159	1.35448	16.305	0	28.2657	0.0942722	-1.41832	-0.504179	0.769695	0.926335
hsa-miR-942-3p	5.16929	0.451493	3.0863	0.792709	5.38728	0.0471361	-1.44432	-0.530392	0.772924	0.926335
hsa-miR-12135	4.18243	0.451493	5.00796	0	6.50671	0	-1.5033	-0.588133	0.773019	0.926335
hsa-miR-22-5p	19.8313	10.3843	25.7968	27.978	13.783	34.4093	1.33131	0.412842	0.777075	0.929645
hsa-miR-188-5p	1.40981	0	0.116464	2.47139	0	0	1.50538	0.590126	0.784608	0.935324
hsa-miR-654-5p	57.6141	5.86941	59.8625	0	168.965	0.329953	1.37109	0.45532	0.785724	0.935324
hsa-miR-1293	0.328955	0	0.873481	0	0.909541	0	-1.50403	-0.588829	0.784606	0.935324
hsa-miR-6734-3p	1.12785	0	0	0	0	1.83831	1.4971	0.582167	0.791954	0.938081
hsa-miR-361-5p	43.1401	7.22389	22.7687	19.1183	15.1124	62.4082	1.30924	0.388728	0.791531	0.938081
hsa-miR-155-5p	383.938	222.135	767.032	284.396	1137.07	280.318	1.23877	0.308908	0.790615	0.938081
hsa-miR-424-3p	7.28401	0.902986	10.9476	0.37304	25.4671	0.141408	1.34337	0.425861	0.798947	0.940168
hsa-miR-152-3p	112.315	9.02986	19.9736	14.1755	17.7011	77.9631	-1.29049	-0.367921	0.795812	0.940168
hsa-miR-628-3p	9.30473	1.35448	15.6062	0.41967	18.5406	0	-1.3942	-0.479435	0.797238	0.940168
hsa-miR-374b-3p	1.36281	0	0.349392	1.25901	0	0	-1.45579	-0.541806	0.798699	0.940168
hsa-miR-339-5p	26.8333	5.41792	9.89945	4.61636	0	51.8968	1.33673	0.418713	0.802846	0.943212
hsa-miR-122-5p	8.97578	126.418	4.77503	2.93769	98.3703	6.22196	-1.30015	-0.378677	0.805279	0.944527
hsa-miR-409-3p	320.308	82.1718	380.779	0.792709	1005.95	1.31981	1.28679	0.363781	0.809803	0.945327
hsa-miR-30d-5p	4607.11	5368.25	1595.03	3552.22	331.772	9541.76	1.16037	0.214591	0.809904	0.945327
hsa-miR-204-5p	1024.84	155.314	557.222	11.0979	1355.92	17.8646	-1.25468	-0.327323	0.80895	0.945327
hsa-miR-99a-5p	185.061	53.7277	267.518	5.31581	382.287	6.08056	-1.28663	-0.3636	0.812293	0.946578
hsa-miR-3192-5p	0.328955	0	0.465856	0	0.699647	0	-1.37897	-0.463589	0.815305	0.94797
hsa-miR-589-3p	2.34968	0	0.698784	0	2.23887	0	-1.42828	-0.51428	0.816124	0.94797
hsa-let-7a-3p	73.122	312.433	80.8843	397.474	41.0693	140.418	1.24315	0.313996	0.822384	0.9537
hsa-miR-134-5p	50.4711	8.57837	29.9895	0.0466299	68.5654	0.0942722	-1.29792	-0.376197	0.825984	0.954795
hsa-miR-450a-1-3p	0.187974	42.8919	0.524088	22.0093	0	10.3699	-1.33958	-0.421783	0.825462	0.954795
hsa-let-7b-3p	40.1795	69.0785	23.2928	47.2828	5.24735	108.224	1.21614	0.282305	0.827316	0.9548
hsa-miR-107	18.9384	14.4478	14.9074	2.93769	0.139929	35.4935	-1.25268	-0.325018	0.831108	0.956107
hsa-miR-579-5p	1.03386	0.451493	2.73691	0.32641	3.00848	0	-1.32524	-0.406249	0.830048	0.956107
hsa-miR-30c-1-3p	2.44367	0	0.698784	4.38322	0	0	1.34474	0.427329	0.845189	0.968092
hsa-miR-1276	0.422942	0.451493	0.524088	0	1.88905	0	1.31144	0.391151	0.844239	0.968092
hsa-miR-1843	5.35727	32.056	8.15249	25.46	2.72862	9.00299	-1.20523	-0.269312	0.845566	0.968092
hsa-miR-548d-5p	1.40981	0	0.640552	0	2.93852	0	1.34016	0.422402	0.84717	0.968387
hsa-miR-6750-3p	0.328955	0	0.407624	0	0.699647	0	-1.29072	-0.36818	0.85105	0.971277
hsa-miR-431-5p	93.9872	20.3172	86.4746	0.0466299	163.158	0.188544	-1.22958	-0.298163	0.8557	0.975037
hsa-miR-129-1-3p	2.49066	0	0.174696	0.559559	1.67915	0	-1.28266	-0.359134	0.862058	0.980727
hsa-miR-6516-5p	0.375949	0.451493	2.38751	0	0	4.24225	1.28578	0.362643	0.869203	0.984477
hsa-miR-204-3p	1.69177	0	0.640552	0	3.07845	0	1.24425	0.315281	0.883686	0.984477
hsa-miR-4731-3p	0.563923	0	0.989945	0	2.09894	0	1.23593	0.305602	0.881707	0.984477
hsa-miR-4749-3p	1.97373	0	0.815249	0	0	3.53521	1.21432	0.280145	0.892147	0.984477
hsa-miR-5582-3p	0.422942	0.451493	2.38751	0.0466299	0.909541	3.20525	1.21245	0.277922	0.886824	0.984477
hsa-miR-92b-5p	3.94746	0	0.931713	0.27978	3.07845	2.96957	1.20139	0.264705	0.884156	0.984477
hsa-miR-181a-2-3p	14.944	1.80597	15.0239	1.35227	35.8219	0.188544	1.16746	0.223372	0.888124	0.984477
hsa-miR-425-5p	730.045	495.288	341.997	358.211	298.049	742.959	-1.12025	-0.163815	0.88779	0.984477
hsa-miR-196b-5p	541.272	422.598	472.262	327.575	633.25	311.522	-1.12952	-0.175715	0.878036	0.984477
hsa-miR-326	11.9364	30.7015	12.1123	23.6414	4.05795	19.2787	-1.14709	-0.197975	0.891834	0.984477
hsa-miR-1307-3p	174.628	39.2799	235.316	11.6575	343.107	33.2781	-1.15856	-0.21233	0.8838	0.984477
hsa-miR-1249-3p	3.00759	50.5672	1.92166	16.134	3.5682	27.0561	-1.17366	-0.231011	0.878929	0.984477
hsa-miR-6764-5p	0.563923	0.451493	0.524088	0.606189	0.769611	0	-1.1801	-0.238915	0.891617	0.984477
hsa-miR-3940-3p	0.422942	0.451493	0.873481	0.652819	0.909541	0	-1.18724	-0.247607	0.894108	0.984477
hsa-miR-664a-3p	6.76708	4.06344	13.4516	0	20.3597	0	-1.19696	-0.259373	0.893724	0.984477
hsa-miR-200b-3p	1.08085	0.902986	1.51403	0.885969	0.279859	1.83831	-1.2023	-0.2658	0.87973	0.984477
hsa-miR-671-5p	13.8161	3.61195	12.8693	15.3879	2.79859	7.54177	-1.20305	-0.2667	0.869949	0.984477
hsa-miR-589-5p	7.47198	1.80597	5.29912	0	12.1039	0	-1.21349	-0.279162	0.884026	0.984477
hsa-miR-6889-3p	0.65791	0	0	0	0.629682	0	-1.23631	-0.306037	0.885284	0.984477
hsa-miR-103a-2-5p	2.39667	0	2.73691	3.54388	0	0.659905	-1.26592	-0.340189	0.872353	0.984477
hsa-miR-548au-5p	1.36281	0	0.349392	0	1.46926	0	-1.27159	-0.346637	0.868132	0.984477
hsa-miR-770-5p	1.26883	1.35448	2.96983	0	6.64664	0	1.17375	0.231127	0.907378	0.992246
hsa-miR-887-5p	1.31582	0.451493	0.640552	0	2.93852	0	1.17151	0.228364	0.913833	0.992246
hsa-miR-548w	1.55079	0	0.757017	0	2.86855	0	1.16995	0.226441	0.918398	0.992246
hsa-miR-3661	0.751897	0	1.68873	0	3.00848	0	1.16612	0.22172	0.91856	0.992246
hsa-miR-1292-3p	0	0	0.989945	0	1.25936	0	1.14892	0.200284	0.929137	0.992246
hsa-miR-370-5p	1.64478	0	1.86343	0	4.12792	0.0942722	1.14527	0.195686	0.926305	0.992246
hsa-miR-101-5p	1.73876	0	0.58232	0.559559	0	2.30967	1.13407	0.181512	0.926448	0.992246
hsa-miR-412-5p	3.71249	0	3.02807	0	7.76608	0.0471361	1.13381	0.181179	0.92994	0.992246
hsa-miR-3913-5p	1.73876	0	0	0.512929	1.60919	0	1.12224	0.166384	0.935122	0.992246
hsa-miR-34c-3p	0.516929	140.414	1.33934	68.2662	1.46926	89.1815	1.11939	0.162712	0.920196	0.992246
hsa-miR-7706	3.85347	0.451493	0.640552	0	5.66714	0	1.11767	0.160489	0.939517	0.992246
hsa-miR-31-3p	102.728	190.53	91.6572	236.88	41.1392	149.704	1.11337	0.154931	0.906082	0.992246
hsa-miR-151b	7.28401	0.902986	4.07624	3.54388	3.91802	7.40037	1.11268	0.154045	0.924924	0.992246
hsa-miR-429	1.64478	5.41792	0.931713	2.93769	1.60919	2.54535	1.10849	0.148598	0.932103	0.992246
hsa-miR-323a-3p	111.61	19.4142	115.707	0.0932599	271.463	0.0471361	1.10027	0.137858	0.934753	0.992246
hsa-miR-487a-5p	22.134	2.70896	19.9154	0	48.9753	0.0471361	1.09214	0.127159	0.94051	0.992246
hsa-miR-1304-3p	4.4174	2.25747	14.0339	0	20.9194	1.83831	1.09044	0.124907	0.94602	0.992246
hsa-miR-3152-5p	8.0359	1.80597	10.4818	0.0932599	22.1088	0.141408	1.08998	0.124302	0.946418	0.992246
hsa-miR-6746-3p	1.4568	0	2.9116	0	4.89753	0	1.08835	0.122138	0.955909	0.992246
hsa-miR-301a-3p	5.92119	73.1419	8.61834	55.7694	6.78657	32.0525	1.0879	0.12154	0.934983	0.992246
hsa-miR-6509-3p	2.30269	0.451493	0.116464	0	1.25936	1.97972	1.07597	0.105644	0.955493	0.992246
hsa-let-7f-2-3p	2.02072	1.80597	4.13447	8.34676	0.209894	0	1.06589	0.0920527	0.961898	0.992246
hsa-miR-181c-5p	26.5514	160.732	33.3087	107.715	19.4502	104.218	1.05315	0.0747046	0.954693	0.992246
hsa-miR-3194-3p	1.08085	0	0	0	1.25936	0	1.05199	0.0731153	0.972974	0.992246
hsa-miR-425-3p	37.9238	7.22389	33.9493	32.6876	27.3562	23.7566	1.04072	0.0575786	0.967824	0.992246
hsa-miR-4641	0.0469936	0	0.640552	0	0.839576	0	1.03355	0.0476038	0.981108	0.992246
hsa-miR-2682-3p	2.67863	0.451493	3.49392	0.0932599	6.85654	0.0942722	1.0303	0.0430629	0.981899	0.992246
hsa-miR-668-3p	6.90806	0.902986	4.7168	0	12.9435	0.0471361	1.02492	0.0355046	0.985346	0.992246
hsa-miR-27a-3p	2777.23	5124.45	3372.63	5325.28	3088.1	3101.65	1.02155	0.0307645	0.971119	0.992246
hsa-miR-487b-3p	120.492	26.1866	160.72	0.23315	313.652	0.23568	1.02142	0.030579	0.985337	0.992246
hsa-miR-484	362.884	511.09	367.677	432.586	245.156	582.272	1.01593	0.0227957	0.983314	0.992246
hsa-miR-7-1-3p	14.991	6.3209	13.3934	13.1963	15.1124	7.35323	-1.02107	-0.0300847	0.981896	0.992246
hsa-miR-130b-5p	39.0987	9.48136	47.5173	0.746079	89.8346	3.72375	-1.02148	-0.0306572	0.983609	0.992246
hsa-miR-27a-5p	17.3406	32.5075	12.1705	38.05	8.1159	13.6223	-1.02358	-0.0336282	0.981075	0.992246
hsa-miR-331-3p	23.6848	38.8284	10.54	20.1441	28.8954	20.5513	-1.02731	-0.0388737	0.977694	0.992246
hsa-miR-320c	4.22942	2.25747	3.31923	2.70454	5.31731	2.3568	-1.03178	-0.0451315	0.977381	0.992246
hsa-miR-483-3p	0.140981	67.724	0.349392	16.9267	5.31731	43.5066	-1.03247	-0.0461017	0.977274	0.992246
hsa-miR-574-5p	139.383	325.978	142.727	178.593	301.548	105.726	-1.03563	-0.0505087	0.969581	0.992246
hsa-miR-4521	0.751897	0	0.698784	0	1.53922	0	-1.04382	-0.0618791	0.975853	0.992246
hsa-miR-411-3p	59.4469	12.6418	66.4428	0	132.513	0.0942722	-1.04551	-0.0642096	0.969882	0.992246
hsa-miR-769-3p	1.97373	0.451493	2.27105	0	4.5477	0.0942722	-1.04815	-0.0678388	0.973938	0.992246
hsa-miR-32-3p	0.751897	0.451493	0.524088	1.67868	0	0	-1.05232	-0.0735797	0.971128	0.992246
hsa-miR-532-5p	233.605	322.818	309.154	256.325	251.593	309.873	-1.05433	-0.0763283	0.950215	0.992246
hsa-miR-449a	1.4568	0.451493	2.21282	1.02586	3.07845	0	-1.05741	-0.0805347	0.96844	0.992246
hsa-miR-299-5p	4.32341	0	4.60033	0	8.53569	0	-1.05978	-0.0837666	0.966406	0.992246
hsa-miR-320d	0.845885	1.35448	1.80519	1.11912	0.139929	2.45108	-1.06706	-0.0936469	0.956748	0.992246
hsa-miR-6511b-3p	1.64478	0.451493	0	0	2.02898	0	-1.06864	-0.095781	0.964262	0.992246
hsa-miR-127-3p	29977.6	3506.3	18366.1	14.6418	48431.2	67.876	-1.06877	-0.0959551	0.947206	0.992246
hsa-miR-323b-3p	63.0184	6.3209	37.0938	0	99.6297	0.0471361	-1.06898	-0.0962311	0.956351	0.992246
hsa-miR-4742-3p	2.49066	0	0.815249	0	3.21837	0	-1.07115	-0.0991645	0.960948	0.992246
hsa-miR-7-5p	2274.44	4804.79	2292.42	3630.98	1365.71	3656.86	-1.08281	-0.114787	0.905101	0.992246
hsa-miR-221-3p	547.898	484.904	866.784	409.597	583.575	761.766	-1.08324	-0.115355	0.918632	0.992246
hsa-miR-10526-3p	1.73876	0	1.39757	0	3.00848	0	-1.09057	-0.125087	0.951577	0.992246
hsa-miR-6726-3p	0.516929	0	0.465856	0.27978	0.839576	0	-1.11479	-0.156777	0.936979	0.992246
hsa-miR-1908-5p	3.05458	0	0.873481	0	3.63816	0	-1.11768	-0.160505	0.94343	0.992246
hsa-miR-216a-3p	4.18243	0	0.815249	0	4.5477	0	-1.1279	-0.17364	0.938608	0.992246
hsa-miR-1296-5p	3.90047	0	2.38751	0.0466299	5.59717	0	-1.14177	-0.19127	0.924042	0.992246
hsa-miR-432-3p	0.939872	0.902986	2.73691	0	4.05795	0.0471361	-1.14252	-0.192222	0.926172	0.992246
hsa-miR-3085-3p	0.845885	0	0	0	0.839576	0	-1.14974	-0.20131	0.929853	0.992246
hsa-miR-1284	9.68068	0.902986	4.25094	0	8.81555	4.24225	-1.15306	-0.205468	0.909239	0.992246
hsa-miR-1304-5p	0.798891	0	0	0.746079	0	0	-1.19505	-0.257073	0.911857	0.992246
hsa-miR-222-3p	1241.71	940.46	1414.57	775.736	1796.34	990.942	-1.00982	-0.0140993	0.988603	0.992745
hsa-miR-299-3p	2.34968	0	0.58232	0	3.00848	0	-1.02154	-0.0307471	0.988289	0.992745
hsa-miR-1290	0	0	1.33934	0	1.46926	0	1.01641	0.0234875	0.991205	0.99397
hsa-miR-218-5p	108.367	73.5934	90.3179	97.6431	126.426	47.0418	-1.00774	-0.0111231	0.992871	0.994254
hsa-miR-331-5p	2.30269	0.451493	2.9116	1.07249	2.58869	3.01671	1.00298	0.0042889	0.997944	0.997944
hsa-miR-135b-3p	0	0	0	0	1.32933	0	43.0432	5.42771	0.0798895	#N/A
hsa-miR-6845-3p	0	0	0	0	1.32933	0	43.0432	5.42771	0.082077	#N/A
hsa-miR-6846-3p	0	0	0	0	1.32933	0	43.0432	5.42771	0.0827617	#N/A
hsa-miR-3944-3p	0	0	0	0	1.32933	0	43.0432	5.42771	0.0830763	#N/A
hsa-miR-1273h-5p	0	0	0	0	1.25936	0	40.7831	5.3499	0.0908614	#N/A
hsa-miR-508-3p	0	0	0	0	1.25936	0	40.7831	5.3499	0.0885626	#N/A
hsa-miR-6753-3p	0	0	0	0	1.25936	0	40.7831	5.3499	0.0874857	#N/A
hsa-miR-3529-5p	0	0	0	0.0466299	1.1894	0	40.0296	5.323	0.0850664	#N/A
hsa-miR-6769b-3p	0	0	0	0	1.1894	0	38.5222	5.26762	0.0876731	#N/A
hsa-miR-3174	0	0	0	0	1.1894	0	38.5222	5.26762	0.0864335	#N/A
hsa-miR-3193	0	0	0	0	1.1894	0	38.5222	5.26762	0.0851262	#N/A
hsa-miR-6721-5p	0	0	0	0	1.1894	0	38.5222	5.26762	0.0852932	#N/A
hsa-miR-4642	0	0	0	0	1.11943	0.0471361	37.7669	5.23905	0.0820746	#N/A
hsa-miR-6779-5p	0	0	0	0	1.11943	0	36.2603	5.18032	0.0911664	#N/A
hsa-miR-4661-5p	0	0	0	0	1.04947	0	33.9972	5.08735	0.097874	#N/A
hsa-miR-6827-3p	0	0	0	0	1.04947	0	33.9972	5.08735	0.0973161	#N/A
hsa-miR-3163	0	0	0	0	1.04947	0	33.9972	5.08735	0.0976786	#N/A
hsa-miR-5189-5p	0	0	0	0	1.04947	0	33.9972	5.08735	0.0963553	#N/A
hsa-miR-6755-3p	0	0	0	0	1.04947	0	33.9972	5.08735	0.0934244	#N/A
hsa-miR-3175	0	0	0	0	0.979505	0	31.733	4.98791	0.105403	#N/A
hsa-miR-4436b-5p	0	0	0	0	0.909541	0	29.4673	4.88104	0.103868	#N/A
hsa-miR-3074-3p	0	0	0	0.839339	0	0	27.9959	4.80714	0.114496	#N/A
hsa-miR-1224-5p	0	0	0	0	0.839576	0	27.1999	4.76553	0.114063	#N/A
hsa-miR-1913	0	0	0	0	0.839576	0	27.1999	4.76553	0.114752	#N/A
hsa-miR-6786-3p	0	0	0	0	0.769611	0	24.9305	4.63984	0.120589	#N/A
hsa-miR-6842-5p	0	0	0	0	0.769611	0	24.9305	4.63984	0.119155	#N/A
hsa-miR-4725-5p	0	0	0	0	0.629682	0	20.3838	4.34935	0.144414	#N/A
hsa-miR-302d-3p	0	0	0	0.512929	0	0	17.5037	4.12959	0.163548	#N/A
hsa-miR-4723-5p	0	0	0	0	0.489753	0	15.8217	3.98383	0.174954	#N/A
hsa-miR-4795-5p	0	0	0	0.41967	0	0	14.5086	3.85884	0.189228	#N/A
hsa-miR-19b-1-5p	0	0	0	0.41967	0	0	14.5086	3.85884	0.189489	#N/A
hsa-miR-10401-5p	0	0	0	0.41967	0	0	14.5086	3.85884	0.190316	#N/A
hsa-miR-6779-3p	0	0	0	0	0.419788	0	13.5314	3.75824	0.187839	#N/A
hsa-miR-10524-5p	0	0	0	0	0.419788	0	13.5314	3.75824	0.185969	#N/A
hsa-miR-1228-3p	0	0	0	0.23315	0	0	8.53031	3.0926	0.261554	#N/A
hsa-miR-378f	0	0	0.058232	0.559559	0	0.0471361	6.0262	2.59125	0.245496	#N/A
hsa-miR-378c	0	0	0	0.0466299	0.0699647	0.0471361	5.76785	2.52803	0.312158	#N/A
hsa-miR-378e	0	0	0	0	0	0.141408	5.59183	2.48332	0.349561	#N/A
hsa-miR-3074-5p	0	0	0	0.13989	0	0	5.55478	2.47373	0.356436	#N/A
hsa-miR-302a-3p	0	0	0	0.13989	0	0	5.55478	2.47373	0.357579	#N/A
hsa-miR-1303	0.0469936	0	0.058232	0	0.769611	0.0471361	4.67807	2.22591	0.278578	#N/A
hsa-miR-4433b-3p	0	0	0	0	0.139929	0	4.20417	2.07182	0.437584	#N/A
hsa-miR-208b-3p	0	0	0	0	0	0.0942722	4.03898	2.01399	0.44548	#N/A
hsa-miR-296-3p	0	0	0	0	0	0.0942722	4.03898	2.01399	0.44661	#N/A
hsa-miR-6529-5p	0.0469936	0	0	0.0466299	0	0.188544	2.68582	1.42536	0.471856	#N/A
hsa-miR-219b-5p	0.187974	0	0	0.652819	0	0	2.4899	1.31609	0.540223	#N/A
hsa-miR-520d-3p	0	0	0	0	0.0699647	0	2.31098	1.2085	0.638069	#N/A
hsa-miR-6758-3p	0	0	0	0	0.0699647	0	2.31098	1.2085	0.638069	#N/A
hsa-miR-4800-3p	0	0	0	0	0.0699647	0	2.31098	1.2085	0.638069	#N/A
hsa-miR-4444	0	0	0	0	0.0699647	0	2.31098	1.2085	0.638069	#N/A
hsa-miR-762	0	0	0	0	0	0.0471361	2.3107	1.20833	0.638123	#N/A
hsa-miR-145-5p	0	0	0	0	0	0.0471361	2.3107	1.20833	0.638123	#N/A
hsa-miR-147a	0	0	0	0	0	0.0471361	2.3107	1.20833	0.638123	#N/A
hsa-miR-708-5p	0	0	0	0.0466299	0	0	2.31069	1.20832	0.638125	#N/A
hsa-miR-3940-5p	0	0	0	0.0466299	0	0	2.31069	1.20832	0.638125	#N/A
hsa-miR-6881-3p	0.187974	0	0	0	0.559717	0	2.03064	1.02193	0.620207	#N/A
hsa-miR-4728-3p	0.281962	0	0	0	0.629682	0	1.65231	0.724485	0.736446	#N/A
hsa-miR-6130	0.0939872	0	0	0.0932599	0	0.0471361	-1.01274	-0.0182634	0.991511	#N/A
hsa-miR-1827	0.0939872	0	0	0.0466299	0	0.0471361	-1.44606	-0.532129	0.757656	#N/A
hsa-miR-6508-3p	0	0	0.058232	0	0.0699647	0	-1.48024	-0.565834	0.776786	#N/A
hsa-miR-378b	0	0	0.058232	0	0	0.0471361	-1.48042	-0.56601	0.773612	#N/A
hsa-miR-4753-3p	0.422942	0	0	0.32641	0	0	-1.54444	-0.627088	0.756351	#N/A
hsa-miR-215-5p	0.187974	0	0.058232	0.18652	0	0	-1.71223	-0.775875	0.681413	#N/A
hsa-miR-33b-5p	0.140981	0	0	0.0466299	0	0.0471361	-2.04518	-1.03223	0.549913	#N/A
hsa-miR-92a-1-5p	0.0469936	0.451493	0.058232	0.0466299	0	0.0471361	-2.04634	-1.03305	0.53134	#N/A
hsa-miR-133b	0.0469936	0.902986	0	0.0466299	0	0.0471361	-2.08148	-1.05761	0.555554	#N/A
hsa-miR-381-5p	0.234968	0	0.465856	0	0.419788	0	-2.15816	-1.1098	0.568658	#N/A
hsa-miR-4433b-5p	0.0939872	0	0	0	0.0699647	0	-2.52733	-1.33761	0.483787	#N/A
hsa-miR-6131	0.0469936	0	0.058232	0	0.0699647	0	-2.52758	-1.33776	0.455368	#N/A
hsa-miR-3651	0.0939872	0	0	0	0	0.0471361	-2.52763	-1.33779	0.47879	#N/A
hsa-miR-202-5p	0	2.25747	0	0.41967	0.279859	0	-2.80616	-1.4886	0.471903	#N/A
hsa-miR-885-5p	0.563923	0	0.116464	0.0932599	0.139929	0	-4.11223	-2.03992	0.288377	#N/A
hsa-miR-320e	0.140981	0	0.232928	0	0.139929	0	-4.44151	-2.15105	0.253873	#N/A
hsa-miR-33a-3p	0.0469936	0	0	0	0	0	-5.87397	-2.55434	0.355933	#N/A
hsa-miR-6529-3p	0.0469936	0	0	0	0	0	-5.87397	-2.55434	0.355933	#N/A
hsa-miR-4301	0.0469936	0	0	0	0	0	-5.87397	-2.55434	0.355933	#N/A
hsa-miR-1298-5p	0.0469936	0	0	0	0	0	-5.87397	-2.55434	0.355933	#N/A
hsa-miR-579-3p	0.0469936	0	0	0	0	0	-5.87397	-2.55434	0.355933	#N/A
hsa-miR-4677-5p	0.0469936	0	0	0	0	0	-5.87397	-2.55434	0.355933	#N/A
hsa-miR-4306	0	0	0.058232	0	0	0	-5.87456	-2.55448	0.355901	#N/A
hsa-miR-4659b-5p	0	0	0.058232	0	0	0	-5.87456	-2.55448	0.355901	#N/A
hsa-miR-4423-5p	0	0.451493	0	0	0	0	-5.87672	-2.55501	0.357734	#N/A
hsa-miR-7975	0	0.451493	0	0	0	0	-5.87672	-2.55501	0.358252	#N/A
hsa-miR-6741-5p	0	0.451493	0	0	0	0	-5.87672	-2.55501	0.361342	#N/A
hsa-miR-302c-3p	0	0.451493	0	0	0	0	-5.87672	-2.55501	0.377133	#N/A
hsa-miR-551b-3p	0.328955	0	0	0	0.0699647	0	-6.39027	-2.67588	0.21282	#N/A
hsa-miR-651-3p	0.0939872	0	0	0	0	0	-10.0301	-3.32626	0.229863	#N/A
hsa-miR-4723-3p	0.0939872	0	0	0	0	0	-10.0301	-3.32626	0.23083	#N/A
hsa-miR-1538	0.0939872	0	0	0	0	0	-10.0301	-3.32626	0.231848	#N/A
hsa-miR-190a-3p	0.0939872	0	0	0	0	0	-10.0301	-3.32626	0.232874	#N/A
hsa-miR-3136-5p	0.0939872	0	0	0	0	0	-10.0301	-3.32626	0.233992	#N/A
hsa-miR-491-3p	0.0939872	0	0	0	0	0	-10.0301	-3.32626	0.235045	#N/A
hsa-miR-3684	0.0939872	0	0	0	0	0	-10.0301	-3.32626	0.23604	#N/A
hsa-miR-548t-5p	0	0	0.116464	0	0	0	-10.0321	-3.32655	0.240352	#N/A
hsa-miR-548f-5p	0	0	0.116464	0	0	0	-10.0321	-3.32655	0.24106	#N/A
hsa-miR-4466	0.65791	0	0	0	0.0699647	0	-10.8459	-3.43907	0.114292	#N/A
hsa-miR-3121-5p	0.0939872	0	0.465856	0	0	0.0471361	-10.8909	-3.44505	0.0954295	#N/A
hsa-miR-544a	0.187974	0	0.407624	0	0.0699647	0	-11.9544	-3.57947	0.0877532	#N/A
hsa-miR-6813-3p	0.140981	0	0	0	0	0	-14.1856	-3.82636	0.172958	#N/A
hsa-miR-5684	0.140981	0	0	0	0	0	-14.1856	-3.82636	0.171212	#N/A
hsa-miR-452-5p	0.140981	0	0	0	0	0	-14.1856	-3.82636	0.172096	#N/A
hsa-miR-3145-3p	0.140981	0	0	0	0	0	-14.1856	-3.82636	0.172958	#N/A
hsa-miR-6826-3p	0.140981	0	0	0	0	0	-14.1856	-3.82636	0.173801	#N/A
hsa-miR-3679-3p	0.140981	0	0	0	0	0	-14.1856	-3.82636	0.174627	#N/A
hsa-miR-6870-3p	0.140981	0	0	0	0	0	-14.1856	-3.82636	0.175436	#N/A
hsa-miR-4797-3p	0.140981	0	0	0	0	0	-14.1856	-3.82636	0.175902	#N/A
hsa-miR-581	0.140981	0	0	0	0	0	-14.1856	-3.82636	0.176361	#N/A
hsa-miR-7703	0.140981	0	0	0	0	0	-14.1856	-3.82636	0.177372	#N/A
hsa-miR-1179	0.187974	0	0	0	0	0	-17.3747	-4.11892	0.1421	#N/A
hsa-miR-6801-3p	0.187974	0	0	0	0	0	-17.3747	-4.11892	0.14093	#N/A
hsa-miR-6832-3p	0.187974	0	0	0	0	0	-17.3747	-4.11892	0.141874	#N/A
hsa-miR-519d-3p	0.187974	0	0	0	0	0	-17.3747	-4.11892	0.142795	#N/A
hsa-miR-10396b-5p	0.187974	0	0	0	0	0	-17.3747	-4.11892	0.141883	#N/A
hsa-miR-3196	0.187974	0	0	0	0	0	-17.3747	-4.11892	0.142562	#N/A
hsa-miR-4668-3p	0.187974	0	0	0	0	0	-17.3747	-4.11892	0.143228	#N/A
hsa-miR-5583-3p	0.187974	0	0	0	0	0	-17.3747	-4.11892	0.143881	#N/A
hsa-miR-605-5p	0.187974	0	0	0	0	0	-17.3747	-4.11892	0.144911	#N/A
hsa-miR-6834-3p	0.187974	0	0	0	0	0	-17.3747	-4.11892	0.144962	#N/A
hsa-miR-6784-3p	0.187974	0	0	0	0	0	-17.3747	-4.11892	0.145013	#N/A
hsa-miR-4804-3p	0.187974	0	0	0	0	0	-17.3747	-4.11892	0.145925	#N/A
hsa-miR-6762-3p	0.187974	0	0	0	0	0	-17.3747	-4.11892	0.147628	#N/A
hsa-miR-3911	0.187974	0	0	0	0	0	-17.3747	-4.11892	0.147736	#N/A
hsa-miR-548an	0.140981	0	0.058232	0	0	0	-18.3424	-4.19711	0.131257	#N/A
hsa-miR-548y	0.140981	0	0.058232	0	0	0	-18.3424	-4.19711	0.131574	#N/A
hsa-miR-200a-5p	0.140981	0	0.058232	0	0	0	-18.3424	-4.19711	0.131887	#N/A
hsa-miR-4766-5p	0	0	0.232928	0	0	0	-18.5949	-4.21684	0.144241	#N/A
hsa-miR-548g-5p	0	0	0.232928	0	0	0	-18.5949	-4.21684	0.144491	#N/A
hsa-miR-520f-3p	0.234968	0	0	0	0	0	-20.4833	-4.35638	0.12964	#N/A
hsa-miR-5002-5p	0.234968	0	0	0	0	0	-20.4833	-4.35638	0.128529	#N/A
hsa-miR-6855-3p	0.234968	0	0	0	0	0	-20.4833	-4.35638	0.127741	#N/A
hsa-miR-6501-5p	0.234968	0	0	0	0	0	-20.4833	-4.35638	0.126836	#N/A
hsa-miR-3115	0.234968	0	0	0	0	0	-20.4833	-4.35638	0.127972	#N/A
hsa-miR-2355-3p	0.234968	0	0	0	0	0	-20.4833	-4.35638	0.127655	#N/A
hsa-miR-4746-5p	0.234968	0	0	0	0	0	-20.4833	-4.35638	0.12777	#N/A
hsa-miR-6802-5p	0.234968	0	0	0	0	0	-20.4833	-4.35638	0.125948	#N/A
hsa-miR-3157-3p	0.234968	0	0	0	0	0	-20.4833	-4.35638	0.125811	#N/A
hsa-miR-6827-5p	0.234968	0	0	0	0	0	-20.4833	-4.35638	0.12744	#N/A
hsa-miR-6881-5p	0.234968	0	0	0	0	0	-20.4833	-4.35638	0.12906	#N/A
hsa-miR-675-5p	0.234968	0	0	0	0	0	-20.4833	-4.35638	0.130672	#N/A
hsa-miR-346	0.234968	0	0	0	0	0	-20.4833	-4.35638	0.130725	#N/A
hsa-miR-6740-3p	0.234968	0	0	0	0	0	-20.4833	-4.35638	0.130779	#N/A
hsa-miR-3164	0.234968	0	0	0	0	0	-20.4833	-4.35638	0.132196	#N/A
hsa-miR-3059-5p	0.234968	0	0	0	0	0	-20.4833	-4.35638	0.1324	#N/A
hsa-miR-548am-3p	0.187974	0	0.058232	0	0	0	-22.4972	-4.49168	0.110591	#N/A
hsa-miR-3617-3p	0.187974	0.451493	0	0	0	0	-23.1948	-4.53573	0.112875	#N/A
hsa-miR-5583-5p	0.281962	0	0	0	0	0	-23.5391	-4.55699	0.11607	#N/A
hsa-miR-643	0.281962	0	0	0	0	0	-23.5391	-4.55699	0.115076	#N/A
hsa-miR-149-3p	0.281962	0	0	0	0	0	-23.5391	-4.55699	0.11436	#N/A
hsa-miR-517a-3p	0.281962	0	0	0	0	0	-23.5391	-4.55699	0.114951	#N/A
hsa-miR-4737	0.281962	0	0	0	0	0	-23.5391	-4.55699	0.115533	#N/A
hsa-miR-548a-3p	0.281962	0	0	0	0	0	-23.5391	-4.55699	0.11517	#N/A
hsa-miR-3150b-5p	0.281962	0	0	0	0	0	-23.5391	-4.55699	0.115156	#N/A
hsa-miR-3146	0.281962	0	0	0	0	0	-23.5391	-4.55699	0.115578	#N/A
hsa-miR-570-3p	0.281962	0	0	0	0	0	-23.5391	-4.55699	0.118058	#N/A
hsa-miR-5696	0.281962	0	0	0	0	0	-23.5391	-4.55699	0.120545	#N/A
hsa-miR-518f-3p	0.281962	0	0	0	0	0	-23.5391	-4.55699	0.120168	#N/A
hsa-miR-6849-5p	0.281962	0	0	0	0	0	-23.5391	-4.55699	0.120956	#N/A
hsa-miR-6808-3p	0.281962	0	0	0	0	0	-23.5391	-4.55699	0.121479	#N/A
hsa-miR-6866-5p	0.281962	0	0	0	0	0	-23.5391	-4.55699	0.123583	#N/A
hsa-miR-6783-3p	0.281962	0	0	0	0	0	-23.5391	-4.55699	0.124218	#N/A
hsa-miR-4748	0	0	0.349392	0	0	0	-26.3278	-4.71852	0.11355	#N/A
hsa-miR-3150b-3p	0	0	0.349392	0	0	0	-26.3278	-4.71852	0.113676	#N/A
hsa-miR-1537-3p	0.328955	0	0	0	0	0	-26.5343	-4.72979	0.110852	#N/A
hsa-miR-660-3p	0.328955	0	0	0	0	0	-26.5343	-4.72979	0.111313	#N/A
hsa-miR-20b-3p	0.328955	0	0	0	0	0	-26.5343	-4.72979	0.10984	#N/A
hsa-miR-374c-5p	0.328955	0	0	0	0	0	-26.5343	-4.72979	0.110086	#N/A
hsa-miR-1185-2-3p	0.328955	0	0	0	0	0	-26.5343	-4.72979	0.110331	#N/A
hsa-miR-548n	0.328955	0	0	0	0	0	-26.5343	-4.72979	0.111563	#N/A
hsa-miR-6878-3p	0.328955	0	0	0	0	0	-26.5343	-4.72979	0.11279	#N/A
hsa-miR-4781-5p	0.328955	0	0	0	0	0	-26.5343	-4.72979	0.113821	#N/A
hsa-miR-6514-5p	0.328955	0	0	0	0	0	-26.5343	-4.72979	0.114092	#N/A
hsa-miR-4999-3p	0.328955	0	0	0	0	0	-26.5343	-4.72979	0.114362	#N/A
hsa-miR-6727-3p	0.328955	0	0	0	0	0	-26.5343	-4.72979	0.115466	#N/A
hsa-miR-4660	0.328955	0	0	0	0	0	-26.5343	-4.72979	0.116344	#N/A
hsa-miR-541-3p	0.328955	0	0	0	0	0	-26.5343	-4.72979	0.117639	#N/A
hsa-miR-6868-3p	0.328955	0	0	0	0	0	-26.5343	-4.72979	0.117023	#N/A
hsa-miR-4714-3p	0.234968	0	0.058232	0	0	0	-26.6515	-4.73615	0.100883	#N/A
hsa-miR-6804-5p	0.234968	0	0.058232	0	0	0	-26.6515	-4.73615	0.101028	#N/A
hsa-miR-4455	0.0469936	0	0.29116	0	0	0	-26.781	-4.74314	0.102474	#N/A
hsa-miR-548al	0	0.451493	0.232928	0	0	0	-27.5097	-4.78187	0.0959285	#N/A
hsa-miR-186-3p	0.234968	0.451493	0	0	0	0	-28.1522	-4.81518	0.0995588	#N/A
hsa-miR-499b-5p	0.375949	0	0	0	0	0	-29.4755	-4.88144	0.106542	#N/A
hsa-miR-656-5p	0.375949	0	0	0	0	0	-29.4755	-4.88144	0.106737	#N/A
hsa-miR-1271-3p	0.375949	0	0	0	0	0	-29.4755	-4.88144	0.106932	#N/A
hsa-miR-6852-5p	0.375949	0	0	0	0	0	-29.4755	-4.88144	0.107126	#N/A
hsa-miR-1197	0.375949	0	0	0	0	0	-29.4755	-4.88144	0.107319	#N/A
hsa-miR-7111-3p	0	0	0.407624	0	0	0	-30.0167	-4.90769	0.105407	#N/A
hsa-miR-6780a-3p	0	0	0.407624	0	0	0	-30.0167	-4.90769	0.105597	#N/A
hsa-miR-548ab	0.187974	0	0.174696	0	0	0	-30.8114	-4.94539	0.0880641	#N/A
hsa-miR-34a-3p	0.234968	0.451493	0.058232	0	0	0	-30.8196	-4.94578	0.089432	#N/A
hsa-miR-6849-3p	0.422942	0	0	0	0	0	-32.3709	-5.01663	0.0995511	#N/A
hsa-miR-9-3p	0.422942	0	0	0	0	0	-32.3709	-5.01663	0.101219	#N/A
hsa-miR-4479	0.422942	0	0	0	0	0	-32.3709	-5.01663	0.101379	#N/A
hsa-miR-6511b-5p	0.422942	0	0	0	0	0	-32.3709	-5.01663	0.101538	#N/A
hsa-miR-3620-3p	0.422942	0	0	0	0	0	-32.3709	-5.01663	0.101697	#N/A
hsa-miR-3127-3p	0.422942	0	0	0	0	0	-32.3709	-5.01663	0.101856	#N/A
hsa-miR-6882-3p	0.422942	0	0	0	0	0	-32.3709	-5.01663	0.102014	#N/A
hsa-miR-4474-3p	0.422942	0	0	0	0	0	-32.3709	-5.01663	0.100662	#N/A
hsa-miR-4504	0	0.451493	0.29116	0	0	0	-33.0327	-5.04582	0.0853017	#N/A
hsa-miR-4757-5p	0	0	0.465856	0	0	0	-33.6268	-5.07154	0.095749	#N/A
hsa-miR-556-3p	0	0	0.465856	0	0	0	-33.6268	-5.07154	0.0952341	#N/A
hsa-miR-6875-3p	0	0	0.465856	0	0	0	-33.6268	-5.07154	0.0949628	#N/A
hsa-miR-3939	0	0	0.465856	0	0	0	-33.6268	-5.07154	0.0945344	#N/A
hsa-miR-4765	0	0	0.465856	0	0	0	-33.6268	-5.07154	0.0954514	#N/A
hsa-miR-6886-3p	0	0	0.465856	0	0	0	-33.6268	-5.07154	0.0963618	#N/A
hsa-miR-450a-2-3p	0	0.902986	0	0	0	0	-34.581	-5.11191	0.0810605	#N/A
hsa-miR-618	0.469936	0	0	0	0	0	-35.2283	-5.13866	0.0925662	#N/A
hsa-miR-16-1-3p	0.469936	0	0	0	0	0	-35.2283	-5.13866	0.0927043	#N/A
hsa-miR-26a-1-3p	0.469936	0	0	0	0	0	-35.2283	-5.13866	0.0928421	#N/A
hsa-miR-7110-3p	0.469936	0	0	0	0	0	-35.2283	-5.13866	0.0921293	#N/A
hsa-miR-6776-5p	0.469936	0	0	0	0	0	-35.2283	-5.13866	0.0925275	#N/A
hsa-miR-6875-5p	0.469936	0	0	0	0	0	-35.2283	-5.13866	0.0929227	#N/A
hsa-miR-3179	0.516929	0	0	0	0	0	-38.054	-5.24997	0.0886005	#N/A
hsa-miR-5697	0.516929	0	0	0	0	0	-38.054	-5.24997	0.0874374	#N/A
hsa-miR-561-5p	0.0469936	0	0.465856	0	0	0	-38.3521	-5.26123	0.0784623	#N/A
hsa-miR-216b-5p	0	0	0.58232	0	0	0	-40.6793	-5.34622	0.0834903	#N/A
hsa-miR-3938	0	0	0.58232	0	0	0	-40.6793	-5.34622	0.08438	#N/A
hsa-miR-3188	0	0	0.58232	0	0	0	-40.6793	-5.34622	0.0829009	#N/A
hsa-miR-4727-5p	0	0	0.58232	0	0	0	-40.6793	-5.34622	0.0820021	#N/A
hsa-miR-6889-5p	0	0	0.58232	0	0	0	-40.6793	-5.34622	0.0821828	#N/A
hsa-miR-7109-3p	0.563923	0	0	0	0	0	-40.8534	-5.35238	0.0831404	#N/A
hsa-miR-6812-3p	0.563923	0	0	0	0	0	-40.8534	-5.35238	0.0845932	#N/A
hsa-miR-6856-3p	0.563923	0	0	0	0	0	-40.8534	-5.35238	0.0834596	#N/A
hsa-miR-4775	0.563923	0	0	0	0	0	-40.8534	-5.35238	0.0843618	#N/A
hsa-miR-3177-3p	0.375949	0.451493	0	0	0	0	-41.0723	-5.36009	0.0736206	#N/A
hsa-miR-182-3p	0.469936	0	0.058232	0	0	0	-41.732	-5.38308	0.0734989	#N/A
hsa-miR-548aw	0.0469936	0	0.524088	0	0	0	-41.9947	-5.39214	0.0737318	#N/A
hsa-miR-5088-3p	0.140981	0	0.407624	0	0	0	-43.2714	-5.43534	0.0665611	#N/A
hsa-miR-548t-3p	0.610917	0	0	0	0	0	-43.6309	-5.44728	0.0777172	#N/A
hsa-miR-489-3p	0.610917	0	0	0	0	0	-43.6309	-5.44728	0.0778779	#N/A
hsa-miR-6892-3p	0.610917	0	0	0	0	0	-43.6309	-5.44728	0.0759669	#N/A
hsa-miR-6716-3p	0.610917	0	0	0	0	0	-43.6309	-5.44728	0.0754936	#N/A
hsa-miR-199b-5p	0	0	0.640552	0	0	0	-44.1451	-5.46418	0.0755409	#N/A
hsa-miR-517-5p	0	0	0.640552	0	0	0	-44.1451	-5.46418	0.0752534	#N/A
hsa-miR-6765-3p	0	0	0.640552	0	0	0	-44.1451	-5.46418	0.0763711	#N/A
hsa-miR-6754-3p	0	0	0.640552	0	0	0	-44.1451	-5.46418	0.0770685	#N/A
hsa-miR-6729-5p	0	0	0.640552	0	0	0	-44.1451	-5.46418	0.077019	#N/A
hsa-miR-1343-5p	0	0	0.640552	0	0	0	-44.1451	-5.46418	0.0769694	#N/A
hsa-miR-3180-3p	0.422942	0.451493	0	0	0	0	-44.9424	-5.49001	0.0690759	#N/A
hsa-miR-6877-3p	0.65791	0	0	0	0	0	-46.39	-5.53574	0.0730154	#N/A
hsa-miR-943	0.65791	0	0	0	0	0	-46.39	-5.53574	0.0728771	#N/A
hsa-miR-7114-3p	0.65791	0	0	0	0	0	-46.39	-5.53574	0.0749123	#N/A
hsa-miR-6895-5p	0	0	0.698784	0	0	0	-47.5814	-5.57233	0.074216	#N/A
hsa-miR-5004-3p	0	0	0.757017	0	0	0	-50.994	-5.67226	0.0681121	#N/A
hsa-miR-6783-5p	0	0	0.757017	0	0	0	-50.994	-5.67226	0.0674683	#N/A
hsa-miR-6743-3p	0.234968	0	0.407624	0	0	0	-51.5963	-5.6892	0.0572328	#N/A
hsa-miR-4690-3p	0.751897	0	0	0	0	0	-51.8647	-5.69668	0.0657946	#N/A
hsa-miR-545-3p	0.751897	0	0	0	0	0	-51.8647	-5.69668	0.0657768	#N/A
hsa-miR-6741-3p	0.751897	0	0	0	0	0	-51.8647	-5.69668	0.0646396	#N/A
hsa-miR-4738-3p	0	0.451493	0.524088	0	0	0	-51.9469	-5.69897	0.060095	#N/A
hsa-miR-7854-3p	0.65791	0	0.058232	0	0	0	-52.9124	-5.72553	0.0596052	#N/A
hsa-miR-376a-5p	0.563923	0	0.116464	0	0	0	-53.5172	-5.74193	0.0578579	#N/A
hsa-miR-7849-3p	0	0	0.815249	0	0	0	-54.3874	-5.7652	0.0651818	#N/A
hsa-miR-655-5p	0.798891	0	0	0	0	0	-54.5846	-5.77042	0.0643173	#N/A
hsa-miR-6752-3p	0.798891	0	0	0	0	0	-54.5846	-5.77042	0.0661193	#N/A
hsa-miR-4796-5p	0.140981	0	0.58232	0	0	0	-54.5852	-5.77044	0.0537065	#N/A
hsa-miR-556-5p	0	0.451493	0.58232	0	0	0	-56.2083	-5.81271	0.0543937	#N/A
hsa-miR-3166	0.845885	0	0	0	0	0	-57.2952	-5.84034	0.0634493	#N/A
hsa-miR-4799-5p	0	0	0.873481	0	0	0	-57.765	-5.85212	0.0591921	#N/A
hsa-miR-5009-5p	0	0	0.873481	0	0	0	-57.765	-5.85212	0.0582888	#N/A
hsa-miR-5001-3p	0.234968	0	0.524088	0	0	0	-59.8845	-5.90411	0.0496215	#N/A
hsa-miR-4781-3p	0.375949	0.451493	0.29116	0	0	0	-59.9174	-5.9049	0.0452683	#N/A
hsa-miR-137-5p	0	0.451493	0.640552	0	0	0	-60.3525	-5.91534	0.0524231	#N/A
hsa-miR-548d-3p	0.0939872	0	0.757017	0	0	0	-60.5095	-5.91909	0.0510776	#N/A
hsa-miR-6883-3p	0	0.902986	0.407624	0	0	0	-60.6313	-5.92199	0.0480665	#N/A
hsa-miR-4747-3p	0.798891	0	0.058232	0	0	0	-61.0825	-5.93269	0.0538338	#N/A
hsa-miR-371a-3p	0	0	0.931713	0	0	0	-61.1297	-5.9338	0.0553649	#N/A
hsa-miR-3085-5p	0.845885	0	0.058232	0	0	0	-63.7792	-5.99501	0.0512502	#N/A
hsa-miR-6817-3p	0.516929	0	0.232928	0	0	0	-64.0338	-6.00076	0.0443043	#N/A
hsa-miR-4687-3p	0	0.451493	0.698784	0	0	0	-64.3996	-6.00898	0.0466655	#N/A
hsa-miR-6824-3p	0.234968	0	0.640552	0	0	0	-67.3404	-6.0734	0.042748	#N/A
hsa-miR-18b-3p	0	0	1.04818	0	0	0	-67.8287	-6.08382	0.0550288	#N/A
hsa-miR-4758-3p	0.422942	0	0.407624	0	0	0	-68.2042	-6.09179	0.0412549	#N/A
hsa-miR-610	0	0.451493	0.757017	0	0	0	-68.3652	-6.09519	0.0453482	#N/A
hsa-miR-6862-3p	0.281962	0	0.640552	0	0	0	-71.9886	-6.1697	0.0438641	#N/A
hsa-miR-3614-5p	0.328955	0	0.58232	0	0	0	-72.3765	-6.17745	0.0429225	#N/A
hsa-miR-6818-5p	0.281962	0	0.698784	0	0	0	-75.5432	-6.23923	0.0400843	#N/A
hsa-miR-210-5p	0.187974	0	0.873481	0	0	0	-76.1722	-6.25119	0.0407111	#N/A
hsa-miR-6804-3p	0.422942	0	0.524088	0	0	0	-76.5201	-6.25777	0.0388808	#N/A
hsa-miR-616-5p	0.281962	0	0.757017	0	0	0	-78.9437	-6.30275	0.0368627	#N/A
hsa-miR-15a-3p	0	0.451493	0.989945	0	0	0	-83.6265	-6.38589	0.040717	#N/A
hsa-miR-4667-3p	0.516929	0	0.524088	0	0	0	-84.8201	-6.40633	0.0382276	#N/A
hsa-miR-6770-3p	0.375949	0	0.698784	0	0	0	-84.8456	-6.40677	0.0372341	#N/A
