# Supplementary material for: Distinct brain and lung endothelial miRNA/mRNA profiles after exposure to Plasmodium falciparum-infected red blood cells
Source: iScience. 2024 Oct 28;27(11):111265. doi: 10.1016/j.isci.2024.111265 (PMC11576406; doi:10.1016/j.isci.2024.111265)
Supplement: Table S8. miRNA profiles of HMVEC-L1.5 and HMVEC-Lstatic/ mRNA profiles of HMVEC-L1.5 and HMVEC-Lstatic [file mmc9.xlsx]

## Sheet: mRNA
Name	Lung Static#1	Lung Static#2	Lung Static#3	Lung Flow#1	Lung Flow#2	Lung Flow#3	Fold change	Log fold change	P-value	FDR p-value
ANGPTL4	2.04201	6.33751	2.222	193.385	326.693	188.385	65.1838	6.02644	5.19799e-70	7.09318e-66
PLIN2	58.5376	75.4163	74.0665	604.352	587.009	473.115	8.005	3.0009	1.59373e-48	1.0874e-44
HMOX1	98.3568	102.351	61.8455	1937.36	1016.41	721.426	13.989	3.80622	2.29195e-40	1.04253e-36
LMOD1	76.5754	57.6713	37.4036	0.738816	1.63893	2.64865	-36.1285	-5.17507	2.04326e-34	6.97058e-31
CXCL8	3.06302	5.07001	4.44399	158.107	39.6074	113.892	24.5609	4.61829	1.74112e-30	4.75186e-27
HYOU1	206.583	226.883	144.43	1149.23	746.531	1151.5	5.2696	2.39769	1.32941e-28	3.02352e-25
IGFBP3	445.839	424.296	157.391	40.2655	34.9637	41.3852	-8.80651	-3.13857	5.05147e-28	9.84747e-25
OSGIN1	14.2941	9.50626	6.66599	108.052	93.9651	57.9392	8.50108	3.08765	1.79232e-27	3.05725e-24
GCLM	36.4158	50.0663	38.8849	199.665	150.235	195.338	4.33788	2.11699	4.19007e-25	6.35307e-22
ADAMTS5	110.609	120.096	155.91	23.6421	18.8476	35.0946	-5.01643	-2.32666	3.12172e-24	4.2599e-21
HSPA5	1602.3	1580.57	958.421	7377.82	4667.39	6480.25	4.47303	2.16125	5.23238e-24	6.491e-21
AKR1C1	177.655	187.59	163.687	660.687	935.007	592.635	4.13557	2.04809	8.63306e-24	9.81722e-21
SRXN1	101.079	98.8651	87.0282	376.058	390.064	317.838	3.7773	1.91736	1.60857e-22	1.6885e-19
BAALC	36.7562	37.7082	41.1069	2.03175	3.82416	7.61487	-9.59151	-3.26176	6.8337e-22	6.6609e-19
CPT1A	27.5671	31.6875	27.7749	130.401	151.327	91.0473	4.28299	2.09862	7.38326e-22	6.7168e-19
FOSB	30.2898	51.3338	42.9586	4.06349	7.10201	2.31757	-9.09817	-3.18558	2.31922e-21	1.978e-18
ABCC3	25.8655	26.6175	31.4783	124.121	117.183	94.0271	4.02377	2.00855	3.85617e-21	3.09537e-18
PLAU	9.86972	9.82314	12.5913	58.1818	189.296	75.1554	9.96991	3.31758	4.26062e-21	3.23003e-18
ETV5	14.2941	19.9631	20.7386	82.7474	82.4926	72.1757	4.35315	2.12206	7.97598e-21	5.72844e-18
HSPA1B	92.2308	85.8732	68.5115	1429.98	282.442	714.473	9.83712	3.29824	2.42813e-20	1.65672e-17
NREP	679.989	649.594	373.666	59.29	129.475	125.811	-5.4228	-2.43904	4.46348e-19	2.90041e-16
HSPA1A	95.2938	127.701	73.6962	1921.66	357.286	758.176	10.2325	3.35508	1.06894e-18	6.63032e-16
gene:ENSG00000286190	84.0627	74.7826	48.5136	13.6681	19.1208	14.2365	-4.42296	-2.14501	3.9175e-18	2.32427e-15
FOS	51.0503	70.6632	54.8092	13.2987	14.4772	6.29054	-5.07271	-2.34276	5.74217e-18	3.2649e-15
INSYN2B	10.5504	10.14	9.62865	46.3607	48.8946	43.0406	4.55953	2.18889	2.08778e-17	1.13959e-14
DACH2	52.4116	41.8275	61.8455	6.27994	10.9262	13.9054	-5.14022	-2.36183	2.28691e-17	1.20028e-14
SQSTM1	772.56	794.09	759.182	3323.38	2166.39	2021.91	3.23018	1.69161	2.7901e-17	1.41014e-14
PRSS35	24.1638	19.9631	18.887	1.47763	2.73154	1.32432	-11.3637	-3.50636	9.04242e-17	4.40689e-14
TRIB3	66.7057	77.3176	46.2916	480.6	169.083	351.608	5.25723	2.3943	1.35982e-16	6.39864e-14
GCLC	104.823	106.153	93.6941	307.717	259.77	414.183	3.21651	1.6855	1.87037e-16	8.5077e-14
NIBAN1	89.1678	91.2601	78.1402	255.261	239.283	264.534	2.92294	1.54742	4.94989e-16	2.17891e-13
SLC7A11	244.361	224.665	197.758	648.496	593.837	688.318	2.89144	1.53179	7.34385e-16	3.03679e-13
DNAJB9	16.3361	12.9919	14.8133	187.29	31.4127	281.75	11.3116	3.49973	7.23598e-16	3.03679e-13
NYNRIN	70.7897	82.3876	87.0282	14.4069	27.8617	21.1892	-3.8272	-1.93629	7.63712e-16	3.06518e-13
PCDH18	387.642	373.913	547.352	43.5902	80.3074	136.737	-5.03279	-2.33136	1.37241e-15	5.35082e-13
TXNRD1	509.482	517.141	475.137	1604.52	1358.12	1226.32	2.7906	1.48057	1.67576e-15	6.35206e-13
TDP2	41.8612	56.7207	55.9202	141.114	129.202	202.291	3.05153	1.60953	4.71128e-15	1.73757e-12
PTGFR	38.4579	46.2638	41.8476	4.4329	8.19463	13.2432	-5.05083	-2.33652	1.08874e-14	3.90973e-12
MANF	79.2981	81.7538	61.1049	268.929	162.527	249.966	3.06474	1.61577	1.73844e-14	6.08276e-12
PDIA4	261.037	254.451	273.305	697.627	676.057	745.595	2.68551	1.4252	2.91123e-14	9.93167e-12
TIPARP	58.878	71.9307	74.0665	245.841	153.513	205.27	2.95456	1.56295	3.7695e-14	1.2546e-11
CXCL2	1.70168	2.21813	0.740665	34.355	12.0188	24.8311	14.7781	3.88539	6.5213e-14	2.1188e-11
TMEM119	35.7352	22.1813	37.0333	2.21645	6.28255	7.94595	-5.93535	-2.56933	1.32e-13	4.18902e-11
NQO1	205.903	204.385	194.795	460.467	706.104	515.493	2.77818	1.47414	1.73206e-13	5.37174e-11
OLFML2A	48.6679	57.3544	40.7366	6.83405	16.1161	12.5811	-4.20034	-2.07051	1.87779e-13	5.69431e-11
SPOCK1	104.483	114.392	71.8445	28.075	31.4127	35.4257	-3.08548	-1.6255	2.94197e-13	8.72743e-11
SERPING1	58.1973	76.0501	39.2553	8.12698	11.4725	19.5338	-4.49858	-2.16947	3.60983e-13	1.04808e-10
RASGRF2	1.36134	1.90125	2.222	28.075	27.3154	9.93244	11.8035	3.56115	5.96652e-13	1.69623e-10
FAT4	391.726	325.431	274.046	121.535	131.114	124.818	-2.6281	-1.39402	6.91765e-13	1.92649e-10
PDK4	1.02101	5.38688	3.33299	25.4892	15.0235	53.9662	9.53787	3.25367	8.71571e-13	2.37869e-10
HSP90B1	964.85	938.268	979.159	2791.8	1897.06	2740.69	2.57778	1.36613	1.24295e-12	3.32573e-10
KCNE4	32.6722	24.3994	22.5903	115.44	90.1409	64.5608	3.39868	1.76497	1.38165e-12	3.62578e-10
MYOCD	44.9242	33.2719	9.25831	4.06349	1.91208	1.65541	-11.0349	-3.46401	1.45334e-12	3.74193e-10
DNAJC3	86.4451	95.3795	77.3995	306.055	166.624	284.73	2.92063	1.54628	2.23566e-12	5.64959e-10
HSP90AA1	625.195	627.096	474.026	3052.97	1277.27	1570.98	3.41849	1.77336	2.30323e-12	5.71452e-10
CRISPLD2	308.003	295.011	139.615	92.7215	44.251	51.9798	-3.91991	-1.97082	2.73484e-12	6.66422e-10
PDGFRA	112.651	111.857	117.395	16.0693	42.8852	37.7433	-3.55782	-1.83099	2.91461e-12	6.9134e-10
CXCL3	1.36134	1.58438	0.740665	26.228	15.5698	11.2568	13.9813	3.80543	2.93842e-12	6.9134e-10
HIF3A	39.4789	32.3213	35.1816	9.97402	10.9262	8.27703	-3.61041	-1.85216	3.41349e-12	7.89499e-10
HSPA6	1.02101	0.316875	1.85166	49.8701	4.64362	31.4527	26.4771	4.72667	4.16064e-12	9.46269e-10
CHORDC1	13.9537	20.28	17.776	93.8297	40.4268	73.8311	3.99899	1.99963	4.7016e-12	1.05177e-09
TNS3	184.121	189.175	115.173	38.6032	65.8302	64.8919	-2.89682	-1.53447	7.24822e-12	1.59531e-09
TNS1	366.541	356.168	250.715	107.867	148.05	112.899	-2.64177	-1.40151	8.91502e-12	1.93102e-09
KCNN2	30.9705	39.6094	19.6276	2.40115	8.46778	4.63514	-5.89586	-2.5597	1.15899e-11	2.47119e-09
CDC42EP2	5.10503	2.85188	0	29.9221	16.6624	20.8581	8.30861	3.05461	1.25045e-11	2.62517e-09
FAP	102.101	86.1901	72.9555	25.1198	19.9403	39.3987	-3.11681	-1.64007	1.43703e-11	2.97117e-09
LRIG3	69.7687	66.5438	54.0686	21.9798	22.3987	24.1689	-2.8065	-1.48877	1.5422e-11	3.14103e-09
ELFN2	31.6512	64.0088	44.4399	10.3434	10.3799	15.8919	-3.86682	-1.95115	1.58972e-11	3.19019e-09
SLC3A2	259.335	254.768	192.943	1180.63	490.858	670.108	3.31198	1.72769	1.67036e-11	3.30343e-09
ANGPTL2	43.5629	42.7782	37.4036	8.12698	17.2087	5.95946	-3.94353	-1.97949	1.73157e-11	3.37557e-09
DDIT3	28.2478	25.9838	28.5156	144.623	48.0752	157.264	4.2259	2.07926	1.83197e-11	3.52099e-09
CPA4	39.1385	32.6382	14.0726	0.369408	5.73624	1.98649	-10.6604	-3.4142	2.0021e-11	3.79453e-09
FTH1	2100.55	2283.72	2022.39	5116.49	4830.73	4981.45	2.32967	1.22013	2.13515e-11	3.99126e-09
POR	57.1763	57.9882	63.6972	212.225	156.244	112.237	2.69469	1.43012	2.31587e-11	4.27059e-09
DYRK3	20.4201	23.7657	25.9233	104.727	45.8899	86.0811	3.37942	1.75678	2.59836e-11	4.72762e-09
GBP1	54.1133	48.7988	20.3683	3.87879	11.7456	6.62162	-5.575	-2.47897	3.20594e-11	5.75634e-09
FICD	5.44536	10.14	5.92532	58.1818	14.7503	68.5338	6.5299	2.70706	3.4216e-11	6.06378e-09
SLITRK6	17.0168	10.14	13.7023	1.47763	1.09262	1.32432	-10.0309	-3.32638	3.55718e-11	6.22324e-09
MAFF	20.7604	21.2306	16.665	163.833	47.2557	65.5541	4.71565	2.23746	4.14628e-11	7.16204e-09
THBS2	122.861	147.664	144.8	53.1948	60.3671	62.2433	-2.38489	-1.25392	5.01384e-11	8.55236e-09
HSPH1	109.248	109.005	88.5095	554.297	208.417	282.743	3.40875	1.76924	6.54427e-11	1.10251e-08
NAMPT	18.3781	24.7163	26.2936	83.3015	45.3436	128.791	3.70228	1.88842	9.9803e-11	1.66087e-08
TOP1	68.067	76.6838	81.4732	198.926	166.897	157.595	2.32543	1.2175	1.25911e-10	2.0701e-08
SOX4	44.5839	46.2638	58.5125	13.8528	18.0282	20.8581	-2.88884	-1.53049	1.83723e-10	2.9495e-08
PIK3IP1	41.1805	28.5188	44.0696	9.41991	10.9262	13.5743	-3.40117	-1.76603	1.82495e-10	2.9495e-08
AKR1B1	98.6972	106.787	101.101	224.415	237.098	245.662	2.29297	1.19722	1.93217e-10	3.06585e-08
DCN	1319.48	1317.25	1570.58	480.969	642.459	689.973	-2.32208	-1.21542	2.09446e-10	3.28517e-08
GMPPB	35.3948	46.8976	30.7376	160.138	63.9181	144.351	3.25544	1.70285	2.16687e-10	3.36013e-08
CDC6	24.5041	21.2306	12.9616	75.7287	41.2463	94.6892	3.59117	1.84445	2.70842e-10	4.15271e-08
TCF21	40.4999	39.9263	27.4046	103.434	73.4785	104.622	2.60279	1.38006	2.84446e-10	4.31283e-08
ATF3	18.7184	17.1113	15.554	147.024	22.1255	138.061	5.96813	2.57728	4.41369e-10	6.6186e-08
DNAJB11	76.9157	72.5645	62.5862	180.271	128.656	194.676	2.37142	1.24575	4.55239e-10	6.75238e-08
UNC5B	65.3443	75.4163	56.6609	173.252	116.91	219.507	2.57648	1.3654	5.79607e-10	8.50465e-08
AGO2	36.7562	44.3626	33.3299	102.511	84.1315	87.0744	2.39397	1.2594	5.96297e-10	8.65645e-08
PTGER2	231.087	238.924	196.276	48.0231	69.9275	116.541	-2.85208	-1.51202	7.1745e-10	1.03056e-07
PBX1	110.609	114.075	109.989	37.8643	54.0846	53.9662	-2.3255	-1.21754	7.4836e-10	1.06376e-07
SHROOM3	30.2898	32.955	20.7386	5.35642	9.01409	9.93244	-3.56489	-1.83386	9.46276e-10	1.33122e-07
HPCAL1	7.48737	8.55563	7.77698	26.228	38.7879	21.5203	3.62083	1.85632	9.92047e-10	1.38137e-07
AREG	2.04201	4.11938	6.66599	21.0563	15.2966	41.7162	6.05204	2.59742	1.00762e-09	1.38889e-07
TCEA3	13.9537	18.3788	18.887	2.21645	4.91678	3.64189	-4.9865	-2.31803	1.06198e-09	1.44917e-07
OXTR	103.462	112.808	21.109	12.1905	20.7597	8.27703	-5.74292	-2.52178	1.12003e-09	1.51327e-07
PLTP	70.109	79.2188	46.6619	22.9033	23.2181	25.1622	-2.76209	-1.46576	1.19243e-09	1.59529e-07
EMP1	129.327	161.606	161.835	351.122	398.532	298.304	2.31605	1.21167	1.2412e-09	1.64442e-07
PLK2	74.5334	83.0213	75.1775	34.7244	34.1443	33.4392	-2.27101	-1.18333	1.33585e-09	1.75278e-07
HERPUD1	138.176	127.067	118.136	759.873	169.902	728.71	4.32506	2.11272	1.46867e-09	1.90871e-07
NPIPB5	49.6889	48.1651	35.9223	153.489	111.72	80.1217	2.58495	1.37014	1.55844e-09	1.98753e-07
MAGED4B	184.121	255.085	188.499	98.4473	94.5114	54.6284	-2.52692	-1.33738	1.5569e-09	1.98753e-07
DNAJB1	98.6972	98.8651	63.3269	701.137	169.083	268.838	4.36545	2.12613	1.60568e-09	2.02881e-07
CRABP2	27.2268	24.3994	10.3693	5.17171	4.09731	1.65541	-5.4734	-2.45244	1.86098e-09	2.32981e-07
TRIM16	95.2938	89.6757	62.2159	167.527	200.222	201.628	2.29498	1.19848	2.07316e-09	2.57185e-07
PTCH1	25.1848	32.955	29.9969	10.1587	7.92147	10.9257	-3.03727	-1.60278	2.13977e-09	2.63057e-07
PCDH7	93.5921	74.4657	72.5852	30.4762	32.7785	38.7365	-2.38739	-1.25543	2.42823e-09	2.95854e-07
IRF1	9.18905	11.0906	9.25831	33.9856	25.4033	38.0743	3.27148	1.70994	2.45286e-09	2.9621e-07
MSC	20.4201	13.6256	7.03632	70.3723	29.7738	61.25	3.91539	1.96916	2.50035e-09	2.96694e-07
SDF2L1	17.0168	21.2306	10.7396	61.1371	34.4174	71.1825	3.38334	1.75845	2.4818e-09	2.96694e-07
TRIM25	82.0207	86.507	61.8455	204.283	187.657	138.392	2.30303	1.20354	2.92794e-09	3.44436e-07
TGIF1	33.6932	27.2513	36.2926	85.1486	65.557	81.7771	2.40497	1.26602	3.06968e-09	3.58025e-07
PDGFRB	529.561	506.05	425.882	156.075	240.649	234.074	-2.32175	-1.21522	3.43904e-09	3.97705e-07
NOX4	15.9957	19.0125	13.7023	3.50938	3.82416	3.64189	-4.46611	-2.15902	3.68914e-09	4.23042e-07
INSIG1	60.2393	66.5438	38.8849	174.915	90.4141	192.027	2.75645	1.46281	4.21292e-09	4.79079e-07
CD109	347.822	395.144	539.945	134.28	192.847	208.25	-2.39953	-1.26275	5.02231e-09	5.664e-07
TMED5	43.2225	47.8482	55.9202	135.388	80.5805	149.98	2.48966	1.31595	5.22213e-09	5.84108e-07
PDE5A	52.4116	44.9963	118.136	16.8081	22.1255	24.1689	-3.42028	-1.77412	5.32724e-09	5.86254e-07
PTGDS	29.2688	48.4819	8.14732	5.91053	3.82416	3.31081	-6.47892	-2.69575	5.31209e-09	5.86254e-07
CHRM2	94.6131	97.5976	107.396	53.0101	39.0611	36.0879	-2.29999	-1.20163	5.68427e-09	6.20541e-07
NTN4	1.02101	1.58438	0.370333	30.2915	16.3893	2.97973	15.9992	3.99993	6.10317e-09	6.60983e-07
EGR1	185.483	297.546	293.674	67.9711	131.66	45.3581	-3.16826	-1.66369	6.54165e-09	7.02892e-07
PDE4D	15.9957	9.18939	8.88798	30.2915	30.8664	55.6216	3.3994	1.76528	6.99632e-09	7.43844e-07
TMEM35A	10.5504	6.97126	11.4803	0.554112	1.91208	0.331081	-10.1623	-3.34515	7.0318e-09	7.43844e-07
EREG	0.340335	1.58438	0.740665	12.5599	8.74094	10.5946	11.5427	3.52891	7.1599e-09	7.51569e-07
FKBP4	61.6006	67.8113	51.8466	187.29	126.47	110.25	2.34291	1.2283	8.46416e-09	8.81694e-07
PTGS1	622.813	690.471	768.07	257.293	278.344	394.649	-2.24051	-1.16383	9.1338e-09	9.44241e-07
MYLK	468.641	460.737	542.537	122.274	255.399	215.865	-2.48287	-1.31201	9.51002e-09	9.75742e-07
FTL	2545.03	2718.79	2427.16	5737.65	5657.03	4577.53	2.07691	1.05444	9.66985e-09	9.84737e-07
NPY4R	15.6554	11.7244	4.44399	1.10822	1.36577	0	-11.7023	-3.54872	9.83173e-09	9.93806e-07
SLC39A14	130.008	126.75	82.9545	468.41	175.092	415.838	3.11722	1.64026	1.01927e-08	1.02272e-06
CA12	119.117	130.236	104.063	41.3737	69.3812	39.7297	-2.35066	-1.23307	1.02991e-08	1.02585e-06
TPM1	757.586	697.126	329.966	270.592	192.027	153.291	-2.8954	-1.53376	1.08393e-08	1.07183e-06
PXYLP1	31.6512	32.0044	30.7376	8.68109	12.8383	12.5811	-2.87451	-1.52332	1.11085e-08	1.08276e-06
FLRT2	7.82771	6.97126	5.55499	23.088	22.6718	26.4865	3.47981	1.79901	1.10673e-08	1.08276e-06
CXXC5	104.143	85.2395	84.8062	36.3867	47.5288	39.0676	-2.24154	-1.16449	1.14105e-08	1.10431e-06
SH3RF3	7.48737	12.0413	7.77698	29.368	23.2181	39.0676	3.30679	1.72543	1.41505e-08	1.35117e-06
TMEM26	9.52938	7.60501	9.99898	0	0.546309	1.98649	-12.9436	-3.69417	1.42583e-08	1.35117e-06
GOT1	32.3318	32.6382	29.9969	74.6205	67.4691	68.8649	2.23212	1.15842	1.42547e-08	1.35117e-06
HSPD1	187.184	190.442	202.942	575.907	322.049	438.02	2.30274	1.20335	1.51222e-08	1.42315e-06
RND3	110.269	120.096	74.4368	395.821	195.852	221.162	2.66708	1.41526	1.60377e-08	1.49898e-06
ACTA2	84.7434	82.7045	80.7325	15.3304	25.4033	46.0203	-2.88499	-1.52857	2.3508e-08	2.18225e-06
PRPS1	107.546	104.886	39.2553	29.368	27.5886	28.1419	-2.9567	-1.56399	2.4153e-08	2.22698e-06
CSGALNACT2	39.8192	49.7494	26.6639	129.478	80.8537	83.7636	2.52886	1.33849	2.52315e-08	2.3108e-06
PAMR1	19.3991	21.2306	24.8123	2.40115	4.37047	9.27027	-4.23933	-2.08384	2.70684e-08	2.4625e-06
SAT1	33.3528	39.6094	39.6256	177.87	52.9919	121.176	3.12798	1.64523	2.75209e-08	2.48709e-06
BRIP1	58.1973	40.8769	25.9233	12.1905	18.0282	8.27703	-3.23246	-1.69263	2.8394e-08	2.54911e-06
UGDH	134.432	137.207	143.319	294.418	287.358	263.872	2.04886	1.03482	3.25678e-08	2.9047e-06
CNN2	381.175	375.497	279.231	148.502	162.8	173.487	-2.142	-1.09896	3.38965e-08	3.00358e-06
NAV3	24.1638	31.3707	27.7749	66.8629	100.794	49.6622	2.60735	1.38258	3.52222e-08	3.10091e-06
TIMP1	1142.84	1223.46	597.346	433.501	437.866	403.588	-2.32452	-1.21693	3.59325e-08	3.14317e-06
ARRB1	7.48737	15.21	6.66599	1.66234	0.546309	0.993244	-8.50133	-3.08769	3.74535e-08	3.25536e-06
DUSP3	31.9915	35.1732	34.0706	117.287	69.9275	66.8784	2.51982	1.33332	4.16837e-08	3.6001e-06
ERO1B	5.10503	3.16875	5.55499	18.8398	13.1114	26.4865	4.20638	2.07258	4.2233e-08	3.6246e-06
AKR1C2	82.7014	104.886	111.84	191.538	251.302	193.351	2.12439	1.08705	4.41469e-08	3.76518e-06
TENT5B	20.0798	14.8931	11.4803	2.21645	5.18993	2.64865	-4.69499	-2.23112	4.59531e-08	3.89488e-06
NDRG4	34.7142	27.885	25.5529	5.91053	13.6577	9.60136	-3.07724	-1.62163	5.16078e-08	4.34716e-06
GPR37	24.1638	23.7657	27.0343	9.60461	5.46309	6.95271	-3.23463	-1.6936	5.43316e-08	4.54852e-06
SEC16B	22.8024	20.9138	34.0706	6.64935	5.46309	10.9257	-3.42636	-1.77668	5.60018e-08	4.65976e-06
SLC7A2	37.7772	44.3626	34.8113	163.278	52.1725	133.426	2.98186	1.57621	5.79071e-08	4.78909e-06
FADS1	177.995	192.66	175.908	340.964	325.873	592.635	2.30197	1.20287	6.28953e-08	5.1703e-06
MR1	14.9747	18.0619	26.2936	5.17171	6.00939	5.2973	-3.57965	-1.83982	6.50232e-08	5.28159e-06
SLC20A1	42.2015	54.5026	33.7003	111.192	98.3355	84.0946	2.24958	1.16965	6.49531e-08	5.28159e-06
CDH18	7.48737	6.02063	12.221	0.184704	1.63893	0.331081	-12.0451	-3.59037	6.89861e-08	5.57032e-06
CDKN1C	17.6974	18.0619	19.998	6.83405	4.37047	3.97297	-3.43852	-1.78179	7.15364e-08	5.74227e-06
TXNIP	280.096	283.603	268.491	72.7734	137.943	147.331	-2.33079	-1.22082	7.40083e-08	5.90595e-06
LAMP3	2.04201	1.2675	2.222	10.7128	8.19463	18.8716	6.69631	2.74337	7.5828e-08	5.98121e-06
GK	39.1385	27.5682	32.5893	85.7027	59.2745	78.1352	2.25403	1.17251	7.56135e-08	5.98121e-06
CCN1	649.019	629.948	331.818	252.675	202.134	103.297	-2.88334	-1.52774	8.08282e-08	6.33897e-06
SEL1L	206.583	192.66	210.719	452.34	326.966	527.081	2.14121	1.09843	8.95578e-08	6.98346e-06
ODC1	33.6932	43.7288	28.8859	115.44	91.7798	58.9325	2.50595	1.32536	9.49639e-08	7.36294e-06
ID1	56.1553	80.1695	69.2522	26.4127	36.0564	23.8378	-2.3811	-1.25163	1.09526e-07	8.44402e-06
UBC	1126.85	1179.09	1241.35	3718.46	1665.97	2672.82	2.27154	1.18367	1.12117e-07	8.59522e-06
HK2	15.9957	11.4075	15.1836	48.2078	24.857	51.9798	2.93704	1.55437	1.16501e-07	8.88139e-06
CTSO	20.0798	21.8644	23.7013	5.35642	8.46778	7.28379	-3.20589	-1.68072	1.27083e-07	9.53487e-06
METTL7A	22.8024	19.6463	52.2169	2.40115	8.46778	10.5946	-4.45657	-2.15593	1.26471e-07	9.53487e-06
CEBPB	80.9997	86.507	73.6962	217.027	131.66	158.257	2.1047	1.07361	1.27169e-07	9.53487e-06
SRSF7	31.3108	34.8563	38.8849	92.7215	69.108	69.5271	2.22028	1.15074	1.39041e-07	1.03681e-05
SEMA3D	10.5504	10.14	8.88798	1.66234	1.91208	2.31757	-5.12557	-2.35771	1.4166e-07	1.0506e-05
ZNF503	58.5376	57.6713	71.4742	16.4387	27.0423	32.777	-2.49358	-1.31822	1.466e-07	1.08135e-05
SLC38A1	217.474	216.109	153.318	571.474	292.275	510.196	2.34059	1.22687	1.56978e-07	1.15168e-05
RBM3	404.658	440.774	583.274	255.261	221.528	216.858	-2.05631	-1.04006	1.66895e-07	1.21789e-05
LAMA1	74.8737	80.1695	66.2895	165.125	134.119	135.081	1.96734	0.976246	1.9104e-07	1.38666e-05
CCBE1	91.2098	90.6264	89.6205	41.9278	52.4456	37.0811	-2.06003	-1.04266	1.96202e-07	1.4166e-05
PDK2	37.7772	48.4819	54.0686	12.0058	24.857	16.8851	-2.63079	-1.3955	2.07118e-07	1.48755e-05
PTX3	42.8822	48.7988	23.331	70.557	105.711	102.966	2.41603	1.27264	2.10432e-07	1.50343e-05
GREM2	6.12603	7.60501	7.40665	0.92352	0.273154	0.662162	-10.1772	-3.34727	2.29799e-07	1.62478e-05
CAMKK1	48.3276	43.4119	33.7003	20.1327	16.1161	13.2432	-2.48321	-1.31221	2.28751e-07	1.62478e-05
ZNF608	41.1805	43.095	61.4752	14.4069	24.3107	20.8581	-2.46682	-1.30265	2.31096e-07	1.62553e-05
COL1A1	33656.4	31390.9	25141.1	9287.29	17044.8	15960.1	-2.13255	-1.09258	2.42893e-07	1.69975e-05
MAFG	78.9577	91.8939	82.5842	299.221	142.587	154.615	2.35604	1.23637	2.46287e-07	1.71471e-05
FMN1	25.1848	18.0619	20.7386	52.456	44.5242	52.973	2.35473	1.23556	2.48903e-07	1.72413e-05
ACTB	5212.91	5688.23	3273.74	1987.97	2724.99	1943.78	-2.12946	-1.09049	2.84151e-07	1.95834e-05
NPTX1	85.0838	94.112	41.1069	15.8846	34.6906	26.1554	-2.88289	-1.52751	2.87206e-07	1.96945e-05
PDGFD	22.1218	19.6463	28.5156	1.84704	3.82416	10.5946	-4.42854	-2.14683	2.90853e-07	1.98449e-05
RNF152	13.9537	12.9919	17.0353	4.6176	3.82416	2.64865	-3.7255	-1.89743	2.97022e-07	2.0165e-05
OSMR	90.1888	85.5563	78.5105	201.697	138.216	165.21	1.99029	0.992979	3.10813e-07	2.09968e-05
ZBTB21	23.1428	21.8644	21.109	56.7042	37.4221	65.8852	2.41317	1.27093	3.13193e-07	2.10534e-05
MFAP4	71.8107	66.2269	48.1432	20.6869	26.7691	32.446	-2.36173	-1.23984	3.25753e-07	2.17903e-05
SIPA1L2	35.3948	34.2225	32.5893	14.0375	8.46778	16.5541	-2.62414	-1.39185	3.41888e-07	2.27581e-05
LBH	105.844	105.836	53.6982	26.7821	34.4174	43.0406	-2.55932	-1.35576	3.45547e-07	2.28899e-05
MRNIP	37.4369	22.4982	35.5519	158.661	66.1033	58.9325	2.97777	1.57423	3.72804e-07	2.45763e-05
DNAJA1	122.861	134.672	102.582	386.955	201.042	223.48	2.25479	1.17299	3.88114e-07	2.54625e-05
gene:ENSG00000288725	18.0378	24.3994	23.7013	0	7.64832	0.993244	-7.62111	-2.93	3.94653e-07	2.57677e-05
LDLR	90.8694	130.553	72.2149	238.268	158.429	257.581	2.22527	1.15398	4.09341e-07	2.65994e-05
ATP1A2	23.8235	10.14	6.66599	1.29293	3.55101	1.32432	-6.55635	-2.71289	4.22546e-07	2.73273e-05
TMTC1	62.2813	61.1569	52.9576	137.605	97.2429	119.851	2.01366	1.00982	4.65638e-07	2.99722e-05
APCDD1L	421.335	452.498	223.311	112.115	205.139	106.939	-2.58679	-1.37116	4.96971e-07	3.18388e-05
ATP2B1	74.5334	79.2188	73.6962	148.502	113.086	230.101	2.15768	1.10948	5.03397e-07	3.20998e-05
CPM	31.6512	23.7657	26.6639	5.72583	7.64832	15.2297	-2.94464	-1.55809	5.13454e-07	3.25888e-05
GLA	19.7394	20.9138	22.9606	56.5195	42.8852	45.027	2.29931	1.2012	5.19617e-07	3.28273e-05
PPP1R15A	148.046	166.36	131.098	929.985	212.241	355.581	3.3623	1.74945	5.45812e-07	3.43233e-05
COL3A1	4279.03	4114.31	4176.61	916.686	2172.12	2217.58	-2.36915	-1.24437	5.64159e-07	3.53143e-05
GCNT1	43.5629	47.2144	38.1443	9.2352	16.9356	23.1757	-2.66088	-1.4119	5.78064e-07	3.60194e-05
GJA1	174.592	182.203	128.876	83.671	81.4	86.0811	-1.93741	-0.95413	5.97893e-07	3.70857e-05
SVIL	31.3108	56.0869	32.5893	84.0404	129.748	72.8379	2.38363	1.25316	6.31135e-07	3.89704e-05
TEF	36.4158	38.9757	22.22	15.1457	9.83355	10.2635	-2.72775	-1.44771	6.99784e-07	4.30146e-05
gene:ENSG00000289517	0	1.58438	0	9.41991	6.00939	7.61487	13.0576	3.70682	7.13115e-07	4.36375e-05
TGFBI	3861.78	3884.26	3359.29	2077.55	1353.75	2187.78	-1.97637	-0.982853	7.78602e-07	4.74321e-05
CD248	362.457	357.752	289.23	107.867	217.977	121.507	-2.25774	-1.17488	7.95101e-07	4.8222e-05
PRICKLE1	29.6091	23.4488	28.1453	6.83405	8.46778	15.2297	-2.74009	-1.45422	8.15039e-07	4.92125e-05
TICAM2	25.5251	27.5682	23.7013	9.60461	9.5604	12.9122	-2.45906	-1.2981	8.39804e-07	5.04844e-05
BAG3	103.122	117.244	105.174	475.798	159.249	230.433	2.65978	1.41131	8.44797e-07	5.05213e-05
ERN1	9.18905	12.9919	11.8506	63.3535	13.9309	45.6892	3.61031	1.85212	8.47821e-07	5.05213e-05
TALDO1	148.726	156.536	149.244	285.183	318.498	259.899	1.90128	0.92697	8.90872e-07	5.28558e-05
SPARC	4462.47	4260.39	3391.14	1859.97	2155.46	2337.1	-1.90747	-0.931658	9.05329e-07	5.32505e-05
GTPBP2	78.2771	87.7745	74.0665	149.61	161.707	147	1.90095	0.926719	9.01471e-07	5.32505e-05
LDB1	179.016	186.64	176.278	86.0721	115.817	78.7973	-1.93028	-0.94881	9.23317e-07	5.40755e-05
PGD	129.327	114.075	106.285	200.404	268.511	213.878	1.94949	0.9631	9.35081e-07	5.42983e-05
ZNF395	69.4283	68.1282	91.8425	39.8961	33.598	38.0743	-2.0417	-1.02977	9.33343e-07	5.42983e-05
RAB43	4.76469	10.14	14.8133	55.4112	11.7456	61.25	4.31459	2.10922	9.85707e-07	5.68839e-05
TMEM41B	14.9747	14.5763	17.0353	39.342	24.857	72.8379	2.92939	1.5506	9.87945e-07	5.68839e-05
OSGIN2	10.5504	11.0906	12.5913	30.8456	22.6718	37.0811	2.6355	1.39808	1.02393e-06	5.87081e-05
TFDP2	70.4493	59.2557	71.4742	30.1068	36.3295	33.1081	-2.03506	-1.02507	1.04071e-06	5.94208e-05
CKS2	30.2898	26.6175	21.8496	50.6089	59.2745	57.6081	2.09169	1.06467	1.06111e-06	6.0333e-05
MXRA8	550.662	515.556	518.836	185.997	361.383	204.608	-2.10844	-1.07618	1.07971e-06	6.03839e-05
FBXO30	36.7562	39.6094	30.7376	82.9321	58.1819	88.7298	2.13942	1.09722	1.06893e-06	6.03839e-05
AHSA1	68.4073	72.8813	58.5125	221.276	106.257	114.885	2.21718	1.14872	1.072e-06	6.03839e-05
SELENOS	59.899	66.5438	54.8092	164.387	81.6731	145.676	2.16126	1.11187	1.07612e-06	6.03839e-05
ABHD4	84.0627	83.972	67.4005	185.812	122.646	160.574	1.99283	0.994822	1.10326e-06	6.14492e-05
HBEGF	3.74369	1.90125	1.111	30.4762	11.4725	4.63514	6.82682	2.77121	1.18033e-06	6.54746e-05
CHML	67.7267	59.8894	56.6609	26.5974	32.2322	31.4527	-2.07782	-1.05507	1.18522e-06	6.54797e-05
CDK17	23.1428	25.35	25.9233	57.0736	57.0892	43.3716	2.14136	1.09853	1.28395e-06	7.06486e-05
FAXDC2	21.1008	13.6256	39.2553	5.54112	9.28725	4.96622	-3.71469	-1.89324	1.33777e-06	7.33139e-05
RNF24	36.0755	52.6013	58.1422	106.574	83.3121	112.237	2.0585	1.04159	1.34971e-06	7.36723e-05
BHLHA15	0.340335	0	0	21.7951	0.819463	25.1622	105.878	6.72626	1.38037e-06	7.47481e-05
gene:ENSG00000254692	14.6344	2.85188	19.2573	0	0	2.97973	-12.4762	-3.64111	1.37722e-06	7.47481e-05
TNS2	137.495	118.195	141.097	41.0043	83.3121	64.8919	-2.10434	-1.07337	1.42045e-06	7.66146e-05
FGF7	20.7604	25.9838	51.4762	8.49639	6.00939	15.5608	-3.28462	-1.71572	1.4455e-06	7.76585e-05
EPHA4	10.5504	12.0413	15.1836	2.03175	4.09731	3.97297	-3.94597	-1.98038	1.46986e-06	7.83503e-05
SERPINB2	8.84871	11.7244	7.77698	36.7561	39.0611	14.2365	3.17509	1.6668	1.46714e-06	7.83503e-05
CTHRC1	424.738	432.218	361.445	120.427	168.809	265.858	-2.19891	-1.13679	1.51616e-06	8.05042e-05
ADAM17	32.3318	27.5682	37.0333	68.7099	52.1725	85.75	2.13012	1.09094	1.52415e-06	8.06145e-05
SYTL2	37.4369	33.5888	26.6639	7.75757	16.1161	13.9054	-2.63724	-1.39903	1.56231e-06	8.23137e-05
SCD	239.256	288.04	163.317	490.205	356.193	768.771	2.33726	1.22482	1.59141e-06	8.35243e-05
FGF2	84.7434	81.1201	69.2522	199.85	101.613	193.02	2.10266	1.07221	1.62875e-06	8.51569e-05
ASPH	425.078	428.415	433.659	744.912	881.469	776.717	1.86579	0.899784	1.63563e-06	8.51901e-05
EYA4	42.8822	45.9469	69.2522	109.16	84.6778	130.777	2.05477	1.03898	1.65051e-06	8.5638e-05
TRAM2	578.91	568.791	458.472	252.121	308.118	291.351	-1.88954	-0.918032	1.67414e-06	8.65354e-05
HEY1	23.1428	28.8357	32.2189	13.2987	6.82886	12.25	-2.56352	-1.35812	1.71099e-06	8.77751e-05
STIP1	128.647	138.475	104.434	342.441	230.815	193.02	2.0642	1.04558	1.70989e-06	8.77751e-05
PKDCC	108.907	101.4	107.026	26.7821	39.3342	69.5271	-2.35375	-1.23496	1.85083e-06	9.42403e-05
BEST1	7.82771	5.07001	5.18466	26.7821	16.9356	14.5676	3.25755	1.70379	1.84806e-06	9.42403e-05
DSEL	341.016	341.909	202.572	138.897	147.23	157.595	-1.99777	-0.998388	1.87965e-06	9.5352e-05
UBE2O	36.0755	31.6875	35.1816	79.6075	64.1913	59.9257	2.00149	1.00107	1.92406e-06	9.72434e-05
NFATC4	77.9367	77.0007	119.247	32.3232	55.1772	40.0608	-2.15297	-1.10633	1.95516e-06	9.84508e-05
ARSI	37.4369	38.025	14.0726	4.98701	13.1114	9.27027	-3.2974	-1.72133	2.02881e-06	0.000101783
FAM162A	34.3738	36.7575	31.4783	13.4834	16.6624	16.5541	-2.25049	-1.17024	2.19451e-06	0.000109369
FRMD6	227.684	240.508	185.166	115.994	125.105	106.277	-1.88024	-0.910919	2.19604e-06	0.000109369
SHB	13.9537	16.4775	7.77698	38.6032	38.7879	24.5	2.65786	1.41026	2.22623e-06	0.000110469
DUSP10	60.5796	53.5519	42.2179	28.6291	19.6671	20.8581	-2.23072	-1.15751	2.24107e-06	0.000110803
LDHA	1157.48	1218.07	1129.88	548.571	770.841	563.831	-1.86184	-0.896729	2.26443e-06	0.000111393
THRA	64.3233	71.6138	64.4379	34.5397	34.1443	34.7635	-1.94087	-0.956701	2.26933e-06	0.000111393
MEST	12.9327	12.9919	3.33299	0.184704	0.546309	2.97973	-8.22295	-3.03966	2.47165e-06	0.000120029
CTSL	106.525	107.421	97.3975	198.003	271.242	149.98	1.98925	0.992224	2.46595e-06	0.000120029
SAMD4A	87.4661	90.9432	74.0665	224.046	141.494	133.757	1.98105	0.986262	2.46287e-06	0.000120029
GSN	236.873	244.311	290.341	106.39	172.36	108.264	-1.99398	-0.995653	2.49103e-06	0.000120541
ALDH3B1	80.3191	69.3957	102.212	39.1573	47.2557	37.0811	-2.03397	-1.0243	2.63289e-06	0.000126956
USP36	48.6679	53.2351	51.4762	142.961	69.3812	109.257	2.09987	1.0703	2.72421e-06	0.000130897
NPC1	42.8822	54.8194	36.2926	167.711	62.2792	98.3311	2.45118	1.29348	2.74688e-06	0.000131522
PLEKHA6	18.3781	13.3088	9.99898	3.69408	3.82416	4.96622	-3.40456	-1.76747	2.89519e-06	0.000138139
ACTG1	4260.31	4675.5	3288.18	2484.45	2074.61	1977.22	-1.86993	-0.902984	2.92787e-06	0.000139211
BIVM-ERCC5	0	2.85188	0	21.241	39.0611	0	20.2364	4.33888	2.9405e-06	0.000139327
SYVN1	80.6594	76.0501	70.3632	211.301	90.9604	193.683	2.18415	1.12707	3.00387e-06	0.000141837
ITPRIP	94.9535	88.7251	61.8455	256.739	111.993	178.784	2.23039	1.15729	3.18151e-06	0.000149707
CA9	9.18905	9.18939	9.99898	2.40115	0.819463	3.31081	-4.33732	-2.1168	3.27958e-06	0.000153791
RRN3	32.3318	37.7082	33.7003	79.6075	55.9966	69.196	1.98059	0.985929	3.2981e-06	0.00015413
EDEM1	63.6426	89.6757	84.4358	160.508	121.827	182.095	1.95134	0.964467	3.40718e-06	0.000158684
SREBF2	106.865	107.421	92.2128	213.333	146.957	226.791	1.91378	0.936428	3.42667e-06	0.000159049
HMBOX1	17.0168	12.675	16.665	42.1125	27.8617	36.0879	2.31012	1.20797	3.52703e-06	0.000162601
PKIG	83.0417	66.8607	51.1059	33.8008	35.5101	22.5135	-2.17533	-1.12123	3.52197e-06	0.000162601
DBP	5.44536	7.28813	3.70333	0.554112	0	0.331081	-15.3276	-3.93806	3.68578e-06	0.000169347
SELENOK	25.1848	24.7163	26.2936	70.1876	35.2369	74.8244	2.36468	1.24165	3.76035e-06	0.000172194
KCNK2	19.0588	20.9138	8.88798	4.6176	6.28255	2.97973	-3.48305	-1.80035	4.1834e-06	0.000190925
AIFM2	19.7394	24.7163	22.22	55.2265	40.7	47.0135	2.15684	1.10892	4.19803e-06	0.000190955
PDLIM7	323.999	283.92	209.608	150.534	155.152	83.1014	-2.09932	-1.06992	4.254e-06	0.000192857
LHFPL2	26.5461	31.0538	23.7013	56.15	46.4362	73.8311	2.15287	1.10626	4.29593e-06	0.000194114
NFKB2	24.1638	27.2513	24.0716	80.531	33.3248	72.5068	2.46837	1.30356	4.32196e-06	0.000194645
PPIF	46.2856	49.4326	34.4409	121.72	79.7611	70.1892	2.09122	1.06434	4.49043e-06	0.000201567
SEL1L3	35.3948	32.6382	19.998	51.9019	74.298	68.5338	2.19581	1.13475	4.51336e-06	0.000201932
IGF2R	354.289	385.32	398.478	783.145	687.529	616.142	1.83637	0.876859	4.67582e-06	0.000208517
CXCL12	8.50838	9.18939	4.44399	0.92352	1.91208	0.662162	-6.27067	-2.64862	4.74092e-06	0.000210731
PACC1	8.50838	5.38688	7.77698	22.9033	20.2134	16.5541	2.83739	1.50457	5.179e-06	0.000229456
ATP6V0B	44.5839	54.1857	43.6992	123.382	74.0248	89.3919	2.0171	1.01228	5.27246e-06	0.000232841
MTHFD2	154.512	160.339	105.174	361.097	186.018	339.358	2.10975	1.07707	5.29277e-06	0.000232984
DUSP5	23.8235	33.2719	22.22	63.7229	51.0799	47.3446	2.0476	1.03393	5.58191e-06	0.000244922
RGPD6	30.9705	30.7369	22.5903	66.4935	46.4362	67.5406	2.13421	1.0937	5.72805e-06	0.000250529
CCN2	1659.47	1963.68	1130.63	490.943	1026.24	727.385	-2.11833	-1.08293	6.31357e-06	0.000274379
COL5A1	3017.41	2706.43	1796.11	1169.73	1395.55	1438.22	-1.87868	-0.909721	6.31205e-06	0.000274379
TPBG	79.6384	80.1695	83.6952	144.808	143.133	142.034	1.76925	0.823134	6.35564e-06	0.000275032
CLCN7	84.4031	83.3382	91.8425	198.372	144.772	134.088	1.8462	0.88456	6.36891e-06	0.000275032
ACSL3	80.9997	98.8651	75.9182	156.26	125.378	205.601	1.89996	0.925967	6.57765e-06	0.000282383
TENT5A	26.8865	27.2513	34.0706	12.5599	12.8383	14.2365	-2.23378	-1.15949	6.58053e-06	0.000282383
SIPA1L3	22.4621	28.5188	26.6639	56.7042	57.6356	42.3784	2.03317	1.02373	7.27154e-06	0.000311058
CHL1	17.3571	12.3581	19.2573	3.50938	1.91208	8.60811	-3.56898	-1.83551	7.48021e-06	0.000318984
KYNU	0.68067	0	0.740665	5.17171	8.46778	4.96622	12.5752	3.65251	7.55938e-06	0.000321356
ITGA2	66.025	79.2188	119.247	115.255	257.585	229.439	2.27581	1.18638	7.85401e-06	0.000332844
CCN5	8.16804	9.82314	1.85166	0.738816	0.819463	0	-11.2903	-3.49702	8.01461e-06	0.000338599
UHRF2	56.8359	57.0376	59.6235	119.504	96.1503	94.6892	1.80389	0.851112	8.1017e-06	0.000341221
RASA4B	10.8907	13.6256	11.8506	4.24819	3.27785	0	-4.55392	-2.18711	8.23389e-06	0.000344662
EVL	43.2225	40.2432	46.6619	21.7951	23.4913	16.223	-2.06772	-1.04804	8.23357e-06	0.000344662
ACADVL	216.113	216.743	225.903	443.659	434.315	330.419	1.83776	0.877948	8.41893e-06	0.000351329
WNT10B	7.48737	3.48563	4.44399	0.184704	0.273154	0.331081	-18.1981	-4.18572	8.53399e-06	0.000355045
ARHGEF28	21.1008	22.815	21.109	52.0866	60.6403	32.777	2.24498	1.1667	8.71123e-06	0.000361317
CALHM5	66.7057	70.3463	67.7709	13.114	37.6953	34.7635	-2.4098	-1.26891	9.20534e-06	0.000380655
FNDC3B	124.903	132.771	104.434	266.528	161.98	264.865	1.91397	0.936565	9.25575e-06	0.000381583
CAVIN3	119.117	121.997	124.802	56.5195	74.5711	73.8311	-1.80662	-0.853292	9.34869e-06	0.000384254
COL1A2	19290.9	17882.5	15888	7424	11131.6	10705.8	-1.81345	-0.858735	9.40893e-06	0.000385568
GPM6B	33.6932	33.5888	36.6629	15.8846	19.9403	14.2365	-2.06771	-1.04803	9.81094e-06	0.000400839
ARHGAP42	28.5881	18.0619	26.6639	9.41991	11.1993	8.93919	-2.46396	-1.30098	9.88414e-06	0.000402624
MAFK	60.5796	42.4613	45.1806	180.825	74.5711	85.0879	2.30108	1.20231	1.00365e-05	0.000407613
HSPA9	315.491	331.769	234.421	728.842	449.885	501.588	1.90623	0.930723	1.01801e-05	0.000412219
PCNA	122.521	135.94	157.762	53.3795	84.1315	87.0744	-1.86226	-0.897058	1.03713e-05	0.000418717
PIR	2.04201	0.950626	0.370333	4.24819	8.46778	11.2568	6.72923	2.75044	1.04637e-05	0.000421201
ITPR1	8.16804	9.50626	13.332	23.2727	19.6671	34.4324	2.48184	1.31141	1.05541e-05	0.000423591
CNN1	43.2225	30.1032	11.4803	9.60461	12.0188	4.63514	-3.20491	-1.68028	1.08992e-05	0.000436159
SH2D5	2.04201	2.21813	0.740665	17.7316	13.9309	2.31757	6.66222	2.736	1.14385e-05	0.000456403
TNFAIP3	9.18905	6.97126	7.40665	40.0808	8.19463	33.1081	3.44819	1.78584	1.22618e-05	0.000487827
RASSF4	21.7814	19.3294	21.109	5.72583	10.1067	8.93919	-2.62354	-1.39151	1.30574e-05	0.000517969
NRXN3	6.8067	7.60501	2.59233	0.92352	0.273154	0.331081	-9.59174	-3.26179	1.35725e-05	0.000536841
SH3RF1	19.0588	24.0825	11.8506	64.8311	29.2275	41.3852	2.461	1.29925	1.37332e-05	0.000541629
ARHGAP26	1.36134	4.43626	2.96266	11.8211	6.82886	19.8649	4.30216	2.10506	1.41428e-05	0.000554576
DNAJA4	3.40335	4.11938	2.59233	24.0115	8.46778	8.60811	4.06174	2.0221	1.41252e-05	0.000554576
CPEB4	20.0798	15.21	15.9243	79.4228	17.755	53.6352	2.9458	1.55866	1.43209e-05	0.000559952
TBL1X	23.1428	25.0332	23.7013	44.5137	52.4456	48.0068	1.99453	0.996051	1.44158e-05	0.00056205
ATP2B4	702.111	699.344	435.141	300.514	399.078	254.933	-1.92399	-0.944101	1.44576e-05	0.000562075
RANGAP1	118.096	118.828	108.137	251.013	215.792	162.561	1.82807	0.870323	1.46371e-05	0.000567436
NOTCH3	185.823	192.66	192.573	98.632	118.276	113.23	-1.7482	-0.805866	1.51467e-05	0.00058553
SLC33A1	40.1595	30.42	31.8486	84.7792	40.9731	127.135	2.46481	1.30148	1.52933e-05	0.000589525
SYNC	159.277	146.713	72.2149	59.6594	72.3859	38.7365	-2.21169	-1.14515	1.54204e-05	0.000592752
PXMP4	18.0378	17.745	14.8133	5.17171	8.19463	6.62162	-2.61562	-1.38715	1.57832e-05	0.000604994
CDK2AP2	25.5251	31.3707	25.9233	72.9581	45.3436	50.9865	2.05294	1.03769	1.59541e-05	0.00060983
SLC2A3	37.7772	50.3832	38.5146	120.242	66.1033	71.8446	2.0426	1.03041	1.69215e-05	0.000645003
SLC7A5	316.171	362.189	118.136	980.779	571.712	495.96	2.57152	1.36262	1.70448e-05	0.000647892
GOLGA4	197.054	193.294	175.538	471.919	234.093	386.041	1.93036	0.948871	1.71188e-05	0.000648898
RAB7B	7.82771	6.97126	6.29565	0.369408	2.45839	1.32432	-5.55335	-2.47336	1.74624e-05	0.00066009
PCBP3	57.857	65.5932	47.7729	23.088	33.3248	31.1216	-1.98364	-0.988149	1.78765e-05	0.000673876
MXD4	187.525	184.421	232.939	124.121	85.2241	124.155	-1.81143	-0.857126	1.81428e-05	0.000682031
PALM2AKAP2	115.374	122.314	75.9182	278.164	196.944	147.662	1.98687	0.990494	1.83125e-05	0.000686516
PTGS2	2.38235	7.28813	3.33299	52.8254	4.37047	16.223	5.60754	2.48737	2.00209e-05	0.000746461
MAP2K6	11.5714	16.7944	27.4046	0.184704	3.0047	7.94595	-5.07437	-2.34323	2.00163e-05	0.000746461
HEXB	79.9787	77.3176	98.1381	147.763	155.152	144.351	1.76055	0.816024	2.01341e-05	0.000748638
TNFRSF19	204.201	174.915	254.418	61.1371	103.252	143.689	-2.06122	-1.0435	2.04456e-05	0.000758154
ITGA10	78.2771	65.2763	107.396	49.6854	43.1584	30.1284	-2.02419	-1.01735	2.08686e-05	0.000771741
OSBPL9	112.991	105.203	115.914	64.277	55.4503	71.1825	-1.75399	-0.810642	2.19024e-05	0.00080344
FN1	86278.7	88542.6	81271.7	54068.8	49370.5	46954.9	-1.70277	-0.767881	2.18821e-05	0.00080344
OSBPL7	18.0378	22.1813	19.6276	6.83405	10.653	5.95946	-2.56674	-1.35994	2.18601e-05	0.00080344
MICALL1	69.4283	68.4451	47.0322	139.452	119.642	89.0609	1.88498	0.914546	2.21165e-05	0.000809121
COL12A1	1859.25	1601.8	1732.05	972.652	1077.05	995.23	-1.70578	-0.770434	2.2285e-05	0.000813104
CPEB2	31.9915	41.5107	38.8849	80.531	56.2698	71.1825	1.8559	0.892116	2.32804e-05	0.000847158
YPEL4	6.8067	4.43626	5.92532	1.10822	0.273154	0.993244	-6.64187	-2.73159	2.36246e-05	0.000857396
LIN7A	59.5586	58.3051	72.5852	30.4762	31.1396	40.0608	-1.89404	-0.921465	2.38227e-05	0.000862294
RAPH1	34.0335	24.0825	22.22	66.4935	36.6027	75.8176	2.22326	1.15268	2.41712e-05	0.000872593
TEAD2	56.1553	47.8482	45.9212	22.3492	31.4127	20.527	-2.01979	-1.0142	2.47462e-05	0.000890995
LOX	641.872	647.059	480.692	336.346	253.487	387.365	-1.81178	-0.857407	2.48662e-05	0.000892958
JUNB	44.9242	43.095	54.4389	30.1068	11.7456	21.5203	-2.22635	-1.15468	2.58181e-05	0.00092471
RGPD5	0	0.316875	0	30.4762	1.91208	0.662162	75.2425	6.23348	2.63674e-05	0.00094191
HSPA8	940.686	1117.94	669.191	2184.31	1315.78	1584.55	1.864	0.898405	2.68369e-05	0.00095618
COL6A3	15287.8	15455.9	16453.5	8697.9	10265.7	8899.46	-1.69394	-0.760382	2.75944e-05	0.000980608
COL11A1	3.06302	3.16875	2.96266	17.3622	18.3013	3.64189	4.26627	2.09298	2.77053e-05	0.000981992
ZFAND2A	9.86972	10.7738	9.62865	43.4055	13.6577	25.8243	2.74526	1.45694	2.8537e-05	0.00100885
KCND1	12.5924	11.7244	11.11	3.69408	2.45839	4.96622	-3.2292	-1.69118	2.87321e-05	0.00101312
MECOM	30.6302	26.6175	32.9596	11.0822	15.5698	16.223	-2.16807	-1.11641	2.95119e-05	0.00103586
SLC6A15	42.5419	47.5313	46.2916	68.5252	102.979	79.7906	1.83569	0.876325	2.95288e-05	0.00103586
GLRX	17.3571	24.0825	28.8859	48.2078	36.6027	68.2027	2.17024	1.11786	2.97041e-05	0.00103934
PVR	53.0923	45.6301	28.5156	134.28	78.3953	63.2365	2.17077	1.1182	3.05482e-05	0.00106614
HMCN1	19.7394	14.8931	15.9243	3.87879	9.5604	4.96622	-2.78762	-1.47903	3.14167e-05	0.00109365
SEC23B	54.4536	51.0169	55.1796	99.9249	70.747	129.453	1.86488	0.899084	3.22168e-05	0.00111865
SLC25A25	13.9537	14.8931	15.554	73.8816	21.5792	28.1419	2.79266	1.48164	3.28837e-05	0.00113891
RMDN2	15.9957	12.3581	16.665	3.69408	4.64362	8.27703	-2.85012	-1.51102	3.29851e-05	0.00113953
LRIG1	33.0125	34.5394	21.8496	47.469	75.1174	59.2635	2.02021	1.0145	3.39725e-05	0.00117068
LURAP1L	38.7982	29.1525	20.3683	75.3593	47.2557	60.9189	2.07798	1.05518	3.44733e-05	0.00118494
STON1	29.9495	29.1525	38.8849	9.97402	18.8476	15.5608	-2.2391	-1.16292	3.47654e-05	0.00118955
CHD1	44.5839	43.4119	41.1069	101.772	58.455	85.75	1.90907	0.932873	3.47816e-05	0.00118955
HEBP1	22.1218	20.28	28.5156	45.2525	49.1678	44.696	1.97464	0.98159	3.58574e-05	0.00122327
ATP8B1	12.9327	15.8438	13.332	41.5584	29.7738	22.8446	2.25653	1.17411	3.7114e-05	0.00126299
EFNB3	8.16804	8.23876	5.92532	1.47763	2.45839	1.65541	-4.06631	-2.02372	3.74184e-05	0.00127018
DLC1	137.155	156.853	90.3611	241.039	253.214	207.919	1.8251	0.867973	3.77975e-05	0.00127813
DRP2	48.6679	35.1732	35.1816	14.961	24.857	16.5541	-2.12264	-1.08586	3.78401e-05	0.00127813
DIXDC1	60.92	59.5726	61.1049	25.3045	35.5101	37.4122	-1.88668	-0.915851	3.80437e-05	0.00127868
MMP2	637.107	671.776	547.352	348.537	372.309	364.189	-1.7133	-0.776781	3.79789e-05	0.00127868
GDF15	5.44536	8.23876	17.4056	33.8008	29.5007	18.2095	2.64103	1.4011	3.84256e-05	0.00128834
FBXL6	12.5924	12.9919	9.25831	44.1443	17.4819	26.1554	2.52542	1.33652	3.97812e-05	0.00133053
TMEM158	1.70168	8.23876	4.44399	9.0505	23.7644	18.2095	3.49358	1.80471	4.0692e-05	0.00135451
CHCHD7	57.1763	60.8401	80.3622	34.355	36.0564	38.0743	-1.83067	-0.872368	4.0697e-05	0.00135451
FOSL1	57.1763	80.8032	52.5872	108.606	171.541	90.7163	1.94389	0.958949	4.10511e-05	0.00136298
SDC3	272.949	244.311	200.72	88.2886	163.073	134.088	-1.8666	-0.900414	4.1465e-05	0.00137338
ZNF202	13.2731	14.8931	11.11	33.062	22.6718	28.8041	2.15865	1.11013	4.15838e-05	0.00137398
ETV1	5.10503	6.65438	19.6276	20.3175	36.0564	33.4392	2.86409	1.51808	4.25388e-05	0.00139998
IL6	0	0	0.740665	3.87879	3.55101	9.93244	21.4342	4.42185	4.2576e-05	0.00139998
MAST4	35.0545	37.7082	52.9576	16.4387	24.3107	21.5203	-2.0333	-1.02382	4.28021e-05	0.00140246
CYP1A1	1.36134	0	0	11.0822	3.82416	2.97973	12.3478	3.62618	4.2857e-05	0.00140246
CFAP251	3.40335	6.02063	3.33299	15.8846	13.9309	9.27027	3.07431	1.62026	4.35238e-05	0.00142087
NR2F2	267.844	260.472	252.196	130.771	176.731	147	-1.72255	-0.784542	4.68107e-05	0.00152453
HSPA13	65.3443	64.0088	50.3652	142.961	65.8302	165.21	2.07905	1.05593	4.77888e-05	0.00155268
PRICKLE2	49.0082	55.1363	49.9949	18.101	28.6812	32.777	-1.97099	-0.97892	4.99157e-05	0.00161793
DPAGT1	34.0335	35.1732	28.8859	62.7994	52.4456	66.8784	1.84642	0.884727	5.01481e-05	0.00162161
MT1X	21.1008	20.9138	36.6629	10.1587	14.204	10.2635	-2.26547	-1.17981	5.03948e-05	0.00162574
WDR62	20.7604	15.8438	17.776	33.6161	55.9966	28.473	2.17127	1.11854	5.14291e-05	0.00165519
IQGAP3	72.4914	62.1076	67.7709	80.1616	233.547	119.52	2.13888	1.09685	5.4916e-05	0.00176325
ABL2	78.2771	77.9513	60.3642	348.906	116.364	91.3784	2.57145	1.36258	5.58509e-05	0.00177612
HSPE1	28.5881	41.1938	32.9596	65.0158	58.455	65.8852	1.8346	0.875469	5.56917e-05	0.00177612
NFKB1	36.0755	34.5394	27.0343	89.3968	44.251	62.9054	2.01647	1.01183	5.59488e-05	0.00177612
LRFN5	11.9117	13.3088	18.5166	3.87879	5.73624	6.95271	-2.73467	-1.45136	5.56363e-05	0.00177612
CEBPG	44.5839	36.1238	24.4419	95.8614	44.251	83.7636	2.12778	1.08935	5.59676e-05	0.00177612
SGTB	23.1428	25.6669	17.776	57.6277	30.047	55.9527	2.15263	1.1061	5.71711e-05	0.00181011
CRACR2B	3.74369	4.75313	3.33299	0.554112	0	0.331081	-10.9822	-3.45709	5.74571e-05	0.0018149
CDRT1	5.10503	5.70376	0.740665	11.2669	17.2087	11.2568	3.36122	1.74899	5.75884e-05	0.0018149
FUS	316.852	313.39	214.052	166.788	155.698	163.223	-1.73888	-0.798162	5.89986e-05	0.00185506
GPRC5A	1.70168	3.48563	0	14.961	10.3799	3.64189	5.43784	2.44303	5.96824e-05	0.00187224
NFIX	137.495	133.405	143.319	59.29	107.076	68.2027	-1.76864	-0.822638	6.29774e-05	0.00197108
CRELD2	42.5419	42.7782	31.4783	65.3853	64.7376	79.1284	1.77057	0.82421	6.42338e-05	0.0020058
LPIN2	54.1133	50.3832	54.0686	100.11	90.1409	81.7771	1.73774	0.797212	6.48167e-05	0.00201938
AZIN1	91.2098	99.8157	92.9535	174.176	125.105	193.351	1.73297	0.793248	6.54151e-05	0.00203338
NR2F1	122.861	111.857	174.797	63.7229	93.9651	75.1554	-1.76009	-0.815653	6.62369e-05	0.00205425
KANK1	8.50838	17.1113	7.03632	32.8773	27.5886	18.8716	2.42149	1.27589	6.68854e-05	0.00206654
MYO18A	170.508	161.923	147.392	69.6334	126.197	61.9122	-1.86167	-0.896596	6.69361e-05	0.00206654
CLIP2	73.172	88.4082	86.6578	166.973	130.021	123.162	1.69972	0.765301	7.01151e-05	0.0021598
MSTO1	40.8402	46.5807	41.8476	92.5368	55.1772	95.3514	1.87912	0.91006	7.22727e-05	0.00222125
SLC16A12	17.0168	13.3088	9.99898	4.06349	5.73624	5.2973	-2.74613	-1.4574	7.32096e-05	0.00224498
SRSF3	109.248	97.2807	134.06	233.651	148.05	220.5	1.77033	0.824015	7.39763e-05	0.00226341
FKBP5	120.819	124.532	164.428	53.5642	60.6403	106.608	-1.86225	-0.897048	7.47257e-05	0.00228122
NPIPB3	23.4831	19.0125	18.1463	56.3347	48.6215	24.8311	2.1504	1.1046	7.51071e-05	0.00228775
JMJD6	25.8655	23.7657	18.5166	64.6464	39.8805	36.75	2.083	1.05867	7.59642e-05	0.0023087
AAK1	99.3778	98.5482	92.9535	186.182	131.114	178.122	1.70419	0.769086	7.64554e-05	0.00231847
RARG	54.1133	46.5807	47.7729	25.3045	26.2228	29.7973	-1.84871	-0.886523	7.72448e-05	0.00233204
GREM1	6275.78	6379.65	5127.25	3143.66	3675.02	3857.76	-1.66594	-0.736332	7.71267e-05	0.00233204
F2R	291.327	308.953	307.006	147.763	207.597	174.149	-1.71787	-0.780617	7.98296e-05	0.00240476
DENND2B	80.3191	78.5851	80.3622	32.5079	52.7188	46.6825	-1.83174	-0.873216	8.05174e-05	0.00242013
SEC14L2	42.2015	39.6094	40.7366	23.2727	16.3893	24.5	-1.89936	-0.925513	8.18601e-05	0.00245508
ABI3BP	236.533	278.217	161.835	127.261	136.577	52.6419	-2.13487	-1.09415	8.28682e-05	0.00247987
BNC2	69.4283	76.0501	66.2895	22.3492	41.5195	47.3446	-1.92184	-0.94249	8.36633e-05	0.00249818
LUM	36.7562	31.0538	41.1069	6.83405	11.4725	25.8243	-2.49806	-1.32081	8.45649e-05	0.00251959
NCOA7	36.7562	32.0044	30.7376	97.1544	46.9825	54.9595	2.00847	1.0061	8.62408e-05	0.00255944
gene:ENSG00000268655	5.10503	4.43626	2.222	0.184704	0.819463	0	-10.9761	-3.45629	8.62775e-05	0.00255944
COQ8A	23.1428	17.4281	31.8486	12.0058	9.5604	9.93244	-2.25638	-1.17401	8.77832e-05	0.00259846
KCNMA1	103.122	121.363	43.6992	41.3737	49.9872	31.7838	-2.17645	-1.12198	8.80819e-05	0.00260166
TXN	180.718	182.52	171.464	267.082	347.179	297.311	1.70123	0.76658	8.87742e-05	0.00261644
RELB	9.52938	4.75313	7.03632	33.9856	6.82886	30.4595	3.33931	1.73955	8.99578e-05	0.00264561
GLIPR2	46.6259	40.8769	19.6276	12.7446	19.9403	15.5608	-2.23172	-1.15816	9.02063e-05	0.00264722
BYSL	9.86972	14.8931	7.03632	23.2727	24.3107	22.8446	2.17076	1.1182	9.23161e-05	0.00270332
PLS3	274.65	268.393	225.162	139.082	180.555	131.108	-1.70486	-0.769656	9.62437e-05	0.00281229
MAP1B	360.074	310.538	255.159	588.283	577.175	424.777	1.71831	0.78099	9.74548e-05	0.0028416
MAP3K5	6.46637	13.3088	13.332	23.2727	26.7691	21.8514	2.1707	1.11816	9.76952e-05	0.00284254
MMP19	57.857	68.1282	57.4015	33.9856	37.9684	31.1216	-1.77937	-0.831364	9.84966e-05	0.00285976
MMP1	1.36134	0.950626	0.370333	10.5281	7.10201	1.65541	6.9841	2.80407	9.91874e-05	0.0028737
SPAG9	105.504	119.779	127.394	264.312	165.805	182.426	1.74071	0.799673	0.000100717	0.00291182
CREB5	16.3361	13.6256	12.221	27.5209	22.3987	43.0406	2.18156	1.12536	0.000102384	0.00295377
PCOLCE	159.617	159.705	187.388	86.0721	120.734	95.0203	-1.68174	-0.749952	0.000105012	0.00302021
CIRBP	215.092	199.631	244.79	129.108	138.762	129.122	-1.65886	-0.730192	0.00010513	0.00302021
CARMIL1	24.1638	22.4982	33.7003	7.94228	8.46778	18.8716	-2.31434	-1.2106	0.000105636	0.00302839
MAN1C1	5.7857	5.38688	3.70333	0.184704	0.273154	1.98649	-7.2315	-2.8543	0.000107176	0.00304988
IFRD1	39.1385	41.1938	39.6256	97.8932	45.0705	99.9865	2.02476	1.01775	0.00010675	0.00304988
DDB2	65.3443	60.8401	129.616	21.7951	49.4409	41.7162	-2.2693	-1.18225	0.00010728	0.00304988
ETV4	3.06302	3.48563	12.221	15.8846	29.5007	13.9054	3.17105	1.66496	0.000106924	0.00304988
ANKRD13A	178.676	149.882	111.1	89.9509	96.9698	60.9189	-1.7702	-0.823913	0.000108136	0.00306784
AUP1	71.4704	78.902	61.1049	152.011	120.461	95.0203	1.74205	0.800785	0.000108732	0.00307197
SPIRE1	43.2225	42.7782	37.4036	108.237	59.2745	69.196	1.92451	0.944493	0.000108653	0.00307197
DDX21	108.567	117.878	95.9161	256.923	132.48	187.061	1.78968	0.839701	0.000110852	0.00312538
FIBCD1	24.5041	29.4694	20.3683	11.2669	14.204	11.9189	-2.02166	-1.01554	0.000114393	0.00321856
DENND3	59.899	67.1776	61.8455	41.9278	32.2322	28.473	-1.80541	-0.852328	0.000114667	0.00321963
OLFML3	25.1848	19.9631	16.665	8.31168	10.9262	7.61487	-2.3079	-1.20658	0.000117737	0.00327577
RBM43	19.0588	18.0619	21.4793	2.95527	7.64832	11.5878	-2.71179	-1.43925	0.000117582	0.00327577
SPEG	81.3401	58.3051	63.3269	29.1832	50.2604	23.8378	-1.96307	-0.97311	0.000117755	0.00327577
EEPD1	13.6134	12.3581	10.3693	5.17171	4.64362	2.31757	-2.81808	-1.49471	0.000117866	0.00327577
FAM3C	39.1385	40.2432	38.5146	68.1558	62.2792	70.8514	1.70349	0.768494	0.000117769	0.00327577
DOP1A	23.4831	25.0332	38.1443	10.5281	16.6624	13.9054	-2.12376	-1.08662	0.000118914	0.00329323
TAF9B	16.3361	16.1606	16.665	3.50938	8.46778	8.27703	-2.53305	-1.34087	0.000118977	0.00329323
C4orf3	57.1763	53.2351	67.0302	26.5974	31.6859	40.0608	-1.8291	-0.871136	0.000119424	0.00329892
ATP11B	47.9872	39.9263	54.8092	90.8744	63.9181	98.6622	1.77817	0.830391	0.000121228	0.00333524
IDH2	118.096	110.59	98.1381	66.8629	66.6496	64.2298	-1.65181	-0.72405	0.000121223	0.00333524
NOP58	44.5839	46.5807	31.4783	91.7979	59.2745	78.1352	1.86836	0.901772	0.000121575	0.00333805
KLC2	53.0923	53.5519	37.7739	92.1673	88.2288	71.1825	1.74378	0.802218	0.0001227	0.00336218
LRP8	49.0082	36.7575	27.7749	68.7099	73.2054	62.5744	1.79806	0.846444	0.000123292	0.00337033
SLITRK5	54.1133	56.7207	114.062	9.41991	27.3154	46.6825	-2.70589	-1.4361	0.000123492	0.00337033
GALNT5	171.189	163.825	236.272	38.049	99.7013	125.149	-2.17715	-1.12244	0.000129087	0.00351602
RTN4RL2	4.76469	6.97126	5.18466	0.738816	1.09262	1.98649	-4.7957	-2.26174	0.000129439	0.00351856
HS3ST3A1	17.0168	18.6956	13.332	33.2467	30.5933	31.7838	1.94246	0.957882	0.000129899	0.00352405
PLPP3	72.8317	98.8651	66.6599	40.6349	39.3342	51.6487	-1.82384	-0.866978	0.00013299	0.00360075
UNKL	44.2436	36.4407	32.5893	66.3088	77.849	55.6216	1.76543	0.820022	0.000133438	0.00360574
SRPRB	66.3653	70.3463	43.3289	130.032	77.3027	121.838	1.82646	0.869051	0.000135114	0.0036438
BICD1	17.3571	18.0619	9.62865	41.7431	24.3107	30.7906	2.14842	1.10327	0.000136619	0.00367714
ZNF550	10.8907	9.82314	8.88798	24.9351	15.5698	27.1487	2.27634	1.18672	0.000137127	0.00368355
PPP1R3C	46.9662	42.4613	43.6992	16.8081	12.8383	33.4392	-2.1303	-1.09106	0.000137542	0.00368743
PHC2	60.2393	62.4244	60.3642	106.574	114.178	82.1081	1.66198	0.732907	0.000138663	0.00370293
NFYB	30.2898	25.0332	27.4046	11.6364	15.5698	15.2297	-1.99942	-0.99958	0.000138543	0.00370293
NFKBIZ	17.6974	27.885	15.9243	70.7417	28.9544	38.4054	2.24722	1.16814	0.000140034	0.00373222
HDAC4	14.2941	17.1113	18.1463	32.3232	29.2275	33.7703	1.92301	0.943369	0.000143544	0.00381832
CDON	10.5504	7.92188	7.03632	1.47763	3.82416	2.97973	-3.28545	-1.71609	0.000144013	0.00382336
AMD1	38.7982	36.7575	29.9969	59.29	52.9919	78.7973	1.79598	0.844769	0.000146108	0.00385736
ABCA1	54.1133	49.4326	86.6578	131.879	120.188	90.3852	1.80673	0.853384	0.000146142	0.00385736
C2CD2L	19.0588	16.4775	18.1463	60.0288	20.4866	41.0541	2.27088	1.18325	0.000145707	0.00385736
ACOT1	9.52938	6.65438	7.40665	1.47763	3.0047	2.97973	-3.3521	-1.74507	0.00014905	0.00392651
SERINC2	12.2521	13.6256	11.8506	25.6739	24.857	23.5068	1.9674	0.976292	0.00015107	0.00397208
ALG2	32.6722	30.1032	29.2563	65.3853	37.9684	74.4933	1.92956	0.94827	0.000152329	0.00399746
TFPI2	22.1218	20.28	9.62865	7.38816	6.82886	6.62162	-2.48987	-1.31607	0.000153054	0.00400878
ETF1	96.6551	108.371	109.248	212.04	136.304	182.426	1.6915	0.758302	0.000153452	0.00401151
CANX	656.506	698.076	713.631	1226.8	929.817	1221.69	1.63364	0.708092	0.000154382	0.00402042
WNT16	8.16804	7.28813	7.03632	0.92352	3.82416	0.662162	-4.19039	-2.06708	0.000154216	0.00402042
IGF2BP2	94.9535	76.367	82.9545	202.251	127.017	117.203	1.76078	0.816211	0.00015495	0.00402753
DDX39A	49.3486	57.0376	42.5882	91.6132	85.4973	75.4865	1.69973	0.765308	0.000158441	0.00411043
MEIS2	33.6932	28.5188	30.3673	12.1905	19.9403	15.2297	-1.98948	-0.992389	0.000162397	0.00420507
CFAP44	19.3991	18.0619	7.77698	4.24819	6.00939	6.62162	-2.73031	-1.44907	0.000164487	0.00425113
IER3	70.4493	87.4576	50.7356	218.874	150.235	71.8446	2.11456	1.08036	0.000165973	0.00427333
DPP9	98.0165	107.421	81.1028	188.029	145.318	140.71	1.65705	0.728619	0.000165965	0.00427333
PLPPR2	58.878	58.3051	46.2916	31.7691	26.7691	34.1014	-1.77389	-0.826913	0.000169525	0.00435657
DDX10	18.7184	17.4281	17.0353	37.6796	27.8617	34.4324	1.89659	0.923407	0.000172433	0.00442297
MAP1LC3B	112.651	95.3795	103.693	248.058	132.207	166.534	1.75727	0.813334	0.000173609	0.00444479
ADM2	28.5881	29.7863	15.554	87.7344	22.945	76.4798	2.52815	1.33808	0.000175736	0.00449081
TIMP3	201.819	221.496	78.8808	58.7359	111.993	35.4257	-2.435	-1.28392	0.00017712	0.00451773
ARID5B	224.621	207.236	219.978	160.508	102.16	123.162	-1.68308	-0.751101	0.000178379	0.00454134
C14orf132	67.046	68.1282	90.3611	30.8456	42.8852	50.3243	-1.83238	-0.87372	0.000180561	0.00458834
KLF12	69.088	65.5932	73.6962	43.4055	28.408	46.6825	-1.75663	-0.812812	0.000181952	0.00461509
G0S2	8.16804	8.87251	2.222	0.738816	0.819463	2.31757	-5.17959	-2.37284	0.000182548	0.00462161
EIF4A2	121.84	135.94	136.653	346.32	148.596	240.696	1.86636	0.900229	0.000183632	0.00463186
SOCS3	21.4411	24.7163	27.4046	9.2352	9.01409	17.5473	-2.10515	-1.07392	0.000183569	0.00463186
MCC	13.2731	11.4075	18.5166	2.95527	6.00939	7.61487	-2.69635	-1.43101	0.0001842	0.00463763
ANGPT1	27.5671	23.7657	36.2926	46.5454	48.6215	69.196	1.87022	0.90321	0.000187117	0.0047024
FAM167A	18.0378	24.3994	15.9243	37.8643	34.6906	39.7297	1.89906	0.925283	0.00019355	0.00483207
CREB3L1	387.301	395.144	272.565	160.693	269.603	160.905	-1.78516	-0.836051	0.000194047	0.00483207
SERPINF1	72.151	91.577	55.9202	47.2842	42.8852	30.7906	-1.80653	-0.853223	0.000193885	0.00483207
TYMS	111.97	103.618	107.396	59.4747	79.7611	53.3041	-1.67561	-0.74469	0.000192922	0.00483207
GYS1	62.2813	79.2188	44.4399	37.4949	35.7832	22.8446	-1.92432	-0.944347	0.000193685	0.00483207
HS1BP3	21.7814	25.6669	25.1826	44.6984	38.5148	49.6622	1.81888	0.863049	0.000197029	0.00489737
STEAP3	141.239	141.326	157.762	78.8686	114.725	59.2635	-1.73873	-0.798035	0.000200395	0.00497199
ZNF117	32.3318	25.35	22.22	6.64935	15.0235	15.5608	-2.18642	-1.12857	0.000201654	0.00498509
DACT3	7.14704	4.11938	8.51765	2.03175	1.36577	0.993244	-4.10311	-2.03672	0.000201406	0.00498509
TAF1D	57.1763	55.7701	50.7356	145.362	50.2604	145.676	2.08454	1.05973	0.000202935	0.00499865
FNDC3A	87.8064	97.5976	85.9172	183.965	105.984	172.162	1.70353	0.768527	0.000202859	0.00499865
PKD1	294.39	272.196	268.861	578.124	360.291	462.52	1.67805	0.746784	0.000204269	0.00501341
NXN	14.9747	16.4775	19.2573	4.6176	7.92147	9.93244	-2.36045	-1.23906	0.000204249	0.00501341
TRAFD1	68.4073	67.8113	87.7688	36.0173	45.6168	47.3446	-1.75025	-0.807559	0.000210715	0.00516234
ANKRD11	296.432	281.702	285.156	683.405	451.524	358.892	1.73185	0.792311	0.000213887	0.00523066
NBPF9	52.0713	44.0457	54.4389	93.645	76.21	78.7973	1.66903	0.739008	0.000215845	0.00526909
JMJD1C	69.088	68.4451	78.8808	187.844	97.7892	101.973	1.79605	0.844825	0.000218583	0.00532639
UAP1	67.7267	74.1488	44.8102	114.886	106.53	97.0068	1.70344	0.76845	0.000222273	0.00540667
RALGPS2	77.5964	74.1488	82.5842	38.6032	51.0799	49.3311	-1.70916	-0.773285	0.00022412	0.00544188
POPDC3	18.3781	19.0125	18.5166	31.7691	36.0564	34.4324	1.80978	0.855817	0.000225002	0.0054536
CHST2	30.6302	47.2144	37.0333	76.8369	48.0752	89.723	1.86407	0.898456	0.000226568	0.00548121
NOL8	39.4789	36.4407	25.5529	69.6334	54.3577	56.946	1.78531	0.836174	0.000226944	0.00548121
KCNJ8	11.5714	7.60501	5.18466	2.58586	1.91208	2.97973	-3.25931	-1.70457	0.000230377	0.00555429
RCC1	44.9242	56.4038	31.8486	119.134	71.0201	63.5676	1.90719	0.931445	0.000231864	0.00557757
gene:ENSG00000285920	2.72268	2.21813	3.33299	8.12698	7.37517	11.5878	3.18364	1.67068	0.00023216	0.00557757
PEG10	161.999	153.051	140.356	64.6464	111.174	94.3582	-1.6923	-0.758987	0.00023296	0.00558696
NPAS2	23.8235	31.0538	14.8133	43.9596	40.7	50.9865	1.92883	0.947729	0.000233446	0.00558877
ZNF316	30.2898	36.4407	29.9969	71.2958	45.8899	56.6149	1.80306	0.850451	0.000238531	0.00569054
SPRY2	17.6974	25.9838	18.5166	37.3102	39.0611	39.0676	1.83037	0.872136	0.000238188	0.00569054
TTLL7	38.4579	35.1732	27.4046	51.5324	60.9134	69.196	1.77583	0.828496	0.000240615	0.00573026
ITGA5	1370.19	1536.53	829.545	766.707	825.472	457.554	-1.82247	-0.865897	0.000242935	0.00577543
BCL9	48.6679	45.6301	48.5136	27.1515	29.5007	22.8446	-1.77528	-0.82805	0.000249704	0.00589525
GLI1	12.9327	12.675	13.332	5.17171	6.82886	2.97973	-2.51993	-1.33339	0.000248656	0.00589525
COL5A3	135.453	124.215	72.5852	72.5887	64.1913	47.0135	-1.80308	-0.850466	0.000249687	0.00589525
APOE	40.8402	77.6345	19.998	22.1645	16.3893	20.527	-2.34295	-1.22833	0.000249638	0.00589525
SDCBP	88.4871	83.972	126.654	185.443	142.313	170.176	1.66866	0.738694	0.000255488	0.00601102
FAM83G	29.9495	31.3707	24.8123	70.1876	48.6215	38.7365	1.83911	0.879009	0.000255309	0.00601102
SDC2	53.4326	40.56	20.3683	21.4257	16.9356	15.8919	-2.09895	-1.06967	0.000255965	0.00601188
OPTN	81.6804	89.9926	80.3622	161.062	122.373	121.507	1.61325	0.689972	0.000258084	0.00605122
FSCN1	566.658	578.931	498.838	301.252	400.717	307.574	-1.62988	-0.704765	0.000263723	0.00617285
LXN	8.84871	6.33751	10.3693	2.40115	4.09731	1.32432	-3.15891	-1.65943	0.000265478	0.00620326
PRDM11	18.0378	13.6256	15.1836	6.83405	5.46309	8.60811	-2.26359	-1.17861	0.000268776	0.00625539
IRS2	87.8064	89.6757	85.9172	259.879	101.34	138.392	1.89912	0.925328	0.000269084	0.00625539
NFKBIB	20.0798	16.1606	16.665	53.3795	22.6718	33.4392	2.07987	1.05649	0.000268422	0.00625539
BRD4	98.0165	86.507	75.5478	197.449	134.119	114.223	1.71801	0.780742	0.000276919	0.00642659
DKK1	60.92	87.7745	20.3683	24.7503	28.6812	9.27027	-2.68775	-1.4264	0.000278101	0.00643223
NUDT4	96.6551	109.005	125.543	73.1428	59.8208	68.2027	-1.63711	-0.71115	0.000278104	0.00643223
ZFP36	30.6302	44.6794	35.1816	24.7503	16.9356	15.2297	-1.90849	-0.932431	0.000278638	0.00643367
FLCN	52.0713	51.3338	64.8082	146.84	102.979	61.25	1.85502	0.891433	0.000281452	0.00648766
OSBPL6	22.8024	15.8438	18.1463	42.2972	28.1349	35.7568	1.88393	0.913744	0.000285253	0.00655754
TARS1	171.529	169.211	119.988	343.365	213.06	233.412	1.71531	0.778468	0.000285445	0.00655754
KCND2	2.72268	2.21813	5.55499	0.184704	0.273154	0.662162	-9.43344	-3.23778	0.000287784	0.00660016
SYNJ2	223.6	202.8	161.835	86.9956	160.342	86.0811	-1.76503	-0.819696	0.000288523	0.00660601
CHURC1-FNTB	6.12603	2.21813	2.222	0	0.273154	0	-30.0461	-4.90911	0.000289135	0.00660894
NFIL3	40.1595	55.1363	76.6588	115.625	69.108	137.399	1.87359	0.905808	0.000290212	0.00662247
KMT5A	39.4789	45.6301	36.2926	77.7604	70.2007	55.9527	1.68872	0.755933	0.000291273	0.00663557
NIPSNAP1	58.878	52.6013	72.5852	33.8008	36.0564	37.0811	-1.72231	-0.784347	0.000294176	0.00669055
FNBP4	92.2308	84.9226	118.136	283.521	137.943	133.426	1.88244	0.912607	0.000294944	0.00669686
DHX34	15.9957	22.815	12.5913	31.0303	39.0611	30.1284	1.93009	0.948668	0.000296778	0.0067273
AKNA	36.0755	30.7369	24.0716	67.6017	40.1537	62.5744	1.87348	0.905723	0.000300597	0.00680257
APPL2	156.894	139.425	141.837	84.9639	103.799	84.0946	-1.60809	-0.685351	0.000304404	0.00687731
MT1E	77.9367	69.7126	82.5842	33.4314	53.8114	45.3581	-1.74869	-0.806272	0.000305192	0.00688372
LEMD2	67.046	69.7126	66.6599	126.522	106.257	96.0136	1.62821	0.703285	0.000307724	0.00692937
FOXK2	48.3276	52.9182	52.5872	98.8167	72.1127	82.4392	1.65688	0.728472	0.000309717	0.00696276
BEX2	0	0.633751	0.740665	3.69408	4.09731	4.63514	8.31051	3.05494	0.00031483	0.00706607
GRB10	42.8822	43.7288	25.1826	89.9509	53.5382	62.5744	1.84411	0.882928	0.00031883	0.00714409
TMEM143	8.16804	7.92188	10.7396	2.58586	3.82416	2.97973	-2.87807	-1.5251	0.000319854	0.0071553
ITGB8	12.5924	10.7738	16.2946	1.66234	6.00939	6.62162	-2.86169	-1.51687	0.000320481	0.00715758
F3	8.16804	10.4569	5.55499	11.6364	22.945	28.1419	2.54669	1.34862	0.000322649	0.00719079
RAI14	140.558	126.433	121.099	268.19	181.374	190.041	1.6517	0.723948	0.000323022	0.00719079
PER3	13.9537	15.21	11.11	6.83405	5.73624	1.32432	-2.77181	-1.47083	0.00032648	0.00724415
MPP2	12.2521	9.50626	12.9616	4.06349	5.73624	2.97973	-2.65904	-1.41091	0.000326164	0.00724415
SLC7A1	132.39	142.911	79.2512	308.641	137.943	234.737	1.9214	0.942158	0.000328048	0.00726711
WHAMM	14.2941	11.0906	14.443	55.7806	17.4819	23.5068	2.44259	1.28841	0.000330603	0.00731184
AKAP17A	64.6637	64.3257	73.6962	175.284	87.4094	97.3379	1.78133	0.832953	0.000332355	0.00733869
SEC11C	16.3361	9.82314	10.7396	22.3492	19.6671	37.0811	2.1244	1.08705	0.000336554	0.00741941
HKDC1	0	0.633751	0	3.87879	6.82886	1.65541	15.9733	3.99759	0.000337792	0.00743469
NEK4	11.9117	11.0906	15.554	27.5209	21.0329	24.1689	1.92906	0.947897	0.000345868	0.00760019
COPZ2	33.3528	31.0538	29.9969	17.9163	14.204	18.2095	-1.86674	-0.900524	0.000347462	0.00762293
DIPK2A	32.6722	27.2513	26.6639	58.7359	41.2463	51.3176	1.75674	0.812901	0.000351582	0.00770093
LARP1B	22.1218	26.3007	27.7749	65.2005	32.2322	48.6689	1.92536	0.945131	0.0003538	0.00772474
TLL1	4.42436	6.65438	2.222	0.92352	0.819463	0	-6.63128	-2.72929	0.00035379	0.00772474
SLC6A9	52.0713	50.0663	25.1826	73.1428	69.6543	94.3582	1.8549	0.891338	0.00036197	0.00788948
GDF6	9.86972	11.4075	6.29565	1.47763	2.18523	5.2973	-3.26516	-1.70715	0.000362502	0.00788948
HID1	0.68067	0	1.85166	7.01876	2.45839	6.62162	6.40205	2.67853	0.000372315	0.00809015
ZFTA	60.92	63.0582	77.3995	40.6349	43.7047	36.75	-1.6486	-0.72124	0.000373213	0.00809677
FAM20C	44.5839	44.0457	32.9596	24.9351	22.3987	20.527	-1.77318	-0.826337	0.000375384	0.00811806
PISD	22.1218	24.3994	23.7013	54.1183	34.4174	37.7433	1.81483	0.859833	0.000375379	0.00811806
NCF2	0.340335	0.316875	1.48133	2.40115	9.83355	3.64189	7.24789	2.85756	0.000377941	0.00816041
SH3D21	53.7729	41.1938	37.7739	23.2727	28.408	23.1757	-1.77867	-0.830797	0.00038099	0.00821325
RIPOR3	6.46637	4.75313	8.14732	1.29293	1.63893	2.64865	-3.61503	-1.85401	0.000382201	0.00822636
CNTNAP3B	25.1848	24.0825	40.3662	14.2222	15.2966	15.8919	-1.97119	-0.979066	0.000388067	0.00833948
MBP	2.38235	3.48563	3.70333	15.8846	12.5651	3.97297	3.41004	1.76979	0.00038921	0.00835089
gene:ENSG00000255872	0	1.90125	1.111	8.49639	3.82416	3.97297	5.29819	2.4055	0.000399187	0.00851142
GAS1	20.0798	29.7863	28.1453	3.13997	5.18993	19.2027	-2.86999	-1.52104	0.000398108	0.00851142
ITPRIPL2	47.9872	56.7207	50.3652	85.7027	70.747	99.6555	1.64422	0.717407	0.000398337	0.00851142
PLCXD1	30.9705	24.0825	33.7003	15.8846	17.2087	12.25	-1.91583	-0.937971	0.000399011	0.00851142
IKZF2	14.6344	14.2594	14.0726	4.06349	7.37517	8.27703	-2.33001	-1.22034	0.000404862	0.00861894
COL5A2	1862.65	1682.93	1799.82	893.968	1291.75	1172.36	-1.59252	-0.671312	0.00040674	0.00864544
CDC42EP3	125.243	137.207	84.0655	59.6594	86.0436	56.6149	-1.71431	-0.777628	0.000422317	0.00895308
TLK1	31.3108	31.0538	35.9223	56.3347	46.1631	68.5338	1.73466	0.794655	0.000422526	0.00895308
FASN	187.865	192.343	157.391	370.516	195.032	373.46	1.74634	0.804337	0.000424778	0.00898685
ZNF512B	80.6594	69.7126	85.1765	43.0361	46.9825	54.2973	-1.64971	-0.722215	0.000426074	0.00900031
TNPO1	230.407	260.155	224.422	429.806	284.627	481.061	1.67135	0.741012	0.000426739	0.00900043
PIANP	18.0378	17.745	17.4056	7.01876	9.5604	9.60136	-2.09648	-1.06797	0.000432593	0.00910383
SSC5D	18.0378	15.21	11.4803	7.75757	5.46309	5.95946	-2.26637	-1.18039	0.000432976	0.00910383
AKIRIN2	36.0755	32.955	34.8113	67.7864	57.9087	49.6622	1.71112	0.77494	0.000441922	0.00927765
STC2	724.573	751.945	445.88	1371.43	910.97	953.514	1.68333	0.751317	0.000443862	0.00930406
NEU1	44.2436	53.2351	54.8092	98.0779	73.7517	77.473	1.64802	0.72073	0.000446101	0.00933665
GFPT1	146.344	161.29	161.095	339.486	158.703	334.723	1.77707	0.829498	0.000450984	0.00942438
MYCBP	11.5714	19.0125	17.4056	4.4329	9.28725	7.28379	-2.33837	-1.22551	0.000458742	0.00957186
ACSS3	7.82771	6.02063	11.8506	1.66234	3.55101	3.64189	-3.00626	-1.58797	0.000467458	0.00973883
SLC39A10	60.2393	62.4244	80.3622	39.342	46.1631	36.4189	-1.6579	-0.729357	0.000468947	0.00974011
ANXA11	163.361	183.154	174.056	115.625	119.095	91.7095	-1.5851	-0.664571	0.000468492	0.00974011
LRATD1	6.12603	9.18939	6.66599	2.21645	3.27785	1.32432	-3.16055	-1.66018	0.000471466	0.00977755
LIG1	66.3653	67.4945	66.6599	41.0043	45.3436	36.75	-1.62089	-0.696787	0.000473365	0.00980203
gene:ENSG00000248710	11.5714	13.6256	5.92532	1.10822	3.27785	5.2973	-3.34728	-1.74299	0.000474787	0.00981659
PREPL	32.3318	39.2925	40.3662	53.9336	53.5382	89.723	1.75126	0.808389	0.00047624	0.00983172
SPART	72.4914	69.3957	64.4379	137.974	87.6825	111.905	1.64017	0.713846	0.000482358	0.00994299
CSDC2	10.2101	7.28813	10.3693	2.77056	4.64362	2.31757	-2.83719	-1.50446	0.00049202	0.0101116
MAGED1	684.073	662.269	649.934	400.623	426.667	447.953	-1.57206	-0.65266	0.000491831	0.0101116
CFL2	121.159	116.293	115.173	67.9711	68.8349	88.7298	-1.58191	-0.661669	0.000493712	0.0101311
PRR16	35.0545	36.7575	42.2179	21.0563	19.6671	25.1622	-1.74591	-0.803979	0.000501113	0.0102675
TPM2	755.203	762.719	619.566	447.723	493.863	400.608	-1.59213	-0.670959	0.000503866	0.010293
COMP	2.72268	4.75313	4.44399	0.738816	0	1.32432	-5.76687	-2.52779	0.000503643	0.010293
CROT	23.1428	21.8644	25.1826	6.83405	14.7503	13.5743	-2.04305	-1.03072	0.000507743	0.0103567
GJC1	41.8612	39.9263	34.8113	60.9524	77.3027	55.6216	1.66032	0.73146	0.000514372	0.0104763
PHLDB2	27.2268	23.4488	9.99898	6.64935	11.4725	6.62162	-2.45883	-1.29797	0.000515709	0.0104879
TP53INP1	58.878	57.0376	131.838	32.1385	31.1396	55.9527	-2.0812	-1.05742	0.000519786	0.010555
SELENOI	28.9285	39.2925	28.1453	65.57	32.7785	98.9933	2.04207	1.03003	0.000522543	0.0105953
COL4A1	3750.83	3625.37	2200.89	1820.44	2201.35	1837.83	-1.6345	-0.70885	0.000532472	0.0107688
APOBEC3C	69.088	64.3257	105.174	20.1327	58.455	38.0743	-2.04965	-1.03538	0.000532679	0.0107688
FOXF2	104.823	92.5276	130.357	66.3088	79.7611	52.3108	-1.64557	-0.718585	0.000534148	0.0107825
NFE2L2	108.907	104.252	99.9898	230.141	126.197	162.892	1.66092	0.731979	0.000540888	0.0109025
EPS8L2	27.2268	34.5394	45.5509	19.0245	24.3107	9.27027	-2.02165	-1.01553	0.000544151	0.010952
ARSJ	139.537	125.166	88.1392	65.2005	85.4973	62.9054	-1.65344	-0.725468	0.00055297	0.0111132
LIMS1	74.193	63.0582	68.5115	158.107	71.5664	130.115	1.75046	0.807735	0.000559218	0.0112222
RNF4	60.92	65.9101	48.1432	105.097	83.0389	95.0203	1.61781	0.69404	0.0005723	0.011451
LAMA4	176.634	171.113	232.199	92.9062	97.5161	157.264	-1.67192	-0.741502	0.000571925	0.011451
MTRR	14.6344	12.0413	14.0726	31.0303	19.1208	28.8041	1.95035	0.96373	0.000573519	0.0114586
SSPN	21.7814	23.7657	21.4793	7.38816	9.83355	15.8919	-2.09764	-1.06877	0.000582971	0.0116304
SLC52A2	78.9577	74.1488	51.8466	153.674	90.9604	103.628	1.70124	0.766584	0.000585351	0.0116508
HELLS	29.9495	22.4982	21.4793	11.4517	16.6624	10.2635	-1.92732	-0.946597	0.000585701	0.0116508
ADGRL2	41.5209	36.1238	36.6629	15.8846	28.1349	19.2027	-1.82438	-0.867409	0.000588234	0.0116827
HSD17B4	57.1763	66.5438	77.3995	91.7979	101.34	138.392	1.64308	0.716404	0.000589869	0.0116827
QSOX2	41.5209	39.9263	26.6639	65.7547	60.3671	57.2771	1.69468	0.761009	0.000589828	0.0116827
FAM214B	64.3233	63.6919	60.7345	41.5584	41.2463	28.1419	-1.67177	-0.741375	0.000591544	0.0116988
HLX	16.3361	15.5269	10.3693	36.3867	27.8617	20.196	2.01157	1.00832	0.000594016	0.0117245
TNFRSF21	47.6469	58.6219	65.9192	17.3622	27.8617	44.3649	-1.9383	-0.954788	0.000594557	0.0117245
POMT2	31.6512	29.7863	21.4793	49.8701	47.802	45.3581	1.72454	0.78621	0.000597033	0.0117563
SLC6A6	104.483	98.8651	170.353	247.319	197.491	181.433	1.67903	0.747627	0.000598176	0.0117618
PCDHGB3	13.2731	5.70376	4.07366	1.29293	1.91208	3.31081	-3.64428	-1.86563	0.000607707	0.0119321
TPTEP2-CSNK1E	6.46637	5.07001	8.14732	3.32467	0	0	-5.4415	-2.44401	0.000610653	0.0119727
ASNS	150.088	173.965	123.321	229.772	230.815	257.25	1.59953	0.677652	0.000614301	0.0120015
ACOT2	28.2478	22.815	23.331	9.0505	12.5651	17.8784	-1.93917	-0.955443	0.000614306	0.0120015
SLFN13	11.2311	8.55563	6.29565	2.40115	3.0047	4.30406	-2.83297	-1.50232	0.000614762	0.0120015
CD59	785.834	890.737	650.304	410.967	633.718	327.77	-1.6953	-0.761538	0.000617234	0.0120325
SLC12A8	5.10503	5.38688	4.07366	9.2352	14.204	13.5743	2.44593	1.29038	0.000618146	0.0120331
TARDBP	84.0627	91.2601	109.248	154.228	133.026	156.27	1.56217	0.643555	0.000620968	0.0120447
CHN1	36.4158	41.1938	47.7729	8.68109	19.394	31.4527	-2.12687	-1.08873	0.000621955	0.0120447
CCPG1	51.3906	57.0376	62.2159	75.1746	83.8584	128.46	1.67779	0.746565	0.000622272	0.0120447
C2CD2	27.2268	19.0125	22.9606	42.1125	41.7926	36.0879	1.75891	0.814684	0.000619922	0.0120447
PDE1C	58.878	53.2351	31.4783	21.6104	28.1349	28.473	-1.84976	-0.88734	0.000631107	0.0121984
VASH1	48.3276	51.0169	39.9959	20.5022	29.7738	30.1284	-1.76596	-0.820451	0.000635029	0.0122569
COL6A1	2488.87	2413.32	2157.56	1458.24	1735.08	1352.47	-1.55298	-0.635042	0.000636539	0.0122687
GIPC3	4.76469	3.16875	2.222	0.92352	0	0	-7.72793	-2.95008	0.000641032	0.0123378
PANK3	66.025	64.9594	64.0675	110.638	75.9369	139.385	1.66823	0.738321	0.000647461	0.0123917
STN1	25.8655	29.1525	35.5519	13.2987	18.0282	18.2095	-1.86291	-0.897559	0.000646509	0.0123917
CTSC	143.621	143.228	95.5458	61.5065	98.8819	68.5338	-1.67355	-0.742908	0.000644992	0.0123917
INHBE	13.6134	14.5763	5.18466	23.088	15.2966	40.3919	2.33836	1.2255	0.00064718	0.0123917
C17orf49	30.2898	27.5682	38.1443	17.3622	18.0282	18.5405	-1.77556	-0.828275	0.000651772	0.0124567
CTNS	17.0168	24.7163	25.9233	44.5137	38.2416	35.7568	1.77268	0.825933	0.000656665	0.0125327
CNNM2	11.2311	10.7738	12.5913	32.3232	14.4772	23.8378	2.05746	1.04086	0.000658463	0.0125494
WFS1	69.7687	62.1076	52.2169	89.7662	91.5067	112.899	1.58625	0.665625	0.000660908	0.0125736
CMBL	28.5881	27.2513	43.6992	14.961	19.394	20.196	-1.83681	-0.8772	0.000661576	0.0125736
SLC19A2	10.5504	9.82314	8.14732	37.4949	10.653	21.1892	2.43812	1.28577	0.000664218	0.0125951
CFD	9.18905	11.0906	2.96266	2.40115	3.0047	0.993244	-3.53487	-1.82166	0.000664554	0.0125951
POLG	76.9157	73.1982	72.9555	146.101	112.266	96.6757	1.59993	0.67801	0.000675	0.0127754
SEMA6D	22.1218	22.4982	28.8859	14.4069	9.5604	14.5676	-1.88149	-0.911875	0.00067659	0.0127877
C1orf109	9.18905	12.675	11.4803	25.3045	14.7503	27.8108	2.02861	1.02049	0.000677844	0.0127937
SGIP1	5.44536	5.07001	5.18466	10.5281	12.0188	15.2297	2.31771	1.2127	0.000685079	0.0129113
F2RL1	14.6344	14.2594	7.77698	4.80231	5.73624	4.63514	-2.43451	-1.28363	0.000685964	0.0129113
HLA-B	157.235	159.071	183.685	104.543	107.35	112.899	-1.543	-0.625741	0.000689509	0.0129423
LOXL1	140.218	122.948	133.69	60.5829	114.178	62.9054	-1.67082	-0.740553	0.000688858	0.0129423
STX3	16.6764	23.7657	22.9606	86.2568	28.408	28.8041	2.26977	1.18255	0.000693449	0.0129805
YJEFN3	4.42436	4.11938	2.59233	10.3434	10.3799	9.27027	2.67044	1.41708	0.000692809	0.0129805
ARHGEF19	14.6344	16.1606	12.9616	7.94228	6.28255	5.2973	-2.15988	-1.11095	0.000695776	0.0130062
BORA	7.14704	5.07001	4.07366	8.49639	10.653	26.1554	2.7319	1.44991	0.000713558	0.0133022
GSPT1	114.693	113.125	92.2128	195.971	145.045	161.899	1.57368	0.654142	0.000713099	0.0133022
AKR1B10	0.68067	0.316875	0	1.66234	8.46778	2.31757	11.0696	3.46853	0.000717474	0.013357
UBQLN4	42.8822	46.5807	39.9959	77.0216	67.4691	64.2298	1.62818	0.703263	0.000718576	0.0133592
STK40	46.2856	39.6094	37.4036	84.0404	56.5429	61.9122	1.65161	0.723874	0.000721646	0.0133981
CHD4	569.04	551.997	515.133	318.984	417.38	306.581	-1.56903	-0.649877	0.000728303	0.0135033
CPT1B	2.04201	1.2675	2.59233	11.2669	4.91678	4.63514	3.61066	1.85226	0.0007301	0.0135182
IRS1	367.562	362.505	275.898	160.877	237.644	224.473	-1.61798	-0.694194	0.000734358	0.0135786
TCF4	68.067	63.3751	60.3642	41.189	40.7	37.0811	-1.60099	-0.678968	0.000735701	0.0135851
LOXL3	34.3738	32.955	26.2936	17.3622	16.1161	19.5338	-1.78752	-0.837956	0.000738504	0.0136184
TUBGCP4	17.6974	24.0825	22.22	36.7561	41.2463	33.7703	1.74674	0.804668	0.000743917	0.0136997
gene:ENSG00000256514	16.3361	24.0825	18.1463	8.12698	12.0188	0.993244	-2.73882	-1.45356	0.000745848	0.0137168
NUMB	65.004	62.4244	89.2501	133.356	95.8772	118.196	1.60913	0.686281	0.000748635	0.0137495
VLDLR	37.7772	34.2225	22.9606	66.1241	55.1772	46.0203	1.76584	0.820354	0.000752236	0.0137971
GOLGA8M	2.04201	0.633751	1.111	2.58586	13.1114	3.97297	5.06799	2.34141	0.000754769	0.0138249
NIPAL3	364.499	368.843	259.603	191.169	251.848	107.601	-1.80214	-0.849712	0.000759223	0.0138263
CISD2	19.7394	19.0125	17.4056	27.5209	29.5007	48.0068	1.84694	0.885138	0.000758122	0.0138263
ZFHX4	123.201	101.4	91.8425	63.7229	80.3074	50.9865	-1.6195	-0.69555	0.000757191	0.0138263
KTN1	208.285	198.998	175.167	356.294	301.562	264.203	1.58586	0.665264	0.000757825	0.0138263
gene:ENSG00000286098	0.340335	2.21813	0	11.2669	1.91208	3.97297	6.36803	2.67085	0.000759911	0.0138263
PNP	20.4201	24.0825	17.4056	50.6089	29.2275	34.1014	1.8487	0.886513	0.000763421	0.0138717
FAM107B	21.4411	25.35	19.2573	55.9653	32.7785	32.777	1.85042	0.887849	0.000764541	0.0138736
IGF2BP3	62.962	76.0501	52.2169	87.365	118.822	102.304	1.60492	0.682501	0.000768101	0.013899
SLC4A8	35.0545	28.2019	26.2936	8.31168	20.7597	15.5608	-2.0312	-1.02233	0.000768995	0.013899
SUMO3	104.483	98.5482	104.063	51.3477	83.0389	57.9392	-1.60109	-0.679052	0.000767464	0.013899
ADGRE5	13.2731	11.7244	17.4056	28.6291	30.3201	20.527	1.90788	0.931967	0.000771016	0.013917
TENT4A	37.0965	31.0538	41.8476	69.8181	59.2745	51.6487	1.66403	0.73468	0.00077448	0.0139427
PLEKHG2	66.3653	72.5645	70.7335	33.062	52.9919	42.0473	-1.64983	-0.722318	0.000774304	0.0139427
EIF4G3	123.201	114.392	121.469	228.11	204.593	140.71	1.60132	0.679261	0.000781551	0.0140514
UBALD2	24.5041	19.0125	27.0343	54.4877	34.6906	35.7568	1.79025	0.840161	0.000786428	0.0141205
SLC25A37	10.8907	18.0619	12.9616	22.7186	31.9591	26.4865	1.90908	0.932875	0.000794095	0.0142395
S100A13	60.5796	64.0088	76.6588	39.342	48.0752	36.4189	-1.61955	-0.695593	0.000802131	0.0143647
CENPJ	49.6889	49.4326	52.2169	73.8816	92.8725	73.169	1.58347	0.663094	0.000804063	0.0143804
TP53I3	40.4999	36.4407	41.8476	21.6104	25.4033	23.8378	-1.68987	-0.756912	0.000821568	0.0146292
ANKRA2	24.8445	27.885	33.3299	14.0375	15.2966	18.5405	-1.83231	-0.873663	0.000822581	0.0146292
OSTM1	18.7184	19.3294	17.0353	36.3867	25.9497	35.4257	1.7784	0.83058	0.000819842	0.0146292
PAPLN	17.0168	11.0906	15.554	5.54112	8.46778	5.95946	-2.20059	-1.13789	0.000823337	0.0146292
PMAIP1	14.6344	12.0413	11.8506	41.189	14.7503	26.4865	2.14859	1.10339	0.000821109	0.0146292
DAZAP1	89.5081	85.2395	69.6225	144.069	130.021	105.946	1.5595	0.641083	0.000824849	0.014637
IRAK2	3.06302	6.02063	7.03632	24.1962	8.19463	10.9257	2.70865	1.43757	0.00082946	0.0146998
VASH2	6.46637	6.97126	5.55499	1.47763	0.819463	3.64189	-3.45236	-1.78758	0.000834255	0.0147656
TSPYL2	92.2308	92.8445	80.3622	239.192	88.7751	151.966	1.80957	0.855647	0.000839271	0.0148351
CAP2	5.10503	5.07001	1.48133	12.3752	8.46778	10.9257	2.68894	1.42704	0.000853964	0.0150753
RNF149	22.1218	20.9138	21.109	41.9278	27.8617	43.3716	1.765	0.819668	0.000866401	0.0152751
TYRO3	23.4831	28.8357	16.2946	60.5829	42.6121	27.8108	1.91378	0.936428	0.000881916	0.0155286
DNAJB5	17.3571	17.4281	23.331	9.97402	10.653	6.29054	-2.07777	-1.05503	0.000885873	0.0155581
NPEPL1	40.1595	42.4613	47.4026	24.1962	29.7738	22.8446	-1.69015	-0.757152	0.000884934	0.0155581
SMAD3	125.584	123.581	112.211	62.7994	99.7013	61.9122	-1.6119	-0.68876	0.000887847	0.0155727
IMPA2	5.44536	4.75313	4.44399	9.60461	12.5651	13.5743	2.34389	1.22891	0.000892318	0.015631
SIM2	52.0713	45.9469	47.7729	111.561	92.053	50.3243	1.74781	0.805552	0.000894958	0.0156572
ZNF436	24.8445	22.815	31.8486	13.8528	14.7503	14.8987	-1.82432	-0.867362	0.000902732	0.0156926
FADS3	63.6426	64.0088	65.9192	107.128	107.896	83.1014	1.55175	0.633897	0.000902711	0.0156926
KRT80	9.18905	5.07001	2.96266	1.29293	2.18523	0.331081	-4.32253	-2.11187	0.000899064	0.0156926
SERPINB8	30.6302	35.49	25.1826	58.7359	41.2463	52.973	1.6749	0.744075	0.000902134	0.0156926
DEDD2	26.2058	29.4694	21.8496	82.7474	30.047	42.0473	2.00216	1.00156	0.000902242	0.0156926
SSH1	101.76	104.569	100.73	183.226	134.665	156.601	1.55007	0.632335	0.000906482	0.0157377
C1orf198	10.8907	6.02063	6.66599	26.7821	13.3846	14.2365	2.32956	1.22006	0.000919745	0.0159477
DGKI	58.878	48.4819	41.8476	37.4949	19.9403	24.8311	-1.79551	-0.844397	0.000922524	0.0159756
NBPF19	43.5629	35.49	38.5146	82.1933	65.0107	48.3379	1.67511	0.74426	0.000931167	0.0161048
ABCF1	89.5081	95.3795	71.4742	175.284	129.475	105.946	1.60534	0.682877	0.000934018	0.0161337
SLC22A4	1.70168	2.535	0.370333	6.83405	4.64362	5.95946	3.67394	1.87733	0.000936422	0.0161515
GSTA4	22.4621	20.28	26.6639	6.09524	13.9309	13.9054	-2.08674	-1.06125	0.000937531	0.0161515
POLR3E	23.1428	24.3994	25.5529	48.0231	34.9637	39.3987	1.6956	0.761795	0.000938601	0.0161515
SMCR8	50.7099	57.3544	57.7719	151.088	68.5617	75.1554	1.78254	0.833932	0.000945934	0.0162572
IDH3A	19.3991	24.0825	18.5166	36.3867	34.6906	37.0811	1.73145	0.791981	0.000952116	0.0163429
CRELD1	16.6764	15.21	17.776	34.9091	29.7738	24.1689	1.82915	0.871173	0.000958152	0.0164102
RSL1D1	97.6761	97.5976	70.7335	168.45	118.549	137.068	1.59517	0.673715	0.000958447	0.0164102
CAMK2N1	71.8107	69.0788	104.434	44.5137	54.3577	52.973	-1.61807	-0.694273	0.000969414	0.0165681
KANK2	322.638	334.62	286.267	134.834	272.062	139.054	-1.72876	-0.789738	0.000970092	0.0165681
CCDC14	221.218	202.8	236.272	90.3203	176.731	135.412	-1.64334	-0.716632	0.000983839	0.016679
PCDHGB5	2.04201	1.90125	2.222	11.0822	13.9309	0.993244	4.19313	2.06803	0.000979716	0.016679
EPHB6	8.16804	8.87251	3.70333	2.40115	2.73154	0.993244	-3.25544	-1.70285	0.000985498	0.016679
DNAJC1	46.2856	45.9469	38.1443	96.0461	49.4409	82.4392	1.74953	0.80697	0.000986364	0.016679
CTSD	209.646	208.821	226.273	346.505	332.702	308.568	1.54118	0.624038	0.000982756	0.016679
FLII	215.092	216.109	193.684	358.141	336.526	276.453	1.55702	0.638791	0.000980825	0.016679
MTCL1	99.0375	91.8939	90.3611	57.8124	70.2007	49.9933	-1.5752	-0.655534	0.000986139	0.016679
PSTPIP2	8.50838	9.82314	12.5913	3.50938	4.09731	4.96622	-2.51263	-1.3292	0.00097925	0.016679
C15orf39	21.7814	21.2306	14.0726	36.7561	31.6859	31.1216	1.75275	0.809621	0.0009876	0.0166792
MGAT2	53.4326	59.8894	46.2916	79.6075	68.8349	122.5	1.68984	0.756886	0.000995193	0.0167867
ADH1B	2.38235	4.75313	5.55499	0.184704	0.273154	1.98649	-5.76494	-2.52731	0.00100216	0.0168832
STK10	38.1175	44.9963	38.5146	65.7547	76.4832	53.9662	1.61572	0.692181	0.00100355	0.0168859
PTGR1	76.235	77.6345	79.9918	112.115	138.489	111.574	1.547	0.629475	0.00100723	0.0169269
POMGNT1	36.4158	44.6794	47.7729	83.1168	73.7517	56.6149	1.66889	0.738888	0.00101244	0.0169935
DCLK2	25.8655	18.0619	17.0353	38.9726	31.1396	36.0879	1.74927	0.806751	0.00101672	0.0170235
OLFM2	6.12603	4.11938	5.18466	1.84704	0.819463	0.993244	-3.79759	-1.92509	0.00101619	0.0170235
EML1	79.9787	77.6345	57.7719	41.9278	49.9872	40.0608	-1.63567	-0.709884	0.00102371	0.0171195
PTPRN	44.2436	53.8688	46.6619	88.8427	60.6403	86.7433	1.63162	0.706301	0.00102753	0.0171398
LRP11	96.3148	106.153	98.8788	57.8124	73.7517	67.2095	-1.5333	-0.616644	0.00102869	0.0171398
SLC25A23	30.6302	28.8357	32.5893	14.0375	19.394	19.5338	-1.79034	-0.84023	0.00102691	0.0171398
DGKE	9.18905	9.82314	8.14732	23.088	12.5651	22.1824	2.12836	1.08974	0.00103855	0.0172829
gene:ENSG00000288698	0	0.633751	0	5.54112	6.5557	0	15.9507	3.99555	0.0010438	0.0173281
ZNF746	27.5671	23.1319	26.2936	41.189	49.9872	39.0676	1.69359	0.760084	0.00104318	0.0173281
ZEB1	62.6216	65.9101	64.8082	88.4733	101.613	109.257	1.531	0.614472	0.00104707	0.0173612
TASOR2	95.6341	95.6964	77.3995	162.909	118.003	138.061	1.56111	0.64257	0.00106069	0.0175657
TIMM23B-AGAP6	8.50838	10.14	11.4803	31.3997	11.4725	23.5068	2.21336	1.14624	0.00106459	0.017609
CSRNP3	3.40335	3.16875	4.44399	0.554112	1.09262	0.662162	-4.71732	-2.23797	0.00106779	0.0176191
PHLPP2	18.3781	23.7657	14.443	42.6666	30.047	28.8041	1.80011	0.848083	0.00106734	0.0176191
ANKRD33B	16.3361	17.745	26.2936	8.12698	9.5604	11.9189	-2.07005	-1.04967	0.00107696	0.0177059
LARP4	30.2898	40.2432	29.9969	63.9076	44.7973	60.9189	1.68529	0.752998	0.0010784	0.0177059
MARS1	158.596	182.203	117.025	300.883	227.264	209.243	1.61131	0.688233	0.00107953	0.0177059
INO80	43.5629	46.2638	37.0333	84.0404	55.1772	68.2027	1.63947	0.71323	0.00107855	0.0177059
RNF185	53.4326	51.6507	57.4015	109.899	62.5523	95.0203	1.65019	0.722636	0.00107648	0.0177059
BHLHE40	11.2311	19.6463	8.14732	45.8066	10.1067	44.3649	2.56086	1.35663	0.00108376	0.0177539
TRIB2	17.3571	17.4281	24.0716	5.72583	7.37517	14.2365	-2.20663	-1.14184	0.00109008	0.0178361
TSC22D2	43.5629	40.8769	28.5156	85.1486	52.9919	54.9595	1.71398	0.777354	0.00109184	0.0178434
COA6	11.5714	9.18939	9.99898	16.0693	22.6718	24.1689	2.00149	1.00107	0.00109774	0.0179128
ASIC1	13.9537	7.28813	6.29565	3.87879	3.55101	1.98649	-2.82073	-1.49607	0.00109871	0.0179128
TENM3	401.255	371.695	351.075	246.026	261.955	216.858	-1.54763	-0.630063	0.00110077	0.0179249
RUBCN	31.6512	26.6175	25.9233	65.2005	42.3389	38.0743	1.74283	0.801431	0.00110322	0.0179434
CTSF	13.2731	12.0413	7.40665	4.06349	4.91678	4.96622	-2.41229	-1.2704	0.00110492	0.0179497
TKT	552.023	559.602	623.64	902.464	921.896	809.825	1.52021	0.604273	0.00110897	0.0179727
TXNDC11	32.3318	51.6507	34.8113	69.264	56.8161	69.8581	1.64376	0.717002	0.00110801	0.0179727
CLIP3	80.6594	92.2107	112.951	62.2453	55.4503	65.223	-1.56047	-0.64198	0.00111035	0.0179738
MCM4	150.768	146.713	102.952	84.4098	98.3355	74.4933	-1.55652	-0.638321	0.0011138	0.0180082
RAB32	27.2268	28.5188	15.9243	50.0548	37.4221	38.4054	1.75623	0.812485	0.00111874	0.0180452
ZNF841	25.5251	16.1606	15.9243	38.049	24.0376	46.3514	1.87654	0.908072	0.00111753	0.0180452
CDR2	49.3486	48.4819	46.2916	114.701	45.8899	98.9933	1.80225	0.849795	0.00112347	0.0180788
NR0B1	0	1.58438	0.740665	5.17171	4.37047	2.97973	5.29839	2.40555	0.00112222	0.0180788
FMO5	3.74369	1.2675	3.70333	0.184704	0.546309	0.331081	-7.88282	-2.97871	0.00112851	0.0181385
PHLDA3	107.886	121.997	138.875	65.9394	90.1409	81.446	-1.55901	-0.640634	0.00113269	0.0181699
MT-CO3	3604.49	3701.1	4344.74	1898.94	2848.45	2739.04	-1.55644	-0.638252	0.00113312	0.0181699
DDR1	65.3443	57.9882	78.5105	43.5902	44.7973	38.0743	-1.57982	-0.659761	0.00113653	0.0182032
KIAA1522	74.8737	64.9594	22.5903	28.2597	29.5007	5.95946	-2.53884	-1.34417	0.00118629	0.0189779
EPB41L1	41.8612	33.2719	39.2553	21.4257	26.2228	19.8649	-1.68797	-0.755291	0.00118913	0.019001
EXOSC6	25.8655	29.4694	27.4046	53.3795	34.1443	55.2906	1.72507	0.786656	0.00120127	0.0191725
ATF2	31.6512	29.1525	30.7376	56.8889	36.6027	59.2635	1.66953	0.739441	0.0012049	0.0191958
CEP170B	109.248	107.421	102.582	198.557	142.313	149.318	1.54088	0.623751	0.00120554	0.0191958
PGK1	560.872	596.676	449.213	361.651	347.999	338.696	-1.53263	-0.61601	0.00120834	0.019218
DGKD	35.3948	31.0538	25.9233	67.417	43.4315	44.696	1.69322	0.759766	0.00121741	0.0193172
CREBRF	20.7604	17.745	20.3683	91.9826	18.5745	30.4595	2.40082	1.26353	0.00121616	0.0193172
SBF1	144.302	142.911	146.281	289.801	205.685	186.068	1.57636	0.656594	0.0012291	0.01948
LRRC49	3.06302	5.07001	7.77698	11.0822	6.28255	30.1284	2.96128	1.56622	0.00123144	0.0194945
UCN2	26.8865	20.9138	11.8506	7.01876	12.0188	8.60811	-2.17722	-1.12249	0.00123491	0.0195041
CORIN	38.1175	28.2019	21.8496	16.9928	17.4819	12.25	-1.86968	-0.902788	0.0012339	0.0195041
ADAM19	68.4073	76.367	32.2189	22.7186	42.8852	25.1622	-1.95377	-0.966258	0.0012402	0.0195651
SESN2	61.2603	64.3257	63.6972	180.271	56.5429	119.52	1.88425	0.913994	0.00124164	0.0195652
LTBP2	1034.62	1024.14	913.981	664.011	719.488	586.676	-1.50808	-0.592715	0.00124315	0.0195663
CTBP2	76.235	71.297	55.9202	115.071	94.7845	106.608	1.5553	0.637193	0.00125696	0.0197609
FAM168A	116.395	107.738	136.282	71.2958	82.4926	82.1081	-1.53354	-0.616867	0.00126271	0.0198285
ST7L	9.18905	6.97126	6.29565	17.9163	12.0188	16.5541	2.08497	1.06003	0.00127257	0.0199485
LTBP3	51.0503	58.3051	61.1049	37.3102	35.7832	28.473	-1.64208	-0.715526	0.00127328	0.0199485
SUFU	30.6302	44.6794	42.9586	21.241	23.2181	26.1554	-1.69339	-0.759915	0.00127741	0.0199903
L2HGDH	8.84871	11.0906	10.3693	3.69408	4.09731	4.96622	-2.43514	-1.284	0.00129634	0.0202633
RFFL	12.5924	19.9631	15.9243	27.5209	31.4127	29.4662	1.79557	0.84444	0.0012995	0.0202895
TMEM170A	7.82771	7.60501	8.88798	17.3622	12.5651	19.8649	2.04202	1.03	0.0013086	0.0204082
CSRP2	35.3948	30.7369	23.331	17.5469	17.755	14.5676	-1.78109	-0.832762	0.00131515	0.0204869
SELENBP1	10.2101	10.4569	10.7396	3.13997	6.28255	3.64189	-2.46751	-1.30305	0.00132805	0.0206511
EIF2AK3	34.3738	40.8769	40.7366	117.472	30.3201	92.3717	2.07145	1.05064	0.00132872	0.0206511
SPOCD1	77.9367	74.7826	65.9192	47.6537	53.2651	28.1419	-1.68352	-0.751479	0.00134316	0.0208519
gene:ENSG00000286112	0	0	1.48133	2.77056	14.204	0	10.9218	3.44914	0.00138874	0.021535
PFKFB4	49.6889	44.3626	29.6266	20.8716	23.4913	27.1487	-1.74898	-0.806513	0.00139083	0.0215429
BCL7A	6.8067	6.97126	11.8506	20.8716	25.4033	10.5946	2.24028	1.16368	0.00139664	0.0216083
TTC8	42.8822	32.6382	47.7729	11.4517	24.0376	30.1284	-1.89711	-0.923803	0.00142785	0.0220661
RLF	15.9957	22.1813	24.0716	41.3737	25.6765	44.696	1.7951	0.844068	0.00143363	0.0221054
PAG1	12.9327	11.7244	12.221	17.5469	26.7691	24.5	1.83282	0.874069	0.00143311	0.0221054
FZD1	33.3528	34.5394	27.7749	14.7763	24.5839	13.5743	-1.81248	-0.857966	0.00143572	0.0221127
RNF19B	12.2521	13.6256	13.7023	38.9726	22.1255	16.8851	1.99086	0.993393	0.00145806	0.0224315
POSTN	825.993	759.233	741.776	551.526	531.558	448.946	-1.51615	-0.600408	0.00147247	0.0226275
ZMYND8	114.353	114.075	73.6962	46.5454	80.5805	56.946	-1.64575	-0.718748	0.0014767	0.022667
ATP6V0D1	62.962	70.0295	57.0312	130.771	81.1268	88.7298	1.58678	0.6661	0.00148082	0.0227047
LRRC15	3.74369	4.43626	2.59233	0.554112	1.36577	0.331081	-4.71648	-2.23771	0.00148534	0.0227486
L3MBTL3	35.7352	31.3707	49.9949	18.4704	28.6812	19.2027	-1.76413	-0.818956	0.00148721	0.0227516
H4C14	1.36134	0	1.111	8.12698	0.819463	6.29054	6.04979	2.59688	0.00151612	0.0231679
STK17B	24.1638	22.815	24.4419	40.6349	35.7832	41.7162	1.65736	0.728887	0.00152786	0.0233212
IRF2BP2	63.6426	64.9594	52.2169	92.1673	81.6731	106.608	1.54117	0.624021	0.00154114	0.0234977
PREB	55.4746	58.6219	49.2542	88.1039	64.7376	112.899	1.6214	0.697243	0.0015429	0.0234982
EPAS1	67.3863	77.0007	62.5862	151.457	72.9322	117.203	1.65197	0.724188	0.00155081	0.0235814
AQP3	7.14704	8.87251	10.7396	3.69408	4.37047	1.65541	-2.60222	-1.37974	0.0015576	0.0235814
SLC48A1	7.48737	7.60501	6.29565	14.2222	17.755	11.9189	2.04866	1.03468	0.00155613	0.0235814
gene:ENSG00000288710	2.04201	0.950626	4.07366	1.66234	22.6718	7.28379	4.43713	2.14963	0.00155201	0.0235814
PUS1	9.18905	10.7738	9.25831	23.088	18.0282	16.223	2.00462	1.00333	0.00155715	0.0235814
SETDB2	24.8445	24.0825	38.8849	14.7763	15.2966	18.2095	-1.82363	-0.866812	0.00155873	0.0235814
GPX8	225.982	252.233	232.569	123.752	143.133	191.034	-1.55846	-0.64012	0.00156242	0.0236086
gene:ENSG00000288640	4.42436	4.43626	3.33299	31.0303	6.00939	4.30406	3.39453	1.76321	0.00156398	0.0236086
SLC35F6	27.9075	28.5188	22.9606	41.9278	43.9778	48.6689	1.66554	0.735993	0.00156977	0.0236697
TIMM44	37.7772	31.6875	31.4783	76.2828	45.8899	48.0068	1.69658	0.762629	0.00158806	0.023919
BMP1	227.684	188.541	156.28	133.541	136.577	97.3379	-1.55486	-0.636782	0.00159773	0.0240303
RAP1GAP2	0	0.316875	0	6.27994	4.37047	0	24.4501	4.61177	0.00159896	0.0240303
TRIM27	65.004	72.5645	59.2532	110.084	84.4047	107.27	1.53223	0.615629	0.00160668	0.0241196
RBFOX2	365.86	345.394	377.739	207.238	282.715	219.507	-1.53611	-0.619284	0.00161541	0.0242241
ELOA	60.2393	71.6138	52.2169	118.395	83.0389	86.4122	1.56731	0.648288	0.00161885	0.024249
PIGA	4.42436	6.33751	9.99898	16.6234	8.74094	23.1757	2.333	1.22219	0.00162329	0.0242888
GSR	79.9787	79.8526	81.1028	108.237	145.045	113.23	1.51825	0.602413	0.00165461	0.0247304
MATN2	16.6764	19.3294	8.51765	4.98701	9.83355	4.30406	-2.334	-1.22281	0.0016566	0.0247329
STOM	96.3148	104.886	158.873	58.5512	74.298	90.7163	-1.61452	-0.691109	0.00166619	0.024849
C4B	2.04201	2.535	2.222	0	0	0.662162	-11.5284	-3.52712	0.001682	0.0250574
MGARP	6.12603	5.07001	4.81432	0.369408	2.45839	1.98649	-3.73214	-1.9	0.00169543	0.02523
NOM1	18.3781	23.4488	22.9606	38.2337	36.8758	32.1149	1.67556	0.744643	0.00170675	0.0253227
gene:ENSG00000277758	26.5461	23.7657	13.332	14.2222	7.10201	7.28379	-2.18264	-1.12608	0.00170723	0.0253227
GPCPD1	16.3361	17.1113	21.8496	37.1255	22.6718	38.4054	1.78103	0.832709	0.00170485	0.0253227
CNTNAP3	18.7184	16.1606	30.7376	9.0505	7.37517	15.2297	-2.09006	-1.06354	0.00171335	0.0253859
SNX7	39.4789	37.3913	35.1816	19.0245	24.0376	26.4865	-1.66348	-0.734208	0.00172358	0.0254821
CCDC8	37.7772	43.095	31.4783	14.4069	26.2228	23.8378	-1.76925	-0.823138	0.00172257	0.0254821
SMO	30.9705	26.6175	17.776	14.7763	12.2919	14.5676	-1.81116	-0.856916	0.00172624	0.0254938
GPC6	58.1973	49.7494	80.7325	26.4127	28.9544	51.9798	-1.76714	-0.82142	0.00173308	0.0255395
MT-ATP8	531.603	558.018	576.237	275.024	355.647	447.622	-1.54731	-0.629765	0.00173179	0.0255395
TMEM237	50.0292	47.2144	41.8476	24.9351	30.3201	31.7838	-1.63884	-0.712675	0.0017365	0.0255624
GAS2L3	10.5504	11.0906	11.8506	15.6998	27.8617	21.8514	1.92928	0.948061	0.00174879	0.0257155
DNAJC22	17.6974	23.7657	23.331	8.12698	14.4772	11.5878	-1.9354	-0.952633	0.0017522	0.0257379
C6orf132	20.7604	25.0332	21.4793	43.0361	30.5933	38.4054	1.67376	0.743096	0.00176773	0.0259381
RANBP2	174.932	157.804	138.504	253.599	211.148	252.615	1.52148	0.605475	0.00177033	0.0259484
RPN1	325.36	335.254	297.377	524.929	427.76	488.345	1.50483	0.5896	0.001775	0.0259889
gene:ENSG00000284057	14.9747	6.97126	11.4803	4.06349	3.0047	6.62162	-2.47706	-1.30863	0.00178366	0.0260876
CEP350	88.4871	77.3176	74.0665	137.974	107.076	116.541	1.51368	0.59806	0.00179845	0.0262561
TNFRSF10B	156.894	153.685	225.533	278.903	249.39	302.608	1.55096	0.633158	0.00179902	0.0262561
ABLIM3	156.894	185.689	172.945	270.407	235.732	270.824	1.50679	0.591479	0.00180946	0.0263803
PYGL	81.3401	72.8813	73.6962	46.5454	56.2698	41.7162	-1.57272	-0.653266	0.00182108	0.0265214
LRRC8C	34.0335	42.1444	28.8859	43.2208	71.0201	63.2365	1.6762	0.745194	0.00183383	0.0266218
CABCOCO1	3.06302	2.535	2.222	0.184704	0	0.993244	-7.24932	-2.85785	0.00183118	0.0266218
WARS1	127.285	155.269	117.766	191.353	189.842	231.095	1.52367	0.607551	0.00183321	0.0266218
RAB31	65.6847	54.1857	86.2875	38.6032	42.3389	48.3379	-1.59846	-0.676682	0.00183911	0.0266701
ZMYM3	71.8107	69.3957	79.6215	31.215	63.0986	33.7703	-1.72619	-0.787595	0.00184935	0.0267901
RHEB	58.5376	63.0582	65.5489	93.4603	86.0436	103.628	1.50619	0.5909	0.00185596	0.0268573
NSMAF	57.5166	60.2063	58.8829	98.0779	72.659	102.304	1.54565	0.62821	0.00186345	0.0269371
ANKRD35	10.5504	7.28813	12.221	3.87879	5.18993	2.64865	-2.48424	-1.3128	0.00186559	0.0269395
CCDC71L	30.6302	34.8563	27.7749	14.961	18.8476	22.5135	-1.71051	-0.774425	0.00187099	0.0269889
HLA-A	161.659	166.36	193.684	117.102	116.364	113.892	-1.49557	-0.580694	0.00187778	0.0270583
SPAG4	5.44536	3.48563	6.66599	0.554112	2.18523	1.65541	-3.76533	-1.91278	0.0018858	0.0271452
SH3TC1	0.68067	0.633751	1.85166	5.54112	3.27785	3.97297	4.23901	2.08373	0.00190222	0.0273431
NPIPB4	9.52938	4.75313	5.18466	18.4704	18.0282	7.94595	2.29971	1.20145	0.00190356	0.0273431
LRP4	31.6512	29.4694	31.4783	17.5469	21.5792	12.9122	-1.74992	-0.807285	0.00190713	0.0273656
PODXL	7.48737	5.70376	2.59233	18.4704	26.496	2.97973	3.0255	1.59717	0.00196176	0.02812
KISS1	3.74369	4.11938	2.59233	0.369408	1.63893	0	-5.11303	-2.35418	0.00196988	0.0281772
PKP4	32.6722	39.6094	22.9606	53.9336	54.6309	49	1.64626	0.719194	0.00196963	0.0281772
KIAA0319	0.340335	0.316875	0.740665	2.77056	3.82416	2.64865	6.29128	2.65335	0.0019769	0.028248
C1QTNF9B	6.12603	5.38688	5.18466	1.47763	2.45839	1.65541	-3.02454	-1.59672	0.00199915	0.028536
ZBTB42	5.44536	8.23876	5.55499	2.40115	2.73154	1.65541	-2.77372	-1.47182	0.00202815	0.0289197
TBC1D2B	44.5839	50.7001	43.6992	79.9769	75.3906	61.9122	1.57551	0.655819	0.00203773	0.0290259
OBSL1	66.025	64.3257	68.1412	37.3102	45.0705	49.6622	-1.53496	-0.618204	0.00207465	0.029521
CNST	17.0168	18.3788	18.887	47.2842	19.6671	33.1081	1.85234	0.889349	0.0020804	0.029572
TRIM34	6.8067	6.33751	5.55499	1.10822	3.82416	1.32432	-3.11348	-1.63853	0.00208965	0.0296609
DYNC1H1	803.191	841.304	769.921	1258.2	1367.96	972.717	1.491	0.576283	0.00209118	0.0296609
gene:ENSG00000264058	7.48737	9.82314	9.25831	2.03175	4.91678	4.30406	-2.53598	-1.34254	0.00209317	0.0296609
HTRA3	44.9242	35.1732	23.7013	51.9019	96.9698	42.3784	1.84009	0.879779	0.00210943	0.0298603
HM13	154.172	173.331	119.617	293.864	169.902	249.966	1.59631	0.67474	0.00211608	0.0299233
CLCN6	45.2646	38.6588	53.3279	94.1991	51.8993	81.7771	1.66534	0.735817	0.00211899	0.0299335
TRIM11	22.1218	23.1319	20.3683	48.9466	27.0423	36.4189	1.7228	0.784753	0.00213814	0.0301727
SH3BP2	79.2981	70.9801	98.5085	59.29	56.2698	42.7095	-1.55724	-0.638993	0.00215391	0.0303012
WWC2	45.6049	43.7288	42.5882	101.033	69.6543	50.3243	1.68367	0.751608	0.00215293	0.0303012
TTC17	118.777	113.441	108.507	178.978	163.619	160.905	1.4863	0.571727	0.00215235	0.0303012
PROS1	10.5504	13.3088	11.4803	4.80231	5.73624	6.62162	-2.12624	-1.08831	0.00219465	0.0308427
AVEN	19.0588	23.4488	17.0353	41.189	33.0517	26.4865	1.70559	0.770268	0.00221864	0.0311477
TPI1	718.788	765.571	701.78	473.951	555.596	425.77	-1.50162	-0.586523	0.00222128	0.0311493
PPP1R12C	93.9325	83.972	75.5478	165.68	116.091	103.96	1.5268	0.610511	0.00222332	0.0311493
KNSTRN	18.7184	19.0125	15.1836	22.5339	40.1537	31.7838	1.76516	0.819798	0.00222636	0.03116
RNF10	140.558	144.495	132.209	271.515	183.56	182.757	1.53209	0.615502	0.00223827	0.0312914
ABHD15	23.1428	27.5682	21.8496	11.0822	17.4819	13.9054	-1.74967	-0.807081	0.00224034	0.0312914
INPP5D	1.02101	0.950626	5.55499	0	0.273154	0	-20.9996	-4.39229	0.00225054	0.0314017
C1R	62.962	74.4657	49.9949	37.4949	39.3342	43.7027	-1.56924	-0.650067	0.00227125	0.031626
ITM2B	132.731	142.594	157.391	87.5497	94.7845	109.588	-1.49295	-0.578161	0.00227079	0.031626
IL6ST	239.256	229.418	244.419	320.462	316.586	451.595	1.52443	0.608271	0.00227868	0.0316971
LACC1	9.86972	13.9425	8.88798	16.9928	17.2087	32.1149	1.99357	0.995358	0.00228331	0.0317292
RNF150	20.0798	23.1319	14.0726	6.09524	6.28255	14.8987	-2.14899	-1.10366	0.00231108	0.0319865
SLC1A1	8.16804	4.11938	1.85166	0.92352	0.819463	1.65541	-4.22161	-2.07779	0.00230436	0.0319865
RSRC2	54.1133	50.7001	48.5136	166.788	60.6403	61.9122	1.89086	0.919045	0.00231355	0.0319865
PALM	4.08402	5.70376	4.07366	1.29293	1.63893	0.993244	-3.46025	-1.79088	0.00231168	0.0319865
ICAM1	3.06302	1.90125	5.55499	12.0058	1.91208	23.5068	3.53669	1.8224	0.00231254	0.0319865
LOXL2	1027.47	1028.58	721.408	678.788	637.815	522.446	-1.50974	-0.594298	0.00237479	0.0327999
GLT8D1	79.9787	86.507	85.5468	46.7301	56.2698	65.223	-1.52061	-0.604652	0.00240795	0.0332244
RCE1	9.86972	9.50626	5.18466	17.7316	13.6577	17.5473	1.97657	0.982998	0.00241101	0.033233
EPHX1	32.3318	29.7863	24.0716	40.0808	66.3765	40.0608	1.69449	0.760848	0.00242057	0.0333087
MYPN	24.8445	27.2513	5.55499	8.12698	10.653	3.64189	-2.55506	-1.35336	0.00242383	0.0333087
IMPACT	38.7982	34.8563	39.6256	16.6234	23.2181	29.1351	-1.67594	-0.744966	0.00242147	0.0333087
ETAA1	30.6302	29.7863	30.7376	10.3434	19.394	21.5203	-1.81497	-0.859945	0.0024466	0.0335879
HS6ST1	128.306	118.511	85.1765	67.0476	78.6684	72.5068	-1.5263	-0.610039	0.00245672	0.0336929
MAGT1	77.5964	87.7745	70.7335	115.44	106.257	135.412	1.50325	0.588083	0.00246746	0.0338061
SLC27A1	21.7814	23.4488	25.5529	12.3752	12.0188	17.5473	-1.73188	-0.792342	0.0024704	0.0338125
BRD1	42.8822	42.7782	42.9586	80.1616	59.0013	57.6081	1.54444	0.627082	0.0024949	0.0341136
WDR43	43.2225	39.2925	33.3299	69.264	49.1678	64.2298	1.57881	0.658835	0.00251331	0.034331
MON1A	7.14704	10.7738	9.99898	19.0245	18.3013	15.8919	1.92717	0.946487	0.00252009	0.0343891
DDRGK1	30.9705	25.9838	32.5893	50.6089	55.4503	37.7433	1.62153	0.697351	0.00252729	0.034453
KCNA7	3.74369	2.85188	1.48133	0	1.09262	0	-7.46159	-2.89948	0.00253144	0.0344751
TMEM200A	5.10503	9.18939	10.7396	16.0693	14.4772	19.8649	1.99314	0.995042	0.00253548	0.0344957
SPRY4	11.5714	15.8438	15.1836	27.3362	26.7691	19.5338	1.75874	0.814538	0.00254034	0.0345146
ASL	50.3696	51.0169	47.4026	31.5844	34.4174	29.1351	-1.56056	-0.642062	0.00254353	0.0345146
RTL8B	20.0798	27.2513	27.0343	10.5281	17.755	14.2365	-1.77804	-0.830291	0.00254446	0.0345146
IRAG1	2.38235	3.48563	1.85166	0.369408	0.273154	0.662162	-5.91315	-2.56393	0.0025678	0.0347966
HGF	15.6554	15.5269	38.5146	1.66234	10.9262	12.9122	-2.75211	-1.46054	0.00257679	0.0348838
CLPTM1L	67.3863	68.4451	66.6599	113.408	98.3355	87.0744	1.48905	0.574392	0.00261397	0.0352931
STK17A	31.3108	31.0538	34.8113	46.9148	50.8067	57.2771	1.57347	0.653948	0.0026221	0.0352931
ZC3H12C	26.8865	38.3419	29.9969	72.2193	28.408	76.1487	1.8545	0.891028	0.00262034	0.0352931
FAM171A2	19.7394	22.1813	18.1463	11.4517	13.1114	4.63514	-2.0132	-1.00949	0.00261744	0.0352931
FERMT1	9.86972	11.7244	7.03632	3.50938	3.82416	5.2973	-2.37213	-1.24619	0.00261369	0.0352931
UTP14A	21.4411	21.5475	12.5913	39.5267	25.4033	32.446	1.75144	0.808538	0.00262254	0.0352931
PTPRU	48.3276	42.7782	34.4409	30.2915	22.6718	23.5068	-1.6213	-0.697155	0.00262822	0.0353347
SLC36A1	26.5461	28.2019	22.22	45.6219	45.3436	33.7703	1.63325	0.707742	0.00263231	0.0353548
MCFD2	164.722	179.035	168.872	263.757	195.032	327.108	1.53159	0.615033	0.00263983	0.035421
CCDC80	1537.63	1437.03	780.661	543.584	1073.5	452.919	-1.81418	-0.85932	0.00264555	0.0354629
ERMAP	35.0545	34.5394	34.0706	20.8716	22.3987	21.8514	-1.60014	-0.678201	0.00265969	0.0356174
MSI2	42.5419	42.7782	48.5136	18.6551	22.3987	37.7433	-1.72054	-0.782864	0.00266451	0.0356469
TLE4	50.7099	50.3832	39.9959	38.049	20.4866	22.5135	-1.72026	-0.782628	0.00267339	0.0357307
FAM120A	156.554	182.52	161.095	269.483	226.172	245.331	1.48341	0.568917	0.00267616	0.0357327
GNPDA1	37.0965	40.8769	49.6246	82.9321	66.3765	50.6554	1.57921	0.659206	0.0026844	0.0358077
PSD	6.46637	6.65438	6.29565	2.58586	2.73154	1.98649	-2.5918	-1.37396	0.00269439	0.0359058
AFTPH	19.3991	18.3788	25.1826	37.6796	27.5886	41.7162	1.7032	0.768249	0.00270805	0.0359665
PBX2	87.8064	83.6551	109.989	52.0866	73.2054	59.2635	-1.52811	-0.61175	0.00270734	0.0359665
GALC	19.7394	20.5969	30.7376	12.7446	12.0188	15.8919	-1.75523	-0.811663	0.00270872	0.0359665
gene:ENSG00000260643	1.70168	1.2675	1.111	4.06349	4.91678	5.95946	3.44902	1.78619	0.00270948	0.0359665
SATB1	19.7394	21.2306	22.22	10.8975	11.1993	13.5743	-1.80087	-0.848693	0.00275059	0.0364768
BRPF3	95.2938	90.9432	88.5095	187.844	102.433	135.743	1.55376	0.635766	0.00277091	0.0366542
PRSS3	10.2101	11.4075	9.25831	5.91053	3.55101	2.31757	-2.39928	-1.2626	0.00276848	0.0366542
GLT8D2	11.2311	10.7738	17.0353	4.6176	3.82416	9.60136	-2.2152	-1.14744	0.00277203	0.0366542
CDKN2C	30.9705	20.28	28.1453	8.8658	17.755	16.8851	-1.85086	-0.888197	0.00277539	0.0366631
OTUD4	46.2856	49.7494	49.2542	76.4675	65.2839	82.1081	1.53729	0.620389	0.00277866	0.0366708
XIAP	38.4579	42.1444	47.4026	73.6969	46.7094	91.0473	1.64996	0.722428	0.00278422	0.0367087
CDV3	155.193	165.409	133.32	252.491	192.574	236.392	1.50115	0.586069	0.00278999	0.0367493
ZNF804A	22.1218	19.0125	17.0353	52.2713	21.0329	33.1081	1.8369	0.877273	0.00279452	0.0367734
HJURP	23.1428	19.6463	24.4419	22.5339	59.8208	41.7162	1.83825	0.878331	0.00280573	0.0368854
UBE2E3	70.4493	71.9307	107.767	46.3607	53.2651	60.9189	-1.56219	-0.643569	0.00282795	0.0370703
ZCCHC8	21.7814	19.6463	22.5903	47.2842	30.047	30.1284	1.69984	0.765401	0.00282267	0.0370703
SIX5	40.4999	39.6094	45.1806	26.228	19.394	32.1149	-1.6199	-0.695905	0.00282722	0.0370703
PDLIM1	80.3191	75.7332	73.6962	48.5772	58.7282	41.7162	-1.53568	-0.618881	0.0028339	0.0370785
TSPOAP1	10.8907	9.18939	8.51765	3.32467	6.00939	2.64865	-2.39424	-1.25957	0.00283401	0.0370785
RABGGTB	30.6302	39.9263	29.9969	78.3145	36.6027	57.9392	1.7217	0.783835	0.00284286	0.0371587
LCNL1	1.02101	1.90125	3.33299	0	0.273154	0	-17.7123	-4.14668	0.00285669	0.0373037
LRRFIP1	99.3778	120.096	87.0282	188.583	136.85	136.737	1.51001	0.594562	0.00286644	0.0373595
GOLGA6L4	20.0798	18.3788	22.22	7.38816	12.0188	13.2432	-1.92652	-0.945998	0.0028642	0.0373595
CRY1	15.9957	18.3788	24.8123	54.4877	25.1302	28.473	1.84012	0.879804	0.00287428	0.037426
MFSD14A	25.5251	31.3707	23.331	49.316	42.6121	38.4054	1.63676	0.710845	0.00288504	0.0374781
gene:ENSG00000287542	7.82771	10.4569	4.44399	3.87879	2.73154	1.65541	-2.62326	-1.39136	0.00288317	0.0374781
CARS1	74.193	93.4782	75.1775	144.254	114.178	104.953	1.50082	0.585754	0.00288652	0.0374781
ATG101	32.3318	37.7082	33.3299	67.0476	39.0611	62.9054	1.63636	0.710486	0.0028906	0.0374954
FRRS1	7.48737	10.7738	13.7023	3.87879	5.73624	4.30406	-2.31114	-1.20861	0.00289648	0.037536
XPOT	374.369	356.802	251.826	525.483	413.556	553.568	1.51768	0.601865	0.00290244	0.0375775
WNK1	233.81	235.755	224.051	406.718	317.132	310.223	1.49416	0.579331	0.00290911	0.0376282
AMMECR1L	40.8402	40.56	42.2179	77.0216	48.8946	65.5541	1.55632	0.638143	0.00296867	0.0383622
CADM3	6.8067	3.8025	5.92532	12.7446	9.5604	12.5811	2.14118	1.09841	0.00299489	0.0385914
ZNF662	8.50838	6.33751	7.03632	1.84704	4.09731	3.31081	-2.49541	-1.31928	0.00299446	0.0385914
MBNL2	53.0923	48.7988	51.8466	104.358	41.5195	134.75	1.824	0.867108	0.00298987	0.0385914
ERBB3	5.10503	2.535	7.03632	1.47763	1.63893	0.662162	-3.60719	-1.85087	0.00300202	0.0386467
ZFAND5	108.907	106.787	99.9898	181.01	121.007	171.169	1.49991	0.58488	0.00300717	0.0386765
ROCK2	167.445	151.466	132.949	256.739	198.31	219.176	1.4941	0.579274	0.00302544	0.0388749
SEMA3B	33.0125	30.42	22.5903	16.0693	19.394	14.5676	-1.72387	-0.785652	0.00304493	0.0390518
LSAMP	5.10503	2.535	2.96266	0	0.819463	1.65541	-4.8589	-2.28063	0.00304454	0.0390518
TUBB4B	234.491	248.43	181.463	254.338	466.548	324.46	1.57208	0.652671	0.00309474	0.0396534
SMG5	110.949	116.293	84.0655	191.908	144.499	133.757	1.51253	0.596963	0.00310956	0.0397022
RGPD1	3.06302	2.85188	5.18466	1.10822	0	1.32432	-4.2663	-2.09299	0.00311019	0.0397022
DUSP1	259.676	274.731	171.094	165.68	125.924	166.534	-1.54045	-0.623351	0.00310588	0.0397022
SALL2	22.4621	20.28	22.9606	6.83405	16.9356	10.5946	-1.93595	-0.95304	0.00310243	0.0397022
WWC3	29.2688	37.7082	38.1443	61.5065	49.7141	52.6419	1.57339	0.653873	0.00311328	0.0397045
ZPR1	37.4369	50.7001	38.5146	90.8744	56.8161	55.6216	1.61108	0.68803	0.00312453	0.0397737
BACE1	201.478	206.603	223.311	146.47	150.508	130.777	-1.46587	-0.551757	0.00312235	0.0397737
GAN	8.50838	9.18939	7.03632	23.088	9.5604	18.5405	2.07373	1.05223	0.00317087	0.0403259
HSPB7	8.84871	8.23876	2.96266	2.95527	2.45839	0.993244	-2.98508	-1.57777	0.00317647	0.0403341
VAC14	53.4326	50.0663	52.2169	96.7849	79.4879	60.5879	1.5322	0.615608	0.00317742	0.0403341
HSPA4	119.458	134.989	102.582	210.932	153.24	169.183	1.49547	0.580603	0.00318686	0.0404162
PALLD	352.247	324.797	279.971	226.447	177.823	235.068	-1.49738	-0.582443	0.00319401	0.0404329
INTS6L	19.0588	18.3788	18.5166	10.1587	9.01409	11.5878	-1.83074	-0.872424	0.0031941	0.0404329
CPEB1	27.2268	23.7657	13.332	8.8658	13.1114	11.9189	-1.92406	-0.944152	0.00321088	0.0406077
KDM7A	8.50838	9.18939	12.5913	30.1068	10.3799	22.8446	2.10218	1.07188	0.00322516	0.0407505
CRLF1	62.2813	63.0582	46.6619	41.0043	17.2087	39.3987	-1.75967	-0.815302	0.00324638	0.0409807
MIA3	142.941	144.495	131.838	267.821	151.054	222.818	1.5317	0.615135	0.00325568	0.04106
UBASH3B	64.3233	62.4244	27.4046	77.9451	97.7892	80.7838	1.66016	0.731322	0.00327221	0.0411545
GGACT	4.76469	4.11938	3.33299	0.554112	1.36577	1.65541	-3.71959	-1.89515	0.00326983	0.0411545
CHAC1	29.2688	29.4694	14.8133	71.4805	20.7597	56.6149	2.02214	1.01588	0.00326898	0.0411545
gene:ENSG00000250264	5.7857	0	0	13.6681	6.00939	4.96622	4.20426	2.07185	0.00328422	0.0412295
ZSWIM8	99.0375	99.4989	123.691	205.576	140.128	138.723	1.5087	0.593303	0.00328323	0.0412295
CITED2	159.617	172.38	188.87	130.771	114.998	105.946	-1.46889	-0.554725	0.0033011	0.0414033
NPIPA9	26.2058	7.60501	74.0665	133.356	86.0436	51.9798	2.5183	1.33245	0.00331542	0.0415448
GBP2	2.04201	2.535	3.33299	0	0.546309	0.993244	-5.91219	-2.56369	0.00332997	0.0416887
NUCB2	74.5334	70.6632	69.2522	108.237	89.0483	123.162	1.49017	0.575477	0.00334771	0.0418724
CLDN15	6.12603	1.58438	4.44399	17.3622	5.73624	9.27027	2.68747	1.42625	0.00335815	0.041889
IGFBP6	70.109	70.9801	57.0312	42.8514	53.2651	21.8514	-1.67253	-0.742035	0.00335824	0.041889
URB1	40.4999	41.8275	37.4036	67.0476	52.9919	61.5811	1.52542	0.609211	0.00335732	0.041889
HR	2.04201	2.21813	2.59233	0.369408	0.273154	0.331081	-6.31886	-2.65966	0.00337047	0.0419265
GAL	11.2311	10.7738	5.92532	5.35642	3.55101	1.65541	-2.50731	-1.32614	0.00336808	0.0419265
SEPTIN6	12.9327	11.7244	10.3693	4.24819	6.5557	6.95271	-2.07408	-1.05247	0.00336647	0.0419265
PRRX1	73.5124	68.4451	84.8062	26.7821	57.9087	51.3176	-1.67575	-0.744808	0.00338482	0.0420284
ABCB6	27.9075	25.6669	35.1816	43.7749	57.6356	40.3919	1.60354	0.681262	0.00338392	0.0420284
E2F4	35.0545	43.7288	34.4409	69.6334	52.9919	53.6352	1.56512	0.646269	0.00339235	0.0420837
CLCC1	31.3108	44.0457	33.3299	50.6089	54.6309	68.2027	1.57859	0.658639	0.00340776	0.0421981
SLC9A3R2	250.146	263.007	177.019	131.694	197.764	101.642	-1.60062	-0.678633	0.00340763	0.0421981
PARM1	0	0	0.370333	1.66234	0.546309	6.62162	19.1551	4.25966	0.00343417	0.0424865
ATXN2L	180.378	179.351	172.205	379.567	214.153	225.135	1.54152	0.624358	0.00351202	0.0434104
SCAF4	36.7562	48.7988	38.8849	85.518	56.5429	53.6352	1.57967	0.659625	0.00351906	0.043458
SLTM	100.058	106.47	76.2885	160.877	132.753	128.128	1.49275	0.577977	0.00353145	0.0435716
GPBP1L1	49.0082	49.1157	56.6609	91.7979	70.4738	69.8581	1.51454	0.598879	0.00355164	0.0437123
ADGRG6	4.42436	5.70376	7.40665	19.0245	18.3013	4.63514	2.41056	1.26937	0.00354869	0.0437123
GOLGA6L9	17.3571	11.4075	14.443	23.8268	26.2228	23.1757	1.70033	0.765812	0.00355246	0.0437123
SRSF4	83.0417	84.2888	91.1018	173.437	108.715	106.277	1.50868	0.59329	0.00356524	0.0437988
MAP2K3	31.3108	35.49	33.3299	107.498	44.5242	35.4257	1.87796	0.909166	0.00356592	0.0437988
TMEM156	0.68067	0.950626	1.111	5.17171	2.45839	3.64189	4.17581	2.06206	0.00357483	0.0438689
TOR4A	46.2856	51.9676	56.6609	100.11	81.1268	57.6081	1.55089	0.633094	0.00359152	0.0439945
MSRB1	21.4411	23.1319	21.109	10.8975	14.7503	14.2365	-1.6967	-0.762735	0.00359078	0.0439945
TENT5C	0	0.316875	1.48133	3.87879	4.64362	1.32432	5.5382	2.46942	0.00359502	0.0439979
PPID	29.2688	26.6175	19.6276	42.8514	31.4127	51.3176	1.65299	0.725079	0.00361233	0.0441701
GCC1	41.5209	43.7288	29.2563	78.3145	41.7926	67.5406	1.6386	0.712464	0.00362274	0.0442577
TAFAZZIN	15.9957	14.5763	15.554	27.1515	28.6812	21.1892	1.6975	0.763412	0.00364915	0.0445405
ATP13A1	57.857	60.5232	54.0686	89.9509	78.9416	86.4122	1.48408	0.569567	0.00369115	0.0450129
TES	62.2813	74.4657	58.8829	114.147	69.6543	116.541	1.53404	0.617334	0.00370121	0.0450952
NSD2	147.025	136.256	133.69	188.583	259.497	174.811	1.49366	0.578852	0.00370899	0.0451095
RRP12	25.5251	25.6669	27.0343	55.7806	32.5054	38.7365	1.63792	0.711865	0.00370812	0.0451095
HES1	2.72268	2.21813	4.81432	23.6421	3.0047	5.62838	3.32826	1.73477	0.00371849	0.0451847
EFEMP2	174.932	172.38	167.02	121.166	128.109	100.318	-1.46158	-0.547532	0.00372314	0.0452011
BMP2K	22.8024	22.815	21.8496	38.4185	30.5933	38.4054	1.5981	0.676362	0.00372674	0.0452045
MVD	23.1428	29.7863	20.7386	39.5267	31.4127	51.3176	1.64483	0.717935	0.00373508	0.0452654
VWCE	7.48737	5.38688	23.7013	4.24819	3.82416	5.62838	-2.65855	-1.41064	0.003752	0.0454072
POLR2A	491.444	505.416	521.058	358.88	390.064	283.406	-1.46799	-0.553839	0.00375343	0.0454072
SV2A	68.4073	66.2269	63.6972	39.7114	48.6215	46.6825	-1.49355	-0.578746	0.0037632	0.045485
SPATA18	17.0168	17.1113	28.8859	5.54112	9.5604	15.5608	-2.08841	-1.06241	0.00376865	0.0455089
C12orf75	168.806	175.232	106.656	99.9249	120.188	65.5541	-1.57605	-0.656313	0.00377184	0.0455089
RSC1A1	0	0	1.85166	5.17171	7.37517	0.331081	6.80416	2.76642	0.00379392	0.0457348
NBPF15	60.2393	65.2763	63.6972	88.8427	103.252	85.0879	1.46355	0.549475	0.00380615	0.0458417
MT-ND6	636.767	608.401	516.984	334.684	482.117	368.825	-1.48723	-0.572624	0.003813	0.0458837
NNAT	6.46637	4.43626	5.18466	1.66234	2.45839	0.993244	-3.03849	-1.60335	0.00381937	0.0459199
VGLL3	70.7897	72.5645	72.5852	54.303	32.5054	49.9933	-1.57169	-0.652319	0.00385015	0.0462493
BBC3	24.8445	32.3213	46.2916	22.1645	18.3013	20.8581	-1.67585	-0.744892	0.00385403	0.0462551
HCN2	16.3361	16.1606	11.8506	11.6364	4.37047	3.31081	-2.21976	-1.15041	0.00387237	0.0464345
NARS1	146.344	134.672	128.505	205.206	186.291	203.284	1.45337	0.539401	0.0038797	0.0464814
LIMK2	30.2898	27.5682	28.5156	22.1645	13.9309	12.25	-1.73592	-0.795701	0.00389261	0.0465952
IL4R	24.8445	28.2019	17.0353	40.4502	34.1443	40.3919	1.62865	0.703675	0.00389926	0.0466339
ATXN1	75.8947	68.4451	63.3269	43.4055	44.251	51.3176	-1.51562	-0.599907	0.00390923	0.0467123
TRO	57.5166	57.9882	66.2895	36.5714	33.8711	49.3311	-1.53356	-0.616884	0.00392691	0.0468824
MCM5	110.609	101.083	63.3269	69.6334	59.8208	40.723	-1.61042	-0.687441	0.00393465	0.0469337
ANAPC15	21.4411	24.7163	27.7749	14.4069	17.2087	11.9189	-1.67769	-0.746476	0.00395513	0.0471368
OXR1	54.4536	53.5519	75.9182	37.6796	41.5195	40.723	-1.53298	-0.616341	0.00396531	0.047217
CTU1	3.06302	4.11938	2.96266	8.68109	7.37517	7.94595	2.35892	1.23813	0.00397128	0.0472469
TMBIM1	92.9115	111.54	91.8425	183.042	143.679	113.892	1.49095	0.576227	0.0039759	0.0472606
MCM3	108.227	103.618	77.3995	79.4228	57.6356	52.6419	-1.51638	-0.600632	0.00398212	0.0472932
STIM1	33.6932	34.8563	39.9959	62.0606	52.9919	49.6622	1.54354	0.626246	0.00400235	0.0474509
CADM1	8.50838	6.97126	9.99898	1.29293	1.91208	6.62162	-2.70466	-1.43545	0.00400006	0.0474509
FRMPD4	12.9327	12.9919	9.99898	17.7316	20.2134	27.4797	1.77351	0.826611	0.00401984	0.0476169
CALHM2	14.9747	22.1813	17.4056	9.60461	12.0188	6.95271	-1.8909	-0.919075	0.00403636	0.0477362
REXO1	39.8192	36.7575	44.4399	89.7662	55.4503	47.6757	1.60448	0.68211	0.0040369	0.0477362
ZDHHC18	37.0965	39.6094	42.9586	80.7157	60.6403	45.6892	1.5751	0.655444	0.00405262	0.0478476
PFDN2	30.6302	37.0744	27.4046	59.8441	42.6121	45.027	1.55816	0.639845	0.00405333	0.0478476
ZFHX3	46.2856	47.2144	34.8113	70.7417	72.1127	51.9798	1.52213	0.606087	0.00406248	0.0479141
MLKL	6.46637	8.23876	6.66599	15.6998	14.4772	10.9257	1.96523	0.9747	0.00407517	0.0480223
GNL3	99.7182	98.5482	91.4721	213.518	90.9604	155.939	1.5906	0.669571	0.00408131	0.0480532
ROR1	19.7394	17.1113	9.99898	3.32467	5.18993	12.5811	-2.27126	-1.18349	0.0040932	0.0481516
OPN3	41.8612	41.5107	39.2553	19.3939	28.1349	31.1216	-1.59388	-0.672547	0.00412037	0.0484294
ZDBF2	19.7394	24.7163	27.0343	39.5267	24.3107	63.5676	1.77589	0.828538	0.00415445	0.048746
IDI1	29.2688	35.49	28.8859	49.316	31.4127	89.3919	1.80962	0.855689	0.00415324	0.048746
TCEAL3	39.4789	40.2432	49.6246	27.5209	28.1349	26.1554	-1.56727	-0.648255	0.00415818	0.0487479
RBM39	192.97	168.895	201.831	383.261	211.968	271.487	1.53957	0.622525	0.00417881	0.0489476
INKA2	18.7184	20.5969	37.0333	10.5281	13.9309	17.8784	-1.81739	-0.861868	0.00424211	0.0495352
EPB41L2	144.642	139.425	135.912	86.2568	116.637	82.1081	-1.4742	-0.559936	0.00423323	0.0495352
TGFB1	149.407	148.615	116.284	106.574	103.252	64.5608	-1.50483	-0.589604	0.00424349	0.0495352
SLC16A2	55.1343	61.1569	31.1079	26.228	35.7832	27.1487	-1.65851	-0.729889	0.00424005	0.0495352
SLC38A4	10.2101	6.97126	18.5166	3.50938	4.64362	7.28379	-2.34557	-1.22994	0.0042503	0.0495723
gene:ENSG00000285589	7.82771	6.02063	5.92532	16.8081	11.7456	10.2635	2.01258	1.00905	0.0042598	0.0496407
KPNA2	113.332	120.096	117.766	100.11	297.738	204.277	1.71287	0.776418	0.00426416	0.0496491
MRGPRF	58.5376	55.1363	40.3662	15.3304	48.3483	17.2162	-1.90661	-0.931011	0.00427699	0.049756
STX1A	6.46637	14.5763	13.7023	35.2785	24.857	10.9257	2.05497	1.03912	0.00429951	0.0499754
AP3D1	224.281	247.797	229.977	424.265	294.46	320.818	1.48286	0.568384	0.00431654	0.0501306
PPRC1	58.1973	59.5726	39.6256	107.313	63.0986	77.1419	1.57484	0.655202	0.00432483	0.0501554
NME4	88.1468	96.9639	86.2875	63.3535	66.3765	51.9798	-1.47984	-0.565446	0.00432602	0.0501554
PRNP	90.8694	95.0626	101.841	150.903	108.442	167.858	1.48394	0.569435	0.00433344	0.0501988
LPCAT2	23.8235	17.745	25.1826	12.1905	15.2966	11.5878	-1.69825	-0.764048	0.00434656	0.0503081
THEM4	24.8445	19.6463	19.2573	9.97402	13.3846	13.9054	-1.76843	-0.822471	0.00436133	0.0504361
TMTC4	22.8024	27.5682	20.3683	11.8211	17.4819	13.5743	-1.68315	-0.751168	0.00439213	0.0507493
MEX3C	51.7309	50.0663	55.5499	99.9249	53.2651	93.3649	1.56913	0.649967	0.00440179	0.050798
KLF16	30.2898	31.6875	27.7749	66.8629	33.8711	46.3514	1.64594	0.718915	0.00440379	0.050798
ITPKA	3.06302	2.535	0.740665	5.91053	7.64832	4.63514	2.8002	1.48553	0.00441991	0.050941
CPZ	4.42436	3.8025	2.222	0.738816	0.546309	1.65541	-3.76987	-1.91451	0.00443021	0.0510165
ASXL2	73.8527	62.7413	59.6235	128.739	83.5852	83.1014	1.51171	0.596178	0.00443402	0.0510174
SLC35F2	9.52938	10.14	6.29565	25.8586	15.0235	11.5878	2.03729	1.02665	0.00444248	0.0510717
FADS2	265.802	280.118	174.797	313.258	307.845	529.068	1.59429	0.672911	0.00444875	0.0511007
CD55	100.058	101.4	74.8072	220.167	116.91	106.939	1.60958	0.686686	0.00449158	0.051506
MT1G	2.04201	1.2675	9.99898	1.10822	0.819463	0.662162	-4.83407	-2.27324	0.0044895	0.051506
SPATA13	44.2436	39.2925	54.4389	21.7951	35.7832	27.4797	-1.63043	-0.705249	0.00454551	0.0520807
RAD9A	6.8067	9.50626	11.11	25.3045	12.5651	15.8919	1.9856	0.989577	0.00457179	0.0523378
PCDH9	123.542	103.935	87.7688	68.3405	76.4832	69.5271	-1.47417	-0.5599	0.00465332	0.0531819
TSPAN10	4.08402	3.16875	4.44399	1.29293	0.819463	0.993244	-3.51774	-1.81465	0.0046531	0.0531819
ANKHD1	96.3148	68.4451	79.2512	150.349	100.794	112.237	1.49399	0.579171	0.00467405	0.0533295
HECTD2	23.4831	18.6956	19.6276	9.60461	5.73624	16.5541	-1.96333	-0.9733	0.00467303	0.0533295
TCAF1	183.1	155.903	174.797	111.931	134.665	106.939	-1.45205	-0.538088	0.00468107	0.053365
DDX31	11.9117	7.92188	8.14732	20.1327	14.204	17.5473	1.87833	0.909453	0.0046976	0.053465
TACC2	17.6974	15.21	16.665	30.4762	31.4127	20.8581	1.69651	0.762568	0.00469768	0.053465
SNTA1	23.1428	26.6175	29.2563	14.961	19.9403	10.5946	-1.71626	-0.779269	0.00474106	0.0538717
gene:ENSG00000275993	5.7857	5.38688	2.96266	22.1645	6.00939	7.61487	2.54161	1.34574	0.00474131	0.0538717
PDGFRL	5.7857	8.23876	5.55499	2.40115	1.63893	3.97297	-2.55136	-1.35126	0.00475376	0.0539682
CCT4	179.357	183.471	164.798	285.368	227.264	251.291	1.45048	0.53653	0.00479018	0.0542913
PDCD1LG2	3.40335	2.85188	0.740665	4.6176	11.7456	4.63514	2.92584	1.54885	0.00478896	0.0542913
DENND1B	10.8907	10.4569	14.8133	5.17171	5.46309	7.94595	-1.99897	-0.99926	0.00480805	0.0544036
RAD23A	70.4493	79.2188	79.2512	127.076	116.364	90.3852	1.46686	0.552735	0.00480586	0.0544036
SCP2	50.7099	44.3626	53.6982	27.1515	34.6906	37.7433	-1.51789	-0.602065	0.00485421	0.054841
CNPY3	22.8024	21.5475	22.22	31.0303	37.4221	39.0676	1.58122	0.66104	0.00485877	0.054841
NOLC1	63.6426	66.5438	41.4772	105.651	78.3953	79.7906	1.53796	0.621018	0.00485831	0.054841
AMACR	17.6974	14.2594	9.62865	3.32467	7.92147	8.93919	-2.11981	-1.08393	0.00487006	0.0549231
NFAT5	100.399	83.972	92.9535	161.616	116.637	123.824	1.45651	0.542513	0.00487725	0.0549587
DST	831.098	707.583	641.416	987.059	1210.62	953.183	1.44509	0.531161	0.00488888	0.0549686
ACTC1	4.08402	3.8025	2.222	1.29293	0.819463	0	-4.00261	-2.00094	0.00489022	0.0549686
SPATA2	7.14704	7.60501	11.8506	17.5469	14.7503	15.8919	1.85397	0.890618	0.00488882	0.0549686
LMCD1	41.1805	42.4613	15.9243	22.9033	15.5698	15.8919	-1.82424	-0.867297	0.00491333	0.0550923
TMEM181	77.5964	85.2395	73.6962	113.224	93.1456	146.007	1.48455	0.57003	0.00490818	0.0550923
RIPK2	21.1008	22.1813	22.5903	38.9726	21.8523	54.2973	1.74159	0.800409	0.00491282	0.0550923
SOAT1	26.2058	36.4407	45.9212	53.7489	48.8946	73.169	1.61604	0.692461	0.00492357	0.0551618
SEMA3F	40.4999	41.5107	28.8859	108.606	68.2886	28.8041	1.85816	0.893872	0.00493416	0.055235
AASDH	18.7184	15.8438	18.1463	6.83405	12.0188	10.5946	-1.85216	-0.889212	0.00493834	0.0552366
PBXIP1	63.6426	67.1776	94.8051	42.6666	55.1772	49.3311	-1.53531	-0.61853	0.0049488	0.0553082
NSD3	103.462	95.3795	111.1	187.29	125.651	138.061	1.46082	0.546779	0.00495901	0.055377
TLNRD1	9.52938	17.1113	12.5913	20.3175	22.3987	25.8243	1.70795	0.772269	0.00497062	0.0554612
SQOR	16.6764	20.28	14.8133	30.2915	25.9497	29.1351	1.64645	0.719361	0.00501518	0.0559126
ZNF697	24.1638	30.1032	24.8123	39.342	35.5101	51.6487	1.58047	0.660352	0.0050456	0.05616
PCMTD2	36.0755	31.3707	44.8102	18.4704	24.0376	28.1419	-1.60913	-0.686277	0.00504267	0.05616
FZD4	11.5714	16.4775	12.221	5.91053	9.83355	3.97297	-2.03158	-1.02261	0.00507855	0.0564808
KLHL21	108.227	109.322	107.767	267.082	125.924	128.46	1.60564	0.683145	0.00509349	0.0564955
CAPN10	11.2311	14.8931	14.8133	24.0115	26.2228	17.8784	1.6875	0.754884	0.00509629	0.0564955
RAB30	13.2731	15.8438	12.221	6.09524	8.46778	8.27703	-1.87882	-0.909826	0.00509643	0.0564955
TMSB4X	779.708	791.872	629.936	457.143	637.542	375.115	-1.49768	-0.582731	0.00509169	0.0564955
ST6GALNAC3	3.40335	5.38688	5.18466	8.12698	7.37517	17.8784	2.33738	1.22489	0.00510765	0.0565436
XRRA1	15.9957	12.3581	8.14732	17.3622	18.8476	31.1216	1.81701	0.861566	0.00510906	0.0565436
GFRA1	62.2813	55.7701	36.2926	27.8903	39.8805	29.7973	-1.58801	-0.667222	0.00511423	0.0565549
MTDH	163.361	167.944	143.319	259.694	186.018	252.284	1.4705	0.556304	0.00512863	0.0566224
NEMP1	38.4579	30.42	38.8849	50.7936	57.6356	56.946	1.52612	0.609866	0.00512667	0.0566224
LGR4	15.9957	12.3581	3.70333	4.80231	4.91678	2.64865	-2.55672	-1.3543	0.00514898	0.0568012
TCIRG1	188.546	186.64	172.945	137.42	142.313	95.0203	-1.45731	-0.54331	0.00516291	0.0569088
TBCE_2	0	0.316875	0.740665	1.29293	1.63893	5.62838	7.33847	2.87548	0.00516723	0.0569104
SOD2	59.2183	54.8194	56.6609	95.1226	47.802	150.973	1.7194	0.781903	0.00519144	0.0570579
SEPTIN9	453.667	487.037	431.067	300.883	377.499	264.534	-1.4544	-0.540427	0.00519297	0.0570579
RAB5IF	49.3486	55.1363	49.6246	83.3015	72.9322	68.8649	1.47623	0.561922	0.00519316	0.0570579
SLC66A1	17.3571	22.4982	12.221	37.1255	29.2275	23.5068	1.72989	0.79068	0.0052025	0.0571145
ENPP1	16.3361	13.3088	16.665	3.13997	11.1993	8.27703	-2.08459	-1.05976	0.00521663	0.0572043
gene:ENSG00000275895	39.4789	36.7575	32.9596	69.0793	49.4409	49.6622	1.55247	0.634569	0.00521906	0.0572043
RNF170	22.8024	22.815	32.9596	13.8528	16.1161	17.2162	-1.6783	-0.746997	0.00522944	0.057272
RBM47	3.06302	1.90125	1.48133	0.184704	0.273154	0.662162	-6.00645	-2.58651	0.0052573	0.0575309
XPO5	38.4579	47.8482	35.1816	70.1876	54.3577	58.6014	1.51142	0.595909	0.00526263	0.0575432
ZNF362	37.4369	27.885	39.2553	17.7316	25.1302	22.8446	-1.60648	-0.683903	0.00529021	0.0577984
LARS1	111.97	123.581	112.581	151.827	161.707	192.027	1.44288	0.528953	0.00530958	0.0579636
GTF2IRD2B	39.8192	49.1157	47.7729	26.5974	25.1302	36.4189	-1.57405	-0.654482	0.00532439	0.0580789
RNF217	18.7184	13.9425	17.0353	26.4127	28.1349	27.8108	1.65391	0.72588	0.00535719	0.0583533
FAM13C	3.06302	4.11938	7.40665	0.554112	0.819463	2.97973	-3.56556	-1.83413	0.00536008	0.0583533
SIRPA	133.752	128.018	82.9545	86.6262	82.2194	56.946	-1.52295	-0.606873	0.00536238	0.0583533
SYTL3	4.76469	3.48563	3.33299	12.1905	7.92147	6.29054	2.33941	1.22615	0.00537951	0.0583642
PTCD1	6.8067	10.4569	10.7396	19.2092	17.2087	13.9054	1.84603	0.884423	0.00538424	0.0583642
VAMP1	22.8024	22.4982	26.2936	11.0822	19.6671	11.5878	-1.69969	-0.765274	0.00536991	0.0583642
APOLD1	22.4621	14.5763	14.8133	4.6176	12.0188	9.93244	-1.98741	-0.990886	0.00537319	0.0583642
DDX55	11.5714	12.675	15.9243	26.0433	18.8476	21.1892	1.68114	0.749442	0.00538477	0.0583642
IPO7	182.42	176.5	171.464	302.361	190.662	291.02	1.47871	0.564338	0.00539628	0.0584425
MYBL1	13.6134	14.2594	13.7023	19.0245	28.6812	22.8446	1.6723	0.741836	0.00544187	0.058691
PTGDR2	2.38235	1.58438	2.96266	0	0.273154	0.993244	-6.31684	-2.6592	0.00544264	0.058691
NEDD8-MDP1	0.68067	0	0	2.21645	0.546309	4.96622	9.72634	3.2819	0.00543915	0.058691
UBE2S	76.5754	70.3463	77.7698	93.0909	124.012	110.25	1.4509	0.53695	0.00544503	0.058691
PABPC1L	18.7184	8.87251	15.1836	23.4574	37.6953	17.8784	1.85214	0.889197	0.00543965	0.058691
CFAP298	13.2731	16.4775	17.776	27.1515	27.3154	22.5135	1.64378	0.717017	0.00543336	0.058691
CYP51A1	42.8822	63.6919	25.5529	71.8499	48.6215	118.527	1.80358	0.850866	0.0054738	0.0588708
SHMT2	203.18	196.78	165.539	297.558	223.987	308.899	1.4676	0.553462	0.00547896	0.0588708
SIPA1L1	75.8947	85.2395	106.285	183.411	97.2429	126.473	1.52601	0.609761	0.00547778	0.0588708
SEZ6L2	15.3151	17.1113	13.7023	9.97402	7.92147	6.95271	-1.79741	-0.845919	0.00547075	0.0588708
TVP23B	31.6512	33.9057	34.8113	57.6277	36.0564	68.8649	1.61659	0.69295	0.00548424	0.0588811
CDK13	85.7644	86.8238	87.7688	167.342	96.4235	119.52	1.47641	0.562092	0.00549735	0.0589756
EPB41L3	93.5921	82.7045	77.0292	181.379	127.017	82.1081	1.54509	0.627693	0.00551139	0.0590797
ATF4	376.07	387.539	362.556	884.548	361.383	557.21	1.60165	0.679559	0.0055194	0.0591191
AFAP1	123.201	123.581	86.6578	195.048	145.045	150.311	1.47188	0.557661	0.00552462	0.0591286
SCHIP1	4.08402	3.8025	8.51765	0	2.73154	1.65541	-3.81433	-1.93143	0.00553813	0.0591686
ITPR3	97.3358	115.343	74.0665	236.052	166.351	83.1014	1.69456	0.760913	0.00554137	0.0591686
PNPLA8	49.0082	49.4326	41.1069	87.5497	46.4362	90.7163	1.60907	0.686224	0.00553439	0.0591686
RASA3	44.9242	48.1651	71.1039	94.5685	94.2382	62.9054	1.53976	0.622708	0.00554872	0.0592008
gene:ENSG00000275740	13.9537	16.7944	10.7396	33.6161	21.0329	17.8784	1.76103	0.816421	0.00556145	0.0592902
RECK	38.1175	38.025	35.9223	18.2857	31.6859	19.5338	-1.62118	-0.697047	0.00558786	0.0594941
RND2	2.04201	1.2675	1.48133	0.184704	0	0	-13.8347	-3.79022	0.00558929	0.0594941
FAM177A1	28.5881	32.3213	31.4783	46.7301	40.7	55.2906	1.53146	0.614907	0.00561685	0.0597408
IVNS1ABP	25.5251	34.2225	46.6619	69.0793	45.0705	56.6149	1.61196	0.688813	0.00562483	0.0597791
MAP3K20	104.483	85.2395	89.2501	149.241	119.642	129.784	1.43512	0.521173	0.00563025	0.0597902
UACA	269.205	290.892	249.234	106.205	249.936	153.291	-1.59008	-0.669101	0.00565339	0.0599893
LONP1	102.781	115.343	88.5095	165.31	133.299	142.034	1.43855	0.524612	0.00566878	0.0601058
RAPGEF6	18.0378	15.21	10.3693	33.4314	27.0423	16.8851	1.78422	0.835292	0.00572766	0.0606477
CCN4	2.72268	1.2675	1.48133	0	0	0.662162	-9.26004	-3.21102	0.00573156	0.0606477
CDH11	53.4326	56.4038	31.8486	32.6926	28.9544	25.8243	-1.61491	-0.691453	0.00573323	0.0606477
CTH	9.86972	7.92188	8.88798	23.4574	10.1067	18.5405	1.96681	0.975854	0.00574429	0.0607177
KPNA4	83.0417	82.3876	69.9929	126.338	95.0577	119.851	1.45017	0.53622	0.00577097	0.0609526
AP2M1	649.7	681.916	658.451	478.384	503.697	398.622	-1.43909	-0.525161	0.00578209	0.0610227
ZC4H2	13.2731	13.3088	10.3693	6.27994	6.82886	6.62162	-1.89236	-0.920185	0.00581307	0.0613023
CCDC93	55.4746	52.2844	67.4005	128.554	66.6496	78.4663	1.56861	0.649487	0.00582196	0.0613486
HSP90AB1	836.543	936.367	916.203	1927.02	1025.97	1085.28	1.5021	0.586984	0.00585209	0.0614795
SEC63	122.861	141.96	124.061	217.766	132.48	234.406	1.50276	0.587615	0.00585497	0.0614795
ESRRA	21.4411	19.6463	17.776	39.7114	29.5007	25.1622	1.62497	0.700414	0.00584232	0.0614795
CHST14	39.4789	39.9263	40.7366	19.7633	33.8711	21.1892	-1.61338	-0.690087	0.00584686	0.0614795
PATZ1	32.6722	30.42	38.1443	16.0693	27.5886	19.2027	-1.62122	-0.697078	0.00585691	0.0614795
IFITM1	6.12603	7.92188	8.14732	2.58586	4.37047	3.31081	-2.22137	-1.15145	0.00587998	0.0616743
ATP7A	63.983	54.1857	82.5842	30.2915	48.8946	50.6554	-1.55423	-0.636202	0.00588944	0.0617261
GNB4	127.626	128.335	137.023	63.5382	84.6778	118.196	-1.48235	-0.567882	0.00590249	0.061768
PLCE1	18.7184	13.3088	6.29565	3.69408	7.64832	6.29054	-2.20674	-1.14192	0.0059011	0.061768
AARS1	205.222	192.026	141.837	269.668	318.498	210.237	1.48106	0.566626	0.00591023	0.0618016
SLC25A38	31.6512	28.5188	31.1079	62.43	36.0564	45.027	1.584	0.663573	0.00593459	0.0619613
BCL2L2	38.4579	40.8769	52.2169	67.0476	54.6309	76.1487	1.50428	0.589078	0.00593231	0.0619613
CHMP1B	60.5796	68.762	68.5115	119.873	77.5758	91.0473	1.46451	0.550417	0.00594376	0.0620096
CNNM4	11.9117	15.5269	14.8133	33.062	19.1208	19.8649	1.72627	0.787657	0.00597096	0.0622094
TGIF2	13.9537	17.1113	23.331	9.0505	10.3799	10.5946	-1.82048	-0.864319	0.00597203	0.0622094
GIGYF2	88.4871	78.5851	96.2865	148.317	121.007	105.284	1.43135	0.517373	0.00600966	0.0624109
THAP4	43.9032	42.4613	42.5882	66.6782	59.0013	60.9189	1.45961	0.545585	0.0060016	0.0624109
FERMT3	0.68067	0.316875	0	3.69408	1.91208	1.32432	6.60503	2.72356	0.00599806	0.0624109
JOSD1	83.7224	96.9639	74.8072	139.636	104.891	121.838	1.43529	0.52134	0.00600733	0.0624109
TCEAL1	15.3151	17.745	13.7023	7.38816	11.1993	7.61487	-1.81996	-0.863904	0.00602088	0.0624798
gene:ENSG00000249319	3.40335	2.535	2.222	0	0	0	-78.844	-6.30093	0.00609798	0.0632318
TNC	155.533	180.302	129.616	72.9581	144.499	87.0744	-1.53045	-0.613953	0.00613229	0.0635393
CEBPZ	43.5629	44.6794	39.9959	62.7994	60.3671	64.2298	1.45614	0.542152	0.00615399	0.0637066
EIF5	219.516	212.623	224.792	352.415	248.57	356.906	1.45855	0.544539	0.00615778	0.0637066
KDELR3	182.76	184.105	168.131	115.994	94.5114	155.277	-1.4666	-0.552474	0.00616931	0.0637776
SLC35G2	7.82771	13.3088	7.77698	15.6998	19.394	19.8649	1.84271	0.88183	0.00618196	0.0638599
LIMS4	2.04201	3.8025	2.222	14.961	5.46309	2.97973	2.91333	1.54267	0.00619599	0.0639565
HLTF	80.3191	68.1282	77.0292	37.6796	55.1772	57.2771	-1.5161	-0.600366	0.00621372	0.064091
SPCS2	50.0292	56.0869	40.7366	75.9134	60.6403	87.7365	1.5198	0.603882	0.00622182	0.0641261
ESD	107.546	102.984	103.323	58.7359	79.4879	80.4527	-1.44954	-0.535596	0.00623369	0.0641516
NOP10	37.0965	47.2144	44.4399	67.6017	63.3718	56.2838	1.47031	0.55612	0.00623366	0.0641516
MIPEP	35.7352	33.5888	39.2553	13.4834	21.0329	30.7906	-1.6871	-0.754541	0.00624192	0.0641878
DCP1A	26.8865	27.2513	36.2926	65.7547	29.7738	53.3041	1.65164	0.7239	0.00624895	0.0642117
AMY2B	6.8067	7.28813	6.29565	0.738816	4.64362	2.31757	-2.74052	-1.45445	0.00626242	0.0642534
YWHAG	191.949	198.047	178.871	295.896	250.756	269.169	1.437	0.52306	0.00626142	0.0642534
GALNT15	11.2311	13.3088	18.1463	6.09524	4.37047	11.2568	-2.00052	-1.00038	0.00628233	0.0644092
BCL7B	30.9705	28.2019	29.6266	65.57	38.7879	36.75	1.60217	0.680031	0.00637223	0.0652029
NCR3LG1	15.3151	16.7944	11.4803	36.7561	13.6577	29.7973	1.84069	0.880246	0.00637295	0.0652029
RCOR2	5.7857	7.92188	4.81432	2.58586	3.27785	0.993244	-2.5864	-1.37095	0.00637408	0.0652029
C1S	66.7057	69.3957	53.6982	30.8456	42.6121	52.6419	-1.52225	-0.60621	0.00639262	0.0653436
LARP1	319.575	317.509	260.714	522.528	428.852	353.926	1.45523	0.541246	0.00640484	0.0654195
PTPN13	163.701	145.129	214.793	100.294	128.656	129.784	-1.46185	-0.547799	0.00642898	0.065617
SOX11	20.7604	17.4281	17.4056	26.4127	46.7094	21.8514	1.70726	0.771679	0.00645636	0.0658013
SSR3	227.003	232.27	158.873	302.361	256.219	356.243	1.4781	0.563741	0.00645668	0.0658013
CCNL1	39.4789	44.9963	56.2905	128.185	59.8208	51.3176	1.7059	0.770534	0.00647008	0.0658886
INO80D	18.0378	16.7944	19.6276	32.5079	25.4033	28.473	1.61792	0.694144	0.00647538	0.0658934
PLAGL2	24.8445	27.5682	28.8859	46.176	37.4221	38.7365	1.53152	0.614966	0.00648196	0.0659112
SLC25A20	10.8907	11.7244	8.51765	19.3939	18.3013	18.2095	1.79047	0.840338	0.00648748	0.0659182
ETNK2	10.2101	10.7738	17.0353	6.27994	7.10201	5.95946	-1.93879	-0.955158	0.00650111	0.0660076
TSPYL4	32.3318	33.9057	54.4389	26.228	27.5886	20.527	-1.60893	-0.686103	0.00650923	0.0660372
USP10	73.8527	65.5932	56.6609	103.804	96.1503	82.1081	1.44496	0.531026	0.00651371	0.0660372
RERG	7.14704	3.16875	12.9616	3.13997	0.819463	4.30406	-2.79713	-1.48395	0.0065819	0.066679
NDOR1	38.1175	22.1813	29.2563	47.0995	51.6262	40.723	1.56387	0.645123	0.00661876	0.0668538
INF2	129.327	150.516	108.507	251.382	191.754	139.385	1.50189	0.586783	0.00661605	0.0668538
PER1	86.7854	86.8238	61.8455	44.6984	8.19463	59.9257	-2.08748	-1.06176	0.00661737	0.0668538
MT-ATP6	2485.81	2510.6	2661.21	1448.63	1892.69	2036.15	-1.42459	-0.510548	0.00660617	0.0668538
RBM15	11.2311	8.55563	9.99898	21.4257	15.5698	15.5608	1.81133	0.857046	0.00664694	0.0669902
CACYBP	49.3486	57.0376	49.2542	83.8557	72.9322	69.196	1.46443	0.550336	0.00664817	0.0669902
MESD	42.5419	43.095	40.3662	62.2453	56.2698	65.5541	1.45595	0.541961	0.0066483	0.0669902
DOT1L	63.6426	70.6632	61.1049	123.198	82.2194	80.4527	1.46924	0.555075	0.0066519	0.0669902
IKBKB	33.3528	33.5888	33.7003	56.3347	46.4362	44.696	1.48966	0.574985	0.00667098	0.067087
FBXO3	30.9705	28.8357	38.8849	16.4387	22.1255	24.5	-1.59023	-0.669236	0.00667133	0.067087
NBPF14	59.2183	60.8401	45.5509	93.8297	98.3355	58.6014	1.51704	0.601259	0.00668277	0.0671524
AACS	30.2898	26.6175	25.5529	45.4372	37.4221	43.0406	1.53771	0.620785	0.00670519	0.0672825
LIF	9.86972	6.02063	5.92532	9.2352	18.3013	16.223	1.97213	0.979751	0.00670557	0.0672825
ABHD11	3.40335	6.65438	2.59233	10.3434	12.0188	6.95271	2.2926	1.19698	0.00672634	0.0674413
ARHGEF17	135.113	131.503	138.875	91.4285	105.711	89.0609	-1.41708	-0.502919	0.00673519	0.0674805
MIS12	24.5041	25.35	24.0716	38.4185	26.7691	56.2838	1.6339	0.70832	0.00675255	0.0676048
MYO10	119.458	109.322	108.507	209.454	141.494	138.723	1.45644	0.542448	0.00677182	0.0676986
FNIP1	34.0335	44.3626	48.5136	89.7662	54.0846	51.9798	1.55147	0.633632	0.00677233	0.0676986
SYT1	13.6134	12.3581	14.0726	20.6869	25.1302	19.5338	1.63295	0.70748	0.00677681	0.0676986
XBP1	123.882	134.038	109.618	281.489	102.16	221.493	1.64691	0.71976	0.00681169	0.0679973
SLC19A1	16.3361	25.6669	12.5913	32.6926	33.8711	24.8311	1.66888	0.738877	0.00681732	0.0680038
ID2	45.9452	36.7575	49.2542	42.4819	15.5698	11.9189	-1.86734	-0.900982	0.0068459	0.0682332
TWNK	8.16804	6.97126	6.66599	15.1457	11.7456	12.9122	1.8562	0.892349	0.00685033	0.0682332
EFR3A	62.6216	70.3463	60.3642	89.5815	83.5852	105.946	1.43151	0.517535	0.00687803	0.0684592
PARN	46.9662	48.7988	51.8466	32.3232	36.6027	31.7838	-1.46613	-0.55201	0.00688364	0.0684651
GNG2	24.1638	34.2225	40.3662	6.46464	21.0329	24.5	-1.91478	-0.93718	0.00690649	0.0686424
FAM229B	7.82771	7.28813	12.9616	2.58586	3.82416	6.29054	-2.2918	-1.19648	0.00692761	0.0688022
MTOR	94.2728	97.2807	95.1755	140.929	138.216	126.142	1.42172	0.507635	0.00695532	0.0689276
SLC5A6	24.1638	32.955	20.3683	43.2208	38.7879	38.4054	1.54991	0.632184	0.00695243	0.0689276
SNX30	71.13	65.9101	70.3632	58.5512	40.7	36.4189	-1.50907	-0.593661	0.00695539	0.0689276
PPT2	15.9957	24.7163	22.5903	10.5281	15.2966	10.5946	-1.74829	-0.805947	0.00698459	0.0691667
NDN	0.340335	0.633751	0.370333	3.13997	3.27785	0.993244	5.42656	2.44004	0.00699966	0.0692155
TRPM7	63.983	51.9676	57.0312	80.1616	76.4832	96.6757	1.45652	0.542528	0.00699937	0.0692155
NANS	63.6426	77.3176	56.6609	112.115	78.1221	96.6757	1.45279	0.538821	0.00701096	0.069277
HIVEP2	33.0125	32.3213	22.9606	86.9956	34.1443	34.1014	1.76345	0.818398	0.00704118	0.0695253
FHOD1	98.3568	83.6551	76.6588	40.0808	80.3074	45.6892	-1.5602	-0.641732	0.00705574	0.0696186
PIAS3	122.18	110.273	135.171	72.5887	90.9604	96.3446	-1.42299	-0.50893	0.0070705	0.0697139
ADIPOR2	73.5124	73.832	79.2512	129.662	95.3308	98.9933	1.43928	0.525343	0.00707833	0.0697407
KIAA0895L	30.9705	25.6669	36.2926	11.4517	25.9497	17.2162	-1.71258	-0.776169	0.00711333	0.0700349
IGFBP4	1487.94	1631.91	1637.98	1050.23	1215.26	1127.33	-1.40321	-0.488731	0.00713447	0.0701924
ALDH6A1	28.9285	25.6669	49.6246	10.1587	17.755	29.4662	-1.82994	-0.871795	0.00715411	0.070335
BNC1	4.42436	4.43626	2.222	12.9293	4.64362	9.27027	2.4177	1.27364	0.0072167	0.0708993
ABAT	7.48737	7.28813	6.66599	4.06349	2.73154	2.31757	-2.21083	-1.14459	0.0072257	0.0709366
gene:ENSG00000285816	7.82771	14.8931	19.2573	18.101	33.598	24.5	1.81019	0.856141	0.00725091	0.0710818
SRP68	104.823	97.2807	104.063	187.29	114.178	141.372	1.45046	0.536513	0.00724684	0.0710818
CLIP1	133.071	129.919	104.804	252.121	166.624	132.101	1.50018	0.585133	0.00725942	0.0711142
MKS1	17.6974	12.0413	21.4793	5.91053	12.0188	9.60136	-1.88332	-0.913276	0.00727627	0.0711771
DERL3	0.340335	0.316875	0	2.58586	2.45839	0.993244	8.25701	3.04562	0.00727275	0.0711771
FAM214A	38.1175	31.3707	60.3642	31.3997	15.2966	29.1351	-1.70503	-0.769801	0.00729862	0.0713445
RAB3IL1	4.42436	1.90125	2.59233	12.1905	6.82886	3.64189	2.58321	1.36916	0.00730884	0.0713933
IDH1	83.3821	88.4082	94.4348	96.7849	117.456	183.419	1.48926	0.5746	0.00732134	0.0714131
IL17RC	51.0503	46.5807	40.3662	29.9221	34.9637	24.5	-1.53534	-0.618563	0.00731969	0.0714131
HSF1	65.004	62.7413	63.6972	106.39	83.3121	82.4392	1.434	0.520046	0.00734564	0.071599
FAM193B	40.4999	33.9057	40.3662	58.1818	59.8208	50.9865	1.48962	0.574942	0.00735645	0.0716532
CTDSP1	85.4241	92.5276	79.6215	49.8701	67.7423	61.25	-1.45519	-0.54121	0.00740832	0.0720042
DNAJC2	31.6512	37.7082	22.22	70.3723	36.0564	42.7095	1.63192	0.706568	0.00740081	0.0720042
GNB1L	3.06302	4.43626	3.70333	11.4517	9.01409	4.96622	2.31955	1.21384	0.00740715	0.0720042
HADHA	185.823	179.351	231.828	279.088	302.109	275.46	1.43724	0.523299	0.00741655	0.0720329
AMDHD2	17.6974	17.745	12.221	32.1385	41.2463	13.9054	1.83388	0.874896	0.00745209	0.0723266
PEX6	17.0168	14.5763	15.554	23.8268	23.4913	30.1284	1.61338	0.690085	0.00746734	0.0724231
FAM126A	82.7014	93.7951	78.1402	93.4603	138.489	135.743	1.43686	0.522915	0.00748106	0.0725046
CPED1	6.46637	7.28813	4.44399	13.4834	8.19463	15.2297	2.00151	1.00109	0.00749276	0.0725665
PLEKHF1	9.52938	6.97126	9.99898	26.9668	8.19463	18.8716	2.05162	1.03676	0.00750581	0.0726413
HSPA12A	20.0798	16.1606	17.0353	24.9351	28.408	34.7635	1.62063	0.696551	0.0075131	0.0726603
NT5E	268.865	288.04	347.742	358.511	703.919	348.629	1.55976	0.641324	0.00755324	0.0729968
CENPP	17.6974	12.9919	15.1836	7.57287	11.4725	6.29054	-1.80253	-0.850024	0.00756411	0.0730501
DNAJA3	42.5419	42.1444	33.3299	66.1241	57.3624	50.9865	1.4889	0.574243	0.00757924	0.0730928
GGT5	11.9117	11.0906	14.8133	6.46464	4.91678	8.60811	-1.91026	-0.933767	0.00757646	0.0730928
CSTB	69.088	77.3176	54.4389	105.651	130.021	68.5338	1.51535	0.599653	0.00762924	0.0735231
gene:ENSG00000285043	7.14704	5.38688	14.0726	2.95527	5.46309	2.64865	-2.38015	-1.25105	0.00764469	0.0736199
RIPOR2	1.36134	0.950626	2.222	0.184704	0	0	-12.8699	-3.68593	0.00767075	0.0738188
MRPS2	28.5881	31.0538	37.7739	56.7042	42.3389	45.3581	1.5005	0.585444	0.00768415	0.0738957
SPDL1	34.3738	28.8357	35.9223	38.049	63.9181	53.3041	1.55902	0.640636	0.00769746	0.0739715
PDE12	19.0588	19.9631	17.776	27.1515	30.047	33.7703	1.56573	0.646835	0.00770642	0.0740055
FNBP1L	25.5251	32.3213	35.5519	14.5916	22.1255	22.8446	-1.5948	-0.673377	0.00775496	0.0744193
USP31	14.6344	23.7657	9.99898	39.1573	22.1255	24.8311	1.77868	0.83081	0.00778716	0.0746758
PITPNC1	10.8907	12.0413	11.8506	28.075	18.0282	14.8987	1.7832	0.834471	0.00782616	0.074997
GNA13	65.004	62.4244	66.6599	90.3203	75.3906	116.21	1.44771	0.533769	0.00784326	0.0750555
IL1RAPL2	0.68067	3.48563	2.222	0.369408	0.273154	0.331081	-5.99021	-2.58261	0.0078423	0.0750555
UCHL1	334.549	331.452	319.227	426.482	418.472	560.852	1.42462	0.510573	0.00790264	0.0755707
NPIPB12	6.8067	5.70376	8.88798	12.9293	18.5745	9.60136	1.93954	0.955714	0.00790837	0.0755726
PLEKHB2	82.0207	95.0626	95.5458	163.648	119.642	106.939	1.43744	0.5235	0.00791952	0.0756261
ALDOC	22.4621	22.4982	15.9243	12.1905	12.5651	10.2635	-1.72931	-0.790198	0.00793131	0.0756858
LAMC1	1042.11	1012.1	947.681	676.202	817.824	644.284	-1.40389	-0.489433	0.00794518	0.0757651
FNDC5	3.74369	0.316875	1.111	0	0.273154	0	-14.6444	-3.87228	0.00799666	0.0761683
C1orf21	24.8445	23.1319	11.8506	10.1587	13.3846	8.27703	-1.87914	-0.910073	0.00799862	0.0761683
MTF1	26.2058	25.6669	24.0716	45.0678	33.598	36.75	1.53927	0.622245	0.00807488	0.0768409
TPM4	2149.56	2208.94	1908.32	1632.05	1428.87	1412.72	-1.40018	-0.485612	0.00809536	0.0769821
BDH2	32.3318	23.7657	26.6639	13.114	21.306	16.5541	-1.64343	-0.716711	0.00810182	0.0769899
REPS1	38.7982	46.2638	45.1806	71.8499	48.0752	72.8379	1.48076	0.566341	0.00814675	0.0773629
MBD1	79.2981	77.0007	77.3995	136.681	90.6872	106.939	1.4365	0.522561	0.00816402	0.077473
RPE	14.6344	15.5269	18.887	23.8268	21.306	38.7365	1.69483	0.761139	0.00818781	0.0776448
CAPN15	57.1763	60.8401	70.3632	105.466	88.7751	75.8176	1.44559	0.531661	0.00821538	0.0778521
CLUH	66.7057	66.8607	51.1059	136.496	83.8584	64.5608	1.54689	0.629369	0.00822435	0.077883
ABHD5	34.7142	37.0744	25.9233	54.4877	37.149	60.9189	1.55506	0.636967	0.00828201	0.0783747
TPRA1	42.8822	35.8069	35.1816	77.7604	42.0658	56.2838	1.55321	0.635252	0.00829405	0.0784343
FAM219A	39.1385	42.1444	32.9596	60.2135	61.7329	47.6757	1.49156	0.576823	0.00830125	0.078448
NAA80	13.9537	10.4569	11.4803	5.17171	7.64832	6.62162	-1.89392	-0.921376	0.00831432	0.0785171
MTFR1	24.5041	20.28	19.998	30.6609	29.2275	43.0406	1.56822	0.649127	0.00832234	0.0785384
HSPB11	24.1638	24.3994	25.9233	11.4517	18.0282	17.5473	-1.63275	-0.707304	0.00835419	0.0785623
FBXO4	13.2731	10.4569	10.7396	2.95527	6.28255	8.27703	-2.05915	-1.04205	0.00833873	0.0785623
APBB1	86.7854	85.5563	72.2149	55.5959	65.8302	47.3446	-1.44603	-0.532097	0.0083481	0.0785623
LAYN	60.92	61.1569	52.5872	39.8961	42.6121	36.4189	-1.46628	-0.552161	0.00834098	0.0785623
TAX1BP3	166.083	168.578	134.801	99.1861	134.392	93.3649	-1.43689	-0.522946	0.00834405	0.0785623
NEDD4L	6.12603	8.23876	4.07366	30.1068	13.1114	3.31081	2.52696	1.3374	0.0083594	0.0785623
CLEC11A	47.9872	38.9757	38.8849	27.5209	33.8711	18.2095	-1.56827	-0.649176	0.00839099	0.0788049
PILRB	28.9285	20.9138	19.998	35.8326	32.5054	40.3919	1.54479	0.627412	0.00842735	0.0790919
SEMA3C	119.458	124.849	216.645	109.16	89.8678	110.581	-1.48729	-0.572685	0.00843966	0.0791022
CAV1	498.25	574.495	550.685	226.632	490.858	359.554	-1.50819	-0.592821	0.00844004	0.0791022
MRE11	62.2813	52.9182	51.8466	26.228	48.6215	33.1081	-1.55515	-0.637051	0.008464	0.0792723
DCLRE1A	16.3361	12.3581	16.2946	5.91053	10.9262	8.60811	-1.81045	-0.856346	0.0084881	0.0794435
LRRC8B	7.14704	4.43626	6.66599	2.21645	1.91208	3.64189	-2.4101	-1.26909	0.00850849	0.0795646
LIPG	0.68067	0.316875	0.370333	1.84704	1.36577	4.96622	5.39394	2.43134	0.00853603	0.0795646
TICAM1	12.2521	11.4075	9.99898	23.4574	21.0329	13.9054	1.76564	0.820194	0.00852062	0.0795646
DUS3L	12.5924	15.5269	9.99898	26.9668	19.1208	17.5473	1.68507	0.752811	0.00852867	0.0795646
CD37	1.70168	1.58438	1.85166	0.369408	0.273154	0	-6.15641	-2.62209	0.00852139	0.0795646
COL6A2	3069.82	2981.8	2407.16	2172.12	2115.58	1708.38	-1.41046	-0.496169	0.00853048	0.0795646
PPFIA4	12.9327	8.23876	11.8506	6.09524	4.09731	5.95946	-1.99584	-0.996994	0.00856248	0.0797567
CRKL	62.962	74.7826	66.2895	115.994	89.8678	83.7636	1.42727	0.51326	0.00857067	0.0797786
NIPAL2	20.7604	23.7657	31.1079	9.0505	10.1067	23.5068	-1.79651	-0.845195	0.00858251	0.0798343
DMXL2	82.0207	77.3176	64.4379	41.189	55.9966	55.6216	-1.48059	-0.566171	0.00861228	0.0800566
NRP2	246.403	235.755	197.017	118.026	156.244	193.351	-1.45723	-0.543232	0.00867053	0.0805432
ME1	82.3611	80.8032	97.7678	121.166	97.5161	153.953	1.42629	0.512263	0.00869204	0.0806881
CCT5	168.806	175.866	147.392	236.421	238.191	220.169	1.41183	0.497571	0.0087646	0.0813064
DOCK11	55.1343	49.7494	54.4389	33.062	39.0611	36.0879	-1.48442	-0.569901	0.0087721	0.0813207
ALG12	23.8235	29.1525	24.0716	40.2655	35.2369	41.0541	1.5075	0.592159	0.00890146	0.0824639
TBRG1	36.7562	42.7782	44.0696	61.8759	55.1772	61.25	1.44797	0.53403	0.00891143	0.0825002
JAK2	42.2015	35.8069	39.6256	22.3492	26.2228	31.1216	-1.51264	-0.597068	0.00891753	0.0825008
TMOD2	51.3906	44.0457	35.5519	13.114	29.5007	35.4257	-1.69372	-0.7602	0.00897713	0.0829959
SSBP2	33.6932	31.0538	52.5872	23.4574	19.9403	30.1284	-1.59833	-0.676569	0.00902067	0.083226
PTAR1	61.6006	53.2351	64.0675	77.0216	77.0295	108.595	1.46157	0.547514	0.00901389	0.083226
PITPNM1	44.2436	38.3419	37.4036	66.4935	45.0705	67.2095	1.49063	0.575922	0.00902641	0.083226
FBXL8	12.2521	9.82314	9.25831	4.98701	6.28255	4.96622	-1.94036	-0.956325	0.0090242	0.083226
ATF7-NPFF	0.68067	0	0	4.6176	2.45839	0	9.199	3.20148	0.00905474	0.0834307
SESTD1	46.6259	44.0457	47.0322	31.3997	32.7785	26.8176	-1.49539	-0.580517	0.00906342	0.0834476
SCAF1	96.6551	114.709	91.1018	157.368	149.689	119.189	1.41232	0.498068	0.00906879	0.0834476
METRN	32.6722	39.9263	36.2926	26.7821	24.3107	17.8784	-1.54155	-0.62438	0.00909151	0.0835733
C1QL1	4.08402	8.23876	0.740665	1.10822	1.36577	0.993244	-3.71758	-1.89436	0.0090947	0.0835733
ZNF43	11.2311	8.23876	9.99898	3.32467	5.73624	5.95946	-2.06523	-1.0463	0.00914569	0.0839339
MAGED4	120.479	61.7907	78.8808	111.746	109.535	181.101	1.53885	0.621853	0.00914625	0.0839339
SYNPO	16.3361	15.5269	6.66599	5.91053	6.5557	7.28379	-1.97768	-0.983806	0.00916775	0.0840182
NT5C2	63.3023	51.6507	44.8102	86.2568	56.8161	96.3446	1.49637	0.581469	0.00916488	0.0840182
SEC62	94.6131	103.935	101.101	172.144	104.345	153.622	1.4371	0.523162	0.00917982	0.0840724
AGAP4	10.5504	6.02063	7.03632	14.0375	14.4772	13.9054	1.79781	0.846239	0.00924985	0.0846569
DDR2	234.15	218.327	275.157	324.156	284.354	447.291	1.45012	0.536168	0.00931884	0.0852274
MDP1	5.44536	4.75313	6.29565	1.29293	3.82416	0	-3.13034	-1.64632	0.00932467	0.0852274
CLCN3	84.7434	79.8526	76.6588	97.1544	107.623	142.365	1.43049	0.516511	0.00934279	0.0853358
KCNG1	65.3443	56.7207	22.22	136.681	67.196	56.6149	1.80618	0.852943	0.00935332	0.0853749
ZNF827	53.0923	45.9469	44.4399	22.7186	44.251	23.8378	-1.58353	-0.663146	0.00936992	0.0854121
EAPP	28.5881	30.42	39.2553	17.7316	24.3107	22.1824	-1.54594	-0.628488	0.00936609	0.0854121
ZBTB43	18.0378	23.4488	22.5903	47.6537	22.6718	34.1014	1.6383	0.7122	0.00938418	0.085485
PROCA1	4.42436	2.85188	4.44399	1.10822	1.63893	0.993244	-3.06093	-1.61397	0.0094174	0.0857304
RHBDF2	3.06302	7.60501	4.07366	18.101	6.28255	8.93919	2.26519	1.17963	0.00943504	0.0858337
ESF1	15.9957	11.7244	14.443	26.228	24.857	16.5541	1.63548	0.709715	0.00946993	0.0860937
CSMD2	2.04201	3.48563	1.85166	0.554112	0.273154	0.993244	-4.13497	-2.04788	0.00951969	0.0864885
EDNRA	14.9747	12.9919	14.0726	25.4892	15.0235	30.1284	1.67582	0.744869	0.009532	0.0865427
F8	4.76469	4.75313	3.33299	1.47763	1.91208	0.993244	-2.86088	-1.51646	0.00954156	0.0865719
H6PD	108.907	130.553	124.061	61.1371	106.257	84.4257	-1.44862	-0.534683	0.00955492	0.0865779
EIF3A	398.192	380.25	374.777	755.07	426.394	497.615	1.45698	0.542985	0.0095503	0.0865779
MARCKSL1	64.3233	77.0007	84.0655	43.2208	63.9181	44.3649	-1.48952	-0.574846	0.00956213	0.0865858
RABL2B	12.9327	14.8931	13.7023	19.2092	26.2228	22.5135	1.60269	0.680492	0.00958447	0.0867305
CCSER2	49.6889	52.9182	38.5146	80.7157	49.7141	87.0744	1.53836	0.621392	0.00961634	0.0869613
MED12L	2.72268	0.633751	1.111	0	0.273154	0	-12.8369	-3.68223	0.00968985	0.0875466
PSAT1	165.743	173.965	142.208	205.76	222.074	258.574	1.41801	0.503863	0.0096939	0.0875466
EIF1B	27.9075	33.9057	22.5903	45.4372	37.149	48.0068	1.53608	0.619253	0.00970763	0.0876126
BTN2A1	46.6259	44.9963	47.4026	78.4992	64.1913	57.6081	1.45827	0.544259	0.00972965	0.0877533
PI4K2A	49.0082	59.2557	47.0322	99.5555	63.0986	66.8784	1.48372	0.569218	0.00976039	0.0879724
CNKSR3	22.1218	17.4281	18.1463	9.60461	12.2919	12.25	-1.73033	-0.791049	0.00977289	0.088027
ZNF692	17.0168	13.9425	12.221	23.088	27.0423	19.2027	1.61212	0.688961	0.00980135	0.0882251
NOP16	9.52938	9.82314	3.70333	17.3622	15.0235	11.2568	1.89009	0.918455	0.00981432	0.0882836
GOLGA3	235.512	228.15	227.755	425.189	254.033	316.514	1.44179	0.527865	0.00982404	0.0883128
PRRX2	24.8445	19.0125	17.0353	15.3304	11.1993	3.64189	-1.97915	-0.984879	0.00984054	0.0884029
EFL1	32.6722	28.8357	32.2189	55.9653	47.2557	36.4189	1.5095	0.594074	0.00991943	0.089053
gene:ENSG00000284820	6.46637	0	2.222	12.7446	11.4725	2.97973	3.12058	1.64181	0.0099301	0.0890901
PMP22	17.6974	26.9344	6.29565	6.46464	11.7456	5.95946	-2.11092	-1.07787	0.0099554	0.0892585
SCRIB	81.6804	82.0707	100.36	145.547	123.193	100.649	1.4066	0.49221	0.00997889	0.0894103
UNC93B1	27.9075	32.6382	27.0343	18.4704	21.306	15.5608	-1.57606	-0.656325	0.0100049	0.0895849
IL24	0.340335	0	0	2.77056	1.09262	1.32432	12.521	3.64627	0.0100442	0.0897598
CLYBL	1.36134	2.535	1.85166	0.369408	0.546309	0	-5.38607	-2.42923	0.0100389	0.0897598
CERK	61.2603	66.8607	74.4368	101.587	99.9745	80.7838	1.40595	0.491545	0.0100392	0.0897598
gene:ENSG00000124593	5.7857	8.23876	2.222	1.66234	2.45839	1.98649	-2.70545	-1.43587	0.0100636	0.0898155
GTF2I	464.217	460.103	436.992	279.827	385.148	301.946	-1.40922	-0.4949	0.0100579	0.0898155
MXD3	22.4621	13.9425	13.332	7.38816	12.5651	7.61487	-1.8131	-0.858459	0.0100773	0.0898241
NEDD4	113.672	116.293	95.5458	210.378	127.563	133.426	1.45104	0.537082	0.0100777	0.0898241
DIRAS1	17.6974	18.6956	16.2946	10.3434	8.46778	12.25	-1.71622	-0.779237	0.0101058	0.0900159
PTRH2	10.8907	14.2594	7.77698	21.9798	12.2919	26.4865	1.82882	0.870913	0.0101308	0.0901792
NDUFAF4	4.76469	5.70376	5.18466	9.41991	9.01409	13.9054	1.98687	0.990501	0.0101483	0.0902759
NDST1	293.028	316.875	267.75	189.137	231.635	202.622	-1.41162	-0.497347	0.0101759	0.0904038
SLFN11	59.5586	56.0869	48.8839	96.9697	47.802	114.885	1.57654	0.656759	0.0101703	0.0904038
HHIP	18.0378	17.4281	9.62865	7.01876	11.4725	5.62838	-1.87155	-0.904234	0.0101851	0.0904264
BTG1	74.193	67.1776	91.1018	151.088	85.4973	104.622	1.4728	0.558564	0.0101991	0.0904919
PLEKHG4	36.0755	28.8357	29.2563	12.9293	30.047	8.27703	-1.83403	-0.875015	0.0102281	0.0906907
SLC16A4	6.12603	6.02063	5.92532	2.03175	3.27785	2.97973	-2.26073	-1.17679	0.0102377	0.0907163
SEC24A	58.878	70.0295	71.8445	176.577	46.1631	124.818	1.73238	0.792756	0.0102714	0.0908972
CNOT4	24.1638	23.4488	22.22	42.1125	31.1396	31.7838	1.52674	0.610454	0.0102692	0.0908972
UBE2J2	47.6469	58.6219	47.7729	75.7287	72.659	72.8379	1.43402	0.520062	0.0103005	0.091096
UBTF	128.647	126.433	116.284	74.8052	104.891	88.3987	-1.39284	-0.478031	0.0103172	0.0911843
FKBP7	36.4158	31.3707	34.0706	16.8081	14.204	32.1149	-1.63173	-0.706404	0.010375	0.091636
PET117	2.04201	0.316875	3.70333	3.32467	7.64832	6.62162	2.8929	1.53252	0.0104061	0.0918506
RANBP6	44.2436	44.9963	34.0706	18.4704	31.6859	30.4595	-1.55056	-0.632794	0.0105658	0.09314
SLX1A	47.6469	45.6301	42.9586	27.3362	38.5148	23.1757	-1.52793	-0.61158	0.0105612	0.09314
PCDHB14	3.40335	4.11938	2.59233	0.738816	1.09262	1.65541	-3.10549	-1.63482	0.0105977	0.0933223
TMEM120A	17.3571	17.4281	15.554	27.1515	31.9591	20.8581	1.5992	0.67735	0.0106001	0.0933223
ENTPD6	59.5586	62.4244	40.7366	95.492	87.6825	59.2635	1.49237	0.577604	0.0106173	0.0934132
AS3MT	0	4.43626	2.59233	0	0.819463	0	-7.91731	-2.98501	0.0106294	0.0934595
SLC25A51	8.50838	7.92188	4.81432	10.8975	15.5698	13.9054	1.83558	0.876235	0.0106436	0.0935236
UBA7	12.9327	11.0906	9.62865	4.6176	7.92147	5.62838	-1.91068	-0.934086	0.0106523	0.0935403
CENPA	3.74369	6.02063	7.77698	6.64935	17.4819	12.5811	2.07063	1.05007	0.0107175	0.0940525
HOXB2	23.4831	20.28	18.5166	30.8456	36.8758	27.4797	1.52889	0.612481	0.0107879	0.0946092
ARL6IP1	78.2771	75.0995	91.4721	80.9004	127.836	150.642	1.46352	0.549447	0.0108375	0.0949828
RAB4B-EGLN2	0	1.90125	5.18466	0	0	0	-68.149	-6.09062	0.0108574	0.095096
ADAMTS2	286.222	279.801	290.341	202.066	216.338	191.365	-1.40137	-0.486837	0.0108924	0.0953261
SMG1	213.73	191.076	178.13	331.174	232.181	267.183	1.42674	0.512724	0.0108976	0.0953261
AKAP12	120.819	141.643	79.6215	286.845	160.342	110.912	1.63259	0.70716	0.0109145	0.0954123
PKDREJ	2.04201	2.535	2.59233	0.369408	0.546309	0.993244	-3.94969	-1.98174	0.010924	0.0954347
SRRD	25.5251	20.9138	22.9606	11.0822	15.5698	18.2095	-1.59635	-0.674776	0.0109924	0.0959705
PDE7B	15.3151	10.7738	15.1836	3.87879	6.82886	11.2568	-1.93575	-0.952893	0.011001	0.0959841
PHLDA1	168.806	227.2	376.999	311.226	390.337	515.493	1.57418	0.654604	0.0110104	0.0960049
SREK1IP1	17.0168	15.8438	20.3683	33.062	24.0376	25.8243	1.59007	0.66909	0.0110299	0.0960512
DPY19L4	55.8149	44.9963	79.2512	26.7821	25.9497	56.2838	-1.65851	-0.729887	0.0110379	0.0960512
LTBR	79.9787	85.5563	104.063	154.967	117.183	106.608	1.41181	0.497546	0.0110438	0.0960512
SHMT1	17.6974	16.1606	14.8133	9.2352	12.0188	5.95946	-1.7541	-0.810734	0.0110245	0.0960512
GBE1	157.235	148.615	146.652	243.255	196.944	191.034	1.40085	0.486306	0.0110639	0.0961645
gene:ENSG00000259753	0	0	9.25831	0.738816	0	0	-10.4512	-3.38559	0.0111555	0.0968985
CCHCR1	38.4579	28.5188	27.4046	21.0563	23.7644	15.2297	-1.55535	-0.637241	0.0111659	0.0969271
ATF6	81.6804	81.437	71.4742	117.841	106.257	100.649	1.39454	0.479791	0.0111946	0.0971068
FAM117B	9.52938	10.4569	9.62865	3.13997	5.73624	6.62162	-2.05239	-1.03731	0.0112079	0.0971068
FOXP1	123.882	111.223	109.618	98.0779	67.4691	76.8108	-1.41328	-0.499043	0.0112043	0.0971068
TCFL5	17.0168	19.9631	18.1463	10.1587	13.6577	8.27703	-1.71145	-0.775216	0.0112185	0.0971365
HNRNPH3	67.7267	79.5357	75.1775	94.3838	118.003	101.642	1.4052	0.490778	0.0112531	0.0973133
ZMIZ1	367.221	385.32	331.077	276.687	276.978	211.23	-1.41384	-0.499617	0.0112473	0.0973133
ARHGAP1	120.138	129.919	136.282	81.4545	103.525	96.3446	-1.38262	-0.467403	0.0112908	0.097577
GPN2	31.3108	39.9263	30.7376	60.7676	42.0658	49.6622	1.5007	0.585632	0.0113083	0.0976665
SOD1	90.1888	90.6264	91.4721	136.496	125.105	109.257	1.37472	0.459133	0.0113256	0.0977544
KHDC4	57.1763	39.9263	55.5499	107.682	62.8255	60.9189	1.52344	0.607332	0.0114061	0.0983863
ATP23	3.40335	5.38688	2.96266	1.10822	1.91208	0.993244	-2.95726	-1.56426	0.0114185	0.0984312
ERCC2	75.214	74.1488	58.1422	54.303	45.8899	39.7297	-1.46946	-0.555288	0.0114292	0.0984615
GPT2	47.6469	53.8688	32.9596	93.4603	50.8067	65.223	1.55962	0.641193	0.0114684	0.098737
BOD1	49.0082	53.8688	43.6992	84.5945	57.9087	73.8311	1.4789	0.564529	0.0115233	0.0990217
LRP1	1529.81	1581.52	1585.39	1137.78	1149.98	1142.89	-1.36915	-0.45328	0.0115156	0.0990217
CEP112	7.48737	6.02063	4.07366	11.0822	10.9262	11.2568	1.86818	0.901634	0.0115184	0.0990217
ADGRB3	2.38235	2.535	2.59233	1.10822	0.273154	0	-4.13795	-2.04892	0.0115418	0.0990565
NCOA3	94.9535	100.766	93.3238	138.713	128.383	131.108	1.3815	0.466234	0.0115396	0.0990565
MICAL1	72.151	74.1488	61.1049	116.733	99.155	77.8041	1.4221	0.508025	0.0115599	0.0991492
NCOR1	137.155	155.269	128.135	231.065	225.352	146.007	1.4345	0.520547	0.0115744	0.0992116
TOP3A	35.0545	34.8563	28.8859	54.6724	41.2463	47.3446	1.45874	0.544727	0.0116697	0.0999653
PID1	13.6134	16.4775	24.0716	40.4502	16.9356	35.0946	1.71375	0.777156	0.0116797	0.0999884
EDEM2	18.0378	23.1319	19.6276	28.9985	31.4127	33.4392	1.51694	0.601166	0.0117095	0.10018
TAF13	16.6764	24.0825	23.331	34.7244	24.857	41.0541	1.56446	0.645669	0.011746	0.10043
PNO1	11.2311	16.1606	9.25831	19.5786	20.2134	23.1757	1.66825	0.738337	0.0117598	0.100485
OSBPL3	80.6594	81.1201	138.504	44.1443	86.5899	64.2298	-1.54192	-0.624728	0.0117785	0.100581
METRNL	24.1638	25.35	27.0343	54.303	40.7	25.1622	1.58335	0.662982	0.0117908	0.100624
NRSN2	60.2393	49.7494	50.7356	29.9221	42.8852	36.0879	-1.49019	-0.575501	0.0118213	0.100821
BRD2	285.881	304.834	286.267	640.554	302.109	365.514	1.49264	0.577871	0.0118499	0.101002
MT1F	1.70168	2.21813	4.81432	0.92352	0.819463	0.331081	-3.73982	-1.90297	0.0118732	0.101137
AATF	40.4999	45.6301	32.2189	65.3853	59.5476	48.3379	1.4695	0.55533	0.011907	0.101361
ZNF70	10.8907	13.3088	7.77698	17.3622	15.8429	24.5	1.76237	0.81752	0.0119806	0.101925
FAM13B	29.6091	31.6875	22.22	51.9019	27.3154	54.9595	1.60324	0.680989	0.0120511	0.102461
FGFR1OP2	21.1008	19.6463	25.5529	38.9726	30.5933	29.1351	1.51987	0.603952	0.0121188	0.102908
RNF6	40.4999	53.2351	44.0696	86.0721	55.9966	61.5811	1.48407	0.569559	0.0121188	0.102908
FUBP1	84.4031	79.2188	81.8435	147.024	97.2429	102.966	1.42114	0.507051	0.0121417	0.103038
PLEKHO2	79.6384	75.0995	57.0312	42.4819	45.8899	56.946	-1.47192	-0.557695	0.0121499	0.103044
CCDC163	0.68067	0.316875	2.222	4.98701	0.819463	6.95271	3.92747	1.9736	0.0121681	0.103134
PDGFC	88.1468	93.7951	96.6568	46.5454	71.2933	77.8041	-1.43451	-0.520553	0.0121871	0.103231
LTBP4	204.541	225.932	186.648	161.062	163.619	108.595	-1.42072	-0.50662	0.0121956	0.103239
TNFRSF1B	24.1638	32.3213	24.8123	8.8658	20.7597	18.8716	-1.7012	-0.766555	0.0122538	0.103584
FHL3	14.9747	16.4775	11.11	7.94228	10.1067	5.2973	-1.80236	-0.849889	0.0122462	0.103584
gene:ENSG00000285779	0	0	7.77698	0	0	0	-74.8538	-6.226	0.0122638	0.103584
MCM6	70.109	69.0788	38.1443	45.9913	37.9684	30.1284	-1.54835	-0.630733	0.0122758	0.103584
NOCT	3.74369	5.07001	3.70333	10.8975	5.18993	10.9257	2.14707	1.10237	0.0122895	0.103584
SRF	71.8107	69.3957	58.8829	55.9653	45.6168	34.1014	-1.45939	-0.545363	0.0122823	0.103584
CCDC106	16.3361	18.0619	18.887	8.68109	13.6577	9.27027	-1.71247	-0.776082	0.0122858	0.103584
NAT1	8.16804	5.70376	5.18466	1.10822	3.0047	4.30406	-2.42628	-1.27874	0.0123227	0.1038
GTPBP1	56.1553	54.8194	60.7345	101.403	68.2886	74.4933	1.43198	0.518009	0.0123371	0.103857
DERL2	40.4999	40.56	39.9959	56.7042	45.0705	78.4663	1.48139	0.566948	0.0123795	0.104123
RTEL1	32.3318	29.4694	24.4419	44.6984	48.3483	36.0879	1.50463	0.58941	0.012384	0.104123
PTDSS2	22.8024	30.7369	27.4046	40.6349	40.9731	37.4122	1.47396	0.559699	0.012439	0.104521
ABHD17B	9.18905	10.7738	12.221	17.9163	18.3013	18.5405	1.69933	0.764967	0.0124741	0.104752
RNASEH1	52.0713	58.9388	52.2169	77.7604	55.9966	109.257	1.48405	0.569538	0.0124921	0.104839
MXD1	17.6974	14.2594	17.4056	47.8384	12.0188	31.7838	1.86201	0.896857	0.0125489	0.105196
MAGED2	382.196	384.053	375.888	263.757	277.525	285.392	-1.38716	-0.47213	0.0125502	0.105196
PUM3	22.4621	24.3994	22.5903	37.8643	26.496	41.7162	1.52303	0.606946	0.0125624	0.105234
BTD	38.1175	38.9757	39.2553	20.8716	32.2322	25.8243	-1.49518	-0.580315	0.0126188	0.105641
PGAM5	18.7184	20.5969	12.9616	26.4127	33.0517	24.5	1.59241	0.67121	0.0126364	0.105724
ST6GALNAC4	15.9957	12.9919	11.4803	22.1645	19.1208	22.8446	1.5804	0.660294	0.0126543	0.105809
ZNF24	53.7729	54.5026	60.3642	83.671	60.6403	98.3311	1.43705	0.523111	0.0127105	0.106214
CBLL1	16.3361	13.3088	20.3683	31.3997	16.1161	36.75	1.68609	0.753682	0.0127471	0.106455
ARF5	65.004	70.0295	67.0302	43.7749	58.455	36.4189	-1.45399	-0.540019	0.0127651	0.106539
WASHC2C	95.9745	82.3876	85.1765	150.349	126.47	92.7027	1.40799	0.493635	0.0128013	0.106777
DNAJC6	0.68067	1.58438	0.370333	2.58586	2.73154	4.96622	3.45523	1.78878	0.0128233	0.106895
SAR1B	42.5419	37.7082	37.7739	58.7359	48.8946	63.2365	1.44484	0.530905	0.0128665	0.107189
ING1	13.6134	11.7244	15.9243	27.5209	19.1208	18.2095	1.60785	0.685137	0.0129009	0.107411
SPRYD3	28.5881	38.6588	33.3299	44.329	59.0013	44.696	1.4653	0.551199	0.0129123	0.10744
CLDN1	0.340335	0.316875	2.96266	3.87879	4.09731	3.64189	3.33862	1.73925	0.0129553	0.107709
TWIST1	28.9285	34.2225	31.4783	20.8716	22.3987	20.527	-1.48651	-0.571925	0.0129605	0.107709
gene:ENSG00000268173	0	7.28813	0	0	0	0	-70.7122	-6.14389	0.0129901	0.107889
DEPP1	8.50838	7.28813	9.25831	4.80231	1.09262	5.2973	-2.20915	-1.14349	0.0130098	0.107988
PLEKHA7	7.48737	6.65438	1.85166	3.32467	0.273154	0.993244	-3.2815	-1.71435	0.0130418	0.108187
TGS1	21.1008	19.3294	20.3683	34.355	25.1302	31.4527	1.51363	0.598014	0.0130586	0.108261
RTCA	19.7394	20.5969	24.4419	32.6926	25.9497	40.723	1.52693	0.610635	0.0130963	0.108404
gene:ENSG00000272410	1.36134	12.675	4.81432	18.8398	14.4772	9.27027	2.24923	1.16943	0.0130997	0.108404
SLC12A4	100.399	91.577	114.803	164.571	122.646	136.737	1.38852	0.473543	0.0130965	0.108404
GMPR	0.68067	1.2675	2.59233	0	0.273154	0.331081	-7.55715	-2.91784	0.013118	0.10849
SYNGR2	7.82771	7.60501	7.40665	18.6551	12.2919	9.60136	1.81695	0.861522	0.0131313	0.108534
ATP6V1G2	2.72268	2.535	1.85166	0.184704	0	1.65541	-4.56334	-2.19009	0.0131832	0.108831
SUOX	14.9747	17.1113	27.4046	7.57287	15.5698	9.60136	-1.82358	-0.866777	0.0131796	0.108831
DTNA	3.40335	4.75313	8.88798	9.60461	7.64832	18.2095	2.06648	1.04718	0.0131969	0.108879
POGLUT3	139.537	141.326	118.877	88.2886	113.086	87.0744	-1.38854	-0.473569	0.0132155	0.108966
GDNF	0	0.633751	1.48133	6.46464	4.37047	0	5.01114	2.32514	0.0133169	0.109736
RALGDS	36.0755	38.9757	42.2179	25.8586	32.2322	17.8784	-1.52819	-0.611825	0.0133557	0.109922
TRMT1	29.9495	32.955	21.4793	57.443	39.8805	33.7703	1.56053	0.642034	0.0133542	0.109922
LRRN3	1.70168	2.535	2.222	0	0.273154	1.32432	-4.89768	-2.2921	0.0134338	0.110499
RILPL1	18.7184	17.4281	18.5166	37.3102	22.3987	26.1554	1.59128	0.670183	0.0134436	0.110513
C8orf88	6.12603	8.55563	10.7396	15.1457	11.7456	17.8784	1.7559	0.812208	0.0134707	0.110669
H2AC6	4.08402	3.8025	3.70333	11.8211	1.91208	16.223	2.56346	1.35809	0.0135209	0.111015
PRKAB2	64.6637	63.0582	62.9565	41.0043	42.8852	54.2973	-1.4088	-0.494468	0.0135576	0.111249
SNX29	54.1133	57.9882	55.5499	40.0808	38.2416	38.4054	-1.43111	-0.517132	0.0135933	0.111421
GART	61.6006	53.2351	52.5872	82.5627	80.8537	68.5338	1.4001	0.485529	0.0135949	0.111421
POM121	88.1468	106.787	88.1392	153.489	139.855	102.304	1.40152	0.486988	0.0136173	0.111537
RBM14-RBM4	0	0.950626	3.70333	4.24819	7.37517	3.31081	3.22113	1.68757	0.0136262	0.111544
UGGT1	183.781	191.71	198.869	259.509	246.112	290.358	1.38207	0.466829	0.0136794	0.111912
NBPF10	22.8024	25.0332	29.9969	47.469	34.1443	33.7703	1.50367	0.588485	0.0137931	0.112774
MFSD6	5.10503	8.23876	5.92532	2.03175	1.91208	4.96622	-2.30998	-1.20788	0.0138146	0.112882
POM121C	70.109	62.1076	70.3632	104.543	84.4047	88.3987	1.3823	0.467075	0.0138594	0.113181
FIGN	7.82771	6.65438	5.18466	11.2669	13.6577	11.2568	1.8138	0.859018	0.0138826	0.113303
RBCK1	55.4746	70.3463	56.6609	81.8239	94.5114	82.4392	1.41028	0.49598	0.0139873	0.114089
ZCCHC24	137.495	127.701	138.875	61.5065	128.929	87.7365	-1.45536	-0.541372	0.0139998	0.114123
NUDT18	11.5714	6.97126	9.99898	4.98701	3.82416	5.2973	-1.99641	-0.997405	0.0140629	0.114568
CNOT3	55.1343	57.3544	59.9939	116.179	67.196	68.2027	1.46569	0.551583	0.0140924	0.114741
gene:ENSG00000284773	4.42436	3.8025	5.92532	1.84704	2.18523	1.32432	-2.5353	-1.34215	0.0141239	0.114928
ETFB	47.6469	64.9594	65.9192	25.8586	47.2557	45.3581	-1.51734	-0.601542	0.014143	0.115015
STXBP3	45.6049	46.5807	45.5509	27.7056	32.5054	37.4122	-1.44893	-0.534986	0.0141607	0.11509
gene:ENSG00000287908	3.74369	4.11938	3.70333	1.47763	0.546309	1.98649	-2.87435	-1.52324	0.0141845	0.115216
CHST10	16.6764	17.4281	17.776	8.8658	11.4725	11.5878	-1.66823	-0.738317	0.0142156	0.115399
PLEKHM2	97.6761	96.0132	109.989	202.99	122.1	110.912	1.44008	0.526154	0.0142375	0.11544
GPAT3	0.68067	1.58438	2.96266	6.27994	6.28255	1.98649	2.84207	1.50694	0.0142375	0.11544
ZBTB14	14.6344	13.3088	16.2946	8.68109	7.64832	10.2635	-1.67119	-0.740871	0.0142989	0.115868
MANSC1	4.42436	4.11938	10.3693	1.29293	4.37047	1.65541	-2.58431	-1.36978	0.0143205	0.115975
PLCB4	43.9032	37.7082	34.0706	73.8816	49.4409	47.3446	1.48507	0.570527	0.0143395	0.11606
POFUT2	95.2938	90.9432	90.3611	147.209	115.817	113.561	1.37023	0.454416	0.0143552	0.116118
SLC25A42	17.0168	16.7944	23.7013	10.8975	10.9262	12.25	-1.68702	-0.754474	0.0143773	0.116228
CYP20A1	18.0378	21.5475	17.776	29.9221	22.945	36.4189	1.54152	0.624358	0.0144365	0.116471
ATG3	39.4789	40.8769	46.2916	61.6912	60.9134	54.2973	1.41307	0.49883	0.0144559	0.116471
CAMK2A	2.72268	2.85188	1.48133	0.184704	1.09262	0.662162	-3.94891	-1.98146	0.0144484	0.116471
ZNF12	23.8235	21.8644	30.3673	43.7749	25.9497	48.0068	1.55031	0.63256	0.0144414	0.116471
SPATA5L1	6.46637	7.92188	8.88798	15.5151	10.1067	14.8987	1.76183	0.817079	0.0144586	0.116471
MT-ND2	2433.05	2540.07	2238.66	1705.93	1837.51	1759.37	-1.36074	-0.444393	0.0144492	0.116471
FBXL5	63.6426	71.297	68.1412	29.9221	49.7141	57.9392	-1.48906	-0.574404	0.0145017	0.116749
ASAP1	130.008	140.693	104.063	230.326	145.591	155.608	1.42024	0.506132	0.0145227	0.116784
OCEL1	8.50838	7.60501	8.14732	2.95527	5.18993	4.30406	-2.0242	-1.01735	0.0145231	0.116784
CABLES1	3.74369	3.16875	2.96266	12.3752	3.27785	7.28379	2.34296	1.22833	0.0145535	0.11696
ANAPC7	31.3108	31.3707	32.9596	39.7114	55.9966	45.027	1.46161	0.547559	0.0145741	0.117056
NCEH1	27.2268	27.2513	23.7013	35.2785	53.2651	30.4595	1.52039	0.604445	0.0145964	0.117167
GFOD1	2.72268	1.2675	1.48133	7.38816	3.27785	3.64189	2.67934	1.42188	0.0146226	0.11725
ANO8	43.2225	39.6094	47.7729	26.5974	34.4174	27.8108	-1.47765	-0.563304	0.0146241	0.11725
INSC	0	1.2675	1.111	5.72583	1.63893	1.98649	3.90953	1.967	0.0146401	0.11731
PPL	5.44536	3.8025	4.07366	0.738816	3.27785	0	-3.2474	-1.69929	0.014692	0.117641
ADA	17.3571	11.7244	5.92532	7.01876	5.46309	5.2973	-1.94923	-0.962905	0.0146987	0.117641
TADA2B	22.4621	20.9138	26.6639	39.342	28.408	36.4189	1.50396	0.58877	0.0147419	0.117849
ARPC5L	33.0125	35.8069	25.5529	52.0866	45.3436	40.0608	1.46549	0.551383	0.0147385	0.117849
WWC1	2.38235	6.33751	0.740665	13.114	6.5557	4.63514	2.54529	1.34783	0.0147811	0.118093
LYRM9	2.04201	2.21813	4.07366	0.369408	1.36577	0.662162	-3.54951	-1.82762	0.0147963	0.118145
BBOF1	9.52938	6.97126	8.14732	4.06349	2.45839	5.62838	-2.054	-1.03844	0.0148373	0.118404
PGAP3	14.6344	15.21	15.1836	7.38816	10.1067	10.2635	-1.67625	-0.745233	0.0148735	0.118623
TMEM63A	21.1008	18.6956	19.6276	36.7561	25.4033	26.8176	1.52182	0.605796	0.0148901	0.118686
GHITM	126.945	140.693	155.54	192.462	168.263	228.115	1.38983	0.474912	0.0149227	0.118876
PINK1	140.899	143.545	115.544	94.1991	117.183	74.4933	-1.39742	-0.482763	0.0149555	0.119068
ZMYM6	23.4831	23.7657	20.3683	8.8658	10.3799	21.8514	-1.67832	-0.747015	0.0149711	0.119077
GDAP2	9.86972	12.9919	9.99898	17.3622	16.9356	23.1757	1.69468	0.761015	0.0149818	0.119077
RAET1G	2.72268	2.535	1.111	0.554112	0.546309	0.331081	-4.13722	-2.04866	0.0149828	0.119077
NPIPB11	6.46637	6.02063	2.222	9.41991	13.6577	7.28379	2.03851	1.02751	0.0149926	0.119085
IL7R	3.40335	5.07001	3.33299	8.49639	6.82886	8.93919	2.02573	1.01844	0.0150101	0.119155
LY6G5B	24.1638	29.4694	35.9223	19.2092	17.2087	22.1824	-1.53241	-0.615803	0.0150355	0.119288
MCM2	78.6174	82.3876	49.9949	53.7489	52.7188	31.4527	-1.52419	-0.608039	0.0150621	0.119429
CUL4B	156.894	145.763	157.762	101.957	91.5067	138.723	-1.39115	-0.47628	0.0150823	0.11952
BMPR1B	4.42436	5.07001	9.62865	3.13997	1.63893	3.31081	-2.30668	-1.20582	0.0151457	0.119952
NPIPA1	28.5881	19.0125	14.443	49.316	27.8617	24.5	1.64629	0.719219	0.0152123	0.12041
TNIP3	0	0.316875	0	2.03175	2.45839	0.331081	11.423	3.51387	0.0152593	0.120577
ACADSB	25.5251	20.9138	28.5156	8.8658	18.0282	19.2027	-1.65182	-0.724059	0.0152599	0.120577
CAVIN1	1030.19	1078.64	718.816	700.583	805.532	481.061	-1.42268	-0.508609	0.0152597	0.120577
IFT81	13.2731	15.21	18.1463	6.46464	9.5604	11.9189	-1.7311	-0.791687	0.0152849	0.120705
TMEM117	13.6134	17.745	13.7023	7.38816	7.10201	12.5811	-1.72986	-0.790654	0.0152958	0.120721
TRIP6	105.844	98.8651	99.2491	72.0346	83.3121	64.5608	-1.37746	-0.462006	0.0153665	0.121139
RFXANK	34.3738	27.2513	23.331	16.254	21.8523	16.8851	-1.55715	-0.638909	0.0153599	0.121139
TMEM50B	29.6091	30.42	21.109	31.3997	42.6121	50.3243	1.51268	0.597108	0.0153901	0.121254
SEPTIN11	602.733	642.306	587.347	364.421	475.835	487.021	-1.38318	-0.467988	0.0154267	0.121424
TCP1	205.562	204.068	177.76	287.4	251.575	270.162	1.3785	0.463102	0.0154294	0.121424
CDK11A	34.0335	38.3419	27.7749	59.6594	48.0752	38.4054	1.46781	0.553663	0.0154867	0.121642
OXSR1	89.5081	92.5276	79.6215	140.375	110.901	106.277	1.37287	0.457195	0.0154911	0.121642
LFNG	3.74369	4.11938	3.33299	0.92352	1.63893	1.65541	-2.78948	-1.48	0.0154693	0.121642
ASMTL	43.5629	33.9057	45.9212	29.9221	28.9544	23.1757	-1.47545	-0.561154	0.0154928	0.121642
RARA	20.7604	21.2306	22.5903	39.342	33.8711	23.5068	1.52056	0.604607	0.0155084	0.121695
LMLN2	0.340335	1.58438	1.85166	0	0	0.331081	-10.9353	-3.45093	0.0155804	0.122184
GIPR	1.36134	1.90125	0.740665	0.369408	0	0	-6.99324	-2.80596	0.0155887	0.122184
DDHD2	55.4746	50.0663	54.8092	38.2337	37.149	35.7568	-1.43157	-0.517596	0.0156028	0.122225
UIMC1	23.4831	23.4488	20.3683	38.7879	32.7785	27.1487	1.49045	0.575747	0.0156265	0.12234
FOXF1	74.8737	89.6757	79.6215	100.479	142.86	100.98	1.4079	0.493549	0.0156554	0.122497
FUT8	34.3738	31.0538	28.5156	17.5469	25.6765	20.196	-1.50502	-0.589786	0.0156672	0.122519
KIAA1143	43.2225	45.3132	52.9576	27.5209	35.7832	35.7568	-1.4492	-0.535253	0.0158077	0.123383
MITF	8.50838	8.55563	19.998	7.75757	3.55101	6.95271	-2.00007	-1.00005	0.0157935	0.123383
RAPGEF2	82.7014	91.8939	85.9172	162.54	102.433	99.6555	1.40462	0.490179	0.0158089	0.123383
TXNDC17	37.4369	47.5313	47.0322	22.7186	30.047	36.4189	-1.50317	-0.588003	0.0158139	0.123383
SPINT2	2.38235	2.21813	0.740665	0.369408	0.546309	0	-5.07491	-2.34338	0.0158324	0.123456
CMKLR2	15.9957	12.0413	9.99898	16.8081	12.0188	42.7095	1.86543	0.899504	0.0158613	0.12354
ARHGEF25	35.0545	36.4407	28.8859	19.0245	24.857	25.4933	-1.48701	-0.57241	0.0158556	0.12354
PSMC3IP	9.86972	12.3581	8.14732	23.8268	17.4819	11.5878	1.75999	0.815571	0.0159166	0.123884
ZNF417	7.82771	8.55563	7.77698	11.6364	12.0188	19.8649	1.75192	0.808937	0.0159235	0.123884
UBB	341.016	363.773	349.224	615.249	409.458	440.007	1.39115	0.476276	0.0159448	0.123908
FRMPD3	3.06302	1.58438	0	0.184704	0.273154	0	-8.1046	-3.01874	0.015941	0.123908
MAPK13	16.3361	13.6256	14.8133	19.3939	25.4033	26.1554	1.54848	0.630849	0.0159877	0.12403
TSR1	58.1973	70.6632	55.5499	93.645	86.5899	76.8108	1.39921	0.484617	0.0159793	0.12403
BACH1	54.7939	49.1157	48.8839	86.2568	59.8208	71.1825	1.43017	0.516184	0.0159802	0.12403
DNAJB6	110.949	115.66	86.6578	210.932	134.392	107.932	1.44943	0.535482	0.0160043	0.124054
BORCS5	12.2521	9.18939	14.443	4.80231	7.37517	8.27703	-1.81166	-0.857315	0.0160091	0.124054
NUP58	51.7309	50.7001	49.9949	98.2626	49.1678	77.473	1.47921	0.564824	0.0160296	0.124143
LBR	27.2268	24.7163	30.3673	28.4444	48.6215	50.6554	1.54012	0.62304	0.0160646	0.124344
gene:ENSG00000284431	26.5461	16.1606	8.14732	48.3925	18.5745	26.1554	1.83303	0.874232	0.0160801	0.124393
SREBF1	40.1595	38.9757	42.5882	64.4617	53.8114	51.6487	1.41945	0.505335	0.0162451	0.125527
PIM3	29.6091	31.6875	39.6256	75.544	34.4174	47.3446	1.56673	0.647758	0.0162361	0.125527
MTA3	35.0545	39.2925	48.1432	26.0433	28.9544	29.4662	-1.45882	-0.544801	0.0162599	0.125571
ZZZ3	55.4746	60.8401	64.8082	100.479	71.0201	82.1081	1.40883	0.494497	0.0163982	0.126281
CCNYL1	20.4201	21.5475	16.2946	25.4892	25.1302	40.723	1.54444	0.627087	0.0163923	0.126281
NUDT16	56.8359	55.1363	57.4015	32.3232	37.4221	49.3311	-1.44579	-0.531856	0.0163776	0.126281
FIBP	47.9872	66.2269	62.2159	34.9091	44.5242	45.027	-1.43143	-0.517455	0.0163968	0.126281
EHD2	602.733	613.471	489.58	335.053	543.577	317.838	-1.42588	-0.51185	0.0163812	0.126281
SLX1B	1.02101	0	2.222	4.4329	0	10.9257	4.63684	2.21314	0.0164268	0.12643
LYAR	9.86972	8.55563	7.03632	16.0693	14.4772	11.5878	1.69073	0.757649	0.0164371	0.126437
EIF1	456.049	507.001	444.399	944.207	495.229	584.027	1.43831	0.524378	0.016474	0.12665
STEAP1	5.10503	6.02063	4.07366	9.2352	10.653	9.27027	1.88441	0.914114	0.0164966	0.126681
S1PR3	53.0923	67.8113	62.2159	59.1053	105.164	103.628	1.45678	0.542781	0.0164949	0.126681
CYP3A7	0	1.58438	2.59233	0	0	0.331081	-11.5138	-3.52529	0.0165979	0.127387
KHDRBS3	6.46637	3.8025	6.66599	17.3622	10.653	5.62838	2.02492	1.01787	0.0166095	0.127405
RMDN1	33.0125	35.1732	51.4762	18.8398	29.5007	30.4595	-1.53012	-0.613647	0.0166279	0.127456
SH3BP1	12.2521	14.2594	12.5913	7.38816	8.46778	7.28379	-1.6973	-0.763238	0.0166349	0.127456
PTPN4	14.9747	12.675	13.332	21.4257	18.8476	23.1757	1.54347	0.626177	0.0167046	0.127919
YARS1	196.033	195.195	158.132	351.122	219.616	209.574	1.42218	0.508104	0.0167196	0.127962
CKS1B	32.6722	37.3913	48.8839	36.3867	85.4973	63.8987	1.55828	0.639951	0.0167591	0.128188
KIF1C	147.025	158.755	149.985	236.791	234.093	161.899	1.39148	0.476621	0.0167679	0.128188
ZNF618	67.046	51.3338	62.5862	34.9091	50.8067	41.3852	-1.43075	-0.516769	0.0168462	0.128714
G2E3	11.9117	12.0413	10.7396	11.2669	18.0282	34.4324	1.81278	0.858201	0.0168697	0.128807
PEAK1	113.332	113.758	92.9535	189.876	125.105	130.115	1.39395	0.479178	0.0168772	0.128807
LHFPL6	20.0798	20.28	25.1826	33.062	31.1396	31.1216	1.47054	0.556346	0.0169008	0.128914
NIPSNAP2	33.0125	43.7288	48.5136	22.3492	27.3154	34.7635	-1.50113	-0.586048	0.0169121	0.128929
ADGRL1	9.52938	6.97126	10.3693	4.98701	4.37047	3.97297	-1.94498	-0.959755	0.0169574	0.129202
IWS1	60.92	57.9882	41.4772	72.2193	87.9557	67.5406	1.41621	0.502035	0.0169966	0.129284
TRAF3IP2	19.3991	18.3788	15.9243	9.0505	14.204	9.60136	-1.66674	-0.737025	0.0169957	0.129284
ECD	21.1008	21.2306	30.7376	37.4949	33.598	35.0946	1.4779	0.563553	0.0169946	0.129284
MDGA1	7.82771	6.65438	4.81432	2.95527	4.09731	1.65541	-2.16471	-1.11417	0.0170205	0.129394
JDP2	30.2898	25.9838	13.332	52.8254	26.2228	34.7635	1.63659	0.710696	0.0170835	0.129801
MCUR1	31.3108	38.025	36.2926	55.4112	41.2463	57.2771	1.45723	0.54323	0.0171633	0.130334
TMEM51	4.76469	5.07001	2.96266	7.94228	9.5604	8.60811	1.98234	0.987207	0.0172457	0.130846
KDSR	47.6469	52.2844	67.0302	101.587	53.5382	89.3919	1.46768	0.55354	0.0172498	0.130846
ERBB2	68.067	74.7826	63.6972	40.0808	58.455	46.3514	-1.43662	-0.522677	0.0172884	0.131065
KLHL29	15.9957	19.3294	11.11	27.1515	22.1255	23.5068	1.56743	0.648401	0.0173295	0.131304
NOL4L	46.2856	44.0457	45.9212	33.4314	29.5007	32.1149	-1.42288	-0.508817	0.0174641	0.13225
G6PD	209.646	187.907	204.794	254.522	329.424	250.297	1.38502	0.469905	0.0174842	0.132329
RANBP17	27.2268	22.815	28.1453	16.4387	12.5651	21.5203	-1.56211	-0.643495	0.0175563	0.132801
SERP1	152.47	164.141	131.098	200.404	139.309	339.027	1.51438	0.598726	0.0175953	0.132949
EID1	99.0375	107.738	146.652	43.7749	76.7564	110.912	-1.53143	-0.614883	0.0175946	0.132949
LIX1L	55.8149	47.8482	57.4015	26.5974	41.7926	42.0473	-1.47391	-0.559645	0.0176403	0.133067
C7orf26	22.1218	22.4982	18.887	33.6161	30.5933	28.1419	1.47008	0.555896	0.0176385	0.133067
SEPHS2	57.1763	62.4244	51.4762	77.7604	72.1127	88.3987	1.3785	0.463103	0.0176355	0.133067
MGST1	189.907	196.463	186.648	229.587	238.464	330.088	1.38935	0.474415	0.0177365	0.13372
POLE2	11.9117	12.0413	8.51765	5.35642	6.28255	6.95271	-1.80268	-0.850146	0.0178502	0.134502
TAGLN2	512.545	497.177	470.693	355.925	437.32	275.129	-1.38479	-0.469666	0.017901	0.134685
PPP2CB	75.8947	70.6632	67.7709	106.02	91.5067	92.0406	1.36396	0.447799	0.017904	0.134685
MT-ND5	2859.49	2806.25	2415.31	1656.06	2494.45	1710.37	-1.37891	-0.463533	0.0178997	0.134685
FBXO42	24.1638	35.49	29.9969	50.6089	38.2416	43.0406	1.47779	0.563445	0.0179254	0.134772
RCAN3	23.8235	33.9057	41.8476	16.8081	22.1255	26.4865	-1.5366	-0.619741	0.0179899	0.134797
SORT1	110.609	130.553	137.764	93.8297	99.155	86.7433	-1.34973	-0.432667	0.0179922	0.134797
DENND4B	50.0292	50.0663	44.8102	66.8629	76.7564	61.9122	1.41692	0.502756	0.0179887	0.134797
CEP170	114.012	107.104	95.5458	155.706	139.309	132.101	1.35538	0.4387	0.0179396	0.134797
gene:ENSG00000285976	10.5504	22.1813	32.5893	43.2208	31.1396	32.446	1.64127	0.71481	0.0180007	0.134797
PUS7	8.84871	11.7244	7.77698	19.7633	12.0188	16.223	1.70136	0.766686	0.0179936	0.134797
NRF1	12.2521	12.3581	14.0726	17.7316	26.7691	17.8784	1.60643	0.683862	0.0179731	0.134797
SLC2A6	7.48737	7.60501	4.07366	12.5599	10.1067	11.5878	1.78022	0.832052	0.0180178	0.134797
TUB	31.6512	25.35	24.4419	15.3304	20.4866	18.2095	-1.53719	-0.620295	0.0180101	0.134797
CYCS	45.6049	59.2557	37.7739	70.0029	51.0799	93.696	1.49983	0.584803	0.0180364	0.134863
MXRA7	275.331	272.196	192.943	194.309	191.208	144.683	-1.39496	-0.480226	0.0180817	0.135128
PPARGC1A	2.04201	3.16875	1.48133	0.554112	0.273154	0.993244	-3.76454	-1.91247	0.0180952	0.135154
TM6SF1	0.340335	2.85188	7.40665	9.60461	4.91678	11.9189	2.49403	1.31848	0.0181055	0.135158
FBLN7	5.44536	5.07001	9.99898	2.77056	2.73154	4.30406	-2.1186	-1.08311	0.0181341	0.135223
SFI1	13.2731	10.7738	11.11	20.5022	23.2181	13.9054	1.66158	0.732559	0.0181262	0.135223
CENPF	153.151	128.335	136.653	103.434	383.509	207.257	1.65931	0.730586	0.0181952	0.135604
MTFP1	8.84871	5.38688	2.96266	10.3434	10.653	12.25	1.87744	0.90877	0.0182269	0.135744
PRAF2	56.1553	67.8113	61.1049	44.329	43.4315	46.6825	-1.38399	-0.468838	0.0182339	0.135744
LSG1	31.6512	36.7575	37.7739	52.456	49.4409	48.3379	1.42567	0.511637	0.0182666	0.135914
SPEN	132.39	138.158	107.767	226.632	200.768	115.216	1.43614	0.522193	0.0183011	0.136022
IL11RA	10.8907	12.3581	8.51765	4.6176	6.28255	7.28379	-1.83955	-0.879351	0.0182967	0.136022
VCP	564.956	588.438	528.465	800.138	717.849	751.554	1.35011	0.43308	0.0183139	0.136043
LRRTM3	1.36134	1.58438	1.48133	0	0	0	-43.1916	-5.43268	0.0183601	0.136312
SLC30A1	29.9495	29.1525	22.22	57.8124	24.5839	47.0135	1.59312	0.671857	0.0184046	0.136427
COG1	59.5586	59.2557	63.6972	99.0014	66.1033	90.3852	1.40445	0.490003	0.0184056	0.136427
ZNF222	4.42436	2.85188	1.111	6.46464	4.91678	7.94595	2.22347	1.15281	0.0184021	0.136427
TCEA2	16.6764	17.4281	30.3673	13.8528	11.4725	14.2365	-1.6179	-0.694124	0.0184305	0.136538
RXRA	108.567	96.9639	92.2128	65.7547	85.7704	64.5608	-1.38013	-0.464801	0.0184692	0.13675
FGD6	10.8907	12.0413	12.9616	7.38816	7.10201	5.95946	-1.71682	-0.779737	0.0184972	0.136884
RHOD	1.02101	2.21813	3.33299	5.72583	5.18993	4.30406	2.38471	1.25382	0.0185264	0.137025
FEM1C	34.3738	45.6301	33.3299	57.0736	47.2557	59.9257	1.44182	0.527887	0.0186005	0.137499
ARL2BP	72.4914	72.2476	92.5831	51.3477	48.0752	69.8581	-1.40854	-0.494202	0.0186267	0.137617
AP1AR	14.2941	12.3581	19.6276	30.2915	15.8429	28.8041	1.62859	0.703623	0.018685	0.137845
ZNF622	29.9495	36.7575	37.7739	69.8181	34.9637	53.3041	1.51884	0.60297	0.0186858	0.137845
CCDC59	9.52938	14.5763	16.2946	29.368	15.2966	20.527	1.62916	0.704125	0.0186878	0.137845
GLMN	9.52938	10.14	10.7396	3.50938	5.18993	8.27703	-1.91078	-0.93416	0.0187353	0.138121
RCN3	289.285	282.653	259.973	226.078	201.861	175.142	-1.37337	-0.45772	0.0187881	0.138436
HADHB	88.1468	89.9926	114.062	109.899	133.846	163.554	1.39028	0.475373	0.0188194	0.138457
ZFR	127.285	119.145	104.804	164.387	145.045	167.527	1.35576	0.439103	0.0188215	0.138457
SLC35B1	38.1175	42.4613	32.2189	57.9971	46.4362	57.2771	1.43072	0.516739	0.0188188	0.138457
AMPD3	12.2521	20.5969	18.887	26.5974	26.7691	26.8176	1.54412	0.626785	0.0188348	0.138481
CCDC85A	1.36134	0.950626	2.222	0	0	0	-43.196	-5.43283	0.0189274	0.139072
CTNNAL1	85.4241	77.9513	72.2149	53.9336	67.7423	47.6757	-1.38954	-0.47461	0.0189356	0.139072
KLHL33	1.36134	0.950626	2.222	0	0	0	-43.196	-5.43283	0.0189581	0.139162
ARHGEF6	20.0798	15.8438	22.22	8.68109	14.7503	12.25	-1.65708	-0.728642	0.0189889	0.139313
SEC61A1	674.884	664.805	629.936	1003.68	707.47	973.048	1.36293	0.446709	0.0190055	0.13936
ZC3H18	55.4746	60.8401	51.1059	84.5945	80.8537	64.8919	1.3848	0.469673	0.0190245	0.139424
SOCS5	43.2225	44.9963	55.1796	23.4574	37.149	38.0743	-1.46827	-0.55412	0.0190634	0.13956
NFIB	0	0	0	4.6176	3.27785	0	72.9605	6.18904	0.0190608	0.13956
RMND5B	14.6344	9.82314	16.665	21.241	19.394	22.8446	1.55583	0.637688	0.0190916	0.139617
MMP17	16.3361	20.5969	10.3693	31.9538	25.9497	18.2095	1.61366	0.690339	0.0190818	0.139617
RALA	68.067	76.0501	67.7709	121.905	80.0342	91.3784	1.38977	0.47485	0.0191041	0.139633
ARHGAP29	17.0168	20.5969	10.3693	26.4127	22.3987	27.1487	1.56577	0.64687	0.0191182	0.139661
ZNF18	11.9117	9.82314	11.4803	4.4329	9.01409	4.63514	-1.85867	-0.89427	0.0191591	0.139885
SURF2	4.08402	4.11938	2.96266	5.72583	11.4725	6.62162	2.08424	1.05952	0.0191891	0.140029
SLC27A4	26.5461	35.1732	17.776	39.8961	48.0752	32.777	1.51409	0.598449	0.0192792	0.140612
CDC20	34.3738	32.955	41.1069	24.9351	87.1362	69.5271	1.67039	0.740189	0.0193097	0.140675
TRIM22	17.0168	17.1113	34.4409	4.80231	13.9309	18.5405	-1.85558	-0.891868	0.0193287	0.140675
CSNK1G1	35.3948	31.6875	30.7376	62.2453	33.0517	48.3379	1.47487	0.560585	0.0193134	0.140675
GP1BB	0	0.633751	1.48133	4.24819	1.91208	1.65541	3.81787	1.93277	0.0193291	0.140675
CYB5D2	8.84871	9.50626	17.4056	5.54112	5.73624	8.27703	-1.84551	-0.884018	0.0193539	0.14078
STXBP6	13.9537	16.4775	14.443	4.6176	10.3799	11.5878	-1.74149	-0.800319	0.0193936	0.140994
QARS1	166.083	156.536	198.498	131.509	121.007	130.446	-1.35668	-0.440083	0.0194287	0.141081
ZHX2	8.84871	11.7244	6.29565	22.7186	7.10201	21.1892	1.8921	0.919991	0.0194366	0.141081
BAHCC1	58.1973	58.6219	55.9202	38.6032	49.9872	32.1149	-1.42657	-0.512551	0.0194318	0.141081
BRI3	53.7729	51.0169	69.2522	110.453	76.4832	62.5744	1.44175	0.527819	0.019471	0.141128
CALD1	409.083	397.995	380.332	319.353	282.442	266.851	-1.36097	-0.44463	0.0194629	0.141128
RBM26	46.9662	42.4613	48.8839	66.4935	57.6356	64.5608	1.37526	0.459701	0.0194741	0.141128
ZC3H11A	96.9955	120.096	140.356	262.28	118.822	149.98	1.48801	0.573388	0.0195566	0.141311
FBXL7	33.0125	27.5682	23.331	16.4387	21.5792	17.8784	-1.52129	-0.605293	0.0195543	0.141311
TAX1BP1	121.84	122.948	116.284	200.219	137.943	156.27	1.37345	0.457806	0.0195321	0.141311
SEMA4G	8.84871	7.28813	8.88798	4.80231	4.91678	2.31757	-1.96282	-0.972931	0.0195136	0.141311
TTC12	9.52938	7.28813	12.221	4.98701	4.64362	5.62838	-1.88857	-0.917296	0.0195391	0.141311
ECH1	28.2478	35.1732	46.2916	53.3795	56.8161	48.0068	1.45041	0.536458	0.0195615	0.141311
BTN2A2	5.7857	7.28813	10.3693	3.32467	4.09731	4.63514	-1.98087	-0.986135	0.0196044	0.141411
SARAF	93.5921	104.569	117.766	130.771	125.651	178.122	1.37203	0.456312	0.0196065	0.141411
CYGB	7.48737	8.87251	11.8506	6.27994	2.73154	4.63514	-1.97581	-0.982446	0.019596	0.141411
ADAMTSL1	34.0335	32.3213	49.2542	17.7316	39.0611	10.5946	-1.71161	-0.775353	0.0196566	0.141698
SLC25A35	3.40335	6.97126	6.29565	2.58586	2.18523	2.64865	-2.22981	-1.15692	0.0196936	0.14189
NEURL4	29.2688	36.4407	37.7739	56.8889	44.251	44.3649	1.42232	0.508251	0.0197369	0.142127
FLYWCH2	23.1428	16.4775	17.776	10.7128	12.0188	13.2432	-1.62403	-0.699575	0.0197627	0.142237
TOMM40	49.3486	56.4038	34.4409	83.671	62.5523	58.6014	1.46336	0.549284	0.019789	0.142351
PASK	20.0798	19.6463	18.5166	9.41991	17.2087	7.28379	-1.71459	-0.777864	0.0198338	0.142524
ATP2A2	393.427	397.362	327.374	631.503	385.694	535.358	1.38883	0.473871	0.0198243	0.142524
NXT1	6.12603	10.4569	6.29565	12.9293	13.1114	14.5676	1.72987	0.790664	0.0199185	0.143057
SYNPO2	5.10503	5.38688	2.222	1.47763	1.63893	1.98649	-2.57973	-1.36722	0.0199418	0.143149
MARK3	84.4031	84.2888	89.2501	147.579	104.072	100.98	1.37446	0.458867	0.0200184	0.143623
ITPR2	20.4201	18.0619	20.7386	29.9221	22.1255	37.7433	1.50867	0.593277	0.0200318	0.143644
PIK3R1	40.4999	39.2925	59.2532	32.8773	28.1349	34.4324	-1.45134	-0.537382	0.0200574	0.143722
S1PR2	23.4831	23.4488	31.8486	15.3304	19.1208	17.5473	-1.52561	-0.609382	0.0200637	0.143722
CWC25	25.8655	17.4281	24.8123	36.0173	30.5933	32.1149	1.47557	0.561276	0.0201136	0.143928
MOCOS	2.72268	2.535	1.111	4.98701	4.09731	6.62162	2.34962	1.23243	0.020113	0.143928
HAX1	42.2015	45.9469	41.1069	60.7676	56.5429	61.5811	1.38099	0.465707	0.020155	0.143998
FAM53B	20.7604	16.7944	14.443	39.5267	18.0282	26.1554	1.61906	0.695159	0.0201533	0.143998
TRAPPC10	55.8149	58.6219	54.8092	97.5238	69.9275	67.2095	1.39626	0.48157	0.020154	0.143998
TMCO4	6.8067	5.70376	6.66599	3.50938	3.0047	2.64865	-2.017	-1.01221	0.0202245	0.144343
E2F3	17.6974	20.5969	14.8133	32.3232	23.4913	24.8311	1.53251	0.615897	0.0202201	0.144343
TMEM151B	1.02101	1.58438	1.111	0.369408	0	0	-6.42619	-2.68396	0.0202651	0.144557
PPIP5K1	13.9537	14.5763	21.8496	24.7503	32.2322	21.5203	1.56925	0.650076	0.0202918	0.144672
ZNF793	4.76469	4.75313	3.33299	1.29293	1.91208	2.31757	-2.45903	-1.29809	0.020315	0.144761
DHCR7	52.0713	47.5313	29.2563	62.0606	37.9684	111.574	1.63754	0.711527	0.0203522	0.144899
GCAT	24.8445	17.4281	24.0716	13.4834	13.9309	16.5541	-1.5236	-0.607488	0.0203556	0.144899
DHRS7	24.5041	19.9631	26.6639	48.5772	26.496	32.1149	1.52193	0.605906	0.0203746	0.144959
TWIST2	32.3318	38.6588	28.1453	15.5151	29.7738	20.196	-1.52772	-0.611384	0.0203872	0.144973
PEA15	309.365	307.052	174.427	570.551	352.369	278.439	1.51956	0.603652	0.0204581	0.145105
NEBL	9.18905	5.07001	10.3693	2.03175	2.73154	6.95271	-2.17214	-1.11911	0.0204591	0.145105
SPTY2D1	36.7562	39.9263	34.0706	77.2063	37.9684	50.6554	1.50335	0.588182	0.0204514	0.145105
ANKRD13D	14.9747	16.4775	15.554	23.2727	25.4033	22.5135	1.5111	0.595601	0.0204695	0.145105
gene:ENSG00000258830	0	1.2675	0	4.98701	0	2.97973	5.75651	2.52519	0.0204306	0.145105
PALM3	3.40335	1.58438	1.111	0.184704	1.09262	0	-4.59483	-2.20001	0.0204253	0.145105
PUM2	85.7644	90.6264	91.4721	150.349	103.525	109.257	1.36214	0.445878	0.020638	0.146124
CDKN1A	813.741	944.922	1706.12	664.381	868.358	859.487	-1.4484	-0.53446	0.0206249	0.146124
CRAMP1	47.9872	31.0538	58.8829	76.2828	70.4738	54.6284	1.46787	0.553723	0.0206454	0.146124
FAR1	52.7519	53.5519	48.1432	65.3853	56.5429	101.642	1.44037	0.526437	0.0206838	0.14632
PTPRF	104.823	89.042	65.1785	205.391	147.23	62.2433	1.6031	0.680861	0.0207078	0.146338
DOHH	9.86972	11.4075	9.25831	21.241	15.8429	12.9122	1.67116	0.740854	0.0206973	0.146338
ZNF35	5.44536	3.16875	6.29565	11.2669	8.19463	8.27703	1.94755	0.961657	0.020719	0.146341
YRDC	17.3571	17.4281	13.332	41.3737	13.9309	26.1554	1.69889	0.764589	0.0207766	0.146649
GXYLT2	6.46637	8.23876	9.99898	4.80231	1.09262	5.62838	-2.12876	-1.09001	0.020784	0.146649
RECQL4	43.2225	46.5807	28.5156	62.2453	80.5805	37.4122	1.52363	0.60751	0.0208049	0.146704
DMAC2L	7.82771	9.18939	7.77698	3.13997	5.73624	4.63514	-1.92169	-0.942376	0.0208134	0.146704
ZNF791	22.1218	23.7657	25.5529	45.9913	20.7597	44.696	1.562	0.643395	0.0208283	0.146734
TMEM100	1.70168	1.90125	0	0	0	0.331081	-10.4005	-3.37858	0.0208964	0.147137
NDRG2	2.04201	0.950626	3.70333	0.184704	0.819463	0.662162	-4.11209	-2.03987	0.0209167	0.147205
HIVEP3	7.82771	11.4075	5.92532	19.0245	13.1114	11.2568	1.73699	0.796588	0.0209558	0.147377
SPRED1	24.1638	29.1525	32.2189	40.8196	40.4268	42.0473	1.44199	0.528059	0.0209628	0.147377
AP1S1	66.3653	58.6219	60.3642	40.6349	52.4456	41.7162	-1.38227	-0.467038	0.0209935	0.147517
RWDD3	9.52938	7.28813	8.88798	2.21645	4.64362	6.62162	-2.01629	-1.0117	0.0210216	0.147638
ZNF76	25.5251	22.4982	22.9606	16.4387	18.0282	11.2568	-1.51457	-0.598906	0.021042	0.147705
EPHA3	0.68067	0.633751	2.222	0	0.273154	0	-9.99457	-3.32114	0.0211175	0.148038
ZBTB10	12.2521	10.4569	9.62865	21.241	10.1067	25.8243	1.76029	0.815815	0.0211106	0.148038
EHD4	38.1175	37.3913	31.8486	50.6089	44.5242	60.2568	1.43256	0.518596	0.0211219	0.148038
BTN3A2	16.6764	23.1319	18.5166	23.088	33.0517	33.4392	1.50966	0.594222	0.0211709	0.148305
ZNF598	54.1133	69.3957	55.1796	99.3708	70.2007	79.1284	1.39585	0.48114	0.0212086	0.148493
GPATCH4	20.0798	18.6956	12.221	28.2597	28.9544	21.5203	1.5491	0.631432	0.0212254	0.148534
PKIA	12.5924	12.675	12.221	5.54112	8.19463	9.27027	-1.71316	-0.776663	0.021241	0.148567
ARHGAP11B	2.38235	4.75313	4.44399	1.10822	2.18523	0.993244	-2.70892	-1.43772	0.021305	0.148939
TMEM120B	40.8402	29.1525	28.8859	54.4877	39.8805	47.0135	1.43663	0.522689	0.0213947	0.149489
YPEL3	43.2225	44.3626	43.3289	33.9856	33.8711	17.8784	-1.50811	-0.592738	0.0214173	0.14957
POC1A	14.6344	14.2594	15.554	15.6998	29.7738	25.1622	1.57013	0.65088	0.0216056	0.150808
LHB	3.40335	1.90125	1.111	0.92352	0.273154	0	-4.19408	-2.06836	0.0216689	0.151173
OARD1	21.1008	17.1113	27.7749	9.0505	17.2087	15.5608	-1.59663	-0.675034	0.0216952	0.151279
MARS2	2.38235	3.48563	1.48133	4.06349	5.73624	7.94595	2.25338	1.17209	0.0217265	0.151382
NIPSNAP3A	20.0798	23.4488	19.6276	9.78932	16.9356	14.8987	-1.55906	-0.640673	0.0217322	0.151382
TM9SF1	52.0713	61.7907	44.8102	76.4675	64.1913	81.7771	1.39496	0.480219	0.021747	0.151408
KDM5D	42.5419	38.025	42.2179	67.417	54.3577	49	1.40969	0.495378	0.0217615	0.151431
FBXO21	66.3653	66.5438	82.9545	46.9148	61.1866	43.0406	-1.42478	-0.510737	0.0217932	0.151575
SGPL1	44.5839	40.8769	34.8113	55.9653	56.5429	56.2838	1.39704	0.48237	0.0218177	0.151615
KDM5C	121.84	119.779	125.913	207.607	147.776	145.345	1.36787	0.451929	0.0218212	0.151615
UBN2	35.0545	32.3213	43.3289	68.5252	35.2369	61.5811	1.49808	0.583115	0.0218425	0.151686
ENTPD7	29.2688	31.3707	28.5156	59.8441	26.496	50.3243	1.53579	0.61898	0.021868	0.15173
HYDIN	1.02101	0.950626	1.111	0	0.273154	0	-9.00469	-3.17068	0.021871	0.15173
LRRC32	1.70168	2.535	0.740665	0.369408	0	0.662162	-4.76343	-2.252	0.0218995	0.15185
ZNF641	14.6344	13.6256	13.332	9.60461	7.10201	7.94595	-1.64414	-0.717333	0.0219168	0.151893
ST6GALNAC6	47.9872	42.7782	42.5882	36.7561	28.9544	24.1689	-1.45248	-0.538519	0.0219807	0.152221
PPTC7	25.1848	21.8644	30.3673	46.3607	29.5007	38.0743	1.48644	0.571864	0.0220082	0.152221
SMAD6	24.1638	17.4281	17.776	15.8846	12.0188	5.95946	-1.71108	-0.77491	0.0220089	0.152221
LZTR1	61.6006	61.7907	48.8839	84.5945	72.3859	78.7973	1.37038	0.454573	0.0220086	0.152221
GRPEL1	20.7604	26.3007	17.0353	43.0361	26.7691	27.1487	1.52093	0.604953	0.0220262	0.152264
COX19	19.7394	16.7944	16.665	31.0303	18.8476	32.1149	1.54191	0.624717	0.0220466	0.152328
EMC3	41.8612	38.9757	44.4399	62.9841	51.8993	56.6149	1.38916	0.474218	0.0221227	0.152777
QPCTL	12.2521	11.7244	11.8506	24.7503	17.4819	14.8987	1.63035	0.705184	0.0221594	0.152953
CDK2AP1	114.353	120.73	162.576	92.5368	94.2382	105.284	-1.3623	-0.446049	0.0221726	0.152966
PPIL4	31.6512	32.955	29.9969	50.7936	35.5101	48.6689	1.43046	0.516482	0.0221849	0.152974
EAF1	20.7604	19.6463	24.0716	44.6984	23.7644	28.8041	1.52462	0.608452	0.0222463	0.15332
C7	1.36134	2.21813	0.370333	0	0	0.662162	-6.79506	-2.76449	0.0222722	0.153421
DDX56	46.9662	51.3338	47.0322	72.0346	75.3906	55.2906	1.40427	0.489821	0.0223302	0.153726
PPP1R3F	7.14704	4.11938	3.70333	11.2669	6.82886	10.5946	1.92413	0.94421	0.022339	0.153726
CLK1	37.4369	46.5807	49.6246	82.7474	44.7973	64.2298	1.44028	0.526349	0.0223674	0.153761
SPIN1	125.243	141.96	139.615	77.7604	111.993	109.588	-1.36665	-0.45064	0.022378	0.153761
PGPEP1	35.3948	27.2513	54.8092	24.1962	29.2275	23.5068	-1.52117	-0.605179	0.022374	0.153761
MARCHF4	9.86972	14.8931	4.81432	17.9163	28.9544	9.60136	1.90132	0.927001	0.0224608	0.154225
TMEM52B	0.68067	0.950626	1.48133	0.184704	0	0	-9.00623	-3.17092	0.0224681	0.154225
RFX3	3.06302	2.85188	5.18466	8.49639	7.10201	5.2973	1.98608	0.989923	0.0225643	0.15473
KLHDC1	2.04201	2.535	3.33299	0.738816	0.546309	1.32432	-3.07725	-1.62164	0.0225643	0.15473
LRBA	77.256	63.3751	82.2138	48.5772	42.8852	67.2095	-1.4109	-0.496617	0.0226084	0.154955
COL9A2	5.10503	5.38688	5.92532	2.95527	2.73154	1.32432	-2.1859	-1.12823	0.0226571	0.155132
SNAPC3	24.1638	35.1732	28.5156	41.5584	35.7832	52.973	1.47116	0.556956	0.0226563	0.155132
ENPP2	17.0168	20.9138	20.7386	19.5786	34.6906	36.75	1.53343	0.616764	0.0226843	0.155241
MTA1	74.5334	62.7413	68.1412	108.421	92.8725	76.1487	1.3608	0.444454	0.0227435	0.155568
MANBA	33.6932	38.025	41.1069	63.3535	40.4268	58.2703	1.44177	0.527843	0.0227792	0.155734
SGPP1	10.2101	17.745	11.11	28.4444	13.3846	22.1824	1.64018	0.713852	0.0228309	0.156009
NDUFS5	108.907	108.688	123.691	83.8557	93.6919	73.5	-1.35124	-0.434289	0.0228711	0.156206
VMP1	68.067	73.5151	68.1412	85.518	96.6966	102.966	1.34146	0.423803	0.0228891	0.156251
[truncated: 19,487 more rows]

## Sheet: miRNA - Isomirs
Name	CPM	CPM	CPM	CPM	CPM	Fold change	Log fold change	P-value	FDR p-value
hsa-miR-4797-3p	2.15321	2.083	0	0.0709813	4275.09	670.598	9.3893	2.20817e-07	0.000231196
hsa-miR-4670-3p	0.150224	0.10415	2.10516	8.94365	13.5272	61.0227	5.93127	1.97164e-07	0.000231196
hsa-miR-555	40.1599	1285.83	4.27824	52.6327	5.91815	-31.6288	-4.98317	5.28981e-06	0.00369229
hsa-miR-6813-3p	14.9223	8.90482	7.1983	21.1879	1016.51	29.2182	4.8688	4.08496e-05	0.0171078
hsa-miR-1286	8225.53	2745.81	4421.05	19796.3	342176	22.2636	4.47662	3.98749e-05	0.0171078
hsa-miR-6828-5p	0.0500747	0.260375	2.24098	3.93946	11.5545	36.6334	5.19509	6.79547e-05	0.0203282
hsa-miR-7154-3p	1.55232	1.61432	6.85876	11.0731	47.9088	13.7955	3.78612	6.52382e-05	0.0203282
hsa-miR-6873-5p	18.728	923.497	2.17307	18.5261	45.5838	-21.3185	-4.41403	8.43876e-05	0.0220885
hsa-miR-4725-5p	23.6353	254.074	8.69229	11.8894	14.7954	-11.7691	-3.55694	0.000116881	0.0244749
hsa-miR-6792-5p	136.454	2080.34	41.6279	104.768	98.4245	-13.5804	-3.76345	0.000115075	0.0244749
hsa-miR-2467-3p	0.150224	0.156225	2.78425	5.50105	5.70679	29.3091	4.87328	0.000143017	0.0272252
hsa-miR-4661-5p	2.95441	2.39545	10.5937	11.3215	47.4157	8.61077	3.10614	0.000200471	0.0349822
hsa-miR-4694-3p	4.70703	2.34337	8.48856	31.9416	41.4975	7.73236	2.95091	0.000242624	0.0362897
hsa-miR-10393-3p	0.100149	0.156225	0.407451	1.49061	13.2454	37.3791	5.22416	0.000235842	0.0362897
hsa-miR-6068	25.2377	116.388	3.59915	14.9416	3.09998	-9.776	-3.28924	0.000393588	0.0549449
hsa-miR-3973	0.100149	0.10415	1.08654	0.354907	12.5408	42.694	5.41596	0.000464043	0.0607317
hsa-miR-556-5p	0.150224	0.052075	2.30889	0.141963	11.1318	41.7551	5.38388	0.000530746	0.0653754
hsa-miR-4428	1.85277	0.260375	8.62438	12.8476	10.4977	10.0098	3.32335	0.000726963	0.0815549
hsa-miR-7845-5p	18.8782	482.37	1.15444	30.0961	27.1953	-12.8577	-3.68456	0.000739992	0.0815549
hsa-miR-609	13.37	196.114	6.72294	13.4155	17.5431	-8.33466	-3.05912	0.00101488	0.106258
hsa-miR-4681	0.0500747	5.10335	0	0.0354907	0.0704542	-62.209	-5.95905	0.00150407	0.116649
hsa-miR-6888-5p	0.150224	0.833199	2.92007	3.97495	11.5545	12.3576	3.62732	0.00138217	0.116649
hsa-miR-4501	0.350523	0.364525	3.12379	1.45512	13.1045	16.141	4.01266	0.00133451	0.116649
hsa-miR-7114-5p	0.100149	0.156225	2.92007	0.958248	6.48178	25.49	4.67186	0.0012251	0.116649
hsa-miR-4683	2.65396	1.30187	10.2542	6.92068	23.9544	6.8908	2.78467	0.00147392	0.116649
hsa-miR-4668-5p	0.100149	0.2083	1.69771	3.22965	5.9886	22.6552	4.50177	0.00145756	0.116649
hsa-miR-1238-5p	0.550822	2.65582	2.51262	10.1148	38.8202	10.655	3.41345	0.00137097	0.116649
hsa-miR-651-3p	1.30194	1.14565	6.17967	3.72652	15.9226	6.97478	2.80215	0.00166605	0.1203
hsa-miR-4303	1.55232	2.44752	2.85216	2.09395	61.5769	11.0487	3.46581	0.00162541	0.1203
hsa-miR-586	0.200299	0	1.29026	1.81002	5.28406	25.7817	4.68827	0.00177649	0.123999
hsa-miR-4727-5p	2.20329	2.44752	8.89602	14.1253	17.5431	5.80425	2.53711	0.00212836	0.143767
hsa-miR-514a-5p	75.2123	714.885	16.9771	76.6598	69.7496	-7.25193	-2.85837	0.00228416	0.145205
hsa-miR-3670	6.10912	16.6119	0.203726	2.05846	0.0704542	-14.1574	-3.82348	0.00228833	0.145205
hsa-miR-3169	2.20329	1.40602	2.98797	2.23591	49.8816	10.136	3.34141	0.00263478	0.157635
hsa-miR-520a-5p	4.50673	1.6664	0.271634	0.0709813	0	-26.9418	-4.75177	0.00262415	0.157635
hsa-miR-3688-5p	0.100149	0.156225	2.17307	0.141963	6.7636	22.382	4.48427	0.0033074	0.19238
hsa-miR-7847-3p	0.150224	2.23922	4.88941	2.37787	25.0817	8.97704	3.16624	0.0034284	0.194029
hsa-miR-645	0	0.052075	1.22235	3.65554	0.211363	52.659	5.71861	0.00365524	0.201423
hsa-miR-4704-3p	0.100149	0.156225	0.339543	3.54907	3.52271	18.4251	4.2036	0.00388065	0.208361
hsa-miR-606	5.1577	0.10415	0.135817	0.0709813	0.0704542	-27.1001	-4.76023	0.00425318	0.222654
hsa-miR-633	0	0.2083	0.271634	2.69729	4.08634	21.3801	4.4182	0.00556508	0.27398
hsa-miR-5089-3p	0.550822	0.052075	2.10516	2.62631	8.52495	14.2531	3.83321	0.00538894	0.27398
hsa-miR-4477b	2.05306	0.833199	5.29686	10.3278	10.0045	5.89718	2.56003	0.00562613	0.27398
hsa-miR-3200-3p	3.10463	2.86412	5.22896	3.26514	56.5747	7.2487	2.85772	0.0058692	0.279321
hsa-miR-6132	30.6457	12.4459	15.0078	39.1107	381.862	6.74256	2.7533	0.00609358	0.280458
hsa-miR-4795-3p	0.300448	1.56225	0.611177	6.31734	16.0636	8.17788	3.03173	0.00616097	0.280458
hsa-miR-3677-5p	5.50822	5.93655	10.2542	1.17119	143.797	9.03059	3.17482	0.00650066	0.289625
hsa-miR-548g-3p	2.05306	0.260375	0.746994	2.80376	31.6339	10.0735	3.33249	0.00706869	0.308372
hsa-miR-6819-3p	38.207	380.772	25.7373	42.6953	56.6452	-5.02397	-2.32883	0.00862151	0.361069
hsa-miR-520e-5p	0.250374	0.4166	3.87079	1.49061	5.63633	10.7094	3.4208	0.00855982	0.361069
hsa-miR-6507-5p	0.0500747	0.156225	0.47536	0.958248	5.00225	19.524	4.28718	0.00898659	0.363177
hsa-miR-205-3p	1.70254	2.44752	0.271634	0	0.0704542	-21.9876	-4.45862	0.00919217	0.363177
hsa-miR-670-3p	0.550822	0.468675	3.80288	3.83299	5.9886	8.68538	3.11859	0.00902233	0.363177
hsa-miR-153-5p	2.80419	0.781124	0.203726	0	0.0704542	-21.1077	-4.3997	0.00945241	0.366544
hsa-miR-552-5p	0.200299	0.4166	1.15444	3.37161	5.49543	10.6355	3.41082	0.00964138	0.367074
hsa-miR-1539	0.300448	0.156225	0.271634	3.69103	4.2977	11.734	3.55263	0.0116582	0.401129
hsa-miR-1911-5p	2.90434	0.260375	0.0679085	0.0709813	0.0704542	-20.8523	-4.38214	0.0109484	0.401129
hsa-miR-571	2.95441	2.96827	42.2391	2.37787	6.48178	5.73646	2.52016	0.0116852	0.401129
hsa-miR-6861-3p	2.05306	0.6249	4.7536	2.48435	17.4726	6.10719	2.61051	0.0108482	0.401129
hsa-miR-7109-5p	0.600897	2.2913	4.07451	3.65554	16.6976	5.6023	2.48602	0.0115669	0.401129
hsa-miR-6513-5p	4.1562	2.03092	15.4152	8.62423	16.3454	4.3241	2.1124	0.0116683	0.401129
hsa-miR-3152-3p	2.10314	18.9032	1.90144	1.70355	0.140908	-8.33599	-3.05935	0.0120613	0.407359
hsa-miR-4731-3p	0.150224	2.34337	0.47536	1.66806	33.2544	9.41522	3.23499	0.0126403	0.420139
hsa-miR-5687	0.100149	0.31245	0.0679085	3.97495	4.2977	13.1121	3.71283	0.013052	0.426858
hsa-miR-3915	0.300448	1.51017	5.29686	4.25888	8.38405	6.56256	2.71426	0.0132501	0.426858
hsa-miR-576-3p	1.90284	0.989424	2.92007	7.09813	12.5408	5.17157	2.3706	0.0137943	0.428509
hsa-miR-145-3p	115.322	34.8902	21.8665	17.1775	11.2727	-4.47604	-2.16222	0.0139153	0.428509
hsa-miR-4470	0.200299	0.10415	1.69771	1.84551	2.88862	13.1766	3.71991	0.013649	0.428509
hsa-miR-4700-3p	3.80568	0.885274	0.746994	6.1044	44.6679	7.29859	2.86762	0.0142865	0.433564
hsa-miR-615-5p	6.55979	5.72825	11.7482	18.6681	37.9043	3.7003	1.88764	0.0149455	0.447082
hsa-miR-451a	38.0067	26.3499	142.608	112.434	119.208	3.87335	1.95358	0.0161894	0.470841
hsa-miR-3189-5p	17.3759	18.0179	3.1917	3.97495	5.9886	-4.07359	-2.0263	0.016121	0.470841
hsa-miR-4275	0.0500747	0	0	0	4.2977	44.6859	5.48175	0.0165969	0.473481
hsa-miR-635	1.85277	4.47845	1.6298	27.0084	20.9249	5.21388	2.38236	0.0167324	0.473481
hsa-miR-4757-3p	1.85277	1.40602	2.44471	16.3257	6.62269	5.19459	2.37701	0.0176972	0.487192
hsa-miR-26b-3p	19.8797	82.2784	15.8906	12.8831	5.63633	-4.44873	-2.15339	0.0182654	0.487192
hsa-miR-4695-3p	17.1756	196.479	13.378	29.5637	27.618	-4.53997	-2.18268	0.0176323	0.487192
hsa-miR-4423-3p	0	0.260375	0.271634	0.0354907	7.39769	18.7861	4.23159	0.0183802	0.487192
hsa-miR-4436b-5p	4.05605	54.5225	4.21033	5.714	9.79313	-4.4549	-2.15539	0.0180631	0.487192
hsa-miR-1285-3p	0.250374	4.11392	0.339543	0.0354907	0.0704542	-14.7313	-3.88081	0.0191393	0.500971
hsa-miR-1537-3p	2.95441	5.31165	9.03183	20.2297	27.2658	4.55563	2.18765	0.0195933	0.506524
hsa-miR-552-3p	0.150224	1.30187	1.69771	7.63049	5.63633	6.84366	2.77477	0.0205697	0.50674
hsa-miR-4716-3p	0.150224	0.781124	1.35817	2.09395	8.24314	8.25719	3.04565	0.0202466	0.50674
hsa-miR-4756-3p	0.250374	0.31245	0.47536	0.106472	9.86358	12.0721	3.5936	0.0204044	0.50674
hsa-miR-4522	90.2347	608.288	18.6748	132.771	70.2428	-4.72512	-2.24035	0.0204719	0.50674
hsa-miR-6510-5p	164.295	96.3387	18.4711	44.5408	43.1884	-3.67846	-1.8791	0.0223241	0.527624
hsa-miR-4328	0.150224	0.052075	1.42608	3.37161	0	14.9057	3.89779	0.021944	0.527624
hsa-miR-4726-3p	1.75262	0.6249	3.05588	2.87474	14.4431	5.66643	2.50244	0.0226773	0.527624
hsa-miR-600	0.0500747	1.35395	0.0679085	0.0354907	0	-17.1919	-4.10366	0.0225389	0.527624
hsa-miR-1909-3p	4.3565	16.8202	1.15444	1.45512	4.86134	-4.26542	-2.09269	0.0226557	0.527624
hsa-miR-3927-5p	0.0500747	0.937349	0	2.69729	12.5408	10.1606	3.34491	0.0232676	0.53541
hsa-miR-7162-3p	1.20179	1.0415	4.41405	1.38414	13.034	5.54821	2.47202	0.0235265	0.535483
hsa-miR-4442	2.10314	1.56225	4.07451	4.72026	14.7954	4.26399	2.0922	0.024188	0.54462
hsa-miR-5579-5p	0.450673	0.260375	1.49399	1.9165	5.00225	7.68167	2.94142	0.0254979	0.568007
hsa-miR-3133	0.350523	0.468675	3.25961	1.49061	5.21361	7.90839	2.98338	0.0261925	0.573972
hsa-miR-6753-3p	4.80718	4.68675	5.77222	23.4948	27.4771	3.98216	1.99355	0.0263139	0.573972
hsa-miR-6165	885.322	491.796	423.477	1003.32	8858.34	4.97901	2.31586	0.0267321	0.577082
hsa-miR-7153-3p	7.06054	3.80147	1.49399	4.40084	91.3086	5.95785	2.57479	0.0283991	0.588789
hsa-miR-648	0.100149	0.10415	0.135817	1.66806	2.32499	12.7043	3.66725	0.0275565	0.588789
hsa-miR-4719	0.100149	0.2083	2.98797	0.0354907	3.3818	13.2461	3.7275	0.0278479	0.588789
hsa-miR-4660	2.50374	4.32222	2.30889	7.9854	39.8771	4.88968	2.28974	0.0282283	0.588789
hsa-miR-4520-2-3p	2.00299	0.572825	2.51262	3.97495	13.034	5.01606	2.32655	0.0296843	0.609402
hsa-miR-2117	0.100149	0.676975	2.64843	3.90397	1.97272	7.32249	2.87233	0.030588	0.615878
hsa-miR-7151-3p	0.150224	0.156225	1.96935	3.22965	0.0704542	11.083	3.47028	0.0303635	0.615878
hsa-miR-1324	0.350523	0.364525	0.679085	0.461379	7.96132	8.30973	3.0548	0.0317509	0.621368
hsa-miR-3164	0.250374	3.17657	0.271634	0.106472	0	-13.0592	-3.70699	0.0316031	0.621368
hsa-miR-6821-5p	2.50374	2.03092	6.17967	4.89771	12.8931	3.49664	1.80597	0.0315828	0.621368
hsa-miR-6512-5p	2.20329	0.10415	0.0679085	0.106472	0.140908	-10.4257	-3.38207	0.0333592	0.646798
hsa-miR-4753-5p	0.450673	3.38487	4.0066	4.01045	19.4454	4.75658	2.24992	0.0367218	0.667996
hsa-miR-3168	0.200299	0.156225	2.03726	3.76201	0	10.5147	3.39434	0.0368331	0.667996
hsa-miR-5003-5p	0.0500747	2.55167	0.203726	0.0354907	0.0704542	-12.4182	-3.63439	0.0351646	0.667996
hsa-miR-6852-5p	2.30344	1.6664	3.25961	12.3508	6.48178	3.71968	1.89518	0.0360077	0.667996
hsa-miR-378j	0.901345	1.4581	4.8215	7.20461	4.36816	4.68966	2.22948	0.0358254	0.667996
hsa-miR-11181-3p	0.400598	1.19772	1.15444	2.12944	10.6386	5.7561	2.52509	0.0370046	0.667996
hsa-miR-6722-5p	0.200299	0.052075	1.08654	3.08769	0.140908	10.9397	3.4515	0.0368226	0.667996
hsa-miR-6795-5p	0.300448	0.260375	2.85216	4.15241	0.0704542	8.26358	3.04677	0.0358184	0.667996
hsa-miR-219b-5p	4.50673	2.03092	2.51262	13.8059	22.8272	3.98433	1.99434	0.0374045	0.669445
hsa-miR-499a-3p	0.350523	2.44752	1.69771	4.96869	14.584	5.04224	2.33407	0.0404261	0.699606
hsa-miR-135a-5p	8.96338	8.22784	8.21693	3.51358	100.679	4.3551	2.12271	0.0404166	0.699606
hsa-miR-4495	2.25336	0.2083	0.271634	0.0354907	0.0704542	-9.89837	-3.30719	0.0402778	0.699606
hsa-miR-6892-3p	13.8206	4.47845	0.950719	3.97495	0.84545	-4.67576	-2.2252	0.039666	0.699606
hsa-miR-3619-3p	1.40209	0.31245	0.135817	0.0354907	0.140908	-8.65371	-3.11332	0.0412702	0.708359
hsa-miR-8083	0.200299	0.937349	1.69771	1.27766	8.52495	6.656	2.73466	0.0426434	0.709485
hsa-miR-1279	0.200299	0.260375	0.135817	1.84551	4.1568	8.64417	3.11173	0.042071	0.709485
hsa-miR-1207-5p	3.20478	31.7137	6.92667	4.72026	0.281817	-4.38218	-2.13165	0.0426911	0.709485
hsa-miR-223-3p	0.0500747	0.10415	0.203726	2.23591	0.493179	12.0137	3.5866	0.0425937	0.709485
hsa-miR-3976	0.250374	0.156225	2.17307	2.94573	0.211363	8.5398	3.0942	0.0443117	0.72253
hsa-miR-4487	41.4118	69.0514	20.1009	23.6723	8.31359	-3.17422	-1.6664	0.0438926	0.72253
hsa-miR-569	0	0	0.135817	1.56159	0	83.6947	6.38706	0.0445111	0.72253
hsa-miR-1273h-3p	0.0500747	0.885274	3.1917	3.37161	2.88862	6.69611	2.74332	0.0451357	0.727032
hsa-miR-4790-3p	1.70254	2.2913	2.92007	7.595	10.3568	3.47857	1.79849	0.045891	0.733556
hsa-miR-4678	0.250374	2.44752	0.0679085	0.177453	0.140908	-9.6956	-3.27733	0.0470067	0.745697
hsa-miR-3674	9.81465	9.06104	22.8852	20.8685	33.7475	2.72677	1.44719	0.0476428	0.750105
hsa-miR-6881-5p	31.8976	11.6127	4.7536	208.401	50.5861	4.04068	2.0146	0.0483638	0.755774
hsa-miR-4509	1.95292	1.14565	3.32752	6.63676	9.29995	4.12575	2.04466	0.0490103	0.760204
hsa-miR-5589-3p	0.450673	0.468675	1.69771	2.55533	3.66362	5.64856	2.49788	0.0499806	0.763937
hsa-miR-3652	3.30493	4.68675	4.27824	11.428	27.5476	3.6017	1.84868	0.0499492	0.763937
hsa-miR-372-5p	0.751121	0.156225	3.1917	2.16493	3.02953	5.93399	2.569	0.0515246	0.78183
hsa-miR-6513-3p	2.05306	4.21807	1.49399	15.4384	16.4158	3.5425	1.82477	0.0525726	0.787489
hsa-miR-4758-3p	0.450673	2.34337	7.53785	2.41337	8.80677	4.44994	2.15379	0.0526497	0.787489
hsa-miR-8060	0.851271	0.156225	0.0679085	5.25262	5.70679	7.20976	2.84995	0.0535699	0.795571
hsa-miR-4479	1.05157	2.96827	2.3768	6.4593	13.034	3.6174	1.85495	0.0539544	0.795637
hsa-miR-3123	0.0500747	1.09357	2.17307	4.75575	3.52271	6.06381	2.60023	0.0553684	0.803174
hsa-miR-2114-5p	8.41256	20.8821	2.24098	7.87893	1.97272	-3.59932	-1.84773	0.0556161	0.803174
hsa-miR-5011-3p	68.302	32.651	21.0516	128.654	377.423	3.48051	1.7993	0.0554322	0.803174
hsa-miR-4485-3p	4.80718	4.42637	5.43268	10.9666	31.493	3.4509	1.78697	0.0618356	0.818856
hsa-miR-4426	1.50224	2.7079	0.679085	10.3988	11.0613	3.50113	1.80782	0.0622906	0.818856
hsa-miR-6816-3p	0.400598	2.9162	4.27824	0.141963	19.7272	4.83396	2.2732	0.0608467	0.818856
hsa-miR-1183	4.1562	3.9577	6.11177	7.55951	24.4476	3.12268	1.64278	0.0627927	0.818856
hsa-miR-3159	0.150224	0.833199	0.203726	8.09187	1.19772	6.39637	2.67725	0.0607869	0.818856
hsa-miR-1910-3p	3.35501	0.10415	0.407451	0.106472	0.0704542	-8.78883	-3.13567	0.0634798	0.818856
hsa-miR-5088-5p	0.751121	2.2913	2.03726	6.67225	9.51131	3.98397	1.99421	0.0614726	0.818856
hsa-miR-1182	2.00299	2.7079	1.01863	2.62631	27.1953	4.35041	2.12115	0.0637867	0.818856
hsa-miR-10399-5p	1.35202	1.56225	0.135817	0.177453	0.281817	-7.35248	-2.87823	0.064523	0.818856
hsa-miR-3925-3p	47.3707	72.6446	20.5084	24.9854	14.6545	-2.98288	-1.57671	0.0607963	0.818856
hsa-miR-4635	2.10314	44.4199	3.93869	11.8539	1.6909	-3.97947	-1.99258	0.0606582	0.818856
hsa-miR-10522-5p	0.350523	1.51017	2.78425	6.8497	3.87498	4.85096	2.27827	0.0578689	0.818856
hsa-miR-219a-2-3p	2.15321	2.03092	2.92007	10.0793	7.5386	3.2809	1.71409	0.0622455	0.818856
hsa-miR-3975	0.200299	1.2498	3.39543	1.63257	7.5386	5.71991	2.51599	0.0636206	0.818856
hsa-miR-1289	0.400598	0.676975	3.46333	1.10021	4.50907	5.50079	2.45964	0.0632371	0.818856
hsa-miR-5191	0.550822	0.729049	2.78425	4.43633	2.18408	4.97066	2.31344	0.0641849	0.818856
hsa-miR-4703-3p	31.2466	11.7169	11.6124	20.1942	218.478	3.88216	1.95686	0.0574711	0.818856
hsa-miR-3127-5p	0.150224	0.31245	1.15444	0.53236	3.66362	7.44401	2.89608	0.0601374	0.818856
hsa-miR-204-5p	3.00448	18.6949	19.2181	54.5492	31.2817	3.22801	1.69064	0.060276	0.818856
hsa-miR-5691	13.9709	44.1075	12.631	9.65346	8.38405	-2.84	-1.50589	0.0579715	0.818856
hsa-miR-3923	1.70254	0.31245	2.10516	0.212944	14.584	5.54876	2.47216	0.06655	0.81974
hsa-miR-4520-5p	0.300448	0.781124	3.32752	3.72652	1.33863	5.18399	2.37406	0.0665249	0.81974
hsa-miR-605-3p	1.65247	11.5086	0.611177	3.0522	0.140908	-5.10313	-2.35138	0.0660771	0.81974
hsa-miR-5004-5p	1.35202	17.9659	0	1.63257	3.73407	-5.3866	-2.42937	0.0659476	0.81974
hsa-miR-3618	1.35202	0.052075	0.0679085	0.106472	0.0704542	-7.84418	-2.97162	0.0652297	0.81974
hsa-miR-1292-3p	8.66293	52.3874	3.46333	7.06264	18.8113	-3.12225	-1.64259	0.0671954	0.822849
hsa-miR-374c-5p	5.358	11.6127	7.74157	11.499	55.6588	2.93924	1.55544	0.068623	0.831292
hsa-miR-452-3p	0.200299	0.2083	0.271634	1.31315	2.81817	6.95841	2.79876	0.0686788	0.831292
hsa-miR-4431	666.295	1868.81	609.411	276.082	428.291	-2.89457	-1.53335	0.0700923	0.832872
hsa-miR-3180	16.0239	122.637	10.5258	17.284	35.8612	-3.26673	-1.70785	0.0704004	0.832872
hsa-miR-6869-5p	0.200299	3.02035	5.90804	1.59708	13.809	4.39303	2.13522	0.0700408	0.832872
hsa-miR-1262	1.75262	0.989424	0.679085	11.6409	4.93179	4.19023	2.06703	0.0703316	0.832872
hsa-miR-582-3p	1.65247	1.82262	3.1917	1.88101	16.4158	4.09944	2.03543	0.0725714	0.840495
hsa-miR-96-3p	0.100149	1.2498	1.96935	2.2714	6.83405	5.42104	2.43857	0.0725754	0.840495
hsa-miR-128-1-5p	11.5172	3.69732	10.5258	9.47601	47.6975	2.962	1.56657	0.0726171	0.840495
hsa-miR-6833-5p	1.90284	0.4166	2.03726	5.07517	8.24314	4.38499	2.13257	0.0726503	0.840495
hsa-miR-595	6.86024	5.4158	0.543268	19.0585	46.9225	3.60923	1.85169	0.0738117	0.844599
hsa-miR-6514-5p	2.45366	3.43695	0.339543	30.1316	4.79088	3.98876	1.99594	0.0734156	0.844599
hsa-miR-5571-5p	62.5934	96.547	17.045	25.6952	45.4429	-2.70804	-1.43725	0.0746421	0.84946
hsa-miR-603	0.0500747	0.31245	2.78425	1.45512	0.0704542	7.69751	2.94439	0.075491	0.854477
hsa-miR-6128	1.25187	0.989424	1.6298	4.04594	8.4545	4.17351	2.06126	0.0764698	0.860901
hsa-miR-1247-5p	7.26084	3.17657	3.53124	13.0961	33.8885	3.22173	1.68783	0.0776178	0.86453
hsa-miR-19a-5p	1.45217	3.9577	0.47536	0.709813	0.0704542	-6.08551	-2.60538	0.0772282	0.86453
hsa-miR-498-3p	0.95142	0.468675	0.882811	5.18164	3.94543	4.68292	2.22741	0.0788321	0.87199
hsa-miR-4777-3p	5.10762	1.8747	0.271634	1.49061	0.0704542	-5.47684	-2.45334	0.0791204	0.87199
hsa-miR-6882-5p	6.71002	1.19772	8.08111	10.4697	16.9795	2.98867	1.5795	0.0819501	0.875528
hsa-miR-3925-5p	59.5389	107.014	46.2457	14.9416	32.3385	-2.67403	-1.41902	0.0817586	0.875528
hsa-miR-4800-3p	0.851271	2.2913	1.90144	6.35283	11.3431	4.14481	2.05131	0.0807308	0.875528
hsa-miR-511-3p	2.90434	6.56145	0.882811	1.70355	0.140908	-5.05139	-2.33668	0.0815452	0.875528
hsa-miR-1224-3p	1.30194	2.55167	10.39	10.8956	0.704542	3.80012	1.92605	0.0814512	0.875528
hsa-miR-363-5p	4.60688	0.937349	6.58713	4.9332	16.134	3.31149	1.72748	0.080518	0.875528
hsa-miR-12113	1.55232	0.31245	0.407451	7.87893	4.72043	4.63062	2.2112	0.0829959	0.8822
hsa-miR-562	0.200299	1.77055	2.71634	8.19834	2.18408	4.43215	2.14801	0.0838486	0.884779
hsa-miR-3160-5p	3.20478	15.6225	4.95732	2.02297	2.25453	-3.06392	-1.61538	0.0840836	0.884779
hsa-miR-6830-3p	2.60389	4.84297	8.08111	6.99166	18.2476	2.97236	1.57161	0.0854326	0.894479
hsa-miR-3117-5p	0.100149	0.2083	1.83353	1.95199	0	7.91947	2.9854	0.0867883	0.904153
hsa-miR-1237-3p	49.1233	53.8455	16.0943	22.1462	21.2772	-2.57993	-1.36733	0.0884721	0.910472
hsa-miR-210-5p	37.5561	28.1205	21.9344	10.8601	5.42497	-2.57809	-1.36631	0.0886767	0.910472
hsa-miR-544a	0.100149	1.97885	2.44471	1.73904	10.5681	4.70096	2.23296	0.0886993	0.910472
hsa-miR-6771-3p	4.00598	1.97885	4.68569	6.21087	16.4158	3.02987	1.59926	0.0917745	0.928386
hsa-miR-4457	0.250374	0.52075	0.407451	3.93946	1.6909	5.21131	2.38165	0.0915428	0.928386
hsa-miR-548au-3p	1.30194	1.09357	0.339543	0.177453	0.0704542	-6.06841	-2.60132	0.0915315	0.928386
hsa-miR-3974	2.05306	1.61432	1.69771	2.98122	15.9226	3.72642	1.89779	0.0922779	0.92899
hsa-miR-15a-3p	15.5732	7.91539	5.97595	13.7704	91.7313	3.16164	1.66067	0.0931299	0.933081
hsa-miR-1301-3p	8.06203	8.69652	21.7307	23.7787	15.7113	2.44714	1.2911	0.0944567	0.941868
hsa-miR-642a-3p	1.40209	4.00977	4.07451	7.94991	9.51131	2.65328	1.40778	0.0960795	0.953509
hsa-miR-1972	0.550822	1.97885	1.35817	1.81002	12.5408	4.11558	2.0411	0.0973182	0.956733
hsa-miR-3682-3p	2.05306	0.468675	0.271634	0.141963	0.211363	-6.13707	-2.61755	0.0971139	0.956733
hsa-miR-140-3p	2.00299	8.27992	7.53785	16.5032	18.9522	2.78717	1.4788	0.0983062	0.957427
hsa-miR-1265	19.0284	38.3272	10.1863	14.3027	10.7795	-2.4304	-1.28119	0.098546	0.957427
hsa-miR-5697	5.7586	4.166	3.59915	42.6243	3.80453	3.36169	1.74919	0.0995712	0.957427
hsa-miR-4445-5p	1.95292	1.30187	2.58052	4.29437	9.3704	3.30562	1.72492	0.0996063	0.957427
hsa-miR-626	2.65396	3.02035	2.17307	7.595	16.134	3.03612	1.60223	0.0996748	0.957427
hsa-miR-4797-5p	1.95292	2.7079	0.135817	0.993739	0.0704542	-5.38473	-2.42887	0.102818	0.969825
hsa-miR-3134	2.50374	2.4996	1.22235	7.9854	15.2886	3.25675	1.70343	0.102337	0.969825
hsa-miR-4706	2.55381	4.166	0.271634	1.66806	0	-5.02816	-2.33003	0.10267	0.969825
hsa-miR-4651	4.90733	12.6021	4.34614	2.37787	0.915904	-3.43199	-1.77904	0.102679	0.969825
hsa-miR-548c-3p	1.65247	2.083	1.69771	7.06264	10.4977	3.42947	1.77799	0.106181	0.985649
hsa-miR-548av-3p	3.80568	0.572825	0.611177	9.9019	10.4977	3.19287	1.67485	0.105226	0.985649
hsa-miR-6871-3p	1.30194	2.18715	0.407451	0.212944	0.422725	-5.35143	-2.41992	0.108232	0.985649
hsa-miR-892c-5p	0.200299	0.156225	2.17307	1.66806	0	6.96582	2.80029	0.106557	0.985649
hsa-miR-9851-5p	5.1577	1.09357	4.68569	9.19208	14.584	3.02791	1.59832	0.108992	0.985649
hsa-miR-1291	9.5142	14.8934	50.0486	15.4384	32.1271	2.66241	1.41273	0.108898	0.985649
hsa-miR-6822-3p	4.9574	22.8609	0.135817	6.99166	5.0727	-3.41014	-1.76983	0.109203	0.985649
hsa-miR-6781-5p	12.5688	16.7161	10.1863	2.2714	0.774996	-3.32227	-1.73217	0.106009	0.985649
hsa-miR-4804-5p	7.36099	14.4768	12.4952	16.1837	67.7065	2.93988	1.55576	0.109103	0.985649
hsa-miR-4646-3p	3.40508	0.676975	9.5751	1.45512	11.3431	3.63474	1.86185	0.106881	0.985649
hsa-miR-12127	0.600897	0.52075	1.76562	1.81002	3.59316	4.1477	2.05231	0.110871	0.993158
hsa-miR-4672	0.100149	3.48902	0.135817	0.0709813	0.634088	-6.43735	-2.68647	0.110983	0.993158
hsa-miR-887-3p	8.66293	9.94632	16.9092	22.5721	23.5317	2.26321	1.17837	0.111863	0.996767
hsa-miR-548ac	2.35351	4.32222	4.41405	1.84551	0	-1.59817	-0.676425	0.651066	0.999117
hsa-miR-548ae-3p	4.3565	3.28072	4.0066	1.63257	4.2977	-1.17192	-0.22888	0.840441	0.999117
hsa-miR-12136	21.8827	60.7194	41.1526	22.998	58.1951	-1.01338	-0.0191777	0.98228	0.999117
hsa-miR-548aa	3.10463	2.18715	0.203726	4.72026	2.67726	-1.03824	-0.0541362	0.967642	0.999117
hsa-miR-548as-3p	4.45665	0.989424	3.32752	2.69729	2.39544	1.02879	0.0409544	0.974008	0.999117
hsa-miR-548at-3p	1.80269	0.781124	1.5619	1.34865	0.281817	-1.20063	-0.263788	0.860521	0.999117
hsa-miR-548ad-3p	0.801196	0.364525	1.83353	1.34865	0.563633	2.13555	1.09461	0.456675	0.999117
hsa-miR-424-3p	287.229	248.814	272.517	132.771	98.0722	-1.59754	-0.675849	0.421591	0.999117
hsa-miR-548a-3p	9.1136	1.97885	2.85216	3.51358	13.034	1.16314	0.218023	0.818198	0.999117
hsa-miR-5582-3p	1.25187	6.0407	3.53124	1.9165	0.140908	-1.95237	-0.965229	0.481099	0.999117
hsa-miR-548e-5p	2.50374	3.22865	0.814902	2.55533	3.59316	-1.23203	-0.301039	0.80443	0.999117
hsa-miR-548n	17.4761	12.1335	24.5829	13.9123	26.1385	1.45	0.536053	0.486136	0.999117
hsa-miR-548az-5p	0.350523	3.59317	4.34614	3.08769	1.83181	1.56591	0.647	0.610439	0.999117
hsa-miR-4668-3p	10.7661	4.11392	6.45131	9.61797	3.80453	-1.11817	-0.161135	0.854574	0.999117
hsa-miR-3662	4.05605	4.06185	8.89602	5.46556	0.0704542	1.18532	0.245272	0.836503	0.999117
hsa-miR-4282	82.8737	106.129	61.4572	30.522	104.131	-1.44653	-0.5326	0.506022	0.999117
hsa-miR-497-3p	8.66293	5.57202	0.339543	3.51358	6.83405	-1.9972	-0.997976	0.383618	0.999117
hsa-miR-553	16.775	38.8479	4.68569	25.9082	31.1407	-1.35094	-0.433968	0.660339	0.999117
hsa-miR-7844-5p	2.95441	3.28072	2.71634	3.22965	0	-1.56595	-0.647039	0.653768	0.999117
hsa-miR-186-5p	19.1286	9.21727	20.1688	16.7161	2.6068	-1.07597	-0.105643	0.9109	0.999117
hsa-miR-548u	8.46263	9.63387	4.61778	10.6472	14.0908	1.08198	0.113677	0.89819	0.999117
hsa-miR-4311	3.90583	3.43695	2.30889	9.75993	5.28406	1.58502	0.664503	0.474914	0.999117
hsa-miR-1276	3.85576	2.75997	2.51262	3.0522	0	-1.77419	-0.827158	0.577394	0.999117
hsa-miR-583	0.300448	7.60294	3.66706	8.48227	0.281817	1.05089	0.0716164	0.954404	0.999117
hsa-miR-6835-3p	3.80568	0.156225	5.02523	6.31734	3.24089	2.4497	1.2926	0.295043	0.999117
hsa-miR-4422	28.4925	61.7609	8.96392	25.8727	40.0884	-1.80666	-0.853321	0.336479	0.999117
hsa-miR-518a-3p	0.851271	1.8747	2.78425	0.53236	0.0704542	-1.21216	-0.277577	0.862188	0.999117
hsa-miR-320a-3p	941.656	1295	1964.32	721.206	299.148	-1.12408	-0.168741	0.849963	0.999117
hsa-miR-548an	0.350523	2.60375	1.90144	0.106472	0.422725	-1.83769	-0.877895	0.572285	0.999117
hsa-miR-6768-3p	1.55232	4.00977	2.78425	9.36954	0.211363	1.48661	0.572026	0.637222	0.999117
hsa-miR-4484	0.150224	1.56225	0.950719	1.41963	0.140908	-1.00899	-0.0129079	0.99345	0.999117
hsa-miR-10526-3p	1.95292	3.1245	0.339543	4.82673	4.08634	1.21877	0.285424	0.813372	0.999117
hsa-miR-548m	2.45366	1.4581	1.22235	5.00418	0.352271	1.13292	0.180044	0.891474	0.999117
hsa-miR-12135	161.591	212.778	169.092	117.013	218.197	-1.11402	-0.155781	0.851114	0.999117
hsa-miR-548a-5p	29.6943	32.651	29.9477	19.4844	12.7522	-1.50406	-0.588859	0.500608	0.999117
hsa-miR-548av-5p	20.6308	30.3597	46.9927	18.1002	11.7658	1.0044	0.00632958	0.994513	0.999117
hsa-miR-548l	3.70553	6.14485	4.88941	2.59082	4.2977	-1.27122	-0.346216	0.730876	0.999117
hsa-miR-6507-3p	0.701046	4.7909	4.07451	1.77453	8.52495	1.73834	0.797714	0.501656	0.999117
hsa-miR-3609	2.05306	3.28072	4.27824	2.69729	0	-1.14564	-0.196148	0.894184	0.999117
hsa-miR-106a-5p	678.863	733.788	1029.29	476.285	180.292	-1.25691	-0.329885	0.710444	0.999117
hsa-miR-4796-3p	4.60688	9.06104	6.45131	2.55533	7.04542	-1.28592	-0.362797	0.666405	0.999117
hsa-miR-548at-5p	2.30344	3.7494	2.64843	3.26514	4.43861	1.13569	0.183567	0.871057	0.999117
hsa-miR-561-3p	3.90583	1.71847	1.6298	4.43633	4.36816	1.24101	0.311513	0.789147	0.999117
hsa-miR-5692a	1.70254	0.2083	0.271634	4.50731	6.05906	3.75997	1.91072	0.164082	0.999117
hsa-miR-3121-3p	2.60389	2.9162	0.203726	4.40084	5.21361	1.18696	0.247269	0.841796	0.999117
hsa-miR-551b-5p	3.60538	2.65582	5.84013	0.354907	4.08634	1.08871	0.122624	0.923676	0.999117
hsa-miR-605-5p	19.8797	22.1839	29.0648	18.5616	9.44086	-1.10551	-0.144715	0.856197	0.999117
hsa-miR-3646	3.15471	0.364525	3.05588	1.98748	6.41133	2.15613	1.10844	0.387727	0.999117
hsa-miR-1252-3p	2.50374	0.364525	1.90144	3.30063	0.0704542	1.23032	0.299031	0.834999	0.999117
hsa-miR-224-3p	0.400598	2.81205	1.08654	2.98122	0.0704542	-1.15294	-0.205316	0.886741	0.999117
hsa-miR-10a-3p	46.92	61.136	64.8526	35.4197	22.5453	-1.31994	-0.400475	0.633203	0.999117
hsa-miR-3606-3p	22.4335	36.0879	29.1328	33.1128	45.0202	1.22129	0.288406	0.730879	0.999117
hsa-miR-495-3p	61.4417	31.7657	34.2938	27.8957	98.4245	1.14818	0.199344	0.809475	0.999117
hsa-miR-7-1-3p	59.2885	98.2655	86.6513	22.5721	29.0976	-1.70928	-0.77339	0.346282	0.999117
hsa-miR-196a-1-3p	0.100149	1.40602	0.0679085	1.38414	0.0704542	-1.44044	-0.526506	0.753448	0.999117
hsa-miR-122b-3p	62.1428	54.3142	79.1134	51.0356	13.1045	-1.21927	-0.286021	0.734497	0.999117
hsa-miR-141-3p	2.35351	3.07242	0.203726	4.29437	1.83181	-1.27345	-0.348739	0.786249	0.999117
hsa-miR-132-3p	219.578	202.936	395.635	118.397	173.951	1.08538	0.118198	0.886096	0.999117
hsa-miR-4803	0	2.03092	0	2.30689	3.52271	1.90821	0.932218	0.562654	0.999117
hsa-miR-543	45.0172	56.8138	86.2438	32.9353	35.2975	1.01077	0.0154559	0.984912	0.999117
hsa-miR-6776-3p	2.85426	1.35395	2.98797	4.50731	0.140908	1.21441	0.280255	0.837158	0.999117
hsa-miR-652-5p	4.5568	4.5826	1.76562	2.2714	0.0704542	-3.29548	-1.72049	0.184294	0.999117
hsa-miR-6732-3p	1.65247	3.5411	0.679085	4.75575	0.0704542	-1.40117	-0.486634	0.740326	0.999117
hsa-miR-3150a-5p	10.8161	24.1628	2.78425	27.3278	105.893	2.59119	1.37362	0.183228	0.999117
hsa-miR-490-3p	6.86024	16.7681	15.4152	12.1733	15.5704	1.21628	0.282481	0.74659	0.999117
hsa-miR-649	7.81166	5.78032	3.46333	6.49479	2.74771	-1.57931	-0.659298	0.478215	0.999117
hsa-miR-3912-3p	2.00299	1.40602	2.24098	5.35909	0.563633	1.60947	0.686582	0.602299	0.999117
hsa-miR-614	10.1652	6.14485	1.83353	9.79542	21.2067	1.34122	0.42355	0.657949	0.999117
hsa-miR-523-3p	3.45516	4.06185	3.32752	8.90816	0.0704542	1.09444	0.130188	0.914792	0.999117
hsa-miR-191-5p	1579.86	1702.9	2412.18	985.398	742.728	-1.18933	-0.250153	0.766898	0.999117
hsa-miR-337-5p	375.01	239.701	381.85	227.282	128.72	-1.24968	-0.32156	0.689877	0.999117
hsa-miR-3129-3p	0.550822	4.00977	3.32752	0.283925	1.54999	-1.33307	-0.414747	0.763949	0.999117
hsa-miR-708-3p	0.200299	2.75997	1.42608	0.106472	0.211363	-2.56107	-1.35675	0.41297	0.999117
hsa-miR-6750-3p	8.81316	32.0782	1.22235	9.19208	13.3863	-2.57508	-1.36462	0.166218	0.999117
hsa-miR-618	10.2653	10.1025	11.2728	8.26933	0.211363	-1.54522	-0.627811	0.580354	0.999117
hsa-miR-548b-3p	1.60239	0.468675	1.42608	2.05846	0.211363	1.20227	0.265766	0.854015	0.999117
hsa-miR-4511	1.05157	1.8747	1.76562	1.34865	0	-1.40091	-0.486363	0.746852	0.999117
hsa-miR-3617-5p	9.3139	5.2075	5.90804	7.84344	7.11587	-1.03988	-0.0564109	0.946449	0.999117
hsa-miR-3667-5p	23.7855	234.129	21.7307	39.0752	84.4745	-2.66295	-1.41302	0.136528	0.999117
hsa-miR-548ao-3p	1.90284	1.61432	1.22235	1.88101	7.74996	2.0431	1.03076	0.409636	0.999117
hsa-miR-4432	4.50673	1.82262	4.54987	0.461379	0.281817	-1.80011	-0.848087	0.538615	0.999117
hsa-miR-8087	1.80269	1.19772	0.47536	1.1357	3.3818	1.09975	0.137182	0.919766	0.999117
hsa-miR-4662a-3p	4.90733	1.82262	3.66706	4.79124	11.4136	1.96059	0.97129	0.300066	0.999117
hsa-miR-3156-5p	17.4761	7.96747	7.33412	3.15867	4.36816	-2.58172	-1.36833	0.156195	0.999117
hsa-miR-10527-5p	4.60688	2.23922	2.03726	2.48435	0.140908	-2.17991	-1.12427	0.388936	0.999117
hsa-miR-7109-3p	9.16368	7.08219	7.9453	12.1733	9.29995	1.21905	0.285755	0.725476	0.999117
hsa-miR-518e-3p	1.30194	0.260375	1.49399	0.141963	3.73407	2.2618	1.17747	0.442803	0.999117
hsa-miR-99a-3p	272.907	206.321	196.731	308.059	585.967	1.51728	0.601492	0.427766	0.999117
hsa-miR-6796-3p	0.250374	2.13507	0.950719	1.31315	0	-1.56068	-0.642179	0.685783	0.999117
hsa-miR-320e	57.586	85.455	121.013	32.6514	19.6567	-1.23816	-0.308198	0.725973	0.999117
hsa-miR-100-3p	36.9051	38.3792	13.7175	29.5637	19.234	-1.79935	-0.847475	0.294216	0.999117
hsa-miR-12120	6.10912	3.38487	4.8215	3.72652	2.88862	-1.24662	-0.318024	0.759705	0.999117
hsa-miR-8080	1.65247	2.34337	0.135817	4.15241	0.211363	-1.31537	-0.395465	0.780611	0.999117
hsa-miR-12118	0.350523	1.14565	1.15444	7.94991	0.634088	4.34042	2.11784	0.127037	0.999117
hsa-miR-541-5p	24.4365	21.1945	12.4273	31.4447	41.0748	1.24121	0.31175	0.709672	0.999117
hsa-miR-124-3p	0.300448	3.02035	1.01863	3.47809	1.83181	1.27847	0.354421	0.791955	0.999117
hsa-miR-3714	4.10613	7.55087	1.35817	5.78498	6.62269	-1.26704	-0.34146	0.716996	0.999117
hsa-miR-3910	0.100149	2.75997	1.01863	1.59708	5.35452	1.85066	0.888039	0.52161	0.999117
hsa-miR-524-3p	3.60538	0.260375	2.10516	4.61379	9.79313	2.83703	1.50438	0.181386	0.999117
hsa-miR-4475	13.42	32.7031	6.99458	14.9416	37.6225	-1.16213	-0.216771	0.814391	0.999117
hsa-miR-3936	3.20478	2.44752	0.543268	2.48435	1.19772	-1.94535	-0.960033	0.469215	0.999117
hsa-miR-548ag	0.250374	1.35395	1.90144	0.141963	4.43861	2.66636	1.41487	0.3679	0.999117
hsa-miR-18a-5p	16.775	24.996	24.2433	17.9228	4.1568	-1.3517	-0.434779	0.588439	0.999117
hsa-miR-3184-3p	0.95142	1.56225	0.814902	1.56159	2.4659	1.27923	0.355277	0.802841	0.999117
hsa-miR-1264	18.4776	10.5712	4.48196	23.9207	15.2181	1.00277	0.00398658	0.996309	0.999117
hsa-miR-519a-3p	4.00598	0.052075	1.01863	3.0522	1.19772	-1.15045	-0.202197	0.884039	0.999117
hsa-miR-302a-3p	9.01345	14.7893	13.5817	5.89145	5.70679	-1.42151	-0.507419	0.545233	0.999117
hsa-miR-12117	1.65247	3.28072	1.90144	2.51984	3.31135	1.04399	0.0621096	0.960249	0.999117
hsa-miR-148a-5p	2.75411	0.2083	7.60575	6.35283	2.25453	3.6353	1.86207	0.1263	0.999117
hsa-miR-495-5p	79.068	68.9993	73.5449	65.9772	30.9998	-1.30186	-0.38057	0.646437	0.999117
hsa-miR-382-5p	649.469	580.948	606.83	362.36	281.253	-1.47604	-0.561729	0.504292	0.999117
hsa-miR-6082	0.600897	1.6664	1.83353	8.51776	0.140908	3.08659	1.62601	0.218158	0.999117
hsa-miR-8084	4.10613	4.27015	0.814902	3.62005	0	-2.80064	-1.48575	0.300679	0.999117
hsa-miR-200b-3p	7.81166	3.90562	5.36477	6.13989	5.91815	-1.00784	-0.0112734	0.989091	0.999117
hsa-miR-1277-5p	0.100149	0.10415	0.0679085	0.567851	0	2.17715	1.12244	0.508819	0.999117
hsa-miR-4517	1.45217	4.42637	2.85216	3.58456	5.0727	1.30357	0.382471	0.736099	0.999117
hsa-miR-5583-3p	0.150224	0.989424	0.203726	0.248435	5.8477	3.64164	1.86459	0.246753	0.999117
hsa-miR-34b-3p	36.0037	24.2669	38.0288	15.9708	15.0772	-1.31013	-0.389705	0.667427	0.999117
hsa-miR-34a-3p	4.05605	9.16519	10.7295	7.2401	6.83405	1.24907	0.32086	0.73712	0.999117
hsa-miR-500a-5p	4.70703	6.249	6.79085	5.64302	4.79088	1.0485	0.0683327	0.938269	0.999117
hsa-miR-3610	4.25635	3.1245	2.78425	4.96869	21.9817	2.6783	1.42132	0.196715	0.999117
hsa-miR-216a-5p	9.36398	6.82182	8.62438	1.73904	9.29995	-1.24033	-0.310725	0.751435	0.999117
hsa-miR-216b-5p	1.80269	1.09357	1.76562	2.76827	5.49543	2.2885	1.1944	0.338566	0.999117
hsa-miR-580-5p	11.5172	3.90562	2.58052	5.07517	43.0475	2.18906	1.13031	0.290379	0.999117
hsa-miR-5700	0.350523	0.572825	0.339543	1.1357	0.281817	1.34841	0.43126	0.778085	0.999117
hsa-miR-365a-3p	250.874	173.045	252.552	185.119	210.728	1.01934	0.0276366	0.971766	0.999117
hsa-miR-5197-5p	0.300448	0.4166	0.203726	0.0709813	2.88862	2.87624	1.52418	0.363364	0.999117
hsa-miR-4506	1.75262	3.02035	0.135817	1.73904	9.86358	1.6349	0.709204	0.593219	0.999117
hsa-miR-513b-3p	6.40957	0.781124	2.3768	0.319416	6.48178	-1.17959	-0.238282	0.853613	0.999117
hsa-miR-8066	6.25934	0.260375	3.39543	3.37161	4.2977	1.13002	0.176346	0.886432	0.999117
hsa-miR-409-3p	753.975	707.386	862.981	578.001	190.79	-1.34333	-0.425817	0.613735	0.999117
hsa-miR-33a-3p	6.00897	4.68675	5.16105	10.8956	19.7272	2.22681	1.15498	0.183972	0.999117
hsa-miR-944	8.81316	5.36372	0.950719	5.11066	3.73407	-2.15354	-1.10671	0.319929	0.999117
hsa-miR-4760-3p	0.150224	0.260375	0.814902	1.06472	0	3.03876	1.60348	0.310096	0.999117
hsa-miR-302f	0.200299	1.30187	3.59915	0.0709813	0.0704542	1.64725	0.720061	0.67989	0.999117
hsa-miR-32-3p	15.9738	10.6754	4.41405	9.75993	11.4136	-1.55979	-0.64135	0.471726	0.999117
hsa-miR-590-3p	142.062	103.837	185.458	94.3342	38.3271	-1.1595	-0.213502	0.7932	0.999117
hsa-miR-3529-3p	0.350523	0.156225	0.950719	3.12318	0.0704542	5.38742	2.42959	0.133582	0.999117
hsa-miR-624-3p	17.6263	11.0399	12.0198	28.357	25.9271	1.5435	0.626204	0.405914	0.999117
hsa-miR-338-5p	0.300448	0.052075	0.203726	0	0	-2.75528	-1.4622	0.387422	0.999117
hsa-miR-10523-5p	6.35949	2.44752	2.44471	2.87474	4.36816	-1.36924	-0.453379	0.688123	0.999117
hsa-miR-7849-3p	2.45366	4.21807	2.30889	4.61379	0.422725	-1.34851	-0.431363	0.730014	0.999117
hsa-miR-8485	5.10762	2.55167	3.87079	10.2923	6.90451	1.84082	0.880347	0.336408	0.999117
hsa-miR-329-3p	34.0508	34.2133	31.3737	46.2798	109.979	1.83163	0.873127	0.276896	0.999117
hsa-miR-6768-5p	8.16218	15.7787	1.69771	26.2986	13.4567	1.15567	0.208733	0.830939	0.999117
hsa-miR-4789-3p	0.300448	8.07162	3.66706	6.99166	0.422725	-1.13022	-0.176609	0.884134	0.999117
hsa-miR-4643	1.60239	11.821	3.66706	13.2025	23.6021	2.00907	1.00653	0.326665	0.999117
hsa-miR-602	2.25336	2.55167	0.950719	2.69729	0.211363	-1.8246	-0.867581	0.508858	0.999117
hsa-miR-4704-5p	1.10164	1.56225	0.950719	3.08769	0.774996	1.23536	0.304936	0.814709	0.999117
hsa-miR-6757-3p	1.95292	5.10335	4.48196	9.01463	0	1.27662	0.352334	0.783918	0.999117
hsa-miR-5683	3.60538	2.60375	2.58052	1.24217	0.352271	-2.22915	-1.15649	0.364335	0.999117
hsa-miR-3120-3p	2.35351	0.052075	3.80288	3.83299	0.0704542	2.13093	1.09148	0.471478	0.999117
hsa-miR-6856-3p	2.85426	0.260375	1.49399	0.248435	3.17044	1.04307	0.0608324	0.968579	0.999117
hsa-miR-4438	3.15471	0.989424	1.69771	0.283925	2.39544	-1.4385	-0.524563	0.711157	0.999117
hsa-miR-101-3p	2.60389	7.81124	7.67366	5.03967	7.5386	1.29256	0.370231	0.661212	0.999117
hsa-miR-144-3p	0.100149	1.0415	0.47536	4.40084	0.140908	2.93361	1.55268	0.318887	0.999117
hsa-miR-376c-3p	1252.52	939.38	1489.91	758.294	325.71	-1.27738	-0.353184	0.680705	0.999117
hsa-miR-5580-3p	8.21226	2.9162	11.884	7.9854	13.809	2.01009	1.00726	0.244046	0.999117
hsa-miR-4802-3p	11.1667	8.64444	13.5817	3.51358	0.84545	-1.65749	-0.729002	0.491669	0.999117
hsa-miR-942-3p	14.2713	8.90482	8.28484	5.67851	3.17044	-2.02728	-1.01954	0.294317	0.999117
hsa-miR-323a-3p	421.579	649.114	599.904	249.925	207.981	-1.51834	-0.602492	0.505915	0.999117
hsa-miR-181a-5p	7643.96	8390.73	14487.9	4343.7	3289.43	-1.08729	-0.120741	0.896701	0.999117
hsa-miR-1255b-2-3p	13.6704	43.5347	50.456	12.8476	49.8816	1.31822	0.398589	0.651098	0.999117
hsa-miR-634	7.26084	3.64525	10.4579	3.65554	7.04542	1.28598	0.362871	0.665493	0.999117
hsa-miR-1911-3p	7.16069	13.4353	15.1436	5.60753	0.563633	-1.44942	-0.535476	0.633797	0.999117
hsa-miR-6753-5p	2.15321	7.18634	2.10516	4.50731	0.493179	-1.9515	-0.964587	0.424318	0.999117
hsa-miR-181c-3p	9.16368	4.68675	8.7602	4.96869	3.87498	-1.18304	-0.242494	0.769952	0.999117
hsa-miR-1295b-5p	0.300448	3.43695	1.76562	0.106472	0.352271	-2.53489	-1.34193	0.404749	0.999117
hsa-miR-3130-5p	73.4096	100.14	77.212	40.6368	99.6222	-1.19798	-0.260598	0.746148	0.999117
hsa-miR-660-5p	47.571	51.9187	91.9481	42.4468	11.9772	-1.01961	-0.0280108	0.974406	0.999117
hsa-miR-4640-3p	3.45516	9.00897	17.3167	12.6347	3.59316	1.79472	0.843762	0.360654	0.999117
hsa-miR-5195-5p	39.8094	53.8455	71.3718	25.5178	20.7135	-1.19505	-0.257066	0.759742	0.999117
hsa-miR-941	95.7429	134.822	157.616	78.4699	79.6837	-1.09557	-0.131684	0.863975	0.999117
hsa-miR-100-5p	47691.5	44086.8	63427	30504.9	18762.3	-1.2216	-0.288774	0.696155	0.999117
hsa-miR-10a-5p	7470.4	7055.17	10108.9	5619.24	2124.83	-1.22044	-0.287397	0.754496	0.999117
hsa-miR-6510-3p	2.00299	2.75997	2.30889	2.37787	8.4545	1.82716	0.869601	0.450503	0.999117
hsa-miR-4523	1.90284	1.2498	1.08654	7.27559	3.66362	2.55273	1.35204	0.257061	0.999117
hsa-miR-4655-5p	5.00747	5.36372	4.0066	2.91023	0.634088	-2.0503	-1.03584	0.374579	0.999117
hsa-miR-6800-3p	0.400598	0.4166	1.96935	0.283925	0.563633	2.22925	1.15656	0.464332	0.999117
hsa-miR-619-3p	13.1196	14.1123	11.3407	6.35283	5.8477	-1.74262	-0.801255	0.335469	0.999117
hsa-miR-7851-3p	6.15919	6.14485	1.90144	4.04594	6.27042	-1.51146	-0.595941	0.593297	0.999117
hsa-miR-6782-3p	0.100149	1.77055	3.12379	1.41963	0.281817	1.7149	0.778126	0.613641	0.999117
hsa-miR-521	5.45815	9.21727	0.339543	3.19416	12.6818	-1.35876	-0.442294	0.689415	0.999117
hsa-miR-122-3p	0.250374	2.03092	2.78425	0.141963	1.47954	1.27684	0.352573	0.817901	0.999117
hsa-miR-3939	4.00598	3.43695	3.73497	8.44678	5.00225	1.55682	0.638602	0.53007	0.999117
hsa-miR-574-3p	614.067	519.864	757.452	462.018	472.113	-1.0056	-0.0080606	0.992222	0.999117
hsa-miR-4445-3p	0.100149	5.2075	1.22235	1.24217	4.64998	-1.12115	-0.164984	0.907188	0.999117
hsa-miR-433-5p	43.565	18.3825	21.5949	28.3216	39.1725	-1.04341	-0.0612995	0.93815	0.999117
hsa-miR-1277-3p	8.36248	9.11312	6.24758	7.20461	5.77724	-1.32693	-0.408096	0.656475	0.999117
hsa-miR-598-3p	16.3744	10.3108	10.5937	4.50731	2.95908	-2.21994	-1.15052	0.225469	0.999117
hsa-miR-4637	0.100149	0.260375	0.950719	1.81002	0.422725	5.90503	2.56195	0.113925	0.999117
hsa-miR-28-3p	336.152	355.516	472.711	341.101	305.207	1.07847	0.108985	0.881026	0.999117
hsa-miR-625-3p	18.5277	10.415	14.125	12.2798	13.5977	-1.08792	-0.121577	0.886884	0.999117
hsa-miR-888-5p	1.70254	1.56225	0.950719	2.94573	0	-1.24354	-0.314449	0.834493	0.999117
hsa-miR-4798-3p	1.55232	3.1245	1.69771	2.02297	1.47954	-1.32247	-0.403234	0.753378	0.999117
hsa-miR-3680-5p	3.35501	1.97885	2.58052	5.46556	5.28406	1.6729	0.74235	0.500093	0.999117
hsa-miR-512-5p	5.70852	1.97885	1.42608	0.212944	5.28406	-1.67399	-0.74329	0.58907	0.999117
hsa-miR-510-5p	3.45516	0.260375	0.203726	3.01671	3.3818	1.18509	0.245002	0.859621	0.999117
hsa-miR-3145-5p	15.4731	1.6664	2.58052	6.17538	0.0704542	-2.89947	-1.53579	0.224101	0.999117
hsa-miR-508-5p	6.00897	13.7999	6.58713	12.6347	5.42497	-1.19909	-0.261936	0.757147	0.999117
hsa-miR-4636	12.8692	21.6632	13.1063	7.84344	0.140908	-2.45397	-1.29512	0.226481	0.999117
hsa-miR-5684	38.858	25.1522	14.7361	47.2736	60.1679	1.27257	0.347749	0.683701	0.999117
hsa-miR-4714-5p	26.3393	33.2238	28.3858	41.808	68.0587	1.54675	0.629243	0.458778	0.999117
hsa-miR-3664-5p	16.6248	10.6233	11.2049	7.9854	19.6567	-1.05596	-0.0785555	0.929077	0.999117
hsa-miR-4724-5p	1.00149	4.47845	0.135817	3.51358	6.41133	1.22343	0.29093	0.822899	0.999117
hsa-miR-888-3p	1.75262	2.7079	1.42608	4.68477	0.0704542	-1.074	-0.102994	0.941336	0.999117
hsa-miR-4418	2.20329	4.73882	6.31549	3.37161	5.28406	1.42706	0.51305	0.595496	0.999117
hsa-miR-217-5p	1.45217	0.260375	2.64843	2.37787	0	1.95189	0.964874	0.545895	0.999117
hsa-miR-3654	3.85576	1.19772	2.64843	2.91023	14.2317	2.59928	1.37811	0.221608	0.999117
hsa-miR-1243	3.75561	2.86412	0.271634	4.1879	12.7522	1.73027	0.790999	0.506287	0.999117
hsa-miR-193a-3p	1135.39	713.844	1198.79	776.82	579.345	-1.08569	-0.118617	0.885436	0.999117
hsa-miR-892b	14.8722	16.6119	6.79085	23.4593	42.6952	1.54412	0.626788	0.491124	0.999117
hsa-miR-4318	5.10762	6.09277	4.61778	2.05846	3.73407	-1.64455	-0.717692	0.483198	0.999117
hsa-miR-892a	3.40508	3.3328	2.10516	1.31315	0.140908	-2.8191	-1.49523	0.263033	0.999117
hsa-miR-452-5p	0.0500747	1.8747	1.69771	3.12318	0.211363	1.74754	0.805323	0.597741	0.999117
hsa-miR-9898	2.60389	0.31245	0.203726	2.44886	6.48178	2.07959	1.0563	0.449189	0.999117
hsa-miR-374c-3p	3.20478	4.42637	1.6298	2.51984	10.2159	1.25023	0.322192	0.763588	0.999117
hsa-miR-890	32.8991	26.2458	5.16105	55.9333	57.2792	1.33446	0.416258	0.650554	0.999117
hsa-miR-12126	5.1577	0.6249	1.08654	4.25888	5.49543	1.24941	0.321247	0.792216	0.999117
hsa-miR-5003-3p	2.55381	2.13507	0.271634	4.11692	5.42497	1.3955	0.480777	0.692356	0.999117
hsa-miR-5680	2.55381	1.40602	0.203726	3.30063	0.140908	-1.60187	-0.679761	0.631504	0.999117
hsa-miR-4773	3.75561	1.30187	3.25961	1.88101	0	-1.47308	-0.558837	0.69396	0.999117
hsa-miR-5197-3p	1.10164	2.4996	2.03726	3.47809	9.29995	2.73002	1.44891	0.227483	0.999117
hsa-miR-3154	16.6248	38.3792	3.53124	8.02089	54.3906	-1.25171	-0.323904	0.757986	0.999117
hsa-miR-4524b-3p	2.30344	9.06104	2.98797	6.56577	3.17044	-1.33103	-0.412543	0.703386	0.999117
hsa-miR-6502-3p	2.25336	2.39545	0.950719	2.55533	0.140908	-1.87061	-0.903507	0.499017	0.999117
hsa-miR-483-5p	6.60987	7.34257	15.0078	11.57	3.59316	1.44284	0.528916	0.560583	0.999117
hsa-miR-6863	9.3139	6.97804	1.96935	5.85596	47.1338	2.24653	1.1677	0.257068	0.999117
hsa-miR-4499	7.16069	1.19772	0.0679085	6.88519	0.774996	-1.61308	-0.689816	0.609256	0.999117
hsa-miR-4463	1.55232	1.8747	0.339543	2.59082	3.59316	1.27018	0.345029	0.793462	0.999117
hsa-miR-6758-5p	1.95292	6.35315	2.78425	0.141963	33.1839	2.89351	1.53282	0.205011	0.999117
hsa-miR-6529-5p	0.400598	0.10415	0.135817	1.56159	1.47954	4.13001	2.04615	0.214237	0.999117
hsa-miR-2278	1.70254	2.81205	2.30889	4.40084	0	-1.00534	-0.00769039	0.995899	0.999117
hsa-miR-3125	15.3229	11.3523	2.03726	14.3027	57.4906	1.84413	0.882944	0.369883	0.999117
hsa-miR-5007-5p	2.35351	0.885274	2.92007	2.30689	0.422725	1.16617	0.221779	0.865328	0.999117
hsa-miR-5586-3p	4.30643	3.80147	1.42608	1.45512	0.0704542	-4.04802	-2.01722	0.132689	0.999117
hsa-miR-577	5.7586	5.57202	1.96935	1.63257	8.17268	-1.45137	-0.537412	0.615639	0.999117
hsa-miR-5694	2.00299	6.30107	3.12379	6.8497	0.0704542	-1.23562	-0.305232	0.810564	0.999117
hsa-miR-7161-3p	6.55979	19.2677	3.12379	4.04594	14.3022	-1.80719	-0.85375	0.356178	0.999117
hsa-miR-548p	0.200299	1.30187	1.15444	1.5261	0	1.19764	0.260191	0.874144	0.999117
hsa-miR-451b	5.45815	1.8747	1.29026	2.05846	0.281817	-2.96987	-1.5704	0.219867	0.999117
hsa-miR-3942-5p	4.1562	0.989424	0.271634	1.56159	0.0704542	-3.91143	-1.9677	0.201624	0.999117
hsa-miR-3908	6.91031	2.18715	4.41405	6.42381	0.704542	-1.17739	-0.235592	0.827126	0.999117
hsa-miR-29a-3p	497.142	462.79	726.349	505.494	160.706	-1.03399	-0.0482169	0.957827	0.999117
hsa-miR-15a-5p	7586.52	4602.59	6775.23	4393.96	1492.43	-1.44402	-0.530092	0.56244	0.999117
hsa-miR-503-5p	50.275	65.1979	66.3466	44.6473	12.3999	-1.40344	-0.488965	0.564649	0.999117
hsa-miR-646	3.85576	2.86412	3.66706	1.98748	3.31135	-1.15435	-0.207083	0.85564	0.999117
hsa-miR-4690-5p	4.90733	5.98862	3.39543	9.05012	18.7408	1.90555	0.930208	0.308347	0.999117
hsa-miR-4274	3.20478	4.3743	1.42608	4.54281	7.46814	1.18126	0.240323	0.819008	0.999117
hsa-miR-4519	4.10613	3.3328	3.05588	0.496869	0.563633	-2.73514	-1.45161	0.275845	0.999117
hsa-miR-1179	0.250374	0.468675	3.32752	1.98748	0.281817	5.12392	2.35725	0.11446	0.999117
hsa-miR-449b-3p	6.65994	3.3328	5.16105	4.29437	3.24089	-1.18021	-0.239039	0.813561	0.999117
hsa-miR-6858-3p	5.90882	3.80147	3.05588	3.30063	11.6249	1.22924	0.29777	0.7474	0.999117
hsa-miR-4676-5p	0.801196	3.22865	6.24758	6.53028	4.22725	2.81686	1.49409	0.157832	0.999117
hsa-miR-4323	6.25934	5.10335	1.90144	4.15241	4.01589	-1.67198	-0.741561	0.468132	0.999117
hsa-miR-3943	0.250374	4.53052	0.407451	2.37787	5.70679	1.18285	0.242266	0.861245	0.999117
hsa-miR-6769a-3p	9.56428	4.84297	3.46333	3.01671	11.3431	-1.21734	-0.283733	0.778857	0.999117
hsa-miR-3940-3p	2.75411	12.8625	4.61778	6.92068	6.27042	-1.31289	-0.392742	0.676052	0.999117
hsa-miR-4687-5p	11.1667	11.144	9.71092	6.77872	21.7703	1.1396	0.188529	0.842307	0.999117
hsa-miR-6779-3p	3.05456	4.42637	2.98797	2.41337	4.79088	-1.11846	-0.161516	0.885714	0.999117
hsa-miR-129-1-3p	19.1786	17.2368	23.2926	21.8268	22.4749	1.23029	0.298994	0.685296	0.999117
hsa-miR-6746-3p	13.2698	44.1596	8.35275	23.3174	16.2045	-1.79648	-0.845176	0.33443	0.999117
hsa-miR-4293	4.3565	2.96827	6.24758	2.83925	5.14315	1.27793	0.353806	0.731714	0.999117
hsa-miR-596	18.8281	52.6999	12.4952	33.7871	26.7021	-1.46857	-0.55441	0.500057	0.999117
hsa-miR-3614-3p	3.70553	5.51995	1.15444	9.75993	7.25678	1.3164	0.396601	0.664576	0.999117
hsa-miR-4670-5p	0.200299	0.2083	0	3.0522	0	4.88677	2.28888	0.214372	0.999117
hsa-miR-7846-3p	4.40658	4.73882	0.611177	6.24636	2.74771	-1.41611	-0.501935	0.647837	0.999117
hsa-miR-4781-5p	19.9798	12.8625	4.0066	15.048	67.7065	1.7602	0.815738	0.425857	0.999117
hsa-miR-6854-5p	12.2683	24.8918	20.78	17.3904	17.8249	1.00418	0.00601582	0.993733	0.999117
hsa-miR-22-3p	19108	11096.9	19725.3	11531.4	4256.63	-1.27578	-0.351385	0.640569	0.999117
hsa-miR-21-5p	485515	357699	616892	263065	149333	-1.22883	-0.297284	0.701392	0.999117
hsa-miR-4453	5.05755	2.18715	3.39543	6.24636	7.18633	1.54836	0.630744	0.566029	0.999117
hsa-miR-208a-5p	508.759	310.263	610.769	210.46	97.8608	-1.33672	-0.418695	0.62093	0.999117
hsa-miR-4496	4.20628	2.34337	5.16105	3.54907	15.2886	2.43097	1.28153	0.179092	0.999117
hsa-miR-12124	3.50523	2.75997	3.39543	0	0	-2.76631	-1.46797	0.36229	0.999117
hsa-miR-3914	3.80568	0.4166	4.68569	4.82673	3.87498	2.10908	1.07661	0.361436	0.999117
hsa-miR-4476	8.11211	4.47845	3.32752	10.2568	13.034	1.40962	0.495307	0.601097	0.999117
hsa-miR-1197	9.96487	3.22865	6.24758	9.65346	6.69315	1.14427	0.19443	0.837	0.999117
hsa-miR-4759	0.901345	1.09357	0.814902	0.106472	11.2727	4.04507	2.01616	0.166316	0.999117
hsa-miR-28-5p	314.219	293.494	426.533	235.587	111.458	-1.17839	-0.236818	0.77077	0.999117
hsa-miR-4695-5p	2.70404	1.2498	2.85216	7.34657	6.90451	2.88407	1.52811	0.133015	0.999117
hsa-miR-4779	3.90583	13.8519	0.814902	6.38832	30.9294	1.43055	0.516572	0.644507	0.999117
hsa-miR-4433b-3p	0.450673	7.81124	5.09314	5.07517	4.93179	1.2185	0.285112	0.799422	0.999117
hsa-miR-4661-3p	51.5269	45.878	31.6454	47.4155	56.5747	-1.07702	-0.107044	0.892991	0.999117
hsa-miR-10524-5p	2.05306	0.833199	2.3768	4.61379	3.73407	2.48536	1.31346	0.298999	0.999117
hsa-miR-2392	126.99	182.314	142.472	126.24	127.874	-1.17005	-0.226571	0.768912	0.999117
hsa-miR-5582-5p	1.45217	1.71847	0	2.02297	0.211363	-2.07693	-1.05445	0.498	0.999117
hsa-miR-3622a-5p	5.1577	1.8747	3.1917	5.21713	0.140908	-1.22849	-0.29689	0.81008	0.999117
hsa-miR-6808-5p	18.3774	15.0497	17.3167	15.7933	13.5272	-1.0738	-0.102732	0.895835	0.999117
hsa-miR-2682-5p	2.95441	4.06185	2.78425	2.98122	4.64998	-1.02353	-0.0335536	0.975962	0.999117
hsa-miR-4717-5p	5.20777	6.35315	3.66706	5.03967	5.91815	-1.18158	-0.240715	0.797197	0.999117
hsa-miR-4747-3p	5.90882	12.2376	4.48196	10.8601	7.46814	-1.18703	-0.247358	0.780653	0.999117
hsa-miR-1245b-5p	8.31241	9.73802	6.99458	13.9123	3.45225	-1.10527	-0.144402	0.869475	0.999117
hsa-miR-3186-5p	3.45516	3.90562	1.29026	3.76201	9.3704	1.30304	0.381884	0.71687	0.999117
hsa-miR-3929	3.9559	3.43695	6.58713	3.47809	0	-1.10139	-0.139322	0.916248	0.999117
hsa-miR-5584-5p	0.100149	2.7079	0.0679085	1.24217	7.60905	2.10946	1.07687	0.494224	0.999117
hsa-miR-6750-5p	9.26383	79.5185	5.22896	38.7913	62.6338	-1.24857	-0.320278	0.748203	0.999117
hsa-miR-9500	10.5658	10.8837	4.61778	16.1837	61.9997	2.57155	1.36264	0.165144	0.999117
hsa-miR-6760-5p	2.15321	2.18715	0.203726	6.77872	8.24314	2.33593	1.224	0.29625	0.999117
hsa-miR-1321	16.8752	6.82182	16.8413	20.833	14.3022	1.46356	0.549482	0.517209	0.999117
hsa-miR-6757-5p	6.55979	4.166	4.34614	4.36535	0.634088	-1.71222	-0.775865	0.494914	0.999117
hsa-miR-4436b-3p	5.40807	4.84297	1.83353	1.45512	0.493179	-3.97357	-1.99044	0.122241	0.999117
hsa-miR-4761-3p	0	0.31245	0.203726	0.0709813	0.211363	-1.02762	-0.0393117	0.979736	0.999117
hsa-miR-6895-5p	0.901345	4.32222	0.543268	1.9165	10.2863	1.62228	0.698019	0.575319	0.999117
hsa-miR-7160-3p	0.350523	4.32222	5.97595	4.32986	2.67726	1.85122	0.888478	0.460707	0.999117
hsa-miR-4512	1.60239	2.65582	1.96935	2.98122	5.14315	1.57252	0.653078	0.5884	0.999117
hsa-miR-3141	13.3199	3.9577	7.74157	9.08561	44.9498	2.38063	1.25135	0.14386	0.999117
hsa-miR-4446-3p	87.9813	91.1833	56.6357	26.9019	66.6496	-1.79158	-0.841231	0.304056	0.999117
hsa-miR-3158-3p	34.6517	11.7169	3.12379	26.0502	15.8522	-1.54282	-0.625566	0.48132	0.999117
hsa-miR-6783-5p	46.4694	98.7862	16.7734	62.0377	82.5018	-1.35052	-0.433514	0.621989	0.999117
hsa-miR-4688	1.60239	1.09357	1.76562	1.66806	0.281817	-1.07433	-0.103444	0.943071	0.999117
hsa-miR-6085	5.90882	4.11392	11.6803	1.49061	0.704542	-1.0856	-0.118494	0.918891	0.999117
hsa-miR-6805-5p	2.55381	1.19772	4.7536	2.73278	0.422725	1.40445	0.490008	0.709697	0.999117
hsa-miR-6732-5p	0.200299	0.4166	0.271634	0.106472	2.11363	2.6165	1.38764	0.383336	0.999117
hsa-miR-6782-5p	2.40359	2.55167	0.611177	2.59082	2.88862	-1.21164	-0.276961	0.826186	0.999117
hsa-miR-6841-5p	0.200299	3.7494	0.882811	0.248435	0.140908	-4.64529	-2.21577	0.156937	0.999117
hsa-miR-6755-5p	0.701046	0.676975	3.32752	3.54907	0.352271	3.49137	1.80379	0.171517	0.999117
hsa-miR-1178-5p	3.85576	3.17657	0.135817	4.25888	1.26818	-1.84135	-0.880761	0.519243	0.999117
hsa-miR-296-3p	10.7661	26.402	10.5937	48.1253	38.6793	1.74779	0.805529	0.348432	0.999117
hsa-miR-3927-3p	87.2302	118.627	153.541	58.3822	29.168	-1.2809	-0.357157	0.68021	0.999117
hsa-miR-196a-5p	531.143	469.352	232.315	630.634	467.463	-1.12791	-0.173651	0.837817	0.999117
hsa-miR-370-5p	24.9873	17.0285	21.527	16.5032	11.9068	-1.26201	-0.335722	0.671221	0.999117
hsa-miR-431-3p	5.50822	1.0415	5.09314	8.94365	11.2022	2.56413	1.35847	0.166851	0.999117
hsa-miR-12114	9.61435	4.42637	4.88941	4.22339	23.5317	1.54662	0.629119	0.49339	0.999117
hsa-miR-6815-5p	6.05904	6.40522	10.4579	6.31734	15.7817	1.73094	0.791552	0.357856	0.999117
hsa-miR-154-5p	319.928	307.086	517.87	167.161	196.497	-1.06702	-0.0935909	0.906921	0.999117
hsa-miR-4464	1.95292	1.40602	2.98797	1.98748	0.0704542	1.00341	0.00490949	0.997191	0.999117
hsa-miR-329-5p	1.85277	3.43695	2.85216	2.62631	1.26818	-1.16296	-0.217796	0.866977	0.999117
hsa-miR-802	0.150224	5.93655	0.0679085	2.69729	3.59316	-1.43347	-0.519514	0.724737	0.999117
hsa-miR-624-5p	3.10463	7.23842	5.43268	9.72444	0.281817	-1.00237	-0.00341355	0.997406	0.999117
hsa-miR-1278	1.40209	4.00977	0.271634	8.12736	0.0704542	1.04785	0.0674323	0.961467	0.999117
hsa-miR-411-5p	17109.8	15713.4	19541.4	10008.1	11789.2	-1.19102	-0.252192	0.716204	0.999117
hsa-miR-1244	12.0179	4.00977	13.9212	4.08143	19.8681	1.5714	0.652052	0.48544	0.999117
hsa-miR-5588-3p	4.00598	1.40602	3.32752	3.90397	5.14315	1.51795	0.602123	0.590356	0.999117
hsa-miR-6838-3p	2.15321	0.572825	0.543268	3.51358	9.01813	3.1811	1.66953	0.185695	0.999117
hsa-miR-3174	1.05157	2.13507	2.17307	1.66806	0.0704542	-1.21538	-0.281408	0.84957	0.999117
hsa-miR-1245a	2.50374	3.48902	2.17307	3.83299	9.3704	1.70393	0.768867	0.465557	0.999117
hsa-miR-8062	5.50822	1.19772	7.80948	15.4739	7.18633	3.02939	1.59903	0.127894	0.999117
hsa-miR-130a-3p	253.428	194.812	288.407	184.835	58.0542	-1.26547	-0.339676	0.699853	0.999117
hsa-miR-371b-3p	4.90733	11.4565	1.42608	5.46556	11.2727	-1.35182	-0.434904	0.646061	0.999117
hsa-miR-371a-3p	3.90583	2.083	2.10516	0.106472	4.43861	-1.3583	-0.441804	0.745628	0.999117
hsa-miR-33b-3p	20.2302	21.1945	42.6465	14.3382	10.1454	1.07959	0.110481	0.888424	0.999117
hsa-miR-512-3p	0.300448	2.23922	2.71634	3.93946	0.352271	1.8451	0.883701	0.518572	0.999117
hsa-miR-520f-3p	2.05306	13.7478	8.62438	4.47182	1.19772	-1.65708	-0.728639	0.450967	0.999117
hsa-miR-12115	3.00448	6.249	3.93869	8.97914	18.5294	2.26247	1.1779	0.195016	0.999117
hsa-miR-3681-5p	3.70553	1.4581	6.24758	2.6618	0.352271	1.1943	0.25616	0.84414	0.999117
hsa-miR-1296-3p	5.25785	6.6656	0.203726	8.97914	9.29995	1.03421	0.0485254	0.965114	0.999117
hsa-miR-203b-5p	6.86024	8.17577	4.54987	4.9332	2.81817	-1.7954	-0.844302	0.32595	0.999117
hsa-miR-140-5p	637.401	936.516	1025.08	473.658	757.735	-1.04634	-0.0653556	0.936845	0.999117
hsa-miR-4280	24.3363	15.9349	49.8448	29.0669	8.4545	1.44617	0.532238	0.567357	0.999117
hsa-miR-4255	7.21076	17.9138	3.25961	5.74949	12.3295	-1.76797	-0.822093	0.357462	0.999117
hsa-miR-101-5p	5.05755	0.31245	1.08654	0.0354907	4.22725	-1.51069	-0.595203	0.690912	0.999117
hsa-miR-5000-5p	4.3565	2.23922	4.61778	0.177453	3.09998	-1.25964	-0.333014	0.804591	0.999117
hsa-miR-148b-5p	3.55531	6.61352	3.59915	9.5115	31.493	2.91977	1.54585	0.121312	0.999117
hsa-miR-5584-3p	0.450673	3.17657	1.90144	1.45512	5.0727	1.54124	0.624095	0.647203	0.999117
hsa-miR-4715-5p	6.76009	3.9577	25.1941	2.41337	2.18408	1.84989	0.887442	0.414398	0.999117
hsa-miR-4259	3.55531	7.39464	23.2926	2.94573	7.96132	2.0777	1.05498	0.337658	0.999117
hsa-miR-3163	2.20329	3.38487	1.42608	1.66806	0.0704542	-2.60571	-1.38168	0.310317	0.999117
hsa-miR-142-5p	3.75561	4.27015	5.97595	4.47182	3.59316	1.16258	0.217327	0.828387	0.999117
hsa-miR-369-3p	61.7422	49.1588	64.6489	23.6368	12.6818	-1.64797	-0.720693	0.40768	0.999117
hsa-miR-5692b	0.150224	0.156225	0.271634	1.63257	0	4.09868	2.03516	0.234115	0.999117
hsa-miR-300	314.169	206.946	353.735	218.587	46.6407	-1.26285	-0.33668	0.695976	0.999117
hsa-miR-4666a-3p	105.908	131.385	226.882	97.8123	42.7657	1.03231	0.0458785	0.955938	0.999117
hsa-miR-875-5p	0.300448	0.260375	0.407451	0.212944	0.211363	-1.06982	-0.0973639	0.946865	0.999117
hsa-miR-10397-3p	0.150224	2.65582	0.746994	2.59082	0.0704542	-1.22127	-0.288386	0.851608	0.999117
hsa-miR-3651	19.8797	16.7161	13.7175	19.3424	11.2022	-1.2315	-0.300411	0.6836	0.999117
hsa-miR-7705	13.1697	12.2897	5.50059	13.238	3.52271	-1.70358	-0.768567	0.383859	0.999117
hsa-miR-1295b-3p	3.40508	0.676975	0.814902	2.76827	3.24089	1.11549	0.157682	0.903165	0.999117
hsa-miR-135a-3p	12.0179	70.4574	6.04386	15.7579	52.2065	-1.67191	-0.741496	0.443727	0.999117
hsa-miR-410-3p	145.918	144.873	208.208	81.3091	83.9109	-1.16833	-0.224443	0.775239	0.999117
hsa-miR-5011-5p	3.85576	2.65582	6.3834	1.41963	0.140908	-1.23142	-0.30032	0.828831	0.999117
hsa-miR-3074-3p	0.0500747	0.885274	1.69771	0.0354907	2.95908	3.29663	1.72099	0.293065	0.999117
hsa-miR-8076	1.80269	0.052075	4.88941	1.24217	0.0704542	2.21601	1.14797	0.47482	0.999117
hsa-miR-656-3p	15.0224	11.9252	16.8413	8.41129	8.17268	-1.21295	-0.278514	0.746203	0.999117
hsa-miR-6074	3.70553	5.78032	4.34614	0.780795	8.10223	-1.08081	-0.112115	0.919158	0.999117
hsa-miR-34c-3p	88.4821	75.5087	72.5263	33.9291	18.459	-1.96951	-0.977833	0.230262	0.999117
hsa-miR-2115-3p	3.9559	12.9667	4.27824	5.46556	7.32723	-1.48696	-0.572363	0.536422	0.999117
hsa-miR-3617-3p	3.55531	2.65582	3.80288	7.66598	0.140908	1.24962	0.321487	0.799622	0.999117
hsa-miR-5094	5.1577	8.38407	5.50059	7.34657	5.14315	-1.11593	-0.158242	0.865854	0.999117
hsa-miR-217-3p	9.21375	27.1311	11.884	30.309	29.0271	1.30718	0.386457	0.670021	0.999117
hsa-miR-154-3p	79.068	62.3337	79.7925	29.4927	16.0636	-1.69243	-0.759097	0.361295	0.999117
hsa-miR-136-3p	10.5157	10.5712	14.125	8.34031	8.73632	-1.0196	-0.0279969	0.974197	0.999117
hsa-miR-2681-3p	0.801196	1.0415	1.15444	0.390397	0	-1.78918	-0.839296	0.610385	0.999117
hsa-miR-382-3p	9.66443	5.57202	15.8227	2.34238	0	-1.25859	-0.331813	0.783226	0.999117
hsa-miR-5092	2.65396	0.260375	0.407451	3.0522	0.140908	-1.19904	-0.261879	0.869049	0.999117
hsa-miR-5586-5p	12.2182	15.31	11.5444	25.5533	12.6113	1.20898	0.273794	0.711677	0.999117
hsa-miR-7151-5p	2.15321	3.69732	5.16105	6.49479	4.50907	1.86615	0.900063	0.365858	0.999117
hsa-miR-4733-5p	0.100149	2.13507	0.543268	0.212944	0	-4.3573	-2.12343	0.205789	0.999117
hsa-miR-188-5p	6.60987	5.10335	8.14902	4.32986	5.56588	1.0156	0.0223301	0.979304	0.999117
hsa-miR-362-5p	10.5157	15.3621	11.5444	11.9249	3.94543	-1.41139	-0.497116	0.573171	0.999117
hsa-miR-501-5p	4.60688	1.6664	1.6298	7.06264	9.3704	1.91788	0.939511	0.380943	0.999117
hsa-miR-5188	4.00598	3.64525	1.90144	2.98122	2.53635	-1.4799	-0.565496	0.617379	0.999117
hsa-miR-487b-3p	462.941	554.286	778.164	334.393	345.648	-1.04645	-0.0655018	0.941274	0.999117
hsa-miR-1285-5p	1.60239	2.55167	1.08654	3.4071	4.93179	1.51255	0.596981	0.634143	0.999117
hsa-miR-3675-3p	0.350523	0.364525	0.814902	0.106472	0	-1.1905	-0.25157	0.87404	0.999117
hsa-miR-3200-5p	0.300448	5.88447	3.66706	2.62631	5.0727	1.2232	0.290657	0.812149	0.999117
hsa-miR-4686	4.40658	1.40602	2.03726	5.53654	0.0704542	-1.13486	-0.182512	0.896955	0.999117
hsa-miR-3126-3p	15.7735	19.2157	13.1063	8.26933	5.63633	-1.94399	-0.959022	0.288184	0.999117
hsa-miR-1298-3p	3.15471	1.82262	0.203726	3.51358	1.83181	-1.33178	-0.413357	0.752321	0.999117
hsa-miR-200a-5p	17.2257	62.49	8.08111	33.8226	9.93404	-2.30247	-1.20318	0.181081	0.999117
hsa-miR-141-5p	4.00598	0.260375	2.64843	0.851776	0.0704542	-1.79164	-0.841278	0.593533	0.999117
hsa-miR-425-5p	526.336	437.013	752.291	267.28	95.5359	-1.29588	-0.373932	0.65175	0.999117
hsa-miR-4712-3p	1373.25	642.553	386.603	1093.96	958.67	-1.23958	-0.30985	0.713316	0.999117
hsa-miR-1272	5.1577	6.50937	2.92007	5.03967	10.8499	1.07199	0.100294	0.91777	0.999117
hsa-miR-1322	2.00299	1.71847	0.407451	1.56159	0.281817	-2.34642	-1.23046	0.388545	0.999117
hsa-miR-501-3p	4.60688	1.71847	5.16105	2.41337	3.09998	1.11636	0.158801	0.888862	0.999117
hsa-miR-532-5p	204.856	217.413	404.871	183.984	125.056	1.12703	0.172527	0.831947	0.999117
hsa-miR-4787-3p	0.600897	5.36372	4.07451	3.69103	0.0704542	-1.13942	-0.188304	0.895934	0.999117
hsa-miR-3146	2.10314	1.40602	1.90144	2.6618	3.73407	1.56329	0.644588	0.618615	0.999117
hsa-miR-4728-3p	3.05456	1.0415	2.17307	7.38206	0	1.55742	0.639157	0.644932	0.999117
hsa-miR-3688-3p	5.5583	0.2083	2.24098	6.56577	15.5704	2.81171	1.49145	0.188525	0.999117
hsa-miR-1843	6.15919	7.49879	5.77222	4.5783	17.2613	1.34316	0.425632	0.654698	0.999117
hsa-miR-1246	7.16069	4.06185	5.16105	9.1211	20.009	2.03279	1.02346	0.246528	0.999117
hsa-miR-183-5p	6.96039	2.03092	6.92667	5.43007	18.8113	2.30374	1.20398	0.243885	0.999117
hsa-miR-652-3p	382.571	331.509	412.68	244.744	123.083	-1.37234	-0.456639	0.560295	0.999117
hsa-miR-889-5p	38.2571	19.1636	28.0462	28.9604	12.6818	-1.23469	-0.304145	0.743691	0.999117
hsa-miR-6871-5p	7.06054	6.0407	2.24098	9.93739	22.8272	1.77947	0.831452	0.386489	0.999117
hsa-miR-3675-5p	2.05306	1.40602	1.6298	0	0.0704542	-3.06148	-1.61423	0.341918	0.999117
hsa-miR-6890-5p	1.75262	1.8747	1.08654	3.54907	0.0704542	-1.14283	-0.192606	0.888225	0.999117
hsa-miR-218-2-3p	44.4664	34.9423	28.182	71.1233	164.37	2.21316	1.14611	0.177195	0.999117
hsa-miR-758-5p	0.801196	2.2913	0.543268	3.90397	6.62269	2.38122	1.2517	0.307146	0.999117
hsa-miR-379-3p	501.348	638.804	742.24	466.809	394.825	-1.06635	-0.092684	0.91193	0.999117
hsa-miR-380-3p	6.91031	6.4573	5.29686	4.61379	5.42497	-1.33641	-0.418367	0.633347	0.999117
hsa-miR-12129	2.15321	2.44752	2.24098	2.41337	4.01589	1.23228	0.301331	0.804355	0.999117
hsa-miR-3668	2.80419	2.7079	2.3768	2.44886	0.140908	-1.65088	-0.723237	0.59956	0.999117
hsa-miR-7852-3p	0.250374	2.23922	2.3768	6.0689	1.54999	2.68444	1.42462	0.289279	0.999117
hsa-miR-6834-3p	6.60987	3.28072	3.05588	4.68477	5.42497	-1.12596	-0.171154	0.864143	0.999117
hsa-miR-654-3p	513.767	464.665	538.854	330.17	231.442	-1.3337	-0.41543	0.638815	0.999117
hsa-miR-455-5p	53.0292	45.5135	50.7956	32.7934	16.2045	-1.48103	-0.566605	0.51304	0.999117
hsa-miR-4491	0.150224	4.27015	4.68569	3.22965	10.4977	2.76942	1.46958	0.207976	0.999117
hsa-miR-299-3p	10.3655	9.06104	18.4032	6.17538	3.31135	-1.04606	-0.0649662	0.944701	0.999117
hsa-miR-4781-3p	9.96487	8.07162	4.54987	20.6911	32.6907	2.14034	1.09784	0.175128	0.999117
hsa-miR-4307	132.848	54.6266	106.141	94.0148	81.7268	1.00234	0.00337159	0.996742	0.999117
hsa-miR-12132	3.30493	0.989424	0.679085	3.97495	8.80677	2.08354	1.05904	0.381325	0.999117
hsa-miR-126-5p	5.20777	4.27015	1.49399	1.24217	7.25678	-1.43088	-0.516906	0.665344	0.999117
hsa-miR-4272	3.15471	3.43695	1.49399	5.99792	0.140908	-1.28554	-0.362378	0.773732	0.999117
hsa-miR-506-5p	2.35351	2.65582	0.339543	1.49061	0	-3.95852	-1.98496	0.200458	0.999117
hsa-miR-664a-3p	10.4656	14.1123	30.0835	7.66598	9.86358	1.28946	0.366764	0.689909	0.999117
hsa-miR-3938	2.90434	10.5712	2.64843	3.01671	15.0067	1.02073	0.0295975	0.97526	0.999117
hsa-miR-4778-5p	0.150224	1.35395	0.339543	1.34865	8.24314	4.36478	2.12591	0.139571	0.999117
hsa-miR-25-3p	20604.7	16248.7	19649.2	16181.7	8909.63	-1.23557	-0.30518	0.664005	0.999117
hsa-miR-4699-3p	0.500747	0.6249	0.746994	0.283925	6.7636	4.55088	2.18615	0.124467	0.999117
hsa-miR-5002-5p	17.8767	48.1173	3.87079	35.6681	22.1226	-1.60387	-0.681557	0.458728	0.999117
hsa-miR-3613-3p	4.05605	2.81205	0.47536	6.88519	5.91815	1.29124	0.368753	0.740957	0.999117
hsa-miR-1323	18.6779	3.80147	5.5685	12.8476	0.352271	-1.79233	-0.841839	0.44608	0.999117
hsa-miR-8063	3.10463	0.364525	0.611177	0.177453	4.57952	1.02536	0.0361341	0.98024	0.999117
hsa-miR-4698	3.65546	3.64525	17.1129	2.48435	4.22725	2.16823	1.11652	0.259398	0.999117
hsa-miR-6715a-3p	20.9813	17.0806	27.7067	12.9186	22.4044	1.10025	0.137828	0.858466	0.999117
hsa-miR-330-3p	69.2534	80.9766	32.7319	58.7725	125.549	-1.03841	-0.0543759	0.948173	0.999117
hsa-miR-520g-3p	12.0179	8.48822	12.9026	6.53028	4.72043	-1.27587	-0.351479	0.70498	0.999117
hsa-miR-4762-5p	76.1637	45.149	59.5558	89.543	41.1452	1.04632	0.0653278	0.93637	0.999117
hsa-miR-105-5p	61.2915	61.3964	11.2049	96.925	78.9791	1.01695	0.0242548	0.97878	0.999117
hsa-miR-3065-5p	1.80269	2.18715	7.60575	5.714	0	2.22256	1.15222	0.401026	0.999117
hsa-miR-4709-5p	1.75262	0.364525	1.49399	0.177453	3.94543	1.74993	0.807295	0.590053	0.999117
hsa-miR-4714-3p	2.95441	1.77055	0.814902	2.44886	10.4272	1.92396	0.944077	0.434689	0.999117
hsa-miR-335-5p	8.26233	2.86412	1.49399	1.63257	3.24089	-2.63715	-1.39898	0.230072	0.999117
hsa-miR-6830-5p	11.0665	24.2149	4.54987	88.3718	30.1544	2.3262	1.21797	0.219437	0.999117
hsa-miR-3922-5p	3.55531	1.30187	5.5685	2.94573	7.74996	2.21384	1.14655	0.277325	0.999117
hsa-miR-4761-5p	13.0194	11.3003	8.82811	56.927	14.2317	2.19471	1.13403	0.238388	0.999117
hsa-miR-224-5p	24.6368	21.3507	31.1021	5.39458	5.21361	-1.65528	-0.727071	0.427759	0.999117
hsa-miR-95-5p	2.30344	1.6664	3.25961	3.0522	0	1.06192	0.0866683	0.953253	0.999117
hsa-miR-6826-5p	0.0500747	1.2498	0.271634	3.0522	3.3818	3.42254	1.77507	0.216377	0.999117
hsa-miR-16-2-3p	6.30942	7.60294	3.87079	1.34865	11.6249	-1.24368	-0.314611	0.725902	0.999117
hsa-miR-4705	2.00299	0.885274	0.271634	0.141963	6.19997	1.51732	0.601529	0.67566	0.999117
hsa-miR-125b-2-3p	2.90434	2.39545	1.42608	5.89145	8.80677	2.0259	1.01856	0.327824	0.999117
hsa-miR-1228-3p	14.6218	3.85355	9.43928	5.50105	2.6068	-1.57926	-0.659248	0.498791	0.999117
hsa-miR-216b-3p	0.200299	0.676975	0.0679085	2.05846	0	1.63267	0.707233	0.687904	0.999117
hsa-miR-128-3p	330.794	222.568	136.496	386.884	304.432	-1.00257	-0.00370792	0.996216	0.999117
hsa-miR-4717-3p	3.50523	1.19772	2.30889	4.64928	0.281817	1.03302	0.0468678	0.972051	0.999117
hsa-miR-1226-3p	16.074	19.6323	22.5456	4.82673	5.35452	-1.63892	-0.712746	0.457448	0.999117
hsa-miR-4733-3p	4.10613	7.23842	3.87079	6.81421	2.18408	-1.30797	-0.387324	0.725109	0.999117
hsa-miR-500b-3p	7.16069	3.69732	3.93869	3.0522	0.563633	-2.14599	-1.10164	0.351543	0.999117
hsa-miR-6865-3p	7.71151	3.5411	3.1917	3.47809	4.22725	-1.55308	-0.635136	0.532577	0.999117
hsa-miR-3620-3p	9.5142	31.7657	19.2181	24.5595	5.49543	-1.25513	-0.327836	0.701258	0.999117
hsa-miR-181d-3p	4.70703	2.81205	0.271634	7.45304	7.5386	1.35406	0.437296	0.716317	0.999117
hsa-miR-1306-5p	14.2212	18.1742	13.7175	16.2192	2.32499	-1.5033	-0.588132	0.534042	0.999117
hsa-miR-3622a-3p	1.55232	1.61432	1.15444	3.30063	0.140908	-1.01937	-0.0276842	0.98377	0.999117
hsa-miR-6765-3p	40.4604	47.232	48.283	32.2255	34.6635	-1.14433	-0.194507	0.809691	0.999117
hsa-miR-3186-3p	5.05755	6.61352	4.14242	0.283925	2.18408	-2.66582	-1.41458	0.247303	0.999117
hsa-miR-11401	5.20777	6.249	10.1863	1.27766	10.2863	1.26119	0.33478	0.729712	0.999117
hsa-miR-6767-3p	5.90882	14.1123	5.5685	9.93739	6.62269	-1.34999	-0.432953	0.630332	0.999117
hsa-miR-4999-3p	1.90284	1.09357	2.10516	2.20042	0.140908	-1.00355	-0.00511018	0.997216	0.999117
hsa-miR-483-3p	18.9283	29.3182	20.1009	41.0627	23.7431	1.17602	0.23391	0.772775	0.999117
hsa-miR-4639-3p	3.10463	0.4166	0.611177	0.319416	0.493179	-3.74028	-1.90315	0.212166	0.999117
hsa-miR-6890-3p	11.1166	3.90562	13.1743	10.6827	5.21361	1.29044	0.367858	0.688	0.999117
hsa-miR-6760-3p	10.4656	6.76975	5.63641	8.94365	12.5408	1.04797	0.0675924	0.935021	0.999117
hsa-miR-1208	0.250374	1.61432	2.58052	1.84551	0.211363	1.65882	0.730156	0.630687	0.999117
hsa-miR-3614-5p	1.85277	1.6664	6.11177	3.26514	5.8477	2.83138	1.50151	0.180059	0.999117
hsa-miR-6500-3p	6.71002	8.54029	3.05588	7.48853	1.47954	-1.88219	-0.912414	0.328787	0.999117
hsa-miR-589-3p	0.100149	2.60375	4.27824	0.0354907	3.09998	1.81935	0.863426	0.574681	0.999117
hsa-miR-4494	8.41256	1.51017	5.90804	6.1044	8.4545	1.37271	0.457031	0.603373	0.999117
hsa-miR-499b-5p	1.20179	1.2498	0.135817	2.62631	2.95908	1.55744	0.639173	0.637415	0.999117
hsa-miR-3919	7.41106	7.03012	5.90804	13.8769	25.9271	2.108	1.07588	0.232057	0.999117
hsa-miR-6501-3p	4.00598	0.989424	4.0066	1.95199	0.352271	-1.18753	-0.247963	0.855415	0.999117
hsa-miR-6847-5p	1.55232	0.052075	2.64843	0.0354907	3.59316	2.58384	1.36952	0.401981	0.999117
hsa-miR-4257	2.10314	4.3743	1.5619	0.0354907	6.05906	-1.27303	-0.348272	0.810485	0.999117
hsa-miR-759	0.300448	3.64525	5.22896	3.08769	6.69315	2.52796	1.33797	0.264062	0.999117
hsa-miR-1288-5p	80.1196	52.9082	48.4188	69.1713	47.9793	-1.20351	-0.267244	0.7437	0.999117
hsa-miR-1245b-3p	4.45665	3.9577	8.28484	1.5261	10.2863	1.58459	0.664112	0.500722	0.999117
hsa-miR-10b-3p	0.100149	0.989424	0.135817	0.780795	0.0704542	-1.56717	-0.648161	0.66911	0.999117
hsa-miR-545-3p	1.35202	0.31245	2.10516	0.0709813	0.140908	-1.08881	-0.122756	0.94166	0.999117
hsa-miR-3065-3p	1.55232	2.44752	0.47536	0.177453	2.74771	-1.78456	-0.835569	0.571792	0.999117
hsa-miR-383-3p	2.70404	2.60375	2.64843	4.01045	5.77724	1.55552	0.637399	0.57101	0.999117
hsa-miR-922	7.91181	14.8934	7.33412	13.0961	12.8931	-1.02406	-0.0343063	0.969244	0.999117
hsa-miR-214-3p	728.938	781.437	521.062	602.383	2268.41	1.4971	0.582174	0.508446	0.999117
hsa-miR-4310	0.550822	0.31245	0.135817	0.177453	0.140908	-2.69201	-1.42869	0.333658	0.999117
hsa-miR-4691-3p	5.7586	11.6648	5.02523	14.0543	12.1886	1.19925	0.262127	0.770131	0.999117
hsa-miR-4690-3p	5.85875	6.35315	5.16105	8.97914	3.02953	-1.05606	-0.0786925	0.925501	0.999117
hsa-miR-5690	4.40658	2.75997	9.5751	2.87474	3.45225	1.4711	0.556894	0.59209	0.999117
hsa-miR-6736-3p	5.80867	1.09357	6.92667	3.90397	0.493179	1.09358	0.129052	0.918159	0.999117
hsa-miR-1207-3p	7.31091	6.0407	3.1917	7.77246	3.45225	-1.37047	-0.454672	0.591148	0.999117
hsa-miR-873-5p	1.50224	0.937349	0.271634	1.77453	7.6795	2.64107	1.40112	0.304127	0.999117
hsa-miR-4436a	5.80867	0.364525	0.950719	1.98748	12.3295	1.64451	0.717659	0.556315	0.999117
hsa-miR-4768-3p	5.50822	2.39545	4.61778	9.1211	5.56588	1.63606	0.710228	0.405016	0.999117
hsa-miR-4433a-3p	15.0725	19.3719	24.9903	38.8623	9.58177	1.42337	0.509312	0.566133	0.999117
hsa-miR-4742-5p	1.10164	1.6664	2.85216	2.09395	0.211363	1.24589	0.317182	0.823682	0.999117
hsa-miR-4269	0.150224	0.10415	0.0679085	1.24217	0.211363	3.98596	1.99493	0.203535	0.999117
hsa-miR-4514	2.50374	1.09357	3.73497	3.90397	1.62045	1.72357	0.7854	0.51998	0.999117
hsa-miR-4650-5p	0.300448	4.06185	5.02523	1.45512	9.15904	2.38145	1.25184	0.324149	0.999117
hsa-miR-3937	7.11061	1.71847	0.950719	4.1879	10.5681	1.18421	0.243921	0.830417	0.999117
hsa-miR-3155a	328.691	364.473	492.337	282.115	150.349	-1.1243	-0.169028	0.826842	0.999117
hsa-miR-211-3p	0.450673	0.885274	0.271634	1.77453	0.493179	1.31109	0.390769	0.797285	0.999117
hsa-miR-4270	1.60239	2.34337	1.42608	9.54699	6.41133	2.94225	1.55692	0.159508	0.999117
hsa-miR-3918	1.65247	3.7494	0.271634	4.9332	6.62269	1.45978	0.545751	0.661267	0.999117
hsa-miR-6798-5p	0.150224	0.2083	0.203726	0.816285	0.0704542	2.13591	1.09485	0.471135	0.999117
hsa-miR-6823-5p	11.417	16.9764	3.53124	15.7224	24.0249	1.01626	0.023269	0.979395	0.999117
hsa-miR-9900	10.2653	2.96827	6.17967	13.8059	11.2022	1.57248	0.653039	0.452645	0.999117
hsa-miR-125a-3p	20.781	28.2246	16.9092	12.9186	6.27042	-2.03366	-1.02408	0.166529	0.999117
hsa-miR-764	1.60239	0.572825	0.271634	4.01045	5.28406	2.92049	1.54621	0.244271	0.999117
hsa-miR-3934-5p	5.80867	3.07242	7.06249	4.32986	8.17268	1.45557	0.541582	0.547443	0.999117
hsa-miR-545-5p	1.10164	2.55167	0.611177	5.25262	5.49543	2.07407	1.05246	0.382596	0.999117
hsa-miR-936	6.81017	7.39464	15.0757	10.2923	31.6339	2.66782	1.41566	0.122062	0.999117
hsa-miR-199a-3p	15171.6	14955	17608.6	10241.1	14465.6	-1.06794	-0.0948344	0.890186	0.999117
hsa-miR-16-1-3p	0.500747	1.8747	1.08654	1.81002	8.80677	3.26371	1.70651	0.197015	0.999117
hsa-miR-455-3p	412.916	394.364	505.239	211.028	208.051	-1.31019	-0.389772	0.604542	0.999117
hsa-miR-1910-5p	5.5583	2.65582	2.10516	10.0084	0.352271	1.01619	0.0231764	0.984276	0.999117
hsa-miR-622	4.85725	0.2083	1.15444	3.30063	2.32499	-1.11771	-0.160548	0.908773	0.999117
hsa-miR-5190	0.350523	1.51017	0.611177	1.9165	0.0704542	-1.05292	-0.0743922	0.961979	0.999117
hsa-miR-148a-3p	312.166	182.314	290.784	128.476	72.7087	-1.50773	-0.592375	0.497379	0.999117
hsa-miR-5693	3.35501	6.19692	1.76562	6.4593	13.034	1.48224	0.567779	0.573626	0.999117
hsa-miR-194-3p	0.100149	1.6664	2.24098	1.31315	3.94543	2.80877	1.48994	0.274136	0.999117
hsa-miR-6733-3p	5.10762	11.3003	4.88941	3.30063	4.43861	-1.95976	-0.97068	0.262052	0.999117
hsa-miR-4302	3.90583	0.781124	1.01863	1.34865	8.80677	1.58214	0.661881	0.595288	0.999117
hsa-miR-935	2.25336	4.00977	1.90144	4.11692	2.4659	-1.08621	-0.119303	0.91783	0.999117
hsa-miR-584-3p	2.30344	3.59317	4.88941	3.65554	0.84545	1.06476	0.0905219	0.939588	0.999117
hsa-miR-4277	9.96487	7.96747	2.51262	6.42381	0.634088	-2.78277	-1.47652	0.13316	0.999117
hsa-miR-1-5p	0.100149	1.0415	1.69771	2.44886	0	2.41628	1.27279	0.443265	0.999117
hsa-miR-103b	1.65247	2.44752	0.407451	5.85596	3.3818	1.57503	0.655376	0.590125	0.999117
hsa-miR-6729-3p	2.65396	1.4581	0.679085	10.6117	3.24089	2.36126	1.23955	0.273393	0.999117
hsa-miR-5196-3p	7.96188	6.14485	2.98797	4.75575	11.8363	-1.08384	-0.116153	0.900482	0.999117
hsa-miR-4793-5p	17.4761	14.3727	15.0757	13.9123	8.03178	-1.28659	-0.363555	0.672644	0.999117
hsa-miR-6785-3p	3.55531	0.885274	2.44471	2.05846	0.986358	-1.20963	-0.27457	0.827154	0.999117
hsa-miR-490-5p	2239.69	3705.86	1969.14	1891.69	816.493	-1.90668	-0.931064	0.282141	0.999117
hsa-miR-10226	0.701046	1.30187	1.6298	1.59708	0.422725	1.23553	0.305125	0.837048	0.999117
hsa-miR-4528	0.100149	0.937349	2.03726	0	0.0704542	1.34117	0.423496	0.8043	0.999117
hsa-miR-4317	3.9559	2.7079	1.42608	8.09187	3.73407	1.33466	0.41647	0.693496	0.999117
hsa-miR-4289	34.5516	32.5989	10.5937	23.4948	7.18633	-2.43	-1.28096	0.118449	0.999117
hsa-miR-4729	1.75262	2.18715	2.30889	5.67851	0.0704542	1.36902	0.453148	0.736767	0.999117
hsa-miR-1250-3p	0.450673	0.2083	0.203726	0.851776	0	1.12002	0.16352	0.915515	0.999117
hsa-miR-3691-3p	17.6263	12.0814	8.42066	4.75575	31.4226	-1.00071	-0.00102701	0.999117	0.999117
hsa-miR-323b-3p	138.457	143.102	116.531	88.8331	42.8361	-1.70129	-0.766629	0.319476	0.999117
hsa-miR-6777-3p	2.80419	2.4996	2.24098	2.6618	0.281817	-1.51669	-0.60093	0.64683	0.999117
hsa-miR-181a-2-3p	1111.06	962.293	1121.85	503.684	330.782	-1.58977	-0.668814	0.428527	0.999117
hsa-miR-324-3p	26.9402	14.6851	38.8437	18.7036	37.4816	1.51927	0.603379	0.487904	0.999117
hsa-miR-9902	0	4.11392	0.0679085	8.7662	3.52271	2.00162	1.00117	0.497253	0.999117
hsa-miR-488-5p	0	0.10415	0	0.0354907	0	-2.44932	-1.29238	0.532296	0.999117
hsa-miR-4530	3.50523	5.36372	4.27824	4.36535	1.40908	-1.31215	-0.391934	0.727633	0.999117
hsa-miR-338-3p	2.45366	1.92677	1.69771	0.319416	2.53635	-1.46746	-0.553326	0.67497	0.999117
hsa-miR-6849-3p	8.61286	5.72825	9.16765	13.3445	10.4272	1.54039	0.623298	0.459832	0.999117
hsa-miR-4738-5p	2.60389	3.07242	0.0679085	6.0689	9.2295	1.8031	0.850479	0.472119	0.999117
hsa-miR-4267	4.9574	1.19772	0.203726	1.31315	5.14315	-1.38968	-0.474758	0.729605	0.999117
hsa-miR-665	33.5501	36.4525	46.6531	28.1441	11.484	-1.21688	-0.283192	0.73782	0.999117
hsa-miR-4645-5p	0.250374	1.30187	2.30889	0	0.281817	1.10412	0.142892	0.933426	0.999117
hsa-miR-7113-5p	6.20927	10.415	4.68569	10.1148	8.31359	-1.07286	-0.101466	0.912117	0.999117
hsa-miR-4685-5p	8.61286	6.97804	0.882811	4.61379	16.4863	-1.06503	-0.0908919	0.935109	0.999117
hsa-miR-4712-5p	10.4656	1.40602	10.4579	7.45304	12.5408	1.70703	0.77149	0.430144	0.999117
hsa-miR-1825	2.55381	15.7266	4.8215	17.7453	7.5386	1.1001	0.13764	0.886945	0.999117
hsa-miR-199a-5p	1151.22	1232.09	1728.48	854.083	319.862	-1.23172	-0.300677	0.729449	0.999117
hsa-miR-6884-3p	0.300448	0.989424	1.76562	0.248435	0.211363	1.13343	0.180698	0.910068	0.999117
hsa-miR-181a-3p	388.78	470.341	369.422	229.589	93.1404	-1.8618	-0.8967	0.259043	0.999117
hsa-miR-6872-3p	3.00448	1.61432	0.543268	4.08143	3.31135	1.15132	0.203285	0.878046	0.999117
hsa-miR-4716-5p	18.1771	8.43614	13.4459	1.81002	5.9886	-1.88388	-0.913709	0.347993	0.999117
hsa-miR-885-5p	1.30194	0.4166	0	1.1357	0.0704542	-2.04732	-1.03374	0.544974	0.999117
hsa-miR-186-3p	4.5568	3.02035	0.611177	4.75575	0.986358	-1.76168	-0.81695	0.503959	0.999117
hsa-miR-6814-5p	3.45516	17.2889	4.0066	61.8957	13.034	2.53774	1.34354	0.206016	0.999117
hsa-miR-662	12.4686	10.9357	15.551	16.7871	3.02953	1.00901	0.0129347	0.988844	0.999117
hsa-miR-4301	2.65396	8.01954	0.882811	3.76201	2.53635	-2.20638	-1.14168	0.32343	0.999117
hsa-miR-6840-3p	4.00598	3.90562	3.1917	8.05638	5.42497	1.41929	0.50517	0.617995	0.999117
hsa-miR-1915-3p	15.1726	8.59237	4.07451	7.2401	15.0067	-1.35628	-0.439654	0.621602	0.999117
hsa-miR-6793-3p	3.15471	1.97885	0.950719	1.20668	8.4545	1.37107	0.455298	0.706508	0.999117
hsa-miR-4286	48.0217	34.6299	81.8977	59.4824	138.442	2.25547	1.17343	0.141082	0.999117
hsa-miR-361-3p	2.05306	7.81124	2.24098	3.76201	6.27042	-1.20629	-0.270573	0.799954	0.999117
hsa-miR-6840-5p	29.6943	17.7576	8.7602	18.7036	6.05906	-2.11363	-1.07972	0.169803	0.999117
hsa-miR-4707-5p	851.721	771.699	515.358	525.546	438.577	-1.64539	-0.71843	0.373138	0.999117
hsa-miR-5587-3p	20.781	29.9952	18.6069	14.5157	9.93404	-1.76743	-0.821655	0.291887	0.999117
hsa-miR-6887-3p	32.8991	19.2157	12.1556	27.6472	14.7249	-1.42928	-0.515286	0.525686	0.999117
hsa-miR-6795-3p	14.1712	8.27992	3.39543	21.9332	15.0772	1.20145	0.264771	0.776299	0.999117
hsa-miR-6801-3p	4.25635	6.92597	0.47536	9.33405	13.809	1.40792	0.493564	0.661024	0.999117
hsa-miR-331-3p	24.6368	14.6331	31.7133	14.6931	10.2159	-1.0411	-0.0581056	0.942494	0.999117
hsa-miR-3127-3p	2.30344	6.71767	3.12379	5.50105	0.352271	-1.49809	-0.58312	0.629698	0.999117
hsa-miR-4740-3p	8.76308	8.54029	0.407451	16.2902	12.8931	1.14087	0.190133	0.855487	0.999117
hsa-miR-4258	7.61136	13.5916	4.48196	17.5324	9.29995	-1.01198	-0.0171802	0.985009	0.999117
hsa-miR-7108-3p	18.6779	2.7079	7.06249	9.05012	20.8544	1.15131	0.203277	0.836504	0.999117
hsa-miR-1471	23.1345	32.7031	32.9356	23.2109	41.3566	1.16156	0.216062	0.78705	0.999117
hsa-miR-10398-3p	47.3707	73.3736	25.6694	46.4573	156.972	1.26465	0.338743	0.694798	0.999117
hsa-miR-1247-3p	3.00448	1.92677	2.51262	1.41963	0.774996	-1.57591	-0.656187	0.598764	0.999117
hsa-miR-4783-3p	3.30493	6.30107	2.3768	3.90397	1.26818	-1.87544	-0.907226	0.425291	0.999117
hsa-miR-3162-3p	2.55381	5.57202	7.60575	5.60753	10.6386	1.94777	0.961825	0.320118	0.999117
hsa-miR-454-5p	15.9738	3.38487	6.11177	6.49479	17.5431	1.03669	0.0519904	0.954756	0.999117
hsa-miR-1470	11.3169	10.7274	7.74157	36.8748	17.9658	1.89546	0.922547	0.256816	0.999117
hsa-miR-4667-3p	15.9738	20.3613	14.6003	15.8288	14.3022	-1.20999	-0.27499	0.707163	0.999117
hsa-miR-6803-3p	7.71151	6.82182	6.31549	5.99792	10.8499	1.05378	0.0755795	0.937332	0.999117
hsa-miR-4655-3p	13.2197	11.3523	20.033	23.0689	19.1635	1.70498	0.769756	0.323895	0.999117
hsa-miR-2276-5p	8.76308	5.25957	5.63641	8.44678	5.28406	-1.07592	-0.105573	0.910897	0.999117
hsa-miR-345-3p	15.7735	12.2376	8.82811	21.6848	3.73407	-1.22294	-0.290354	0.75178	0.999117
hsa-miR-4732-3p	9.81465	5.31165	7.26621	13.1315	11.6249	1.41467	0.500463	0.562078	0.999117
hsa-miR-125a-5p	25430.7	9294.5	14677.8	21311.9	25865.8	1.18752	0.247955	0.733554	0.999117
hsa-miR-6752-3p	16.775	15.31	9.37137	13.6284	26.7726	1.03275	0.0464973	0.950719	0.999117
hsa-miR-4308	5.50822	7.18634	9.43928	8.12736	18.3885	1.88039	0.911031	0.282848	0.999117
hsa-miR-4292	188.031	71.7593	128.551	150.267	93.3518	-1.0469	-0.0661292	0.933476	0.999117
hsa-miR-339-5p	27.9417	18.747	19.6256	19.7328	15.1476	-1.28219	-0.358607	0.623958	0.999117
hsa-miR-146b-3p	304.505	141.54	238.223	252.552	106.245	-1.12055	-0.164212	0.84185	0.999117
hsa-miR-5088-3p	2.90434	3.02035	2.30889	6.03341	3.02953	1.30032	0.378862	0.734602	0.999117
hsa-miR-4780	2.40359	3.69732	3.93869	4.86222	0.704542	1.0453	0.0639234	0.955965	0.999117
hsa-miR-6780b-3p	33.2496	57.2304	42.1712	24.1691	5.9886	-1.87602	-0.907676	0.282108	0.999117
hsa-miR-6832-3p	8.71301	3.1245	0.339543	6.42381	2.18408	-1.9705	-0.978558	0.3917	0.999117
hsa-miR-6716-3p	4.45665	3.5411	7.9453	11.1086	0.986358	1.67351	0.742879	0.423343	0.999117
hsa-miR-4671-5p	0.701046	10.6233	3.32752	0.177453	7.89087	-1.49305	-0.578258	0.64723	0.999117
hsa-miR-615-3p	20.8812	10.8837	6.17967	30.0251	28.8862	1.36668	0.450676	0.576912	0.999117
hsa-miR-6886-5p	18.6278	27.5477	7.9453	25.3403	15.5704	-1.4137	-0.499474	0.510027	0.999117
hsa-miR-4485-5p	12.4686	37.7023	7.87739	34.071	40.4407	1.09505	0.130995	0.882026	0.999117
hsa-miR-1203	5.00747	0.52075	3.12379	4.9332	10.0749	2.1804	1.1246	0.330115	0.999117
hsa-miR-6850-3p	13.6203	23.7462	22.3419	10.2568	48.6134	1.44725	0.533312	0.569148	0.999117
hsa-miR-6784-5p	37.7063	43.8471	44.9554	11.9249	37.1998	-1.30187	-0.380588	0.651409	0.999117
hsa-miR-671-3p	25.8886	14.7893	16.6376	5.21713	11.484	-1.83607	-0.876624	0.324911	0.999117
hsa-miR-3678-5p	0.100149	0.10415	0	2.20042	0.140908	7.3318	2.87417	0.117236	0.999117
hsa-miR-340-3p	127.941	156.381	194.83	107.288	36.2839	-1.26027	-0.333732	0.692378	0.999117
hsa-miR-1973	0.400598	0.31245	0.271634	0.319416	0.0704542	-1.4501	-0.536157	0.717954	0.999117
hsa-miR-132-5p	1752.22	1180.64	1824.97	732.918	747.448	-1.331	-0.412505	0.626263	0.999117
hsa-miR-5009-3p	0.600897	2.13507	3.66706	3.01671	3.94543	2.57818	1.36635	0.273052	0.999117
hsa-miR-6761-3p	3.65546	0.260375	1.08654	2.37787	5.70679	1.55599	0.637834	0.630729	0.999117
hsa-miR-6072	1.75262	0.989424	1.01863	0.106472	0.0704542	-3.49728	-1.80623	0.25351	0.999117
hsa-miR-5193	27.2407	18.07	18.1316	30.8769	17.3317	-1.02123	-0.0303087	0.971668	0.999117
hsa-miR-660-3p	12.6188	10.3629	12.2235	10.7537	19.1635	1.21605	0.282197	0.746989	0.999117
hsa-miR-10401-3p	2.40359	4.94712	5.02523	2.59082	7.04542	1.31942	0.3999	0.699537	0.999117
hsa-miR-3183	6.55979	5.57202	4.07451	8.34031	0.140908	-1.44428	-0.530348	0.654969	0.999117
hsa-miR-877-3p	12.3685	7.86332	6.79085	7.48853	6.97496	-1.42367	-0.509612	0.581212	0.999117
hsa-miR-3140-5p	0.100149	1.35395	1.35817	1.59708	0.140908	1.42751	0.513506	0.74472	0.999117
hsa-miR-4324	147.37	51.7625	63.4945	120.704	102.229	-1.04267	-0.0602781	0.94023	0.999117
hsa-miR-544b	0.450673	4.32222	5.36477	0.496869	14.8658	2.88615	1.52915	0.238305	0.999117
hsa-miR-4722-3p	24.136	17.2889	9.5751	40.069	85.8132	2.17926	1.12384	0.208274	0.999117
hsa-miR-6747-3p	11.2668	9.58179	15.0078	9.58248	12.9636	1.18966	0.250546	0.772246	0.999117
hsa-miR-3193	3.70553	1.82262	0.611177	2.94573	1.47954	-1.61443	-0.691027	0.592242	0.999117
hsa-miR-370-3p	331.495	216.111	275.844	228.595	30.718	-1.5348	-0.61805	0.488612	0.999117
hsa-miR-3690	1.85277	2.65582	2.03726	8.69521	7.96132	2.76785	1.46876	0.161046	0.999117
hsa-miR-4254	5.85875	9.00897	4.34614	3.65554	6.69315	-1.53283	-0.616199	0.472174	0.999117
hsa-miR-221-5p	20.08	11.3003	44.3443	9.65346	12.6818	1.41507	0.500878	0.5403	0.999117
hsa-miR-939-3p	8.71301	3.43695	6.58713	9.75993	11.0613	1.50315	0.587986	0.549624	0.999117
hsa-miR-6742-3p	47.9716	90.8187	86.6513	46.4218	53.052	-1.11902	-0.162234	0.84462	0.999117
hsa-miR-486-5p	5.7586	3.3328	2.58052	0.709813	0.352271	-3.76267	-1.91176	0.14172	0.999117
hsa-miR-6748-3p	3.9559	4.73882	3.53124	0.816285	1.19772	-2.38001	-1.25097	0.307558	0.999117
hsa-miR-4421	2125.72	1889.75	679.696	1522.23	595.69	-2.15282	-1.10623	0.182011	0.999117
hsa-miR-1914-5p	3.05456	1.19772	0.407451	3.93946	0.281817	-1.3582	-0.441701	0.751729	0.999117
hsa-miR-1266-3p	3.60538	2.13507	2.44471	2.16493	6.62269	1.29297	0.370692	0.747421	0.999117
hsa-miR-205-5p	1.05157	2.23922	0.543268	0.0354907	2.11363	-1.85254	-0.889503	0.575142	0.999117
hsa-miR-6734-3p	16.775	13.5395	19.6256	20.1942	10.1454	1.10162	0.139621	0.858792	0.999117
hsa-miR-3667-3p	19.9798	10.8837	25.1262	22.1107	16.2749	1.37202	0.456305	0.556906	0.999117
hsa-miR-320a-5p	0.851271	0.729049	3.05588	0.283925	3.52271	2.85255	1.51225	0.315579	0.999117
hsa-miR-1248	1.35202	1.6664	0.679085	6.99166	0.986358	1.92525	0.945042	0.484811	0.999117
hsa-miR-10397-5p	12.4686	3.43695	5.09314	5.64302	8.73632	-1.22729	-0.29548	0.741971	0.999117
hsa-miR-6841-3p	0.150224	0.2083	0.0679085	2.23591	0.281817	4.76796	2.25337	0.182741	0.999117
hsa-miR-1915-5p	9.96487	3.28072	6.04386	5.96243	34.9453	2.35905	1.2382	0.219584	0.999117
hsa-miR-212-5p	62.0426	24.4232	70.8286	28.357	33.043	1.01897	0.0271119	0.974397	0.999117
hsa-miR-3189-3p	5.00747	3.80147	6.24758	3.33612	0	-1.37771	-0.462269	0.730462	0.999117
hsa-miR-3121-5p	6.96039	1.6664	2.51262	5.67851	8.17268	1.26348	0.337408	0.748917	0.999117
hsa-miR-196b-3p	1.65247	3.02035	0.543268	4.40084	2.67726	1.09651	0.132922	0.920112	0.999117
hsa-miR-551a	0.550822	0.885274	2.24098	0.283925	6.62269	4.1955	2.06884	0.13091	0.999117
hsa-miR-1307-5p	9.7145	19.3719	8.82811	12.3153	20.6431	-1.04497	-0.0634644	0.943558	0.999117
hsa-miR-375-5p	3.50523	4.21807	6.45131	8.62423	4.57952	1.71826	0.780946	0.380328	0.999117
hsa-miR-3131	7.41106	11.6648	2.71634	1.31315	10.0045	-2.04671	-1.03331	0.312954	0.999117
hsa-miR-151a-5p	3551.55	4663.26	5267.87	2480.23	2106.09	-1.25046	-0.322463	0.716601	0.999117
hsa-miR-106b-3p	7.26084	12.1855	4.7536	7.94991	3.52271	-1.77782	-0.830111	0.358328	0.999117
hsa-miR-6767-5p	1.60239	8.27992	1.01863	3.37161	16.134	1.38257	0.467352	0.671894	0.999117
hsa-miR-1249-3p	9.21375	3.85355	4.88941	1.59708	2.81817	-2.12354	-1.08647	0.288752	0.999117
hsa-miR-1281	21.0314	14.6851	12.0877	6.95617	2.11363	-2.53032	-1.33932	0.152048	0.999117
hsa-miR-6078	4.1562	4.42637	2.85216	5.46556	2.18408	-1.20159	-0.26494	0.806502	0.999117
hsa-miR-6880-3p	3.15471	2.65582	3.46333	1.49061	1.47954	-1.37526	-0.459703	0.709081	0.999117
hsa-miR-579-5p	34.9021	29.162	10.3221	42.6598	39.8771	-1.03425	-0.0485857	0.954768	0.999117
hsa-miR-6812-3p	4.20628	0.937349	0.271634	6.31734	3.3818	1.29566	0.373688	0.768116	0.999117
hsa-miR-6825-3p	1.15172	3.07242	1.35817	3.51358	5.63633	1.65654	0.728174	0.528261	0.999117
hsa-miR-10392-5p	1.70254	4.166	1.49399	2.34238	13.5977	1.97412	0.981212	0.39356	0.999117
hsa-miR-4315	9.01345	9.32142	7.67366	18.3842	13.034	1.42774	0.513732	0.570574	0.999117
hsa-miR-6125	73.8102	47.0237	61.6609	82.1964	206.994	1.93522	0.9525	0.246905	0.999117
hsa-miR-5091	0.200299	3.28072	0.543268	0.390397	9.44086	1.97914	0.984877	0.503749	0.999117
hsa-miR-5739	6.05904	2.86412	3.05588	10.4697	11.2727	1.85328	0.890079	0.353015	0.999117
hsa-miR-127-3p	81678.1	80570.4	110691	47067.1	33456.9	-1.27277	-0.347976	0.643287	0.999117
hsa-miR-105-3p	24.086	50.4606	16.7055	21.4364	36.5657	-1.49751	-0.582563	0.46729	0.999117
hsa-miR-4304	0.250374	1.14565	0.47536	0.141963	0.211363	-2.60054	-1.37881	0.333475	0.999117
hsa-miR-6075	12.719	5.36372	1.69771	6.28185	28.393	1.33957	0.421775	0.678426	0.999117
hsa-miR-10392-3p	57.3857	21.4549	9.37137	18.0293	22.4749	-2.37024	-1.24503	0.172825	0.999117
hsa-miR-1908-3p	12.4686	10.3629	11.5444	4.15241	11.0613	-1.28719	-0.364228	0.670452	0.999117
hsa-miR-1234-3p	7.26084	4.63467	0.543268	3.62005	5.42497	-1.85824	-0.89394	0.415916	0.999117
hsa-miR-4285	2.00299	4.06185	1.5619	3.69103	4.36816	1.06125	0.0857647	0.940325	0.999117
hsa-miR-6741-3p	45.9185	159.297	16.6376	79.4281	39.1021	-2.27594	-1.18646	0.178013	0.999117
hsa-miR-11400	14.1211	23.9545	11.6124	15.5449	12.1181	-1.44756	-0.533621	0.502388	0.999117
hsa-miR-6746-5p	6.30942	6.30107	1.90144	8.26933	28.1817	2.02499	1.01791	0.318591	0.999117
hsa-miR-7112-5p	3.45516	3.5411	0.339543	3.4071	0.140908	-2.64851	-1.40518	0.302431	0.999117
hsa-miR-6749-5p	9.46413	4.5826	2.51262	19.7683	33.6066	2.65053	1.40628	0.13202	0.999117
hsa-miR-6499-5p	2.45366	3.59317	2.03726	8.94365	7.6795	2.06226	1.04422	0.261632	0.999117
hsa-miR-6777-5p	10.065	11.2482	10.5937	10.7892	14.8658	1.12552	0.170598	0.838506	0.999117
hsa-miR-542-5p	200.95	236.524	302.736	109.844	30.6476	-1.48056	-0.566142	0.525765	0.999117
hsa-miR-5090	1.35202	0.052075	0.203726	1.20668	4.57952	2.81635	1.49383	0.355523	0.999117
hsa-miR-4508	5.50822	5.88447	9.43928	2.30689	16.8385	1.66707	0.737317	0.478804	0.999117
hsa-miR-4787-5p	1.20179	1.2498	3.87079	1.9165	0.352271	1.66547	0.735929	0.58961	0.999117
hsa-miR-137-5p	1.65247	2.18715	1.83353	2.23591	12.4704	2.85665	1.51432	0.167082	0.999117
hsa-miR-125b-1-3p	515.019	446.126	449.554	288.468	201.499	-1.53456	-0.617823	0.403363	0.999117
hsa-miR-4746-5p	10.7661	9.37349	12.5631	24.595	22.9681	1.99388	0.995577	0.183185	0.999117
hsa-miR-598-5p	0.150224	1.40602	1.01863	1.98748	0.140908	1.36243	0.446183	0.771166	0.999117
hsa-miR-1250-5p	0.150224	2.4996	0.339543	0.141963	3.09998	-1.11664	-0.159161	0.917821	0.999117
hsa-miR-6786-5p	0.851271	4.3743	0.814902	2.44886	1.12727	-1.75652	-0.812718	0.543102	0.999117
hsa-miR-101-2-5p	0.550822	0.10415	1.6298	0.0354907	0.281817	1.93097	0.949324	0.54139	0.999117
hsa-miR-6070	146.268	118.575	182.063	69.7037	99.8336	-1.1303	-0.176703	0.821524	0.999117
hsa-miR-126-3p	270.103	209.498	291.192	179.299	74.8223	-1.31922	-0.39969	0.640973	0.999117
hsa-miR-6506-3p	3.00448	2.083	6.24758	0.212944	0	-1.18329	-0.2428	0.872875	0.999117
hsa-miR-1181	3.65546	10.3108	1.42608	9.72444	9.86358	1.00447	0.0064306	0.995014	0.999117
hsa-miR-4536-3p	0.100149	1.2498	0.746994	5.67851	0.211363	3.27769	1.71268	0.238941	0.999117
hsa-miR-1204	40.1099	35.2547	41.4242	62.712	156.831	2.30769	1.20645	0.146015	0.999117
hsa-miR-6774-3p	28.3423	15.1538	28.182	20.762	28.0408	1.17755	0.235793	0.785606	0.999117
hsa-miR-187-3p	8.56278	3.3328	3.05588	3.51358	3.31135	-1.80178	-0.849425	0.378687	0.999117
hsa-miR-1306-3p	4.9574	4.32222	4.68569	8.80169	10.9909	1.75878	0.814572	0.329619	0.999117
hsa-miR-5707	3.70553	0.52075	1.08654	0.283925	4.36816	-1.11185	-0.152959	0.913209	0.999117
hsa-miR-1282	4.65695	1.82262	0.746994	7.31108	7.5386	1.60528	0.682827	0.547596	0.999117
hsa-miR-4744	2.75411	2.44752	2.30889	6.49479	4.22725	1.68811	0.755411	0.487443	0.999117
hsa-miR-190b-3p	1.45217	0.885274	0.271634	1.41963	3.66362	1.51782	0.602	0.668787	0.999117
hsa-miR-4521	170.354	135.499	202.503	245.063	167.258	1.34081	0.42311	0.613704	0.999117
hsa-miR-4735-5p	0.550822	1.92677	0.135817	2.23591	0	-1.53833	-0.621363	0.711425	0.999117
hsa-miR-1283	0.0500747	0.10415	0	0.0354907	0	-3.52708	-1.81848	0.359449	0.999117
hsa-miR-139-5p	16.4746	17.4451	12.9026	5.85596	29.3794	-1.05904	-0.0827537	0.917132	0.999117
hsa-miR-138-1-3p	55.633	14.4248	19.1502	29.1023	24.5181	-1.44341	-0.529481	0.525798	0.999117
hsa-miR-6508-5p	1.70254	0.10415	0.0679085	1.24217	0	-2.00777	-1.00559	0.560975	0.999117
hsa-miR-4305	1.00149	0.052075	1.76562	0.0354907	1.90226	2.30735	1.20624	0.481947	0.999117
hsa-miR-520g-5p	1.10164	12.6542	10.5258	13.1315	21.6294	2.19354	1.13326	0.264124	0.999117
hsa-miR-628-3p	16.1241	4.73882	20.5084	5.74949	17.3317	1.39012	0.475209	0.6207	0.999117
hsa-miR-325	33.8505	217.309	17.1809	46.9542	190.931	-1.47712	-0.562784	0.554328	0.999117
hsa-miR-554	3.25486	0.31245	6.11177	5.11066	0.0704542	2.10713	1.07528	0.441873	0.999117
hsa-miR-6080	0.0500747	0.156225	0.203726	1.49061	0	5.32822	2.41365	0.155241	0.999117
hsa-miR-1284	14.722	14.6851	24.2433	5.78498	4.01589	-1.29707	-0.37526	0.689398	0.999117
hsa-miR-6731-3p	0.600897	0.729049	0.746994	3.7975	0.281817	2.44246	1.28833	0.398023	0.999117
hsa-miR-26a-1-3p	16.775	14.4768	15.1436	11.8539	4.43861	-1.48906	-0.574402	0.539476	0.999117
hsa-miR-138-2-3p	2.40359	2.4996	0.679085	1.95199	0.0704542	-2.64451	-1.403	0.328805	0.999117
hsa-miR-371b-5p	7.51121	5.57202	0.339543	10.1148	5.63633	-1.21646	-0.282684	0.796783	0.999117
hsa-miR-371a-5p	1.90284	1.19772	1.69771	1.81002	3.3818	1.45327	0.539301	0.674919	0.999117
hsa-miR-342-3p	291.135	414.985	495.189	173.833	147.249	-1.29766	-0.375914	0.642996	0.999117
hsa-miR-6511a-3p	4.90733	4.47845	10.5258	5.78498	7.11587	1.64762	0.720381	0.446731	0.999117
hsa-miR-6784-3p	4.9574	7.70709	0.543268	3.26514	13.8795	-1.07538	-0.104843	0.924066	0.999117
hsa-miR-1304-3p	26.4895	30.8805	34.8371	21.3299	18.1067	-1.15975	-0.213817	0.811811	0.999117
hsa-miR-4330	5.10762	13.5395	9.71092	8.97914	36.918	1.98559	0.989565	0.26599	0.999117
hsa-miR-6787-3p	1.95292	4.00977	3.53124	4.72026	4.50907	1.43597	0.522027	0.65505	0.999117
hsa-miR-3664-3p	9.61435	35.463	3.53124	21.2589	37.5521	-1.08458	-0.117135	0.905899	0.999117
hsa-miR-1266-5p	0.851271	4.9992	1.69771	6.67225	8.80677	1.95682	0.968512	0.396892	0.999117
hsa-miR-4264	12.5688	7.86332	15.9585	8.19834	12.1886	1.18	0.23879	0.784572	0.999117
hsa-miR-6870-3p	2.00299	0.676975	2.03726	2.6618	0	1.17264	0.229765	0.880928	0.999117
hsa-miR-6758-3p	1.75262	0.4166	0.814902	0.603341	0	-2.25728	-1.17458	0.467064	0.999117
hsa-miR-519d-5p	1.25187	7.13427	0.814902	3.86848	5.56588	-1.22603	-0.293991	0.800337	0.999117
hsa-miR-5695	6.86024	9.26934	6.79085	20.3007	14.6545	1.73008	0.790839	0.392645	0.999117
hsa-miR-766-3p	15.0224	12.498	15.8227	7.45304	17.4022	-1.01972	-0.0281698	0.974212	0.999117
hsa-miR-136-5p	67.5008	34.6299	81.626	20.8685	11.7658	-1.34109	-0.42341	0.646565	0.999117
hsa-miR-150-5p	0.550822	2.2913	2.64843	0.106472	1.54999	1.00123	0.00177668	0.999058	0.999117
hsa-miR-532-3p	59.0381	29.9431	68.7234	38.117	74.2587	1.35565	0.438985	0.575251	0.999117
hsa-miR-2116-3p	3.50523	4.32222	2.85216	5.21713	0.211363	-1.40859	-0.494247	0.690128	0.999117
hsa-miR-4469	9.86473	14.3727	11.0012	18.9875	8.80677	1.07285	0.10145	0.909021	0.999117
hsa-miR-7113-3p	2.15321	6.82182	4.0066	7.94991	0.774996	-1.05239	-0.0736669	0.947568	0.999117
hsa-miR-4287	13.8707	14.9976	13.6496	15.5094	21.0658	1.15632	0.209536	0.777522	0.999117
hsa-miR-3605-3p	35.5531	53.6372	61.3893	59.6243	34.3816	1.16236	0.217059	0.780295	0.999117
hsa-miR-1976	1.90284	5.88447	6.11177	8.90816	7.18633	1.90596	0.930519	0.332516	0.999117
hsa-miR-6814-3p	1.45217	0.2083	1.90144	2.30689	0.352271	1.83424	0.875185	0.560986	0.999117
hsa-miR-3917	45.1173	43.6388	67.0257	24.8435	5.0727	-1.37343	-0.457781	0.623857	0.999117
hsa-miR-1307-3p	259.838	279.538	353.328	159.637	68.3405	-1.39183	-0.476987	0.577024	0.999117
hsa-miR-4638-5p	2.95441	4.21807	7.1983	3.90397	4.2977	1.41917	0.505052	0.622707	0.999117
hsa-miR-8088	2.55381	0.572825	0.203726	6.38832	4.50907	2.36514	1.24192	0.31752	0.999117
hsa-miR-520f-5p	3.35501	1.61432	1.08654	3.30063	0.140908	-1.62243	-0.698152	0.6099	0.999117
hsa-miR-519a-2-5p	2.15321	0	0.746994	0.0354907	0	-4.09826	-2.03501	0.253592	0.999117
hsa-miR-517-5p	6.25934	8.38407	1.15444	5.64302	20.5726	1.24469	0.315791	0.752344	0.999117
hsa-miR-1251-5p	3.50523	6.50937	5.70432	2.98122	15.4999	1.60432	0.68196	0.486806	0.999117
hsa-miR-3059-3p	2.55381	1.09357	0.950719	0.567851	0.634088	-2.59193	-1.37402	0.353297	0.999117
hsa-miR-12125	16.8251	5.4158	11.4765	10.2213	11.2022	-1.01502	-0.021504	0.980644	0.999117
hsa-miR-6845-3p	6.30942	9.42557	3.87079	6.24636	7.32723	-1.34935	-0.432264	0.646635	0.999117
hsa-miR-3615	16.6248	7.08219	13.5817	16.3967	22.8976	1.4852	0.570661	0.488879	0.999117
hsa-miR-7110-3p	13.5703	10.9357	5.90804	15.4384	42.8361	1.74464	0.80293	0.350682	0.999117
hsa-miR-6817-3p	0.701046	9.63387	5.09314	6.38832	11.7658	1.49849	0.583507	0.548489	0.999117
hsa-miR-146a-3p	5.70852	9.79009	5.02523	18.1357	0.211363	1.00713	0.0102464	0.99272	0.999117
hsa-miR-301a-5p	16.3244	7.75917	5.50059	6.0689	3.45225	-2.39058	-1.25736	0.1819	0.999117
hsa-miR-3921	10.065	4.73882	4.27824	9.86641	13.7386	1.25524	0.327967	0.711364	0.999117
hsa-miR-6728-3p	6.35949	4.89505	4.8215	8.12736	0.493179	-1.25075	-0.322789	0.779102	0.999117
hsa-miR-518c-5p	7.21076	5.8324	10.7295	10.4697	20.784	2.13704	1.09561	0.209177	0.999117
hsa-miR-326	9.5142	7.49879	7.1983	5.14615	2.25453	-1.74417	-0.802541	0.330921	0.999117
hsa-miR-6764-3p	15.0224	11.2482	6.31549	14.1608	23.5317	1.11621	0.158604	0.861167	0.999117
hsa-miR-6515-3p	4.3565	1.6664	1.49399	2.34238	0	-2.33227	-1.22173	0.392815	0.999117
hsa-miR-1236-3p	9.06353	2.23922	8.08111	13.2025	16.5567	2.22947	1.1567	0.198381	0.999117
hsa-miR-130b-5p	201.3	284.85	300.971	226.572	59.111	-1.24296	-0.313776	0.713356	0.999117
hsa-miR-130a-5p	12.3685	10.4671	9.09974	4.22339	10.2159	-1.46668	-0.552555	0.516026	0.999117
hsa-miR-4766-5p	3.40508	2.083	1.76562	1.41963	4.22725	-1.12605	-0.171273	0.889676	0.999117
hsa-miR-4427	2.20329	2.81205	0.203726	2.80376	0.140908	-2.33519	-1.22354	0.38167	0.999117
hsa-miR-5187-3p	3.15471	3.7494	4.7536	3.47809	0.211363	-1.22377	-0.29133	0.817356	0.999117
hsa-miR-4680-3p	8.36248	1.30187	1.29026	4.96869	0	-2.30211	-1.20296	0.381806	0.999117
hsa-miR-6730-3p	5.20777	2.7079	2.3768	3.01671	5.49543	-1.09716	-0.133768	0.904975	0.999117
hsa-miR-3660	1.65247	2.55167	1.29026	2.55533	0.352271	-1.46747	-0.55333	0.675377	0.999117
hsa-miR-6719-3p	3.70553	0.937349	0.407451	5.57204	0.0704542	-1.1431	-0.192953	0.898405	0.999117
hsa-miR-4750-3p	3.05456	4.32222	0.679085	5.57204	12.9636	1.73412	0.794206	0.414465	0.999117
hsa-miR-345-5p	304.655	202.363	219.073	201.126	66.6496	-1.56195	-0.643347	0.451789	0.999117
hsa-miR-4251	20.08	11.4044	6.79085	14.7996	81.0223	2.17141	1.11863	0.241071	0.999117
hsa-miR-4329	34.7519	43.795	39.4548	18.3842	22.2635	-1.47326	-0.559008	0.4882	0.999117
hsa-miR-6761-5p	6.25934	5.2075	1.6298	3.76201	3.59316	-1.88769	-0.916625	0.364941	0.999117
hsa-miR-1199-5p	1.80269	5.2075	3.66706	7.94991	10.2159	2.07643	1.05411	0.257852	0.999117
hsa-miR-4649-3p	20.8812	77.1751	5.77222	27.6117	271.249	2.07085	1.05022	0.335966	0.999117
hsa-miR-4682	1.20179	4.3743	2.51262	1.38414	0.0704542	-2.10008	-1.07044	0.438742	0.999117
hsa-miR-3151-3p	35.6031	23.9545	63.5624	18.3132	15.7113	1.09173	0.126616	0.882265	0.999117
hsa-miR-4502	35.3528	20.3613	14.1929	39.8915	71.5814	1.50335	0.588178	0.496649	0.999117
hsa-miR-3920	1.60239	0.10415	0.0679085	0.177453	2.4659	1.04964	0.0698941	0.967705	0.999117
hsa-miR-29a-5p	28.9933	24.2149	25.3978	18.7036	5.0727	-1.62195	-0.697729	0.378539	0.999117
hsa-miR-4772-3p	2.65396	0.781124	1.76562	5.60753	0.140908	1.46465	0.550555	0.704676	0.999117
hsa-miR-2276-3p	4.40658	0.156225	1.5619	3.15867	0.0704542	-1.42046	-0.506355	0.727964	0.999117
hsa-miR-3130-3p	1.70254	0.937349	0.611177	1.31315	2.88862	1.20444	0.268359	0.852576	0.999117
hsa-miR-4793-3p	2.00299	2.13507	4.68569	2.37787	0.281817	1.18301	0.242457	0.854088	0.999117
hsa-miR-3158-5p	1.60239	1.56225	1.96935	2.55533	2.04317	1.43363	0.519676	0.681962	0.999117
hsa-miR-1184	0.95142	2.75997	2.85216	2.51984	11.2727	2.97455	1.57267	0.145263	0.999117
hsa-miR-10394-5p	2.25336	1.77055	1.76562	0.496869	6.83405	1.49612	0.581227	0.651858	0.999117
hsa-miR-17-3p	18.0269	6.92597	15.9585	15.403	2.74771	-1.09626	-0.132592	0.887696	0.999117
hsa-miR-20a-3p	4.80718	0.052075	2.17307	0	0	-3.34595	-1.74242	0.341731	0.999117
hsa-miR-4769-3p	5.10762	4.166	5.29686	7.45304	1.19772	1.00804	0.0115586	0.99129	0.999117
hsa-miR-1913	73.8603	29.6827	45.1592	45.3571	30.4362	-1.28366	-0.360269	0.669412	0.999117
hsa-miR-18a-3p	28.8431	28.0163	14.6003	17.3904	15.2181	-1.77364	-0.826709	0.244651	0.999117
hsa-miR-191-3p	60.8909	37.4419	43.3935	33.0063	18.7408	-1.54989	-0.632161	0.456329	0.999117
hsa-miR-4734	0.250374	5.2075	2.58052	6.0689	9.29995	2.19014	1.13102	0.341773	0.999117
hsa-miR-767-3p	2.10314	1.19772	2.24098	1.1357	0.281817	-1.35307	-0.436237	0.76475	0.999117
hsa-miR-93-3p	5.70852	3.07242	4.54987	2.69729	0.281817	-1.74587	-0.803945	0.514402	0.999117
hsa-miR-3692-5p	1.60239	2.13507	4.8215	10.2213	0.563633	2.78753	1.47899	0.169918	0.999117
hsa-miR-875-3p	12.6689	12.1855	10.3221	12.9186	12.3999	-1.02998	-0.0426192	0.961335	0.999117
hsa-miR-4638-3p	0.650972	0.10415	0.0679085	2.94573	0.0704542	2.72082	1.44404	0.386392	0.999117
hsa-miR-378a-3p	125.387	200.541	337.166	221.994	102.581	1.35357	0.436769	0.61087	0.999117
hsa-miR-3128	1.25187	0.31245	1.5619	2.2714	0.140908	1.70173	0.766999	0.605183	0.999117
hsa-miR-6868-5p	2.00299	6.50937	0.339543	5.85596	0.352271	-1.93114	-0.949449	0.470207	0.999117
hsa-miR-4720-5p	17.426	24.8918	1.22235	16.1837	64.2542	1.28609	0.362988	0.731886	0.999117
hsa-miR-3190-5p	11.7175	12.8104	4.27824	11.7119	11.9068	-1.31537	-0.395471	0.65519	0.999117
hsa-miR-3176	13.8707	10.4671	13.378	12.5282	26.843	1.44088	0.52695	0.515203	0.999117
hsa-miR-4794	6.10912	3.90562	3.53124	3.15867	0.0704542	-2.21258	-1.14573	0.347707	0.999117
hsa-miR-149-5p	2491.12	2705.92	4818.86	3401	2034.79	1.31545	0.395554	0.649567	0.999117
hsa-miR-3064-5p	9.01345	6.30107	6.3834	7.94991	18.3885	1.42049	0.506392	0.558778	0.999117
hsa-miR-204-3p	86.9798	43.0139	30.8305	34.355	16.0636	-2.39706	-1.26127	0.13246	0.999117
hsa-miR-3192-5p	3.75561	4.53052	1.29026	2.37787	0.140908	-3.19733	-1.67687	0.218042	0.999117
hsa-miR-619-5p	10.7661	1.35395	7.67366	6.28185	8.73632	1.24645	0.317821	0.750134	0.999117
hsa-miR-4486	5.70852	2.2913	0.407451	2.69729	0.211363	-3.52999	-1.81967	0.17064	0.999117
hsa-miR-378g	4.20628	8.33199	5.63641	3.30063	13.809	1.20499	0.269015	0.758122	0.999117
hsa-miR-4667-5p	2.80419	2.86412	3.46333	2.80376	3.73407	1.13343	0.1807	0.872677	0.999117
hsa-miR-637	1.70254	2.03092	2.51262	2.30689	7.18633	2.12363	1.08653	0.343885	0.999117
hsa-miR-7155-5p	2.15321	3.69732	3.05588	3.01671	9.93404	1.81423	0.859354	0.414397	0.999117
hsa-miR-6861-5p	0.500747	1.82262	0.746994	4.61379	2.04317	2.13934	1.09716	0.397897	0.999117
hsa-miR-6776-5p	3.20478	4.9992	0.611177	7.55951	5.42497	1.10824	0.14827	0.895464	0.999117
hsa-miR-4490	0.250374	3.17657	0.203726	1.27766	0.140908	-3.05831	-1.61273	0.314795	0.999117
hsa-miR-4774-5p	1.25187	0.468675	0.135817	6.67225	0.0704542	2.66487	1.41406	0.344151	0.999117
hsa-miR-7152-3p	14.8722	21.7673	10.1184	10.6472	23.109	-1.2553	-0.328029	0.663018	0.999117
hsa-miR-3663-5p	15.6734	9.16519	6.3834	8.12736	13.3158	-1.34203	-0.424417	0.62158	0.999117
hsa-miR-4299	2.35351	7.65502	9.30347	14.9416	7.6795	2.13158	1.09192	0.211143	0.999117
hsa-miR-548q	7.61136	10.6754	3.12379	11.0731	5.91815	-1.35419	-0.437429	0.652421	0.999117
hsa-miR-4456	3.00448	5.8324	8.69229	5.25262	16.4863	2.28688	1.19338	0.256385	0.999117
hsa-miR-7978	11.367	10.2067	12.4273	34.213	27.0544	2.28017	1.18914	0.116207	0.999117
hsa-miR-29b-1-5p	29.9447	47.0237	29.6081	47.3091	20.9249	-1.17772	-0.236003	0.781322	0.999117
hsa-miR-3137	4.70703	6.97804	3.93869	18.5616	24.7294	2.69362	1.42955	0.1226	0.999117
hsa-miR-20b-3p	16.0239	15.1017	15.6869	16.2902	16.4158	1.03762	0.0532777	0.944897	0.999117
hsa-miR-4742-3p	5.1577	1.40602	0.0679085	0.816285	7.11587	-1.23349	-0.302751	0.833708	0.999117
hsa-miR-6773-3p	296.543	163.88	294.519	224.585	101.947	-1.112	-0.153152	0.852923	0.999117
hsa-miR-215-3p	0.450673	1.77055	0.203726	3.22965	4.72043	2.44119	1.28758	0.338657	0.999117
hsa-miR-3120-5p	1512.16	1431.38	344.228	913.175	1519.91	-1.58978	-0.668829	0.438348	0.999117
hsa-miR-4677-3p	1.20179	0.2083	1.96935	1.38414	2.11363	2.53624	1.34269	0.354506	0.999117
hsa-miR-4679	18.6779	10.7274	6.17967	14.0543	14.2317	-1.27757	-0.353402	0.693403	0.999117
hsa-miR-6529-3p	2.25336	2.18715	2.51262	3.69103	5.9886	1.81875	0.862948	0.453817	0.999117
hsa-miR-5008-3p	7.16069	1.30187	1.96935	9.1211	6.69315	1.40275	0.488259	0.615425	0.999117
hsa-miR-134-3p	7.31091	38.4313	5.29686	5.67851	13.2454	-2.83497	-1.50334	0.116917	0.999117
hsa-miR-1267	4.10613	1.97885	3.32752	4.40084	3.73407	1.2627	0.336511	0.7614	0.999117
hsa-miR-367-5p	2.10314	4.27015	0.679085	6.35283	4.50907	1.21202	0.277416	0.805635	0.999117
hsa-miR-302a-5p	8.26233	0.676975	7.06249	2.62631	9.08859	1.39667	0.481996	0.665313	0.999117
hsa-miR-550b-3p	0.300448	2.86412	1.42608	2.20042	0.0704542	-1.27287	-0.348084	0.824273	0.999117
hsa-miR-676-5p	0.350523	2.34337	0.0679085	1.88101	6.48178	2.07867	1.05566	0.461652	0.999117
hsa-miR-412-3p	2.00299	3.7494	3.93869	2.80376	0.140908	-1.25025	-0.322215	0.810488	0.999117
hsa-miR-6837-3p	31.5471	32.3906	40.4735	27.2568	20.0794	-1.09257	-0.127724	0.874265	0.999117
hsa-miR-942-5p	24.5867	38.4313	54.8022	30.9124	32.9021	1.25375	0.32625	0.696616	0.999117
hsa-miR-3182	26.8401	40.2539	24.1754	35.1003	27.618	-1.15496	-0.207839	0.795222	0.999117
hsa-miR-4778-3p	4.10613	1.77055	7.26621	4.68477	0.0704542	1.36342	0.447234	0.734256	0.999117
hsa-miR-432-5p	45.2175	300.837	449.554	219.048	170.71	1.61688	0.693212	0.424699	0.999117
hsa-miR-643	44.8169	9.26934	12.8347	12.4927	9.2295	-2.34628	-1.23037	0.115689	0.999117
hsa-miR-3655	3.75561	5.4158	8.96392	7.73697	11.6954	2.04806	1.03426	0.274713	0.999117
hsa-miR-581	3.35501	2.81205	3.66706	2.37787	0	-1.52701	-0.610713	0.668261	0.999117
hsa-miR-302b-5p	5.70852	2.9162	0	8.97914	0.0704542	-1.42477	-0.510732	0.722361	0.999117
hsa-miR-3124-3p	0.751121	6.0407	2.98797	4.50731	0.140908	-1.3285	-0.409795	0.752397	0.999117
hsa-miR-9-5p	25.3879	13.4353	12.0877	29.2798	46.9929	1.51685	0.601074	0.496478	0.999117
hsa-miR-627-3p	6.65994	4.9992	5.43268	1.77453	8.66586	-1.10899	-0.149248	0.883773	0.999117
hsa-miR-570-3p	10.0149	5.98862	9.5751	4.43633	2.81817	-1.42898	-0.514982	0.550482	0.999117
hsa-miR-494-3p	24.4866	14.4768	19.4218	17.142	4.2977	-1.42875	-0.514754	0.561211	0.999117
hsa-miR-4738-3p	2.65396	0.833199	3.12379	7.2401	5.28406	2.99276	1.58148	0.12511	0.999117
hsa-miR-5681a	5.50822	13.7478	4.14242	12.8121	27.618	1.5423	0.625079	0.51164	0.999117
hsa-miR-6730-5p	3.20478	2.75997	4.21033	6.31734	8.59541	2.13111	1.0916	0.277825	0.999117
hsa-miR-4680-5p	1.50224	0.260375	2.51262	0.106472	0	-1.01553	-0.0222309	0.989769	0.999117
hsa-miR-3185	12.6689	4.166	6.17967	5.28811	0.774996	-2.05706	-1.04058	0.299304	0.999117
hsa-miR-4699-5p	7.06054	1.56225	1.15444	8.05638	28.6044	2.9187	1.54532	0.14526	0.999117
hsa-miR-4786-3p	12.9694	20.2051	1.22235	16.8936	16.3454	-1.44266	-0.528736	0.599952	0.999117
hsa-miR-7706	5.5583	4.06185	7.67366	1.9165	5.56588	1.04232	0.0597958	0.953581	0.999117
hsa-miR-3928-5p	0.751121	1.0415	1.6298	0.780795	1.05681	1.2286	0.297017	0.836531	0.999117
hsa-miR-1252-5p	7.16069	5.36372	3.46333	5.39458	4.64998	-1.36771	-0.451762	0.645478	0.999117
hsa-miR-4493	19.2788	26.3499	6.17967	10.2568	13.3863	-2.29369	-1.19767	0.157279	0.999117
hsa-miR-7515	9.06353	14.9455	0.339543	12.8831	22.8272	1.001	0.00143549	0.998944	0.999117
hsa-miR-3179	0.200299	0.364525	0.271634	4.50731	0.0704542	5.66526	2.50214	0.118971	0.999117
hsa-miR-493-3p	1309.65	1213.24	2105.3	931.595	654.519	-1.02519	-0.0358891	0.966414	0.999117
hsa-miR-548ao-5p	10.9664	17.0806	4.14242	9.36954	55.5883	1.64134	0.714876	0.43089	0.999117
hsa-miR-5585-5p	0.400598	0.2083	1.15444	2.48435	0.422725	4.45643	2.15589	0.152127	0.999117
hsa-miR-4795-5p	5.50822	4.94712	3.66706	5.21713	8.73632	1.11887	0.162048	0.847663	0.999117
hsa-miR-15b-3p	78.6174	95.87	75.9217	36.8038	9.2295	-2.146	-1.10165	0.196579	0.999117
hsa-miR-10393-5p	20.5807	27.5477	16.0264	15.403	10.2159	-1.72711	-0.788363	0.306828	0.999117
hsa-miR-219b-3p	3.35501	4.84297	5.70432	9.05012	3.17044	1.46986	0.555682	0.54195	0.999117
hsa-miR-549a-3p	4.40658	1.14565	0.203726	1.63257	0	-4.40008	-2.13753	0.171046	0.999117
hsa-miR-4462	2.35351	13.9561	0.882811	5.46556	15.5704	-1.11665	-0.159183	0.885665	0.999117
hsa-miR-2277-3p	3.65546	3.02035	1.83353	2.34238	0.352271	-2.16994	-1.11765	0.387806	0.999117
hsa-miR-4645-3p	0.300448	1.14565	1.69771	0.248435	4.72043	3.03675	1.60253	0.296945	0.999117
hsa-miR-3913-3p	0.250374	1.2498	1.5619	1.20668	6.48178	4.06868	2.02456	0.13154	0.999117
hsa-miR-591	2.10314	3.69732	2.98797	1.45512	3.24089	-1.15304	-0.205443	0.86441	0.999117
hsa-miR-1180-5p	3.25486	1.97885	0.135817	1.06472	11.9068	1.66469	0.735254	0.580339	0.999117
hsa-miR-6859-3p	1.85277	0.156225	0.271634	6.42381	0.0704542	2.24642	1.16763	0.444227	0.999117
hsa-miR-6846-3p	13.5202	7.03012	5.16105	10.7892	25.9976	1.35928	0.442843	0.636895	0.999117
hsa-miR-29c-5p	62.994	106.858	41.1526	123.685	147.531	1.22615	0.294132	0.710878	0.999117
hsa-miR-6790-3p	6.96039	18.6949	10.7295	10.2568	4.22725	-1.52287	-0.606796	0.496674	0.999117
hsa-miR-6821-3p	0.450673	1.30187	2.85216	3.7975	0.0704542	2.55545	1.35358	0.337857	0.999117
hsa-miR-3661	10.716	10.5191	11.3407	8.87267	0.140908	-1.56347	-0.644752	0.586841	0.999117
hsa-miR-6759-3p	2.55381	2.34337	0.339543	1.31315	4.79088	-1.14511	-0.195487	0.88156	0.999117
hsa-miR-6786-3p	0.250374	2.34337	0.339543	1.24217	0.422725	-1.88652	-0.915726	0.542209	0.999117
hsa-miR-6831-3p	0.500747	2.4996	3.80288	0.319416	4.01589	1.79598	0.844772	0.541952	0.999117
hsa-miR-10525-3p	4.70703	8.85274	4.48196	5.28811	0.0704542	-2.05997	-1.04262	0.377008	0.999117
hsa-miR-4513	1.90284	0.2083	1.83353	0.212944	0.140908	-1.45898	-0.544965	0.740455	0.999117
hsa-miR-6857-3p	5.00747	1.40602	5.70432	1.5261	12.6818	2.06099	1.04333	0.35833	0.999117
hsa-miR-5002-3p	0.801196	0.2083	0.679085	1.20668	1.6909	2.32857	1.21945	0.422977	0.999117
hsa-miR-617	2.35351	0.468675	0.543268	3.86848	2.74771	1.69515	0.76141	0.561633	0.999117
hsa-miR-6505-3p	2.85426	0.989424	1.08654	9.75993	1.47954	2.14523	1.10114	0.36902	0.999117
hsa-miR-539-5p	46.87	23.0171	32.9356	33.9291	34.9453	-1.0299	-0.0424981	0.959398	0.999117
hsa-miR-589-5p	6.35949	10.5712	6.24758	6.0689	3.31135	-1.61434	-0.69094	0.459717	0.999117
hsa-miR-146a-5p	67.9014	73.634	78.0269	34.7099	45.8657	-1.33986	-0.422084	0.599387	0.999117
hsa-miR-1253	37.2055	43.2743	30.0835	49.9709	115.827	1.62208	0.697843	0.403051	0.999117
hsa-miR-6770-5p	17.5262	20.9341	8.89602	13.0606	29.3089	-1.12665	-0.172038	0.828033	0.999117
hsa-miR-4524a-3p	3.70553	4.3743	6.92667	6.99166	6.62269	1.70384	0.768786	0.344503	0.999117
hsa-miR-4786-5p	9.46413	7.29049	9.30347	4.29437	11.3431	-1.01461	-0.0209311	0.983562	0.999117
hsa-miR-769-5p	14.071	8.07162	18.1316	6.24636	5.28406	-1.12175	-0.165751	0.848238	0.999117
hsa-miR-873-3p	0.450673	0.937349	3.66706	2.59082	1.12727	3.53849	1.82314	0.162036	0.999117
hsa-miR-4693-3p	7.06054	1.97885	1.76562	5.92694	5.00225	-1.06482	-0.0906064	0.931595	0.999117
hsa-miR-143-3p	9046.5	8021.16	11308.3	4808.7	3035.24	-1.33674	-0.418715	0.645496	0.999117
hsa-miR-4708-5p	5.7586	6.09277	8.96392	2.51984	8.73632	1.13028	0.176679	0.832213	0.999117
hsa-miR-5186	3.90583	14.0082	5.5685	10.9311	37.4816	2.00715	1.00515	0.282957	0.999117
hsa-miR-3663-3p	0.200299	2.23922	0.203726	1.70355	8.17268	2.74155	1.45499	0.298148	0.999117
hsa-miR-4468	1.25187	1.97885	0.407451	1.27766	4.64998	1.29946	0.377913	0.772692	0.999117
hsa-miR-1225-3p	7.36099	7.91539	3.25961	4.89771	0.352271	-2.67184	-1.41784	0.198348	0.999117
hsa-miR-1233-3p	0.350523	1.97885	0.339543	4.89771	7.60905	3.6638	1.87334	0.147072	0.999117
hsa-miR-4537	1.90284	2.81205	3.87079	4.25888	2.95908	1.60496	0.682539	0.530988	0.999117
hsa-miR-2114-3p	9.41405	11.1961	3.59915	13.0606	0.634088	-1.78006	-0.831923	0.460667	0.999117
hsa-miR-339-3p	33.6002	35.5672	22.3419	16.1837	42.7657	-1.27853	-0.354485	0.663787	0.999117
hsa-miR-610	6.65994	2.23922	0.882811	14.4092	0.634088	1.19651	0.258833	0.810037	0.999117
hsa-miR-3160-3p	10.8662	6.8739	11.6124	12.8121	6.55224	1.1684	0.224532	0.786635	0.999117
hsa-miR-558	0.150224	1.71847	3.66706	3.33612	0.0704542	2.51821	1.3324	0.354801	0.999117
hsa-miR-27b-5p	50.4753	31.1929	22.8173	18.2777	0	-2.97955	-1.57509	0.188974	0.999117
hsa-miR-3928-3p	6.71002	0.572825	0.746994	1.81002	0.563633	-3.44342	-1.78384	0.194993	0.999117
hsa-miR-4751	0.150224	3.07242	0.271634	1.84551	13.7386	3.26784	1.70834	0.197825	0.999117
hsa-miR-3150b-3p	1.35202	6.19692	2.58052	5.25262	9.79313	1.55495	0.636871	0.528141	0.999117
hsa-miR-1185-5p	95.4925	86.0278	109.197	53.0231	63.761	-1.20572	-0.26989	0.739165	0.999117
hsa-miR-3605-5p	6.40957	3.38487	12.8347	6.77872	0.281817	1.35375	0.436964	0.683449	0.999117
hsa-miR-1827	64.0957	58.7406	102.406	46.6702	28.8862	-1.03556	-0.050418	0.952078	0.999117
hsa-miR-5008-5p	57.7863	25.3605	9.23556	40.3884	123.436	1.38731	0.472293	0.606109	0.999117
hsa-miR-6089	2.20329	1.51017	2.17307	4.61379	8.31359	2.69851	1.43216	0.18797	0.999117
hsa-miR-3197	11.6674	1.4581	1.22235	14.1608	31.1407	2.36097	1.23938	0.249586	0.999117
hsa-miR-2467-5p	6.50972	1.51017	2.64843	7.77246	1.83181	1.02424	0.0345484	0.974848	0.999117
hsa-miR-485-5p	698.443	475.705	475.224	468.796	704.119	-1.06872	-0.0958815	0.90812	0.999117
hsa-miR-3188	0.0500747	2.03092	0	1.34865	8.10223	3.01199	1.59072	0.330914	0.999117
hsa-miR-3126-5p	11.0665	113.211	4.0066	22.6076	36.4248	-2.95648	-1.56388	0.11444	0.999117
hsa-miR-4510	70.1046	55.0432	118.093	49.9354	18.5294	-1.00633	-0.00910813	0.991738	0.999117
hsa-miR-3616-3p	0.100149	3.17657	0.339543	1.66806	0.0704542	-2.31505	-1.21104	0.443321	0.999117
hsa-miR-4721	6.50972	8.12369	11.0012	2.59082	0.211363	-1.59088	-0.669823	0.578009	0.999117
hsa-miR-3184-5p	142.763	90.975	123.865	137.881	67.8474	-1.06337	-0.0886498	0.909548	0.999117
hsa-miR-1914-3p	1.70254	1.35395	0.543268	2.83925	2.67726	1.33102	0.412529	0.742337	0.999117
hsa-miR-6804-5p	5.50822	7.34257	8.96392	2.41337	27.4771	2.0115	1.00827	0.300099	0.999117
hsa-let-7a-5p	108394	131584	167204	82129.5	69447.1	-1.1292	-0.175302	0.811568	0.999117
hsa-miR-202-3p	6.65994	7.65502	5.50059	9.29856	0.84545	-1.36646	-0.450446	0.640458	0.999117
hsa-miR-7854-3p	12.3184	5.10335	7.60575	9.01463	9.29995	-1.00823	-0.0118282	0.989305	0.999117
hsa-miR-6134	12.6689	30.3597	26.756	16.6451	13.7386	-1.12992	-0.176221	0.816772	0.999117
hsa-miR-655-5p	7.41106	9.42557	5.43268	6.28185	2.81817	-1.71708	-0.779955	0.397982	0.999117
hsa-miR-377-5p	164.796	185.595	247.255	111.76	65.4519	-1.23831	-0.30837	0.705735	0.999117
hsa-miR-496	162.042	131.489	122.643	72.4719	48.1907	-1.8098	-0.85583	0.281238	0.999117
hsa-miR-5702	1.05157	1.2498	3.1917	3.37161	0.634088	2.09595	1.0676	0.398356	0.999117
hsa-miR-4785	1.25187	0.364525	1.15444	1.41963	3.59316	2.50544	1.32506	0.351095	0.999117
hsa-miR-924	6.45964	3.1245	8.14902	6.88519	2.95908	1.25341	0.325854	0.717426	0.999117
hsa-miR-1236-5p	2.20329	0.156225	0.339543	3.58456	2.32499	1.76693	0.821244	0.550727	0.999117
hsa-miR-4765	2.25336	0.31245	2.64843	4.25888	0.352271	1.88915	0.91774	0.516042	0.999117
hsa-miR-1909-5p	0.801196	1.8747	1.6298	4.29437	5.63633	2.87728	1.5247	0.194856	0.999117
hsa-miR-4481	0.500747	1.4581	0.339543	1.5261	5.70679	2.5595	1.35586	0.318643	0.999117
hsa-miR-574-5p	1296.99	1490.54	1542.13	1340.7	879.127	-1.11144	-0.152429	0.85225	0.999117
hsa-miR-3659	0.200299	6.56145	0.135817	4.40084	4.72043	-1.09436	-0.130085	0.923673	0.999117
hsa-miR-4424	2.25336	0.052075	0.339543	2.2714	0	-1.31049	-0.390103	0.821983	0.999117
hsa-miR-219a-1-3p	16.8752	8.01954	38.6399	5.89145	1.05681	1.22015	0.287063	0.793999	0.999117
hsa-miR-144-5p	0	1.30187	1.69771	2.98122	1.76135	3.28682	1.71669	0.229665	0.999117
hsa-miR-190a-5p	4.90733	3.43695	5.70432	5.46556	0.140908	-1.10453	-0.143427	0.910909	0.999117
hsa-miR-3145-3p	0.751121	2.75997	0.746994	1.66806	0	-2.14007	-1.09766	0.477378	0.999117
hsa-miR-383-5p	121.632	192.209	146.818	84.9647	84.7564	-1.48759	-0.572976	0.472102	0.999117
hsa-miR-4772-5p	0.300448	0.31245	0.611177	1.20668	0.140908	2.20011	1.13757	0.465268	0.999117
hsa-miR-4454	13.7205	12.6021	3.80288	33.5032	12.8931	1.27333	0.34861	0.67956	0.999117
hsa-miR-369-5p	13437.1	13071	15111.3	7373.4	11482.1	-1.17062	-0.227279	0.741634	0.999117
hsa-miR-4534	0.350523	1.6664	0.611177	3.97495	0.140908	1.5759	0.656173	0.656394	0.999117
hsa-miR-8069	5.30792	4.21807	0.814902	0.212944	11.3431	-1.15765	-0.211201	0.864763	0.999117
hsa-miR-3171	1.15172	1.8747	4.8215	3.22965	0.422725	1.8664	0.900258	0.492104	0.999117
hsa-miR-509-3p	3.30493	1.8747	1.90144	5.21713	7.82041	1.91929	0.940571	0.351909	0.999117
hsa-miR-508-3p	2.20329	0.937349	3.1917	3.54907	5.63633	2.60042	1.37874	0.218063	0.999117
hsa-miR-219a-5p	21.9828	12.2897	14.8041	12.7412	17.684	-1.14015	-0.18922	0.815959	0.999117
hsa-miR-548aj-5p	9.21375	13.2791	4.07451	8.69521	0.140908	-2.60301	-1.38018	0.184961	0.999117
hsa-miR-1468-3p	2.95441	0.468675	5.16105	0.425888	0	1.08504	0.117748	0.94318	0.999117
hsa-miR-891a-5p	2.45366	1.56225	0.746994	3.26514	0.422725	-1.32953	-0.410913	0.75532	0.999117
hsa-miR-891b	2.55381	0.729049	0.135817	3.86848	3.45225	1.51547	0.599768	0.668103	0.999117
hsa-miR-4696	27.3909	44.7845	48.7583	34.7099	73.836	1.45162	0.537661	0.502979	0.999117
hsa-miR-4708-3p	3.10463	2.34337	2.30889	6.03341	5.21361	1.66953	0.73944	0.480363	0.999117
hsa-miR-8064	0.150224	0.260375	0.271634	0.0354907	2.81817	4.89885	2.29244	0.185748	0.999117
hsa-miR-767-5p	1.80269	1.56225	2.10516	1.27766	9.65222	2.56376	1.35826	0.241457	0.999117
hsa-miR-6804-3p	0.250374	4.5826	0.135817	1.49061	0.140908	-3.97792	-1.99202	0.209386	0.999117
hsa-miR-3177-3p	65.4978	140.967	6.17967	63.6703	116.179	-1.66473	-0.735284	0.448604	0.999117
hsa-miR-298	1.65247	0.937349	1.90144	0.248435	4.64998	1.73253	0.792879	0.55971	0.999117
hsa-miR-3166	1.30194	0.052075	1.15444	0.0354907	0.211363	-1.4664	-0.552274	0.727506	0.999117
hsa-miR-4771	0.150224	1.09357	0.407451	0.177453	1.47954	1.08572	0.118648	0.941156	0.999117
hsa-miR-103a-3p	215.522	225.485	302.057	162.441	73.1314	-1.23043	-0.299164	0.730024	0.999117
hsa-miR-4722-5p	12.4185	11.6127	1.69771	21.1524	49.0361	1.99338	0.995219	0.282292	0.999117
hsa-miR-3665	8.06203	5.67617	3.59915	10.7182	19.9385	1.66071	0.7318	0.419398	0.999117
hsa-miR-657	6.65994	20.4134	5.02523	15.2255	34.5225	1.34823	0.431065	0.625645	0.999117
hsa-miR-6499-3p	162.042	161.068	162.437	42.3404	26.3499	-2.09721	-1.06847	0.216968	0.999117
hsa-miR-5689	2.15321	0.156225	0.203726	4.9332	2.88862	2.31423	1.21053	0.398899	0.999117
hsa-miR-7112-3p	1.45217	0.572825	2.24098	0.425888	0.634088	1.06789	0.0947613	0.949871	0.999117
hsa-miR-4711-5p	4.60688	3.85355	6.31549	5.3236	8.80677	1.58828	0.667466	0.410498	0.999117
hsa-miR-324-5p	24.086	13.6957	15.4152	9.61797	6.55224	-1.79512	-0.844081	0.335647	0.999117
hsa-miR-6076	6.00897	2.7079	1.76562	5.85596	12.8931	1.56623	0.647297	0.507925	0.999117
hsa-miR-5189-3p	1.95292	0.31245	0.679085	3.08769	2.53635	1.85644	0.892539	0.50117	0.999117
hsa-miR-4480	6.45964	41.2954	1.42608	49.474	6.90451	-1.23817	-0.308206	0.78951	0.999117
hsa-miR-4252	3.9559	4.06185	13.1743	2.55533	0.211363	1.32364	0.404507	0.731879	0.999117
hsa-miR-3194-5p	3.05456	6.76975	8.35275	8.05638	0.281817	1.13391	0.18131	0.872321	0.999117
hsa-miR-4755-3p	5.7586	0.260375	4.48196	3.83299	6.97496	1.68947	0.756569	0.502721	0.999117
hsa-miR-4641	6.76009	3.38487	4.68569	3.26514	8.94768	1.10309	0.141554	0.884902	0.999117
hsa-miR-5699-5p	2.90434	2.2913	1.35817	3.15867	0.563633	-1.49852	-0.583536	0.654225	0.999117
hsa-miR-4313	15.5732	12.0814	3.87079	20.7975	10.3568	-1.18089	-0.239878	0.790484	0.999117
hsa-miR-10396a-3p	31.497	25.1001	22.9531	13.7349	20.7135	-1.48634	-0.571768	0.486168	0.999117
hsa-miR-4749-3p	9.76458	7.39464	9.50719	2.48435	29.0976	1.5935	0.672198	0.480793	0.999117
hsa-miR-4707-3p	5.5583	4.73882	1.83353	1.77453	0.774996	-3.34893	-1.7437	0.160876	0.999117
hsa-miR-18b-3p	1.70254	0.10415	0.0679085	0.0709813	3.59316	1.36651	0.450501	0.790532	0.999117
hsa-miR-4290	13.5202	7.08219	19.2181	6.53028	5.42497	1.00703	0.0101088	0.990943	0.999117
hsa-miR-7976	1.20179	4.166	1.42608	2.02297	0.211363	-2.16489	-1.11429	0.403034	0.999117
hsa-miR-3173-5p	0.200299	4.84297	6.92667	5.03967	1.12727	1.7304	0.791107	0.530097	0.999117
hsa-miR-938	0.0500747	2.083	0.0679085	2.09395	2.04317	1.3159	0.396052	0.802222	0.999117
hsa-miR-6886-3p	4.00598	1.0415	0.814902	1.56159	16.5567	2.49209	1.31735	0.295228	0.999117
hsa-miR-4632-3p	20.0299	7.13427	22.0024	13.2735	10.9204	1.13279	0.179879	0.843375	0.999117
hsa-miR-6869-3p	55.2825	28.6933	22.8852	34.071	41.7089	-1.27668	-0.352397	0.679473	0.999117
hsa-miR-3648	25.9387	45.4094	23.9038	25.4823	62.2815	1.0427	0.0603174	0.944849	0.999117
hsa-miR-6743-3p	4.65695	2.55167	2.98797	3.44259	5.8477	1.12711	0.172634	0.877148	0.999117
hsa-miR-24-1-5p	11.6674	5.88447	9.5751	10.0793	0.211363	-1.32367	-0.404544	0.716203	0.999117
hsa-miR-3135a	0.400598	17.6534	6.72294	69.4197	4.2977	2.9703	1.57061	0.188215	0.999117
hsa-miR-6778-3p	11.6674	3.85355	6.17967	4.5783	7.39769	-1.28705	-0.364063	0.703708	0.999117
hsa-miR-6791-3p	8.31241	12.0293	14.3287	12.9186	13.1045	1.32068	0.40128	0.658627	0.999117
hsa-miR-2682-3p	17.9768	13.175	18.2674	8.44678	14.6545	-1.1348	-0.182443	0.833016	0.999117
hsa-miR-4763-5p	11.8677	9.21727	6.45131	9.83092	14.7954	-1.01916	-0.0273866	0.975143	0.999117
hsa-miR-3116	29.1936	20.8821	7.60575	21.6848	27.7589	-1.31613	-0.396302	0.652532	0.999117
hsa-miR-661	2.00299	13.7999	2.30889	11.2151	0.704542	-1.65899	-0.730309	0.512043	0.999117
hsa-miR-214-5p	1541	2094.45	1212.91	1378.71	342.689	-1.85837	-0.894036	0.299732	0.999117
hsa-miR-6811-3p	13.8206	4.32222	2.51262	3.01671	7.89087	-2.0337	-1.02411	0.27735	0.999117
hsa-miR-4297	7.86174	8.43614	5.09314	4.61379	6.27042	-1.57577	-0.65606	0.491021	0.999117
hsa-miR-4312	5.50822	3.02035	0.339543	5.21713	3.09998	-1.46879	-0.554631	0.646062	0.999117
hsa-miR-1273c	0.200299	0.364525	0.0679085	1.41963	0.211363	2.05677	1.04038	0.515582	0.999117
hsa-miR-3683	5.70852	3.17657	5.90804	7.16912	9.65222	1.69891	0.764613	0.412806	0.999117
hsa-miR-381-5p	7.41106	11.8731	15.4152	9.68895	10.9909	1.24349	0.31439	0.722445	0.999117
hsa-miR-3195	19.429	21.0383	30.8984	14.9416	31.6339	1.2727	0.347889	0.687858	0.999117
hsa-miR-668-5p	5.5583	5.72825	4.14242	8.58874	5.14315	1.07048	0.0982613	0.90679	0.999117
hsa-miR-6720-3p	23.7354	16.0391	17.6562	31.4092	16.134	1.09623	0.132553	0.866039	0.999117
hsa-miR-4783-5p	9.3139	5.2075	3.32752	3.72652	19.3044	1.20736	0.271852	0.785228	0.999117
hsa-miR-2277-5p	9.3139	14.8934	5.90804	13.1315	33.7475	1.45257	0.538612	0.502408	0.999117
hsa-miR-658	1.15172	0.676975	2.3768	3.7975	4.22725	3.78028	1.91849	0.124107	0.999117
hsa-miR-6820-5p	14.6719	10.4671	6.72294	4.25888	6.90451	-2.13662	-1.09533	0.234367	0.999117
hsa-miR-1199-3p	1.95292	4.5826	2.78425	7.2401	7.46814	1.78815	0.838467	0.417064	0.999117
hsa-miR-3960	36.6547	36.7649	18.4711	32.8289	38.6793	-1.22331	-0.290795	0.725084	0.999117
hsa-miR-4767	8.86323	9.37349	7.9453	2.80376	5.49543	-1.69946	-0.765073	0.420099	0.999117
hsa-miR-10396a-5p	145.718	87.4339	84.1386	115.167	99.9745	-1.16807	-0.224131	0.767475	0.999117
hsa-miR-3621	13.5703	20.9862	12.4273	9.72444	24.1658	-1.12195	-0.166011	0.831779	0.999117
hsa-miR-4746-3p	0.901345	0.572825	1.08654	0.283925	2.32499	1.63064	0.705434	0.645098	0.999117
hsa-miR-6853-5p	3.20478	2.2913	0.203726	13.5929	7.89087	2.62984	1.39497	0.223696	0.999117
hsa-miR-6854-3p	0	3.07242	3.05588	3.90397	0	1.50974	0.594305	0.713902	0.999117
hsa-miR-187-5p	9.01345	5.4158	9.37137	13.238	7.11587	1.38071	0.46541	0.582616	0.999117
hsa-miR-548v	3.30493	2.81205	3.05588	1.81002	0.563633	-1.6855	-0.753177	0.548688	0.999117
hsa-miR-221-3p	64097.3	44717.6	51813.6	63967.3	17125.9	-1.2281	-0.296423	0.693087	0.999117
hsa-miR-621	0	0.10415	0.203726	0.212944	0.281817	4.03164	2.01137	0.230892	0.999117
hsa-miR-8086	0.550822	0.885274	2.92007	2.83925	2.6068	3.89011	1.95981	0.126303	0.999117
hsa-miR-31-3p	254.179	203.978	242.773	135.219	77.0064	-1.51046	-0.594984	0.483691	0.999117
hsa-miR-7158-5p	0.95142	0.10415	0.271634	0.674323	0	-1.60507	-0.682637	0.65985	0.999117
hsa-miR-3934-3p	9.81465	8.07162	1.69771	4.54281	8.59541	-1.80997	-0.855966	0.383795	0.999117
hsa-miR-549a-5p	3.80568	3.85355	2.03726	6.60126	0.211363	-1.28931	-0.366596	0.767931	0.999117
hsa-miR-6847-3p	4.70703	3.48902	3.12379	5.82047	11.2022	1.63411	0.708504	0.41669	0.999117
hsa-miR-7106-3p	4.30643	7.39464	5.09314	4.89771	1.47954	-1.52099	-0.605007	0.565081	0.999117
hsa-miR-4268	9.9148	8.12369	4.48196	6.92068	25.434	1.35913	0.442679	0.634015	0.999117
hsa-miR-4448	0.550822	2.86412	2.10516	2.91023	2.18408	1.41215	0.497892	0.694683	0.999117
hsa-miR-423-3p	5376.58	4807.66	5637.9	3982.23	1388.72	-1.38764	-0.472633	0.603952	0.999117
hsa-miR-1301-5p	2.50374	1.71847	1.01863	2.2714	0.211363	-1.76366	-0.818575	0.551886	0.999117
hsa-miR-3194-3p	1.85277	1.4581	0.746994	6.56577	4.57952	2.39932	1.26263	0.294603	0.999117
hsa-miR-4663	2.90434	1.35395	0.271634	0.993739	0.563633	-3.2994	-1.7222	0.230583	0.999117
hsa-miR-7160-5p	1.65247	5.15542	1.35817	4.96869	8.66586	1.46715	0.55302	0.604976	0.999117
hsa-miR-8077	6.40957	3.64525	1.83353	5.46556	6.48178	-1.0924	-0.1275	0.907786	0.999117
hsa-miR-8075	4.1562	1.61432	2.24098	1.77453	0.281817	-1.99925	-0.99946	0.440825	0.999117
hsa-miR-6882-3p	3.9559	6.19692	0.543268	2.23591	3.17044	-2.54963	-1.35029	0.2442	0.999117
hsa-miR-3135b	13.6203	15.6746	3.12379	8.34031	29.5908	-1.07123	-0.0992693	0.917219	0.999117
hsa-miR-1287-5p	36.3543	52.6999	42.8503	36.8393	27.8999	-1.24086	-0.311344	0.697011	0.999117
hsa-miR-5580-5p	7.86174	5.46787	6.92667	11.0376	7.25678	1.2731	0.348341	0.732308	0.999117
hsa-miR-4731-5p	14.0209	8.43614	3.05588	9.75993	10.1454	-1.46389	-0.549806	0.523669	0.999117
hsa-miR-5589-5p	14.722	19.0074	9.03183	24.2756	49.177	1.62964	0.704552	0.46394	0.999117
hsa-miR-133a-5p	2.10314	1.35395	0.339543	8.87267	5.9886	2.92948	1.55064	0.17443	0.999117
hsa-miR-6131	1381.16	1809.34	1652.28	961.158	1852.38	-1.07169	-0.0998943	0.906347	0.999117
hsa-miR-138-5p	1675.9	1189.76	2354.32	1105.71	397.784	-1.11423	-0.156049	0.859925	0.999117
hsa-miR-1537-5p	1.10164	1.2498	2.78425	1.77453	0.211363	1.35405	0.437278	0.764175	0.999117
hsa-miR-4718	75.9133	83.1116	89.7071	114.351	44.2452	1.04158	0.058778	0.944758	0.999117
hsa-miR-4999-5p	0.250374	1.61432	2.58052	3.22965	0.634088	2.31092	1.20847	0.366945	0.999117
hsa-miR-4804-3p	2.15321	3.69732	5.09314	4.54281	0.352271	1.14086	0.190119	0.874918	0.999117
hsa-miR-4720-3p	0.100149	1.61432	0.203726	4.15241	0.140908	1.75782	0.813785	0.608861	0.999117
hsa-miR-2115-5p	1.40209	7.70709	2.17307	2.41337	0.0704542	-2.91205	-1.54204	0.262044	0.999117
hsa-miR-516a-3p	10.9163	13.175	8.28484	14.4447	25.0112	1.31994	0.40047	0.641483	0.999117
hsa-miR-103a-1-5p	12.7691	4.63467	5.97595	9.54699	12.8227	1.08516	0.117911	0.89104	0.999117
hsa-miR-4327	108.111	31.922	77.0762	56.3947	21.9112	-1.35169	-0.434769	0.602413	0.999117
hsa-miR-1251-3p	13.6704	17.341	20.3046	25.6952	9.51131	1.1963	0.258576	0.744678	0.999117
hsa-miR-3140-3p	4.9574	10.8837	10.2542	1.98748	0	-1.94086	-0.956693	0.469358	0.999117
hsa-miR-3148	6.25934	1.19772	1.76562	18.1002	0.0704542	1.78358	0.83478	0.50987	0.999117
hsa-miR-6124	8.36248	3.69732	5.63641	6.53028	4.50907	-1.08056	-0.111785	0.896926	0.999117
hsa-miR-147b-5p	5.90882	4.68675	3.25961	7.34657	8.59541	1.2102	0.275241	0.764076	0.999117
hsa-miR-5093	3.10463	1.97885	5.77222	1.9165	5.21361	1.67242	0.741935	0.518677	0.999117
hsa-miR-7-5p	6727.14	11858	13017.3	5103.81	5766.32	-1.16705	-0.222863	0.758899	0.999117
hsa-miR-6077	4.45665	4.9992	4.7536	4.22339	12.259	1.48919	0.574531	0.533036	0.999117
hsa-miR-671-5p	52.5785	97.7447	175.611	61.1149	31.493	1.1894	0.250229	0.768121	0.999117
hsa-miR-4533	6.50972	23.7983	6.99458	16.7516	35.4384	1.30141	0.380078	0.650434	0.999117
hsa-miR-3202	147.27	49.8878	69.6741	93.6599	116.672	-1.05623	-0.0789276	0.924372	0.999117
hsa-miR-1-3p	8.21226	12.2897	5.02523	9.47601	9.93404	-1.25424	-0.326809	0.69249	0.999117
hsa-miR-711	4.30643	2.083	2.03726	1.24217	2.4659	-1.70271	-0.767833	0.527491	0.999117
hsa-miR-492	3.65546	5.98862	2.85216	4.32986	3.80453	-1.29847	-0.376813	0.697914	0.999117
hsa-miR-659-5p	3.30493	1.61432	0.47536	4.11692	12.8931	2.36296	1.2406	0.286157	0.999117
hsa-miR-184	0.851271	5.67617	4.61778	2.69729	11.8363	1.95039	0.963761	0.379499	0.999117
hsa-miR-6503-3p	1.70254	0.937349	1.69771	2.76827	3.87498	2.09289	1.06549	0.39706	0.999117
hsa-miR-4740-5p	2.30344	2.81205	1.76562	4.08143	11.2022	2.21388	1.14657	0.281708	0.999117
hsa-miR-1288-3p	6.20927	2.75997	2.03726	1.34865	1.83181	-2.6129	-1.38565	0.274821	0.999117
hsa-miR-4515	5.358	0.781124	2.85216	4.04594	3.66362	1.14724	0.198172	0.866082	0.999117
hsa-miR-4434	8.9133	18.9032	13.8533	11.57	23.8135	1.17788	0.236196	0.775571	0.999117
hsa-miR-139-3p	0.600897	6.0407	6.45131	1.27766	0.281817	-1.24498	-0.316124	0.819638	0.999117
hsa-miR-185-5p	59.9395	118.21	88.0094	59.4114	36.9884	-1.449	-0.535059	0.516488	0.999117
hsa-miR-5192	2.35351	3.22865	6.72294	4.79124	5.49543	1.99954	0.999667	0.324079	0.999117
hsa-miR-6081	4.80718	1.61432	4.8215	8.19834	6.90451	2.06985	1.04953	0.261001	0.999117
hsa-miR-505-5p	8.41256	13.6957	14.3287	11.4635	6.27042	-1.03282	-0.0465837	0.957818	0.999117
hsa-miR-4633-3p	1.95292	1.2498	2.51262	4.82673	5.28406	2.62885	1.39443	0.219418	0.999117
hsa-miR-766-5p	1.95292	1.19772	5.70432	5.92694	0.0704542	2.47299	1.30625	0.317813	0.999117
hsa-miR-6894-5p	13.0695	20.0489	10.2542	8.09187	38.2566	1.13796	0.186451	0.824444	0.999117
hsa-miR-3612	2.55381	0.2083	0.611177	0.0709813	1.19772	-2.23118	-1.15781	0.481482	0.999117
hsa-miR-1249-5p	4.00598	1.56225	1.69771	0.141963	1.90226	-2.25839	-1.1753	0.381291	0.999117
hsa-miR-3689d	5.20777	5.98862	4.41405	18.3487	7.74996	1.82367	0.866842	0.324856	0.999117
hsa-miR-4294	630.04	158.985	84.7498	1126.9	1909.73	2.6373	1.39906	0.160995	0.999117
hsa-miR-504-3p	5.10762	2.9162	4.14242	2.59082	9.65222	1.35254	0.435671	0.678217	0.999117
hsa-miR-122-5p	2.30344	6.09277	2.03726	5.28811	5.0727	-1.0115	-0.0165021	0.987463	0.999117
hsa-miR-4653-3p	0.150224	2.96827	0.611177	0.709813	0	-3.46223	-1.7917	0.284107	0.999117
hsa-miR-3201	6.86024	9.68594	5.77222	8.55325	26.7021	1.65037	0.722786	0.455834	0.999117
hsa-miR-6744-5p	9.26383	27.6518	20.3046	14.9416	6.69315	-1.31954	-0.400036	0.645915	0.999117
hsa-miR-1255a	4.3565	9.52972	12.4273	7.09813	2.25453	1.04588	0.0647206	0.947829	0.999117
hsa-miR-1193	2.95441	8.27992	2.17307	7.16912	12.6113	1.30221	0.380961	0.673689	0.999117
hsa-miR-4764-5p	2.95441	3.85355	1.29026	7.06264	12.3999	2.02987	1.02138	0.266168	0.999117
hsa-miR-4320	2.35351	4.00977	2.51262	11.6764	4.72043	1.99105	0.99353	0.277247	0.999117
hsa-miR-3167	1.65247	3.43695	0.339543	1.95199	0	-3.248	-1.69955	0.265742	0.999117
hsa-miR-1290	7.21076	8.38407	2.85216	10.7182	13.3863	1.15324	0.205688	0.812376	0.999117
hsa-miR-196a-3p	4.1562	1.19772	2.98797	1.5261	0.422725	-1.62575	-0.701102	0.58589	0.999117
hsa-miR-31-5p	1905.14	1513.14	1526.31	981.672	220.874	-1.87895	-0.909927	0.30745	0.999117
hsa-miR-6809-5p	4.80718	5.25957	3.93869	2.59082	6.90451	-1.13725	-0.185544	0.858771	0.999117
hsa-miR-593-5p	0.350523	1.51017	4.21033	0.106472	0.0704542	1.56181	0.64322	0.69649	0.999117
hsa-miR-564	21.2818	46.2946	0.543268	23.6368	80.7405	1.03496	0.0495809	0.96475	0.999117
hsa-miR-885-3p	5.10762	18.4345	10.9333	5.3236	4.57952	-1.69615	-0.76226	0.412678	0.999117
hsa-miR-4736	0.0500747	2.9162	1.6298	0.638832	0.0704542	-1.89635	-0.923222	0.569665	0.999117
hsa-miR-34a-5p	12116.5	16175.5	18083.6	5000.6	3367.78	-1.60435	-0.681988	0.381555	0.999117
hsa-miR-3622b-5p	0.450673	0.729049	4.0066	0.496869	0.704542	2.89823	1.53517	0.309485	0.999117
hsa-miR-1256	2.10314	7.23842	12.4273	6.21087	2.88862	1.53531	0.618529	0.501751	0.999117
hsa-miR-3926	1.95292	7.03012	0.611177	0.461379	3.66362	-2.86252	-1.51728	0.267077	0.999117
hsa-miR-4529-5p	5.45815	5.6241	5.36477	5.67851	9.15904	1.20433	0.26823	0.778643	0.999117
hsa-miR-3136-3p	8.9133	3.3328	2.44471	6.92068	16.9795	1.43213	0.518161	0.625717	0.999117
hsa-miR-874-5p	8.76308	4.68675	1.96935	3.97495	0.211363	-3.241	-1.69644	0.159987	0.999117
hsa-miR-1538	34.6016	36.0359	24.9224	37.7976	37.4112	-1.05609	-0.0787361	0.924306	0.999117
hsa-miR-6851-3p	5.05755	4.00977	7.1983	7.55951	6.05906	1.55596	0.637804	0.435011	0.999117
hsa-miR-4743-5p	1.95292	0.2083	0.271634	3.58456	0.0704542	1.22106	0.288133	0.857873	0.999117
hsa-miR-4757-5p	13.5202	9.21727	4.48196	8.80169	0.563633	-2.45066	-1.29317	0.210864	0.999117
hsa-miR-6735-3p	10.5658	10.3108	3.12379	10.8247	16.134	-1.04083	-0.0577336	0.94974	0.999117
hsa-miR-6717-5p	9.61435	28.6933	5.5685	24.7015	36.143	1.15588	0.208986	0.826941	0.999117
hsa-miR-8053	0.250374	0.31245	0.203726	1.84551	0	2.44371	1.28907	0.45509	0.999117
hsa-miR-6789-3p	23.6353	10.6754	18.4032	22.4656	36.8475	1.50859	0.593198	0.501243	0.999117
hsa-miR-4634	0.150224	2.44752	4.7536	3.19416	5.14315	3.34628	1.74256	0.151788	0.999117
hsa-miR-25-5p	13.0695	23.642	9.37137	25.9792	22.1931	1.04652	0.0656026	0.930858	0.999117
hsa-miR-10400-5p	89.2332	48.3776	30.3551	49.3675	78.7678	-1.30263	-0.381428	0.648016	0.999117
hsa-miR-10396b-5p	18.5777	5.46787	10.5258	7.2401	7.32723	-1.43898	-0.52505	0.54478	0.999117
hsa-miR-6069	25.0874	9.37349	44.0047	32.7934	32.1976	2.10703	1.07521	0.187248	0.999117
hsa-miR-4284	11.6173	8.01954	15.3473	12.4217	9.65222	1.26992	0.344739	0.699302	0.999117
hsa-miR-24-3p	25179.1	12830.9	23590.3	14848.8	6903.45	-1.25743	-0.330475	0.652257	0.999117
hsa-miR-10398-5p	5.7586	3.9577	4.07451	4.54281	9.15904	1.21213	0.277542	0.765132	0.999117
hsa-miR-760	65.2474	39.9415	55.4813	33.9291	11.2727	-1.56693	-0.647941	0.453032	0.999117
hsa-miR-604	8.16218	2.96827	10.7295	14.9771	12.3999	2.28246	1.19059	0.169101	0.999117
hsa-miR-6762-3p	0.701046	1.92677	2.24098	0.425888	0.352271	-1.31839	-0.39878	0.786636	0.999117
hsa-miR-4505	4.70703	4.00977	5.90804	8.19834	17.4726	2.40723	1.26738	0.166608	0.999117
hsa-miR-7974	25.8886	29.4224	39.2511	14.0543	8.80677	-1.33648	-0.418442	0.613365	0.999117
hsa-miR-4687-3p	7.51121	11.4044	2.71634	7.2401	9.01813	-1.49272	-0.57794	0.579629	0.999117
hsa-miR-6815-3p	8.01196	6.50937	6.58713	3.93946	2.4659	-1.67872	-0.747362	0.456665	0.999117
hsa-miR-3119	7.51121	9.11312	2.64843	4.54281	2.6068	-2.46852	-1.30364	0.173912	0.999117
hsa-miR-3153	8.9133	5.31165	0.271634	6.31734	10.2159	-1.26934	-0.344074	0.754616	0.999117
hsa-miR-1292-5p	25.9888	56.5534	20.4405	72.188	90.8859	1.48229	0.567827	0.506195	0.999117
hsa-miR-4471	0.400598	1.56225	1.42608	0.177453	10.3568	4.0325	2.01167	0.168966	0.999117
hsa-miR-4747-5p	4.50673	9.63387	9.5751	8.23384	0.140908	-1.18052	-0.239427	0.833238	0.999117
hsa-miR-6716-5p	1.65247	6.61352	0.135817	6.81421	0.0704542	-1.75512	-0.81157	0.569191	0.999117
hsa-miR-3649	0.701046	1.30187	1.69771	3.65554	2.67726	2.71554	1.44124	0.258768	0.999117
hsa-miR-92b-5p	27.1906	89.7252	15.4831	42.2339	86.3064	-1.21776	-0.284225	0.743288	0.999117
hsa-miR-3199	6.35949	2.65582	0.543268	4.36535	8.73632	1.00831	0.0119428	0.991583	0.999117
hsa-miR-365a-5p	0.200299	6.19692	1.22235	11.6764	3.52271	1.71365	0.777074	0.506525	0.999117
hsa-miR-6878-5p	1.65247	1.71847	6.72294	4.04594	0.352271	2.1961	1.13495	0.391413	0.999117
hsa-miR-6731-5p	33.5501	41.5037	44.1405	17.7808	23.6021	-1.31824	-0.398612	0.625748	0.999117
hsa-miR-6827-5p	17.2758	7.81124	4.07451	10.4343	12.8931	-1.37231	-0.456605	0.614156	0.999117
hsa-miR-6090	35.4028	12.0814	11.5444	23.1399	63.9724	1.38447	0.46933	0.590958	0.999117
hsa-miR-4300	2.20329	1.09357	0.339543	1.70355	6.69315	1.75766	0.813659	0.55137	0.999117
hsa-miR-7106-5p	12.2182	44.2637	8.42066	16.2547	27.6885	-1.61805	-0.694258	0.444027	0.999117
hsa-miR-149-3p	5.25785	2.34337	0.746994	1.84551	0.352271	-3.7328	-1.90026	0.146462	0.999117
hsa-miR-6799-5p	15.0224	12.3938	9.37137	17.3549	2.81817	-1.3873	-0.472284	0.600086	0.999117
hsa-miR-4713-3p	21.0314	49.2108	24.515	35.5971	64.6065	1.18338	0.242914	0.775875	0.999117
hsa-miR-638	8.66293	8.69652	4.61778	9.47601	26.2794	1.54837	0.630754	0.51167	0.999117
hsa-miR-5187-5p	18.5277	12.9146	13.8533	17.1775	23.1794	1.14772	0.198766	0.797276	0.999117
hsa-miR-6721-5p	0.100149	0.885274	1.08654	0.0354907	4.57952	3.80455	1.92772	0.231677	0.999117
hsa-miR-3945	0.350523	0.2083	0.271634	1.45512	0.563633	2.79867	1.48474	0.351038	0.999117
hsa-miR-4253	2.90434	9.00897	5.97595	4.75575	0.140908	-1.64027	-0.713935	0.543934	0.999117
hsa-miR-4640-5p	0.851271	2.60375	2.17307	2.83925	6.34088	2.17997	1.12431	0.332839	0.999117
hsa-miR-6508-3p	10.1151	3.64525	6.04386	5.46556	20.2203	1.53353	0.616854	0.487936	0.999117
hsa-miR-296-5p	18.6779	31.7657	30.7626	19.094	15.6408	-1.15584	-0.208941	0.80852	0.999117
hsa-miR-6877-5p	8.46263	7.03012	10.39	6.63676	36.3544	2.29257	1.19697	0.217977	0.999117
hsa-miR-2861	7.86174	4.89505	8.0132	13.6284	24.4476	2.40449	1.26573	0.170218	0.999117
hsa-miR-4649-5p	6.20927	34.3695	1.22235	7.41755	20.9953	-2.05411	-1.03851	0.316109	0.999117
hsa-miR-9899	9.86473	6.71767	4.0066	7.2401	8.59541	-1.25162	-0.323802	0.730549	0.999117
hsa-miR-10394-3p	3.40508	5.93655	2.85216	7.77246	23.3908	2.42342	1.27704	0.169775	0.999117
hsa-miR-585-3p	0.300448	0.364525	0.47536	0.816285	3.59316	4.77573	2.25572	0.13908	0.999117
hsa-miR-1268a	34.6517	36.7649	18.4032	24.1691	10.6386	-2.0053	-1.00382	0.268059	0.999117
hsa-miR-664b-5p	0.250374	0.052075	0.271634	0.319416	0.493179	2.22679	1.15496	0.449391	0.999117
hsa-miR-4437	3.80568	0.572825	2.3768	1.70355	15.1476	2.91492	1.54345	0.186739	0.999117
hsa-miR-4656	1.85277	0.2083	0.611177	1.59708	0.211363	-1.25282	-0.325177	0.833236	0.999117
hsa-miR-6829-5p	0.550822	5.15542	0.47536	3.97495	6.97496	1.33422	0.415998	0.740232	0.999117
hsa-miR-4492	16.8251	12.1335	35.7878	18.7391	45.8657	2.30629	1.20557	0.179494	0.999117
hsa-miR-4675	8.71301	7.91539	6.65503	9.22757	6.55224	-1.08983	-0.124101	0.902507	0.999117
hsa-miR-27a-5p	103.254	47.3361	50.8635	37.8331	30.5771	-1.894	-0.921436	0.244045	0.999117
hsa-miR-4271	5.60837	10.4671	9.84673	9.75993	3.94543	-1.02049	-0.0292678	0.977629	0.999117
hsa-miR-3144-5p	0.200299	0.572825	0.543268	0.106472	1.90226	2.14326	1.09981	0.490088	0.999117
hsa-miR-3191-3p	4.20628	5.72825	1.42608	8.16285	0.563633	-1.45627	-0.542281	0.635651	0.999117
hsa-miR-4652-5p	2.90434	0.4166	0.135817	1.10021	0	-3.86403	-1.9501	0.239381	0.999117
hsa-miR-3175	7.71151	3.59317	1.42608	14.3737	3.94543	1.16852	0.224678	0.824263	0.999117
hsa-miR-1343-5p	9.06353	3.1245	5.43268	12.7057	4.64998	1.25123	0.32335	0.738932	0.999117
hsa-miR-6825-5p	3.10463	3.7494	2.78425	1.84551	23.109	2.6904	1.42782	0.157559	0.999117
hsa-miR-4450	96.5942	122.272	39.1832	59.5533	60.7315	-2.05689	-1.04046	0.176407	0.999117
hsa-miR-486-3p	4.90733	4.32222	3.59915	0.709813	7.82041	-1.14754	-0.198538	0.857833	0.999117
hsa-miR-6762-5p	0.350523	4.21807	3.73497	2.12944	5.0727	1.59094	0.669876	0.582235	0.999117
hsa-miR-4489	3.60538	7.60294	13.0384	5.39458	9.93404	1.68053	0.748916	0.441674	0.999117
hsa-miR-4283	3.50523	6.50937	5.43268	0.461379	8.03178	-1.08255	-0.114439	0.918578	0.999117
hsa-miR-185-3p	6.20927	5.57202	5.90804	3.44259	17.1204	1.49242	0.577655	0.567569	0.999117
hsa-miR-625-5p	37.7063	21.7673	48.8941	35.8456	18.5294	1.15769	0.21125	0.797436	0.999117
hsa-miR-4723-5p	8.41256	6.92597	8.0132	5.50105	7.04542	-1.13957	-0.188488	0.82782	0.999117
hsa-miR-4525	0.801196	3.1245	1.5619	1.77453	14.3727	2.99526	1.58268	0.165842	0.999117
hsa-miR-1237-5p	4.25635	1.97885	8.7602	8.34031	4.79088	2.34135	1.22734	0.173483	0.999117
hsa-miR-6846-5p	2.10314	1.40602	1.76562	0.0354907	0.493179	-2.32051	-1.21444	0.425969	0.999117
hsa-miR-328-5p	2.70404	8.64444	10.8654	5.60753	0.422725	-1.0073	-0.0104884	0.992336	0.999117
hsa-miR-6835-5p	6.96039	0.6249	0.47536	1.10021	9.79313	-1.00308	-0.00444157	0.997252	0.999117
hsa-miR-6752-5p	1.15172	2.18715	0.882811	7.87893	1.62045	2.08537	1.0603	0.37327	0.999117
hsa-miR-7704	9.21375	26.2458	7.67366	12.0313	37.5521	1.07575	0.105347	0.899493	0.999117
hsa-miR-342-5p	103.454	108.993	69.6741	37.4781	42.1316	-2.13694	-1.09555	0.183352	0.999117
hsa-miR-6747-5p	1462.28	2522.93	647.779	927.407	995.236	-2.32556	-1.21758	0.139421	0.999117
hsa-miR-193b-5p	32.4985	13.0187	19.4218	20.9395	21.9112	-1.09661	-0.133057	0.865409	0.999117
hsa-miR-197-5p	3.25486	3.80147	9.09974	0.212944	12.8227	2.08578	1.06059	0.324192	0.999117
hsa-miR-503-3p	17.426	10.9878	36.6027	2.02297	7.89087	1.09039	0.12484	0.902863	0.999117
hsa-miR-193a-5p	135.102	89.7772	67.2973	192.075	121.393	1.12919	0.175284	0.826269	0.999117
hsa-miR-6756-5p	2.50374	4.47845	0.746994	2.44886	7.04542	-1.02527	-0.0360044	0.97571	0.999117
hsa-miR-1293	29.6442	23.1734	19.4897	29.8122	82.0791	1.65737	0.728893	0.395326	0.999117
hsa-miR-6772-5p	11.3169	9.21727	3.05588	17.5679	14.5136	1.14244	0.192125	0.842561	0.999117
hsa-miR-4455	78.8177	27.808	31.7812	31.9061	171.838	1.47221	0.557981	0.540942	0.999117
hsa-miR-23a-5p	10.716	36.4525	15.1436	16.6806	12.7522	-1.58569	-0.665109	0.401854	0.999117
hsa-miR-12130	11.417	11.5606	7.60575	8.87267	22.0522	1.1153	0.157431	0.862712	0.999117
hsa-miR-629-5p	18.0269	15.1538	4.88941	8.09187	10.6386	-2.1064	-1.07478	0.214387	0.999117
hsa-miR-4650-3p	32.148	23.6941	20.7121	17.071	0	-2.21591	-1.1479	0.313509	0.999117
hsa-miR-3529-5p	2999.78	3641.29	4698.86	2311.83	2268.91	-1.07351	-0.102331	0.906907	0.999117
hsa-miR-4451	47.0202	30.6722	33.8184	25.8727	123.224	1.56882	0.649683	0.437237	0.999117
hsa-miR-5681b	5.70852	3.7494	0.543268	9.19208	8.4545	1.28343	0.360008	0.710922	0.999117
hsa-miR-4281	5.25785	7.08219	7.1983	7.66598	13.9499	1.54996	0.632234	0.478927	0.999117
hsa-miR-412-5p	61.9925	78.2166	90.1825	49.2256	58.5474	-1.06334	-0.0886015	0.914607	0.999117
hsa-miR-9901	4.70703	4.47845	2.03726	6.49479	5.70679	1.03983	0.0563439	0.959221	0.999117
hsa-miR-601	242.161	201.426	320.936	145.121	72.3564	-1.23587	-0.305521	0.726006	0.999117
hsa-miR-4527	2.90434	1.92677	0.882811	2.16493	1.40908	-1.56736	-0.648333	0.603287	0.999117
hsa-miR-4710	1.95292	1.35395	3.93869	1.17119	0.281817	1.08256	0.114446	0.93606	0.999117
hsa-miR-3085-5p	6.50972	15.4142	2.30889	8.94365	13.9499	-1.30446	-0.383458	0.682839	0.999117
hsa-miR-4466	15.7735	7.55087	2.64843	9.93739	26.2794	1.11007	0.150651	0.875955	0.999117
hsa-miR-3907	2.10314	4.11392	0.0679085	0.141963	6.90451	-1.31388	-0.393833	0.788539	0.999117
hsa-miR-8071	9.81465	20.7258	21.2554	3.33612	0.915904	-1.79683	-0.845457	0.421677	0.999117
hsa-miR-6880-5p	18.077	22.0798	4.27824	47.2381	44.0339	1.58659	0.665929	0.453016	0.999117
hsa-miR-3165	405.355	546.839	412.748	244.46	324.301	-1.45552	-0.541533	0.534042	0.999117
hsa-miR-541-3p	231.095	146.903	177.784	217.061	179.376	1.013	0.0186396	0.981813	0.999117
hsa-miR-92a-2-5p	4.5568	9.99839	1.76562	3.08769	18.3181	1.05956	0.0834655	0.940456	0.999117
hsa-miR-6769a-5p	3.05456	6.50937	6.04386	4.15241	6.05906	1.12625	0.171522	0.868212	0.999117
hsa-miR-323a-5p	92.8887	72.228	91.8123	38.0815	49.6702	-1.38028	-0.464962	0.570631	0.999117
hsa-miR-876-3p	10.6659	12.2897	6.72294	6.0689	53.9679	1.93689	0.953739	0.297068	0.999117
hsa-miR-3650	2.10314	1.82262	0.882811	6.53028	6.19997	2.31317	1.20987	0.296595	0.999117
hsa-miR-4694-5p	0.150224	0.10415	1.5619	0.0709813	0	4.06287	2.0225	0.240483	0.999117
hsa-miR-409-5p	9.61435	5.93655	14.2608	10.0793	0.493179	1.065	0.0908536	0.934572	0.999117
hsa-miR-182-3p	22.1831	9.63387	0.611177	25.7662	52.7702	1.65798	0.729427	0.519383	0.999117
hsa-miR-597-3p	0.450673	1.61432	3.53124	2.23591	4.43861	3.26299	1.7062	0.196056	0.999117
hsa-miR-152-5p	6.05904	6.40522	0.746994	8.41129	6.19997	-1.21347	-0.279142	0.76218	0.999117
hsa-miR-380-5p	12.0179	6.249	7.06249	14.0188	0.774996	-1.25054	-0.322555	0.760058	0.999117
hsa-miR-656-5p	5.45815	5.31165	1.22235	2.48435	3.87498	-2.1331	-1.09295	0.33448	0.999117
hsa-miR-92a-1-5p	22.9843	13.0708	16.298	20.6556	21.559	1.08222	0.113995	0.884014	0.999117
hsa-miR-323b-5p	113.069	133.52	104.036	79.4281	65.1701	-1.48779	-0.573168	0.477389	0.999117
hsa-miR-299-5p	11.7676	16.6119	22.2061	9.72444	31.4226	1.48495	0.570414	0.476392	0.999117
hsa-miR-5087	3.10463	2.34337	1.35817	8.34031	7.46814	2.10311	1.07252	0.343329	0.999117
hsa-miR-30a-5p	7148.17	3524.28	6067.15	3964.98	3115.69	-1.21759	-0.284033	0.747223	0.999117
hsa-miR-194-5p	12.6188	4.94712	10.4579	1.02923	9.29995	-1.27086	-0.345801	0.730959	0.999117
hsa-miR-6832-5p	4.30643	3.64525	5.5685	2.44886	6.69315	1.21873	0.285373	0.781539	0.999117
hsa-miR-4732-5p	20.6308	9.52972	14.5324	12.1733	28.3226	1.21403	0.279808	0.714206	0.999117
hsa-miR-3935	3.30493	0.364525	0.746994	2.20042	0.140908	-1.75402	-0.810669	0.59552	0.999117
hsa-miR-376a-2-5p	7.06054	0.052075	0.135817	0.0709813	3.94543	-2.57174	-1.36275	0.398148	0.999117
hsa-miR-8065	17.4761	17.9138	15.4831	8.97914	7.04542	-1.68775	-0.755104	0.392922	0.999117
hsa-miR-6806-5p	8.81316	2.55167	3.25961	10.1503	3.59316	1.00217	0.0031311	0.997193	0.999117
hsa-miR-6073	2.45366	1.77055	0.135817	2.12944	5.49543	1.222	0.289246	0.831806	0.999117
hsa-miR-142-3p	21.5822	51.0335	26.009	15.8288	11.0613	-2.0592	-1.04208	0.265096	0.999117
hsa-miR-3713	0.300448	3.17657	0.814902	1.24217	0.915904	-1.73722	-0.796777	0.589212	0.999117
hsa-miR-567	2.55381	4.27015	2.3768	0.141963	4.1568	-1.5422	-0.624992	0.644079	0.999117
hsa-miR-630	12.7691	7.39464	5.84013	10.8247	9.08859	-1.16914	-0.225445	0.790203	0.999117
hsa-miR-505-3p	15.5732	25.0481	22.1382	22.856	18.3885	1.04241	0.0599164	0.934557	0.999117
hsa-miR-12122	5.30792	2.39545	3.59915	0.212944	0.0704542	-2.98217	-1.57636	0.277544	0.999117
hsa-miR-6879-3p	1.65247	0.260375	4.41405	2.09395	0.0704542	2.2818	1.19017	0.434128	0.999117
hsa-miR-668-3p	15.6734	16.8723	16.5697	6.53028	8.17268	-1.56672	-0.647749	0.478713	0.999117
hsa-miR-4697-3p	13.1697	18.747	21.0516	6.17538	10.0749	-1.28663	-0.363601	0.687214	0.999117
hsa-miR-616-3p	0	0.156225	0.271634	1.34865	0	6.58429	2.71903	0.117897	0.999117
hsa-miR-198	0.0500747	1.97885	0.0679085	1.27766	0.0704542	-2.08491	-1.05998	0.541342	0.999117
hsa-miR-4433a-5p	4.65695	12.0293	9.91464	9.72444	0.563633	-1.23713	-0.307	0.774028	0.999117
hsa-miR-4449	17.5762	11.092	3.59915	12.1023	19.5158	-1.22113	-0.288216	0.749156	0.999117
hsa-miR-3909	9.66443	9.47764	13.1063	11.8894	1.6909	-1.07448	-0.103632	0.911741	0.999117
hsa-miR-489-5p	0.150224	0.4166	0.339543	0.141963	0	-1.751	-0.808181	0.601829	0.999117
hsa-miR-4440	9.3139	14.0602	4.95732	3.90397	16.3454	-1.39487	-0.480131	0.592721	0.999117
hsa-miR-934	3.60538	1.09357	0.0679085	2.6618	6.55224	1.31456	0.394583	0.773475	0.999117
hsa-miR-8078	381.419	195.958	486.972	227.921	216.858	1.07576	0.105356	0.892732	0.999117
hsa-miR-4796-5p	0.350523	1.35395	0.407451	5.3236	0.211363	2.33431	1.223	0.399372	0.999117
hsa-miR-6895-3p	0.350523	2.65582	4.41405	3.01671	0.211363	1.69421	0.760614	0.593652	0.999117
hsa-miR-593-3p	3.85576	11.4565	7.46994	6.24636	0.563633	-1.60518	-0.682732	0.483677	0.999117
hsa-miR-346	16.9253	73.8944	3.25961	27.8957	23.9544	-2.47013	-1.30459	0.14879	0.999117
hsa-miR-200c-5p	0.400598	1.09357	2.30889	0.993739	0.493179	1.68127	0.74955	0.613815	0.999117
hsa-miR-6740-3p	7.21076	1.0415	8.82811	2.23591	5.35452	1.32187	0.402585	0.712556	0.999117
hsa-miR-431-5p	505.855	468.831	417.162	413.573	215.308	-1.39749	-0.482843	0.584257	0.999117
hsa-miR-1257	0.200299	2.86412	1.90144	5.39458	0.281817	1.65429	0.726213	0.61891	0.999117
hsa-miR-4504	1.20179	0.10415	0.746994	0.0709813	0	-2.40707	-1.26728	0.432354	0.999117
hsa-miR-542-3p	0.95142	0.260375	2.58052	2.69729	2.18408	4.10491	2.03735	0.113939	0.999117
hsa-miR-7973	2.25336	1.92677	0.543268	3.47809	3.73407	1.241	0.3115	0.808359	0.999117
hsa-miR-134-5p	96.2437	75.1442	102.406	55.1525	48.3316	-1.24911	-0.320904	0.692583	0.999117
hsa-miR-4316	15.1726	6.76975	1.29026	6.88519	14.6545	-1.44215	-0.528219	0.572799	0.999117
hsa-miR-1294	18.0269	13.904	23.1568	16.6451	10.4272	1.04876	0.0686913	0.931026	0.999117
hsa-miR-3689a-5p	0.100149	1.2498	0.0679085	0.0709813	2.18408	1.13568	0.183551	0.915588	0.999117
hsa-miR-19a-3p	72.358	67.7495	88.2811	46.9896	54.7429	-1.10708	-0.146762	0.855482	0.999117
hsa-miR-3944-5p	6.96039	2.75997	3.12379	2.02297	5.70679	-1.35406	-0.437292	0.688206	0.999117
hsa-miR-143-5p	0.0500747	3.69732	4.61778	5.50105	0.0704542	1.81214	0.857693	0.560842	0.999117
hsa-miR-1227-3p	17.6263	9.94632	17.8599	25.8727	5.91815	1.20239	0.265909	0.752126	0.999117
hsa-miR-1271-3p	7.51121	10.6233	11.3407	15.4739	0.281817	-1.00287	-0.00413966	0.996791	0.999117
hsa-miR-933	0.200299	1.19772	1.35817	3.22965	0.140908	2.26481	1.17939	0.433187	0.999117
hsa-miR-636	20.08	26.4541	19.4218	9.97288	21.4181	-1.37889	-0.46351	0.54907	0.999117
hsa-miR-3190-3p	6.25934	6.30107	7.13039	10.6827	0.774996	-1.01081	-0.0155175	0.988208	0.999117
hsa-miR-3138	3.15471	1.40602	1.83353	0.0709813	0.140908	-3.36827	-1.75201	0.244688	0.999117
hsa-miR-4800-5p	4.7571	0.260375	3.80288	8.16285	0.281817	1.62873	0.703746	0.591498	0.999117
hsa-miR-376b-5p	0.701046	1.8747	1.5619	1.49061	0.140908	-1.19617	-0.258418	0.862602	0.999117
hsa-miR-3691-5p	0.300448	4.27015	2.17307	2.59082	11.2022	2.32211	1.21544	0.276035	0.999117
hsa-miR-8056	5.5583	23.59	11.137	17.4969	0.0704542	-1.52177	-0.605748	0.608714	0.999117
hsa-miR-891a-3p	0.350523	2.96827	0.47536	0.106472	4.79088	1.07396	0.102945	0.943968	0.999117
hsa-miR-663b	3.40508	3.9577	6.79085	2.02297	10.9909	1.78302	0.834327	0.420775	0.999117
hsa-miR-4648	3.10463	0.260375	0.47536	0.0709813	9.79313	2.03961	1.02829	0.495047	0.999117
hsa-miR-1233-5p	9.7145	8.01954	4.41405	11.2151	10.0045	-1.03353	-0.0475835	0.954657	0.999117
hsa-miR-4654	7.26084	32.2865	2.85216	22.8915	20.8544	-1.27216	-0.34728	0.705187	0.999117
hsa-miR-491-5p	3.30493	15.4663	6.72294	5.714	19.8681	1.14579	0.196343	0.836861	0.999117
hsa-miR-3151-5p	4.80718	1.2498	1.76562	0.887267	0.493179	-2.88934	-1.53074	0.245857	0.999117
hsa-miR-4447	7.76159	7.96747	5.5685	5.35909	17.1908	1.18786	0.248366	0.780541	0.999117
hsa-miR-6742-5p	4.20628	4.00977	0.679085	5.28811	3.59316	-1.2799	-0.356027	0.758224	0.999117
hsa-miR-6748-5p	5.95889	5.46787	2.58052	3.7975	9.51131	-1.08307	-0.115131	0.903548	0.999117
hsa-miR-6793-5p	12.719	4.84297	16.0264	19.4844	25.434	2.31063	1.20829	0.123539	0.999117
hsa-miR-4536-5p	200.499	201.009	278.832	160.169	207.558	1.0731	0.101784	0.898297	0.999117
hsa-miR-203a-5p	4.45665	4.3743	4.34614	9.5115	12.4704	1.98711	0.990674	0.299068	0.999117
hsa-miR-3177-5p	1.80269	0.156225	0.0679085	1.9165	0.140908	-1.35466	-0.437928	0.792721	0.999117
hsa-miR-223-5p	0.350523	2.23922	0.543268	1.88101	0	-1.5754	-0.655718	0.689301	0.999117
hsa-miR-597-5p	1.50224	1.77055	1.90144	0.0354907	0.211363	-2.30421	-1.20427	0.448375	0.999117
hsa-miR-3657	4.1562	1.40602	4.41405	4.1879	0.211363	1.05848	0.0819923	0.951451	0.999117
hsa-miR-4669	7.71151	0.31245	0.339543	5.74949	8.31359	1.19628	0.258554	0.836113	0.999117
hsa-miR-4711-3p	6.55979	1.14565	1.35817	9.9019	1.97272	1.14958	0.201104	0.855723	0.999117
hsa-miR-3911	1.85277	2.03092	3.25961	2.69729	0	1.0244	0.034782	0.980096	0.999117
hsa-miR-644a	10.5658	24.6835	4.14242	11.7119	34.5225	-1.0501	-0.0705239	0.936716	0.999117
hsa-miR-10401-5p	3.40508	0.52075	1.6298	1.10021	3.09998	-1.01827	-0.0261163	0.984279	0.999117
hsa-miR-6867-5p	14.1712	11.4044	11.6124	14.4802	13.2454	1.03399	0.0482158	0.956038	0.999117
hsa-miR-124-5p	3.15471	5.93655	2.51262	18.6681	6.7636	2.05412	1.03852	0.289033	0.999117
hsa-miR-1258	18.1271	21.4549	9.23556	21.7913	36.4248	1.13578	0.183678	0.835362	0.999117
hsa-miR-1206	7.11061	3.80147	0.746994	4.01045	9.65222	-1.13715	-0.185425	0.864653	0.999117
hsa-miR-6853-3p	13.1196	10.8316	11.5444	13.6284	10.9204	1.01731	0.0247642	0.978153	0.999117
hsa-miR-642b-5p	1.65247	0.833199	2.64843	7.09813	0.140908	2.65345	1.40787	0.309005	0.999117
hsa-miR-4326	16.4245	8.85274	7.33412	13.6639	17.7545	1.02203	0.0314337	0.971358	0.999117
hsa-miR-2116-5p	12.9694	7.86332	4.48196	5.14615	28.2521	1.21035	0.27542	0.783477	0.999117
hsa-miR-22-5p	99.9492	79.6747	79.0455	61.4343	32.6907	-1.55551	-0.637387	0.449999	0.999117
hsa-miR-4684-3p	2.95441	0.156225	2.64843	1.56159	0.563633	1.02222	0.0317057	0.983439	0.999117
hsa-miR-6501-5p	8.61286	7.39464	13.7854	6.31734	9.44086	1.22221	0.289491	0.741196	0.999117
hsa-miR-4423-5p	11.2167	6.40522	32.5961	3.08769	3.52271	1.4815	0.567055	0.564365	0.999117
hsa-miR-4425	22.5336	39.5249	39.2511	25.9082	39.1725	1.11917	0.162433	0.842804	0.999117
hsa-miR-3147	2.40359	4.7909	5.63641	9.75993	1.12727	1.53652	0.619666	0.586178	0.999117
hsa-miR-3613-5p	324.935	341.143	443.714	223.84	76.6541	-1.34253	-0.42495	0.609788	0.999117
hsa-miR-6755-3p	14.8722	10.5191	27.5709	10.3278	2.81817	1.06859	0.0957144	0.923577	0.999117
hsa-miR-5705	2.20329	0.468675	4.07451	2.51984	0.634088	1.79904	0.847227	0.520971	0.999117
hsa-miR-6740-5p	7.21076	0.4166	1.90144	7.31108	6.41133	1.36592	0.44987	0.706973	0.999117
hsa-miR-8068	7.76159	7.18634	0.611177	24.879	10.1454	1.59064	0.669609	0.524956	0.999117
hsa-miR-2052	2.95441	0.989424	0.135817	0.993739	7.96132	1.53054	0.614042	0.656374	0.999117
hsa-miR-9-3p	1.50224	4.166	3.1917	5.53654	6.55224	1.79896	0.847161	0.41581	0.999117
hsa-miR-3143	0.400598	2.18715	4.41405	5.28811	0.422725	2.60906	1.38353	0.29424	0.999117
hsa-miR-4764-3p	0.450673	2.13507	1.01863	1.81002	0	-1.35513	-0.438427	0.783306	0.999117
hsa-miR-208a-3p	1.90284	0.260375	0.203726	4.68477	0.281817	1.6022	0.68005	0.646152	0.999117
hsa-miR-499a-5p	13.37	13.2791	8.62438	3.51358	7.74996	-2.02819	-1.02019	0.231344	0.999117
hsa-miR-6892-5p	10.5658	21.559	3.87079	19.6618	88.9132	2.33248	1.22186	0.216188	0.999117
hsa-miR-889-3p	210.164	270.217	289.698	127.27	191.213	-1.18511	-0.245019	0.758636	0.999117
hsa-miR-155-5p	2523.32	1820.23	2334.69	2206.53	939.436	-1.18877	-0.249466	0.772061	0.999117
hsa-miR-4775	64.1958	32.0261	57.5864	31.1963	4.72043	-1.54346	-0.626172	0.510582	0.999117
hsa-miR-520d-5p	1.55232	1.82262	1.76562	1.31315	0.352271	-1.4562	-0.542209	0.704564	0.999117
hsa-miR-3941	1.80269	8.22784	3.53124	4.15241	3.87498	-1.29913	-0.377544	0.718211	0.999117
hsa-miR-466	0.250374	2.7079	1.76562	2.41337	0.0704542	-1.03814	-0.0540078	0.971645	0.999117
hsa-miR-582-5p	14.8722	35.2547	46.7211	7.20461	3.52271	-1.30931	-0.388804	0.681598	0.999117
hsa-miR-4666a-5p	0.300448	2.23922	0.407451	2.41337	0	-1.3322	-0.413815	0.798788	0.999117
hsa-miR-5591-3p	0.701046	2.18715	1.83353	2.6618	3.3818	1.81801	0.862361	0.491319	0.999117
hsa-miR-6798-3p	8.36248	3.9577	2.51262	8.02089	1.90226	-1.47281	-0.558573	0.595174	0.999117
hsa-miR-7848-3p	5.45815	6.30107	6.3834	6.56577	0.493179	-1.30847	-0.387885	0.744782	0.999117
hsa-miR-4724-3p	4.45665	0.260375	0.203726	2.98122	3.17044	-1.11157	-0.152604	0.912634	0.999117
hsa-miR-4788	2.05306	1.92677	3.12379	3.26514	10.1454	2.74961	1.45923	0.159516	0.999117
hsa-miR-4693-5p	5.25785	3.59317	0.203726	2.83925	0.211363	-3.98075	-1.99304	0.138985	0.999117
hsa-miR-3682-5p	0.200299	2.81205	1.5619	1.95199	0.281817	-1.18111	-0.24014	0.873397	0.999117
hsa-miR-3684	1.40209	1.51017	0.339543	1.41963	5.00225	1.53861	0.62163	0.643493	0.999117
hsa-miR-151a-3p	167.099	102.848	183.149	107.395	49.0361	-1.19243	-0.253899	0.752855	0.999117
hsa-miR-877-5p	21.1315	20.3092	6.99458	31.1963	40.8634	1.27192	0.347006	0.712744	0.999117
hsa-miR-6866-5p	0.100149	2.55167	3.05588	0.141963	0.0704542	-1.22099	-0.288046	0.86106	0.999117
hsa-miR-376a-5p	0.0500747	1.56225	5.70432	1.1357	1.83181	3.55851	1.83127	0.185132	0.999117
hsa-miR-4766-3p	1.45217	0.10415	0.135817	1.1357	0.0704542	-1.67922	-0.747788	0.656959	0.999117
hsa-miR-585-5p	0.300448	2.18715	0.543268	1.27766	3.73407	1.48161	0.56717	0.67924	0.999117
hsa-miR-5682	1003.4	1162.42	1765.49	658.103	448.229	-1.13126	-0.177929	0.83563	0.999117
hsa-miR-4524a-5p	43.2145	24.4232	9.64301	33.6806	89.4063	1.30791	0.387266	0.673689	0.999117
hsa-miR-4662a-5p	8.31241	15.4663	2.71634	9.65346	4.93179	-2.04624	-1.03297	0.258187	0.999117
hsa-miR-4321	21.3318	32.0782	16.4339	29.6347	42.8361	1.10961	0.150058	0.854238	0.999117
hsa-miR-5579-3p	259.688	148.309	323.72	126.56	64.0428	-1.18996	-0.250919	0.766838	0.999117
hsa-miR-3117-3p	3.65546	5.78032	4.0066	3.47809	0.0704542	-1.86686	-0.900616	0.474828	0.999117
hsa-miR-4266	0.350523	11.9772	1.01863	7.73697	15.7113	1.32269	0.403477	0.743924	0.999117
hsa-miR-5704	0.650972	4.166	2.85216	3.19416	2.32499	1.16166	0.216187	0.865425	0.999117
hsa-miR-1295a	5.05755	2.083	1.15444	0.53236	2.67726	-2.49078	-1.3166	0.29854	0.999117
hsa-miR-12116	0.300448	2.23922	2.64843	2.02297	3.24089	2.06748	1.04787	0.433998	0.999117
hsa-miR-3162-5p	3.40508	1.92677	1.49399	5.57204	0.140908	-1.10156	-0.139542	0.919505	0.999117
hsa-miR-1296-5p	24.0359	18.5908	23.768	12.2443	18.0363	-1.18774	-0.248222	0.745903	0.999117
hsa-miR-6824-5p	0.300448	2.03092	0.271634	3.69103	0.422725	1.2679	0.342436	0.816336	0.999117
hsa-miR-6789-5p	1.35202	9.06104	0.950719	8.48227	24.5885	2.17606	1.12172	0.296487	0.999117
hsa-miR-4278	0.200299	0.2083	0.0679085	2.30689	0.211363	4.19889	2.07001	0.224399	0.999117
hsa-miR-331-5p	2.80419	2.86412	1.5619	1.56159	0	-2.69251	-1.42895	0.305685	0.999117
hsa-miR-6800-5p	1.70254	1.77055	1.76562	4.68477	4.64998	2.14141	1.09856	0.332189	0.999117
hsa-miR-6802-5p	3.15471	2.13507	2.30889	9.36954	11.9772	2.97753	1.57412	0.122595	0.999117
hsa-miR-4540	0.650972	3.07242	1.49399	6.13989	8.73632	2.92684	1.54935	0.161123	0.999117
hsa-miR-4474-5p	1.15172	3.48902	0.135817	1.38414	0.0704542	-4.18073	-2.06375	0.178365	0.999117
hsa-miR-3606-5p	2.35351	0.4166	3.46333	2.48435	0.140908	1.46454	0.550449	0.69477	0.999117
hsa-miR-921	17.5262	8.80067	1.5619	16.3257	31.0703	1.23945	0.309704	0.732018	0.999117
hsa-miR-4671-3p	0.701046	0.676975	1.22235	0.425888	5.0727	3.20228	1.6791	0.241002	0.999117
hsa-miR-4473	5.45815	3.5411	6.11177	4.22339	3.73407	1.03597	0.0509776	0.959702	0.999117
hsa-miR-4727-3p	6.86024	10.6754	3.66706	7.41755	5.21361	-1.59542	-0.673937	0.450657	0.999117
hsa-miR-4460	29.5441	13.5916	45.0913	39.7495	28.5339	1.75203	0.809031	0.305302	0.999117
hsa-miR-340-5p	35.9537	24.4232	29.2007	18.881	5.28406	-1.69642	-0.762491	0.340117	0.999117
hsa-miR-374a-5p	52.8289	69.9367	107.703	33.3967	26.3499	-1.10003	-0.137541	0.869946	0.999117
hsa-let-7a-3p	1828.03	2169.96	3341.51	1247.6	531.295	-1.1712	-0.227986	0.803009	0.999117
hsa-miR-4789-5p	0.801196	0.052075	1.69771	2.76827	0.140908	3.57232	1.83686	0.22581	0.999117
hsa-let-7f-2-3p	23.3348	23.642	34.4296	19.7328	6.41133	-1.16318	-0.218079	0.781165	0.999117
hsa-miR-3144-3p	0.250374	3.28072	1.01863	0.0709813	0	-4.85223	-2.27865	0.188583	0.999117
hsa-let-7d-3p	216.473	211.528	306.199	198.073	35.9316	-1.18841	-0.24903	0.785356	0.999117
hsa-let-7e-3p	328.891	309.221	457.024	223.272	133.933	-1.17559	-0.233388	0.769822	0.999117
hsa-miR-190a-3p	1.45217	1.09357	0.203726	1.59708	0.0704542	-1.95971	-0.970641	0.528052	0.999117
hsa-miR-361-5p	127.09	126.855	131.946	115.167	54.4611	-1.26277	-0.336595	0.667111	0.999117
hsa-miR-9903	2.85426	1.8747	2.98797	1.9165	2.04317	-1.04485	-0.0633012	0.95959	0.999117
hsa-miR-4633-5p	4.40658	6.0407	1.90144	7.48853	7.5386	1.08338	0.115542	0.89772	0.999117
hsa-miR-8074	1.40209	0.260375	0.135817	1.63257	1.12727	1.17179	0.228713	0.880239	0.999117
hsa-miR-3115	4.3565	2.60375	0.679085	9.22757	0.0704542	-1.04214	-0.0595462	0.965051	0.999117
hsa-miR-584-5p	86.7795	54.0538	50.9993	123.933	138.442	1.48354	0.569042	0.476806	0.999117
hsa-miR-3924	3.60538	4.73882	0.47536	2.73278	0	-3.83295	-1.93846	0.195079	0.999117
hsa-miR-4477a	4.00598	3.48902	1.69771	5.35909	0	-1.58446	-0.663987	0.619488	0.999117
hsa-miR-556-3p	7.11061	6.40522	1.49399	12.5282	14.3727	1.40116	0.486621	0.595968	0.999117
hsa-miR-12123	0.650972	2.44752	4.27824	0.567851	0	1.04003	0.0566192	0.971772	0.999117
hsa-miR-137-3p	47.4709	37.6502	45.4987	41.0627	10.2159	-1.31865	-0.399056	0.649062	0.999117
hsa-miR-5701	17.9268	15.4142	9.37137	9.1211	12.3999	-1.63664	-0.710739	0.411383	0.999117
hsa-miR-6715b-3p	0.450673	3.43695	0.339543	4.43633	4.93179	1.66516	0.735662	0.565245	0.999117
hsa-miR-3671	3.70553	4.47845	2.98797	3.01671	0.422725	-1.89286	-0.920567	0.467754	0.999117
hsa-miR-7159-5p	3.40508	2.34337	1.83353	6.81421	10.3568	2.20084	1.13805	0.238177	0.999117
hsa-miR-421	7.06054	3.7494	16.8413	2.41337	4.72043	1.4744	0.560126	0.536743	0.999117
hsa-miR-95-3p	2.65396	1.35395	2.85216	1.38414	0.352271	-1.31076	-0.390399	0.775729	0.999117
hsa-miR-561-5p	7.21076	2.86412	8.21693	14.2318	5.14315	1.83072	0.872411	0.406728	0.999117
hsa-miR-1297	16515.2	15517.4	23239.2	10361.5	5581.73	-1.22629	-0.294295	0.691639	0.999117
hsa-miR-513b-5p	3.90583	2.34337	2.30889	2.12944	3.52271	-1.19882	-0.261615	0.836219	0.999117
hsa-miR-377-3p	38.3573	19.3198	49.8448	22.998	26.7726	1.15029	0.201999	0.805653	0.999117
hsa-miR-513a-5p	22.9843	21.8715	42.4428	12.6702	15.4295	1.04719	0.0665292	0.931945	0.999117
hsa-miR-27a-3p	19764.3	20384.4	29554.1	12653.8	12562.5	-1.09955	-0.136918	0.847897	0.999117
hsa-miR-23a-3p	6543.97	7281.85	10570.6	5063.31	2596.02	-1.13762	-0.186016	0.837932	0.999117
hsa-miR-197-3p	362.291	263.291	457.975	332.157	157.888	1.0103	0.0147862	0.984824	0.999117
hsa-miR-6802-3p	1.95292	2.65582	0.679085	1.63257	9.08859	1.64195	0.715411	0.555313	0.999117
hsa-miR-6794-3p	1.65247	0.572825	0.746994	3.19416	0.211363	1.26088	0.334435	0.824005	0.999117
hsa-miR-181b-2-3p	3.90583	3.90562	0.746994	3.30063	7.46814	-1.0191	-0.0272991	0.980414	0.999117
hsa-miR-653-3p	1.20179	3.22865	2.51262	5.03967	7.74996	2.29931	1.2012	0.245049	0.999117
hsa-miR-5100	19.0785	23.1213	10.7295	18.4197	44.3157	1.15976	0.213821	0.821368	0.999117
hsa-miR-4291	1.05157	2.75997	2.30889	4.22339	3.31135	1.73701	0.796606	0.522521	0.999117
hsa-miR-3157-5p	33.0994	42.4411	34.158	21.1169	51.1497	-1.06642	-0.092772	0.912536	0.999117
hsa-miR-12128	1.80269	5.51995	0.271634	3.22965	0	-3.09306	-1.62903	0.273765	0.999117
hsa-miR-11399	80.8707	110.139	59.6916	58.5241	73.7655	-1.49372	-0.578911	0.463136	0.999117
hsa-miR-222-5p	6.00897	8.90482	6.45131	6.4593	21.1363	1.51815	0.602315	0.503612	0.999117
hsa-miR-4276	12.1682	11.5086	13.1743	2.41337	13.3158	-1.23244	-0.301522	0.738654	0.999117
hsa-miR-485-3p	125.988	74.1027	103.085	69.6327	34.0998	-1.45112	-0.537168	0.516132	0.999117
hsa-miR-376a-3p	1381.11	1464.87	2025.3	1055.6	436.745	-1.21359	-0.279279	0.746437	0.999117
hsa-miR-5007-3p	7.51121	1.30187	4.88941	7.09813	11.5545	1.77764	0.829962	0.405294	0.999117
hsa-miR-7154-5p	0.701046	1.4581	1.15444	1.66806	0.140908	-1.07128	-0.0993335	0.947265	0.999117
hsa-miR-433-3p	37.9066	21.559	13.1743	28.9959	18.0363	-1.47773	-0.563383	0.54213	0.999117
hsa-miR-6516-3p	21.1816	15.5704	25.8052	12.1733	4.01589	-1.31292	-0.392777	0.685424	0.999117
hsa-miR-1298-5p	1.20179	0.52075	0.814902	2.62631	0	1.34265	0.425087	0.789111	0.999117
hsa-miR-1912-5p	2.05306	1.19772	3.12379	1.70355	8.73632	2.7566	1.46289	0.210415	0.999117
hsa-miR-5696	2.65396	2.39545	5.70432	6.03341	0.140908	1.56968	0.650471	0.61638	0.999117
hsa-miR-579-3p	5.1577	3.38487	11.884	4.32986	7.25678	1.81981	0.863787	0.296917	0.999117
hsa-miR-6509-3p	4.50673	2.65582	8.69229	4.64928	4.01589	1.60747	0.684788	0.49181	0.999117
hsa-miR-6512-3p	14.7721	13.227	9.09974	5.00418	5.63633	-2.14722	-1.10247	0.190233	0.999117
hsa-miR-145-5p	287.729	158.464	236.118	105.301	164.229	-1.32396	-0.404864	0.63166	0.999117
hsa-miR-5581-3p	21.1315	41.5037	56.7715	17.6389	20.5022	1.00957	0.0137386	0.987181	0.999117
hsa-miR-188-3p	2.05306	2.96827	2.10516	5.53654	0.352271	1.07019	0.0978714	0.940489	0.999117
hsa-miR-1260a	6226.19	6168.38	2382.57	3725.1	3344.46	-1.96689	-0.975917	0.265154	0.999117
hsa-miR-3156-3p	954.325	522.416	749.099	664.74	981.074	1.08111	0.112512	0.890302	0.999117
hsa-miR-7977	301.901	252.095	76.1254	230.086	305.912	-1.35752	-0.440969	0.585199	0.999117
hsa-miR-2355-5p	8.11211	5.15542	4.27824	9.15659	9.51131	1.15566	0.208717	0.82963	0.999117
hsa-miR-6763-3p	61.642	44.4199	23.9717	38.9688	42.7657	-1.50417	-0.588964	0.471863	0.999117
hsa-miR-6826-3p	6.45964	3.22865	5.16105	13.8769	0.352271	1.3368	0.418779	0.706278	0.999117
hsa-miR-6883-3p	1.35202	3.43695	0.882811	3.01671	6.7636	1.48103	0.566601	0.623712	0.999117
hsa-miR-642a-5p	4.60688	7.70709	3.32752	7.09813	0.352271	-1.70374	-0.768705	0.497883	0.999117
hsa-miR-670-5p	18.3774	6.92597	14.6003	29.0314	22.8272	1.75205	0.809047	0.308862	0.999117
hsa-miR-623	6.76009	8.38407	6.99458	5.85596	17.9658	1.35183	0.434911	0.612563	0.999117
hsa-miR-6084	1.20179	1.14565	1.6298	0.248435	0.352271	-1.61371	-0.690383	0.659973	0.999117
hsa-miR-937-3p	11.2167	4.47845	4.48196	6.60126	10.2159	-1.10694	-0.146579	0.877416	0.999117
hsa-miR-572	0.751121	2.65582	2.64843	0.745304	1.33863	-1.09186	-0.126786	0.928841	0.999117
hsa-miR-4497	18.8782	17.2889	1.83353	4.40084	13.7386	-2.71976	-1.44348	0.130802	0.999117
hsa-miR-1468-5p	33.0493	31.6095	39.7265	15.332	12.1886	-1.44337	-0.529445	0.572272	0.999117
hsa-miR-155-3p	0.400598	2.75997	2.24098	3.08769	0.281817	1.19016	0.251151	0.853564	0.999117
hsa-miR-5571-3p	2.55381	1.19772	4.54987	3.26514	4.86134	2.21713	1.14869	0.30089	0.999117
hsa-miR-7975	1.65247	1.0415	1.69771	4.5783	3.94543	2.54171	1.3458	0.287843	0.999117
hsa-miR-337-3p	2936.03	2953.43	4657.03	2309.38	1347.86	-1.06254	-0.0875146	0.921345	0.999117
hsa-miR-202-5p	3.10463	1.30187	3.12379	2.09395	0.0704542	-1.24699	-0.318446	0.82123	0.999117
hsa-miR-4691-5p	8.81316	6.50937	5.29686	9.01463	14.7954	1.26441	0.338467	0.684354	0.999117
hsa-miR-6749-3p	33.9507	21.9756	13.5138	35.9166	50.5156	1.19137	0.252622	0.763505	0.999117
hsa-miR-7111-3p	5.60837	3.17657	2.30889	3.7975	9.44086	1.17554	0.233322	0.836767	0.999117
hsa-miR-6780a-3p	15.0224	16.5078	24.4471	50.9291	18.3181	1.98459	0.988838	0.259058	0.999117
hsa-miR-6881-3p	2.50374	3.38487	3.73497	2.55533	11.2022	1.96893	0.977412	0.349189	0.999117
hsa-miR-378a-5p	10.2152	8.54029	11.5444	6.99166	2.32499	-1.34785	-0.430657	0.661979	0.999117
hsa-miR-1200	24.9873	8.43614	13.8533	22.7495	43.8929	1.60455	0.682165	0.455598	0.999117
hsa-miR-1343-3p	8.01196	11.0399	5.02523	16.1483	9.2295	1.06885	0.096063	0.915446	0.999117
hsa-miR-6868-3p	8.46263	12.4459	9.23556	11.4635	10.1454	-1.00957	-0.0137409	0.986999	0.999117
hsa-miR-502-5p	2.65396	1.92677	2.3768	2.98122	1.90226	1.0942	0.129874	0.920048	0.999117
hsa-miR-4444	0.300448	2.13507	0.271634	8.16285	4.43861	3.51932	1.81529	0.161314	0.999117
hsa-miR-6788-3p	1.00149	0.468675	0.543268	1.41963	4.43861	2.8673	1.51969	0.278997	0.999117
hsa-miR-6726-3p	1.55232	0.4166	0.407451	0.354907	7.46814	2.76293	1.4662	0.306628	0.999117
hsa-miR-3124-5p	10.5157	4.5826	5.77222	7.2401	17.0499	1.32428	0.405213	0.635934	0.999117
hsa-miR-639	20.3804	18.9553	10.3221	26.6535	22.334	1.00723	0.0103934	0.98874	0.999117
hsa-miR-4790-5p	0.500747	4.11392	3.59915	4.11692	0.0704542	1.12726	0.172826	0.903198	0.999117
hsa-miR-4665-3p	225.987	51.5021	70.2853	99.3384	324.723	1.18756	0.247997	0.780678	0.999117
hsa-miR-1469	6.00897	10.8837	1.83353	13.9123	1.83181	-1.43437	-0.520414	0.628607	0.999117
hsa-miR-425-3p	26.5396	28.5371	38.9116	27.8957	25.7158	1.11829	0.16129	0.836869	0.999117
hsa-miR-6771-5p	5.00747	3.5411	0.407451	4.32986	5.42497	-1.25961	-0.332974	0.774292	0.999117
hsa-miR-3181	34.7519	9.68594	5.50059	24.0272	76.795	1.59452	0.673119	0.491414	0.999117
hsa-miR-4750-5p	10.716	6.249	5.02523	7.20461	13.2454	-1.00126	-0.00182017	0.998396	0.999117
hsa-miR-3944-3p	4.50673	2.083	0.950719	5.14615	3.66362	-1.00664	-0.00954802	0.993427	0.999117
hsa-miR-6727-5p	12.3184	7.55087	8.0132	4.72026	27.6885	1.35356	0.436762	0.658368	0.999117
hsa-miR-4798-5p	4.40658	0.10415	1.96935	1.56159	6.19997	1.43315	0.519194	0.7098	0.999117
hsa-miR-517a-3p	0.200299	0.2083	0.271634	0.106472	0.352271	1.02521	0.0359155	0.980988	0.999117
hsa-miR-3677-3p	10.1151	21.2466	8.7602	9.15659	34.8044	1.11946	0.162799	0.845331	0.999117
hsa-miR-4799-5p	0.100149	1.4581	1.35817	0.0354907	0	-1.68297	-0.751007	0.657939	0.999117
hsa-miR-518d-5p	12.4686	13.5916	3.80288	15.8288	36.9884	1.44771	0.533774	0.540899	0.999117
hsa-miR-4777-5p	6.45964	13.5916	2.3768	3.51358	33.9589	1.32355	0.404414	0.705617	0.999117
hsa-miR-1287-3p	3.00448	4.42637	3.1917	1.9165	5.35452	-1.07915	-0.109902	0.921747	0.999117
hsa-miR-513c-5p	0.801196	1.30187	0.611177	2.55533	2.6068	1.8407	0.880253	0.493654	0.999117
hsa-miR-1229-3p	28.5426	10.1025	13.1743	17.6034	4.50907	-1.63952	-0.713276	0.457736	0.999117
hsa-miR-515-5p	26.4395	33.328	9.50719	27.2923	47.3452	-1.06557	-0.0916198	0.912565	0.999117
hsa-miR-4713-5p	9.5142	9.73802	8.35275	2.62631	10.4272	-1.3565	-0.439891	0.66008	0.999117
hsa-miR-6867-3p	3.85576	3.85355	4.95732	5.74949	4.64998	1.36281	0.446586	0.656822	0.999117
hsa-miR-4279	6.60987	12.7584	8.28484	12.9541	15.2886	1.25824	0.331408	0.707677	0.999117
hsa-miR-516a-5p	0.200299	2.4996	0.203726	0.0354907	2.6068	-1.43088	-0.516904	0.753672	0.999117
hsa-miR-10399-3p	10.4656	9.26934	3.66706	7.70148	36.9884	1.63171	0.706383	0.483156	0.999117
hsa-miR-4684-5p	2.25336	0.10415	0.47536	2.16493	0.140908	-1.25365	-0.326138	0.840666	0.999117
hsa-miR-6873-3p	33.9507	13.4874	10.6616	14.4092	3.09998	-2.51913	-1.33293	0.159595	0.999117
hsa-miR-3191-5p	35.9537	36.2962	19.0823	22.714	73.6246	1.06435	0.0899686	0.916522	0.999117
hsa-miR-4753-3p	3.40508	3.1245	0.611177	1.88101	2.95908	-1.79482	-0.843838	0.529047	0.999117
hsa-miR-11181-5p	3.40508	1.61432	5.84013	1.34865	1.33863	1.12551	0.170585	0.898789	0.999117
hsa-miR-12119	4.10613	2.39545	3.32752	5.25262	17.6135	2.67654	1.42037	0.139064	0.999117
hsa-miR-3192-3p	33.6002	53.5331	14.1929	33.3967	152.604	1.53135	0.614802	0.513899	0.999117
hsa-miR-5001-3p	11.6674	5.4158	5.16105	17.213	2.53635	-1.02509	-0.03575	0.969881	0.999117
hsa-miR-6828-3p	0.350523	4.94712	1.35817	2.2714	5.00225	1.08472	0.117326	0.930052	0.999117
hsa-miR-6071	8.51271	1.71847	5.70432	4.50731	0.281817	-1.45998	-0.545946	0.651757	0.999117
hsa-miR-1299	1.95292	5.93655	2.51262	0	4.43861	-1.70586	-0.770495	0.600535	0.999117
hsa-miR-516b-5p	0.100149	2.65582	1.29026	0.0709813	11.3431	3.05907	1.61309	0.272623	0.999117
hsa-miR-4782-5p	6.05904	4.68675	5.77222	4.40084	3.80453	-1.16061	-0.214879	0.832843	0.999117
hsa-miR-4314	1.20179	2.81205	1.76562	4.08143	1.47954	1.23687	0.306694	0.819854	0.999117
hsa-miR-3686	2.70404	0.052075	0.339543	1.27766	0	-2.50304	-1.32368	0.442223	0.999117
hsa-miR-6888-3p	14.0209	8.22784	8.21693	18.4906	6.83405	1.00945	0.0135638	0.987583	0.999117
hsa-miR-526b-5p	2.40359	0.885274	7.06249	2.80376	0	1.99484	0.996271	0.511886	0.999117
hsa-miR-6844	9.7145	12.5501	1.90144	8.83718	13.3158	-1.38776	-0.472759	0.598601	0.999117
hsa-miR-488-3p	7.26084	3.38487	4.27824	4.64928	4.22725	-1.21195	-0.277333	0.782616	0.999117
hsa-miR-203a-3p	3.45516	3.43695	6.3834	1.88101	0.352271	-1.2016	-0.264951	0.840477	0.999117
hsa-miR-7158-3p	8.41256	35.0464	10.3221	7.27559	39.0316	-1.152	-0.204141	0.81211	0.999117
hsa-miR-203b-3p	2.30344	3.5411	3.93869	2.48435	9.08859	1.75675	0.81291	0.406433	0.999117
hsa-miR-4709-3p	11.8677	11.7689	2.98797	22.1817	34.8044	1.69122	0.758061	0.388268	0.999117
hsa-miR-7843-3p	6.20927	10.6754	3.73497	24.8435	19.3749	1.89482	0.922062	0.336522	0.999117
hsa-miR-127-5p	5.25785	2.03092	4.8215	9.36954	15.359	2.69655	1.43111	0.167929	0.999117
hsa-miR-6126	0.200299	21.9756	4.95732	3.33612	20.9249	-1.13901	-0.187774	0.873355	0.999117
hsa-miR-6864-5p	1.10164	3.22865	1.5619	2.09395	4.86134	1.30463	0.383645	0.754873	0.999117
hsa-miR-3616-5p	6.50972	2.13507	4.95732	4.64928	4.50907	1.08703	0.120386	0.9053	0.999117
hsa-miR-5585-3p	3.00448	1.8747	3.80288	1.5261	4.08634	1.26555	0.339769	0.788606	0.999117
hsa-miR-183-3p	1.45217	3.28072	3.32752	0.106472	0	-2.07005	-1.04967	0.524202	0.999117
hsa-miR-4452	0.851271	2.55167	1.42608	5.85596	2.04317	1.84274	0.881854	0.488611	0.999117
hsa-miR-489-3p	1.80269	0.468675	4.41405	1.70355	0.0704542	1.80911	0.855278	0.572426	0.999117
hsa-miR-192-5p	18.728	19.5802	39.7265	22.3591	15.5704	1.35062	0.433625	0.607655	0.999117
hsa-miR-3136-5p	17.3759	16.8723	32.8677	20.1942	42.6248	1.85769	0.893513	0.314646	0.999117
hsa-miR-943	2.05306	3.48902	5.16105	0.177453	12.8931	2.18614	1.12839	0.34339	0.999117
hsa-miR-580-3p	5.70852	1.51017	1.69771	3.86848	6.12951	1.07877	0.109385	0.927861	0.999117
hsa-miR-3672	1.55232	4.5826	2.85216	5.74949	2.32499	1.19844	0.261155	0.820883	0.999117
hsa-miR-6807-5p	3.05456	7.34257	3.25961	8.83718	4.64998	1.08121	0.112644	0.897685	0.999117
hsa-miR-5708	1.60239	0.052075	0.339543	2.44886	0	1.13206	0.178954	0.91509	0.999117
hsa-miR-1224-5p	2.00299	2.9162	0.611177	1.02923	2.11363	-1.98877	-0.991877	0.439008	0.999117
hsa-miR-4689	3.15471	6.71767	2.17307	2.94573	5.00225	-1.4677	-0.553553	0.598905	0.999117
hsa-miR-6765-5p	2.00299	3.5411	1.29026	4.5783	4.79088	1.28681	0.363797	0.75338	0.999117
hsa-miR-6834-5p	0.350523	6.6656	0.407451	2.30689	0.211363	-3.53066	-1.81994	0.20345	0.999117
hsa-miR-1226-5p	0.901345	2.55167	0.950719	0.425888	0.211363	-3.26706	-1.70799	0.246264	0.999117
hsa-miR-6734-5p	4.9574	6.14485	2.3768	0.709813	9.44086	-1.33465	-0.416456	0.705435	0.999117
hsa-miR-937-5p	1.70254	2.7079	0.407451	3.33612	0	-1.74494	-0.803177	0.577268	0.999117
hsa-miR-627-5p	11.2167	4.27015	2.51262	2.55533	3.52271	-2.71294	-1.43985	0.156356	0.999117
hsa-miR-4658	23.6353	12.3938	35.2445	22.1462	36.143	1.7273	0.788518	0.380802	0.999117
hsa-miR-3161	3.10463	2.4996	1.90144	2.30689	3.09998	-1.16923	-0.22556	0.851741	0.999117
hsa-miR-640	0.701046	5.88447	7.06249	2.83925	0.352271	1.03775	0.0534594	0.966652	0.999117
hsa-miR-10395-5p	2.70404	0.885274	4.41405	0.709813	7.46814	2.32208	1.21542	0.322877	0.999117
hsa-miR-548aw	1.60239	1.0415	4.07451	1.20668	0.0704542	1.34472	0.427305	0.780612	0.999117
hsa-miR-518a-5p	1.60239	2.083	2.92007	1.17119	11.8363	2.86396	1.51801	0.209772	0.999117
hsa-miR-106a-3p	3.40508	3.48902	0.203726	2.23591	5.63633	-1.28192	-0.358302	0.775276	0.999117
hsa-miR-500a-3p	2.85426	2.9162	1.49399	5.39458	0.281817	-1.1952	-0.257256	0.845154	0.999117
hsa-miR-7703	8.46263	11.5086	1.22235	14.8706	0	-1.85713	-0.893073	0.507527	0.999117
hsa-miR-4325	88.7325	46.3467	13.6496	134.013	37.4112	-1.09434	-0.130063	0.888608	0.999117
hsa-miR-3678-3p	4.40658	4.06185	2.85216	0.248435	0	-4.0983	-2.03502	0.172406	0.999117
hsa-miR-7156-3p	5.95889	10.9878	2.78425	8.97914	0.352271	-2.0864	-1.06102	0.292508	0.999117
hsa-miR-6511b-5p	3.75561	2.7079	0.543268	3.44259	0.140908	-2.30697	-1.206	0.376006	0.999117
hsa-miR-153-3p	1.70254	7.03012	8.7602	4.08143	3.66362	1.25802	0.331152	0.755747	0.999117
hsa-miR-448	0.600897	0.31245	2.30889	0.141963	0.211363	1.90517	0.929922	0.562616	0.999117
hsa-miR-4666b	46.7197	35.2027	23.8359	31.9061	50.8679	-1.15341	-0.20591	0.801586	0.999117
hsa-miR-33a-5p	110.715	64.9896	71.7114	50.9291	11.4136	-1.96564	-0.974997	0.260403	0.999117
hsa-miR-192-3p	3.80568	2.65582	3.05588	4.25888	3.59316	1.14861	0.199885	0.856396	0.999117
hsa-miR-3064-3p	3.10463	1.51017	0.135817	1.63257	1.19772	-2.2887	-1.19453	0.397018	0.999117
hsa-miR-4715-3p	3.40508	6.56145	1.15444	4.68477	4.72043	-1.409	-0.494667	0.639526	0.999117
hsa-miR-12121	25.2377	22.5485	17.9278	22.3236	21.2772	-1.15639	-0.209633	0.797615	0.999117
hsa-miR-1202	5.1577	4.68675	2.98797	5.28811	9.2295	1.18242	0.241744	0.789782	0.999117
hsa-miR-5006-5p	6.15919	10.6754	8.55647	4.79124	9.51131	-1.11195	-0.153092	0.878482	0.999117
hsa-miR-5590-5p	0.0500747	2.2913	2.17307	0.0709813	0.140908	-1.47799	-0.56364	0.748984	0.999117
hsa-miR-4659a-5p	17.3759	22.1839	18.1316	18.4197	19.7976	-1.05419	-0.0761402	0.919998	0.999117
hsa-miR-3157-3p	1.80269	5.15542	0.679085	7.70148	6.62269	1.43977	0.525835	0.650872	0.999117
hsa-miR-874-3p	41.2115	28.3809	26.1448	17.4614	14.4431	-1.79979	-0.847831	0.352627	0.999117
hsa-miR-6836-3p	13.1697	15.4142	5.22896	19.8038	11.1318	-1.18127	-0.240334	0.790259	0.999117
hsa-miR-6894-3p	3.90583	5.72825	7.67366	10.8247	11.0613	2.05425	1.03861	0.267701	0.999117
hsa-miR-6514-3p	23.2347	25.2564	15.6869	16.7516	16.909	-1.46866	-0.554504	0.45967	0.999117
hsa-miR-4737	0.350523	0.260375	0.814902	3.54907	0.352271	5.13552	2.36051	0.118661	0.999117
hsa-let-7i-3p	23.8356	12.7584	33.0035	9.01463	12.1886	-1.014	-0.020056	0.979583	0.999117
hsa-miR-6850-5p	21.6323	32.8593	4.95732	7.91442	64.9587	-1.05069	-0.0713408	0.941938	0.999117
hsa-miR-4754	2.05306	1.61432	1.35817	1.45512	11.0613	2.50758	1.3263	0.275764	0.999117
hsa-miR-4639-5p	8.66293	2.2913	2.44471	3.33612	6.41133	-1.35097	-0.433998	0.68338	0.999117
hsa-miR-449c-3p	1.60239	0.2083	1.49399	3.51358	1.26818	2.31659	1.212	0.361662	0.999117
hsa-miR-1178-3p	2.05306	0.31245	4.61778	3.93946	0.0704542	2.42505	1.27802	0.363652	0.999117
hsa-miR-6772-3p	3.60538	3.22865	5.36477	2.51984	5.8477	1.31963	0.400131	0.709915	0.999117
hsa-miR-628-5p	7.41106	6.40522	1.35817	9.01463	3.3818	-1.49518	-0.580321	0.529913	0.999117
hsa-miR-3977	11.6674	16.8202	18.4711	12.4927	6.41133	-1.1428	-0.192568	0.829761	0.999117
hsa-miR-3978	21.0815	45.0969	21.7986	18.3842	57.2792	-1.01928	-0.0275505	0.974277	0.999117
hsa-miR-6079	2.90434	4.89505	1.5619	12.2443	9.58177	2.00168	1.00121	0.280405	0.999117
hsa-miR-6505-5p	43.6652	52.127	7.67366	79.8895	68.9042	1.08917	0.123232	0.888535	0.999117
hsa-miR-4520-3p	7.51121	2.65582	3.73497	0.0709813	6.7636	-1.44644	-0.532507	0.68097	0.999117
hsa-miR-4776-5p	7.11061	4.21807	3.53124	4.32986	0.493179	-2.01943	-1.01395	0.399279	0.999117
hsa-miR-4535	0.600897	4.27015	3.80288	4.82673	10.2863	2.58299	1.36904	0.236041	0.999117
hsa-miR-1269a	2.55381	3.90562	7.40203	11.9604	6.34088	2.67378	1.41888	0.125862	0.999117
hsa-miR-5009-5p	14.9223	9.68594	22.5456	7.48853	29.943	1.62134	0.697188	0.367412	0.999117
hsa-miR-4531	7.56129	25.2043	3.1917	8.3758	20.0794	-1.55364	-0.635657	0.500704	0.999117
hsa-miR-1270	3.9559	6.6656	4.27824	4.82673	0	-1.74522	-0.803408	0.531115	0.999117
hsa-miR-6874-5p	3.9559	3.38487	3.39543	8.7307	8.38405	1.86844	0.901833	0.276002	0.999117
hsa-miR-4443	0.350523	6.249	4.68569	3.26514	3.80453	1.1866	0.246829	0.836573	0.999117
hsa-miR-6515-5p	0.0500747	11.9252	4.8215	9.44052	9.51131	1.32344	0.404292	0.738135	0.999117
hsa-miR-3198	2.65396	3.3328	1.5619	4.36535	16.7681	2.52002	1.33343	0.162474	0.999117
hsa-miR-1261	118.527	111.805	186.748	95.257	167.329	1.29979	0.378279	0.626823	0.999117
hsa-miR-432-3p	18.8782	146.799	14.872	25.7662	86.2359	-1.95897	-0.970095	0.31525	0.999117
hsa-miR-7150	0.550822	0.885274	0.47536	5.57204	0.0704542	2.84398	1.50791	0.310158	0.999117
hsa-miR-4642	9.41405	3.07242	4.61778	4.43633	0.704542	-1.91154	-0.934735	0.385992	0.999117
hsa-miR-548s	2.70404	13.0708	4.07451	8.51776	6.19997	-1.25564	-0.328424	0.728289	0.999117
hsa-miR-4701-5p	13.9709	17.7055	13.8533	21.4364	29.6612	1.36652	0.450502	0.536431	0.999117
hsa-miR-4435	16.1741	21.9756	8.14902	14.1963	8.66586	-1.8293	-0.871295	0.323542	0.999117
hsa-miR-3187-3p	70.9058	57.4908	34.0222	75.5241	131.89	1.25344	0.325896	0.697816	0.999117
hsa-miR-328-3p	144.215	126.073	125.563	72.0106	67.0019	-1.53298	-0.616341	0.427635	0.999117
hsa-miR-6878-3p	56.0837	43.5867	24.4471	59.4824	105.822	1.26901	0.343702	0.689022	0.999117
hsa-miR-4730	4.3565	18.747	7.67366	2.80376	10.3568	-1.66737	-0.737578	0.438046	0.999117
hsa-miR-6770-3p	14.5718	15.9349	4.34614	6.24636	54.6724	1.42518	0.511148	0.581015	0.999117
hsa-miR-8057	11.8677	20.7258	9.23556	19.3779	31.0703	1.22049	0.287462	0.709345	0.999117
hsa-miR-647	22.8341	14.3727	45.8382	28.8894	37.9748	2.01515	1.01088	0.215874	0.999117
hsa-miR-6842-3p	10.6659	3.5411	9.77883	5.57204	23.109	1.80035	0.848276	0.362864	0.999117
hsa-miR-1302	0.500747	4.11392	2.98797	1.77453	0.634088	-1.28055	-0.356764	0.784858	0.999117
hsa-miR-30c-1-3p	19.8296	14.7372	24.515	20.0522	10.5681	1.0642	0.0897679	0.908391	0.999117
hsa-miR-1273h-5p	13.8707	18.6949	12.6989	7.27559	25.7862	-1.07009	-0.0977311	0.907144	0.999117
hsa-miR-450b-3p	20.8812	25.725	12.2235	15.119	37.8339	-1.07385	-0.102791	0.908004	0.999117
hsa-miR-6728-5p	95.9432	63.219	197.138	95.3634	52.9815	1.44693	0.532996	0.527841	0.999117
hsa-miR-5089-5p	19.8296	57.1783	12.4952	33.2902	57.0679	-1.12311	-0.167499	0.851834	0.999117
hsa-miR-6724-5p	3.00448	7.13427	2.17307	0.603341	10.2159	-1.17425	-0.23174	0.840394	0.999117
hsa-miR-1228-5p	6.65994	4.3743	7.46994	9.44052	6.90451	1.45114	0.537183	0.501791	0.999117
hsa-miR-10400-3p	11.367	7.34257	8.7602	5.00418	6.62269	-1.38847	-0.473498	0.613851	0.999117
hsa-miR-1587	27.2407	20.83	47.0606	21.6493	27.6885	1.33469	0.416503	0.623145	0.999117
hsa-miR-2110	22.2833	22.8088	31.1021	24.4886	45.5134	1.49098	0.576265	0.474392	0.999117
hsa-miR-6810-5p	0.300448	0.52075	1.08654	0.106472	0.140908	1.051	0.0717639	0.961257	0.999117
hsa-miR-3150a-3p	4.90733	8.43614	3.32752	9.40503	10.7795	1.17648	0.234475	0.822128	0.999117
hsa-miR-6857-5p	5.10762	12.4459	4.54987	10.2213	13.2454	1.06465	0.0903845	0.918381	0.999117
hsa-miR-1227-5p	6.05904	3.69732	1.01863	2.55533	40.3702	2.9979	1.58395	0.160394	0.999117
hsa-miR-1275	3.25486	8.90482	9.43928	9.26306	6.41133	1.37936	0.463995	0.625224	0.999117
hsa-miR-6751-5p	14.0209	1.6664	8.42066	10.2923	5.21361	1.01758	0.0251396	0.981292	0.999117
hsa-miR-6737-5p	820.174	426.286	1036.9	414.744	230.385	-1.11159	-0.152625	0.863681	0.999117
hsa-miR-3170	4.3565	10.5712	7.46994	12.1378	23.884	1.9404	0.956353	0.305303	0.999117
hsa-miR-1225-5p	0.0500747	1.0415	0.203726	0.248435	0	-3.37637	-1.75547	0.276085	0.999117
hsa-miR-1229-5p	4.80718	10.1546	5.22896	12.2088	6.55224	1.07509	0.104456	0.911093	0.999117
hsa-miR-6741-5p	324.585	236.316	402.833	193.886	154.436	-1.12016	-0.163711	0.835571	0.999117
hsa-miR-3940-5p	143.564	91.4957	182.47	51.6389	82.6427	-1.11346	-0.155055	0.849933	0.999117
hsa-miR-6839-3p	19.429	24.2149	8.55647	22.0042	35.368	1.00695	0.00999647	0.991201	0.999117
hsa-miR-150-3p	3.60538	3.43695	1.29026	3.72652	0.211363	-1.98999	-0.992758	0.450084	0.999117
hsa-miR-1263	2.00299	6.82182	2.44471	5.78498	4.43861	-1.03958	-0.0559963	0.956627	0.999117
hsa-miR-5587-5p	1.75262	5.67617	3.32752	4.79124	0.352271	-1.30811	-0.387489	0.750171	0.999117
hsa-miR-6843-3p	11.5673	8.74859	3.12379	3.30063	7.60905	-2.18642	-1.12857	0.236824	0.999117
hsa-miR-7855-5p	471.604	939.536	1574.19	387.274	1345.75	1.56238	0.643746	0.454249	0.999117
hsa-miR-487a-5p	120.58	118.418	112.185	70.6264	100.468	-1.26719	-0.341628	0.659287	0.999117
hsa-miR-218-1-3p	90.5852	111.336	60.5744	137.81	268.149	1.54019	0.623108	0.449618	0.999117
hsa-miR-29b-2-5p	9.41405	3.07242	9.09974	4.32986	7.32723	1.1036	0.142221	0.881666	0.999117
hsa-miR-2054	0.150224	1.0415	2.71634	0.141963	0.0704542	1.62177	0.69757	0.683598	0.999117
hsa-let-7c-3p	19.9798	4.68675	7.46994	7.80795	0.0704542	-2.40658	-1.26699	0.293223	0.999117
hsa-let-7a-2-3p	140.209	50.8252	78.0269	62.3216	24.8703	-1.73406	-0.794158	0.368747	0.999117
hsa-miR-493-5p	475.81	225.276	654.434	442.817	256.312	1.2871	0.364121	0.684332	0.999117
hsa-miR-135a-2-3p	0.350523	1.2498	0.543268	2.76827	0.0704542	1.42698	0.512964	0.739999	0.999117
hsa-miR-568	0.100149	0.2083	0.543268	0.248435	0	1.68321	0.751214	0.642624	0.999117
hsa-miR-675-3p	2.95441	3.80147	5.50059	2.62631	0.211363	-1.21479	-0.280707	0.832892	0.999117
hsa-miR-297	31.9978	62.5941	10.1184	48.6577	43.118	-1.39174	-0.476892	0.596701	0.999117
hsa-miR-10395-3p	1.10164	1.56225	2.24098	1.27766	0.352271	-1.03045	-0.0432772	0.975678	0.999117
hsa-miR-3912-5p	1.95292	1.09357	2.17307	0.319416	4.01589	1.40851	0.494167	0.710891	0.999117
hsa-miR-4433b-5p	1.35202	0.781124	4.8215	1.66806	0.140908	2.06194	1.044	0.476312	0.999117
hsa-miR-676-3p	5.65845	9.37349	4.41405	15.3675	0	-1.13829	-0.186869	0.882116	0.999117
hsa-miR-6818-3p	4.5568	1.35395	4.21033	3.4071	4.72043	1.38377	0.4686	0.67783	0.999117
hsa-miR-4288	10.1151	7.29049	5.63641	15.403	20.6431	1.59635	0.674779	0.455307	0.999117
hsa-miR-1231	0.350523	5.2075	5.16105	6.95617	6.34088	2.21318	1.14612	0.323023	0.999117
hsa-miR-511-5p	2.15321	4.47845	5.90804	5.18164	0	1.11561	0.157838	0.906424	0.999117
hsa-miR-3611	4.25635	5.98862	3.59915	6.31734	12.9636	1.48555	0.570999	0.537676	0.999117
hsa-miR-6808-3p	3.10463	5.6241	4.54987	3.54907	5.28406	1.01237	0.017731	0.986088	0.999117
hsa-miR-8070	17.2758	18.07	7.40203	41.1692	25.0817	1.39066	0.475766	0.616049	0.999117
hsa-miR-550b-2-5p	12.4185	15.2059	15.7548	12.1733	16.6976	1.06753	0.0942726	0.917491	0.999117
hsa-miR-147b-3p	3.55531	1.35395	0.679085	3.19416	0	-1.87912	-0.910054	0.530914	0.999117
hsa-miR-210-3p	13.7706	12.2897	28.1141	14.6576	11.7658	1.39323	0.478429	0.574943	0.999117
hsa-miR-218-5p	1650.21	1529.13	2033.05	1324.48	1232.95	-1.03892	-0.0550899	0.945664	0.999117
hsa-miR-4752	2.55381	4.27015	4.95732	3.65554	8.24314	1.63324	0.707736	0.48133	0.999117
hsa-miR-7108-5p	113.419	101.911	106.548	87.662	83.5586	-1.16371	-0.218727	0.785646	0.999117
hsa-miR-4474-3p	7.46114	18.3825	5.16105	3.22965	15.359	-1.63618	-0.710329	0.44564	0.999117
hsa-miR-4265	21.3318	27.5997	24.8545	4.64928	9.44086	-1.8878	-0.916704	0.272523	0.999117
hsa-miR-6796-5p	5.20777	0.468675	0.882811	2.80376	0.563633	-1.97806	-0.984083	0.476131	0.999117
hsa-miR-6759-5p	226.638	261.156	289.63	203.113	229.258	-1.01386	-0.0198606	0.979312	0.999117
hsa-miR-592	6.10912	2.34337	1.6298	1.31315	3.09998	-2.12167	-1.0852	0.393287	0.999117
[truncated: 95 more rows]

## Sheet: miRNA - mature
Name	CPM	CPM	CPM	CPM	CPM	Fold change	Log fold change	P-value	FDR p-value
hsa-miR-4455	0	0	0	0	185.015	3131.84	11.6128	0.000472538	0.330777
hsa-miR-874-5p	11.0315	5.40744	0	0	0	-431.443	-8.75303	0.00846504	0.375156
hsa-miR-138-1-3p	15.2159	0	0	0	0	-397.868	-8.63615	0.013157	0.375156
hsa-miR-629-5p	12.5531	0	0	0	0	-328.467	-8.3596	0.0147985	0.375156
hsa-miR-323b-5p	5.32557	6.57662	0	0	0	-309.404	-8.27335	0.0124359	0.375156
hsa-miR-6812-3p	10.0171	0	0	0	0	-262.371	-8.03546	0.0220412	0.375156
hsa-miR-6797-3p	9.76354	0.146147	0	0	0	-259.733	-8.02089	0.0211265	0.375156
hsa-miR-3187-3p	5.70597	3.94597	0	0	0	-255.73	-7.99848	0.023314	0.375156
hsa-miR-4435	0	9.20726	0	0	0	-240.874	-7.91214	0.0347496	0.375156
hsa-miR-3151-5p	9.00275	0	0	0	0	-235.933	-7.88223	0.0291546	0.375156
hsa-miR-548w	4.69157	3.94597	0	0	0	-227.765	-7.8314	0.0317851	0.375156
hsa-miR-6724-5p	0	8.33038	0	0	0	-218.013	-7.76827	0.0354826	0.375156
hsa-miR-4474-3p	0	7.89194	0	0	0	-206.582	-7.69057	0.0347071	0.375156
hsa-miR-3912-3p	4.18438	3.06909	0	0	0	-192.319	-7.58736	0.0315178	0.375156
hsa-miR-331-5p	7.22756	0	0	0	0	-189.668	-7.56733	0.0369065	0.375156
hsa-miR-3922-3p	6.84716	0	0	0	0	-179.754	-7.48988	0.0460891	0.375156
hsa-miR-6823-5p	6.72036	0	0	0	0	-176.449	-7.46311	0.0457811	0.375156
hsa-miR-548ar-3p	3.55038	2.92294	0	0	0	-171.085	-7.41857	0.035716	0.375156
hsa-miR-6823-3p	3.93078	2.4845	0	0	0	-170.738	-7.41564	0.036207	0.375156
hsa-miR-6511a-3p	2.66278	3.65368	0	0	0	-164.067	-7.35814	0.0342501	0.375156
hsa-miR-6827-3p	6.08636	0.146147	0	0	0	-163.892	-7.3566	0.0414539	0.375156
hsa-miR-501-3p	6.08636	0	0	0	0	-159.927	-7.32127	0.0430482	0.375156
hsa-miR-6769b-3p	3.93078	2.04606	0	0	0	-158.6	-7.30925	0.0350605	0.375156
hsa-miR-628-5p	0	5.99203	0	0	0	-157.045	-7.29504	0.0447565	0.375156
hsa-miR-4448	5.45237	0	0	0	0	-143.405	-7.16395	0.047157	0.375156
hsa-miR-24-1-5p	5.45237	0	0	0	0	-143.405	-7.16395	0.0485698	0.375156
hsa-miR-628-3p	5.19877	0	0	0	0	-136.796	-7.09588	0.0475444	0.375156
hsa-miR-6726-5p	4.94517	0	0	0	0	-130.188	-7.02445	0.0470193	0.375156
hsa-miR-5588-3p	4.81837	0	0	0	0	-126.883	-6.98736	0.0473928	0.375156
hsa-miR-1236-3p	4.81837	0	0	0	0	-126.883	-6.98736	0.0470495	0.375156
hsa-miR-4788	0	4.82285	0	0	0	-126.557	-6.98364	0.0516972	0.375156
hsa-miR-548at-5p	1.39479	3.36138	0	0	0	-123.941	-6.95351	0.0448699	0.375156
hsa-miR-548j-5p	4.69157	0	0	0	0	-123.579	-6.94929	0.0545089	0.375156
hsa-miR-6889-3p	4.69157	0	0	0	0	-123.579	-6.94929	0.0501119	0.375156
hsa-miR-6514-3p	0	4.6767	0	0	0	-122.746	-6.93953	0.0515785	0.375156
hsa-miR-6500-3p	4.56477	0	0	0	0	-120.275	-6.9102	0.052262	0.375156
hsa-miR-6729-3p	2.40919	2.04606	0	0	0	-117.95	-6.88203	0.0453425	0.375156
hsa-miR-760	4.43797	0	0	0	0	-116.971	-6.87001	0.0528453	0.375156
hsa-miR-7974	0	4.38441	0	0	0	-115.123	-6.84703	0.0532164	0.375156
hsa-miR-3175	0	4.38441	0	0	0	-115.123	-6.84703	0.0533946	0.375156
hsa-miR-10523-5p	4.05758	0	0	0	0	-107.059	-6.74227	0.0555627	0.375156
hsa-miR-380-3p	4.05758	0	0	0	0	-107.059	-6.74227	0.0576906	0.375156
hsa-miR-3929	0	3.94597	0	0	0	-103.687	-6.6961	0.0598778	0.375156
hsa-miR-6850-5p	0	3.94597	0	0	0	-103.687	-6.6961	0.0579487	0.375156
hsa-miR-4791	3.67718	0.146147	0	0	0	-101.124	-6.65998	0.0559253	0.375156
hsa-miR-125b-2-3p	0	3.79982	0	0	0	-99.8754	-6.64206	0.0598011	0.375156
hsa-miR-99a-3p	3.67718	0	0	0	0	-97.1484	-6.60212	0.0630798	0.375156
hsa-miR-15a-3p	0	3.65368	0	0	0	-96.0633	-6.58591	0.0623757	0.375156
hsa-miR-29a-5p	3.55038	0	0	0	0	-93.8449	-6.55221	0.063375	0.375156
hsa-miR-4488	3.55038	0	0	0	0	-93.8449	-6.55221	0.0633583	0.375156
hsa-miR-6763-3p	3.55038	0	0	0	0	-93.8449	-6.55221	0.0625435	0.375156
hsa-miR-6772-3p	3.55038	0	0	0	0	-93.8449	-6.55221	0.0626215	0.375156
hsa-miR-6842-3p	3.55038	0	0	0	0	-93.8449	-6.55221	0.0625444	0.375156
hsa-miR-570-3p	0	3.50753	0	0	0	-92.2509	-6.52749	0.0628712	0.375156
hsa-miR-589-5p	0	3.50753	0	0	0	-92.2509	-6.52749	0.0620459	0.375156
hsa-miR-335-5p	3.42358	0	0	0	0	-90.5415	-6.50051	0.0643871	0.375156
hsa-miR-6736-3p	3.42358	0	0	0	0	-90.5415	-6.50051	0.0654243	0.375156
hsa-miR-190b-5p	3.42358	0	0	0	0	-90.5415	-6.50051	0.0664622	0.375156
hsa-miR-6514-5p	0	3.36138	0	0	0	-88.4385	-6.4666	0.0677487	0.375156
hsa-miR-6741-3p	3.29678	0	0	0	0	-87.2382	-6.44689	0.0679031	0.375156
hsa-miR-2116-5p	0	3.21523	0	0	0	-84.6258	-6.40303	0.0663862	0.375156
hsa-miR-6756-3p	0	3.21523	0	0	0	-84.6258	-6.40303	0.0673047	0.375156
hsa-miR-195-3p	0.253599	2.92294	0	0	0	-83.4163	-6.38226	0.0603935	0.375156
hsa-miR-520c-3p	0	3.06909	0	0	0	-80.8129	-6.33651	0.0632926	0.375156
hsa-miR-10522-5p	0	3.06909	0	0	0	-80.8129	-6.33651	0.063351	0.375156
hsa-miR-190a-5p	3.04318	0	0	0	0	-80.632	-6.33328	0.0724994	0.375156
hsa-miR-152-5p	0.126799	2.92294	0	0	0	-80.1902	-6.32535	0.0583968	0.375156
hsa-miR-6716-3p	2.91638	0	0	0	0	-77.3292	-6.27294	0.0737486	0.375156
hsa-miR-570-5p	0	2.92294	0	0	0	-76.9998	-6.26678	0.0646628	0.375156
hsa-miR-129-1-3p	0	2.92294	0	0	0	-76.9998	-6.26678	0.064884	0.375156
hsa-miR-937-3p	0	2.92294	0	0	0	-76.9998	-6.26678	0.0651037	0.375156
hsa-miR-3126-3p	0	2.92294	0	0	0	-76.9998	-6.26678	0.0651955	0.375156
hsa-miR-548aq-5p	0	2.92294	0	0	0	-76.9998	-6.26678	0.0663118	0.375156
hsa-miR-454-5p	2.78958	0	0	0	0	-74.0265	-6.20997	0.0694974	0.375156
hsa-miR-135b-3p	0	2.77679	0	0	0	-73.1863	-6.1935	0.0726087	0.375156
hsa-miR-3126-5p	0	2.77679	0	0	0	-73.1863	-6.1935	0.0704396	0.375156
hsa-miR-6873-3p	2.66278	0	0	0	0	-70.7241	-6.14413	0.0726348	0.375156
hsa-miR-365a-5p	0	2.63065	0	0	0	-69.3726	-6.11629	0.0800338	0.375156
hsa-miR-6885-3p	0	2.63065	0	0	0	-69.3726	-6.11629	0.0793072	0.375156
hsa-miR-6764-5p	0	2.63065	0	0	0	-69.3726	-6.11629	0.0785839	0.375156
hsa-miR-6791-3p	4.43797	5.84588	0	0	0.379129	-67.0016	-6.06612	0.022616	0.375156
hsa-miR-518b	0	2.4845	0	0	0	-65.5585	-6.03471	0.085403	0.375156
hsa-miR-6748-3p	0	2.4845	0	0	0	-65.5585	-6.03471	0.0846971	0.375156
hsa-miR-3138	2.40919	0	0	0	0	-64.12	-6.0027	0.0831862	0.375156
hsa-miR-6755-3p	2.40919	0	0	0	0	-64.12	-6.0027	0.082438	0.375156
hsa-miR-2682-5p	6.08636	3.36138	0	0.1279	0	-62.815	-5.97304	0.0281363	0.375156
hsa-miR-32-3p	0	2.33835	0	0	0	-61.744	-5.94823	0.0842219	0.375156
hsa-miR-6766-3p	0	2.33835	0	0	0	-61.744	-5.94823	0.0853581	0.375156
hsa-miR-548c-5p	4.31117	3.06909	0	0.1279	0	-49.185	-5.62015	0.0417667	0.375156
hsa-miR-9985	0.126799	5.55359	0	0.1279	0	-39.5056	-5.30398	0.057556	0.375156
hsa-miR-1269a	5.19877	0	0.141958	0	0	-35.5616	-5.15225	0.069206	0.375156
hsa-miR-17-3p	3.80398	0	0	0.1279	0	-27.0035	-4.75507	0.0854605	0.375156
hsa-miR-335-3p	33.8554	3.65368	2.55524	0	0	-20.8356	-4.38098	0.034475	0.375156
hsa-miR-145-3p	237.368	61.674	25.1265	45.1487	0	-6.36545	-2.67026	0.0105242	0.375156
hsa-miR-424-3p	398.657	366.537	241.328	202.722	161.13	-1.88762	-0.91657	0.0445804	0.375156
hsa-miR-496	358.081	286.448	210.807	195.559	141.036	-1.75841	-0.814271	0.0541235	0.375156
hsa-miR-149-5p	3342.17	3614.8	5771.57	7421.4	4995.4	1.7432	0.801739	0.062996	0.375156
hsa-miR-125a-5p	4376.98	2516.94	3189.5	5877.65	11567.6	1.99535	0.996644	0.0432595	0.375156
hsa-miR-432-5p	60.4832	336.43	499.407	364.132	479.219	2.25537	1.17336	0.0619478	0.375156
hsa-miR-1271-5p	44.6333	72.9274	66.5781	108.971	250.225	2.40924	1.26858	0.0481043	0.375156
hsa-miR-329-3p	32.7142	23.822	31.6566	28.6496	238.472	3.51395	1.81309	0.0332508	0.375156
hsa-miR-451a	22.6971	20.1683	58.7705	87.4837	106.914	3.9069	1.96602	0.0196323	0.375156
hsa-miR-204-5p	2.91638	20.3144	22.9971	119.842	77.3422	6.31681	2.6592	0.00940349	0.375156
hsa-miR-29b-1-5p	4.81837	5.69973	10.7888	49.6252	80.7544	8.89044	3.15226	0.0246512	0.375156
hsa-miR-1301-3p	0	9.6457	20.158	30.5681	81.1335	9.08296	3.18316	0.0386215	0.375156
hsa-miR-1262	0	0.292294	0	14.1969	0	29.1107	4.86348	0.0522729	0.375156
hsa-miR-6894-3p	0	0.292294	4.40069	20.8477	0	52.0924	5.703	0.0200745	0.375156
hsa-miR-3615	0	0	0	4.4765	0	78.1325	6.28785	0.0860485	0.375156
hsa-miR-7110-3p	0	0	0	4.4765	0	78.1325	6.28785	0.0861401	0.375156
hsa-miR-3157-5p	0	0	4.82656	0	0	83.805	6.38897	0.0862859	0.375156
hsa-miR-4689	0	0	0	4.9881	0	86.7656	6.43905	0.080564	0.375156
hsa-miR-205-5p	0	0	0	0	5.3078	88.4986	6.46758	0.0766866	0.375156
hsa-miR-6807-3p	0	0	5.11047	0	0	88.6005	6.46924	0.0816067	0.375156
hsa-miR-642a-5p	0	0	0	5.116	0	88.9244	6.47451	0.0795566	0.375156
hsa-miR-576-3p	0	0	0	5.2439	0	91.0836	6.50912	0.0830611	0.375156
hsa-miR-4536-3p	0	0	0	5.2439	0	91.0836	6.50912	0.0815737	0.375156
hsa-miR-3685	0	0	0	5.2439	0	91.0836	6.50912	0.0818313	0.375156
hsa-miR-6833-3p	0	0	5.39439	0	0	93.3967	6.5453	0.0746419	0.375156
hsa-miR-3680-5p	0	0	0	5.49971	0	95.4023	6.57595	0.084452	0.375156
hsa-miR-6829-3p	0	0	0	5.49971	0	95.4023	6.57595	0.0813183	0.375156
hsa-miR-561-3p	0	0	0	5.62761	0	97.5619	6.60825	0.0795742	0.375156
hsa-miR-4684-3p	0	0	0.567831	5.2439	0	101.878	6.6707	0.0656616	0.375156
hsa-miR-365b-5p	0	0	0	6.13921	0	106.202	6.73067	0.0797122	0.375156
hsa-miR-3121-5p	0	0	0	6.13921	0	106.202	6.73067	0.0793332	0.375156
hsa-miR-2277-5p	0	0	0	6.39501	0	110.523	6.78821	0.0813678	0.375156
hsa-miR-3622a-3p	0	0	0	6.39501	0	110.523	6.78821	0.0844017	0.375156
hsa-miR-1290	0	0	0	6.39501	0	110.523	6.78821	0.086029	0.375156
hsa-miR-4717-3p	0	0	0	6.52291	0	112.684	6.81614	0.0797699	0.375156
hsa-miR-6749-3p	0	0	0	6.77871	0	117.006	6.87044	0.0730663	0.375156
hsa-miR-5579-5p	0	0	0	6.77871	0	117.006	6.87044	0.0732259	0.375156
hsa-miR-502-3p	0	0	0	7.16241	0	123.489	6.94824	0.067804	0.375156
hsa-miR-197-5p	0	0	7.23984	0	0	124.586	6.961	0.0742308	0.375156
hsa-miR-1285-5p	0	0	0	7.41821	0	127.812	6.99788	0.0685721	0.375156
hsa-miR-30e-5p	0	0	0	7.41821	0	127.812	6.99788	0.0720734	0.375156
hsa-miR-383-5p	0	0	1.27762	6.13921	0	129.383	7.0155	0.06024	0.375156
hsa-miR-3679-5p	0	0	0	7.54611	0	129.974	7.02208	0.0694647	0.375156
hsa-miR-155-3p	0	0	3.12307	4.3486	0	131.204	7.03567	0.0543719	0.375156
hsa-miR-6879-3p	0	0	7.80767	0	0	134.187	7.0681	0.0633142	0.375156
hsa-miR-3177-3p	0	0	0	7.92981	0	136.459	7.09232	0.0696713	0.375156
hsa-miR-6795-3p	0	0	2.98111	4.8602	0	137.306	7.10125	0.0581715	0.375156
hsa-miR-4473	0	0	8.80137	0	0	150.99	7.23831	0.0631749	0.375156
hsa-miR-561-5p	0	0	0	9.72041	0	166.732	7.38138	0.0460304	0.375156
hsa-miR-548ay-5p	0	0	4.6846	5.75551	0	180.963	7.49955	0.0349749	0.375156
hsa-miR-6734-3p	0	0	2.27132	8.56931	0	187.246	7.54879	0.0366858	0.375156
hsa-miR-1255b-5p	0	0	4.6846	6.13921	0	187.408	7.55004	0.0359639	0.375156
hsa-miR-4775	0	0	5.96222	4.9881	0	189.496	7.56602	0.0375871	0.375156
hsa-miR-3182	0	0	0	0	11.3739	191.535	7.58147	0.0417229	0.375156
hsa-miR-5193	0	0	2.41328	10.7436	0	226.262	7.82185	0.0258028	0.375156
hsa-miR-6516-5p	0	0	0	0	13.6486	230.114	7.84621	0.0421363	0.375156
hsa-miR-619-5p	0	0	0	0	14.0278	236.543	7.88596	0.042335	0.375156
hsa-miR-206	0	0	0	0	14.4069	242.971	7.92464	0.0430719	0.375156
hsa-miR-96-5p	0	0	2.83915	8.69721	3.41216	259.485	8.01951	0.0189923	0.375156
hsa-miR-548au-5p	0	0	0.141958	0	15.9234	270.63	8.08018	0.0360871	0.375156
hsa-miR-1843	0	0	0	0	16.3025	275.106	8.10384	0.0388525	0.375156
hsa-miR-3130-5p	0	0	4.25873	2.9417	12.8904	331.128	8.37125	0.0126061	0.375156
hsa-miR-548as-5p	0	0	3.83286	0	18.1982	371.55	8.53741	0.0143158	0.375156
hsa-miR-3188	0	0	0	0	23.506	397.175	8.63363	0.0190617	0.375156
hsa-miR-548e-3p	0	0	0	0	27.2973	461.404	8.84989	0.0143256	0.375156
hsa-miR-1913	0	0	0	5.116	22.3686	464.059	8.85816	0.0126177	0.375156
hsa-miR-3180-3p	0	0	0	14.1969	22.7477	625.312	9.28843	0.00610371	0.375156
hsa-miR-6746-5p	0	0	0	0	41.7041	705.422	9.46234	0.00908639	0.375156
hsa-miR-491-5p	0	0	4.82656	0	0	83.805	6.38897	0.0871184	0.376438
hsa-miR-34a-5p	24388.6	35471	28220.2	14033.3	12154.1	-1.65029	-0.722715	0.0878862	0.377425
hsa-miR-9901	2.15559	0	0	0	0	-57.5172	-5.84592	0.0950748	0.381279
hsa-miR-4772-3p	0	2.04606	0	0	0	-54.1135	-5.75792	0.0937797	0.381279
hsa-miR-550a-3p	0	2.04606	0	0	0	-54.1135	-5.75792	0.0941494	0.381279
hsa-miR-3129-3p	0	1.89991	0	0	0	-50.2972	-5.65241	0.0947114	0.381279
hsa-miR-6738-3p	0	1.89991	0	0	0	-50.2972	-5.65241	0.0945421	0.381279
hsa-miR-135a-5p	0	1.89991	0	0	0	-50.2972	-5.65241	0.0973968	0.381279
hsa-miR-3664-3p	1.77519	0	0	0	0	-47.6166	-5.57339	0.101638	0.381279
hsa-miR-6735-3p	0	1.75376	0	0	0	-46.4801	-5.53854	0.0929461	0.381279
hsa-miR-4454	1.64839	0	0	0	0	-44.3178	-5.46981	0.0985276	0.381279
hsa-miR-6505-3p	0	1.60762	0	0	0	-42.662	-5.41488	0.101748	0.381279
hsa-miR-302d-3p	0	1.46147	0	0	0	-38.8425	-5.27957	0.0978686	0.381279
hsa-miR-10395-3p	0	2.77679	0	0.1279	0	-19.5991	-4.29272	0.100349	0.381279
hsa-miR-1260a	14465.1	15936.2	4389.61	12192.6	11789.8	-1.60731	-0.684652	0.101076	0.381279
hsa-miR-378a-3p	266.405	474.393	606.301	728.519	527.747	1.67722	0.746073	0.0979453	0.381279
hsa-miR-1233-3p	0	0	0.567831	2.1743	0	51.3958	5.68358	0.102747	0.381279
hsa-miR-9-5p	0	0	2.55524	0	0.758257	57.6898	5.85024	0.0925891	0.381279
hsa-miR-6815-5p	0	0	3.6909	0	0	64.6332	6.0142	0.102945	0.381279
hsa-miR-7112-3p	0	0	3.6909	0	0	64.6332	6.0142	0.101973	0.381279
hsa-miR-6762-3p	0	0	3.6909	0	0	64.6332	6.0142	0.101965	0.381279
hsa-miR-224-5p	0	0	3.83286	0	0	67.0286	6.06671	0.101634	0.381279
hsa-miR-6513-5p	0	0	0	3.837	0	67.3479	6.07356	0.098384	0.381279
hsa-miR-20a-3p	0	0	3.97481	0	0	69.4245	6.11737	0.097043	0.381279
hsa-miR-184	0	0	3.97481	0	0	69.4245	6.11737	0.0981497	0.381279
hsa-miR-548aj-3p	0	0	0	3.9649	0	69.5042	6.11903	0.0950343	0.381279
hsa-miR-6810-3p	0	0	0	3.9649	0	69.5042	6.11903	0.0952516	0.381279
hsa-miR-6895-3p	0	0	4.25873	0	0	74.2169	6.21368	0.0938937	0.381279
hsa-miR-31-5p	911.053	866.944	528.224	779.295	192.976	-1.77635	-0.828917	0.10601	0.385432
hsa-miR-139-3p	0.126799	0	5.82026	0	0.379129	24.8307	4.63406	0.105722	0.385432
hsa-miR-6775-3p	0	0	3.12307	0	0	55.0553	5.78281	0.106269	0.385432
hsa-miR-1292-3p	0	0	0	3.5812	0	63.0367	5.97812	0.106012	0.385432
hsa-miR-142-5p	0	0	3.12307	0	0	55.0553	5.78281	0.108401	0.389982
hsa-miR-6804-5p	0	0	3.12307	0	0	55.0553	5.78281	0.108638	0.389982
hsa-miR-6868-3p	0	0	3.12307	0	0	55.0553	5.78281	0.110277	0.393845
hsa-miR-2467-3p	0	0	2.83915	0	0	50.2691	5.6516	0.111808	0.395281
hsa-miR-491-3p	0	0	3.26503	0	0	57.4492	5.84421	0.111614	0.395281
hsa-miR-509-3-5p	0	0	0	3.0696	0	54.42	5.76606	0.115415	0.405983
hsa-miR-3177-5p	0.126799	0	0	6.65081	0	26.7387	4.74086	0.118386	0.41435
hsa-miR-548al	0	0	2.69719	0	0	47.8768	5.58125	0.1211	0.42174
hsa-miR-136-5p	24.7259	4.82285	4.82656	0	0	-8.92795	-3.15833	0.125259	0.429809
hsa-miR-125b-1-3p	619.288	545.128	377.039	406.85	256.291	-1.67497	-0.744136	0.124354	0.429809
hsa-miR-1908-5p	4.81837	2.4845	18.7384	14.8364	14.786	4.37336	2.12874	0.124769	0.429809
hsa-miR-125b-5p	45434.7	16657.4	18832.8	55217.2	85308.5	1.71098	0.774826	0.125874	0.429814
hsa-miR-320b	0.633996	1.46147	6.67201	0.5116	24.6434	9.88452	3.30517	0.126578	0.43012
hsa-miR-490-5p	5588.68	10297.7	4086.53	6729.59	4324.72	-1.57379	-0.654239	0.127635	0.431615
hsa-miR-16-2-3p	0.126799	0	0	4.7323	0	19.1842	4.26185	0.130985	0.437281
hsa-miR-6878-3p	0	0	2.55524	0	0	45.485	5.50732	0.131184	0.437281
hsa-miR-586	0	0	2.55524	0	0	45.485	5.50732	0.130119	0.437281
hsa-miR-122-5p	0	2.92294	0	0	0.379129	-14.2127	-3.82911	0.133767	0.437946
hsa-miR-19a-3p	0	2.92294	0	0	0.379129	-14.2127	-3.82911	0.136203	0.437946
hsa-miR-377-5p	36.011	36.2445	13.486	9.97621	0	-4.565	-2.19062	0.138586	0.437946
hsa-miR-181a-3p	879.606	1173.27	695.876	727.624	437.135	-1.6532	-0.725263	0.138891	0.437946
hsa-miR-223-3p	0	0	0	0	1.89564	30.0347	4.90856	0.134909	0.437946
hsa-miR-133a-3p	0	0	0	0	1.89564	30.0347	4.90856	0.137794	0.437946
hsa-miR-4677-5p	0	0	2.27132	0	0	40.7032	5.34707	0.135433	0.437946
hsa-miR-642a-3p	0	0	2.41328	0	0	43.0938	5.42941	0.137418	0.437946
hsa-miR-10525-3p	0	0	2.41328	0	0	43.0938	5.42941	0.136751	0.437946
hsa-miR-6753-3p	0	0	2.41328	0	0	43.0938	5.42941	0.13682	0.437946
hsa-miR-3944-5p	0	0	2.41328	0	0	43.0938	5.42941	0.136889	0.437946
hsa-miR-376a-5p	0	0	2.55524	0	0	45.485	5.50732	0.132389	0.437946
hsa-miR-505-5p	0	0	2.12936	0	0	38.3133	5.25977	0.142105	0.446068
hsa-miR-651-5p	0	15.93	1.70349	0	0.379129	-11.043	-3.46506	0.144548	0.449705
hsa-miR-5696	0	0	1.84545	0	0	33.5352	5.0676	0.143972	0.449705
hsa-miR-6513-3p	0	0	1.70349	0	0	31.1469	4.96102	0.145966	0.450117
hsa-miR-4682	0	0	1.84545	0	0	33.5352	5.0676	0.145347	0.450117
hsa-miR-27b-5p	117.543	70.2967	40.7418	39.1374	0	-3.51875	-1.81506	0.148185	0.450999
hsa-miR-320a-5p	0	0	1.70349	0	0	31.1469	4.96102	0.147266	0.450999
hsa-miR-5010-3p	0	0	1.98741	0	0	35.924	5.16687	0.147846	0.450999
hsa-miR-183-5p	6.72036	0	5.96222	8.82511	40.5668	5.4356	2.44244	0.151465	0.458984
hsa-miR-4636	15.7231	40.9212	10.5049	9.59251	0	-4.17079	-2.06032	0.152917	0.461388
hsa-miR-495-3p	45.9013	40.0443	34.2118	33.8935	227.856	2.28989	1.19528	0.154203	0.463271
hsa-miR-6818-3p	0	0	1.56153	0	0	28.759	4.84594	0.15488	0.463317
hsa-miR-548am-3p	0.126799	0	0	4.0928	0	16.6703	4.0592	0.157621	0.467521
hsa-miR-4725-5p	0	0	1.41958	0	0	26.371	4.72088	0.156957	0.467521
hsa-miR-4755-5p	0	0	0	1.6627	0	30.7861	4.94421	0.1614	0.47671
hsa-miR-195-5p	18.0055	13.2994	1.27762	4.7323	1.13739	-6.12987	-2.61586	0.162225	0.477133
hsa-miR-10400-5p	0	0	0	1.4069	0	26.5035	4.72811	0.167171	0.489622
hsa-miR-887-3p	0	0	0	0.3837	1.13739	22.0356	4.46176	0.168635	0.491853
hsa-miR-196b-5p	6.21316	5.84588	0.851746	2.558	73.9301	4.24828	2.08688	0.17019	0.494327
hsa-miR-421	7.86155	4.969	31.3726	8.69721	25.0225	3.35632	1.74688	0.172673	0.499468
hsa-miR-6858-3p	0.126799	0	3.54894	0	0	14.4716	3.85515	0.173417	0.499554
hsa-miR-493-5p	1112.79	591.311	1267.4	1474.82	1149.52	1.52262	0.606553	0.194111	0.554602
hsa-miR-365a-3p	244.215	192.037	226.848	288.926	530.401	1.59628	0.674716	0.193393	0.554602
hsa-miR-132-3p	0.507197	1.46147	6.38809	3.5812	10.9947	6.83522	2.77299	0.196926	0.560359
hsa-miR-320d	0	0.292294	4.6846	0.2558	0	10.4851	3.39026	0.198393	0.562246
hsa-miR-655-5p	9.00275	15.3454	2.55524	2.9417	0	-5.777	-2.53032	0.206241	0.582132
hsa-miR-4662a-5p	3.80398	6.72276	1.84545	0	0	-7.79344	-2.96226	0.220979	0.618025
hsa-miR-29c-5p	16.2303	6.13817	4.96852	0.1279	0.758257	-5.57164	-2.4781	0.220375	0.618025
hsa-miR-6789-3p	2.53599	6.13817	3.83286	22.5104	17.819	3.38265	1.75815	0.221606	0.618025
hsa-miR-942-3p	12.9335	9.49956	5.25243	0.2558	0	-5.88481	-2.55699	0.228438	0.629956
hsa-miR-12136	3.55038	24.1143	2.98111	5.2439	0	-4.88064	-2.28707	0.227201	0.629956
hsa-miR-877-5p	0	14.1763	3.97481	9.46461	69.7597	3.89891	1.96307	0.228584	0.629956
hsa-miR-99a-5p	3324.17	2820.64	2678.88	2378.81	1411.12	-1.42447	-0.510427	0.230157	0.631804
hsa-miR-345-5p	443.544	292.586	215.492	390.735	60.6606	-1.65424	-0.726168	0.231457	0.63289
hsa-miR-28-3p	400.812	507.569	513.887	554.831	920.524	1.45851	0.544491	0.233609	0.63629
hsa-miR-1268a	55.9185	56.705	18.1706	37.7305	0	-3.01069	-1.59009	0.240468	0.648728
hsa-miR-27a-5p	248.4	120.425	101.642	136.469	148.618	-1.43283	-0.518867	0.24028	0.648728
hsa-miR-106a-5p	0	0	0.141958	0.3837	0	12.5929	3.65454	0.240956	0.648728
hsa-miR-548ah-3p	5.70597	2.33835	1.41958	0	0	-7.55656	-2.91773	0.246019	0.659821
hsa-miR-323a-5p	0.126799	14.7608	12.9181	24.8126	38.292	3.39687	1.7642	0.247715	0.661833
hsa-miR-181a-2-3p	2454.58	2247.74	1987.69	1540.43	1533.95	-1.39285	-0.478043	0.249626	0.664404
hsa-let-7g-3p	18.2591	3.94597	5.67831	0.1279	0	-5.58052	-2.4804	0.25332	0.669147
hsa-miR-26a-2-3p	18.1323	27.0372	14.0538	4.7323	0	-3.55803	-1.83108	0.252417	0.669147
hsa-miR-181d-5p	89.1399	151.847	111.153	59.9852	49.2867	-1.63401	-0.708421	0.266669	0.701761
hsa-let-7a-2-3p	259.431	90.465	110.727	179.188	61.0397	-1.49316	-0.578366	0.270402	0.707134
hsa-miR-186-5p	8.11515	2.63065	16.0412	21.9988	13.6486	3.203	1.67942	0.271741	0.707134
hsa-miR-26a-1-3p	0	2.33835	3.54894	17.1386	0	5.86196	2.55138	0.271509	0.707134
hsa-miR-3605-5p	14.5819	7.89194	6.24614	0	0	-5.28156	-2.40096	0.276512	0.709038
hsa-miR-369-3p	136.056	124.81	112.43	63.8222	67.864	-1.59738	-0.675711	0.277538	0.709038
hsa-miR-654-5p	304.952	243.919	204.277	444.325	601.677	1.51742	0.601619	0.276533	0.709038
hsa-miR-485-5p	777.406	545.567	423.744	620.188	2037.44	1.55229	0.634398	0.275277	0.709038
hsa-miR-150-5p	0.380398	0.438441	0.851746	0.2558	6.82431	5.88507	2.55706	0.274003	0.709038
hsa-miR-2276-3p	0.253599	0	0	0	0	-8.11287	-3.02021	0.279572	0.711637
hsa-miR-188-5p	6.08636	11.9841	4.40069	0	0	-5.9586	-2.57497	0.282337	0.716071
hsa-miR-92a-1-5p	40.0686	20.899	28.9594	65.1012	70.1388	1.78801	0.838355	0.283627	0.716748
hsa-miR-449b-5p	0	0	0.283915	0.1279	0	9.6892	3.27638	0.285592	0.719115
hsa-miR-379-3p	87.3647	159.739	141.532	160.003	214.587	1.39002	0.475111	0.290713	0.727609
hsa-miR-140-3p	0	0	0.283915	0.1279	0	9.6892	3.27638	0.291044	0.727609
hsa-miR-7-1-3p	110.949	232.081	156.153	68.2987	137.245	-1.42353	-0.509473	0.295148	0.735244
hsa-miR-126-5p	6.33996	3.50753	2.12936	0.2558	0	-5.52812	-2.46679	0.301203	0.741796
hsa-miR-4423-5p	15.7231	10.0841	6.95592	2.558	0	-3.92877	-1.97408	0.30192	0.741796
hsa-miR-377-3p	85.5895	48.8131	92.1305	89.0185	137.245	1.57148	0.65212	0.302017	0.741796
hsa-miR-4732-3p	0	0	0	0	0.758257	9.68502	3.27575	0.301213	0.741796
hsa-miR-574-3p	931.721	926.718	1046.37	1028.19	1784.56	1.38352	0.468342	0.305414	0.744912
hsa-miR-203a-3p	0	0	0	0	0.758257	9.68502	3.27575	0.304843	0.744912
hsa-miR-328-3p	139.606	109.61	90.0011	117.924	13.6486	-1.683	-0.751039	0.308335	0.7481
hsa-miR-323a-3p	1020.1	1740.76	1200.11	859.617	981.564	-1.36156	-0.445257	0.308858	0.7481
hsa-miR-3173-5p	0	2.63065	10.6468	8.31351	0.379129	4.89996	2.29277	0.314934	0.760185
hsa-let-7e-5p	2902.44	6487.76	4209.75	4274.68	1342.87	-1.43317	-0.519211	0.319234	0.765288
hsa-miR-31-3p	341.47	242.019	288.458	223.314	124.354	-1.37328	-0.457627	0.318793	0.765288
hsa-let-7c-3p	34.4894	9.49956	10.7888	13.0458	0	-2.74183	-1.45514	0.325726	0.775539
hsa-miR-16-5p	9662.74	4801.37	5433	7757.53	2338.84	-1.39704	-0.482371	0.324879	0.775539
hsa-miR-362-5p	17.8787	34.783	13.344	15.348	0	-2.72936	-1.44856	0.32839	0.77923
hsa-miR-7114-3p	7.60796	4.82285	0	3.7091	0	-4.79937	-2.26285	0.330206	0.780892
hsa-miR-7977	1011.22	913.565	342.686	1559.74	2282.35	1.44925	0.535309	0.333306	0.785569
hsa-miR-3152-5p	16.8643	3.50753	6.81397	0	0	-4.40425	-2.1389	0.335131	0.787221
hsa-miR-4667-3p	9.50994	17.8299	3.54894	7.54611	0	-3.58199	-1.84076	0.342689	0.799609
hsa-miR-5579-3p	0	4.09212	0	4.6044	25.4016	4.83887	2.27467	0.341763	0.799609
hsa-miR-505-3p	5.19877	2.63065	2.12936	0	0	-5.11465	-2.35464	0.347823	0.801782
hsa-miR-374b-3p	58.0741	41.798	43.581	8.69721	0	-2.85597	-1.51398	0.349348	0.801782
hsa-miR-877-3p	18.5127	13.1532	7.80767	8.56931	0	-2.84479	-1.50832	0.345404	0.801782
hsa-miR-410-5p	6.59356	10.5226	32.9342	38.1142	0	2.7699	1.46983	0.348347	0.801782
hsa-miR-23c	0	0	0.283915	0	0	6.78459	2.76226	0.346429	0.801782
hsa-miR-30d-3p	13.0603	16.3685	0.567831	12.2784	0	-3.38298	-1.75829	0.37313	0.821933
hsa-miR-766-3p	23.8383	9.6457	12.7762	5.49971	0	-2.71197	-1.43934	0.361637	0.821933
hsa-miR-100-3p	50.5929	37.1213	19.5902	32.6145	0	-2.51021	-1.32781	0.364911	0.821933
hsa-miR-629-3p	7.10076	43.4057	16.0412	10.8715	6.44519	-2.24937	-1.16952	0.363091	0.821933
hsa-miR-487a-3p	74.1776	76.7272	69.8432	24.4289	26.1599	-1.87106	-0.903858	0.368543	0.821933
hsa-miR-33a-5p	66.5696	46.0363	47.6978	39.5211	16.3025	-1.61546	-0.691944	0.368797	0.821933
hsa-miR-99b-3p	66.1892	118.671	65.5844	81.2166	28.8138	-1.57018	-0.650926	0.373393	0.821933
hsa-miR-185-5p	60.7368	141.616	65.8683	74.4379	56.4902	-1.53804	-0.621093	0.366058	0.821933
hsa-miR-370-3p	757.752	547.467	495.574	756.913	115.255	-1.43079	-0.516814	0.363619	0.821933
hsa-miR-485-3p	294.935	170.554	169.497	214.488	157.338	-1.28828	-0.365447	0.368334	0.821933
hsa-miR-29c-3p	3.80398	2.33835	4.96852	5.62761	19.3356	3.13043	1.64636	0.372689	0.821933
hsa-miR-1299	0	0	0.283915	0	0	6.78459	2.76226	0.36596	0.821933
hsa-miR-486-5p	0	0	0	0.1279	0.379129	6.786	2.76256	0.370455	0.821933
hsa-miR-6770-3p	5.83277	0	1.56153	0	0	-5.26283	-2.39584	0.376987	0.82466
hsa-miR-376b-3p	1452.36	1625.15	1468.55	1386.18	629.353	-1.32442	-0.405362	0.376767	0.82466
hsa-miR-1306-5p	0	4.82285	7.23984	17.6502	0.379129	3.49628	1.80582	0.385785	0.841275
hsa-miR-30e-3p	328.537	531.683	421.756	145.295	347.282	-1.41161	-0.497341	0.393984	0.856488
hsa-miR-219a-1-3p	23.7115	4.38441	11.7825	0	0	-3.54352	-1.82518	0.39761	0.861693
hsa-miR-130a-3p	36.5182	47.6439	24.7006	27.1148	0	-2.42644	-1.27884	0.400222	0.864678
hsa-miR-940	10.0171	8.91497	9.65312	24.9405	23.506	2.0275	1.01971	0.40218	0.866233
hsa-miR-210-5p	14.3283	25.7219	16.893	5.3718	0	-2.67038	-1.41704	0.411984	0.882903
hsa-miR-128-1-5p	0.126799	0.146147	0.567831	0.2558	0.758257	3.06464	1.61572	0.412442	0.882903
hsa-miR-542-5p	348.444	509.322	503.524	300.182	94.0239	-1.43216	-0.518197	0.415292	0.886294
hsa-miR-3135b	165.853	157.546	82.6193	194.024	373.821	1.3391	0.42126	0.417067	0.887377
hsa-miR-1246	0	0.146147	0	0	0	-4.57012	-2.19223	0.433274	0.889051
hsa-miR-548bb-5p	0.126799	0	0	0	0	-4.56979	-2.19213	0.433298	0.889051
hsa-miR-548ab	0.126799	0	0	0	0	-4.56979	-2.19213	0.433298	0.889051
hsa-miR-219a-5p	0.126799	0	0	0	0	-4.56979	-2.19213	0.433298	0.889051
hsa-miR-193b-5p	23.7115	3.65368	0	12.79	0	-3.17939	-1.66875	0.434814	0.889051
hsa-miR-301a-5p	21.5559	7.01506	7.80767	6.90661	0	-2.85839	-1.5152	0.431154	0.889051
hsa-miR-889-5p	84.9555	33.4677	43.8649	52.5669	0	-1.83893	-0.878864	0.428108	0.889051
hsa-miR-455-3p	116.529	108.149	75.2375	118.052	43.5998	-1.41541	-0.501223	0.426344	0.889051
hsa-miR-128-3p	104.863	125.979	87.8718	102.32	58.0067	-1.38279	-0.46758	0.435635	0.889051
hsa-miR-222-3p	588.475	663.8	659.677	499.194	305.199	-1.28165	-0.358001	0.431207	0.889051
hsa-miR-369-5p	2144.94	2446.65	2331.65	1895.61	4588.59	1.27978	0.355897	0.427675	0.889051
hsa-miR-193a-3p	44.7601	23.822	33.644	50.9042	75.0675	1.5405	0.623399	0.421586	0.889051
hsa-miR-4659a-3p	9.50994	8.47653	17.8867	9.33671	29.1929	2.04673	1.03332	0.430112	0.889051
hsa-miR-6803-3p	5.32557	2.92294	3.97481	8.82511	20.8521	2.64726	1.4045	0.421487	0.889051
hsa-miR-329-5p	0	7.01506	2.12936	0	0	-4.71723	-2.23794	0.441636	0.898265
hsa-miR-494-3p	5.07197	0	2.12936	0	0	-3.42063	-1.77426	0.515685	0.898265
hsa-miR-4749-3p	9.25635	0	3.97481	0	0	-3.41625	-1.77241	0.467824	0.898265
hsa-miR-6720-5p	4.56477	6.43047	4.96852	0	0	-3.22971	-1.6914	0.456626	0.898265
hsa-miR-381-5p	4.18438	4.969	4.11677	0	0	-3.22259	-1.68822	0.4593	0.898265
hsa-miR-7108-5p	5.95957	4.09212	4.54264	0	0	-3.22066	-1.68736	0.461128	0.898265
hsa-miR-1249-3p	4.05758	2.04606	2.69719	0	0	-3.21422	-1.68447	0.529707	0.898265
hsa-miR-146b-5p	20.4147	1.89991	11.0727	0	0	-2.99498	-1.58254	0.465033	0.898265
hsa-miR-340-3p	10.5243	2.77679	6.81397	0	0	-2.87804	-1.52509	0.518144	0.898265
hsa-miR-130a-5p	9.25635	5.55359	5.82026	2.1743	0	-2.66046	-1.41168	0.51981	0.898265
hsa-miR-25-5p	4.94517	10.5226	1.56153	6.90661	0	-2.64421	-1.40284	0.521869	0.898265
hsa-miR-339-3p	15.2159	7.89194	13.0601	0	0	-2.63202	-1.39617	0.493024	0.898265
hsa-miR-135b-5p	13.9479	5.26129	5.82026	3.0696	1.89564	-2.56956	-1.36152	0.462097	0.898265
hsa-miR-103a-2-5p	12.1727	5.99203	2.41328	8.18561	0	-2.50017	-1.32203	0.504956	0.898265
hsa-miR-1185-1-3p	5.95957	22.7989	8.80137	9.46461	0	-2.32916	-1.21981	0.492387	0.898265
hsa-miR-625-3p	20.5415	11.2533	10.9307	9.59251	0	-2.2937	-1.19768	0.466454	0.898265
hsa-miR-671-5p	15.2159	16.5146	8.3755	12.79	0	-2.21916	-1.15001	0.494552	0.898265
hsa-miR-148b-3p	17.8787	19.876	9.93703	15.4759	0	-2.20572	-1.14125	0.477981	0.898265
hsa-miR-618	14.9623	22.3605	17.4608	8.05771	0	-2.1736	-1.12009	0.50334	0.898265
hsa-miR-125a-3p	38.8006	46.1825	20.158	40.928	0	-2.08005	-1.05662	0.520156	0.898265
hsa-miR-374a-5p	10.1439	44.4287	24.2748	14.8364	0.379129	-2.05933	-1.04218	0.48868	0.898265
hsa-miR-299-5p	26.1206	29.6678	18.3125	9.08091	19.3356	-1.8248	-0.867738	0.517506	0.898265
hsa-miR-1307-3p	55.6649	81.55	51.9565	50.6484	32.2259	-1.50672	-0.591408	0.533225	0.898265
hsa-miR-582-5p	33.6018	87.8344	80.2061	21.8709	19.3356	-1.49553	-0.580658	0.526189	0.898265
hsa-miR-337-5p	435.429	405.558	468.46	307.6	183.877	-1.31249	-0.392304	0.470226	0.898265
hsa-miR-103a-3p	203.64	294.632	250.839	210.012	135.728	-1.2495	-0.321356	0.476509	0.898265
hsa-miR-3613-5p	703.102	825.731	807.313	698.207	329.842	-1.24856	-0.320267	0.500608	0.898265
hsa-miR-221-3p	5797.9	5101.7	5779.38	4999.49	2329.75	-1.2471	-0.318579	0.491952	0.898265
hsa-miR-214-5p	226.083	153.454	176.595	207.326	72.0344	-1.24584	-0.317122	0.508066	0.898265
hsa-miR-424-5p	536.995	597.157	610.56	442.918	311.265	-1.24502	-0.316174	0.486438	0.898265
hsa-miR-382-5p	1518.8	1492.89	1176.97	1185.12	1277.28	-1.24489	-0.316024	0.453841	0.898265
hsa-miR-199b-5p	667.471	1014.55	881.273	727.88	425.003	-1.23951	-0.309769	0.532555	0.898265
hsa-miR-25-3p	468.777	871.328	715.892	396.362	523.577	-1.22869	-0.297122	0.517401	0.898265
hsa-miR-708-5p	308.376	315.824	327.922	230.86	203.592	-1.22519	-0.293001	0.533579	0.898265
hsa-let-7f-1-3p	1632.67	2166.04	2278.85	1578.8	829.912	-1.21528	-0.281295	0.525648	0.898265
hsa-miR-423-3p	11160.1	10941.7	9565.1	12186.8	5570.92	-1.2133	-0.278935	0.471708	0.898265
hsa-miR-376c-3p	2442.28	1993.74	2353.23	2006.75	1150.28	-1.20723	-0.271697	0.518033	0.898265
hsa-miR-151a-5p	5383.39	7525.84	6842.07	4462.69	4767.16	-1.20476	-0.268746	0.533826	0.898265
hsa-miR-143-3p	19213.1	18954.2	19551.7	14411.3	13711.2	-1.20083	-0.264033	0.482167	0.898265
hsa-let-7b-5p	17310.9	21496.5	21710.6	23387.9	23421.4	1.17709	0.235223	0.526858	0.898265
hsa-let-7i-5p	39048.6	44242.5	53955.4	39138.1	56871.2	1.20031	0.263407	0.486768	0.898265
hsa-miR-29a-3p	150.13	247.719	233.52	269.102	240.747	1.24665	0.318059	0.456987	0.898265
hsa-miR-199a-3p	1928.36	3403.91	3096.38	1847.52	5267.99	1.27662	0.352332	0.473141	0.898265
hsa-miR-32-5p	47.5497	49.1054	79.3543	65.4849	70.897	1.48978	0.575098	0.456305	0.898265
hsa-miR-942-5p	23.7115	53.1975	57.4928	62.799	69.3805	1.6432	0.716505	0.499569	0.898265
hsa-miR-139-5p	33.8554	45.5979	21.0097	20.8477	156.959	1.66277	0.733588	0.503687	0.898265
hsa-miR-129-2-3p	18.7663	15.6377	12.7762	20.7198	59.1441	1.77635	0.828913	0.507525	0.898265
hsa-miR-664a-3p	15.2159	21.7759	38.3286	8.44141	52.3197	1.77656	0.829085	0.51727	0.898265
hsa-miR-339-5p	15.0891	4.38441	22.9971	11.3831	21.6103	1.90188	0.927428	0.452041	0.898265
hsa-miR-98-3p	9.76354	4.82285	5.82026	3.3254	43.2207	2.36482	1.24173	0.458818	0.898265
hsa-miR-30b-3p	6.72036	2.19221	6.38809	3.3254	24.2642	2.48677	1.31427	0.465793	0.898265
hsa-miR-422a	0.633996	0.584588	1.41958	1.9185	1.51651	2.65726	1.40994	0.521622	0.898265
hsa-miR-1292-5p	0	2.33835	0	10.232	0	2.90767	1.53986	0.528814	0.898265
hsa-miR-6787-3p	4.81837	0.146147	0	8.05771	14.4069	2.98239	1.57647	0.501979	0.898265
hsa-miR-320c	0.126799	3.94597	14.6216	5.2439	0	3.25646	1.70331	0.45061	0.898265
hsa-miR-6779-3p	0	0	0	0.1279	0	3.87928	1.95579	0.508488	0.898265
hsa-miR-676-3p	0	0	0	0.1279	0	3.87928	1.95579	0.508488	0.898265
hsa-miR-3129-5p	0	0	0	0.1279	0	3.87928	1.95579	0.508488	0.898265
hsa-miR-219b-5p	0	0	0.141958	0	0	3.87945	1.95585	0.508472	0.898265
hsa-miR-1343-3p	0	0	0.141958	0	0	3.87945	1.95585	0.508472	0.898265
hsa-miR-615-3p	0	0	0.141958	0	0	3.87945	1.95585	0.508472	0.898265
hsa-miR-548i	0	0	0	0	0.379129	3.88042	1.95621	0.508384	0.898265
hsa-miR-548b-5p	0	0	0	0	0.379129	3.88042	1.95621	0.508384	0.898265
hsa-miR-7705	0	0	0	0	0.379129	3.88042	1.95621	0.508384	0.898265
hsa-miR-208a-3p	0	0	0	0	0.379129	3.88042	1.95621	0.508384	0.898265
hsa-miR-548n	0	0	0	0	0.379129	3.88042	1.95621	0.509347	0.898265
[truncated: 2,223 more rows]
