# Supplementary material for: Distinct brain and lung endothelial miRNA/mRNA profiles after exposure to Plasmodium falciparum-infected red blood cells
Source: iScience. 2024 Oct 28;27(11):111265. doi: 10.1016/j.isci.2024.111265 (PMC11576406; doi:10.1016/j.isci.2024.111265)
Supplement: Table S9. miRNA profiles of HMVEC-L1.5+RBCs and HMVEC-L1.5+Rings/ mRNA profiles of HMVEC-L1.5+RBCs and HMVEC-L1.5+Rings [file mmc10.xlsx]

## Sheet: Sheet1
Name	CPM	CPM	CPM	CPM	CPM	CPM	Fold change	Log fold change	P-value	FDR p-value
BOLA2	0.576959	0	1.44502	7.60665	28.3981	0.713141	16.7891	4.06945	2.3578e-06	0.000117828
gene:ENSG00000256861	1.15392	0	0	9.12798	3.2882	3.20913	11.8553	3.56746	7.93906e-05	0.00197629
GDF5	0.576959	0.787331	0	2.82533	7.7721	1.78285	8.92138	3.15727	0.000546738	0.00803853
NPY4R	0.576959	0.787331	0	3.25999	3.2882	4.99199	8.18431	3.03286	0.000400337	0.00643493
S100A4	0	1.181	0	2.17333	3.88605	1.78285	7.45539	2.89828	0.00354176	0.0299114
MAGEE1	0.288479	0.787331	0.289005	2.60799	2.98927	1.78285	5.54766	2.47188	0.00442838	0.0349148
GDF6	3.17327	1.57466	3.75706	22.6026	5.38069	19.9679	5.50019	2.45948	7.23653e-07	4.39247e-05
ZNF552	1.4424	1.181	0.289005	3.47732	5.67962	6.41827	5.07875	2.34447	0.00049168	0.0074696
ELN	0.288479	1.57466	2.31204	9.99731	0.896781	10.3405	5.00501	2.32337	0.00114885	0.0134601
FGF1	0.576959	0	0.867014	3.25999	2.69034	1.78285	4.83933	2.27481	0.00637487	0.0454133
EPHB6	0.288479	1.96833	1.44502	7.60665	2.69034	6.41827	4.64125	2.21451	0.000840494	0.0107741
gene:ENSG00000272772	0.288479	0.787331	4.33507	4.78132	10.4624	9.27083	4.35443	2.12249	0.00049537	0.00751706
PPL	1.4424	1.96833	0.289005	6.30265	1.79356	7.84455	4.34427	2.11911	0.00196036	0.0197417
FAM156A	2.59631	8.66064	6.93611	8.69331	63.3725	6.77484	4.3291	2.11407	0.000283752	0.00504941
HRCT1	1.73088	1.96833	0.289005	3.47732	5.97854	6.77484	4.02225	2.008	0.00129601	0.014637
VAMP5	2.88479	9.0543	4.04606	17.3866	26.9034	14.976	3.80637	1.92842	1.11816e-07	9.04231e-06
S100A2	1.15392	1.181	0.867014	2.39066	5.67962	4.63542	3.76985	1.91451	0.004694	0.036511
NREP	131.258	157.86	72.5402	609.401	277.105	471.03	3.75685	1.90952	4.96328e-12	1.24485e-09
SCHIP1	4.61567	1.57466	0.289005	9.34531	6.5764	8.55769	3.69309	1.88483	0.000473122	0.00727918
TMEM160	2.59631	6.69231	1.73403	9.99731	15.5442	12.1234	3.55218	1.8287	8.6204e-06	0.000347245
PRSS3	5.19263	3.54299	3.46806	5.86799	30.7895	6.77484	3.52163	1.81624	0.000648039	0.00897332
MFAP2	3.17327	13.7783	4.33507	30.2093	10.7614	31.3782	3.43833	1.78171	3.8714e-05	0.00111875
CNN1	2.30783	3.14932	1.73403	8.04131	6.5764	9.6274	3.40435	1.76738	0.00013278	0.00285606
ZBTB16	38.9447	7.47964	15.6062	62.1572	70.5468	68.8181	3.22725	1.6903	4.07144e-07	2.64008e-05
TMEM102	1.73088	2.36199	1.15602	4.12932	5.38069	7.84455	3.22019	1.68715	0.0021933	0.0213594
TMEM177	2.01936	2.36199	1.44502	3.91199	8.36996	6.41827	3.14622	1.65362	0.00185645	0.0189538
gene:ENSG00000286905	3.46175	1.96833	0.867014	6.51998	7.7721	5.70513	3.13309	1.64759	0.00140291	0.015522
MAP2K6	7.78894	3.14932	1.15602	19.1253	8.96781	9.98397	3.1279	1.64519	0.000543377	0.00801677
IFIT1	2.59631	1.96833	2.89005	8.47598	6.87532	8.20112	3.08818	1.62676	0.000276259	0.00494254
gene:ENSG00000286190	20.482	19.6833	10.4042	55.8545	42.1487	53.8421	3.02201	1.59551	1.18413e-09	1.63965e-07
PKDCC	34.329	21.6516	24.2764	77.8051	72.0414	95.5609	3.02105	1.59505	3.48682e-13	1.15876e-10
MARCHF2	6.34654	5.90498	5.78009	17.3866	20.0281	17.472	3.01669	1.59297	1.74153e-07	1.28612e-05
TDRKH	2.88479	1.181	2.02303	7.60665	5.67962	5.34856	3.00167	1.58577	0.00169474	0.0177853
SMIM4	1.4424	5.51131	1.73403	7.60665	7.17425	9.6274	3.00043	1.58517	0.00109878	0.0130762
GCNT1	16.7318	12.5973	14.1612	48.8999	32.882	48.4936	2.97225	1.57156	1.22109e-09	1.65632e-07
GPR39	1.73088	1.57466	2.89005	6.08532	8.07103	4.63542	2.96008	1.56564	0.00211518	0.020812
DUSP23	1.15392	3.54299	2.02303	6.08532	6.5764	6.0617	2.91587	1.54393	0.00229792	0.022118
RAMP1	1.73088	3.14932	3.17905	6.95465	5.38069	10.6971	2.81471	1.49299	0.0016876	0.0177478
TMEM53	2.59631	2.75566	3.46806	3.69466	10.4624	11.4103	2.81116	1.49116	0.00275836	0.0252997
MED11	5.48111	5.90498	3.46806	13.9093	17.6367	9.27083	2.80034	1.4856	0.000112417	0.00255446
CCDC71	9.8083	9.44797	7.51412	24.1239	25.7077	24.6034	2.7815	1.47586	2.41368e-08	2.42431e-06
ASTN2	3.17327	1.96833	1.44502	8.25865	4.78283	4.99199	2.77662	1.47333	0.0042551	0.0338701
ZNF688	4.61567	4.72398	5.20208	11.9533	13.4517	16.0457	2.76564	1.46761	4.91439e-05	0.00133593
MTLN	2.30783	8.66064	2.60104	9.56264	12.256	14.6194	2.76149	1.46544	0.000345486	0.00582811
SERPINB7	8.65438	7.08598	10.4042	16.952	40.6541	14.976	2.75419	1.46163	4.01634e-05	0.00114549
SPC24	7.78894	6.29865	6.64711	21.5159	14.6474	20.3245	2.71748	1.44227	1.45385e-06	7.98594e-05
NUDT6	2.30783	2.36199	3.17905	9.12798	4.78283	7.13141	2.69906	1.43246	0.00289193	0.026045
gene:ENSG00000264058	3.17327	2.75566	3.17905	8.47598	8.66889	7.48798	2.682	1.42331	0.000963342	0.0119345
POLA2	13.5585	15.7466	6.3581	20.4293	29.8927	42.7885	2.61249	1.38543	1.58044e-05	0.000557263
MGARP	2.88479	3.14932	2.31204	6.51998	5.97854	9.6274	2.58824	1.37197	0.00256591	0.023935
LMCD1	11.2507	14.5656	18.4963	38.6852	34.9745	41.3622	2.58177	1.36836	3.17739e-08	3.10567e-06
CBY1	12.4046	12.991	6.93611	28.9053	26.0067	26.3862	2.5796	1.36715	5.21845e-07	3.28762e-05
COX14	4.90415	5.11765	2.60104	9.56264	14.3485	8.20112	2.57596	1.36511	0.000485013	0.00741066
SLC38A4	6.34654	5.51131	7.22512	26.2973	3.58713	18.8982	2.54945	1.35019	0.0034788	0.0295298
C11orf68	38.9447	35.0362	32.6575	81.0651	102.532	86.29	2.51895	1.33282	1.90883e-10	3.02072e-08
CDPF1	3.75023	2.75566	2.60104	7.82398	6.5764	8.91426	2.50282	1.32355	0.00227172	0.0219462
SLC2A12	4.90415	2.36199	2.31204	9.12798	5.08176	10.3405	2.49589	1.31956	0.0048325	0.0372844
DKK1	17.3088	26.3756	21.0973	72.8065	24.512	63.8261	2.49455	1.31878	2.15958e-05	0.00070361
RPP25L	2.30783	5.11765	3.46806	8.04131	12.5549	5.70513	2.47963	1.31012	0.00399787	0.0323258
PRSS23	49.0415	52.7512	50.8648	131.052	104.624	141.915	2.4745	1.30714	2.05121e-12	6.05928e-10
OXLD1	6.34654	6.29865	3.46806	12.1706	13.7506	13.9062	2.47386	1.30676	0.000327994	0.0056404
LSM10	6.9235	22.0453	9.53715	26.0799	33.1809	34.5873	2.46761	1.30312	3.71839e-05	0.00109114
PEX16	8.3659	5.11765	3.17905	11.084	17.3378	13.1931	2.46149	1.29953	0.000674792	0.00923791
HAS2	16.1548	16.5339	11.5602	43.4666	28.697	35.3005	2.45961	1.29843	1.24097e-06	6.98993e-05
PAFAH1B3	5.48111	8.66064	7.80312	14.1266	20.327	19.6114	2.449	1.29219	2.09191e-05	0.000688312
RAB7B	9.23134	4.33032	3.75706	15.8653	9.26674	17.8285	2.442	1.28806	0.00110474	0.0131353
CAVIN2	7.50046	7.08598	8.38113	23.4719	11.6582	21.0377	2.44184	1.28797	3.48518e-05	0.00103876
ATP5MF	26.2516	49.6018	20.2303	70.8505	92.9663	69.1747	2.44136	1.28769	6.38264e-07	3.92798e-05
CCDC80	454.643	421.616	648.237	1289.22	1083.91	1315.39	2.41811	1.27388	2.44395e-09	3.06485e-07
GASK1B	6.9235	5.11765	4.62407	21.7333	6.27747	12.1234	2.4163	1.2728	0.0028217	0.0256263
TUBA1A	236.553	397.996	219.065	710.678	593.669	752.72	2.41243	1.27049	3.25061e-08	3.15404e-06
VPS33B	11.2507	3.93665	5.49109	11.736	21.8217	17.472	2.40912	1.26851	0.000513223	0.00769141
ANKRD39	4.03871	4.33032	3.75706	6.95465	11.3592	11.7668	2.40697	1.26722	0.00157461	0.0169484
PARS2	3.46175	3.54299	2.60104	8.25865	7.7721	6.41827	2.38947	1.25669	0.00341127	0.0291889
S100A6	273.767	611.756	221.089	671.993	1176.58	787.664	2.3832	1.2529	5.59337e-05	0.001486
BOLA1	4.32719	2.75566	2.89005	8.25865	6.87532	9.27083	2.37971	1.25079	0.00361339	0.0302808
DPM3	2.01936	5.11765	2.31204	7.17198	8.36996	5.34856	2.37123	1.24564	0.00710918	0.0492552
MRPL36	8.94286	16.1403	10.9822	23.6893	31.0884	29.2388	2.3626	1.24038	7.5873e-06	0.000312254
F8A1	12.1161	7.87331	8.09213	23.4719	22.7185	20.6811	2.36174	1.23985	1.08122e-05	0.000411825
RNF150	10.9622	12.991	11.8492	39.7719	8.66889	35.657	2.35055	1.233	0.00134605	0.0151428
SAYSD1	7.50046	6.69231	3.46806	13.4746	13.7506	13.9062	2.34487	1.22951	0.00052147	0.00777991
ARSI	8.94286	8.66064	6.3581	15.8653	23.9142	16.4022	2.34189	1.22768	2.87594e-05	0.000896943
AKR1C3	17.8857	10.2353	8.67014	37.3812	13.7506	35.3005	2.34052	1.22683	0.000484501	0.00741066
EBP	10.6737	16.9276	14.4502	28.2533	44.8391	24.2468	2.33079	1.22082	1.72286e-05	0.000587231
SCO2	4.90415	5.11765	4.04606	8.04131	8.07103	17.1154	2.31674	1.2121	0.00229948	0.022118
NAA38	10.3853	16.1403	9.53715	25.8626	29.2949	26.0296	2.31577	1.21149	9.06221e-06	0.000358524
CHCHD1	12.4046	14.172	10.4042	28.2533	29.2949	26.7428	2.31449	1.21069	2.564e-06	0.000124847
NDUFB7	14.424	27.9502	13.2942	33.9039	52.3122	41.0056	2.30817	1.20675	2.68558e-05	0.000845959
N6AMT1	9.51982	13.7783	7.80312	26.0799	16.7399	27.8125	2.30666	1.20581	3.34254e-05	0.00101173
TMEM54	6.9235	9.0543	6.64711	16.7346	20.9249	13.1931	2.30078	1.20212	8.97587e-05	0.0021428
SMO	14.1355	14.172	11.2712	33.2519	25.7077	30.6651	2.30051	1.20195	2.27186e-06	0.000115267
PSG4	6.9235	6.29865	8.67014	14.344	22.1206	14.6194	2.29282	1.19712	0.00015418	0.00319239
ABT1	11.2507	14.5656	7.22512	21.5159	27.5013	25.6731	2.29166	1.19639	8.95144e-06	0.000356262
B4GAT1	19.3281	23.2263	13.2942	44.7706	40.0562	39.5793	2.28967	1.19514	2.66422e-06	0.000128317
COX16	10.0968	8.66064	7.51412	22.6026	15.5442	21.7508	2.28795	1.19406	2.84842e-05	0.000890919
MRPS28	11.5392	10.629	6.93611	19.9946	25.4088	21.0377	2.28082	1.18956	3.17463e-05	0.000974603
APCDD1L	209.436	181.873	188.72	336.214	602.936	382.957	2.27786	1.18768	4.305e-08	4.0876e-06
LSM2	11.8277	23.2263	7.51412	29.1226	36.1702	30.3085	2.27593	1.18646	7.75671e-05	0.00194547
TMEM179B	11.8277	20.0769	7.51412	22.1679	36.1702	30.3085	2.27091	1.18327	0.000114603	0.00258646
TIMM10	4.90415	18.1086	7.22512	22.6026	24.8109	19.9679	2.26888	1.18198	0.00060957	0.00862022
gene:ENSG00000277758	4.61567	4.33032	8.38113	16.3	7.7721	15.6891	2.26675	1.18063	0.00292777	0.0262552
TIMM8B	10.3853	22.0453	6.3581	25.8626	31.6863	29.2388	2.26663	1.18055	0.000311741	0.00543117
CCDC167	5.76959	11.4163	3.46806	16.0826	17.9356	11.4103	2.26368	1.17867	0.00149232	0.0163002
ASB13	6.05807	2.75566	4.33507	10.432	10.7614	9.6274	2.2636	1.17862	0.00128707	0.0145857
FZD2	38.9447	56.6878	40.7496	107.58	91.4717	105.188	2.25842	1.17531	8.37306e-09	9.27525e-07
CDC42EP3	37.2138	38.9729	44.7957	110.405	60.3833	102.336	2.25727	1.17458	3.31403e-07	2.24762e-05
SNAPIN	13.27	16.1403	7.51412	24.5586	28.9959	28.5256	2.25321	1.17198	3.57775e-05	0.00106396
TPGS1	4.03871	7.08598	4.62407	10.6493	12.5549	11.4103	2.24727	1.16817	0.000865979	0.0110052
TSC22D3	49.33	51.1765	33.5245	89.5411	124.952	84.8638	2.23965	1.16327	1.11636e-07	9.04231e-06
HPS6	13.847	14.9593	7.80312	20.4293	26.6045	34.9439	2.23654	1.16127	9.15372e-05	0.00217286
CALHM5	37.2138	30.7059	20.5193	77.8051	42.4476	77.0192	2.23155	1.15804	4.56007e-06	0.000202057
NUDT18	4.90415	5.51131	4.62407	8.47598	11.6582	14.2628	2.22297	1.15249	0.00100165	0.0122945
APOL2	16.1548	12.5973	11.5602	29.7746	34.0777	25.6731	2.21825	1.14942	5.66696e-06	0.000243587
TOX	4.90415	5.90498	5.78009	16.0826	11.0603	8.55769	2.21509	1.14737	0.00198151	0.0199095
ROGDI	8.3659	5.11765	5.78009	12.388	17.0388	14.976	2.21217	1.14546	0.000498479	0.00755562
LCMT2	4.90415	3.54299	3.46806	8.25865	9.26674	9.27083	2.19165	1.13202	0.00491551	0.0377481
ROMO1	8.3659	28.3439	9.53715	26.7319	43.0455	30.6651	2.19148	1.13191	0.00126054	0.0143687
NNMT	15.2894	22.8326	12.7162	36.9466	27.2024	45.9976	2.18531	1.12784	2.88118e-05	0.000896943
RHOB	87.4092	127.941	92.1925	257.974	153.35	257.8	2.1798	1.12419	1.37938e-07	1.0538e-05
UBL5	23.0783	51.5702	18.4963	58.2452	81.906	61.6867	2.17962	1.12408	6.36542e-05	0.00165588
DCTN3	16.7318	38.1855	15.6062	45.8572	57.6929	48.4936	2.17594	1.12164	5.14006e-05	0.00138034
DOLK	14.424	16.1403	10.1152	26.7319	35.2734	25.3165	2.17062	1.1181	2.33482e-05	0.00074968
POLR2F	16.7318	22.4389	15.3172	27.3839	49.6219	41.0056	2.16927	1.11721	3.67151e-05	0.00108216
MT1E	35.7714	40.5475	29.1895	76.2838	63.0736	88.4295	2.16752	1.11604	1.20838e-07	9.61852e-06
INO80B	8.07742	3.54299	6.0691	14.1266	13.4517	11.7668	2.16412	1.11378	0.00182646	0.0187339
CCDC51	4.90415	4.33032	5.49109	7.82398	12.8539	12.48	2.16017	1.11115	0.00217652	0.021227
BLVRB	12.1161	22.8326	8.09213	26.2973	40.6541	24.9599	2.15935	1.1106	0.000279175	0.00498801
DGCR6L	15.0009	20.0769	13.5832	33.0346	32.5831	38.153	2.15779	1.10955	1.315e-05	0.000482882
ZMYND8	70.1005	50.3892	67.0491	126.27	144.98	138.349	2.15639	1.10862	2.10514e-09	2.69073e-07
CAVIN3	43.2719	68.1041	43.6397	109.97	104.326	116.955	2.1554	1.10795	9.41763e-08	7.92332e-06
KNOP1	12.9816	9.44797	12.1382	26.5146	21.2238	28.1691	2.1549	1.10762	1.73558e-05	0.000590054
NTHL1	7.21198	9.44797	5.78009	13.692	17.3378	17.1154	2.15247	1.10599	0.000370209	0.00609058
ATP5ME	17.8857	43.3032	13.5832	47.5959	63.0736	48.4936	2.14345	1.09994	0.000269228	0.00483628
CRADD	5.19263	4.33032	5.49109	6.73732	15.8431	10.3405	2.14165	1.09873	0.0047062	0.0365631
EVA1A	7.21198	10.629	8.38113	18.6906	14.9464	21.7508	2.13629	1.09511	0.000117086	0.00261584
ZMAT5	8.07742	10.629	4.91308	16.0826	16.7399	16.0457	2.1334	1.09315	0.000512749	0.00769141
POLR2L	38.9447	77.9457	43.3507	100.842	123.158	115.885	2.13159	1.09193	1.19784e-06	6.81492e-05
TMEM256	8.07742	16.9276	7.51412	19.9946	26.6045	21.0377	2.12468	1.08724	0.000265509	0.0047824
MSRB1	7.78894	10.629	6.0691	12.1706	22.4195	17.1154	2.12135	1.08498	0.000667111	0.00915161
RPUSD3	17.5972	16.9276	14.4502	36.9466	33.1809	32.4479	2.12129	1.08494	1.11464e-05	0.000419384
GEMIN6	4.61567	9.84163	2.89005	13.04	9.86459	12.48	2.11486	1.08057	0.00628497	0.0450141
TIMM17B	11.5392	17.7149	7.51412	18.908	35.5723	22.4639	2.11068	1.07771	0.000590383	0.00844776
CDK15	14.424	8.26697	4.91308	21.9506	18.2346	18.1851	2.1088	1.07642	0.000804452	0.010372
UQCC2	19.6166	32.2806	10.1152	33.2519	51.1165	45.641	2.10826	1.07605	0.000653547	0.00903952
PLEKHO2	36.6369	39.3665	27.1664	71.0678	65.764	79.1586	2.10566	1.07427	2.12967e-07	1.53026e-05
HSD17B10	12.1161	18.5023	8.67014	24.3413	27.2024	29.5953	2.10226	1.07194	0.000137427	0.00294172
NDUFS3	22.7899	33.0679	20.5193	44.3359	66.6607	47.7804	2.09454	1.06663	8.35061e-06	0.000340505
OVCA2	12.6931	14.172	10.1152	23.2546	24.512	29.9519	2.08954	1.06318	5.67494e-05	0.00150273
SLC39A3	9.51982	12.991	8.95914	20.8639	20.9249	22.8205	2.08364	1.0591	0.00011298	0.00256234
RPS10-NUDT3	5.19263	10.2353	13.2942	18.6906	18.8324	22.4639	2.08305	1.0587	0.000536578	0.00793407
UMPS	14.7124	11.81	11.2712	28.9053	25.1099	23.8902	2.07812	1.05528	5.1133e-05	0.0013781
LBH	12.1161	29.9186	24.8544	55.6372	27.5013	54.9118	2.07239	1.05129	0.000718335	0.00964528
SMUG1	12.1161	9.84163	7.80312	22.1679	15.5442	23.8902	2.06352	1.0451	0.000374367	0.00612864
NOX4	5.48111	9.0543	6.3581	19.56	9.86459	12.48	2.06303	1.04476	0.00361063	0.0302808
MRPL57	13.847	13.7783	7.80312	24.1239	23.6152	24.2468	2.06087	1.04325	5.71485e-05	0.00151029
MYL6	460.99	743.634	460.095	1018.2	1256.09	1154.22	2.06072	1.04315	2.13527e-06	0.000109066
MKS1	9.8083	9.44797	3.75706	15.648	16.7399	14.2628	2.05906	1.04199	0.00186778	0.0190379
NAT14	11.5392	13.3846	9.82616	22.8199	24.512	23.1771	2.05086	1.03623	2.50676e-05	0.00080102
MRPL54	7.50046	13.7783	4.62407	14.5613	24.512	13.1931	2.04914	1.03502	0.00293359	0.0262552
NXN	10.6737	6.69231	6.64711	19.1253	8.36996	22.1074	2.04739	1.03379	0.00371402	0.0308361
GLIPR2	12.6931	16.1403	16.1843	29.3399	29.2949	33.8742	2.04726	1.03369	1.28057e-05	0.000471541
POLD4	23.0783	39.7602	28.6115	48.0305	74.1339	64.1827	2.04658	1.03321	7.41107e-06	0.000307861
NUDT1	8.65438	8.66064	6.93611	15.4306	19.1313	14.976	2.04638	1.03307	0.000429564	0.00681407
CTF1	5.48111	5.11765	4.04606	8.91064	9.56567	12.1234	2.04206	1.03003	0.00390187	0.031814
TTLL1	8.65438	6.69231	7.22512	13.04	20.0281	13.9062	2.04141	1.02957	0.00117205	0.0136427
TMEM14A	4.90415	9.44797	4.91308	13.4746	10.7614	13.1931	2.04096	1.02925	0.00503594	0.0385171
OLFML3	9.8083	21.6516	10.4042	32.3826	19.4303	32.4479	2.0404	1.02885	0.0010172	0.0124052
TOMM22	28.271	46.4525	19.6523	57.8105	72.6393	60.617	2.0392	1.028	2.68451e-05	0.000845959
SLC16A2	30.8673	29.1312	31.2125	69.5465	45.4369	71.3141	2.03897	1.02784	1.86754e-06	9.85129e-05
TMEM101	13.5585	17.3213	7.51412	21.5159	33.1809	22.8205	2.03821	1.0273	0.000641207	0.00893455
USF1	15.5779	20.8643	11.8492	26.5146	39.4584	31.3782	2.03338	1.02388	0.000147018	0.00305838
UBE2D4	10.0968	6.69231	8.09213	13.4746	19.1313	19.9679	2.03315	1.02371	0.000565231	0.00819369
MRPS18A	12.9816	11.0226	9.82616	22.6026	24.512	21.7508	2.02956	1.02117	7.24014e-05	0.00184793
TRAPPC1	48.753	56.6878	36.9926	84.7598	105.222	97.7003	2.02865	1.02052	1.49812e-06	8.12836e-05
LOXL1	66.3502	63.7738	63.003	149.525	95.9556	146.194	2.02841	1.02035	1.36276e-07	1.04712e-05
ELOB	29.7134	67.7104	31.2125	67.8078	104.624	87.3598	2.02771	1.01985	0.000157858	0.00324329
ZNF287	5.19263	5.90498	4.04606	11.736	6.87532	11.4103	2.02282	1.01637	0.00596732	0.0433699
PET100	9.51982	16.1403	7.51412	14.5613	31.9852	19.9679	2.01966	1.01411	0.00218443	0.0212886
NUDT2	9.51982	13.3846	9.24815	18.908	23.0174	22.4639	2.01667	1.01197	0.000281704	0.00502643
NDUFS8	24.5207	42.5159	23.9874	46.9439	74.1339	61.3301	2.01512	1.01087	3.34884e-05	0.00101173
RAD52	9.23134	5.11765	7.80312	14.5613	17.0388	14.6194	2.01492	1.01073	0.00101329	0.0123802
TMEM119	13.27	24.4073	15.3172	31.5133	38.8605	34.5873	2.01489	1.0107	9.82579e-05	0.00230836
DUSP18	6.63502	4.72398	7.80312	12.8226	13.1528	13.9062	2.01263	1.00908	0.00258757	0.0240704
UQCR10	25.6747	32.2806	18.7853	46.5092	54.1058	52.0593	2.01107	1.00797	1.0606e-05	0.000407471
TMEM203	15.5779	20.4706	16.7623	35.6426	32.5831	36.3702	2.00952	1.00685	2.29639e-05	0.000740919
HINT2	6.05807	11.81	6.3581	12.8226	21.8217	13.1931	2.00914	1.00658	0.00319398	0.0277863
COA3	9.23134	16.5339	7.51412	22.1679	22.4195	19.9679	2.0088	1.00633	0.000630593	0.00883355
JOSD2	15.2894	22.4389	8.38113	30.4266	38.8605	22.1074	2.00422	1.00304	0.000843232	0.0107883
SYNC	37.2138	31.0996	25.1434	79.7611	49.323	57.4078	2.00313	1.00226	1.02612e-05	0.000396517
LAMTOR4	10.6737	29.5249	10.4042	24.9933	37.067	38.5096	2.00299	1.00216	0.00281633	0.0256263
VPS25	28.271	39.7602	25.7214	46.0746	74.4328	66.6787	2.00206	1.00149	1.34139e-05	0.000491216
MRGPRF	27.1171	16.5339	20.5193	43.9012	37.067	49.5633	2.00123	1.00089	7.36649e-05	0.00186875
POP4	21.9244	14.5656	13.5832	31.7306	36.768	33.161	2.00038	1.00028	0.000118461	0.00264212
THYN1	16.7318	19.2896	9.53715	25.4279	31.6863	33.5176	2.0002	1.00014	0.000142866	0.00299561
CD248	203.955	169.276	155.195	367.075	290.557	399.359	1.99857	0.998971	7.55073e-07	4.50668e-05
RPS27L	77.8894	99.2037	55.4889	153.22	169.791	138.706	1.99381	0.995531	1.36688e-06	7.57082e-05
NDUFS6	20.1936	35.8235	18.2073	39.7719	57.0951	49.9199	1.99366	0.99542	7.81834e-05	0.00195356
NDUFA13	30.0018	57.0815	28.9005	63.8958	93.2653	72.7404	1.99319	0.995079	5.76762e-05	0.0015182
TTC4	23.6553	16.9276	13.8722	35.6426	40.953	32.0913	1.98978	0.992611	6.34913e-05	0.00165488
FLVCR2	12.6931	9.0543	5.78009	11.5186	24.512	19.2548	1.98975	0.99259	0.00297931	0.0264909
RAB4B	9.8083	14.5656	6.3581	18.256	22.7185	18.5417	1.98316	0.987803	0.00112448	0.0133105
RFLNB	30.8673	35.8235	35.2586	67.5905	61.579	72.7404	1.98295	0.987648	5.49021e-07	3.44252e-05
NDUFA2	13.27	23.2263	10.1152	26.5146	33.1809	31.3782	1.9822	0.987104	0.000292891	0.00517019
CIAO3	10.0968	10.629	13.8722	16.952	26.6045	26.3862	1.98175	0.986772	0.000337062	0.00575169
HSPB1	172.511	244.466	224.846	406.412	383.523	474.952	1.97257	0.980076	1.00275e-06	5.84632e-05
AK1	29.4249	27.5566	18.4963	35.8599	64.8672	48.137	1.96951	0.977834	0.00013908	0.00295333
ZBTB45	11.5392	8.66064	12.7162	21.5159	22.1206	22.8205	1.96757	0.976415	0.000184323	0.00364072
CRYZ	13.847	10.2353	8.95914	26.5146	20.0281	17.8285	1.96723	0.976168	0.000627221	0.00881358
NDUFB1	4.90415	15.7466	8.38113	18.6906	18.2346	18.8982	1.96529	0.974745	0.00231847	0.0222605
NDUFA7	8.94286	20.8643	8.67014	18.256	32.2841	24.2468	1.96463	0.974254	0.00228269	0.0220362
SDF2	19.6166	28.7376	15.6062	41.7279	47.2305	34.5873	1.96379	0.973641	0.000180672	0.00357391
IFI27L2	9.23134	14.172	4.91308	17.3866	22.1206	14.976	1.96224	0.972503	0.00229231	0.022097
ASPSCR1	10.9622	11.0226	11.8492	16.0826	28.0991	23.1771	1.9614	0.971882	0.000490817	0.0074674
NOSIP	18.7512	23.2263	16.4733	34.3386	47.8283	31.3782	1.96048	0.97121	0.000138996	0.00295333
COPS9	11.2507	31.4932	12.1382	34.3386	32.882	39.2227	1.9598	0.970705	0.00133897	0.0150838
NUDT16L1	10.0968	11.81	8.95914	18.6906	23.6152	17.472	1.95923	0.970283	0.000553356	0.00809215
LGALS1	410.506	964.48	369.637	1005.16	1262.67	1145.3	1.95703	0.968663	0.000916205	0.0114789
TXNIP	100.102	63.3801	48.8418	170.824	82.5039	162.24	1.95614	0.968011	0.000209448	0.0040118
PSMB6	55.388	75.1901	49.4198	92.3664	149.762	109.111	1.95607	0.967957	3.54584e-06	0.000163096
SMIM29	9.51982	10.629	7.22512	13.692	21.2238	18.8982	1.95455	0.966838	0.000860525	0.0109569
MZT2B	36.0599	80.3077	39.5936	87.3678	110.902	105.188	1.95387	0.966336	0.00010712	0.00247214
CHN1	49.6184	38.1855	36.1256	94.7571	64.2693	83.0809	1.9529	0.965615	8.48174e-06	0.000344795
POLR2G	17.8857	35.0362	17.3403	38.9026	52.3122	44.5713	1.95182	0.964822	0.000352848	0.00590516
RBX1	17.0203	26.7692	16.4733	32.8173	42.4476	41.0056	1.95001	0.963483	0.000157016	0.00324049
METTL13	26.8286	17.7149	17.6293	42.1626	40.953	39.2227	1.94983	0.963348	8.06457e-05	0.00199261
INTS5	16.1548	15.3529	15.0282	27.6013	37.3659	26.0296	1.94978	0.96331	8.97869e-05	0.0021428
TARS2	18.4627	14.5656	14.4502	29.3399	32.882	31.7348	1.94798	0.96198	7.42977e-05	0.00188122
CDK5	10.0968	13.3846	7.22512	17.1693	20.327	21.7508	1.94656	0.960924	0.00084802	0.0108264
ATP5MG	38.3677	72.8281	27.7444	78.2398	104.923	85.9335	1.94493	0.959717	0.000355244	0.00593248
PSMB3	36.0599	72.8281	36.9926	84.1078	110.304	87.3598	1.94147	0.957147	0.00012283	0.0026988
UQCRQ	22.7899	59.4435	23.1204	64.5478	72.6393	65.9655	1.93982	0.95592	0.000623844	0.00877541
ACOT13	26.5401	27.9502	19.9413	46.0746	43.3444	54.5553	1.93747	0.954174	1.38466e-05	0.000504508
RPS26	61.1576	135.421	63.292	132.573	208.651	160.1	1.93309	0.950912	0.000212809	0.004061
GSN	212.032	184.235	144.213	322.957	372.762	349.082	1.93261	0.950552	2.14145e-06	0.000109066
LIMD2	10.0968	12.991	10.1152	19.3426	22.4195	22.1074	1.9299	0.948524	0.000441416	0.00694408
PDGFRB	254.15	295.249	288.138	535.073	476.49	604.03	1.92943	0.948171	2.45995e-06	0.000121964
PINK1	67.5042	70.8598	69.0721	113.448	157.535	129.792	1.9282	0.947251	2.79658e-07	1.94633e-05
NIPAL3	140.489	111.407	152.883	266.885	247.512	269.567	1.92643	0.945928	7.52131e-07	4.50668e-05
SUOX	14.1355	9.84163	9.53715	19.9946	23.3163	22.8205	1.92537	0.945139	0.000349666	0.00586882
NDUFB10	42.4065	62.5928	38.1486	69.5465	109.706	95.5609	1.92528	0.945072	3.99819e-05	0.00114543
FAU	71.8313	155.498	63.581	156.48	221.206	181.138	1.92473	0.944659	0.000253464	0.00466017
DNASE2	17.3088	17.7149	16.4733	27.6013	40.0562	32.0913	1.92295	0.943324	0.000203994	0.00394142
HMGN3	14.1355	12.2036	15.0282	24.3413	28.3981	28.8822	1.92242	0.942923	0.00021657	0.00411266
CREB3L1	178.28	144.869	204.326	312.307	354.528	350.509	1.9209	0.941784	1.8386e-06	9.77622e-05
ADAM19	18.4627	30.3122	36.4146	44.5532	64.8672	54.1987	1.9187	0.940126	0.000189675	0.0037245
RHOC	143.086	236.199	156.062	280.577	421.786	322.696	1.91709	0.93892	2.13245e-05	0.000698195
ACOT2	12.4046	14.5656	6.93611	20.212	20.626	23.1771	1.91709	0.938917	0.00112995	0.0133441
MRPL27	20.1936	20.8643	9.24815	25.8626	34.6755	35.657	1.91627	0.938303	0.00129449	0.014637
TTI2	8.3659	7.87331	6.93611	11.3013	19.4303	14.2628	1.91524	0.937527	0.0033256	0.0286501
NDUFA11	26.5401	41.3349	23.1204	57.1585	66.9597	48.137	1.91461	0.93705	4.93745e-05	0.00133946
UQCRFS1	38.3677	39.3665	23.9874	62.5918	63.0736	68.105	1.91444	0.936923	1.10458e-05	0.000417136
SMIM26	7.21198	14.5656	6.0691	17.3866	17.3378	16.7588	1.91418	0.936726	0.00202666	0.0202104
ACAT2	27.4055	34.6426	20.8083	42.3799	70.8457	44.5713	1.91259	0.93553	0.000205617	0.0039498
OSR1	32.0212	20.8643	15.6062	39.1199	44.5401	48.137	1.91216	0.9352	0.000288143	0.00511387
TNS3	83.082	98.0227	89.0134	189.297	124.952	201.106	1.90988	0.93348	2.81051e-06	0.000134389
HYAL2	31.4442	28.7376	30.3455	52.8119	53.508	69.1747	1.90953	0.933217	5.73924e-06	0.000243744
COX6B1	30.2903	69.2851	33.8135	71.7198	96.8524	84.8638	1.90883	0.932692	0.000373154	0.00611632
MRPL16	17.5972	14.9593	12.7162	29.1226	27.5013	29.9519	1.90681	0.931162	0.000104521	0.00242902
LRRC17	51.6378	43.3032	24.2764	84.5425	72.9382	69.1747	1.90593	0.930496	9.41669e-05	0.00222733
RRAS	49.6184	52.7512	38.1486	75.6318	99.8417	91.9952	1.90496	0.929763	8.86042e-06	0.000353698
MIEN1	15.8664	29.5249	17.9183	33.9039	50.5187	34.9439	1.90426	0.92923	0.000709223	0.0095422
WDR83OS	26.8286	33.8552	26.8774	51.0732	66.0629	48.137	1.90368	0.928788	2.61286e-05	0.00082697
MRPL41	17.0203	24.8009	11.5602	25.2106	43.6434	32.0913	1.90317	0.928407	0.00156409	0.0169036
BRMS1	25.6747	33.0679	27.1664	49.5519	65.1661	47.4239	1.90184	0.927397	3.89614e-05	0.00112346
MRPL14	13.5585	24.0136	11.2712	27.8186	33.1809	30.3085	1.90152	0.927152	0.00072608	0.00969318
COX5B	28.8479	61.0181	24.8544	60.2012	89.0803	67.7484	1.90103	0.926784	0.000580413	0.00834101
CYB561A3	32.0212	39.7602	28.3225	60.4185	58.5897	69.5312	1.89909	0.925308	4.72388e-06	0.00020862
PMP22	6.05807	6.29865	5.20208	12.6053	8.36996	11.7668	1.89806	0.924523	0.00724973	0.0498431
RNF181	20.7705	36.2172	15.8953	37.5986	58.2908	41.3622	1.89712	0.923807	0.00080728	0.0103984
SCNM1	10.9622	10.629	8.09213	18.4733	22.4195	14.6194	1.8962	0.923113	0.00112707	0.0133293
NDUFA3	7.78894	20.8643	6.64711	19.56	26.6045	19.6114	1.89099	0.919143	0.00618016	0.0445273
COMMD5	8.3659	16.1403	7.51412	16.952	24.2131	18.1851	1.89022	0.918551	0.00315702	0.0275721
ATP5MC1	17.5972	31.4932	18.7853	35.2079	49.6219	42.0753	1.88773	0.916652	0.00054848	0.00803853
MFSD5	18.4627	22.4389	17.6293	32.8173	38.5616	39.2227	1.88757	0.916532	3.3672e-05	0.00101497
COX8A	35.483	80.7014	35.5476	81.7171	110.005	93.4215	1.88689	0.916012	0.000472462	0.00727745
LAMTOR2	10.3853	18.1086	8.09213	19.1253	26.3056	22.4639	1.88677	0.91592	0.00142956	0.0157441
CAPG	50.1954	59.8371	44.2177	80.1958	117.777	92.3517	1.88645	0.91567	1.17842e-05	0.000440019
GSTP1	145.105	281.864	123.405	321.87	381.132	333.75	1.88626	0.915525	0.000266303	0.0047902
AP4M1	10.0968	10.2353	7.51412	14.7786	17.3378	21.3942	1.886	0.915326	0.00116541	0.0136132
TMSB4X	349.06	586.561	353.453	736.758	915.315	776.967	1.88576	0.915144	4.03424e-05	0.00114588
TCEAL7	11.8277	9.44797	7.22512	18.0386	16.1421	19.9679	1.8854	0.91487	0.00102752	0.0124738
FAM89B	25.9631	31.8869	24.8544	47.8132	52.6112	54.9118	1.88489	0.914483	1.63845e-05	0.000571652
FADD	21.9244	25.5882	14.4502	36.7292	37.9637	40.649	1.88437	0.914083	0.000270654	0.00485533
NME3	9.23134	11.4163	8.38113	17.3866	20.327	16.0457	1.88411	0.913883	0.000778428	0.0101747
GEMIN8	6.9235	7.08598	5.78009	12.1706	12.5549	12.48	1.88402	0.913818	0.0070451	0.0489292
ANAPC11	18.7512	49.2082	22.5424	49.7692	63.9704	55.625	1.88386	0.913688	0.000943343	0.0117524
SNRPD2	55.388	101.959	49.7088	101.929	159.627	127.296	1.88294	0.91299	9.62302e-05	0.00226806
MRPS14	11.5392	8.66064	8.95914	18.4733	19.7292	17.1154	1.88116	0.911625	0.000782915	0.010199
EVA1B	29.4249	43.3032	21.6753	50.6385	72.9382	52.7724	1.88027	0.910939	0.000163813	0.00331692
BLOC1S1	18.7512	27.5566	14.1612	33.2519	46.3337	32.8045	1.87927	0.91017	0.000741808	0.00981256
NDUFS7	15.0009	27.5566	19.6523	26.0799	50.5187	39.9359	1.87862	0.909671	0.00145572	0.0159925
RTKN	16.7318	15.7466	13.2942	24.1239	30.4906	32.8045	1.87737	0.908716	0.000203509	0.00394142
EPHX1	51.3493	59.4435	39.5936	90.6278	90.5749	98.77	1.87551	0.907285	1.22343e-05	0.000455514
XYLT2	43.5604	21.2579	28.0334	50.6385	72.6393	52.0593	1.87496	0.90686	0.000216987	0.0041147
TARBP2	13.5585	21.2579	11.5602	26.0799	31.9852	27.0994	1.87471	0.90667	0.000609374	0.00862022
COX6A1	45.0028	102.747	53.4659	107.58	144.083	124.087	1.87336	0.905625	0.000130516	0.00282926
ZSWIM7	7.50046	9.84163	7.80312	13.2573	20.9249	12.48	1.8705	0.903428	0.00443132	0.0349174
GADD45GIP1	32.8866	48.4208	23.9874	52.8119	78.6178	64.1827	1.86692	0.900658	0.000177635	0.00354018
NENF	14.1355	20.4706	12.1382	23.9066	31.6863	30.6651	1.86273	0.897419	0.000448921	0.00704547
GLI4	8.65438	6.69231	6.3581	12.1706	16.441	12.48	1.86027	0.89551	0.00627506	0.0449887
TP53I3	37.7908	33.4616	19.6523	51.5079	71.1447	45.9976	1.8588	0.894374	0.00030702	0.00535592
NDUFA6	39.5217	50.3892	34.6806	75.4145	82.5039	70.2444	1.85864	0.894245	1.06985e-05	0.00040984
ERVK3-1	12.4046	18.8959	14.4502	25.2106	32.2841	26.3862	1.85858	0.894199	0.000488921	0.00745324
COL3A1	1540.77	1889.59	2346.43	4129.76	2156.46	4428.96	1.85484	0.891294	0.000573181	0.00826388
ZMAT2	45.8682	39.7602	32.6575	66.5038	71.4436	82.7243	1.85415	0.890757	1.43708e-05	0.000514909
SNRNP40	25.0977	25.5882	13.8722	34.3386	43.6434	41.3622	1.85415	0.890755	0.000676143	0.00924143
FDXR	28.271	20.4706	10.1152	27.1666	49.323	32.8045	1.85409	0.890709	0.00309351	0.0272425
MRPL23	17.8857	40.5475	16.4733	38.6852	58.8886	40.2925	1.85392	0.890581	0.00239177	0.0227586
CCDC85B	39.2332	49.6018	39.8826	72.8065	77.1232	88.0729	1.85361	0.890335	1.01152e-05	0.00039221
FLYWCH2	10.6737	14.172	8.67014	18.908	22.7185	19.2548	1.85179	0.888922	0.00157854	0.0169566
TOMM40L	8.94286	7.87331	6.93611	14.7786	14.3485	14.976	1.85117	0.888436	0.00281942	0.0256263
LSM3	19.0396	23.6199	16.1843	39.7719	34.3766	31.3782	1.85035	0.887799	0.00017305	0.00346615
RBM4B	16.1548	18.1086	15.8953	28.9053	32.882	31.0216	1.84998	0.88751	0.000264686	0.00478054
ARF5	31.1558	50.7828	26.2994	60.2012	65.465	73.0969	1.84969	0.887283	0.00011038	0.00252544
COL1A1	9962.92	10643.5	13677.7	22897.7	14914.4	25602.5	1.84966	0.887258	0.000115996	0.00260023
AP1S1	57.4074	63.7738	35.2586	73.4585	128.838	86.6466	1.84934	0.887011	0.000257143	0.00469983
C9orf64	8.65438	7.87331	7.51412	18.256	9.56567	16.4022	1.8486	0.886432	0.00601427	0.0435682
C22orf39	7.21198	9.84163	13.2942	19.1253	22.4195	14.2628	1.84608	0.884463	0.00276092	0.0252997
AMIGO2	17.8857	33.0679	30.3455	49.9865	45.7358	53.129	1.84404	0.882872	0.000170573	0.00342511
RRAGA	62.6	62.1991	48.2638	100.842	103.728	114.103	1.84165	0.880997	3.83747e-06	0.000173509
MRPL52	24.8092	29.1312	19.0743	30.6439	65.764	37.7965	1.84004	0.87974	0.00158438	0.0169985
SDC3	146.259	135.421	130.919	286.662	170.388	301.659	1.83842	0.878463	3.30499e-05	0.00100829
DDB2	66.6387	46.4525	43.6397	83.4558	116.88	88.786	1.83817	0.878273	4.6768e-05	0.00128629
MRPL21	10.6737	22.4389	10.4042	18.908	33.4798	26.7428	1.83465	0.875502	0.00516904	0.0390187
LSM4	47.3106	47.6335	42.7727	73.2412	95.3577	84.8638	1.8332	0.874367	1.52782e-05	0.000543029
SNRPC	36.3484	55.5068	34.3915	70.8505	86.091	72.3838	1.83275	0.874006	4.23333e-05	0.00118972
TRAPPC5	16.1548	26.7692	10.9822	31.2959	39.4584	26.7428	1.83166	0.873151	0.00291246	0.026159
JAGN1	30.0018	35.4299	19.0743	48.0305	55.3015	49.9199	1.82912	0.871148	0.000179247	0.00355484
MGST3	40.9641	73.6154	34.9696	84.7598	102.831	84.1506	1.82714	0.869589	0.000334942	0.00573734
TMSB10	696.101	1271.93	736.095	1370.28	1934.36	1629.88	1.82528	0.868118	0.000332065	0.00569566
C14orf119	49.6184	50.3892	32.9465	85.8465	76.2264	78.8021	1.82501	0.867908	6.16113e-05	0.00160903
C11orf98	16.1548	12.2036	9.82616	23.2546	25.1099	21.3942	1.82414	0.867219	0.000594644	0.00849423
NEDD8	61.4461	103.14	56.6449	117.36	161.72	123.017	1.82392	0.867046	5.8921e-05	0.00154484
COX20	16.4433	17.3213	17.3403	36.0772	27.5013	27.8125	1.82254	0.865953	0.000514064	0.00769532
UXT	17.5972	36.6109	18.7853	36.9466	53.209	41.7187	1.82238	0.865821	0.00171114	0.0179245
MRPS26	17.3088	16.1403	12.7162	21.0813	33.4798	30.3085	1.8215	0.865126	0.00109182	0.0130283
TACO1	13.5585	14.5656	7.51412	18.6906	23.0174	22.8205	1.82013	0.864043	0.00193659	0.0195765
DCXR	8.94286	16.5339	7.80312	19.1253	21.8217	17.8285	1.81993	0.863886	0.00416287	0.0332954
SELENBP1	8.94286	6.29865	7.80312	14.1266	14.3485	14.2628	1.8176	0.862038	0.00517207	0.0390195
SF3B5	28.5595	51.9638	23.4094	50.6385	80.4114	56.6947	1.81574	0.860556	0.000945447	0.0117676
MED20	17.8857	14.172	10.9822	28.9053	24.512	23.8902	1.81549	0.860356	0.00124356	0.0142505
NDUFA1	16.7318	34.6426	19.0743	35.4252	53.508	37.7965	1.81434	0.859443	0.00225431	0.0217939
CCDC8	26.2516	32.2806	30.3455	58.0279	37.3659	65.609	1.81367	0.858912	0.00034799	0.00585549
PSMG3	9.51982	12.2036	7.51412	12.388	22.4195	18.1851	1.8135	0.858779	0.00434103	0.0344303
CSTF2T	21.059	14.172	12.1382	31.9479	23.9142	30.3085	1.8123	0.857825	0.000848653	0.0108264
AIP	18.7512	18.5023	15.6062	29.7746	32.2841	34.2308	1.80904	0.855223	0.000587621	0.00841729
PPP1CA	77.3125	87.3937	49.7088	106.493	162.317	118.025	1.80704	0.853628	5.99519e-05	0.00156878
ATOX1	19.3281	23.6199	19.9413	31.5133	44.5401	37.4399	1.80335	0.85068	0.00046327	0.00721107
MRPS12	11.8277	21.6516	11.5602	23.4719	27.2024	29.2388	1.80306	0.850451	0.00251721	0.0236475
FAM222B	15.2894	12.2036	13.2942	22.8199	24.8109	27.8125	1.80273	0.850181	0.000894673	0.0112515
IFIT5	16.7318	14.9593	9.82616	29.3399	18.8324	26.0296	1.80135	0.849077	0.00256761	0.023935
WBP1	18.7512	26.7692	9.24815	28.9053	36.4691	32.4479	1.8007	0.848558	0.00482988	0.0372844
CD63	329.443	499.168	265.595	561.153	779.004	626.851	1.79882	0.847053	0.000299138	0.00523906
ZMYM3	48.753	37.7919	46.5297	77.3705	86.6889	79.1586	1.79848	0.846779	3.61245e-05	0.00106949
ELP6	17.0203	19.6833	11.2712	28.9053	28.0991	27.0994	1.7983	0.846636	0.00067365	0.00923178
TSPO	40.3871	77.1584	33.5245	79.7611	104.027	86.6466	1.79816	0.846518	0.000893527	0.0112478
ITGB3	44.1373	65.7421	73.1182	89.9758	153.35	85.5769	1.79795	0.846351	0.000230407	0.00433825
NDUFA4	44.1373	70.4661	36.1256	92.8011	84.5964	91.6386	1.79745	0.845948	0.000196151	0.00383447
PTGER2	122.315	103.928	99.4176	252.975	139.3	192.548	1.79714	0.845699	3.44694e-05	0.00103199
COA4	13.847	25.9819	8.95914	25.2106	31.6863	29.5953	1.79258	0.842039	0.00394832	0.0321098
ZC3HC1	12.6931	11.81	9.24815	19.9946	19.4303	21.0377	1.79184	0.841441	0.0020069	0.0200886
RAB34	72.4083	95.6607	58.6679	127.574	147.072	129.435	1.79152	0.841182	1.63287e-05	0.000571203
MRPL22	14.7124	16.5339	8.09213	21.9506	22.4195	25.3165	1.791	0.840767	0.00157239	0.0169484
BANF1	45.5797	83.4571	45.6627	86.2811	121.364	103.762	1.78938	0.83946	0.000294508	0.00518529
COL1A2	6620.6	6937.17	8083.46	14267.9	8811.77	15589.6	1.78682	0.837391	0.000262371	0.00475812
STPG1	15.0009	18.1086	10.6932	23.6893	28.3981	24.9599	1.78501	0.835934	0.00172763	0.0180539
TRAF3IP2	16.7318	12.2036	10.9822	22.3853	24.2131	26.0296	1.78216	0.833628	0.00111214	0.0132115
SMARCAL1	28.271	26.7692	25.7214	47.1612	48.4262	48.8501	1.78171	0.83326	7.9764e-05	0.00198188
KTI12	8.07742	8.66064	7.80312	14.1266	14.9464	14.6194	1.78066	0.832413	0.00442219	0.0348867
ZNF32	20.1936	19.2896	11.2712	32.1653	26.0067	31.3782	1.78014	0.831988	0.00149073	0.0163002
MYCBP	10.9622	7.87331	5.78009	15.2133	14.9464	13.5497	1.77969	0.831627	0.00725918	0.0498431
SDHAF2	13.847	13.7783	12.4272	24.3413	23.9142	22.4639	1.77892	0.831002	0.000612241	0.00864879
PMF1	17.5972	28.3439	20.2303	30.2093	44.8391	42.0753	1.77747	0.829823	0.00147689	0.0161849
ATP5MC3	65.1963	92.5114	49.1308	105.624	141.691	119.095	1.77743	0.829792	7.12961e-05	0.00182609
MRPL58	10.9622	16.1403	9.53715	15.648	26.0067	23.1771	1.77719	0.8296	0.00380082	0.0312844
SNRNP25	13.5585	17.3213	10.1152	19.56	26.9034	26.0296	1.77657	0.829098	0.00215166	0.0210463
C19orf53	31.1558	40.5475	24.5654	52.1599	65.465	51.7027	1.77581	0.828477	0.000151075	0.00313298
DCPS	18.7512	14.172	12.1382	21.9506	32.5831	26.3862	1.7756	0.828305	0.00233564	0.0223525
IFT22	8.3659	14.5656	9.53715	18.6906	16.7399	20.6811	1.77488	0.82772	0.00328068	0.0283551
TCEAL8	35.1945	32.2806	17.3403	58.0279	43.0455	48.4936	1.77215	0.825499	0.000895838	0.0112556
TEX264	19.9051	27.1629	17.0513	36.2946	43.6434	31.7348	1.77167	0.825107	0.00103035	0.0124828
TMEM106C	12.6931	20.4706	17.9183	27.6013	32.5831	29.2388	1.77058	0.824226	0.00101173	0.0123746
DYNC2I2	13.5585	23.2263	15.6062	31.7306	28.9959	28.5256	1.77029	0.823987	0.00119912	0.013897
CAT	56.2535	36.6109	35.2586	73.8932	69.3511	84.8638	1.7693	0.823176	0.000118992	0.00264509
POSTN	370.407	386.186	424.259	853.031	580.218	652.88	1.76762	0.821804	7.25661e-05	0.00184793
MVB12A	9.51982	16.5339	13.2942	19.9946	28.3981	20.3245	1.76719	0.821456	0.00202645	0.0202104
MRPL43	24.2323	25.9819	17.9183	39.7719	38.2627	41.0056	1.7669	0.821221	0.000530324	0.00789428
CBWD3	8.94286	11.81	7.22512	13.04	19.7292	16.4022	1.76637	0.820787	0.00610039	0.0441078
POLR3GL	14.7124	12.991	12.4272	24.3413	23.6152	22.8205	1.76541	0.820006	0.000762051	0.0100353
NDUFB3	20.1936	22.0453	17.0513	32.8173	35.2734	36.3702	1.76525	0.819872	0.000342507	0.00579868
PLPP1	27.694	29.9186	20.2303	56.9412	36.4691	42.4319	1.76441	0.819184	0.000717169	0.00963936
S100A13	42.4065	74.7964	32.0795	70.4158	101.336	90.5689	1.76338	0.818347	0.00152952	0.0166115
GUK1	62.6	94.8733	57.8009	105.624	147.67	124.8	1.76216	0.817348	5.76013e-05	0.0015182
FAM174C	13.27	20.4706	12.1382	23.0373	26.6045	30.3085	1.76152	0.816823	0.00265855	0.0246272
GBP1	16.1548	15.7466	10.4042	22.6026	25.7077	26.3862	1.7605	0.815985	0.00217088	0.0212032
AP5S1	14.7124	11.81	13.8722	22.6026	28.3981	21.0377	1.76036	0.815874	0.00123631	0.0141977
TUT1	10.3853	8.26697	8.95914	15.2133	16.441	18.1851	1.76006	0.815626	0.00316954	0.0276243
DNAJB5	8.65438	14.172	8.95914	16.0826	19.4303	19.6114	1.75887	0.814649	0.00378243	0.0311909
BAX	60.8691	86.6064	59.5349	100.408	140.197	122.304	1.75846	0.814316	3.30333e-05	0.00100829
HMCES	13.27	14.172	15.6062	20.6466	30.4906	25.6731	1.75841	0.814269	0.00202293	0.0202035
DDAH2	21.059	35.8235	20.8083	38.6852	47.8283	48.8501	1.75827	0.814161	0.000924148	0.0115566
IMP3	20.482	20.4706	11.8492	27.3839	36.768	28.1691	1.75725	0.813323	0.00239382	0.0227619
ACTB	2106.76	2280.9	2220.13	3596.42	4127.29	3881.27	1.75627	0.812513	4.66013e-05	0.00128629
NDUFB9	33.4636	46.8462	30.6345	47.1612	83.1017	63.8261	1.75333	0.810093	0.000566669	0.00820559
NOP10	38.0793	56.6878	31.7905	58.6799	84.8953	77.0192	1.75009	0.807427	0.000450717	0.00706531
LAYN	36.3484	31.4932	30.9235	70.8505	42.7466	58.8341	1.74981	0.807196	0.00024472	0.00454338
COMMD9	18.4627	23.2263	19.0743	34.5559	36.4691	33.8742	1.74918	0.806681	0.000366613	0.00604638
C1QTNF6	10.3853	9.0543	6.93611	15.2133	13.4517	17.8285	1.74802	0.80572	0.00719892	0.049691
DTYMK	19.6166	31.8869	29.4785	45.2052	48.1273	46.7107	1.7475	0.805289	0.000298612	0.00523674
ZNHIT1	23.9438	42.9095	22.8314	40.4239	57.6929	57.7644	1.74737	0.805188	0.00161176	0.0172289
SORT1	51.9263	74.4027	93.0595	131.486	123.756	127.652	1.74592	0.803986	5.22625e-05	0.00140065
MRPL24	25.0977	29.9186	23.4094	33.6866	57.9919	45.2844	1.74516	0.803358	0.000885039	0.0111876
EIF4E2	67.5042	75.9774	56.3559	110.405	114.19	121.947	1.74332	0.80184	1.24363e-05	0.000459209
C2orf68	21.059	14.9593	15.6062	34.1212	24.512	31.7348	1.74313	0.801678	0.00191989	0.0194372
TMEM205	9.51982	14.9593	10.4042	16.952	24.512	18.5417	1.74199	0.800734	0.00525935	0.0394986
HCFC1R1	16.4433	14.172	13.8722	24.9933	26.3056	27.0994	1.74195	0.800707	0.00138136	0.0153804
H2AJ	17.8857	20.0769	14.7392	28.4706	25.7077	37.7965	1.74172	0.800511	0.0018627	0.019003
ANAPC15	12.1161	15.7466	11.8492	24.7759	20.327	22.1074	1.74166	0.800462	0.00117463	0.013649
NDUFB8	32.3097	51.5702	33.8135	54.3332	77.721	72.0272	1.74143	0.800272	0.000337953	0.00575212
PHLDA3	82.7936	81.4887	71.3841	140.614	134.218	133.001	1.74116	0.800051	6.61666e-06	0.000278593
STX8	14.7124	23.6199	10.9822	23.2546	35.2734	26.3862	1.74038	0.799399	0.00390346	0.031814
TSPAN17	40.3871	42.1222	35.2586	56.2892	78.02	71.3141	1.74003	0.799113	9.62108e-05	0.00226806
CCN2	297.134	420.828	436.397	808.913	422.683	776.61	1.74	0.799087	0.00121872	0.0140873
BAD	17.0203	29.9186	16.1843	25.4279	44.2412	39.5793	1.73891	0.798187	0.00351473	0.0297209
TRIM68	10.0968	8.26697	10.1152	17.3866	16.7399	15.6891	1.73874	0.798039	0.002572	0.0239591
UQCR11	22.7899	48.0272	19.3633	48.8999	61.579	44.9279	1.73636	0.796065	0.00422358	0.0336999
PDE6D	14.7124	14.172	11.2712	24.5586	23.0174	21.0377	1.73611	0.795857	0.0010119	0.0123746
PEX10	16.4433	10.629	15.3172	24.7759	26.6045	23.8902	1.73516	0.795068	0.00225298	0.0217939
KRTCAP2	24.2323	42.5159	29.4785	49.1172	65.465	50.9896	1.73512	0.795037	0.000559605	0.00814767
TRMT112	35.483	75.5837	28.9005	72.1545	89.6781	79.8718	1.73447	0.794492	0.00391895	0.0319012
TMEM219	24.2323	41.7285	25.4324	48.0305	62.1768	46.7107	1.73427	0.794329	0.00108088	0.012945
RBM14	42.4065	37.7919	36.4146	67.5905	69.65	65.2524	1.73417	0.794246	4.6834e-05	0.00128629
RNF26	41.8295	51.5702	48.2638	83.0211	68.1554	93.778	1.7323	0.792686	0.000142379	0.00299468
RNASEH2A	19.0396	24.0136	17.6293	32.5999	38.2627	32.8045	1.7311	0.791689	0.000656735	0.0090654
OPN3	31.1558	20.0769	20.5193	46.0746	37.067	41.7187	1.7309	0.791522	0.000857585	0.0109299
RTL8B	13.847	16.9276	22.8314	30.4266	26.0067	37.0833	1.72977	0.790583	0.00314716	0.0275594
MTX1	25.6747	27.9502	15.6062	33.2519	47.8283	38.153	1.72888	0.789838	0.00297764	0.0264909
LSM7	14.1355	18.8959	15.8953	19.9946	35.8713	28.8822	1.72806	0.789153	0.0028603	0.0257951
NDUFB2	24.2323	41.7285	17.9183	42.5972	50.2198	50.9896	1.72777	0.788912	0.00236568	0.022575
CCDC9B	35.7714	25.5882	21.3863	46.7266	40.3552	56.6947	1.72704	0.788305	0.00103358	0.0124903
FTL	3635.13	4359.45	3080.79	5456.57	7379.31	6283.13	1.72637	0.787741	0.000225063	0.00425572
ECH1	38.9447	48.0272	35.2586	62.1572	75.3296	72.3838	1.725	0.7866	0.000104146	0.0024288
EXOSC7	8.65438	14.9593	9.24815	16.952	21.8217	16.4022	1.72324	0.785126	0.00624712	0.0448571
MRPL2	14.1355	20.4706	13.5832	26.9493	32.2841	21.7508	1.71799	0.780724	0.00296764	0.0264908
ETFB	57.4074	53.1448	37.8596	74.1105	98.0481	82.7243	1.71746	0.780274	0.000253831	0.00466047
PCYOX1L	11.5392	10.2353	8.09213	14.996	21.5228	14.976	1.71741	0.780232	0.00597577	0.0434076
SPOCK1	49.9069	52.7512	38.1486	80.4131	82.8028	75.5929	1.71733	0.780167	0.000179255	0.00355484
DNTTIP1	15.5779	22.0453	13.2942	27.1666	36.4691	22.4639	1.71558	0.778698	0.00297399	0.0264909
HAGH	13.847	20.8643	11.8492	24.1239	28.9959	24.9599	1.71442	0.777718	0.00409967	0.0329885
MIF	107.026	254.701	120.804	242.761	304.308	278.838	1.71387	0.777261	0.00244233	0.0231238
MRPL55	12.9816	14.172	9.82616	18.908	25.1099	18.8982	1.71373	0.777136	0.00345278	0.0294028
MEAK7	32.3097	25.5882	17.0513	36.7292	45.138	47.0673	1.7135	0.77695	0.00237847	0.0226645
SPATC1L	10.6737	11.81	12.4272	17.8213	20.626	22.4639	1.71315	0.776652	0.00408481	0.0328888
MAD2L1BP	9.51982	12.2036	8.95914	16.5173	16.441	19.2548	1.71238	0.776002	0.00397618	0.0322177
PHPT1	26.8286	54.7195	21.3863	47.8132	69.0522	58.4775	1.71221	0.775858	0.00412199	0.0331079
CXXC5	52.7917	46.4525	40.4606	79.3265	69.0522	91.6386	1.71183	0.775539	0.000239849	0.00447169
FRMD6	137.316	139.358	157.797	260.799	248.707	232.84	1.71162	0.775363	3.32219e-05	0.00100963
ZNF362	20.482	20.8643	18.2073	31.9479	31.6863	39.2227	1.71025	0.77421	0.000762482	0.0100353
NLRX1	13.27	12.5973	13.0052	22.6026	20.626	23.5336	1.70917	0.7733	0.00123619	0.0141977
SMIM30	18.4627	14.172	12.4272	27.3839	25.4088	23.8902	1.70883	0.773009	0.0029437	0.0262974
SP110	10.6737	7.08598	11.8492	16.952	16.1421	19.2548	1.70557	0.770257	0.00512574	0.0389507
TTC5	15.2894	13.3846	10.4042	21.7333	22.1206	22.8205	1.70223	0.767428	0.00195457	0.0197132
GTF2H5	17.8857	19.6833	10.1152	27.3839	21.8217	31.3782	1.70207	0.767294	0.00516005	0.0389962
RETREG3	36.6369	39.3665	31.5015	59.3319	63.3725	58.8341	1.70174	0.767011	8.92951e-05	0.0021426
AXL	212.321	187.778	248.255	346.646	422.982	335.533	1.70154	0.766839	8.66751e-05	0.0021025
NIF3L1	16.1548	15.3529	11.8492	24.3413	23.3163	26.0296	1.70114	0.766502	0.00297267	0.0264909
DENND2B	46.4452	44.0905	45.3737	69.7638	75.0307	89.4992	1.70085	0.766254	0.000123353	0.00270584
AGTRAP	25.0977	27.1629	17.0513	36.9466	37.6648	42.4319	1.69893	0.764629	0.00177997	0.0183901
ZDHHC16	33.7521	41.3349	33.2355	54.1159	64.2693	65.609	1.69854	0.764296	0.000145546	0.00303251
BRAT1	26.8286	31.0996	23.4094	38.6852	43.9423	55.9816	1.69841	0.764186	0.000587129	0.00841729
ZBTB8OS	10.9622	10.629	9.82616	16.0826	20.9249	16.7588	1.69758	0.763477	0.00486697	0.0374836
PSMD10	24.5207	23.6199	20.8083	40.2066	38.5616	37.4399	1.69757	0.763469	0.000840019	0.0107741
NOL12	10.9622	15.3529	12.4272	17.3866	27.2024	21.0377	1.69697	0.762963	0.00447255	0.0351797
MRPS34	36.3484	37.3982	38.7266	43.9012	78.6178	69.1747	1.69505	0.761328	0.000694422	0.00941933
PRDX1	343.002	389.729	289.583	540.072	638.508	551.971	1.69487	0.761171	0.000163113	0.00331032
RPL35	200.782	416.104	195.367	381.202	537.172	456.767	1.69426	0.760659	0.00373193	0.030928
GPR137	18.1742	22.8326	19.0743	34.7732	29.5938	36.0136	1.69222	0.758919	0.00112004	0.0132817
TTI1	24.8092	18.5023	15.0282	34.5559	31.3873	32.8045	1.69099	0.757865	0.00171966	0.0179854
CDK9	27.1171	35.0362	26.2994	44.7706	49.024	55.2684	1.68989	0.756932	0.000411405	0.00655995
PTMS	139.336	178.724	204.326	287.314	276.508	319.131	1.68976	0.756821	0.000125384	0.00274132
CALM3	195.877	178.724	156.64	289.487	271.127	337.672	1.68878	0.755986	8.55692e-05	0.00207947
RCCD1	11.8277	8.66064	10.4042	17.8213	17.6367	17.472	1.68814	0.755439	0.00391882	0.0319012
GEMIN5	16.7318	22.0453	19.3633	32.3826	31.6863	32.8045	1.6857	0.753351	0.00160778	0.0172217
NIPSNAP3A	14.1355	12.991	11.2712	23.0373	20.9249	19.9679	1.68475	0.752531	0.00281203	0.0256263
CHST12	17.8857	19.6833	17.9183	27.3839	37.3659	28.8822	1.68373	0.751657	0.00308335	0.0271927
AKR1C1	570.901	605.064	717.309	1179.9	760.471	1245.5	1.68254	0.750642	0.000563194	0.00817307
SRR	10.6737	12.991	7.51412	18.4733	17.3378	14.6194	1.68243	0.750546	0.00711056	0.0492552
NSUN5	13.27	14.9593	9.53715	17.604	26.0067	19.6114	1.68178	0.749986	0.00617866	0.0445273
RAB11FIP1	14.1355	13.3846	17.9183	25.8626	24.8109	26.7428	1.68146	0.749717	0.00306658	0.0271218
FLAD1	17.8857	19.2896	15.3172	26.5146	33.4798	28.1691	1.68026	0.748686	0.00204029	0.0203172
NAGK	45.5797	64.9548	43.3507	75.8491	96.5535	84.1506	1.67754	0.746346	0.000476506	0.00732277
AAR2	23.0783	24.8009	21.0973	33.9039	43.0455	39.5793	1.67731	0.74615	0.00140949	0.0155617
MRPL15	27.1171	17.3213	20.5193	30.6439	42.1487	38.153	1.67717	0.746027	0.00285246	0.0257593
TEAD2	31.4442	32.2806	25.1434	48.0305	52.9101	46.7107	1.674	0.743299	0.000399692	0.00643493
NIT1	17.3088	17.7149	10.4042	23.0373	26.3056	26.3862	1.67398	0.743282	0.0056282	0.0415412
COX7A2	31.4442	73.2218	32.9465	71.5025	83.9985	73.4535	1.67241	0.741924	0.00478543	0.0370475
MRPL40	15.5779	13.7783	11.5602	21.9506	21.2238	26.0296	1.67196	0.741536	0.00315922	0.0275721
MFAP1	31.4442	27.9502	25.7214	42.1626	49.6219	52.7724	1.67076	0.7405	0.000572197	0.00826388
PIN1	28.271	39.3665	21.6753	41.9452	59.1876	47.0673	1.67071	0.740459	0.00196589	0.0197824
SLX4	15.2894	14.9593	21.3863	28.4706	29.8927	29.2388	1.67051	0.740284	0.00213194	0.020915
SNRPG	26.5401	47.2398	21.0973	45.6399	56.4972	55.2684	1.67044	0.740232	0.0045523	0.0356382
CISD3	18.1742	20.4706	16.1843	27.1666	40.3552	23.5336	1.67017	0.739996	0.00620989	0.0446689
BTN3A2	27.9825	29.1312	22.5424	42.8146	40.953	49.2067	1.66912	0.739085	0.000844498	0.0107941
NSL1	17.5972	15.3529	13.2942	31.7306	20.9249	23.5336	1.66796	0.738083	0.00598813	0.0434737
VPS72	25.0977	24.0136	18.4963	37.8159	40.3552	33.161	1.66679	0.737076	0.00208922	0.0206024
POLR2J	20.1936	29.9186	22.2534	40.4239	37.067	40.2925	1.66617	0.736532	0.00237616	0.0226588
CDC42	72.9853	113.376	90.7474	130.617	213.434	116.599	1.66489	0.735428	0.00103063	0.0124828
PDLIM2	18.7512	36.6109	20.2303	40.4239	37.9637	45.9976	1.6639	0.73457	0.00446135	0.0351123
MXRA8	276.363	261.787	244.209	405.76	444.505	454.627	1.66364	0.734343	0.000141735	0.0029906
ATP5MJ	21.9244	45.6652	22.2534	48.0305	46.9316	53.129	1.66298	0.733774	0.0038715	0.0316654
BABAM1	40.9641	44.4842	45.6627	57.1585	90.276	71.3141	1.6624	0.73327	0.000584124	0.00838527
TMEM147	34.906	48.4208	29.1895	52.3772	71.4436	62.0433	1.66129	0.732303	0.000841794	0.0107803
PCDHGC3	72.9853	60.6245	67.6271	94.3224	139.001	102.336	1.66119	0.732215	0.000130292	0.00282926
GPX1	90.0055	144.869	69.0721	134.746	226.587	142.628	1.66074	0.731822	0.00264282	0.0244986
TRIM21	10.3853	15.3529	11.2712	18.6906	20.327	21.7508	1.65887	0.730204	0.00687176	0.048153
MRPL28	33.7521	40.5475	27.1664	46.5092	70.8457	50.2764	1.65831	0.729712	0.00113936	0.013403
ERI3	27.4055	39.3665	27.7444	48.0305	54.1058	52.4159	1.65791	0.729364	0.00103631	0.012512
RFX5	40.6756	24.8009	20.8083	55.2025	37.067	50.9896	1.65676	0.728367	0.00448279	0.0352393
ARL2	30.0018	45.6652	30.9235	51.2905	64.5683	59.1907	1.65568	0.727421	0.000683095	0.00929954
MEA1	47.0221	58.6561	34.1025	68.4598	89.6781	72.0272	1.65489	0.726738	0.000999122	0.0122758
HIF3A	10.6737	16.9276	22.8314	25.2106	31.6863	26.7428	1.65477	0.726631	0.00669943	0.0472193
PFDN1	39.2332	34.6426	28.0334	58.2452	54.7037	54.5553	1.65409	0.726042	0.00033579	0.00573734
PRPS1	29.4249	26.7692	19.6523	51.2905	32.2841	41.0056	1.65375	0.725738	0.00355157	0.0299562
UBL7	27.1171	25.5882	28.9005	37.8159	51.1165	48.137	1.6526	0.724737	0.000724935	0.00969318
SLIRP	12.9816	22.4389	16.4733	26.0799	30.1916	27.8125	1.65219	0.724383	0.00297816	0.0264909
SRI	40.6756	50.7828	28.0334	62.8092	64.5683	68.4615	1.65064	0.72303	0.000965497	0.0119438
PRELID1	85.1014	115.738	80.6323	132.138	173.378	157.248	1.64851	0.72116	0.000225513	0.00425816
MRPL51	54.5226	65.3484	45.9517	79.9785	96.8524	95.5609	1.64818	0.720876	0.00031383	0.00546039
SDHC	50.4839	55.1131	32.3685	69.9812	75.3296	81.2981	1.648	0.720719	0.000872151	0.011052
DYNLL1	105.295	190.14	95.6605	212.334	217.918	211.803	1.64574	0.71874	0.00108136	0.012945
TTC38	15.2894	19.6833	15.0282	25.2106	31.3873	24.6034	1.64566	0.718667	0.00382723	0.0314045
SSNA1	19.6166	28.7376	20.8083	33.2519	45.7358	33.5176	1.64338	0.716665	0.00478805	0.0370475
GLMP	35.7714	38.9729	33.5245	54.7679	69.65	52.7724	1.64329	0.716589	0.000337669	0.00575212
PBX1	62.6	52.3575	50.8648	96.2784	88.1835	87.3598	1.64247	0.715865	0.000197089	0.00384714
AAAS	36.6369	44.0905	32.9465	52.5945	70.8457	62.3998	1.63885	0.712688	0.000607473	0.0086089
HINT1	71.2544	154.71	58.9569	145.613	153.35	166.875	1.6385	0.712379	0.00610754	0.0441237
NFS1	22.2129	21.6516	13.5832	32.8173	28.697	31.3782	1.6377	0.711672	0.00595399	0.0433402
KAT14	17.5972	11.4163	14.7392	21.2986	25.4088	27.8125	1.63757	0.711553	0.00720816	0.0497239
NDUFS4	29.7134	34.2489	22.5424	48.8999	42.7466	47.4239	1.63663	0.710726	0.00157058	0.0169462
TMEM120A	13.847	22.8326	17.0513	22.8199	34.3766	30.3085	1.63608	0.710244	0.00694116	0.048537
PEF1	38.9447	44.8778	29.7675	54.5505	69.3511	60.9735	1.63542	0.709662	0.000705781	0.00952897
ECSIT	15.5779	21.2579	15.6062	25.8626	30.4906	28.5256	1.63495	0.709243	0.00279557	0.0255406
KLHL12	43.8489	31.8869	20.2303	56.2892	50.5187	49.9199	1.63437	0.708739	0.00395292	0.0321148
TOMM6	24.2323	41.3349	26.2994	44.3359	61.2801	43.145	1.63334	0.707829	0.0034674	0.0295084
COMMD4	17.5972	27.1629	17.9183	29.3399	37.9637	33.8742	1.63295	0.707479	0.00382715	0.0314045
RNF7	40.3871	39.3665	25.1434	59.1145	55.0026	55.9816	1.63286	0.707405	0.000869924	0.0110343
HTATIP2	47.5991	38.1855	23.9874	62.3745	57.394	59.1907	1.63248	0.707067	0.00165984	0.0175811
DGAT1	14.1355	16.5339	19.0743	25.4279	29.8927	26.3862	1.63189	0.706548	0.00388944	0.0317777
CTHRC1	168.183	203.131	137.855	319.262	237.049	272.063	1.63145	0.706156	0.000483348	0.00740225
ERBB2	52.2148	42.5159	57.2229	83.6731	80.4114	87.7163	1.63079	0.705574	0.000353163	0.00590516
CD99	147.99	186.204	148.548	228.417	301.02	256.374	1.63029	0.705133	0.00028864	0.00511586
BDH2	20.1936	18.1086	13.2942	27.8186	26.6045	29.5953	1.62939	0.704333	0.00310095	0.0272669
PPP1R14B	81.0627	127.154	86.9904	134.529	206.559	138.349	1.62751	0.702667	0.000936375	0.0116875
S100A16	115.969	144.475	104.331	167.998	249.305	175.433	1.62741	0.702577	0.000341626	0.00579238
R3HCC1	12.1161	16.5339	13.5832	18.6906	24.8109	25.6731	1.62728	0.702466	0.00622275	0.0447372
RPS15	174.818	354.692	192.188	310.351	484.561	377.965	1.62641	0.701694	0.00490085	0.0376839
HSBP1	68.9466	92.1177	45.3737	124.314	114.489	95.2043	1.62567	0.701036	0.00120591	0.0139514
NDUFA8	33.7521	27.1629	17.6293	41.5106	41.2519	44.9279	1.62475	0.70022	0.00472261	0.0366692
ATP6V1F	44.1373	49.9955	27.4554	53.0292	75.9275	68.105	1.62389	0.699452	0.00232857	0.0223195
AKR1C2	267.997	291.706	348.54	564.631	306.699	603.674	1.62379	0.699362	0.00342889	0.0292369
TNFRSF1A	157.51	144.475	97.6836	207.987	223	217.508	1.62367	0.699261	0.000403418	0.00646447
SNAP47	20.7705	20.8643	17.0513	29.3399	33.7788	32.4479	1.62252	0.698235	0.00363641	0.0303826
MRPL17	23.0783	25.9819	12.7162	29.7746	33.4798	36.3702	1.62124	0.6971	0.00675963	0.0475679
ERG28	20.7705	27.1629	19.9413	26.9493	45.138	37.7965	1.61924	0.695317	0.00716062	0.0494988
ATP6V0E1	53.9456	72.4344	39.8826	92.1491	82.205	93.0649	1.61867	0.694805	0.00122529	0.0141387
MRPS21	33.7521	42.5159	23.6984	47.3786	68.1554	45.2844	1.61778	0.694017	0.00376638	0.0311344
ACAA2	62.3115	62.9865	47.9748	95.4091	89.9771	91.9952	1.61667	0.693026	0.000377805	0.00616974
NME4	50.1954	64.5611	55.7779	83.0211	98.0481	93.778	1.61656	0.692925	0.000407466	0.00651799
FKBP5	167.318	101.959	124.85	197.556	250.501	190.409	1.6164	0.69278	0.000640935	0.00893455
TRAFD1	45.5797	48.8145	35.5476	59.5492	85.1942	64.8958	1.61628	0.692677	0.00118637	0.0137733
HOXB4	25.6747	25.5882	26.5884	35.4252	49.9208	41.7187	1.61568	0.692144	0.00296933	0.0264908
TAGLN2	259.92	381.855	270.219	446.836	532.389	492.067	1.61538	0.691878	0.000935953	0.0116875
IAH1	38.6562	32.2806	22.2534	49.5519	50.5187	50.2764	1.61472	0.691284	0.00255595	0.0238933
TMEM98	45.8682	60.6245	39.3046	77.1531	71.7425	84.5072	1.6142	0.690823	0.00131297	0.0148035
GM2A	33.4636	31.0996	24.2764	44.5532	54.1058	44.5713	1.61407	0.690702	0.00134737	0.0151428
ACTA2	52.7917	38.9729	50.8648	79.5438	65.465	87.3598	1.61354	0.690228	0.00124671	0.014262
MYLK	376.466	193.683	245.943	461.615	384.42	471.03	1.61237	0.689183	0.00235891	0.0225428
RNASEH2C	22.2129	24.0136	17.3403	28.6879	32.2841	42.0753	1.61195	0.688806	0.00359643	0.0301814
CSTF2	13.27	17.3213	12.7162	24.3413	23.6152	19.6114	1.6119	0.688764	0.00599395	0.0434922
CBR1	61.4461	55.9005	41.0387	75.1971	87.8846	92.7083	1.61187	0.688737	0.00117426	0.013649
MRPS23	17.8857	18.1086	13.5832	25.2106	30.1916	23.8902	1.6118	0.688675	0.0056551	0.0416934
DGUOK	21.059	29.9186	24.8544	37.3812	40.0562	44.2147	1.61124	0.688176	0.00375382	0.0310513
CIB1	24.5207	40.1539	19.3633	35.8599	52.9101	45.641	1.60926	0.686394	0.00704246	0.0489292
SFXN3	48.176	44.0905	42.7727	73.0238	68.4543	76.3061	1.60669	0.684093	0.000384725	0.00625968
FDFT1	95.4867	118.493	73.9852	126.053	205.363	130.505	1.60639	0.683825	0.00164424	0.0174716
EHD2	450.893	385.792	482.927	664.604	722.507	737.031	1.60549	0.683016	0.00057264	0.00826388
NDUFS2	74.7161	66.5294	54.9109	93.0184	118.076	104.475	1.60532	0.682858	0.000286629	0.0050938
DYNLT1	44.1373	57.0815	36.7036	81.0651	69.3511	68.105	1.60524	0.682793	0.000951189	0.0118137
SLC35B2	72.6968	71.6471	64.737	103.45	124.354	108.397	1.60524	0.682789	0.000164963	0.00333261
SUPT4H1	27.1171	44.8778	20.2303	47.3786	56.7962	42.4319	1.60378	0.681479	0.00724499	0.0498431
IKBKG	40.0986	34.6426	33.2355	56.0719	53.209	65.9655	1.60195	0.679833	0.000643505	0.00894781
TAX1BP3	99.2369	122.43	91.6145	150.177	195.797	154.395	1.6019	0.679785	0.000348992	0.00586492
CD59	520.705	472.398	424.259	731.108	802.32	737.388	1.60184	0.679734	0.000614501	0.0086715
COG8	29.4249	22.4389	26.5884	40.6412	47.5294	39.2227	1.60107	0.679033	0.00278702	0.0254959
HTRA3	26.2516	46.8462	36.9926	47.3786	75.6286	52.4159	1.59926	0.677403	0.00386742	0.0316562
PEX6	22.5014	18.8959	15.6062	29.9919	29.8927	31.7348	1.5992	0.677348	0.00725704	0.0498431
TMA7	57.4074	87.3937	44.2177	89.9758	109.407	101.623	1.59903	0.677196	0.00212674	0.0208794
CHTF8	80.1972	72.0408	60.98	109.536	117.478	114.459	1.59884	0.677026	0.000189736	0.0037245
JRK	27.4055	18.1086	24.2764	33.2519	43.0455	37.7965	1.59869	0.676893	0.00572578	0.0420513
BCL7C	27.1171	40.1539	27.7444	42.1626	56.7962	52.0593	1.59868	0.676885	0.00308011	0.0271872
ARHGEF40	140.201	138.57	131.786	219.506	201.477	236.406	1.5986	0.676807	0.00020759	0.00398194
NUTF2	57.4074	74.7964	60.98	95.6264	111.799	99.1266	1.59832	0.676558	0.000324232	0.0056047
CNN2	149.144	172.425	151.438	236.023	248.109	270.994	1.59768	0.675975	0.000319089	0.0055374
NDUFB4	43.8489	52.3575	35.2586	69.7638	66.9597	70.2444	1.59684	0.675223	0.000863857	0.0109888
MRPL44	17.0203	19.6833	14.4502	23.6893	31.9852	25.6731	1.59643	0.674846	0.00571127	0.0419911
UBE3B	54.8111	52.7512	53.7549	83.6731	78.02	98.0569	1.59488	0.673451	0.000578789	0.00832913
CFL1	519.263	703.48	531.479	866.723	1030.7	897.131	1.59438	0.672995	0.00106944	0.0128652
APOBEC3C	78.7549	49.2082	46.8187	91.9318	99.8417	87.7163	1.59426	0.672887	0.00160082	0.0171611
COPRS	19.6166	24.4073	16.7623	31.2959	34.3766	29.2388	1.5942	0.672831	0.00579246	0.0424472
AURKAIP1	41.541	53.1448	34.6806	57.8105	80.1125	67.3918	1.5938	0.672467	0.00172893	0.0180539
ATP13A2	23.9438	28.3439	28.0334	41.2932	40.6541	46.3542	1.59356	0.672252	0.00210272	0.0207047
WBP1L	55.6765	45.6652	49.7088	79.5438	78.3189	85.5769	1.59205	0.67089	0.000642924	0.00894781
SIRPA	71.5429	71.6471	65.604	125.618	80.4114	125.869	1.59103	0.669964	0.000644246	0.00894877
MRPL10	30.5788	31.8869	26.5884	42.5972	50.2198	49.5633	1.58948	0.668555	0.00167903	0.0177138
PSMB4	85.9668	136.208	90.4584	150.394	181.748	162.953	1.58914	0.668247	0.000707091	0.00952897
UQCRH	56.8304	94.4797	50.8648	96.7131	127.941	95.2043	1.58865	0.667797	0.00197718	0.019881
OGDH	111.641	81.8824	84.6784	133.225	164.111	145.837	1.58572	0.66514	0.000500977	0.00757621
EMP3	130.97	183.448	117.625	212.986	247.213	222.857	1.5856	0.665026	0.000784697	0.0102064
SNX17	86.8323	94.086	60.691	112.578	137.805	131.931	1.585	0.664481	0.000599696	0.00854423
DPYSL2	95.4867	81.8824	77.7422	134.094	137.805	133.714	1.58468	0.664189	0.000213586	0.00406763
TINF2	30.5788	29.5249	29.7675	47.1612	46.3337	49.5633	1.58452	0.664044	0.00107601	0.0129209
MXD4	138.47	128.335	129.474	185.385	241.234	202.532	1.58326	0.6629	0.000360668	0.00597057
OST4	64.6194	122.036	66.4711	125.401	144.382	129.435	1.58295	0.662618	0.00207164	0.0205203
COX7B	32.5982	58.2625	25.7214	60.4185	64.8672	57.7644	1.58181	0.66158	0.00694501	0.0485384
FHOD1	64.3309	60.6245	69.6501	81.4998	122.56	105.188	1.58007	0.659988	0.000621866	0.00875685
ID3	76.1585	154.71	114.446	178.648	176.965	188.626	1.57972	0.659666	0.00166266	0.0175969
PARK7	95.1982	106.29	71.6731	128.444	152.752	149.403	1.5795	0.659464	0.00065418	0.00903952
DCAKD	23.0783	22.8326	17.3403	31.9479	31.0884	37.0833	1.57872	0.658751	0.00460989	0.035962
ZNF358	36.9254	38.9729	40.7496	57.5932	72.6393	53.8421	1.57833	0.658403	0.00114171	0.0134189
MLLT11	32.5982	24.8009	24.2764	54.1159	37.3659	36.3702	1.57315	0.653654	0.00632573	0.0452329
AHNAK2	120.584	97.629	160.687	146.482	260.366	190.409	1.57308	0.653593	0.00270596	0.0249102
VPS18	30.0018	28.3439	28.6115	45.8572	42.4476	49.2067	1.57231	0.652886	0.00194036	0.0195997
NDUFA12	25.9631	35.8235	25.4324	45.8572	40.3552	48.4936	1.5714	0.65205	0.00321814	0.0279053
C8orf82	15.0009	17.7149	17.3403	23.9066	27.5013	27.8125	1.57075	0.651456	0.00693395	0.0485121
PFN1	465.894	701.118	484.372	727.63	982.573	880.372	1.56944	0.650248	0.00249918	0.0235114
NUBP2	20.7705	22.8326	23.9874	30.4266	42.7466	33.5176	1.56843	0.649323	0.00692464	0.0484724
STOML2	48.176	60.6245	34.3915	66.0692	83.9985	73.4535	1.56837	0.649268	0.00330964	0.0285496
CLPP	34.0406	35.4299	29.1895	48.2479	60.0843	45.641	1.56837	0.649267	0.0024812	0.0233919
FUNDC2	19.0396	29.1312	17.6293	28.9053	36.1702	37.0833	1.56606	0.647143	0.00671572	0.047309
TRIM32	25.0977	18.8959	17.9183	36.2946	27.8002	32.8045	1.566	0.647082	0.00719964	0.049691
TECR	40.6756	61.4118	39.8826	68.0252	78.6178	73.8101	1.56599	0.647078	0.00214017	0.0209648
CUEDC2	33.1751	40.5475	34.1025	42.3799	72.3404	54.1987	1.56577	0.646876	0.00341521	0.0291951
PRDX2	66.0618	85.0317	41.3277	84.1078	118.375	98.0569	1.56565	0.646757	0.00450519	0.0353617
ARL3	32.0212	35.4299	21.0973	44.9879	49.024	43.145	1.56507	0.646231	0.00509982	0.038827
PGAP4	30.8673	35.0362	30.3455	49.9865	47.8283	51.7027	1.56354	0.644815	0.00198577	0.0199349
TCTA	21.9244	23.2263	18.7853	30.8613	35.8713	33.161	1.56289	0.644213	0.00476037	0.0368978
DAG1	108.18	112.588	134.098	176.909	193.705	186.486	1.56287	0.644194	0.000300914	0.00526322
AP2S1	61.7346	98.0227	52.0208	101.277	127.343	100.909	1.5626	0.643949	0.0025374	0.0237701
TSPYL1	84.5244	63.3801	58.9569	128.009	88.7814	106.258	1.5623	0.643669	0.00105839	0.0127553
OTUB1	62.6	68.4978	45.0847	80.1958	109.108	85.2203	1.56219	0.643569	0.00222539	0.0215928
LRIG3	19.6166	21.2579	21.9644	38.2506	26.9034	31.7348	1.56217	0.643556	0.00686799	0.048153
HMGB3	31.4442	31.0996	29.7675	50.8559	43.0455	49.5633	1.56199	0.643388	0.001815	0.0186451
PHF19	43.2719	52.7512	50.8648	74.3278	69.65	85.5769	1.56174	0.643157	0.00177661	0.0183893
URM1	32.5982	42.5159	34.6806	50.2039	64.8672	55.625	1.56172	0.643139	0.00164122	0.0174534
SH3D19	49.6184	37.7919	53.4659	86.7158	52.6112	81.2981	1.56145	0.642883	0.00378005	0.0311907
NDRG3	38.0793	28.7376	36.1256	57.5932	51.4155	52.7724	1.56007	0.641615	0.00150033	0.0163608
HDDC2	21.059	24.0136	18.7853	33.0346	36.4691	28.1691	1.55884	0.640475	0.00575483	0.0422413
UROD	41.8295	53.5385	32.6575	54.1159	81.6071	63.113	1.55845	0.640108	0.00423035	0.0337337
TM2D2	49.33	40.5475	29.4785	76.2838	47.5294	61.6867	1.55843	0.64009	0.00559041	0.0413541
PTPA	100.391	95.267	91.3255	129.748	167.399	151.899	1.55804	0.639734	0.000513055	0.00769141
UQCRC1	128.373	137.389	103.753	172.997	225.391	176.146	1.55729	0.639035	0.000604195	0.00858074
MUL1	24.8092	31.0996	23.6984	38.6852	43.0455	41.0056	1.55681	0.638593	0.00470165	0.0365491
DMAC2	29.7134	33.4616	30.3455	40.4239	57.394	48.137	1.55517	0.637074	0.00312911	0.0274375
S100A10	147.413	227.932	207.794	262.973	321.048	321.983	1.55463	0.636573	0.00177529	0.0183893
CDIPT	51.0608	57.0815	50.8648	83.8905	82.5039	78.0889	1.55397	0.635957	0.000947547	0.0117827
EIF6	53.3687	90.9367	57.5119	77.5878	136.012	99.1266	1.55261	0.634696	0.0048327	0.0372844
TXN	180.588	260.213	155.195	314.698	288.764	319.487	1.55188	0.634019	0.0023123	0.0222252
TBCB	43.2719	68.8914	55.1999	79.1091	99.2438	79.8718	1.55142	0.63359	0.00274405	0.0251911
TIMM50	37.5023	42.1222	39.3046	54.1159	71.7425	58.8341	1.5509	0.633105	0.00168409	0.0177249
RUVBL2	53.3687	60.6245	41.0387	74.5452	83.4007	80.9415	1.54992	0.632191	0.00204043	0.0203172
DARS2	36.3484	28.7376	30.0565	53.4639	36.4691	58.121	1.54903	0.631363	0.00600505	0.0435489
UTP3	24.2323	21.6516	16.4733	33.0346	31.0884	31.7348	1.54791	0.630319	0.00703128	0.0488843
DRAP1	113.949	116.525	115.024	161.044	212.537	161.17	1.54721	0.62967	0.000641018	0.00893455
TUBA1C	263.382	326.349	242.186	472.699	286.97	526.298	1.54642	0.628934	0.00509632	0.0388226
VPS29	34.329	31.4932	23.6984	53.6812	41.5509	41.7187	1.54561	0.628177	0.00549084	0.0408449
ID1	55.0995	80.3077	58.3789	108.884	83.6996	104.832	1.54554	0.628115	0.00190133	0.0192934
MYO18A	109.622	72.4344	99.1286	121.054	181.15	133.357	1.54346	0.62617	0.00229584	0.022115
MEIS1	57.1189	60.2308	53.4659	96.4958	60.3833	106.615	1.54315	0.625878	0.00396629	0.032188
SOD1	104.141	118.1	97.3946	149.96	174.573	167.588	1.54235	0.625132	0.000535731	0.00793099
PHB	76.447	97.629	73.6962	104.102	153.649	123.73	1.54201	0.624809	0.00136005	0.0152367
SUCLG1	32.5982	49.2082	27.4554	52.5945	59.4865	54.5553	1.54048	0.623382	0.00460892	0.035962
DPP3	51.9263	40.1539	48.8418	62.8092	89.9771	65.609	1.53956	0.622517	0.00253468	0.0237613
KIAA0930	43.2719	49.2082	47.1078	75.6318	63.3725	73.8101	1.53828	0.621319	0.00150236	0.0163696
GLTP	27.694	28.3439	27.1664	43.0319	42.7466	41.7187	1.53788	0.620942	0.00362528	0.0303087
NDUFS5	81.9281	99.5973	78.3202	110.622	150.958	137.636	1.53755	0.62063	0.00106648	0.0128413
SLC25A11	31.4442	41.3349	30.6345	49.1172	53.8069	54.5553	1.53747	0.620556	0.00278877	0.0254959
FIBP	33.4636	44.0905	30.3455	48.0305	53.8069	63.4695	1.53665	0.619787	0.00365902	0.0304813
ECI2	47.0221	35.4299	32.3685	49.7692	70.5468	57.0513	1.53589	0.619072	0.00401064	0.0324094
BTBD2	75.5816	75.5837	89.3024	123.445	124.653	122.66	1.53499	0.618226	0.000469258	0.00726176
TMED1	24.5207	24.0136	18.7853	33.4693	35.5723	33.8742	1.53476	0.618014	0.0055621	0.0411945
WNT5B	46.7336	66.5294	72.8292	79.7611	116.582	89.1426	1.53396	0.617263	0.00454693	0.0356382
CNN3	148.855	141.72	122.538	198.425	201.776	233.91	1.53171	0.615144	0.000892558	0.0112462
UBTF	92.3134	103.534	96.5275	152.133	131.528	163.309	1.53161	0.615046	0.000765153	0.0100495
MVP	237.418	168.882	195.945	258.409	391.595	272.776	1.53021	0.613734	0.00365077	0.0304453
ECHS1	51.3493	59.4435	42.1947	63.6785	94.461	75.5929	1.53014	0.613667	0.00450634	0.0353617
GSTK1	53.9456	44.4842	40.7496	59.9839	75.6286	79.1586	1.52973	0.613273	0.0027298	0.0250776
ANGPTL4	158.664	199.982	182.073	240.587	313.873	272.063	1.5296	0.613153	0.00162862	0.017375
DUSP1	135.008	162.584	111.556	202.989	203.868	216.438	1.52869	0.612293	0.00125244	0.014303
DYNLRB1	63.4654	74.0091	58.0899	97.5824	104.027	93.4215	1.52746	0.611135	0.00116941	0.0136359
CAPN1	128.662	137.389	130.052	174.518	236.75	193.618	1.52599	0.609746	0.00114927	0.0134601
EXTL3	62.3115	54.7195	52.3098	84.5425	84.5964	90.2123	1.52155	0.605541	0.00217397	0.0212178
PIGS	48.753	35.8235	40.1716	56.9412	67.8565	68.105	1.52138	0.605381	0.00293586	0.0262552
EIF3I	150.586	176.756	146.236	202.12	301.617	216.082	1.521	0.605022	0.00248524	0.0234134
FTH1	3713.59	4093.33	3740.01	4709.38	7452.25	5398.48	1.52075	0.604782	0.00493553	0.0378799
CORO1B	56.5419	66.1358	63.87	72.8065	124.354	86.6466	1.52009	0.604156	0.00521222	0.0392111
ARFGAP2	51.6378	37.0045	42.1947	58.2452	81.0092	60.9735	1.51958	0.603668	0.00404972	0.0327053
NABP2	29.1364	27.5566	26.5884	39.5546	41.2519	47.4239	1.51893	0.603053	0.00529825	0.0397458
ANXA2	1648.66	1823.46	1713.22	2408.7	2782.71	2680.7	1.51817	0.602335	0.00245181	0.0231971
GET3	38.9447	38.9729	38.1486	51.0732	67.8565	58.4775	1.51705	0.601269	0.00263348	0.024429
GMPR2	38.6562	25.9819	27.1664	43.2492	48.4262	49.5633	1.51606	0.600324	0.00582208	0.0425938
CKS1B	32.0212	49.2082	32.0795	62.1572	48.7251	58.8341	1.51595	0.600225	0.00501965	0.0384146
SPARC	1618.66	1830.94	1661.49	2970.07	2038.98	2736.68	1.51576	0.600037	0.00382417	0.0314045
RAB1B	125.489	157.072	136.41	182.342	248.109	203.602	1.5149	0.59922	0.00170832	0.017909
PDLIM7	122.604	152.742	156.062	203.206	226.886	222.143	1.51235	0.596796	0.00142123	0.0156653
UCK2	32.0212	24.4073	34.1025	44.9879	49.6219	44.9279	1.51222	0.596668	0.00553702	0.0411193
TMEM129	31.1558	26.3756	27.1664	38.6852	41.8498	50.2764	1.51033	0.594862	0.00626257	0.0449262
PKM	1272.77	1494.75	1285.78	1870.37	2218.94	2027.82	1.50964	0.594202	0.00316061	0.0275721
ARHGAP1	90.5825	86.2127	91.9035	114.317	147.969	146.194	1.50962	0.594183	0.00109709	0.0130702
MPDU1	40.3871	55.5068	52.5988	67.8078	80.4114	74.8798	1.50637	0.591076	0.00368825	0.0306712
PMPCA	46.4452	32.6742	37.8596	53.8985	68.7532	55.2684	1.50603	0.590755	0.00420559	0.0335967
LDB1	115.392	101.959	107.221	139.745	188.025	162.953	1.50501	0.589778	0.00139496	0.0154914
COG4	60.5807	55.9005	56.0669	86.2811	91.7706	81.6546	1.50434	0.589134	0.00183599	0.0188026
COMT	78.4664	105.502	79.1873	113.882	164.709	115.885	1.5028	0.58765	0.00314972	0.0275636
COPS6	95.4867	93.6924	86.1234	118.229	179.356	115.885	1.50171	0.586603	0.0032048	0.027844
MED24	68.3696	67.7104	72.8292	91.4971	117.179	107.328	1.50114	0.586055	0.00116864	0.0136359
PSKH1	38.3677	34.6426	36.1256	50.4212	56.1983	59.9038	1.50036	0.585308	0.00283563	0.0257098
ACTR1A	160.106	161.403	146.525	213.203	257.077	231.414	1.49765	0.582704	0.00189944	0.0192889
COLGALT1	135.585	109.833	145.369	174.084	209.548	205.028	1.49689	0.58197	0.00168091	0.0177152
PRDX5	76.447	113.769	58.6679	107.797	141.691	121.947	1.49665	0.58174	0.00620515	0.0446689
GRHPR	50.1954	59.8371	44.2177	68.2425	86.9878	74.5232	1.49597	0.581081	0.00545776	0.0406885
G6PC3	37.7908	40.5475	34.1025	43.6839	70.5468	54.1987	1.49505	0.580194	0.00697035	0.0486133
MMP2	587.055	584.593	610.956	951.483	689.625	1023	1.49427	0.579437	0.00508238	0.038783
VDAC3	61.7346	66.1358	45.6627	92.3664	77.721	87.0032	1.49239	0.577621	0.00394942	0.0321098
TNFRSF12A	88.8516	128.335	89.5914	129.748	180.552	146.194	1.49164	0.576903	0.00383262	0.0314294
FAM120B	42.9834	30.7059	31.5015	51.7252	51.7144	55.625	1.49155	0.576808	0.00516161	0.0389962
MYL9	237.418	262.181	242.186	375.768	294.443	435.372	1.4904	0.575698	0.00362404	0.0303087
GLB1	66.3502	76.7647	51.1538	84.7598	115.984	87.3598	1.48755	0.572942	0.00591146	0.0431053
GPX4	106.16	177.937	96.5275	170.824	205.363	188.626	1.48737	0.572765	0.00579836	0.042467
NOP9	51.3493	37.3982	39.5936	58.2452	65.465	69.8878	1.48714	0.57254	0.00490852	0.0377162
WDTC1	55.6765	58.6561	57.2229	76.7185	98.6459	80.2283	1.48711	0.572508	0.0043653	0.0346022
NELFE	49.0415	49.2082	47.6858	60.8532	90.5749	65.9655	1.48627	0.5717	0.0058836	0.0429493
GABARAP	122.604	135.027	101.152	148.656	210.445	173.65	1.48576	0.571201	0.00270588	0.0249102
BEX3	135.008	159.828	98.8396	198.642	197.292	186.843	1.48528	0.570737	0.00310771	0.0273039
PCDH9	49.6184	58.2625	66.4711	106.276	69.3511	82.3678	1.48503	0.570491	0.00633775	0.0452701
ANP32A	54.5226	53.1448	43.3507	70.8505	85.7921	66.6787	1.48345	0.56896	0.0065836	0.0465607
COL5A2	965.252	930.231	1141.28	1659.99	1156.85	1685.51	1.4824	0.567938	0.00711494	0.0492599
NTAN1	40.3871	44.4842	35.5476	60.4185	57.9919	57.7644	1.48161	0.567168	0.00354446	0.0299152
HAX1	40.3871	47.2398	30.6345	53.0292	65.764	55.2684	1.48153	0.567085	0.00698727	0.0486801
MOGS	62.0231	63.3801	54.9109	77.3705	93.8631	97.3437	1.48125	0.566811	0.00364319	0.0304201
ATP5PO	60.0037	76.3711	55.7779	87.5851	94.461	100.909	1.4806	0.566181	0.00414393	0.0332039
CTSB	795.626	783.788	836.957	1009.95	1435.45	1131.75	1.47986	0.565462	0.00571623	0.0420043
VPS16	34.329	31.4932	38.1486	44.9879	61.2801	49.2067	1.47972	0.565329	0.0072778	0.0498936
TNS2	120.296	87	99.7066	133.66	166.801	156.534	1.47971	0.565311	0.00283923	0.0257098
C12orf75	72.4083	89.7557	80.3433	118.881	120.169	116.242	1.4794	0.565011	0.00145833	0.0160079
MXRA7	144.817	169.276	152.305	214.29	232.565	242.468	1.47878	0.56441	0.00233556	0.0223525
KANK2	233.38	244.86	266.462	365.988	322.542	413.622	1.47804	0.563684	0.00334919	0.0287974
LRRC41	114.238	111.801	95.0825	153.002	160.823	159.03	1.47372	0.559461	0.00175817	0.0182874
PLEKHO1	60.5807	78.7331	70.8061	86.7158	129.435	93.0649	1.47347	0.559222	0.00416019	0.033294
PTGR1	93.4673	105.896	95.9495	139.962	151.556	141.202	1.47166	0.557447	0.00202228	0.0202035
NAGA	40.3871	41.3349	40.7496	60.4185	58.8886	60.617	1.47064	0.556442	0.00366198	0.0304813
ADH5	110.776	108.258	76.0082	146.048	140.197	146.55	1.47044	0.556247	0.0036151	0.0302808
SH3BGRL3	321.077	326.349	341.025	417.062	552.118	485.292	1.46957	0.555394	0.00571023	0.0419911
SOX12	56.2535	52.3575	58.6679	75.6318	89.0803	84.5072	1.46936	0.555188	0.00524983	0.0394494
RBM8A	73.5622	69.2851	64.159	95.4091	113.293	95.9174	1.46887	0.554705	0.002079	0.020541
TAF10	39.2332	43.3032	40.4606	56.5065	63.3725	60.9735	1.46788	0.553736	0.00437066	0.034624
PSMD8	101.545	131.091	115.891	150.394	200.281	159.744	1.46694	0.552809	0.00329435	0.0284547
PLIN3	111.93	134.24	115.313	154.524	200.281	173.65	1.46353	0.549451	0.0027	0.0248898
ARHGEF17	84.5244	66.5294	117.625	121.924	144.681	128.009	1.463	0.548926	0.00656981	0.0465295
PRMT2	62.0231	71.2534	67.0491	89.3238	109.706	93.4215	1.46114	0.547094	0.00356361	0.0300006
IGF2BP3	117.123	86.2127	71.3841	146.7	118.973	135.497	1.45993	0.545895	0.00568114	0.0418622
SLC35A4	41.541	43.3032	43.3507	58.6799	66.3618	63.113	1.45992	0.545886	0.00494488	0.0379297
POLR2E	111.93	138.177	106.354	151.481	195.498	171.867	1.45842	0.54441	0.00379559	0.0312607
PHGDH	122.892	174.394	116.18	190.384	211.341	197.897	1.4553	0.541321	0.00526434	0.0395138
SLC25A1	77.024	85.0317	78.6093	95.6264	135.713	119.451	1.45434	0.540366	0.00339299	0.0290612
NYNRIN	32.3097	42.9095	42.7727	55.8545	51.7144	63.8261	1.45389	0.539922	0.00727172	0.0498777
PSMB5	92.8903	125.186	78.3202	135.181	150.36	143.341	1.45301	0.539048	0.00605275	0.0438231
PEDS1	42.9834	38.1855	34.1025	52.1599	53.508	63.4695	1.44994	0.535994	0.00700949	0.0487741
SLC39A1	62.3115	79.1267	66.1821	89.3238	101.934	109.467	1.44966	0.535716	0.00356346	0.0300006
PSMB7	109.622	142.901	108.666	159.74	210.744	151.542	1.44923	0.535285	0.00545997	0.0406885
ADI1	87.4092	110.62	79.4763	125.401	135.414	136.923	1.44096	0.527025	0.00414913	0.0332255
RAB11B	62.6	61.4118	77.7422	81.7171	112.696	98.0569	1.44078	0.526849	0.00722324	0.0498021
TUBB6	149.144	172.425	166.756	248.629	209.548	241.042	1.43699	0.523051	0.00511016	0.0388835
PHLDB1	182.03	184.629	165.311	241.239	247.811	277.055	1.43689	0.52295	0.00490149	0.0376839
NRP2	176.261	197.62	202.014	284.923	255.284	285.613	1.43673	0.522789	0.00547126	0.0407448
SMPD1	84.236	85.0317	72.5402	109.318	115.984	122.304	1.43405	0.520099	0.00318509	0.0277272
DHCR24	129.239	137.389	152.594	169.52	242.43	190.052	1.43381	0.51985	0.00659281	0.0465913
PSMA7	125.777	164.158	126.006	169.737	224.195	201.462	1.43351	0.519554	0.00674801	0.0475113
TRIM16	145.971	140.932	110.689	169.302	187.726	213.229	1.4325	0.518536	0.00545949	0.0406885
ILK	132.412	155.891	144.213	171.476	237.946	207.524	1.42564	0.511606	0.00695047	0.048551
ARPC1B	121.161	149.986	119.07	165.39	206.26	182.207	1.42265	0.508583	0.00516311	0.0389962
MARCKSL1	70.9659	83.0634	72.2512	96.4958	118.076	105.901	1.41824	0.504099	0.00556047	0.0411945
PRSS12	91.7364	91.3304	108.088	138.441	129.734	147.264	1.4177	0.503553	0.0059637	0.0433673
ATP5PD	76.447	84.2444	58.0899	94.7571	108.212	105.545	1.41441	0.500197	0.0072569	0.0498431
RNPEP	78.7549	76.3711	73.6962	109.536	97.1513	117.312	1.41264	0.498394	0.00532779	0.0399449
ARF3	127.219	114.163	111.267	158.653	188.922	150.473	1.41112	0.496844	0.00658473	0.0465607
CTSC	64.6194	79.9141	76.5862	103.885	98.9449	106.971	1.4092	0.494875	0.00537561	0.0402807
SHISA5	128.085	125.186	123.116	165.39	193.705	168.658	1.39884	0.484229	0.00593461	0.0432504
MED1	123.758	122.43	146.236	93.2358	97.1513	92.7083	-1.3918	-0.476947	0.00726846	0.0498777
SMURF2	107.603	106.29	114.446	86.4985	71.4436	75.5929	-1.39348	-0.478691	0.00686965	0.048153
PAPSS2	157.51	148.805	177.738	116.49	110.902	118.738	-1.40561	-0.4912	0.00637224	0.0454133
USP7	171.357	164.946	209.817	132.138	118.973	138.349	-1.4062	-0.491799	0.0064638	0.0459483
NBAS	133.854	118.887	121.382	96.9304	75.0307	92.7083	-1.41152	-0.497252	0.00653309	0.0463417
CCDC47	101.833	97.629	120.515	76.9358	70.8457	78.4455	-1.42109	-0.507001	0.00501596	0.0384085
PPP6R3	109.334	85.819	118.781	78.4571	75.9275	66.3221	-1.42368	-0.509627	0.00554112	0.0411268
BIRC6	171.357	162.584	201.436	145.178	105.521	123.73	-1.42749	-0.513478	0.00556264	0.0411945
ANTXR2	142.509	125.973	148.259	99.3211	101.336	91.6386	-1.42915	-0.51516	0.00444015	0.0349662
CHD9	141.643	122.824	130.341	106.928	77.4221	90.9255	-1.42935	-0.515363	0.00520662	0.0392111
ARIH2	88.5631	105.109	115.024	66.7212	77.4221	72.0272	-1.43136	-0.517386	0.0044195	0.0348867
NDEL1	97.506	107.077	124.561	78.6745	70.2479	80.9415	-1.43343	-0.519467	0.0042198	0.03369
YY1	161.548	158.253	202.303	111.926	130.93	121.947	-1.43699	-0.523053	0.00423326	0.0337367
PTPN13	200.782	137.389	159.242	129.748	99.5427	116.599	-1.43856	-0.524626	0.00657006	0.0465295
ZFP91	142.509	138.57	150.86	112.361	89.0803	96.274	-1.44184	-0.527913	0.00397339	0.0322177
RBM39	248.381	255.882	278.6	188.862	157.834	196.114	-1.44318	-0.529254	0.00511785	0.0389197
BACH1	65.4848	66.1358	67.3381	48.4652	42.7466	45.641	-1.44496	-0.531033	0.00568824	0.0418913
MYADM	107.891	122.036	129.763	68.4598	97.1513	84.1506	-1.44605	-0.53212	0.00419211	0.0335092
PITPNB	77.3125	83.8507	82.3663	61.2878	49.9208	54.9118	-1.44667	-0.532733	0.00695573	0.0485622
NPM1	877.554	931.806	889.556	632.438	611.605	616.154	-1.4483	-0.534361	0.00648541	0.0460526
KHSRP	241.746	272.023	362.99	191.905	209.847	203.958	-1.44883	-0.534887	0.0072349	0.0498391
GNPNAT1	102.41	97.2353	112.134	93.0184	58.2908	62.3998	-1.45092	-0.536964	0.00632489	0.0452329
SMG7	119.43	111.407	151.727	81.9345	93.8631	89.1426	-1.45144	-0.537489	0.00364846	0.030445
KCMF1	79.6203	100.778	102.308	66.9385	57.0951	70.2444	-1.45217	-0.538207	0.00627805	0.0449887
EIF2S3	159.818	134.634	131.786	101.929	101.635	89.1426	-1.45267	-0.538706	0.00338948	0.0290499
PIKFYVE	90.0055	72.8281	96.5275	59.9839	61.579	58.121	-1.45439	-0.540418	0.00546065	0.0406885
TPR	275.209	220.059	269.93	193.209	156.937	176.146	-1.45441	-0.540433	0.00455144	0.0356382
CYLD	66.6387	57.4751	61.847	42.8146	48.1273	36.7268	-1.45506	-0.541082	0.00699771	0.0487274
ITPRID2	218.667	212.186	254.035	165.39	159.029	145.124	-1.45638	-0.542386	0.003769	0.0311344
UBE3A	107.314	94.086	95.9495	83.8905	54.7037	64.1827	-1.45834	-0.544332	0.00552663	0.0410651
MATR3_1	282.71	251.158	289.872	207.987	167.698	188.269	-1.45937	-0.545342	0.00411733	0.0331079
SMURF1	68.6581	62.5928	84.1003	45.6399	46.9316	56.6947	-1.46038	-0.546345	0.00725349	0.0498431
IPO5	358.291	394.453	497.377	312.959	251.996	290.248	-1.46132	-0.547273	0.00662867	0.0467702
DYM	73.5622	75.1901	65.8931	51.0732	46.3337	47.7804	-1.46327	-0.549198	0.00427424	0.0339818
MIB1	111.93	93.6924	105.776	76.7185	68.4543	67.0352	-1.46359	-0.549508	0.0020788	0.020541
VPS13B	101.256	91.724	120.515	81.2825	76.8243	54.9118	-1.46605	-0.551933	0.0042474	0.033829
TOB2	103.564	105.109	124.272	74.5452	73.5361	80.5849	-1.46613	-0.552012	0.00194956	0.0196777
RFC1	91.4479	77.5521	87.8574	60.6359	50.5187	65.2524	-1.46709	-0.552953	0.00460032	0.0359296
DIAPH1	126.354	142.113	219.065	104.754	110.304	117.668	-1.4675	-0.553361	0.00641514	0.0456512
SPATS2	95.7751	89.362	99.1286	64.1132	62.1768	68.8181	-1.46868	-0.554522	0.00312589	0.0274375
TCERG1	90.871	86.2127	94.7935	64.3305	65.764	53.8421	-1.46888	-0.554715	0.00353277	0.0298545
CANX	1153.34	1172.73	1231.74	852.814	794.249	766.983	-1.47084	-0.556643	0.00467545	0.036388
BPTF	161.837	138.964	221.667	133.877	102.233	118.738	-1.47282	-0.55858	0.00515165	0.0389962
UBXN7	126.354	124.792	135.543	96.0611	83.4007	80.2283	-1.47395	-0.559692	0.00169518	0.0177853
USP24	139.624	149.986	191.321	112.361	101.336	112.676	-1.47487	-0.560589	0.00257723	0.023991
MBD2	57.9843	70.4661	76.5862	46.7266	43.6434	48.4936	-1.47499	-0.560704	0.00514848	0.0389962
OPTN	104.43	118.1	133.52	72.8065	95.3577	73.4535	-1.47512	-0.560828	0.00256506	0.023935
SRP72	180.011	155.498	171.091	139.093	97.1513	105.901	-1.47542	-0.561129	0.0029865	0.0265372
UBR5	304.346	251.158	328.887	210.161	185.335	204.671	-1.4759	-0.561593	0.00357264	0.0300577
MCFD2	289.633	240.136	260.682	209.291	150.659	174.72	-1.4762	-0.561885	0.00398424	0.0322549
ACSL3	191.55	168.095	167.334	142.136	110.005	102.692	-1.47785	-0.563504	0.0024599	0.0232571
DCAF10	64.6194	67.7104	52.5988	47.3786	37.9637	37.7965	-1.4782	-0.563844	0.00580391	0.0424843
DDR2	373.292	313.358	296.23	246.673	189.52	228.205	-1.47835	-0.563989	0.00414014	0.0331938
MAP1LC3B	158.952	150.774	199.413	119.316	121.065	103.762	-1.4791	-0.564723	0.00231933	0.0222605
ARMCX3	124.335	105.502	115.602	99.3211	56.1983	77.3758	-1.47915	-0.564766	0.00452357	0.035476
TAX1BP1	160.971	146.444	154.039	128.009	78.6178	104.475	-1.47942	-0.565032	0.00375271	0.0310513
GSK3B	101.545	102.353	128.607	81.7171	80.4114	61.6867	-1.47985	-0.565446	0.00262822	0.0244144
CDK6	138.47	163.371	201.147	132.79	107.315	98.77	-1.47987	-0.565472	0.00358474	0.0301404
TIPARP	208.282	217.303	217.042	168.65	115.685	148.69	-1.48006	-0.565657	0.0031288	0.0274375
WAPL	92.0249	81.4887	81.7883	71.2852	48.4262	51.3461	-1.48039	-0.565976	0.00714014	0.0493832
HELZ	77.3125	63.3801	98.2616	56.7239	52.6112	52.4159	-1.48152	-0.567078	0.00636403	0.0454091
KBTBD2	58.2728	54.3258	60.402	48.6825	35.8713	30.6651	-1.48167	-0.567228	0.00653911	0.0463597
NUP153	116.546	110.62	147.681	92.5838	71.7425	88.786	-1.48186	-0.56741	0.0025538	0.02389
PRRC2C	385.12	346.426	530.612	278.838	264.849	308.077	-1.48347	-0.568972	0.00554681	0.0411461
SREK1	97.7945	74.7964	84.6784	57.8105	55.8994	61.3301	-1.48393	-0.569424	0.00342813	0.0292369
NUMB	130.104	121.249	172.825	89.3238	104.923	92.3517	-1.48454	-0.570014	0.00293535	0.0262552
TNKS2	123.469	117.312	128.318	98.0171	69.65	79.5152	-1.48491	-0.570379	0.00185183	0.0189212
TMEM39A	80.1972	84.2444	69.0721	53.0292	51.4155	51.3461	-1.48494	-0.570403	0.00372699	0.0309063
SMARCA5	162.702	138.177	157.219	119.098	91.7706	96.274	-1.48603	-0.571462	0.00211784	0.0208228
DYRK1A	53.3687	51.1765	53.1768	36.7292	35.8713	32.8045	-1.48776	-0.573141	0.00347577	0.0295298
TAOK3	66.0618	70.4661	102.019	56.0719	52.6112	51.7027	-1.48793	-0.573309	0.00678431	0.0477163
FAM168B	197.897	212.579	243.92	151.698	140.795	146.55	-1.48953	-0.574854	0.0018822	0.0191431
ZNF469	109.911	128.335	197.101	96.9304	97.4502	98.0569	-1.48987	-0.575189	0.00564495	0.0416417
TRIM37	45.8682	46.8462	41.6167	34.1212	26.9034	26.7428	-1.49204	-0.577286	0.0068778	0.04817
KAT6A	101.833	96.8417	120.515	71.5025	72.3404	70.9575	-1.49352	-0.57872	0.00112321	0.0133073
VPS13C	83.3705	65.3484	66.7601	57.5932	41.5509	44.2147	-1.49399	-0.579168	0.00499044	0.0382572
SBDS	87.6977	95.6607	95.6605	69.7638	53.209	61.6867	-1.49465	-0.579803	0.00250948	0.0235916
SNX9	182.319	186.991	224.268	119.316	140.197	139.062	-1.49651	-0.5816	0.00179339	0.0184991
TBX3	315.885	346.819	514.717	264.711	257.077	265.288	-1.49651	-0.581601	0.00509122	0.0388078
P4HA1	141.355	146.837	143.924	105.624	98.0481	81.2981	-1.49679	-0.581867	0.00153747	0.0166702
CDV3	202.224	218.484	222.245	159.305	121.962	146.55	-1.49767	-0.582716	0.00177765	0.0183893
EDEM1	107.026	120.462	110.689	75.6318	83.9985	63.8261	-1.49814	-0.583168	0.00125713	0.0143443
TRAPPC10	76.447	86.6064	119.937	62.3745	55.8994	70.9575	-1.49952	-0.5845	0.00561958	0.0415006
TFRC	287.614	341.702	384.087	231.459	241.234	202.175	-1.49958	-0.584555	0.00263303	0.024429
PDZD8	49.0415	53.1448	58.0899	36.0772	33.1809	37.7965	-1.49963	-0.58461	0.002937	0.0262552
ZNF598	70.6774	79.1267	103.464	56.9412	60.0843	51.7027	-1.50027	-0.585218	0.00432954	0.0343803
RCOR1	57.9843	41.3349	57.2229	38.9026	31.3873	34.2308	-1.50095	-0.585879	0.00584002	0.0427015
ETF1	177.703	180.299	177.449	122.141	115.685	117.312	-1.50233	-0.587199	0.00078336	0.010199
VPS37A	67.5042	54.7195	59.824	47.3786	32.5831	40.649	-1.5027	-0.587558	0.00442144	0.0348867
NAP1L1	440.508	460.982	416.745	341.212	257.077	276.342	-1.50287	-0.587722	0.00329987	0.0284839
ZFAND3	92.6019	91.724	107.51	61.2878	67.2586	67.7484	-1.50392	-0.588723	0.00186899	0.0190379
REPS1	67.5042	62.1991	78.8983	41.5106	55.0026	43.145	-1.50426	-0.589056	0.00407728	0.0328701
MAP3K20	162.414	155.104	178.894	123.88	108.212	95.9174	-1.5048	-0.589567	0.00126143	0.0143687
STT3B	243.188	233.837	197.101	192.122	121.065	133.001	-1.50626	-0.590967	0.0033607	0.0288777
MTSS2	185.204	218.484	245.654	122.358	180.552	128.365	-1.50638	-0.591082	0.00306909	0.0271259
SLFN5	220.398	188.959	168.49	136.05	112.397	134.784	-1.50725	-0.591921	0.00136721	0.0152853
BTAF1	113.661	90.9367	126.295	79.1091	63.0736	77.7324	-1.50867	-0.593276	0.00166706	0.0176154
KDM2A	146.259	157.86	239.296	115.404	125.549	119.451	-1.50955	-0.594115	0.00248828	0.0234254
ZEB1	124.046	116.919	149.415	98.6691	68.1554	91.6386	-1.50965	-0.59421	0.00190409	0.0193067
XPO5	54.2341	69.2851	85.5454	46.7266	43.6434	48.137	-1.5098	-0.594355	0.00459911	0.0359296
MAP1B	379.062	380.674	535.526	307.091	256.778	294.171	-1.50988	-0.594438	0.00369971	0.0307376
PALM2AKAP2	170.78	172.425	272.531	143.005	133.023	131.931	-1.50989	-0.594448	0.00316105	0.0275721
HIPK1	92.3134	103.534	132.942	73.8932	72.9382	70.9575	-1.51	-0.59455	0.00155858	0.0168683
TANC2	228.764	224.783	350.274	183.212	161.122	188.269	-1.5105	-0.595022	0.00379478	0.0312607
PUM2	109.334	111.407	141.612	83.2385	79.5146	77.0192	-1.51111	-0.595604	0.000938366	0.0117014
USP32	99.8138	71.2534	107.51	56.9412	58.2908	70.6009	-1.51135	-0.595839	0.00347701	0.0295298
UBA2	120.007	119.674	120.515	81.9345	77.4221	78.0889	-1.51157	-0.596048	0.000600433	0.00854557
ZEB2	114.815	114.557	157.508	103.45	61.2801	90.9255	-1.512	-0.596462	0.00408002	0.0328701
EMP1	290.21	334.222	367.614	234.502	193.107	227.849	-1.51219	-0.596636	0.00207851	0.020541
TNKS	124.912	116.525	138.144	93.8878	72.0414	84.5072	-1.51229	-0.596733	0.00113248	0.0133576
PTGS1	620.519	559.005	675.982	382.071	449.885	395.793	-1.51358	-0.597963	0.00283901	0.0257098
RPS6KC1	63.177	54.3258	55.7779	38.6852	37.067	39.2227	-1.51437	-0.59872	0.00193561	0.0195765
TTC37	192.704	165.339	206.349	146.917	100.44	124.8	-1.51476	-0.599085	0.00140061	0.0155152
HSP90AA1	1872.23	1771.49	2452.2	1546.54	1049.83	1425.21	-1.51579	-0.600067	0.00540261	0.0404192
NUP98	140.778	164.552	215.019	113.013	109.407	121.234	-1.51598	-0.600247	0.00171599	0.0179612
PPIG	60.0037	58.6561	64.159	48.8999	31.0884	39.5793	-1.51601	-0.600275	0.0037162	0.0308361
SH2B3	69.812	67.3168	71.0951	46.5092	41.2519	50.2764	-1.51648	-0.600729	0.00208433	0.0205694
NID2	477.722	359.416	547.953	261.886	344.962	307.007	-1.51772	-0.601903	0.00441743	0.0348867
EHBP1	81.0627	65.7421	77.1642	56.5065	36.1702	54.9118	-1.51807	-0.602237	0.0047268	0.0366738
HSP90AB1	1458.55	1677.8	2113.78	1108.83	1184.95	1164.56	-1.51832	-0.602478	0.00332227	0.02864
REST	61.7346	61.8055	69.9391	50.2039	32.5831	43.8582	-1.51923	-0.603342	0.00365999	0.0304813
POM121C	93.7558	86.6064	129.763	68.8945	77.1232	58.121	-1.51968	-0.603764	0.00207991	0.020541
AZIN1	142.509	143.294	117.914	123.445	61.2801	79.8718	-1.52024	-0.604303	0.00515048	0.0389962
NEMP1	49.33	44.8778	46.2407	37.8159	22.4195	31.3782	-1.52037	-0.60442	0.00661745	0.046716
NIBAN1	124.623	127.154	126.873	85.8465	85.7921	75.2364	-1.52157	-0.605557	0.000601255	0.00854812
ZFAND5	164.433	162.977	166.467	122.358	94.7599	105.188	-1.52176	-0.605743	0.00081121	0.0104389
ARFGEF2	112.218	100.778	131.208	84.3251	76.8243	64.1827	-1.52211	-0.606072	0.00102545	0.0124601
RSL1D1	117.988	126.76	136.41	86.2811	81.6071	81.2981	-1.52312	-0.607034	0.000630636	0.00883355
PRNP	156.644	147.231	160.687	114.1	96.8524	91.282	-1.52462	-0.608453	0.000834972	0.0107239
STXBP5	161.548	142.507	187.275	114.317	112.098	95.5609	-1.52476	-0.608586	0.000984585	0.0121392
YTHDF3	108.757	90.1494	108.088	77.3705	61.579	61.3301	-1.52558	-0.609356	0.00096873	0.0119567
DLG4	60.5807	43.3032	62.714	33.4693	42.4476	34.2308	-1.5264	-0.610137	0.00356356	0.0300006
RBMX	211.744	211.398	200.858	147.352	127.642	129.792	-1.52726	-0.610944	0.000763851	0.0100434
MYCBP2	148.567	145.656	217.62	120.62	101.635	113.033	-1.5273	-0.610979	0.00168183	0.0177152
EDEM3	112.218	114.95	113.579	86.2811	65.764	68.4615	-1.52731	-0.610995	0.00072043	0.00966364
PPP4R2	66.9272	65.3484	63.581	51.2905	33.7788	41.7187	-1.52829	-0.611914	0.00280521	0.025611
CSNK1G1	49.0415	36.6109	54.6219	36.9466	26.3056	28.1691	-1.52947	-0.613034	0.00667643	0.0470821
TTLL7	51.0608	41.7285	49.1308	37.1639	21.5228	33.8742	-1.53027	-0.613786	0.00723609	0.0498391
CSRNP2	65.7733	66.1358	72.8292	46.2919	45.7358	41.0056	-1.53056	-0.61406	0.00149145	0.0163002
GNA13	102.699	96.0543	96.5275	79.3265	50.5187	61.6867	-1.53202	-0.615432	0.00224724	0.0217889
SWAP70	58.5613	59.8371	66.4711	42.3799	42.7466	34.2308	-1.53227	-0.615669	0.00180081	0.0185567
BAZ1B	197.608	215.335	310.391	159.957	156.638	154.752	-1.53526	-0.618484	0.00206581	0.0204779
GSPT1	175.107	205.887	247.099	159.088	105.521	144.054	-1.53534	-0.618561	0.00199376	0.0199872
RAB21	48.4645	49.2082	56.9339	38.6852	32.882	27.4559	-1.53563	-0.618826	0.00385273	0.0315748
KAT6B	82.2166	75.9774	105.776	56.0719	55.3015	61.6867	-1.53582	-0.619007	0.00185109	0.0189212
LHFPL2	48.176	44.4842	46.8187	29.1226	27.2024	36.0136	-1.53629	-0.619451	0.00306186	0.027098
PCNT	119.43	135.027	212.129	96.2784	112.994	94.4912	-1.53712	-0.620228	0.00302999	0.0268697
RABEP1	87.6977	70.4661	102.597	58.0279	52.3122	60.2604	-1.53756	-0.620646	0.00189216	0.0192298
SRSF3	167.895	209.43	208.083	144.309	116.283	118.025	-1.53808	-0.621133	0.000793893	0.0103001
EIF2A	113.949	109.833	99.1286	72.5892	67.2586	68.8181	-1.53813	-0.62118	0.000388887	0.00631194
SEC24D	355.983	400.358	466.164	264.059	253.49	277.412	-1.53882	-0.621824	0.00161909	0.0172872
TOP1	188.954	159.434	184.096	126.053	101.934	118.025	-1.53905	-0.622041	0.000615782	0.00868037
DPY19L3	57.9843	60.2308	45.6627	41.7279	32.2841	30.6651	-1.54004	-0.622972	0.00293315	0.0262552
ASAP1	161.548	170.457	247.388	136.92	108.511	130.861	-1.54006	-0.622987	0.00128666	0.0145857
CCDC88A	119.142	99.2037	116.758	97.5824	55.3015	63.4695	-1.54263	-0.625391	0.00242575	0.0229833
ELK3	142.797	140.145	195.367	94.9744	127.044	88.0729	-1.54363	-0.626329	0.00163567	0.0174222
TPP2	86.5438	96.448	85.5454	68.8945	50.2198	52.4159	-1.54445	-0.627091	0.00161007	0.0172289
ARHGAP21	318.481	296.824	440.443	235.154	220.01	228.562	-1.54517	-0.627768	0.00152957	0.0166115
AZI2	73.8507	54.3258	55.1999	46.0746	35.2734	36.7268	-1.54576	-0.628318	0.00253087	0.0237591
MBNL1	161.837	166.52	194.211	131.269	98.0481	107.328	-1.54657	-0.629073	0.000721344	0.00966615
CDC42BPA	183.473	177.937	219.065	149.09	105.82	119.451	-1.54677	-0.62926	0.000707522	0.00952897
SNX5	83.082	86.6064	83.8113	60.8532	52.3122	47.4239	-1.54712	-0.629587	0.00161234	0.0172289
MED13	104.718	99.2037	115.602	84.3251	57.394	63.4695	-1.5481	-0.630495	0.000866905	0.0110065
SCD	495.031	722.376	597.662	365.988	421.188	384.383	-1.54835	-0.630735	0.00219718	0.0213659
BRD1	53.6572	58.2625	83.2333	39.9892	40.3552	46.3542	-1.54851	-0.630876	0.00302604	0.0268526
SIK3	62.6	60.2308	94.2155	48.6825	48.4262	43.145	-1.54885	-0.631193	0.00284702	0.0257452
KMT5B	54.5226	45.2715	50.2868	37.1639	27.2024	31.7348	-1.55014	-0.632396	0.00348687	0.029567
KCNE4	64.9078	72.8281	71.0951	34.7732	64.2693	35.657	-1.55104	-0.633238	0.0061791	0.0445273
INHBA	171.357	152.348	210.395	113.882	139.599	90.5689	-1.55197	-0.634096	0.0012771	0.0145223
PDIA4	482.049	524.362	456.049	286.662	311.781	345.16	-1.55253	-0.634621	0.00140355	0.015522
PFKFB3	40.6756	60.6245	76.0082	35.4252	36.768	42.0753	-1.55461	-0.636548	0.00466592	0.0363565
STX2	66.3502	73.2218	84.3893	54.1159	42.1487	46.7107	-1.55541	-0.637291	0.00174122	0.0181253
HEXIM1	82.5051	107.471	164.444	67.1558	86.3899	74.5232	-1.5558	-0.637658	0.00314293	0.0275405
ITGA4	62.8885	51.1765	64.448	39.5546	42.4476	32.8045	-1.55597	-0.637818	0.00152412	0.0165795
SERPINB8	46.4452	40.1539	36.4146	28.9053	29.2949	19.6114	-1.55849	-0.640152	0.00681065	0.0478327
SECISBP2	46.1567	38.5792	54.0439	30.6439	31.3873	27.4559	-1.55891	-0.640535	0.00304152	0.026936
MDN1	89.1401	82.6697	161.265	68.4598	67.5575	78.0889	-1.55909	-0.640703	0.00381415	0.0313553
DMXL1	64.3309	53.5385	53.1768	43.2492	28.9959	36.7268	-1.55969	-0.641261	0.00214554	0.0210019
CEP170B	145.105	150.38	213.574	104.754	109.407	112.676	-1.56086	-0.642338	0.000776253	0.0101562
TMEM131	148.278	111.407	158.086	99.3211	89.6781	78.4455	-1.56102	-0.642487	0.000782186	0.010199
CLUH	82.5051	87.3937	136.41	54.1159	84.5964	57.7644	-1.56162	-0.643045	0.00389792	0.0318079
CLINT1	140.778	129.91	168.779	86.4985	99.2438	97.3437	-1.56277	-0.644102	0.000544248	0.00802072
HBP1	99.5254	129.516	113.868	77.3705	72.9382	66.6787	-1.56302	-0.644334	0.000396978	0.00641195
ZBED6	127.508	83.8507	136.41	84.3251	75.3296	62.7564	-1.5631	-0.644408	0.00126732	0.0144233
PPP4R3B	98.3714	84.2444	93.0595	77.3705	43.6434	54.1987	-1.56557	-0.646685	0.00267436	0.0247049
DMPK	46.4452	54.7195	75.7192	32.3826	43.6434	37.4399	-1.56565	-0.646764	0.00307523	0.0271621
MARK3	121.45	116.525	146.236	77.5878	87.8846	81.2981	-1.566	-0.64708	0.000370727	0.00609157
PCGF5	44.1373	44.4842	53.7549	33.4693	28.3981	28.1691	-1.56618	-0.647248	0.00205914	0.0204575
VWA8	40.0986	46.4525	42.7727	29.3399	24.8109	27.0994	-1.56646	-0.647506	0.0027616	0.0252997
OSBPL8	101.256	100.778	111.267	75.8491	58.8886	63.4695	-1.56678	-0.647801	0.000363477	0.00600958
GABARAPL1	108.757	131.878	110.689	75.8491	59.7854	88.4295	-1.56753	-0.64849	0.000549226	0.0080406
PIK3C2A	87.9862	89.362	112.423	73.2412	53.8069	56.6947	-1.56893	-0.649783	0.00134763	0.0151428
HECA	38.9447	36.6109	43.9287	30.6439	22.1206	22.1074	-1.5697	-0.650489	0.00716934	0.0495333
REV1	33.7521	27.9502	38.1486	21.0813	21.8217	21.7508	-1.56973	-0.65052	0.00439944	0.0348105
NCOA6	105.006	109.439	175.715	83.6731	83.1017	82.0112	-1.56994	-0.65071	0.00130667	0.014745
AAK1	128.95	95.267	90.1694	69.7638	64.2693	66.3221	-1.56996	-0.65073	0.000531847	0.00789996
DSG2	111.065	90.1494	124.561	80.8478	66.0629	59.9038	-1.57051	-0.651234	0.000562474	0.00817307
OGT	226.745	239.349	262.705	179.952	125.25	157.604	-1.57149	-0.652137	0.000804359	0.010372
DGKD	42.118	49.2082	60.402	28.0359	39.1595	29.5953	-1.57296	-0.653486	0.00428373	0.0340368
NUS1	98.3714	100.778	79.7653	65.8518	51.4155	58.4775	-1.5735	-0.653974	0.000874422	0.0110702
NBEAL1	47.3106	49.9955	36.4146	32.1653	26.9034	24.2468	-1.57391	-0.654351	0.00282227	0.0256263
ATP11C	53.0802	47.6335	49.9978	41.5106	22.4195	31.0216	-1.574	-0.654438	0.00519274	0.0391532
RAB3GAP2	95.4867	74.0091	79.7653	56.9412	49.024	52.4159	-1.57413	-0.654552	0.00115417	0.0135057
ASCC3	206.84	183.448	212.129	144.309	119.87	116.955	-1.57439	-0.654798	0.000322041	0.00558134
PTPRK	120.007	144.475	162.999	100.625	83.1017	86.6466	-1.57477	-0.655144	0.000547403	0.00803853
SLC7A5	310.981	285.014	367.036	158.218	273.219	180.425	-1.57531	-0.655639	0.00240585	0.0228272
SELENOS	69.5235	94.8733	66.1821	45.4226	45.7358	54.9118	-1.57562	-0.655921	0.00219522	0.0213624
NRCAM	291.653	221.24	298.831	206.683	127.941	180.425	-1.5757	-0.655996	0.00165575	0.0175518
DIAPH3	49.9069	45.6652	59.2459	40.8586	22.1206	34.9439	-1.57612	-0.656376	0.00585768	0.0427836
TARS1	224.725	225.177	230.337	137.137	157.236	137.636	-1.57797	-0.658065	0.000318166	0.0055286
NOP58	55.388	77.1584	69.0721	49.5519	37.9637	38.5096	-1.57875	-0.658781	0.00153449	0.0166514
TBC1D4	47.0221	51.1765	87.2794	43.6839	39.7573	33.8742	-1.5789	-0.658919	0.00523758	0.0393796
SLC33A1	58.8498	73.6154	44.7957	42.8146	28.0991	40.649	-1.57897	-0.65898	0.00337671	0.0289866
TVP23B	55.0995	55.5068	44.5067	38.9026	24.512	33.8742	-1.57943	-0.6594	0.00341229	0.0291889
GMPPB	50.1954	69.2851	81.2103	42.1626	43.3444	41.3622	-1.57944	-0.65941	0.00179382	0.0184991
SOCS7	47.5991	49.9955	59.824	32.1653	37.6648	29.9519	-1.57988	-0.659815	0.00157684	0.0169566
SF1	179.146	200.769	245.943	113.448	161.421	121.591	-1.58031	-0.660205	0.000799192	0.0103274
SOS1	131.258	111.801	116.18	99.3211	63.9704	62.7564	-1.58057	-0.660443	0.000799435	0.0103274
SPIRE1	73.5622	59.4435	81.2103	46.5092	47.8283	41.7187	-1.58065	-0.660521	0.000985346	0.0121392
FLCN	55.965	57.8688	72.2512	34.9906	46.3337	37.0833	-1.58102	-0.660854	0.00128633	0.0145857
PPP4R3A	98.3714	99.2037	112.134	77.5878	60.0843	56.3381	-1.58164	-0.661422	0.000440043	0.00693208
STK17A	78.7549	70.0724	54.9109	54.1159	38.5616	34.9439	-1.58176	-0.661527	0.0025592	0.0239068
SLC25A36	65.4848	49.2082	43.6397	44.5532	23.9142	31.0216	-1.58184	-0.6616	0.00647687	0.0460166
KCTD9	90.5825	85.819	91.0365	72.1545	34.0777	62.3998	-1.58255	-0.662252	0.00405295	0.0327115
AKIRIN2	57.9843	64.1675	60.402	43.2492	33.4798	36.0136	-1.58416	-0.663714	0.000794221	0.0103001
WDR26	235.688	210.217	239.007	174.736	122.261	134.07	-1.58428	-0.663823	0.000556041	0.00811727
LMAN1	386.562	348	357.21	261.886	213.135	211.803	-1.58454	-0.664061	0.000499184	0.00755769
ARHGEF10	69.235	59.8371	105.776	52.1599	50.8176	45.2844	-1.58566	-0.665085	0.00359049	0.0301506
MTRNR2L12	35.1945	35.0362	42.1947	22.6026	22.1206	27.4559	-1.58636	-0.665722	0.00487454	0.0375201
ADAM17	59.7152	68.1041	41.9057	35.2079	33.1809	38.153	-1.58641	-0.665763	0.00187497	0.0190842
ADAMTS6	56.8304	50.3892	68.4941	39.1199	35.8713	36.0136	-1.58729	-0.666569	0.000741866	0.00981256
KTN1	287.037	260.606	368.481	229.286	148.866	198.61	-1.58784	-0.667061	0.0013501	0.0151578
STAG2	158.664	134.634	149.126	113.665	81.906	81.6546	-1.58814	-0.667338	0.00051172	0.00769141
TNPO1	444.258	440.118	469.921	362.728	220.01	268.854	-1.58815	-0.667351	0.00155956	0.0168683
ATP11B	89.7171	82.6697	86.4124	69.1118	39.4584	53.4856	-1.58857	-0.66773	0.00206324	0.0204687
FBXO11	86.8323	75.1901	89.0134	67.1558	39.4584	50.633	-1.58887	-0.668001	0.0021567	0.0210801
PTPN2	32.8866	32.6742	28.3225	22.1679	19.1313	16.0457	-1.58992	-0.668955	0.00636865	0.0454133
PRPF4B	90.5825	91.724	126.584	79.5438	60.6822	53.129	-1.59068	-0.669641	0.00107477	0.0129176
BIRC2	121.161	94.8733	97.9726	90.6278	43.3444	62.7564	-1.59136	-0.670261	0.00239608	0.022767
SLTM	125.2	118.1	191.61	97.3651	87.8846	88.0729	-1.59199	-0.670836	0.000922932	0.0115523
SAMD4A	124.046	114.95	171.669	90.1931	65.1661	103.049	-1.59223	-0.671052	0.00109729	0.0130702
ATM	197.608	138.177	138.144	119.968	77.1232	100.196	-1.59252	-0.671313	0.00103977	0.0125423
RSL24D1	69.235	70.4661	49.9978	41.9452	43.9423	32.0913	-1.59272	-0.671491	0.00146116	0.0160258
ZNF721	19.9051	18.5023	26.5884	14.344	12.5549	14.2628	-1.59277	-0.671539	0.00696024	0.0485682
REXO1	55.0995	55.1131	88.7244	37.8159	44.8391	42.7885	-1.5936	-0.672291	0.00232883	0.0223195
CLMP	280.979	222.421	245.076	192.557	128.24	147.977	-1.59388	-0.672545	0.000789502	0.0102589
OSMR	183.184	182.267	208.083	130.182	106.119	122.66	-1.59518	-0.673716	0.000160549	0.00327327
OTUD4	68.0811	81.4887	80.0543	53.4639	42.4476	45.9976	-1.59545	-0.673965	0.000765829	0.0100495
WWC2	63.4654	60.6245	85.5454	46.7266	41.5509	43.145	-1.59667	-0.675066	0.00108571	0.0129787
KMT2E	101.545	108.652	132.653	75.8491	65.1661	73.4535	-1.59792	-0.676196	0.000235413	0.00440752
CLIC4	501.377	562.548	520.497	420.756	246.017	323.409	-1.59824	-0.676486	0.00165162	0.017522
CCNG2	64.6194	68.8914	52.8878	47.8132	34.0777	32.8045	-1.60151	-0.679429	0.00129529	0.014637
SDCBP	204.532	179.118	196.523	157.132	97.1513	106.615	-1.60246	-0.68029	0.000470408	0.00727108
WDR43	56.2535	53.1448	62.714	36.7292	31.0884	40.649	-1.60253	-0.680355	0.000645973	0.00895403
PANK3	96.0636	94.086	99.7066	67.3732	59.4865	50.9896	-1.60264	-0.680454	0.000455646	0.00711032
ADAMTSL4	45.8682	31.0996	51.4428	29.9919	19.4303	31.0216	-1.60338	-0.681116	0.00644766	0.045858
RAP2A	49.9069	59.8371	53.1768	49.7692	23.0174	27.8125	-1.60354	-0.681258	0.00610203	0.0441078
OXR1	65.1963	58.6561	56.0669	46.9439	31.6863	32.0913	-1.6038	-0.681492	0.00119465	0.0138573
KCNG1	49.9069	74.4027	80.3433	31.7306	59.1876	36.7268	-1.60436	-0.682001	0.00505507	0.038619
MYO9A	95.7751	79.9141	102.597	66.2865	49.024	57.7644	-1.6053	-0.682845	0.000629632	0.00883355
ZNF655	100.679	81.4887	80.6323	61.5052	44.8391	57.0513	-1.60541	-0.68294	0.00102501	0.0124601
TP53BP2	64.9078	74.7964	96.5275	49.3345	49.323	48.4936	-1.60641	-0.683837	0.00121986	0.0140883
NAV2	178.28	177.149	342.759	154.741	107.913	172.224	-1.60643	-0.683854	0.00484315	0.0373267
BRPF1	36.0599	44.4842	58.6679	24.7759	37.067	24.9599	-1.60645	-0.683873	0.00521181	0.0392111
CAPRIN2	35.1945	40.9412	52.0208	26.9493	24.512	28.5256	-1.60682	-0.684208	0.00317119	0.0276243
AVL9	76.1585	67.7104	73.6962	46.9439	43.9423	44.5713	-1.60709	-0.684455	0.000357552	0.00594344
PLAGL1	47.8876	48.0272	56.3559	33.9039	26.3056	34.5873	-1.60786	-0.685138	0.00147835	0.0161876
DCP1A	43.8489	42.5159	57.8009	32.5999	30.1916	26.3862	-1.60962	-0.686723	0.0013938	0.0154914
KIF5B	312.423	318.082	406.34	264.711	163.812	215.012	-1.60974	-0.68683	0.00103202	0.0124828
MAGT1	106.449	120.462	113.001	77.1531	62.4758	68.4615	-1.61062	-0.687616	0.000138675	0.00295333
ATE1	34.6175	36.6109	32.6575	23.0373	20.327	19.9679	-1.61097	-0.687932	0.00157426	0.0169484
NFKB2	55.6765	50.3892	64.159	32.8173	41.2519	32.4479	-1.61168	-0.688568	0.000640824	0.00893455
FER	59.4267	58.6561	62.425	48.2479	29.5938	32.8045	-1.61209	-0.688929	0.00117137	0.0136427
SLK	117.988	119.674	156.351	84.3251	66.0629	94.4912	-1.61269	-0.689466	0.000357688	0.00594344
MCUR1	37.5023	40.1539	39.3046	23.4719	26.3056	22.4639	-1.61294	-0.689696	0.0029023	0.026103
TAB2	163.568	150.774	167.334	115.404	77.1232	105.545	-1.6135	-0.690192	0.000283312	0.00504835
TCEA1	137.028	137.783	122.538	93.6704	86.091	64.1827	-1.61471	-0.691277	0.000212933	0.004061
HMGB2	66.6387	80.3077	99.9956	58.6799	31.0884	63.113	-1.61521	-0.691721	0.00480192	0.0371116
RARA	27.1171	31.4932	46.2407	20.4293	22.7185	22.1074	-1.61521	-0.691724	0.00397722	0.0322177
CHM	48.176	32.2806	41.6167	30.2093	21.5228	23.5336	-1.61571	-0.692169	0.0034247	0.0292369
RANBP9	86.2553	83.0634	94.7935	55.8545	59.7854	47.0673	-1.61588	-0.692324	0.000539357	0.0079663
PDS5A	173.953	178.33	206.927	129.748	107.016	107.684	-1.61635	-0.692735	0.000121335	0.00267481
DOT1L	81.6396	85.0317	143.346	52.5945	74.4328	65.2524	-1.61697	-0.69329	0.00177699	0.0183893
ZBTB43	30.8673	23.6199	34.9696	22.1679	17.3378	15.3325	-1.61712	-0.693424	0.00658498	0.0465607
OSTM1	29.7134	27.5566	27.4554	18.6906	15.5442	17.8285	-1.61817	-0.694365	0.00238831	0.0227419
EIF4A2	301.172	328.317	314.726	227.113	156.04	198.966	-1.61837	-0.694542	0.00046732	0.00724019
BRD4	107.891	109.833	184.096	78.2398	86.6889	83.794	-1.61844	-0.694606	0.000741783	0.00981256
ATAD3A	74.1392	102.747	115.024	41.9452	81.906	56.6947	-1.6194	-0.69546	0.00358903	0.0301506
ADIPOR2	109.622	126.367	171.091	79.9785	92.6674	78.8021	-1.62015	-0.696128	0.000360557	0.00597057
FBXO30	74.4277	79.1267	73.6962	48.0305	45.138	45.9976	-1.62036	-0.696311	0.000330257	0.00567197
VAV2	47.3106	41.7285	68.7831	31.9479	39.1595	26.3862	-1.62041	-0.696361	0.003223	0.0279292
CREBBP	153.759	180.299	313.281	124.966	139.898	134.784	-1.62091	-0.696805	0.00173821	0.0181082
DLG1	60.0037	66.1358	60.98	44.9879	29.2949	39.9359	-1.62123	-0.697089	0.000759336	0.0100137
HSPA9	420.314	415.317	475.991	241.022	293.546	276.699	-1.62167	-0.697477	0.000359732	0.00596993
URI1	61.7346	56.6878	56.6449	37.5986	26.6045	44.2147	-1.62196	-0.697738	0.000887087	0.0111879
CEP120	47.0221	32.2806	44.5067	24.7759	24.8109	28.1691	-1.62262	-0.698327	0.00266275	0.024649
ARID4A	27.4055	25.5882	31.7905	22.8199	15.8431	12.48	-1.62287	-0.69855	0.0056948	0.0419164
TRIP11	114.238	83.4571	78.3202	65.6345	51.1165	52.7724	-1.62312	-0.698768	0.000773155	0.0101257
PHF10	43.2719	50.7828	50.8648	38.0332	25.4088	24.2468	-1.62323	-0.698865	0.00181369	0.0186451
RSF1	100.102	68.4978	112.423	56.2892	62.1768	55.2684	-1.62428	-0.699802	0.000743454	0.0098181
STK39	40.0986	46.0588	41.6167	29.9919	19.4303	28.1691	-1.62524	-0.700656	0.00308482	0.0271927
LATS1	52.5032	54.3258	69.0721	39.7719	34.9745	32.8045	-1.62549	-0.700879	0.000519324	0.00776532
JAG1	23.0783	31.8869	32.3685	18.0386	20.626	14.2628	-1.62567	-0.701032	0.0057666	0.0423043
LRRC58	54.2341	45.2715	52.5988	44.3359	25.4088	22.8205	-1.62631	-0.701599	0.00463248	0.0361171
SMCR8	78.7549	80.3077	120.804	53.2465	67.5575	51.3461	-1.62834	-0.703402	0.00101895	0.0124152
RBM33	99.5254	81.4887	108.666	57.5932	57.6929	64.5392	-1.62849	-0.703539	0.000343306	0.00579868
CCNT2	37.5023	40.5475	46.2407	27.8186	23.3163	24.2468	-1.62971	-0.704612	0.00177082	0.0183759
CUL3	126.354	113.376	122.827	88.8891	64.5683	67.3918	-1.62998	-0.704855	0.000119897	0.00265631
LTN1	74.7161	55.5068	54.3329	51.0732	27.5013	33.8742	-1.63141	-0.706115	0.00255043	0.0238753
AGO2	73.8507	74.0091	104.331	45.8572	53.8069	55.9816	-1.63177	-0.706435	0.000726277	0.00969318
CHKA	25.3862	30.3122	37.5706	17.1693	22.4195	17.8285	-1.63187	-0.706524	0.00612348	0.0442148
FAM3C	63.4654	57.8688	72.2512	44.5532	35.8713	37.4399	-1.63268	-0.707245	0.000481412	0.0073811
AGO3	32.3097	32.2806	34.6806	20.212	22.4195	17.8285	-1.63472	-0.709042	0.00195689	0.0197217
CEP57	50.1954	46.4525	40.4606	33.2519	20.9249	28.8822	-1.63493	-0.709227	0.0018133	0.0186451
NFE2L2	197.031	200.769	248.544	151.046	105.521	138.349	-1.63526	-0.709518	0.000259992	0.00472498
MAP2K1	89.1401	112.982	121.96	60.2012	76.2264	61.6867	-1.63595	-0.710127	0.000162726	0.00330753
CLIP1	126.931	124.005	192.477	95.4091	83.6996	91.9952	-1.63702	-0.711072	0.000356849	0.00594344
IFNGR1	48.4645	40.9412	37.8596	35.4252	17.6367	23.8902	-1.6376	-0.711585	0.00620952	0.0446689
SMC3	87.9862	89.7557	122.827	77.8051	51.1165	53.8421	-1.63769	-0.711663	0.000886224	0.0111876
OSBP	169.914	165.339	194.789	99.1038	118.674	107.684	-1.63826	-0.712161	8.43375e-05	0.00206464
WASF1	28.5595	31.4932	42.1947	19.9946	23.0174	19.6114	-1.63884	-0.712678	0.00276869	0.0253473
MAP2	36.3484	29.1312	39.5936	26.2973	17.9356	19.2548	-1.63907	-0.712879	0.00200455	0.0200802
ATXN2L	260.785	256.67	386.688	146.265	222.402	183.634	-1.63924	-0.71303	0.000798299	0.0103274
CDCA5	27.9825	44.0905	39.8826	23.4719	20.626	23.5336	-1.63967	-0.71341	0.00399752	0.0323258
TTC17	160.394	144.475	184.096	97.7998	100.141	101.979	-1.63987	-0.713585	7.99171e-05	0.00198197
FANCA	35.483	35.0362	44.5067	24.5586	21.5228	24.2468	-1.64119	-0.714741	0.00247253	0.0233465
LCOR	42.118	33.0679	45.3737	25.8626	27.2024	20.3245	-1.64213	-0.715572	0.0032118	0.0278836
ANKRD13C	37.5023	39.7602	49.1308	26.0799	25.7077	25.3165	-1.64217	-0.715601	0.00156643	0.0169152
SETX	139.047	137.783	141.323	106.276	56.7962	90.9255	-1.64275	-0.716115	0.000448071	0.00704044
PLEKHA3	29.7134	24.0136	27.1664	20.4293	15.8431	11.7668	-1.64364	-0.716896	0.00557246	0.0412443
FBXO34	26.5401	35.0362	41.3277	19.56	21.8217	21.3942	-1.64387	-0.717094	0.00282198	0.0256263
ARFGEF1	126.642	107.077	140.456	95.4091	54.4047	77.3758	-1.64412	-0.717312	0.000375219	0.00613505
TADA2B	31.4442	34.2489	35.5476	18.908	22.4195	20.6811	-1.64439	-0.717549	0.00145218	0.0159668
AHCTF1	109.911	92.1177	137.855	78.2398	58.5897	69.8878	-1.64446	-0.717618	0.000236504	0.00442174
CD2AP	32.3097	33.0679	36.4146	19.7773	20.626	22.1074	-1.64463	-0.717766	0.00137154	0.015321
KMT5A	49.9069	58.2625	75.4302	41.0759	33.4798	36.7268	-1.64473	-0.71785	0.000645119	0.00895153
FOXJ3	63.4654	72.8281	73.9852	48.0305	45.4369	32.4479	-1.64494	-0.718032	0.000463914	0.00721265
SKIL	60.2922	59.8371	68.7831	57.1585	22.4195	34.5873	-1.64554	-0.718563	0.0051598	0.0389962
MAN2A1	97.7945	75.5837	74.8522	61.2878	45.7358	42.7885	-1.64579	-0.71878	0.000682497	0.00929954
NBPF19	47.5991	35.0362	59.5349	28.6879	30.7895	27.4559	-1.64591	-0.718889	0.00163286	0.0174062
KLHL5	153.471	148.018	156.93	111.709	72.6393	93.0649	-1.64637	-0.719289	0.000174845	0.00349505
FAM83G	46.1567	51.9638	54.9109	29.7746	31.9852	31.3782	-1.64736	-0.720155	0.000556295	0.00811727
NUCB2	98.6599	102.747	97.6836	84.7598	36.4691	59.5473	-1.64822	-0.720907	0.00240516	0.0228272
RERE	125.489	142.507	236.984	99.9731	104.923	101.623	-1.6487	-0.721329	0.00067644	0.00924143
CRELD2	39.5217	79.5204	46.2407	29.3399	37.6648	32.8045	-1.64914	-0.721712	0.00324838	0.0280942
YIPF6	45.5797	50.7828	43.6397	31.0786	23.9142	28.1691	-1.65017	-0.722615	0.00073903	0.00980432
GK5	32.0212	27.1629	31.5015	23.2546	17.6367	12.8365	-1.65044	-0.722853	0.00512779	0.0389507
FNDC3A	143.951	147.231	158.664	100.625	84.2974	84.8638	-1.6517	-0.723951	7.64814e-05	0.00192187
CHST2	76.1585	111.407	135.543	58.2452	79.2157	58.121	-1.65176	-0.724005	0.00057896	0.00832913
STC2	569.17	486.177	603.442	344.69	321.347	338.742	-1.65294	-0.725038	0.000247319	0.00457063
ATRX	160.683	124.398	139.589	112.144	57.0951	87.0032	-1.65442	-0.726323	0.000680139	0.00928244
BRWD1	76.1585	52.7512	65.026	40.8586	36.1702	40.649	-1.65811	-0.729538	0.000430236	0.00681519
EDNRA	26.8286	38.9729	27.1664	18.4733	20.0281	16.4022	-1.65841	-0.729803	0.00499966	0.0383057
NSD3	140.778	159.828	170.802	104.32	86.091	91.9952	-1.65953	-0.730772	7.11426e-05	0.00182609
EIF5B	174.818	154.71	233.227	124.097	97.7492	117.312	-1.66028	-0.731425	0.000141693	0.0029906
KLF16	40.0986	48.4208	61.269	24.5586	35.5723	30.6651	-1.66056	-0.731669	0.00139966	0.0155152
FUBP3	96.929	86.2127	128.318	59.7665	67.5575	60.9735	-1.66067	-0.731769	0.00017933	0.00355484
HSPD1	467.336	448.778	507.203	302.31	264.55	289.892	-1.66081	-0.731885	0.000203556	0.00394142
DDAH1	34.906	41.7285	60.691	34.9906	21.2238	26.0296	-1.66093	-0.731993	0.00324701	0.0280942
UPF2	71.5429	57.0815	71.9621	42.3799	42.4476	36.0136	-1.6617	-0.732657	0.00024315	0.00452687
ZNF148	56.5419	52.7512	58.3789	42.1626	28.3981	28.8822	-1.66177	-0.732724	0.000507425	0.00764606
EPAS1	116.546	112.195	140.167	76.7185	65.764	80.2283	-1.66203	-0.732947	5.25694e-05	0.00140322
BAZ1A	74.1392	74.7964	99.7066	52.3772	52.0133	44.9279	-1.66246	-0.733322	0.000339971	0.00577169
FMNL2	84.8129	79.9141	99.7066	62.1572	47.2305	48.4936	-1.66395	-0.734611	0.000325146	0.0056132
PABPC1L	21.059	21.2579	31.5015	12.388	17.9356	14.6194	-1.66504	-0.735557	0.00714018	0.0493832
NR3C1	132.124	152.348	178.027	103.233	78.3189	95.5609	-1.66574	-0.736163	0.000115311	0.00259362
USO1	271.459	241.711	204.037	192.122	107.315	130.148	-1.66579	-0.736205	0.000570415	0.00825085
TOGARAM1	32.3097	29.9186	36.9926	21.2986	17.0388	21.3942	-1.66733	-0.737539	0.00137868	0.0153804
SRSF11	158.664	166.52	225.424	115.404	106.717	108.041	-1.66778	-0.737927	8.87461e-05	0.00213714
MANF	105.295	190.534	123.116	80.8478	85.4932	84.1506	-1.66818	-0.738275	0.00032636	0.00562465
SYNE3	37.7908	29.5249	48.8418	25.2106	21.8217	22.8205	-1.66905	-0.73903	0.00282443	0.0256281
PCM1	180.011	151.561	192.766	121.054	81.0092	111.963	-1.6693	-0.739244	0.000137669	0.00294218
NEK1	52.2148	41.7285	47.9748	34.1212	22.4195	27.8125	-1.67012	-0.739951	0.00111643	0.0132506
TUT4	71.8313	67.3168	68.2051	48.6825	33.1809	41.0056	-1.67034	-0.740138	0.00024835	0.0045736
CEP170	165.01	162.19	221.956	119.098	95.6567	114.103	-1.6704	-0.740195	9.85346e-05	0.00231009
CEP95	22.5014	24.8009	29.1895	18.6906	13.7506	12.1234	-1.67097	-0.740688	0.00514421	0.0389962
CENPJ	59.7152	59.0498	88.4354	47.1612	32.882	43.8582	-1.67201	-0.741585	0.00072773	0.00970282
MKLN1	100.968	90.1494	104.331	77.1531	46.0348	52.4159	-1.67257	-0.742064	0.000488531	0.00745324
LPP	162.991	166.127	217.62	127.574	99.8417	98.4134	-1.67353	-0.742891	0.000104339	0.00242902
QSER1	54.8111	68.1041	58.6679	45.6399	27.2024	34.2308	-1.67516	-0.744301	0.000531894	0.00789996
ADNP2	35.7714	38.5792	43.3507	24.3413	22.1206	23.5336	-1.6758	-0.74485	0.00114901	0.0134601
ZNF292	59.1383	48.8145	47.6858	44.7706	24.2131	22.8205	-1.67803	-0.746766	0.00348986	0.029567
MED13L	135.008	155.104	221.956	108.666	94.461	101.979	-1.67812	-0.746843	0.000166062	0.00334463
ZZZ3	81.9281	78.3394	89.8804	55.4199	43.9423	48.4936	-1.67875	-0.74739	0.000159813	0.00326328
TRIM33	53.9456	53.9322	62.714	36.2946	33.7788	30.6651	-1.67927	-0.747833	0.000165419	0.00333675
TMEM41B	30.8673	28.7376	28.3225	22.6026	18.2346	10.3405	-1.67958	-0.748098	0.00544312	0.0406491
WASL	62.0231	54.7195	58.9569	40.6412	27.8002	35.3005	-1.68011	-0.74856	0.000244166	0.00453943
CAPN7	62.0231	65.3484	62.714	50.4212	29.8927	31.3782	-1.68061	-0.748988	0.000594909	0.00849423
SYVN1	92.3134	119.281	130.919	62.5918	74.1339	67.0352	-1.68224	-0.750382	7.27996e-05	0.00185034
GTF2H1	68.3696	60.6245	65.315	43.0319	29.8927	42.4319	-1.68241	-0.750525	0.000231234	0.00434151
SCAF4	50.4839	51.5702	98.8396	39.9892	42.7466	36.7268	-1.68345	-0.751424	0.0020559	0.0204406
EPB41L3	122.604	110.62	190.454	72.1545	95.6567	84.5072	-1.68351	-0.751473	0.000291823	0.00516538
LRIF1	25.3862	33.0679	30.0565	21.2986	14.9464	14.6194	-1.6843	-0.752148	0.00242283	0.022972
ATXN2	81.6396	89.7557	112.712	57.5932	52.9101	58.121	-1.68679	-0.75428	0.000140681	0.00297782
PNP	29.1364	39.3665	42.7727	16.7346	26.9034	22.8205	-1.68681	-0.754301	0.00316065	0.0275721
RIPK2	38.9447	34.6426	33.5245	22.6026	17.0388	23.8902	-1.6874	-0.754801	0.000912525	0.0114436
PPIL4	47.0221	34.6426	57.2229	30.2093	24.2131	28.1691	-1.6879	-0.755231	0.00109061	0.0130256
SERTAD2	24.2323	25.9819	40.7496	22.3853	14.0496	17.1154	-1.68841	-0.755662	0.00640226	0.0455839
LRPPRC	183.473	158.647	171.669	121.054	92.6674	88.786	-1.68925	-0.756386	5.12134e-05	0.0013781
AFDN	111.353	102.353	148.837	65.1998	86.6889	63.113	-1.68936	-0.756481	0.000107638	0.00247978
MACO1	51.0608	55.5068	63.292	31.9479	32.2841	37.4399	-1.69045	-0.757407	0.000157478	0.00324049
NUFIP2	159.241	148.805	188.142	125.184	76.5253	90.9255	-1.69073	-0.757644	0.000145523	0.00303251
TLK2	64.3309	83.8507	87.2794	50.8559	38.8605	48.8501	-1.69121	-0.75806	0.000258096	0.00469983
DNAJA1	299.153	376.738	436.108	237.979	191.612	227.135	-1.69216	-0.758866	0.00013277	0.00285606
RALGAPA1	51.6378	46.4525	60.98	34.3386	27.2024	32.4479	-1.69421	-0.760615	0.00041157	0.00655995
TASOR2	120.007	107.471	150.86	83.2385	66.0629	73.8101	-1.69494	-0.761237	4.55323e-05	0.00126624
SETD1A	59.1383	62.9865	124.272	34.5559	63.6715	47.4239	-1.69583	-0.761994	0.00561534	0.0414924
CAMSAP2	132.7	132.665	155.484	93.6704	76.5253	76.3061	-1.69701	-0.762996	3.30709e-05	0.00100829
ZSWIM6	66.3502	64.5611	89.8804	46.5092	37.3659	46.3542	-1.6986	-0.764347	0.000265132	0.00478209
TCP11L2	17.8857	19.6833	21.3863	9.56264	13.7506	12.1234	-1.69932	-0.764958	0.00509146	0.0388078
RAB5A	99.2369	106.29	89.8804	70.6332	50.8176	50.2764	-1.69972	-0.765298	0.000157267	0.00324049
ME2	53.0802	62.1991	52.3098	31.0786	30.7895	36.7268	-1.7015	-0.76681	0.000124928	0.00273587
MIS12	28.271	43.6969	30.0565	21.2986	16.441	21.3942	-1.70178	-0.767047	0.00181019	0.0186389
DNER	27.694	26.7692	36.1256	14.7786	21.8217	17.472	-1.70186	-0.767113	0.00285205	0.0257593
USP16	69.5235	68.4978	59.824	49.5519	27.8002	37.7965	-1.70337	-0.768395	0.000521084	0.00777991
ZNF331	47.8876	52.3575	84.3893	42.1626	26.6045	39.5793	-1.70356	-0.768557	0.00135935	0.0152367
PCNX1	124.335	129.91	178.894	103.016	65.1661	85.5769	-1.70419	-0.769088	0.000166518	0.00334876
ZNF143	22.5014	24.0136	35.8366	17.604	20.327	9.98397	-1.70534	-0.770062	0.00679837	0.0477899
RALA	97.7945	91.724	101.441	57.3759	68.1554	44.2147	-1.70707	-0.77152	0.000113295	0.00256234
VEPH1	46.4452	33.8552	44.2177	24.9933	22.7185	26.3862	-1.70798	-0.772288	0.000697519	0.0094517
GCLM	131.547	118.493	108.666	73.4585	61.579	74.8798	-1.70801	-0.772315	1.79664e-05	0.000608023
RPS6KB1	62.6	57.4751	70.8061	50.4212	30.4906	29.5953	-1.71112	-0.77494	0.000547967	0.00803853
USP15	82.2166	66.5294	65.026	51.0732	35.2734	37.4399	-1.71247	-0.776078	0.000247563	0.00457063
KNTC1	63.4654	55.5068	65.315	44.9879	27.8002	33.8742	-1.71344	-0.776892	0.000245104	0.00454417
CASP8AP2	26.5401	24.4073	25.7214	17.8213	11.9571	13.9062	-1.71445	-0.77775	0.00247287	0.0233465
HDAC4	38.6562	41.3349	49.7088	23.4719	25.1099	28.1691	-1.71584	-0.778914	0.000701497	0.00948627
QKI	97.7945	108.258	137.277	75.8491	60.0843	63.4695	-1.7159	-0.778962	4.04718e-05	0.0011471
ANKRD27	38.6562	38.9729	46.8187	23.9066	23.6152	25.6731	-1.71592	-0.778979	0.000392738	0.00635117
CUL4B	200.205	190.534	183.229	160.609	71.7425	101.266	-1.71631	-0.779314	0.000422534	0.0067186
CEP135	18.7512	18.5023	26.5884	14.344	10.7614	11.7668	-1.71771	-0.780491	0.00343246	0.0292485
SREBF1	62.3115	44.8778	66.7601	31.7306	39.7573	30.3085	-1.71953	-0.782017	0.000239195	0.00446576
TENT5A	43.8489	44.0905	38.4376	20.4293	34.0777	18.8982	-1.72008	-0.782474	0.00181782	0.0186597
INO80	67.5042	68.4978	104.042	50.2039	46.0348	43.145	-1.7209	-0.783162	0.000400017	0.00643493
RHOQ	79.0433	77.5521	61.847	53.8985	32.2841	39.5793	-1.72162	-0.783765	0.000339024	0.00576297
DCP2	24.2323	29.9186	23.6984	19.3426	10.4624	14.2628	-1.72182	-0.783937	0.0041287	0.0331418
gene:ENSG00000285976	36.3484	48.8145	50.5758	27.8186	24.512	25.6731	-1.7225	-0.784501	0.000467014	0.00724019
MEF2D	107.603	134.634	169.068	79.3265	92.3685	66.6787	-1.72302	-0.784942	8.00692e-05	0.00198205
TMF1	132.412	109.439	122.249	79.7611	61.579	69.1747	-1.72383	-0.785614	1.56539e-05	0.000553424
GOLGA6L9	17.8857	17.3213	19.0743	9.77998	8.96781	13.5497	-1.72425	-0.785972	0.00377088	0.0311344
DNAJC1	47.8876	53.9322	50.5758	30.4266	27.2024	29.9519	-1.72444	-0.786127	0.000129173	0.00281032
DIPK2A	58.5613	45.6652	44.5067	34.7732	23.9142	26.7428	-1.72521	-0.786769	0.000440132	0.00693208
NCOA1	25.9631	32.2806	36.1256	17.3866	23.0174	13.9062	-1.72566	-0.787146	0.00320289	0.027844
UBC	2304.37	2338.37	2943.8	1325.73	1610.92	1460.87	-1.72566	-0.787152	0.000118847	0.00264509
NFKB1	62.0231	71.2534	87.2794	42.1626	40.3552	45.641	-1.72643	-0.787794	0.000121763	0.0026798
CEP290	66.0618	51.5702	48.8418	45.2052	21.2238	29.2388	-1.72826	-0.789321	0.00138265	0.0153804
CHORDC1	66.0618	45.6652	58.9569	35.4252	29.8927	33.8742	-1.72911	-0.790029	0.000143003	0.00299561
YES1	71.5429	57.0815	64.159	45.2052	31.0884	34.2308	-1.72989	-0.790681	0.00014361	0.00300158
CTDSPL2	32.0212	38.5792	37.8596	32.3826	10.4624	19.2548	-1.73008	-0.790842	0.00710568	0.0492552
PPP3R1	77.024	86.2127	85.8344	56.0719	38.8605	47.4239	-1.73084	-0.791468	0.000105249	0.00244167
CDK13	97.506	94.8733	119.359	62.1572	57.6929	60.617	-1.73103	-0.791633	2.60631e-05	0.000826866
KDSR	85.9668	70.8598	60.691	43.4666	48.7251	32.8045	-1.73168	-0.79217	0.000198392	0.00386124
STAG1	105.006	114.95	105.487	71.2852	50.2198	64.8958	-1.73287	-0.793159	2.06309e-05	0.000680512
SOCS3	24.8092	25.1946	22.2534	9.56264	18.5335	14.2628	-1.73324	-0.793469	0.00342161	0.029231
gene:ENSG00000284906	24.2323	27.5566	28.0334	20.4293	8.66889	16.4022	-1.73361	-0.793776	0.00601088	0.0435674
KMT2A	188.665	165.733	264.439	115.404	129.137	112.676	-1.73466	-0.794652	4.82071e-05	0.00131315
JUNB	59.7152	87.7874	72.8292	41.5106	39.7573	44.9279	-1.73778	-0.797248	0.000106328	0.0024624
PLAU	90.294	129.91	89.0134	52.8119	68.1554	56.3381	-1.73921	-0.798428	0.000110052	0.00252227
GMCL1	20.1936	23.2263	19.3633	13.9093	9.86459	11.0537	-1.73962	-0.798769	0.00290753	0.0261323
CCDC186	27.4055	32.2806	33.2355	20.8639	12.8539	18.8982	-1.73971	-0.798844	0.0016485	0.0175029
TENT4B	29.7134	26.3756	35.2586	17.3866	21.5228	13.5497	-1.73975	-0.798878	0.00183906	0.0188196
IPO7	332.905	293.281	311.547	225.591	137.208	175.076	-1.74044	-0.799456	9.03148e-05	0.00215153
MIA3	162.414	155.891	175.137	101.277	96.5535	83.4375	-1.74134	-0.800197	1.00659e-05	0.00039221
DNAJC10	255.016	249.584	207.794	178.865	102.532	126.583	-1.74138	-0.80023	0.000107064	0.00247214
N4BP2	19.9051	33.4616	18.7853	17.604	11.0603	11.7668	-1.74256	-0.801207	0.00548019	0.0407885
TAF5	14.1355	14.172	15.8953	8.47598	8.66889	8.20112	-1.74363	-0.802091	0.00540321	0.0404192
MTDH	248.958	220.453	249.411	154.306	122.56	133.714	-1.74592	-0.803985	1.66091e-05	0.000573467
RIOK3	57.6959	62.5928	63.292	39.9892	33.1809	29.2388	-1.74624	-0.804248	4.7721e-05	0.00130258
SLC30A1	34.0406	32.6742	28.9005	22.8199	17.0388	13.1931	-1.74866	-0.80625	0.00206334	0.0204687
SPAG9	177.126	175.181	205.193	119.75	97.7492	99.8397	-1.74883	-0.806387	1.14481e-05	0.000428675
RNF19B	20.1936	25.5882	30.0565	12.1706	18.8324	12.48	-1.74915	-0.806658	0.00334607	0.0287892
GNL3	126.065	122.43	156.93	71.2852	88.7814	72.3838	-1.74955	-0.806987	1.64627e-05	0.000572875
ZNF841	35.1945	31.0996	31.7905	21.2986	13.1528	21.3942	-1.75021	-0.807525	0.00163941	0.0174481
NIPBL	126.354	114.163	141.323	97.1478	46.3337	74.1666	-1.75054	-0.807797	0.000185223	0.00364766
SLC4A7	49.6184	44.0905	54.9109	29.5573	27.8002	27.8125	-1.75116	-0.80831	8.82421e-05	0.00212886
MAP4K5	96.6406	98.81	106.643	74.1105	42.4476	54.9118	-1.75135	-0.808469	0.000139979	0.00296769
GLCCI1	35.1945	23.6199	36.9926	23.6893	12.256	18.5417	-1.75197	-0.808976	0.00395486	0.0321148
RAPH1	44.7143	40.1539	47.6858	30.4266	20.327	23.8902	-1.75311	-0.809914	0.000451989	0.0070691
ZNF37A	50.7724	51.1765	51.1538	35.4252	21.8217	28.8822	-1.75326	-0.810041	0.000230964	0.00434151
ADGRE5	37.5023	25.5882	31.5015	16.952	20.9249	16.7588	-1.75517	-0.811607	0.00151516	0.0164955
PPM1D	43.5604	39.3665	45.6627	21.0813	31.0884	21.7508	-1.7578	-0.813775	0.000533093	0.00790893
GPT2	43.5604	48.0272	49.9978	22.6026	31.3873	27.8125	-1.75851	-0.814354	0.000175465	0.00350219
RICTOR	72.9853	78.7331	84.9674	46.7266	46.9316	39.2227	-1.7621	-0.817293	3.74893e-05	0.00109606
FAM53B	25.3862	23.6199	32.3685	15.2133	18.2346	12.8365	-1.76228	-0.817446	0.00138205	0.0153804
ORC6	20.482	22.8326	35.8366	17.3866	11.3592	16.0457	-1.7639	-0.81877	0.0041207	0.0331079
ANKRD10	59.4267	79.1267	77.1642	41.2932	39.1595	41.0056	-1.76499	-0.819663	4.16935e-05	0.00117671
KMT2B	79.9088	94.8733	149.704	54.3332	68.1554	61.6867	-1.76521	-0.819837	0.000143099	0.00299561
RRAGC	77.3125	79.5204	78.6093	55.4199	36.768	39.2227	-1.76789	-0.822029	8.45432e-05	0.00206587
ANKHD1-EIF4EBP3	90.5825	42.9095	122.538	50.2039	53.209	41.3622	-1.77026	-0.823963	0.00268531	0.0247716
ZNF639	36.6369	37.0045	26.2994	27.8186	13.4517	14.2628	-1.77041	-0.824087	0.00374487	0.0310159
CCDC93	87.1208	84.638	106.643	54.7679	53.209	48.8501	-1.77302	-0.826205	2.2021e-05	0.000715709
LRRFIP2	91.7364	100.778	127.74	61.5052	60.0843	58.8341	-1.77491	-0.827745	1.41408e-05	0.000509414
IBTK	128.373	109.833	96.2385	84.5425	45.138	57.7644	-1.77622	-0.828811	9.08054e-05	0.00215935
AHR	104.718	104.321	130.341	74.3278	52.9101	63.113	-1.77663	-0.829145	1.11684e-05	0.000419384
ATP2A2	418.583	500.349	630.03	289.27	308.493	273.846	-1.77689	-0.829351	6.41015e-05	0.00166426
DIS3	94.9097	76.7647	84.6784	58.0279	36.1702	49.5633	-1.77714	-0.829557	8.96677e-05	0.0021428
SFPQ	259.631	366.109	454.604	191.905	211.341	204.671	-1.77739	-0.829758	7.51665e-05	0.0018996
DST	1103.14	965.661	1562.07	699.812	650.465	692.816	-1.77753	-0.829873	8.90672e-05	0.002141
SAT1	84.5244	129.122	108.955	56.0719	77.4221	47.4239	-1.7776	-0.829933	7.59703e-05	0.00191627
ZCCHC7	33.4636	35.0362	34.9696	19.1253	17.9356	21.3942	-1.77794	-0.830207	0.000189965	0.0037245
CERS6	75.2931	74.0091	77.7422	62.5918	21.8217	42.7885	-1.77808	-0.830317	0.00166482	0.0176058
PPFIA1	101.256	95.267	139.878	67.3732	56.1983	65.609	-1.78046	-0.83225	1.50216e-05	0.000536779
TMEFF2	13.5585	22.4389	29.7675	13.9093	8.96781	13.9062	-1.78165	-0.833215	0.00584532	0.0427168
CNNM4	18.1742	18.8959	28.9005	10.2146	17.3378	9.6274	-1.78175	-0.833294	0.00414017	0.0331938
SIX4	37.5023	40.1539	49.4198	28.9053	20.0281	21.3942	-1.78254	-0.833936	0.000372557	0.00611408
NFKBIA	97.7945	90.543	78.0312	43.4666	55.8994	50.9896	-1.78289	-0.834217	3.43208e-05	0.00102986
ATG16L2	17.5972	16.5339	36.9926	13.2573	14.9464	11.7668	-1.78389	-0.835024	0.00614338	0.0443344
EP300	204.82	231.869	391.89	140.397	168.595	155.821	-1.78391	-0.83504	0.000159012	0.00325297
FAM133B	23.9438	25.5882	26.2994	18.256	10.4624	12.48	-1.7848	-0.83576	0.00200985	0.0201031
IER5	76.7355	107.077	145.658	49.7692	82.5039	52.4159	-1.78483	-0.835786	0.000298453	0.00523674
SLC12A2	31.7327	28.3439	23.1204	15.2133	12.5549	19.2548	-1.78542	-0.83626	0.00100645	0.0123307
LMTK2	29.4249	33.8552	56.9339	20.6466	27.5013	19.2548	-1.78604	-0.836762	0.00234777	0.0224525
TMEM87A	83.3705	88.5747	79.1873	52.5945	44.2412	40.2925	-1.78649	-0.837128	3.08447e-05	0.000951479
PDE8A	64.9078	69.2851	84.1003	46.5092	35.8713	38.8662	-1.78759	-0.838017	4.35009e-05	0.00121738
MIS18BP1	62.8885	56.6878	52.8878	47.3786	19.1313	29.2388	-1.78839	-0.838658	0.00103108	0.0124828
TRPM7	92.8903	88.9684	82.9443	65.4172	35.2734	46.3542	-1.78855	-0.838791	0.00017944	0.00355484
ZC3H7A	104.141	93.6924	110.978	70.6332	45.4369	55.625	-1.78933	-0.839422	3.83388e-05	0.00111518
EIF3A	566.862	540.109	827.709	381.854	317.461	381.887	-1.78988	-0.839862	8.28347e-05	0.00203159
NFIL3	126.931	109.833	101.441	67.8078	61.8779	58.121	-1.78992	-0.839895	3.35538e-06	0.000155955
SMOX	26.5401	35.0362	31.5015	12.1706	22.4195	17.8285	-1.79132	-0.841024	0.00155562	0.0168532
PHIP	113.661	94.4797	117.336	76.5011	49.9208	54.1987	-1.79261	-0.842063	1.79758e-05	0.000608023
GCLC	391.755	263.756	220.8	141.484	212.836	134.07	-1.79456	-0.843628	0.000233371	0.00437547
RASAL2	66.6387	65.3484	83.2333	40.2066	41.2519	38.8662	-1.79483	-0.843848	2.30313e-05	0.000741295
POLG2	12.1161	22.8326	26.2994	12.6053	10.7614	10.3405	-1.79664	-0.845298	0.00594789	0.0433234
CDT1	24.2323	29.1312	39.8826	13.692	21.5228	17.1154	-1.79697	-0.845565	0.00169375	0.0177853
KIAA2026	41.541	40.1539	41.6167	28.0359	16.441	23.1771	-1.79776	-0.846199	0.000724942	0.00969318
XPOT	393.486	407.05	408.364	245.803	213.434	208.237	-1.79863	-0.846895	8.51024e-06	0.000344833
MANBA	72.4083	79.1267	91.9035	43.9012	42.4476	49.9199	-1.79867	-0.846927	3.86252e-05	0.00111862
ITPR3	132.989	123.611	241.897	64.5478	129.734	83.0809	-1.79939	-0.847511	0.00108192	0.012945
NEDD4	172.511	145.656	194.211	116.056	72.3404	95.9174	-1.79955	-0.847636	1.90256e-05	0.000637047
RDH10	25.3862	19.6833	20.2303	11.5186	14.9464	9.98397	-1.79963	-0.847699	0.00120193	0.0139175
LRIG2	16.1548	16.1403	16.4733	9.34531	10.1635	7.13141	-1.80034	-0.848266	0.00220435	0.0214199
AGTPBP1	16.4433	19.2896	18.4963	11.9533	7.7721	9.27083	-1.80384	-0.851071	0.00178049	0.0183901
ERF	64.9078	88.5747	108.666	45.2052	60.9811	38.8662	-1.80471	-0.85177	0.00019799	0.00385906
HIPK3	53.0802	48.0272	66.7601	36.7292	24.512	31.3782	-1.80635	-0.853078	0.000107878	0.00248102
FMN1	37.7908	38.5792	48.8418	23.9066	25.7077	19.2548	-1.80778	-0.854217	0.000411313	0.00655995
TMED5	127.508	118.493	98.2616	82.8038	51.1165	55.2684	-1.80799	-0.85439	2.13896e-05	0.000698605
UHRF1BP1L	61.1576	48.0272	42.4837	40.2066	22.1206	20.6811	-1.80834	-0.854668	0.000814295	0.0104685
ZNF800	25.0977	22.4389	23.1204	19.56	8.96781	9.6274	-1.80995	-0.855953	0.00253427	0.0237613
COQ10B	40.0986	31.4932	30.9235	25.2106	12.256	18.5417	-1.81198	-0.857565	0.00123323	0.0141934
ZNF451	69.235	57.0815	61.847	42.5972	26.9034	33.5176	-1.812	-0.857584	4.99278e-05	0.00135171
WHAMM	16.1548	22.8326	28.3225	11.736	11.3592	14.2628	-1.812	-0.857584	0.00173393	0.0180778
USP25	85.9668	69.6788	95.9495	60.2012	30.4906	47.7804	-1.81248	-0.857961	0.000263268	0.00476787
BOD1L1	146.259	133.059	210.395	94.1051	82.205	94.1346	-1.81321	-0.858544	1.53909e-05	0.000545577
GOLGA8A	216.071	192.502	382.064	144.526	146.474	145.124	-1.81405	-0.859213	0.000132495	0.00285606
DENND4A	55.965	34.2489	34.6806	29.1226	14.9464	24.6034	-1.81417	-0.859312	0.00225341	0.0217939
TET3	31.7327	37.7919	44.7957	19.56	22.4195	21.3942	-1.81468	-0.859712	0.000326655	0.00562465
CNST	30.5788	28.3439	34.6806	15.8653	17.9356	18.8982	-1.8147	-0.85973	0.000367348	0.006051
NIPA1	26.2516	20.4706	25.7214	15.2133	12.256	12.1234	-1.81497	-0.85995	0.000596344	0.00850558
ANKRD11	378.196	339.34	587.835	214.29	261.86	243.181	-1.81627	-0.860978	8.50219e-05	0.00206996
SMCHD1	169.626	157.86	152.016	118.664	55.8994	88.786	-1.81631	-0.861009	7.80297e-05	0.00195339
TRIM24	23.0783	27.1629	30.6345	15.4306	13.7506	14.976	-1.81987	-0.863838	0.000729875	0.00971193
SMC4	222.129	186.204	220.8	166.477	76.5253	101.979	-1.8199	-0.863858	0.000113342	0.00256234
RC3H2	95.1982	88.181	123.983	61.2878	52.9101	54.5553	-1.82046	-0.8643	1.69945e-05	0.000582236
ATAD2	62.0231	44.4842	74.8522	40.4239	24.2131	34.9439	-1.8205	-0.864333	0.00021511	0.00409078
KDM6B	49.9069	52.3575	78.8983	24.3413	42.1487	33.5176	-1.82205	-0.865563	0.000254342	0.0046634
ZC3H12C	70.1005	49.6018	63.003	30.8613	40.3552	29.5953	-1.82297	-0.866293	3.39071e-05	0.00101975
ROCK1	148.278	154.71	188.142	109.536	66.3618	92.7083	-1.82465	-0.867618	1.6195e-05	0.000568021
TAOK1	225.014	207.068	216.464	143.657	98.9449	111.25	-1.82507	-0.867949	5.47171e-06	0.000238477
CLK1	51.9263	70.0724	55.4889	36.9466	30.4906	27.8125	-1.82616	-0.868814	3.58909e-05	0.00106495
INO80D	25.3862	23.2263	31.7905	14.344	17.6367	12.1234	-1.82899	-0.87105	0.000961485	0.0119226
SLC16A1	73.8507	94.086	110.978	59.7665	45.7358	45.9976	-1.82984	-0.871721	5.25104e-05	0.00140322
ETS1	111.641	111.407	140.745	64.9825	65.1661	69.5312	-1.83131	-0.872879	1.56247e-06	8.41587e-05
BCOR	28.8479	29.9186	39.8826	10.2146	23.6152	20.6811	-1.83158	-0.873086	0.00287709	0.0259289
SLC7A11	499.069	359.023	381.486	263.407	209.249	202.889	-1.83298	-0.874195	1.65735e-05	0.000573467
UPF3B	19.6166	16.9276	27.1664	13.9093	9.86459	10.6971	-1.83456	-0.875436	0.00198704	0.0199349
PIM3	34.329	51.1765	47.9748	18.908	31.0884	22.8205	-1.83605	-0.876608	0.000544872	0.00802102
SENP6	119.43	107.864	117.625	82.8038	43.9423	60.2604	-1.83647	-0.876932	1.65948e-05	0.000573467
MEX3C	90.294	88.5747	95.0825	51.7252	49.323	47.4239	-1.83732	-0.877606	6.08461e-06	0.000257588
SLC2A3	47.0221	64.9548	66.7601	27.3839	37.3659	32.8045	-1.83802	-0.878151	4.76187e-05	0.00130246
GOLGA8B	100.102	83.0634	118.203	56.5065	49.323	58.8341	-1.83888	-0.87883	1.08582e-05	0.000412236
USP53	24.2323	22.0453	25.1434	17.1693	9.56567	11.0537	-1.8393	-0.879157	0.000729764	0.00971193
C2CD2L	23.6553	32.2806	39.8826	14.1266	22.1206	16.0457	-1.83935	-0.879193	0.00141985	0.0156631
CENPE	77.3125	56.2941	61.558	56.7239	14.9464	33.8742	-1.84271	-0.881832	0.00381258	0.0313553
PTPN12	130.97	129.122	138.433	88.8891	55.3015	70.9575	-1.84314	-0.882168	3.78242e-06	0.000171603
RLF	35.7714	27.5566	30.6345	23.2546	11.3592	15.6891	-1.84415	-0.882956	0.00122758	0.0141528
E2F7	74.7161	73.2218	84.3893	32.3826	59.4865	34.2308	-1.8461	-0.884479	9.9785e-05	0.00233118
GPM6B	47.5991	35.0362	46.8187	23.9066	24.512	22.4639	-1.84658	-0.884856	0.000120706	0.00266535
FAM76B	17.8857	15.7466	16.1843	9.56264	9.86459	7.13141	-1.84684	-0.885058	0.00144296	0.0158785
MBNL2	89.7171	90.9367	88.7244	69.7638	34.3766	40.649	-1.84727	-0.885393	0.000204739	0.0039498
DEK	160.683	166.914	159.531	113.448	72.9382	75.5929	-1.84767	-0.88571	7.05701e-06	0.000295927
GRB10	61.1576	66.5294	78.6093	39.1199	31.9852	40.649	-1.84771	-0.885739	1.38528e-05	0.000504508
MAP3K5	41.541	33.4616	40.4606	26.2973	15.2453	20.3245	-1.84776	-0.885774	0.000478091	0.00733865
RPS6KA3	113.372	87.7874	74.2742	62.1572	43.9423	42.0753	-1.84797	-0.885939	7.64422e-05	0.00192187
AMD1	49.6184	80.7014	79.4763	48.4652	24.2131	40.2925	-1.8488	-0.886593	0.000364249	0.00601486
HMBOX1	32.8866	23.6199	33.5245	15.2133	17.9356	16.7588	-1.85099	-0.888301	0.000343007	0.00579868
AKNA	40.3871	39.7602	43.6397	21.5159	23.6152	22.1074	-1.85209	-0.889155	0.000133971	0.00287239
CCP110	29.7134	27.5566	26.0104	20.6466	10.4624	12.8365	-1.85249	-0.889467	0.00113517	0.0133776
ZC3H11A	129.527	179.118	203.17	96.2784	83.1017	96.6306	-1.85268	-0.88961	5.58768e-06	0.000241159
BRPF3	126.642	146.837	191.321	69.7638	112.397	68.8181	-1.85275	-0.889665	3.7028e-05	0.00108897
IKZF5	19.3281	18.1086	25.4324	13.04	9.56567	11.0537	-1.85406	-0.890686	0.00136056	0.0152367
NFAT5	141.066	122.824	152.883	81.2825	81.6071	60.9735	-1.85445	-0.890994	1.96253e-06	0.000102129
WRN	36.0599	39.3665	43.6397	28.2533	12.8539	22.4639	-1.85713	-0.893073	0.00101614	0.0124036
TXLNG	19.9051	18.8959	26.0104	14.344	9.86459	9.98397	-1.85898	-0.894508	0.00123903	0.0142109
RNF24	124.046	122.036	148.837	77.5878	57.0951	77.7324	-1.8596	-0.894992	1.65058e-06	8.81171e-05
EIF1	535.418	762.923	791.295	352.079	407.737	363.702	-1.8596	-0.894995	1.95397e-05	0.000649352
ZFAND1	20.7705	20.0769	14.7392	10.8666	9.86459	8.20112	-1.86299	-0.897618	0.00113923	0.013403
USP38	44.1373	40.1539	45.3737	25.4279	22.4195	21.0377	-1.86378	-0.898232	4.71053e-05	0.00129107
COL4A5	123.181	93.2987	118.203	64.3305	46.9316	68.8181	-1.86402	-0.898414	3.4036e-06	0.000157645
ALDH1L2	276.652	273.204	304.033	171.91	134.816	149.046	-1.86696	-0.900688	1.85737e-06	9.83667e-05
KLHL29	24.5207	30.3122	37.8596	17.8213	17.0388	14.2628	-1.8678	-0.901339	0.000381155	0.0062168
AKAP9	116.546	89.7557	106.932	66.7212	47.8283	52.4159	-1.86782	-0.901358	7.80332e-06	0.000319168
XBP1	144.817	168.882	151.438	88.2371	68.7532	91.282	-1.86801	-0.901506	1.49335e-06	8.12836e-05
LRRC37B	10.0968	11.0226	10.4042	6.30265	4.48391	5.70513	-1.86884	-0.902144	0.00708244	0.0491629
RBM15	19.0396	13.7783	24.5654	10.8666	11.3592	8.55769	-1.86972	-0.902821	0.00167901	0.0177138
YPEL2	15.8664	17.3213	19.0743	9.56264	7.17425	11.4103	-1.86993	-0.902988	0.000912211	0.0114436
SLC35G2	17.0203	19.6833	12.4272	9.77998	6.27747	9.6274	-1.87035	-0.903306	0.00309457	0.0272425
LUC7L2	72.9853	58.6561	99.9956	47.3786	36.4691	39.9359	-1.87052	-0.903439	4.01451e-05	0.00114549
GK	87.6977	65.7421	60.402	42.1626	34.0777	37.7965	-1.87053	-0.903448	1.51265e-05	0.000539079
OTUD1	10.6737	11.81	10.6932	6.95465	4.78283	5.34856	-1.87066	-0.90355	0.00623508	0.0448016
DDX3X	335.79	451.928	538.127	258.191	240.636	208.95	-1.8713	-0.904042	1.71401e-05	0.000585715
ZNF644	47.5991	37.0045	32.9465	28.0359	16.1421	17.8285	-1.87137	-0.904094	0.00073349	0.00975028
ZMYM2	84.8129	83.0634	83.2333	53.8985	37.067	41.3622	-1.87186	-0.904473	1.3974e-05	0.000506148
HGF	49.33	27.9502	34.9696	27.3839	14.3485	17.8285	-1.8726	-0.90504	0.00138078	0.0153804
SIPA1L2	12.6931	13.7783	20.8083	6.95465	9.86459	8.91426	-1.87351	-0.905741	0.00407786	0.0328701
INTS6	75.2931	70.8598	80.3433	41.7279	33.7788	46.3542	-1.874	-0.906118	7.45594e-06	0.00030876
KDM3A	69.812	83.8507	110.689	46.7266	46.6326	47.7804	-1.87484	-0.906765	1.676e-05	0.000577176
GPCPD1	42.6949	37.7919	35.5476	21.9506	18.2346	21.3942	-1.87639	-0.90796	0.000111837	0.00255
SHB	25.6747	28.3439	38.4376	11.5186	16.1421	22.4639	-1.87789	-0.909112	0.000968155	0.0119567
SLC25A37	26.5401	35.8235	34.9696	13.2573	22.1206	16.7588	-1.87852	-0.909597	0.00069991	0.00947444
TENT4A	56.5419	70.8598	97.6836	40.4239	37.3659	42.0753	-1.87956	-0.910396	3.62326e-05	0.00107031
CDKN2AIP	19.9051	29.5249	26.2994	12.388	14.3485	13.1931	-1.88074	-0.911303	0.000506978	0.00764606
RABGGTB	47.3106	51.5702	50.2868	33.0346	18.2346	27.0994	-1.88161	-0.911969	9.19385e-05	0.0021785
PHLPP2	23.3668	27.9502	41.9057	18.0386	14.6474	16.7588	-1.88238	-0.912558	0.000633355	0.00886231
USP34	291.653	261	319.639	185.602	133.023	143.341	-1.88366	-0.913535	3.53438e-06	0.000163096
PYROXD1	26.2516	25.5882	19.3633	16.952	10.7614	8.91426	-1.88483	-0.914437	0.000780258	0.0101886
DDX3Y	103.853	99.991	138.722	65.4172	57.6929	58.4775	-1.88517	-0.914692	1.0332e-06	5.9975e-05
PKD1	382.812	416.498	581.477	229.069	236.152	267.784	-1.88567	-0.915079	9.01497e-06	0.000357719
BTG3	38.6562	47.6335	47.3968	23.9066	19.4303	27.4559	-1.88859	-0.917311	9.82874e-05	0.00230836
COG3	70.1005	57.8688	59.824	38.9026	28.3981	31.0216	-1.88984	-0.918262	4.91149e-06	0.000216187
BDP1	80.1972	75.5837	106.354	47.1612	44.2412	47.7804	-1.8902	-0.918541	7.19194e-06	0.000299694
WEE1	32.3097	37.0045	27.7444	21.5159	13.1528	15.3325	-1.89043	-0.918713	0.000535773	0.00793099
ZNF703	55.0995	56.2941	89.3024	29.1226	49.024	28.1691	-1.89047	-0.918747	0.000205517	0.0039498
ADAMTS1	171.068	218.878	355.187	123.88	157.535	112.676	-1.89077	-0.918971	6.96224e-05	0.00179707
ANO4	42.4065	49.2082	66.7601	33.2519	26.6045	23.1771	-1.89143	-0.919476	8.81892e-05	0.00212886
MAFG	147.124	164.552	232.071	90.8451	98.347	98.4134	-1.89357	-0.921111	2.55451e-06	0.000124842
BICD1	37.7908	31.0996	40.7496	20.212	18.2346	19.9679	-1.89441	-0.921748	2.56011e-05	0.000814151
GPBP1	84.8129	70.8598	87.2794	52.8119	35.5723	38.8662	-1.89498	-0.922184	1.23019e-05	0.000455514
ABCC4	110.776	81.0951	78.3202	51.2905	43.6434	47.4239	-1.89665	-0.92345	1.22824e-05	0.000455514
ZNF316	45.8682	55.1131	67.3381	27.6013	28.697	32.8045	-1.90129	-0.926979	1.83599e-05	0.00061787
FEM1C	43.2719	43.3032	54.0439	33.0346	17.9356	22.1074	-1.90256	-0.927939	0.000160979	0.00327702
UGGT2	89.4286	83.4571	81.2103	66.7212	24.8109	41.3622	-1.90306	-0.928319	0.000392308	0.00635117
CBL	115.103	123.611	182.651	71.5025	81.0092	68.8181	-1.90522	-0.929954	3.10896e-06	0.000146033
ZNF654	31.4442	29.1312	23.9874	18.4733	13.1528	11.4103	-1.90623	-0.930722	0.000356226	0.00594141
SLC6A15	227.899	155.498	125.428	66.7212	141.094	58.8341	-1.90822	-0.932224	0.000683492	0.00929954
DYNC2H1	85.6784	73.6154	58.3789	48.2479	29.5938	35.3005	-1.90951	-0.933206	2.89498e-05	0.000899133
LRIG1	63.4654	73.2218	61.558	35.8599	28.3981	38.8662	-1.90986	-0.933467	4.2218e-06	0.000187694
SPTY2D1	58.2728	49.2082	72.8292	37.5986	34.3766	21.7508	-1.91055	-0.933989	5.02933e-05	0.00135884
MGLL	181.742	218.484	367.614	116.056	152.453	133.357	-1.9121	-0.935161	4.38588e-05	0.00122225
ATL2	45.0028	44.0905	44.5067	27.6013	20.0281	20.3245	-1.9124	-0.935386	4.64888e-05	0.00128629
SBNO1	97.2175	94.086	121.96	58.6799	54.7037	49.9199	-1.91278	-0.935673	2.03778e-06	0.000104993
SYT1	27.1171	27.5566	26.5884	15.4306	16.441	9.27083	-1.91298	-0.935819	0.000425029	0.00675019
TMEM170A	12.1161	14.5656	16.1843	8.47598	7.47318	5.70513	-1.9134	-0.936135	0.00337774	0.0289866
DSP	64.0424	77.5521	155.195	57.1585	43.0455	54.9118	-1.91364	-0.936319	0.000432265	0.00683246
RBBP8	34.6175	29.5249	39.5936	21.0813	16.441	16.0457	-1.91471	-0.937128	0.000115844	0.00260023
SPEN	141.066	152.348	288.138	87.8025	115.087	100.553	-1.91847	-0.939954	4.25425e-05	0.00119308
RAPGEF2	121.45	112.195	180.05	72.3718	75.0307	68.4615	-1.91862	-0.940068	1.96682e-06	0.000102129
NR2C2	95.7751	82.6697	105.487	48.4652	54.7037	45.2844	-1.92099	-0.941854	1.58635e-06	8.50294e-05
CENPK	21.059	21.2579	19.9413	14.5613	6.87532	9.98397	-1.92204	-0.942639	0.00128109	0.0145552
B3GALNT2	30.5788	26.7692	30.9235	18.0386	14.0496	12.8365	-1.92205	-0.942647	8.24762e-05	0.00202654
HIC1	25.6747	41.7285	30.6345	13.4746	19.7292	17.8285	-1.92215	-0.942718	0.000562631	0.00817307
RASA2	28.8479	27.1629	31.7905	19.1253	10.7614	14.976	-1.92283	-0.943229	0.000184942	0.00364752
BHLHE40	26.2516	46.8462	41.9057	17.8213	26.6045	14.976	-1.92476	-0.944676	0.000667111	0.00915161
ASH1L	154.336	154.317	238.14	104.972	79.2157	99.4831	-1.92771	-0.946887	3.06269e-06	0.00014437
SETD2	145.105	135.421	241.897	101.06	80.4114	88.4295	-1.93541	-0.95264	7.48272e-06	0.000308906
ERI1	32.5982	27.5566	26.0104	20.4293	12.256	10.6971	-1.938	-0.954571	0.000403634	0.00646447
HAUS6	67.5042	59.0498	69.6501	45.2052	21.5228	33.8742	-1.93945	-0.955648	3.93568e-05	0.00112996
RYBP	62.8885	60.2308	70.8061	39.5546	24.2131	35.657	-1.94154	-0.957202	7.12596e-06	0.000297879
JMJD1C	105.583	104.321	131.497	70.6332	40.6541	64.1827	-1.94252	-0.957926	2.55232e-06	0.000124842
SLC3A2	329.732	441.693	367.325	160.174	241.234	184.703	-1.94312	-0.958372	2.34589e-06	0.000117675
SOD2	106.16	97.2353	74.2742	45.8572	50.5187	46.3542	-1.9436	-0.95873	3.03922e-06	0.000143773
MEF2A	99.2369	99.2037	85.5454	52.1599	40.6541	52.4159	-1.94528	-0.959978	2.11342e-06	0.00010847
DNAJB11	124.046	158.647	145.658	71.5025	66.0629	82.7243	-1.94567	-0.960268	1.87646e-07	1.37054e-05
XIAP	70.389	64.9548	70.2281	36.2946	34.0777	35.3005	-1.94681	-0.961114	1.04541e-06	6.04202e-05
SMC5	59.1383	55.1131	71.3841	35.6426	30.7895	28.1691	-1.94713	-0.961346	2.32603e-06	0.000117121
SGTB	38.0793	35.4299	39.8826	23.6893	14.3485	19.2548	-1.94764	-0.961728	4.37243e-05	0.00122106
AKAP17A	107.314	112.195	138.433	51.5079	66.6607	67.0352	-1.94772	-0.961788	3.8691e-07	2.53359e-05
ATF2	51.0608	49.9955	50.8648	29.9919	20.0281	26.7428	-1.94869	-0.962507	1.03221e-05	0.000397717
PNPLA8	68.9466	64.1675	62.714	37.3812	29.2949	32.4479	-1.94947	-0.963085	1.05913e-06	6.09479e-05
MIA2	44.4258	33.0679	28.9005	18.908	20.0281	15.3325	-1.95009	-0.963543	7.83483e-05	0.001954
MINDY2	40.6756	37.7919	40.7496	21.7333	20.327	18.5417	-1.95029	-0.963692	3.08499e-05	0.000951479
PID1	33.1751	37.3982	31.5015	20.212	12.256	18.8982	-1.95032	-0.963709	0.000195762	0.0038325
SIAH2	40.3871	51.1765	58.6679	27.3839	26.3056	22.4639	-1.95378	-0.966267	1.92078e-05	0.000639924
UFM1	98.083	96.448	78.8983	59.3319	38.8605	40.2925	-1.95402	-0.966442	7.73798e-06	0.000317472
SMAD7	56.8304	50.3892	68.7831	32.8173	26.0067	31.3782	-1.95421	-0.966582	3.35219e-06	0.000155955
ZFY	25.0977	24.8009	26.8774	14.1266	9.56567	15.6891	-1.95435	-0.966692	0.000257479	0.00469983
PKMYT1	11.5392	20.0769	24.8544	9.77998	8.96781	9.98397	-1.95752	-0.969028	0.00123681	0.0141977
NT5C3A	20.1936	17.7149	16.7623	15.2133	6.5764	5.34856	-1.95808	-0.969443	0.00324695	0.0280942
NXF1	168.183	203.525	310.68	108.884	120.767	119.095	-1.95828	-0.96959	4.06087e-06	0.000182369
PITPNC1	34.329	29.9186	34.9696	13.9093	22.7185	14.6194	-1.95894	-0.970073	0.000205093	0.0039498
RSRP1	115.969	120.068	135.543	65.1998	59.7854	64.1827	-1.96336	-0.973326	4.83662e-08	4.4648e-06
PLEKHF1	14.7124	12.5973	10.6932	5.65065	7.7721	6.0617	-1.96857	-0.977151	0.00479105	0.0370491
ICAM5	22.2129	17.7149	17.0513	8.47598	11.3592	9.6274	-1.97079	-0.97877	0.000351504	0.00589223
ARHGAP5	78.7549	78.3394	77.7422	58.0279	27.5013	32.4479	-1.97407	-0.981172	3.85e-05	0.00111742
RAPGEF6	26.2516	24.0136	31.2125	13.4746	14.0496	14.2628	-1.97694	-0.983268	0.000108935	0.00250099
PHLPP1	12.6931	13.3846	15.3172	7.17198	6.87532	6.77484	-1.97833	-0.984285	0.00220672	0.0214273
EVC2	15.2894	17.7149	25.1434	10.2146	7.17425	12.1234	-1.9837	-0.988193	0.000795145	0.010302
SLC7A1	147.124	147.231	186.986	75.1971	83.6996	84.8638	-1.98545	-0.989467	1.32854e-07	1.03884e-05
GADD45A	59.1383	67.7104	73.9852	29.7746	40.6541	31.0216	-1.9861	-0.98994	1.56377e-06	8.41587e-05
RB1	72.4083	62.1991	74.2742	41.0759	31.0884	31.7348	-1.98816	-0.991435	1.46705e-06	8.02532e-05
PPP1R15B	88.2747	66.5294	83.8113	41.0759	42.1487	37.0833	-1.99034	-0.993017	4.66412e-07	2.99517e-05
WAC	197.031	205.887	282.936	129.313	99.8417	114.816	-1.99212	-0.994306	4.18842e-07	2.70275e-05
IRAK2	19.0396	20.0769	17.6293	8.04131	9.26674	11.7668	-1.99596	-0.997084	0.000260188	0.00472498
ZBTB20	29.7134	23.2263	34.6806	17.3866	15.5442	10.3405	-1.99788	-0.998472	0.000158583	0.00325297
NR1D1	16.1548	17.3213	22.8314	4.99865	15.2453	8.20112	-1.99905	-0.999318	0.00228813	0.0220726
ENC1	21.6359	43.6969	30.0565	24.7759	8.07103	14.2628	-2.00018	-1.00013	0.00272113	0.0250152
PATL1	86.2553	109.833	133.231	53.2465	60.3833	50.633	-2.00312	-1.00225	6.1601e-07	3.82646e-05
MTRNR2L8	11.5392	13.3846	20.5193	5.65065	11.0603	6.0617	-2.00993	-1.00714	0.0035021	0.0296518
NUP58	78.1779	79.1267	89.5914	44.1186	38.8605	38.8662	-2.01026	-1.00738	3.51679e-07	2.34918e-05
REV3L	119.719	89.7557	109.822	66.0692	36.4691	55.625	-2.01468	-1.01055	4.1617e-06	0.000186268
CCSER2	74.4277	74.7964	77.7422	49.7692	28.3981	33.161	-2.01628	-1.01169	3.90396e-06	0.000175916
CCNL1	76.1585	75.5837	97.6836	41.7279	37.6648	44.9279	-2.01692	-1.01215	6.32085e-07	3.90805e-05
HNRNPDL	349.348	383.43	451.714	215.594	182.644	186.843	-2.02069	-1.01485	1.45287e-07	1.09733e-05
ZGRF1	10.0968	12.5973	11.5602	7.17198	5.38069	3.20913	-2.02131	-1.01529	0.00321355	0.0278836
CREG1	27.4055	20.8643	11.2712	12.8226	5.97854	10.3405	-2.02377	-1.01704	0.00282231	0.0256263
FAM13B	40.6756	46.8462	42.1947	28.0359	12.256	23.1771	-2.02567	-1.0184	0.000210437	0.00402494
BMP2K	35.7714	30.3122	31.7905	16.952	14.3485	17.1154	-2.02676	-1.01917	3.75166e-05	0.00109606
CSPP1	19.6166	20.4706	23.6984	12.1706	7.47318	11.4103	-2.02748	-1.01969	0.000293262	0.00517019
USP1	52.2148	54.7195	52.3098	36.7292	17.9356	22.8205	-2.02813	-1.02015	2.54692e-05	0.000811901
SLC25A33	6.9235	14.5656	11.2712	5.86799	5.38069	4.27885	-2.02844	-1.02037	0.00577213	0.0423215
YOD1	14.1355	10.629	15.3172	7.60665	7.17425	4.63542	-2.02898	-1.02075	0.00282189	0.0256263
GFPT1	233.38	231.869	233.805	119.316	118.375	104.475	-2.02924	-1.02094	1.86424e-08	1.98251e-06
ZRANB1	72.9853	82.6697	98.2616	48.4652	33.1809	42.7885	-2.03067	-1.02196	2.6198e-06	0.000127098
LIN54	34.329	34.2489	39.3046	20.4293	15.8431	15.6891	-2.0337	-1.0241	1.40868e-05	0.000508848
POU2F1	17.8857	20.0769	25.4324	10.432	11.0603	9.6274	-2.03382	-1.02419	0.000224468	0.0042505
ESF1	19.6166	16.1403	21.9644	10.432	7.7721	10.3405	-2.03473	-1.02483	0.000203707	0.00394142
THSD4	107.026	88.181	152.305	57.1585	55.8994	58.121	-2.03511	-1.02511	3.12546e-07	2.14159e-05
ATXN7	48.4645	53.5385	76.2972	31.5133	28.3981	27.4559	-2.03585	-1.02563	2.91499e-06	0.000138885
EPB41	12.4046	21.2579	15.6062	7.17198	10.1635	6.41827	-2.03594	-1.02569	0.00129442	0.014637
NET1	16.1548	20.0769	33.5245	12.388	8.36996	13.5497	-2.03749	-1.02679	0.000660289	0.00909193
SYNE1	196.743	205.1	319.061	108.014	129.137	115.885	-2.04438	-1.03166	4.99164e-07	3.17483e-05
USP49	16.7318	11.4163	12.4272	7.60665	7.17425	4.63542	-2.04526	-1.03229	0.00267273	0.0247049
NAA16	27.4055	22.8326	32.0795	17.604	9.56567	12.48	-2.04706	-1.03355	0.000200134	0.00388945
EZH2	32.0212	38.9729	52.0208	20.8639	16.7399	22.4639	-2.05129	-1.03653	5.60059e-05	0.001486
MYO10	247.227	277.534	428.016	162.782	132.724	168.658	-2.05333	-1.03797	1.19965e-06	6.81492e-05
PLCB1	12.1161	8.26697	10.6932	5.65065	3.88605	5.70513	-2.05626	-1.04002	0.00310145	0.0272669
EPHA4	16.1548	10.629	13.2942	6.95465	6.5764	6.0617	-2.05635	-1.04009	0.00191529	0.0194055
SEC63	199.916	188.566	208.95	112.144	78.3189	99.1266	-2.05674	-1.04036	2.33879e-08	2.37325e-06
ZNF131	26.5401	35.0362	34.6806	16.5173	17.6367	11.4103	-2.06223	-1.0442	4.02424e-05	0.00114549
HDAC9	13.27	13.3846	10.6932	6.95465	5.67962	4.63542	-2.07127	-1.05052	0.00261457	0.0243045
MALT1	54.2341	65.3484	80.0543	36.0772	26.3056	33.5176	-2.07382	-1.05229	8.73111e-07	5.11289e-05
EPC2	43.5604	54.3258	51.1538	22.1679	25.7077	23.8902	-2.07433	-1.05265	7.03607e-07	4.29039e-05
ST7L	12.1161	12.991	15.0282	8.69331	3.58713	6.41827	-2.07513	-1.0532	0.00348939	0.029567
RB1CC1	170.491	154.71	153.461	101.712	57.0951	70.6009	-2.07686	-1.05441	2.56355e-07	1.80303e-05
USF3	42.118	32.6742	45.9517	19.7773	21.2238	17.472	-2.07792	-1.05514	1.39034e-05	0.000504967
GOLGB1	336.944	309.815	412.988	180.821	157.236	171.154	-2.08155	-1.05766	6.78356e-08	6.01159e-06
ARHGAP26	10.9622	7.08598	10.9822	4.56399	4.18498	5.70513	-2.08259	-1.05838	0.00433925	0.0344303
MOSMO	28.5595	21.2579	27.4554	14.1266	12.5549	9.98397	-2.08299	-1.05866	4.07724e-05	0.00115317
AFF4	309.25	293.281	385.243	167.781	162.018	143.698	-2.08397	-1.05934	4.34264e-08	4.09409e-06
PRUNE2	57.1189	20.8643	37.2816	25.2106	5.08176	24.9599	-2.08569	-1.06053	0.00710408	0.0492552
UVRAG	34.6175	29.9186	39.0156	19.1253	14.3485	15.6891	-2.08631	-1.06095	2.27501e-05	0.000737603
SEL1L	385.408	380.674	360.678	214.29	141.99	182.564	-2.08653	-1.0611	1.08691e-07	8.91867e-06
CHD2	281.267	289.738	455.471	155.61	173.378	162.953	-2.08813	-1.06221	3.77364e-07	2.48332e-05
TBC1D15	54.5226	58.6561	54.6219	33.2519	20.0281	25.6731	-2.0882	-1.06226	3.13263e-06	0.000146627
PTP4A1	142.22	131.878	167.623	95.1918	59.4865	55.625	-2.08967	-1.06327	2.42607e-07	1.73051e-05
ARID4B	89.4286	72.4344	95.6605	46.5092	40.3552	35.657	-2.09004	-1.06353	4.86281e-07	3.10776e-05
ABHD3	9.8083	11.4163	13.2942	5.65065	4.48391	6.41827	-2.09041	-1.06378	0.00182853	0.0187407
HACE1	40.6756	32.2806	30.9235	17.8213	16.441	14.976	-2.09237	-1.06514	1.96198e-05	0.000650389
SCML1	12.9816	11.81	24.2764	9.56264	6.27747	7.48798	-2.09241	-1.06517	0.00176004	0.0182926
NRG1	13.847	25.5882	30.3455	12.6053	8.36996	12.1234	-2.09424	-1.06642	0.000452023	0.0070691
USP36	77.3125	83.8507	99.9956	42.5972	41.5509	40.2925	-2.0954	-1.06723	1.63865e-07	1.21691e-05
EPC1	48.176	46.8462	60.691	25.8626	23.3163	25.3165	-2.09604	-1.06767	8.36376e-07	4.94131e-05
ATP2B1	191.839	157.86	164.733	104.754	64.2693	74.5232	-2.10332	-1.07267	9.21961e-08	7.85617e-06
KLF4	70.9659	91.724	104.042	44.7706	33.4798	48.4936	-2.10411	-1.07321	6.81791e-07	4.17652e-05
TSC22D2	59.1383	55.5068	87.8574	34.1212	31.6863	29.9519	-2.11396	-1.07995	6.06182e-07	3.78309e-05
ZBTB21	44.7143	40.1539	54.6219	23.0373	24.512	18.1851	-2.11412	-1.08006	5.09376e-06	0.000222735
PPAT	20.482	24.8009	25.1434	14.7786	8.07103	9.27083	-2.11618	-1.08146	8.74982e-05	0.0021186
CDC6	44.1373	44.4842	41.3277	21.0813	15.8431	24.6034	-2.11897	-1.08337	8.69877e-06	0.000349344
LIF	23.0783	31.0996	19.9413	15.648	6.27747	12.48	-2.11923	-1.08354	0.000226775	0.00427592
MFHAS1	25.9631	34.6426	34.6806	14.7786	17.0388	12.48	-2.11968	-1.08385	1.07523e-05	0.000410719
CCDC112	14.424	16.1403	16.1843	9.99731	5.67962	4.99199	-2.1213	-1.08495	0.000737812	0.00979794
LURAP1L	43.8489	63.7738	57.2229	26.7319	28.0991	21.7508	-2.12339	-1.08637	1.26436e-06	7.09161e-05
RASSF1	32.5982	54.3258	45.6627	22.3853	17.9356	21.3942	-2.12607	-1.08819	2.4297e-05	0.000778266
EXOC6	10.3853	9.84163	9.53715	6.08532	2.09249	5.34856	-2.12721	-1.08896	0.00549992	0.0408895
GABBR2	69.235	78.7331	169.068	44.5532	59.7854	44.5713	-2.1305	-1.09119	5.85593e-05	0.0015384
IRF1	26.2516	24.4073	18.2073	10.432	11.6582	9.98397	-2.13106	-1.09157	3.81844e-05	0.00111312
EIF5	303.769	347.213	302.588	191.47	109.706	144.054	-2.13618	-1.09504	1.35887e-07	1.04712e-05
ZNF432	23.6553	20.8643	21.3863	13.04	7.17425	9.6274	-2.13672	-1.0954	0.000111353	0.00254333
UBN2	59.4267	52.7512	72.2512	31.0786	25.4088	29.9519	-2.13783	-1.09615	1.27076e-07	1.00549e-05
SGK1	45.2913	112.195	97.6836	41.5106	42.7466	34.5873	-2.13974	-1.09743	3.15605e-05	0.000971143
PUS7	15.2894	21.6516	22.2534	9.12798	8.36996	9.98397	-2.14136	-1.09853	8.50012e-05	0.00206996
USP12	79.6203	68.1041	61.269	38.2506	30.1916	27.8125	-2.14221	-1.0991	1.34442e-07	1.04511e-05
SLC10A7	12.4046	6.69231	10.1152	5.65065	3.88605	3.92227	-2.1465	-1.10198	0.00427271	0.0339818
KDM6A	34.0406	40.1539	57.2229	22.6026	18.8324	19.2548	-2.15554	-1.10805	2.01082e-05	0.00066492
IPMK	14.424	12.991	15.6062	9.56264	4.48391	4.99199	-2.15823	-1.10985	0.00176312	0.0183103
CCDC18	22.2129	14.172	15.3172	15.2133	3.58713	4.63542	-2.16251	-1.11271	0.0051997	0.0391835
WDR47	33.4636	42.1222	56.3559	23.9066	16.441	19.9679	-2.17289	-1.11962	2.10844e-05	0.000692038
CEP350	110.776	110.226	136.41	67.8078	43.3444	52.4159	-2.17327	-1.11987	1.01802e-08	1.10923e-06
CEBPG	42.4065	44.0905	45.3737	19.1253	21.8217	19.9679	-2.1739	-1.12028	1.91745e-06	0.000100349
OSBPL6	28.8479	27.5566	47.1078	13.692	13.7506	20.6811	-2.17937	-1.12391	7.24804e-05	0.00184793
NPC1	73.2737	81.8824	97.6836	37.5986	39.7573	38.8662	-2.18118	-1.12511	3.0913e-08	3.0439e-06
PTX3	56.8304	55.5068	57.5119	27.1666	20.9249	29.9519	-2.18366	-1.12675	2.4344e-07	1.73051e-05
FBXL6	13.5585	19.2896	16.1843	6.30265	10.4624	5.34856	-2.18754	-1.12931	0.000433742	0.00684766
FAR2	10.0968	10.2353	8.09213	4.34666	5.97854	2.13942	-2.18791	-1.12955	0.0051451	0.0389962
DYRK3	53.9456	53.5385	49.7088	20.6466	28.9959	22.8205	-2.19147	-1.1319	2.11105e-07	1.52512e-05
ZCCHC14	56.8304	69.6788	91.6145	31.9479	35.8713	31.7348	-2.19223	-1.1324	1.58593e-07	1.18437e-05
CHL1	19.0396	12.991	16.4733	9.77998	5.67962	6.0617	-2.19265	-1.13268	0.000390681	0.00633332
RASSF8	90.871	95.6607	118.203	53.4639	43.0455	41.3622	-2.19299	-1.1329	1.89319e-08	1.99732e-06
TUFT1	12.4046	14.172	18.7853	8.91064	5.08176	6.0617	-2.19729	-1.13572	0.000661254	0.00909193
MRNIP	68.3696	58.2625	100.574	35.6426	34.6755	33.161	-2.19905	-1.13688	2.44891e-07	1.73156e-05
ODR4	32.3097	33.8552	26.2994	18.256	11.9571	10.3405	-2.20412	-1.14021	1.0885e-05	0.000412236
SESN2	95.1982	92.5114	84.6784	32.5999	51.7144	39.9359	-2.20598	-1.14142	5.79229e-08	5.31013e-06
TGM2	56.2535	54.3258	63.87	28.4706	24.2131	26.0296	-2.2061	-1.1415	6.02588e-08	5.44816e-06
SMG1	298.288	287.769	391.601	143.005	146.773	153.682	-2.209	-1.14339	3.98327e-09	4.77024e-07
AP1AR	17.5972	22.4389	17.6293	6.95465	12.8539	6.0617	-2.21235	-1.14558	0.000131488	0.00284206
MYBL1	30.2903	31.8869	39.3046	24.9933	7.47318	12.8365	-2.213	-1.146	0.00043066	0.00681519
PLAT	183.184	244.073	254.035	95.8438	95.3577	116.242	-2.21966	-1.15034	1.42611e-09	1.87696e-07
CPNE7	197.608	209.43	311.547	105.189	106.717	110.893	-2.22852	-1.15609	6.14355e-09	7.04019e-07
CABLES1	12.9816	6.29865	11.5602	6.30265	2.09249	5.34856	-2.23106	-1.15773	0.00455819	0.0356633
ITPR1	23.6553	27.1629	25.7214	11.5186	12.8539	9.27083	-2.23174	-1.15817	1.89388e-06	9.95071e-05
HSPH1	332.617	417.285	569.917	253.41	122.56	214.299	-2.23484	-1.16017	3.77995e-06	0.000171603
CDR2	82.7936	102.353	123.116	55.8545	35.2734	45.9976	-2.23777	-1.16206	9.40888e-08	7.92332e-06
PDK1	40.9641	32.6742	34.3915	17.3866	17.6367	12.48	-2.24291	-1.16537	2.03621e-06	0.000104993
ST3GAL1	74.1392	78.3394	113.579	39.9892	37.3659	41.3622	-2.24573	-1.16719	1.02911e-07	8.54996e-06
LRRC49	16.1548	17.7149	9.82616	10.432	5.08176	3.20913	-2.24838	-1.16888	0.00285709	0.0257836
AHI1	62.6	56.2941	67.3381	30.4266	23.3163	28.8822	-2.25012	-1.17	1.12683e-08	1.2178e-06
BRAF	54.8111	54.7195	59.824	29.5573	22.4195	21.0377	-2.25777	-1.1749	7.22306e-08	6.35868e-06
HSPA13	110.199	111.407	103.464	57.1585	34.0777	52.0593	-2.25795	-1.17501	2.30456e-08	2.3565e-06
FRMPD4	19.9051	12.991	29.4785	8.91064	8.66889	10.3405	-2.26216	-1.1777	0.000155828	0.00322149
INSYN2B	56.5419	50.7828	67.9161	28.4706	21.2238	27.8125	-2.26301	-1.17824	1.06086e-07	8.75901e-06
SEMA6D	26.2516	26.3756	26.0104	15.8653	7.47318	10.3405	-2.26609	-1.18021	1.80581e-05	0.000609254
PRDM1	19.6166	25.5882	37.2816	10.8666	14.6474	10.6971	-2.28095	-1.18963	4.67692e-05	0.00128629
PIGA	11.2507	12.991	10.6932	5.65065	4.78283	4.27885	-2.28448	-1.19186	0.000301729	0.00527054
OSGIN2	38.0793	25.1946	26.0104	16.0826	10.7614	11.7668	-2.28525	-1.19236	9.92058e-06	0.00038901
FAM241A	6.05807	7.47964	9.53715	3.04266	3.58713	3.5657	-2.28774	-1.19392	0.00503912	0.0385193
ZDBF2	34.906	32.2806	38.7266	19.3426	12.5549	13.1931	-2.28806	-1.19412	3.6963e-06	0.000168848
SNX16	8.3659	8.66064	7.51412	4.34666	2.39142	3.5657	-2.28868	-1.19452	0.00459402	0.0359226
gene:ENSG00000279765	8.65438	9.84163	6.93611	4.78132	3.58713	1.78285	-2.28982	-1.19523	0.0050617	0.0386474
TM6SF1	6.34654	9.84163	6.3581	3.25999	3.2882	2.85256	-2.29093	-1.19593	0.00606118	0.0438602
TTC39B	17.0203	14.5656	15.0282	5.86799	5.38069	9.98397	-2.2925	-1.19692	0.000163937	0.00331692
CSGALNACT2	68.3696	67.7104	92.4815	40.2066	27.8002	30.6651	-2.30015	-1.20173	2.42559e-08	2.42431e-06
REL	16.1548	11.81	22.2534	10.432	3.2882	7.84455	-2.30672	-1.20584	0.000965892	0.0119438
ETS2	79.9088	105.896	129.185	38.9026	57.9919	39.5793	-2.30897	-1.20725	6.02973e-08	5.44816e-06
ING1	19.6166	26.3756	33.2355	12.8226	11.3592	9.6274	-2.30942	-1.20753	9.75014e-06	0.000383457
OGFRL1	24.2323	35.0362	36.4146	18.4733	8.66889	13.5497	-2.31512	-1.21109	1.00699e-05	0.00039221
NFKBIZ	30.8673	44.8778	44.2177	16.0826	19.4303	16.0457	-2.31572	-1.21146	3.64125e-07	2.40812e-05
FOS	27.9825	55.9005	66.1821	11.084	36.4691	17.1154	-2.3227	-1.2158	0.000470955	0.00727108
SFRP1	276.363	106.683	123.694	97.3651	31.0884	89.1426	-2.32822	-1.21923	0.000347818	0.00585549
TAF3	23.3668	33.0679	41.6167	14.1266	14.9464	12.48	-2.34648	-1.2305	3.00182e-06	0.000142511
DDX21	192.416	196.045	255.191	112.796	77.4221	82.7243	-2.34991	-1.23261	2.21929e-10	3.47072e-08
TJP2	60.2922	50.7828	98.2616	24.9933	36.768	27.0994	-2.36361	-1.24099	3.96733e-07	2.58518e-05
ST6GALNAC3	14.1355	15.3529	6.0691	5.21599	6.87532	2.49599	-2.37912	-1.25043	0.00213352	0.0209151
MAMLD1	6.05807	10.629	17.0513	3.69466	6.87532	3.5657	-2.38512	-1.25406	0.00271878	0.0250109
ID2	76.7355	124.792	171.958	57.8105	52.3122	45.9976	-2.38728	-1.25537	4.77225e-08	4.43619e-06
CHAC1	21.3475	23.6199	13.8722	8.25865	6.87532	9.27083	-2.38901	-1.25641	1.91834e-05	0.000639924
DGKH	22.5014	25.9819	30.9235	8.91064	14.0496	10.6971	-2.39283	-1.25872	2.30139e-06	0.000116321
ERRFI1	90.5825	122.824	154.328	58.8972	47.2305	46.7107	-2.39651	-1.26093	6.9823e-10	1.00887e-07
CPEB2	62.8885	93.2987	103.464	36.2946	45.138	26.0296	-2.40534	-1.26624	7.62816e-08	6.67113e-06
HSP90B1	2341.3	2415.92	2602.49	1096.88	946.104	1002.68	-2.41459	-1.27178	1.86292e-10	2.98412e-08
KIF21A	30.2903	26.7692	45.3737	16.3	10.7614	15.3325	-2.415	-1.27202	4.1939e-06	0.000187079
KLHL24	57.4074	69.2851	73.9852	32.3826	26.9034	22.1074	-2.42022	-1.27514	1.73644e-09	2.24102e-07
PSMC3IP	15.0009	18.8959	26.0104	10.432	5.08176	8.91426	-2.42353	-1.27711	3.91995e-05	0.00112788
MSH5	13.27	5.90498	14.4502	5.65065	3.58713	4.63542	-2.42388	-1.27732	0.00102171	0.0124373
HSD11B1	58.2728	52.7512	45.6627	21.5159	20.9249	22.1074	-2.42625	-1.27873	4.18911e-09	4.92795e-07
DNAJC3	177.992	162.584	169.068	79.1091	59.7854	69.1747	-2.43133	-1.28175	6.76494e-12	1.58804e-09
SLC38A2	1635.39	2212.79	2367.81	1188.38	602.637	764.487	-2.43159	-1.2819	1.82034e-07	1.33689e-05
WNT2B	8.65438	9.84163	12.1382	3.47732	4.18498	5.34856	-2.43348	-1.28302	0.000661264	0.00909193
ARL5B	50.7724	65.3484	47.3968	29.9919	18.2346	17.472	-2.4411	-1.28753	1.43632e-07	1.09103e-05
ATF4	423.776	616.086	684.074	206.031	272.323	227.492	-2.44278	-1.28852	2.95651e-09	3.63897e-07
MAFF	46.7336	60.6245	84.9674	23.2546	29.2949	26.3862	-2.44368	-1.28905	3.33339e-08	3.21093e-06
LYSMD3	53.0802	50.3892	40.7496	30.2093	12.8539	14.976	-2.44905	-1.29222	5.51686e-06	0.000239096
CCDC150	10.9622	8.26697	12.4272	4.78132	2.69034	5.70513	-2.45066	-1.29317	0.000507896	0.00764606
CSGALNACT1	21.6359	14.5656	17.3403	9.99731	2.09249	9.6274	-2.45413	-1.29521	0.000400878	0.00643583
ZNF667	12.4046	15.7466	16.7623	6.73732	5.38069	5.70513	-2.45592	-1.29626	0.000116604	0.00260945
BCL6	30.8673	52.7512	88.1464	26.5146	21.8217	21.3942	-2.45654	-1.29663	8.53458e-06	0.000344833
PIBF1	26.8286	25.1946	20.2303	11.5186	6.5764	10.6971	-2.4639	-1.30094	2.44868e-06	0.000121911
ZNF844	9.51982	10.2353	15.6062	6.95465	3.58713	3.20913	-2.46756	-1.30308	0.000526381	0.00784437
SELENOI	70.6774	51.1765	55.4889	30.6439	18.5335	21.7508	-2.47503	-1.30745	6.28428e-08	5.60651e-06
FNIP1	59.7152	63.3801	77.1642	28.9053	24.8109	26.7428	-2.47833	-1.30937	1.31191e-10	2.20749e-08
ITGA11	7.78894	19.6833	15.8953	6.51998	3.2882	7.48798	-2.48257	-1.31183	0.000991459	0.0122032
CNTNAP3	14.424	16.1403	20.8083	11.084	2.39142	6.77484	-2.48997	-1.31613	0.000505444	0.00763508
ERN1	27.694	27.5566	30.0565	12.6053	12.8539	7.84455	-2.49015	-1.31623	7.5603e-07	4.50668e-05
FAM110B	13.27	12.991	11.5602	5.43332	4.48391	4.99199	-2.49223	-1.31743	0.000126379	0.00275402
BRD2	498.492	626.715	961.518	232.546	354.826	249.599	-2.49361	-1.31824	8.10988e-08	7.0003e-06
RMND5A	50.1954	62.9865	63.581	28.6879	19.7292	21.0377	-2.49561	-1.31939	5.91208e-09	6.83385e-07
GDF15	21.9244	16.9276	17.0513	4.12932	14.3485	3.92227	-2.49796	-1.32075	0.000384465	0.00625968
SSTR1	6.05807	7.47964	11.2712	3.04266	1.79356	5.34856	-2.50029	-1.3221	0.00450385	0.0353617
VEGFA	92.6019	124.792	134.676	45.2052	46.0348	49.5633	-2.50211	-1.32315	2.53756e-11	4.96055e-09
IFRD1	77.3125	97.629	73.1182	37.1639	27.2024	33.5176	-2.50455	-1.32455	2.88453e-10	4.30833e-08
DNAJC2	48.753	46.4525	60.691	20.8639	18.8324	23.1771	-2.5046	-1.32458	1.32009e-09	1.77253e-07
UNC5B	111.065	145.263	141.034	48.4652	62.4758	47.4239	-2.50514	-1.32489	3.99898e-12	1.04232e-09
SLC38A1	338.386	344.064	383.22	158.87	148.866	112.676	-2.52365	-1.33551	1.21158e-11	2.68426e-09
RUNX1	141.066	195.258	291.028	89.1064	74.4328	84.5072	-2.52797	-1.33798	1.08725e-09	1.53753e-07
PCF11	84.236	97.2353	132.942	44.1186	39.1595	40.649	-2.53303	-1.34086	1.70502e-10	2.79812e-08
NPIPA5	24.2323	14.172	29.4785	11.3013	5.67962	9.6274	-2.54373	-1.34694	3.32671e-05	0.00100963
FGF2	196.743	181.086	184.674	94.7571	55.0026	70.2444	-2.54427	-1.34725	1.6611e-11	3.45016e-09
TOB1	45.0028	48.4208	73.4072	21.2986	20.327	24.2468	-2.54521	-1.34779	1.64498e-08	1.76344e-06
FZD8	6.34654	14.9593	24.2764	6.73732	8.07103	2.85256	-2.54694	-1.34877	0.00210151	0.0207047
KLF11	14.1355	19.6833	17.0513	4.78132	8.96781	6.41827	-2.55143	-1.35131	2.79959e-05	0.000877712
ROBO2	12.4046	10.629	18.4963	7.60665	2.69034	5.70513	-2.5534	-1.35242	0.000606205	0.00860009
INPP4B	13.27	8.66064	9.24815	6.73732	0.896781	4.27885	-2.55854	-1.35532	0.00289709	0.0260738
ARL13B	16.1548	13.7783	13.5832	6.95465	3.88605	5.70513	-2.56003	-1.35616	8.20277e-05	0.00201925
SLC25A25	22.5014	28.3439	40.4606	9.12798	14.0496	12.8365	-2.56407	-1.35844	2.74269e-06	0.00013162
COBLL1	8.07742	9.84163	10.9822	3.69466	2.98927	4.63542	-2.56749	-1.36036	0.000685221	0.00931353
KMT2C	138.47	149.593	243.053	72.1545	69.9489	64.5392	-2.56907	-1.36125	1.03467e-10	1.76332e-08
HOMER1	9.8083	7.47964	9.82616	4.34666	2.39142	3.5657	-2.58318	-1.36915	0.00108043	0.012945
SLC19A2	23.6553	23.2263	27.4554	10.8666	11.0603	5.70513	-2.59789	-1.37734	5.05779e-07	3.20158e-05
ABCA1	235.688	170.457	141.612	93.8878	20.9249	94.8477	-2.61143	-1.38484	5.33256e-05	0.00142055
FNBP4	135.585	159.434	232.938	65.8518	66.3618	69.8878	-2.61482	-1.38671	1.61569e-11	3.40911e-09
NPIPA2	12.6931	19.6833	16.7623	7.38932	8.66889	2.13942	-2.61597	-1.38735	0.000130683	0.00282926
NR1D2	50.7724	50.3892	52.8878	17.1693	24.2131	17.8285	-2.6274	-1.39364	6.80058e-10	9.93408e-08
NPIPB11	5.19263	7.87331	15.3172	4.12932	3.58713	2.85256	-2.64458	-1.40304	0.00284354	0.0257312
LARP1B	40.0986	44.4842	52.3098	19.1253	13.7506	18.5417	-2.64591	-1.40376	9.58248e-09	1.05273e-06
gene:ENSG00000266086	30.0018	32.6742	46.8187	3.69466	21.8217	16.0457	-2.64973	-1.40585	0.000296798	0.00521869
MAFK	89.7171	117.312	154.906	45.4226	45.138	45.9976	-2.65027	-1.40614	2.24653e-11	4.45718e-09
NCOA7	69.812	55.9005	64.737	25.8626	20.9249	24.9599	-2.6606	-1.41175	1.33592e-11	2.9112e-09
CEP85L	21.059	20.4706	21.6753	9.77998	5.08176	8.20112	-2.66626	-1.41482	8.48052e-07	4.98812e-05
AKAP12	285.883	295.643	465.586	88.2371	207.455	96.9872	-2.66729	-1.41537	3.49494e-07	2.34638e-05
ATP13A3	267.997	197.62	200.858	98.4518	81.0092	68.8181	-2.67359	-1.41878	1.93051e-13	6.58008e-11
CBX4	42.9834	66.1358	77.1642	21.2986	27.2024	21.0377	-2.67527	-1.41969	5.05508e-09	5.89448e-07
CTH	11.5392	14.172	9.53715	4.78132	4.78283	2.85256	-2.67917	-1.42179	8.14899e-05	0.00200973
CDC14A	5.76959	7.47964	6.64711	2.39066	2.39142	2.49599	-2.68241	-1.42353	0.0022491	0.021791
SNTB1	16.1548	12.991	18.2073	6.08532	6.5764	4.99199	-2.68509	-1.42497	1.01202e-05	0.00039221
MTHFD2	202.224	208.249	189.009	67.3732	87.2867	68.8181	-2.68597	-1.42545	1.28959e-14	5.1947e-12
MINAR1	8.07742	8.66064	10.4042	3.69466	2.69034	3.5657	-2.69402	-1.42976	0.000490973	0.0074674
ZBTB2	36.0599	38.1855	45.3737	14.996	14.9464	14.2628	-2.70204	-1.43405	9.84608e-10	1.40735e-07
PPP1R13B	4.32719	5.11765	7.22512	2.17333	2.09249	1.78285	-2.70446	-1.43534	0.00478801	0.0370475
KDR	7.78894	7.47964	8.38113	1.956	4.78283	2.13942	-2.72364	-1.44554	0.00140496	0.0155246
HIVEP2	58.8498	63.7738	107.51	24.9933	35.8713	23.5336	-2.72842	-1.44807	6.32735e-09	7.18885e-07
ZCCHC2	12.1161	17.3213	24.5654	5.65065	7.47318	6.77484	-2.73223	-1.45008	1.42823e-05	0.00051312
CHD1	63.177	79.5204	102.597	35.8599	22.4195	30.3085	-2.75506	-1.46209	1.86325e-10	2.98412e-08
gene:ENSG00000254692	21.059	21.2579	20.2303	12.6053	9.86459	0	-2.75618	-1.46267	0.0015792	0.0169566
RSRC2	99.8138	115.738	154.906	44.7706	48.4262	41.0056	-2.75744	-1.46333	4.3093e-13	1.39716e-10
NPIPB3	26.5401	30.3122	53.7549	8.25865	19.4303	12.48	-2.77001	-1.46989	6.62269e-06	0.000278593
HIVEP3	12.1161	23.6199	56.6449	10.8666	11.6582	10.6971	-2.77816	-1.47413	0.000173138	0.00346615
RPGR	10.3853	16.9276	18.4963	5.65065	7.17425	3.20913	-2.78441	-1.47737	7.12109e-05	0.00182609
FAM107B	34.6175	50.3892	66.7601	20.4293	13.4517	20.3245	-2.79239	-1.4815	6.06581e-08	5.44816e-06
DNAJB1	256.458	410.593	469.632	133.008	128.539	144.768	-2.79746	-1.48412	6.72845e-12	1.58804e-09
SLC4A4	17.0203	17.7149	19.9413	7.60665	5.97854	5.34856	-2.79798	-1.48439	7.84466e-07	4.65532e-05
AVIL	4.90415	7.87331	9.82616	1.52133	3.2882	3.5657	-2.80238	-1.48666	0.00212338	0.0208618
RBBP6	150.298	148.412	223.979	65.4172	58.5897	62.3998	-2.80412	-1.48755	1.10613e-13	3.86941e-11
EFNB2	22.2129	38.9729	60.113	11.3013	16.7399	15.3325	-2.80592	-1.48847	1.34478e-06	7.47958e-05
ABL2	133.566	136.996	248.255	56.5065	80.1125	48.137	-2.80756	-1.48932	5.66117e-10	8.36156e-08
TAF1D	100.968	127.941	99.7066	51.5079	29.8927	34.2308	-2.81133	-1.49125	1.36367e-11	2.92374e-09
NPIPB4	13.27	11.4163	18.7853	5.21599	7.17425	2.85256	-2.81489	-1.49308	6.90626e-05	0.00178609
NCR3LG1	22.5014	26.3756	36.4146	9.56264	14.9464	5.34856	-2.83169	-1.50166	1.44804e-06	7.98594e-05
MN1	4.90415	4.72398	9.24815	2.39066	2.39142	1.78285	-2.84333	-1.50758	0.00302105	0.0268262
SIRT1	41.541	50.7828	66.4711	22.8199	16.7399	15.3325	-2.85433	-1.51315	1.14177e-09	1.59764e-07
RASGRF2	9.51982	12.5973	14.1612	3.69466	5.08176	3.92227	-2.86	-1.51601	1.89064e-05	0.000634652
ABCA5	11.8277	10.2353	7.80312	4.34666	2.69034	2.85256	-2.86656	-1.51932	0.000248412	0.0045736
JMY	69.5235	71.6471	68.7831	27.1666	20.327	24.2468	-2.87835	-1.52524	5.03454e-14	1.859e-11
TAF4B	3.17327	7.08598	9.53715	1.956	2.39142	2.49599	-2.89046	-1.5313	0.00347292	0.0295298
HMOX1	678.503	665.294	539.572	172.78	301.02	175.076	-2.90257	-1.53733	1.89711e-11	3.87973e-09
IRS2	122.027	179.905	278.022	60.8532	63.3725	75.2364	-2.9104	-1.54122	4.40689e-11	8.08376e-09
TSPYL2	123.758	135.027	193.633	50.4212	56.7962	47.7804	-2.91901	-1.54548	4.70761e-15	2.01865e-12
ABCC2	3.75023	5.90498	12.7162	3.04266	2.98927	1.42628	-2.92194	-1.54693	0.00387331	0.0316654
KLHL21	174.53	251.946	312.125	65.1998	110.304	77.3758	-2.92274	-1.54732	3.79237e-12	1.00824e-09
PLK2	66.9272	96.448	125.717	31.7306	31.3873	35.657	-2.9299	-1.55085	3.14528e-11	5.97288e-09
FBXO32	68.0811	73.6154	49.1308	20.6466	22.7185	21.3942	-2.93557	-1.55364	3.21112e-12	8.71131e-10
CLGN	19.9051	15.3529	15.3172	5.43332	8.96781	2.49599	-2.94281	-1.55719	9.26293e-06	0.000365377
SHANK2	15.2894	14.9593	24.8544	6.30265	5.67962	6.77484	-2.95811	-1.56468	1.22596e-06	6.93477e-05
PRTG	4.61567	9.0543	10.1152	2.17333	2.39142	3.5657	-2.96159	-1.56637	0.000951816	0.0118137
HYOU1	512.916	693.245	680.606	196.686	231.967	207.881	-2.96418	-1.56763	1.54653e-14	5.87371e-12
RND3	154.625	175.575	211.551	65.4172	54.4047	62.3998	-2.96726	-1.56913	2.99445e-16	1.53097e-13
ARPC4-TTLL3	10.3853	6.69231	7.51412	1.52133	5.97854	0.713141	-2.97667	-1.5737	0.0029258	0.0262552
TRPA1	27.4055	26.7692	20.5193	7.82398	8.66889	8.55769	-2.97745	-1.57408	7.39907e-09	8.33524e-07
CPEB4	40.0986	40.5475	53.1768	16.3	15.5442	12.48	-2.98495	-1.57771	2.6847e-10	4.10203e-08
gene:ENSG00000285000	9.23134	14.5656	2.89005	4.78132	0.597854	3.20913	-3.0228	-1.59588	0.00634421	0.0452919
PNRC1	105.006	122.43	118.781	43.4666	34.3766	33.5176	-3.04648	-1.60714	6.2275e-16	3.06601e-13
SGIP1	20.482	14.172	22.2534	7.38932	5.67962	5.34856	-3.05396	-1.61068	1.30718e-07	1.02819e-05
RAB3IL1	2.88479	6.29865	10.1152	1.52133	3.2882	1.42628	-3.07409	-1.62016	0.00386304	0.0316398
SLC17A9	3.75023	9.84163	6.93611	0.434666	4.48391	1.78285	-3.07551	-1.62082	0.00661749	0.046716
IGFBP5	143.086	53.1448	71.9621	35.2079	15.2453	36.3702	-3.08868	-1.62699	2.67937e-07	1.87457e-05
ANK2	8.94286	6.29865	6.3581	2.17333	2.39142	2.49599	-3.09932	-1.63195	0.000461086	0.00718548
RGPD6	49.0415	25.1946	41.3277	15.4306	14.3485	6.77484	-3.12564	-1.64415	9.61622e-08	8.03952e-06
CRY1	29.1364	48.0272	57.8009	13.04	13.4517	16.7588	-3.13164	-1.64692	2.90801e-09	3.61273e-07
CD55	181.453	198.407	269.641	80.4131	63.9704	62.0433	-3.13498	-1.64845	7.66015e-17	4.07305e-14
AK4	16.1548	20.0769	25.1434	7.60665	2.98927	8.91426	-3.14075	-1.65111	3.2513e-07	2.21639e-05
RHPN2	5.19263	9.0543	8.38113	1.73866	3.58713	1.78285	-3.14939	-1.65507	0.000770097	0.0100956
SLC39A14	254.439	300.76	313.859	94.1051	89.0803	91.6386	-3.1545	-1.65741	1.11513e-18	7.41169e-16
GADD45B	45.8682	77.1584	78.6093	20.8639	20.327	22.4639	-3.16187	-1.66078	1.29428e-12	4.00114e-10
gene:ENSG00000288710	8.07742	11.81	9.82616	5.43332	2.39142	0.713141	-3.22219	-1.68804	0.000455728	0.00711032
ZNF804A	46.1567	39.7602	46.2407	19.7773	8.07103	12.1234	-3.24605	-1.69868	1.39305e-09	1.85178e-07
CSRNP1	47.3106	72.0408	78.6093	18.0386	25.4088	17.1154	-3.26157	-1.70557	1.94701e-12	5.88219e-10
PER2	3.75023	5.11765	7.22512	0.869331	1.49464	2.85256	-3.3029	-1.72373	0.00351074	0.0297061
NPIPB5	81.9281	93.2987	172.247	33.2519	36.768	34.5873	-3.32418	-1.733	2.12373e-12	6.13711e-10
CREB5	34.0406	17.7149	16.7623	8.25865	4.18498	7.84455	-3.36135	-1.74904	3.39542e-07	2.29113e-05
STX3	37.2138	48.8145	68.7831	13.04	19.4303	13.5497	-3.36898	-1.75231	8.5473e-11	1.47557e-08
HSPA2	1.73088	5.51131	13.8722	1.956	2.09249	2.13942	-3.38752	-1.76023	0.00441684	0.0348867
RFX8	6.63502	6.69231	10.6932	1.73866	3.2882	2.13942	-3.43651	-1.78094	0.000159064	0.00325297
WWC1	9.8083	6.69231	15.6062	2.60799	3.2882	3.5657	-3.47606	-1.79745	3.48474e-05	0.00103876
ANKRD12	67.2157	66.1358	63.003	28.4706	15.5442	11.4103	-3.47648	-1.79763	6.57981e-12	1.58804e-09
CBWD6	6.34654	7.08598	5.49109	3.04266	0.597854	1.06971	-3.47729	-1.79796	0.00100296	0.0122992
CXCL5	56.5419	69.2851	95.9495	18.4733	32.2841	12.8365	-3.47774	-1.79815	2.13026e-11	4.29053e-09
TGFB2	8.94286	12.5973	18.4963	5.43332	0.597854	5.34856	-3.48013	-1.79914	7.09303e-05	0.00182609
HSPA5	3706.96	4297.25	3739.14	1166.43	968.524	1214.12	-3.50612	-1.80987	4.51076e-19	3.15587e-16
GCNA	4.32719	4.33032	13.5832	1.52133	2.39142	2.49599	-3.52411	-1.81726	0.00114315	0.0134239
TMCC3	4.90415	3.14932	6.64711	0.869331	2.39142	1.06971	-3.53928	-1.82346	0.00267396	0.0247049
ERO1B	9.51982	12.991	10.1152	4.34666	2.09249	1.78285	-3.55733	-1.8308	1.69297e-05	0.000581514
SLC5A3	103.853	183.054	267.04	62.1572	55.6004	36.7268	-3.5761	-1.83839	7.16242e-12	1.64155e-09
STX16-NPEPL1	5.48111	5.11765	9.82616	0	3.2882	2.49599	-3.60903	-1.85161	0.00268032	0.0247427
RAB6B	4.90415	7.47964	5.49109	1.304	1.49464	2.13942	-3.61273	-1.85309	0.0005587	0.00814342
HS6ST3	9.23134	14.172	18.2073	4.56399	1.79356	4.99199	-3.63005	-1.85999	4.94205e-06	0.000216814
CERS1	2.30783	3.93665	4.33507	0.651998	1.19571	1.06971	-3.64073	-1.86423	0.00590421	0.0430761
LRRC56	2.59631	3.54299	4.33507	0.869331	0.896781	1.06971	-3.64081	-1.86426	0.0051414	0.0389962
PLXNA2	68.0811	92.1177	201.725	33.2519	35.2734	30.6651	-3.64654	-1.86653	1.65542e-10	2.75069e-08
GOLGA4	336.078	293.281	419.346	111.057	87.2867	88.0729	-3.65187	-1.86864	2.54883e-20	2.25878e-17
SEC24A	128.085	143.688	194.211	49.3345	34.6755	43.145	-3.65234	-1.86882	1.75647e-20	1.79606e-17
FICD	27.9825	27.5566	21.6753	8.04131	6.5764	5.34856	-3.70386	-1.88903	8.00899e-11	1.40084e-08
TMEM132B	21.6359	12.2036	24.2764	4.34666	6.5764	4.99199	-3.71236	-1.89234	2.28302e-08	2.35257e-06
SLC1A3	4.90415	6.29865	6.0691	1.304	2.39142	0.713141	-3.76365	-1.91213	0.000743762	0.0098181
EIF2AK3	75.2931	88.181	96.5275	23.9066	22.4195	22.1074	-3.77158	-1.91517	1.698e-20	1.79606e-17
CYP27B1	4.32719	4.33032	4.33507	0.651998	2.39142	0.35657	-3.78581	-1.9206	0.0036894	0.0306712
CALML4	3.17327	3.54299	5.20208	1.08666	1.79356	0	-3.81987	-1.93352	0.00540972	0.0404224
NPIPB6	2.59631	3.93665	6.3581	1.52133	1.19571	0.35657	-3.82602	-1.93584	0.00389226	0.0317812
PCDH1	2.59631	3.54299	2.89005	0.651998	1.19571	0.35657	-3.83238	-1.93824	0.00701175	0.0487741
COL4A6	15.2894	7.87331	10.6932	1.956	4.48391	2.49599	-3.87878	-1.9556	5.71723e-06	0.000243587
RASD1	10.9622	24.0136	31.2125	4.34666	8.66889	3.92227	-3.88925	-1.95949	1.97126e-07	1.43191e-05
NAMPT	109.334	94.8733	79.4763	25.4279	24.2131	22.8205	-3.89002	-1.95978	4.26879e-21	5.15864e-18
IQCN	6.34654	3.93665	12.7162	1.73866	2.09249	2.13942	-3.89681	-1.96229	0.000264155	0.00477742
EREG	29.1364	24.4073	25.1434	3.69466	11.6582	4.99199	-3.90042	-1.96363	3.18399e-09	3.88301e-07
AOC2	2.01936	4.72398	8.09213	1.08666	0.896781	1.78285	-3.95074	-1.98212	0.00303231	0.0268723
HERPUD1	334.924	466.493	319.061	96.7131	90.276	94.1346	-3.97677	-1.9916	2.54914e-23	4.23571e-20
IL11	44.1373	105.896	116.18	21.2986	28.0991	17.1154	-3.98934	-1.99615	4.67238e-12	1.19442e-09
ADAP1	4.90415	10.629	7.80312	1.52133	1.19571	3.20913	-3.991	-1.99675	0.000126096	0.00275238
HK2	38.3677	35.0362	38.4376	9.56264	8.36996	9.98397	-4.01732	-2.00623	3.65622e-15	1.62007e-12
BEX2	2.88479	2.36199	2.89005	0.434666	0.896781	0.713141	-4.04175	-2.01498	0.00685915	0.0481408
IER3	182.607	394.453	376.573	70.1985	87.2867	77.7324	-4.05324	-2.01907	2.77052e-17	1.53452e-14
TENT5C	3.17327	5.11765	5.78009	1.08666	1.19571	1.06971	-4.06151	-2.02201	0.0013618	0.0152377
HSPA1A	655.713	1089.27	1815.24	300.137	226.288	346.586	-4.07819	-2.02793	2.81248e-12	7.95453e-10
ADM2	18.4627	33.8552	28.6115	6.08532	7.7721	5.70513	-4.08736	-2.03117	5.45286e-11	9.66465e-09
MTSS1	6.63502	7.08598	8.38113	1.52133	2.39142	1.42628	-4.11709	-2.04163	4.19413e-05	0.0011812
POU2F2	4.03871	9.84163	16.1843	2.17333	3.88605	1.06971	-4.13103	-2.0465	0.000142303	0.00299468
DDIT3	63.4654	91.724	51.4428	11.736	17.9356	20.3245	-4.16165	-2.05715	1.45964e-15	6.69071e-13
PLD6	3.75023	5.51131	8.38113	1.956	1.79356	0	-4.26558	-2.09274	0.000885974	0.0111876
COL21A1	4.03871	3.14932	3.75706	0.869331	1.19571	0.35657	-4.26957	-2.09409	0.00204714	0.0203688
KDM7A	17.3088	23.6199	30.3455	4.99865	5.08176	6.77484	-4.27428	-2.09568	3.11117e-11	5.97288e-09
HSPA1B	566.862	857.403	1293.87	239.066	153.947	241.042	-4.2862	-2.0997	5.15809e-15	2.1427e-12
KLHL15	24.8092	24.0136	50.2868	9.34531	5.08176	8.20112	-4.35083	-2.12129	2.34142e-10	3.61913e-08
GEM	92.3134	130.303	176.004	29.1226	34.6755	26.7428	-4.39568	-2.13609	1.93732e-20	1.83949e-17
RIMS2	2.01936	1.96833	3.75706	0.651998	0.298927	0.713141	-4.49612	-2.16868	0.00651854	0.0462632
ITGB8	17.3088	11.81	16.7623	4.34666	2.69034	2.85256	-4.50283	-2.17083	2.50697e-08	2.48696e-06
TMEM156	4.03871	3.14932	4.33507	1.08666	0.597854	0.713141	-4.51121	-2.17352	0.00124658	0.014262
ZNF367	8.94286	6.69231	9.53715	1.73866	1.79356	2.13942	-4.5257	-2.17814	3.66723e-06	0.000168098
IL18R1	8.3659	9.44797	8.09213	1.956	0.896781	2.85256	-4.52879	-2.17912	5.71159e-06	0.000243587
ATP2A3	4.32719	11.81	4.33507	1.73866	2.09249	0.35657	-4.53187	-2.1801	0.000323164	0.00559352
RELB	23.6553	28.3439	23.4094	4.56399	6.87532	4.99199	-4.57846	-2.19486	5.21112e-13	1.64932e-10
ULBP1	6.34654	5.90498	8.38113	1.08666	1.49464	2.13942	-4.59135	-2.19892	2.70791e-05	0.000850976
SERPINE2	229.341	288.163	354.609	83.6731	25.7077	79.5152	-4.61261	-2.20558	5.40606e-14	1.94224e-11
PMAIP1	26.8286	30.3122	34.1025	5.65065	7.7721	6.41827	-4.64924	-2.21699	1.1454e-15	5.43778e-13
TSLP	4.61567	4.72398	1.73403	0.869331	0.597854	0.713141	-4.69101	-2.2299	0.00247476	0.0233478
MYLIP	6.05807	9.84163	13.2942	2.39066	0.896781	2.85256	-4.69529	-2.23122	8.83142e-06	0.000353603
gene:ENSG00000275993	10.9622	37.3982	44.7957	7.60665	4.78283	6.77484	-4.8174	-2.26826	4.09484e-09	4.86006e-07
FRMD3	2.30783	2.75566	9.53715	1.304	1.49464	0	-4.87392	-2.28508	0.00236452	0.022575
PPP1R15A	334.636	453.109	568.761	68.4598	127.642	80.5849	-4.90525	-2.29433	2.30948e-21	3.07e-18
CREBRF	63.4654	77.1584	100.574	18.6906	14.3485	15.6891	-4.90535	-2.29436	9.2572e-24	1.75794e-20
TPPP	2.88479	4.33032	8.09213	0.869331	2.09249	0	-4.91	-2.29572	0.00116133	0.0135774
TNXB	1.15392	7.08598	7.51412	1.08666	1.19571	0.713141	-5.00099	-2.32221	0.0013982	0.0155144
DNAJB9	100.391	104.321	57.2229	21.9506	13.4517	16.4022	-5.00282	-2.32274	5.97635e-20	4.96523e-17
SLC7A2	117.123	157.466	204.326	37.8159	23.9142	33.5176	-5.00955	-2.32468	2.02891e-26	6.74257e-23
TRIB3	123.469	179.511	124.85	22.1679	33.7788	28.1691	-5.1004	-2.35061	5.56728e-29	3.70029e-25
ID4	5.19263	9.84163	13.2942	2.60799	1.19571	1.42628	-5.10759	-2.35264	5.69354e-06	0.000243587
gene:ENSG00000288640	8.94286	19.2896	50.5758	5.43332	6.5764	3.20913	-5.12727	-2.35819	2.96465e-07	2.04192e-05
PELI1	9.8083	15.3529	13.2942	2.17333	2.09249	3.20913	-5.13729	-2.36101	8.02102e-09	8.95995e-07
AREG	150.586	170.063	101.152	26.0799	36.1702	19.2548	-5.15031	-2.36466	3.00888e-25	7.9994e-22
FGF18	4.03871	5.90498	10.4042	1.956	0	1.78285	-5.22661	-2.38588	0.000120686	0.00266535
ITGA9	2.30783	1.57466	2.31204	0.217333	0.597854	0.35657	-5.24877	-2.39198	0.00624955	0.0448571
ALPK3	3.17327	1.96833	2.60104	1.08666	0	0	-5.33043	-2.41425	0.00484379	0.0373267
TMEM217	3.75023	5.51131	4.91308	1.08666	0.597854	0.713141	-5.35886	-2.42193	0.000292549	0.00517019
GATA2	8.94286	17.3213	35.8366	3.69466	4.18498	3.5657	-5.38951	-2.43015	2.24245e-08	2.32882e-06
GABRR2	4.32719	7.87331	18.7853	1.956	0.896781	2.85256	-5.41858	-2.43792	1.61037e-05	0.000566313
MXD1	32.8866	37.3982	38.1486	4.99865	9.26674	6.0617	-5.42674	-2.44009	6.8998e-18	3.98779e-15
ICAM1	19.0396	16.5339	11.5602	1.73866	3.2882	3.92227	-5.48053	-2.45431	3.77263e-09	4.55905e-07
NPIPB12	11.2507	5.90498	11.8492	0.869331	1.79356	2.85256	-5.65204	-2.49877	1.33458e-06	7.45402e-05
gene:ENSG00000271793	14.424	19.6833	2.31204	3.25999	1.49464	1.42628	-5.66111	-2.50109	2.28406e-05	0.000738735
THBD	4.90415	3.14932	2.31204	0	1.19571	0.713141	-5.83629	-2.54505	0.00173085	0.0180598
PDK4	164.722	204.706	225.713	48.6825	18.8324	33.8742	-5.83697	-2.54522	3.72138e-25	8.24471e-22
CXCL3	11.8277	12.991	7.51412	1.73866	1.79356	1.78285	-5.90193	-2.56119	8.44193e-08	7.23991e-06
SLC16A6	12.9816	3.93665	2.31204	1.73866	0.597854	0.713141	-5.91665	-2.56478	0.000257582	0.00469983
MAFB	4.03871	5.90498	9.53715	0.434666	2.09249	0.713141	-6.06589	-2.60072	4.60825e-05	0.00127886
INPP5J	0.576959	2.75566	5.20208	0.869331	0.298927	0	-6.11605	-2.6126	0.00633511	0.0452701
RORA	5.48111	4.72398	4.04606	0.651998	0.597854	1.06971	-6.12904	-2.61566	0.000133547	0.00286791
TNFAIP3	39.2332	31.0996	52.0208	6.08532	6.5764	7.48798	-6.15007	-2.6206	1.8756e-19	1.38513e-16
NEFM	6.34654	16.9276	35.5476	1.73866	4.18498	3.5657	-6.22517	-2.63811	1.20765e-07	9.61852e-06
ATF3	61.7346	94.4797	73.4072	7.17198	20.9249	8.20112	-6.3259	-2.66127	1.08696e-19	8.49939e-17
TTN	2.59631	2.36199	8.09213	0.651998	0.597854	0.713141	-6.45672	-2.6908	0.000661393	0.00909193
SH3TC1	2.30783	3.93665	5.20208	1.08666	0	0.35657	-6.53129	-2.70737	0.000691879	0.00939443
C11orf96	4.03871	12.2036	8.09213	1.73866	0.597854	1.06971	-6.58307	-2.71876	5.52188e-06	0.000239096
MAP3K8	4.61567	2.36199	4.33507	0.434666	0.597854	0.713141	-6.62241	-2.72736	0.000335558	0.00573734
FHDC1	4.32719	8.66064	17.6293	1.52133	0.896781	2.13942	-6.67254	-2.73824	2.63349e-06	0.000127298
STC1	80.1972	92.1177	105.487	9.77998	21.5228	9.27083	-6.84626	-2.77532	1.03681e-26	4.59413e-23
LAMC2	6.63502	11.0226	21.0973	1.73866	2.39142	1.42628	-6.84893	-2.77588	3.98829e-08	3.81413e-06
CMYA5	6.05807	10.2353	11.8492	1.304	1.49464	1.06971	-7.00046	-2.80745	1.5425e-07	1.15844e-05
KLHDC7B	2.01936	5.51131	3.46806	0.651998	0.597854	0	-7.1649	-2.84095	0.000706732	0.00952897
OLAH	3.46175	3.14932	4.04606	0.434666	0.896781	0	-7.22092	-2.85218	0.000398446	0.00642784
RRAD	16.4433	24.0136	11.8492	1.73866	3.2882	2.13942	-7.24554	-2.85709	4.5001e-11	8.08376e-09
HID1	5.48111	6.29865	3.46806	0.651998	0.597854	0.713141	-7.26697	-2.86135	6.67833e-05	0.00173051
BMP6	31.7327	24.4073	41.3277	6.30265	2.09249	4.63542	-7.27939	-2.86382	6.63323e-18	3.98779e-15
IFITM10	2.30783	7.08598	3.46806	1.08666	0	0.35657	-7.34218	-2.87621	0.000472277	0.00727745
HES1	15.8664	58.6561	57.5119	1.956	14.3485	1.42628	-7.41096	-2.88966	7.90019e-08	6.86387e-06
CDK5R1	8.94286	19.2896	22.5424	1.73866	4.18498	0.713141	-7.46941	-2.90099	2.22539e-09	2.81734e-07
gene:ENSG00000285130	4.61567	10.629	4.33507	1.08666	1.19571	0	-7.51421	-2.90962	3.00067e-05	0.000929788
INHBE	15.8664	21.6516	10.1152	1.956	1.79356	2.13942	-7.89393	-2.98074	3.76687e-11	7.05253e-09
CSPG5	2.01936	6.69231	7.51412	0.651998	1.19571	0	-7.96474	-2.99363	0.000112214	0.00255422
DNAH12	2.59631	1.181	1.44502	0.434666	0	0	-8.20316	-3.03618	0.00697819	0.0486424
MYH3	2.01936	1.181	2.02303	0.434666	0	0	-8.20317	-3.03618	0.00631997	0.0452329
MYO16	0.865438	1.57466	5.20208	0.217333	0.597854	0	-8.27647	-3.04902	0.00362416	0.0303087
TINCR	1.73088	5.51131	9.53715	0.869331	0.597854	0.35657	-8.37138	-3.06547	9.89543e-05	0.00231584
HSPA6	14.424	38.1855	81.4993	6.30265	2.39142	6.77484	-8.61515	-3.10688	7.36997e-12	1.66049e-09
NEURL1	1.15392	1.57466	2.89005	0.217333	0.298927	0	-8.67564	-3.11697	0.00539682	0.0404169
KCNQ5	2.88479	1.57466	3.46806	0.217333	0.298927	0.35657	-8.79335	-3.13641	0.000999202	0.0122758
LAMP3	9.51982	17.3213	6.64711	1.304	0.597854	1.78285	-8.83816	-3.14375	1.97566e-08	2.06791e-06
ARTN	0.576959	2.36199	3.17905	0.217333	0.298927	0	-9.27175	-3.21284	0.00560788	0.0414603
COL11A1	8.07742	4.72398	9.24815	1.956	0	0	-9.36574	-3.22739	2.47433e-06	0.000121964
FAM71E2	2.01936	2.36199	6.64711	0.651998	0.298927	0	-9.44446	-3.23947	0.000464844	0.00721866
NR4A1	13.847	53.5385	72.8292	2.82533	8.96781	2.49599	-9.75399	-3.28599	3.13772e-12	8.68952e-10
C1orf116	0.865438	1.96833	3.46806	0.434666	0	0	-9.77845	-3.28961	0.00438132	0.0346878
BHLHA15	6.05807	15.3529	8.38113	0.651998	0.597854	1.78285	-9.95166	-3.31494	4.66313e-08	4.36528e-06
CYP1A1	3.17327	12.5973	13.2942	1.08666	0.298927	1.42628	-10.0065	-3.32287	3.55937e-07	2.36573e-05
OCLN	2.88479	2.75566	3.75706	0.434666	0.298927	0	-10.1319	-3.34083	0.000420533	0.00669478
NR4A2	23.3668	66.9231	91.0365	6.73732	4.48391	6.41827	-10.1966	-3.35002	3.99538e-18	2.52908e-15
H2BC6	0.865438	1.57466	4.33507	0.217333	0	0.35657	-10.3729	-3.37474	0.00333442	0.0287075
IL6	9.23134	17.7149	9.53715	1.08666	1.49464	0.713141	-10.4166	-3.38081	1.21026e-09	1.65632e-07
NPC1L1	3.17327	2.36199	4.33507	0.217333	0.298927	0.35657	-10.7962	-3.43245	0.00024545	0.00454424
NR4A3	2.88479	9.84163	19.6523	0.869331	1.19571	0.713141	-11.2124	-3.48702	2.95722e-07	2.04192e-05
BIRC3	6.05807	8.26697	6.3581	0	0.896781	1.06971	-11.4152	-3.51288	1.16271e-06	6.66203e-05
DLX2	4.90415	7.87331	14.1612	0.869331	0.298927	1.06971	-11.5859	-3.5343	1.12238e-07	9.04231e-06
GDF9	1.73088	3.54299	5.78009	0.217333	0.597854	0	-11.7896	-3.55945	0.000273382	0.00489766
ATP6V1FNB	3.75023	5.51131	11.5602	0.651998	0.298927	0.713141	-11.8116	-3.56214	2.47726e-06	0.000121964
COX6B2	0.576959	2.36199	7.22512	0.651998	0	0	-11.864	-3.56852	0.00125057	0.0142939
KLF5	8.07742	11.81	27.4554	1.52133	1.19571	1.06971	-12.0028	-3.5853	4.45718e-11	8.08376e-09
EPPK1	1.4424	1.57466	5.20208	0	0	0.713141	-12.0931	-3.59611	0.00149843	0.0163536
HBEGF	10.6737	37.3982	43.9287	1.304	3.88605	2.13942	-12.5298	-3.64729	1.37415e-14	5.37252e-12
NEB	4.61567	4.72398	13.5832	0.434666	0.896781	0.35657	-12.94	-3.69376	7.41566e-07	4.48075e-05
TCIM	0.865438	2.75566	1.73403	0.217333	0	0	-13.2496	-3.72788	0.00681165	0.0478327
CXCL2	10.6737	14.9593	10.4042	1.304	0	1.06971	-13.4633	-3.75096	2.71565e-10	4.10218e-08
GCH1	2.30783	0.787331	2.02303	0.217333	0	0	-14.0529	-3.81279	0.00540966	0.0404224
SCG2	1.73088	1.57466	2.02303	0.217333	0	0	-14.0556	-3.81307	0.00466951	0.0363631
RAB33A	1.73088	2.36199	1.44502	0	0.298927	0	-14.0567	-3.81319	0.00472871	0.0366738
SCG5	3.75023	2.75566	2.89005	0	0	0.713141	-14.3462	-3.84259	0.000385353	0.00626222
ADM5	1.4424	2.36199	2.31204	0	0.298927	0	-15.6764	-3.97052	0.00338155	0.0290006
CCNP	3.17327	3.54299	4.62407	0	0.597854	0	-17.1849	-4.10307	0.000119621	0.00265462
AMH	2.59631	5.11765	4.04606	0	0.597854	0	-17.1915	-4.10363	0.000138569	0.00295333
PTGS2	24.2323	29.5249	35.2586	2.39066	0	2.49599	-17.4471	-4.12492	5.58912e-22	8.25513e-19
SEMA4D	5.48111	11.0226	20.8083	0.434666	0.896781	0.713141	-17.8694	-4.15942	1.48575e-09	1.93629e-07
CXCL8	109.911	103.928	68.2051	4.56399	4.18498	6.41827	-18.756	-4.22928	8.24497e-49	1.096e-44
RAB39B	3.46175	3.93665	1.15602	0.217333	0	0	-21.8292	-4.44819	0.00113033	0.0133441
FNDC7	0.576959	2.75566	5.78009	0.217333	0	0	-24.3186	-4.60399	0.00123223	0.0141934
ARC	8.07742	13.7783	29.4785	0.651998	0	0.713141	-34.4986	-5.10847	6.80948e-12	1.58804e-09
PYGM	1.15392	3.54299	8.38113	0.217333	0	0	-34.7324	-5.11821	0.000257998	0.00469983
gene:ENSG00000262526	0	28.3439	0	0	0.298927	0	-69.8692	-6.12659	0.000115095	0.00259315
gene:ENSG00000257411	0	13.7783	0	0	0	0	-123.323	-6.94629	0.00595671	0.0433402
PDCD6-AHRR	0	56.2941	8.38113	0	0	0	-577.236	-9.17302	0.000149392	0.00310291

## Sheet: mRNA
Name	CPM	CPM	CPM	CPM	CPM	CPM	Fold change	Log fold change	P-value	FDR p-value
CXCL8	109.911	103.928	68.2051	4.56399	4.18498	6.41827	-18.756	-4.22928	8.24497e-49	1.096e-44
TRIB3	123.469	179.511	124.85	22.1679	33.7788	28.1691	-5.1004	-2.35061	5.56728e-29	3.70029e-25
STC1	80.1972	92.1177	105.487	9.77998	21.5228	9.27083	-6.84626	-2.77532	1.03681e-26	4.59413e-23
SLC7A2	117.123	157.466	204.326	37.8159	23.9142	33.5176	-5.00955	-2.32468	2.02891e-26	6.74257e-23
AREG	150.586	170.063	101.152	26.0799	36.1702	19.2548	-5.15031	-2.36466	3.00888e-25	7.9994e-22
PDK4	164.722	204.706	225.713	48.6825	18.8324	33.8742	-5.83697	-2.54522	3.72138e-25	8.24471e-22
CREBRF	63.4654	77.1584	100.574	18.6906	14.3485	15.6891	-4.90535	-2.29436	9.2572e-24	1.75794e-20
HERPUD1	334.924	466.493	319.061	96.7131	90.276	94.1346	-3.97677	-1.9916	2.54914e-23	4.23571e-20
PTGS2	24.2323	29.5249	35.2586	2.39066	0	2.49599	-17.4471	-4.12492	5.58912e-22	8.25513e-19
PPP1R15A	334.636	453.109	568.761	68.4598	127.642	80.5849	-4.90525	-2.29433	2.30948e-21	3.07e-18
NAMPT	109.334	94.8733	79.4763	25.4279	24.2131	22.8205	-3.89002	-1.95978	4.26879e-21	5.15864e-18
EIF2AK3	75.2931	88.181	96.5275	23.9066	22.4195	22.1074	-3.77158	-1.91517	1.698e-20	1.79606e-17
SEC24A	128.085	143.688	194.211	49.3345	34.6755	43.145	-3.65234	-1.86882	1.75647e-20	1.79606e-17
GEM	92.3134	130.303	176.004	29.1226	34.6755	26.7428	-4.39568	-2.13609	1.93732e-20	1.83949e-17
GOLGA4	336.078	293.281	419.346	111.057	87.2867	88.0729	-3.65187	-1.86864	2.54883e-20	2.25878e-17
DNAJB9	100.391	104.321	57.2229	21.9506	13.4517	16.4022	-5.00282	-2.32274	5.97635e-20	4.96523e-17
ATF3	61.7346	94.4797	73.4072	7.17198	20.9249	8.20112	-6.3259	-2.66127	1.08696e-19	8.49939e-17
TNFAIP3	39.2332	31.0996	52.0208	6.08532	6.5764	7.48798	-6.15007	-2.6206	1.8756e-19	1.38513e-16
HSPA5	3706.96	4297.25	3739.14	1166.43	968.524	1214.12	-3.50612	-1.80987	4.51076e-19	3.15587e-16
SLC39A14	254.439	300.76	313.859	94.1051	89.0803	91.6386	-3.1545	-1.65741	1.11513e-18	7.41169e-16
NR4A2	23.3668	66.9231	91.0365	6.73732	4.48391	6.41827	-10.1966	-3.35002	3.99538e-18	2.52908e-15
MXD1	32.8866	37.3982	38.1486	4.99865	9.26674	6.0617	-5.42674	-2.44009	6.8998e-18	3.98779e-15
BMP6	31.7327	24.4073	41.3277	6.30265	2.09249	4.63542	-7.27939	-2.86382	6.63323e-18	3.98779e-15
IER3	182.607	394.453	376.573	70.1985	87.2867	77.7324	-4.05324	-2.01907	2.77052e-17	1.53452e-14
CD55	181.453	198.407	269.641	80.4131	63.9704	62.0433	-3.13498	-1.64845	7.66015e-17	4.07305e-14
RND3	154.625	175.575	211.551	65.4172	54.4047	62.3998	-2.96726	-1.56913	2.99445e-16	1.53097e-13
PNRC1	105.006	122.43	118.781	43.4666	34.3766	33.5176	-3.04648	-1.60714	6.2275e-16	3.06601e-13
PMAIP1	26.8286	30.3122	34.1025	5.65065	7.7721	6.41827	-4.64924	-2.21699	1.1454e-15	5.43778e-13
DDIT3	63.4654	91.724	51.4428	11.736	17.9356	20.3245	-4.16165	-2.05715	1.45964e-15	6.69071e-13
HK2	38.3677	35.0362	38.4376	9.56264	8.36996	9.98397	-4.01732	-2.00623	3.65622e-15	1.62007e-12
TSPYL2	123.758	135.027	193.633	50.4212	56.7962	47.7804	-2.91901	-1.54548	4.70761e-15	2.01865e-12
HSPA1B	566.862	857.403	1293.87	239.066	153.947	241.042	-4.2862	-2.0997	5.15809e-15	2.1427e-12
MTHFD2	202.224	208.249	189.009	67.3732	87.2867	68.8181	-2.68597	-1.42545	1.28959e-14	5.1947e-12
HBEGF	10.6737	37.3982	43.9287	1.304	3.88605	2.13942	-12.5298	-3.64729	1.37415e-14	5.37252e-12
HYOU1	512.916	693.245	680.606	196.686	231.967	207.881	-2.96418	-1.56763	1.54653e-14	5.87371e-12
JMY	69.5235	71.6471	68.7831	27.1666	20.327	24.2468	-2.87835	-1.52524	5.03454e-14	1.859e-11
SERPINE2	229.341	288.163	354.609	83.6731	25.7077	79.5152	-4.61261	-2.20558	5.40606e-14	1.94224e-11
RBBP6	150.298	148.412	223.979	65.4172	58.5897	62.3998	-2.80412	-1.48755	1.10613e-13	3.86941e-11
ATP13A3	267.997	197.62	200.858	98.4518	81.0092	68.8181	-2.67359	-1.41878	1.93051e-13	6.58008e-11
PKDCC	34.329	21.6516	24.2764	77.8051	72.0414	95.5609	3.02105	1.59505	3.48682e-13	1.15876e-10
RSRC2	99.8138	115.738	154.906	44.7706	48.4262	41.0056	-2.75744	-1.46333	4.3093e-13	1.39716e-10
RELB	23.6553	28.3439	23.4094	4.56399	6.87532	4.99199	-4.57846	-2.19486	5.21112e-13	1.64932e-10
GADD45B	45.8682	77.1584	78.6093	20.8639	20.327	22.4639	-3.16187	-1.66078	1.29428e-12	4.00114e-10
CSRNP1	47.3106	72.0408	78.6093	18.0386	25.4088	17.1154	-3.26157	-1.70557	1.94701e-12	5.88219e-10
PRSS23	49.0415	52.7512	50.8648	131.052	104.624	141.915	2.4745	1.30714	2.05121e-12	6.05928e-10
NPIPB5	81.9281	93.2987	172.247	33.2519	36.768	34.5873	-3.32418	-1.733	2.12373e-12	6.13711e-10
HSPA1A	655.713	1089.27	1815.24	300.137	226.288	346.586	-4.07819	-2.02793	2.81248e-12	7.95453e-10
NR4A1	13.847	53.5385	72.8292	2.82533	8.96781	2.49599	-9.75399	-3.28599	3.13772e-12	8.68952e-10
FBXO32	68.0811	73.6154	49.1308	20.6466	22.7185	21.3942	-2.93557	-1.55364	3.21112e-12	8.71131e-10
KLHL21	174.53	251.946	312.125	65.1998	110.304	77.3758	-2.92274	-1.54732	3.79237e-12	1.00824e-09
UNC5B	111.065	145.263	141.034	48.4652	62.4758	47.4239	-2.50514	-1.32489	3.99898e-12	1.04232e-09
IL11	44.1373	105.896	116.18	21.2986	28.0991	17.1154	-3.98934	-1.99615	4.67238e-12	1.19442e-09
NREP	131.258	157.86	72.5402	609.401	277.105	471.03	3.75685	1.90952	4.96328e-12	1.24485e-09
ARC	8.07742	13.7783	29.4785	0.651998	0	0.713141	-34.4986	-5.10847	6.80948e-12	1.58804e-09
DNAJC3	177.992	162.584	169.068	79.1091	59.7854	69.1747	-2.43133	-1.28175	6.76494e-12	1.58804e-09
ANKRD12	67.2157	66.1358	63.003	28.4706	15.5442	11.4103	-3.47648	-1.79763	6.57981e-12	1.58804e-09
DNAJB1	256.458	410.593	469.632	133.008	128.539	144.768	-2.79746	-1.48412	6.72845e-12	1.58804e-09
SLC5A3	103.853	183.054	267.04	62.1572	55.6004	36.7268	-3.5761	-1.83839	7.16242e-12	1.64155e-09
HSPA6	14.424	38.1855	81.4993	6.30265	2.39142	6.77484	-8.61515	-3.10688	7.36997e-12	1.66049e-09
SLC38A1	338.386	344.064	383.22	158.87	148.866	112.676	-2.52365	-1.33551	1.21158e-11	2.68426e-09
NCOA7	69.812	55.9005	64.737	25.8626	20.9249	24.9599	-2.6606	-1.41175	1.33592e-11	2.9112e-09
TAF1D	100.968	127.941	99.7066	51.5079	29.8927	34.2308	-2.81133	-1.49125	1.36367e-11	2.92374e-09
FNBP4	135.585	159.434	232.938	65.8518	66.3618	69.8878	-2.61482	-1.38671	1.61569e-11	3.40911e-09
FGF2	196.743	181.086	184.674	94.7571	55.0026	70.2444	-2.54427	-1.34725	1.6611e-11	3.45016e-09
HMOX1	678.503	665.294	539.572	172.78	301.02	175.076	-2.90257	-1.53733	1.89711e-11	3.87973e-09
CXCL5	56.5419	69.2851	95.9495	18.4733	32.2841	12.8365	-3.47774	-1.79815	2.13026e-11	4.29053e-09
MAFK	89.7171	117.312	154.906	45.4226	45.138	45.9976	-2.65027	-1.40614	2.24653e-11	4.45718e-09
VEGFA	92.6019	124.792	134.676	45.2052	46.0348	49.5633	-2.50211	-1.32315	2.53756e-11	4.96055e-09
PLK2	66.9272	96.448	125.717	31.7306	31.3873	35.657	-2.9299	-1.55085	3.14528e-11	5.97288e-09
KDM7A	17.3088	23.6199	30.3455	4.99865	5.08176	6.77484	-4.27428	-2.09568	3.11117e-11	5.97288e-09
INHBE	15.8664	21.6516	10.1152	1.956	1.79356	2.13942	-7.89393	-2.98074	3.76687e-11	7.05253e-09
KLF5	8.07742	11.81	27.4554	1.52133	1.19571	1.06971	-12.0028	-3.5853	4.45718e-11	8.08376e-09
IRS2	122.027	179.905	278.022	60.8532	63.3725	75.2364	-2.9104	-1.54122	4.40689e-11	8.08376e-09
RRAD	16.4433	24.0136	11.8492	1.73866	3.2882	2.13942	-7.24554	-2.85709	4.5001e-11	8.08376e-09
ADM2	18.4627	33.8552	28.6115	6.08532	7.7721	5.70513	-4.08736	-2.03117	5.45286e-11	9.66465e-09
FICD	27.9825	27.5566	21.6753	8.04131	6.5764	5.34856	-3.70386	-1.88903	8.00899e-11	1.40084e-08
STX3	37.2138	48.8145	68.7831	13.04	19.4303	13.5497	-3.36898	-1.75231	8.5473e-11	1.47557e-08
KMT2C	138.47	149.593	243.053	72.1545	69.9489	64.5392	-2.56907	-1.36125	1.03467e-10	1.76332e-08
FNIP1	59.7152	63.3801	77.1642	28.9053	24.8109	26.7428	-2.47833	-1.30937	1.31191e-10	2.20749e-08
PLXNA2	68.0811	92.1177	201.725	33.2519	35.2734	30.6651	-3.64654	-1.86653	1.65542e-10	2.75069e-08
PCF11	84.236	97.2353	132.942	44.1186	39.1595	40.649	-2.53303	-1.34086	1.70502e-10	2.79812e-08
CHD1	63.177	79.5204	102.597	35.8599	22.4195	30.3085	-2.75506	-1.46209	1.86325e-10	2.98412e-08
HSP90B1	2341.3	2415.92	2602.49	1096.88	946.104	1002.68	-2.41459	-1.27178	1.86292e-10	2.98412e-08
C11orf68	38.9447	35.0362	32.6575	81.0651	102.532	86.29	2.51895	1.33282	1.90883e-10	3.02072e-08
DDX21	192.416	196.045	255.191	112.796	77.4221	82.7243	-2.34991	-1.23261	2.21929e-10	3.47072e-08
KLHL15	24.8092	24.0136	50.2868	9.34531	5.08176	8.20112	-4.35083	-2.12129	2.34142e-10	3.61913e-08
CPEB4	40.0986	40.5475	53.1768	16.3	15.5442	12.48	-2.98495	-1.57771	2.6847e-10	4.10203e-08
CXCL2	10.6737	14.9593	10.4042	1.304	0	1.06971	-13.4633	-3.75096	2.71565e-10	4.10218e-08
IFRD1	77.3125	97.629	73.1182	37.1639	27.2024	33.5176	-2.50455	-1.32455	2.88453e-10	4.30833e-08
ABL2	133.566	136.996	248.255	56.5065	80.1125	48.137	-2.80756	-1.48932	5.66117e-10	8.36156e-08
NR1D2	50.7724	50.3892	52.8878	17.1693	24.2131	17.8285	-2.6274	-1.39364	6.80058e-10	9.93408e-08
ERRFI1	90.5825	122.824	154.328	58.8972	47.2305	46.7107	-2.39651	-1.26093	6.9823e-10	1.00887e-07
ZBTB2	36.0599	38.1855	45.3737	14.996	14.9464	14.2628	-2.70204	-1.43405	9.84608e-10	1.40735e-07
RUNX1	141.066	195.258	291.028	89.1064	74.4328	84.5072	-2.52797	-1.33798	1.08725e-09	1.53753e-07
SIRT1	41.541	50.7828	66.4711	22.8199	16.7399	15.3325	-2.85433	-1.51315	1.14177e-09	1.59764e-07
gene:ENSG00000286190	20.482	19.6833	10.4042	55.8545	42.1487	53.8421	3.02201	1.59551	1.18413e-09	1.63965e-07
IL6	9.23134	17.7149	9.53715	1.08666	1.49464	0.713141	-10.4166	-3.38081	1.21026e-09	1.65632e-07
GCNT1	16.7318	12.5973	14.1612	48.8999	32.882	48.4936	2.97225	1.57156	1.22109e-09	1.65632e-07
DNAJC2	48.753	46.4525	60.691	20.8639	18.8324	23.1771	-2.5046	-1.32458	1.32009e-09	1.77253e-07
ZNF804A	46.1567	39.7602	46.2407	19.7773	8.07103	12.1234	-3.24605	-1.69868	1.39305e-09	1.85178e-07
PLAT	183.184	244.073	254.035	95.8438	95.3577	116.242	-2.21966	-1.15034	1.42611e-09	1.87696e-07
SEMA4D	5.48111	11.0226	20.8083	0.434666	0.896781	0.713141	-17.8694	-4.15942	1.48575e-09	1.93629e-07
KLHL24	57.4074	69.2851	73.9852	32.3826	26.9034	22.1074	-2.42022	-1.27514	1.73644e-09	2.24102e-07
ZMYND8	70.1005	50.3892	67.0491	126.27	144.98	138.349	2.15639	1.10862	2.10514e-09	2.69073e-07
CDK5R1	8.94286	19.2896	22.5424	1.73866	4.18498	0.713141	-7.46941	-2.90099	2.22539e-09	2.81734e-07
CCDC80	454.643	421.616	648.237	1289.22	1083.91	1315.39	2.41811	1.27388	2.44395e-09	3.06485e-07
CRY1	29.1364	48.0272	57.8009	13.04	13.4517	16.7588	-3.13164	-1.64692	2.90801e-09	3.61273e-07
ATF4	423.776	616.086	684.074	206.031	272.323	227.492	-2.44278	-1.28852	2.95651e-09	3.63897e-07
EREG	29.1364	24.4073	25.1434	3.69466	11.6582	4.99199	-3.90042	-1.96363	3.18399e-09	3.88301e-07
ICAM1	19.0396	16.5339	11.5602	1.73866	3.2882	3.92227	-5.48053	-2.45431	3.77263e-09	4.55905e-07
SMG1	298.288	287.769	391.601	143.005	146.773	153.682	-2.209	-1.14339	3.98327e-09	4.77024e-07
gene:ENSG00000275993	10.9622	37.3982	44.7957	7.60665	4.78283	6.77484	-4.8174	-2.26826	4.09484e-09	4.86006e-07
HSD11B1	58.2728	52.7512	45.6627	21.5159	20.9249	22.1074	-2.42625	-1.27873	4.18911e-09	4.92795e-07
CBX4	42.9834	66.1358	77.1642	21.2986	27.2024	21.0377	-2.67527	-1.41969	5.05508e-09	5.89448e-07
RMND5A	50.1954	62.9865	63.581	28.6879	19.7292	21.0377	-2.49561	-1.31939	5.91208e-09	6.83385e-07
CPNE7	197.608	209.43	311.547	105.189	106.717	110.893	-2.22852	-1.15609	6.14355e-09	7.04019e-07
HIVEP2	58.8498	63.7738	107.51	24.9933	35.8713	23.5336	-2.72842	-1.44807	6.32735e-09	7.18885e-07
TRPA1	27.4055	26.7692	20.5193	7.82398	8.66889	8.55769	-2.97745	-1.57408	7.39907e-09	8.33524e-07
PELI1	9.8083	15.3529	13.2942	2.17333	2.09249	3.20913	-5.13729	-2.36101	8.02102e-09	8.95995e-07
FZD2	38.9447	56.6878	40.7496	107.58	91.4717	105.188	2.25842	1.17531	8.37306e-09	9.27525e-07
LARP1B	40.0986	44.4842	52.3098	19.1253	13.7506	18.5417	-2.64591	-1.40376	9.58248e-09	1.05273e-06
CEP350	110.776	110.226	136.41	67.8078	43.3444	52.4159	-2.17327	-1.11987	1.01802e-08	1.10923e-06
AHI1	62.6	56.2941	67.3381	30.4266	23.3163	28.8822	-2.25012	-1.17	1.12683e-08	1.2178e-06
TOB1	45.0028	48.4208	73.4072	21.2986	20.327	24.2468	-2.54521	-1.34779	1.64498e-08	1.76344e-06
GFPT1	233.38	231.869	233.805	119.316	118.375	104.475	-2.02924	-1.02094	1.86424e-08	1.98251e-06
RASSF8	90.871	95.6607	118.203	53.4639	43.0455	41.3622	-2.19299	-1.1329	1.89319e-08	1.99732e-06
LAMP3	9.51982	17.3213	6.64711	1.304	0.597854	1.78285	-8.83816	-3.14375	1.97566e-08	2.06791e-06
GATA2	8.94286	17.3213	35.8366	3.69466	4.18498	3.5657	-5.38951	-2.43015	2.24245e-08	2.32882e-06
TMEM132B	21.6359	12.2036	24.2764	4.34666	6.5764	4.99199	-3.71236	-1.89234	2.28302e-08	2.35257e-06
HSPA13	110.199	111.407	103.464	57.1585	34.0777	52.0593	-2.25795	-1.17501	2.30456e-08	2.3565e-06
SEC63	199.916	188.566	208.95	112.144	78.3189	99.1266	-2.05674	-1.04036	2.33879e-08	2.37325e-06
CCDC71	9.8083	9.44797	7.51412	24.1239	25.7077	24.6034	2.7815	1.47586	2.41368e-08	2.42431e-06
CSGALNACT2	68.3696	67.7104	92.4815	40.2066	27.8002	30.6651	-2.30015	-1.20173	2.42559e-08	2.42431e-06
ITGB8	17.3088	11.81	16.7623	4.34666	2.69034	2.85256	-4.50283	-2.17083	2.50697e-08	2.48696e-06
NPC1	73.2737	81.8824	97.6836	37.5986	39.7573	38.8662	-2.18118	-1.12511	3.0913e-08	3.0439e-06
LMCD1	11.2507	14.5656	18.4963	38.6852	34.9745	41.3622	2.58177	1.36836	3.17739e-08	3.10567e-06
TUBA1A	236.553	397.996	219.065	710.678	593.669	752.72	2.41243	1.27049	3.25061e-08	3.15404e-06
MAFF	46.7336	60.6245	84.9674	23.2546	29.2949	26.3862	-2.44368	-1.28905	3.33339e-08	3.21093e-06
LAMC2	6.63502	11.0226	21.0973	1.73866	2.39142	1.42628	-6.84893	-2.77588	3.98829e-08	3.81413e-06
APCDD1L	209.436	181.873	188.72	336.214	602.936	382.957	2.27786	1.18768	4.305e-08	4.0876e-06
AFF4	309.25	293.281	385.243	167.781	162.018	143.698	-2.08397	-1.05934	4.34264e-08	4.09409e-06
BHLHA15	6.05807	15.3529	8.38113	0.651998	0.597854	1.78285	-9.95166	-3.31494	4.66313e-08	4.36528e-06
ID2	76.7355	124.792	171.958	57.8105	52.3122	45.9976	-2.38728	-1.25537	4.77225e-08	4.43619e-06
RSRP1	115.969	120.068	135.543	65.1998	59.7854	64.1827	-1.96336	-0.973326	4.83662e-08	4.4648e-06
SESN2	95.1982	92.5114	84.6784	32.5999	51.7144	39.9359	-2.20598	-1.14142	5.79229e-08	5.31013e-06
FAM107B	34.6175	50.3892	66.7601	20.4293	13.4517	20.3245	-2.79239	-1.4815	6.06581e-08	5.44816e-06
TGM2	56.2535	54.3258	63.87	28.4706	24.2131	26.0296	-2.2061	-1.1415	6.02588e-08	5.44816e-06
ETS2	79.9088	105.896	129.185	38.9026	57.9919	39.5793	-2.30897	-1.20725	6.02973e-08	5.44816e-06
SELENOI	70.6774	51.1765	55.4889	30.6439	18.5335	21.7508	-2.47503	-1.30745	6.28428e-08	5.60651e-06
GOLGB1	336.944	309.815	412.988	180.821	157.236	171.154	-2.08155	-1.05766	6.78356e-08	6.01159e-06
BRAF	54.8111	54.7195	59.824	29.5573	22.4195	21.0377	-2.25777	-1.1749	7.22306e-08	6.35868e-06
CPEB2	62.8885	93.2987	103.464	36.2946	45.138	26.0296	-2.40534	-1.26624	7.62816e-08	6.67113e-06
HES1	15.8664	58.6561	57.5119	1.956	14.3485	1.42628	-7.41096	-2.88966	7.90019e-08	6.86387e-06
BRD2	498.492	626.715	961.518	232.546	354.826	249.599	-2.49361	-1.31824	8.10988e-08	7.0003e-06
CXCL3	11.8277	12.991	7.51412	1.73866	1.79356	1.78285	-5.90193	-2.56119	8.44193e-08	7.23991e-06
ATP2B1	191.839	157.86	164.733	104.754	64.2693	74.5232	-2.10332	-1.07267	9.21961e-08	7.85617e-06
CAVIN3	43.2719	68.1041	43.6397	109.97	104.326	116.955	2.1554	1.10795	9.41763e-08	7.92332e-06
CDR2	82.7936	102.353	123.116	55.8545	35.2734	45.9976	-2.23777	-1.16206	9.40888e-08	7.92332e-06
RGPD6	49.0415	25.1946	41.3277	15.4306	14.3485	6.77484	-3.12564	-1.64415	9.61622e-08	8.03952e-06
ST3GAL1	74.1392	78.3394	113.579	39.9892	37.3659	41.3622	-2.24573	-1.16719	1.02911e-07	8.54996e-06
INSYN2B	56.5419	50.7828	67.9161	28.4706	21.2238	27.8125	-2.26301	-1.17824	1.06086e-07	8.75901e-06
SEL1L	385.408	380.674	360.678	214.29	141.99	182.564	-2.08653	-1.0611	1.08691e-07	8.91867e-06
VAMP5	2.88479	9.0543	4.04606	17.3866	26.9034	14.976	3.80637	1.92842	1.11816e-07	9.04231e-06
DLX2	4.90415	7.87331	14.1612	0.869331	0.298927	1.06971	-11.5859	-3.5343	1.12238e-07	9.04231e-06
TSC22D3	49.33	51.1765	33.5245	89.5411	124.952	84.8638	2.23965	1.16327	1.11636e-07	9.04231e-06
NEFM	6.34654	16.9276	35.5476	1.73866	4.18498	3.5657	-6.22517	-2.63811	1.20765e-07	9.61852e-06
MT1E	35.7714	40.5475	29.1895	76.2838	63.0736	88.4295	2.16752	1.11604	1.20838e-07	9.61852e-06
UBN2	59.4267	52.7512	72.2512	31.0786	25.4088	29.9519	-2.13783	-1.09615	1.27076e-07	1.00549e-05
SGIP1	20.482	14.172	22.2534	7.38932	5.67962	5.34856	-3.05396	-1.61068	1.30718e-07	1.02819e-05
SLC7A1	147.124	147.231	186.986	75.1971	83.6996	84.8638	-1.98545	-0.989467	1.32854e-07	1.03884e-05
USP12	79.6203	68.1041	61.269	38.2506	30.1916	27.8125	-2.14221	-1.0991	1.34442e-07	1.04511e-05
EIF5	303.769	347.213	302.588	191.47	109.706	144.054	-2.13618	-1.09504	1.35887e-07	1.04712e-05
LOXL1	66.3502	63.7738	63.003	149.525	95.9556	146.194	2.02841	1.02035	1.36276e-07	1.04712e-05
RHOB	87.4092	127.941	92.1925	257.974	153.35	257.8	2.1798	1.12419	1.37938e-07	1.0538e-05
ARL5B	50.7724	65.3484	47.3968	29.9919	18.2346	17.472	-2.4411	-1.28753	1.43632e-07	1.09103e-05
HNRNPDL	349.348	383.43	451.714	215.594	182.644	186.843	-2.02069	-1.01485	1.45287e-07	1.09733e-05
CMYA5	6.05807	10.2353	11.8492	1.304	1.49464	1.06971	-7.00046	-2.80745	1.5425e-07	1.15844e-05
ZCCHC14	56.8304	69.6788	91.6145	31.9479	35.8713	31.7348	-2.19223	-1.1324	1.58593e-07	1.18437e-05
USP36	77.3125	83.8507	99.9956	42.5972	41.5509	40.2925	-2.0954	-1.06723	1.63865e-07	1.21691e-05
MARCHF2	6.34654	5.90498	5.78009	17.3866	20.0281	17.472	3.01669	1.59297	1.74153e-07	1.28612e-05
SLC38A2	1635.39	2212.79	2367.81	1188.38	602.637	764.487	-2.43159	-1.2819	1.82034e-07	1.33689e-05
DNAJB11	124.046	158.647	145.658	71.5025	66.0629	82.7243	-1.94567	-0.960268	1.87646e-07	1.37054e-05
RASD1	10.9622	24.0136	31.2125	4.34666	8.66889	3.92227	-3.88925	-1.95949	1.97126e-07	1.43191e-05
DYRK3	53.9456	53.5385	49.7088	20.6466	28.9959	22.8205	-2.19147	-1.1319	2.11105e-07	1.52512e-05
PLEKHO2	36.6369	39.3665	27.1664	71.0678	65.764	79.1586	2.10566	1.07427	2.12967e-07	1.53026e-05
PTX3	56.8304	55.5068	57.5119	27.1666	20.9249	29.9519	-2.18366	-1.12675	2.4344e-07	1.73051e-05
PTP4A1	142.22	131.878	167.623	95.1918	59.4865	55.625	-2.08967	-1.06327	2.42607e-07	1.73051e-05
MRNIP	68.3696	58.2625	100.574	35.6426	34.6755	33.161	-2.19905	-1.13688	2.44891e-07	1.73156e-05
RB1CC1	170.491	154.71	153.461	101.712	57.0951	70.6009	-2.07686	-1.05441	2.56355e-07	1.80303e-05
IGFBP5	143.086	53.1448	71.9621	35.2079	15.2453	36.3702	-3.08868	-1.62699	2.67937e-07	1.87457e-05
PINK1	67.5042	70.8598	69.0721	113.448	157.535	129.792	1.9282	0.947251	2.79658e-07	1.94633e-05
gene:ENSG00000288640	8.94286	19.2896	50.5758	5.43332	6.5764	3.20913	-5.12727	-2.35819	2.96465e-07	2.04192e-05
NR4A3	2.88479	9.84163	19.6523	0.869331	1.19571	0.713141	-11.2124	-3.48702	2.95722e-07	2.04192e-05
THSD4	107.026	88.181	152.305	57.1585	55.8994	58.121	-2.03511	-1.02511	3.12546e-07	2.14159e-05
AK4	16.1548	20.0769	25.1434	7.60665	2.98927	8.91426	-3.14075	-1.65111	3.2513e-07	2.21639e-05
CDC42EP3	37.2138	38.9729	44.7957	110.405	60.3833	102.336	2.25727	1.17458	3.31403e-07	2.24762e-05
CREB5	34.0406	17.7149	16.7623	8.25865	4.18498	7.84455	-3.36135	-1.74904	3.39542e-07	2.29113e-05
AKAP12	285.883	295.643	465.586	88.2371	207.455	96.9872	-2.66729	-1.41537	3.49494e-07	2.34638e-05
NUP58	78.1779	79.1267	89.5914	44.1186	38.8605	38.8662	-2.01026	-1.00738	3.51679e-07	2.34918e-05
CYP1A1	3.17327	12.5973	13.2942	1.08666	0.298927	1.42628	-10.0065	-3.32287	3.55937e-07	2.36573e-05
NFKBIZ	30.8673	44.8778	44.2177	16.0826	19.4303	16.0457	-2.31572	-1.21146	3.64125e-07	2.40812e-05
CHD2	281.267	289.738	455.471	155.61	173.378	162.953	-2.08813	-1.06221	3.77364e-07	2.48332e-05
AKAP17A	107.314	112.195	138.433	51.5079	66.6607	67.0352	-1.94772	-0.961788	3.8691e-07	2.53359e-05
TJP2	60.2922	50.7828	98.2616	24.9933	36.768	27.0994	-2.36361	-1.24099	3.96733e-07	2.58518e-05
ZBTB16	38.9447	7.47964	15.6062	62.1572	70.5468	68.8181	3.22725	1.6903	4.07144e-07	2.64008e-05
WAC	197.031	205.887	282.936	129.313	99.8417	114.816	-1.99212	-0.994306	4.18842e-07	2.70275e-05
PPP1R15B	88.2747	66.5294	83.8113	41.0759	42.1487	37.0833	-1.99034	-0.993017	4.66412e-07	2.99517e-05
ARID4B	89.4286	72.4344	95.6605	46.5092	40.3552	35.657	-2.09004	-1.06353	4.86281e-07	3.10776e-05
SYNE1	196.743	205.1	319.061	108.014	129.137	115.885	-2.04438	-1.03166	4.99164e-07	3.17483e-05
SLC19A2	23.6553	23.2263	27.4554	10.8666	11.0603	5.70513	-2.59789	-1.37734	5.05779e-07	3.20158e-05
CBY1	12.4046	12.991	6.93611	28.9053	26.0067	26.3862	2.5796	1.36715	5.21845e-07	3.28762e-05
RFLNB	30.8673	35.8235	35.2586	67.5905	61.579	72.7404	1.98295	0.987648	5.49021e-07	3.44252e-05
TSC22D2	59.1383	55.5068	87.8574	34.1212	31.6863	29.9519	-2.11396	-1.07995	6.06182e-07	3.78309e-05
PATL1	86.2553	109.833	133.231	53.2465	60.3833	50.633	-2.00312	-1.00225	6.1601e-07	3.82646e-05
CCNL1	76.1585	75.5837	97.6836	41.7279	37.6648	44.9279	-2.01692	-1.01215	6.32085e-07	3.90805e-05
ATP5MF	26.2516	49.6018	20.2303	70.8505	92.9663	69.1747	2.44136	1.28769	6.38264e-07	3.92798e-05
KLF4	70.9659	91.724	104.042	44.7706	33.4798	48.4936	-2.10411	-1.07321	6.81791e-07	4.17652e-05
EPC2	43.5604	54.3258	51.1538	22.1679	25.7077	23.8902	-2.07433	-1.05265	7.03607e-07	4.29039e-05
GDF6	3.17327	1.57466	3.75706	22.6026	5.38069	19.9679	5.50019	2.45948	7.23653e-07	4.39247e-05
NEB	4.61567	4.72398	13.5832	0.434666	0.896781	0.35657	-12.94	-3.69376	7.41566e-07	4.48075e-05
NIPAL3	140.489	111.407	152.883	266.885	247.512	269.567	1.92643	0.945928	7.52131e-07	4.50668e-05
CD248	203.955	169.276	155.195	367.075	290.557	399.359	1.99857	0.998971	7.55073e-07	4.50668e-05
ERN1	27.694	27.5566	30.0565	12.6053	12.8539	7.84455	-2.49015	-1.31623	7.5603e-07	4.50668e-05
SLC4A4	17.0203	17.7149	19.9413	7.60665	5.97854	5.34856	-2.79798	-1.48439	7.84466e-07	4.65532e-05
EPC1	48.176	46.8462	60.691	25.8626	23.3163	25.3165	-2.09604	-1.06767	8.36376e-07	4.94131e-05
CEP85L	21.059	20.4706	21.6753	9.77998	5.08176	8.20112	-2.66626	-1.41482	8.48052e-07	4.98812e-05
MALT1	54.2341	65.3484	80.0543	36.0772	26.3056	33.5176	-2.07382	-1.05229	8.73111e-07	5.11289e-05
HSPB1	172.511	244.466	224.846	406.412	383.523	474.952	1.97257	0.980076	1.00275e-06	5.84632e-05
DDX3Y	103.853	99.991	138.722	65.4172	57.6929	58.4775	-1.88517	-0.914692	1.0332e-06	5.9975e-05
XIAP	70.389	64.9548	70.2281	36.2946	34.0777	35.3005	-1.94681	-0.961114	1.04541e-06	6.04202e-05
PNPLA8	68.9466	64.1675	62.714	37.3812	29.2949	32.4479	-1.94947	-0.963085	1.05913e-06	6.09479e-05
BIRC3	6.05807	8.26697	6.3581	0	0.896781	1.06971	-11.4152	-3.51288	1.16271e-06	6.66203e-05
MYO10	247.227	277.534	428.016	162.782	132.724	168.658	-2.05333	-1.03797	1.19965e-06	6.81492e-05
POLR2L	38.9447	77.9457	43.3507	100.842	123.158	115.885	2.13159	1.09193	1.19784e-06	6.81492e-05
SHANK2	15.2894	14.9593	24.8544	6.30265	5.67962	6.77484	-2.95811	-1.56468	1.22596e-06	6.93477e-05
HAS2	16.1548	16.5339	11.5602	43.4666	28.697	35.3005	2.45961	1.29843	1.24097e-06	6.98993e-05
LURAP1L	43.8489	63.7738	57.2229	26.7319	28.0991	21.7508	-2.12339	-1.08637	1.26436e-06	7.09161e-05
NPIPB12	11.2507	5.90498	11.8492	0.869331	1.79356	2.85256	-5.65204	-2.49877	1.33458e-06	7.45402e-05
EFNB2	22.2129	38.9729	60.113	11.3013	16.7399	15.3325	-2.80592	-1.48847	1.34478e-06	7.47958e-05
RPS27L	77.8894	99.2037	55.4889	153.22	169.791	138.706	1.99381	0.995531	1.36688e-06	7.57082e-05
NCR3LG1	22.5014	26.3756	36.4146	9.56264	14.9464	5.34856	-2.83169	-1.50166	1.44804e-06	7.98594e-05
SPC24	7.78894	6.29865	6.64711	21.5159	14.6474	20.3245	2.71748	1.44227	1.45385e-06	7.98594e-05
RB1	72.4083	62.1991	74.2742	41.0759	31.0884	31.7348	-1.98816	-0.991435	1.46705e-06	8.02532e-05
TRAPPC1	48.753	56.6878	36.9926	84.7598	105.222	97.7003	2.02865	1.02052	1.49812e-06	8.12836e-05
XBP1	144.817	168.882	151.438	88.2371	68.7532	91.282	-1.86801	-0.901506	1.49335e-06	8.12836e-05
GADD45A	59.1383	67.7104	73.9852	29.7746	40.6541	31.0216	-1.9861	-0.98994	1.56377e-06	8.41587e-05
ETS1	111.641	111.407	140.745	64.9825	65.1661	69.5312	-1.83131	-0.872879	1.56247e-06	8.41587e-05
NR2C2	95.7751	82.6697	105.487	48.4652	54.7037	45.2844	-1.92099	-0.941854	1.58635e-06	8.50294e-05
RNF24	124.046	122.036	148.837	77.5878	57.0951	77.7324	-1.8596	-0.894992	1.65058e-06	8.81171e-05
CREB3L1	178.28	144.869	204.326	312.307	354.528	350.509	1.9209	0.941784	1.8386e-06	9.77622e-05
ALDH1L2	276.652	273.204	304.033	171.91	134.816	149.046	-1.86696	-0.900688	1.85737e-06	9.83667e-05
SLC16A2	30.8673	29.1312	31.2125	69.5465	45.4369	71.3141	2.03897	1.02784	1.86754e-06	9.85129e-05
ITPR1	23.6553	27.1629	25.7214	11.5186	12.8539	9.27083	-2.23174	-1.15817	1.89388e-06	9.95071e-05
CEBPG	42.4065	44.0905	45.3737	19.1253	21.8217	19.9679	-2.1739	-1.12028	1.91745e-06	0.000100349
RAPGEF2	121.45	112.195	180.05	72.3718	75.0307	68.4615	-1.91862	-0.940068	1.96682e-06	0.000102129
NFAT5	141.066	122.824	152.883	81.2825	81.6071	60.9735	-1.85445	-0.890994	1.96253e-06	0.000102129
PDK1	40.9641	32.6742	34.3915	17.3866	17.6367	12.48	-2.24291	-1.16537	2.03621e-06	0.000104993
SBNO1	97.2175	94.086	121.96	58.6799	54.7037	49.9199	-1.91278	-0.935673	2.03778e-06	0.000104993
MEF2A	99.2369	99.2037	85.5454	52.1599	40.6541	52.4159	-1.94528	-0.959978	2.11342e-06	0.00010847
GSN	212.032	184.235	144.213	322.957	372.762	349.082	1.93261	0.950552	2.14145e-06	0.000109066
MYL6	460.99	743.634	460.095	1018.2	1256.09	1154.22	2.06072	1.04315	2.13527e-06	0.000109066
SMO	14.1355	14.172	11.2712	33.2519	25.7077	30.6651	2.30051	1.20195	2.27186e-06	0.000115267
DGKH	22.5014	25.9819	30.9235	8.91064	14.0496	10.6971	-2.39283	-1.25872	2.30139e-06	0.000116321
SMC5	59.1383	55.1131	71.3841	35.6426	30.7895	28.1691	-1.94713	-0.961346	2.32603e-06	0.000117121
SLC3A2	329.732	441.693	367.325	160.174	241.234	184.703	-1.94312	-0.958372	2.34589e-06	0.000117675
BOLA2	0.576959	0	1.44502	7.60665	28.3981	0.713141	16.7891	4.06945	2.3578e-06	0.000117828
PIBF1	26.8286	25.1946	20.2303	11.5186	6.5764	10.6971	-2.4639	-1.30094	2.44868e-06	0.000121911
COL11A1	8.07742	4.72398	9.24815	1.956	0	0	-9.36574	-3.22739	2.47433e-06	0.000121964
PDGFRB	254.15	295.249	288.138	535.073	476.49	604.03	1.92943	0.948171	2.45995e-06	0.000121964
ATP6V1FNB	3.75023	5.51131	11.5602	0.651998	0.298927	0.713141	-11.8116	-3.56214	2.47726e-06	0.000121964
JMJD1C	105.583	104.321	131.497	70.6332	40.6541	64.1827	-1.94252	-0.957926	2.55232e-06	0.000124842
MAFG	147.124	164.552	232.071	90.8451	98.347	98.4134	-1.89357	-0.921111	2.55451e-06	0.000124842
CHCHD1	12.4046	14.172	10.4042	28.2533	29.2949	26.7428	2.31449	1.21069	2.564e-06	0.000124847
ZRANB1	72.9853	82.6697	98.2616	48.4652	33.1809	42.7885	-2.03067	-1.02196	2.6198e-06	0.000127098
FHDC1	4.32719	8.66064	17.6293	1.52133	0.896781	2.13942	-6.67254	-2.73824	2.63349e-06	0.000127298
B4GAT1	19.3281	23.2263	13.2942	44.7706	40.0562	39.5793	2.28967	1.19514	2.66422e-06	0.000128317
SLC25A25	22.5014	28.3439	40.4606	9.12798	14.0496	12.8365	-2.56407	-1.35844	2.74269e-06	0.00013162
TNS3	83.082	98.0227	89.0134	189.297	124.952	201.106	1.90988	0.93348	2.81051e-06	0.000134389
ATXN7	48.4645	53.5385	76.2972	31.5133	28.3981	27.4559	-2.03585	-1.02563	2.91499e-06	0.000138885
TAF3	23.3668	33.0679	41.6167	14.1266	14.9464	12.48	-2.34648	-1.2305	3.00182e-06	0.000142511
SOD2	106.16	97.2353	74.2742	45.8572	50.5187	46.3542	-1.9436	-0.95873	3.03922e-06	0.000143773
ASH1L	154.336	154.317	238.14	104.972	79.2157	99.4831	-1.92771	-0.946887	3.06269e-06	0.00014437
CBL	115.103	123.611	182.651	71.5025	81.0092	68.8181	-1.90522	-0.929954	3.10896e-06	0.000146033
TBC1D15	54.5226	58.6561	54.6219	33.2519	20.0281	25.6731	-2.0882	-1.06226	3.13263e-06	0.000146627
NFIL3	126.931	109.833	101.441	67.8078	61.8779	58.121	-1.78992	-0.839895	3.35538e-06	0.000155955
SMAD7	56.8304	50.3892	68.7831	32.8173	26.0067	31.3782	-1.95421	-0.966582	3.35219e-06	0.000155955
COL4A5	123.181	93.2987	118.203	64.3305	46.9316	68.8181	-1.86402	-0.898414	3.4036e-06	0.000157645
USP34	291.653	261	319.639	185.602	133.023	143.341	-1.88366	-0.913535	3.53438e-06	0.000163096
PSMB6	55.388	75.1901	49.4198	92.3664	149.762	109.111	1.95607	0.967957	3.54584e-06	0.000163096
ZNF367	8.94286	6.69231	9.53715	1.73866	1.79356	2.13942	-4.5257	-2.17814	3.66723e-06	0.000168098
ZDBF2	34.906	32.2806	38.7266	19.3426	12.5549	13.1931	-2.28806	-1.19412	3.6963e-06	0.000168848
PTPN12	130.97	129.122	138.433	88.8891	55.3015	70.9575	-1.84314	-0.882168	3.78242e-06	0.000171603
HSPH1	332.617	417.285	569.917	253.41	122.56	214.299	-2.23484	-1.16017	3.77995e-06	0.000171603
RRAGA	62.6	62.1991	48.2638	100.842	103.728	114.103	1.84165	0.880997	3.83747e-06	0.000173509
CCSER2	74.4277	74.7964	77.7422	49.7692	28.3981	33.161	-2.01628	-1.01169	3.90396e-06	0.000175916
NXF1	168.183	203.525	310.68	108.884	120.767	119.095	-1.95828	-0.96959	4.06087e-06	0.000182369
REV3L	119.719	89.7557	109.822	66.0692	36.4691	55.625	-2.01468	-1.01055	4.1617e-06	0.000186268
KIF21A	30.2903	26.7692	45.3737	16.3	10.7614	15.3325	-2.415	-1.27202	4.1939e-06	0.000187079
LRIG1	63.4654	73.2218	61.558	35.8599	28.3981	38.8662	-1.90986	-0.933467	4.2218e-06	0.000187694
CALHM5	37.2138	30.7059	20.5193	77.8051	42.4476	77.0192	2.23155	1.15804	4.56007e-06	0.000202057
CYB561A3	32.0212	39.7602	28.3225	60.4185	58.5897	69.5312	1.89909	0.925308	4.72388e-06	0.00020862
COG3	70.1005	57.8688	59.824	38.9026	28.3981	31.0216	-1.88984	-0.918262	4.91149e-06	0.000216187
HS6ST3	9.23134	14.172	18.2073	4.56399	1.79356	4.99199	-3.63005	-1.85999	4.94205e-06	0.000216814
ZBTB21	44.7143	40.1539	54.6219	23.0373	24.512	18.1851	-2.11412	-1.08006	5.09376e-06	0.000222735
TAOK1	225.014	207.068	216.464	143.657	98.9449	111.25	-1.82507	-0.867949	5.47171e-06	0.000238477
LYSMD3	53.0802	50.3892	40.7496	30.2093	12.8539	14.976	-2.44905	-1.29222	5.51686e-06	0.000239096
C11orf96	4.03871	12.2036	8.09213	1.73866	0.597854	1.06971	-6.58307	-2.71876	5.52188e-06	0.000239096
ZC3H11A	129.527	179.118	203.17	96.2784	83.1017	96.6306	-1.85268	-0.88961	5.58768e-06	0.000241159
IL18R1	8.3659	9.44797	8.09213	1.956	0.896781	2.85256	-4.52879	-2.17912	5.71159e-06	0.000243587
ID4	5.19263	9.84163	13.2942	2.60799	1.19571	1.42628	-5.10759	-2.35264	5.69354e-06	0.000243587
APOL2	16.1548	12.5973	11.5602	29.7746	34.0777	25.6731	2.21825	1.14942	5.66696e-06	0.000243587
COL4A6	15.2894	7.87331	10.6932	1.956	4.48391	2.49599	-3.87878	-1.9556	5.71723e-06	0.000243587
HYAL2	31.4442	28.7376	30.3455	52.8119	53.508	69.1747	1.90953	0.933217	5.73924e-06	0.000243744
MEX3C	90.294	88.5747	95.0825	51.7252	49.323	47.4239	-1.83732	-0.877606	6.08461e-06	0.000257588
PHLDA3	82.7936	81.4887	71.3841	140.614	134.218	133.001	1.74116	0.800051	6.61666e-06	0.000278593
NPIPB3	26.5401	30.3122	53.7549	8.25865	19.4303	12.48	-2.77001	-1.46989	6.62269e-06	0.000278593
DEK	160.683	166.914	159.531	113.448	72.9382	75.5929	-1.84767	-0.88571	7.05701e-06	0.000295927
RYBP	62.8885	60.2308	70.8061	39.5546	24.2131	35.657	-1.94154	-0.957202	7.12596e-06	0.000297879
BDP1	80.1972	75.5837	106.354	47.1612	44.2412	47.7804	-1.8902	-0.918541	7.19194e-06	0.000299694
POLD4	23.0783	39.7602	28.6115	48.0305	74.1339	64.1827	2.04658	1.03321	7.41107e-06	0.000307861
INTS6	75.2931	70.8598	80.3433	41.7279	33.7788	46.3542	-1.874	-0.906118	7.45594e-06	0.00030876
SETD2	145.105	135.421	241.897	101.06	80.4114	88.4295	-1.93541	-0.95264	7.48272e-06	0.000308906
MRPL36	8.94286	16.1403	10.9822	23.6893	31.0884	29.2388	2.3626	1.24038	7.5873e-06	0.000312254
UFM1	98.083	96.448	78.8983	59.3319	38.8605	40.2925	-1.95402	-0.966442	7.73798e-06	0.000317472
AKAP9	116.546	89.7557	106.932	66.7212	47.8283	52.4159	-1.86782	-0.901358	7.80332e-06	0.000319168
NDUFS3	22.7899	33.0679	20.5193	44.3359	66.6607	47.7804	2.09454	1.06663	8.35061e-06	0.000340505
CHN1	49.6184	38.1855	36.1256	94.7571	64.2693	83.0809	1.9529	0.965615	8.48174e-06	0.000344795
BCL6	30.8673	52.7512	88.1464	26.5146	21.8217	21.3942	-2.45654	-1.29663	8.53458e-06	0.000344833
XPOT	393.486	407.05	408.364	245.803	213.434	208.237	-1.79863	-0.846895	8.51024e-06	0.000344833
TMEM160	2.59631	6.69231	1.73403	9.99731	15.5442	12.1234	3.55218	1.8287	8.6204e-06	0.000347245
CDC6	44.1373	44.4842	41.3277	21.0813	15.8431	24.6034	-2.11897	-1.08337	8.69877e-06	0.000349344
MYLIP	6.05807	9.84163	13.2942	2.39066	0.896781	2.85256	-4.69529	-2.23122	8.83142e-06	0.000353603
RRAS	49.6184	52.7512	38.1486	75.6318	99.8417	91.9952	1.90496	0.929763	8.86042e-06	0.000353698
ABT1	11.2507	14.5656	7.22512	21.5159	27.5013	25.6731	2.29166	1.19639	8.95144e-06	0.000356262
PKD1	382.812	416.498	581.477	229.069	236.152	267.784	-1.88567	-0.915079	9.01497e-06	0.000357719
NAA38	10.3853	16.1403	9.53715	25.8626	29.2949	26.0296	2.31577	1.21149	9.06221e-06	0.000358524
CLGN	19.9051	15.3529	15.3172	5.43332	8.96781	2.49599	-2.94281	-1.55719	9.26293e-06	0.000365377
ING1	19.6166	26.3756	33.2355	12.8226	11.3592	9.6274	-2.30942	-1.20753	9.75014e-06	0.000383457
OSGIN2	38.0793	25.1946	26.0104	16.0826	10.7614	11.7668	-2.28525	-1.19236	9.92058e-06	0.00038901
MIA3	162.414	155.891	175.137	101.277	96.5535	83.4375	-1.74134	-0.800197	1.00659e-05	0.00039221
OGFRL1	24.2323	35.0362	36.4146	18.4733	8.66889	13.5497	-2.31512	-1.21109	1.00699e-05	0.00039221
SNTB1	16.1548	12.991	18.2073	6.08532	6.5764	4.99199	-2.68509	-1.42497	1.01202e-05	0.00039221
CCDC85B	39.2332	49.6018	39.8826	72.8065	77.1232	88.0729	1.85361	0.890335	1.01152e-05	0.00039221
SYNC	37.2138	31.0996	25.1434	79.7611	49.323	57.4078	2.00313	1.00226	1.02612e-05	0.000396517
ATF2	51.0608	49.9955	50.8648	29.9919	20.0281	26.7428	-1.94869	-0.962507	1.03221e-05	0.000397717
UQCR10	25.6747	32.2806	18.7853	46.5092	54.1058	52.0593	2.01107	1.00797	1.0606e-05	0.000407471
NDUFA6	39.5217	50.3892	34.6806	75.4145	82.5039	70.2444	1.85864	0.894245	1.06985e-05	0.00040984
MFHAS1	25.9631	34.6426	34.6806	14.7786	17.0388	12.48	-2.11968	-1.08385	1.07523e-05	0.000410719
F8A1	12.1161	7.87331	8.09213	23.4719	22.7185	20.6811	2.36174	1.23985	1.08122e-05	0.000411825
ODR4	32.3097	33.8552	26.2994	18.256	11.9571	10.3405	-2.20412	-1.14021	1.0885e-05	0.000412236
GOLGA8B	100.102	83.0634	118.203	56.5065	49.323	58.8341	-1.83888	-0.87883	1.08582e-05	0.000412236
UQCRFS1	38.3677	39.3665	23.9874	62.5918	63.0736	68.105	1.91444	0.936923	1.10458e-05	0.000417136
RPUSD3	17.5972	16.9276	14.4502	36.9466	33.1809	32.4479	2.12129	1.08494	1.11464e-05	0.000419384
AHR	104.718	104.321	130.341	74.3278	52.9101	63.113	-1.77663	-0.829145	1.11684e-05	0.000419384
SPAG9	177.126	175.181	205.193	119.75	97.7492	99.8397	-1.74883	-0.806387	1.14481e-05	0.000428675
CAPG	50.1954	59.8371	44.2177	80.1958	117.777	92.3517	1.88645	0.91567	1.17842e-05	0.000440019
EPHX1	51.3493	59.4435	39.5936	90.6278	90.5749	98.77	1.87551	0.907285	1.22343e-05	0.000455514
GPBP1	84.8129	70.8598	87.2794	52.8119	35.5723	38.8662	-1.89498	-0.922184	1.23019e-05	0.000455514
ABCC4	110.776	81.0951	78.3202	51.2905	43.6434	47.4239	-1.89665	-0.92345	1.22824e-05	0.000455514
EIF4E2	67.5042	75.9774	56.3559	110.405	114.19	121.947	1.74332	0.80184	1.24363e-05	0.000459209
GLIPR2	12.6931	16.1403	16.1843	29.3399	29.2949	33.8742	2.04726	1.03369	1.28057e-05	0.000471541
DGCR6L	15.0009	20.0769	13.5832	33.0346	32.5831	38.153	2.15779	1.10955	1.315e-05	0.000482882
VPS25	28.271	39.7602	25.7214	46.0746	74.4328	66.6787	2.00206	1.00149	1.34139e-05	0.000491216
ACOT13	26.5401	27.9502	19.9413	46.0746	43.3444	54.5553	1.93747	0.954174	1.38466e-05	0.000504508
GRB10	61.1576	66.5294	78.6093	39.1199	31.9852	40.649	-1.84771	-0.885739	1.38528e-05	0.000504508
USF3	42.118	32.6742	45.9517	19.7773	21.2238	17.472	-2.07792	-1.05514	1.39034e-05	0.000504967
ZMYM2	84.8129	83.0634	83.2333	53.8985	37.067	41.3622	-1.87186	-0.904473	1.3974e-05	0.000506148
LIN54	34.329	34.2489	39.3046	20.4293	15.8431	15.6891	-2.0337	-1.0241	1.40868e-05	0.000508848
LRRFIP2	91.7364	100.778	127.74	61.5052	60.0843	58.8341	-1.77491	-0.827745	1.41408e-05	0.000509414
ZCCHC2	12.1161	17.3213	24.5654	5.65065	7.47318	6.77484	-2.73223	-1.45008	1.42823e-05	0.00051312
ZMAT2	45.8682	39.7602	32.6575	66.5038	71.4436	82.7243	1.85415	0.890757	1.43708e-05	0.000514909
PPFIA1	101.256	95.267	139.878	67.3732	56.1983	65.609	-1.78046	-0.83225	1.50216e-05	0.000536779
GK	87.6977	65.7421	60.402	42.1626	34.0777	37.7965	-1.87053	-0.903448	1.51265e-05	0.000539079
LSM4	47.3106	47.6335	42.7727	73.2412	95.3577	84.8638	1.8332	0.874367	1.52782e-05	0.000543029
BOD1L1	146.259	133.059	210.395	94.1051	82.205	94.1346	-1.81321	-0.858544	1.53909e-05	0.000545577
TMF1	132.412	109.439	122.249	79.7611	61.579	69.1747	-1.72383	-0.785614	1.56539e-05	0.000553424
POLA2	13.5585	15.7466	6.3581	20.4293	29.8927	42.7885	2.61249	1.38543	1.58044e-05	0.000557263
GABRR2	4.32719	7.87331	18.7853	1.956	0.896781	2.85256	-5.41858	-2.43792	1.61037e-05	0.000566313
ROCK1	148.278	154.71	188.142	109.536	66.3618	92.7083	-1.82465	-0.867618	1.6195e-05	0.000568021
RAB34	72.4083	95.6607	58.6679	127.574	147.072	129.435	1.79152	0.841182	1.63287e-05	0.000571203
FAM89B	25.9631	31.8869	24.8544	47.8132	52.6112	54.9118	1.88489	0.914483	1.63845e-05	0.000571652
GNL3	126.065	122.43	156.93	71.2852	88.7814	72.3838	-1.74955	-0.806987	1.64627e-05	0.000572875
SLC7A11	499.069	359.023	381.486	263.407	209.249	202.889	-1.83298	-0.874195	1.65735e-05	0.000573467
SENP6	119.43	107.864	117.625	82.8038	43.9423	60.2604	-1.83647	-0.876932	1.65948e-05	0.000573467
MTDH	248.958	220.453	249.411	154.306	122.56	133.714	-1.74592	-0.803985	1.66091e-05	0.000573467
KDM3A	69.812	83.8507	110.689	46.7266	46.6326	47.7804	-1.87484	-0.906765	1.676e-05	0.000577176
ERO1B	9.51982	12.991	10.1152	4.34666	2.09249	1.78285	-3.55733	-1.8308	1.69297e-05	0.000581514
RC3H2	95.1982	88.181	123.983	61.2878	52.9101	54.5553	-1.82046	-0.8643	1.69945e-05	0.000582236
DDX3X	335.79	451.928	538.127	258.191	240.636	208.95	-1.8713	-0.904042	1.71401e-05	0.000585715
EBP	10.6737	16.9276	14.4502	28.2533	44.8391	24.2468	2.33079	1.22082	1.72286e-05	0.000587231
KNOP1	12.9816	9.44797	12.1382	26.5146	21.2238	28.1691	2.1549	1.10762	1.73558e-05	0.000590054
GCLM	131.547	118.493	108.666	73.4585	61.579	74.8798	-1.70801	-0.772315	1.79664e-05	0.000608023
PHIP	113.661	94.4797	117.336	76.5011	49.9208	54.1987	-1.79261	-0.842063	1.79758e-05	0.000608023
SEMA6D	26.2516	26.3756	26.0104	15.8653	7.47318	10.3405	-2.26609	-1.18021	1.80581e-05	0.000609254
ZNF316	45.8682	55.1131	67.3381	27.6013	28.697	32.8045	-1.90129	-0.926979	1.83599e-05	0.00061787
RASGRF2	9.51982	12.5973	14.1612	3.69466	5.08176	3.92227	-2.86	-1.51601	1.89064e-05	0.000634652
NEDD4	172.511	145.656	194.211	116.056	72.3404	95.9174	-1.79955	-0.847636	1.90256e-05	0.000637047
SIAH2	40.3871	51.1765	58.6679	27.3839	26.3056	22.4639	-1.95378	-0.966267	1.92078e-05	0.000639924
CHAC1	21.3475	23.6199	13.8722	8.25865	6.87532	9.27083	-2.38901	-1.25641	1.91834e-05	0.000639924
EIF1	535.418	762.923	791.295	352.079	407.737	363.702	-1.8596	-0.894995	1.95397e-05	0.000649352
HACE1	40.6756	32.2806	30.9235	17.8213	16.441	14.976	-2.09237	-1.06514	1.96198e-05	0.000650389
KDM6A	34.0406	40.1539	57.2229	22.6026	18.8324	19.2548	-2.15554	-1.10805	2.01082e-05	0.00066492
STAG1	105.006	114.95	105.487	71.2852	50.2198	64.8958	-1.73287	-0.793159	2.06309e-05	0.000680512
PAFAH1B3	5.48111	8.66064	7.80312	14.1266	20.327	19.6114	2.449	1.29219	2.09191e-05	0.000688312
WDR47	33.4636	42.1222	56.3559	23.9066	16.441	19.9679	-2.17289	-1.11962	2.10844e-05	0.000692038
RHOC	143.086	236.199	156.062	280.577	421.786	322.696	1.91709	0.93892	2.13245e-05	0.000698195
TMED5	127.508	118.493	98.2616	82.8038	51.1165	55.2684	-1.80799	-0.85439	2.13896e-05	0.000698605
DKK1	17.3088	26.3756	21.0973	72.8065	24.512	63.8261	2.49455	1.31878	2.15958e-05	0.00070361
CCDC93	87.1208	84.638	106.643	54.7679	53.209	48.8501	-1.77302	-0.826205	2.2021e-05	0.000715709
UVRAG	34.6175	29.9186	39.0156	19.1253	14.3485	15.6891	-2.08631	-1.06095	2.27501e-05	0.000737603
gene:ENSG00000271793	14.424	19.6833	2.31204	3.25999	1.49464	1.42628	-5.66111	-2.50109	2.28406e-05	0.000738735
TMEM203	15.5779	20.4706	16.7623	35.6426	32.5831	36.3702	2.00952	1.00685	2.29639e-05	0.000740919
RASAL2	66.6387	65.3484	83.2333	40.2066	41.2519	38.8662	-1.79483	-0.843848	2.30313e-05	0.000741295
DOLK	14.424	16.1403	10.1152	26.7319	35.2734	25.3165	2.17062	1.1181	2.33482e-05	0.00074968
RASSF1	32.5982	54.3258	45.6627	22.3853	17.9356	21.3942	-2.12607	-1.08819	2.4297e-05	0.000778266
NAT14	11.5392	13.3846	9.82616	22.8199	24.512	23.1771	2.05086	1.03623	2.50676e-05	0.00080102
USP1	52.2148	54.7195	52.3098	36.7292	17.9356	22.8205	-2.02813	-1.02015	2.54692e-05	0.000811901
BICD1	37.7908	31.0996	40.7496	20.212	18.2346	19.9679	-1.89441	-0.921748	2.56011e-05	0.000814151
CDK13	97.506	94.8733	119.359	62.1572	57.6929	60.617	-1.73103	-0.791633	2.60631e-05	0.000826866
WDR83OS	26.8286	33.8552	26.8774	51.0732	66.0629	48.137	1.90368	0.928788	2.61286e-05	0.00082697
NDUFB7	14.424	27.9502	13.2942	33.9039	52.3122	41.0056	2.30817	1.20675	2.68558e-05	0.000845959
TOMM22	28.271	46.4525	19.6523	57.8105	72.6393	60.617	2.0392	1.028	2.68451e-05	0.000845959
ULBP1	6.34654	5.90498	8.38113	1.08666	1.49464	2.13942	-4.59135	-2.19892	2.70791e-05	0.000850976
KLF11	14.1355	19.6833	17.0513	4.78132	8.96781	6.41827	-2.55143	-1.35131	2.79959e-05	0.000877712
COX16	10.0968	8.66064	7.51412	22.6026	15.5442	21.7508	2.28795	1.19406	2.84842e-05	0.000890919
ARSI	8.94286	8.66064	6.3581	15.8653	23.9142	16.4022	2.34189	1.22768	2.87594e-05	0.000896943
NNMT	15.2894	22.8326	12.7162	36.9466	27.2024	45.9976	2.18531	1.12784	2.88118e-05	0.000896943
DYNC2H1	85.6784	73.6154	58.3789	48.2479	29.5938	35.3005	-1.90951	-0.933206	2.89498e-05	0.000899133
gene:ENSG00000285130	4.61567	10.629	4.33507	1.08666	1.19571	0	-7.51421	-2.90962	3.00067e-05	0.000929788
TMEM87A	83.3705	88.5747	79.1873	52.5945	44.2412	40.2925	-1.78649	-0.837128	3.08447e-05	0.000951479
MINDY2	40.6756	37.7919	40.7496	21.7333	20.327	18.5417	-1.95029	-0.963692	3.08499e-05	0.000951479
SGK1	45.2913	112.195	97.6836	41.5106	42.7466	34.5873	-2.13974	-1.09743	3.15605e-05	0.000971143
MRPS28	11.5392	10.629	6.93611	19.9946	25.4088	21.0377	2.28082	1.18956	3.17463e-05	0.000974603
SDC3	146.259	135.421	130.919	286.662	170.388	301.659	1.83842	0.878463	3.30499e-05	0.00100828
CAMSAP2	132.7	132.665	155.484	93.6704	76.5253	76.3061	-1.69701	-0.762996	3.30709e-05	0.00100828
BAX	60.8691	86.6064	59.5349	100.408	140.197	122.304	1.75846	0.814316	3.30333e-05	0.00100828
FRMD6	137.316	139.358	157.797	260.799	248.707	232.84	1.71162	0.775363	3.32219e-05	0.00100963
NPIPA5	24.2323	14.172	29.4785	11.3013	5.67962	9.6274	-2.54373	-1.34694	3.32671e-05	0.00100963
NDUFS8	24.5207	42.5159	23.9874	46.9439	74.1339	61.3301	2.01512	1.01087	3.34884e-05	0.00101173
N6AMT1	9.51982	13.7783	7.80312	26.0799	16.7399	27.8125	2.30666	1.20581	3.34254e-05	0.00101173
MFSD5	18.4627	22.4389	17.6293	32.8173	38.5616	39.2227	1.88757	0.916532	3.3672e-05	0.00101497
ZC3H12C	70.1005	49.6018	63.003	30.8613	40.3552	29.5953	-1.82297	-0.866293	3.39071e-05	0.00101975
NFKBIA	97.7945	90.543	78.0312	43.4666	55.8994	50.9896	-1.78289	-0.834217	3.43208e-05	0.00102986
PTGER2	122.315	103.928	99.4176	252.975	139.3	192.548	1.79714	0.845699	3.44694e-05	0.00103199
CAVIN2	7.50046	7.08598	8.38113	23.4719	11.6582	21.0377	2.44184	1.28797	3.48518e-05	0.00103876
WWC1	9.8083	6.69231	15.6062	2.60799	3.2882	3.5657	-3.47606	-1.79745	3.48474e-05	0.00103876
SNAPIN	13.27	16.1403	7.51412	24.5586	28.9959	28.5256	2.25321	1.17198	3.57775e-05	0.00106396
CLK1	51.9263	70.0724	55.4889	36.9466	30.4906	27.8125	-1.82616	-0.868814	3.58909e-05	0.00106495
ZMYM3	48.753	37.7919	46.5297	77.3705	86.6889	79.1586	1.79848	0.846779	3.61245e-05	0.00106949
TENT4A	56.5419	70.8598	97.6836	40.4239	37.3659	42.0753	-1.87956	-0.910396	3.62326e-05	0.00107031
POLR2F	16.7318	22.4389	15.3172	27.3839	49.6219	41.0056	2.16927	1.11721	3.67151e-05	0.00108216
BRPF3	126.642	146.837	191.321	69.7638	112.397	68.8181	-1.85275	-0.889665	3.7028e-05	0.00108897
LSM10	6.9235	22.0453	9.53715	26.0799	33.1809	34.5873	2.46761	1.30312	3.71839e-05	0.00109114
BMP2K	35.7714	30.3122	31.7905	16.952	14.3485	17.1154	-2.02676	-1.01917	3.75166e-05	0.00109606
RICTOR	72.9853	78.7331	84.9674	46.7266	46.9316	39.2227	-1.7621	-0.817293	3.74893e-05	0.00109606
IRF1	26.2516	24.4073	18.2073	10.432	11.6582	9.98397	-2.13106	-1.09157	3.81844e-05	0.00111313
ZC3H7A	104.141	93.6924	110.978	70.6332	45.4369	55.625	-1.78933	-0.839422	3.83388e-05	0.00111518
ARHGAP5	78.7549	78.3394	77.7422	58.0279	27.5013	32.4479	-1.97407	-0.981172	3.85e-05	0.00111742
MANBA	72.4083	79.1267	91.9035	43.9012	42.4476	49.9199	-1.79867	-0.846927	3.86252e-05	0.00111862
MFAP2	3.17327	13.7783	4.33507	30.2093	10.7614	31.3782	3.43833	1.78171	3.8714e-05	0.00111875
BRMS1	25.6747	33.0679	27.1664	49.5519	65.1661	47.4239	1.90184	0.927397	3.89614e-05	0.00112346
PSMC3IP	15.0009	18.8959	26.0104	10.432	5.08176	8.91426	-2.42353	-1.27711	3.91995e-05	0.00112788
HAUS6	67.5042	59.0498	69.6501	45.2052	21.5228	33.8742	-1.93945	-0.955648	3.93568e-05	0.00112996
NDUFB10	42.4065	62.5928	38.1486	69.5465	109.706	95.5609	1.92528	0.945072	3.99819e-05	0.00114543
ZNF131	26.5401	35.0362	34.6806	16.5173	17.6367	11.4103	-2.06223	-1.0442	4.02424e-05	0.00114549
LUC7L2	72.9853	58.6561	99.9956	47.3786	36.4691	39.9359	-1.87052	-0.903439	4.01451e-05	0.00114549
SERPINB7	8.65438	7.08598	10.4042	16.952	40.6541	14.976	2.75419	1.46163	4.01634e-05	0.00114549
TMSB4X	349.06	586.561	353.453	736.758	915.315	776.967	1.88576	0.915144	4.03424e-05	0.00114588
QKI	97.7945	108.258	137.277	75.8491	60.0843	63.4695	-1.7159	-0.778962	4.04718e-05	0.0011471
MOSMO	28.5595	21.2579	27.4554	14.1266	12.5549	9.98397	-2.08299	-1.05866	4.07724e-05	0.00115316
ANKRD10	59.4267	79.1267	77.1642	41.2932	39.1595	41.0056	-1.76499	-0.819663	4.16935e-05	0.00117671
MTSS1	6.63502	7.08598	8.38113	1.52133	2.39142	1.42628	-4.11709	-2.04163	4.19413e-05	0.0011812
SNRPC	36.3484	55.5068	34.3915	70.8505	86.091	72.3838	1.83275	0.874006	4.23333e-05	0.00118972
SPEN	141.066	152.348	288.138	87.8025	115.087	100.553	-1.91847	-0.939954	4.25425e-05	0.00119308
PDE8A	64.9078	69.2851	84.1003	46.5092	35.8713	38.8662	-1.78759	-0.838017	4.35009e-05	0.00121738
SGTB	38.0793	35.4299	39.8826	23.6893	14.3485	19.2548	-1.94764	-0.961728	4.37243e-05	0.00122106
MGLL	181.742	218.484	367.614	116.056	152.453	133.357	-1.9121	-0.935161	4.38588e-05	0.00122226
TASOR2	120.007	107.471	150.86	83.2385	66.0629	73.8101	-1.69494	-0.761237	4.55323e-05	0.00126624
MAFB	4.03871	5.90498	9.53715	0.434666	2.09249	0.713141	-6.06589	-2.60072	4.60825e-05	0.00127886
ATL2	45.0028	44.0905	44.5067	27.6013	20.0281	20.3245	-1.9124	-0.935386	4.64888e-05	0.00128629
PRDM1	19.6166	25.5882	37.2816	10.8666	14.6474	10.6971	-2.28095	-1.18963	4.67692e-05	0.00128629
ACTB	2106.76	2280.9	2220.13	3596.42	4127.29	3881.27	1.75627	0.812513	4.66013e-05	0.00128629
DDB2	66.6387	46.4525	43.6397	83.4558	116.88	88.786	1.83817	0.878273	4.6768e-05	0.00128629
RBM14	42.4065	37.7919	36.4146	67.5905	69.65	65.2524	1.73417	0.794246	4.6834e-05	0.00128629
USP38	44.1373	40.1539	45.3737	25.4279	22.4195	21.0377	-1.86378	-0.898232	4.71053e-05	0.00129107
SLC2A3	47.0221	64.9548	66.7601	27.3839	37.3659	32.8045	-1.83802	-0.878151	4.76187e-05	0.00130246
RIOK3	57.6959	62.5928	63.292	39.9892	33.1809	29.2388	-1.74624	-0.804248	4.7721e-05	0.00130258
KMT2A	188.665	165.733	264.439	115.404	129.137	112.676	-1.73466	-0.794652	4.82071e-05	0.00131315
ZNF688	4.61567	4.72398	5.20208	11.9533	13.4517	16.0457	2.76564	1.46761	4.91439e-05	0.00133593
NDUFA11	26.5401	41.3349	23.1204	57.1585	66.9597	48.137	1.91461	0.93705	4.93745e-05	0.00133946
ZNF451	69.235	57.0815	61.847	42.5972	26.9034	33.5176	-1.812	-0.857584	4.99278e-05	0.00135171
SPTY2D1	58.2728	49.2082	72.8292	37.5986	34.3766	21.7508	-1.91055	-0.933989	5.02933e-05	0.00135884
LRPPRC	183.473	158.647	171.669	121.054	92.6674	88.786	-1.68925	-0.756386	5.12134e-05	0.0013781
UMPS	14.7124	11.81	11.2712	28.9053	25.1099	23.8902	2.07812	1.05528	5.1133e-05	0.0013781
DCTN3	16.7318	38.1855	15.6062	45.8572	57.6929	48.4936	2.17594	1.12164	5.14006e-05	0.00138034
SORT1	51.9263	74.4027	93.0595	131.486	123.756	127.652	1.74592	0.803986	5.22625e-05	0.00140066
SLC16A1	73.8507	94.086	110.978	59.7665	45.7358	45.9976	-1.82984	-0.871721	5.25104e-05	0.00140322
EPAS1	116.546	112.195	140.167	76.7185	65.764	80.2283	-1.66203	-0.732947	5.25694e-05	0.00140322
ABCA1	235.688	170.457	141.612	93.8878	20.9249	94.8477	-2.61143	-1.38484	5.33256e-05	0.00142055
S100A6	273.767	611.756	221.089	671.993	1176.58	787.664	2.3832	1.2529	5.59337e-05	0.001486
EZH2	32.0212	38.9729	52.0208	20.8639	16.7399	22.4639	-2.05129	-1.03653	5.60059e-05	0.001486
OVCA2	12.6931	14.172	10.1152	23.2546	24.512	29.9519	2.08954	1.06318	5.67494e-05	0.00150273
MRPL57	13.847	13.7783	7.80312	24.1239	23.6152	24.2468	2.06087	1.04325	5.71485e-05	0.00151029
GUK1	62.6	94.8733	57.8009	105.624	147.67	124.8	1.76216	0.817348	5.76013e-05	0.0015182
NDUFA13	30.0018	57.0815	28.9005	63.8958	93.2653	72.7404	1.99319	0.995079	5.76762e-05	0.0015182
GABBR2	69.235	78.7331	169.068	44.5532	59.7854	44.5713	-2.1305	-1.09119	5.85593e-05	0.0015384
NEDD8	61.4461	103.14	56.6449	117.36	161.72	123.017	1.82392	0.867046	5.8921e-05	0.00154485
PPP1CA	77.3125	87.3937	49.7088	106.493	162.317	118.025	1.80704	0.853628	5.99519e-05	0.00156878
C14orf119	49.6184	50.3892	32.9465	85.8465	76.2264	78.8021	1.82501	0.867908	6.16113e-05	0.00160903
TTC4	23.6553	16.9276	13.8722	35.6426	40.953	32.0913	1.98978	0.992611	6.34913e-05	0.00165488
UBL5	23.0783	51.5702	18.4963	58.2452	81.906	61.6867	2.17962	1.12408	6.36542e-05	0.00165588
ATP2A2	418.583	500.349	630.03	289.27	308.493	273.846	-1.77689	-0.829351	6.41015e-05	0.00166426
HID1	5.48111	6.29865	3.46806	0.651998	0.597854	0.713141	-7.26697	-2.86135	6.67833e-05	0.00173051
NPIPB4	13.27	11.4163	18.7853	5.21599	7.17425	2.85256	-2.81489	-1.49308	6.90626e-05	0.00178609
ADAMTS1	171.068	218.878	355.187	123.88	157.535	112.676	-1.89077	-0.918971	6.96224e-05	0.00179707
TGFB2	8.94286	12.5973	18.4963	5.43332	0.597854	5.34856	-3.48013	-1.79914	7.09303e-05	0.00182609
ATP5MC3	65.1963	92.5114	49.1308	105.624	141.691	119.095	1.77743	0.829792	7.12961e-05	0.00182609
NSD3	140.778	159.828	170.802	104.32	86.091	91.9952	-1.65953	-0.730772	7.11426e-05	0.00182609
RPGR	10.3853	16.9276	18.4963	5.65065	7.17425	3.20913	-2.78441	-1.47737	7.12109e-05	0.00182609
OSBPL6	28.8479	27.5566	47.1078	13.692	13.7506	20.6811	-2.17937	-1.12391	7.24804e-05	0.00184793
MRPS18A	12.9816	11.0226	9.82616	22.6026	24.512	21.7508	2.02956	1.02117	7.24014e-05	0.00184793
POSTN	370.407	386.186	424.259	853.031	580.218	652.88	1.76762	0.821804	7.25661e-05	0.00184793
SYVN1	92.3134	119.281	130.919	62.5918	74.1339	67.0352	-1.68224	-0.750382	7.27996e-05	0.00185034
MRGPRF	27.1171	16.5339	20.5193	43.9012	37.067	49.5633	2.00123	1.00089	7.36649e-05	0.00186875
TARS2	18.4627	14.5656	14.4502	29.3399	32.882	31.7348	1.94798	0.96198	7.42977e-05	0.00188122
SFPQ	259.631	366.109	454.604	191.905	211.341	204.671	-1.77739	-0.829758	7.51665e-05	0.0018996
SAT1	84.5244	129.122	108.955	56.0719	77.4221	47.4239	-1.7776	-0.829933	7.59703e-05	0.00191627
FNDC3A	143.951	147.231	158.664	100.625	84.2974	84.8638	-1.6517	-0.723951	7.64814e-05	0.00192187
RPS6KA3	113.372	87.7874	74.2742	62.1572	43.9423	42.0753	-1.84797	-0.885939	7.64422e-05	0.00192187
LSM2	11.8277	23.2263	7.51412	29.1226	36.1702	30.3085	2.27593	1.18646	7.75671e-05	0.00194547
SMCHD1	169.626	157.86	152.016	118.664	55.8994	88.786	-1.81631	-0.861009	7.80297e-05	0.00195339
NDUFS6	20.1936	35.8235	18.2073	39.7719	57.0951	49.9199	1.99366	0.99542	7.81834e-05	0.00195356
MIA2	44.4258	33.0679	28.9005	18.908	20.0281	15.3325	-1.95009	-0.963543	7.83483e-05	0.001954
gene:ENSG00000256861	1.15392	0	0	9.12798	3.2882	3.20913	11.8553	3.56746	7.93906e-05	0.00197629
SMARCAL1	28.271	26.7692	25.7214	47.1612	48.4262	48.8501	1.78171	0.83326	7.9764e-05	0.00198187
TTC17	160.394	144.475	184.096	97.7998	100.141	101.979	-1.63987	-0.713585	7.99171e-05	0.00198197
MEF2D	107.603	134.634	169.068	79.3265	92.3685	66.6787	-1.72302	-0.784942	8.00692e-05	0.00198205
METTL13	26.8286	17.7149	17.6293	42.1626	40.953	39.2227	1.94983	0.963348	8.06457e-05	0.00199261
CTH	11.5392	14.172	9.53715	4.78132	4.78283	2.85256	-2.67917	-1.42179	8.14899e-05	0.00200973
ARL13B	16.1548	13.7783	13.5832	6.95465	3.88605	5.70513	-2.56003	-1.35616	8.20277e-05	0.00201925
B3GALNT2	30.5788	26.7692	30.9235	18.0386	14.0496	12.8365	-1.92205	-0.942647	8.24762e-05	0.00202654
EIF3A	566.862	540.109	827.709	381.854	317.461	381.887	-1.78988	-0.839862	8.28347e-05	0.00203159
OSBP	169.914	165.339	194.789	99.1038	118.674	107.684	-1.63826	-0.712161	8.43375e-05	0.00206464
RRAGC	77.3125	79.5204	78.6093	55.4199	36.768	39.2227	-1.76789	-0.822029	8.45432e-05	0.00206587
PUS7	15.2894	21.6516	22.2534	9.12798	8.36996	9.98397	-2.14136	-1.09853	8.50012e-05	0.00206996
ANKRD11	378.196	339.34	587.835	214.29	261.86	243.181	-1.81627	-0.860978	8.50219e-05	0.00206996
CALM3	195.877	178.724	156.64	289.487	271.127	337.672	1.68878	0.755986	8.55692e-05	0.00207947
AXL	212.321	187.778	248.255	346.646	422.982	335.533	1.70154	0.766839	8.66751e-05	0.0021025
PPAT	20.482	24.8009	25.1434	14.7786	8.07103	9.27083	-2.11618	-1.08146	8.74982e-05	0.0021186
SLC4A7	49.6184	44.0905	54.9109	29.5573	27.8002	27.8125	-1.75116	-0.80831	8.82421e-05	0.00212886
ANO4	42.4065	49.2082	66.7601	33.2519	26.6045	23.1771	-1.89143	-0.919476	8.81892e-05	0.00212886
SRSF11	158.664	166.52	225.424	115.404	106.717	108.041	-1.66778	-0.737927	8.87461e-05	0.00213714
DST	1103.14	965.661	1562.07	699.812	650.465	692.816	-1.77753	-0.829873	8.90672e-05	0.002141
RETREG3	36.6369	39.3665	31.5015	59.3319	63.3725	58.8341	1.70174	0.767011	8.92951e-05	0.0021426
TMEM54	6.9235	9.0543	6.64711	16.7346	20.9249	13.1931	2.30078	1.20212	8.97587e-05	0.0021428
INTS5	16.1548	15.3529	15.0282	27.6013	37.3659	26.0296	1.94978	0.96331	8.97869e-05	0.0021428
DIS3	94.9097	76.7647	84.6784	58.0279	36.1702	49.5633	-1.77714	-0.829557	8.96677e-05	0.0021428
IPO7	332.905	293.281	311.547	225.591	137.208	175.076	-1.74044	-0.799456	9.03148e-05	0.00215153
IBTK	128.373	109.833	96.2385	84.5425	45.138	57.7644	-1.77622	-0.828811	9.08054e-05	0.00215935
HPS6	13.847	14.9593	7.80312	20.4293	26.6045	34.9439	2.23654	1.16127	9.15372e-05	0.00217286
RABGGTB	47.3106	51.5702	50.2868	33.0346	18.2346	27.0994	-1.88161	-0.911969	9.19385e-05	0.0021785
LRRC17	51.6378	43.3032	24.2764	84.5425	72.9382	69.1747	1.90593	0.930496	9.41669e-05	0.00222733
TSPAN17	40.3871	42.1222	35.2586	56.2892	78.02	71.3141	1.74003	0.799113	9.62108e-05	0.00226806
SNRPD2	55.388	101.959	49.7088	101.929	159.627	127.296	1.88294	0.91299	9.62302e-05	0.00226806
TMEM119	13.27	24.4073	15.3172	31.5133	38.8605	34.5873	2.01489	1.0107	9.82579e-05	0.00230836
BTG3	38.6562	47.6335	47.3968	23.9066	19.4303	27.4559	-1.88859	-0.917311	9.82874e-05	0.00230836
CEP170	165.01	162.19	221.956	119.098	95.6567	114.103	-1.6704	-0.740195	9.85346e-05	0.00231009
TINCR	1.73088	5.51131	9.53715	0.869331	0.597854	0.35657	-8.37138	-3.06547	9.89543e-05	0.00231584
E2F7	74.7161	73.2218	84.3893	32.3826	59.4865	34.2308	-1.8461	-0.884479	9.9785e-05	0.00233118
ECH1	38.9447	48.0272	35.2586	62.1572	75.3296	72.3838	1.725	0.7866	0.000104146	0.0024288
LPP	162.991	166.127	217.62	127.574	99.8417	98.4134	-1.67353	-0.742891	0.000104339	0.00242902
MRPL16	17.5972	14.9593	12.7162	29.1226	27.5013	29.9519	1.90681	0.931162	0.000104521	0.00242902
PPP3R1	77.024	86.2127	85.8344	56.0719	38.8605	47.4239	-1.73084	-0.791468	0.000105249	0.00244167
JUNB	59.7152	87.7874	72.8292	41.5106	39.7573	44.9279	-1.73778	-0.797248	0.000106328	0.0024624
MZT2B	36.0599	80.3077	39.5936	87.3678	110.902	105.188	1.95387	0.966336	0.00010712	0.00247214
DNAJC10	255.016	249.584	207.794	178.865	102.532	126.583	-1.74138	-0.80023	0.000107064	0.00247214
AFDN	111.353	102.353	148.837	65.1998	86.6889	63.113	-1.68936	-0.756481	0.000107638	0.00247978
HIPK3	53.0802	48.0272	66.7601	36.7292	24.512	31.3782	-1.80635	-0.853078	0.000107878	0.00248102
RAPGEF6	26.2516	24.0136	31.2125	13.4746	14.0496	14.2628	-1.97694	-0.983268	0.000108935	0.00250099
PLAU	90.294	129.91	89.0134	52.8119	68.1554	56.3381	-1.73921	-0.798428	0.000110052	0.00252227
ARF5	31.1558	50.7828	26.2994	60.2012	65.465	73.0969	1.84969	0.887283	0.00011038	0.00252544
ZNF432	23.6553	20.8643	21.3863	13.04	7.17425	9.6274	-2.13672	-1.0954	0.000111353	0.00254333
GPCPD1	42.6949	37.7919	35.5476	21.9506	18.2346	21.3942	-1.87639	-0.90796	0.000111837	0.00255
CSPG5	2.01936	6.69231	7.51412	0.651998	1.19571	0	-7.96474	-2.99363	0.000112214	0.00255422
MED11	5.48111	5.90498	3.46806	13.9093	17.6367	9.27083	2.80034	1.4856	0.000112417	0.00255446
SMC4	222.129	186.204	220.8	166.477	76.5253	101.979	-1.8199	-0.863858	0.000113342	0.00256234
RALA	97.7945	91.724	101.441	57.3759	68.1554	44.2147	-1.70707	-0.77152	0.000113295	0.00256234
SLC39A3	9.51982	12.991	8.95914	20.8639	20.9249	22.8205	2.08364	1.0591	0.00011298	0.00256234
TMEM179B	11.8277	20.0769	7.51412	22.1679	36.1702	30.3085	2.27091	1.18327	0.000114603	0.00258646
gene:ENSG00000262526	0	28.3439	0	0	0.298927	0	-69.8692	-6.12659	0.000115095	0.00259315
NR3C1	132.124	152.348	178.027	103.233	78.3189	95.5609	-1.66574	-0.736163	0.000115311	0.00259362
COL1A1	9962.92	10643.5	13677.7	22897.7	14914.4	25602.5	1.84966	0.887258	0.000115996	0.00260023
RBBP8	34.6175	29.5249	39.5936	21.0813	16.441	16.0457	-1.91471	-0.937128	0.000115844	0.00260023
ZNF667	12.4046	15.7466	16.7623	6.73732	5.38069	5.70513	-2.45592	-1.29626	0.000116604	0.00260945
EVA1A	7.21198	10.629	8.38113	18.6906	14.9464	21.7508	2.13629	1.09511	0.000117086	0.00261584
POP4	21.9244	14.5656	13.5832	31.7306	36.768	33.161	2.00038	1.00028	0.000118461	0.00264212
CAT	56.2535	36.6109	35.2586	73.8932	69.3511	84.8638	1.7693	0.823176	0.000118992	0.00264509
UBC	2304.37	2338.37	2943.8	1325.73	1610.92	1460.87	-1.72566	-0.787152	0.000118847	0.00264509
CCNP	3.17327	3.54299	4.62407	0	0.597854	0	-17.1849	-4.10307	0.000119621	0.00265462
CUL3	126.354	113.376	122.827	88.8891	64.5683	67.3918	-1.62998	-0.704855	0.000119897	0.00265631
FGF18	4.03871	5.90498	10.4042	1.956	0	1.78285	-5.22661	-2.38588	0.000120686	0.00266535
GPM6B	47.5991	35.0362	46.8187	23.9066	24.512	22.4639	-1.84658	-0.884856	0.000120706	0.00266535
PDS5A	173.953	178.33	206.927	129.748	107.016	107.684	-1.61635	-0.692735	0.000121335	0.00267481
NFKB1	62.0231	71.2534	87.2794	42.1626	40.3552	45.641	-1.72643	-0.787794	0.000121763	0.0026798
PSMB3	36.0599	72.8281	36.9926	84.1078	110.304	87.3598	1.94147	0.957147	0.00012283	0.0026988
DENND2B	46.4452	44.0905	45.3737	69.7638	75.0307	89.4992	1.70085	0.766254	0.000123353	0.00270584
ME2	53.0802	62.1991	52.3098	31.0786	30.7895	36.7268	-1.7015	-0.76681	0.000124928	0.00273587
PTMS	139.336	178.724	204.326	287.314	276.508	319.131	1.68976	0.756821	0.000125384	0.00274132
ADAP1	4.90415	10.629	7.80312	1.52133	1.19571	3.20913	-3.991	-1.99675	0.000126096	0.00275238
FAM110B	13.27	12.991	11.5602	5.43332	4.48391	4.99199	-2.49223	-1.31743	0.000126379	0.00275402
DNAJC1	47.8876	53.9322	50.5758	30.4266	27.2024	29.9519	-1.72444	-0.786127	0.000129173	0.00281032
PCDHGC3	72.9853	60.6245	67.6271	94.3224	139.001	102.336	1.66119	0.732215	0.000130292	0.00282926
COX6A1	45.0028	102.747	53.4659	107.58	144.083	124.087	1.87336	0.905625	0.000130516	0.00282926
NPIPA2	12.6931	19.6833	16.7623	7.38932	8.66889	2.13942	-2.61597	-1.38735	0.000130683	0.00282926
AP1AR	17.5972	22.4389	17.6293	6.95465	12.8539	6.0617	-2.21235	-1.14558	0.000131488	0.00284206
DNAJA1	299.153	376.738	436.108	237.979	191.612	227.135	-1.69216	-0.758866	0.00013277	0.00285606
GOLGA8A	216.071	192.502	382.064	144.526	146.474	145.124	-1.81405	-0.859213	0.000132495	0.00285606
CNN1	2.30783	3.14932	1.73403	8.04131	6.5764	9.6274	3.40435	1.76738	0.00013278	0.00285606
RORA	5.48111	4.72398	4.04606	0.651998	0.597854	1.06971	-6.12904	-2.61566	0.000133547	0.00286791
AKNA	40.3871	39.7602	43.6397	21.5159	23.6152	22.1074	-1.85209	-0.889155	0.000133971	0.00287239
HSD17B10	12.1161	18.5023	8.67014	24.3413	27.2024	29.5953	2.10226	1.07194	0.000137427	0.00294172
PCM1	180.011	151.561	192.766	121.054	81.0092	111.963	-1.6693	-0.739244	0.000137669	0.00294218
AK1	29.4249	27.5566	18.4963	35.8599	64.8672	48.137	1.96951	0.977834	0.00013908	0.00295333
AMH	2.59631	5.11765	4.04606	0	0.597854	0	-17.1915	-4.10363	0.000138569	0.00295333
NOSIP	18.7512	23.2263	16.4733	34.3386	47.8283	31.3782	1.96048	0.97121	0.000138996	0.00295333
MAGT1	106.449	120.462	113.001	77.1531	62.4758	68.4615	-1.61062	-0.687616	0.000138675	0.00295333
MAP4K5	96.6406	98.81	106.643	74.1105	42.4476	54.9118	-1.75135	-0.808469	0.000139979	0.00296769
ATXN2	81.6396	89.7557	112.712	57.5932	52.9101	58.121	-1.68679	-0.75428	0.000140681	0.00297782
MXRA8	276.363	261.787	244.209	405.76	444.505	454.627	1.66364	0.734343	0.000141735	0.0029906
EIF5B	174.818	154.71	233.227	124.097	97.7492	117.312	-1.66028	-0.731425	0.000141693	0.0029906
RNF26	41.8295	51.5702	48.2638	83.0211	68.1554	93.778	1.7323	0.792686	0.000142379	0.00299468
POU2F2	4.03871	9.84163	16.1843	2.17333	3.88605	1.06971	-4.13103	-2.0465	0.000142303	0.00299468
CHORDC1	66.0618	45.6652	58.9569	35.4252	29.8927	33.8742	-1.72911	-0.790029	0.000143003	0.00299561
THYN1	16.7318	19.2896	9.53715	25.4279	31.6863	33.5176	2.0002	1.00014	0.000142866	0.00299561
KMT2B	79.9088	94.8733	149.704	54.3332	68.1554	61.6867	-1.76521	-0.819837	0.000143099	0.00299561
YES1	71.5429	57.0815	64.159	45.2052	31.0884	34.2308	-1.72989	-0.790681	0.00014361	0.00300158
ZDHHC16	33.7521	41.3349	33.2355	54.1159	64.2693	65.609	1.69854	0.764296	0.000145546	0.00303251
NUFIP2	159.241	148.805	188.142	125.184	76.5253	90.9255	-1.69073	-0.757644	0.000145523	0.00303251
USF1	15.5779	20.8643	11.8492	26.5146	39.4584	31.3782	2.03338	1.02388	0.000147018	0.00305838
PDCD6-AHRR	0	56.2941	8.38113	0	0	0	-577.236	-9.17302	0.000149392	0.00310291
C19orf53	31.1558	40.5475	24.5654	52.1599	65.465	51.7027	1.77581	0.828477	0.000151075	0.00313298
PSG4	6.9235	6.29865	8.67014	14.344	22.1206	14.6194	2.29282	1.19712	0.00015418	0.00319239
FRMPD4	19.9051	12.991	29.4785	8.91064	8.66889	10.3405	-2.26216	-1.1777	0.000155828	0.00322149
MACO1	51.0608	55.5068	63.292	31.9479	32.2841	37.4399	-1.69045	-0.757407	0.000157478	0.00324049
RAB5A	99.2369	106.29	89.8804	70.6332	50.8176	50.2764	-1.69972	-0.765298	0.000157267	0.00324049
RBX1	17.0203	26.7692	16.4733	32.8173	42.4476	41.0056	1.95001	0.963483	0.000157016	0.00324049
ELOB	29.7134	67.7104	31.2125	67.8078	104.624	87.3598	2.02771	1.01985	0.000157858	0.00324329
RFX8	6.63502	6.69231	10.6932	1.73866	3.2882	2.13942	-3.43651	-1.78094	0.000159064	0.00325297
ZBTB20	29.7134	23.2263	34.6806	17.3866	15.5442	10.3405	-1.99788	-0.998472	0.000158583	0.00325297
EP300	204.82	231.869	391.89	140.397	168.595	155.821	-1.78391	-0.83504	0.000159012	0.00325297
ZZZ3	81.9281	78.3394	89.8804	55.4199	43.9423	48.4936	-1.67875	-0.74739	0.000159813	0.00326328
OSMR	183.184	182.267	208.083	130.182	106.119	122.66	-1.59518	-0.673716	0.000160549	0.00327327
FEM1C	43.2719	43.3032	54.0439	33.0346	17.9356	22.1074	-1.90256	-0.927939	0.000160979	0.00327702
MAP2K1	89.1401	112.982	121.96	60.2012	76.2264	61.6867	-1.63595	-0.710127	0.000162726	0.00330753
PRDX1	343.002	389.729	289.583	540.072	638.508	551.971	1.69487	0.761171	0.000163113	0.00331032
EVA1B	29.4249	43.3032	21.6753	50.6385	72.9382	52.7724	1.88027	0.910939	0.000163813	0.00331692
TTC39B	17.0203	14.5656	15.0282	5.86799	5.38069	9.98397	-2.2925	-1.19692	0.000163937	0.00331692
SLC35B2	72.6968	71.6471	64.737	103.45	124.354	108.397	1.60524	0.682789	0.000164963	0.00333261
TRIM33	53.9456	53.9322	62.714	36.2946	33.7788	30.6651	-1.67927	-0.747833	0.000165419	0.00333675
MED13L	135.008	155.104	221.956	108.666	94.461	101.979	-1.67812	-0.746843	0.000166062	0.00334463
PCNX1	124.335	129.91	178.894	103.016	65.1661	85.5769	-1.70419	-0.769088	0.000166518	0.00334876
AMIGO2	17.8857	33.0679	30.3455	49.9865	45.7358	53.129	1.84404	0.882872	0.000170573	0.00342512
HIVEP3	12.1161	23.6199	56.6449	10.8666	11.6582	10.6971	-2.77816	-1.47413	0.000173138	0.00346615
LSM3	19.0396	23.6199	16.1843	39.7719	34.3766	31.3782	1.85035	0.887799	0.00017305	0.00346615
KLHL5	153.471	148.018	156.93	111.709	72.6393	93.0649	-1.64637	-0.719289	0.000174845	0.00349505
GPT2	43.5604	48.0272	49.9978	22.6026	31.3873	27.8125	-1.75851	-0.814354	0.000175465	0.00350219
GADD45GIP1	32.8866	48.4208	23.9874	52.8119	78.6178	64.1827	1.86692	0.900658	0.000177635	0.00354019
JAGN1	30.0018	35.4299	19.0743	48.0305	55.3015	49.9199	1.82912	0.871148	0.000179247	0.00355484
SPOCK1	49.9069	52.7512	38.1486	80.4131	82.8028	75.5929	1.71733	0.780167	0.000179255	0.00355484
FUBP3	96.929	86.2127	128.318	59.7665	67.5575	60.9735	-1.66067	-0.731769	0.00017933	0.00355484
TRPM7	92.8903	88.9684	82.9443	65.4172	35.2734	46.3542	-1.78855	-0.838791	0.00017944	0.00355484
SDF2	19.6166	28.7376	15.6062	41.7279	47.2305	34.5873	1.96379	0.973641	0.000180672	0.00357391
ZBTB45	11.5392	8.66064	12.7162	21.5159	22.1206	22.8205	1.96757	0.976415	0.000184323	0.00364072
RASA2	28.8479	27.1629	31.7905	19.1253	10.7614	14.976	-1.92283	-0.943229	0.000184942	0.00364752
NIPBL	126.354	114.163	141.323	97.1478	46.3337	74.1666	-1.75054	-0.807797	0.000185223	0.00364766
ADAM19	18.4627	30.3122	36.4146	44.5532	64.8672	54.1987	1.9187	0.940126	0.000189675	0.0037245
ZCCHC7	33.4636	35.0362	34.9696	19.1253	17.9356	21.3942	-1.77794	-0.830207	0.000189965	0.0037245
CHTF8	80.1972	72.0408	60.98	109.536	117.478	114.459	1.59884	0.677026	0.000189736	0.0037245
PID1	33.1751	37.3982	31.5015	20.212	12.256	18.8982	-1.95032	-0.963709	0.000195762	0.0038325
NDUFA4	44.1373	70.4661	36.1256	92.8011	84.5964	91.6386	1.79745	0.845948	0.000196151	0.00383447
PBX1	62.6	52.3575	50.8648	96.2784	88.1835	87.3598	1.64247	0.715865	0.000197089	0.00384714
ERF	64.9078	88.5747	108.666	45.2052	60.9811	38.8662	-1.80471	-0.85177	0.00019799	0.00385906
KDSR	85.9668	70.8598	60.691	43.4666	48.7251	32.8045	-1.73168	-0.79217	0.000198392	0.00386124
NAA16	27.4055	22.8326	32.0795	17.604	9.56567	12.48	-2.04706	-1.03355	0.000200134	0.00388945
RTKN	16.7318	15.7466	13.2942	24.1239	30.4906	32.8045	1.87737	0.908716	0.000203509	0.00394142
HSPD1	467.336	448.778	507.203	302.31	264.55	289.892	-1.66081	-0.731885	0.000203556	0.00394142
DNASE2	17.3088	17.7149	16.4733	27.6013	40.0562	32.0913	1.92295	0.943324	0.000203994	0.00394142
ESF1	19.6166	16.1403	21.9644	10.432	7.7721	10.3405	-2.03473	-1.02483	0.000203707	0.00394142
ACAT2	27.4055	34.6426	20.8083	42.3799	70.8457	44.5713	1.91259	0.93553	0.000205617	0.0039498
ZNF703	55.0995	56.2941	89.3024	29.1226	49.024	28.1691	-1.89047	-0.918747	0.000205517	0.0039498
MBNL2	89.7171	90.9367	88.7244	69.7638	34.3766	40.649	-1.84727	-0.885393	0.000204739	0.0039498
PITPNC1	34.329	29.9186	34.9696	13.9093	22.7185	14.6194	-1.95894	-0.970073	0.000205093	0.0039498
ARHGEF40	140.201	138.57	131.786	219.506	201.477	236.406	1.5986	0.676807	0.00020759	0.00398194
TXNIP	100.102	63.3801	48.8418	170.824	82.5039	162.24	1.95614	0.968011	0.000209448	0.0040118
FAM13B	40.6756	46.8462	42.1947	28.0359	12.256	23.1771	-2.02567	-1.0184	0.000210437	0.00402494
TCEA1	137.028	137.783	122.538	93.6704	86.091	64.1827	-1.61471	-0.691277	0.000212933	0.004061
RPS26	61.1576	135.421	63.292	132.573	208.651	160.1	1.93309	0.950912	0.000212809	0.004061
DPYSL2	95.4867	81.8824	77.7422	134.094	137.805	133.714	1.58468	0.664189	0.000213586	0.00406763
ATAD2	62.0231	44.4842	74.8522	40.4239	24.2131	34.9439	-1.8205	-0.864333	0.00021511	0.00409078
HMGN3	14.1355	12.2036	15.0282	24.3413	28.3981	28.8822	1.92242	0.942923	0.00021657	0.00411266
XYLT2	43.5604	21.2579	28.0334	50.6385	72.6393	52.0593	1.87496	0.90686	0.000216987	0.0041147
POU2F1	17.8857	20.0769	25.4324	10.432	11.0603	9.6274	-2.03382	-1.02419	0.000224468	0.0042505
FTL	3635.13	4359.45	3080.79	5456.57	7379.31	6283.13	1.72637	0.787741	0.000225063	0.00425572
PRELID1	85.1014	115.738	80.6323	132.138	173.378	157.248	1.64851	0.72116	0.000225513	0.00425816
LIF	23.0783	31.0996	19.9413	15.648	6.27747	12.48	-2.11923	-1.08354	0.000226775	0.00427592
ITGB3	44.1373	65.7421	73.1182	89.9758	153.35	85.5769	1.79795	0.846351	0.000230407	0.00433825
ZNF37A	50.7724	51.1765	51.1538	35.4252	21.8217	28.8822	-1.75326	-0.810041	0.000230964	0.00434151
GTF2H1	68.3696	60.6245	65.315	43.0319	29.8927	42.4319	-1.68241	-0.750525	0.000231234	0.00434151
GCLC	391.755	263.756	220.8	141.484	212.836	134.07	-1.79456	-0.843628	0.000233371	0.00437547
KMT2E	101.545	108.652	132.653	75.8491	65.1661	73.4535	-1.59792	-0.676196	0.000235413	0.00440752
AHCTF1	109.911	92.1177	137.855	78.2398	58.5897	69.8878	-1.64446	-0.717618	0.000236504	0.00442174
SREBF1	62.3115	44.8778	66.7601	31.7306	39.7573	30.3085	-1.71953	-0.782017	0.000239195	0.00446576
CXXC5	52.7917	46.4525	40.4606	79.3265	69.0522	91.6386	1.71183	0.775539	0.000239849	0.00447169
UPF2	71.5429	57.0815	71.9621	42.3799	42.4476	36.0136	-1.6617	-0.732657	0.00024315	0.00452687
WASL	62.0231	54.7195	58.9569	40.6412	27.8002	35.3005	-1.68011	-0.74856	0.000244166	0.00453943
LAYN	36.3484	31.4932	30.9235	70.8505	42.7466	58.8341	1.74981	0.807196	0.00024472	0.00454338
KNTC1	63.4654	55.5068	65.315	44.9879	27.8002	33.8742	-1.71344	-0.776892	0.000245104	0.00454417
NPC1L1	3.17327	2.36199	4.33507	0.217333	0.298927	0.35657	-10.7962	-3.43245	0.00024545	0.00454424
STC2	569.17	486.177	603.442	344.69	321.347	338.742	-1.65294	-0.725038	0.000247319	0.00457063
USP15	82.2166	66.5294	65.026	51.0732	35.2734	37.4399	-1.71247	-0.776078	0.000247563	0.00457063
TUT4	71.8313	67.3168	68.2051	48.6825	33.1809	41.0056	-1.67034	-0.740138	0.00024835	0.0045736
ABCA5	11.8277	10.2353	7.80312	4.34666	2.69034	2.85256	-2.86656	-1.51932	0.000248412	0.0045736
FAU	71.8313	155.498	63.581	156.48	221.206	181.138	1.92473	0.944659	0.000253464	0.00466017
ETFB	57.4074	53.1448	37.8596	74.1105	98.0481	82.7243	1.71746	0.780274	0.000253831	0.00466047
KDM6B	49.9069	52.3575	78.8983	24.3413	42.1487	33.5176	-1.82205	-0.865563	0.000254342	0.0046634
AP1S1	57.4074	63.7738	35.2586	73.4585	128.838	86.6466	1.84934	0.887011	0.000257143	0.00469982
PYGM	1.15392	3.54299	8.38113	0.217333	0	0	-34.7324	-5.11821	0.000257998	0.00469982
TLK2	64.3309	83.8507	87.2794	50.8559	38.8605	48.8501	-1.69121	-0.75806	0.000258096	0.00469982
SLC16A6	12.9816	3.93665	2.31204	1.73866	0.597854	0.713141	-5.91665	-2.56478	0.000257582	0.00469982
ZFY	25.0977	24.8009	26.8774	14.1266	9.56567	15.6891	-1.95435	-0.966692	0.000257479	0.00469982
NFE2L2	197.031	200.769	248.544	151.046	105.521	138.349	-1.63526	-0.709518	0.000259992	0.00472498
IRAK2	19.0396	20.0769	17.6293	8.04131	9.26674	11.7668	-1.99596	-0.997084	0.000260188	0.00472498
COL1A2	6620.6	6937.17	8083.46	14267.9	8811.77	15589.6	1.78682	0.837391	0.000262371	0.00475812
USP25	85.9668	69.6788	95.9495	60.2012	30.4906	47.7804	-1.81248	-0.857961	0.000263268	0.00476787
IQCN	6.34654	3.93665	12.7162	1.73866	2.09249	2.13942	-3.89681	-1.96229	0.000264155	0.00477742
RBM4B	16.1548	18.1086	15.8953	28.9053	32.882	31.0216	1.84998	0.88751	0.000264686	0.00478054
ZSWIM6	66.3502	64.5611	89.8804	46.5092	37.3659	46.3542	-1.6986	-0.764347	0.000265132	0.00478209
TMEM256	8.07742	16.9276	7.51412	19.9946	26.6045	21.0377	2.12468	1.08724	0.000265509	0.0047824
GSTP1	145.105	281.864	123.405	321.87	381.132	333.75	1.88626	0.915525	0.000266303	0.0047902
ATP5ME	17.8857	43.3032	13.5832	47.5959	63.0736	48.4936	2.14345	1.09994	0.000269228	0.00483628
FADD	21.9244	25.5882	14.4502	36.7292	37.9637	40.649	1.88437	0.914083	0.000270654	0.00485533
GDF9	1.73088	3.54299	5.78009	0.217333	0.597854	0	-11.7896	-3.55945	0.000273382	0.00489766
IFIT1	2.59631	1.96833	2.89005	8.47598	6.87532	8.20112	3.08818	1.62676	0.000276259	0.00494254
BLVRB	12.1161	22.8326	8.09213	26.2973	40.6541	24.9599	2.15935	1.1106	0.000279175	0.00498801
NUDT2	9.51982	13.3846	9.24815	18.908	23.0174	22.4639	2.01667	1.01197	0.000281704	0.00502643
TAB2	163.568	150.774	167.334	115.404	77.1232	105.545	-1.6135	-0.690192	0.000283312	0.00504835
FAM156A	2.59631	8.66064	6.93611	8.69331	63.3725	6.77484	4.3291	2.11407	0.000283752	0.00504941
NDUFS2	74.7161	66.5294	54.9109	93.0184	118.076	104.475	1.60532	0.682858	0.000286629	0.0050938
OSR1	32.0212	20.8643	15.6062	39.1199	44.5401	48.137	1.91216	0.9352	0.000288143	0.00511387
CD99	147.99	186.204	148.548	228.417	301.02	256.374	1.63029	0.705133	0.00028864	0.00511586
EPB41L3	122.604	110.62	190.454	72.1545	95.6567	84.5072	-1.68351	-0.751473	0.000291823	0.00516538
NDUFA2	13.27	23.2263	10.1152	26.5146	33.1809	31.3782	1.9822	0.987104	0.000292891	0.00517019
TMEM217	3.75023	5.51131	4.91308	1.08666	0.597854	0.713141	-5.35886	-2.42193	0.000292549	0.00517019
CSPP1	19.6166	20.4706	23.6984	12.1706	7.47318	11.4103	-2.02748	-1.01969	0.000293262	0.00517019
BANF1	45.5797	83.4571	45.6627	86.2811	121.364	103.762	1.78938	0.83946	0.000294508	0.00518529
gene:ENSG00000266086	30.0018	32.6742	46.8187	3.69466	21.8217	16.0457	-2.64973	-1.40585	0.000296798	0.00521869
IER5	76.7355	107.077	145.658	49.7692	82.5039	52.4159	-1.78483	-0.835786	0.000298453	0.00523674
DTYMK	19.6166	31.8869	29.4785	45.2052	48.1273	46.7107	1.7475	0.805289	0.000298612	0.00523674
CD63	329.443	499.168	265.595	561.153	779.004	626.851	1.79882	0.847053	0.000299138	0.00523906
DAG1	108.18	112.588	134.098	176.909	193.705	186.486	1.56287	0.644194	0.000300914	0.00526322
PIGA	11.2507	12.991	10.6932	5.65065	4.78283	4.27885	-2.28448	-1.19186	0.000301729	0.00527054
TP53I3	37.7908	33.4616	19.6523	51.5079	71.1447	45.9976	1.8588	0.894374	0.00030702	0.00535592
TIMM8B	10.3853	22.0453	6.3581	25.8626	31.6863	29.2388	2.26663	1.18055	0.000311741	0.00543117
MRPL51	54.5226	65.3484	45.9517	79.9785	96.8524	95.5609	1.64818	0.720876	0.00031383	0.00546039
TARS1	224.725	225.177	230.337	137.137	157.236	137.636	-1.57797	-0.658065	0.000318166	0.0055286
CNN2	149.144	172.425	151.438	236.023	248.109	270.994	1.59768	0.675975	0.000319089	0.0055374
ASCC3	206.84	183.448	212.129	144.309	119.87	116.955	-1.57439	-0.654798	0.000322041	0.00558134
ATP2A3	4.32719	11.81	4.33507	1.73866	2.09249	0.35657	-4.53187	-2.1801	0.000323164	0.00559352
NUTF2	57.4074	74.7964	60.98	95.6264	111.799	99.1266	1.59832	0.676558	0.000324232	0.0056047
FMNL2	84.8129	79.9141	99.7066	62.1572	47.2305	48.4936	-1.66395	-0.734611	0.000325146	0.0056132
TET3	31.7327	37.7919	44.7957	19.56	22.4195	21.3942	-1.81468	-0.859712	0.000326655	0.00562465
MANF	105.295	190.534	123.116	80.8478	85.4932	84.1506	-1.66818	-0.738275	0.00032636	0.00562465
OXLD1	6.34654	6.29865	3.46806	12.1706	13.7506	13.9062	2.47386	1.30676	0.000327994	0.0056404
FBXO30	74.4277	79.1267	73.6962	48.0305	45.138	45.9976	-1.62036	-0.696311	0.000330257	0.00567197
TMSB10	696.101	1271.93	736.095	1370.28	1934.36	1629.88	1.82528	0.868118	0.000332065	0.00569566
MGST3	40.9641	73.6154	34.9696	84.7598	102.831	84.1506	1.82714	0.869589	0.000334942	0.00573734
PFDN1	39.2332	34.6426	28.0334	58.2452	54.7037	54.5553	1.65409	0.726042	0.00033579	0.00573734
MAP3K8	4.61567	2.36199	4.33507	0.434666	0.597854	0.713141	-6.62241	-2.72736	0.000335558	0.00573734
CIAO3	10.0968	10.629	13.8722	16.952	26.6045	26.3862	1.98175	0.986772	0.000337062	0.00575169
GLMP	35.7714	38.9729	33.5245	54.7679	69.65	52.7724	1.64329	0.716589	0.000337669	0.00575212
NDUFB8	32.3097	51.5702	33.8135	54.3332	77.721	72.0272	1.74143	0.800272	0.000337953	0.00575212
RHOQ	79.0433	77.5521	61.847	53.8985	32.2841	39.5793	-1.72162	-0.783765	0.000339024	0.00576297
BAZ1A	74.1392	74.7964	99.7066	52.3772	52.0133	44.9279	-1.66246	-0.733322	0.000339971	0.00577169
S100A16	115.969	144.475	104.331	167.998	249.305	175.433	1.62741	0.702577	0.000341626	0.00579239
NDUFB3	20.1936	22.0453	17.0513	32.8173	35.2734	36.3702	1.76525	0.819872	0.000342507	0.00579868
RBM33	99.5254	81.4887	108.666	57.5932	57.6929	64.5392	-1.62849	-0.703539	0.000343306	0.00579868
HMBOX1	32.8866	23.6199	33.5245	15.2133	17.9356	16.7588	-1.85099	-0.888301	0.000343007	0.00579868
MTLN	2.30783	8.66064	2.60104	9.56264	12.256	14.6194	2.76149	1.46544	0.000345486	0.00582811
SFRP1	276.363	106.683	123.694	97.3651	31.0884	89.1426	-2.32822	-1.21923	0.000347818	0.00585549
CCDC8	26.2516	32.2806	30.3455	58.0279	37.3659	65.609	1.81367	0.858912	0.00034799	0.00585549
TAX1BP3	99.2369	122.43	91.6145	150.177	195.797	154.395	1.6019	0.679785	0.000348992	0.00586492
SUOX	14.1355	9.84163	9.53715	19.9946	23.3163	22.8205	1.92537	0.945139	0.000349666	0.00586882
ICAM5	22.2129	17.7149	17.0513	8.47598	11.3592	9.6274	-1.97079	-0.97877	0.000351504	0.00589223
POLR2G	17.8857	35.0362	17.3403	38.9026	52.3122	44.5713	1.95182	0.964822	0.000352848	0.00590516
ERBB2	52.2148	42.5159	57.2229	83.6731	80.4114	87.7163	1.63079	0.705574	0.000353163	0.00590516
ATP5MG	38.3677	72.8281	27.7444	78.2398	104.923	85.9335	1.94493	0.959717	0.000355244	0.00593248
ZNF654	31.4442	29.1312	23.9874	18.4733	13.1528	11.4103	-1.90623	-0.930722	0.000356226	0.00594141
AVL9	76.1585	67.7104	73.6962	46.9439	43.9423	44.5713	-1.60709	-0.684455	0.000357552	0.00594344
SLK	117.988	119.674	156.351	84.3251	66.0629	94.4912	-1.61269	-0.689466	0.000357688	0.00594344
CLIP1	126.931	124.005	192.477	95.4091	83.6996	91.9952	-1.63702	-0.711072	0.000356849	0.00594344
HSPA9	420.314	415.317	475.991	241.022	293.546	276.699	-1.62167	-0.697477	0.000359732	0.00596993
MXD4	138.47	128.335	129.474	185.385	241.234	202.532	1.58326	0.6629	0.000360668	0.00597057
ADIPOR2	109.622	126.367	171.091	79.9785	92.6674	78.8021	-1.62015	-0.696128	0.000360557	0.00597057
OSBPL8	101.256	100.778	111.267	75.8491	58.8886	63.4695	-1.56678	-0.647801	0.000363477	0.00600958
AMD1	49.6184	80.7014	79.4763	48.4652	24.2131	40.2925	-1.8488	-0.886593	0.000364249	0.00601486
COMMD9	18.4627	23.2263	19.0743	34.5559	36.4691	33.8742	1.74918	0.806681	0.000366613	0.00604638
CNST	30.5788	28.3439	34.6806	15.8653	17.9356	18.8982	-1.8147	-0.85973	0.000367348	0.006051
NTHL1	7.21198	9.44797	5.78009	13.692	17.3378	17.1154	2.15247	1.10599	0.000370209	0.00609059
MARK3	121.45	116.525	146.236	77.5878	87.8846	81.2981	-1.566	-0.64708	0.000370727	0.00609157
SIX4	37.5023	40.1539	49.4198	28.9053	20.0281	21.3942	-1.78254	-0.833936	0.000372557	0.00611408
COX6B1	30.2903	69.2851	33.8135	71.7198	96.8524	84.8638	1.90883	0.932692	0.000373154	0.00611632
SMUG1	12.1161	9.84163	7.80312	22.1679	15.5442	23.8902	2.06352	1.0451	0.000374367	0.00612864
ARFGEF1	126.642	107.077	140.456	95.4091	54.4047	77.3758	-1.64412	-0.717312	0.000375219	0.00613505
ACAA2	62.3115	62.9865	47.9748	95.4091	89.9771	91.9952	1.61667	0.693026	0.000377805	0.00616974
KLHL29	24.5207	30.3122	37.8596	17.8213	17.0388	14.2628	-1.8678	-0.901339	0.000381155	0.0062168
SFXN3	48.176	44.0905	42.7727	73.0238	68.4543	76.3061	1.60669	0.684093	0.000384725	0.00625967
GDF15	21.9244	16.9276	17.0513	4.12932	14.3485	3.92227	-2.49796	-1.32075	0.000384465	0.00625967
SCG5	3.75023	2.75566	2.89005	0	0	0.713141	-14.3462	-3.84259	0.000385353	0.00626222
EIF2A	113.949	109.833	99.1286	72.5892	67.2586	68.8181	-1.53813	-0.62118	0.000388887	0.00631194
CHL1	19.0396	12.991	16.4733	9.77998	5.67962	6.0617	-2.19265	-1.13268	0.000390681	0.00633332
UGGT2	89.4286	83.4571	81.2103	66.7212	24.8109	41.3622	-1.90306	-0.928319	0.000392308	0.00635118
ANKRD27	38.6562	38.9729	46.8187	23.9066	23.6152	25.6731	-1.71592	-0.778979	0.000392738	0.00635118
HBP1	99.5254	129.516	113.868	77.3705	72.9382	66.6787	-1.56302	-0.644334	0.000396978	0.00641195
OLAH	3.46175	3.14932	4.04606	0.434666	0.896781	0	-7.22092	-2.85218	0.000398446	0.00642784
NPY4R	0.576959	0.787331	0	3.25999	3.2882	4.99199	8.18431	3.03286	0.000400337	0.00643493
INO80	67.5042	68.4978	104.042	50.2039	46.0348	43.145	-1.7209	-0.783162	0.000400017	0.00643493
TEAD2	31.4442	32.2806	25.1434	48.0305	52.9101	46.7107	1.674	0.743299	0.000399692	0.00643493
CSGALNACT1	21.6359	14.5656	17.3403	9.99731	2.09249	9.6274	-2.45413	-1.29521	0.000400878	0.00643583
ERI1	32.5982	27.5566	26.0104	20.4293	12.256	10.6971	-1.938	-0.954571	0.000403634	0.00646447
TNFRSF1A	157.51	144.475	97.6836	207.987	223	217.508	1.62367	0.699261	0.000403418	0.00646447
NME4	50.1954	64.5611	55.7779	83.0211	98.0481	93.778	1.61656	0.692925	0.000407466	0.00651799
CDK9	27.1171	35.0362	26.2994	44.7706	49.024	55.2684	1.68989	0.756932	0.000411405	0.00655995
RALGAPA1	51.6378	46.4525	60.98	34.3386	27.2024	32.4479	-1.69421	-0.760615	0.00041157	0.00655995
FMN1	37.7908	38.5792	48.8418	23.9066	25.7077	19.2548	-1.80778	-0.854217	0.000411313	0.00655995
OCLN	2.88479	2.75566	3.75706	0.434666	0.298927	0	-10.1319	-3.34083	0.000420533	0.00669478
CUL4B	200.205	190.534	183.229	160.609	71.7425	101.266	-1.71631	-0.779314	0.000422534	0.0067186
SYT1	27.1171	27.5566	26.5884	15.4306	16.441	9.27083	-1.91298	-0.935819	0.000425029	0.00675019
NUDT1	8.65438	8.66064	6.93611	15.4306	19.1313	14.976	2.04638	1.03307	0.000429564	0.00681407
MYBL1	30.2903	31.8869	39.3046	24.9933	7.47318	12.8365	-2.213	-1.146	0.00043066	0.00681519
BRWD1	76.1585	52.7512	65.026	40.8586	36.1702	40.649	-1.65811	-0.729538	0.000430236	0.00681519
DSP	64.0424	77.5521	155.195	57.1585	43.0455	54.9118	-1.91364	-0.936319	0.000432265	0.00683246
FBXL6	13.5585	19.2896	16.1843	6.30265	10.4624	5.34856	-2.18754	-1.12931	0.000433742	0.00684766
DIPK2A	58.5613	45.6652	44.5067	34.7732	23.9142	26.7428	-1.72521	-0.786769	0.000440132	0.00693208
PPP4R3A	98.3714	99.2037	112.134	77.5878	60.0843	56.3381	-1.58164	-0.661422	0.000440043	0.00693208
LIMD2	10.0968	12.991	10.1152	19.3426	22.4195	22.1074	1.9299	0.948524	0.000441416	0.00694408
SETX	139.047	137.783	141.323	106.276	56.7962	90.9255	-1.64275	-0.716115	0.000448071	0.00704044
NENF	14.1355	20.4706	12.1382	23.9066	31.6863	30.6651	1.86273	0.897419	0.000448921	0.00704547
NOP10	38.0793	56.6878	31.7905	58.6799	84.8953	77.0192	1.75009	0.807427	0.000450717	0.00706531
RAPH1	44.7143	40.1539	47.6858	30.4266	20.327	23.8902	-1.75311	-0.809914	0.000451989	0.0070691
NRG1	13.847	25.5882	30.3455	12.6053	8.36996	12.1234	-2.09424	-1.06642	0.000452023	0.0070691
PANK3	96.0636	94.086	99.7066	67.3732	59.4865	50.9896	-1.60264	-0.680454	0.000455646	0.00711032
gene:ENSG00000288710	8.07742	11.81	9.82616	5.43332	2.39142	0.713141	-3.22219	-1.68804	0.000455728	0.00711032
ANK2	8.94286	6.29865	6.3581	2.17333	2.39142	2.49599	-3.09932	-1.63195	0.000461086	0.00718548
ATOX1	19.3281	23.6199	19.9413	31.5133	44.5401	37.4399	1.80335	0.85068	0.00046327	0.00721107
FOXJ3	63.4654	72.8281	73.9852	48.0305	45.4369	32.4479	-1.64494	-0.718032	0.000463914	0.00721265
FAM71E2	2.01936	2.36199	6.64711	0.651998	0.298927	0	-9.44446	-3.23947	0.000464844	0.00721866
EIF4A2	301.172	328.317	314.726	227.113	156.04	198.966	-1.61837	-0.694542	0.00046732	0.00724019
gene:ENSG00000285976	36.3484	48.8145	50.5758	27.8186	24.512	25.6731	-1.7225	-0.784501	0.000467014	0.00724019
BTBD2	75.5816	75.5837	89.3024	123.445	124.653	122.66	1.53499	0.618226	0.000469258	0.00726176
SDCBP	204.532	179.118	196.523	157.132	97.1513	106.615	-1.60246	-0.68029	0.000470408	0.00727108
FOS	27.9825	55.9005	66.1821	11.084	36.4691	17.1154	-2.3227	-1.2158	0.000470955	0.00727108
IFITM10	2.30783	7.08598	3.46806	1.08666	0	0.35657	-7.34218	-2.87621	0.000472277	0.00727745
COX8A	35.483	80.7014	35.5476	81.7171	110.005	93.4215	1.88689	0.916012	0.000472462	0.00727745
SCHIP1	4.61567	1.57466	0.289005	9.34531	6.5764	8.55769	3.69309	1.88483	0.000473122	0.00727918
NAGK	45.5797	64.9548	43.3507	75.8491	96.5535	84.1506	1.67754	0.746346	0.000476506	0.00732277
MAP3K5	41.541	33.4616	40.4606	26.2973	15.2453	20.3245	-1.84776	-0.885774	0.000478091	0.00733865
FAM3C	63.4654	57.8688	72.2512	44.5532	35.8713	37.4399	-1.63268	-0.707245	0.000481412	0.0073811
CTHRC1	168.183	203.131	137.855	319.262	237.049	272.063	1.63145	0.706156	0.000483348	0.00740225
AKR1C3	17.8857	10.2353	8.67014	37.3812	13.7506	35.3005	2.34052	1.22683	0.000484501	0.00741066
COX14	4.90415	5.11765	2.60104	9.56264	14.3485	8.20112	2.57596	1.36511	0.000485013	0.00741066
MKLN1	100.968	90.1494	104.331	77.1531	46.0348	52.4159	-1.67257	-0.742064	0.000488531	0.00745324
ERVK3-1	12.4046	18.8959	14.4502	25.2106	32.2841	26.3862	1.85858	0.894199	0.000488921	0.00745324
MINAR1	8.07742	8.66064	10.4042	3.69466	2.69034	3.5657	-2.69402	-1.42976	0.000490973	0.0074674
ASPSCR1	10.9622	11.0226	11.8492	16.0826	28.0991	23.1771	1.9614	0.971882	0.000490817	0.0074674
ZNF552	1.4424	1.181	0.289005	3.47732	5.67962	6.41827	5.07875	2.34447	0.00049168	0.0074696
gene:ENSG00000272772	0.288479	0.787331	4.33507	4.78132	10.4624	9.27083	4.35443	2.12249	0.00049537	0.00751706
ROGDI	8.3659	5.11765	5.78009	12.388	17.0388	14.976	2.21217	1.14546	0.000498479	0.00755563
LMAN1	386.562	348	357.21	261.886	213.135	211.803	-1.58454	-0.664061	0.000499184	0.00755769
OGDH	111.641	81.8824	84.6784	133.225	164.111	145.837	1.58572	0.66514	0.000500977	0.00757621
CNTNAP3	14.424	16.1403	20.8083	11.084	2.39142	6.77484	-2.48997	-1.31613	0.000505444	0.00763508
CCDC150	10.9622	8.26697	12.4272	4.78132	2.69034	5.70513	-2.45066	-1.29317	0.000507896	0.00764606
ZNF148	56.5419	52.7512	58.3789	42.1626	28.3981	28.8822	-1.66177	-0.732724	0.000507425	0.00764606
CDKN2AIP	19.9051	29.5249	26.2994	12.388	14.3485	13.1931	-1.88074	-0.911303	0.000506978	0.00764606
PTPA	100.391	95.267	91.3255	129.748	167.399	151.899	1.55804	0.639734	0.000513055	0.00769141
VPS33B	11.2507	3.93665	5.49109	11.736	21.8217	17.472	2.40912	1.26851	0.000513223	0.00769141
ZMAT5	8.07742	10.629	4.91308	16.0826	16.7399	16.0457	2.1334	1.09315	0.000512749	0.00769141
STAG2	158.664	134.634	149.126	113.665	81.906	81.6546	-1.58814	-0.667338	0.00051172	0.00769141
COX20	16.4433	17.3213	17.3403	36.0772	27.5013	27.8125	1.82254	0.865953	0.000514064	0.00769532
LATS1	52.5032	54.3258	69.0721	39.7719	34.9745	32.8045	-1.62549	-0.700879	0.000519324	0.00776532
SAYSD1	7.50046	6.69231	3.46806	13.4746	13.7506	13.9062	2.34487	1.22951	0.00052147	0.00777991
USP16	69.5235	68.4978	59.824	49.5519	27.8002	37.7965	-1.70337	-0.768395	0.000521084	0.00777991
ZNF844	9.51982	10.2353	15.6062	6.95465	3.58713	3.20913	-2.46756	-1.30308	0.000526381	0.00784437
MRPL43	24.2323	25.9819	17.9183	39.7719	38.2627	41.0056	1.7669	0.821221	0.000530324	0.00789428
AAK1	128.95	95.267	90.1694	69.7638	64.2693	66.3221	-1.56996	-0.65073	0.000531847	0.00789996
QSER1	54.8111	68.1041	58.6679	45.6399	27.2024	34.2308	-1.67516	-0.744301	0.000531894	0.00789996
PPM1D	43.5604	39.3665	45.6627	21.0813	31.0884	21.7508	-1.7578	-0.813775	0.000533093	0.00790893
WEE1	32.3097	37.0045	27.7444	21.5159	13.1528	15.3325	-1.89043	-0.918713	0.000535773	0.00793099
SOD1	104.141	118.1	97.3946	149.96	174.573	167.588	1.54235	0.625132	0.000535731	0.00793099
RPS10-NUDT3	5.19263	10.2353	13.2942	18.6906	18.8324	22.4639	2.08305	1.0587	0.000536578	0.00793407
RANBP9	86.2553	83.0634	94.7935	55.8545	59.7854	47.0673	-1.61588	-0.692324	0.000539357	0.0079663
MAP2K6	7.78894	3.14932	1.15602	19.1253	8.96781	9.98397	3.1279	1.64519	0.000543377	0.00801677
CLINT1	140.778	129.91	168.779	86.4985	99.2438	97.3437	-1.56277	-0.644102	0.000544248	0.00802072
PIM3	34.329	51.1765	47.9748	18.908	31.0884	22.8205	-1.83605	-0.876608	0.000544872	0.00802102
PTPRK	120.007	144.475	162.999	100.625	83.1017	86.6466	-1.57477	-0.655144	0.000547403	0.00803853
ATP5MC1	17.5972	31.4932	18.7853	35.2079	49.6219	42.0753	1.88773	0.916652	0.00054848	0.00803853
RPS6KB1	62.6	57.4751	70.8061	50.4212	30.4906	29.5953	-1.71112	-0.77494	0.000547967	0.00803853
GDF5	0.576959	0.787331	0	2.82533	7.7721	1.78285	8.92138	3.15727	0.000546738	0.00803853
GABARAPL1	108.757	131.878	110.689	75.8491	59.7854	88.4295	-1.56753	-0.64849	0.000549226	0.0080406
NUDT16L1	10.0968	11.81	8.95914	18.6906	23.6152	17.472	1.95923	0.970283	0.000553356	0.00809215
WDR26	235.688	210.217	239.007	174.736	122.261	134.07	-1.58428	-0.663823	0.000556041	0.00811727
FAM83G	46.1567	51.9638	54.9109	29.7746	31.9852	31.3782	-1.64736	-0.720155	0.000556295	0.00811727
RAB6B	4.90415	7.47964	5.49109	1.304	1.49464	2.13942	-3.61273	-1.85309	0.0005587	0.00814342
KRTCAP2	24.2323	42.5159	29.4785	49.1172	65.465	50.9896	1.73512	0.795037	0.000559605	0.00814767
AKR1C1	570.901	605.064	717.309	1179.9	760.471	1245.5	1.68254	0.750642	0.000563194	0.00817307
HIC1	25.6747	41.7285	30.6345	13.4746	19.7292	17.8285	-1.92215	-0.942718	0.000562631	0.00817307
DSG2	111.065	90.1494	124.561	80.8478	66.0629	59.9038	-1.57051	-0.651234	0.000562474	0.00817307
UBE2D4	10.0968	6.69231	8.09213	13.4746	19.1313	19.9679	2.03315	1.02371	0.000565231	0.00819369
NDUFB9	33.4636	46.8462	30.6345	47.1612	83.1017	63.8261	1.75333	0.810093	0.000566669	0.00820559
USO1	271.459	241.711	204.037	192.122	107.315	130.148	-1.66579	-0.736205	0.000570415	0.00825085
COL3A1	1540.77	1889.59	2346.43	4129.76	2156.46	4428.96	1.85484	0.891294	0.000573181	0.00826388
MFAP1	31.4442	27.9502	25.7214	42.1626	49.6219	52.7724	1.67076	0.7405	0.000572197	0.00826388
EHD2	450.893	385.792	482.927	664.604	722.507	737.031	1.60549	0.683016	0.00057264	0.00826388
CHST2	76.1585	111.407	135.543	58.2452	79.2157	58.121	-1.65176	-0.724005	0.00057896	0.00832914
UBE3B	54.8111	52.7512	53.7549	83.6731	78.02	98.0569	1.59488	0.673451	0.000578789	0.00832914
COX5B	28.8479	61.0181	24.8544	60.2012	89.0803	67.7484	1.90103	0.926784	0.000580413	0.00834101
BABAM1	40.9641	44.4842	45.6627	57.1585	90.276	71.3141	1.6624	0.73327	0.000584124	0.00838527
BRAT1	26.8286	31.0996	23.4094	38.6852	43.9423	55.9816	1.69841	0.764186	0.000587129	0.00841729
AIP	18.7512	18.5023	15.6062	29.7746	32.2841	34.2308	1.80904	0.855223	0.000587621	0.00841729
TIMM17B	11.5392	17.7149	7.51412	18.908	35.5723	22.4639	2.11068	1.07771	0.000590383	0.00844776
CAPN7	62.0231	65.3484	62.714	50.4212	29.8927	31.3782	-1.68061	-0.748988	0.000594909	0.00849423
C11orf98	16.1548	12.2036	9.82616	23.2546	25.1099	21.3942	1.82414	0.867219	0.000594644	0.00849423
NIPA1	26.2516	20.4706	25.7214	15.2133	12.256	12.1234	-1.81497	-0.85995	0.000596344	0.00850558
SNX17	86.8323	94.086	60.691	112.578	137.805	131.931	1.585	0.664481	0.000599696	0.00854423
UBA2	120.007	119.674	120.515	81.9345	77.4221	78.0889	-1.51157	-0.596048	0.000600433	0.00854557
NIBAN1	124.623	127.154	126.873	85.8465	85.7921	75.2364	-1.52157	-0.605557	0.000601255	0.00854812
UQCRC1	128.373	137.389	103.753	172.997	225.391	176.146	1.55729	0.639035	0.000604195	0.00858074
ROBO2	12.4046	10.629	18.4963	7.60665	2.69034	5.70513	-2.5534	-1.35242	0.000606205	0.00860009
AAAS	36.6369	44.0905	32.9465	52.5945	70.8457	62.3998	1.63885	0.712688	0.000607473	0.0086089
TIMM10	4.90415	18.1086	7.22512	22.6026	24.8109	19.9679	2.26888	1.18198	0.00060957	0.00862022
TARBP2	13.5585	21.2579	11.5602	26.0799	31.9852	27.0994	1.87471	0.90667	0.000609374	0.00862022
SDHAF2	13.847	13.7783	12.4272	24.3413	23.9142	22.4639	1.77892	0.831002	0.000612241	0.00864879
CD59	520.705	472.398	424.259	731.108	802.32	737.388	1.60184	0.679734	0.000614501	0.0086715
TOP1	188.954	159.434	184.096	126.053	101.934	118.025	-1.53905	-0.622041	0.000615782	0.00868037
FHOD1	64.3309	60.6245	69.6501	81.4998	122.56	105.188	1.58007	0.659988	0.000621866	0.00875685
UQCRQ	22.7899	59.4435	23.1204	64.5478	72.6393	65.9655	1.93982	0.95592	0.000623844	0.00877541
CRYZ	13.847	10.2353	8.95914	26.5146	20.0281	17.8285	1.96723	0.976168	0.000627221	0.00881358
MYO9A	95.7751	79.9141	102.597	66.2865	49.024	57.7644	-1.6053	-0.682845	0.000629632	0.00883355
RSL1D1	117.988	126.76	136.41	86.2811	81.6071	81.2981	-1.52312	-0.607034	0.000630636	0.00883355
COA3	9.23134	16.5339	7.51412	22.1679	22.4195	19.9679	2.0088	1.00633	0.000630593	0.00883355
PHLPP2	23.3668	27.9502	41.9057	18.0386	14.6474	16.7588	-1.88238	-0.912558	0.000633355	0.00886231
FKBP5	167.318	101.959	124.85	197.556	250.501	190.409	1.6164	0.69278	0.000640935	0.00893455
NFKB2	55.6765	50.3892	64.159	32.8173	41.2519	32.4479	-1.61168	-0.688568	0.000640824	0.00893455
DRAP1	113.949	116.525	115.024	161.044	212.537	161.17	1.54721	0.62967	0.000641018	0.00893455
TMEM101	13.5585	17.3213	7.51412	21.5159	33.1809	22.8205	2.03821	1.0273	0.000641207	0.00893455
WBP1L	55.6765	45.6652	49.7088	79.5438	78.3189	85.5769	1.59205	0.67089	0.000642924	0.00894781
IKBKG	40.0986	34.6426	33.2355	56.0719	53.209	65.9655	1.60195	0.679833	0.000643505	0.00894781
SIRPA	71.5429	71.6471	65.604	125.618	80.4114	125.869	1.59103	0.669964	0.000644246	0.00894877
KMT5A	49.9069	58.2625	75.4302	41.0759	33.4798	36.7268	-1.64473	-0.71785	0.000645119	0.00895153
WDR43	56.2535	53.1448	62.714	36.7292	31.0884	40.649	-1.60253	-0.680355	0.000645973	0.00895403
PRSS3	5.19263	3.54299	3.46806	5.86799	30.7895	6.77484	3.52163	1.81624	0.000648039	0.00897332
PARK7	95.1982	106.29	71.6731	128.444	152.752	149.403	1.5795	0.659464	0.00065418	0.00903952
UQCC2	19.6166	32.2806	10.1152	33.2519	51.1165	45.641	2.10826	1.07605	0.000653547	0.00903952
RNASEH2A	19.0396	24.0136	17.6293	32.5999	38.2627	32.8045	1.7311	0.791689	0.000656735	0.0090654
WNT2B	8.65438	9.84163	12.1382	3.47732	4.18498	5.34856	-2.43348	-1.28302	0.000661264	0.00909193
TUFT1	12.4046	14.172	18.7853	8.91064	5.08176	6.0617	-2.19729	-1.13572	0.000661254	0.00909193
TTN	2.59631	2.36199	8.09213	0.651998	0.597854	0.713141	-6.45672	-2.6908	0.000661393	0.00909193
NET1	16.1548	20.0769	33.5245	12.388	8.36996	13.5497	-2.03749	-1.02679	0.000660289	0.00909193
BHLHE40	26.2516	46.8462	41.9057	17.8213	26.6045	14.976	-1.92476	-0.944676	0.000667111	0.00915161
MSRB1	7.78894	10.629	6.0691	12.1706	22.4195	17.1154	2.12135	1.08498	0.000667111	0.00915161
ELP6	17.0203	19.6833	11.2712	28.9053	28.0991	27.0994	1.7983	0.846636	0.00067365	0.00923178
PEX16	8.3659	5.11765	3.17905	11.084	17.3378	13.1931	2.46149	1.29953	0.000674792	0.00923791
RERE	125.489	142.507	236.984	99.9731	104.923	101.623	-1.6487	-0.721329	0.00067644	0.00924144
SNRNP40	25.0977	25.5882	13.8722	34.3386	43.6434	41.3622	1.85415	0.890755	0.000676143	0.00924144
ATRX	160.683	124.398	139.589	112.144	57.0951	87.0032	-1.65442	-0.726323	0.000680139	0.00928244
MAN2A1	97.7945	75.5837	74.8522	61.2878	45.7358	42.7885	-1.64579	-0.71878	0.000682497	0.00929954
ARL2	30.0018	45.6652	30.9235	51.2905	64.5683	59.1907	1.65568	0.727421	0.000683095	0.00929954
SLC6A15	227.899	155.498	125.428	66.7212	141.094	58.8341	-1.90822	-0.932224	0.000683492	0.00929954
COBLL1	8.07742	9.84163	10.9822	3.69466	2.98927	4.63542	-2.56749	-1.36036	0.000685221	0.00931354
SH3TC1	2.30783	3.93665	5.20208	1.08666	0	0.35657	-6.53129	-2.70737	0.000691879	0.00939443
MRPS34	36.3484	37.3982	38.7266	43.9012	78.6178	69.1747	1.69505	0.761328	0.000694422	0.00941934
VEPH1	46.4452	33.8552	44.2177	24.9933	22.7185	26.3862	-1.70798	-0.772288	0.000697519	0.0094517
SLC25A37	26.5401	35.8235	34.9696	13.2573	22.1206	16.7588	-1.87852	-0.909597	0.00069991	0.00947444
HDAC4	38.6562	41.3349	49.7088	23.4719	25.1099	28.1691	-1.71584	-0.778914	0.000701497	0.00948627
PEF1	38.9447	44.8778	29.7675	54.5505	69.3511	60.9735	1.63542	0.709662	0.000705781	0.00952897
PSMB4	85.9668	136.208	90.4584	150.394	181.748	162.953	1.58914	0.668247	0.000707091	0.00952897
CDC42BPA	183.473	177.937	219.065	149.09	105.82	119.451	-1.54677	-0.62926	0.000707522	0.00952897
KLHDC7B	2.01936	5.51131	3.46806	0.651998	0.597854	0	-7.1649	-2.84095	0.000706732	0.00952897
MIEN1	15.8664	29.5249	17.9183	33.9039	50.5187	34.9439	1.90426	0.92923	0.000709223	0.0095422
PLPP1	27.694	29.9186	20.2303	56.9412	36.4691	42.4319	1.76441	0.819184	0.000717169	0.00963936
LBH	12.1161	29.9186	24.8544	55.6372	27.5013	54.9118	2.07239	1.05129	0.000718335	0.00964528
EDEM3	112.218	114.95	113.579	86.2811	65.764	68.4615	-1.52731	-0.610995	0.00072043	0.00966364
MBNL1	161.837	166.52	194.211	131.269	98.0481	107.328	-1.54657	-0.629073	0.000721344	0.00966615
MRPL14	13.5585	24.0136	11.2712	27.8186	33.1809	30.3085	1.90152	0.927152	0.00072608	0.00969318
AGO2	73.8507	74.0091	104.331	45.8572	53.8069	55.9816	-1.63177	-0.706435	0.000726277	0.00969318
KIAA2026	41.541	40.1539	41.6167	28.0359	16.441	23.1771	-1.79776	-0.846199	0.000724942	0.00969318
UBL7	27.1171	25.5882	28.9005	37.8159	51.1165	48.137	1.6526	0.724737	0.000724935	0.00969318
CENPJ	59.7152	59.0498	88.4354	47.1612	32.882	43.8582	-1.67201	-0.741585	0.00072773	0.00970282
USP53	24.2323	22.0453	25.1434	17.1693	9.56567	11.0537	-1.8393	-0.879157	0.000729764	0.00971193
TRIM24	23.0783	27.1629	30.6345	15.4306	13.7506	14.976	-1.81987	-0.863838	0.000729875	0.00971193
ZNF644	47.5991	37.0045	32.9465	28.0359	16.1421	17.8285	-1.87137	-0.904094	0.00073349	0.00975028
CCDC112	14.424	16.1403	16.1843	9.99731	5.67962	4.99199	-2.1213	-1.08495	0.000737812	0.00979794
YIPF6	45.5797	50.7828	43.6397	31.0786	23.9142	28.1691	-1.65017	-0.722615	0.00073903	0.00980432
ADAMTS6	56.8304	50.3892	68.4941	39.1199	35.8713	36.0136	-1.58729	-0.666569	0.000741866	0.00981256
BLOC1S1	18.7512	27.5566	14.1612	33.2519	46.3337	32.8045	1.87927	0.91017	0.000741808	0.00981256
BRD4	107.891	109.833	184.096	78.2398	86.6889	83.794	-1.61844	-0.694606	0.000741783	0.00981256
SLC1A3	4.90415	6.29865	6.0691	1.304	2.39142	0.713141	-3.76365	-1.91213	0.000743762	0.0098181
RSF1	100.102	68.4978	112.423	56.2892	62.1768	55.2684	-1.62428	-0.699802	0.000743454	0.0098181
DLG1	60.0037	66.1358	60.98	44.9879	29.2949	39.9359	-1.62123	-0.697089	0.000759336	0.0100137
ZNF362	20.482	20.8643	18.2073	31.9479	31.6863	39.2227	1.71025	0.77421	0.000762482	0.0100353
POLR3GL	14.7124	12.991	12.4272	24.3413	23.6152	22.8205	1.76541	0.820006	0.000762051	0.0100353
RBMX	211.744	211.398	200.858	147.352	127.642	129.792	-1.52726	-0.610944	0.000763851	0.0100434
OTUD4	68.0811	81.4887	80.0543	53.4639	42.4476	45.9976	-1.59545	-0.673965	0.000765829	0.0100495
UBTF	92.3134	103.534	96.5275	152.133	131.528	163.309	1.53161	0.615046	0.000765153	0.0100495
RHPN2	5.19263	9.0543	8.38113	1.73866	3.58713	1.78285	-3.14939	-1.65507	0.000770097	0.0100956
TRIP11	114.238	83.4571	78.3202	65.6345	51.1165	52.7724	-1.62312	-0.698768	0.000773155	0.0101257
CEP170B	145.105	150.38	213.574	104.754	109.407	112.676	-1.56086	-0.642338	0.000776253	0.0101562
NME3	9.23134	11.4163	8.38113	17.3866	20.327	16.0457	1.88411	0.913883	0.000778428	0.0101747
PYROXD1	26.2516	25.5882	19.3633	16.952	10.7614	8.91426	-1.88483	-0.914437	0.000780258	0.0101886
MRPS14	11.5392	8.66064	8.95914	18.4733	19.7292	17.1154	1.88116	0.911625	0.000782915	0.010199
TMEM131	148.278	111.407	158.086	99.3211	89.6781	78.4455	-1.56102	-0.642487	0.000782186	0.010199
ETF1	177.703	180.299	177.449	122.141	115.685	117.312	-1.50233	-0.587199	0.00078336	0.010199
EMP3	130.97	183.448	117.625	212.986	247.213	222.857	1.5856	0.665026	0.000784697	0.0102064
CLMP	280.979	222.421	245.076	192.557	128.24	147.977	-1.59388	-0.672545	0.000789502	0.0102589
SRSF3	167.895	209.43	208.083	144.309	116.283	118.025	-1.53808	-0.621133	0.000793893	0.0103001
AKIRIN2	57.9843	64.1675	60.402	43.2492	33.4798	36.0136	-1.58416	-0.663714	0.000794221	0.0103001
EVC2	15.2894	17.7149	25.1434	10.2146	7.17425	12.1234	-1.9837	-0.988193	0.000795145	0.010302
SOS1	131.258	111.801	116.18	99.3211	63.9704	62.7564	-1.58057	-0.660443	0.000799435	0.0103274
SF1	179.146	200.769	245.943	113.448	161.421	121.591	-1.58031	-0.660205	0.000799192	0.0103274
ATXN2L	260.785	256.67	386.688	146.265	222.402	183.634	-1.63924	-0.71303	0.000798299	0.0103274
CDK15	14.424	8.26697	4.91308	21.9506	18.2346	18.1851	2.1088	1.07642	0.000804452	0.010372
OGT	226.745	239.349	262.705	179.952	125.25	157.604	-1.57149	-0.652137	0.000804359	0.010372
RNF181	20.7705	36.2172	15.8953	37.5986	58.2908	41.3622	1.89712	0.923807	0.00080728	0.0103984
ZFAND5	164.433	162.977	166.467	122.358	94.7599	105.188	-1.52176	-0.605743	0.00081121	0.0104389
UHRF1BP1L	61.1576	48.0272	42.4837	40.2066	22.1206	20.6811	-1.80834	-0.854668	0.000814295	0.0104685
PRNP	156.644	147.231	160.687	114.1	96.8524	91.282	-1.52462	-0.608453	0.000834972	0.0107239
EPHB6	0.288479	1.96833	1.44502	7.60665	2.69034	6.41827	4.64125	2.21451	0.000840494	0.0107741
PSMD10	24.5207	23.6199	20.8083	40.2066	38.5616	37.4399	1.69757	0.763469	0.000840019	0.0107741
TMEM147	34.906	48.4208	29.1895	52.3772	71.4436	62.0433	1.66129	0.732303	0.000841794	0.0107803
JOSD2	15.2894	22.4389	8.38113	30.4266	38.8605	22.1074	2.00422	1.00304	0.000843232	0.0107883
BTN3A2	27.9825	29.1312	22.5424	42.8146	40.953	49.2067	1.66912	0.739085	0.000844498	0.0107941
CDK5	10.0968	13.3846	7.22512	17.1693	20.327	21.7508	1.94656	0.960924	0.00084802	0.0108264
CSTF2T	21.059	14.172	12.1382	31.9479	23.9142	30.3085	1.8123	0.857825	0.000848653	0.0108264
OPN3	31.1558	20.0769	20.5193	46.0746	37.067	41.7187	1.7309	0.791522	0.000857585	0.0109299
SMIM29	9.51982	10.629	7.22512	13.692	21.2238	18.8982	1.95455	0.966838	0.000860525	0.0109569
NDUFB4	43.8489	52.3575	35.2586	69.7638	66.9597	70.2444	1.59684	0.675223	0.000863857	0.0109888
TPGS1	4.03871	7.08598	4.62407	10.6493	12.5549	11.4103	2.24727	1.16817	0.000865979	0.0110052
MED13	104.718	99.2037	115.602	84.3251	57.394	63.4695	-1.5481	-0.630495	0.000866905	0.0110065
RNF7	40.3871	39.3665	25.1434	59.1145	55.0026	55.9816	1.63286	0.707405	0.000869924	0.0110343
SDHC	50.4839	55.1131	32.3685	69.9812	75.3296	81.2981	1.648	0.720719	0.000872151	0.011052
NUS1	98.3714	100.778	79.7653	65.8518	51.4155	58.4775	-1.5735	-0.653974	0.000874422	0.0110702
MRPL24	25.0977	29.9186	23.4094	33.6866	57.9919	45.2844	1.74516	0.803358	0.000885039	0.0111876
SMC3	87.9862	89.7557	122.827	77.8051	51.1165	53.8421	-1.63769	-0.711663	0.000886224	0.0111876
PLD6	3.75023	5.51131	8.38113	1.956	1.79356	0	-4.26558	-2.09274	0.000885974	0.0111876
URI1	61.7346	56.6878	56.6449	37.5986	26.6045	44.2147	-1.62196	-0.697738	0.000887087	0.0111879
CNN3	148.855	141.72	122.538	198.425	201.776	233.91	1.53171	0.615144	0.000892558	0.0112462
TSPO	40.3871	77.1584	33.5245	79.7611	104.027	86.6466	1.79816	0.846518	0.000893527	0.0112478
FAM222B	15.2894	12.2036	13.2942	22.8199	24.8109	27.8125	1.80273	0.850181	0.000894673	0.0112515
TCEAL8	35.1945	32.2806	17.3403	58.0279	43.0455	48.4936	1.77215	0.825499	0.000895838	0.0112556
RIPK2	38.9447	34.6426	33.5245	22.6026	17.0388	23.8902	-1.6874	-0.754801	0.000912525	0.0114436
YPEL2	15.8664	17.3213	19.0743	9.56264	7.17425	11.4103	-1.86993	-0.902988	0.000912211	0.0114436
LGALS1	410.506	964.48	369.637	1005.16	1262.67	1145.3	1.95703	0.968663	0.000916205	0.0114789
SLTM	125.2	118.1	191.61	97.3651	87.8846	88.0729	-1.59199	-0.670836	0.000922932	0.0115523
DDAH2	21.059	35.8235	20.8083	38.6852	47.8283	48.8501	1.75827	0.814161	0.000924148	0.0115566
TAGLN2	259.92	381.855	270.219	446.836	532.389	492.067	1.61538	0.691878	0.000935953	0.0116875
PPP1R14B	81.0627	127.154	86.9904	134.529	206.559	138.349	1.62751	0.702667	0.000936375	0.0116875
PUM2	109.334	111.407	141.612	83.2385	79.5146	77.0192	-1.51111	-0.595604	0.000938366	0.0117014
ANAPC11	18.7512	49.2082	22.5424	49.7692	63.9704	55.625	1.88386	0.913688	0.000943343	0.0117524
SF3B5	28.5595	51.9638	23.4094	50.6385	80.4114	56.6947	1.81574	0.860556	0.000945447	0.0117676
CDIPT	51.0608	57.0815	50.8648	83.8905	82.5039	78.0889	1.55397	0.635957	0.000947547	0.0117827
DYNLT1	44.1373	57.0815	36.7036	81.0651	69.3511	68.105	1.60524	0.682793	0.000951189	0.0118137
PRTG	4.61567	9.0543	10.1152	2.17333	2.39142	3.5657	-2.96159	-1.56637	0.000951816	0.0118137
INO80D	25.3862	23.2263	31.7905	14.344	17.6367	12.1234	-1.82899	-0.87105	0.000961485	0.0119226
gene:ENSG00000264058	3.17327	2.75566	3.17905	8.47598	8.66889	7.48798	2.682	1.42331	0.000963342	0.0119345
REL	16.1548	11.81	22.2534	10.432	3.2882	7.84455	-2.30672	-1.20584	0.000965892	0.0119438
SRI	40.6756	50.7828	28.0334	62.8092	64.5683	68.4615	1.65064	0.72303	0.000965497	0.0119438
YTHDF3	108.757	90.1494	108.088	77.3705	61.579	61.3301	-1.52558	-0.609356	0.00096873	0.0119567
SHB	25.6747	28.3439	38.4376	11.5186	16.1421	22.4639	-1.87789	-0.909112	0.000968155	0.0119567
STXBP5	161.548	142.507	187.275	114.317	112.098	95.5609	-1.52476	-0.608586	0.000984585	0.0121392
SPIRE1	73.5622	59.4435	81.2103	46.5092	47.8283	41.7187	-1.58065	-0.660521	0.000985346	0.0121392
ITGA11	7.78894	19.6833	15.8953	6.51998	3.2882	7.48798	-2.48257	-1.31183	0.000991459	0.0122032
MEA1	47.0221	58.6561	34.1025	68.4598	89.6781	72.0272	1.65489	0.726738	0.000999122	0.0122758
KCNQ5	2.88479	1.57466	3.46806	0.217333	0.298927	0.35657	-8.79335	-3.13641	0.000999202	0.0122758
NUDT18	4.90415	5.51131	4.62407	8.47598	11.6582	14.2628	2.22297	1.15249	0.00100165	0.0122945
CBWD6	6.34654	7.08598	5.49109	3.04266	0.597854	1.06971	-3.47729	-1.79796	0.00100296	0.0122992
SLC12A2	31.7327	28.3439	23.1204	15.2133	12.5549	19.2548	-1.78542	-0.83626	0.00100645	0.0123307
PDE6D	14.7124	14.172	11.2712	24.5586	23.0174	21.0377	1.73611	0.795857	0.0010119	0.0123746
TMEM106C	12.6931	20.4706	17.9183	27.6013	32.5831	29.2388	1.77058	0.824226	0.00101173	0.0123746
RAD52	9.23134	5.11765	7.80312	14.5613	17.0388	14.6194	2.01492	1.01073	0.00101329	0.0123802
WRN	36.0599	39.3665	43.6397	28.2533	12.8539	22.4639	-1.85713	-0.893073	0.00101614	0.0124036
OLFML3	9.8083	21.6516	10.4042	32.3826	19.4303	32.4479	2.0404	1.02885	0.0010172	0.0124052
SMCR8	78.7549	80.3077	120.804	53.2465	67.5575	51.3461	-1.62834	-0.703402	0.00101895	0.0124152
MSH5	13.27	5.90498	14.4502	5.65065	3.58713	4.63542	-2.42388	-1.27732	0.00102171	0.0124373
ZNF655	100.679	81.4887	80.6323	61.5052	44.8391	57.0513	-1.60541	-0.68294	0.00102501	0.0124601
ARFGEF2	112.218	100.778	131.208	84.3251	76.8243	64.1827	-1.52211	-0.606072	0.00102545	0.0124601
TCEAL7	11.8277	9.44797	7.22512	18.0386	16.1421	19.9679	1.8854	0.91487	0.00102752	0.0124738
CDC42	72.9853	113.376	90.7474	130.617	213.434	116.599	1.66489	0.735428	0.00103063	0.0124828
TEX264	19.9051	27.1629	17.0513	36.2946	43.6434	31.7348	1.77167	0.825107	0.00103035	0.0124828
KIF5B	312.423	318.082	406.34	264.711	163.812	215.012	-1.60974	-0.68683	0.00103202	0.0124828
MIS18BP1	62.8885	56.6878	52.8878	47.3786	19.1313	29.2388	-1.78839	-0.838658	0.00103108	0.0124828
CCDC9B	35.7714	25.5882	21.3863	46.7266	40.3552	56.6947	1.72704	0.788305	0.00103358	0.0124903
ERI3	27.4055	39.3665	27.7444	48.0305	54.1058	52.4159	1.65791	0.729364	0.00103631	0.012512
ATM	197.608	138.177	138.144	119.968	77.1232	100.196	-1.59252	-0.671313	0.00103977	0.0125423
TSPYL1	84.5244	63.3801	58.9569	128.009	88.7814	106.258	1.5623	0.643669	0.00105838	0.0127553
NDUFS5	81.9281	99.5973	78.3202	110.622	150.958	137.636	1.53755	0.62063	0.00106648	0.0128413
CFL1	519.263	703.48	531.479	866.723	1030.7	897.131	1.59438	0.672995	0.00106943	0.0128652
PRPF4B	90.5825	91.724	126.584	79.5438	60.6822	53.129	-1.59068	-0.669641	0.00107477	0.0129176
TINF2	30.5788	29.5249	29.7675	47.1612	46.3337	49.5633	1.58452	0.664044	0.00107601	0.0129209
HOMER1	9.8083	7.47964	9.82616	4.34666	2.39142	3.5657	-2.58318	-1.36915	0.00108043	0.012945
ITPR3	132.989	123.611	241.897	64.5478	129.734	83.0809	-1.79939	-0.847511	0.00108192	0.012945
DYNLL1	105.295	190.14	95.6605	212.334	217.918	211.803	1.64574	0.71874	0.00108137	0.012945
TMEM219	24.2323	41.7285	25.4324	48.0305	62.1768	46.7107	1.73427	0.794329	0.00108088	0.012945
WWC2	63.4654	60.6245	85.5454	46.7266	41.5509	43.145	-1.59667	-0.675066	0.00108571	0.0129787
PPIL4	47.0221	34.6426	57.2229	30.2093	24.2131	28.1691	-1.6879	-0.755231	0.00109061	0.0130256
MRPS26	17.3088	16.1403	12.7162	21.0813	33.4798	30.3085	1.8215	0.865126	0.00109182	0.0130283
ARHGAP1	90.5825	86.2127	91.9035	114.317	147.969	146.194	1.50962	0.594183	0.00109709	0.0130702
SAMD4A	124.046	114.95	171.669	90.1931	65.1661	103.049	-1.59223	-0.671052	0.00109729	0.0130702
SMIM4	1.4424	5.51131	1.73403	7.60665	7.17425	9.6274	3.00043	1.58517	0.00109878	0.0130762
RAB7B	9.23134	4.33032	3.75706	15.8653	9.26674	17.8285	2.442	1.28806	0.00110474	0.0131353
TRAF3IP2	16.7318	12.2036	10.9822	22.3853	24.2131	26.0296	1.78216	0.833628	0.00111214	0.0132115
NEK1	52.2148	41.7285	47.9748	34.1212	22.4195	27.8125	-1.67012	-0.739951	0.00111643	0.0132506
GPR137	18.1742	22.8326	19.0743	34.7732	29.5938	36.0136	1.69222	0.758919	0.00112004	0.0132817
KAT6A	101.833	96.8417	120.515	71.5025	72.3404	70.9575	-1.49352	-0.57872	0.00112321	0.0133073
RAB4B	9.8083	14.5656	6.3581	18.256	22.7185	18.5417	1.98316	0.987803	0.00112448	0.0133105
SCNM1	10.9622	10.629	8.09213	18.4733	22.4195	14.6194	1.8962	0.923113	0.00112707	0.0133293
ACOT2	12.4046	14.5656	6.93611	20.212	20.626	23.1771	1.91709	0.938917	0.00112995	0.0133441
RAB39B	3.46175	3.93665	1.15602	0.217333	0	0	-21.8292	-4.44819	0.00113033	0.0133441
TNKS	124.912	116.525	138.144	93.8878	72.0414	84.5072	-1.51229	-0.596733	0.00113248	0.0133576
CCP110	29.7134	27.5566	26.0104	20.6466	10.4624	12.8365	-1.85249	-0.889467	0.00113517	0.0133776
ZFAND1	20.7705	20.0769	14.7392	10.8666	9.86459	8.20112	-1.86299	-0.897618	0.00113923	0.013403
MRPL28	33.7521	40.5475	27.1664	46.5092	70.8457	50.2764	1.65831	0.729712	0.00113936	0.013403
ZNF358	36.9254	38.9729	40.7496	57.5932	72.6393	53.8421	1.57833	0.658403	0.00114171	0.0134189
GCNA	4.32719	4.33032	13.5832	1.52133	2.39142	2.49599	-3.52411	-1.81726	0.00114315	0.0134239
ELN	0.288479	1.57466	2.31204	9.99731	0.896781	10.3405	5.00501	2.32337	0.00114885	0.0134601
CAPN1	128.662	137.389	130.052	174.518	236.75	193.618	1.52599	0.609746	0.00114927	0.0134601
ADNP2	35.7714	38.5792	43.3507	24.3413	22.1206	23.5336	-1.6758	-0.74485	0.00114901	0.0134601
RAB3GAP2	95.4867	74.0091	79.7653	56.9412	49.024	52.4159	-1.57413	-0.654552	0.00115417	0.0135057
TPPP	2.88479	4.33032	8.09213	0.869331	2.09249	0	-4.91	-2.29572	0.00116133	0.0135774
AP4M1	10.0968	10.2353	7.51412	14.7786	17.3378	21.3942	1.886	0.915326	0.00116541	0.0136132
MED24	68.3696	67.7104	72.8292	91.4971	117.179	107.328	1.50114	0.586055	0.00116864	0.0136359
DYNLRB1	63.4654	74.0091	58.0899	97.5824	104.027	93.4215	1.52746	0.611135	0.00116941	0.0136359
FER	59.4267	58.6561	62.425	48.2479	29.5938	32.8045	-1.61209	-0.688929	0.00117137	0.0136427
TTLL1	8.65438	6.69231	7.22512	13.04	20.0281	13.9062	2.04141	1.02957	0.00117204	0.0136427
ANAPC15	12.1161	15.7466	11.8492	24.7759	20.327	22.1074	1.74166	0.800462	0.00117463	0.013649
CBR1	61.4461	55.9005	41.0387	75.1971	87.8846	92.7083	1.61187	0.688737	0.00117426	0.013649
TRAFD1	45.5797	48.8145	35.5476	59.5492	85.1942	64.8958	1.61628	0.692677	0.00118637	0.0137733
OXR1	65.1963	58.6561	56.0669	46.9439	31.6863	32.0913	-1.6038	-0.681492	0.00119465	0.0138573
DYNC2I2	13.5585	23.2263	15.6062	31.7306	28.9959	28.5256	1.77029	0.823987	0.00119912	0.013897
RDH10	25.3862	19.6833	20.2303	11.5186	14.9464	9.98397	-1.79963	-0.847699	0.00120194	0.0139175
HSBP1	68.9466	92.1177	45.3737	124.314	114.489	95.2043	1.62567	0.701036	0.00120591	0.0139514
CCN2	297.134	420.828	436.397	808.913	422.683	776.61	1.74	0.799087	0.00121872	0.0140873
TP53BP2	64.9078	74.7964	96.5275	49.3345	49.323	48.4936	-1.60641	-0.683837	0.00121986	0.0140883
ATP6V0E1	53.9456	72.4344	39.8826	92.1491	82.205	93.0649	1.61867	0.694805	0.00122529	0.0141387
RLF	35.7714	27.5566	30.6345	23.2546	11.3592	15.6891	-1.84415	-0.882956	0.00122758	0.0141528
FNDC7	0.576959	2.75566	5.78009	0.217333	0	0	-24.3186	-4.60399	0.00123223	0.0141934
COQ10B	40.0986	31.4932	30.9235	25.2106	12.256	18.5417	-1.81198	-0.857565	0.00123323	0.0141934
NLRX1	13.27	12.5973	13.0052	22.6026	20.626	23.5336	1.70917	0.7733	0.00123619	0.0141977
PKMYT1	11.5392	20.0769	24.8544	9.77998	8.96781	9.98397	-1.95752	-0.969028	0.00123681	0.0141977
AP5S1	14.7124	11.81	13.8722	22.6026	28.3981	21.0377	1.76036	0.815874	0.00123631	0.0141977
TXLNG	19.9051	18.8959	26.0104	14.344	9.86459	9.98397	-1.85898	-0.894508	0.00123903	0.0142109
MED20	17.8857	14.172	10.9822	28.9053	24.512	23.8902	1.81549	0.860356	0.00124356	0.0142505
TMEM156	4.03871	3.14932	4.33507	1.08666	0.597854	0.713141	-4.51121	-2.17352	0.00124658	0.014262
ACTA2	52.7917	38.9729	50.8648	79.5438	65.465	87.3598	1.61354	0.690228	0.00124671	0.014262
COX6B2	0.576959	2.36199	7.22512	0.651998	0	0	-11.864	-3.56852	0.00125057	0.0142939
DUSP1	135.008	162.584	111.556	202.989	203.868	216.438	1.52869	0.612293	0.00125244	0.014303
EDEM1	107.026	120.462	110.689	75.6318	83.9985	63.8261	-1.49814	-0.583168	0.00125713	0.0143443
MAP3K20	162.414	155.104	178.894	123.88	108.212	95.9174	-1.5048	-0.589567	0.00126143	0.0143687
ROMO1	8.3659	28.3439	9.53715	26.7319	43.0455	30.6651	2.19148	1.13191	0.00126054	0.0143687
ZBED6	127.508	83.8507	136.41	84.3251	75.3296	62.7564	-1.5631	-0.644408	0.00126732	0.0144233
INHBA	171.357	152.348	210.395	113.882	139.599	90.5689	-1.55197	-0.634096	0.00127711	0.0145223
CENPK	21.059	21.2579	19.9413	14.5613	6.87532	9.98397	-1.92204	-0.942639	0.00128109	0.0145552
ASAP1	161.548	170.457	247.388	136.92	108.511	130.861	-1.54006	-0.622987	0.00128666	0.0145857
ASB13	6.05807	2.75566	4.33507	10.432	10.7614	9.6274	2.2636	1.17862	0.00128707	0.0145857
FLCN	55.965	57.8688	72.2512	34.9906	46.3337	37.0833	-1.58102	-0.660854	0.00128633	0.0145857
EPB41	12.4046	21.2579	15.6062	7.17198	10.1635	6.41827	-2.03594	-1.02569	0.00129442	0.014637
CCNG2	64.6194	68.8914	52.8878	47.8132	34.0777	32.8045	-1.60151	-0.679429	0.00129529	0.014637
HRCT1	1.73088	1.96833	0.289005	3.47732	5.97854	6.77484	4.02225	2.008	0.001296	0.014637
MRPL27	20.1936	20.8643	9.24815	25.8626	34.6755	35.657	1.91627	0.938303	0.00129449	0.014637
NCOA6	105.006	109.439	175.715	83.6731	83.1017	82.0112	-1.56994	-0.65071	0.00130667	0.014745
TMEM98	45.8682	60.6245	39.3046	77.1531	71.7425	84.5072	1.6142	0.690823	0.00131297	0.0148035
COPS9	11.2507	31.4932	12.1382	34.3386	32.882	39.2227	1.9598	0.970705	0.00133897	0.0150838
RNF150	10.9622	12.991	11.8492	39.7719	8.66889	35.657	2.35055	1.233	0.00134605	0.0151428
GM2A	33.4636	31.0996	24.2764	44.5532	54.1058	44.5713	1.61407	0.690702	0.00134737	0.0151428
PIK3C2A	87.9862	89.362	112.423	73.2412	53.8069	56.6947	-1.56893	-0.649783	0.00134763	0.0151428
KTN1	287.037	260.606	368.481	229.286	148.866	198.61	-1.58784	-0.667061	0.0013501	0.0151578
IKZF5	19.3281	18.1086	25.4324	13.04	9.56567	11.0537	-1.85406	-0.890686	0.00136056	0.0152367
PHB	76.447	97.629	73.6962	104.102	153.649	123.73	1.54201	0.624809	0.00136005	0.0152367
ZNF331	47.8876	52.3575	84.3893	42.1626	26.6045	39.5793	-1.70356	-0.768557	0.00135935	0.0152367
TENT5C	3.17327	5.11765	5.78009	1.08666	1.19571	1.06971	-4.06151	-2.02201	0.0013618	0.0152377
SLFN5	220.398	188.959	168.49	136.05	112.397	134.784	-1.50725	-0.591921	0.0013672	0.0152853
CD2AP	32.3097	33.0679	36.4146	19.7773	20.626	22.1074	-1.64463	-0.717766	0.00137154	0.015321
HGF	49.33	27.9502	34.9696	27.3839	14.3485	17.8285	-1.8726	-0.90504	0.00138078	0.0153804
FAM53B	25.3862	23.6199	32.3685	15.2133	18.2346	12.8365	-1.76228	-0.817446	0.00138205	0.0153804
CEP290	66.0618	51.5702	48.8418	45.2052	21.2238	29.2388	-1.72826	-0.789321	0.00138265	0.0153804
TOGARAM1	32.3097	29.9186	36.9926	21.2986	17.0388	21.3942	-1.66733	-0.737539	0.00137868	0.0153804
HCFC1R1	16.4433	14.172	13.8722	24.9933	26.3056	27.0994	1.74195	0.800707	0.00138136	0.0153804
DCP1A	43.8489	42.5159	57.8009	32.5999	30.1916	26.3862	-1.60962	-0.686723	0.0013938	0.0154914
LDB1	115.392	101.959	107.221	139.745	188.025	162.953	1.50501	0.589778	0.00139496	0.0154914
TNXB	1.15392	7.08598	7.51412	1.08666	1.19571	0.713141	-5.00099	-2.32221	0.0013982	0.0155144
TTC37	192.704	165.339	206.349	146.917	100.44	124.8	-1.51476	-0.599085	0.00140061	0.0155152
KLF16	40.0986	48.4208	61.269	24.5586	35.5723	30.6651	-1.66056	-0.731669	0.00139965	0.0155152
gene:ENSG00000286905	3.46175	1.96833	0.867014	6.51998	7.7721	5.70513	3.13309	1.64759	0.00140291	0.015522
PDIA4	482.049	524.362	456.049	286.662	311.781	345.16	-1.55253	-0.634621	0.00140355	0.015522
KDR	7.78894	7.47964	8.38113	1.956	4.78283	2.13942	-2.72364	-1.44554	0.00140496	0.0155246
AAR2	23.0783	24.8009	21.0973	33.9039	43.0455	39.5793	1.67731	0.74615	0.00140949	0.0155617
C2CD2L	23.6553	32.2806	39.8826	14.1266	22.1206	16.0457	-1.83935	-0.879193	0.00141985	0.0156631
PDLIM7	122.604	152.742	156.062	203.206	226.886	222.143	1.51235	0.596796	0.00142123	0.0156653
LAMTOR2	10.3853	18.1086	8.09213	19.1253	26.3056	22.4639	1.88677	0.91592	0.00142956	0.0157441
FAM76B	17.8857	15.7466	16.1843	9.56264	9.86459	7.13141	-1.84684	-0.885058	0.00144296	0.0158785
TADA2B	31.4442	34.2489	35.5476	18.908	22.4195	20.6811	-1.64439	-0.717549	0.00145218	0.0159668
NDUFS7	15.0009	27.5566	19.6523	26.0799	50.5187	39.9359	1.87862	0.909671	0.00145572	0.0159925
C12orf75	72.4083	89.7557	80.3433	118.881	120.169	116.242	1.4794	0.565011	0.00145833	0.0160079
RSL24D1	69.235	70.4661	49.9978	41.9452	43.9423	32.0913	-1.59272	-0.671491	0.00146116	0.0160258
PMF1	17.5972	28.3439	20.2303	30.2093	44.8391	42.0753	1.77747	0.829823	0.00147689	0.0161849
PLAGL1	47.8876	48.0272	56.3559	33.9039	26.3056	34.5873	-1.60786	-0.685138	0.00147835	0.0161876
CCDC167	5.76959	11.4163	3.46806	16.0826	17.9356	11.4103	2.26368	1.17867	0.00149232	0.0163002
ZNF32	20.1936	19.2896	11.2712	32.1653	26.0067	31.3782	1.78014	0.831988	0.00149073	0.0163002
CSRNP2	65.7733	66.1358	72.8292	46.2919	45.7358	41.0056	-1.53056	-0.61406	0.00149145	0.0163002
EPPK1	1.4424	1.57466	5.20208	0	0	0.713141	-12.0931	-3.59611	0.00149843	0.0163536
NDRG3	38.0793	28.7376	36.1256	57.5932	51.4155	52.7724	1.56007	0.641615	0.00150033	0.0163608
KIAA0930	43.2719	49.2082	47.1078	75.6318	63.3725	73.8101	1.53828	0.621319	0.00150236	0.0163696
ADGRE5	37.5023	25.5882	31.5015	16.952	20.9249	16.7588	-1.75517	-0.811607	0.00151516	0.0164955
ITGA4	62.8885	51.1765	64.448	39.5546	42.4476	32.8045	-1.55597	-0.637818	0.00152412	0.0165795
S100A13	42.4065	74.7964	32.0795	70.4158	101.336	90.5689	1.76338	0.818347	0.00152952	0.0166115
ARHGAP21	318.481	296.824	440.443	235.154	220.01	228.562	-1.54517	-0.627768	0.00152957	0.0166115
NOP58	55.388	77.1584	69.0721	49.5519	37.9637	38.5096	-1.57875	-0.658781	0.00153449	0.0166514
P4HA1	141.355	146.837	143.924	105.624	98.0481	81.2981	-1.49679	-0.581867	0.00153747	0.0166702
SMOX	26.5401	35.0362	31.5015	12.1706	22.4195	17.8285	-1.79132	-0.841024	0.00155562	0.0168532
HIPK1	92.3134	103.534	132.942	73.8932	72.9382	70.9575	-1.51	-0.59455	0.00155858	0.0168683
TNPO1	444.258	440.118	469.921	362.728	220.01	268.854	-1.58815	-0.667351	0.00155956	0.0168683
MRPL41	17.0203	24.8009	11.5602	25.2106	43.6434	32.0913	1.90317	0.928407	0.00156409	0.0169036
ANKRD13C	37.5023	39.7602	49.1308	26.0799	25.7077	25.3165	-1.64217	-0.715601	0.00156643	0.0169152
NDUFS4	29.7134	34.2489	22.5424	48.8999	42.7466	47.4239	1.63663	0.710726	0.00157058	0.0169462
ANKRD39	4.03871	4.33032	3.75706	6.95465	11.3592	11.7668	2.40697	1.26722	0.00157461	0.0169484
MRPL22	14.7124	16.5339	8.09213	21.9506	22.4195	25.3165	1.791	0.840767	0.00157239	0.0169484
ATE1	34.6175	36.6109	32.6575	23.0373	20.327	19.9679	-1.61097	-0.687932	0.00157426	0.0169484
gene:ENSG00000254692	21.059	21.2579	20.2303	12.6053	9.86459	0	-2.75618	-1.46267	0.0015792	0.0169566
FLYWCH2	10.6737	14.172	8.67014	18.908	22.7185	19.2548	1.85179	0.888922	0.00157854	0.0169566
SOCS7	47.5991	49.9955	59.824	32.1653	37.6648	29.9519	-1.57988	-0.659815	0.00157684	0.0169566
MRPL52	24.8092	29.1312	19.0743	30.6439	65.764	37.7965	1.84004	0.87974	0.00158438	0.0169985
APOBEC3C	78.7549	49.2082	46.8187	91.9318	99.8417	87.7163	1.59426	0.672887	0.00160082	0.0171611
GEMIN5	16.7318	22.0453	19.3633	32.3826	31.6863	32.8045	1.6857	0.753351	0.00160778	0.0172217
ZNHIT1	23.9438	42.9095	22.8314	40.4239	57.6929	57.7644	1.74737	0.805188	0.00161176	0.0172289
TPP2	86.5438	96.448	85.5454	68.8945	50.2198	52.4159	-1.54445	-0.627091	0.00161007	0.0172289
SNX5	83.082	86.6064	83.8113	60.8532	52.3122	47.4239	-1.54712	-0.629587	0.00161234	0.0172289
SEC24D	355.983	400.358	466.164	264.059	253.49	277.412	-1.53882	-0.621824	0.00161909	0.0172872
ANGPTL4	158.664	199.982	182.073	240.587	313.873	272.063	1.5296	0.613153	0.00162862	0.017375
NBPF19	47.5991	35.0362	59.5349	28.6879	30.7895	27.4559	-1.64591	-0.718889	0.00163286	0.0174062
ELK3	142.797	140.145	195.367	94.9744	127.044	88.0729	-1.54363	-0.626329	0.00163567	0.0174222
ZNF841	35.1945	31.0996	31.7905	21.2986	13.1528	21.3942	-1.75021	-0.807525	0.00163941	0.0174481
URM1	32.5982	42.5159	34.6806	50.2039	64.8672	55.625	1.56172	0.643139	0.00164122	0.0174534
FDFT1	95.4867	118.493	73.9852	126.053	205.363	130.505	1.60639	0.683825	0.00164425	0.0174716
CCDC186	27.4055	32.2806	33.2355	20.8639	12.8539	18.8982	-1.73971	-0.798844	0.0016485	0.0175029
CLIC4	501.377	562.548	520.497	420.756	246.017	323.409	-1.59824	-0.676486	0.00165162	0.017522
NRCAM	291.653	221.24	298.831	206.683	127.941	180.425	-1.5757	-0.655996	0.00165575	0.0175518
HTATIP2	47.5991	38.1855	23.9874	62.3745	57.394	59.1907	1.63248	0.707067	0.00165984	0.0175811
ID3	76.1585	154.71	114.446	178.648	176.965	188.626	1.57972	0.659666	0.00166266	0.0175969
CERS6	75.2931	74.0091	77.7422	62.5918	21.8217	42.7885	-1.77808	-0.830317	0.00166482	0.0176058
BTAF1	113.661	90.9367	126.295	79.1091	63.0736	77.7324	-1.50867	-0.593276	0.00166706	0.0176154
RBM15	19.0396	13.7783	24.5654	10.8666	11.3592	8.55769	-1.86972	-0.902821	0.00167901	0.0177138
MRPL10	30.5788	31.8869	26.5884	42.5972	50.2198	49.5633	1.58948	0.668555	0.00167903	0.0177138
MYCBP2	148.567	145.656	217.62	120.62	101.635	113.033	-1.5273	-0.610979	0.00168183	0.0177152
COLGALT1	135.585	109.833	145.369	174.084	209.548	205.028	1.49689	0.58197	0.00168091	0.0177152
TIMM50	37.5023	42.1222	39.3046	54.1159	71.7425	58.8341	1.5509	0.633105	0.00168409	0.0177249
RAMP1	1.73088	3.14932	3.17905	6.95465	5.38069	10.6971	2.81471	1.49299	0.0016876	0.0177478
TDRKH	2.88479	1.181	2.02303	7.60665	5.67962	5.34856	3.00167	1.58577	0.00169474	0.0177853
UBXN7	126.354	124.792	135.543	96.0611	83.4007	80.2283	-1.47395	-0.559692	0.00169518	0.0177853
CDT1	24.2323	29.1312	39.8826	13.692	21.5228	17.1154	-1.79697	-0.845565	0.00169375	0.0177853
RAB1B	125.489	157.072	136.41	182.342	248.109	203.602	1.5149	0.59922	0.00170832	0.017909
UXT	17.5972	36.6109	18.7853	36.9466	53.209	41.7187	1.82238	0.865821	0.00171114	0.0179245
NUP98	140.778	164.552	215.019	113.013	109.407	121.234	-1.51598	-0.600247	0.00171599	0.0179612
TTI1	24.8092	18.5023	15.0282	34.5559	31.3873	32.8045	1.69099	0.757865	0.00171966	0.0179854
AURKAIP1	41.541	53.1448	34.6806	57.8105	80.1125	67.3918	1.5938	0.672467	0.00172893	0.0180539
STPG1	15.0009	18.1086	10.6932	23.6893	28.3981	24.9599	1.78501	0.835934	0.00172763	0.0180539
THBD	4.90415	3.14932	2.31204	0	1.19571	0.713141	-5.83629	-2.54505	0.00173085	0.0180598
WHAMM	16.1548	22.8326	28.3225	11.736	11.3592	14.2628	-1.812	-0.857584	0.00173393	0.0180778
CREBBP	153.759	180.299	313.281	124.966	139.898	134.784	-1.62091	-0.696805	0.00173821	0.0181082
STX2	66.3502	73.2218	84.3893	54.1159	42.1487	46.7107	-1.55541	-0.637291	0.00174122	0.0181253
LRRC41	114.238	111.801	95.0825	153.002	160.823	159.03	1.47372	0.559461	0.00175817	0.0182874
SCML1	12.9816	11.81	24.2764	9.56264	6.27747	7.48798	-2.09241	-1.06517	0.00176004	0.0182926
IPMK	14.424	12.991	15.6062	9.56264	4.48391	4.99199	-2.15823	-1.10985	0.00176312	0.0183103
CCNT2	37.5023	40.5475	46.2407	27.8186	23.3163	24.2468	-1.62971	-0.704612	0.00177082	0.0183759
S100A10	147.413	227.932	207.794	262.973	321.048	321.983	1.55463	0.636573	0.00177529	0.0183893
CDV3	202.224	218.484	222.245	159.305	121.962	146.55	-1.49767	-0.582716	0.00177765	0.0183893
PHF19	43.2719	52.7512	50.8648	74.3278	69.65	85.5769	1.56174	0.643157	0.00177661	0.0183893
DOT1L	81.6396	85.0317	143.346	52.5945	74.4328	65.2524	-1.61697	-0.69329	0.00177699	0.0183893
AGTRAP	25.0977	27.1629	17.0513	36.9466	37.6648	42.4319	1.69893	0.764629	0.00177997	0.0183901
AGTPBP1	16.4433	19.2896	18.4963	11.9533	7.7721	9.27083	-1.80384	-0.851071	0.00178049	0.0183901
GMPPB	50.1954	69.2851	81.2103	42.1626	43.3444	41.3622	-1.57944	-0.65941	0.00179382	0.0184991
SNX9	182.319	186.991	224.268	119.316	140.197	139.062	-1.49651	-0.5816	0.00179339	0.0184991
SWAP70	58.5613	59.8371	66.4711	42.3799	42.7466	34.2308	-1.53227	-0.615669	0.00180081	0.0185567
MIS12	28.271	43.6969	30.0565	21.2986	16.441	21.3942	-1.70178	-0.767047	0.00181019	0.0186389
PHF10	43.2719	50.7828	50.8648	38.0332	25.4088	24.2468	-1.62323	-0.698865	0.00181369	0.0186451
CEP57	50.1954	46.4525	40.4606	33.2519	20.9249	28.8822	-1.63493	-0.709227	0.0018133	0.0186451
HMGB3	31.4442	31.0996	29.7675	50.8559	43.0455	49.5633	1.56199	0.643388	0.00181499	0.0186451
TENT5A	43.8489	44.0905	38.4376	20.4293	34.0777	18.8982	-1.72008	-0.782474	0.00181782	0.0186597
INO80B	8.07742	3.54299	6.0691	14.1266	13.4517	11.7668	2.16412	1.11378	0.00182646	0.0187339
ABHD3	9.8083	11.4163	13.2942	5.65065	4.48391	6.41827	-2.09041	-1.06378	0.00182853	0.0187407
COG4	60.5807	55.9005	56.0669	86.2811	91.7706	81.6546	1.50434	0.589134	0.00183599	0.0188026
TENT4B	29.7134	26.3756	35.2586	17.3866	21.5228	13.5497	-1.73975	-0.798878	0.00183907	0.0188196
KAT6B	82.2166	75.9774	105.776	56.0719	55.3015	61.6867	-1.53582	-0.619007	0.00185109	0.0189212
TNKS2	123.469	117.312	128.318	98.0171	69.65	79.5152	-1.48491	-0.570379	0.00185183	0.0189212
TMEM177	2.01936	2.36199	1.44502	3.91199	8.36996	6.41827	3.14622	1.65362	0.00185645	0.0189538
H2AJ	17.8857	20.0769	14.7392	28.4706	25.7077	37.7965	1.74172	0.800511	0.0018627	0.019003
ZFAND3	92.6019	91.724	107.51	61.2878	67.2586	67.7484	-1.50392	-0.588723	0.00186899	0.0190379
MKS1	9.8083	9.44797	3.75706	15.648	16.7399	14.2628	2.05906	1.04199	0.00186778	0.0190379
ADAM17	59.7152	68.1041	41.9057	35.2079	33.1809	38.153	-1.58641	-0.665763	0.00187497	0.0190842
FAM168B	197.897	212.579	243.92	151.698	140.795	146.55	-1.48953	-0.574854	0.0018822	0.0191431
RABEP1	87.6977	70.4661	102.597	58.0279	52.3122	60.2604	-1.53756	-0.620646	0.00189216	0.0192298
ACTR1A	160.106	161.403	146.525	213.203	257.077	231.414	1.49765	0.582704	0.00189944	0.0192889
ID1	55.0995	80.3077	58.3789	108.884	83.6996	104.832	1.54554	0.628115	0.00190133	0.0192934
ZEB1	124.046	116.919	149.415	98.6691	68.1554	91.6386	-1.50965	-0.59421	0.0019041	0.0193067
EPHA4	16.1548	10.629	13.2942	6.95465	6.5764	6.0617	-2.05635	-1.04009	0.00191529	0.0194055
C2orf68	21.059	14.9593	15.6062	34.1212	24.512	31.7348	1.74313	0.801678	0.00191989	0.0194372
RPS6KC1	63.177	54.3258	55.7779	38.6852	37.067	39.2227	-1.51437	-0.59872	0.00193561	0.0195765
TACO1	13.5585	14.5656	7.51412	18.6906	23.0174	22.8205	1.82013	0.864043	0.00193659	0.0195765
VPS18	30.0018	28.3439	28.6115	45.8572	42.4476	49.2067	1.57231	0.652886	0.00194036	0.0195997
TOB2	103.564	105.109	124.272	74.5452	73.5361	80.5849	-1.46613	-0.552012	0.00194956	0.0196777
TTC5	15.2894	13.3846	10.4042	21.7333	22.1206	22.8205	1.70223	0.767428	0.00195457	0.0197132
AGO3	32.3097	32.2806	34.6806	20.212	22.4195	17.8285	-1.63472	-0.709042	0.00195689	0.0197217
PPL	1.4424	1.96833	0.289005	6.30265	1.79356	7.84455	4.34427	2.11911	0.00196036	0.0197417
PIN1	28.271	39.3665	21.6753	41.9452	59.1876	47.0673	1.67071	0.740459	0.00196589	0.0197824
UQCRH	56.8304	94.4797	50.8648	96.7131	127.941	95.2043	1.58865	0.667797	0.00197718	0.019881
TOX	4.90415	5.90498	5.78009	16.0826	11.0603	8.55769	2.21509	1.14737	0.00198151	0.0199095
PGAP4	30.8673	35.0362	30.3455	49.9865	47.8283	51.7027	1.56354	0.644815	0.00198577	0.0199349
UPF3B	19.6166	16.9276	27.1664	13.9093	9.86459	10.6971	-1.83456	-0.875436	0.00198704	0.0199349
GSPT1	175.107	205.887	247.099	159.088	105.521	144.054	-1.53534	-0.618561	0.00199376	0.0199872
MAP2	36.3484	29.1312	39.5936	26.2973	17.9356	19.2548	-1.63907	-0.712879	0.00200455	0.0200802
ZC3HC1	12.6931	11.81	9.24815	19.9946	19.4303	21.0377	1.79184	0.841441	0.0020069	0.0200886
FAM133B	23.9438	25.5882	26.2994	18.256	10.4624	12.48	-1.7848	-0.83576	0.00200985	0.0201031
HMCES	13.27	14.172	15.6062	20.6466	30.4906	25.6731	1.75841	0.814269	0.00202293	0.0202035
PTGR1	93.4673	105.896	95.9495	139.962	151.556	141.202	1.47166	0.557447	0.00202228	0.0202035
MVB12A	9.51982	16.5339	13.2942	19.9946	28.3981	20.3245	1.76719	0.821456	0.00202645	0.0202104
SMIM26	7.21198	14.5656	6.0691	17.3866	17.3378	16.7588	1.91418	0.936726	0.00202666	0.0202104
FLAD1	17.8857	19.2896	15.3172	26.5146	33.4798	28.1691	1.68026	0.748686	0.00204029	0.0203172
RUVBL2	53.3687	60.6245	41.0387	74.5452	83.4007	80.9415	1.54992	0.632191	0.00204043	0.0203172
COL21A1	4.03871	3.14932	3.75706	0.869331	1.19571	0.35657	-4.26957	-2.09409	0.00204714	0.0203688
SCAF4	50.4839	51.5702	98.8396	39.9892	42.7466	36.7268	-1.68345	-0.751424	0.0020559	0.0204406
PCGF5	44.1373	44.4842	53.7549	33.4693	28.3981	28.1691	-1.56618	-0.647248	0.00205914	0.0204575
SLC30A1	34.0406	32.6742	28.9005	22.8199	17.0388	13.1931	-1.74866	-0.80625	0.00206334	0.0204687
ATP11B	89.7171	82.6697	86.4124	69.1118	39.4584	53.4856	-1.58857	-0.66773	0.00206324	0.0204687
BAZ1B	197.608	215.335	310.391	159.957	156.638	154.752	-1.53526	-0.618484	0.00206581	0.0204779
OST4	64.6194	122.036	66.4711	125.401	144.382	129.435	1.58295	0.662618	0.00207164	0.0205203
RBM8A	73.5622	69.2851	64.159	95.4091	113.293	95.9174	1.46887	0.554705	0.002079	0.020541
POM121C	93.7558	86.6064	129.763	68.8945	77.1232	58.121	-1.51968	-0.603764	0.00207991	0.020541
EMP1	290.21	334.222	367.614	234.502	193.107	227.849	-1.51219	-0.596636	0.00207851	0.020541
MIB1	111.93	93.6924	105.776	76.7185	68.4543	67.0352	-1.46359	-0.549508	0.0020788	0.020541
SH2B3	69.812	67.3168	71.0951	46.5092	41.2519	50.2764	-1.51648	-0.600729	0.00208432	0.0205694
VPS72	25.0977	24.0136	18.4963	37.8159	40.3552	33.161	1.66679	0.737076	0.00208922	0.0206024
ATP13A2	23.9438	28.3439	28.0334	41.2932	40.6541	46.3542	1.59356	0.672252	0.00210272	0.0207047
FZD8	6.34654	14.9593	24.2764	6.73732	8.07103	2.85256	-2.54694	-1.34877	0.00210151	0.0207047
GPR39	1.73088	1.57466	2.89005	6.08532	8.07103	4.63542	2.96008	1.56564	0.00211518	0.020812
SMARCA5	162.702	138.177	157.219	119.098	91.7706	96.274	-1.48603	-0.571462	0.00211784	0.0208228
AVIL	4.90415	7.87331	9.82616	1.52133	3.2882	3.5657	-2.80238	-1.48666	0.00212338	0.0208618
TMA7	57.4074	87.3937	44.2177	89.9758	109.407	101.623	1.59903	0.677196	0.00212674	0.0208794
SLX4	15.2894	14.9593	21.3863	28.4706	29.8927	29.2388	1.67051	0.740284	0.00213194	0.020915
ST6GALNAC3	14.1355	15.3529	6.0691	5.21599	6.87532	2.49599	-2.37912	-1.25043	0.00213352	0.0209151
TECR	40.6756	61.4118	39.8826	68.0252	78.6178	73.8101	1.56599	0.647078	0.00214017	0.0209648
DMXL1	64.3309	53.5385	53.1768	43.2492	28.9959	36.7268	-1.55969	-0.641261	0.00214553	0.0210019
SNRNP25	13.5585	17.3213	10.1152	19.56	26.9034	26.0296	1.77657	0.829098	0.00215166	0.0210463
FBXO11	86.8323	75.1901	89.0134	67.1558	39.4584	50.633	-1.58887	-0.668001	0.0021567	0.0210801
GBP1	16.1548	15.7466	10.4042	22.6026	25.7077	26.3862	1.7605	0.815985	0.00217088	0.0212032
EXTL3	62.3115	54.7195	52.3098	84.5425	84.5964	90.2123	1.52155	0.605541	0.00217397	0.0212178
CCDC51	4.90415	4.33032	5.49109	7.82398	12.8539	12.48	2.16017	1.11115	0.00217652	0.021227
PET100	9.51982	16.1403	7.51412	14.5613	31.9852	19.9679	2.01966	1.01411	0.00218443	0.0212886
TMEM102	1.73088	2.36199	1.15602	4.12932	5.38069	7.84455	3.22019	1.68715	0.0021933	0.0213594
SELENOS	69.5235	94.8733	66.1821	45.4226	45.7358	54.9118	-1.57562	-0.655921	0.00219522	0.0213624
SCD	495.031	722.376	597.662	365.988	421.188	384.383	-1.54835	-0.630735	0.00219718	0.0213659
LRIG2	16.1548	16.1403	16.4733	9.34531	10.1635	7.13141	-1.80034	-0.848266	0.00220435	0.0214199
PHLPP1	12.6931	13.3846	15.3172	7.17198	6.87532	6.77484	-1.97833	-0.984285	0.00220672	0.0214273
OTUB1	62.6	68.4978	45.0847	80.1958	109.108	85.2203	1.56219	0.643569	0.00222539	0.0215928
GNA13	102.699	96.0543	96.5275	79.3265	50.5187	61.6867	-1.53202	-0.615432	0.00224724	0.0217889
CDC14A	5.76959	7.47964	6.64711	2.39066	2.39142	2.49599	-2.68241	-1.42353	0.0022491	0.021791
PEX10	16.4433	10.629	15.3172	24.7759	26.6045	23.8902	1.73516	0.795068	0.00225298	0.0217939
DENND4A	55.965	34.2489	34.6806	29.1226	14.9464	24.6034	-1.81417	-0.859312	0.00225341	0.0217939
NDUFA1	16.7318	34.6426	19.0743	35.4252	53.508	37.7965	1.81434	0.859443	0.00225432	0.0217939
CDPF1	3.75023	2.75566	2.60104	7.82398	6.5764	8.91426	2.50282	1.32355	0.00227172	0.0219462
NDUFA7	8.94286	20.8643	8.67014	18.256	32.2841	24.2468	1.96463	0.974254	0.00228269	0.0220362
NR1D1	16.1548	17.3213	22.8314	4.99865	15.2453	8.20112	-1.99905	-0.999318	0.00228813	0.0220726
IFI27L2	9.23134	14.172	4.91308	17.3866	22.1206	14.976	1.96224	0.972503	0.00229231	0.022097
MYO18A	109.622	72.4344	99.1286	121.054	181.15	133.357	1.54346	0.62617	0.00229585	0.022115
DUSP23	1.15392	3.54299	2.02303	6.08532	6.5764	6.0617	2.91587	1.54393	0.00229792	0.022118
SCO2	4.90415	5.11765	4.04606	8.04131	8.07103	17.1154	2.31674	1.2121	0.00229948	0.022118
TXN	180.588	260.213	155.195	314.698	288.764	319.487	1.55188	0.634019	0.0023123	0.0222252
NDUFB1	4.90415	15.7466	8.38113	18.6906	18.2346	18.8982	1.96529	0.974745	0.00231847	0.0222605
MAP1LC3B	158.952	150.774	199.413	119.316	121.065	103.762	-1.4791	-0.564723	0.00231933	0.0222605
ATP6V1F	44.1373	49.9955	27.4554	53.0292	75.9275	68.105	1.62389	0.699452	0.00232857	0.0223195
REXO1	55.0995	55.1131	88.7244	37.8159	44.8391	42.7885	-1.5936	-0.672291	0.00232883	0.0223195
DCPS	18.7512	14.172	12.1382	21.9506	32.5831	26.3862	1.7756	0.828305	0.00233564	0.0223525
MXRA7	144.817	169.276	152.305	214.29	232.565	242.468	1.47878	0.56441	0.00233556	0.0223525
LMTK2	29.4249	33.8552	56.9339	20.6466	27.5013	19.2548	-1.78604	-0.836762	0.00234777	0.0224525
MYLK	376.466	193.683	245.943	461.615	384.42	471.03	1.61237	0.689183	0.00235891	0.0225428
NDUFB2	24.2323	41.7285	17.9183	42.5972	50.2198	50.9896	1.72777	0.788912	0.00236568	0.022575
FRMD3	2.30783	2.75566	9.53715	1.304	1.49464	0	-4.87392	-2.28508	0.00236452	0.022575
POLR2J	20.1936	29.9186	22.2534	40.4239	37.067	40.2925	1.66617	0.736532	0.00237616	0.0226588
MEAK7	32.3097	25.5882	17.0513	36.7292	45.138	47.0673	1.7135	0.77695	0.00237847	0.0226645
OSTM1	29.7134	27.5566	27.4554	18.6906	15.5442	17.8285	-1.61817	-0.694365	0.00238831	0.0227419
MRPL23	17.8857	40.5475	16.4733	38.6852	58.8886	40.2925	1.85392	0.890581	0.00239177	0.0227586
IMP3	20.482	20.4706	11.8492	27.3839	36.768	28.1691	1.75725	0.813323	0.00239382	0.0227619
BIRC2	121.161	94.8733	97.9726	90.6278	43.3444	62.7564	-1.59136	-0.670261	0.00239608	0.022767
NUCB2	98.6599	102.747	97.6836	84.7598	36.4691	59.5473	-1.64822	-0.720907	0.00240516	0.0228272
SLC7A5	310.981	285.014	367.036	158.218	273.219	180.425	-1.57531	-0.655639	0.00240585	0.0228272
LRIF1	25.3862	33.0679	30.0565	21.2986	14.9464	14.6194	-1.6843	-0.752148	0.00242283	0.022972
CCDC88A	119.142	99.2037	116.758	97.5824	55.3015	63.4695	-1.54263	-0.625391	0.00242575	0.0229833
MIF	107.026	254.701	120.804	242.761	304.308	278.838	1.71387	0.777261	0.00244233	0.0231238
ANXA2	1648.66	1823.46	1713.22	2408.7	2782.71	2680.7	1.51817	0.602335	0.00245181	0.0231971
ACSL3	191.55	168.095	167.334	142.136	110.005	102.692	-1.47785	-0.563504	0.0024599	0.0232571
CASP8AP2	26.5401	24.4073	25.7214	17.8213	11.9571	13.9062	-1.71445	-0.77775	0.00247287	0.0233465
FANCA	35.483	35.0362	44.5067	24.5586	21.5228	24.2468	-1.64119	-0.714741	0.00247253	0.0233465
TSLP	4.61567	4.72398	1.73403	0.869331	0.597854	0.713141	-4.69101	-2.2299	0.00247477	0.0233478
CLPP	34.0406	35.4299	29.1895	48.2479	60.0843	45.641	1.56837	0.649267	0.0024812	0.0233919
EIF3I	150.586	176.756	146.236	202.12	301.617	216.082	1.521	0.605022	0.00248524	0.0234134
KDM2A	146.259	157.86	239.296	115.404	125.549	119.451	-1.50955	-0.594115	0.00248828	0.0234254
PFN1	465.894	701.118	484.372	727.63	982.573	880.372	1.56944	0.650248	0.00249918	0.0235114
SBDS	87.6977	95.6607	95.6605	69.7638	53.209	61.6867	-1.49465	-0.579803	0.00250948	0.0235916
MRPS12	11.8277	21.6516	11.5602	23.4719	27.2024	29.2388	1.80306	0.850451	0.00251721	0.0236475
AZI2	73.8507	54.3258	55.1999	46.0746	35.2734	36.7268	-1.54576	-0.628318	0.00253087	0.0237591
ZNF800	25.0977	22.4389	23.1204	19.56	8.96781	9.6274	-1.80995	-0.855953	0.00253427	0.0237613
DPP3	51.9263	40.1539	48.8418	62.8092	89.9771	65.609	1.53956	0.622517	0.00253468	0.0237613
AP2S1	61.7346	98.0227	52.0208	101.277	127.343	100.909	1.5626	0.643949	0.0025374	0.0237701
LTN1	74.7161	55.5068	54.3329	51.0732	27.5013	33.8742	-1.63141	-0.706115	0.00255043	0.0238753
NUP153	116.546	110.62	147.681	92.5838	71.7425	88.786	-1.48186	-0.56741	0.0025538	0.02389
IAH1	38.6562	32.2806	22.2534	49.5519	50.5187	50.2764	1.61472	0.691284	0.00255595	0.0238933
STK17A	78.7549	70.0724	54.9109	54.1159	38.5616	34.9439	-1.58176	-0.661527	0.0025592	0.0239068
MGARP	2.88479	3.14932	2.31204	6.51998	5.97854	9.6274	2.58824	1.37197	0.00256591	0.023935
OPTN	104.43	118.1	133.52	72.8065	95.3577	73.4535	-1.47512	-0.560828	0.00256506	0.023935
IFIT5	16.7318	14.9593	9.82616	29.3399	18.8324	26.0296	1.80135	0.849077	0.00256761	0.023935
TRIM68	10.0968	8.26697	10.1152	17.3866	16.7399	15.6891	1.73874	0.798039	0.002572	0.0239591
USP24	139.624	149.986	191.321	112.361	101.336	112.676	-1.47487	-0.560589	0.00257723	0.023991
DUSP18	6.63502	4.72398	7.80312	12.8226	13.1528	13.9062	2.01263	1.00908	0.00258757	0.0240704
HDAC9	13.27	13.3846	10.6932	6.95465	5.67962	4.63542	-2.07127	-1.05052	0.00261457	0.0243045
GSK3B	101.545	102.353	128.607	81.7171	80.4114	61.6867	-1.47985	-0.565446	0.00262822	0.0244144
TFRC	287.614	341.702	384.087	231.459	241.234	202.175	-1.49958	-0.584555	0.00263303	0.024429
GET3	38.9447	38.9729	38.1486	51.0732	67.8565	58.4775	1.51705	0.601269	0.00263348	0.024429
GPX1	90.0055	144.869	69.0721	134.746	226.587	142.628	1.66074	0.731822	0.00264282	0.0244986
FAM174C	13.27	20.4706	12.1382	23.0373	26.6045	30.3085	1.76152	0.816823	0.00265855	0.0246272
CEP120	47.0221	32.2806	44.5067	24.7759	24.8109	28.1691	-1.62262	-0.698327	0.00266275	0.024649
PPP4R3B	98.3714	84.2444	93.0595	77.3705	43.6434	54.1987	-1.56557	-0.646685	0.00267436	0.0247049
USP49	16.7318	11.4163	12.4272	7.60665	7.17425	4.63542	-2.04526	-1.03229	0.00267273	0.0247049
TMCC3	4.90415	3.14932	6.64711	0.869331	2.39142	1.06971	-3.53928	-1.82346	0.00267396	0.0247049
STX16-NPEPL1	5.48111	5.11765	9.82616	0	3.2882	2.49599	-3.60903	-1.85161	0.00268032	0.0247427
ANKHD1-EIF4EBP3	90.5825	42.9095	122.538	50.2039	53.209	41.3622	-1.77026	-0.823963	0.00268531	0.0247716
PLIN3	111.93	134.24	115.313	154.524	200.281	173.65	1.46353	0.549451	0.0027	0.0248898
AHNAK2	120.584	97.629	160.687	146.482	260.366	190.409	1.57308	0.653593	0.00270596	0.0249102
GABARAP	122.604	135.027	101.152	148.656	210.445	173.65	1.48576	0.571201	0.00270588	0.0249102
MAMLD1	6.05807	10.629	17.0513	3.69466	6.87532	3.5657	-2.38512	-1.25406	0.00271878	0.0250109
ENC1	21.6359	43.6969	30.0565	24.7759	8.07103	14.2628	-2.00018	-1.00013	0.00272114	0.0250152
GSTK1	53.9456	44.4842	40.7496	59.9839	75.6286	79.1586	1.52973	0.613273	0.0027298	0.0250776
TBCB	43.2719	68.8914	55.1999	79.1091	99.2438	79.8718	1.55142	0.63359	0.00274405	0.0251911
TMEM53	2.59631	2.75566	3.46806	3.69466	10.4624	11.4103	2.81116	1.49116	0.00275836	0.0252997
VWA8	40.0986	46.4525	42.7727	29.3399	24.8109	27.0994	-1.56646	-0.647506	0.0027616	0.0252997
C22orf39	7.21198	9.84163	13.2942	19.1253	22.4195	14.2628	1.84608	0.884463	0.00276092	0.0252997
WASF1	28.5595	31.4932	42.1947	19.9946	23.0174	19.6114	-1.63884	-0.712678	0.00276869	0.0253473
COG8	29.4249	22.4389	26.5884	40.6412	47.5294	39.2227	1.60107	0.679033	0.00278702	0.0254959
SLC25A11	31.4442	41.3349	30.6345	49.1172	53.8069	54.5553	1.53747	0.620556	0.00278877	0.0254959
ECSIT	15.5779	21.2579	15.6062	25.8626	30.4906	28.5256	1.63495	0.709243	0.00279557	0.0255406
PPP4R2	66.9272	65.3484	63.581	51.2905	33.7788	41.7187	-1.52829	-0.611914	0.00280521	0.025611
TOMM40L	8.94286	7.87331	6.93611	14.7786	14.3485	14.976	1.85117	0.888436	0.00281942	0.0256264
CREG1	27.4055	20.8643	11.2712	12.8226	5.97854	10.3405	-2.02377	-1.01704	0.00282231	0.0256264
YOD1	14.1355	10.629	15.3172	7.60665	7.17425	4.63542	-2.02898	-1.02075	0.00282189	0.0256264
NBEAL1	47.3106	49.9955	36.4146	32.1653	26.9034	24.2468	-1.57391	-0.654351	0.00282227	0.0256264
GASK1B	6.9235	5.11765	4.62407	21.7333	6.27747	12.1234	2.4163	1.2728	0.00282171	0.0256264
LAMTOR4	10.6737	29.5249	10.4042	24.9933	37.067	38.5096	2.00299	1.00216	0.00281633	0.0256264
NIPSNAP3A	14.1355	12.991	11.2712	23.0373	20.9249	19.9679	1.68475	0.752531	0.00281203	0.0256264
FBXO34	26.5401	35.0362	41.3277	19.56	21.8217	21.3942	-1.64387	-0.717094	0.00282198	0.0256264
SYNE3	37.7908	29.5249	48.8418	25.2106	21.8217	22.8205	-1.66905	-0.73903	0.00282443	0.0256281
PTGS1	620.519	559.005	675.982	382.071	449.885	395.793	-1.51358	-0.597963	0.00283901	0.0257098
TNS2	120.296	87	99.7066	133.66	166.801	156.534	1.47971	0.565311	0.00283923	0.0257098
PSKH1	38.3677	34.6426	36.1256	50.4212	56.1983	59.9038	1.50036	0.585308	0.00283563	0.0257098
NPIPB11	5.19263	7.87331	15.3172	4.12932	3.58713	2.85256	-2.64458	-1.40304	0.00284354	0.0257312
SIK3	62.6	60.2308	94.2155	48.6825	48.4262	43.145	-1.54885	-0.631193	0.00284702	0.0257452
DNER	27.694	26.7692	36.1256	14.7786	21.8217	17.472	-1.70186	-0.767113	0.00285205	0.0257593
MRPL15	27.1171	17.3213	20.5193	30.6439	42.1487	38.153	1.67717	0.746027	0.00285246	0.0257593
LRRC49	16.1548	17.7149	9.82616	10.432	5.08176	3.20913	-2.24838	-1.16888	0.00285709	0.0257836
LSM7	14.1355	18.8959	15.8953	19.9946	35.8713	28.8822	1.72806	0.789153	0.0028603	0.0257951
BCOR	28.8479	29.9186	39.8826	10.2146	23.6152	20.6811	-1.83158	-0.873086	0.00287709	0.0259289
NUDT6	2.30783	2.36199	3.17905	9.12798	4.78283	7.13141	2.69906	1.43246	0.00289193	0.026045
INPP4B	13.27	8.66064	9.24815	6.73732	0.896781	4.27885	-2.55854	-1.35532	0.00289709	0.0260738
MCUR1	37.5023	40.1539	39.3046	23.4719	26.3056	22.4639	-1.61294	-0.689696	0.0029023	0.026103
GMCL1	20.1936	23.2263	19.3633	13.9093	9.86459	11.0537	-1.73962	-0.798769	0.00290753	0.0261323
TRAPPC5	16.1548	26.7692	10.9822	31.2959	39.4584	26.7428	1.83166	0.873151	0.00291246	0.026159
ARPC4-TTLL3	10.3853	6.69231	7.51412	1.52133	5.97854	0.713141	-2.97667	-1.5737	0.0029258	0.0262552
gene:ENSG00000277758	4.61567	4.33032	8.38113	16.3	7.7721	15.6891	2.26675	1.18063	0.00292777	0.0262552
PDZD8	49.0415	53.1448	58.0899	36.0772	33.1809	37.7965	-1.49963	-0.58461	0.002937	0.0262552
NUMB	130.104	121.249	172.825	89.3238	104.923	92.3517	-1.48454	-0.570014	0.00293535	0.0262552
PIGS	48.753	35.8235	40.1716	56.9412	67.8565	68.105	1.52138	0.605381	0.00293586	0.0262552
MRPL54	7.50046	13.7783	4.62407	14.5613	24.512	13.1931	2.04914	1.03502	0.00293359	0.0262552
DPY19L3	57.9843	60.2308	45.6627	41.7279	32.2841	30.6651	-1.54004	-0.622972	0.00293315	0.0262552
SMIM30	18.4627	14.172	12.4272	27.3839	25.4088	23.8902	1.70883	0.773009	0.0029437	0.0262974
MRPL2	14.1355	20.4706	13.5832	26.9493	32.2841	21.7508	1.71799	0.780724	0.00296764	0.0264908
HOXB4	25.6747	25.5882	26.5884	35.4252	49.9208	41.7187	1.61568	0.692144	0.00296933	0.0264908
MTX1	25.6747	27.9502	15.6062	33.2519	47.8283	38.153	1.72888	0.789838	0.00297764	0.0264909
NIF3L1	16.1548	15.3529	11.8492	24.3413	23.3163	26.0296	1.70114	0.766502	0.00297267	0.0264909
FLVCR2	12.6931	9.0543	5.78009	11.5186	24.512	19.2548	1.98975	0.99259	0.00297931	0.0264909
SLIRP	12.9816	22.4389	16.4733	26.0799	30.1916	27.8125	1.65219	0.724383	0.00297816	0.0264909
DNTTIP1	15.5779	22.0453	13.2942	27.1666	36.4691	22.4639	1.71558	0.778698	0.00297399	0.0264909
SRP72	180.011	155.498	171.091	139.093	97.1513	105.901	-1.47542	-0.561129	0.0029865	0.0265372
MN1	4.90415	4.72398	9.24815	2.39066	2.39142	1.78285	-2.84333	-1.50758	0.00302105	0.0268262
BRD1	53.6572	58.2625	83.2333	39.9892	40.3552	46.3542	-1.54851	-0.630876	0.00302604	0.0268526
PCNT	119.43	135.027	212.129	96.2784	112.994	94.4912	-1.53712	-0.620228	0.00302999	0.0268697
AOC2	2.01936	4.72398	8.09213	1.08666	0.896781	1.78285	-3.95074	-1.98212	0.00303231	0.0268723
SECISBP2	46.1567	38.5792	54.0439	30.6439	31.3873	27.4559	-1.55891	-0.640535	0.00304152	0.026936
LHFPL2	48.176	44.4842	46.8187	29.1226	27.2024	36.0136	-1.53629	-0.619451	0.00306186	0.027098
RAB11FIP1	14.1355	13.3846	17.9183	25.8626	24.8109	26.7428	1.68146	0.749717	0.00306658	0.0271218
MTSS2	185.204	218.484	245.654	122.358	180.552	128.365	-1.50638	-0.591082	0.00306909	0.0271259
DMPK	46.4452	54.7195	75.7192	32.3826	43.6434	37.4399	-1.56565	-0.646764	0.00307523	0.0271621
BCL7C	27.1171	40.1539	27.7444	42.1626	56.7962	52.0593	1.59868	0.676885	0.00308011	0.0271872
STK39	40.0986	46.0588	41.6167	29.9919	19.4303	28.1691	-1.62524	-0.700656	0.00308482	0.0271927
CHST12	17.8857	19.6833	17.9183	27.3839	37.3659	28.8822	1.68373	0.751657	0.00308335	0.0271927
SLC35G2	17.0203	19.6833	12.4272	9.77998	6.27747	9.6274	-1.87035	-0.903306	0.00309457	0.0272425
FDXR	28.271	20.4706	10.1152	27.1666	49.323	32.8045	1.85409	0.890709	0.00309351	0.0272425
BDH2	20.1936	18.1086	13.2942	27.8186	26.6045	29.5953	1.62939	0.704333	0.00310095	0.0272669
PLCB1	12.1161	8.26697	10.6932	5.65065	3.88605	5.70513	-2.05626	-1.04002	0.00310145	0.0272669
BEX3	135.008	159.828	98.8396	198.642	197.292	186.843	1.48528	0.570737	0.00310771	0.0273039
TIPARP	208.282	217.303	217.042	168.65	115.685	148.69	-1.48006	-0.565657	0.0031288	0.0274375
SPATS2	95.7751	89.362	99.1286	64.1132	62.1768	68.8181	-1.46868	-0.554522	0.00312589	0.0274375
DMAC2	29.7134	33.4616	30.3455	40.4239	57.394	48.137	1.55517	0.637074	0.00312911	0.0274375
HEXIM1	82.5051	107.471	164.444	67.1558	86.3899	74.5232	-1.5558	-0.637658	0.00314293	0.0275405
RTL8B	13.847	16.9276	22.8314	30.4266	26.0067	37.0833	1.72977	0.790583	0.00314716	0.0275594
COMT	78.4664	105.502	79.1873	113.882	164.709	115.885	1.5028	0.58765	0.00314972	0.0275636
COMMD5	8.3659	16.1403	7.51412	16.952	24.2131	18.1851	1.89022	0.918551	0.00315702	0.0275721
PALM2AKAP2	170.78	172.425	272.531	143.005	133.023	131.931	-1.50989	-0.594448	0.00316105	0.0275721
PNP	29.1364	39.3665	42.7727	16.7346	26.9034	22.8205	-1.68681	-0.754301	0.00316065	0.0275721
PKM	1272.77	1494.75	1285.78	1870.37	2218.94	2027.82	1.50964	0.594202	0.00316061	0.0275721
MRPL40	15.5779	13.7783	11.5602	21.9506	21.2238	26.0296	1.67196	0.741536	0.00315922	0.0275721
TUT1	10.3853	8.26697	8.95914	15.2133	16.441	18.1851	1.76006	0.815626	0.00316954	0.0276243
CAPRIN2	35.1945	40.9412	52.0208	26.9493	24.512	28.5256	-1.60682	-0.684208	0.00317119	0.0276243
SMPD1	84.236	85.0317	72.5402	109.318	115.984	122.304	1.43405	0.520099	0.00318509	0.0277272
HINT2	6.05807	11.81	6.3581	12.8226	21.8217	13.1931	2.00914	1.00658	0.00319398	0.0277863
NCOA1	25.9631	32.2806	36.1256	17.3866	23.0174	13.9062	-1.72566	-0.787146	0.0032029	0.027844
COPS6	95.4867	93.6924	86.1234	118.229	179.356	115.885	1.50171	0.586603	0.0032048	0.027844
ZGRF1	10.0968	12.5973	11.5602	7.17198	5.38069	3.20913	-2.02131	-1.01529	0.00321355	0.0278836
LCOR	42.118	33.0679	45.3737	25.8626	27.2024	20.3245	-1.64213	-0.715572	0.0032118	0.0278836
NDUFA12	25.9631	35.8235	25.4324	45.8572	40.3552	48.4936	1.5714	0.65205	0.00321814	0.0279053
VAV2	47.3106	41.7285	68.7831	31.9479	39.1595	26.3862	-1.62041	-0.696361	0.003223	0.0279292
DDAH1	34.906	41.7285	60.691	34.9906	21.2238	26.0296	-1.66093	-0.731993	0.00324701	0.0280942
NT5C3A	20.1936	17.7149	16.7623	15.2133	6.5764	5.34856	-1.95808	-0.969443	0.00324695	0.0280942
CRELD2	39.5217	79.5204	46.2407	29.3399	37.6648	32.8045	-1.64914	-0.721712	0.00324838	0.0280942
IFT22	8.3659	14.5656	9.53715	18.6906	16.7399	20.6811	1.77488	0.82772	0.00328068	0.0283551
PSMD8	101.545	131.091	115.891	150.394	200.281	159.744	1.46694	0.552809	0.00329435	0.0284547
NAP1L1	440.508	460.982	416.745	341.212	257.077	276.342	-1.50287	-0.587722	0.00329987	0.0284839
STOML2	48.176	60.6245	34.3915	66.0692	83.9985	73.4535	1.56837	0.649268	0.00330964	0.0285496
HSP90AB1	1458.55	1677.8	2113.78	1108.83	1184.95	1164.56	-1.51832	-0.602478	0.00332227	0.02864
TTI2	8.3659	7.87331	6.93611	11.3013	19.4303	14.2628	1.91524	0.937527	0.0033256	0.0286501
H2BC6	0.865438	1.57466	4.33507	0.217333	0	0.35657	-10.3729	-3.37474	0.00333442	0.0287075
RNF19B	20.1936	25.5882	30.0565	12.1706	18.8324	12.48	-1.74915	-0.806658	0.00334607	0.0287892
KANK2	233.38	244.86	266.462	365.988	322.542	413.622	1.47804	0.563684	0.00334919	0.0287974
STT3B	243.188	233.837	197.101	192.122	121.065	133.001	-1.50626	-0.590967	0.0033607	0.0288777
SLC33A1	58.8498	73.6154	44.7957	42.8146	28.0991	40.649	-1.57897	-0.65898	0.00337671	0.0289866
TMEM170A	12.1161	14.5656	16.1843	8.47598	7.47318	5.70513	-1.9134	-0.936135	0.00337774	0.0289866
ADM5	1.4424	2.36199	2.31204	0	0.298927	0	-15.6764	-3.97052	0.00338155	0.0290006
EIF2S3	159.818	134.634	131.786	101.929	101.635	89.1426	-1.45267	-0.538706	0.00338948	0.0290499
SLC25A1	77.024	85.0317	78.6093	95.6264	135.713	119.451	1.45434	0.540366	0.00339299	0.0290612
PARS2	3.46175	3.54299	2.60104	8.25865	7.7721	6.41827	2.38947	1.25669	0.00341126	0.0291889
TVP23B	55.0995	55.5068	44.5067	38.9026	24.512	33.8742	-1.57943	-0.6594	0.00341229	0.0291889
CUEDC2	33.1751	40.5475	34.1025	42.3799	72.3404	54.1987	1.56577	0.646876	0.00341521	0.0291951
SOCS3	24.8092	25.1946	22.2534	9.56264	18.5335	14.2628	-1.73324	-0.793469	0.00342161	0.029231
SREK1	97.7945	74.7964	84.6784	57.8105	55.8994	61.3301	-1.48393	-0.569424	0.00342813	0.0292369
AKR1C2	267.997	291.706	348.54	564.631	306.699	603.674	1.62379	0.699362	0.00342889	0.0292369
CHM	48.176	32.2806	41.6167	30.2093	21.5228	23.5336	-1.61571	-0.692169	0.0034247	0.0292369
CEP135	18.7512	18.5023	26.5884	14.344	10.7614	11.7668	-1.71771	-0.780491	0.00343246	0.0292485
MRPL55	12.9816	14.172	9.82616	18.908	25.1099	18.8982	1.71373	0.777136	0.00345278	0.0294028
TOMM6	24.2323	41.3349	26.2994	44.3359	61.2801	43.145	1.63334	0.707829	0.0034674	0.0295084
SLC38A4	6.34654	5.51131	7.22512	26.2973	3.58713	18.8982	2.54945	1.35019	0.0034788	0.0295298
USP32	99.8138	71.2534	107.51	56.9412	58.2908	70.6009	-1.51135	-0.595839	0.00347701	0.0295298
TAF4B	3.17327	7.08598	9.53715	1.956	2.39142	2.49599	-2.89046	-1.5313	0.00347292	0.0295298
DYRK1A	53.3687	51.1765	53.1768	36.7292	35.8713	32.8045	-1.48776	-0.573141	0.00347577	0.0295298
ST7L	12.1161	12.991	15.0282	8.69331	3.58713	6.41827	-2.07513	-1.0532	0.00348939	0.029567
ZNF292	59.1383	48.8145	47.6858	44.7706	24.2131	22.8205	-1.67803	-0.746766	0.00348986	0.029567
KMT5B	54.5226	45.2715	50.2868	37.1639	27.2024	31.7348	-1.55014	-0.632396	0.00348687	0.029567
MTRNR2L8	11.5392	13.3846	20.5193	5.65065	11.0603	6.0617	-2.00993	-1.00714	0.0035021	0.0296518
PER2	3.75023	5.11765	7.22512	0.869331	1.49464	2.85256	-3.3029	-1.72373	0.00351074	0.0297061
BAD	17.0203	29.9186	16.1843	25.4279	44.2412	39.5793	1.73891	0.798187	0.00351473	0.0297209
TCERG1	90.871	86.2127	94.7935	64.3305	65.764	53.8421	-1.46888	-0.554715	0.00353277	0.0298545
S100A4	0	1.181	0	2.17333	3.88605	1.78285	7.45539	2.89828	0.00354176	0.0299114
NTAN1	40.3871	44.4842	35.5476	60.4185	57.9919	57.7644	1.48161	0.567168	0.00354446	0.0299152
PRPS1	29.4249	26.7692	19.6523	51.2905	32.2841	41.0056	1.65375	0.725738	0.00355157	0.0299562
SLC39A1	62.3115	79.1267	66.1821	89.3238	101.934	109.467	1.44966	0.535716	0.00356346	0.0300006
DLG4	60.5807	43.3032	62.714	33.4693	42.4476	34.2308	-1.5264	-0.610137	0.00356356	0.0300006
PRMT2	62.0231	71.2534	67.0491	89.3238	109.706	93.4215	1.46114	0.547094	0.00356361	0.0300006
UBR5	304.346	251.158	328.887	210.161	185.335	204.671	-1.4759	-0.561593	0.00357264	0.0300577
CDK6	138.47	163.371	201.147	132.79	107.315	98.77	-1.47987	-0.565472	0.00358474	0.0301404
ATAD3A	74.1392	102.747	115.024	41.9452	81.906	56.6947	-1.6194	-0.69546	0.00358903	0.0301506
ARHGEF10	69.235	59.8371	105.776	52.1599	50.8176	45.2844	-1.58566	-0.665085	0.00359049	0.0301506
RNASEH2C	22.2129	24.0136	17.3403	28.6879	32.2841	42.0753	1.61195	0.688806	0.00359643	0.0301814
BOLA1	4.32719	2.75566	2.89005	8.25865	6.87532	9.27083	2.37971	1.25079	0.00361339	0.0302808
ADH5	110.776	108.258	76.0082	146.048	140.197	146.55	1.47044	0.556247	0.0036151	0.0302808
NOX4	5.48111	9.0543	6.3581	19.56	9.86459	12.48	2.06303	1.04476	0.00361063	0.0302808
GLTP	27.694	28.3439	27.1664	43.0319	42.7466	41.7187	1.53788	0.620942	0.00362528	0.0303087
MYO16	0.865438	1.57466	5.20208	0.217333	0.597854	0	-8.27647	-3.04902	0.00362416	0.0303087
MYL9	237.418	262.181	242.186	375.768	294.443	435.372	1.4904	0.575698	0.00362404	0.0303087
SNAP47	20.7705	20.8643	17.0513	29.3399	33.7788	32.4479	1.62252	0.698235	0.0036364	0.0303826
MOGS	62.0231	63.3801	54.9109	77.3705	93.8631	97.3437	1.48125	0.566811	0.00364318	0.0304201
SMG7	119.43	111.407	151.727	81.9345	93.8631	89.1426	-1.45144	-0.537489	0.00364846	0.030445
MVP	237.418	168.882	195.945	258.409	391.595	272.776	1.53021	0.613734	0.00365077	0.0304453
REST	61.7346	61.8055	69.9391	50.2039	32.5831	43.8582	-1.51923	-0.603342	0.00365999	0.0304813
FIBP	33.4636	44.0905	30.3455	48.0305	53.8069	63.4695	1.53665	0.619787	0.00365902	0.0304813
NAGA	40.3871	41.3349	40.7496	60.4185	58.8886	60.617	1.47064	0.556442	0.00366197	0.0304813
CYP27B1	4.32719	4.33032	4.33507	0.651998	2.39142	0.35657	-3.78581	-1.9206	0.0036894	0.0306712
MPDU1	40.3871	55.5068	52.5988	67.8078	80.4114	74.8798	1.50637	0.591076	0.00368825	0.0306712
MAP1B	379.062	380.674	535.526	307.091	256.778	294.171	-1.50988	-0.594438	0.00369971	0.0307376
PPIG	60.0037	58.6561	64.159	48.8999	31.0884	39.5793	-1.51601	-0.600275	0.0037162	0.0308361
NXN	10.6737	6.69231	6.64711	19.1253	8.36996	22.1074	2.04739	1.03379	0.00371401	0.0308361
TMEM39A	80.1972	84.2444	69.0721	53.0292	51.4155	51.3461	-1.48494	-0.570403	0.00372699	0.0309063
RPL35	200.782	416.104	195.367	381.202	537.172	456.767	1.69426	0.760659	0.00373193	0.030928
ZNF639	36.6369	37.0045	26.2994	27.8186	13.4517	14.2628	-1.77041	-0.824087	0.00374487	0.0310159
DGUOK	21.059	29.9186	24.8544	37.3812	40.0562	44.2147	1.61124	0.688176	0.00375382	0.0310513
TAX1BP1	160.971	146.444	154.039	128.009	78.6178	104.475	-1.47942	-0.565032	0.00375271	0.0310513
MRPS21	33.7521	42.5159	23.6984	47.3786	68.1554	45.2844	1.61778	0.694017	0.00376638	0.0311344
ITPRID2	218.667	212.186	254.035	165.39	159.029	145.124	-1.45638	-0.542386	0.003769	0.0311344
GOLGA6L9	17.8857	17.3213	19.0743	9.77998	8.96781	13.5497	-1.72425	-0.785972	0.00377089	0.0311344
SH3D19	49.6184	37.7919	53.4659	86.7158	52.6112	81.2981	1.56145	0.642883	0.00378005	0.0311907
DNAJB5	8.65438	14.172	8.95914	16.0826	19.4303	19.6114	1.75887	0.814649	0.00378243	0.0311909
TANC2	228.764	224.783	350.274	183.212	161.122	188.269	-1.5105	-0.595022	0.00379478	0.0312607
POLR2E	111.93	138.177	106.354	151.481	195.498	171.867	1.45842	0.54441	0.00379559	0.0312607
MRPL58	10.9622	16.1403	9.53715	15.648	26.0067	23.1771	1.77719	0.8296	0.00380082	0.0312844
CENPE	77.3125	56.2941	61.558	56.7239	14.9464	33.8742	-1.84271	-0.881832	0.00381258	0.0313553
MDN1	89.1401	82.6697	161.265	68.4598	67.5575	78.0889	-1.55909	-0.640703	0.00381415	0.0313553
SPARC	1618.66	1830.94	1661.49	2970.07	2038.98	2736.68	1.51576	0.600037	0.00382418	0.0314045
COMMD4	17.5972	27.1629	17.9183	29.3399	37.9637	33.8742	1.63295	0.707479	0.00382714	0.0314045
TTC38	15.2894	19.6833	15.0282	25.2106	31.3873	24.6034	1.64566	0.718667	0.00382723	0.0314045
TNFRSF12A	88.8516	128.335	89.5914	129.748	180.552	146.194	1.49164	0.576903	0.00383262	0.0314294
RAB21	48.4645	49.2082	56.9339	38.6852	32.882	27.4559	-1.53563	-0.618826	0.00385273	0.0315748
RAB3IL1	2.88479	6.29865	10.1152	1.52133	3.2882	1.42628	-3.07409	-1.62016	0.00386304	0.0316398
HTRA3	26.2516	46.8462	36.9926	47.3786	75.6286	52.4159	1.59926	0.677403	0.00386742	0.0316562
ABCC2	3.75023	5.90498	12.7162	3.04266	2.98927	1.42628	-2.92194	-1.54693	0.00387331	0.0316654
ATP5MJ	21.9244	45.6652	22.2534	48.0305	46.9316	53.129	1.66298	0.733774	0.0038715	0.0316654
DGAT1	14.1355	16.5339	19.0743	25.4279	29.8927	26.3862	1.63189	0.706548	0.00388944	0.0317777
NPIPB6	2.59631	3.93665	6.3581	1.52133	1.19571	0.35657	-3.82602	-1.93584	0.00389226	0.0317812
CLUH	82.5051	87.3937	136.41	54.1159	84.5964	57.7644	-1.56162	-0.643045	0.00389792	0.0318079
CTF1	5.48111	5.11765	4.04606	8.91064	9.56567	12.1234	2.04206	1.03003	0.00390187	0.031814
STX8	14.7124	23.6199	10.9822	23.2546	35.2734	26.3862	1.74038	0.799399	0.00390346	0.031814
TRMT112	35.483	75.5837	28.9005	72.1545	89.6781	79.8718	1.73447	0.794492	0.00391895	0.0319012
RCCD1	11.8277	8.66064	10.4042	17.8213	17.6367	17.472	1.68814	0.755439	0.00391882	0.0319012
VDAC3	61.7346	66.1358	45.6627	92.3664	77.721	87.0032	1.49239	0.577621	0.00394942	0.0321098
COA4	13.847	25.9819	8.95914	25.2106	31.6863	29.5953	1.79258	0.842039	0.00394832	0.0321098
KLHL12	43.8489	31.8869	20.2303	56.2892	50.5187	49.9199	1.63437	0.708739	0.00395292	0.0321148
GLCCI1	35.1945	23.6199	36.9926	23.6893	12.256	18.5417	-1.75197	-0.808976	0.00395486	0.0321148
MEIS1	57.1189	60.2308	53.4659	96.4958	60.3833	106.615	1.54315	0.625878	0.00396629	0.032188
MAD2L1BP	9.51982	12.2036	8.95914	16.5173	16.441	19.2548	1.71238	0.776002	0.00397618	0.0322177
ZFP91	142.509	138.57	150.86	112.361	89.0803	96.274	-1.44184	-0.527913	0.00397339	0.0322177
RARA	27.1171	31.4932	46.2407	20.4293	22.7185	22.1074	-1.61521	-0.691724	0.00397722	0.0322177
MCFD2	289.633	240.136	260.682	209.291	150.659	174.72	-1.4762	-0.561885	0.00398424	0.0322549
RPP25L	2.30783	5.11765	3.46806	8.04131	12.5549	5.70513	2.47963	1.31012	0.00399787	0.0323258
CDCA5	27.9825	44.0905	39.8826	23.4719	20.626	23.5336	-1.63967	-0.71341	0.00399752	0.0323258
ECI2	47.0221	35.4299	32.3685	49.7692	70.5468	57.0513	1.53589	0.619072	0.00401064	0.0324094
ARFGAP2	51.6378	37.0045	42.1947	58.2452	81.0092	60.9735	1.51958	0.603668	0.00404972	0.0327053
KCTD9	90.5825	85.819	91.0365	72.1545	34.0777	62.3998	-1.58255	-0.662252	0.00405295	0.0327115
SIPA1L2	12.6931	13.7783	20.8083	6.95465	9.86459	8.91426	-1.87351	-0.905741	0.00407786	0.0328701
ZEB2	114.815	114.557	157.508	103.45	61.2801	90.9255	-1.512	-0.596462	0.00408002	0.0328701
REPS1	67.5042	62.1991	78.8983	41.5106	55.0026	43.145	-1.50426	-0.589056	0.00407728	0.0328701
SPATC1L	10.6737	11.81	12.4272	17.8213	20.626	22.4639	1.71315	0.776652	0.00408481	0.0328888
HAGH	13.847	20.8643	11.8492	24.1239	28.9959	24.9599	1.71442	0.777718	0.00409967	0.0329885
MATR3_1	282.71	251.158	289.872	207.987	167.698	188.269	-1.45937	-0.545342	0.00411733	0.0331079
PHPT1	26.8286	54.7195	21.3863	47.8132	69.0522	58.4775	1.71221	0.775858	0.00412199	0.0331079
ORC6	20.482	22.8326	35.8366	17.3866	11.3592	16.0457	-1.7639	-0.81877	0.0041207	0.0331079
DCP2	24.2323	29.9186	23.6984	19.3426	10.4624	14.2628	-1.72182	-0.783937	0.0041287	0.0331418
DDR2	373.292	313.358	296.23	246.673	189.52	228.205	-1.47835	-0.563989	0.00414014	0.0331938
CNNM4	18.1742	18.8959	28.9005	10.2146	17.3378	9.6274	-1.78175	-0.833294	0.00414017	0.0331938
ATP5PO	60.0037	76.3711	55.7779	87.5851	94.461	100.909	1.4806	0.566181	0.00414393	0.0332039
ADI1	87.4092	110.62	79.4763	125.401	135.414	136.923	1.44096	0.527025	0.00414913	0.0332255
PLEKHO1	60.5807	78.7331	70.8061	86.7158	129.435	93.0649	1.47347	0.559222	0.00416019	0.033294
DCXR	8.94286	16.5339	7.80312	19.1253	21.8217	17.8285	1.81993	0.863886	0.00416287	0.0332954
MYADM	107.891	122.036	129.763	68.4598	97.1513	84.1506	-1.44605	-0.53212	0.00419211	0.0335092
PMPCA	46.4452	32.6742	37.8596	53.8985	68.7532	55.2684	1.50603	0.590755	0.00420559	0.0335967
NDEL1	97.506	107.077	124.561	78.6745	70.2479	80.9415	-1.43343	-0.519467	0.0042198	0.03369
UQCR11	22.7899	48.0272	19.3633	48.8999	61.579	44.9279	1.73636	0.796065	0.00422358	0.0336999
UROD	41.8295	53.5385	32.6575	54.1159	81.6071	63.113	1.55845	0.640108	0.00423035	0.0337337
YY1	161.548	158.253	202.303	111.926	130.93	121.947	-1.43699	-0.523053	0.00423326	0.0337367
VPS13B	101.256	91.724	120.515	81.2825	76.8243	54.9118	-1.46605	-0.551933	0.00424739	0.033829
ASTN2	3.17327	1.96833	1.44502	8.25865	4.78283	4.99199	2.77662	1.47333	0.0042551	0.0338701
SLC10A7	12.4046	6.69231	10.1152	5.65065	3.88605	3.92227	-2.1465	-1.10198	0.00427271	0.0339818
DYM	73.5622	75.1901	65.8931	51.0732	46.3337	47.7804	-1.46327	-0.549198	0.00427424	0.0339818
DGKD	42.118	49.2082	60.402	28.0359	39.1595	29.5953	-1.57296	-0.653486	0.00428373	0.0340368
ZNF598	70.6774	79.1267	103.464	56.9412	60.0843	51.7027	-1.50027	-0.585218	0.00432954	0.0343803
ARHGAP26	10.9622	7.08598	10.9822	4.56399	4.18498	5.70513	-2.08259	-1.05838	0.00433924	0.0344303
PSMG3	9.51982	12.2036	7.51412	12.388	22.4195	18.1851	1.8135	0.858779	0.00434103	0.0344303
WDTC1	55.6765	58.6561	57.2229	76.7185	98.6459	80.2283	1.48711	0.572508	0.0043653	0.0346022
TAF10	39.2332	43.3032	40.4606	56.5065	63.3725	60.9735	1.46788	0.553736	0.00437066	0.034624
C1orf116	0.865438	1.96833	3.46806	0.434666	0	0	-9.77845	-3.28961	0.00438132	0.0346878
REV1	33.7521	27.9502	38.1486	21.0813	21.8217	21.7508	-1.56973	-0.65052	0.00439943	0.0348105
KTI12	8.07742	8.66064	7.80312	14.1266	14.9464	14.6194	1.78066	0.832413	0.00442219	0.0348867
ARIH2	88.5631	105.109	115.024	66.7212	77.4221	72.0272	-1.43136	-0.517386	0.0044195	0.0348867
VPS37A	67.5042	54.7195	59.824	47.3786	32.5831	40.649	-1.5027	-0.587558	0.00442144	0.0348867
NID2	477.722	359.416	547.953	261.886	344.962	307.007	-1.51772	-0.601903	0.00441743	0.0348867
HSPA2	1.73088	5.51131	13.8722	1.956	2.09249	2.13942	-3.38752	-1.76023	0.00441684	0.0348867
MAGEE1	0.288479	0.787331	0.289005	2.60799	2.98927	1.78285	5.54766	2.47188	0.00442837	0.0349148
ZSWIM7	7.50046	9.84163	7.80312	13.2573	20.9249	12.48	1.8705	0.903428	0.00443132	0.0349174
ANTXR2	142.509	125.973	148.259	99.3211	101.336	91.6386	-1.42915	-0.51516	0.00444015	0.0349662
PDLIM2	18.7512	36.6109	20.2303	40.4239	37.9637	45.9976	1.6639	0.73457	0.00446135	0.0351123
NOL12	10.9622	15.3529	12.4272	17.3866	27.2024	21.0377	1.69697	0.762963	0.00447255	0.0351797
RFX5	40.6756	24.8009	20.8083	55.2025	37.067	50.9896	1.65676	0.728367	0.00448279	0.0352393
ECHS1	51.3493	59.4435	42.1947	63.6785	94.461	75.5929	1.53014	0.613667	0.00450634	0.0353617
SSTR1	6.05807	7.47964	11.2712	3.04266	1.79356	5.34856	-2.50029	-1.3221	0.00450385	0.0353617
PRDX2	66.0618	85.0317	41.3277	84.1078	118.375	98.0569	1.56565	0.646757	0.00450519	0.0353617
ARMCX3	124.335	105.502	115.602	99.3211	56.1983	77.3758	-1.47915	-0.564766	0.00452357	0.035476
WNT5B	46.7336	66.5294	72.8292	79.7611	116.582	89.1426	1.53396	0.617263	0.00454693	0.0356382
TPR	275.209	220.059	269.93	193.209	156.937	176.146	-1.45441	-0.540433	0.00455144	0.0356382
SNRPG	26.5401	47.2398	21.0973	45.6399	56.4972	55.2684	1.67044	0.740232	0.0045523	0.0356382
CABLES1	12.9816	6.29865	11.5602	6.30265	2.09249	5.34856	-2.23106	-1.15773	0.00455819	0.0356633
SNX16	8.3659	8.66064	7.51412	4.34666	2.39142	3.5657	-2.28868	-1.19452	0.00459402	0.0359226
RFC1	91.4479	77.5521	87.8574	60.6359	50.5187	65.2524	-1.46709	-0.552953	0.00460032	0.0359296
XPO5	54.2341	69.2851	85.5454	46.7266	43.6434	48.137	-1.5098	-0.594355	0.00459912	0.0359296
SUCLG1	32.5982	49.2082	27.4554	52.5945	59.4865	54.5553	1.54048	0.623382	0.00460892	0.035962
DCAKD	23.0783	22.8326	17.3403	31.9479	31.0884	37.0833	1.57872	0.658751	0.00460989	0.035962
LRRC58	54.2341	45.2715	52.5988	44.3359	25.4088	22.8205	-1.62631	-0.701599	0.00463248	0.0361171
PFKFB3	40.6756	60.6245	76.0082	35.4252	36.768	42.0753	-1.55461	-0.636548	0.00466592	0.0363565
SCG2	1.73088	1.57466	2.02303	0.217333	0	0	-14.0556	-3.81307	0.00466951	0.0363631
CANX	1153.34	1172.73	1231.74	852.814	794.249	766.983	-1.47084	-0.556643	0.00467545	0.036388
S100A2	1.15392	1.181	0.867014	2.39066	5.67962	4.63542	3.76985	1.91451	0.004694	0.036511
MUL1	24.8092	31.0996	23.6984	38.6852	43.0455	41.0056	1.55681	0.638593	0.00470165	0.0365491
CRADD	5.19263	4.33032	5.49109	6.73732	15.8431	10.3405	2.14165	1.09873	0.0047062	0.0365631
NDUFA8	33.7521	27.1629	17.6293	41.5106	41.2519	44.9279	1.62475	0.70022	0.00472261	0.0366692
EHBP1	81.0627	65.7421	77.1642	56.5065	36.1702	54.9118	-1.51807	-0.602237	0.0047268	0.0366738
RAB33A	1.73088	2.36199	1.44502	0	0.298927	0	-14.0567	-3.81319	0.00472872	0.0366738
TCTA	21.9244	23.2263	18.7853	30.8613	35.8713	33.161	1.56289	0.644213	0.00476038	0.0368978
COX7A2	31.4442	73.2218	32.9465	71.5025	83.9985	73.4535	1.67241	0.741924	0.00478543	0.0370475
SSNA1	19.6166	28.7376	20.8083	33.2519	45.7358	33.5176	1.64338	0.716665	0.00478805	0.0370475
PPP1R13B	4.32719	5.11765	7.22512	2.17333	2.09249	1.78285	-2.70446	-1.43534	0.00478801	0.0370475
PLEKHF1	14.7124	12.5973	10.6932	5.65065	7.7721	6.0617	-1.96857	-0.977151	0.00479105	0.0370491
HMGB2	66.6387	80.3077	99.9956	58.6799	31.0884	63.113	-1.61521	-0.691721	0.00480192	0.0371116
WBP1	18.7512	26.7692	9.24815	28.9053	36.4691	32.4479	1.8007	0.848558	0.00482988	0.0372844
SLC2A12	4.90415	2.36199	2.31204	9.12798	5.08176	10.3405	2.49589	1.31956	0.0048325	0.0372844
EIF6	53.3687	90.9367	57.5119	77.5878	136.012	99.1266	1.55261	0.634696	0.0048327	0.0372844
NAV2	178.28	177.149	342.759	154.741	107.913	172.224	-1.60643	-0.683854	0.00484315	0.0373267
ALPK3	3.17327	1.96833	2.60104	1.08666	0	0	-5.33043	-2.41425	0.00484379	0.0373267
ZBTB8OS	10.9622	10.629	9.82616	16.0826	20.9249	16.7588	1.69758	0.763477	0.00486697	0.0374836
MTRNR2L12	35.1945	35.0362	42.1947	22.6026	22.1206	27.4559	-1.58636	-0.665722	0.00487453	0.0375201
PHLDB1	182.03	184.629	165.311	241.239	247.811	277.055	1.43689	0.52295	0.00490149	0.0376839
RPS15	174.818	354.692	192.188	310.351	484.561	377.965	1.62641	0.701694	0.00490084	0.0376839
NOP9	51.3493	37.3982	39.5936	58.2452	65.465	69.8878	1.48714	0.57254	0.00490852	0.0377162
LCMT2	4.90415	3.54299	3.46806	8.25865	9.26674	9.27083	2.19165	1.13202	0.00491551	0.0377481
FTH1	3713.59	4093.33	3740.01	4709.38	7452.25	5398.48	1.52075	0.604782	0.00493553	0.0378799
SLC35A4	41.541	43.3032	43.3507	58.6799	66.3618	63.113	1.45992	0.545886	0.00494488	0.0379297
VPS13C	83.3705	65.3484	66.7601	57.5932	41.5509	44.2147	-1.49399	-0.579168	0.00499044	0.0382572
EDNRA	26.8286	38.9729	27.1664	18.4733	20.0281	16.4022	-1.65841	-0.729803	0.00499966	0.0383057
CCDC47	101.833	97.629	120.515	76.9358	70.8457	78.4455	-1.42109	-0.507001	0.00501596	0.0384085
CKS1B	32.0212	49.2082	32.0795	62.1572	48.7251	58.8341	1.51595	0.600225	0.00501965	0.0384146
TMEM14A	4.90415	9.44797	4.91308	13.4746	10.7614	13.1931	2.04096	1.02925	0.00503594	0.0385171
FAM241A	6.05807	7.47964	9.53715	3.04266	3.58713	3.5657	-2.28774	-1.19392	0.00503912	0.0385193
KCNG1	49.9069	74.4027	80.3433	31.7306	59.1876	36.7268	-1.60436	-0.682001	0.00505507	0.038619
gene:ENSG00000279765	8.65438	9.84163	6.93611	4.78132	3.58713	1.78285	-2.28982	-1.19523	0.0050617	0.0386474
MMP2	587.055	584.593	610.956	951.483	689.625	1023	1.49427	0.579437	0.00508238	0.038783
TCP11L2	17.8857	19.6833	21.3863	9.56264	13.7506	12.1234	-1.69932	-0.764958	0.00509146	0.0388078
TBX3	315.885	346.819	514.717	264.711	257.077	265.288	-1.49651	-0.581601	0.00509122	0.0388078
TUBA1C	263.382	326.349	242.186	472.699	286.97	526.298	1.54642	0.628934	0.00509632	0.0388226
ARL3	32.0212	35.4299	21.0973	44.9879	49.024	43.145	1.56507	0.646231	0.00509982	0.038827
TUBB6	149.144	172.425	166.756	248.629	209.548	241.042	1.43699	0.523051	0.00511016	0.0388835
RBM39	248.381	255.882	278.6	188.862	157.834	196.114	-1.44318	-0.529254	0.00511785	0.0389197
SP110	10.6737	7.08598	11.8492	16.952	16.1421	19.2548	1.70557	0.770257	0.00512574	0.0389507
GK5	32.0212	27.1629	31.5015	23.2546	17.6367	12.8365	-1.65044	-0.722853	0.00512779	0.0389507
SKIL	60.2922	59.8371	68.7831	57.1585	22.4195	34.5873	-1.64554	-0.718563	0.0051598	0.0389962
GTF2H5	17.8857	19.6833	10.1152	27.3839	21.8217	31.3782	1.70207	0.767294	0.00516005	0.0389962
FAM120B	42.9834	30.7059	31.5015	51.7252	51.7144	55.625	1.49155	0.576808	0.00516161	0.0389962
ARPC1B	121.161	149.986	119.07	165.39	206.26	182.207	1.42265	0.508583	0.00516311	0.0389962
AZIN1	142.509	143.294	117.914	123.445	61.2801	79.8718	-1.52024	-0.604303	0.00515048	0.0389962
LRRC56	2.59631	3.54299	4.33507	0.869331	0.896781	1.06971	-3.64081	-1.86426	0.0051414	0.0389962
FAR2	10.0968	10.2353	8.09213	4.34666	5.97854	2.13942	-2.18791	-1.12955	0.0051451	0.0389962
CEP95	22.5014	24.8009	29.1895	18.6906	13.7506	12.1234	-1.67097	-0.740688	0.00514421	0.0389962
BPTF	161.837	138.964	221.667	133.877	102.233	118.738	-1.47282	-0.55858	0.00515165	0.0389962
MBD2	57.9843	70.4661	76.5862	46.7266	43.6434	48.4936	-1.47499	-0.560704	0.00514848	0.0389962
MRPL21	10.6737	22.4389	10.4042	18.908	33.4798	26.7428	1.83465	0.875502	0.00516904	0.0390187
SELENBP1	8.94286	6.29865	7.80312	14.1266	14.3485	14.2628	1.8176	0.862038	0.00517207	0.0390195
ATP11C	53.0802	47.6335	49.9978	41.5106	22.4195	31.0216	-1.574	-0.654438	0.00519274	0.0391532
CCDC18	22.2129	14.172	15.3172	15.2133	3.58713	4.63542	-2.16251	-1.11271	0.0051997	0.0391835
BRPF1	36.0599	44.4842	58.6679	24.7759	37.067	24.9599	-1.60645	-0.683873	0.00521181	0.0392111
CORO1B	56.5419	66.1358	63.87	72.8065	124.354	86.6466	1.52009	0.604156	0.00521222	0.0392111
CHD9	141.643	122.824	130.341	106.928	77.4221	90.9255	-1.42935	-0.515363	0.00520662	0.0392111
TBC1D4	47.0221	51.1765	87.2794	43.6839	39.7573	33.8742	-1.5789	-0.658919	0.00523758	0.0393796
SOX12	56.2535	52.3575	58.6679	75.6318	89.0803	84.5072	1.46936	0.555188	0.00524983	0.0394494
TMEM205	9.51982	14.9593	10.4042	16.952	24.512	18.5417	1.74199	0.800734	0.00525935	0.0394986
PHGDH	122.892	174.394	116.18	190.384	211.341	197.897	1.4553	0.541321	0.00526434	0.0395138
NABP2	29.1364	27.5566	26.5884	39.5546	41.2519	47.4239	1.51893	0.603053	0.00529825	0.0397458
RNPEP	78.7549	76.3711	73.6962	109.536	97.1513	117.312	1.41264	0.498394	0.00532779	0.0399449
CTSC	64.6194	79.9141	76.5862	103.885	98.9449	106.971	1.4092	0.494875	0.00537561	0.0402807
NEURL1	1.15392	1.57466	2.89005	0.217333	0.298927	0	-8.67564	-3.11697	0.00539682	0.0404169
TAF5	14.1355	14.172	15.8953	8.47598	8.66889	8.20112	-1.74363	-0.802091	0.00540321	0.0404192
HSP90AA1	1872.23	1771.49	2452.2	1546.54	1049.83	1425.21	-1.51579	-0.600067	0.00540261	0.0404192
GCH1	2.30783	0.787331	2.02303	0.217333	0	0	-14.0529	-3.81279	0.00540966	0.0404224
CALML4	3.17327	3.54299	5.20208	1.08666	1.79356	0	-3.81987	-1.93352	0.00540972	0.0404224
TMEM41B	30.8673	28.7376	28.3225	22.6026	18.2346	10.3405	-1.67958	-0.748098	0.00544312	0.0406491
PIKFYVE	90.0055	72.8281	96.5275	59.9839	61.579	58.121	-1.45439	-0.540418	0.00546064	0.0406885
GRHPR	50.1954	59.8371	44.2177	68.2425	86.9878	74.5232	1.49597	0.581081	0.00545776	0.0406885
PSMB7	109.622	142.901	108.666	159.74	210.744	151.542	1.44923	0.535285	0.00545997	0.0406885
TRIM16	145.971	140.932	110.689	169.302	187.726	213.229	1.4325	0.518536	0.00545949	0.0406885
NRP2	176.261	197.62	202.014	284.923	255.284	285.613	1.43673	0.522789	0.00547126	0.0407448
N4BP2	19.9051	33.4616	18.7853	17.604	11.0603	11.7668	-1.74256	-0.801207	0.00548019	0.0407885
VPS29	34.329	31.4932	23.6984	53.6812	41.5509	41.7187	1.54561	0.628177	0.00549084	0.0408449
EXOC6	10.3853	9.84163	9.53715	6.08532	2.09249	5.34856	-2.12721	-1.08896	0.00549992	0.0408895
UBE3A	107.314	94.086	95.9495	83.8905	54.7037	64.1827	-1.45834	-0.544332	0.00552663	0.0410651
UCK2	32.0212	24.4073	34.1025	44.9879	49.6219	44.9279	1.51222	0.596668	0.00553702	0.0411193
PPP6R3	109.334	85.819	118.781	78.4571	75.9275	66.3221	-1.42368	-0.509627	0.00554112	0.0411268
PRRC2C	385.12	346.426	530.612	278.838	264.849	308.077	-1.48347	-0.568972	0.00554681	0.0411461
MARCKSL1	70.9659	83.0634	72.2512	96.4958	118.076	105.901	1.41824	0.504099	0.00556047	0.0411945
BIRC6	171.357	162.584	201.436	145.178	105.521	123.73	-1.42749	-0.513478	0.00556264	0.0411945
TMED1	24.5207	24.0136	18.7853	33.4693	35.5723	33.8742	1.53476	0.618014	0.0055621	0.0411945
PLEKHA3	29.7134	24.0136	27.1664	20.4293	15.8431	11.7668	-1.64364	-0.716896	0.00557246	0.0412443
TM2D2	49.33	40.5475	29.4785	76.2838	47.5294	61.6867	1.55843	0.64009	0.00559041	0.0413541
ARTN	0.576959	2.36199	3.17905	0.217333	0.298927	0	-9.27175	-3.21284	0.00560789	0.0414603
SETD1A	59.1383	62.9865	124.272	34.5559	63.6715	47.4239	-1.69583	-0.761994	0.00561534	0.0414924
TRAPPC10	76.447	86.6064	119.937	62.3745	55.8994	70.9575	-1.49952	-0.5845	0.00561958	0.0415006
NIT1	17.3088	17.7149	10.4042	23.0373	26.3056	26.3862	1.67398	0.743282	0.0056282	0.0415412
ZNF469	109.911	128.335	197.101	96.9304	97.4502	98.0569	-1.48987	-0.575189	0.00564495	0.0416417
MRPS23	17.8857	18.1086	13.5832	25.2106	30.1916	23.8902	1.6118	0.688675	0.0056551	0.0416934
IGF2BP3	117.123	86.2127	71.3841	146.7	118.973	135.497	1.45993	0.545895	0.00568114	0.0418622
BACH1	65.4848	66.1358	67.3381	48.4652	42.7466	45.641	-1.44496	-0.531033	0.00568824	0.0418913
ARID4A	27.4055	25.5882	31.7905	22.8199	15.8431	12.48	-1.62287	-0.69855	0.0056948	0.0419164
SH3BGRL3	321.077	326.349	341.025	417.062	552.118	485.292	1.46957	0.555394	0.00571023	0.0419911
MRPL44	17.0203	19.6833	14.4502	23.6893	31.9852	25.6731	1.59643	0.674846	0.00571126	0.0419911
CTSB	795.626	783.788	836.957	1009.95	1435.45	1131.75	1.47986	0.565462	0.00571623	0.0420043
JRK	27.4055	18.1086	24.2764	33.2519	43.0455	37.7965	1.59869	0.676893	0.00572578	0.0420513
HDDC2	21.059	24.0136	18.7853	33.0346	36.4691	28.1691	1.55884	0.640475	0.00575483	0.0422413
JAG1	23.0783	31.8869	32.3685	18.0386	20.626	14.2628	-1.62567	-0.701032	0.00576659	0.0423043
SLC25A33	6.9235	14.5656	11.2712	5.86799	5.38069	4.27885	-2.02844	-1.02037	0.00577213	0.0423215
COPRS	19.6166	24.4073	16.7623	31.2959	34.3766	29.2388	1.5942	0.672831	0.00579246	0.0424472
GPX4	106.16	177.937	96.5275	170.824	205.363	188.626	1.48737	0.572765	0.00579836	0.042467
DCAF10	64.6194	67.7104	52.5988	47.3786	37.9637	37.7965	-1.4782	-0.563844	0.00580391	0.0424843
GMPR2	38.6562	25.9819	27.1664	43.2492	48.4262	49.5633	1.51606	0.600324	0.00582208	0.0425938
RCOR1	57.9843	41.3349	57.2229	38.9026	31.3873	34.2308	-1.50095	-0.585879	0.00584002	0.0427015
TMEFF2	13.5585	22.4389	29.7675	13.9093	8.96781	13.9062	-1.78165	-0.833215	0.00584532	0.0427168
DIAPH3	49.9069	45.6652	59.2459	40.8586	22.1206	34.9439	-1.57612	-0.656376	0.00585768	0.0427836
NELFE	49.0415	49.2082	47.6858	60.8532	90.5749	65.9655	1.48627	0.5717	0.0058836	0.0429493
CERS1	2.30783	3.93665	4.33507	0.651998	1.19571	1.06971	-3.64073	-1.86423	0.00590421	0.0430761
GLB1	66.3502	76.7647	51.1538	84.7598	115.984	87.3598	1.48755	0.572942	0.00591146	0.0431053
SHISA5	128.085	125.186	123.116	165.39	193.705	168.658	1.39884	0.484229	0.00593461	0.0432504
POLG2	12.1161	22.8326	26.2994	12.6053	10.7614	10.3405	-1.79664	-0.845298	0.00594789	0.0433234
gene:ENSG00000257411	0	13.7783	0	0	0	0	-123.323	-6.94629	0.00595671	0.0433402
NFS1	22.2129	21.6516	13.5832	32.8173	28.697	31.3782	1.6377	0.711672	0.00595399	0.0433402
PRSS12	91.7364	91.3304	108.088	138.441	129.734	147.264	1.4177	0.503553	0.0059637	0.0433673
ZNF287	5.19263	5.90498	4.04606	11.736	6.87532	11.4103	2.02282	1.01637	0.00596732	0.0433699
PCYOX1L	11.5392	10.2353	8.09213	14.996	21.5228	14.976	1.71741	0.780232	0.00597577	0.0434076
NSL1	17.5972	15.3529	13.2942	31.7306	20.9249	23.5336	1.66796	0.738083	0.00598813	0.0434737
CSTF2	13.27	17.3213	12.7162	24.3413	23.6152	19.6114	1.6119	0.688764	0.00599395	0.0434922
DARS2	36.3484	28.7376	30.0565	53.4639	36.4691	58.121	1.54903	0.631363	0.00600505	0.0435489
gene:ENSG00000284906	24.2323	27.5566	28.0334	20.4293	8.66889	16.4022	-1.73361	-0.793776	0.00601088	0.0435674
C9orf64	8.65438	7.87331	7.51412	18.256	9.56567	16.4022	1.8486	0.886432	0.00601427	0.0435682
PSMB5	92.8903	125.186	78.3202	135.181	150.36	143.341	1.45301	0.539048	0.00605275	0.0438231
TM6SF1	6.34654	9.84163	6.3581	3.25999	3.2882	2.85256	-2.29093	-1.19593	0.00606118	0.0438602
CBWD3	8.94286	11.81	7.22512	13.04	19.7292	16.4022	1.76637	0.820787	0.00610039	0.0441078
RAP2A	49.9069	59.8371	53.1768	49.7692	23.0174	27.8125	-1.60354	-0.681258	0.00610203	0.0441078
HINT1	71.2544	154.71	58.9569	145.613	153.35	166.875	1.6385	0.712379	0.00610754	0.0441237
CHKA	25.3862	30.3122	37.5706	17.1693	22.4195	17.8285	-1.63187	-0.706524	0.00612348	0.0442148
ATG16L2	17.5972	16.5339	36.9926	13.2573	14.9464	11.7668	-1.78389	-0.835024	0.00614338	0.0443344
KCNE4	64.9078	72.8281	71.0951	34.7732	64.2693	35.657	-1.55104	-0.633238	0.0061791	0.0445273
NSUN5	13.27	14.9593	9.53715	17.604	26.0067	19.6114	1.68178	0.749986	0.00617866	0.0445273
NDUFA3	7.78894	20.8643	6.64711	19.56	26.6045	19.6114	1.89099	0.919143	0.00618016	0.0445273
IFNGR1	48.4645	40.9412	37.8596	35.4252	17.6367	23.8902	-1.6376	-0.711585	0.00620952	0.0446689
PRDX5	76.447	113.769	58.6679	107.797	141.691	121.947	1.49665	0.58174	0.00620515	0.0446689
CISD3	18.1742	20.4706	16.1843	27.1666	40.3552	23.5336	1.67017	0.739996	0.00620989	0.0446689
R3HCC1	12.1161	16.5339	13.5832	18.6906	24.8109	25.6731	1.62728	0.702466	0.00622275	0.0447372
OTUD1	10.6737	11.81	10.6932	6.95465	4.78283	5.34856	-1.87066	-0.90355	0.00623508	0.0448016
ITGA9	2.30783	1.57466	2.31204	0.217333	0.597854	0.35657	-5.24877	-2.39198	0.00624955	0.0448571
EXOSC7	8.65438	14.9593	9.24815	16.952	21.8217	16.4022	1.72324	0.785126	0.00624712	0.0448571
TMEM129	31.1558	26.3756	27.1664	38.6852	41.8498	50.2764	1.51033	0.594862	0.00626257	0.0449262
KCMF1	79.6203	100.778	102.308	66.9385	57.0951	70.2444	-1.45217	-0.538207	0.00627805	0.0449887
GLI4	8.65438	6.69231	6.3581	12.1706	16.441	12.48	1.86027	0.89551	0.00627506	0.0449887
GEMIN6	4.61567	9.84163	2.89005	13.04	9.86459	12.48	2.11486	1.08057	0.00628497	0.0450141
MLLT11	32.5982	24.8009	24.2764	54.1159	37.3659	36.3702	1.57315	0.653654	0.00632573	0.0452329
GNPNAT1	102.41	97.2353	112.134	93.0184	58.2908	62.3998	-1.45092	-0.536964	0.00632489	0.0452329
MYH3	2.01936	1.181	2.02303	0.434666	0	0	-8.20317	-3.03618	0.00631997	0.0452329
PCDH9	49.6184	58.2625	66.4711	106.276	69.3511	82.3678	1.48503	0.570491	0.00633775	0.0452701
INPP5J	0.576959	2.75566	5.20208	0.869331	0.298927	0	-6.11605	-2.6126	0.00633511	0.0452701
gene:ENSG00000285000	9.23134	14.5656	2.89005	4.78132	0.597854	3.20913	-3.0228	-1.59588	0.00634421	0.0452919
HELZ	77.3125	63.3801	98.2616	56.7239	52.6112	52.4159	-1.48152	-0.567078	0.00636403	0.0454091
FGF1	0.576959	0	0.867014	3.25999	2.69034	1.78285	4.83933	2.27481	0.00637487	0.0454133
PAPSS2	157.51	148.805	177.738	116.49	110.902	118.738	-1.40561	-0.4912	0.00637224	0.0454133
PTPN2	32.8866	32.6742	28.3225	22.1679	19.1313	16.0457	-1.58992	-0.668955	0.00636865	0.0454133
SERTAD2	24.2323	25.9819	40.7496	22.3853	14.0496	17.1154	-1.68841	-0.755662	0.00640226	0.0455839
DIAPH1	126.354	142.113	219.065	104.754	110.304	117.668	-1.4675	-0.553361	0.00641514	0.0456512
ADAMTSL4	45.8682	31.0996	51.4428	29.9919	19.4303	31.0216	-1.60338	-0.681116	0.00644765	0.045858
USP7	171.357	164.946	209.817	132.138	118.973	138.349	-1.4062	-0.491799	0.0064638	0.0459483
SLC25A36	65.4848	49.2082	43.6397	44.5532	23.9142	31.0216	-1.58184	-0.6616	0.00647687	0.0460166
NPM1	877.554	931.806	889.556	632.438	611.605	616.154	-1.4483	-0.534361	0.00648541	0.0460526
RIMS2	2.01936	1.96833	3.75706	0.651998	0.298927	0.713141	-4.49612	-2.16868	0.00651854	0.0462632
NBAS	133.854	118.887	121.382	96.9304	75.0307	92.7083	-1.41152	-0.497252	0.00653309	0.0463417
KBTBD2	58.2728	54.3258	60.402	48.6825	35.8713	30.6651	-1.48167	-0.567228	0.00653911	0.0463597
PTPN13	200.782	137.389	159.242	129.748	99.5427	116.599	-1.43856	-0.524626	0.00657006	0.0465295
ARHGEF17	84.5244	66.5294	117.625	121.924	144.681	128.009	1.463	0.548926	0.00656981	0.0465295
ZBTB43	30.8673	23.6199	34.9696	22.1679	17.3378	15.3325	-1.61712	-0.693424	0.00658498	0.0465607
ARF3	127.219	114.163	111.267	158.653	188.922	150.473	1.41112	0.496844	0.00658473	0.0465607
ANP32A	54.5226	53.1448	43.3507	70.8505	85.7921	66.6787	1.48345	0.56896	0.0065836	0.0465607
DHCR24	129.239	137.389	152.594	169.52	242.43	190.052	1.43381	0.51985	0.00659281	0.0465913
NEMP1	49.33	44.8778	46.2407	37.8159	22.4195	31.3782	-1.52037	-0.60442	0.00661745	0.046716
SLC17A9	3.75023	9.84163	6.93611	0.434666	4.48391	1.78285	-3.07551	-1.62082	0.00661749	0.046716
IPO5	358.291	394.453	497.377	312.959	251.996	290.248	-1.46132	-0.547273	0.00662867	0.0467702
CSNK1G1	49.0415	36.6109	54.6219	36.9466	26.3056	28.1691	-1.52947	-0.613034	0.00667643	0.0470821
HIF3A	10.6737	16.9276	22.8314	25.2106	31.6863	26.7428	1.65477	0.726631	0.00669943	0.0472193
FUNDC2	19.0396	29.1312	17.6293	28.9053	36.1702	37.0833	1.56606	0.647143	0.00671572	0.047309
PSMA7	125.777	164.158	126.006	169.737	224.195	201.462	1.43351	0.519554	0.00674801	0.0475113
MRPL17	23.0783	25.9819	12.7162	29.7746	33.4798	36.3702	1.62124	0.6971	0.00675963	0.0475679
TAOK3	66.0618	70.4661	102.019	56.0719	52.6112	51.7027	-1.48793	-0.573309	0.00678431	0.0477163
ZNF143	22.5014	24.0136	35.8366	17.604	20.327	9.98397	-1.70534	-0.770062	0.00679837	0.0477899
TCIM	0.865438	2.75566	1.73403	0.217333	0	0	-13.2496	-3.72788	0.00681165	0.0478327
SERPINB8	46.4452	40.1539	36.4146	28.9053	29.2949	19.6114	-1.55849	-0.640152	0.00681065	0.0478327
BEX2	2.88479	2.36199	2.89005	0.434666	0.896781	0.713141	-4.04175	-2.01498	0.00685915	0.0481408
TRIM21	10.3853	15.3529	11.2712	18.6906	20.327	21.7508	1.65887	0.730204	0.00687175	0.048153
LRIG3	19.6166	21.2579	21.9644	38.2506	26.9034	31.7348	1.56217	0.643556	0.00686799	0.048153
SMURF2	107.603	106.29	114.446	86.4985	71.4436	75.5929	-1.39348	-0.478691	0.00686965	0.048153
TRIM37	45.8682	46.8462	41.6167	34.1212	26.9034	26.7428	-1.49204	-0.577286	0.0068778	0.04817
NUBP2	20.7705	22.8326	23.9874	30.4266	42.7466	33.5176	1.56843	0.649323	0.00692464	0.0484724
C8orf82	15.0009	17.7149	17.3403	23.9066	27.5013	27.8125	1.57075	0.651456	0.00693395	0.0485121
TMEM120A	13.847	22.8326	17.0513	22.8199	34.3766	30.3085	1.63608	0.710244	0.00694116	0.048537
COX7B	32.5982	58.2625	25.7214	60.4185	64.8672	57.7644	1.58181	0.66158	0.00694501	0.0485384
ILK	132.412	155.891	144.213	171.476	237.946	207.524	1.42564	0.511606	0.00695047	0.048551
PITPNB	77.3125	83.8507	82.3663	61.2878	49.9208	54.9118	-1.44667	-0.532733	0.00695573	0.0485622
ZNF721	19.9051	18.5023	26.5884	14.344	12.5549	14.2628	-1.59277	-0.671539	0.00696024	0.0485682
G6PC3	37.7908	40.5475	34.1025	43.6839	70.5468	54.1987	1.49505	0.580194	0.00697035	0.0486133
DNAH12	2.59631	1.181	1.44502	0.434666	0	0	-8.20316	-3.03618	0.00697819	0.0486424
HAX1	40.3871	47.2398	30.6345	53.0292	65.764	55.2684	1.48153	0.567085	0.00698726	0.0486801
CYLD	66.6387	57.4751	61.847	42.8146	48.1273	36.7268	-1.45506	-0.541082	0.00699772	0.0487274
PCDH1	2.59631	3.54299	2.89005	0.651998	1.19571	0.35657	-3.83238	-1.93824	0.00701175	0.0487741
PEDS1	42.9834	38.1855	34.1025	52.1599	53.508	63.4695	1.44994	0.535994	0.00700949	0.0487741
UTP3	24.2323	21.6516	16.4733	33.0346	31.0884	31.7348	1.54791	0.630319	0.00703128	0.0488843
CIB1	24.5207	40.1539	19.3633	35.8599	52.9101	45.641	1.60926	0.686394	0.00704246	0.0489292
GEMIN8	6.9235	7.08598	5.78009	12.1706	12.5549	12.48	1.88402	0.913818	0.0070451	0.0489292
LRRC37B	10.0968	11.0226	10.4042	6.30265	4.48391	5.70513	-1.86884	-0.902144	0.00708244	0.0491629
DPM3	2.01936	5.11765	2.31204	7.17198	8.36996	5.34856	2.37123	1.24564	0.00710919	0.0492552
PRUNE2	57.1189	20.8643	37.2816	25.2106	5.08176	24.9599	-2.08569	-1.06053	0.00710408	0.0492552
CTDSPL2	32.0212	38.5792	37.8596	32.3826	10.4624	19.2548	-1.73008	-0.790842	0.00710568	0.0492552
SRR	10.6737	12.991	7.51412	18.4733	17.3378	14.6194	1.68243	0.750546	0.00711056	0.0492552
COL5A2	965.252	930.231	1141.28	1659.99	1156.85	1685.51	1.4824	0.567938	0.00711494	0.0492599
WAPL	92.0249	81.4887	81.7883	71.2852	48.4262	51.3461	-1.48039	-0.565976	0.00714015	0.0493832
PABPC1L	21.059	21.2579	31.5015	12.388	17.9356	14.6194	-1.66504	-0.735557	0.00714018	0.0493832
ERG28	20.7705	27.1629	19.9413	26.9493	45.138	37.7965	1.61924	0.695317	0.00716062	0.0494988
HECA	38.9447	36.6109	43.9287	30.6439	22.1206	22.1074	-1.5697	-0.650489	0.00716934	0.0495333
TRIM32	25.0977	18.8959	17.9183	36.2946	27.8002	32.8045	1.566	0.647082	0.00719964	0.049691
C1QTNF6	10.3853	9.0543	6.93611	15.2133	13.4517	17.8285	1.74802	0.80572	0.00719892	0.049691
KAT14	17.5972	11.4163	14.7392	21.2986	25.4088	27.8125	1.63757	0.711553	0.00720816	0.0497239
RAB11B	62.6	61.4118	77.7422	81.7171	112.696	98.0569	1.44078	0.526849	0.00722324	0.0498021
TTLL7	51.0608	41.7285	49.1308	37.1639	21.5228	33.8742	-1.53027	-0.613786	0.00723609	0.0498391
KHSRP	241.746	272.023	362.99	191.905	209.847	203.958	-1.44883	-0.534887	0.0072349	0.0498391
MYCBP	10.9622	7.87331	5.78009	15.2133	14.9464	13.5497	1.77969	0.831627	0.00725918	0.0498431
PEX6	22.5014	18.8959	15.6062	29.9919	29.8927	31.7348	1.5992	0.677348	0.00725704	0.0498431
SMURF1	68.6581	62.5928	84.1003	45.6399	46.9316	56.6947	-1.46038	-0.546345	0.00725349	0.0498431
PMP22	6.05807	6.29865	5.20208	12.6053	8.36996	11.7668	1.89806	0.924523	0.00724973	0.0498431
SUPT4H1	27.1171	44.8778	20.2303	47.3786	56.7962	42.4319	1.60378	0.681479	0.00724499	0.0498431
ATP5PD	76.447	84.2444	58.0899	94.7571	108.212	105.545	1.41441	0.500197	0.0072569	0.0498431
NYNRIN	32.3097	42.9095	42.7727	55.8545	51.7144	63.8261	1.45389	0.539922	0.00727172	0.0498777
MED1	123.758	122.43	146.236	93.2358	97.1513	92.7083	-1.3918	-0.476947	0.00726846	0.0498777
VPS16	34.329	31.4932	38.1486	44.9879	61.2801	49.2067	1.47972	0.565329	0.0072778	0.0498936
CEBPD	45.2913	46.0588	28.3225	58.2452	59.7854	58.4775	1.48304	0.568554	0.0073085	0.0500525
PTEN	119.719	109.439	98.5506	94.9744	59.4865	72.0272	-1.43974	-0.525807	0.00730758	0.0500525
C3orf62	4.61567	5.90498	8.95914	2.17333	3.58713	2.13942	-2.48119	-1.31103	0.00731763	0.0500892
TREM1	3.17327	3.93665	2.60104	1.52133	0.298927	0	-4.10505	-2.0374	0.00732778	0.0501329
RNASEL	15.0009	9.44797	7.80312	18.4733	16.1421	21.7508	1.72265	0.784634	0.00733556	0.0501574
RAB8A	55.965	48.8145	43.6397	66.7212	76.2264	74.1666	1.45082	0.536873	0.00733891	0.0501574
CASP6	11.2507	10.2353	8.67014	14.344	17.0388	20.3245	1.66877	0.738788	0.00734798	0.0501678
CNOT1	297.999	287.769	373.972	224.07	219.114	226.779	-1.43475	-0.520798	0.00734652	0.0501678
OXSR1	94.6212	103.534	128.318	80.6305	77.1232	74.1666	-1.40622	-0.491823	0.00737089	0.0502468
ATAD5	10.6737	8.66064	11.8492	7.38932	2.98927	4.63542	-2.00333	-1.0024	0.00736911	0.0502468
BCAP31	85.6784	109.439	85.2564	106.928	169.791	130.148	1.45228	0.538321	0.00736436	0.0502468
EIF2B4	32.0212	35.0362	36.7036	41.7279	62.7747	51.3461	1.49324	0.578444	0.00737867	0.050274
LYPLA2	32.3097	33.0679	27.4554	36.7292	63.9704	43.145	1.54728	0.629737	0.00738602	0.0502973
ATP5MC2	68.6581	88.5747	58.9569	84.9771	122.859	103.762	1.44426	0.530329	0.00738965	0.0502973
FAM234A	68.3696	75.5837	78.6093	101.494	102.831	103.762	1.38435	0.469208	0.00741544	0.0504212
NR1H2	57.4074	51.9638	46.5297	65.6345	94.162	70.9575	1.47657	0.562245	0.0074135	0.0504212
CEP83	10.0968	10.2353	13.5832	7.38932	3.2882	6.41827	-1.94806	-0.962036	0.00742869	0.0504854
PEX11B	18.1742	11.81	8.09213	18.6906	31.0884	17.472	1.75993	0.815515	0.00743746	0.0505193
SEMA5A	99.2369	113.769	110.978	139.31	188.922	132.644	1.4239	0.509847	0.00745406	0.0505203
ZHX2	9.23134	11.81	14.4502	6.08532	7.17425	4.99199	-1.92172	-0.942397	0.00745601	0.0505203
NPC2	42.118	78.3394	43.0617	76.2838	95.9556	80.5849	1.55423	0.636203	0.0074417	0.0505203
ANKRD9	15.0009	17.3213	17.6293	24.5586	24.512	30.3085	1.57092	0.651612	0.00745325	0.0505203
DCUN1D3	19.9051	14.5656	10.4042	26.9493	24.2131	23.1771	1.66182	0.73276	0.00745734	0.0505203
WDR45B	79.3318	103.534	97.9726	59.9839	69.3511	65.9655	-1.4373	-0.523362	0.00746042	0.0505203
SMC6	53.0802	52.7512	58.0899	46.2919	21.8217	37.0833	-1.55074	-0.632956	0.00747654	0.0506037
SLC35E1	105.872	99.5973	119.07	70.6332	90.276	70.9575	-1.40548	-0.491063	0.00748766	0.0506531
SPA17	7.21198	6.69231	6.3581	16.952	8.66889	13.1931	1.93771	0.954356	0.00750275	0.0507278
ALKBH7	10.0968	14.9593	4.91308	16.7346	22.7185	14.6194	1.83255	0.873855	0.00750633	0.0507278
KBTBD6	15.8664	10.629	9.53715	23.0373	16.7399	21.3942	1.69186	0.758611	0.00753374	0.0508806
gene:ENSG00000288725	11.2507	16.5339	9.24815	9.77998	0	0	-3.70667	-1.89013	0.00753659	0.0508806
SLC2A13	25.3862	17.7149	17.3403	13.4746	7.7721	13.9062	-1.72139	-0.783576	0.00755191	0.0509582
RNF167	54.5226	56.6878	45.6627	66.5038	85.7921	77.0192	1.45999	0.545958	0.00755842	0.0509762
CDH11	14.1355	24.8009	24.8544	44.5532	21.8217	43.5016	1.72818	0.789252	0.0075735	0.0510016
CCDC68	53.6572	48.4208	45.0847	43.6839	14.3485	28.8822	-1.68398	-0.751875	0.0075737	0.0510016
SPTLC3	6.9235	5.11765	2.02303	16.952	2.98927	16.0457	2.55436	1.35296	0.00756843	0.0510016
EMG1	23.0783	26.7692	18.2073	29.3399	41.5509	36.7268	1.58343	0.663049	0.00758738	0.0510679
MICOS10	18.4627	31.0996	14.7392	37.5986	37.9637	27.0994	1.62108	0.696956	0.007597	0.0510809
PRR5L	7.78894	17.3213	8.09213	27.1666	10.1635	27.4559	1.96974	0.978009	0.00759668	0.0510809
PCNX2	45.5797	33.4616	58.3789	25.2106	32.5831	31.3782	-1.55864	-0.640287	0.00761875	0.0511993
RAMAC	12.1161	9.44797	7.80312	16.3	17.9356	14.6194	1.66381	0.734495	0.00762232	0.0511993
MCTP1	6.9235	4.72398	6.3581	1.73866	3.88605	1.78285	-2.50827	-1.32669	0.00763806	0.0512791
RFPL3	0	1.57466	4.62407	0	0.298927	0	-15.8078	-3.98256	0.00764212	0.0512805
DALRD3	18.1742	19.2896	15.0282	24.1239	29.8927	27.4559	1.54662	0.629123	0.00766304	0.0513858
HSPA12A	30.5788	26.3756	27.4554	20.6466	12.256	20.3245	-1.58043	-0.660313	0.00766941	0.0513858
MBTD1	18.7512	20.4706	20.5193	14.7786	6.87532	12.48	-1.71863	-0.781259	0.00766708	0.0513858
KIF1B	117.7	122.43	156.351	100.842	81.6071	98.77	-1.41044	-0.496143	0.00769984	0.0514711
VANGL1	30.8673	27.1629	28.9005	46.0746	37.067	45.9976	1.48224	0.567784	0.0077015	0.0514711
ABTB1	15.8664	16.1403	11.5602	20.212	26.0067	24.9599	1.62071	0.696623	0.00769467	0.0514711
APEX2	19.6166	11.0226	12.7162	21.7333	28.0991	23.8902	1.66656	0.736874	0.00769626	0.0514711
CCNQ	12.1161	9.84163	7.80312	17.1693	13.4517	19.9679	1.68528	0.752992	0.00768877	0.0514711
BTG1	109.911	133.846	112.423	86.9331	88.7814	77.3758	-1.39068	-0.475789	0.00773891	0.0516951
SRGN	125.777	111.801	96.8165	170.606	142.588	155.465	1.40453	0.490091	0.00774612	0.0517173
HDDC3	6.63502	4.33032	5.20208	8.91064	13.7506	9.27083	1.91695	0.938815	0.00775951	0.0517547
EFTUD2	85.6784	92.5114	91.6145	115.404	131.827	128.365	1.38538	0.470283	0.00775674	0.0517547
HMBS	12.9816	20.4706	10.9822	23.2546	23.6152	24.6034	1.65689	0.728476	0.00779165	0.051943
TES	62.6	75.1901	80.9213	56.7239	45.4369	46.7107	-1.45452	-0.540543	0.00779799	0.0519547
NUBP1	13.847	12.5973	12.4272	16.3	30.4906	18.8982	1.67708	0.745955	0.00780122	0.0519547
RAD50	67.7926	66.5294	91.3255	67.5905	41.8498	34.9439	-1.55378	-0.635782	0.00781544	0.0519966
ZNF771	5.19263	8.26697	2.89005	10.8666	8.07103	13.1931	2.01463	1.01051	0.00781924	0.0519966
BORCS8	6.05807	5.11765	6.3581	10.8666	9.56567	13.1931	1.86699	0.90071	0.0078115	0.0519966
[truncated: 19,487 more rows]

## Sheet: Sheet2
Name	CPM	CPM	CPM	CPM	CPM	CPM	Fold change	Log fold change	P-value	FDR p-value
hsa-miR-126-3p	912.652	215.519	728.803	281009	7388.96	166353	244.987	7.93656	1.15664e-18	4.76535e-16
hsa-miR-204-5p	37.7205	86.2075	25.0448	29065.5	76.1231	8810.7	253.054	7.9833	1.96339e-12	4.04459e-10
hsa-miR-196b-5p	75.441	13.6248	10.0179	8698.86	2.70488	6894.37	156.712	7.29197	4.33617e-08	4.46625e-06
hsa-miR-139-5p	36.8005	150.615	37.5672	11441.2	126.743	8126.87	86.9938	6.44284	3.52681e-08	4.46625e-06
hsa-miR-139-3p	1.84002	0	5.00896	1137.36	0.386412	690.479	299.527	8.22654	8.00344e-06	0.000659483
hsa-miR-425-3p	82.8011	51.7741	180.322	0	0.386412	0	-493.642	-8.94732	1.8152e-05	0.00124644
hsa-miR-625-5p	0	9.66119	0	2197.02	95.8301	198.231	227.998	7.83288	2.56547e-05	0.00150996
hsa-miR-212-3p	153.642	142.193	95.1701	0.71939	0.386412	0	-396.609	-8.63157	3.24184e-05	0.00166955
hsa-miR-1910-5p	103.041	11.1475	220.394	0	0	0	-1510.5	-10.5608	7.82998e-05	0.00358439
hsa-miR-1237-3p	97.5213	0	170.304	0	0	0	-1200.73	-10.2297	0.000170487	0.00702407
hsa-miR-365a-3p	117.762	80.0145	27.5493	0.71939	0	0.289388	-218.907	-7.77417	0.000191685	0.00717946
hsa-miR-6780b-3p	0	0.990891	0	836.65	0	0.289388	601.655	9.23279	0.00035377	0.0121461
hsa-miR-1275	0	0	0	1411.44	0	52.3792	12878.5	13.6527	0.000425775	0.0134938
hsa-miR-6880-3p	42.3206	0	205.367	0	0	0	-1108.09	-10.1139	0.000683735	0.0190627
hsa-miR-7704	30.3604	13.8725	147.764	0	0	0	-858.71	-9.74603	0.000745039	0.0190627
hsa-miR-128-3p	72.681	105.034	7.51343	1.43878	0.386412	0.578775	-78.7496	-6.2992	0.000713172	0.0190627
hsa-miR-654-5p	201.483	227.162	135.242	3207.04	826.534	1226.14	9.27436	3.21325	0.000786567	0.0190627
hsa-miR-1292-3p	27.6004	0	185.331	0	0	0	-951.578	-9.89418	0.000951986	0.0206431
hsa-miR-361-5p	57.0408	51.0309	152.773	2.87756	1.15923	0.289388	-66.1018	-6.04662	0.000941024	0.0206431
hsa-miR-151a-3p	173.882	85.4644	0	2.15817	0	0	-121.345	-6.92297	0.0010722	0.0220874
hsa-miR-486-3p	53.3607	0	130.233	0.71939	0	0	-229.017	-7.83931	0.00126005	0.0235974
hsa-miR-10b-5p	0	0.495446	2.50448	0.71939	1.54565	286.204	117.282	6.87384	0.00120883	0.0235974
hsa-miR-134-5p	57.0408	66.8852	2.50448	0	0	0	-584.882	-9.192	0.0013533	0.0242417
hsa-miR-6799-3p	0	0	257.961	0	0	0	-1145.15	-10.1613	0.00144333	0.0247772
hsa-miR-494-5p	0	25.02	137.746	0	0	0	-727.781	-9.50736	0.0015781	0.0257496
hsa-miR-2110	103.041	34.6812	0	0	0	0	-626.521	-9.29122	0.00162497	0.0257496
hsa-miR-548k	57.0408	43.8469	2.50448	0	0	0	-480.152	-8.90735	0.00218406	0.0263289
hsa-miR-451a	42929.6	5458.32	3536.32	107901	140521	75810.3	6.24414	2.6425	0.00194433	0.0263289
hsa-miR-942-3p	0	0	0	624.43	0	0	5494.35	12.4237	0.00214812	0.0263289
hsa-miR-126-5p	0.920012	0	5.00896	28.7756	8.50106	272.893	68.9017	6.10647	0.00200498	0.0263289
hsa-miR-1236-3p	18.4002	0	125.224	0	0	0	-640.472	-9.32299	0.00223668	0.0263289
hsa-miR-4497	0	0	147.764	0	0	0	-655.222	-9.35584	0.00218929	0.0263289
hsa-miR-337-5p	0	38.6448	170.304	0	0	0.578775	-232.347	-7.86014	0.00182987	0.0263289
hsa-miR-345-5p	181.242	129.064	7.51343	4.31634	0.772823	0.289388	-62.0815	-5.95609	0.00188804	0.0263289
hsa-miR-6756-3p	0	0	0	989.88	0	0	8709.31	13.0883	0.00179288	0.0263289
hsa-miR-193a-3p	0	8.42258	105.188	0	0	0	-505.49	-8.98154	0.00254961	0.0291128
hsa-miR-369-3p	0	3.71584	72.6299	0	0	0	-337.574	-8.39906	0.0027597	0.0291128
hsa-miR-10400-5p	33.1204	0	92.6657	0	0	0	-561.693	-9.13364	0.00279827	0.0291128
hsa-miR-6793-3p	0	0	167.8	0	0	0	-744.352	-9.53984	0.00279108	0.0291128
hsa-miR-6823-3p	0	0	132.737	0	0	0	-588.354	-9.20054	0.00282649	0.0291128
hsa-miR-4435	68.0809	24.2768	0	0	0	0	-422.701	-8.7235	0.00311532	0.0313052
hsa-let-7a-3p	31.2804	55.9854	227.907	5.03573	2.31847	0.868163	-39.1485	-5.29089	0.00361275	0.0344529
hsa-miR-3605-5p	0	14.3679	117.71	0	0	0	-589.054	-9.20226	0.00365421	0.0344529
hsa-let-7c-5p	4835.58	4351.99	10614	19322.8	16257.5	19898.6	2.80368	1.48732	0.00376303	0.0344529
hsa-miR-6791-3p	0	0	100.179	0	0	0	-443.388	-8.79243	0.00376306	0.0344529
hsa-miR-1228-5p	0	0	142.755	0	0	0	-632.935	-9.30591	0.00403139	0.0361072
hsa-miR-154-3p	44.1606	35.9198	0	0	0	0	-369.823	-8.53069	0.00426981	0.037429
hsa-let-7e-5p	3114.24	1558.67	2031.13	9919.66	10231.4	9142.04	4.37036	2.12775	0.00440183	0.0377824
hsa-miR-655-5p	0	7.92713	145.26	0	0	0.289388	-266.934	-8.06034	0.00465616	0.0383668
hsa-miR-122-5p	0.920012	3.71584	0	10.7908	1.93206	206.333	39.094	5.28887	0.00459715	0.0383668
hsa-miR-1284	0	11.1475	0	910.028	81.1464	0	83.6851	6.3869	0.00482705	0.038995
hsa-miR-5100	44.1606	10.6521	2.50448	0	0	0	-266.74	-8.05929	0.00538985	0.0425505
hsa-miR-4659a-3p	57.0408	9.41347	0	0	0	0	-304.238	-8.24906	0.00547372	0.0425505
hsa-miR-532-3p	47.8406	7.67941	0	0	0	0	-254.998	-7.99434	0.00572407	0.0436726
hsa-miR-708-5p	0	104.539	0	0.71939	0	0	-125.365	-6.96999	0.00670881	0.0502551
hsa-miR-495-3p	40.4805	6.93624	0	0	0	0	-218.705	-7.77284	0.00776071	0.0551305
hsa-miR-329-3p	40.4805	16.3497	0	0	0	0	-263.564	-8.04201	0.00830703	0.0551305
hsa-miR-210-5p	29.4404	6.19307	0	0	0	0	-166.277	-7.37745	0.00823754	0.0551305
hsa-miR-374b-5p	63.4808	45.0855	5.00896	1.43878	0.772823	0.289388	-47.7471	-5.57734	0.00837835	0.0551305
hsa-miR-421	61.6408	22.0473	0	0.71939	0	0	-113.512	-6.8267	0.00802198	0.0551305
hsa-miR-129-5p	45.0806	24.5246	0	0	0	0	-321.789	-8.32997	0.00750311	0.0551305
hsa-miR-6803-3p	88.3212	0	0	0	0	0	-395.821	-8.62871	0.00819062	0.0551305
hsa-miR-671-3p	29.4404	10.4044	0	0	0	0	-187.051	-7.54729	0.00843014	0.0551305
hsa-miR-192-5p	0.920012	20.561	5.00896	926.574	0.772823	162.925	39.9375	5.31967	0.00919055	0.0591641
hsa-miR-543	35.8805	11.643	2.50448	0.71939	0	0	-75.4594	-6.23763	0.00964413	0.0592627
hsa-miR-4728-3p	45.0806	0	0	0	0	0	-203.242	-7.66705	0.00954064	0.0592627
hsa-miR-195-3p	61.6408	5.69762	0	0.71939	0	0	-88.5082	-6.46774	0.0093585	0.0592627
hsa-miR-1292-5p	51.5207	2.47723	0	0	0	0	-246.13	-7.94328	0.00978122	0.0592627
hsa-miR-4286	38.6405	2.97267	0	0.71939	0	0	-55.5347	-5.79532	0.0110954	0.062048
hsa-miR-92a-1-5p	32.2004	27.9927	0	0	0	0	-281.076	-8.13482	0.011195	0.062048
hsa-miR-6804-3p	57.0408	0	0	0	0	0	-256.533	-8.003	0.0112905	0.062048
hsa-miR-1229-3p	38.6405	0	0	0	0	0	-174.536	-7.44738	0.0112049	0.062048
hsa-miR-374b-3p	27.6004	4.70673	0	0	0	0	-150.713	-7.23566	0.0104232	0.062048
hsa-miR-6732-3p	35.8805	0	0	0	0	0	-162.231	-7.3419	0.0110399	0.062048
hsa-miR-6797-3p	34.9605	0	0	0	0	0	-158.128	-7.30495	0.0114422	0.062048
hsa-miR-4662a-5p	0	0	0	0	99.3078	44.5657	1268.74	10.3092	0.0114458	0.062048
hsa-miR-6849-3p	34.0404	0	0	0	0	0	-154.026	-7.26703	0.0127519	0.0642433
hsa-miR-1255b-5p	0	0	0	0	168.089	0	1481.25	10.5326	0.012207	0.0642433
hsa-miR-877-5p	57.9608	0	0	0	0	0	-260.631	-8.02586	0.0123495	0.0642433
hsa-miR-6777-3p	57.0408	0	0	0	0	0	-256.533	-8.003	0.0127863	0.0642433
hsa-miR-423-5p	69.9209	76.2986	5.00896	1092.03	561.07	260.159	12.3813	3.63009	0.0125842	0.0642433
hsa-miR-3909	0	34.9289	2.50448	0	0	0	-174.168	-7.44434	0.0122854	0.0642433
hsa-miR-10a-3p	33.1204	0	0	0	0	0	-149.923	-7.22808	0.0140409	0.0673479
hsa-let-7a-2-3p	0.920012	51.5263	0	0	0	0	-241.641	-7.91672	0.0137536	0.0673479
hsa-let-7a-5p	71026.8	59619	94917.2	209265	375322	194501	3.45411	1.78831	0.013883	0.0673479
hsa-miR-5701	0	53.7558	0	0	0	0	-244.497	-7.93367	0.014058	0.0673479
hsa-miR-629-3p	0	40.3788	2.50448	0	0	0	-198.522	-7.63315	0.0145218	0.0687698
hsa-miR-433-3p	22.0803	2.97267	0	0	0	0	-117.423	-6.87557	0.0155155	0.0726409
hsa-miR-4636	0	29.7267	0	0	0	0	-137.793	-7.10636	0.0162964	0.0754396
hsa-miR-548h-5p	0	45.8287	0	0	0	0	-209.275	-7.70926	0.0182431	0.0828722
hsa-miR-548o-3p	22.0803	0	0	0	0	0	-100.661	-6.65336	0.0183043	0.0828722
hsa-miR-4667-3p	0	0.247723	0	0	63.7579	0	125.557	6.97219	0.0185558	0.0830975
hsa-miR-26a-2-3p	23.0003	0	0	0	0	0	-104.769	-6.71107	0.0196114	0.0868808
hsa-miR-505-3p	14.7202	2.22951	0	0	0	0	-80.9454	-6.33888	0.0201319	0.0882377
hsa-miR-143-3p	1245.7	5575.25	5893.04	952.472	1552.22	92.8934	-4.89426	-2.29109	0.020569	0.0892046
hsa-miR-449a	0	0	0	52.5154	3.86412	1.15755	504.485	8.97867	0.021534	0.0924166
hsa-miR-30d-3p	48.7606	2.22951	0	0.71939	0	0.578775	-35.0512	-5.13139	0.0221688	0.0941604
hsa-miR-10395-3p	0	0	0	0	103.172	0	910.153	9.82997	0.0224948	0.09457
hsa-miR-4659b-3p	18.4002	0	0	0	0	0	-84.2204	-6.3961	0.0235654	0.09807
hsa-miR-3163	0	0	0	0	99.6942	0	879.559	9.78064	0.0240753	0.0991901
hsa-miR-548ay-5p	0	0	0	0	76.1231	0	672.202	9.39275	0.026574	0.0994267
hsa-miR-487a-3p	0	17.0929	0	0	0	0	-81.8867	-6.35556	0.0267873	0.0994267
hsa-miR-889-5p	0	26.2586	0	0	0	0	-122.42	-6.9357	0.0251711	0.0994267
hsa-miR-218-1-3p	0	0	0	0	78.4416	0	692.598	9.43587	0.0267061	0.0994267
hsa-miR-337-3p	3855.77	6600.57	7398.23	27872	8368.9	10380.3	2.61132	1.38478	0.0252289	0.0994267
hsa-let-7i-3p	0.920012	8.6703	157.782	3.59695	0.386412	0	-41.9696	-5.39127	0.0257929	0.0994267
hsa-miR-455-5p	29.4404	0	0	0	0	0.289388	-52.7909	-5.72222	0.0257089	0.0994267
hsa-miR-493-3p	680.809	1417.22	1670.49	0	459.057	174.501	-5.9441	-2.57146	0.0254539	0.0994267
hsa-let-7i-5p	23098.7	15132.9	27524.2	72464.1	54306.3	59648	2.83569	1.5037	0.0258777	0.0994267
hsa-miR-1294	0	28.2404	0	0	0	0	-131.203	-7.03566	0.02642	0.0994267
hsa-miR-211-5p	0	0	0	63.3063	0.386412	6.9453	620.482	9.27724	0.0245361	0.0994267
hsa-miR-6746-3p	134.322	10.1566	0	2646.63	0.386412	74.3726	18.7867	4.23164	0.0271127	0.0997361
hsa-miR-217-3p	0	0	0	0.71939	0	73.5045	656.298	9.35821	0.0273656	0.0997756
hsa-miR-362-5p	0	15.1111	0	0	0	0	-73.1541	-6.19287	0.028395	0.101728
hsa-miR-22-5p	0	28.7358	0	0	0	0	-133.4	-7.05961	0.0281727	0.101728
hsa-miR-744-3p	0	16.8452	0	0	0	0	-80.7943	-6.33618	0.0296906	0.104552
hsa-miR-3622a-3p	0	0	0	0	59.121	0	522.638	9.02967	0.0295606	0.104552
hsa-miR-323b-5p	0	0	0	0	85.0106	0	750.385	9.55149	0.0307732	0.107446
hsa-miR-377-5p	0	15.6065	0	0	0	0	-75.3357	-6.23526	0.0310665	0.107558
hsa-miR-188-5p	0	14.3679	0	0	0	0	-69.8839	-6.12689	0.0327404	0.112409
hsa-miR-548ad-5p	0	0	0	0	0	64.5334	570.849	9.15696	0.0338522	0.11447
hsa-miR-383-5p	0	20.0655	0	0	0	0.289388	-37.2959	-5.22095	0.0338963	0.11447
hsa-miR-129-2-3p	0	16.102	0	0	0	0	-77.5183	-6.27647	0.035775	0.116979
hsa-miR-92b-5p	0	0	0	0	47.915	0.289388	426.708	8.73711	0.0350934	0.116979
hsa-miR-4799-5p	0	0	0	0	0	66.2698	586.12	9.19505	0.0355337	0.116979
hsa-miR-26b-5p	563.047	140.459	157.782	1848.83	1488.84	774.112	4.76554	2.25264	0.0354268	0.116979
hsa-let-7d-5p	4698.5	8079.23	9091.25	11913.8	25291.4	9053.2	2.11549	1.08099	0.0374583	0.118991
hsa-miR-323b-3p	0	0	0	0	0	61.9289	547.942	9.09788	0.0371834	0.118991
hsa-miR-3195	203.323	4.45901	964.224	0	66.8492	34.7265	-11.4843	-3.5216	0.0372334	0.118991
hsa-miR-224-5p	0	0	0	0	0	46.0126	407.966	8.67231	0.0375458	0.118991
hsa-miR-3180-3p	0	7.43168	2.50448	0	0	0	-50.2859	-5.65208	0.0381823	0.120085
hsa-miR-29b-1-5p	0	7.92713	2.50448	0	0	0	-52.6016	-5.71704	0.0390075	0.121751
hsa-miR-374a-3p	0.920012	4.95446	0	0	0	0	-38.1044	-5.25188	0.0398929	0.123578
hsa-miR-137-3p	0	0.990891	0	0	0	72.3469	50.8917	5.66936	0.0404471	0.12436
hsa-let-7e-3p	660.569	809.31	746.334	5.03573	229.915	192.153	-5.1807	-2.37315	0.0416037	0.126938
hsa-miR-23b-5p	0.920012	5.4499	0	0	0	0	-39.8784	-5.31753	0.0419017	0.126938
hsa-miR-4516	0	0	0	0	32.845	0	291.511	8.18741	0.0438025	0.131727
hsa-miR-4448	0.920012	6.68852	0	0	0	0	-44.6858	-5.48174	0.0447881	0.133715
hsa-miR-219a-1-3p	0	11.643	0	0	0	0	-57.9214	-5.85602	0.0453229	0.133893
hsa-miR-200b-3p	0	0	0	17.9847	1.93206	1.44694	185.007	7.53143	0.0454975	0.133893
hsa-miR-655-3p	0	9.90891	0	0	0	0	-50.3395	-5.65362	0.0460952	0.134689
hsa-miR-1290	0	11.1475	0	0	0	0	-55.7522	-5.80096	0.0464826	0.134865
hsa-miR-34b-3p	0	9.90891	0	0	0	0	-50.3395	-5.65362	0.0469232	0.134959
hsa-miR-136-3p	0	10.4044	0	0	0	0	-52.5027	-5.71432	0.0471701	0.134959
hsa-miR-100-3p	0	9.90891	0	0	0	0	-50.3395	-5.65362	0.0480366	0.135555
hsa-miR-758-3p	0	9.16574	0	0	0	0	-47.1001	-5.55766	0.0477698	0.135555
hsa-miR-410-5p	0	15.6065	0	0	0	0.289388	-29.4656	-4.88096	0.0505971	0.137382
hsa-miR-377-3p	0	12.1384	0	0	0	0	-60.0926	-5.90911	0.0491767	0.137382
hsa-miR-664a-3p	0.920012	31.4608	0	1.43878	0	0	-23.3146	-4.54316	0.0500848	0.137382
hsa-miR-7706	0	9.66119	0	0	0	0	-49.259	-5.62231	0.0498008	0.137382
hsa-miR-4670-3p	0	0	0	0	0	25.7555	229.872	7.84469	0.0505676	0.137382
hsa-miR-3679-5p	0	9.90891	0	0	0	0	-50.3395	-5.65362	0.0506845	0.137382
hsa-miR-491-5p	0	7.92713	0	0	0	0	-41.7181	-5.3826	0.0517112	0.138716
hsa-miR-197-3p	3369.08	343.839	5319.51	559.685	1257.77	313.407	-4.23699	-2.08304	0.0518502	0.138716
hsa-miR-130b-3p	0	8.6703	0	0	0	0	-44.9444	-5.49007	0.052984	0.139932
hsa-miR-20a-5p	0	11.8907	2.50448	0	0.386412	0	-24.8246	-4.6337	0.0528312	0.139932
hsa-miR-539-5p	0	7.92713	0	0	0	0	-41.7181	-5.3826	0.0554211	0.145436
hsa-miR-30c-1-3p	0	8.17485	0	0	0	0	-42.7925	-5.41929	0.0558675	0.14568
hsa-miR-183-5p	107.641	35.6721	7.51343	709.318	408.824	201.414	8.62128	3.1079	0.0567162	0.146963
hsa-miR-1243	0	5.69762	0	0	0	0	-32.1114	-5.00501	0.0580004	0.147645
hsa-miR-296-5p	0	16.3497	2.50448	0.71939	0.386412	0	-17.1291	-4.09837	0.058379	0.147645
hsa-miR-144-5p	0	0	0	0	22.7983	0	203.154	7.66643	0.0591296	0.147645
hsa-miR-3174	0	8.17485	0	0	0	0	-42.7925	-5.41929	0.0577253	0.147645
hsa-miR-6747-3p	0	7.67941	0	0	0	0	-40.6448	-5.345	0.0588975	0.147645
hsa-miR-122b-5p	0	5.69762	0	0	0	0	-32.1114	-5.00501	0.058513	0.147645
hsa-miR-548l	0	6.19307	0	0	0	0	-34.2338	-5.09735	0.0665911	0.147766
hsa-miR-3129-3p	0	6.93624	0	0	0	0	-37.4324	-5.22621	0.0634304	0.147766
hsa-miR-618	0	4.95446	0	0	0	0	-28.9492	-4.85545	0.0661094	0.147766
hsa-miR-181a-5p	7591.94	20369.5	17701.6	9036.25	7993.7	5144.44	-2.05933	-1.04217	0.0638887	0.147766
hsa-miR-130b-5p	23.0003	288.845	2.50448	1522.95	347.77	474.885	7.41005	2.88948	0.0650751	0.147766
hsa-miR-671-5p	0	6.68852	0	0	0	0	-36.3644	-5.18446	0.0596441	0.147766
hsa-miR-185-3p	0	6.19307	0	0	0	0	-34.2338	-5.09735	0.0647958	0.147766
hsa-miR-656-5p	0	5.94535	0	0	0	0	-33.1714	-5.05187	0.0633884	0.147766
hsa-miR-550a-5p	0	5.69762	0	0	0	0	-32.1114	-5.00501	0.0609311	0.147766
hsa-miR-4423-5p	0	5.94535	0	0	0	0	-33.1714	-5.05187	0.0648855	0.147766
hsa-miR-3115	0	6.68852	0	0	0	0	-36.3644	-5.18446	0.0625694	0.147766
hsa-miR-548c-3p	0	4.95446	0	0	0	0	-28.9492	-4.85545	0.0661032	0.147766
hsa-miR-497-5p	0	0	0	9.35207	2.31847	0.578775	104.745	6.71073	0.0642954	0.147766
hsa-miR-1287-3p	0	4.95446	0	0	0	0	-28.9492	-4.85545	0.0664358	0.147766
hsa-miR-200a-3p	0	0	0	11.5102	2.70488	0.578775	127.435	6.99362	0.0607657	0.147766
hsa-miR-503-5p	0	5.20218	0	0	0	0	-29.9998	-4.90688	0.0643204	0.147766
hsa-miR-486-5p	1321.14	40.8743	2.50448	1343.1	5657.84	892.761	5.78263	2.53172	0.0655549	0.147766
hsa-miR-494-3p	0	7.43168	0	0	0	0	-39.5726	-5.30643	0.0602524	0.147766
hsa-miR-146a-5p	35.8805	48.5537	247.943	1257.49	40.9596	984.786	6.9175	2.79025	0.0624572	0.147766
hsa-let-7f-5p	22082.1	17355.7	30619.7	46301.4	80996.9	39352.1	2.37906	1.25039	0.0667101	0.147766
hsa-miR-1301-3p	0	5.69762	0	0	0	0	-32.1114	-5.00501	0.0611838	0.147766
hsa-miR-6770-3p	0	5.94535	0	0	0	0	-33.1714	-5.05187	0.0679632	0.148536
hsa-miR-18a-5p	0	5.94535	0	0	0	0	-33.1714	-5.05187	0.0682316	0.148536
hsa-let-7g-5p	12023.6	7683.62	11410.4	13371.3	41728.6	12635.5	2.1769	1.12227	0.0684223	0.148536
hsa-miR-184	0	5.94535	0	0	0	0	-33.1714	-5.05187	0.0684995	0.148536
hsa-miR-409-3p	793.97	1303.77	889.09	6459.4	1291.39	2929.47	3.57325	1.83724	0.0695913	0.150113
hsa-miR-135b-5p	31.2804	0.247723	20.0358	3.59695	0.772823	0	-11.8876	-3.57138	0.0711992	0.152782
hsa-miR-1273c	0	4.70673	0	0	0	0	-27.903	-4.80235	0.0736122	0.156936
hsa-let-7b-5p	29524.1	15977.9	33199.4	57276.4	87679.5	41580.9	2.37041	1.24513	0.0742781	0.156936
hsa-miR-190b-5p	0	4.70673	0	0	0	0	-27.903	-4.80235	0.0739947	0.156936
hsa-miR-10527-5p	0	4.70673	0	0	0	0	-27.903	-4.80235	0.0758595	0.159273
hsa-miR-616-3p	0	4.70673	0	0	0	0	-27.903	-4.80235	0.0761573	0.159273
hsa-miR-769-3p	0	2.72495	0	0	93.5116	0	28.7382	4.8449	0.0788313	0.162575
hsa-miR-6885-3p	0	4.21129	0	0	0	0	-25.8283	-4.69088	0.0789198	0.162575
hsa-miR-3164	0	4.45901	0	0	0	0	-26.8623	-4.74751	0.0787658	0.162575
hsa-miR-624-5p	0	4.21129	0	0	0	0	-25.8283	-4.69088	0.0796218	0.163205
hsa-miR-513b-5p	0	4.21129	0	0	0	0	-25.8283	-4.69088	0.0803175	0.163816
hsa-miR-4732-3p	241.963	7.18396	5.00896	614.359	1347.03	81.0285	8.01604	3.00289	0.0845975	0.171695
hsa-miR-877-3p	0	5.4499	0	0	0	0.289388	-11.9763	-3.58211	0.0903365	0.182444
hsa-miR-34c-3p	70.8409	45.3333	0	7.1939	1.15923	0	-14.1259	-3.82028	0.0916674	0.183335
hsa-miR-1285-5p	0	0	0	0	0	10.9967	100.272	6.64778	0.0913202	0.183335
hsa-miR-598-3p	0	8.17485	0	0	0.386412	0	-15.1163	-3.91803	0.0942387	0.186665
hsa-miR-125a-5p	716.689	1558.92	638.642	3446.6	5707.69	1561.25	3.67109	1.87621	0.0938697	0.186665
hsa-miR-429	0.920012	0	10.0179	114.383	15.0701	6.9453	14.8199	3.88946	0.0956499	0.188554
hsa-miR-652-3p	551.087	106.273	2.50448	1115.05	869.04	777.295	4.17755	2.06266	0.0966634	0.189021
hsa-miR-301a-3p	0.920012	8.91802	2.50448	1.43878	0	0	-11.2465	-3.49141	0.0968046	0.189021
hsa-miR-29c-3p	30.3604	3.46812	0	2.15817	1.15923	0.289388	-9.66475	-3.27273	0.107726	0.208372
hsa-miR-98-5p	1598.98	1430.85	2151.35	4235.77	4398.52	4977.47	2.64242	1.40186	0.107452	0.208372
hsa-miR-214-3p	102.121	200.655	380.681	5.75512	81.1464	0	-7.82938	-2.9689	0.109971	0.21172
hsa-miR-505-5p	0	1.48634	0	0	0.386412	37.0416	18.241	4.18911	0.113074	0.216681
hsa-miR-193a-5p	179.402	154.331	663.687	1.43878	77.2823	102.154	-5.48517	-2.45554	0.118203	0.225461
hsa-miR-29a-3p	0	56.4808	0	673.349	1.15923	1.15755	11.825	3.56377	0.121225	0.229104
hsa-miR-7-5p	12336.4	12148.3	12845.5	14831.7	37311.1	16939.3	1.85063	0.88802	0.121125	0.229104
hsa-miR-542-5p	95.6813	232.612	157.782	0	50.2335	0	-9.61886	-3.26587	0.125772	0.236612
hsa-miR-320a-3p	771.89	386.448	558.499	10.7908	279.762	213.279	-3.402	-1.76638	0.129799	0.241504
hsa-miR-193b-3p	284.284	217.748	450.806	3.59695	154.951	0	-5.99543	-2.58386	0.130018	0.241504
hsa-miR-323a-5p	45.0806	46.0764	220.394	1140.23	329.996	124.726	5.17268	2.37091	0.130131	0.241504
hsa-miR-485-5p	689.089	996.341	966.728	6418.39	547.545	1708.54	3.27046	1.7095	0.151459	0.279737
hsa-miR-193b-5p	0	5.20218	0	0	91.1931	0	15.81	3.98276	0.152849	0.279737
hsa-miR-3187-3p	0	13.8725	0	0	166.93	0	11.5783	3.53335	0.153448	0.279737
hsa-miR-218-5p	117.762	122.623	120.215	10.0715	50.6199	2.02571	-5.7192	-2.51581	0.152972	0.279737
hsa-miR-9-5p	0.920012	0.495446	0	1.43878	3.09129	3.18326	4.98401	2.31731	0.157219	0.285349
hsa-miR-4510	17.4802	5.94535	32.5582	85.6074	105.877	65.9804	5.27745	2.39984	0.159231	0.287733
hsa-miR-942-5p	0	43.1038	0	0.71939	166.543	179.131	7.87593	2.97745	0.164015	0.295083
hsa-miR-423-3p	7950.75	7231.52	13621.9	6507.6	4755.95	5382.61	-1.72947	-0.790326	0.165318	0.296134
hsa-let-7b-3p	254.843	44.3424	636.137	2.15817	169.635	0.289388	-5.41984	-2.43825	0.170082	0.30335
hsa-miR-1260b	747.97	61.683	1592.85	4.31634	362.068	369.259	-3.26171	-1.70563	0.171066	0.303789
hsa-miR-125b-1-3p	35.8805	106.273	100.179	890.604	136.017	162.346	4.90719	2.2949	0.173162	0.304883
hsa-miR-340-3p	0	3.96356	0	0.71939	0	0	-7.62149	-2.93007	0.173041	0.304883
hsa-miR-92a-3p	62836.8	48083.7	63751.5	100757	199534	52050.1	2.01718	1.01234	0.175533	0.306039
hsa-miR-148b-3p	0	3.71584	2.50448	0	78.4416	0	12.2914	3.61957	0.176047	0.306039
hsa-miR-339-5p	0	3.96356	0	0.71939	0	0	-7.62149	-2.93007	0.175803	0.306039
hsa-miR-155-5p	342.245	953.485	353.131	1050.31	2685.17	996.362	2.8618	1.51692	0.179641	0.310424
hsa-miR-182-5p	315.564	26.5063	27.5493	1092.03	221.8	198.809	4.08203	2.02929	0.180076	0.310424
hsa-miR-16-5p	4358.1	1285.93	989.269	4094.77	9573.35	2084.17	2.37418	1.24743	0.182256	0.312873
hsa-miR-194-5p	32.2004	7.92713	2.50448	5.75512	0.386412	0	-7.34881	-2.87751	0.184636	0.315643
hsa-miR-223-3p	3.68005	0	7.51343	20.8623	5.02335	48.9065	7.87993	2.97818	0.192474	0.327682
hsa-miR-212-5p	0	6.93624	0	0	85.0106	0	11.321	3.50093	0.196987	0.333986
hsa-miR-363-3p	0	5.20218	125.224	832.334	0	101.575	7.20201	2.8484	0.197813	0.334012
hsa-miR-1249-3p	30.3604	0	2.50448	4.31634	1.15923	0.289388	-5.7526	-2.52421	0.198834	0.334365
hsa-miR-490-5p	1034.09	2117.78	1840.79	0.71939	1248.11	0	-3.99702	-1.99892	0.203879	0.341455
hsa-miR-33a-5p	0	16.8452	0	2.15817	0.386412	0	-6.99539	-2.8064	0.213257	0.355715
hsa-miR-6819-3p	123.282	6.93624	180.322	1045.27	143.359	67.4273	4.06317	2.02261	0.21528	0.357643
hsa-miR-382-3p	0	4.70673	0	0	0	55.5624	10.4968	3.39188	0.222225	0.367697
hsa-miR-1260a	53716.7	6104.39	72607.3	32335.8	26528.3	8244.65	-1.9733	-0.980611	0.2236	0.368492
hsa-miR-1306-5p	0.920012	7.18396	0	0	78.828	0	8.99897	3.16976	0.228234	0.374631
hsa-miR-15b-3p	0	5.20218	2.50448	0	77.6687	0	9.74282	3.28434	0.229885	0.375844
hsa-miR-766-3p	0.920012	16.8452	0	0	0.772823	129.356	7.02205	2.81189	0.238933	0.389092
hsa-miR-935	0	5.94535	0	0	0	57.8775	8.85721	3.14685	0.248316	0.402781
hsa-miR-148a-3p	0.920012	0	2.50448	9.35207	1.15923	0.289388	4.60402	2.20289	0.251513	0.406366
hsa-miR-1180-3p	828.931	586.608	816.46	1669.7	1702.92	1677	2.28634	1.19304	0.253251	0.407575
hsa-miR-132-5p	330.284	975.285	1542.76	430.195	716.407	149.613	-2.19526	-1.13439	0.25457	0.408105
hsa-miR-199a-5p	175.722	835.074	92.6657	20.8623	253.872	0.289388	-4.01189	-2.00428	0.263306	0.420473
hsa-miR-149-5p	10162.5	5028.77	9574.62	3808.45	8735.99	838.356	-1.85046	-0.887888	0.266944	0.424637
hsa-miR-214-5p	0.920012	40.6265	5.00896	5.75512	1.15923	1.15755	-6.10867	-2.61086	0.268741	0.425851
hsa-let-7f-2-3p	0	8.91802	0	0.71939	1.15923	0	-5.07757	-2.34414	0.277859	0.438613
hsa-miR-145-5p	2.76004	118.164	10.0179	30.9338	3.86412	1.44694	-3.67442	-1.87752	0.283161	0.445275
hsa-miR-206	41.4005	5.4499	115.206	30.9338	3.4777	1.73633	-4.46373	-2.15825	0.290272	0.454723
hsa-miR-576-5p	23.0003	80.5099	165.296	687.737	126.743	95.2085	3.40866	1.7692	0.293869	0.458613
hsa-miR-432-3p	0.920012	3.2204	0	0	0	24.5979	5.15608	2.36627	0.296006	0.45948
hsa-miR-19b-3p	54.2807	10.6521	12.5224	11.5102	2.31847	1.44694	-5.28886	-2.40296	0.296655	0.45948
hsa-miR-574-3p	1064.45	1334.23	1239.72	22.3011	1142.62	340.609	-2.41584	-1.27253	0.300442	0.463604
hsa-miR-1307-3p	16.5602	71.3442	47.5851	0	0.386412	33.2796	-3.97221	-1.98994	0.301888	0.464096
hsa-miR-23a-3p	2708.52	10725.9	8279.8	10418.2	11614.4	11185.7	1.52976	0.613302	0.307645	0.471188
hsa-miR-33b-3p	0	6.44079	0	0	0	41.6718	5.92265	2.56624	0.310315	0.473518
hsa-miR-142-5p	12.8802	0	2.50448	3.59695	0.386412	0	-3.9341	-1.97603	0.319923	0.486377
hsa-miR-1304-3p	29.4404	45.0855	127.728	485.588	67.622	164.372	3.60364	1.84945	0.326284	0.494225
hsa-miR-191-3p	0	9.41347	0	0	62.2123	0	6.22782	2.63873	0.332543	0.500029
hsa-miR-496	0	44.0947	210.376	0	0	58.7457	-4.29844	-2.10381	0.332487	0.500029
hsa-miR-1468-5p	0	55.7376	0	0.71939	242.667	0	4.32524	2.11278	0.338754	0.502039
hsa-miR-3130-5p	0	6.93624	0	0	42.8917	0	5.69854	2.51059	0.338126	0.502039
hsa-miR-196a-5p	5.52007	5.94535	17.5313	2.87756	0.772823	2.60449	-3.22966	-1.69138	0.337575	0.502039
hsa-miR-5581-3p	0	90.4188	220.394	758.237	149.928	88.2632	3.21483	1.68474	0.338071	0.502039
hsa-miR-487a-5p	189.523	220.721	368.158	939.523	479.15	397.908	2.35122	1.23341	0.341834	0.503202
hsa-miR-299-5p	0	16.5974	0	0.71939	91.1931	0	5.33235	2.41477	0.341982	0.503202
hsa-miR-376b-3p	46.9206	209.078	122.719	0	49.8471	45.4339	-3.95769	-1.98466	0.344426	0.503413
hsa-miR-432-5p	244.723	302.965	425.761	0.71939	759.685	1580.06	2.40531	1.26622	0.344569	0.503413
hsa-miR-29b-3p	25.7603	22.5428	137.746	548.894	62.9851	43.1188	3.56642	1.83448	0.360334	0.524586
hsa-miR-3135b	114.082	325.012	658.678	1.43878	347.384	0	-3.14327	-1.65227	0.367313	0.532863
hsa-miR-199b-5p	173.882	745.893	245.439	10.0715	388.73	0	-2.92097	-1.54645	0.370997	0.536319
hsa-miR-199a-3p	777.41	4527.13	1297.32	182.006	2747.39	53.2473	-2.21355	-1.14636	0.390744	0.562889
hsa-miR-30b-5p	46.0006	62.9216	7.51343	62.5869	269.329	4.91959	2.85584	1.51392	0.399551	0.573572
hsa-miR-140-5p	51.5207	6.44079	0	13.6684	1.15923	0.578775	-3.83794	-1.94033	0.404955	0.57931
hsa-miR-30d-5p	310.964	114.448	453.31	68.342	239.189	66.2698	-2.33711	-1.22473	0.407044	0.580285
hsa-miR-487b-5p	0	8.17485	0	0	0	35.3053	4.02986	2.01073	0.414628	0.589058
hsa-miR-375-3p	10.1201	1.73406	40.0716	87.0461	13.5244	47.4596	3.034	1.60122	0.434796	0.615587
hsa-miR-376c-3p	238.283	683.963	127.728	1029.45	179.295	716.813	1.82703	0.869503	0.445428	0.628481
hsa-miR-1270	0	13.1293	0	0	57.5753	0	4.20622	2.07252	0.458349	0.641863
hsa-miR-127-3p	66200.4	142373	117350	300583	83920.1	105157	1.50237	0.587244	0.459586	0.641863
hsa-miR-96-5p	35.8805	0.743168	25.0448	15.8266	2.31847	2.60449	-2.96201	-1.56657	0.458429	0.641863
hsa-miR-99a-5p	359.725	1976.08	713.776	1096.35	416.165	419.323	-1.58082	-0.660675	0.464464	0.644861
hsa-miR-411-5p	10847.9	37620.7	20867.3	24149.9	8294.71	16873.3	-1.40597	-0.491564	0.464864	0.644861
hsa-miR-130a-3p	0	7.67941	0	2.87756	0	0	-3.01651	-1.59288	0.46997	0.648316
hsa-miR-450a-5p	24.8403	53.5081	135.242	2.87756	80.3736	0	-2.54754	-1.34911	0.470501	0.648316
hsa-miR-221-3p	1030.41	2213.65	1728.09	2132.27	4846.76	1188.51	1.64243	0.715831	0.479728	0.656638
hsa-miR-30c-5p	0.920012	18.0838	7.51343	15.1072	2.70488	57.8775	2.7699	1.46983	0.478826	0.656638
hsa-miR-7977	3329.52	5042.4	6156.01	1765.38	6601.84	1142.79	-1.52744	-0.611113	0.485188	0.661911
hsa-miR-181d-5p	64.4009	119.898	7.51343	2.15817	0.386412	72.3469	-2.5601	-1.3562	0.488738	0.664397
hsa-miR-378a-5p	0	4.70673	0	2.15817	0.386412	0	-2.45712	-1.29697	0.491847	0.664397
hsa-miR-381-3p	0	196.692	137.746	616.517	138.335	43.4081	2.38541	1.25424	0.490301	0.664397
hsa-miR-21-3p	0	13.377	0	0	0	50.6428	3.6355	1.86215	0.493971	0.665086
hsa-miR-181b-5p	310.044	1165.29	455.815	40.2858	616.713	484.435	-1.69228	-0.758969	0.501064	0.672438
hsa-miR-181c-5p	0.920012	27.0018	313.06	28.0562	3.09129	107.073	-2.44933	-1.29239	0.517679	0.687999
hsa-miR-656-3p	0	19.5701	2.50448	0	0	66.5591	2.95027	1.56085	0.519095	0.687999
hsa-miR-31-5p	229.083	200.903	160.287	825.14	297.151	83.9224	2.03876	1.02769	0.522679	0.687999
hsa-miR-15a-5p	0	10.6521	2.50448	2.87756	0.772823	34.4371	2.73789	1.45306	0.521315	0.687999
hsa-miR-125b-5p	3452.81	8457.75	4525.59	2790.51	18516.5	2609.12	1.455	0.541014	0.516523	0.687999
hsa-miR-34a-5p	14628.2	19919.9	23133.9	21759.4	10398.7	12564.1	-1.28975	-0.367096	0.522373	0.687999
hsa-miR-185-5p	86.4811	77.0418	0	10.0715	272.807	140.642	2.57225	1.36303	0.534496	0.701313
hsa-miR-454-3p	34.0404	0.247723	0	0	97.3757	0	2.82458	1.49803	0.543023	0.707992
hsa-miR-3173-5p	0	11.643	0	0	0.386412	33.8583	2.78539	1.47788	0.541418	0.707992
hsa-miR-99b-5p	4806.14	9570.77	8357.44	13715.2	8649.82	6604.69	1.27418	0.349565	0.548178	0.712458
hsa-miR-138-5p	46.0006	227.41	2.50448	3.59695	115.923	0	-2.31095	-1.20849	0.551968	0.712887
hsa-miR-424-3p	63.4808	375.3	385.69	0	383.32	0	-2.14924	-1.10382	0.550541	0.712887
hsa-miR-93-5p	245.643	295.533	310.555	30.9338	309.516	122.99	-1.83376	-0.874804	0.554205	0.71354
hsa-miR-99b-3p	130.642	24.5246	7.51343	2.15817	0.386412	70.6106	-2.21759	-1.14899	0.56008	0.718857
hsa-miR-222-3p	198.723	514.768	438.284	5.75512	339.269	277.812	-1.84753	-0.8856	0.565342	0.723357
hsa-miR-379-5p	1945.83	8506.06	2870.13	9496.66	3379.94	5270.04	1.36168	0.445385	0.584722	0.745838
hsa-miR-30a-5p	1.84002	6.68852	0	17.2654	1.93206	0.578775	1.93916	0.95543	0.609972	0.775643
hsa-miR-484	608.128	275.963	673.704	12.2296	529.77	466.493	-1.54278	-0.625533	0.616825	0.781944
hsa-miR-24-3p	7038.09	6553.75	17766.8	26149.1	6852.24	6188.55	1.24986	0.321771	0.621295	0.785195
hsa-miR-941	175.722	387.686	916.639	491.343	292.9	221.96	-1.46604	-0.551921	0.625131	0.787627
hsa-miR-485-3p	208.843	105.034	791.415	0	459.83	150.482	-1.8082	-0.854553	0.628873	0.789926
hsa-miR-29c-5p	0.920012	9.16574	5.00896	7.1939	0.772823	1.15755	-1.8489	-0.886669	0.632704	0.790313
hsa-miR-27a-3p	4205.38	11674.7	11372.8	17542.3	6492.87	8975.36	1.21128	0.27653	0.633017	0.790313
hsa-miR-25-3p	654.129	1069.42	503.4	28.7756	2191.73	965.397	1.43023	0.516247	0.642239	0.792358
hsa-miR-3182	0	24.0291	0	0	57.5753	0	2.34765	1.23122	0.642349	0.792358
hsa-miR-12135	34.0404	11.8907	0	0.71939	0	98.6812	2.14813	1.10308	0.640202	0.792358
hsa-miR-499a-5p	0.920012	0	12.5224	21.5817	3.4777	0	2.0401	1.02864	0.640663	0.792358
hsa-let-7d-3p	1492.26	314.856	4450.46	6357.97	479.537	2043.37	1.41978	0.505671	0.653182	0.803316
hsa-miR-1296-5p	85.5611	31.9562	303.042	776.941	0	0	1.84948	0.887122	0.655706	0.804021
[truncated: 2,296 more rows]

## Sheet: Sheet3
Name	CPM	CPM	CPM	CPM	CPM	CPM	Fold change	Log fold change	P-value	FDR p-value
[truncated: 54 more rows]
