# Supplementary material for: Distinct brain and lung endothelial miRNA/mRNA profiles after exposure to Plasmodium falciparum-infected red blood cells
Source: iScience. 2024 Oct 28;27(11):111265. doi: 10.1016/j.isci.2024.111265 (PMC11576406; doi:10.1016/j.isci.2024.111265)
Supplement: Table S11. miRNA profiles of HBMEC1.5 and HBMEC1.5 + 40°C/ mRNA profiles of HBMEC1.5 and HBMEC1.5 + 40°C/ miRNA-mRNA targets within HBMEC1.5 + 40°C [file mmc12.xlsx]

## Sheet: Sheet3
Name	CPM	CPM	CPM	CPM	CPM	CPM	Fold change	Log fold change	P-value	FDR p-value
TACSTD2	11.9242	0	0	56.8683	327.505	218.304	-58.9129	-5.88051	1.43161e-08	7.83278e-05
IGFBP3	2.98106	1993.34	1206.97	5.41603	0	0	457.069	8.83627	1.48517e-08	7.83278e-05
C10orf10	17.8863	1.38043	0	16.2481	332.393	927.794	-68.7126	-6.1025	4.08185e-08	0.000107638
CRYAB	41.7348	1051.89	1747.62	8.12405	19.5525	16.7926	64.0156	6.00035	3.45315e-08	0.000107638
UCP2	8.94317	902.8	822.103	2.70802	0	4.19816	217.496	7.76484	1.0433e-07	0.000220094
HMGA2	119.242	499.715	727.849	27.0802	4.88813	8.39632	30.6848	4.93945	3.85059e-07	0.000676934
MEGF6	2.98106	0	0	70.4084	97.7627	125.945	-113.415	-6.82546	1.21561e-06	0.000993909
PDIA3P1	8.94317	630.856	602.177	8.12405	0	16.7926	47.7485	5.57738	9.79033e-07	0.000993909
CPE	0	973.202	870.539	2.70802	0	0	461.144	8.84907	1.15388e-06	0.000993909
SLC25A4	20.8674	393.422	352.143	10.8321	0	0	57.6841	5.8501	7.8246e-07	0.000993909
RP11-466P24.2	0	786.844	1108.79	0	14.6644	0	128.889	7.00999	7.57057e-07	0.000993909
HSPA1L	20.8674	288.51	754.03	2.70802	0	0	254.336	7.99059	1.22495e-06	0.000993909
HSPA1A	6045.58	2015.43	11103.6	622.844	127.091	134.341	21.5509	4.42967	1.12149e-06	0.000993909
AC007362.1	8.94317	0	1.30908	43.3283	171.085	88.1614	-35.712	-5.15834	1.5105e-06	0.00111657
FBLN5	2.98106	687.453	349.525	0	4.88813	0	207.926	7.69993	1.6937e-06	0.00111657
ACP5	2.98106	2.76086	0	35.2042	34.2169	222.503	-47.9369	-5.58307	1.6686e-06	0.00111657
NID1	11.9242	2519.28	2538.31	24.3721	73.322	41.9816	36.3183	5.18263	2.53041e-06	0.00157005
FST	56.6401	339.585	260.507	16.2481	0	4.19816	27.5963	4.7864	3.26509e-06	0.00181264
SORBS1	44.7159	248.477	273.598	10.8321	4.88813	0	31.6025	4.98197	3.17709e-06	0.00181264
EFNB2	250.409	226.39	242.18	8.12405	29.3288	16.7926	14.608	3.86869	3.502e-06	0.00184696
PHGDH	0	365.814	532.796	5.41603	9.77627	4.19816	45.1806	5.49763	3.79977e-06	0.00190857
TMEM140	17.8863	0	2.61816	92.0726	92.8745	125.945	-21.8921	-4.45234	5.26152e-06	0.00220777
HSPH1	1514.38	1365.24	4403.75	222.057	175.973	62.9724	15.7091	3.97353	5.44199e-06	0.00220777
ITGA11	5.96211	0	0	21.6641	175.973	58.7742	-51.3355	-5.68189	5.37936e-06	0.00220777
CDH11	8.94317	285.749	319.416	5.41603	4.88813	0	53.9108	5.7525	5.3696e-06	0.00220777
HPRT1	44.7159	172.554	196.362	5.41603	4.88813	4.19816	27.0155	4.75572	4.79535e-06	0.00220777
PGPEP1	2.98106	5.52171	9.16356	83.9485	107.539	109.152	-14.2119	-3.82903	6.24234e-06	0.00243867
ZNF438	5.96211	1.38043	0	54.1603	58.6576	75.5669	-31.9249	-4.99661	8.1109e-06	0.00305549
ABCC5	68.5643	1003.57	1158.54	48.7443	34.2169	29.3871	19.608	4.29337	9.64249e-06	0.00350721
MID1	2.98106	0	1.30908	70.4084	39.1051	54.5761	-41.8228	-5.38622	1.00857e-05	0.00354612
RP11-443P15.2	11.9242	0	0	105.613	102.651	33.5853	-25.5631	-4.67599	1.18361e-05	0.00402734
TNFRSF14	32.7916	0	0	170.605	171.085	424.014	-24.281	-4.60176	1.26997e-05	0.00418613
KLHDC8B	11.9242	2.76086	1.30908	32.4962	63.5457	172.125	-18.6729	-4.22287	1.33939e-05	0.00428118
GIMAP6	14.9053	1.38043	0	46.0363	107.539	125.945	-20.8297	-4.38057	1.42548e-05	0.00429598
MT-ND6	101.356	15.1847	10.4726	460.363	454.596	1225.86	-17.2845	-4.11141	1.38541e-05	0.00429598
HSPA1B	5398.69	612.91	2631.25	389.954	53.7695	88.1614	16.1174	4.01055	1.53094e-05	0.00448564
FARSB	83.4696	292.651	284.07	18.9561	0	20.9908	15.4494	3.94947	1.82123e-05	0.00519199
NPR1	2.98106	292.651	185.889	5.41603	4.88813	4.19816	31.4088	4.9731	1.99002e-05	0.00552386
HSPA6	2402.73	85.5866	179.344	70.4084	0	0	36.7512	5.19972	2.17483e-05	0.00573504
BMX	5.96211	4.14129	7.85448	43.3283	161.308	67.1706	-14.0886	-3.81645	2.13512e-05	0.00573504
WSCD1	8.94317	0	1.30908	40.6202	53.7695	83.9632	-22.9059	-4.51765	2.40597e-05	0.0061898
SLC1A1	8.94317	1.38043	0	62.2844	68.4339	37.7834	-22.8813	-4.5161	2.72291e-05	0.00683839
ECM1	62.6022	244.336	246.107	8.12405	0	25.189	16.2363	4.02115	3.10025e-05	0.00760499
ATP2B1	11.9242	795.127	1030.25	24.3721	43.9932	8.39632	23.8558	4.57627	3.17417e-05	0.00760936
GPR137B	5.96211	871.05	1002.76	24.3721	34.2169	20.9908	23.4876	4.55383	3.36326e-05	0.00771209
GPR124	0	252.618	181.962	5.41603	4.88813	0	38.4839	5.26618	3.34605e-05	0.00771209
HSPE1	160.977	369.955	709.522	48.7443	24.4407	33.5853	11.3288	3.50193	3.78066e-05	0.00813599
IER5L	175.882	85.5866	96.872	10.8321	0	12.5945	13.3388	3.73756	3.69973e-05	0.00813599
MGP	26.8295	0	0	56.8683	161.308	247.691	-18.2243	-4.18779	3.85665e-05	0.00813599
EPB41L1	8.94317	182.217	167.562	0	9.77627	0	39.0339	5.28666	3.787e-05	0.00813599
R3HDM1	11.9242	310.596	377.015	13.5401	9.77627	16.7926	17.0951	4.09551	4.01854e-05	0.00831128
CTDSPL	11.9242	1.38043	2.61816	43.3283	53.7695	100.756	-15.0155	-3.90838	4.10141e-05	0.00831955
NOP58	71.5454	368.574	353.452	27.0802	24.4407	25.189	10.2686	3.36017	4.5418e-05	0.00893243
AMPD3	5.96211	345.107	422.833	0	29.3288	4.19816	23.547	4.55747	4.57291e-05	0.00893243
ARC	801.904	0	1.30908	0	4.88813	0	152.475	7.25243	6.16852e-05	0.0118301
CTNNB1	330.897	4919.85	4140.62	235.597	361.722	197.314	11.8233	3.56357	6.9948e-05	0.0131752
AZIN1	98.3749	601.867	737.012	48.7443	48.8813	12.5945	12.9154	3.69102	7.22621e-05	0.0132054
PRUNE2	32.7916	153.228	217.307	13.5401	9.77627	8.39632	12.2653	3.61651	7.36222e-05	0.0132054
MAPKAPK5	20.8674	117.336	175.417	8.12405	4.88813	4.19816	16.9529	4.08346	7.38642e-05	0.0132054
MYH10	59.6211	698.497	630.977	29.7882	48.8813	29.3871	12.9028	3.68961	7.51537e-05	0.013212
CDC25B	38.7537	15.1847	10.4726	59.5764	224.854	289.673	-9.22601	-3.20571	8.38396e-05	0.0144577
ADAMTS1	292.144	1202.35	623.122	75.8245	78.2101	37.7834	10.9893	3.45803	8.4981e-05	0.0144577
CCDC88A	35.7727	407.226	547.196	27.0802	43.9932	12.5945	11.8472	3.56647	9.45293e-05	0.0149631
TBC1D8	26.8295	5.52171	3.92724	105.613	171.085	67.1706	-10.7034	-3.41999	9.50442e-05	0.0149631
ATP5G3	208.674	376.857	328.579	32.4962	39.1051	41.9816	8.24061	3.04275	9.36192e-05	0.0149631
HTRA3	20.8674	0	1.30908	27.0802	112.427	214.106	-17.0833	-4.09451	9.13753e-05	0.0149631
LINC00963	5.96211	0	0	27.0802	68.4339	46.1798	-31.8231	-4.992	9.03329e-05	0.0149631
HSPD1	822.772	1435.65	2368.13	213.933	117.315	109.152	10.3787	3.37555	9.70659e-05	0.0150566
GPNMB	0	0	0	78.5325	127.091	67.1706	-303.952	-8.2477	9.88958e-05	0.0151182
SRSF7	205.693	213.966	250.034	21.6641	34.2169	29.3871	8.31018	3.05488	0.000103356	0.0155742
MTUS1	11.9242	12.4239	20.9453	78.5325	239.519	88.1614	-8.45659	-3.08008	0.000105919	0.0157357
LYN	44.7159	17.9456	9.16356	113.737	239.519	180.521	-7.95058	-2.99106	0.000108879	0.0159508
SMO	2.98106	154.608	133.526	2.70802	0	4.19816	36.6281	5.19488	0.000112704	0.0160649
ACSL4	95.3938	361.672	524.941	40.6202	48.8813	8.39632	9.97634	3.31851	0.00011133	0.0160649
FABP5	32.7916	4.14129	1.30908	48.7443	131.98	251.89	-11.9869	-3.58339	0.000115332	0.0162202
ID2	387.537	6.90214	5.23632	5.41603	0	0	56.9278	5.83106	0.000128614	0.0178502
RAPH1	56.6401	368.574	475.196	37.9122	39.1051	0	11.5385	3.52839	0.000149434	0.0197028
IGF2R	65.5833	0	0	387.246	420.379	230.899	-16.0574	-4.00516	0.000147667	0.0197028
F2RL3	0	9.663	3.92724	8.12405	102.651	142.737	-16.132	-4.01186	0.00014638	0.0197028
KDM6A	35.7727	212.586	219.926	27.0802	9.77627	0	11.8062	3.56147	0.000149365	0.0197028
TOB1	196.75	113.195	119.126	21.6641	14.6644	8.39632	8.68274	3.11815	0.000152817	0.0199002
CPEB4	157.996	260.901	501.378	54.1603	34.2169	0	10.1215	3.33936	0.000160734	0.0206759
RPS10-NUDT3	17.8863	139.423	192.435	18.9561	0	0	15.9658	3.99691	0.000168074	0.0210326
PAPD5	17.8863	240.195	386.179	24.3721	19.5525	4.19816	13.0405	3.70493	0.000169489	0.0210326
SLC5A3_1	83.4696	45.5541	140.072	2.70802	14.6644	4.19816	13.5379	3.75893	0.000167724	0.0210326
PLA2G4A	77.5075	350.629	411.051	37.9122	43.9932	12.5945	8.83861	3.14382	0.000176939	0.0217018
SEMA3A	5.96211	168.412	108.654	2.70802	0	0	67.5996	6.07894	0.000191122	0.0231719
ZNF703	160.977	80.0649	124.363	16.2481	14.6644	12.5945	7.97339	2.99519	0.000202128	0.0242278
NCOA2	5.96211	109.054	147.926	8.12405	0	0	25.495	4.67214	0.000208878	0.0247555
RP11-693N9.2	11.9242	0	0	16.2481	87.9864	79.7651	-17.9059	-4.16236	0.00022583	0.0264673
ARID2	5.96211	169.793	195.053	5.41603	19.5525	0	15.0309	3.90986	0.000245339	0.0284377
SEMA6D	0	132.521	136.144	5.41603	0	0	38.1143	5.25226	0.000248272	0.028465
GIMAP1	14.9053	1.38043	0	43.3283	43.9932	88.1614	-13.6147	-3.7671	0.000255764	0.0290086
MYZAP	0	0	0	35.2042	87.9864	79.7651	-225.019	-7.8139	0.000263615	0.029581
INTS2	56.6401	113.195	151.853	16.2481	14.6644	8.39632	8.02549	3.00459	0.00027537	0.0305747
P4HA1	74.5264	556.313	759.267	48.7443	68.4339	16.7926	10.3706	3.37442	0.000280543	0.0308246
C14orf159	17.8863	2.76086	5.23632	51.4523	68.4339	71.3687	-8.99714	-3.16947	0.000311469	0.0338698
TXNIP	59.6211	154.608	185.889	8.12405	4.88813	33.5853	8.70235	3.12141	0.000315893	0.0340004
PREX2	35.7727	443.118	222.544	8.12405	53.7695	4.19816	10.8558	3.44039	0.000344012	0.0352295
BMF	14.9053	1.38043	1.30908	24.3721	87.9864	75.5669	-12.4901	-3.64272	0.000331189	0.0352295
DNAJA2	65.5833	684.693	727.849	62.2844	39.1051	41.9816	10.2012	3.35066	0.00033663	0.0352295
TOP2A	23.8485	107.673	56.2905	2.70802	4.88813	0	23.4145	4.54933	0.000337566	0.0352295
UBQLN2	17.8863	182.217	202.907	27.0802	0	0	13.4687	3.75154	0.00034365	0.0352295
PLA2G4C	23.8485	0	1.30908	40.6202	102.651	146.936	-12.4885	-3.64253	0.00035111	0.0352715
ARVCF	17.8863	2.76086	0	43.3283	48.8813	109.152	-11.2442	-3.49112	0.000350071	0.0352715
MTF2	11.9242	139.423	140.072	8.12405	9.77627	8.39632	10.9793	3.45671	0.000374664	0.0372826
TNFSF18	5.96211	0	0	37.9122	39.1051	29.3871	-25.8935	-4.69452	0.000379186	0.03738
TNS1	68.5643	632.236	490.905	48.7443	53.7695	33.5853	8.73797	3.1273	0.000423119	0.0409455
JAM2	5.96211	143.565	94.2538	0	9.77627	4.19816	18.446	4.20524	0.000420454	0.0409455
SLC6A9	0	89.7279	168.871	5.41603	4.88813	0	22.9375	4.51963	0.000435324	0.0409982
ROCK2	47.6969	1129.19	1295.99	73.1164	112.427	29.3871	11.5001	3.52357	0.000430444	0.0409982
ADAMTS18	0	0	0	51.4523	83.0983	37.7834	-191.531	-7.58143	0.000434429	0.0409982
C2CD2	8.94317	8.28257	7.85448	70.4084	83.0983	50.3779	-7.98302	-2.99693	0.000445212	0.0415584
BCL9	23.8485	82.8257	130.908	10.8321	4.88813	0	13.2659	3.72965	0.000471155	0.0434326
HSPA4L	17.8863	122.858	243.489	8.12405	19.5525	12.5945	9.72804	3.28215	0.000473526	0.0434326
CHD1	38.7537	229.151	291.925	27.0802	24.4407	4.19816	9.82745	3.29682	0.000489239	0.0441068
MAOA	0	99.3909	163.635	2.70802	9.77627	0	20.814	4.37948	0.000488809	0.0441068
MAP4K3	11.9242	276.086	269.671	18.9561	24.4407	4.19816	11.5916	3.53501	0.000497702	0.0441156
BAIAP2-AS1	8.94317	0	0	27.0802	53.7695	37.7834	-19.2146	-4.26413	0.000496606	0.0441156
NLK	35.7727	136.662	176.726	21.6641	14.6644	0	9.09718	3.18542	0.000502153	0.0441392
ESD	77.5075	1126.43	1292.06	75.8245	53.7695	117.548	10.0735	3.33249	0.000525217	0.0450406
NEO1	0	1274.14	1022.39	0	0	0	2863.75	11.4837	0.000524611	0.0450406
APLN	125.204	16.5651	2.61816	170.605	596.352	898.406	-11.6726	-3.54506	0.00052104	0.0450406
GBP2	23.8485	0	0	54.1603	43.9932	197.314	-13.0777	-3.70903	0.000548435	0.0450804
N4BP3	5.96211	117.336	74.6176	0	4.88813	0	41.8581	5.38744	0.000535049	0.0450804
TUBB2A	295.125	212.586	163.635	13.5401	53.7695	37.7834	6.78293	2.76191	0.000551325	0.0450804
PSMB8	8.94317	1.38043	0	35.2042	14.6644	88.1614	-15.9557	-3.996	0.000545853	0.0450804
KCTD12	140.11	5.52171	10.4726	487.443	1178.04	209.908	-12.1578	-3.60381	0.000535954	0.0450804
HOXB8	5.96211	202.923	128.29	2.70802	9.77627	16.7926	11.6776	3.54567	0.000545183	0.0450804
RP11-295K3.1	0	138.043	145.308	0	14.6644	0	19.637	4.2955	0.000560444	0.0454736
AOX1	41.7348	161.51	124.363	21.6641	4.88813	12.5945	7.77296	2.95846	0.00059036	0.0456039
FAM124B	14.9053	0	0	24.3721	112.427	46.1798	-13.7848	-3.78501	0.00057913	0.0456039
PAICS	101.356	117.336	149.235	18.9561	19.5525	20.9908	6.33643	2.66367	0.000592314	0.0456039
PALLD	32.7916	229.151	163.635	21.6641	9.77627	20.9908	7.90224	2.98226	0.000589593	0.0456039
GIMAP8	8.94317	2.76086	1.30908	21.6641	73.322	50.3779	-12.431	-3.63587	0.000569	0.0456039
ARHGEF17	47.6969	2.76086	1.30908	113.737	151.532	163.728	-8.71239	-3.12307	0.00058544	0.0456039
UHRF1BP1L	17.8863	205.684	251.343	24.3721	19.5525	0	10.4941	3.39151	0.000572113	0.0456039
EEF1A1P5	83.4696	2346.73	2501.65	70.4084	127.091	264.484	10.683	3.41724	0.000617539	0.0470854
SNPH	11.9242	0	0	35.2042	39.1051	50.3779	-16.4505	-4.04006	0.000620485	0.0470854
VWF	68.5643	53.8367	45.8178	170.605	567.023	302.268	-6.18322	-2.62836	0.000626374	0.0471928
DPP4	8.94317	0	0	24.3721	53.7695	37.7834	-18.6149	-4.21839	0.000676253	0.0478733
ARL10	5.96211	4.14129	0	29.7882	68.4339	29.3871	-13.2798	-3.73116	0.000656181	0.0478733
KIAA0020	41.7348	115.956	171.49	2.70802	24.4407	16.7926	8.06397	3.01149	0.000669587	0.0478733
CNTNAP3B	11.9242	0	0	46.0363	48.8813	25.189	-16.4414	-4.03926	0.000666641	0.0478733
ASS1	5.96211	92.4887	103.417	2.70802	0	8.39632	17.1156	4.09724	0.000673838	0.0478733
BEND7	5.96211	0	0	32.4962	39.1051	25.189	-23.2379	-4.53841	0.00064994	0.0478733
MZF1	2.98106	2.76086	1.30908	37.9122	34.2169	29.3871	-13.9764	-3.80492	0.000664201	0.0478733
MYL9	101.356	142.184	175.417	13.5401	14.6644	41.9816	6.28359	2.65159	0.000655587	0.0478733
PGK1	471.007	2319.12	2839.4	319.546	195.525	180.521	8.06471	3.01162	0.000670541	0.0478733
MYLK	11.9242	294.031	239.562	21.6641	24.4407	4.19816	10.695	3.41887	0.000689844	0.0479559
TSC22D2	71.5454	155.988	286.689	35.2042	19.5525	8.39632	7.7891	2.96146	0.00069106	0.0479559
ARHGEF5	0	114.576	100.799	2.70802	0	0	52.8669	5.72429	0.000685482	0.0479559
ALKBH7	0	1.38043	0	24.3721	0	88.1614	-46.2053	-5.52999	0.000705369	0.0486289
EPB41L4A-AS1	5.96211	0	0	16.2481	29.3288	58.7742	-23.0193	-4.52477	0.000723716	0.0489344
GIMAP7	2.98106	1.38043	0	24.3721	29.3288	41.9816	-22.3638	-4.48309	0.000721481	0.0489344
TP53I11	32.7916	0	0	48.7443	146.644	184.719	-12.0146	-3.58672	0.000723	0.0489344
ABCA1	0	353.39	176.726	2.70802	29.3288	0	16.6379	4.0564	0.000757278	0.0502375
DNAJA4	792.961	131.141	412.36	89.3645	53.7695	16.7926	8.18735	3.0334	0.000753238	0.0502375
IQSEC2	11.9242	110.434	112.581	13.5401	0	0	14.3488	3.84286	0.000755207	0.0502375
NOS3	131.167	2172.79	1891.62	127.277	141.756	197.314	8.99675	3.1694	0.00077078	0.0508137
ERCC5	5.96211	1.38043	6.5454	56.8683	34.2169	41.9816	-10.0509	-3.32926	0.000784123	0.0513722
CTD-2562J17.7	2.98106	1.38043	0	5.41603	9.77627	109.152	-27.1542	-4.7631	0.000798177	0.0519702
TULP4	0	746.812	624.431	48.7443	39.1051	12.5945	13.5183	3.75685	0.000808155	0.0522971
PMCH	14.9053	0	0	13.5401	73.322	96.5577	-13.5596	-3.76125	0.000814749	0.0524022
SEPT8	80.4885	364.433	390.106	51.4523	48.8813	25.189	6.61351	2.72542	0.000821793	0.052535
FAM212B	26.8295	9.663	3.92724	83.9485	83.0983	75.5669	-7.60276	-2.92652	0.000830066	0.0527442
DDB2	41.7348	1.38043	1.30908	67.7004	83.0983	256.088	-9.55219	-3.25583	0.000853327	0.0538976
CNOT6	23.8485	180.836	157.09	18.9561	14.6644	12.5945	7.67902	2.94092	0.000866293	0.054069
LMBRD1	8.94317	167.032	222.544	16.2481	9.77627	16.7926	9.115	3.18824	0.000862837	0.054069
RLF	20.8674	150.467	244.798	18.9561	29.3288	4.19816	7.93173	2.98764	0.000897944	0.055389
SLC16A6	0	2.76086	2.61816	32.4962	43.9932	25.189	-13.4888	-3.75369	0.000893213	0.055389
GATS_1	2.98106	0	0	24.3721	29.3288	20.9908	-29.6155	-4.88828	0.000916556	0.0557328
ARID5B	17.8863	67.641	98.181	8.12405	4.88813	0	12.5284	3.64713	0.000923968	0.0557328
FAM174B	47.6969	0	0	157.065	136.868	197.314	-10.5541	-3.39973	0.000917378	0.0557328
ARMCX2	68.5643	129.76	159.708	24.3721	9.77627	20.9908	6.23165	2.63961	0.000924653	0.0557328
ZBED5	8.94317	1.38043	0	32.4962	48.8813	29.3871	-14.4726	-3.85525	0.000933804	0.0559646
FAM213A	110.299	2.76086	1.30908	281.634	395.939	516.374	-10.5843	-3.40386	0.000945288	0.0562001
EPOR	2.98106	1.38043	1.30908	37.9122	19.5525	29.3871	-16.0204	-4.00184	0.00094839	0.0562001
TMEM37	2.98106	0	0	32.4962	9.77627	29.3871	-31.0623	-4.95709	0.000959239	0.0565254
NAA15	26.8295	285.749	320.725	18.9561	48.8813	4.19816	8.88454	3.1513	0.000974677	0.0571161
PPP3CA	11.9242	336.825	295.852	37.9122	24.4407	8.39632	8.92654	3.1581	0.00099368	0.0572353
EME2	14.9053	0	0	37.9122	48.8813	46.1798	-14.2869	-3.83662	0.000989853	0.0572353
PLCB4	2.98106	93.8691	83.7812	2.70802	0	0	43.3518	5.43802	0.000984986	0.0572353
SMC1A	50.678	407.226	323.343	29.7882	63.5457	20.9908	6.91733	2.79022	0.000998416	0.0572353
LUCAT1	2.98106	0	0	32.4962	48.8813	8.39632	-34.5246	-5.10955	0.00102311	0.0583339
FKBP5	47.6969	78.6844	89.0175	16.2481	4.88813	0	8.56358	3.09821	0.00105267	0.0593884
KIAA1671	44.7159	6.90214	3.92724	148.941	146.644	67.1706	-7.00558	-2.8085	0.00105287	0.0593884
CLK4	11.9242	92.4887	81.163	2.70802	4.88813	8.39632	11.8152	3.56257	0.00106547	0.0597799
AKR1A1	41.7348	568.737	679.413	62.2844	19.5525	67.1706	8.5657	3.09857	0.0010773	0.0600025
TUBGCP4	5.96211	201.543	234.325	16.2481	24.4407	8.39632	8.97321	3.16562	0.00108082	0.0600025
CACHD1	47.6969	66.2606	75.9267	13.5401	0	0	10.4475	3.38509	0.00110183	0.0602019
SEMA4C	0	164.271	96.872	0	4.88813	12.5945	14.9052	3.89774	0.00110241	0.0602019
GVINP1	0	126.999	164.944	8.12405	14.6644	0	12.58	3.65306	0.00110724	0.0602019
CABLES1	23.8485	11.0434	6.5454	46.0363	102.651	113.35	-6.78749	-2.76288	0.00109196	0.0602019
SLC20A1	357.727	724.725	1722.75	105.613	136.868	142.737	7.30692	2.86926	0.00115667	0.0620784
DARS	35.7727	213.966	155.781	21.6641	29.3288	12.5945	6.41808	2.68214	0.00116531	0.0620784
ZNF148	23.8485	258.14	218.616	10.8321	43.9932	4.19816	8.6789	3.11751	0.00117118	0.0620784
ZNF618	8.94317	0	0	29.7882	53.7695	20.9908	-17.0183	-4.08901	0.00115937	0.0620784
TSPAN11	0	0	0	18.9561	58.6576	50.3779	-140.629	-7.13575	0.00116065	0.0620784
NBEA	2.98106	189.119	153.162	5.41603	24.4407	4.19816	10.3238	3.3679	0.00118766	0.0626373
NMNAT2	0	82.8257	98.181	2.70802	4.88813	0	22.1852	4.47153	0.00121428	0.0634973
CTSV	2.98106	82.8257	71.9994	0	0	4.19816	34.3154	5.10078	0.0012188	0.0634973
TUBB3_1	71.5454	41.4129	30.1089	2.70802	0	0	30.7028	4.9403	0.00122203	0.0634973
ZFP36L2	125.204	430.694	464.724	54.1603	68.4339	41.9816	6.24061	2.64169	0.00123639	0.0639287
STRN3	2.98106	200.162	257.889	18.9561	24.4407	4.19816	9.58366	3.26058	0.00125545	0.0645973
C8orf82	11.9242	1.38043	1.30908	43.3283	19.5525	50.3779	-11.0638	-3.46778	0.00126536	0.0647911
NFIX	23.8485	71.7823	49.7451	2.70802	4.88813	4.19816	12.6891	3.66551	0.00128557	0.0655082
ASRGL1	2.98106	0	0	18.9561	29.3288	25.189	-28.1579	-4.81547	0.00130668	0.0659467
CTSF	8.94317	0	0	16.2481	34.2169	58.7742	-16.142	-4.01274	0.00130447	0.0659467
HOXD-AS1	2.98106	1.38043	0	29.7882	9.77627	33.5853	-18.8026	-4.23286	0.00131426	0.0660065
CUL3	53.659	752.334	898.029	64.9924	92.8745	33.5853	8.90186	3.15411	0.0013329	0.0660065
EIF4E	41.7348	121.478	137.453	18.9561	14.6644	12.5945	6.39413	2.67675	0.00132899	0.0660065
PIEZO2	8.94317	1.38043	0	46.0363	48.8813	12.5945	-13.3806	-3.74207	0.00132943	0.0660065
IFRD1	104.337	452.781	1057.74	56.8683	107.539	20.9908	8.74164	3.1279	0.00134312	0.0662019
KDM6B	83.4696	129.76	218.616	29.7882	19.5525	25.189	5.69136	2.50877	0.00135898	0.0666722
ZNF462	0	86.967	103.417	5.41603	0	4.19816	17.3926	4.1204	0.00136659	0.0667048
C1QTNF5	44.7159	1.38043	1.30908	51.4523	92.8745	268.682	-9.02431	-3.17382	0.00137229	0.0667048
NECAB3	2.98106	0	0	27.0802	14.6644	25.189	-28.1409	-4.8146	0.00140132	0.0678034
SELE	429.272	1.38043	1.30908	5.41603	9.77627	8.39632	17.8554	4.15829	0.00145736	0.0688835
PAX8-AS1	2.98106	0	0	13.5401	29.3288	33.5853	-28.2314	-4.81923	0.00147196	0.0688835
HNRNPA3	259.352	1390.09	1428.21	181.437	146.644	92.3595	7.29479	2.86687	0.00145304	0.0688835
GCNT2	14.9053	1.38043	1.30908	73.1164	39.1051	25.189	-9.78297	-3.29027	0.00143504	0.0688835
GMPR	17.8863	6.90214	0	35.2042	53.7695	92.3595	-8.07983	-3.01433	0.00147589	0.0688835
ARHGEF40	8.94317	75.9236	75.9267	0	9.77627	4.19816	12.6609	3.6623	0.00144265	0.0688835
NEDD4	50.678	632.236	608.722	48.7443	92.8745	20.9908	7.97309	2.99514	0.00146711	0.0688835
KIAA0355	65.5833	393.422	371.779	56.8683	48.8813	29.3871	6.10597	2.61022	0.00145093	0.0688835
FBXL14	11.9242	69.0214	68.0722	8.12405	0	0	13.8694	3.79383	0.00148263	0.0688933
KB-1639H6.7	0	575.639	505.305	0	0	0	1349.04	10.3977	0.00153079	0.07051
SRP54	80.4885	434.835	492.214	56.8683	68.4339	29.3871	6.51715	2.70424	0.00153057	0.07051
PLA2G6	5.96211	81.4453	94.2538	5.41603	4.88813	4.19816	11.9831	3.58292	0.00154472	0.0708422
TRANK1	8.94317	0	0	24.3721	34.2169	37.7834	-16.028	-4.00253	0.00160991	0.0727396
MGST2	17.8863	6.90214	5.23632	35.2042	43.9932	117.548	-7.04311	-2.81621	0.00161246	0.0727396
RFNG	26.8295	1.38043	2.61816	51.4523	83.0983	88.1614	-8.15486	-3.02766	0.00159858	0.0727396
SEMA6B	20.8674	20.7064	9.16356	86.6565	68.4339	130.143	-5.83273	-2.54417	0.00162057	0.0727396
SNAI1	471.007	4.14129	6.5454	8.12405	9.77627	16.7926	13.6097	3.76657	0.00161707	0.0727396
TVP23C-CDRT4	0	0	0	27.0802	43.9932	37.7834	-118.969	-6.89445	0.00163592	0.0731171
CAD	59.6211	323.02	303.707	46.0363	43.9932	25.189	5.93002	2.56804	0.00169629	0.0733174
NUDT16	8.94317	1.38043	0	27.0802	39.1051	33.5853	-12.9872	-3.69902	0.00168663	0.0733174
ANKRD17	68.5643	875.192	1053.81	119.153	92.8745	4.19816	9.18211	3.19883	0.00171686	0.0733174
GPX3	62.6022	0	1.30908	100.197	151.532	335.853	-9.36706	-3.2276	0.00164793	0.0733174
MOCS1	5.96211	80.0649	79.8539	0	4.88813	8.39632	13.0883	3.7102	0.00171316	0.0733174
CHUK	29.8106	259.521	267.052	18.9561	43.9932	12.5945	7.48058	2.90315	0.00171223	0.0733174
PIP4K2C	11.9242	162.891	150.544	13.5401	14.6644	16.7926	7.2199	2.85198	0.00169211	0.0733174
E2F7	41.7348	5.52171	0	232.889	141.756	20.9908	-8.61857	-3.10745	0.00170728	0.0733174
ZNF268	2.98106	0	0	10.8321	39.1051	25.189	-27.5288	-4.78287	0.00169542	0.0733174
NUDT14	17.8863	1.38043	3.92724	16.2481	24.4407	176.323	-9.81799	-3.29543	0.00168873	0.0733174
ADORA2A	5.96211	0	0	10.8321	29.3288	54.5761	-20.2241	-4.338	0.00165453	0.0733174
PPP1CB	47.6969	1024.28	947.774	75.8245	136.868	25.189	8.49946	3.08737	0.0017632	0.0749931
NPC2	125.204	24.8477	41.8906	246.429	263.959	633.922	-6.08792	-2.60595	0.00177108	0.0750256
PRPF40B	5.96211	96.63	102.108	2.70802	4.88813	12.5945	10.246	3.35699	0.00179517	0.0757418
VAV3	2.98106	73.1627	77.2358	0	9.77627	0	16.8272	4.07272	0.00187189	0.0760679
PBXIP1	59.6211	11.0434	6.5454	81.2405	166.197	197.314	-6.04098	-2.59478	0.00189281	0.0760679
F11R	44.7159	35.8911	24.8725	94.7806	244.407	180.521	-4.94879	-2.30707	0.00186417	0.0760679
RAPGEF4	0	75.9236	77.2358	5.41603	0	0	21.6017	4.43307	0.00190386	0.0760679
PTPRN	0	336.825	586.468	0	0	0	1152.6	10.1707	0.00187966	0.0760679
DNER	2.98106	0	0	24.3721	29.3288	12.5945	-26.6824	-4.73782	0.00187197	0.0760679
VCPIP1	29.8106	241.575	327.27	43.3283	29.3288	4.19816	7.62302	2.93036	0.0018839	0.0760679
ARFGEF1	41.7348	534.226	594.323	43.3283	92.8745	25.189	7.29106	2.86613	0.00189725	0.0760679
HNRNPF	157.996	857.246	938.611	100.197	92.8745	100.756	6.64549	2.73237	0.00186649	0.0760679
COL13A1	202.712	784.083	878.393	116.445	9.77627	117.548	7.56689	2.9197	0.00188456	0.0760679
NR4A1	116.261	107.673	86.3993	10.8321	39.1051	0	6.69779	2.74368	0.00185728	0.0760679
UBAC2	11.9242	13.8043	7.85448	46.0363	63.5457	100.756	-6.05209	-2.59743	0.00181998	0.0760679
LINC00338	8.94317	0	2.61816	24.3721	19.5525	67.1706	-11.264	-3.49365	0.00190123	0.0760679
CYB5A	26.8295	160.13	170.18	18.9561	4.88813	29.3871	6.57302	2.71656	0.00187745	0.0760679
RARS	47.6969	334.064	544.578	46.0363	53.7695	50.3779	6.17954	2.6275	0.00191513	0.0762293
TET3	20.8674	150.467	153.162	24.3721	14.6644	8.39632	6.61193	2.72507	0.00192516	0.0762803
EXD3	5.96211	0	0	8.12405	24.4407	58.7742	-18.7875	-4.2317	0.00193425	0.0762803
PDDC1	56.6401	4.14129	2.61816	143.525	112.427	155.332	-6.81075	-2.76781	0.0019381	0.0762803
TNKS2	53.659	571.497	918.975	78.5325	87.9864	8.39632	8.79248	3.13627	0.00195589	0.0766943
MT1E	447.159	0	0	10.8321	0	8.39632	21.9159	4.45391	0.00197562	0.0769053
SLC5A3_2	56.6401	38.652	147.926	5.41603	24.4407	0	8.611	3.10618	0.00197586	0.0769053
DAPK1	35.7727	1.38043	3.92724	92.0726	175.973	41.9816	-7.99878	-2.99978	0.00199301	0.0772878
IFT172	29.8106	178.075	166.253	24.3721	14.6644	20.9908	6.1242	2.61452	0.0020112	0.077549
VWCE	11.9242	0	0	18.9561	39.1051	62.9724	-12.5964	-3.65494	0.0020241	0.077549
EDNRB	2.98106	817.214	959.556	51.4523	78.2101	41.9816	10.352	3.37184	0.00201797	0.077549
CORO6	5.96211	0	0	8.12405	24.4407	54.5761	-18.0772	-4.1761	0.00202924	0.077549
MT-CO1	1574	1332.11	1163.77	8370.48	8114.3	5701.1	-5.46735	-2.45084	0.00203651	0.077549
PKN2	41.7348	194.64	196.362	29.7882	34.2169	0	6.68838	2.74166	0.00204902	0.0775885
SEC61A2	8.94317	53.8367	58.9086	2.70802	4.88813	0	15.3381	3.93905	0.00205226	0.0775885
ERGIC2	38.7537	149.086	115.199	13.5401	14.6644	25.189	5.79251	2.53419	0.00207576	0.0781967
SPATA6	0	75.9236	103.417	2.70802	0	8.39632	15.156	3.92181	0.00213368	0.0786777
RGS2	220.598	89.7279	14.3999	10.8321	24.4407	8.39632	7.42306	2.89201	0.00221533	0.0786777
PRDM5	2.98106	63.4997	69.3813	2.70802	0	0	32.5713	5.02553	0.00221433	0.0786777
RNF130	14.9053	255.379	276.216	21.6641	29.3288	20.9908	7.60108	2.9262	0.00216463	0.0786777
SOX4	107.318	244.336	384.87	43.3283	63.5457	33.5853	5.31647	2.41047	0.00211195	0.0786777
C7orf49	17.8863	0	0	40.6202	63.5457	54.5761	-10.2047	-3.35116	0.00218435	0.0786777
UNC13B	53.659	5.52171	3.92724	86.6565	166.197	138.539	-6.537	-2.70863	0.00219581	0.0786777
CBWD5	5.96211	0	3.92724	27.0802	43.9932	29.3871	-10.6437	-3.41192	0.0022113	0.0786777
FAM102A	32.7916	2.76086	1.30908	121.861	58.6576	75.5669	-7.60379	-2.92672	0.00214729	0.0786777
TMEM5	14.9053	77.304	79.8539	5.41603	4.88813	8.39632	9.13934	3.19209	0.00212103	0.0786777
FLRT2	38.7537	44.1737	20.9453	208.517	259.071	83.9632	-5.32911	-2.4139	0.00212348	0.0786777
ARIH1	62.6022	400.324	595.632	64.9924	68.4339	29.3871	6.48453	2.697	0.00210242	0.0786777
PER1	122.223	57.978	81.163	16.2481	0	16.7926	6.87246	2.78083	0.00214549	0.0786777
PPIAP22	0	77.304	69.3813	0	0	4.19816	31.3876	4.97212	0.00217728	0.0786777
XXbac-B461K10.4	8.94317	0	0	8.12405	58.6576	46.1798	-15.054	-3.91208	0.00217943	0.0786777
FOXRED2	11.9242	0	0	37.9122	43.9932	20.9908	-13.9683	-3.80409	0.0021592	0.0786777
PRPS2	8.94317	56.5976	54.9814	5.41603	0	0	16.0136	4.00123	0.00221205	0.0786777
PILRB	35.7727	0	0	78.5325	146.644	100.756	-9.45351	-3.24085	0.00226681	0.0802358
FES	26.8295	211.206	141.381	24.3721	19.5525	16.7926	6.17397	2.6262	0.00230167	0.0811973
B3GALT6	14.9053	1.38043	1.30908	24.3721	19.5525	109.152	-9.70788	-3.27916	0.00231656	0.0812371
CPEB2	26.8295	104.913	158.399	24.3721	14.6644	0	7.05579	2.81881	0.0023182	0.0812371
UTP20	23.8485	168.412	196.362	21.6641	29.3288	12.5945	6.14021	2.61829	0.00233532	0.0815661
UBB	1699.2	2573.12	5782.21	593.056	347.057	806.047	5.75328	2.52439	0.00235926	0.0821302
HTR1D	2.98106	0	0	5.41603	24.4407	41.9816	-26.2472	-4.71409	0.00238442	0.0824164
ZFYVE28	2.98106	0	0	27.0802	19.5525	12.5945	-25.21	-4.65593	0.00240067	0.0824164
MDN1	20.8674	223.629	243.489	40.6202	14.6644	12.5945	6.94656	2.7963	0.00239894	0.0824164
KIAA1462	59.6211	20.7064	18.3271	73.1164	303.064	121.747	-5.1678	-2.36955	0.00240655	0.0824164
DISP2	0	81.4453	61.5268	0	0	4.19816	30.6051	4.9357	0.00238726	0.0824164
TREX1	5.96211	0	1.30908	21.6641	14.6644	46.1798	-13.9719	-3.80446	0.00243275	0.0827161
SEMA3G	8.94317	4.14129	2.61816	5.41603	102.651	46.1798	-9.85616	-3.30103	0.00243882	0.0827161
SLC30A4	5.96211	103.532	153.162	16.2481	9.77627	4.19816	8.31554	3.05581	0.00243314	0.0827161
RNASE1	77.5075	0	0	78.5325	185.749	570.95	-10.8612	-3.44111	0.00246527	0.083345
SEMA6A	2.98106	44.1737	77.2358	2.70802	0	0	29.8776	4.90099	0.00253553	0.0834607
RP11-423H2.1	5.96211	4.14129	0	29.7882	19.5525	46.1798	-10.6391	-3.4113	0.00254817	0.0834607
KIAA0196	65.5833	324.401	438.542	48.7443	73.322	25.189	5.65876	2.50049	0.00250901	0.0834607
C9orf41	14.9053	91.1083	120.435	5.41603	19.5525	4.19816	8.14374	3.02569	0.00250726	0.0834607
LIPA	11.9242	146.325	132.217	10.8321	14.6644	16.7926	6.92372	2.79155	0.00249357	0.0834607
SPRED1	8.94317	115.956	107.345	13.5401	4.88813	8.39632	8.18946	3.03377	0.00253423	0.0834607
TEN1	2.98106	0	0	18.9561	4.88813	41.9816	-25.5629	-4.67598	0.00250719	0.0834607
HSD17B14	17.8863	0	0	32.4962	24.4407	109.152	-10.1305	-3.34064	0.00255573	0.0834607
ZNF581	14.9053	0	0	35.2042	9.77627	117.548	-11.8245	-3.56371	0.00255375	0.0834607
CCDC106	5.96211	0	1.30908	16.2481	19.5525	54.5761	-14.6266	-3.87052	0.00252388	0.0834607
THOC2	32.7916	434.835	315.488	43.3283	68.4339	8.39632	6.52479	2.70593	0.00255294	0.0834607
TPP2	38.7537	502.476	678.104	92.0726	53.7695	16.7926	7.41429	2.89031	0.00257013	0.0836721
KIF21B	2.98106	0	0	29.7882	9.77627	16.7926	-25.2039	-4.65558	0.00258855	0.0837547
ZC3H7A	41.7348	320.259	352.143	40.6202	43.9932	41.9816	5.65188	2.49873	0.00258404	0.0837547
TNRC6C	5.96211	139.423	154.472	16.2481	19.5525	0	8.23078	3.04103	0.00260154	0.0839177
AGO2	38.7537	194.64	248.725	48.7443	14.6644	0	7.27683	2.86331	0.00261807	0.0841934
PARP4	53.659	12.4239	15.709	162.481	166.197	71.3687	-5.22327	-2.38495	0.00263069	0.0843419
CYP1A1	5.96211	0	0	2.70802	68.4339	33.5853	-19.7868	-4.30647	0.00265623	0.0849027
HSPE1-MOB4	11.9242	92.4887	104.726	5.41603	19.5525	0	8.70035	3.12107	0.00270212	0.0850804
FBXL17	8.94317	85.5866	79.8539	10.8321	0	4.19816	10.0421	3.32799	0.00270187	0.0850804
ISG20	2.98106	0	1.30908	16.2481	9.77627	41.9816	-16.1438	-4.01291	0.00268417	0.0850804
MBD3	53.659	16.5651	18.3271	116.445	48.8813	314.862	-5.57332	-2.47854	0.00270137	0.0850804
ZNF587	8.94317	0	0	83.9485	43.9932	0	-15.3222	-3.93756	0.0026889	0.0850804
RGPD2	0	59.3584	78.5448	2.70802	0	0	33.7719	5.07775	0.00271784	0.0851744
PURB	26.8295	296.792	377.015	46.0363	48.8813	16.7926	6.24507	2.64272	0.00272933	0.0851744
XRRA1	11.9242	0	0	29.7882	9.77627	92.3595	-12.4895	-3.64264	0.00272757	0.0851744
WDR36	11.9242	171.173	163.635	32.4962	9.77627	4.19816	7.09098	2.82599	0.00276644	0.0860778
GGT5	5.96211	0	0	24.3721	4.88813	58.7742	-18.2002	-4.18588	0.00280685	0.0870785
AC093616.4	2.98106	0	0	18.9561	14.6644	25.189	-23.7547	-4.57014	0.00283173	0.0875925
DPP8	35.7727	220.869	188.508	24.3721	43.9932	8.39632	5.87135	2.55369	0.00284912	0.0876218
RPP25	20.8674	0	0	24.3721	73.322	88.1614	-9.60604	-3.26394	0.00284929	0.0876218
PLEKHO1	68.5643	22.0869	15.709	138.109	83.0983	352.645	-5.56465	-2.47629	0.00288361	0.0884195
TNFAIP3	125.204	2.76086	17.018	2.70802	0	0	34.6347	5.11415	0.00289674	0.0885648
REPS1	17.8863	251.238	396.651	56.8683	24.4407	0	8.0042	3.00076	0.0029052	0.0885666
RPL13P12	0	69.0214	70.6903	2.70802	0	4.19816	17.7452	4.14936	0.00294584	0.0890335
BAIAP2	92.4128	71.7823	64.1449	18.9561	4.88813	4.19816	6.41556	2.68158	0.00293462	0.0890335
MFNG	65.5833	28.989	14.3999	116.445	141.756	251.89	-4.88737	-2.28906	0.00293744	0.0890335
MLLT3	2.98106	142.184	66.7631	8.12405	9.77627	4.19816	9.38553	3.23044	0.00297297	0.0890625
KLF9	20.8674	118.717	159.708	21.6641	14.6644	12.5945	5.98501	2.58135	0.00296455	0.0890625
RP11-982M15.2	5.96211	0	0	18.9561	14.6644	33.5853	-16.1485	-4.01333	0.00298057	0.0890625
CYB561	44.7159	6.90214	6.5454	100.197	92.8745	117.548	-5.87544	-2.5547	0.00296509	0.0890625
RFX7	23.8485	99.3909	115.199	18.9561	9.77627	4.19816	6.79786	2.76508	0.00300354	0.0894952
CCT2	223.579	789.605	911.12	111.029	87.9864	130.143	5.8403	2.54604	0.00303611	0.0899576
GABPB1	35.7727	66.2606	94.2538	16.2481	9.77627	0	6.86795	2.77988	0.00302932	0.0899576
PCF11	265.314	180.836	276.216	73.1164	48.8813	16.7926	4.93182	2.30212	0.00305089	0.0901422
RAB3D	5.96211	2.76086	0	16.2481	73.322	12.5945	-12.2669	-3.61669	0.00307276	0.0905348
MSX1	83.4696	22.0869	15.709	2.70802	0	0	27.23	4.76713	0.00308834	0.0907403
MECOM	14.9053	189.119	134.835	27.0802	19.5525	4.19816	6.49122	2.69849	0.00310826	0.091072
MMRN1	217.617	1.38043	1.30908	547.019	1613.08	340.051	-11.391	-3.50982	0.00312983	0.0911857
SERPINB1	32.7916	5.52171	2.61816	46.0363	78.2101	104.954	-6.1379	-2.61775	0.00313379	0.0911857
CLSTN3	8.94317	0	0	35.2042	19.5525	20.9908	-14.1078	-3.81842	0.00313807	0.0911857
PLK3	89.4317	280.227	502.687	46.0363	39.1051	79.7651	5.30283	2.40676	0.00325327	0.0913197
LBH	301.087	19.326	14.3999	10.8321	19.5525	8.39632	8.50713	3.08867	0.00324556	0.0913197
PELI1	47.6969	115.956	132.217	13.5401	29.3288	16.7926	5.2639	2.39613	0.00321715	0.0913197
ZNF589	8.94317	0	0	29.7882	14.6644	33.5853	-14.1117	-3.81882	0.00325553	0.0913197
DTX3L	11.9242	0	2.61816	32.4962	58.6576	20.9908	-9.58799	-3.26123	0.00320974	0.0913197
RAPGEF5	11.9242	209.825	132.217	18.9561	19.5525	16.7926	6.37369	2.67213	0.00324645	0.0913197
TRIM4	8.94317	0	0	35.2042	24.4407	16.7926	-14.1084	-3.81848	0.00320516	0.0913197
ATP6V0E2	2.98106	0	0	16.2481	9.77627	33.5853	-23.7576	-4.57031	0.00324289	0.0913197
LACC1	0	1.38043	1.30908	24.3721	48.8813	0	-18.2345	-4.1886	0.00326389	0.0913197
ARF6	53.659	288.51	422.833	56.8683	58.6576	25.189	5.42286	2.43905	0.00323773	0.0913197
RBM25	65.5833	404.466	390.106	59.5764	58.6576	41.9816	5.36364	2.42321	0.00323407	0.0913197
C14orf79	2.98106	0	0	8.12405	14.6644	41.9816	-24.1393	-4.59331	0.00315163	0.0913197
TNRC6A	80.4885	392.042	493.523	54.1603	92.8745	16.7926	5.92884	2.56775	0.00325134	0.0913197
ZNF75D	5.96211	0	0	21.6641	9.77627	33.5853	-16.1452	-4.01304	0.0031748	0.0913197
PLXNB1	8.94317	11.0434	5.23632	48.7443	29.3288	67.1706	-5.8135	-2.53941	0.00339654	0.0940441
RPL22L1	59.6211	226.39	268.362	37.9122	19.5525	37.7834	5.73503	2.5198	0.00343936	0.0940441
SLC17A5	35.7727	2.76086	2.61816	102.905	87.9864	58.7742	-6.64294	-2.73182	0.00344151	0.0940441
MAN1A1	20.8674	153.228	217.307	27.0802	24.4407	16.7926	5.68781	2.50787	0.00340687	0.0940441
ZNF33B_1	0	0	1.30908	10.8321	34.2169	16.7926	-22.6239	-4.49977	0.00343529	0.0940441
GPR162	2.98106	5.52171	1.30908	13.5401	39.1051	50.3779	-9.22589	-3.20569	0.00343322	0.0940441
RP11-66N24.3	2.98106	0	0	29.7882	9.77627	12.5945	-23.0292	-4.52539	0.00339125	0.0940441
TK2	20.8674	9.663	6.5454	64.9924	39.1051	75.5669	-5.76698	-2.52782	0.00337739	0.0940441
TBC1D3F	0	0	0	35.2042	53.7695	0	-102.143	-6.67445	0.00343592	0.0940441
SEMA6C	5.96211	2.76086	0	27.0802	19.5525	37.7834	-11.4995	-3.5235	0.00350563	0.0949124
JADE1	5.96211	263.662	161.017	16.2481	19.5525	29.3871	6.60729	2.72406	0.00348781	0.0949124
PSPH	17.8863	63.4997	100.799	13.5401	4.88813	4.19816	7.3683	2.88133	0.00350927	0.0949124
INSR	2.98106	64.8801	70.6903	8.12405	0	0	13.4731	3.75201	0.00349728	0.0949124
ATP6V1H	68.5643	513.519	577.305	78.5325	53.7695	67.1706	5.78366	2.53198	0.00357542	0.096454
TIMM10B_1	14.9053	0	0	40.6202	48.8813	29.3871	-9.94734	-3.31431	0.00362009	0.0971688
DDX26B	0	49.6954	68.0722	2.70802	0	0	28.8309	4.84954	0.00362034	0.0971688
MYO1B	41.7348	273.325	270.98	27.0802	24.4407	50.3779	5.77095	2.52881	0.00365587	0.0976258
UBE2B	74.5264	237.434	392.724	54.1603	53.7695	33.5853	4.97511	2.31473	0.00370046	0.0976258
RP11-349A22.5	8.94317	0	0	21.6641	24.4407	25.189	-12.2108	-3.61009	0.00368685	0.0976258
HSPA2	44.7159	15.1847	51.0541	0	0	8.39632	13.224	3.72508	0.00368668	0.0976258
RP11-1035H13.3	53.659	70.4019	31.4179	13.5401	0	0	8.43055	3.07563	0.0036847	0.0976258
RP11-51O6.1	0	289.89	284.07	0	0	0	717.337	9.48651	0.00369448	0.0976258
JUP	50.678	56.5976	40.5815	62.2844	219.966	491.185	-5.18899	-2.37545	0.00370215	0.0976258
RAB28	14.9053	62.1193	57.5995	0	14.6644	0	10.7454	3.42565	0.00375193	0.0977419
YTHDC1	116.261	262.281	308.943	64.9924	48.8813	29.3871	4.72632	2.24072	0.00373218	0.0977419
PAN2	98.3749	67.641	95.5629	13.5401	24.4407	12.5945	5.25741	2.39435	0.00375289	0.0977419
MON2	17.8863	175.314	201.598	27.0802	34.2169	4.19816	6.00288	2.58566	0.00372441	0.0977419
ARSD	8.94317	0	0	18.9561	24.4407	29.3871	-12.2128	-3.61032	0.00373583	0.0977419
ANAPC1	11.9242	285.749	295.852	43.3283	24.4407	20.9908	6.58492	2.71917	0.00389845	0.0991168
ACVR2A	5.96211	74.5431	100.799	8.12405	9.77627	4.19816	8.07946	3.01426	0.00383024	0.0991168
METAP1D	14.9053	41.4129	37.9633	2.70802	0	0	22.965	4.52137	0.00382106	0.0991168
DOCK8	0	51.0759	64.1449	0	4.88813	0	23.8006	4.57293	0.00386382	0.0991168
TNC	0	236.053	325.961	0	0	0	702.457	9.45627	0.00386054	0.0991168
ZNF33A	2.98106	1.38043	0	21.6641	24.4407	12.5945	-14.3758	-3.84557	0.00387996	0.0991168
NUAK1	17.8863	2.76086	5.23632	46.0363	83.0983	20.9908	-6.48061	-2.69613	0.00389106	0.0991168
TRPM7	23.8485	408.607	378.324	37.9122	78.2101	16.7926	6.13287	2.61656	0.00389827	0.0991168
RP11-1407O15.2	11.9242	0	0	24.3721	73.322	16.7926	-11.2672	-3.49406	0.00385105	0.0991168
RBBP7	56.6401	343.727	354.761	51.4523	53.7695	46.1798	4.99768	2.32126	0.00389965	0.0991168
RP3-395M20.8	0	0	0	24.3721	29.3288	16.7926	-80.9809	-6.33951	0.00391218	0.099151
ETNK2	2.98106	0	0	18.9561	9.77627	20.9908	-20.8217	-4.38001	0.00391979	0.099151
C1orf115	32.7916	4.14129	0	64.9924	63.5457	109.152	-6.88198	-2.78282	0.00395963	0.099505
KLHL7	17.8863	150.467	124.363	21.6641	19.5525	8.39632	5.81558	2.53992	0.00396209	0.099505
NOC3L	26.8295	46.9346	49.7451	5.41603	4.88813	8.39632	6.94921	2.79685	0.00394498	0.099505
CROCCP2	8.94317	0	0	27.0802	29.3288	16.7926	-12.8434	-3.68296	0.00402245	0.100542
CNBP	193.769	1303.12	1432.13	146.233	136.868	197.314	6.09843	2.60844	0.00401839	0.100542
PSMD14	160.977	294.031	361.306	94.7806	48.8813	20.9908	4.80802	2.26544	0.00405916	0.10062
LRRK2	0	42.7933	70.6903	0	4.88813	0	23.4215	4.54976	0.00405711	0.10062
CTIF	14.9053	20.7064	18.3271	83.9485	122.203	71.3687	-4.76588	-2.25274	0.00405095	0.10062
RAP2C	23.8485	113.195	90.3266	18.9561	4.88813	8.39632	6.52015	2.70491	0.00406373	0.10062
PRDX6	348.784	1470.16	2353.73	227.473	117.315	348.447	6.01113	2.58764	0.00408024	0.100655
RAMP3	0	267.803	263.125	0	0	0	663.723	9.37444	0.00408421	0.100655
HSP90B3P	0	263.662	263.125	0	0	0	658.564	9.36318	0.00411882	0.100801
CACYBP	107.318	233.292	473.887	75.8245	39.1051	50.3779	4.85574	2.27969	0.004116	0.100801
CDC42EP3	59.6211	8.28257	9.16356	97.4886	185.749	100.756	-5.25298	-2.39314	0.00411215	0.100801
RTN4	667.757	3354.44	3730.88	574.099	542.583	335.853	5.3358	2.41571	0.00414962	0.10132
MME	8.94317	0	0	27.0802	39.1051	12.5945	-13.1098	-3.71258	0.00419274	0.101901
ABCF2	65.5833	387.9	354.761	70.4084	34.2169	54.5761	5.01857	2.32728	0.00418328	0.101901
NPIPA7_1	8.94317	0	0	27.0802	29.3288	12.5945	-12.2074	-3.60968	0.00420956	0.102074
CALHM2	2.98106	9.663	6.5454	40.6202	34.2169	58.7742	-6.01295	-2.58807	0.00424963	0.102569
NAA25	17.8863	151.847	147.926	18.9561	29.3288	8.39632	5.65203	2.49877	0.00425912	0.102569
GLTSCR2	89.4317	41.4129	43.1997	157.065	151.532	491.185	-4.66629	-2.22228	0.00424788	0.102569
HIVEP2	71.5454	132.521	77.2358	24.3721	24.4407	8.39632	4.82936	2.27183	0.00426977	0.102591
UBE2N	86.4507	211.206	201.598	37.9122	39.1051	25.189	4.90759	2.29502	0.00429016	0.102847
SHC2	8.94317	0	0	13.5401	24.4407	37.7834	-11.8344	-3.56491	0.00430999	0.103088
HSPA4	286.181	1145.76	1426.9	135.401	195.525	167.926	5.7539	2.52454	0.00434183	0.103462
SEPT7	134.148	655.704	587.777	92.0726	97.7627	54.5761	5.63566	2.49458	0.00434526	0.103462
ODF2	56.6401	128.38	107.345	18.9561	24.4407	20.9908	4.72553	2.24048	0.00437389	0.103676
ZNF521	23.8485	17.9456	7.85448	92.0726	127.091	29.3871	-5.16503	-2.36878	0.00436882	0.103676
PLA2G16	47.6969	2.76086	1.30908	100.197	73.322	159.53	-6.7517	-2.75525	0.00438864	0.103792
SLC40A1	11.9242	414.129	564.214	37.9122	87.9864	16.7926	6.9628	2.79967	0.00440525	0.103803
JDP2	2.98106	26.2281	82.4721	2.70802	4.88813	0	13.8994	3.79695	0.0044186	0.103803
TRIM25	119.242	30.3694	57.5995	308.714	303.064	298.069	-4.56475	-2.19054	0.00441253	0.103803
XXYLT1-AS2	5.96211	0	0	5.41603	9.77627	62.9724	-15.053	-3.91198	0.00443837	0.103805
RENBP	0	0	0	10.8321	19.5525	41.9816	-80.431	-6.32968	0.00443297	0.103805
ZNF205	11.9242	2.76086	1.30908	16.2481	43.9932	50.3779	-8.03632	-3.00654	0.00448265	0.104608
ZBTB40	8.94317	22.0869	20.9453	111.029	107.539	58.7742	-4.88347	-2.28791	0.00475181	0.105639
PALMD	59.6211	0	0	86.6565	215.078	167.926	-7.99871	-2.99977	0.00455226	0.105639
NVL	14.9053	106.293	99.4901	8.12405	9.77627	16.7926	6.46097	2.69175	0.00475399	0.105639
RBMS1	83.4696	400.324	435.924	102.905	39.1051	29.3871	5.25934	2.39488	0.00471448	0.105639
CCRL2	2.98106	0	0	13.5401	19.5525	16.7926	-19.3637	-4.27528	0.00463021	0.105639
ITGB5	140.11	8.28257	20.9453	273.51	234.63	419.816	-5.58619	-2.48186	0.0046185	0.105639
SMC4	35.7727	92.4887	79.8539	18.9561	9.77627	4.19816	5.85868	2.55058	0.0046085	0.105639
ELF2	20.8674	99.3909	132.217	13.5401	14.6644	16.7926	5.66324	2.50163	0.00454524	0.105639
GAB1	5.96211	0	0	16.2481	24.4407	20.9908	-14.3773	-3.84572	0.00472486	0.105639
NUP155	20.8674	95.2496	60.2177	10.8321	0	12.5945	6.99715	2.80677	0.00458552	0.105639
TCERG1	41.7348	205.684	193.744	40.6202	29.3288	16.7926	5.00432	2.32318	0.00470027	0.105639
ANKIB1	44.7159	277.466	285.38	37.9122	58.6576	16.7926	5.39702	2.43216	0.00474058	0.105639
RELN	2.98106	0	0	40.6202	19.5525	0	-22.0797	-4.46465	0.00469516	0.105639
FAM49B	47.6969	153.228	119.126	13.5401	39.1051	16.7926	4.88956	2.2897	0.00474307	0.105639
JAK2	11.9242	73.1627	113.89	5.41603	19.5525	4.19816	7.15091	2.83813	0.00468061	0.105639
FNDC3A	53.659	171.173	261.816	48.7443	29.3288	0	6.06883	2.60142	0.00464809	0.105639
AQR	20.8674	197.401	154.472	21.6641	39.1051	4.19816	5.78356	2.53196	0.0047043	0.105639
SLX1A-SULT1A3	0	0	0	46.0363	0	25.189	-84.6315	-6.40312	0.0046271	0.105639
TEX2	35.7727	557.693	362.615	48.7443	78.2101	37.7834	5.82601	2.54251	0.00468733	0.105639
TNFAIP8L1	26.8295	1.38043	0	27.0802	53.7695	142.737	-8.38736	-3.06822	0.00457723	0.105639
DNASE2	41.7348	2.76086	3.92724	97.4886	39.1051	163.728	-6.57221	-2.71638	0.00475714	0.105639
TMLHE	17.8863	45.5541	31.4179	2.70802	4.88813	0	12.4053	3.63289	0.00461307	0.105639
MT-CO3	1102.99	24.8477	24.8725	2591.57	3113.74	3245.18	-7.77602	-2.95903	0.00459266	0.105639
ITGA1	2.98106	6.90214	1.30908	10.8321	87.9864	16.7926	-9.20603	-3.20258	0.00478259	0.105758
GSDMD	20.8674	1.38043	0	32.4962	34.2169	92.3595	-7.91079	-2.98382	0.00477908	0.105758
LRRK1	26.8295	129.76	140.072	21.6641	29.3288	4.19816	5.38867	2.42993	0.00482221	0.106411
MTX2	44.7159	135.282	125.672	13.5401	29.3288	25.189	4.74561	2.24659	0.00487228	0.107161
ZNF251	5.96211	1.38043	1.30908	10.8321	39.1051	25.189	-9.21389	-3.20381	0.00488665	0.107161
MYO18A	26.8295	288.51	295.852	37.9122	53.7695	16.7926	5.64901	2.498	0.00487829	0.107161
FUBP1	71.5454	519.041	591.704	105.613	63.5457	33.5853	5.77428	2.52964	0.00493011	0.107578
FOXP1	17.8863	253.999	167.562	32.4962	29.3288	16.7926	5.54696	2.4717	0.00493627	0.107578
FEZ1	71.5454	17.9456	15.709	138.109	117.315	193.115	-4.52913	-2.17924	0.00491958	0.107578
HNRNPA2B1	623.041	1880.14	1777.73	278.926	322.617	201.512	5.3389	2.41654	0.00495471	0.107757
USP9X	101.356	864.148	971.338	111.029	161.308	50.3779	6.01003	2.58737	0.00498349	0.10816
TMEM33	59.6211	128.38	252.653	24.3721	48.8813	20.9908	4.80194	2.26362	0.00502933	0.108677
PAPD4	23.8485	124.239	126.981	32.4962	9.77627	0	6.08336	2.60487	0.00503942	0.108677
TMEM14C	29.8106	8.28257	9.16356	43.3283	58.6576	113.35	-4.96137	-2.31074	0.00504852	0.108677
LRRC27	0	0	0	16.2481	24.4407	25.189	-72.5757	-6.18142	0.00504735	0.108677
PGBD1	5.96211	0	0	8.12405	29.3288	29.3871	-14.4939	-3.85737	0.00506264	0.108759
FAM89A	5.96211	0	0	13.5401	19.5525	29.3871	-14.379	-3.84589	0.00507578	0.10882
DOCK10	17.8863	0	0	89.3645	53.7695	8.39632	-9.13729	-3.19177	0.00511336	0.108961
PTPRD	2.98106	0	0	21.6641	9.77627	12.5945	-19.3528	-4.27447	0.00509941	0.108961
GCH1	11.9242	31.7499	65.454	2.70802	9.77627	0	9.28576	3.21502	0.00511145	0.108961
LYVE1	26.8295	70.4019	124.363	192.269	527.918	398.825	-4.919	-2.29837	0.0051304	0.109104
CPEB1	0	200.162	234.325	0	0	0	543.575	9.08634	0.00518409	0.109364
SLCO3A1	0	215.347	219.926	0	0	0	544.551	9.08892	0.00516946	0.109364
ZNF785	2.98106	0	0	16.2481	24.4407	8.39632	-19.3614	-4.27511	0.00518088	0.109364
ABCA6	2.98106	0	0	8.12405	29.3288	16.7926	-19.5784	-4.29119	0.00517982	0.109364
EPB41L5	11.9242	1.38043	0	35.2042	24.4407	25.189	-9.81931	-3.29562	0.00526673	0.109693
ANKHD1-EIF4EBP3	50.678	171.173	200.289	10.8321	14.6644	58.7742	5.09644	2.34949	0.00525435	0.109693
WAC-AS1	5.96211	0	0	27.0802	4.88813	25.189	-14.6437	-3.8722	0.00525712	0.109693
NDRG4	32.7916	11.0434	7.85448	111.029	58.6576	58.7742	-5.05337	-2.33724	0.00527249	0.109693
SLC9A5	5.96211	92.4887	49.7451	0	4.88813	12.5945	8.81838	3.14051	0.00525783	0.109693
ZNF211	2.98106	0	0	16.2481	34.2169	4.19816	-20.6582	-4.36865	0.00526376	0.109693
MAFB	250.409	6.90214	5.23632	13.5401	9.77627	0	10.6482	3.41253	0.00525025	0.109693
USP19	20.8674	292.651	341.67	46.0363	29.3288	41.9816	5.54344	2.47078	0.00530023	0.110053
NR1D1	8.94317	144.945	175.417	10.8321	14.6644	29.3871	6.04616	2.59602	0.00531893	0.110224
TMEM63B	47.6969	320.259	325.961	46.0363	43.9932	54.5761	4.80879	2.26567	0.00534131	0.110471
H6PD	35.7727	6.90214	5.23632	56.8683	92.8745	71.3687	-5.15399	-2.36569	0.0053781	0.110581
AC093838.4	23.8485	1.38043	1.30908	40.6202	63.5457	50.3779	-6.68579	-2.7411	0.00537149	0.110581
SENP1	2.98106	59.3584	52.3632	5.41603	0	4.19816	10.395	3.37782	0.00536095	0.110581
MBD4	2.98106	2.76086	2.61816	35.2042	19.5525	16.7926	-8.6068	-3.10548	0.00541658	0.110879
PLAC8	0	278.847	145.308	0	0	0	530.652	9.05162	0.00541204	0.110879
CYP2R1	2.98106	0	0	10.8321	34.2169	8.39632	-19.6695	-4.29789	0.00542701	0.110879
STK38L	20.8674	66.2606	56.2905	8.12405	9.77627	4.19816	6.56358	2.71448	0.00543462	0.110879
TBPL1	23.8485	63.4997	121.744	2.70802	24.4407	8.39632	6.38344	2.67433	0.00546892	0.111165
PTGR1	366.67	4.14129	7.85448	801.573	889.64	1502.94	-8.46656	-3.08178	0.00548953	0.111165
NACC2	44.7159	9.663	11.7817	81.2405	127.091	88.1614	-4.93179	-2.30211	0.00549081	0.111165
RPUSD1	23.8485	6.90214	3.92724	43.3283	34.2169	88.1614	-5.41603	-2.43724	0.00547309	0.111165
CBFB	53.659	78.6844	120.435	18.9561	24.4407	8.39632	4.96391	2.31148	0.00552104	0.111563
C4orf27	11.9242	38.652	52.3632	2.70802	4.88813	4.19816	9.0608	3.17964	0.00556594	0.111828
ZSCAN31	11.9242	0	0	48.7443	29.3288	16.7926	-10.3475	-3.3712	0.00556196	0.111828
PGM2L1	62.6022	194.64	226.471	40.6202	39.1051	16.7926	4.98215	2.31677	0.00555022	0.111828
COL11A2	8.94317	37.2716	43.1997	2.70802	0	0	21.3504	4.41619	0.00561074	0.112413
GADD45B	1070.2	0	6.5454	21.6641	43.9932	29.3871	11.2618	3.49337	0.00561638	0.112413
CSPP1	14.9053	41.4129	43.1997	2.70802	0	8.39632	9.0114	3.17175	0.00563434	0.112559
LAYN	2.98106	154.608	239.562	0	0	0	497.602	8.95885	0.00567624	0.113182
ITM2C	2.98106	194.64	198.98	0	0	0	496.925	8.95688	0.00568995	0.113218
ZBTB20	0	63.4997	56.2905	0	9.77627	0	12.7673	3.67438	0.00569953	0.113218
ZNF783	0	1.38043	0	10.8321	19.5525	16.7926	-17.9042	-4.16223	0.00574048	0.113817
RND1	74.5264	23.4673	36.6543	8.12405	4.88813	4.19816	6.8134	2.76837	0.00576429	0.113861
ATP2A1	0	38.652	62.8359	2.70802	0	0	24.8637	4.63597	0.00575787	0.113861
LDLRAP1	23.8485	6.90214	7.85448	62.2844	39.1051	50.3779	-4.96078	-2.31057	0.00578673	0.113878
ATRNL1	0	193.26	210.762	0	0	0	505.621	8.98191	0.00578114	0.113878
OXNAD1	0	0	1.30908	10.8321	14.6644	20.9908	-17.9039	-4.1622	0.00585891	0.114668
EHMT2	20.8674	317.499	365.233	32.4962	24.4407	71.3687	5.48132	2.45452	0.00588659	0.114668
SCAF8	20.8674	179.456	197.671	40.6202	24.4407	8.39632	5.29374	2.40429	0.00589236	0.114668
UBE2W	5.96211	120.097	119.126	10.8321	19.5525	8.39632	6.38775	2.67531	0.00590297	0.114668
ZNF510	2.98106	0	0	10.8321	19.5525	16.7926	-17.9004	-4.16192	0.00585165	0.114668
PIDD	32.7916	12.4239	10.4726	32.4962	48.8813	214.106	-5.44164	-2.44404	0.00589099	0.114668
MDK	205.693	0	0	213.933	459.484	1649.88	-11.3136	-3.49999	0.00590245	0.114668
FAM156A	0	0	0	21.6641	29.3288	8.39632	-68.337	-6.0946	0.00591565	0.114703
RAVER2	2.98106	0	0	16.2481	14.6644	12.5945	-17.8939	-4.1614	0.00594616	0.114975
PPIAP9	0	200.162	192.435	0	0	0	491.385	8.94071	0.00597263	0.114975
PRKAR1B	17.8863	1.38043	2.61816	18.9561	53.7695	67.1706	-7.28332	-2.8646	0.00598422	0.114975
CNTNAP3	0	0	0	24.3721	24.4407	8.39632	-68.3233	-6.0943	0.00597719	0.114975
MMD	2.98106	46.9346	62.8359	8.12405	0	0	10.9382	3.4513	0.00597805	0.114975
APOL3	26.8295	0	0	16.2481	63.5457	151.134	-8.93323	-3.15918	0.00606857	0.116384
ZNF197	5.96211	0	0	18.9561	19.5525	16.7926	-13.4872	-3.75352	0.00610993	0.116965
CDK18	0	189.119	191.126	0	0	0	475.999	8.89482	0.00616862	0.117156
KALRN	8.94317	110.434	150.544	10.8321	9.77627	25.189	5.90768	2.56259	0.00614735	0.117156
RWDD2A	5.96211	0	0	21.6641	14.6644	16.7926	-13.4845	-3.75323	0.00618655	0.117156
AP5B1	14.9053	0	2.61816	67.7004	29.3288	20.9908	-8.03113	-3.0056	0.00618403	0.117156
MYL6B	32.7916	2.76086	0	46.0363	24.4407	197.314	-7.82119	-2.96739	0.00614499	0.117156
ATF5	44.7159	147.706	277.525	43.3283	14.6644	33.5853	5.01328	2.32576	0.00615501	0.117156
NEFL	0	194.64	183.271	0	0	0	473.091	8.88597	0.00621872	0.117554
BRPF1	20.8674	149.086	260.507	32.4962	34.2169	16.7926	5.14114	2.36209	0.00623148	0.117584
DPYD	2.98106	0	0	18.9561	14.6644	8.39632	-17.891	-4.16117	0.00626401	0.117837
EPC2	23.8485	82.8257	113.89	21.6641	4.88813	8.39632	5.8243	2.54208	0.00626722	0.117837
PIK3IP1	5.96211	1.38043	0	8.12405	19.5525	41.9816	-10.921	-3.44903	0.00628242	0.117913
PEX10	8.94317	0	1.30908	27.0802	14.6644	29.3871	-10.0094	-3.32328	0.00631854	0.118133
RP11-556K13.1	2.98106	40.0324	49.7451	0	0	4.19816	20.6815	4.37027	0.00644566	0.118133
PUM2	44.7159	510.759	577.305	73.1164	102.651	25.189	5.64169	2.49613	0.00634592	0.118133
UBR3	20.8674	343.727	285.38	48.7443	53.7695	4.19816	6.05644	2.59847	0.00641731	0.118133
SLMAP	32.7916	161.51	178.035	37.9122	19.5525	16.7926	4.87953	2.28674	0.00636508	0.118133
HBEGF	533.609	17.9456	37.9633	35.2042	19.5525	29.3871	6.87158	2.78064	0.00644802	0.118133
ASAH1	20.8674	117.336	104.726	5.41603	19.5525	20.9908	5.56383	2.47608	0.00642149	0.118133
PLAA	59.6211	282.988	256.58	43.3283	58.6576	25.189	4.74892	2.2476	0.00637232	0.118133
AL590710.1	0	0	0	0	19.5525	50.3779	-79.4828	-6.31257	0.00644942	0.118133
JMJD1C	134.148	273.325	412.36	86.6565	73.322	20.9908	4.48603	2.16544	0.00633177	0.118133
VPS35	116.261	549.411	620.504	73.1164	131.98	41.9816	5.24256	2.39027	0.00643958	0.118133
NUFIP2	268.295	182.217	294.543	64.9924	87.9864	25.189	4.18038	2.06363	0.00634507	0.118133
ABHD15	2.98106	0	0	24.3721	0	25.189	-19.6645	-4.29752	0.00645097	0.118133
ZNF74	2.98106	0	0	5.41603	19.5525	25.189	-18.3418	-4.19707	0.00643945	0.118133
SGCE	47.6969	100.771	90.3266	8.12405	4.88813	33.5853	5.33127	2.41448	0.00647211	0.118315
SLC19A2	11.9242	33.1303	57.5995	8.12405	0	0	9.51181	3.24972	0.00655073	0.119339
HNRNPU	283.2	1804.22	1873.29	289.758	259.071	188.917	5.36446	2.42343	0.00654984	0.119339
MRC2	38.7537	1.38043	1.30908	48.7443	117.315	88.1614	-6.47642	-2.6952	0.0065841	0.11974
FAM69B	71.5454	5.52171	5.23632	67.7004	73.322	335.853	-5.9395	-2.57034	0.00659711	0.11977
MAK16	26.8295	71.7823	82.4721	16.2481	4.88813	8.39632	5.6792	2.50569	0.00664253	0.119772
GRAMD1B	0	56.5976	39.2724	0	0	4.19816	20.789	4.37775	0.00662316	0.119772
EBPL	8.94317	0	1.30908	16.2481	19.5525	41.9816	-9.8182	-3.29546	0.00662712	0.119772
ALG12	17.8863	1.38043	2.61816	48.7443	19.5525	58.7742	-7.03547	-2.81465	0.00664263	0.119772
NUP205	26.8295	169.793	183.271	29.7882	29.3288	20.9908	4.74097	2.24518	0.00672889	0.120914
TNPO2	38.7537	360.292	413.669	64.9924	43.9932	58.7742	4.82336	2.27004	0.00672121	0.120914
AGAP2-AS1	8.94317	0	0	18.9561	9.77627	54.5761	-11.6262	-3.5393	0.00674954	0.121079
DNM1L	62.6022	287.129	306.325	29.7882	73.322	41.9816	4.62235	2.20862	0.00678445	0.121498
GPRASP2	5.96211	1.38043	0	24.3721	4.88813	29.3871	-10.9374	-3.45119	0.00679761	0.121527
PINK1	56.6401	11.0434	10.4726	70.4084	97.7627	176.323	-4.65181	-2.21779	0.00683104	0.121645
EVC	32.7916	2.76086	1.30908	78.5325	97.7627	33.5853	-6.14778	-2.62006	0.00684401	0.121645
TENC1	29.8106	331.303	305.016	16.2481	63.5457	50.3779	5.1986	2.37812	0.00685029	0.121645
GGNBP2	74.5264	296.792	396.651	70.4084	63.5457	37.7834	4.4591	2.15675	0.00684275	0.121645
EVI5	14.9053	157.369	157.09	37.9122	14.6644	4.19816	5.57361	2.47861	0.00688214	0.121891
ACADL	2.98106	142.184	191.126	0	0	0	421.82	8.72048	0.00692775	0.121891
ROBO3	5.96211	1.38043	1.30908	13.5401	9.77627	46.1798	-8.87995	-3.15055	0.00694504	0.121891
MED21	11.9242	51.0759	68.0722	8.12405	4.88813	4.19816	7.20465	2.84893	0.00693831	0.121891
CDCA4	17.8863	0	0	16.2481	58.6576	67.1706	-8.6988	-3.12082	0.00691017	0.121891
SPATC1L	2.98106	0	0	16.2481	4.88813	20.9908	-17.8924	-4.16128	0.00694444	0.121891
HDAC10	8.94317	11.0434	5.23632	37.9122	43.9932	54.5761	-5.23797	-2.38901	0.00692838	0.121891
MEIS2	2.98106	211.206	133.526	5.41603	29.3288	20.9908	6.3421	2.66496	0.00696547	0.122046
COL17A1	2.98106	0	0	18.9561	4.88813	16.7926	-17.8896	-4.16105	0.00698527	0.12219
TIMP3	0	200.162	143.999	0	0	0	431.032	8.75165	0.00705251	0.123162
CLK1	175.882	167.032	197.671	43.3283	39.1051	37.7834	4.44213	2.15125	0.00706507	0.123178
COPS2	38.7537	375.477	333.816	24.3721	107.539	8.39632	5.39682	2.43211	0.00710785	0.123322
RP11-264B14.2	0	169.793	171.49	0	0	0	427.465	8.73966	0.00710103	0.123322
FN3K	8.94317	0	0	24.3721	14.6644	20.9908	-10.9359	-3.45101	0.00710845	0.123322
INHBB	0	247.097	95.5629	0	0	0	429.092	8.74514	0.00716249	0.123448
C16orf72	86.4507	194.64	312.87	54.1603	58.6576	8.39632	4.87485	2.28536	0.00715408	0.123448
CTC-241F20.3	8.94317	0	0	18.9561	19.5525	25.189	-10.9399	-3.45153	0.00715973	0.123448
FCGRT	86.4507	0	0	181.437	136.868	398.825	-8.36841	-3.06495	0.00714994	0.123448
TMEM127	53.659	27.6086	31.4179	138.109	146.644	117.548	-3.91646	-1.96955	0.0071881	0.12353
ME1	53.659	237.434	268.362	51.4523	43.9932	16.7926	4.93718	2.30369	0.00719069	0.12353
IFI16	89.4317	2.76086	2.61816	227.473	190.637	151.134	-6.1442	-2.61922	0.00723526	0.124093
OPA1	26.8295	207.064	184.58	40.6202	29.3288	16.7926	4.7604	2.25108	0.00734288	0.124871
PAQR8	8.94317	1.38043	0	18.9561	14.6644	33.5853	-9.02218	-3.17348	0.00735163	0.124871
STAG3L3	2.98106	0	0	10.8321	34.2169	4.19816	-18.0524	-4.17412	0.00732306	0.124871
NINJ1	53.659	11.0434	9.16356	75.8245	68.4339	197.314	-4.86382	-2.28209	0.00734821	0.124871
CLEC2B	20.8674	0	0	24.3721	48.8813	83.9632	-8.15028	-3.02685	0.00729629	0.124871
KRT20	0	98.0104	238.253	0	0	0	421.184	8.71831	0.00731447	0.124871
RP11-824M15.3	0	167.032	163.635	0	0	0	414.242	8.69433	0.00738706	0.125271
SEC31B	8.94317	1.38043	1.30908	27.0802	29.3288	16.7926	-8.20157	-3.0359	0.00743027	0.125707
TOX2	17.8863	1.38043	0	37.9122	43.9932	37.7834	-7.67619	-2.94039	0.00743658	0.125707
ACKR3	5.96211	48.315	37.9633	5.41603	0	0	12.3751	3.62937	0.00755582	0.125723
HCG18	0	0	0	13.5401	9.77627	29.3871	-59.9207	-5.90498	0.00755672	0.125723
MADD	65.5833	17.9456	11.7817	108.321	112.427	146.936	-4.11761	-2.04181	0.00745326	0.125723
APOLD1	71.5454	35.8911	11.7817	140.817	444.82	50.3779	-5.38647	-2.42934	0.00753209	0.125723
RP11-977G19.10	0	63.4997	66.7631	2.70802	9.77627	0	10.4827	3.38994	0.00755071	0.125723
FLYWCH1	74.5264	6.90214	10.4726	176.021	112.427	125.945	-4.725	-2.24031	0.00747208	0.125723
ALDH3A2	44.7159	23.4673	26.1816	89.3645	151.532	113.35	-3.90772	-1.96633	0.00750101	0.125723
AC005562.1	2.98106	0	0	13.5401	29.3288	4.19816	-17.8668	-4.15921	0.00750016	0.125723
PIAS2	26.8295	106.293	112.581	18.9561	19.5525	12.5945	4.82848	2.27157	0.00755352	0.125723
LDOC1L	11.9242	0	0	43.3283	48.8813	8.39632	-9.93752	-3.31289	0.00754586	0.125723
NBEAL1	23.8485	124.239	157.09	29.7882	24.4407	8.39632	4.79621	2.2619	0.00762346	0.126027
AGFG1	65.5833	320.259	405.815	81.2405	68.4339	8.39632	4.96911	2.31299	0.0076089	0.126027
SACM1L	23.8485	187.738	137.453	43.3283	14.6644	4.19816	5.37115	2.42523	0.00765241	0.126027
LINC00969	26.8295	4.14129	0	56.8683	58.6576	50.3779	-5.93087	-2.56824	0.0077184	0.126027
PSMG3	2.98106	2.76086	2.61816	13.5401	9.77627	58.7742	-8.95733	-3.16307	0.00768248	0.126027
OXR1	11.9242	187.738	181.962	13.5401	48.8813	0	6.18879	2.62966	0.00770106	0.126027
RARG	11.9242	86.967	90.3266	5.41603	19.5525	8.39632	5.98809	2.5821	0.00767762	0.126027
LINC00520	5.96211	0	0	16.2481	9.77627	25.189	-12.6011	-3.65547	0.00767318	0.126027
DNAJB1	1925.76	189.119	1107.48	316.838	112.427	138.539	5.63653	2.49481	0.00760303	0.126027
HOMER3	86.4507	81.4453	54.9814	140.817	190.637	629.724	-4.30955	-2.10754	0.00761194	0.126027
ZNF224	11.9242	0	0	32.4962	19.5525	25.189	-10.9953	-3.45881	0.00771607	0.126027
PCDH19	14.9053	31.7499	36.6543	0	4.88813	4.19816	11.3382	3.50311	0.0076924	0.126027
MBTD1	2.98106	55.2171	86.3993	8.12405	9.77627	0	7.81751	2.96671	0.0077308	0.126035
PIK3CD	5.96211	0	1.30908	27.0802	19.5525	8.39632	-10.3013	-3.36476	0.00781129	0.126055
CCNT2	26.8295	157.369	176.726	46.0363	9.77627	12.5945	5.03525	2.33206	0.0077926	0.126055
HSP90AA5P	0	126.999	195.053	0	0	0	403.513	8.65647	0.00774648	0.126055
HSPD1P1	0	142.184	176.726	0	0	0	399.602	8.64242	0.00786167	0.126055
NIPBL	29.8106	372.716	399.27	46.0363	87.9864	25.189	5.06597	2.34084	0.00786353	0.126055
MAPK13	2.98106	0	1.30908	8.12405	19.5525	25.189	-11.7234	-3.55131	0.00784769	0.126055
SGPL1	26.8295	74.5431	111.272	13.5401	14.6644	12.5945	5.27683	2.39967	0.00779765	0.126055
WBP11	53.659	110.434	120.435	32.4962	19.5525	8.39632	4.4818	2.16408	0.00782312	0.126055
MAPKAPK5-AS1	5.96211	0	0	13.5401	14.6644	25.189	-12.6036	-3.65576	0.00779901	0.126055
CDK8	8.94317	151.847	158.399	29.7882	14.6644	12.5945	5.45112	2.44655	0.00778723	0.126055
PHF12	32.7916	189.119	200.289	35.2042	29.3288	29.3871	4.48485	2.16506	0.00784605	0.126055
VPS54	14.9053	96.63	140.072	10.8321	29.3288	8.39632	5.35297	2.42034	0.00791038	0.126399
CALCRL	101.356	429.313	189.817	62.2844	83.0983	16.7926	4.45268	2.15467	0.00792091	0.126399
KIAA2026	11.9242	117.336	133.526	24.3721	19.5525	0	5.82551	2.54239	0.00791602	0.126399
B3GNT2	20.8674	42.7933	45.8178	8.12405	9.77627	0	6.26735	2.64786	0.00796684	0.12694
GPR153	5.96211	0	0	13.5401	29.3288	12.5945	-12.6052	-3.65594	0.00800481	0.127161
PAN3	5.96211	117.336	137.453	16.2481	24.4407	0	6.37158	2.67165	0.00800005	0.127161
TRIP12	184.826	1754.52	2165.22	276.218	347.057	117.548	5.54115	2.47019	0.00808771	0.12734
CMTM7	47.6969	8.28257	9.16356	70.4084	68.4339	163.728	-4.94969	-2.30734	0.00804809	0.12734
BDH2	11.9242	1.38043	0	13.5401	29.3288	54.5761	-8.7807	-3.13434	0.0080968	0.12734
AMD1	44.7159	93.8691	167.562	35.2042	24.4407	4.19816	4.64199	2.21474	0.00810059	0.12734
TUBA1B	1454.76	802.029	717.376	173.313	200.413	247.691	4.78465	2.25841	0.00802973	0.12734
SLC46A1	0	0	0	16.2481	19.5525	12.5945	-55.6982	-5.79956	0.00807774	0.12734
BGN	44.7159	0	1.30908	97.4886	136.868	62.9724	-6.69224	-2.74249	0.00806055	0.12734
ZEB2	41.7348	314.738	515.778	73.1164	83.0983	8.39632	5.28417	2.40168	0.00812118	0.127474
C7orf55-LUC7L2	14.9053	300.933	284.07	27.0802	68.4339	8.39632	5.81791	2.5405	0.00814013	0.127508
RBBP6	143.091	193.26	250.034	54.1603	63.5457	12.5945	4.48827	2.16616	0.00814754	0.127508
LRP1	14.9053	263.662	268.362	16.2481	43.9932	37.7834	5.65113	2.49854	0.00817685	0.127777
PNO1	5.96211	98.0104	83.7812	10.8321	14.6644	4.19816	6.30155	2.65571	0.00827006	0.128158
ZFP62	2.98106	81.4453	64.1449	13.5401	0	4.19816	7.46112	2.89939	0.00829003	0.128158
ZUFSP	5.96211	53.8367	40.5815	8.12405	0	0	9.51736	3.25056	0.00829841	0.128158
CHD7	11.9242	139.423	174.108	29.7882	24.4407	4.19816	5.47266	2.45224	0.00821629	0.128158
RP11-39K24.14	0	193.26	109.963	0	0	0	380.018	8.56992	0.00829797	0.128158
GAS6	35.7727	0	0	43.3283	58.6576	151.134	-7.30705	-2.86929	0.00824111	0.128158
TTC7B	32.7916	265.042	291.925	51.4523	39.1051	29.3871	4.88124	2.28725	0.00826027	0.128158
SUZ12	41.7348	146.325	180.653	40.6202	29.3288	8.39632	4.60265	2.20247	0.00826247	0.128158
BBS1	2.98106	1.38043	2.61816	21.6641	19.5525	16.7926	-8.03347	-3.00602	0.00831316	0.128198
PKD1P1	0	0	0	62.2844	0	0	-73.488	-6.19944	0.00837151	0.128909
SCG2	0	131.141	168.871	0	0	0	376.065	8.55484	0.00842094	0.129481
PTBP2	0	57.978	75.9267	0	9.77627	4.19816	9.95844	3.31592	0.00848405	0.129862
GLRX	38.7537	4.14129	6.5454	121.861	39.1051	75.5669	-5.20939	-2.38112	0.00849068	0.129862
TRAM2	178.863	26.2281	26.1816	292.466	635.457	209.908	-4.98954	-2.31891	0.00854232	0.129862
DFNA5	20.8674	0	0	59.5764	34.2169	46.1798	-7.44354	-2.89599	0.00854236	0.129862
STAG3L5P	2.98106	0	0	10.8321	43.9932	0	-18.8748	-4.23839	0.00854419	0.129862
STRBP	5.96211	81.4453	77.2358	10.8321	4.88813	8.39632	6.53743	2.70872	0.00852947	0.129862
KANSL2	14.9053	172.554	248.725	29.7882	43.9932	12.5945	5.06783	2.34137	0.00852423	0.129862
NFATC2	11.9242	0	0	48.7443	39.1051	8.39632	-9.57898	-3.25987	0.00850455	0.129862
KIAA1551	11.9242	5.52171	2.61816	16.2481	107.539	12.5945	-6.89911	-2.78641	0.00858235	0.130254
AL034548.1	0	0	0	5.41603	9.77627	37.7834	-59.735	-5.9005	0.00860297	0.130379
SRP19	20.8674	8.28257	5.23632	51.4523	39.1051	41.9816	-4.76114	-2.25131	0.00863014	0.130604
C1QL3	0	165.651	129.599	0	0	0	370.118	8.53184	0.00864412	0.130628
GADD45G	196.75	22.0869	62.8359	0	0	0	348.817	8.44633	0.00867106	0.130847
SMC5	20.8674	131.141	136.144	24.3721	24.4407	12.5945	4.68065	2.22671	0.0086842	0.130859
UBR5	62.6022	978.724	1316.94	167.897	180.861	46.1798	5.96357	2.57618	0.00871199	0.13109
UGT1A6	0	151.847	141.381	0	0	0	367.609	8.52203	0.00873817	0.13113
ADCY4	110.299	227.771	153.162	21.6641	63.5457	33.5853	4.39916	2.13723	0.00873952	0.13113
ZNF281	17.8863	117.336	111.272	18.9561	24.4407	4.19816	5.18079	2.37317	0.00877847	0.131444
SEH1L	5.96211	81.4453	83.7812	8.12405	14.6644	4.19816	6.42513	2.68373	0.00878534	0.131444
METAP2	59.6211	346.488	359.997	75.8245	53.7695	46.1798	4.33203	2.11504	0.00880308	0.131502
OAS2	5.96211	0	0	2.70802	29.3288	33.5853	-12.9901	-3.69934	0.00881419	0.131502
BMI1	8.94317	126.999	79.8539	5.41603	19.5525	12.5945	5.96742	2.57711	0.0088591	0.13177
TRIB3	92.4128	4.14129	15.709	457.655	83.0983	96.5577	-5.79751	-2.53543	0.00885071	0.13177
PAXBP1	5.96211	169.793	179.344	27.0802	29.3288	4.19816	5.80501	2.5373	0.00886964	0.13177
SELP	0	111.815	176.726	0	0	0	361.772	8.49894	0.00897097	0.131791
CYFIP2	14.9053	4.14129	0	18.9561	34.2169	62.9724	-6.92473	-2.79176	0.00894074	0.131791
TPD52	0	42.7933	47.1269	0	4.88813	0	18.8275	4.23477	0.00891338	0.131791
GLI4	0	0	0	16.2481	4.88813	25.189	-55.6913	-5.79938	0.00895845	0.131791
AP003068.23	2.98106	0	0	24.3721	4.88813	8.39632	-16.6407	-4.05665	0.00891922	0.131791
ZDHHC17	11.9242	110.434	116.508	18.9561	19.5525	4.19816	5.52253	2.46533	0.00896217	0.131791
RNF152	5.96211	0	0	13.5401	34.2169	8.39632	-12.436	-3.63645	0.00893656	0.131791
ATP7A	14.9053	153.228	222.544	27.0802	43.9932	0	5.49444	2.45797	0.00897102	0.131791
CTC-260E6.2	0	157.369	129.599	0	0	0	359.806	8.49108	0.00899474	0.131956
SHROOM1	2.98106	0	1.30908	10.8321	14.6644	20.9908	-10.8335	-3.43743	0.00902552	0.132224
FAF1	29.8106	147.706	206.835	21.6641	19.5525	46.1798	4.43411	2.14865	0.00905678	0.132314
KLF4	157.996	184.977	191.126	37.9122	73.322	16.7926	4.46106	2.15739	0.00905213	0.132314
MT1X	181.844	0	0	2.70802	4.88813	4.19816	14.6042	3.86831	0.00909499	0.132689
CCNYL1	71.5454	171.173	138.763	35.2042	48.8813	4.19816	4.34646	2.11984	0.00914531	0.132689
R3HDM2	41.7348	245.716	244.798	37.9122	48.8813	25.189	4.7838	2.25816	0.00914231	0.132689
ATP9B	8.94317	133.902	104.726	24.3721	14.6644	4.19816	5.53563	2.46875	0.00912609	0.132689
MPST	44.7159	8.28257	10.4726	51.4523	53.7695	197.314	-4.9819	-2.3167	0.00910828	0.132689
AMPD2	53.659	237.434	265.743	51.4523	43.9932	25.189	4.58751	2.19771	0.00924866	0.13309
EFNA4	0	0	0	13.5401	4.88813	29.3871	-55.7983	-5.80215	0.00918674	0.13309
GPBP1	128.185	124.239	175.417	32.4962	58.6576	25.189	3.86544	1.95063	0.00924778	0.13309
GCLC	38.7537	230.532	336.434	64.9924	43.9932	16.7926	4.75684	2.25	0.00921648	0.13309
DPYSL4	8.94317	0	1.30908	16.2481	24.4407	25.189	-8.52864	-3.09232	0.00921203	0.13309
NOL3	5.96211	0	0	13.5401	24.4407	12.5945	-11.7173	-3.55057	0.00923294	0.13309
PQLC2	17.8863	0	0	21.6641	39.1051	67.1706	-7.95608	-2.99206	0.00933972	0.133648
TATDN2	29.8106	0	6.5454	81.2405	58.6576	54.5761	-5.80753	-2.53793	0.00934484	0.133648
FGF5	11.9242	0	0	32.4962	43.9932	12.5945	-9.35472	-3.22569	0.00935464	0.133648
HELLS	0	40.0324	47.1269	0	0	4.19816	18.9946	4.24752	0.00933689	0.133648
BTG1	157.996	418.27	435.924	105.613	68.4339	62.9724	4.22318	2.07833	0.0093611	0.133648
MAPK6	50.678	262.281	496.142	92.0726	58.6576	20.9908	4.66559	2.22206	0.00936348	0.133648
EZH2	77.5075	37.2716	47.1269	8.12405	14.6644	8.39632	5.04087	2.33367	0.00950047	0.134331
KIF13B	35.7727	17.9456	11.7817	97.4886	83.0983	58.7742	-4.23194	-2.08132	0.00946022	0.134331
ZNF37BP	5.96211	0	0	2.70802	48.8813	16.7926	-13.0607	-3.70716	0.00946878	0.134331
ANKRD13D	26.8295	5.52171	2.61816	48.7443	19.5525	104.954	-5.38183	-2.4281	0.00942721	0.134331
RALGAPA1	26.8295	132.521	136.144	21.6641	39.1051	4.19816	4.62015	2.20794	0.00949681	0.134331
ZC3H14	56.6401	227.771	261.816	27.0802	63.5457	29.3871	4.6696	2.2233	0.00948711	0.134331
CA5BP1	5.96211	4.14129	0	27.0802	14.6644	20.9908	-7.3898	-2.88554	0.00949842	0.134331
SAMD5	0	66.2606	34.0361	0	4.88813	4.19816	11.3616	3.50609	0.00951874	0.134409
PMS2CL	5.96211	0	0	10.8321	14.6644	25.189	-11.7182	-3.55068	0.00953338	0.134436
MAT2A	402.443	1203.73	1422.97	173.313	312.841	142.737	4.84355	2.27607	0.00956698	0.13473
SMURF1	53.659	190.499	260.507	64.9924	24.4407	8.39632	4.9864	2.318	0.00958073	0.134743
PPID	56.6401	128.38	155.781	35.2042	24.4407	25.189	3.97682	1.99161	0.00965292	0.135238
LTBP3	71.5454	53.8367	44.5087	138.109	175.973	352.645	-3.96316	-1.98665	0.00965433	0.135238
SCAF4	29.8106	133.902	172.799	35.2042	19.5525	20.9908	4.35744	2.12348	0.00962911	0.135238
SPTBN1	366.67	3731.3	3975.68	725.748	640.345	281.277	4.89861	2.29237	0.00974244	0.135518
C8orf4	29.8106	114.576	96.872	5.41603	39.1051	4.19816	5.29198	2.40381	0.00972175	0.135518
AEBP2	14.9053	110.434	109.963	5.41603	34.2169	4.19816	5.64039	2.49579	0.00974603	0.135518
SIX4	11.9242	20.7064	39.2724	2.70802	0	0	17.2257	4.10649	0.0097496	0.135518
B4GALT6	8.94317	55.2171	40.5815	8.12405	4.88813	0	7.25061	2.8581	0.00975146	0.135518
MT-ATP8	95.3938	0	1.30908	238.305	415.491	62.9724	-7.47923	-2.90289	0.00970913	0.135518
RP11-316M1.12	0	0	0	0	4.88813	54.5761	-68.1063	-6.08972	0.00981367	0.135668
FAM212A	8.94317	2.76086	0	8.12405	19.5525	67.1706	-8.8346	-3.14317	0.00978707	0.135668
SLC30A9	26.8295	179.456	171.49	32.4962	39.1051	12.5945	4.49685	2.16892	0.00981138	0.135668
POMZP3	2.98106	1.38043	0	10.8321	0	50.3779	-13.6689	-3.77283	0.00980683	0.135668
CCDC41	2.98106	42.7933	41.8906	5.41603	0	0	11.9392	3.57763	0.00984214	0.135883
TSPAN18	65.5833	9.663	2.61816	73.1164	127.091	167.926	-4.89864	-2.29238	0.00986682	0.136046
TM4SF18	47.6969	0	0	67.7004	175.973	88.1614	-7.10681	-2.8292	0.00991633	0.136195
INO80	29.8106	158.749	205.526	32.4962	19.5525	37.7834	4.36321	2.12539	0.00990515	0.136195
SLC7A6OS	0	5.52171	10.4726	40.6202	58.6576	20.9908	-5.84997	-2.54843	0.00989171	0.136195
UBA3	44.7159	186.358	235.634	16.2481	68.4339	16.7926	4.74667	2.24692	0.00997396	0.136453
ARHGEF37	5.96211	0	1.30908	16.2481	29.3288	12.5945	-9.67249	-3.27389	0.00995968	0.136453
CNEP1R1	23.8485	71.7823	44.5087	8.12405	9.77627	8.39632	5.4778	2.4536	0.00996176	0.136453
ST6GALNAC3	8.94317	0	0	37.9122	19.5525	8.39632	-9.95143	-3.3149	0.00998913	0.136484
RP11-713C19.2	0	99.3909	166.253	0	0	0	333.255	8.38048	0.0100127	0.136512
PPP1R10	283.2	69.0214	91.6356	51.4523	34.2169	12.5945	4.34674	2.11993	0.0100688	0.136512
EXTL3	35.7727	42.7933	47.1269	167.897	156.42	130.143	-3.53527	-1.82182	0.0100569	0.136512
LDB1	29.8106	262.281	260.507	43.3283	48.8813	20.9908	4.881	2.28718	0.0100401	0.136512
C16orf87	14.9053	31.7499	31.4179	0	0	8.39632	10.5385	3.3976	0.0100248	0.136512
MT-CO2	1702.18	8.28257	9.16356	3141.3	4418.87	6675.08	-8.28218	-3.05001	0.010067	0.136512
CASD1	0	82.8257	39.2724	0	9.77627	4.19816	9.08254	3.1831	0.0101172	0.136816
HTRA1	155.015	2.76086	1.30908	222.057	312.841	486.987	-6.47762	-2.69546	0.0101132	0.136816
MUL1	26.8295	13.8043	9.16356	67.7004	58.6576	54.5761	-4.24482	-2.0857	0.0101822	0.137518
KIFC2	29.8106	0	0	48.7443	34.2169	113.35	-6.89248	-2.78502	0.0102686	0.138155
COMMD3-BMI1	0	157.369	197.671	27.0802	24.4407	0	6.78147	2.7616	0.0102548	0.138155
HSP90AA1	3019.81	2649.04	4897.27	1121.12	830.983	541.563	4.22647	2.07945	0.0102577	0.138155
NEK1	23.8485	34.5107	37.9633	5.41603	4.88813	4.19816	6.59765	2.72195	0.01029	0.138266
FBXO11	26.8295	316.118	449.015	73.1164	68.4339	20.9908	4.85293	2.27886	0.0103455	0.138703
HSP90AB2P	0	110.434	147.926	0	0	0	324.192	8.34071	0.0103488	0.138703
PLA2R1	26.8295	1.38043	0	73.1164	68.4339	20.9908	-6.19288	-2.63061	0.0103629	0.138716
TPRG1L	89.4317	24.8477	20.9453	170.605	117.315	281.277	-4.38038	-2.13106	0.0104056	0.139111
EGLN3	2.98106	117.336	129.599	0	0	0	314.305	8.29602	0.0104398	0.139391
PIK3R3	50.678	155.988	69.3813	29.7882	24.4407	8.39632	4.30521	2.10608	0.010478	0.139547
MT-ND1	1189.44	66.2606	45.8178	1898.32	2351.19	3173.81	-5.71363	-2.51441	0.0104765	0.139547
TSHZ1	20.8674	165.651	145.308	29.7882	34.2169	8.39632	4.5758	2.19402	0.0104935	0.139578
FAM47E-STBD1_1	8.94317	0	0	27.0802	14.6644	12.5945	-10.1608	-3.34495	0.0105434	0.139747
LIN54	26.8295	48.315	58.9086	16.2481	0	0	6.30931	2.65748	0.010546	0.139747
ENC1	116.261	95.2496	113.89	10.8321	63.5457	8.39632	4.24013	2.08411	0.0105458	0.139747
PYURF	0	0	0	0	0	62.9724	-72.4153	-6.17822	0.010567	0.13985
FAM171A2	5.96211	69.0214	51.0541	8.12405	4.88813	4.19816	6.93485	2.79386	0.0106313	0.140526
FBXW8	2.98106	62.1193	44.5087	10.8321	0	0	8.31754	3.05616	0.0107222	0.14155
EPHX1	29.8106	802.029	746.176	62.2844	83.0983	125.945	5.82313	2.54179	0.0107624	0.141689
C8orf58	11.9242	0	0	16.2481	29.3288	33.5853	-9.06939	-3.181	0.0107689	0.141689
LRP6	23.8485	161.51	215.998	40.6202	24.4407	25.189	4.39093	2.13453	0.0107751	0.141689
RPL10L	0	136.662	113.89	0	0	0	314.458	8.29672	0.0107865	0.141689
SLAIN2	35.7727	154.608	215.998	46.0363	34.2169	12.5945	4.31416	2.10908	0.0108044	0.141706
QKI	104.337	519.041	811.63	94.7806	136.868	54.5761	5.02919	2.33033	0.0108147	0.141706
ISY1-RAB43	38.7537	0	3.92724	78.5325	58.6576	83.9632	-5.48021	-2.45423	0.010892	0.142013
MIDN	396.481	55.2171	69.3813	46.0363	34.2169	29.3871	4.64719	2.21636	0.0108716	0.142013
ZNF226	14.9053	0	0	21.6641	53.7695	29.3871	-8.25022	-3.04443	0.0108787	0.142013
PIR	65.5833	0	0	62.2844	131.98	235.097	-6.62914	-2.72882	0.010875	0.142013
MRPL53	17.8863	0	2.61816	18.9561	19.5525	100.756	-7.33561	-2.87492	0.0110159	0.142555
RYBP	50.678	131.141	214.689	29.7882	53.7695	12.5945	4.20584	2.07239	0.0109566	0.142555
CCDC69	38.7537	0	0	64.9924	58.6576	134.341	-6.87448	-2.78125	0.0109695	0.142555
INTS4	35.7727	102.152	141.381	18.9561	19.5525	29.3871	4.19901	2.07005	0.0109985	0.142555
EEA1	5.96211	259.521	346.906	46.0363	53.7695	4.19816	5.85926	2.55072	0.0110281	0.142555
ZDHHC20	20.8674	56.5976	57.5995	16.2481	0	0	6.55161	2.71185	0.0109928	0.142555
SOX12	20.8674	0	0	37.9122	34.2169	67.1706	-7.34146	-2.87607	0.0110231	0.142555
WDR75	35.7727	162.891	176.726	43.3283	29.3288	16.7926	4.12886	2.04574	0.0110772	0.142664
CREB1	32.7916	89.7279	99.4901	16.2481	24.4407	8.39632	4.66923	2.22319	0.0111042	0.142664
ZNF621	5.96211	0	0	24.3721	19.5525	4.19816	-11.7082	-3.54945	0.0110974	0.142664
DCP1B	2.98106	0	0	16.2481	0	25.189	-16.7066	-4.06234	0.0110802	0.142664
CLASRP	41.7348	113.195	95.5629	13.5401	24.4407	25.189	4.21891	2.07687	0.0110548	0.142664
CYB561D1	5.96211	2.76086	1.30908	29.7882	19.5525	8.39632	-6.98303	-2.80385	0.0111801	0.142779
C1orf54	2.98106	0	1.30908	2.70802	19.5525	29.3871	-11.5007	-3.52365	0.0112496	0.142779
MEMO1	47.6969	146.325	133.526	29.7882	14.6644	37.7834	3.95603	1.98405	0.0112971	0.142779
LIAS	8.94317	38.652	41.8906	5.41603	0	4.19816	8.13338	3.02386	0.0112992	0.142779
HNRNPAB	304.068	534.226	553.741	129.985	83.0983	104.954	4.32084	2.11131	0.0112831	0.142779
WDR27	5.96211	0	0	13.5401	14.6644	16.7926	-10.8292	-3.43686	0.0113162	0.142779
ANGPTL2	5.96211	0	1.30908	16.2481	19.5525	16.7926	-9.03554	-3.17561	0.0111728	0.142779
ABI1	74.5264	382.379	369.161	92.0726	73.322	25.189	4.30476	2.10593	0.011171	0.142779
EPC1	32.7916	59.3584	94.2538	16.2481	19.5525	4.19816	4.68407	2.22776	0.0112618	0.142779
BAG3	1445.81	194.64	831.266	278.926	112.427	92.3595	5.06385	2.34024	0.0111376	0.142779
GDPD5	47.6969	33.1303	7.85448	59.5764	102.651	201.512	-4.18162	-2.06406	0.0113105	0.142779
ENO3	5.96211	42.7933	43.1997	5.41603	0	4.19816	8.33976	3.06001	0.0112909	0.142779
UBBP4	5.96211	67.641	161.017	0	0	0	295.515	8.20709	0.0112625	0.142779
SGSH	98.3749	12.4239	9.16356	116.445	146.644	260.286	-4.48815	-2.16612	0.0111984	0.142779
ZNF320	8.94317	0	0	18.9561	39.1051	8.39632	-9.68497	-3.27575	0.0111884	0.142779
PPP2CA	160.977	782.703	852.211	143.525	171.085	58.7742	4.81302	2.26694	0.0113298	0.14278
TCEA1P2	0	110.434	130.908	0	0	0	303.002	8.24318	0.0113681	0.143092
PHF14	23.8485	252.618	181.962	13.5401	34.2169	50.3779	4.75071	2.24814	0.0113875	0.143165
VAMP5	50.678	1.38043	1.30908	73.1164	29.3288	226.701	-6.34624	-2.6659	0.0114827	0.143764
INPP5K	29.8106	8.28257	5.23632	62.2844	29.3288	96.5577	-4.81956	-2.2689	0.0114738	0.143764
SPECC1	11.9242	57.978	64.1449	5.41603	4.88813	12.5945	5.97885	2.57987	0.0114607	0.143764
NKRF	20.8674	30.3694	35.3452	5.41603	4.88813	0	7.81924	2.96703	0.0114897	0.143764
PRPS1	20.8674	51.0759	45.8178	8.12405	14.6644	0	5.5303	2.46736	0.0115144	0.143903
RCCD1	5.96211	0	1.30908	21.6641	14.6644	12.5945	-9.03227	-3.17509	0.0115659	0.144375
DYRK1A	14.9053	190.499	272.289	35.2042	48.8813	8.39632	5.16623	2.36911	0.0116584	0.145358
CTD-3232M19.2	17.8863	5.52171	0	8.12405	34.2169	113.35	-6.91117	-2.78893	0.0116812	0.145386
IFT81	2.98106	37.2716	34.0361	2.70802	0	0	17.9157	4.16315	0.0116882	0.145386
NPHP4	2.98106	0	1.30908	16.2481	14.6644	8.39632	-9.94293	-3.31367	0.0117542	0.145644
EVA1B	29.8106	6.90214	6.5454	46.0363	4.88813	188.917	-5.68361	-2.50681	0.0117665	0.145644
GPHN	8.94317	46.9346	34.0361	5.41603	4.88813	0	8.08944	3.01604	0.0117419	0.145644
METRN	8.94317	1.38043	3.92724	24.3721	19.5525	37.7834	-6.62202	-2.72727	0.011778	0.145644
TGIF2	2.98106	1.38043	0	10.8321	14.6644	16.7926	-9.94591	-3.3141	0.0117587	0.145644
DNAJB4	140.11	209.825	623.122	94.7806	102.651	12.5945	4.61969	2.2078	0.0119417	0.145825
CAPG	77.5075	517.661	513.16	78.5325	29.3288	130.143	4.64069	2.21434	0.0118267	0.145825
NMI	14.9053	0	0	24.3721	34.2169	37.7834	-7.9636	-2.99342	0.0119143	0.145825
VPRBP	35.7727	131.141	150.544	27.0802	34.2169	16.7926	4.12174	2.04325	0.0119242	0.145825
PSMD5	44.7159	149.086	172.799	24.3721	43.9932	25.189	4.04521	2.01621	0.011915	0.145825
RASSF4	5.96211	0	0	10.8321	14.6644	20.9908	-10.831	-3.43709	0.0118592	0.145825
NEAT1	113.28	9.663	11.7817	178.729	527.918	29.3871	-5.52206	-2.46521	0.0118999	0.145825
TMEM218	2.98106	0	1.30908	18.9561	9.77627	8.39632	-9.94092	-3.31338	0.0119575	0.145825
FUS	488.893	739.91	642.759	157.065	161.308	130.143	4.19626	2.06911	0.0119456	0.145825
RHOT1	26.8295	171.173	178.035	21.6641	48.8813	20.9908	4.20893	2.07346	0.0119561	0.145825
GABPA	8.94317	96.63	120.435	21.6641	14.6644	4.19816	5.40675	2.43476	0.011839	0.145825
EWSR1	211.655	1040.84	1097.01	197.685	127.091	172.125	4.71611	2.2376	0.0119585	0.145825
RP11-26F2.1	0	27.6086	54.9814	0	0	4.19816	17.9958	4.16959	0.0120137	0.145991
YIPF2	17.8863	5.52171	6.5454	37.9122	34.2169	50.3779	-4.79984	-2.26299	0.0119963	0.145991
ZNF134	8.94317	0	0	40.6202	9.77627	12.5945	-9.30921	-3.21866	0.0120069	0.145991
SLC26A11	8.94317	13.8043	11.7817	40.6202	43.9932	67.1706	-4.01118	-2.00403	0.0120302	0.146024
ADH7	0	93.8691	134.835	0	0	0	287.264	8.16623	0.0121515	0.147326
TBC1D16	56.6401	13.8043	9.16356	100.197	112.427	92.3595	-4.13844	-2.04909	0.0121863	0.147579
TMEM55A	2.98106	89.7279	102.108	13.5401	0	16.7926	6.16291	2.62361	0.0122946	0.148379
ARHGEF25	2.98106	28.989	39.2724	2.70802	0	0	17.2135	4.10547	0.0122733	0.148379
ZNF480	8.94317	1.38043	0	21.6641	19.5525	16.7926	-8.0297	-3.00535	0.0122934	0.148379
ZNF394	14.9053	1.38043	2.61816	21.6641	29.3288	46.1798	-6.44945	-2.68918	0.0123193	0.148429
ISOC2	14.9053	4.14129	5.23632	37.9122	14.6644	67.1706	-5.57986	-2.48023	0.0123268	0.148429
SNED1	11.9242	5.52171	3.92724	35.2042	43.9932	20.9908	-5.29757	-2.40533	0.0123883	0.148998
IFIT2	110.299	1.38043	0	0	0	4.19816	23.1113	4.53053	0.0124723	0.149838
SWT1	2.98106	24.8477	77.2358	0	9.77627	4.19816	8.07228	3.01298	0.0125905	0.150107
SLC8A1	0	107.673	112.581	0	0	0	276.745	8.11241	0.0125686	0.150107
NIF3L1	17.8863	45.5541	49.7451	5.41603	4.88813	12.5945	5.27948	2.40039	0.0125481	0.150107
MCM2	20.8674	46.9346	39.2724	8.12405	9.77627	4.19816	5.11673	2.35522	0.012595	0.150107
TPBG	11.9242	126.999	91.6356	24.3721	14.6644	4.19816	5.14619	2.3635	0.0125936	0.150107
DNAJC2	32.7916	165.651	140.072	21.6641	24.4407	37.7834	4.10419	2.0371	0.0125597	0.150107
YAP1	23.8485	110.434	130.908	29.7882	24.4407	0	4.77679	2.25604	0.0126085	0.150107
VASH1	5.96211	13.8043	1.30908	29.7882	53.7695	41.9816	-5.51343	-2.46295	0.0125201	0.150107
CDC20	41.7348	20.7064	13.0908	2.70802	0	0	15.9941	3.99947	0.012727	0.150124
TMCC2	0	51.0759	48.436	5.41603	4.88813	0	8.91233	3.1558	0.0127726	0.150124
ANKRD30BL	122.223	0	0	0	4.88813	0	23.3805	4.54723	0.01267	0.150124
TLK1	11.9242	186.358	170.18	43.3283	19.5525	12.5945	4.76673	2.253	0.0127693	0.150124
CTD-2228K2.7	11.9242	0	0	32.4962	14.6644	29.3871	-9.1338	-3.19122	0.0126396	0.150124
HEBP2	47.6969	0	0	70.4084	73.322	159.53	-6.50543	-2.70165	0.0127187	0.150124
TUSC3	2.98106	118.717	90.3266	0	0	0	267.133	8.06142	0.0127808	0.150124
PRMT3	17.8863	59.3584	57.5995	10.8321	9.77627	4.19816	5.36711	2.42414	0.0127785	0.150124
ZNF500	5.96211	0	0	8.12405	29.3288	12.5945	-10.8506	-3.43971	0.0127498	0.150124
FBXO31	29.8106	8.28257	2.61816	40.6202	48.8813	79.7651	-4.61532	-2.20643	0.0127647	0.150124
UBTF	56.6401	266.423	489.596	56.8683	73.322	67.1706	4.14153	2.05016	0.0127187	0.150124
NARF	125.204	17.9456	7.85448	159.773	166.197	382.033	-4.78101	-2.25732	0.0126867	0.150124
TOMM70A	59.6211	311.977	290.616	73.1164	63.5457	25.189	4.07071	2.02528	0.0128217	0.150232
ATP8A1	0	34.5107	41.8906	2.70802	0	0	18.7183	4.22638	0.0128668	0.150232
AFF1	38.7537	20.7064	40.5815	140.817	151.532	58.7742	-3.55439	-1.8296	0.0128819	0.150232
SMARCAD1	14.9053	131.141	137.453	21.6641	34.2169	4.19816	4.75019	2.24799	0.0129466	0.150232
LMBRD2	23.8485	37.2716	41.8906	8.12405	9.77627	0	5.75855	2.52571	0.0129311	0.150232
MIOS	14.9053	51.0759	52.3632	13.5401	0	4.19816	5.6611	2.50108	0.0128468	0.150232
PMPCB	29.8106	154.608	181.962	21.6641	39.1051	29.3871	4.16209	2.05731	0.0128614	0.150232
ACSL5	2.98106	85.5866	86.3993	2.70802	14.6644	12.5945	6.0526	2.59756	0.0128661	0.150232
CSNK2A3	0	106.293	108.654	0	0	0	270.136	8.07754	0.0129454	0.150232
FAM195B	74.5264	9.663	11.7817	86.6565	48.8813	289.673	-4.54922	-2.18562	0.012906	0.150232
ZNF444	17.8863	1.38043	0	54.1603	9.77627	58.7742	-7.11996	-2.83187	0.0129185	0.150232
TRIB2	0	84.2061	70.6903	5.41603	9.77627	8.39632	6.58773	2.71978	0.0129891	0.150489
FLT4	8.94317	164.271	111.272	24.3721	19.5525	16.7926	4.64649	2.21614	0.0130475	0.150489
FKBP9L	2.98106	37.2716	30.1089	0	0	4.19816	16.0241	4.00217	0.0130448	0.150489
CD82	14.9053	1.38043	0	29.7882	14.6644	54.5761	-7.2313	-2.85426	0.013052	0.150489
MRPS34	23.8485	11.0434	13.0908	35.2042	39.1051	125.945	-4.29118	-2.10137	0.0130046	0.150489
AC011933.1	0	0	0	0	0	54.5761	-62.8219	-5.9732	0.0130544	0.150489
RASGRP3	23.8485	454.161	445.087	56.8683	73.322	67.1706	4.68768	2.22888	0.0132053	0.150986
TFPI	74.5264	6.90214	0	102.905	210.19	117.548	-5.391	-2.43055	0.0131411	0.150986
FZD5	5.96211	28.989	43.1997	2.70802	4.88813	0	10.0563	3.33003	0.0131916	0.150986
ARPC4-TTLL3	5.96211	30.3694	41.8906	5.41603	0	0	10.5172	3.39468	0.0132218	0.150986
WNT5A	0	59.3584	19.6362	2.70802	0	0	19.4522	4.28186	0.0132296	0.150986
HOXA11-AS	5.96211	0	0	18.9561	4.88813	16.7926	-10.8248	-3.43627	0.0132506	0.150986
LETMD1	5.96211	8.28257	2.61816	24.3721	39.1051	33.5853	-5.37884	-2.42729	0.0131454	0.150986
OVCA2	29.8106	2.76086	0	40.6202	39.1051	88.1614	-5.52439	-2.46582	0.0132218	0.150986
HSD17B1	11.9242	0	0	21.6641	19.5525	20.9908	-8.52356	-3.09146	0.0132279	0.150986
FDXR	32.7916	11.0434	9.16356	29.7882	43.9932	159.53	-4.56599	-2.19093	0.013118	0.150986
ARHGAP6	2.98106	95.2496	106.036	0	0	0	257.523	8.00855	0.0132549	0.150986
SLC9A9	5.96211	0	0	5.41603	19.5525	25.189	-10.7963	-3.43247	0.0132957	0.151284
CTC-503J8.6	5.96211	2.76086	0	8.12405	9.77627	50.3779	-8.31503	-3.05572	0.0133098	0.151284
PTP4A1	116.261	466.585	704.285	111.029	117.315	54.5761	4.54918	2.18561	0.0133678	0.151617
KIAA1217	47.6969	66.2606	35.3452	10.8321	19.5525	0	4.95363	2.30849	0.0133604	0.151617
SRPK2	29.8106	231.912	246.107	43.3283	53.7695	8.39632	4.80975	2.26596	0.013389	0.151694
MT-ND5	760.17	37.2716	26.1816	2128.5	2111.67	667.508	-5.97341	-2.57856	0.0134124	0.151796
MLTK	38.7537	49.6954	108.654	21.6641	14.6644	4.19816	4.63108	2.21135	0.0134579	0.152147
EXOC4	20.8674	380.998	323.343	56.8683	68.4339	41.9816	4.34154	2.11821	0.0134968	0.152425
EEF1A1P6	32.7916	211.206	229.089	40.6202	48.8813	16.7926	4.46043	2.15718	0.0135245	0.152499
EIF2S3L	0	103.532	106.036	0	0	0	263.44	8.04133	0.0135323	0.152499
BSCL2	5.96211	0	2.61816	5.41603	4.88813	71.3687	-9.65942	-3.27194	0.0135679	0.152602
WIPI1	50.678	35.8911	34.0361	154.357	122.203	96.5577	-3.3901	-1.76133	0.0135704	0.152602
ZNF343	8.94317	0	0	13.5401	29.3288	16.7926	-9.67177	-3.27378	0.0135873	0.152629
FMR1	14.9053	153.228	140.072	27.0802	34.2169	8.39632	4.42937	2.1471	0.0136328	0.152977
PTGS2	318.973	465.204	865.302	181.437	102.651	0	5.7674	2.52792	0.013738	0.153995
SGMS1	17.8863	149.086	134.835	18.9561	43.9932	0	4.84891	2.27766	0.0138518	0.155105
UBE2H	131.167	59.3584	73.3085	289.758	439.932	239.295	-3.76783	-1.91374	0.0139003	0.155477
UBA1	378.594	1461.87	1707.04	276.218	229.742	281.277	4.50569	2.17175	0.0139145	0.155477
U2SURP	41.7348	274.705	265.743	35.2042	78.2101	20.9908	4.39479	2.1358	0.0139938	0.156198
FKBP10	86.4507	24.8477	24.8725	181.437	92.8745	205.71	-3.70008	-1.88756	0.0140427	0.156577
MKLN1	17.8863	196.021	209.453	43.3283	29.3288	25.189	4.28733	2.10008	0.0140592	0.156596
RP11-498C9.2	14.9053	0	0	32.4962	19.5525	41.9816	-7.63148	-2.93196	0.0140767	0.156626
IL1RAP	5.96211	22.0869	37.9633	2.70802	0	0	15.9538	3.99583	0.0140936	0.156627
KIF3A	5.96211	117.336	154.472	10.8321	39.1051	4.19816	5.23569	2.38838	0.0141065	0.156627
KLF5	53.659	5.52171	19.6362	0	4.88813	0	16.3325	4.02967	0.0141256	0.156674
TSR1	89.4317	71.7823	83.7812	24.3721	24.4407	8.39632	4.02661	2.00956	0.0141454	0.156728
MPP1	26.8295	318.879	261.816	46.0363	19.5525	71.3687	4.41515	2.14246	0.0141879	0.157035
IPO9	77.5075	469.346	552.432	75.8245	122.203	58.7742	4.30718	2.10674	0.0142741	0.157041
FAM181B	2.98106	114.576	75.9267	0	0	0	244.049	7.93103	0.014224	0.157041
BCL7A	2.98106	1.38043	5.23632	18.9561	29.3288	20.9908	-6.26449	-2.6472	0.0142737	0.157041
TJP1	95.3938	873.811	625.74	154.357	127.091	29.3871	5.11136	2.35371	0.0142304	0.157041
TRIM16	56.6401	34.5107	37.9633	146.233	146.644	109.152	-3.36048	-1.74867	0.0142778	0.157041
SLC4A11	2.98106	2.76086	0	5.41603	24.4407	25.189	-8.75165	-3.12956	0.0142537	0.157041
HNRNPLL	26.8295	158.749	145.308	48.7443	19.5525	4.19816	4.40077	2.13776	0.0143195	0.157171
ABCC4	47.6969	241.575	238.253	40.6202	63.5457	16.7926	4.40349	2.13865	0.0143171	0.157171
RP11-322E11.5	5.96211	0	0	8.12405	9.77627	29.3871	-10.5339	-3.39697	0.0143455	0.157293
IER5	640.927	48.315	69.3813	51.4523	53.7695	58.7742	4.58781	2.19781	0.0143647	0.157341
PTEN	41.7348	488.672	455.56	73.1164	92.8745	58.7742	4.39751	2.13669	0.0144206	0.157788
ZFR	98.3749	491.433	509.232	102.905	122.203	20.9908	4.46431	2.15844	0.014498	0.158115
KDM7A	14.9053	73.1627	130.908	10.8321	29.3288	4.19816	5.09853	2.35008	0.0145403	0.158115
VPS37A	38.7537	179.456	167.562	48.7443	29.3288	16.7926	3.98455	1.99442	0.0145247	0.158115
PDPK2	47.6969	6.90214	19.6362	2.70802	0	0	16.5018	4.04455	0.0145031	0.158115
TGM2	116.261	56.5976	65.454	192.269	219.966	398.825	-3.47986	-1.79903	0.0145293	0.158115
DDX3X	348.784	909.702	1027.63	178.729	268.847	46.1798	4.63961	2.214	0.0144665	0.158115
ITSN2	65.5833	310.596	371.779	67.7004	92.8745	29.3871	3.95721	1.98449	0.0146609	0.158232
SP140L	20.8674	4.14129	6.5454	29.7882	58.6576	41.9816	-4.76104	-2.25128	0.0145739	0.158232
SLC22A23	0	46.9346	48.436	2.70802	4.88813	4.19816	8.0345	3.00621	0.0146402	0.158232
DLD	38.7537	218.108	233.016	54.1603	43.9932	0	4.9302	2.30165	0.0146043	0.158232
RAB14	83.4696	488.672	469.96	108.321	58.6576	83.9632	4.12744	2.04525	0.0146435	0.158232
MBP	8.94317	0	0	21.6641	24.4407	8.39632	-9.66672	-3.27303	0.0146711	0.158232
ZNF71	5.96211	0	0	13.5401	14.6644	12.5945	-9.94219	-3.31356	0.0145936	0.158232
TCF20	32.7916	126.999	142.69	35.2042	24.4407	16.7926	3.89885	1.96305	0.0146265	0.158232
AMIGO3	5.96211	4.14129	1.30908	67.7004	0	16.7926	-7.63118	-2.93191	0.0147186	0.158454
PPM1F	134.148	57.978	77.2358	259.97	254.183	411.42	-3.54075	-1.82405	0.0147218	0.158454
ATL2	11.9242	113.195	172.799	37.9122	19.5525	4.19816	4.69696	2.23173	0.0147934	0.159063
ABHD17C	5.96211	56.5976	89.0175	5.41603	19.5525	4.19816	5.4387	2.44326	0.0148258	0.159249
ANAPC4	8.94317	190.499	134.835	21.6641	39.1051	12.5945	4.59923	2.20139	0.0148639	0.159495
MZT2A	23.8485	1.38043	0	29.7882	34.2169	79.7651	-6.21045	-2.6347	0.0148955	0.15951
UGGT2	11.9242	1.38043	0	21.6641	14.6644	33.5853	-7.79511	-2.96257	0.0148906	0.15951
UBA7	2.98106	5.52171	1.30908	16.2481	24.4407	25.189	-5.92056	-2.56573	0.0149155	0.159563
NFKB2	41.7348	74.5431	57.5995	18.9561	4.88813	12.5945	4.44207	2.15123	0.0150158	0.160331
NUP93	44.7159	121.478	120.435	13.5401	4.88813	50.3779	4.20255	2.07127	0.0150177	0.160331
SLC44A1	77.5075	26.2281	19.6362	116.445	205.302	113.35	-3.68716	-1.88251	0.0150488	0.1605
RILP	0	4.14129	2.61816	16.2481	4.88813	41.9816	-7.2418	-2.85635	0.01512	0.161097
VEGFB	41.7348	46.9346	51.0541	108.321	83.0983	344.249	-3.78731	-1.92117	0.0151579	0.161338
SLC6A15	5.96211	0	0	10.8321	19.5525	12.5945	-9.9442	-3.31386	0.0151741	0.161348
MOB2	14.9053	12.4239	24.8725	48.7443	39.1051	130.143	-4.02675	-2.00962	0.015211	0.161577
PPP1R2	14.9053	103.532	126.981	16.2481	24.4407	16.7926	4.35226	2.12176	0.0152333	0.161651
PLVAP	5.96211	0	5.23632	16.2481	29.3288	33.5853	-6.95275	-2.79758	0.0152542	0.16171
SIPA1L3	38.7537	222.249	318.107	46.0363	73.322	12.5945	4.41266	2.14165	0.01529	0.161926
SAMD9	8.94317	5.52171	1.30908	21.6641	58.6576	12.5945	-6.1183	-2.61313	0.0153127	0.162005
ADAMTS7	101.356	0	2.61816	167.897	215.078	235.097	-6.01643	-2.58891	0.0153303	0.162029
SFMBT1	2.98106	26.2281	37.9633	0	4.88813	0	15.0773	3.91431	0.0153467	0.162039
BZW1	301.087	790.986	794.612	219.349	146.644	75.5669	4.24032	2.08417	0.0154083	0.16204
MLLT4	80.4885	516.28	566.832	92.0726	136.868	29.3871	4.51618	2.1751	0.0154015	0.16204
ENTPD4	38.7537	13.8043	9.16356	70.4084	122.203	41.9816	-4.06356	-2.02274	0.0153666	0.16204
RPL7P6	0	88.3474	99.4901	0	0	0	236.395	7.88505	0.015386	0.16204
CCT4	339.841	733.008	977.883	167.897	131.98	197.314	4.12564	2.04462	0.015445	0.162196
RNASE4	5.96211	0	0	43.3283	4.88813	4.19816	-10.7023	-3.41984	0.0154538	0.162196
C16orf52	38.7537	67.641	48.436	13.5401	4.88813	16.7926	4.30874	2.10727	0.0154897	0.162218
LPIN3	0	86.967	99.4901	0	0	0	234.677	7.87453	0.015502	0.162218
PLXNB3	41.7348	0	1.30908	100.197	68.4339	71.3687	-5.82635	-2.54259	0.0154908	0.162218
THEM4	8.94317	0	1.30908	16.2481	19.5525	20.9908	-7.53667	-2.91393	0.0156178	0.162964
PMF1	11.9242	1.38043	2.61816	18.9561	14.6644	54.5761	-6.46614	-2.69291	0.0156197	0.162964
CDC27	71.5454	230.532	281.452	40.6202	83.0983	25.189	3.99754	1.99911	0.0155933	0.162964
ZFC3H1	32.7916	291.27	357.379	59.5764	83.0983	4.19816	4.63824	2.21358	0.0157148	0.163795
ZMAT3	98.3749	13.8043	10.4726	143.525	224.854	117.548	-4.08501	-2.03034	0.0157508	0.164008
AC083899.3	8.94317	77.304	83.7812	0	0	0	215.963	7.75464	0.0157808	0.164157
TSHZ3	0	45.5541	24.8725	2.70802	0	0	17.291	4.11195	0.0158665	0.164887
NHEJ1	8.94317	1.38043	0	18.9561	14.6644	20.9908	-7.53499	-2.91361	0.0159282	0.165364
S100A4	0	117.336	65.454	0	0	0	230.054	7.84583	0.0160621	0.165545
IFRG15	0	66.2606	117.817	0	0	0	231.699	7.85611	0.0159924	0.165545
CEP170P1	0	81.4453	100.799	0	0	0	229.434	7.84194	0.0160474	0.165545
VPS52	29.8106	103.532	82.4721	24.3721	14.6644	8.39632	4.37926	2.13069	0.0160322	0.165545
NPR2	35.7727	86.967	81.163	24.3721	0	16.7926	4.49822	2.16935	0.0160587	0.165545
MTG1	20.8674	5.52171	5.23632	48.7443	19.5525	54.5761	-4.7237	-2.23992	0.0159998	0.165545
TTC9	0	82.8257	99.4901	0	0	0	229.523	7.8425	0.0160559	0.165545
SEC23B	56.6401	175.314	239.562	59.5764	19.5525	33.5853	4.06668	2.02385	0.0160711	0.165545
NCKAP1	160.977	1318.31	1425.59	216.641	322.617	50.3779	4.92962	2.30148	0.0161147	0.165832
C1orf86	20.8674	0	0	29.7882	19.5525	88.1614	-7.07551	-2.82283	0.0161701	0.166078
RNF5	20.8674	15.1847	7.85448	37.9122	53.7695	71.3687	-3.86876	-1.95187	0.0161642	0.166078
MED12	23.8485	302.314	272.289	59.5764	48.8813	33.5853	4.1966	2.06922	0.0162357	0.16659
PRDX1	1290.8	2766.38	4203.46	620.136	567.023	961.379	3.84757	1.94395	0.0164672	0.166624
PPAP2B	65.5833	118.717	138.763	40.6202	24.4407	25.189	3.5045	1.80921	0.0164124	0.166624
RAB13	92.4128	33.1303	27.4907	151.649	112.427	323.258	-3.95632	-1.98416	0.0164971	0.166624
TDRD10	5.96211	0	0	8.12405	14.6644	20.9908	-9.94539	-3.31403	0.0163466	0.166624
RFWD2	41.7348	273.325	306.325	59.5764	34.2169	58.7742	4.05123	2.01836	0.016555	0.166624
FILIP1L	56.6401	276.086	311.561	56.8683	87.9864	16.7926	4.01019	2.00367	0.0165462	0.166624
MAPK9	41.7348	196.021	256.58	59.5764	34.2169	20.9908	4.23349	2.08185	0.0165203	0.166624
PRICKLE4	5.96211	0	0	8.12405	24.4407	12.5945	-9.94621	-3.31415	0.0162943	0.166624
CUL9	23.8485	6.90214	3.92724	35.2042	48.8813	46.1798	-4.64484	-2.21563	0.0164802	0.166624
NAMPTL	8.94317	135.282	172.799	13.5401	48.8813	0	5.14444	2.36301	0.0164199	0.166624
DDX50	23.8485	187.738	270.98	35.2042	29.3288	46.1798	4.36162	2.12486	0.0164405	0.166624
SHOC2	29.8106	150.467	124.363	21.6641	48.8813	4.19816	4.16545	2.05847	0.0165464	0.166624
RP11-818F20.5	5.96211	0	0	10.8321	24.4407	8.39632	-9.94461	-3.31392	0.0163914	0.166624
RSRC2	113.28	151.847	142.69	43.3283	53.7695	29.3871	3.34484	1.74194	0.0163492	0.166624
MFAP1	23.8485	186.358	180.653	21.6641	43.9932	33.5853	4.02079	2.00748	0.0163553	0.166624
CGNL1	29.8106	779.942	756.649	86.6565	151.532	62.9724	5.21112	2.38159	0.016287	0.166624
LARGE	2.98106	51.0759	117.817	0	0	0	217.139	7.76247	0.0165094	0.166624
PHKA1	5.96211	55.2171	60.2177	10.8321	4.88813	4.19816	5.71239	2.51409	0.016544	0.166624
MTM1	14.9053	71.7823	77.2358	16.2481	14.6644	0	5.13271	2.35972	0.0165005	0.166624
VBP1	32.7916	49.6954	64.1449	18.9561	9.77627	0	4.60076	2.20187	0.016384	0.166624
POTEKP	0	100.771	74.6176	0	0	0	220.879	7.78711	0.016598	0.166739
RPL32P3	5.96211	0	0	10.8321	24.4407	8.39632	-9.94461	-3.31392	0.0165909	0.166739
AC009120.6	0	31.7499	36.6543	2.70802	0	0	16.7766	4.06838	0.0166561	0.167163
SLC35E2B	41.7348	1.38043	1.30908	75.8245	97.7627	41.9816	-5.11231	-2.35397	0.0167036	0.167481
PRKCG	2.98106	103.532	62.8359	0	0	0	214.027	7.74165	0.0167294	0.16758
ADAMTS4	89.4317	133.902	90.3266	40.6202	19.5525	25.189	3.46906	1.79454	0.0167514	0.167641
FAM189A2	8.94317	31.7499	19.6362	2.70802	0	0	14.6905	3.87681	0.0168705	0.168514
ZNF302	8.94317	0	1.30908	21.6641	19.5525	12.5945	-7.53425	-2.91346	0.0168637	0.168514
PTPN12	104.337	596.345	740.94	108.321	161.308	29.3871	4.83016	2.27207	0.0169726	0.169373
PPIG	41.7348	227.771	178.035	46.0363	34.2169	33.5853	3.91186	1.96785	0.0169987	0.169436
MON1B	68.5643	12.4239	11.7817	146.233	102.651	88.1614	-3.86245	-1.94951	0.0170111	0.169436
PPP2CB	235.504	313.357	434.615	111.029	83.0983	75.5669	3.60612	1.85045	0.0171143	0.170304
HIST3H2A	5.96211	33.1303	28.7998	2.70802	4.88813	0	8.92261	3.15747	0.0171874	0.170388
PTCHD3P1	17.8863	0	2.61816	24.3721	53.7695	29.3871	-6.08662	-2.60564	0.0171634	0.170388
MYEF2	5.96211	172.554	111.272	16.2481	39.1051	8.39632	4.60882	2.2044	0.0171669	0.170388
KRBOX4	8.94317	0	0	16.2481	24.4407	12.5945	-9.0338	-3.17533	0.0171767	0.170388
ZNF767	5.96211	1.38043	0	16.2481	14.6644	12.5945	-7.763	-2.95661	0.0173172	0.170393
REPIN1	59.6211	6.90214	2.61816	119.153	87.9864	92.3595	-4.55147	-2.18633	0.0173109	0.170393
MSANTD2	5.96211	100.771	90.3266	18.9561	14.6644	4.19816	5.08262	2.34557	0.0172951	0.170393
AHSA1	333.878	321.64	511.85	127.277	68.4339	104.954	3.79074	1.92248	0.0172906	0.170393
PDE4A	8.94317	0	0	18.9561	9.77627	20.9908	-9.03123	-3.17492	0.0172246	0.170393
ADAMTS5	0	149.086	26.1816	0	0	0	220.472	7.78445	0.0172609	0.170393
CHCHD10	20.8674	0	0	37.9122	9.77627	92.3595	-7.12728	-2.83335	0.0172938	0.170393
ARMCX6	29.8106	0	0	62.2844	43.9932	54.5761	-5.70957	-2.51338	0.0173149	0.170393
RAB7L1	23.8485	15.1847	2.61816	83.9485	53.7695	33.5853	-4.4682	-2.15969	0.0173742	0.170477
ATXN2	26.8295	240.195	324.652	59.5764	58.6576	20.9908	4.23838	2.08351	0.0173533	0.170477
EXOC3L1	20.8674	60.7389	45.8178	5.41603	4.88813	16.7926	4.98338	2.31713	0.0173719	0.170477
USP30	14.9053	51.0759	60.2177	10.8321	9.77627	4.19816	5.02585	2.32937	0.0174119	0.170605
PLEKHM1	107.318	23.4673	22.2544	222.057	234.63	134.341	-4.00709	-2.00256	0.0174195	0.170605
RAP1GDS1	80.4885	144.945	146.617	43.3283	43.9932	25.189	3.35291	1.74541	0.0174457	0.170703
TMEFF1	0	0	2.61816	21.6641	9.77627	4.19816	-9.74284	-3.28434	0.017495	0.171027
GPRIN1	11.9242	0	0	13.5401	24.4407	29.3871	-7.47644	-2.90235	0.0175206	0.171118
IDE	26.8295	211.206	170.18	48.7443	29.3288	25.189	3.90393	1.96493	0.0175517	0.171263
RP11-867G23.4	2.98106	0	0	0	0	54.5761	-17.1793	-4.1026	0.017568	0.171264
FUCA1	0	96.63	81.163	10.8321	0	16.7926	6.21524	2.63581	0.0176389	0.171452
FAM46C	190.788	2.76086	0	0	0	0	241.018	7.913	0.0176158	0.171452
CHMP2B	20.8674	74.5431	78.5448	16.2481	4.88813	16.7926	4.44631	2.15261	0.0176418	0.171452
MARCH5	32.7916	209.825	238.253	56.8683	39.1051	16.7926	4.21129	2.07426	0.0176523	0.171452
MCM6	14.9053	40.0324	24.8725	2.70802	0	8.39632	7.17878	2.84374	0.0177312	0.171586
PHLDB2	38.7537	200.162	218.616	21.6641	78.2101	4.19816	4.47747	2.16268	0.0176968	0.171586
TAPBP	104.337	12.4239	10.4726	108.321	166.197	226.701	-4.0478	-2.01714	0.0177067	0.171586
SIVA1	11.9242	0	0	13.5401	9.77627	67.1706	-8.54757	-3.09551	0.0177242	0.171586
ACTG2	0	84.2061	79.8539	0	0	0	206.802	7.69211	0.0177803	0.171681
DNAJA1	1022.5	742.671	1574.82	308.714	273.735	243.493	4.03076	2.01105	0.0177851	0.171681
USP15	50.678	213.966	213.38	43.3283	58.6576	16.7926	4.05555	2.0199	0.0177899	0.171681
BIRC6	65.5833	684.693	670.249	108.321	151.532	4.19816	5.37556	2.42642	0.0178741	0.171865
RAB18	83.4696	248.477	251.343	67.7004	63.5457	25.189	3.71518	1.89343	0.0178263	0.171865
C20orf194	32.7916	167.032	205.526	37.9122	53.7695	12.5945	3.91626	1.96948	0.0178535	0.171865
TPX2	35.7727	28.989	23.5634	8.12405	0	0	7.13907	2.83574	0.0178602	0.171865
NFATC1	29.8106	9.663	9.16356	46.0363	48.8813	62.9724	-3.86112	-1.94902	0.0179032	0.171989
CAMK1	26.8295	121.478	132.217	24.3721	14.6644	33.5853	3.8629	1.94968	0.0179483	0.172108
SLC25A29	41.7348	0	0	56.8683	58.6576	125.945	-5.95356	-2.57375	0.0179442	0.172108
THOC1	20.8674	107.673	130.908	16.2481	14.6644	33.5853	4.07701	2.02751	0.0179676	0.172137
FHL3	26.8295	5.52171	11.7817	24.3721	58.6576	88.1614	-4.08583	-2.03063	0.0180792	0.172735
PRPF39	14.9053	153.228	196.362	21.6641	53.7695	8.39632	4.41459	2.14228	0.0180632	0.172735
CD93	366.67	51.0759	32.727	747.412	1002.07	373.636	-4.74724	-2.24709	0.0180561	0.172735
DAPK3	95.3938	22.0869	18.3271	132.693	117.315	226.701	-3.6472	-1.86679	0.0180994	0.172772
RBM15	11.9242	45.5541	92.9447	16.2481	4.88813	8.39632	4.80554	2.2647	0.0181892	0.172813
SPATA5	5.96211	33.1303	44.5087	8.12405	0	0	7.90546	2.98285	0.0181963	0.172813
PNRC1	83.4696	95.2496	140.072	46.0363	24.4407	12.5945	3.59483	1.84592	0.0182119	0.172813
SEMA3C	5.96211	73.1627	74.6176	0	0	0	195.305	7.60959	0.018171	0.172813
AMIGO2	5.96211	15.1847	10.4726	43.3283	48.8813	46.1798	-3.8838	-1.95747	0.0181297	0.172813
GCN1L1	104.337	716.442	704.285	129.985	146.644	54.5761	4.60511	2.20324	0.0181725	0.172813
STXBP2	41.7348	2.76086	1.30908	64.9924	48.8813	96.5577	-4.88221	-2.28753	0.0182184	0.172813
WASH4P	2.98106	0	1.30908	35.2042	0	8.39632	-10.6825	-3.41718	0.0182547	0.173001
ZBED3	5.96211	0	1.30908	24.3721	34.2169	0	-8.93103	-3.15883	0.0182869	0.173151
LOXL3	0	31.7499	34.0361	2.70802	0	0	16.1408	4.01264	0.0184995	0.175007
JTB	80.4885	4.14129	2.61816	113.737	58.6576	243.493	-4.88219	-2.28753	0.0185819	0.17503
NR3C1	41.7348	109.054	150.544	37.9122	34.2169	4.19816	3.89112	1.96019	0.0185849	0.17503
NAPRT1	11.9242	1.38043	0	10.8321	29.3288	37.7834	-7.12158	-2.8322	0.0185689	0.17503
C11orf95	26.8295	11.0434	9.16356	54.1603	39.1051	54.5761	-3.76813	-1.91385	0.0185522	0.17503
DYNLL2	149.053	205.684	206.835	51.4523	78.2101	41.9816	3.50777	1.81055	0.0185727	0.17503
SH3BP5L	23.8485	11.0434	7.85448	70.4084	14.6644	83.9632	-4.28363	-2.09883	0.0187892	0.175225
USP34	50.678	753.714	748.794	129.985	146.644	41.9816	4.87118	2.28427	0.0187123	0.175225
ITGA4	5.96211	23.4673	27.4907	2.70802	0	0	14.1757	3.82535	0.018763	0.175225
MTERFD2	20.8674	4.14129	2.61816	27.0802	43.9932	41.9816	-5.00637	-2.32377	0.0186406	0.175225
RORB	0	57.978	99.4901	0	0	0	198.59	7.63365	0.018871	0.175225
DHX32	26.8295	26.2281	26.1816	73.1164	146.644	71.3687	-3.51223	-1.81239	0.0186585	0.175225
PPP1CC	74.5264	451.4	481.742	89.3645	127.091	29.3871	4.11062	2.03936	0.018842	0.175225
DGKZP1	0	28.989	37.9633	0	4.88813	0	14.2986	3.8378	0.018696	0.175225
RAB15	29.8106	0	0	37.9122	58.6576	71.3687	-5.92618	-2.5671	0.0188714	0.175225
MEF2A	56.6401	659.845	746.176	100.197	127.091	83.9632	4.7065	2.23466	0.0187255	0.175225
VPS9D1	8.94317	6.90214	5.23632	21.6641	29.3288	50.3779	-4.69989	-2.23263	0.0187513	0.175225
KANSL1	26.8295	194.64	257.889	48.7443	48.8813	12.5945	4.33155	2.11488	0.0188046	0.175225
CUEDC1	32.7916	12.4239	2.61816	64.9924	39.1051	83.9632	-4.29351	-2.10216	0.0188559	0.175225
ZNF133	5.96211	0	0	16.2481	0	37.7834	-10.607	-3.40695	0.018664	0.175225
PCBP3	0	69.0214	87.7084	0	0	0	197.688	7.62708	0.0188529	0.175225
PACSIN2	68.5643	191.88	225.162	59.5764	34.2169	33.5853	3.74614	1.90541	0.0188113	0.175225
HSP90AB1	4110.88	3118.39	4245.35	1245.69	855.423	1003.36	3.67159	1.8764	0.0189436	0.175741
NR6A1	2.98106	28.989	28.7998	0	0	4.19816	14.09	3.8166	0.0189874	0.175993
TRAPPC8	23.8485	132.521	167.562	35.2042	39.1051	0	4.32981	2.1143	0.0190133	0.176077
ATAD2	11.9242	59.3584	74.6176	0	0	0	186.727	7.54479	0.0190466	0.176231
RRP1B	14.9053	9.663	7.85448	43.3283	63.5457	20.9908	-4.14528	-2.05147	0.0190863	0.176444
KIAA0226	11.9242	140.804	168.871	29.7882	24.4407	25.189	4.03859	2.01385	0.0191828	0.17718
SOX13	23.8485	247.097	153.162	35.2042	34.2169	37.7834	3.96794	1.98839	0.0192365	0.177293
SSBP2	2.98106	1.38043	2.61816	18.9561	9.77627	16.7926	-6.54664	-2.71075	0.0192474	0.177293
OAF	98.3749	31.7499	23.5634	162.481	102.651	319.06	-3.91487	-1.96896	0.0192382	0.177293
EIF1AY	20.8674	103.532	86.3993	18.9561	14.6644	16.7926	4.17573	2.06203	0.0192622	0.177293
DMTF1	44.7159	128.38	179.344	43.3283	29.3288	25.189	3.56211	1.83273	0.0192879	0.177375
DOPEY1	5.96211	109.054	99.4901	18.9561	19.5525	4.19816	4.96599	2.31208	0.0193793	0.177447
KBTBD2	38.7537	157.369	206.835	48.7443	39.1051	20.9908	3.67655	1.87835	0.0193967	0.177447
TES	38.7537	213.966	340.361	97.4886	24.4407	4.19816	4.59832	2.20111	0.0193542	0.177447
BTAF1	38.7537	209.825	361.306	75.8245	58.6576	4.19816	4.36001	2.12433	0.0193665	0.177447
SMNDC1	11.9242	57.978	92.9447	10.8321	19.5525	4.19816	4.8274	2.27125	0.0193959	0.177447
MTRNR2L10	0	23.4673	134.835	0	0	0	199.438	7.63979	0.0193186	0.177447
IFT27	5.96211	5.52171	6.5454	27.0802	9.77627	58.7742	-5.12174	-2.35663	0.0194221	0.177526
RP11-315J22.5	0	81.4453	70.6903	0	0	0	191.963	7.58469	0.0195363	0.178414
HNRNPH1	426.291	973.202	887.557	157.065	288.4	125.945	4.0427	2.01532	0.019591	0.17857
PTER	14.9053	56.5976	69.3813	0	0	0	181.302	7.50225	0.019618	0.17857
SMARCC2	38.7537	298.173	322.034	51.4523	97.7627	8.39632	4.20301	2.07142	0.0195981	0.17857
RGCC	29.8106	0	0	10.8321	39.1051	138.539	-6.50275	-2.70105	0.019621	0.17857
APBB1IP	0	67.641	83.7812	0	0	0	191.087	7.57809	0.0196622	0.17879
AC092171.4	14.9053	4.14129	5.23632	32.4962	24.4407	37.7834	-4.6947	-2.23103	0.0197299	0.17913
ASNS	0	266.423	468.651	100.197	14.6644	4.19816	6.08204	2.60456	0.0197335	0.17913
KIAA0141	41.7348	17.9456	26.1816	86.6565	78.2101	104.954	-3.45583	-1.78903	0.019753	0.179153
TRAPPC11	14.9053	118.717	120.435	21.6641	34.2169	4.19816	4.26662	2.09309	0.0197804	0.179247
SYBU	14.9053	1.38043	1.30908	24.3721	29.3288	25.189	-6.32112	-2.66018	0.0198214	0.179465
RAPGEF6	2.98106	51.0759	48.436	2.70802	14.6644	0	6.25916	2.64597	0.0198712	0.179648
PTOV1-AS1	8.94317	0	0	16.2481	9.77627	20.9908	-8.39681	-3.06984	0.0198758	0.179648
USP21	11.9242	59.3584	73.3085	8.12405	0	20.9908	4.8962	2.29166	0.0201126	0.180363
DHX57	17.8863	67.641	51.0541	13.5401	0	12.5945	4.83391	2.27319	0.0201169	0.180363
ARHGEF3	53.659	8.28257	0	51.4523	156.42	96.5577	-5.04298	-2.33428	0.0201258	0.180363
KCNH2	0	84.2061	65.454	0	0	0	188.874	7.56128	0.0200744	0.180363
EIF4G2	1854.22	4112.3	4880.25	1196.94	1246.47	323.258	3.91971	1.97075	0.0200049	0.180363
PDE3B	0	67.641	82.4721	0	0	0	189.459	7.56574	0.0200682	0.180363
CNOT2	62.6022	176.695	171.49	48.7443	48.8813	20.9908	3.46775	1.794	0.0200726	0.180363
LRRC37A2	8.94317	0	0	18.9561	4.88813	33.5853	-8.3216	-3.05686	0.0200701	0.180363
GDPD1	0	19.326	58.9086	5.41603	0	0	11.0868	3.47078	0.0201199	0.180363
RBMX2	14.9053	2.76086	1.30908	27.0802	34.2169	20.9908	-5.84319	-2.54676	0.0200463	0.180363
EIF5AL1	5.96211	59.3584	49.7451	0	9.77627	12.5945	5.53949	2.46975	0.0201715	0.180619
ARHGEF28	74.5264	23.4673	23.5634	81.2405	205.302	121.747	-3.47392	-1.79656	0.0201946	0.180672
MAF1	56.6401	44.1737	31.4179	127.277	97.7627	176.323	-3.20142	-1.67871	0.0202306	0.180841
SETD5	92.4128	541.128	692.504	146.233	117.315	41.9816	4.32399	2.11236	0.0202739	0.180921
SRSF1	143.091	527.324	517.087	129.985	87.9864	88.1614	3.85988	1.94856	0.020265	0.180921
PSMD1	184.826	723.345	747.485	111.029	151.532	151.134	4.02811	2.0101	0.0204272	0.182135
CHIC2	38.7537	113.195	162.326	32.4962	14.6644	37.7834	3.66423	1.87351	0.0204608	0.182281
NBPF15	35.7727	0	0	54.1603	83.0983	62.9724	-5.8178	-2.54047	0.0205625	0.182929
DHX15	77.5075	477.628	544.578	116.445	117.315	33.5853	4.10752	2.03827	0.0205682	0.182929
FLNC	608.136	1130.57	2170.46	452.239	293.288	230.899	3.9916	1.99697	0.0206271	0.183142
SYNE2	5.96211	1.38043	2.61816	21.6641	24.4407	8.39632	-6.17444	-2.62631	0.0206153	0.183142
CIRH1A	56.6401	114.576	151.853	40.6202	29.3288	25.189	3.36607	1.75106	0.0206443	0.183142
PCDHGC3	14.9053	342.346	379.633	21.6641	63.5457	88.1614	4.28011	2.09765	0.0206741	0.183252
ATP13A3	256.371	407.226	659.777	184.145	102.651	33.5853	4.07945	2.02838	0.0207035	0.183352
BRIX1	11.9242	66.2606	85.0902	16.2481	9.77627	8.39632	4.60868	2.20435	0.0207648	0.183352
TRIM38	20.8674	0	0	56.8683	24.4407	37.7834	-6.30512	-2.65652	0.0207386	0.183352
ZDHHC14	41.7348	0	0	94.7806	63.5457	67.1706	-5.58309	-2.48106	0.0207316	0.183352
ITFG3_1	71.5454	2.76086	2.61816	75.8245	83.0983	193.115	-4.70472	-2.23411	0.020807	0.183352
NFAT5	71.5454	592.204	806.394	124.569	156.42	25.189	4.80038	2.26315	0.0207758	0.183352
MT-CYB	1705.16	113.195	79.8539	2986.94	3050.19	2871.54	-4.69978	-2.23259	0.0208045	0.183352
PICALM	271.276	905.561	1446.53	208.517	337.281	41.9816	4.46907	2.15997	0.0209677	0.184431
SLC38A1	98.3749	1.38043	0	427.867	210.19	16.7926	-6.61613	-2.72599	0.0209994	0.184431
TLE3	62.6022	128.38	140.072	43.3283	24.4407	29.3871	3.3418	1.74062	0.0209679	0.184431
SNN	26.8295	15.1847	5.23632	40.6202	63.5457	58.7742	-3.79271	-1.92323	0.0209934	0.184431
DFFA	38.7537	0	2.61816	73.1164	83.0983	46.1798	-5.14913	-2.36433	0.0211658	0.185121
ADCK3	8.94317	0	0	13.5401	9.77627	29.3871	-8.46303	-3.08118	0.0211096	0.185121
LMO1	0	81.4453	62.8359	0	0	0	182.184	7.50925	0.0211312	0.185121
NEDD1	14.9053	38.652	30.1089	5.41603	9.77627	0	5.9335	2.56888	0.0211474	0.185121
SF3B3	110.299	465.204	490.905	92.0726	117.315	75.5669	3.76523	1.91274	0.0211487	0.185121
TANGO2	29.8106	4.14129	1.30908	54.1603	43.9932	46.1798	-4.60938	-2.20457	0.0212285	0.185517
PPP1R9B	29.8106	349.248	299.779	37.9122	63.5457	75.5669	3.8668	1.95114	0.0213637	0.186544
IPO7	146.072	1123.67	1459.62	230.181	288.4	104.954	4.37974	2.13085	0.0214846	0.187444
FHL2	110.299	6.90214	10.4726	119.153	161.308	226.701	-4.06667	-2.02385	0.0216527	0.187564
SLC25A36	23.8485	78.6844	47.1269	16.2481	14.6644	4.19816	4.18482	2.06516	0.021602	0.187564
KIF2A	20.8674	111.815	189.817	32.4962	39.1051	12.5945	3.84366	1.94248	0.0215447	0.187564
DAGLB	20.8674	0	1.30908	35.2042	29.3288	46.1798	-5.72185	-2.51648	0.0216584	0.187564
HMBOX1	23.8485	46.9346	48.436	16.2481	4.88813	4.19816	4.30527	2.1061	0.0216136	0.187564
FAM89B	62.6022	17.9456	1.30908	78.5325	34.2169	251.89	-4.5385	-2.18222	0.0215618	0.187564
PABPC3	0	57.978	83.7812	0	0	0	179.064	7.48433	0.0215764	0.187564
FTLP5	0	48.315	94.2538	0	0	0	180.044	7.4922	0.0215429	0.187564
BCOR	44.7159	74.5431	53.6723	18.9561	19.5525	4.19816	4.00235	2.00085	0.0216306	0.187564
AC125232.1	8.94317	27.6086	24.8725	0	9.77627	0	8.53155	3.09281	0.0218008	0.188029
PRPF40A	59.6211	349.248	335.125	56.8683	97.7627	54.5761	3.5964	1.84655	0.0217447	0.188029
ERAP2	80.4885	0	0	119.153	166.197	155.332	-5.53538	-2.46868	0.0217676	0.188029
RP11-69M1.3	0	51.0759	90.3266	0	0	0	178.604	7.48062	0.0217645	0.188029
SETDB2	5.96211	0	1.30908	16.2481	9.77627	12.5945	-7.12699	-2.83329	0.021819	0.188029
ZNF213	8.94317	2.76086	0	27.0802	9.77627	16.7926	-6.576	-2.71721	0.0218073	0.188029
CTSS	8.94317	0	0	8.12405	24.4407	20.9908	-8.11084	-3.01985	0.0220354	0.188035
SLC25A12	14.9053	88.3474	98.181	16.2481	19.5525	12.5945	4.21942	2.07704	0.0219458	0.188035
SNX4	14.9053	73.1627	81.163	16.2481	19.5525	0	4.68784	2.22892	0.0219713	0.188035
TNK2	26.8295	284.368	198.98	24.3721	24.4407	71.3687	4.26995	2.09422	0.0220502	0.188035
SOBP	8.94317	1.38043	0	21.6641	4.88813	25.189	-7.30902	-2.86968	0.0220276	0.188035
EGFL7	366.67	60.7389	48.436	322.254	347.057	1498.74	-4.5801	-2.19538	0.0219318	0.188035
TRIM44	41.7348	0	0	108.321	102.651	29.3871	-5.92043	-2.5657	0.0219931	0.188035
PCDH9	20.8674	107.673	102.108	29.7882	19.5525	4.19816	4.17724	2.06255	0.0218744	0.188035
MYH11	2.98106	67.641	64.1449	0	0	0	171.207	7.4196	0.0219973	0.188035
ZC3H18	65.5833	95.2496	106.036	35.2042	19.5525	25.189	3.30332	1.72392	0.0220693	0.188035
ERBB2	29.8106	41.4129	32.727	10.8321	0	8.39632	4.69298	2.2305	0.0218792	0.188035
WDR83OS	50.678	27.6086	20.9453	67.7004	73.322	180.521	-3.3463	-1.74256	0.0220521	0.188035
FAM210B	59.6211	0	1.30908	67.7004	97.7627	155.332	-5.38387	-2.42864	0.0219034	0.188035
PPARA	11.9242	0	0	32.4962	14.6644	16.7926	-7.18193	-2.84437	0.0219975	0.188035
RBM45	8.94317	75.9236	52.3632	8.12405	9.77627	12.5945	4.60314	2.20262	0.0220903	0.188062
PCDH7	0	41.4129	89.0175	10.8321	4.88813	4.19816	6.19416	2.63091	0.022165	0.188545
RBPMS	32.7916	82.8257	115.199	21.6641	14.6644	25.189	3.76769	1.91368	0.0221869	0.188579
MEST	2.98106	73.1627	56.2905	0	0	0	168.276	7.39468	0.0222729	0.189006
BRF1	11.9242	11.0434	17.018	32.4962	58.6576	67.1706	-3.55865	-1.83133	0.0222568	0.189006
UCHL5	17.8863	35.8911	43.1997	8.12405	9.77627	4.19816	4.6871	2.2287	0.0222987	0.189073
TMEM51	23.8485	2.76086	2.61816	27.0802	39.1051	58.7742	-4.91746	-2.29791	0.0223489	0.189194
RAP1B	238.485	579.78	820.793	197.685	161.308	33.5853	4.1571	2.05558	0.0223321	0.189194
SF3B1	205.693	1027.04	1206.97	222.057	273.735	83.9632	4.21127	2.07426	0.0224631	0.18965
FKBP1C	0	60.7389	75.9267	0	0	0	172.737	7.43243	0.0224746	0.18965
TSPAN14	83.4696	51.0759	32.727	173.313	234.63	151.134	-3.50435	-1.80915	0.0224643	0.18965
KLF16	17.8863	0	10.4726	43.3283	24.4407	58.7742	-4.82123	-2.2694	0.0224682	0.18965
PBX1	2.98106	67.641	58.9086	0	0	0	164.706	7.36375	0.0225375	0.190028
FXR2	122.223	294.031	399.27	67.7004	73.322	104.954	3.35302	1.74546	0.0225625	0.190088
SHPRH	5.96211	89.7279	51.0541	5.41603	24.4407	0	5.11286	2.35413	0.0226843	0.190961
NPAS2	53.659	1.38043	0	105.613	92.8745	79.7651	-5.20958	-2.38117	0.0227783	0.191294
UBE2K	83.4696	267.803	323.343	86.6565	63.5457	46.1798	3.41488	1.77183	0.0227694	0.191294
SLC45A4	38.7537	26.2281	34.0361	5.41603	9.77627	4.19816	4.99754	2.32122	0.0227623	0.191294
GTPBP4	44.7159	118.717	141.381	40.6202	29.3288	16.7926	3.46101	1.79119	0.0228289	0.191567
WDFY3	44.7159	354.77	357.379	83.9485	92.8745	16.7926	3.90514	1.96538	0.0228608	0.191682
SH3TC1	107.318	28.989	17.018	162.481	166.197	222.503	-3.72691	-1.89798	0.0228996	0.191854
PAK3	0	64.8801	69.3813	0	0	0	169.748	7.40725	0.0229259	0.191923
ZNF605	11.9242	0	0	18.9561	14.6644	20.9908	-7.53338	-2.9133	0.0229771	0.192198
ATIC	44.7159	110.434	172.799	35.2042	9.77627	46.1798	3.54602	1.8262	0.0230022	0.192256
CLOCK	20.8674	202.923	222.544	48.7443	48.8813	12.5945	4.03543	2.01272	0.0230761	0.192687
PEX3	14.9053	37.2716	30.1089	5.41603	9.77627	0	5.85712	2.55019	0.0230903	0.192687
LAMA4	441.196	74.5431	151.853	695.96	1236.7	768.263	-4.07301	-2.0261	0.0231464	0.192812
CEP164	35.7727	9.663	14.3999	73.1164	73.322	41.9816	-3.59376	-1.84549	0.0231601	0.192812
TMPO	5.96211	86.967	75.9267	13.5401	14.6644	8.39632	4.61011	2.2048	0.0231557	0.192812
PGRMC1	68.5643	140.804	226.471	46.0363	43.9932	37.7834	3.43292	1.77944	0.0231969	0.192966
PARD6G	160.977	0	0	0	0	0	200.655	7.64857	0.0232254	0.193051
FAM135A	11.9242	84.2061	112.581	13.5401	29.3288	4.19816	4.542	2.18333	0.0233486	0.193222
FAM126A	47.6969	191.88	155.781	37.9122	53.7695	25.189	3.4432	1.78375	0.0233099	0.193222
ANKRD46	11.9242	59.3584	48.436	0	0	0	154.732	7.27363	0.0232794	0.193222
BNC2	5.96211	1.38043	1.30908	24.3721	9.77627	8.39632	-6.543	-2.70995	0.0233189	0.193222
DENND4C	32.7916	197.401	246.107	43.3283	58.6576	20.9908	3.89834	1.96286	0.0233442	0.193222
SOX18	14.9053	23.4673	2.61816	24.3721	34.2169	125.945	-4.43315	-2.14833	0.0233559	0.193222
HSD3B7	2.98106	46.9346	30.1089	5.41603	0	4.19816	7.30731	2.86934	0.0235091	0.194337
PPIP5K2	32.7916	113.195	66.7631	10.8321	39.1051	0	4.45783	2.15634	0.0235607	0.194381
SYNCRIP	157.996	396.183	469.96	102.905	131.98	58.7742	3.51219	1.81237	0.0235697	0.194381
PIK3C2A	140.11	476.248	750.103	132.693	166.197	12.5945	4.38483	2.13252	0.0235603	0.194381
PTGFRN	44.7159	0	0	56.8683	117.315	67.1706	-5.53522	-2.46864	0.0237345	0.195587
PPIL3	8.94317	46.9346	47.1269	5.41603	9.77627	8.39632	4.64714	2.21634	0.0239096	0.195752
SRGAP3	0	26.2281	103.417	0	0	0	163.846	7.3562	0.0239401	0.195752
WDR6	98.3749	73.1627	26.1816	222.057	219.966	193.115	-3.30772	-1.72584	0.0238275	0.195752
CAMK2D	8.94317	182.217	202.907	40.6202	39.1051	16.7926	4.0682	2.02439	0.0238342	0.195752
LTC4S	0	98.0104	32.727	0	0	0	165.183	7.36792	0.0237978	0.195752
OGDH	107.318	398.944	331.197	102.905	68.4339	75.5669	3.37524	1.75499	0.0239369	0.195752
MED22	32.7916	9.663	7.85448	43.3283	53.7695	62.9724	-3.69434	-1.88532	0.0238847	0.195752
ATP2A2	482.931	1544.7	1989.8	579.515	268.847	20.9908	4.60827	2.20422	0.0239196	0.195752
CLTC	548.515	3470.4	4109.2	836.777	962.962	256.088	3.95384	1.98326	0.0238605	0.195752
PDXP	8.94317	0	0	13.5401	14.6644	16.7926	-7.76259	-2.95654	0.02383	0.195752
CTPS1	71.5454	86.967	65.454	21.6641	14.6644	25.189	3.55683	1.83059	0.0241027	0.196625
DCUN1D5	68.5643	103.532	126.981	43.3283	24.4407	20.9908	3.25017	1.70052	0.0240853	0.196625
SLC9A3R1	20.8674	5.52171	5.23632	24.3721	19.5525	88.1614	-4.49991	-2.1699	0.0240926	0.196625
UNC13A	0	27.6086	32.727	0	4.88813	0	13.0107	3.70163	0.0241266	0.196667
ACOX3	5.96211	4.14129	3.92724	21.6641	19.5525	33.5853	-5.32119	-2.41175	0.0241608	0.196794
SAMD4B	92.4128	256.76	384.87	132.693	43.9932	20.9908	3.64148	1.86452	0.0241968	0.196935
RC3H1	11.9242	129.76	201.598	35.2042	39.1051	8.39632	4.13966	2.04951	0.0243654	0.197539
WASH3P	11.9242	1.38043	7.85448	10.8321	24.4407	71.3687	-5.1503	-2.36466	0.0243133	0.197539
RPGRIP1L	2.98106	38.652	36.6543	5.41603	0	4.19816	7.15752	2.83946	0.0243643	0.197539
CYBA	26.8295	0	0	35.2042	19.5525	96.5577	-5.92039	-2.56569	0.0243834	0.197539
RAB8A	77.5075	80.0649	81.163	21.6641	29.3288	20.9908	3.39401	1.76299	0.0243409	0.197539
FLRT3	14.9053	37.2716	62.8359	0	0	0	149.133	7.22046	0.0243299	0.197539
GPR125	17.8863	69.0214	66.7631	18.9561	14.6644	0	4.38288	2.13188	0.0244229	0.197594
KLHL2	29.8106	70.4019	116.508	18.9561	29.3288	8.39632	3.92485	1.97264	0.0244679	0.197594
CALD1	202.712	721.964	349.525	108.321	166.197	54.5761	3.89438	1.96139	0.0244302	0.197594
DNAJC4	29.8106	0	1.30908	35.2042	19.5525	109.152	-5.53734	-2.46919	0.0244937	0.197594
AC139100.2	86.4507	0	0	2.70802	0	0	21.8573	4.45004	0.0245026	0.197594
ADNP	68.5643	289.89	325.961	54.1603	112.427	29.3871	3.53911	1.82339	0.0244902	0.197594
ORAI2	68.5643	16.5651	14.3999	83.9485	107.539	130.143	-3.42777	-1.77727	0.0245303	0.197667
ISCU	38.7537	35.8911	30.1089	83.9485	78.2101	167.926	-3.15587	-1.65804	0.0245939	0.198028
FAM120A	181.844	626.715	625.74	151.649	127.091	75.5669	4.03606	2.01295	0.024642	0.198177
SOCS7	5.96211	23.4673	45.8178	5.41603	4.88813	0	6.80149	2.76585	0.02465	0.198177
DLL1	5.96211	27.6086	26.1816	2.70802	0	4.19816	8.12653	3.02264	0.024784	0.199102
ARID1A	53.659	321.64	339.052	102.905	63.5457	33.5853	3.5411	1.8242	0.0249049	0.199279
RBBP5	44.7159	98.0104	106.036	21.6641	39.1051	16.7926	3.40366	1.76709	0.0248736	0.199279
INO80D	8.94317	69.0214	95.5629	24.3721	9.77627	0	4.79126	2.26041	0.0248624	0.199279
OXA1L	113.28	2.76086	2.61816	143.525	146.644	251.89	-4.64035	-2.21423	0.0249193	0.199279
DLGAP1-AS2	8.94317	0	0	37.9122	0	25.189	-8.00888	-3.0016	0.0248712	0.199279
TSC22D3	50.678	91.1083	146.617	16.2481	34.2169	41.9816	3.28706	1.7168	0.0249013	0.199279
ZNF84	17.8863	0	0	27.0802	39.1051	33.5853	-6.38695	-2.67513	0.0249592	0.199447
TUBB2B	38.7537	40.0324	35.3452	0	0	0	142.656	7.15639	0.0250459	0.199686
CD109	318.973	82.8257	57.5995	517.231	1134.05	239.295	-4.14095	-2.04996	0.0250156	0.199686
GAPVD1	35.7727	276.086	282.761	73.1164	68.4339	8.39632	3.94677	1.98067	0.0250376	0.199686
DYRK2	2.98106	42.7933	61.5268	5.41603	14.6644	0	5.49944	2.45929	0.0250737	0.199756
ST13P19	0	48.315	73.3085	0	0	0	154.03	7.26707	0.0251326	0.199908
TLL1	0	38.652	19.6362	2.70802	0	0	14.3571	3.8437	0.0251734	0.199908
SH3TC2	0	70.4019	47.1269	13.5401	0	4.19816	6.01536	2.58865	0.0252444	0.199908
LOXL4	2.98106	56.5976	57.5995	0	0	0	149.432	7.22334	0.0252347	0.199908
NFATC4	32.7916	0	0	24.3721	48.8813	100.756	-5.49993	-2.45941	0.0251571	0.199908
TBC1D2B	74.5264	26.2281	27.4907	92.0726	161.308	130.143	-3.14315	-1.65221	0.0252431	0.199908
MT1G	152.034	0	0	0	0	0	189.503	7.56607	0.0252187	0.199908
MT-ND3	232.522	4.14129	0	327.67	366.61	709.489	-5.95392	-2.57384	0.0251733	0.199908
MT-ND4	3344.75	78.6844	60.2177	5589.35	7043.8	5390.44	-5.17619	-2.37189	0.0252762	0.20001
TMEM110	20.8674	1.38043	0	40.6202	24.4407	41.9816	-5.5147	-2.46328	0.0253671	0.200562
TMEM168	5.96211	60.7389	60.2177	5.41603	19.5525	0	5.32304	2.41225	0.025422	0.200562
ZCCHC7	5.96211	4.14129	5.23632	35.2042	14.6644	20.9908	-4.99496	-2.32047	0.0254039	0.200562
PSMD11	196.75	554.932	751.412	176.021	97.7627	100.756	3.98201	1.9935	0.0254172	0.200562
GAD2	0	99.3909	23.5634	0	0	0	155.418	7.28001	0.0254434	0.200581
ACTA1	2.98106	71.7823	41.8906	0	0	0	148.617	7.21546	0.0254935	0.200675
SP3	17.8863	196.021	206.835	40.6202	58.6576	4.19816	4.07211	2.02578	0.0254873	0.200675
ZMYM2	35.7727	133.902	158.399	37.9122	43.9932	12.5945	3.48877	1.80272	0.0255354	0.200706
TSPAN7	0	62.1193	57.5995	0	0	0	151.668	7.24477	0.0255254	0.200706
MIEF2	5.96211	4.14129	2.61816	27.0802	9.77627	20.9908	-5.12985	-2.35892	0.0255807	0.200913
SYT11	29.8106	9.663	6.5454	59.5764	58.6576	29.3871	-3.70216	-1.88837	0.0256701	0.201465
HEXIM1	456.102	35.8911	37.9633	32.4962	48.8813	41.9816	4.26497	2.09254	0.0257295	0.201781
PKN3	26.8295	113.195	54.9814	18.9561	9.77627	20.9908	3.87285	1.9534	0.0258099	0.20226
ILKAP	23.8485	80.0649	91.6356	16.2481	9.77627	25.189	3.85135	1.94536	0.0258406	0.202351
APOPT1	29.8106	4.14129	1.30908	24.3721	39.1051	88.1614	-4.62712	-2.21011	0.025879	0.202501
KATNBL1	8.94317	66.2606	102.108	10.8321	19.5525	12.5945	4.24312	2.08513	0.0258994	0.20251
RSBN1	8.94317	42.7933	65.454	13.5401	9.77627	0	4.77057	2.25416	0.025988	0.202623
DMXL1	5.96211	165.651	153.162	32.4962	39.1051	4.19816	4.27038	2.09436	0.0259544	0.202623
FTSJ2	11.9242	0	0	8.12405	19.5525	41.9816	-6.82105	-2.76999	0.0259906	0.202623
IMPACT	44.7159	40.0324	79.8539	21.6641	9.77627	8.39632	3.81904	1.93321	0.0259448	0.202623
GTF2IRD2B	11.9242	2.76086	1.30908	16.2481	34.2169	25.189	-5.72876	-2.51822	0.0260149	0.202624
MAP2K4	35.7727	173.934	167.562	40.6202	48.8813	20.9908	3.44283	1.78359	0.0260292	0.202624
C3orf38	11.9242	20.7064	35.3452	2.70802	4.88813	4.19816	6.1766	2.62681	0.0261087	0.202645
PTBP3	20.8674	237.434	270.98	51.4523	63.5457	8.39632	4.2856	2.0995	0.0260952	0.202645
TM9SF3	163.958	680.551	536.723	165.189	136.868	29.3871	4.14919	2.05283	0.0260829	0.202645
PPP1R12A	29.8106	184.977	230.398	43.3283	63.5457	4.19816	4.01826	2.00657	0.0260977	0.202645
GIMAP2	8.94317	0	0	8.12405	34.2169	12.5945	-7.67202	-2.93961	0.0262782	0.203811
RPL17P50	0	51.0759	65.454	0	0	0	147.711	7.20664	0.0263549	0.203977
SH2B3	163.958	38.652	30.1089	316.838	283.512	163.728	-3.36165	-1.74917	0.0263576	0.203977
ZNF75A	11.9242	0	0	32.4962	9.77627	20.9908	-6.81374	-2.76845	0.0263504	0.203977
WDR25	5.96211	2.76086	1.30908	21.6641	9.77627	16.7926	-5.76748	-2.52794	0.0263874	0.204058
TMEM60	5.96211	60.7389	74.6176	5.41603	9.77627	16.7926	4.56777	2.19149	0.0264573	0.204248
GIMAP4	29.8106	0	0	21.6641	58.6576	79.7651	-5.60146	-2.4858	0.0264702	0.204248
DMPK	23.8485	9.663	6.5454	37.9122	39.1051	50.3779	-3.7397	-1.90292	0.0264616	0.204248
MTMR9LP	8.94317	0	0	8.12405	19.5525	20.9908	-7.59688	-2.92541	0.026577	0.204665
PIK3CB	29.8106	28.989	70.6903	16.2481	9.77627	0	4.55327	2.1869	0.0265723	0.204665
HACE1	5.96211	53.8367	34.0361	10.8321	4.88813	0	5.38099	2.42787	0.0266018	0.204665
WTAP	62.6022	173.934	172.799	43.3283	43.9932	41.9816	3.21479	1.68473	0.0265862	0.204665
KIFAP3	35.7727	67.641	73.3085	10.8321	24.4407	20.9908	3.5685	1.83532	0.026736	0.205008
CLIP4	32.7916	0	0	92.0726	68.4339	16.7926	-5.61891	-2.49029	0.026899	0.205008
TTLL4	26.8295	67.641	99.4901	18.9561	29.3288	0	4.0647	2.02315	0.0267805	0.205008
CARD6	44.7159	0	1.30908	94.7806	73.322	50.3779	-4.9362	-2.3034	0.0268706	0.205008
WDR55	8.94317	6.90214	10.4726	35.2042	24.4407	50.3779	-4.1048	-2.03731	0.0268883	0.205008
AQP1_2	5.96211	56.5976	47.1269	0	0	0	140.891	7.13844	0.0268894	0.205008
CDC37L1	17.8863	71.7823	70.6903	10.8321	14.6644	16.7926	3.96523	1.9874	0.0268032	0.205008
ASAH2	2.98106	30.3694	28.7998	2.70802	0	4.19816	8.17069	3.03046	0.0268785	0.205008
CDKN1C	116.261	0	0	0	0	8.39632	12.8884	3.688	0.0267683	0.205008
PC	5.96211	107.673	123.054	21.6641	14.6644	20.9908	4.10036	2.03575	0.0266826	0.205008
KLF12	5.96211	1.38043	0	18.9561	14.6644	4.19816	-7.12598	-2.83309	0.026714	0.205008
NOP56	348.784	200.162	240.871	70.4084	58.6576	121.747	3.11604	1.63971	0.0268968	0.205008
APOL1	50.678	1.38043	0	18.9561	73.322	188.917	-5.5069	-2.46124	0.0266854	0.205008
AIM1	2.98106	4.14129	0	18.9561	39.1051	0	-7.54267	-2.91508	0.0269316	0.205108
CROT	0	49.6954	45.8178	2.70802	4.88813	8.39632	6.03977	2.59449	0.026994	0.205435
IFT74	5.96211	22.0869	31.4179	2.70802	4.88813	0	7.91601	2.98477	0.0270333	0.205586
DOCK7	38.7537	80.0649	78.5448	29.7882	14.6644	4.19816	3.76265	1.91175	0.0271469	0.205985
NAB1	14.9053	128.38	109.963	29.7882	29.3288	4.19816	3.9669	1.98801	0.0272302	0.205985
TRA2B	116.261	133.902	236.944	78.5325	43.9932	8.39632	3.60951	1.8518	0.0272046	0.205985
DCAF16	11.9242	0	0	18.9561	29.3288	12.5945	-6.78144	-2.76159	0.0272081	0.205985
EMCN	110.299	12.4239	13.0908	73.1164	229.742	193.115	-3.72841	-1.89856	0.0272058	0.205985
HOXB5	20.8674	34.5107	24.8725	2.70802	4.88813	8.39632	5.43799	2.44307	0.027242	0.205985
BTBD3	8.94317	99.3909	103.417	18.9561	14.6644	16.7926	4.18034	2.06362	0.0271293	0.205985
TTC38	11.9242	0	0	13.5401	34.2169	16.7926	-6.80883	-2.76741	0.0272358	0.205985
CEP120	8.94317	52.4563	49.7451	8.12405	9.77627	8.39632	4.35337	2.12213	0.0273167	0.206117
STK3	20.8674	55.2171	56.2905	13.5401	14.6644	4.19816	4.15453	2.05468	0.0273774	0.206117
EMC2	14.9053	103.532	85.0902	5.41603	29.3288	16.7926	4.18082	2.06379	0.0273962	0.206117
CEMP1	5.96211	0	0	0	4.88813	54.5761	-10.4233	-3.38174	0.0273386	0.206117
CENPT	32.7916	11.0434	1.30908	51.4523	43.9932	71.3687	-4.00481	-2.00173	0.027374	0.206117
SPAG9	292.144	919.365	1142.83	268.094	259.071	46.1798	4.1002	2.03569	0.0273242	0.206117
MEX3C	38.7537	138.043	197.671	54.1603	43.9932	8.39632	3.47764	1.79811	0.0273598	0.206117
LBX2-AS1	8.94317	0	0	18.9561	4.88813	25.189	-7.72528	-2.94959	0.0274173	0.206128
MTSS1	71.5454	245.716	174.108	54.1603	63.5457	16.7926	3.66351	1.87323	0.027442	0.206167
TWF1P1	0	62.1193	49.7451	0	0	0	141.898	7.14871	0.027475	0.206268
FAM117B	2.98106	56.5976	49.7451	0	0	0	139.7	7.12619	0.0275792	0.206903
C1orf216	29.8106	12.4239	7.85448	40.6202	39.1051	92.3595	-3.73498	-1.9011	0.0276674	0.207335
PSAP	1726.03	303.694	439.851	2550.95	2629.82	3912.69	-3.68995	-1.8836	0.0276761	0.207335
SATB2	0	23.4673	32.727	2.70802	0	0	13.8408	3.79086	0.0277321	0.207607
SLC37A1	8.94317	0	1.30908	18.9561	14.6644	12.5945	-6.54397	-2.71017	0.0278145	0.208076
WDR45	11.9242	9.663	13.0908	35.2042	19.5525	75.5669	-3.69762	-1.8866	0.0278402	0.208121
ATP1B3	238.485	35.8911	41.8906	287.05	400.827	457.6	-3.67336	-1.8771	0.0279545	0.208827
FKBP2	35.7727	20.7064	14.3999	81.2405	29.3288	125.945	-3.51746	-1.81453	0.027992	0.20896
C15orf52	35.7727	27.6086	20.9453	75.8245	112.427	75.5669	-3.20304	-1.67944	0.0281815	0.210225
KEAP1	71.5454	52.4563	34.0361	146.233	102.651	209.908	-3.0279	-1.59832	0.0282508	0.210593
MXD4	137.129	23.4673	22.2544	165.189	180.861	302.268	-3.63379	-1.86147	0.0283204	0.210594
LHFPL2	44.7159	5.52171	11.7817	62.2844	107.539	50.3779	-3.79511	-1.92414	0.0283308	0.210594
SLC43A3	26.8295	17.9456	6.5454	37.9122	68.4339	71.3687	-3.65054	-1.86811	0.0283253	0.210594
NAPB	2.98106	2.76086	0	8.12405	14.6644	16.7926	-6.49585	-2.69952	0.0282935	0.210594
PSME4	80.4885	433.455	610.032	94.7806	141.756	62.9724	3.77081	1.91487	0.0284474	0.211067
KDM3A	83.4696	285.749	341.67	124.569	58.6576	16.7926	3.50141	1.80794	0.028494	0.211067
TNFRSF1A	146.072	37.2716	39.2724	186.853	200.413	319.06	-3.25899	-1.70443	0.0284698	0.211067
GAS7	0	60.7389	48.436	0	0	0	138.557	7.11434	0.0284945	0.211067
SON	268.295	1196.83	1132.35	295.174	283.512	71.3687	3.99148	1.99693	0.028427	0.211067
RPE	44.7159	82.8257	61.5268	18.9561	24.4407	12.5945	3.52894	1.81924	0.0286506	0.212075
TBCD	59.6211	19.326	15.709	73.1164	68.4339	159.53	-3.35015	-1.74422	0.028725	0.212476
SLC39A10	29.8106	95.2496	52.3632	16.2481	29.3288	0	3.98311	1.9939	0.0287661	0.212631
PARP9	8.94317	1.38043	0	21.6641	9.77627	12.5945	-6.54251	-2.70984	0.0292494	0.214077
TBC1D19	8.94317	106.293	94.2538	24.3721	19.5525	4.19816	4.2728	2.09518	0.0292166	0.214077
NFXL1	2.98106	93.8691	99.4901	24.3721	14.6644	0	4.86947	2.28376	0.0290743	0.214077
UBE2D3	223.579	603.247	870.539	170.605	190.637	100.756	3.68158	1.88032	0.0291502	0.214077
ENPP5	0	57.978	49.7451	0	0	0	136.763	7.09553	0.0292745	0.214077
TACC1	286.181	23.4673	20.9453	419.743	738.108	319.06	-4.50494	-2.17151	0.029215	0.214077
SDC2	5.96211	28.989	49.7451	2.70802	9.77627	4.19816	5.51265	2.46275	0.0290919	0.214077
SLK	92.4128	480.389	511.85	129.985	117.315	46.1798	3.68857	1.88306	0.0292948	0.214077
DEAF1	38.7537	8.28257	26.1816	37.9122	58.6576	163.728	-3.61424	-1.85369	0.029327	0.214077
RIC8B	11.9242	128.38	71.9994	27.0802	4.88813	16.7926	4.17824	2.0629	0.0291328	0.214077
ARHGAP5	32.7916	168.412	168.871	35.2042	63.5457	8.39632	3.49889	1.8069	0.0291763	0.214077
RHOT2	26.8295	9.663	13.0908	48.7443	34.2169	62.9724	-3.40072	-1.76584	0.0291424	0.214077
MVD	17.8863	5.52171	7.85448	40.6202	24.4407	41.9816	-4.1007	-2.03587	0.0293164	0.214077
LEPREL4	11.9242	12.4239	7.85448	29.7882	24.4407	71.3687	-3.8523	-1.94572	0.0290813	0.214077
SPOP	32.7916	247.097	219.926	51.4523	48.8813	33.5853	3.73408	1.90075	0.0293067	0.214077
CTD-2541J13.2	11.9242	33.1303	24.8725	0	14.6644	0	6.3638	2.66989	0.0292605	0.214077
UQCRFS1	41.7348	9.663	15.709	67.7004	34.2169	121.747	-3.55331	-1.82916	0.0291046	0.214077
EDA2R	0	37.2716	41.8906	8.12405	0	0	7.92194	2.98585	0.0290311	0.214077
NOA1	26.8295	11.0434	9.16356	46.0363	29.3288	62.9724	-3.49459	-1.80512	0.029432	0.214695
VPS13B	14.9053	209.825	179.344	29.7882	68.4339	4.19816	3.97955	1.99261	0.0294628	0.214771
POTEF	0	70.4019	36.6543	0	0	0	135.848	7.08585	0.0295682	0.214801
CYBRD1	26.8295	0	0	51.4523	63.5457	25.189	-5.54453	-2.47107	0.0295528	0.214801
AAMP	95.3938	353.39	384.87	102.905	48.8813	100.756	3.28202	1.71458	0.0295392	0.214801
HSPA9	530.628	1105.72	1624.57	506.399	210.19	130.143	3.82857	1.93681	0.0295688	0.214801
DYRK4	11.9242	0	0	16.2481	14.6644	25.189	-6.74649	-2.75414	0.0295561	0.214801
GLS	143.091	276.086	314.179	70.4084	122.203	46.1798	3.1409	1.65118	0.0297254	0.215791
TBC1D8B	11.9242	40.0324	48.436	10.8321	9.77627	0	4.70504	2.23421	0.0297781	0.216024
ZSWIM7	8.94317	1.38043	0	10.8321	14.6644	25.189	-6.54699	-2.71083	0.0298729	0.216563
HIPK1	71.5454	259.521	352.143	100.197	78.2101	20.9908	3.40442	1.76741	0.0300566	0.216694
RGS16	110.299	1.38043	6.5454	0	0	0	146.502	7.19477	0.0299744	0.216694
LANCL1	5.96211	31.7499	43.1997	5.41603	4.88813	4.19816	5.54145	2.47026	0.0300446	0.216694
STK16	20.8674	100.771	70.6903	8.12405	9.77627	33.5853	3.85396	1.94634	0.0299293	0.216694
SMAP1	89.4317	179.456	179.344	67.7004	48.8813	12.5945	3.38936	1.76101	0.0300183	0.216694
GBA2	35.7727	8.28257	5.23632	62.2844	58.6576	41.9816	-3.74976	-1.9068	0.0300759	0.216694
OTUD1	2.98106	8.28257	44.5087	0	4.88813	0	12.1656	3.60474	0.0300524	0.216694
NAE1	8.94317	154.608	153.162	16.2481	43.9932	25.189	3.78064	1.91863	0.029966	0.216694
BRD1	38.7537	121.478	221.235	56.8683	39.1051	12.5945	3.46504	1.79287	0.0300752	0.216694
KAT6B	17.8863	49.6954	64.1449	16.2481	9.77627	4.19816	4.16302	2.05763	0.0301533	0.217089
NF1	26.8295	194.64	236.944	51.4523	58.6576	4.19816	3.99985	1.99995	0.0301787	0.217089
METTL23	17.8863	6.90214	1.30908	18.9561	29.3288	58.7742	-4.53021	-2.17958	0.0301925	0.217089
ST6GAL1	20.8674	5.52171	9.16356	37.9122	83.0983	12.5945	-3.92879	-1.97408	0.0303615	0.218156
ATP2B4	119.242	4.14129	3.92724	189.561	278.624	92.3595	-4.47168	-2.16082	0.030507	0.218617
HSP90AA6P	0	45.5541	57.5995	0	0	0	131.102	7.03455	0.0305047	0.218617
GSTO2	8.94317	46.9346	40.5815	0	0	0	125.757	6.9745	0.0305086	0.218617
STAG2	41.7348	434.835	497.451	97.4886	127.091	29.3871	3.83961	1.94096	0.0304951	0.218617
VAMP8	20.8674	8.28257	2.61816	27.0802	14.6644	88.1614	-4.3563	-2.1231	0.0305661	0.21888
NFATC3	14.9053	201.543	196.362	24.3721	48.8813	41.9816	3.63285	1.8611	0.0305894	0.218899
RASA2	8.94317	19.326	26.1816	2.70802	4.88813	0	7.5311	2.91286	0.0306641	0.219284
ACTR3	339.841	698.497	955.629	216.641	229.742	109.152	3.59243	1.84496	0.0307728	0.219319
RP11-958N24.1	0	11.0434	3.92724	16.2481	87.9864	0	-6.21244	-2.63516	0.0307294	0.219319
ZNF423	2.98106	52.4563	43.1997	0	0	0	126.49	6.98288	0.0307726	0.219319
NAT9	35.7727	13.8043	11.7817	56.8683	43.9932	71.3687	-3.35263	-1.74529	0.0307084	0.219319
BACE2	113.28	8.28257	3.92724	159.773	190.637	134.341	-3.9447	-1.97992	0.0307425	0.219319
BTN3A3	5.96211	0	1.30908	10.8321	9.77627	16.7926	-6.4933	-2.69895	0.0308758	0.219904
ALG8	74.5264	45.5541	26.1816	5.41603	19.5525	12.5945	4.01819	2.00655	0.031016	0.220754
DTYMK	11.9242	1.38043	0	13.5401	9.77627	46.1798	-6.13736	-2.61762	0.0311062	0.221246
Z82188.1	11.9242	0	0	13.5401	4.88813	58.7742	-7.19845	-2.84769	0.0312074	0.221816
H3F3A	196.75	806.17	693.813	116.445	117.315	230.899	3.66534	1.87395	0.0313327	0.221908
YPEL5	95.3938	242.955	471.269	97.4886	68.4339	83.9632	3.23395	1.6933	0.0312786	0.221908
KCMF1	119.242	328.542	557.668	111.029	97.7627	92.3595	3.34256	1.74095	0.0313676	0.221908
CXCR4	11.9242	0	0	0	53.7695	37.7834	-7.98925	-2.99806	0.0313566	0.221908
EXOC3	44.7159	34.5107	31.4179	105.613	92.8745	100.756	-2.85824	-1.51513	0.0313634	0.221908
ZSCAN9	8.94317	0	0	8.12405	29.3288	12.5945	-7.22847	-2.85369	0.0312868	0.221908
PWWP2B	17.8863	2.76086	3.92724	10.8321	29.3288	67.1706	-4.73072	-2.24206	0.0312872	0.221908
EIF4A1P9	0	45.5541	54.9814	0	0	0	127.855	6.99836	0.0313911	0.221926
CNRIP1	83.4696	5.52171	2.61816	211.225	39.1051	130.143	-4.26235	-2.09165	0.0314829	0.222303
LRRC1	2.98106	0	2.61816	16.2481	14.6644	4.19816	-6.493	-2.69889	0.0314918	0.222303
DIS3L	17.8863	37.2716	61.5268	13.5401	0	12.5945	4.14129	2.05008	0.0315077	0.222303
LGALSL	5.96211	20.7064	31.4179	0	4.88813	4.19816	7.54772	2.91604	0.0316063	0.222404
TMCC3	17.8863	5.52171	1.30908	37.9122	48.8813	12.5945	-4.58116	-2.19571	0.0315783	0.222404
SLC14A1	0	67.641	32.727	0	0	0	127.523	6.99461	0.0315977	0.222404
HNRNPH2	74.5264	253.999	302.398	89.3645	78.2101	4.19816	3.6505	1.8681	0.0315455	0.222404
SLC35F5	38.7537	74.5431	145.308	21.6641	48.8813	4.19816	3.55699	1.83066	0.0316479	0.222517
SBNO1	59.6211	231.912	319.416	86.6565	63.5457	29.3871	3.37823	1.75627	0.0316646	0.222517
NUP54	11.9242	64.8801	96.872	24.3721	9.77627	8.39632	3.91082	1.96747	0.0317726	0.222831
MARCH2	20.8674	5.52171	15.709	54.1603	9.77627	88.1614	-3.74435	-1.90471	0.0317583	0.222831
PEX26	26.8295	1.38043	1.30908	43.3283	53.7695	29.3871	-4.77937	-2.25682	0.0317579	0.222831
SNRNP200	140.11	773.04	863.993	208.517	161.308	109.152	3.70354	1.88891	0.0318044	0.222906
LDLRAD2	2.98106	0	2.61816	5.41603	19.5525	16.7926	-6.49745	-2.69987	0.0319597	0.223252
KMT2E	47.6969	307.836	282.761	73.1164	92.8745	8.39632	3.66176	1.87254	0.0319233	0.223252
TIAL1	77.5075	296.792	253.962	78.5325	53.7695	67.1706	3.14215	1.65175	0.0319093	0.223252
AC012379.1	5.96211	0	0	27.0802	0	12.5945	-8.41715	-3.07333	0.0319257	0.223252
CCDC22	32.7916	51.0759	70.6903	10.8321	9.77627	25.189	3.58808	1.84321	0.0319436	0.223252
ADD2	0	55.2171	43.1997	0	0	0	125.201	6.9681	0.0320064	0.223422
CYTH4	0	53.8367	44.5087	0	0	0	125.119	6.96716	0.0320264	0.223422
CASP6	17.8863	4.14129	5.23632	27.0802	34.2169	33.5853	-4.18261	-2.0644	0.0321349	0.223863
ABCE1	56.6401	313.357	319.416	51.4523	127.091	25.189	3.42493	1.77607	0.0321532	0.223863
CSTF2T	5.96211	62.1193	64.1449	8.12405	14.6644	8.39632	4.38345	2.13207	0.0321314	0.223863
SNRPA1	50.678	57.978	60.2177	16.2481	9.77627	20.9908	3.55362	1.82929	0.0322029	0.224061
DUSP16	26.8295	38.652	47.1269	16.2481	9.77627	0	3.98193	1.99347	0.0322575	0.224293
ZNF440	8.94317	0	1.30908	16.2481	14.6644	12.5945	-6.04945	-2.5968	0.0323856	0.225035
RAB21	50.678	92.4887	112.581	32.4962	39.1051	0	3.55613	1.83031	0.032462	0.225418
ADPRHL2	17.8863	9.663	17.018	56.8683	24.4407	54.5761	-3.31642	-1.72963	0.0325343	0.225467
NSUN5P2	8.94317	0	0	8.12405	4.88813	46.1798	-7.63498	-2.93262	0.0325761	0.225467
FAM179B	17.8863	73.1627	82.4721	24.3721	14.6644	4.19816	3.85784	1.94779	0.0325556	0.225467
LRRC49	14.9053	35.8911	62.8359	13.5401	9.77627	4.19816	4.01096	2.00395	0.0325698	0.225467
CMC4	5.96211	0	1.30908	10.8321	0	37.7834	-7.37758	-2.88315	0.0325658	0.225467
RPL6P27	0	38.652	49.7451	0	0	12.5945	6.94556	2.79609	0.0326003	0.225487
DBF4	8.94317	26.2281	28.7998	8.12405	0	0	6.15839	2.62255	0.0327183	0.225859
EIF4EBP1	59.6211	249.858	438.542	108.321	34.2169	75.5669	3.39537	1.76357	0.032685	0.225859
AGPAT2	50.678	2.76086	7.85448	46.0363	29.3288	172.125	-4.18038	-2.06364	0.0327022	0.225859
KAT2A	32.7916	161.51	149.235	24.3721	19.5525	58.7742	3.38253	1.7581	0.0327688	0.22606
S100A13	59.6211	1.38043	1.30908	59.5764	34.2169	205.71	-4.92417	-2.29988	0.0328304	0.226217
CCDC149	5.96211	0	3.92724	21.6641	9.77627	16.7926	-5.76773	-2.528	0.0328522	0.226217
ATAD1	26.8295	135.282	123.054	29.7882	34.2169	25.189	3.24571	1.69853	0.032856	0.226217
SMG1	113.28	622.573	958.247	151.649	219.966	4.19816	4.50683	2.17211	0.0329212	0.226518
SNX19	89.4317	30.3694	23.5634	167.897	190.637	75.5669	-3.14573	-1.6534	0.0329859	0.22655
CSRP2	17.8863	20.7064	18.3271	2.70802	0	4.19816	7.13596	2.83511	0.032967	0.22655
NPIPP1	8.94317	0	0	27.0802	9.77627	8.39632	-7.11911	-2.8317	0.0329902	0.22655
EPB41	23.8485	24.8477	19.6362	89.3645	97.7627	29.3871	-3.19139	-1.67418	0.0332817	0.226605
ABCA4	11.9242	16.5651	15.709	2.70802	0	0	10.4373	3.38367	0.0335781	0.226605
RAB1A	244.447	721.964	699.049	184.145	180.861	109.152	3.51505	1.81355	0.0332406	0.226605
SEC22C	38.7537	2.76086	2.61816	59.5764	43.9932	58.7742	-3.9988	-1.99957	0.0333478	0.226605
TMEM39A	38.7537	95.2496	112.581	37.9122	24.4407	8.39632	3.37725	1.75585	0.0335997	0.226605
AGA	11.9242	35.8911	34.0361	2.70802	9.77627	8.39632	4.75411	2.24918	0.0333079	0.226605
TBC1D7	38.7537	6.90214	0	83.9485	43.9932	58.7742	-4.32631	-2.11314	0.0335627	0.226605
RNF144B	35.7727	0	1.30908	75.8245	48.8813	37.7834	-4.63374	-2.21218	0.0335	0.226605
GJA1	390.519	135.282	246.107	135.401	73.322	20.9908	3.28556	1.71614	0.0332958	0.226605
IFNGR1	26.8295	0	0	29.7882	43.9932	62.9724	-5.40873	-2.43529	0.0332054	0.226605
NAA38	17.8863	2.76086	2.61816	32.4962	14.6644	37.7834	-4.66598	-2.22218	0.0334579	0.226605
TRIM24	26.8295	207.064	233.016	29.7882	73.322	25.189	3.70257	1.88853	0.0330849	0.226605
COQ4	20.8674	4.14129	0	27.0802	19.5525	67.1706	-5.00303	-2.3228	0.0333438	0.226605
ZNF365	2.98106	45.5541	44.5087	0	0	0	119.638	6.90254	0.0332071	0.226605
CCAR1	62.6022	309.216	350.834	70.4084	117.315	29.3871	3.35444	1.74607	0.0331667	0.226605
RASSF7	11.9242	1.38043	0	13.5401	4.88813	58.7742	-6.45607	-2.69066	0.033543	0.226605
VPS29	86.4507	146.325	162.326	51.4523	58.6576	25.189	2.96924	1.57009	0.0331542	0.226605
TRIM13	5.96211	4.14129	3.92724	16.2481	39.1051	16.7926	-4.79651	-2.26199	0.0331265	0.226605
TCF12	44.7159	209.825	284.07	70.4084	63.5457	4.19816	3.87394	1.9538	0.0330496	0.226605
STARD5	44.7159	2.76086	7.85448	2.70802	0	0	12.6277	3.65852	0.03339	0.226605
ACD	5.96211	1.38043	3.92724	10.8321	9.77627	37.7834	-5.26671	-2.3969	0.0335485	0.226605
C17orf61-PLSCR3	2.98106	52.4563	37.9633	0	0	0	119.982	6.90667	0.0331071	0.226605
SRSF2	253.39	358.911	454.251	97.4886	97.7627	142.737	3.20495	1.6803	0.0333678	0.226605
NEDD4L	86.4507	73.1627	108.654	29.7882	43.9932	16.7926	3.02566	1.59725	0.0335436	0.226605
HNRNPM	232.522	564.595	486.978	151.649	58.6576	151.134	3.51741	1.81451	0.033346	0.226605
BLVRB	92.4128	208.445	234.325	37.9122	24.4407	96.5577	3.39415	1.76305	0.03351	0.226605
C19orf48	11.9242	0	0	13.5401	4.88813	54.5761	-6.84751	-2.77558	0.0335948	0.226605
ZNF335	29.8106	60.7389	85.0902	18.9561	0	25.189	3.81065	1.93004	0.0335565	0.226605
SNX10	0	45.5541	49.7451	0	0	0	121.359	6.92314	0.033627	0.226644
C1orf35	14.9053	8.28257	2.61816	24.3721	14.6644	62.9724	-4.27012	-2.09428	0.0336805	0.226746
MATN2	2.98106	44.1737	44.5087	0	0	0	117.943	6.88195	0.0337155	0.226746
PRPF8	342.822	1283.8	1480.57	287.05	327.505	243.493	3.62793	1.85915	0.0337251	0.226746
SHPK_2	8.94317	0	1.30908	16.2481	19.5525	8.39632	-6.0497	-2.59686	0.0337281	0.226746
TXLNA	83.4696	49.6954	51.0541	184.145	180.861	163.728	-3.12111	-1.64206	0.0342425	0.226871
ZC3H15	29.8106	216.727	261.816	48.7443	68.4339	20.9908	3.70035	1.88766	0.0340123	0.226871
ARPC2	497.837	1035.32	1263.26	254.554	215.078	331.655	3.49601	1.80571	0.0342007	0.226871
ATP10D	20.8674	91.1083	117.817	24.3721	34.2169	4.19816	3.69318	1.88486	0.0341308	0.226871
HNRNPD	125.204	340.966	333.816	81.2405	87.9864	96.5577	3.04643	1.60712	0.0342183	0.226871
ZNF330	32.7916	60.7389	112.581	21.6641	9.77627	25.189	3.59744	1.84697	0.0340232	0.226871
SMARCA5	83.4696	390.661	306.325	73.1164	112.427	58.7742	3.22935	1.69124	0.0341139	0.226871
ANAPC10	8.94317	26.2281	39.2724	5.41603	4.88813	4.19816	5.179	2.37267	0.0341649	0.226871
TSPAN17	74.5264	6.90214	19.6362	116.445	83.0983	121.747	-3.32812	-1.73471	0.034234	0.226871
SUPT3H	2.98106	22.0869	22.2544	2.70802	0	0	11.803	3.56108	0.034047	0.226871
CCDC132	20.8674	89.7279	100.799	18.9561	24.4407	16.7926	3.60104	1.84841	0.0338041	0.226871
ST6GALNAC6	32.7916	6.90214	6.5454	43.3283	34.2169	67.1706	-3.55151	-1.82843	0.034108	0.226871
NHLRC2	26.8295	70.4019	62.8359	18.9561	19.5525	4.19816	3.75762	1.90982	0.0339158	0.226871
DIABLO	23.8485	19.326	20.9453	97.4886	29.3288	71.3687	-3.29173	-1.71885	0.0338226	0.226871
EML5	0	57.978	36.6543	0	0	0	120.467	6.91249	0.0340581	0.226871
KIF26A	0	31.7499	19.6362	2.70802	0	0	12.6822	3.66473	0.0341757	0.226871
IGF1R	14.9053	44.1737	51.0541	13.5401	9.77627	4.19816	3.91941	1.97064	0.0341932	0.226871
VASN	62.6022	4.14129	5.23632	5.41603	0	0	9.62526	3.26683	0.0340502	0.226871
NME1	271.276	74.5431	69.3813	56.8683	19.5525	46.1798	3.25906	1.70445	0.033935	0.226871
COX7A1	14.9053	0	0	16.2481	14.6644	54.5761	-6.47904	-2.69578	0.034039	0.226871
FTL	4727.96	2742.91	3891.9	7471.42	6936.26	24563.4	-3.42999	-1.7782	0.0340748	0.226871
ZNF580	17.8863	4.14129	3.92724	24.3721	9.77627	71.3687	-4.44549	-2.15234	0.034205	0.226871
ZBTB45	11.9242	1.38043	1.30908	18.9561	19.5525	16.7926	-5.22775	-2.38619	0.0338313	0.226871
TIMP1	253.39	4.14129	7.85448	205.809	146.644	973.973	-5.02238	-2.32837	0.0342629	0.226871
PITPNA	214.636	715.062	768.43	192.269	151.532	138.539	3.51607	1.81397	0.0343148	0.227072
SLC35D1	20.8674	33.1303	54.9814	8.12405	9.77627	12.5945	3.78846	1.92161	0.034491	0.22746
ANKH	41.7348	124.239	197.671	29.7882	43.9932	46.1798	3.10611	1.63511	0.0345188	0.22746
CICP14	5.96211	0	0	16.2481	24.4407	0	-8.26974	-3.04784	0.0345285	0.22746
CNOT4	23.8485	106.293	100.799	24.3721	34.2169	8.39632	3.5048	1.80933	0.0345459	0.22746
RRM2B	71.5454	22.0869	23.5634	132.693	180.861	46.1798	-3.17387	-1.66624	0.0344472	0.22746
ZCRB1	47.6969	38.652	39.2724	13.5401	4.88813	12.5945	3.60317	1.84927	0.0344286	0.22746
TLK2	38.7537	247.097	316.797	75.8245	48.8813	50.3779	3.42555	1.77634	0.0345391	0.22746
MRPL39	11.9242	38.652	61.5268	10.8321	9.77627	8.39632	3.90565	1.96556	0.0345131	0.22746
MB21D2	0	24.8477	36.6543	2.70802	0	4.19816	7.99057	2.9983	0.0346334	0.227893
PLXNA1	53.659	227.771	303.707	78.5325	53.7695	46.1798	3.26171	1.70563	0.0346972	0.228028
ALDOC	14.9053	37.2716	28.7998	0	0	0	111.721	6.80376	0.0346966	0.228028
NME3	38.7537	1.38043	1.30908	24.3721	39.1051	117.548	-4.56304	-2.19	0.0347205	0.228039
PLEKHA3P1	41.7348	2.76086	9.16356	2.70802	0	0	12.1652	3.60468	0.034748	0.228078
GOLGA8B	8.94317	0	0	24.3721	19.5525	4.19816	-7.15684	-2.83932	0.0348002	0.228137
RPS28	315.992	81.4453	102.108	292.466	239.519	1377	-3.83801	-1.94036	0.0347924	0.228137
UGP2	80.4885	109.054	146.617	40.6202	43.9932	29.3871	3.01619	1.59273	0.0348297	0.228189
CUL2	44.7159	151.847	174.108	51.4523	29.3288	37.7834	3.09692	1.63083	0.0348612	0.228254
SNRPA	35.7727	104.913	128.29	37.9122	4.88813	33.5853	3.39906	1.76514	0.0349625	0.228775
AFF3	2.98106	27.6086	39.2724	5.41603	4.88813	0	6.34059	2.66462	0.035051	0.229211
HNRNPDL	202.712	379.618	400.579	138.109	78.2101	92.3595	3.13647	1.64914	0.0351877	0.229222
PPP1R35	8.94317	0	0	10.8321	4.88813	37.7834	-7.23841	-2.85567	0.0352076	0.229222
PPP1R3B	44.7159	4.14129	1.30908	51.4523	92.8745	54.5761	-4.18184	-2.06414	0.0351147	0.229222
CDK5RAP2	32.7916	17.9456	11.7817	62.2844	58.6576	50.3779	-3.15794	-1.65898	0.0352445	0.229222
WBP1L	41.7348	34.5107	44.5087	64.9924	122.203	167.926	-2.86443	-1.51825	0.0352597	0.229222
ARGLU1	101.356	289.89	244.798	62.2844	107.539	41.9816	3.06332	1.6151	0.0351651	0.229222
HERC2P9	8.94317	11.0434	10.4726	18.9561	73.322	33.5853	-3.72325	-1.89656	0.0352324	0.229222
PCSK6	0	64.8801	27.4907	0	0	0	117.556	6.8772	0.0352598	0.229222
ATP9A	29.8106	0	0	62.2844	68.4339	16.7926	-5.17755	-2.37227	0.0352699	0.229222
MOSPD2	11.9242	92.4887	95.5629	21.6641	24.4407	4.19816	3.96632	1.9878	0.0352156	0.229222
USP38	20.8674	55.2171	81.163	16.2481	19.5525	8.39632	3.6364	1.86251	0.035318	0.229393
PPCS	11.9242	5.52171	5.23632	21.6641	19.5525	46.1798	-4.16008	-2.05661	0.0355171	0.229874
KPNA1	68.5643	213.966	256.58	78.5325	58.6576	20.9908	3.37393	1.75443	0.0354823	0.229874
RBM48	14.9053	0	3.92724	21.6641	19.5525	37.7834	-5.21407	-2.38241	0.0354603	0.229874
FAM160B2	20.8674	11.0434	9.16356	54.1603	24.4407	37.7834	-3.40517	-1.76773	0.0355208	0.229874
DNAJC14	41.7348	120.097	120.435	32.4962	29.3288	33.5853	3.01099	1.59024	0.0355664	0.229874
PTGES3	256.371	383.759	543.268	119.153	171.085	71.3687	3.30898	1.72639	0.035543	0.229874
WSB2	101.356	237.434	233.016	100.197	43.9932	33.5853	3.12873	1.64558	0.0355563	0.229874
ANKRD10	20.8674	22.0869	17.018	43.3283	87.9864	62.9724	-3.02897	-1.59883	0.0354788	0.229874
CTCF	26.8295	155.988	108.654	43.3283	24.4407	20.9908	3.23125	1.69209	0.0356022	0.229964
HLA-L	2.98106	20.7064	23.5634	0	0	4.19816	11.4464	3.51683	0.0356331	0.230023
CDC14A	17.8863	19.326	10.4726	2.70802	0	0	10.4426	3.38441	0.0357694	0.230339
AQP1_1	0	57.978	32.727	0	0	0	115.568	6.8526	0.0357509	0.230339
EIF3J	74.5264	153.228	187.199	48.7443	58.6576	29.3871	3.08674	1.62608	0.0357222	0.230339
NTN1	0	45.5541	44.5087	0	0	0	114.863	6.84377	0.0357431	0.230339
MRPL37	80.4885	12.4239	11.7817	78.5325	87.9864	176.323	-3.40041	-1.76571	0.0358152	0.230494
CPT1C	14.9053	0	0	5.41603	43.9932	41.9816	-6.67713	-2.73923	0.0358493	0.230572
EED	11.9242	69.0214	70.6903	18.9561	14.6644	4.19816	3.91915	1.97054	0.0358984	0.230748
TRIM3	62.6022	183.597	176.726	43.3283	39.1051	54.5761	3.12946	1.64591	0.0360176	0.231372
SARDH	0	34.5107	54.9814	0	0	0	114.133	6.83457	0.0360921	0.23171
C11orf31	104.337	4.14129	3.92724	64.9924	97.7627	302.268	-4.2026	-2.07128	0.0361644	0.231892
C1GALT1C1	26.8295	84.2061	61.5268	16.2481	24.4407	12.5945	3.39843	1.76487	0.0361477	0.231892
SLC6A6	104.337	74.5431	75.9267	311.422	347.057	96.5577	-2.98763	-1.579	0.036211	0.23205
RICTOR	41.7348	88.3474	106.036	27.0802	39.1051	0	3.59539	1.84615	0.036286	0.232337
CADPS2	20.8674	0	0	43.3283	43.9932	16.7926	-5.45954	-2.44878	0.0362999	0.232337
TP73-AS1	8.94317	0	0	8.12405	9.77627	29.3871	-6.82214	-2.77022	0.0364092	0.232522
ECHDC2	14.9053	0	1.30908	21.6641	19.5525	25.189	-5.65021	-2.4983	0.0364457	0.232522
PFKFB2	8.94317	22.0869	22.2544	0	9.77627	0	7.32965	2.87374	0.0363729	0.232522
KYNU	5.96211	0	0	10.8321	0	29.3871	-8.10268	-3.0184	0.0365474	0.232522
GLB1	107.318	24.8477	9.16356	113.737	166.197	180.521	-3.34668	-1.74273	0.0365981	0.232522
DHX36	38.7537	138.043	107.345	32.4962	43.9932	16.7926	3.10924	1.63656	0.036587	0.232522
GNPDA2	26.8295	46.9346	74.6176	10.8321	14.6644	20.9908	3.39882	1.76503	0.0365274	0.232522
GSPT1	238.485	472.107	441.16	148.941	136.868	58.7742	3.32848	1.73486	0.0363899	0.232522
CDH13	128.185	477.628	438.542	64.9924	180.861	67.1706	3.38555	1.75939	0.0365121	0.232522
KLHL36	38.7537	4.14129	2.61816	54.1603	63.5457	41.9816	-3.81541	-1.93184	0.0366153	0.232522
APBA3	14.9053	8.28257	6.5454	43.3283	19.5525	33.5853	-3.82877	-1.93688	0.0365418	0.232522
C22orf29	23.8485	0	0	24.3721	63.5457	33.5853	-5.43802	-2.44308	0.036567	0.232522
PTCHD1	0	40.0324	48.436	0	0	0	112.89	6.81877	0.0364956	0.232522
DGKD	2.98106	96.63	129.599	16.2481	34.2169	4.19816	4.23508	2.08239	0.0366648	0.232696
NDEL1	125.204	209.825	297.161	102.905	34.2169	67.1706	3.01609	1.59268	0.0367709	0.233201
AOC2	5.96211	15.1847	18.3271	2.70802	0	0	10.0671	3.33157	0.0367887	0.233201
IDUA	11.9242	6.90214	11.7817	21.6641	48.8813	50.3779	-3.6967	-1.88624	0.0368599	0.233232
CPQ	20.8674	196.021	196.362	35.2042	39.1051	50.3779	3.34132	1.74042	0.0368417	0.233232
OPA3	17.8863	9.663	11.7817	46.0363	39.1051	33.5853	-3.30828	-1.72608	0.0368307	0.233232
PCDH1	116.261	640.519	479.123	102.905	131.98	117.548	3.52658	1.81827	0.0369169	0.233282
ZSCAN32	8.94317	0	0	21.6641	9.77627	8.39632	-6.83099	-2.7721	0.0369341	0.233282
MTSS1L	26.8295	15.1847	10.4726	51.4523	58.6576	46.1798	-3.32023	-1.73129	0.0369085	0.233282
DMAP1	17.8863	12.4239	11.7817	21.6641	53.7695	67.1706	-3.31471	-1.72888	0.037007	0.233603
MORF4L2	354.746	626.715	823.412	243.721	210.19	58.7742	3.50742	1.81041	0.0370354	0.233642
PDLIM1	71.5454	189.119	198.98	24.3721	43.9932	75.5669	3.29084	1.71845	0.0371934	0.234499
RPL39P5	0	41.4129	45.8178	0	0	0	111.357	6.79905	0.0372627	0.234565
TBC1D9	44.7159	2.76086	5.23632	102.905	78.2101	16.7926	-3.95093	-1.98219	0.0372707	0.234565
P2RY2	5.96211	37.2716	26.1816	0	9.77627	4.19816	5.88364	2.55671	0.0372448	0.234565
PPIP5K1	8.94317	77.304	58.9086	27.0802	0	4.19816	4.23316	2.08174	0.0376077	0.236545
IQGAP3	11.9242	17.9456	11.7817	2.70802	0	0	9.70689	3.27901	0.037723	0.236559
ZBTB18	8.94317	106.293	111.272	27.0802	24.4407	8.39632	3.75276	1.90795	0.0378721	0.236559
RND3	268.295	198.782	259.198	138.109	73.322	8.39632	3.24075	1.69633	0.037869	0.236559
MFAP3L	0	51.0759	35.3452	0	0	0	110.303	6.78533	0.0377629	0.236559
FNIP1	20.8674	165.651	273.598	67.7004	43.9932	4.19816	3.92426	1.97242	0.0378204	0.236559
GABBR1	2.98106	169.793	161.017	29.7882	39.1051	16.7926	3.90171	1.96411	0.0377724	0.236559
HLA-A	506.78	34.5107	31.4179	449.531	435.044	1624.69	-4.39809	-2.13688	0.037722	0.236559
HLA-B	280.219	6.90214	5.23632	192.269	366.61	818.641	-4.73472	-2.24328	0.0378719	0.236559
RIMKLB	14.9053	0	0	21.6641	24.4407	25.189	-5.90368	-2.56161	0.037879	0.236559
RPL13A	1192.42	284.368	270.98	1318.8	801.654	4265.33	-3.65972	-1.87173	0.0377483	0.236559
MAPRE1	247.428	233.292	260.507	100.197	87.9864	62.9724	2.86506	1.51856	0.037653	0.236559
RTCB	98.3749	342.346	299.779	86.6565	73.322	88.1614	2.99611	1.58309	0.0377133	0.236559
RP1-241P17.4	0	42.7933	43.1997	0	0	0	109.822	6.77902	0.037915	0.236643
AMMECR1L	50.678	84.2061	112.581	32.4962	29.3288	20.9908	3.02133	1.59519	0.0380667	0.236857
FAM114A2	26.8295	46.9346	47.1269	13.5401	19.5525	0	3.83772	1.94025	0.0379775	0.236857
RALA	265.314	48.315	36.6543	300.59	454.596	474.392	-3.55363	-1.82929	0.0381064	0.236857
KRT8	8.94317	0	0	5.41603	9.77627	37.7834	-7.01127	-2.80968	0.0380992	0.236857
RPS11P6	0	38.652	47.1269	0	0	0	109.557	6.77553	0.0380161	0.236857
DEXI	20.8674	1.38043	3.92724	27.0802	14.6644	62.9724	-4.4827	-2.16437	0.0380974	0.236857
ICAM2	494.856	23.4673	6.5454	560.559	420.379	1565.91	-4.86672	-2.28295	0.0380811	0.236857
AC022210.2	5.96211	34.5107	39.2724	0	0	0	104.528	6.70774	0.0381602	0.236995
RPS6KA3	116.261	513.519	776.285	100.197	224.854	29.3871	3.98551	1.99476	0.0381735	0.236995
UBE2D2	83.4696	271.944	291.925	73.1164	78.2101	67.1706	2.99045	1.58036	0.0382588	0.237385
FAM78B	0	33.1303	52.3632	0	0	0	109.177	6.77053	0.0384078	0.237661
IGF2BP2	86.4507	320.259	486.978	124.569	92.8745	54.5761	3.27297	1.7106	0.0383625	0.237661
ETNK1	41.7348	102.152	83.7812	32.4962	24.4407	12.5945	3.22224	1.68807	0.0384364	0.237661
CCPG1	101.356	12.4239	18.3271	186.853	244.407	29.3871	-3.55173	-1.82852	0.0384836	0.237661
CHRNB1	8.94317	22.0869	19.6362	2.70802	0	4.19816	6.93079	2.79302	0.0384759	0.237661
COPS3	71.5454	120.097	106.036	24.3721	24.4407	58.7742	2.93495	1.55334	0.0384514	0.237661
SLC25A6	327.916	1.38043	1.30908	438.699	347.057	1070.53	-5.62919	-2.49293	0.038465	0.237661
CLCN4	5.96211	46.9346	48.436	10.8321	4.88813	8.39632	4.08297	2.02962	0.0384217	0.237661
GMPS	35.7727	128.38	155.781	37.9122	39.1051	29.3871	3.04178	1.60492	0.0385519	0.237866
BLOC1S5-TXNDC5	104.337	0	0	0	0	0	130.008	7.02245	0.0385802	0.237866
PGF	366.67	20.7064	48.436	189.561	459.484	1179.68	-4.21536	-2.07565	0.0385844	0.237866
TMEM98	65.5833	19.326	17.018	75.8245	87.9864	130.143	-3.0671	-1.61688	0.0386375	0.238054
LCORL	0	46.9346	78.5448	10.8321	9.77627	4.19816	4.94935	2.30724	0.0387171	0.238405
STAM2	23.8485	88.3474	145.308	37.9122	19.5525	20.9908	3.22551	1.68953	0.0387544	0.238495
SMCR8	38.7537	53.8367	89.0175	37.9122	4.88813	0	3.84039	1.94125	0.0388816	0.238909
SLC9A6	23.8485	69.0214	54.9814	18.9561	19.5525	4.19816	3.47234	1.79591	0.0388614	0.238909
SSR4	149.053	24.8477	10.4726	146.233	112.427	415.618	-3.71135	-1.89195	0.0388896	0.238909
DPP9	71.5454	38.652	20.9453	157.065	68.4339	138.539	-2.93203	-1.5519	0.0389417	0.23909
ADM2	11.9242	0	0	70.4084	9.77627	0	-7.13197	-2.8343	0.0389959	0.239284
ITPK1	20.8674	6.90214	2.61816	27.0802	29.3288	46.1798	-4.04089	-2.01467	0.0391301	0.239779
RP11-706O15.3	11.9242	0	0	35.2042	24.4407	4.19816	-6.27366	-2.64931	0.0391275	0.239779
EBP	20.8674	2.76086	2.61816	24.3721	4.88813	88.1614	-4.76954	-2.25385	0.0391448	0.239779
GTPBP2	68.5643	231.912	428.069	129.985	63.5457	25.189	3.29391	1.7198	0.0391878	0.239801
ARNT2	0	52.4563	31.4179	0	0	0	107.113	6.74298	0.0392154	0.239801
CTB-52I2.4	0	42.7933	40.5815	0	0	0	106.575	6.73573	0.0392166	0.239801
ABHD17B	23.8485	44.1737	53.6723	18.9561	9.77627	0	3.86588	1.9508	0.0392584	0.239918
PSMD5-AS1	11.9242	0	0	16.2481	14.6644	16.7926	-6.54349	-2.71006	0.0393638	0.240129
PLCG2	2.98106	132.521	71.9994	18.9561	14.6644	16.7926	4.08734	2.03116	0.0393551	0.240129
CEP95	11.9242	8.28257	6.5454	32.4962	24.4407	33.5853	-3.64444	-1.8657	0.039384	0.240129
DKFZP761J1410	50.678	35.8911	20.9453	94.7806	68.4339	130.143	-2.916	-1.54399	0.0393177	0.240129
ZNF608	0	71.7823	81.163	24.3721	0	4.19816	5.01681	2.32677	0.0394147	0.240177
SMG7	83.4696	401.705	401.888	148.941	58.6576	58.7742	3.29216	1.71903	0.0396246	0.240593
RNF20	35.7727	138.043	170.18	29.7882	58.6576	25.189	3.11371	1.63864	0.0396426	0.240593
FAM78A	8.94317	0	0	13.5401	4.88813	25.189	-6.6614	-2.73583	0.0395243	0.240593
ZDHHC24	32.7916	11.0434	5.23632	27.0802	29.3288	121.747	-3.79781	-1.92517	0.0395311	0.240593
MAP6	11.9242	26.2281	32.727	0	0	0	99.4493	6.63589	0.0395926	0.240593
NOSIP	38.7537	19.326	14.3999	67.7004	24.4407	142.737	-3.3674	-1.75163	0.0396094	0.240593
GNL3L	5.96211	64.8801	44.5087	13.5401	4.88813	8.39632	4.11588	2.0412	0.0395998	0.240593
SERBP1	259.352	686.073	730.467	143.525	141.756	218.304	3.34524	1.74211	0.0399427	0.241718
SESTD1	8.94317	88.3474	113.89	13.5401	34.2169	8.39632	3.86776	1.9515	0.0399157	0.241718
TMEM184C	11.9242	0	2.61816	32.4962	9.77627	16.7926	-5.27105	-2.39809	0.0398955	0.241718
NDUFA11	83.4696	2.76086	1.30908	89.3645	58.6576	218.304	-4.26716	-2.09328	0.0399097	0.241718
C19orf66	20.8674	0	0	21.6641	39.1051	41.9816	-5.39244	-2.43094	0.0399374	0.241718
NOL9	11.9242	1.38043	2.61816	18.9561	19.5525	16.7926	-4.534	-2.18079	0.0400065	0.241828
RAB10	89.4317	321.64	353.452	121.861	73.322	50.3779	3.08629	1.62587	0.0400011	0.241828
TNPO3	53.659	260.901	257.889	89.3645	68.4339	12.5945	3.33457	1.7375	0.0400358	0.24186
IFI27L2	23.8485	1.38043	1.30908	27.0802	9.77627	83.9632	-4.90203	-2.29338	0.0400639	0.24186
SAT2	56.6401	0	0	59.5764	68.4339	138.539	-4.79152	-2.26048	0.0400807	0.24186
PAK1	35.7727	24.8477	35.3452	2.70802	9.77627	12.5945	4.12029	2.04275	0.0401325	0.241896
MAVS	38.7537	0	0	54.1603	68.4339	50.3779	-4.62428	-2.20923	0.040122	0.241896
FBXO9	17.8863	2.76086	11.7817	51.4523	43.9932	16.7926	-3.79531	-1.92422	0.0402968	0.242747
ALDOAP1	0	38.652	43.1997	0	0	0	104.695	6.71005	0.0403858	0.243006
FBXW11	38.7537	227.771	263.125	64.9924	68.4339	20.9908	3.43048	1.77841	0.0403789	0.243006
KIAA1324	8.94317	0	0	5.41603	19.5525	20.9908	-6.58917	-2.7201	0.0405931	0.243459
ADAR	143.091	46.9346	36.6543	251.846	268.847	142.737	-3.01132	-1.59039	0.0405996	0.243459
ANTXR2	56.6401	225.01	231.707	70.4084	43.9932	41.9816	3.25454	1.70245	0.040511	0.243459
TCOF1	38.7537	2.76086	6.5454	37.9122	48.8813	75.5669	-3.64705	-1.86673	0.040542	0.243459
NQO2	20.8674	1.38043	0	43.3283	4.88813	58.7742	-5.19149	-2.37615	0.0405459	0.243459
KRIT1	14.9053	115.956	117.817	32.4962	19.5525	20.9908	3.36925	1.75243	0.0405771	0.243459
ZRANB2	80.4885	140.804	151.853	62.2844	43.9932	16.7926	2.95107	1.56124	0.0406915	0.243613
CEPT1	14.9053	102.152	92.9447	13.5401	34.2169	12.5945	3.62256	1.85701	0.0407193	0.243613
SH3PXD2A	23.8485	491.433	390.106	108.321	87.9864	54.5761	3.60149	1.84859	0.0407371	0.243613
CCND2	0	44.1737	36.6543	0	0	0	103.407	6.69219	0.0407167	0.243613
DLG4	32.7916	226.39	192.435	46.0363	43.9932	46.1798	3.33239	1.73656	0.0407407	0.243613
EBF4	0	24.8477	22.2544	2.70802	0	0	11.6539	3.54274	0.0408106	0.243893
TBC1D31	2.98106	20.7064	35.3452	0	9.77627	0	7.00578	2.80854	0.0408817	0.244166
EPPK1	2.98106	51.0759	23.5634	0	0	0	100.198	6.64671	0.0409203	0.244166
KPNB1	262.333	895.898	1025.01	276.218	205.302	146.936	3.46629	1.79339	0.0409258	0.244166
POR	104.337	309.216	505.305	108.321	73.322	109.152	3.15703	1.65857	0.0409556	0.244205
NRARP	92.4128	71.7823	32.727	10.8321	24.4407	25.189	3.31716	1.72995	0.0410054	0.244365
NPIPA1	35.7727	0	2.61816	59.5764	58.6576	33.5853	-4.19582	-2.06895	0.0411016	0.2448
DAAM1	23.8485	64.8801	94.2538	18.9561	29.3288	4.19816	3.57057	1.83615	0.041128	0.244818
ZNF140	8.94317	0	0	10.8321	14.6644	12.5945	-6.49204	-2.69867	0.0412476	0.245392
BTBD6	86.4507	2.76086	2.61816	70.4084	83.0983	205.71	-3.99334	-1.9976	0.0413071	0.245607
RP11-640M9.2	14.9053	0	0	48.7443	43.9932	0	-6.54202	-2.70974	0.041408	0.24585
CDC73	26.8295	106.293	116.508	29.7882	34.2169	16.7926	3.13331	1.64769	0.0414412	0.24585
ARL8B	56.6401	317.499	291.925	78.5325	92.8745	46.1798	3.07693	1.62149	0.0414277	0.24585
ACACB	0	48.315	31.4179	0	0	0	102.003	6.67246	0.0414256	0.24585
QPCT	14.9053	1.38043	0	29.7882	14.6644	25.189	-5.51711	-2.46391	0.0415685	0.245945
SLC12A7	50.678	31.7499	20.9453	70.4084	136.868	88.1614	-2.95765	-1.56445	0.041503	0.245945
HSDL1	41.7348	2.76086	5.23632	40.6202	53.7695	83.9632	-3.84003	-1.94112	0.0415375	0.245945
RNF138	14.9053	9.663	17.018	2.70802	0	0	9.34251	3.22381	0.0415268	0.245945
HCN2	14.9053	9.663	17.018	2.70802	0	0	9.34251	3.22381	0.0415737	0.245945
C12orf76	0	2.76086	2.61816	10.8321	14.6644	12.5945	-5.06346	-2.34012	0.0416072	0.246005
PI4K2A_1	0	28.989	49.7451	0	0	0	100.789	6.65519	0.0416381	0.246022
CTDSP2	68.5643	63.4997	53.6723	238.305	180.861	121.747	-3.0134	-1.59139	0.0416567	0.246022
PKMP1	0	37.2716	40.5815	0	0	0	99.7465	6.64019	0.041988	0.247035
POTEE	0	40.0324	37.9633	0	0	0	99.9171	6.64266	0.0420409	0.247035
ATP6V1A	47.6969	300.933	426.76	102.905	97.7627	33.5853	3.30649	1.7253	0.0419919	0.247035
TBC1D14	8.94317	51.0759	34.0361	64.9924	102.651	138.539	-3.03286	-1.60068	0.0420383	0.247035
RSBN1L	0	55.2171	69.3813	5.41603	19.5525	0	5.07627	2.34377	0.0420625	0.247035
AAAS	47.6969	86.967	56.2905	21.6641	19.5525	20.9908	3.11449	1.639	0.041867	0.247035
LCP1	0	40.0324	37.9633	0	0	0	99.9171	6.64266	0.0420376	0.247035
KLHL11	8.94317	35.8911	18.3271	2.70802	9.77627	0	5.59415	2.48392	0.0420291	0.247035
U2AF2	149.053	541.128	633.595	119.153	127.091	146.936	3.38299	1.7583	0.0418964	0.247035
SYNJ1	11.9242	62.1193	65.454	21.6641	9.77627	4.19816	3.70941	1.89119	0.0420462	0.247035
TIGD2	2.98106	15.1847	22.2544	2.70802	0	0	10.215	3.35261	0.0421135	0.247112
HMHA1	20.8674	0	0	37.9122	19.5525	41.9816	-5.25929	-2.39487	0.0421225	0.247112
HERC2	83.4696	513.519	632.286	111.029	185.749	41.9816	3.64239	1.86489	0.0422078	0.247475
RASD1	608.136	0	0	32.4962	39.1051	20.9908	6.51183	2.70306	0.0422463	0.247564
FAM69A	2.98106	23.4673	15.709	0	4.88813	0	10.2084	3.35168	0.0423427	0.247853
ZNF702P	23.8485	0	0	27.0802	78.2101	16.7926	-5.39752	-2.4323	0.0423196	0.247853
FAM188A	17.8863	46.9346	52.3632	8.12405	19.5525	8.39632	3.63682	1.86268	0.0423775	0.247919
PAPOLA	152.034	423.792	447.706	113.737	146.644	71.3687	3.10932	1.6366	0.0424579	0.248252
KIAA1430	5.96211	5.52171	5.23632	29.7882	43.9932	4.19816	-4.50217	-2.17062	0.0424901	0.248302
TTC14	14.9053	113.195	129.599	27.0802	39.1051	12.5945	3.31335	1.72829	0.0425494	0.248511
HOXD8	14.9053	92.4887	32.727	18.9561	9.77627	8.39632	3.64131	1.86446	0.0425932	0.248629
TMED5	53.659	179.456	140.072	62.2844	34.2169	25.189	3.00322	1.58651	0.0426485	0.248677
KCTD2	41.7348	16.5651	14.3999	62.2844	68.4339	58.7742	-3.05997	-1.61352	0.0426342	0.248677
HDAC11	8.94317	0	0	2.70802	19.5525	29.3871	-6.72357	-2.74923	0.0428409	0.24911
GSK3B	65.5833	262.281	349.525	78.5325	92.8745	58.7742	2.96354	1.56732	0.0428052	0.24911
DAXX	38.7537	13.8043	20.9453	59.5764	63.5457	79.7651	-3.07742	-1.62172	0.04277	0.24911
PDE7A	5.96211	24.8477	43.1997	8.12405	4.88813	0	5.19981	2.37846	0.0428257	0.24911
SNRNP35	2.98106	1.38043	3.92724	8.12405	19.5525	20.9908	-4.96117	-2.31068	0.0428254	0.24911
HS1BP3	44.7159	13.8043	15.709	75.8245	43.9932	88.1614	-3.13358	-1.64781	0.04296	0.249665
SLC48A1	23.8485	247.097	290.616	51.4523	43.9932	71.3687	3.37446	1.75466	0.043041	0.249998
TEC	0	30.3694	45.8178	0	0	0	97.6594	6.60969	0.0431148	0.250289
SETD1A	8.94317	138.043	183.271	59.5764	14.6644	12.5945	3.70603	1.88987	0.0431959	0.250622
NMRK1	26.8295	4.14129	0	24.3721	53.7695	50.3779	-4.48124	-2.1639	0.0432324	0.250673
EPS8	14.9053	151.847	251.343	51.4523	58.6576	4.19816	3.64968	1.86777	0.0432523	0.250673
TRIM54	0	49.6954	26.1816	0	0	0	97.1665	6.60239	0.0434286	0.250943
KANSL1L	23.8485	34.5107	51.0541	13.5401	9.77627	8.39632	3.44879	1.78609	0.0433748	0.250943
PDS5A	74.5264	491.433	523.632	121.861	151.532	41.9816	3.46061	1.79103	0.0434415	0.250943
PHF10	17.8863	124.239	201.598	21.6641	39.1051	46.1798	3.27063	1.70957	0.0434398	0.250943
NACAP1	0	26.2281	49.7451	0	0	0	97.3473	6.60507	0.0433798	0.250943
KLHL15	74.5264	2.76086	6.5454	0	0	0	103.14	6.68847	0.0433724	0.250943
EPHB2	95.3938	2.76086	0	111.029	141.756	159.53	-4.25856	-2.09037	0.0436892	0.250993
ZNF804A	5.96211	0	0	27.0802	9.77627	0	-7.55648	-2.91771	0.0437834	0.250993
SLC25A26	5.96211	2.76086	0	13.5401	4.88813	20.9908	-5.55544	-2.4739	0.043504	0.250993
COL8A1	53.659	2.76086	1.30908	51.4523	151.532	37.7834	-4.29821	-2.10374	0.0436301	0.250993
PGM2	44.7159	70.4019	83.7812	21.6641	29.3288	16.7926	3.15026	1.65547	0.0437806	0.250993
CBR4	11.9242	2.76086	1.30908	24.3721	14.6644	12.5945	-4.53226	-2.18023	0.043628	0.250993
AKR1B1	193.769	63.4997	56.2905	227.473	239.519	482.788	-3.08117	-1.62348	0.0437784	0.250993
CPSF6	71.5454	198.782	289.307	62.2844	68.4339	58.7742	2.98466	1.57757	0.0436656	0.250993
P2RX7	0	15.1847	31.4179	2.70802	0	0	11.568	3.53207	0.0437051	0.250993
MTRF1	11.9242	0	0	16.2481	24.4407	12.5945	-6.09359	-2.60729	0.0434811	0.250993
VPS36	11.9242	104.913	74.6176	24.3721	24.4407	0	3.87394	1.9538	0.0436212	0.250993
IREB2	38.7537	136.662	157.09	32.4962	63.5457	8.39632	3.24639	1.69884	0.0437533	0.250993
TP53I13	17.8863	4.14129	3.92724	27.0802	14.6644	46.1798	-4.09133	-2.03257	0.0437288	0.250993
JAG1_1	250.409	487.291	687.267	257.262	92.8745	29.3871	3.71208	1.89223	0.0436552	0.250993
GEM	50.678	8.28257	31.4179	13.5401	0	0	5.23563	2.38836	0.0438191	0.251061
D2HGDH	14.9053	0	1.30908	16.2481	19.5525	33.5853	-5.28473	-2.40183	0.0440152	0.251213
ACAP2	29.8106	149.086	129.599	40.6202	43.9932	16.7926	3.05859	1.61287	0.0439525	0.251213
FBXL5	50.678	179.456	276.216	35.2042	97.7627	16.7926	3.44319	1.78374	0.0441076	0.251213
AHRR	50.678	13.8043	6.5454	102.905	68.4339	46.1798	-3.29762	-1.72142	0.0440056	0.251213
ETF1	146.072	490.052	573.377	146.233	146.644	71.3687	3.32298	1.73248	0.0440893	0.251213
MAN1B1	104.337	27.6086	27.4907	113.737	92.8745	256.088	-2.98573	-1.57808	0.0440478	0.251213
PDZD8	26.8295	125.619	137.453	29.7882	53.7695	8.39632	3.21029	1.6827	0.0440331	0.251213
MMP15	8.94317	70.4019	36.6543	10.8321	0	16.7926	4.05511	2.01974	0.0439509	0.251213
C20orf96	8.94317	0	0	10.8321	19.5525	8.39632	-6.49231	-2.69873	0.0440793	0.251213
DHX35	8.94317	30.3694	32.727	10.8321	0	0	5.16655	2.3692	0.0438823	0.251213
PPP2R3B	14.9053	1.38043	0	27.0802	9.77627	37.7834	-5.49817	-2.45895	0.0439141	0.251213
RRS1	14.9053	56.5976	58.9086	10.8321	9.77627	16.7926	3.614	1.8536	0.0442743	0.251915
PTPRA	110.299	390.661	488.287	102.905	97.7627	121.747	3.08234	1.62403	0.0443011	0.251915
ZFX	23.8485	59.3584	71.9994	18.9561	19.5525	8.39632	3.36441	1.75035	0.0443024	0.251915
NCK1	17.8863	98.0104	77.2358	27.0802	19.5525	8.39632	3.44834	1.7859	0.0444684	0.25245
PTGS1	23.8485	2.76086	2.61816	48.7443	39.1051	16.7926	-4.13055	-2.04633	0.0444504	0.25245
ADAT1	2.98106	1.38043	2.61816	21.6641	19.5525	0	-5.88809	-2.5578	0.0444565	0.25245
TNKS	44.7159	164.271	221.235	70.4084	39.1051	25.189	3.14603	1.65353	0.0445407	0.252453
PPP2R5E	29.8106	125.619	149.235	32.4962	53.7695	12.5945	3.13859	1.65012	0.0445284	0.252453
ADAMTS10	0	52.4563	22.2544	0	0	0	95.6465	6.57964	0.0445404	0.252453
ERLIN2	44.7159	46.9346	57.5995	21.6641	9.77627	12.5945	3.15048	1.65557	0.0446168	0.252531
MGEA5	175.882	618.432	769.739	200.393	185.749	71.3687	3.41494	1.77186	0.0446263	0.252531
ZNF397	0	22.0869	24.8725	0	4.88813	0	10.4103	3.37994	0.0445892	0.252531
PTCH1	0	34.5107	39.2724	0	0	0	94.7134	6.5655	0.0447073	0.252677
ARHGAP32	11.9242	0	0	18.9561	29.3288	8.39632	-5.90444	-2.5618	0.044724	0.252677
COLEC12	26.8295	0	0	13.5401	87.9864	37.7834	-5.39775	-2.43236	0.0446809	0.252677
GBP6	0	57.978	17.018	0	0	0	95.8659	6.58295	0.0447481	0.252678
GPD2	32.7916	59.3584	74.6176	16.2481	29.3288	8.39632	3.32866	1.73494	0.0447951	0.252808
GLYCTK	8.94317	0	0	10.8321	4.88813	29.3871	-6.41135	-2.68063	0.0448389	0.25292
GTF3C5	41.7348	13.8043	11.7817	62.2844	39.1051	83.9632	-3.06912	-1.61783	0.0449512	0.253283
INPP5F	41.7348	95.2496	96.872	29.7882	39.1051	8.39632	3.09186	1.62847	0.0449288	0.253283
KDM2B	8.94317	89.7279	71.9994	16.2481	24.4407	8.39632	3.54344	1.82515	0.045027	0.253439
LA16c-390E6.5	11.9242	0	0	0	0	100.756	-8.43252	-3.07596	0.0450058	0.253439
AC108039.1	0	40.0324	32.727	0	0	0	93.4236	6.54571	0.0450817	0.253477
XPO4	26.8295	59.3584	52.3632	13.5401	24.4407	8.39632	3.32311	1.73253	0.045069	0.253477
IGF2	26.8295	30.3694	14.3999	0	0	0	88.2346	6.46327	0.0451214	0.253565
CRISPLD2	56.6401	8.28257	11.7817	0	0	0	92.8391	6.53666	0.0453241	0.254568
ZBTB11	26.8295	53.8367	92.9447	18.9561	29.3288	4.19816	3.39356	1.7628	0.0453567	0.254616
AKNA	14.9053	0	0	18.9561	14.6644	37.7834	-5.62135	-2.49092	0.0453832	0.254629
KITLG	157.996	226.39	260.507	140.817	48.8813	12.5945	3.10945	1.63666	0.0454632	0.254942
TMEM185B	32.7916	38.652	34.0361	16.2481	4.88813	4.19816	3.55195	1.82861	0.0456393	0.255116
PKD2	20.8674	91.1083	106.036	35.2042	19.5525	8.39632	3.35348	1.74566	0.0456193	0.255116
NDST1	92.4128	107.673	108.654	300.59	376.386	235.097	-2.86216	-1.51711	0.045603	0.255116
AHR	92.4128	12.4239	10.4726	140.817	200.413	37.7834	-3.3679	-1.75185	0.0455876	0.255116
ZKSCAN5	14.9053	4.14129	2.61816	21.6641	29.3288	25.189	-4.30857	-2.10721	0.0456018	0.255116
TRAPPC5	35.7727	22.0869	22.2544	48.7443	43.9932	146.936	-3.04018	-1.60416	0.0455533	0.255116
MTRNR2L6	0	5.52171	70.6903	0	0	0	97.1076	6.60151	0.0457442	0.255537
ESF1	5.96211	57.978	51.0541	8.12405	14.6644	8.39632	3.84665	1.9436	0.0457631	0.255537
FAM98A	65.5833	144.945	146.617	43.3283	68.4339	4.19816	3.11104	1.6374	0.0459225	0.256291
SERTAD2	29.8106	59.3584	125.672	27.0802	29.3288	8.39632	3.32204	1.73207	0.0462171	0.256359
SEC62	77.5075	240.195	277.525	75.8245	87.9864	37.7834	2.97216	1.57151	0.0460521	0.256359
SERBP1P6	5.96211	26.2281	34.0361	0	0	0	88.381	6.46566	0.0459882	0.256359
PELO	20.8674	11.0434	13.0908	59.5764	14.6644	50.3779	-3.14656	-1.65378	0.0461061	0.256359
NUS1	26.8295	150.467	133.526	62.2844	24.4407	4.19816	3.32414	1.73298	0.0462516	0.256359
WAPAL	44.7159	204.303	200.289	64.9924	48.8813	25.189	3.20825	1.68179	0.0462131	0.256359
MYOF	283.2	1693.79	1751.55	433.283	503.478	113.35	3.55114	1.82828	0.0461954	0.256359
PHRF1	65.5833	27.6086	34.0361	129.985	78.2101	100.756	-2.68525	-1.42505	0.0460148	0.256359
LARP6	41.7348	0	0	94.7806	29.3288	67.1706	-4.73258	-2.24263	0.0462739	0.256359
ENTHD2	32.7916	4.14129	5.23632	59.5764	24.4407	50.3779	-3.58817	-1.84325	0.0462738	0.256359
ENOSF1	14.9053	0	0	10.8321	39.1051	20.9908	-5.39382	-2.43131	0.0462178	0.256359
PTPRS	8.94317	140.804	119.126	27.0802	24.4407	29.3871	3.33517	1.73776	0.0462749	0.256359
ZNF358	29.8106	13.8043	19.6362	32.4962	29.3288	142.737	-3.2718	-1.71009	0.0459827	0.256359
C21orf33	20.8674	2.76086	7.85448	27.0802	19.5525	67.1706	-3.97595	-1.9913	0.0461427	0.256359
FBXO22	47.6969	89.7279	86.3993	29.7882	14.6644	29.3871	3.04454	1.60623	0.0463203	0.256476
ISYNA1	5.96211	1.38043	0	5.41603	4.88813	29.3871	-6.19951	-2.63215	0.0463913	0.256734
USP39	38.7537	100.771	137.453	24.3721	34.2169	41.9816	2.85855	1.51528	0.046577	0.257087
MMRN2	226.56	13.8043	7.85448	197.685	356.834	361.042	-3.72192	-1.89605	0.0464838	0.257087
TLDC1	23.8485	0	1.30908	51.4523	29.3288	25.189	-4.68377	-2.22767	0.0465619	0.257087
A1BG-AS1	8.94317	0	0	13.5401	4.88813	16.7926	-6.49046	-2.69832	0.0465268	0.257087
MT-ATP6	1645.54	57.978	31.4179	2079.76	2414.74	2716.21	-4.16057	-2.05678	0.0465477	0.257087
MVB12B	0	30.3694	36.6543	2.70802	4.88813	4.19816	5.76616	2.52761	0.0466635	0.257296
NXF1	1299.74	281.607	316.797	224.765	171.085	163.728	3.36952	1.75255	0.0466408	0.257296
SCAPER	5.96211	23.4673	31.4179	8.12405	0	0	5.75087	2.52378	0.0467153	0.257447
STARD7	137.129	51.0759	36.6543	129.985	342.169	193.115	-3.00786	-1.58874	0.0467766	0.25765
UROS	26.8295	0	0	27.0802	9.77627	100.756	-5.33107	-2.41443	0.04681	0.257699
FTLP1	0	37.2716	32.727	0	0	0	90.0237	6.49223	0.0468849	0.257977
CSNK1A1L	0	34.5107	35.3452	0	0	0	89.8611	6.48962	0.0469462	0.25818
CEBPD	5.96211	56.5976	35.3452	2.70802	14.6644	8.39632	4.14578	2.05164	0.0469867	0.258268
NLRX1	14.9053	0	0	10.8321	24.4407	33.5853	-5.31029	-2.40879	0.047047	0.258323
CYB5D2	26.8295	0	0	21.6641	29.3288	79.7651	-5.1233	-2.35707	0.0470261	0.258323
C17orf62	56.6401	1.38043	17.018	94.7806	53.7695	109.152	-3.56348	-1.83329	0.0470703	0.258323
SH3PXD2B	86.4507	11.0434	2.61816	129.985	161.308	54.5761	-3.54265	-1.82483	0.0470976	0.258339
YAF2	2.98106	33.1303	39.2724	8.12405	4.88813	0	5.31228	2.40933	0.0471328	0.258356
RPS3AP4	0	27.6086	41.8906	0	0	0	89.3886	6.48202	0.0471497	0.258356
FBXO33	23.8485	66.2606	132.217	24.3721	19.5525	25.189	3.23599	1.69421	0.0471995	0.258495
DRAM2	20.8674	46.9346	28.7998	2.70802	9.77627	16.7926	3.76344	1.91205	0.0472647	0.258504
PNMA2	29.8106	0	0	56.8683	53.7695	25.189	-4.80303	-2.26394	0.0472644	0.258504
GATA3	14.9053	0	2.61816	18.9561	34.2169	16.7926	-4.92018	-2.29871	0.0472748	0.258504
COIL	8.94317	4.14129	3.92724	27.0802	14.6644	20.9908	-4.28894	-2.10062	0.0473587	0.2588
RALGAPB	68.5643	387.9	400.579	119.153	112.427	33.5853	3.22786	1.69058	0.047378	0.2588
SRP72	62.6022	433.455	445.087	116.445	122.203	54.5761	3.21304	1.68394	0.0476334	0.259264
SP4	2.98106	12.4239	24.8725	0	4.88813	0	9.57148	3.25874	0.0476349	0.259264
CCDC136	8.94317	19.326	31.4179	8.12405	0	0	5.58419	2.48135	0.0476036	0.259264
NPDC1	172.901	52.4563	48.436	178.729	127.091	516.374	-3.04049	-1.60431	0.0475693	0.259264
CIT	5.96211	20.7064	10.4726	0	4.88813	0	9.07822	3.18241	0.0475782	0.259264
TAF15	80.4885	280.227	438.542	78.5325	92.8745	100.756	2.96027	1.56573	0.0475233	0.259264
CIC	68.5643	324.401	315.488	92.0726	87.9864	62.9724	2.92348	1.54769	0.0476277	0.259264
CSTF2	17.8863	71.7823	45.8178	10.8321	9.77627	20.9908	3.37575	1.75521	0.047724	0.259615
RP11-159H3.1	0	33.1303	35.3452	0	0	0	88.1582	6.46202	0.0477633	0.259694
GSTM5	0	48.315	20.9453	0	0	0	88.9023	6.47415	0.0477969	0.259743
STIM2	5.96211	164.271	183.271	21.6641	43.9932	37.7834	3.45659	1.78935	0.0479586	0.26038
SLC31A1	17.8863	20.7064	17.018	108.321	39.1051	20.9908	-3.10721	-1.63562	0.0479635	0.26038
CUL1	65.5833	249.858	312.87	83.9485	73.322	58.7742	2.91364	1.54282	0.0480134	0.260474
DHRSX	26.8295	0	0	29.7882	29.3288	67.1706	-4.98749	-2.31831	0.0480302	0.260474
C10orf118	5.96211	44.1737	57.5995	8.12405	19.5525	0	4.03928	2.0141	0.0481	0.260687
IKZF5	5.96211	24.8477	41.8906	5.41603	9.77627	0	4.92841	2.30112	0.0481188	0.260687
SMPD1	220.598	51.0759	45.8178	259.97	224.854	495.383	-3.135	-1.64846	0.0481805	0.260887
OSBPL9	50.678	198.782	227.78	48.7443	78.2101	25.189	3.18202	1.66995	0.0483628	0.260948
PLA2G12A	5.96211	2.76086	2.61816	10.8321	14.6644	25.189	-4.54413	-2.184	0.0483297	0.260948
AGFG2	8.94317	6.90214	10.4726	13.5401	39.1051	50.3779	-3.58271	-1.84105	0.0483631	0.260948
PUS7	23.8485	51.0759	36.6543	2.70802	29.3288	4.19816	3.67653	1.87834	0.048415	0.260948
PURG	0	24.8477	19.6362	2.70802	0	0	11.032	3.46362	0.0484337	0.260948
TAF1L	0	26.2281	18.3271	2.70802	0	0	11.0487	3.4658	0.0484392	0.260948
PDS5B	11.9242	161.51	136.144	18.9561	48.8813	29.3871	3.2539	1.70217	0.0483386	0.260948
CKB	8.94317	16.5651	11.7817	0	0	4.19816	8.97239	3.16549	0.048392	0.260948
MPG	59.6211	1.38043	2.61816	35.2042	39.1051	184.719	-4.17361	-2.0613	0.0482323	0.260948
EIF4ENIF1	11.9242	114.576	120.435	29.7882	29.3288	16.7926	3.26149	1.70553	0.048312	0.260948
ARL15	2.98106	4.14129	3.92724	2.70802	48.8813	12.5945	-5.00225	-2.32258	0.0485468	0.261128
KIAA1244	8.94317	0	0	51.4523	4.88813	0	-6.8486	-2.77581	0.048504	0.261128
NUP188	89.4317	205.684	236.944	56.8683	87.9864	37.7834	2.97925	1.57495	0.0485355	0.261128
PLCD3	35.7727	16.5651	32.727	48.7443	97.7627	109.152	-2.99171	-1.58097	0.0485978	0.261269
GPX1	679.681	107.673	94.2538	679.712	469.261	2103.28	-3.70116	-1.88798	0.0486511	0.261289
C15orf59	0	24.8477	20.9453	0	4.88813	0	10.1777	3.34734	0.0486339	0.261289
USP6NL	8.94317	75.9236	58.9086	27.0802	4.88813	4.19816	3.69647	1.88615	0.0487229	0.261542
POM121C	68.5643	9.663	19.6362	127.277	83.0983	71.3687	-3.05167	-1.6096	0.0489212	0.261674
PON3	0	24.8477	20.9453	0	4.88813	0	10.1777	3.34734	0.0488344	0.261674
MYBL1	0	23.4673	22.2544	0	4.88813	0	10.1738	3.34679	0.0488998	0.261674
PPME1	68.5643	147.706	196.362	46.0363	53.7695	46.1798	2.89076	1.53145	0.0489061	0.261674
FAM219B	47.6969	2.76086	3.92724	43.3283	78.2101	71.3687	-3.74806	-1.90614	0.0488574	0.261674
RP11-138I1.4	14.9053	17.9456	48.436	0	0	16.7926	5.07455	2.34328	0.0488439	0.261674
IGBP1	29.8106	34.5107	19.6362	62.2844	43.9932	146.936	-3.0091	-1.58933	0.0488383	0.261674
NME7	5.96211	4.14129	0	16.2481	9.77627	16.7926	-4.95699	-2.30947	0.0489866	0.261728
TNIP2	53.659	5.52171	1.30908	43.3283	87.9864	83.9632	-3.70457	-1.88931	0.0490057	0.261728
CHN2	8.94317	41.4129	39.2724	5.41603	0	16.7926	4.08081	2.02886	0.0490046	0.261728
WASH6P	11.9242	0	0	10.8321	9.77627	37.7834	-5.78248	-2.53169	0.0491342	0.262281
FAM200B	8.94317	0	0	5.41603	19.5525	16.7926	-6.07692	-2.60334	0.0493243	0.26303
HSF2	5.96211	46.9346	66.7631	5.41603	24.4407	0	4.21736	2.07634	0.0493234	0.26303
MMP1	8314.17	19.326	17.018	19958.1	12122.6	13883.3	-5.5048	-2.46069	0.0494103	0.263153
IDH3A	32.7916	78.6844	81.163	24.3721	29.3288	8.39632	3.17506	1.66678	0.0493813	0.263153
BEAN1	2.98106	27.6086	32.727	0	0	0	83.3467	6.38105	0.0494222	0.263153
COMMD6	44.7159	2.76086	1.30908	35.2042	58.6576	92.3595	-4.00437	-2.00157	0.0494977	0.263422
COMMD1	32.7916	52.4563	83.7812	21.6641	9.77627	20.9908	3.17611	1.66726	0.0496151	0.26378
PCDH12	5.96211	80.0649	19.6362	32.4962	107.539	218.304	-3.29954	-1.72226	0.0496068	0.26378
MAGI3	11.9242	28.989	74.6176	10.8321	19.5525	0	3.88228	1.9569	0.0497586	0.264144
DHX9	157.996	367.194	358.688	97.4886	131.98	79.7651	2.90327	1.53768	0.0497499	0.264144
TECPR2	23.8485	12.4239	10.4726	56.8683	34.2169	29.3871	-3.09255	-1.6288	0.0497359	0.264144
HIPK3	44.7159	336.825	358.688	102.905	107.539	8.39632	3.37677	1.75564	0.0498014	0.264238
TIMM10B_2	0	42.7933	23.5634	0	0	0	85.4018	6.41619	0.0498484	0.264329
RRAD	83.4696	0	0	0	0	0	103.962	6.69991	0.0498686	0.264329
DDX5	1353.4	2930.65	3116.92	806.989	1192.7	478.59	2.99121	1.58073	0.0499141	0.264437
FAM111A	29.8106	0	9.16356	29.7882	102.651	20.9908	-4.05434	-2.01947	0.0499936	0.264725
SRPK1	35.7727	167.032	171.49	35.2042	68.4339	25.189	2.97299	1.57192	0.0501387	0.264961
PRKAR2B	35.7727	164.271	183.271	83.9485	24.4407	4.19816	3.31725	1.72999	0.0500872	0.264961
TLE4	38.7537	45.5541	62.8359	27.0802	4.88813	8.39632	3.1791	1.66862	0.050114	0.264961
CLCN7	65.5833	81.4453	79.8539	254.554	210.19	159.53	-2.74771	-1.45823	0.0501214	0.264961
HSPG2	3526.59	339.585	138.763	5058.57	7459.29	2523.09	-3.75781	-1.90989	0.0502008	0.265024
MSL2	2.98106	92.4887	136.144	18.9561	29.3288	16.7926	3.59269	1.84507	0.0501796	0.265024
ATP13A1	32.7916	263.662	240.871	43.3283	29.3288	92.3595	3.26618	1.7076	0.0503577	0.26572
[truncated: 55,774 more rows]

## Sheet: Sheet4
Name	CPM	CPM	CPM	CPM	CPM	CPM	Fold change	Log fold change	P-value	FDR p-value
NEO1	0	0	0	0	1274.14	1022.39	2863.75	11.4837	0.000524611	0.0450406
CPE	2.70802	0	0	0	973.202	870.539	461.144	8.84907	1.15388e-06	0.000993909
IGFBP3	5.41603	0	0	2.98106	1993.34	1206.97	457.069	8.83627	1.48517e-08	7.83278e-05
HSPA1L	2.70802	0	0	20.8674	288.51	754.03	254.336	7.99059	1.22495e-06	0.000993909
UCP2	2.70802	0	4.19816	8.94317	902.8	822.103	217.496	7.76484	1.0433e-07	0.000220094
FBLN5	0	4.88813	0	2.98106	687.453	349.525	207.926	7.69993	1.6937e-06	0.00111657
ARC	0	4.88813	0	801.904	0	1.30908	152.475	7.25243	6.16852e-05	0.0118301
RP11-466P24.2	0	14.6644	0	0	786.844	1108.79	128.889	7.00999	7.57057e-07	0.000993909
SEMA3A	2.70802	0	0	5.96211	168.412	108.654	67.5996	6.07894	0.000191122	0.0231719
CRYAB	8.12405	19.5525	16.7926	41.7348	1051.89	1747.62	64.0156	6.00035	3.45315e-08	0.000107638
SLC25A4	10.8321	0	0	20.8674	393.422	352.143	57.6841	5.8501	7.8246e-07	0.000993909
ID2	5.41603	0	0	387.537	6.90214	5.23632	56.9278	5.83106	0.000128614	0.0178502
CDH11	5.41603	4.88813	0	8.94317	285.749	319.416	53.9108	5.7525	5.3696e-06	0.00220777
ARHGEF5	2.70802	0	0	0	114.576	100.799	52.8669	5.72429	0.000685482	0.0479559
PDIA3P1	8.12405	0	16.7926	8.94317	630.856	602.177	47.7485	5.57738	9.79033e-07	0.000993909
PHGDH	5.41603	9.77627	4.19816	0	365.814	532.796	45.1806	5.49763	3.79977e-06	0.00190857
N4BP3	0	4.88813	0	5.96211	117.336	74.6176	41.8581	5.38744	0.000535049	0.0450804
EPB41L1	0	9.77627	0	8.94317	182.217	167.562	39.0339	5.28666	3.787e-05	0.00813599
GPR124	5.41603	4.88813	0	0	252.618	181.962	38.4839	5.26618	3.34605e-05	0.00771209
SEMA6D	5.41603	0	0	0	132.521	136.144	38.1143	5.25226	0.000248272	0.028465
HSPA6	70.4084	0	0	2402.73	85.5866	179.344	36.7512	5.19972	2.17483e-05	0.00573504
SMO	2.70802	0	4.19816	2.98106	154.608	133.526	36.6281	5.19488	0.000112704	0.0160649
NID1	24.3721	73.322	41.9816	11.9242	2519.28	2538.31	36.3183	5.18263	2.53041e-06	0.00157005
SORBS1	10.8321	4.88813	0	44.7159	248.477	273.598	31.6025	4.98197	3.17709e-06	0.00181264
NPR1	5.41603	4.88813	4.19816	2.98106	292.651	185.889	31.4088	4.9731	1.99002e-05	0.00552386
HMGA2	27.0802	4.88813	8.39632	119.242	499.715	727.849	30.6848	4.93945	3.85059e-07	0.000676934
FST	16.2481	0	4.19816	56.6401	339.585	260.507	27.5963	4.7864	3.26509e-06	0.00181264
HPRT1	5.41603	4.88813	4.19816	44.7159	172.554	196.362	27.0155	4.75572	4.79535e-06	0.00220777
NCOA2	8.12405	0	0	5.96211	109.054	147.926	25.495	4.67214	0.000208878	0.0247555
ATP2B1	24.3721	43.9932	8.39632	11.9242	795.127	1030.25	23.8558	4.57627	3.17417e-05	0.00760936
AMPD3	0	29.3288	4.19816	5.96211	345.107	422.833	23.547	4.55747	4.57291e-05	0.00893243
GPR137B	24.3721	34.2169	20.9908	5.96211	871.05	1002.76	23.4876	4.55383	3.36326e-05	0.00771209
TOP2A	2.70802	4.88813	0	23.8485	107.673	56.2905	23.4145	4.54933	0.000337566	0.0352295
SLC6A9	5.41603	4.88813	0	0	89.7279	168.871	22.9375	4.51963	0.000435324	0.0409982
HSPA1A	622.844	127.091	134.341	6045.58	2015.43	11103.6	21.5509	4.42967	1.12149e-06	0.000993909
MAOA	2.70802	9.77627	0	0	99.3909	163.635	20.814	4.37948	0.000488809	0.0441068
RP11-295K3.1	0	14.6644	0	0	138.043	145.308	19.637	4.2955	0.000560444	0.0454736
ABCC5	48.7443	34.2169	29.3871	68.5643	1003.57	1158.54	19.608	4.29337	9.64249e-06	0.00350721
JAM2	0	9.77627	4.19816	5.96211	143.565	94.2538	18.446	4.20524	0.000420454	0.0409455
ASS1	2.70802	0	8.39632	5.96211	92.4887	103.417	17.1156	4.09724	0.000673838	0.0478733
R3HDM1	13.5401	9.77627	16.7926	11.9242	310.596	377.015	17.0951	4.09551	4.01854e-05	0.00831128
MAPKAPK5	8.12405	4.88813	4.19816	20.8674	117.336	175.417	16.9529	4.08346	7.38642e-05	0.0132054
ECM1	8.12405	0	25.189	62.6022	244.336	246.107	16.2363	4.02115	3.10025e-05	0.00760499
HSPA1B	389.954	53.7695	88.1614	5398.69	612.91	2631.25	16.1174	4.01055	1.53094e-05	0.00448564
RPS10-NUDT3	18.9561	0	0	17.8863	139.423	192.435	15.9658	3.99691	0.000168074	0.0210326
HSPH1	222.057	175.973	62.9724	1514.38	1365.24	4403.75	15.7091	3.97353	5.44199e-06	0.00220777
FARSB	18.9561	0	20.9908	83.4696	292.651	284.07	15.4494	3.94947	1.82123e-05	0.00519199
ARID2	5.41603	19.5525	0	5.96211	169.793	195.053	15.0309	3.90986	0.000245339	0.0284377
EFNB2	8.12405	29.3288	16.7926	250.409	226.39	242.18	14.608	3.86869	3.502e-06	0.00184696
SLC5A3_1	2.70802	14.6644	4.19816	83.4696	45.5541	140.072	13.5379	3.75893	0.000167724	0.0210326
UBQLN2	27.0802	0	0	17.8863	182.217	202.907	13.4687	3.75154	0.00034365	0.0352295
IER5L	10.8321	0	12.5945	175.882	85.5866	96.872	13.3388	3.73756	3.69973e-05	0.00813599
BCL9	10.8321	4.88813	0	23.8485	82.8257	130.908	13.2659	3.72965	0.000471155	0.0434326
PAPD5	24.3721	19.5525	4.19816	17.8863	240.195	386.179	13.0405	3.70493	0.000169489	0.0210326
AZIN1	48.7443	48.8813	12.5945	98.3749	601.867	737.012	12.9154	3.69102	7.22621e-05	0.0132054
MYH10	29.7882	48.8813	29.3871	59.6211	698.497	630.977	12.9028	3.68961	7.51537e-05	0.013212
PRUNE2	13.5401	9.77627	8.39632	32.7916	153.228	217.307	12.2653	3.61651	7.36222e-05	0.0132054
CCDC88A	27.0802	43.9932	12.5945	35.7727	407.226	547.196	11.8472	3.56647	9.45293e-05	0.0149631
CTNNB1	235.597	361.722	197.314	330.897	4919.85	4140.62	11.8233	3.56357	6.9948e-05	0.0131752
KDM6A	27.0802	9.77627	0	35.7727	212.586	219.926	11.8062	3.56147	0.000149365	0.0197028
HOXB8	2.70802	9.77627	16.7926	5.96211	202.923	128.29	11.6776	3.54567	0.000545183	0.0450804
MAP4K3	18.9561	24.4407	4.19816	11.9242	276.086	269.671	11.5916	3.53501	0.000497702	0.0441156
RAPH1	37.9122	39.1051	0	56.6401	368.574	475.196	11.5385	3.52839	0.000149434	0.0197028
ROCK2	73.1164	112.427	29.3871	47.6969	1129.19	1295.99	11.5001	3.52357	0.000430444	0.0409982
HSPE1	48.7443	24.4407	33.5853	160.977	369.955	709.522	11.3288	3.50193	3.78066e-05	0.00813599
ADAMTS1	75.8245	78.2101	37.7834	292.144	1202.35	623.122	10.9893	3.45803	8.4981e-05	0.0144577
MTF2	8.12405	9.77627	8.39632	11.9242	139.423	140.072	10.9793	3.45671	0.000374664	0.0372826
PREX2	8.12405	53.7695	4.19816	35.7727	443.118	222.544	10.8558	3.44039	0.000344012	0.0352295
MYLK	21.6641	24.4407	4.19816	11.9242	294.031	239.562	10.695	3.41887	0.000689844	0.0479559
EEF1A1P5	70.4084	127.091	264.484	83.4696	2346.73	2501.65	10.683	3.41724	0.000617539	0.0470854
UHRF1BP1L	24.3721	19.5525	0	17.8863	205.684	251.343	10.4941	3.39151	0.000572113	0.0456039
HSPD1	213.933	117.315	109.152	822.772	1435.65	2368.13	10.3787	3.37555	9.70659e-05	0.0150566
P4HA1	48.7443	68.4339	16.7926	74.5264	556.313	759.267	10.3706	3.37442	0.000280543	0.0308246
NOP58	27.0802	24.4407	25.189	71.5454	368.574	353.452	10.2686	3.36017	4.5418e-05	0.00893243
DNAJA2	62.2844	39.1051	41.9816	65.5833	684.693	727.849	10.2012	3.35066	0.00033663	0.0352295
CPEB4	54.1603	34.2169	0	157.996	260.901	501.378	10.1215	3.33936	0.000160734	0.0206759
ESD	75.8245	53.7695	117.548	77.5075	1126.43	1292.06	10.0735	3.33249	0.000525217	0.0450406
ACSL4	40.6202	48.8813	8.39632	95.3938	361.672	524.941	9.97634	3.31851	0.00011133	0.0160649
CHD1	27.0802	24.4407	4.19816	38.7537	229.151	291.925	9.82745	3.29682	0.000489239	0.0441068
HSPA4L	8.12405	19.5525	12.5945	17.8863	122.858	243.489	9.72804	3.28215	0.000473526	0.0434326
NLK	21.6641	14.6644	0	35.7727	136.662	176.726	9.09718	3.18542	0.000502153	0.0441392
PLA2G4A	37.9122	43.9932	12.5945	77.5075	350.629	411.051	8.83861	3.14382	0.000176939	0.0217018
TNS1	48.7443	53.7695	33.5853	68.5643	632.236	490.905	8.73797	3.1273	0.000423119	0.0409455
TXNIP	8.12405	4.88813	33.5853	59.6211	154.608	185.889	8.70235	3.12141	0.000315893	0.0340004
TOB1	21.6641	14.6644	8.39632	196.75	113.195	119.126	8.68274	3.11815	0.000152817	0.0199002
SRSF7	21.6641	34.2169	29.3871	205.693	213.966	250.034	8.31018	3.05488	0.000103356	0.0155742
ATP5G3	32.4962	39.1051	41.9816	208.674	376.857	328.579	8.24061	3.04275	9.36192e-05	0.0149631
PGK1	319.546	195.525	180.521	471.007	2319.12	2839.4	8.06471	3.01162	0.000670541	0.0478733
KIAA0020	2.70802	24.4407	16.7926	41.7348	115.956	171.49	8.06397	3.01149	0.000669587	0.0478733
INTS2	16.2481	14.6644	8.39632	56.6401	113.195	151.853	8.02549	3.00459	0.00027537	0.0305747
ZNF703	16.2481	14.6644	12.5945	160.977	80.0649	124.363	7.97339	2.99519	0.000202128	0.0242278
PALLD	21.6641	9.77627	20.9908	32.7916	229.151	163.635	7.90224	2.98226	0.000589593	0.0456039
TSC22D2	35.2042	19.5525	8.39632	71.5454	155.988	286.689	7.7891	2.96146	0.00069106	0.0479559
AOX1	21.6641	4.88813	12.5945	41.7348	161.51	124.363	7.77296	2.95846	0.00059036	0.0456039
TUBB2A	13.5401	53.7695	37.7834	295.125	212.586	163.635	6.78293	2.76191	0.000551325	0.0450804
PAICS	18.9561	19.5525	20.9908	101.356	117.336	149.235	6.33643	2.66367	0.000592314	0.0456039
MYL9	13.5401	14.6644	41.9816	101.356	142.184	175.417	6.28359	2.65159	0.000655587	0.0478733
VWF	170.605	567.023	302.268	68.5643	53.8367	45.8178	-6.18322	-2.62836	0.000626374	0.0471928
LYN	113.737	239.519	180.521	44.7159	17.9456	9.16356	-7.95058	-2.99106	0.000108879	0.0159508
C2CD2	70.4084	83.0983	50.3779	8.94317	8.28257	7.85448	-7.98302	-2.99693	0.000445212	0.0415584
MTUS1	78.5325	239.519	88.1614	11.9242	12.4239	20.9453	-8.45659	-3.08008	0.000105919	0.0157357
ARHGEF17	113.737	151.532	163.728	47.6969	2.76086	1.30908	-8.71239	-3.12307	0.00058544	0.0456039
C14orf159	51.4523	68.4339	71.3687	17.8863	2.76086	5.23632	-8.99714	-3.16947	0.000311469	0.0338698
CDC25B	59.5764	224.854	289.673	38.7537	15.1847	10.4726	-9.22601	-3.20571	8.38396e-05	0.0144577
TBC1D8	105.613	171.085	67.1706	26.8295	5.52171	3.92724	-10.7034	-3.41999	9.50442e-05	0.0149631
ARVCF	43.3283	48.8813	109.152	17.8863	2.76086	0	-11.2442	-3.49112	0.000350071	0.0352715
APLN	170.605	596.352	898.406	125.204	16.5651	2.61816	-11.6726	-3.54506	0.00052104	0.0450406
FABP5	48.7443	131.98	251.89	32.7916	4.14129	1.30908	-11.9869	-3.58339	0.000115332	0.0162202
TP53I11	48.7443	146.644	184.719	32.7916	0	0	-12.0146	-3.58672	0.000723	0.0489344
KCTD12	487.443	1178.04	209.908	140.11	5.52171	10.4726	-12.1578	-3.60381	0.000535954	0.0450804
GIMAP8	21.6641	73.322	50.3779	8.94317	2.76086	1.30908	-12.431	-3.63587	0.000569	0.0456039
PLA2G4C	40.6202	102.651	146.936	23.8485	0	1.30908	-12.4885	-3.64253	0.00035111	0.0352715
BMF	24.3721	87.9864	75.5669	14.9053	1.38043	1.30908	-12.4901	-3.64272	0.000331189	0.0352295
GBP2	54.1603	43.9932	197.314	23.8485	0	0	-13.0777	-3.70903	0.000548435	0.0450804
ARL10	29.7882	68.4339	29.3871	5.96211	4.14129	0	-13.2798	-3.73116	0.000656181	0.0478733
GIMAP1	43.3283	43.9932	88.1614	14.9053	1.38043	0	-13.6147	-3.7671	0.000255764	0.0290086
FAM124B	24.3721	112.427	46.1798	14.9053	0	0	-13.7848	-3.78501	0.00057913	0.0456039
MZF1	37.9122	34.2169	29.3871	2.98106	2.76086	1.30908	-13.9764	-3.80492	0.000664201	0.0478733
BMX	43.3283	161.308	67.1706	5.96211	4.14129	7.85448	-14.0886	-3.81645	2.13512e-05	0.00573504
PGPEP1	83.9485	107.539	109.152	2.98106	5.52171	9.16356	-14.2119	-3.82903	6.24234e-06	0.00243867
CTDSPL	43.3283	53.7695	100.756	11.9242	1.38043	2.61816	-15.0155	-3.90838	4.10141e-05	0.00831955
PSMB8	35.2042	14.6644	88.1614	8.94317	1.38043	0	-15.9557	-3.996	0.000545853	0.0450804
IGF2R	387.246	420.379	230.899	65.5833	0	0	-16.0574	-4.00516	0.000147667	0.0197028
F2RL3	8.12405	102.651	142.737	0	9.663	3.92724	-16.132	-4.01186	0.00014638	0.0197028
CNTNAP3B	46.0363	48.8813	25.189	11.9242	0	0	-16.4414	-4.03926	0.000666641	0.0478733
SNPH	35.2042	39.1051	50.3779	11.9242	0	0	-16.4505	-4.04006	0.000620485	0.0470854
HTRA3	27.0802	112.427	214.106	20.8674	0	1.30908	-17.0833	-4.09451	9.13753e-05	0.0149631
MT-ND6	460.363	454.596	1225.86	101.356	15.1847	10.4726	-17.2845	-4.11141	1.38541e-05	0.00429598
RP11-693N9.2	16.2481	87.9864	79.7651	11.9242	0	0	-17.9059	-4.16236	0.00022583	0.0264673
MGP	56.8683	161.308	247.691	26.8295	0	0	-18.2243	-4.18779	3.85665e-05	0.00813599
DPP4	24.3721	53.7695	37.7834	8.94317	0	0	-18.6149	-4.21839	0.000676253	0.0478733
KLHDC8B	32.4962	63.5457	172.125	11.9242	2.76086	1.30908	-18.6729	-4.22287	1.33939e-05	0.00428118
BAIAP2-AS1	27.0802	53.7695	37.7834	8.94317	0	0	-19.2146	-4.26413	0.000496606	0.0441156
GIMAP6	46.0363	107.539	125.945	14.9053	1.38043	0	-20.8297	-4.38057	1.42548e-05	0.00429598
TMEM140	92.0726	92.8745	125.945	17.8863	0	2.61816	-21.8921	-4.45234	5.26152e-06	0.00220777
GIMAP7	24.3721	29.3288	41.9816	2.98106	1.38043	0	-22.3638	-4.48309	0.000721481	0.0489344
SLC1A1	62.2844	68.4339	37.7834	8.94317	1.38043	0	-22.8813	-4.5161	2.72291e-05	0.00683839
WSCD1	40.6202	53.7695	83.9632	8.94317	0	1.30908	-22.9059	-4.51765	2.40597e-05	0.0061898
EPB41L4A-AS1	16.2481	29.3288	58.7742	5.96211	0	0	-23.0193	-4.52477	0.000723716	0.0489344
BEND7	32.4962	39.1051	25.189	5.96211	0	0	-23.2379	-4.53841	0.00064994	0.0478733
TNFRSF14	170.605	171.085	424.014	32.7916	0	0	-24.281	-4.60176	1.26997e-05	0.00418613
RP11-443P15.2	105.613	102.651	33.5853	11.9242	0	0	-25.5631	-4.67599	1.18361e-05	0.00402734
TNFSF18	37.9122	39.1051	29.3871	5.96211	0	0	-25.8935	-4.69452	0.000379186	0.03738
LINC00963	27.0802	68.4339	46.1798	5.96211	0	0	-31.8231	-4.992	9.03329e-05	0.0149631
ZNF438	54.1603	58.6576	75.5669	5.96211	1.38043	0	-31.9249	-4.99661	8.1109e-06	0.00305549
AC007362.1	43.3283	171.085	88.1614	8.94317	0	1.30908	-35.712	-5.15834	1.5105e-06	0.00111657
MID1	70.4084	39.1051	54.5761	2.98106	0	1.30908	-41.8228	-5.38622	1.00857e-05	0.00354612
ALKBH7	24.3721	0	88.1614	0	1.38043	0	-46.2053	-5.52999	0.000705369	0.0486289
ACP5	35.2042	34.2169	222.503	2.98106	2.76086	0	-47.9369	-5.58307	1.6686e-06	0.00111657
ITGA11	21.6641	175.973	58.7742	5.96211	0	0	-51.3355	-5.68189	5.37936e-06	0.00220777
TACSTD2	56.8683	327.505	218.304	11.9242	0	0	-58.9129	-5.88051	1.43161e-08	7.83278e-05
C10orf10	16.2481	332.393	927.794	17.8863	1.38043	0	-68.7126	-6.1025	4.08185e-08	0.000107638
MEGF6	70.4084	97.7627	125.945	2.98106	0	0	-113.415	-6.82546	1.21561e-06	0.000993909
ADAMTS18	51.4523	83.0983	37.7834	0	0	0	-191.531	-7.58143	0.000434429	0.0409982
MYZAP	35.2042	87.9864	79.7651	0	0	0	-225.019	-7.8139	0.000263615	0.029581
GPNMB	78.5325	127.091	67.1706	0	0	0	-303.952	-8.2477	9.88958e-05	0.0151182

## Sheet: brain-40-vs-brain-flow-ctrl...
Name	HBMEC-flow-1	HBMEC-flow-2	HBMEC-flow-3	HBMEC-flow-40-1	HBMEC-flow-40-2	Fold change	Log fold change	P-value	FDR p-value
hsa-miR-127-3p	81278.5	88891	74196.2	306.533	628.214	-174.274	-7.44521	3.31218e-52	2.27878e-49
hsa-miR-654-5p	479.185	213.558	197.494	0.187406	0.805255	-582.28	-9.18557	1.25117e-31	4.30403e-29
hsa-miR-432-5p	734.515	370.48	201.763	0.0624685	0.460146	-1593.94	-10.6384	1.51863e-25	3.48272e-23
hsa-miR-487b-3p	204.105	693.82	657.315	1.49924	2.70336	-245.38	-7.93887	6.74771e-23	1.16061e-20
hsa-miR-1180-3p	636.474	253.382	229.657	1.31184	1.03533	-316.052	-8.30402	8.99075e-23	1.23713e-20
hsa-miR-197-3p	636.738	210.505	211.314	0.43728	2.5308	-235.764	-7.8812	2.54804e-22	2.92175e-20
hsa-miR-369-5p	5173.52	11315.9	8471.39	29.1728	93.5821	-135.525	-7.08242	3.59259e-22	3.531e-20
hsa-miR-323a-3p	205.075	348.194	288.656	0.124937	1.43795	-352.75	-8.4625	9.02786e-22	7.76396e-20
hsa-miR-431-5p	475.217	436.224	390.086	0.187406	2.58832	-309.609	-8.2743	4.56657e-21	3.49089e-19
hsa-miR-100-5p	13062.9	24813.6	25624.2	833.705	1011.86	-22.938	-4.51966	1.62755e-20	1.11976e-18
hsa-miR-1307-3p	706.125	468.926	297.784	0.187406	2.35825	-381.881	-8.57698	2.00112e-20	1.25161e-18
hsa-miR-34b-3p	3.43849	2.71307	4.18403	1520.11	2351.4	559.248	9.12734	6.48113e-20	3.60843e-18
hsa-miR-411-5p	4988.55	17686.7	15175.7	41.4166	136.721	-141.634	-7.14602	6.81826e-20	3.60843e-18
hsa-miR-941	135.424	123.832	99.2333	0.0624685	0.230073	-755.569	-9.56142	1.45265e-19	7.13876e-18
hsa-miR-376a-3p	162.755	567.42	518.101	5.30983	2.41576	-107.608	-6.74965	2.44268e-19	1.07132e-17
hsa-miR-505-3p	101.744	96.847	104.263	0.124937	0.345109	-407.13	-8.66935	2.49144e-19	1.07132e-17
hsa-miR-496	59.5123	146.264	134.692	0.124937	0.345109	-460.849	-8.84815	2.72084e-19	1.10114e-17
hsa-miR-155-5p	5867.92	2415.99	2220.07	12.931	16.1051	-240.993	-7.91284	7.89227e-19	3.0166e-17
hsa-miR-154-5p	116.027	201.01	123.703	1.12443	0.517664	-178.627	-7.48081	6.50382e-18	2.35507e-16
hsa-miR-376b-3p	121.405	381.138	559.392	0.937028	3.62365	-154.417	-7.27069	9.03959e-18	3.10962e-16
hsa-miR-485-5p	799.934	261.86	316.549	2.49874	4.08379	-139.094	-7.11991	1.96467e-17	6.43663e-16
hsa-miR-137-3p	112.941	259.728	249.774	0.874559	0.517664	-295.997	-8.20944	8.21905e-17	2.57032e-15
hsa-miR-410-3p	38.5287	130.228	163.557	0.124937	0.460146	-364.801	-8.51097	1.93458e-16	5.78691e-15
hsa-miR-590-3p	19.3085	84.4929	161.444	0	0.287591	-572.727	-9.1617	2.12596e-16	6.09441e-15
hsa-miR-487a-5p	132.514	71.7027	61.4925	0.0624685	0.0575182	-1295.74	-10.3396	2.65862e-16	7.31651e-15
hsa-miR-193a-5p	168.045	65.8405	22.188	0.0624685	0.115036	-872.745	-9.76942	3.82575e-16	1.01235e-14
hsa-miR-376c-3p	141.243	683.695	702.029	2.93602	6.49956	-107.638	-6.75005	6.38885e-16	1.62797e-14
hsa-miR-335-3p	0.0881664	0.193791	1.05657	88.4554	154.149	254.69	7.9926	1.88731e-15	4.63739e-14
hsa-miR-411-3p	67.7118	197.037	141.158	1.12443	0.690218	-148.292	-7.2123	2.21533e-15	5.25567e-14
hsa-miR-660-5p	40.4684	85.0742	78.5245	0.124937	0.287591	-313.493	-8.29229	2.71059e-15	6.21628e-14
hsa-miR-485-3p	205.34	107.942	93.1897	0.0624685	0.575182	-407.238	-8.66973	2.96526e-15	6.58097e-14
hsa-miR-335-5p	0	0.823612	1.01431	131.871	168.701	230.557	7.84898	1.96703e-14	4.22911e-13
hsa-miR-455-3p	210.541	341.314	266.721	1.06197	2.64584	-145.708	-7.18693	2.34336e-14	4.88556e-13
hsa-miR-379-3p	57.749	216.174	164.698	0	0.920291	-310.165	-8.27689	3.90733e-14	7.9066e-13
hsa-miR-889-3p	19.044	204.546	260.044	0.687154	1.38044	-154.52	-7.27165	8.23404e-14	1.61858e-12
hsa-miR-370-3p	74.2361	143.793	249.943	0.124937	0.862773	-308.028	-8.26692	9.65697e-14	1.84556e-12
hsa-miR-369-3p	16.6635	62.4007	84.7794	0	0.115036	-808.381	-9.65889	1.57028e-13	2.91987e-12
hsa-miR-494-5p	31.2109	45.8316	39.389	0	0.230073	-304.155	-8.24866	2.01093e-13	3.64084e-12
hsa-miR-3613-5p	30.5056	74.7549	55.0685	0.499748	0.977809	-71.2046	-6.1539	2.927e-13	5.16353e-12
hsa-miR-28-3p	163.813	110.703	139.552	0.43728	1.20788	-163.857	-7.3563	3.06187e-13	5.26642e-12
hsa-miR-199a-3p	30.9464	85.3649	1856.19	1.31184	2.93343	-308.45	-8.26889	3.67723e-13	6.17057e-12
hsa-miR-379-5p	1574.39	3612.85	2663.75	9.05794	14.092	-225.817	-7.81901	6.57394e-13	1.07687e-11
hsa-miR-576-5p	30.4174	47.4303	37.3604	0	0.287591	-244.104	-7.93135	7.58114e-13	1.21298e-11
hsa-miR-495-3p	13.1368	57.7013	67.7474	0	0.230073	-367.091	-8.51999	8.79356e-13	1.37499e-11
hsa-miR-187-3p	0.440832	1.69567	1.26789	123.75	129.934	100.529	6.65148	9.40585e-13	1.43805e-11
hsa-miR-1271-5p	15.0765	21.2686	36.5151	0	0.172555	-249.328	-7.9619	2.02551e-12	3.02945e-11
hsa-miR-377-3p	7.22965	48.254	82.2436	0.0624685	0.172555	-361.888	-8.4994	2.29061e-12	3.35307e-11
hsa-miR-181a-5p	9.96281	0.726716	4142.52	0	0.0575182	-36921.9	-15.1722	2.56256e-12	3.673e-11
hsa-miR-1185-5p	14.5475	65.7436	61.4502	0	0.345109	-257.059	-8.00596	2.82949e-12	3.97284e-11
hsa-miR-584-5p	62.4218	27.7121	20.582	0	0.287591	-236.781	-7.88741	3.87311e-12	5.32939e-11
hsa-miR-766-3p	30.0648	14.6797	28.3161	0.0624685	0.0575182	-356.178	-8.47645	6.70464e-12	9.04469e-11
hsa-miR-340-3p	25.8328	46.0738	25.2732	801.221	708.509	23.2675	4.54025	7.77193e-12	1.02829e-10
hsa-miR-345-5p	106.241	206.339	160.895	1.62418	0.6327	-139.832	-7.12755	8.28821e-12	1.05598e-10
hsa-miR-381-3p	44.3477	157.261	179.702	0.0624685	1.66803	-145.011	-7.18002	8.1389e-12	1.05598e-10
hsa-miR-654-3p	165.224	361.953	320.268	2.1864	4.14131	-88.8853	-6.47387	8.88755e-12	1.11175e-10
hsa-miR-329-3p	29.8884	27.5668	40.7414	0	0.172555	-334.331	-8.38513	9.63131e-12	1.16252e-10
hsa-miR-1304-3p	37.9997	31.0066	35.5008	0.0624685	0.115036	-353.064	-8.46379	9.49842e-12	1.16252e-10
hsa-miR-10401-3p	191.409	21.9953	14.4539	0.187406	0.690218	-169.26	-7.4031	1.43823e-11	1.70604e-10
hsa-miR-24-2-5p	35.0902	94.57	151.428	0.624685	2.01314	-70.4182	-6.13788	1.6784e-11	1.95718e-10
hsa-miR-337-5p	36.5009	184.78	387.973	0	1.38044	-289.967	-8.17974	1.81688e-11	2.08336e-10
hsa-miR-191-3p	21.9534	23.8363	26.4143	0.187406	0.690218	-53.1264	-5.73136	2.48429e-11	2.80196e-10
hsa-miR-625-3p	7.31781	20.9294	45.3058	0	0.115036	-363.623	-8.5063	3.75814e-11	4.17032e-10
hsa-miR-454-3p	42.0554	57.8951	31.8662	0	0.0575182	-1147.1	-10.1638	3.84662e-11	4.20075e-10
hsa-miR-21-3p	9.69831	22.3344	40.1497	0	0.172555	-248.227	-7.95552	4.86064e-11	5.22519e-10
hsa-miR-382-5p	1163.36	790.328	523.679	3.12343	3.91124	-233.985	-7.87028	6.89197e-11	7.29489e-10
hsa-miR-224-5p	1388	1549.31	900.664	7.9335	6.61459	-175.79	-7.45771	9.11811e-11	9.50494e-10
hsa-miR-942-5p	51.401	21.317	26.1607	0	0.172555	-337.357	-8.39813	9.33031e-11	9.58097e-10
hsa-miR-337-3p	1558.87	3163.4	2849.2	8.37078	29.967	-131.559	-7.03956	2.32838e-10	2.35578e-09
hsa-miR-214-3p	110.12	131.778	137.101	0	2.24321	-111.552	-6.80158	2.851e-10	2.84273e-09
hsa-miR-3605-3p	47.3454	15.2126	24.3012	0	0.287591	-185.645	-7.5364	3.55017e-10	3.48931e-09
hsa-miR-130b-5p	87.8138	116.032	94.0349	1.12443	3.68116	-41.0015	-5.35761	5.30273e-10	5.02928e-09
hsa-miR-323b-3p	117.702	166.176	151.132	0	2.64584	-108.731	-6.76461	5.3363e-10	5.02928e-09
hsa-miR-409-3p	1528.01	1097.39	693.703	3.1859	8.39766	-190.497	-7.57363	5.20027e-10	5.02928e-09
hsa-miR-3135b	51.8419	9.20507	20.1594	0	0.230073	-214.984	-7.74809	8.80861e-10	8.18963e-09
hsa-miR-548k	14.0185	37.9346	39.8539	0	0.0575182	-801.814	-9.64712	1.10839e-09	1.01676e-08
hsa-miR-136-5p	6.61248	26.3556	46.1933	0	0.0575182	-693.753	-9.43828	1.19758e-09	1.08412e-08
hsa-miR-625-5p	137.54	107.07	131.945	0	2.58832	-96.189	-6.5878	1.35144e-09	1.20752e-08
hsa-miR-539-5p	40.7329	25.1444	20.2439	0	0.0575182	-747.952	-9.5468	2.16381e-09	1.90859e-08
hsa-miR-455-5p	28.3014	56.5385	46.1511	0.999497	1.38044	-36.3971	-5.18575	9.46199e-09	8.24032e-08
hsa-miR-138-5p	4.67282	11.3368	11.58	465.328	315.027	42.0901	5.39541	1.01994e-08	8.77151e-08
hsa-miR-136-3p	8.81664	27.5668	29.9644	0	0.0575182	-580.131	-9.18024	1.13631e-08	9.6516e-08
hsa-miR-424-3p	14.812	45.008	26.2875	0.187406	1.2654	-38.8506	-5.27986	1.24832e-08	1.04737e-07
hsa-miR-99a-5p	610.817	1825.08	1500.63	4.5602	19.9013	-107.169	-6.74375	1.33518e-08	1.10675e-07
hsa-miR-543	29.9766	21.4624	18.4266	1.31184	0.345109	-28.0918	-4.81208	1.35886e-08	1.11297e-07
hsa-let-7a-5p	133.66	72.0418	21416.5	64.3426	39.1124	-139.312	-7.12218	1.55122e-08	1.25557e-07
hsa-miR-147b-3p	0.0881664	0.0484477	0	18.6156	30.4271	578.16	9.17533	1.95322e-08	1.56257e-07
hsa-miR-493-5p	21.7771	43.2154	47.6303	0.312343	1.09285	-52.4151	-5.71191	2.84078e-08	2.2465e-07
hsa-miR-193b-3p	129.34	183.423	220.401	1.74912	5.80934	-46.8243	-5.54919	3.6719e-08	2.87076e-07
hsa-miR-889-5p	10.3155	19.1853	17.9617	0	0.115036	-233.324	-7.86619	4.52734e-08	3.49979e-07
hsa-miR-758-3p	6.70065	16.5207	9.55141	0	0.115036	-161.276	-7.33339	5.47491e-08	4.18527e-07
hsa-miR-3152-5p	26.4499	49.4651	55.3221	1.74912	0.230073	-44.1067	-5.46293	5.67864e-08	4.2933e-07
hsa-miR-376b-5p	8.90481	22.7704	27.006	0	0.0575182	-512.985	-9.00277	6.98487e-08	5.22347e-07
hsa-miR-1226-3p	29.7121	17.2958	5.19834	0	0.0575182	-456.011	-8.83293	7.09592e-08	5.24946e-07
hsa-miR-150-5p	7.49415	12.4511	28.3584	440.341	613.432	32.6183	5.02761	7.21633e-08	5.28174e-07
hsa-miR-130b-3p	7.75865	23.4003	15.3837	0.0624685	0.172555	-121.938	-6.93	8.46586e-08	6.13106e-07
hsa-miR-214-5p	26.3618	31.8302	42.0938	0	1.09285	-59.863	-5.90359	1.22743e-07	8.79656e-07
hsa-miR-412-5p	4.76099	15.5033	15.5105	0.0624685	0.172555	-93.8977	-6.55302	2.94629e-07	2.08974e-06
hsa-miR-362-5p	4.93732	24.5146	20.8779	0	0.0575182	-440.857	-8.78417	3.13786e-07	2.20291e-06
hsa-miR-195-5p	14.3711	42.6825	94.4998	581.582	999.609	15.6376	3.96695	3.19873e-07	2.22296e-06
hsa-miR-134-5p	52.1064	92.293	37.6562	0	2.30073	-52.2737	-5.70801	3.39001e-07	2.33233e-06
hsa-miR-1301-3p	24.1576	6.63734	9.12878	0	0.115036	-196.032	-7.61494	4.35622e-07	2.9674e-06
hsa-let-7a-2-3p	34.2086	34.2526	42.1784	1.99899	1.95562	-18.6511	-4.22119	5.56853e-07	3.75603e-06
hsa-miR-1227-3p	25.5683	4.65098	11.7491	0	0.0575182	-366.411	-8.51732	9.48935e-07	6.33852e-06
hsa-miR-487a-3p	9.78648	18.9915	14.8765	0.0624685	0.115036	-148.998	-7.21915	1.18251e-06	7.82275e-06
hsa-miR-2110	13.754	5.08701	9.6782	0	0.115036	-139.393	-7.12301	1.20919e-06	7.92307e-06
hsa-miR-218-5p	4.49649	0.968955	666.528	2.56121	1.15036	-120.189	-6.90916	2.06339e-06	1.33926e-05
hsa-miR-409-5p	8.02315	15.3095	6.63527	0	0.0575182	-261.593	-8.03118	2.27653e-06	1.46378e-05
hsa-miR-4448	79.6143	17.9741	18.004	1.62418	1.8981	-21.744	-4.44254	2.92329e-06	1.86225e-05
hsa-miR-99b-5p	5837.94	5277.36	2939.26	22388.5	21711.2	4.70671	2.23472	2.99712e-06	1.89176e-05
hsa-miR-935	308.406	175.865	217.231	9.62015	15.4724	-18.6043	-4.21756	3.21544e-06	2.01111e-05
hsa-miR-493-3p	66.9183	73.4468	76.8339	0	3.68116	-39.1157	-5.28968	3.57005e-06	2.21278e-05
hsa-let-7c-5p	2483.74	2118.67	1237.75	17108.3	19058.7	9.28962	3.21562	3.69854e-06	2.27196e-05
hsa-miR-1260a	61.0112	10.174	685.546	1.1869	8.62773	-51.3038	-5.68099	4.24508e-06	2.58462e-05
hsa-miR-339-3p	9.78648	18.0226	29.6685	1.1869	0.230073	-26.9569	-4.75258	7.00618e-06	4.22829e-05
hsa-miR-652-3p	283.279	310.502	301.757	4892.79	5822.51	17.9376	4.16491	9.67577e-06	5.78863e-05
hsa-miR-374a-5p	7.05332	14.2436	17.8349	0.124937	0.172555	-83.007	-6.37516	1.62641e-05	9.64632e-05
hsa-miR-204-5p	1750.9	2109.66	2024.01	38.3557	58.4385	-40.5039	-5.33999	1.91405e-05	0.000112553
hsa-miR-433-3p	71.4148	29.8438	18.3421	0	0	-4739.04	-12.2104	2.1647e-05	0.000126213
hsa-miR-154-3p	11.2853	14.0014	14.3271	0	0.345109	-71.4278	-6.15841	3.28963e-05	0.00019019
hsa-miR-495-5p	38.0879	36.2874	26.9215	0	0	-4006.53	-11.9681	3.37199e-05	0.000193327
hsa-miR-494-3p	0.0881664	20.7356	19.61	0	0.115036	-202.256	-7.66004	4.19788e-05	0.000238689
hsa-miR-497-5p	12.0788	24.3208	32.7115	251.811	249.399	10.8396	3.43823	4.62067e-05	0.000260575
hsa-miR-26a-5p	0	3.58513	6193.29	12.806	5.17664	-229.527	-7.84252	5.13382e-05	0.00028716
hsa-miR-6756-3p	32.1808	16.7629	18.6802	0	0	-2673.67	-11.3846	5.80672e-05	0.000319602
hsa-miR-5010-3p	48.9324	15.1641	15.0879	0	0	-3136.15	-11.6148	5.76766e-05	0.000319602
hsa-miR-195-3p	0.0881664	2.03481	1.52146	36.4816	26.2858	25.184	4.65444	6.08996e-05	0.000327336
hsa-miR-2116-3p	6.08348	5.81373	6.00133	0	0.0575182	-155.295	-7.27886	6.00085e-05	0.000327336
hsa-miR-598-3p	4.58466	9.83489	8.11448	0	0.0575182	-197.831	-7.62812	6.07868e-05	0.000327336
hsa-miR-33b-3p	7.75865	7.65474	2.57804	0	0.115036	-88.1302	-6.46156	6.76399e-05	0.000360746
hsa-miR-381-5p	11.109	4.60254	5.36739	0	0.0575182	-182.363	-7.51067	6.94742e-05	0.000367679
hsa-miR-30d-5p	849.66	1958.4	2005.21	13285.2	9373.57	7.06103	2.81988	7.69207e-05	0.000403981
hsa-miR-6511a-3p	13.4013	2.80997	3.55008	0	0.0575182	-172.169	-7.42768	8.36651e-05	0.000436073
hsa-miR-216a-5p	0.176333	9.93179	16.7361	0.0624685	0	-230.119	-7.84624	8.72629e-05	0.000451405
hsa-miR-3605-5p	8.11131	6.10442	3.71913	0	0.0575182	-154.785	-7.27412	9.06273e-05	0.00046531
hsa-miR-6746-3p	18.0741	1.0174	4.86023	0	0.0575182	-210.142	-7.71522	9.87415e-05	0.000503216
hsa-miR-181a-2-3p	39.1459	59.5423	60.3091	0	5.0616	-20.8606	-4.38271	0.000100512	0.00050847
hsa-miR-3615	22.7469	16.2784	18.8915	0	0	-2281.87	-11.156	0.00011125	0.000558684
hsa-miR-1284	7.58231	6.92803	2.66256	0	0.115036	-83.9611	-6.39165	0.000112168	0.000559214
hsa-miR-146a-5p	28.4778	77.6133	170.489	1310.9	1641.68	16.0055	4.00049	0.000115749	0.000572918
hsa-miR-34c-5p	0.0881664	0.0968955	0.126789	7.24635	13.9769	93.6522	6.54924	0.00011675	0.000573741
hsa-miR-149-5p	851.335	867.844	659.639	41.8539	72.703	-13.8369	-3.79045	0.00012477	0.000608808
hsa-miR-328-3p	145.122	100.432	72.9458	707.394	845.633	7.32141	2.87212	0.00012989	0.000629325
hsa-miR-340-5p	3.70299	2.80997	17.9617	84.3325	97.0907	11.0794	3.46981	0.000146119	0.000703004
hsa-miR-183-5p	0.264499	2.85842	10.8193	65.5295	87.1401	16.3434	4.03063	0.000195111	0.000932196
hsa-miR-5581-3p	3.61482	9.25352	5.79002	0	0.230073	-49.2573	-5.62227	0.000210891	0.00100064
hsa-miR-3117-3p	21.3363	14.0983	9.46689	0	0	-1774.06	-10.7928	0.000225209	0.00106126
hsa-miR-125b-2-3p	0	12.984	12.5521	0	0.0575182	-226.477	-7.82322	0.000234601	0.001098
hsa-miR-301a-3p	0.0881664	11.6275	9.04426	143.24	94.0423	17.1014	4.09604	0.000250209	0.00116314
hsa-miR-769-3p	0	11.8213	10.608	0	0.0575182	-198.926	-7.63609	0.000264768	0.00122255
hsa-miR-12135	0	11.6759	11.3687	0	0.0575182	-204.384	-7.67514	0.000287262	0.00131758
hsa-miR-664a-3p	11.9906	15.6486	14.623	0	0	-1698.43	-10.73	0.000292237	0.00133152
hsa-let-7d-3p	157.994	106.73	90.6116	490.565	759.068	5.27923	2.40033	0.000295419	0.00133716
hsa-miR-2682-3p	10.4036	11.4821	10.2699	0	0	-1279.05	-10.3209	0.000344829	0.0015409
hsa-miR-887-3p	4.84915	22.8189	16.398	0	0	-1751.43	-10.7743	0.000346796	0.0015409
hsa-miR-668-3p	3.26216	17.1505	14.623	0	0	-1393.14	-10.4441	0.00034715	0.0015409
hsa-miR-323a-5p	20.9836	9.88334	8.57937	0	0	-1558.4	-10.6059	0.00037197	0.00164048
hsa-miR-299-5p	4.76099	11.3368	15.8908	0	0	-1273.82	-10.3149	0.000396983	0.00173964
hsa-miR-487b-5p	17.2806	6.58889	6.04359	0	0	-1181.47	-10.2064	0.000429117	0.00186856
hsa-miR-503-5p	0	11.579	9.50915	0	0.0575182	-187.036	-7.54717	0.000461897	0.00199865
hsa-miR-377-5p	10.7563	8.96283	9.97404	0	0	-1163.29	-10.184	0.000484044	0.00208139
hsa-miR-10a-5p	1405.28	3823.54	3417.55	16211.6	14968.4	5.40908	2.43538	0.00060307	0.00256119
hsa-miR-299-3p	8.72848	6.73424	13.9468	0	0	-1169.86	-10.1921	0.000602255	0.00256119
hsa-miR-628-3p	6.70065	16.9083	5.9168	0	0	-1173.34	-10.1964	0.000661723	0.00279304
hsa-miR-3187-3p	28.3014	3.10066	4.18403	0	0	-1409.3	-10.4608	0.000681148	0.0028575
hsa-miR-1249-3p	1.41066	2.37394	1.35241	17.9909	19.4412	10.7179	3.42195	0.000751102	0.00313187
hsa-miR-135b-5p	0.528999	0.629821	4.94476	26.5491	35.6038	15.0779	3.91436	0.000759678	0.00314854
hsa-miR-656-3p	0	16.666	26.7101	0	0	-1722.4	-10.7502	0.000796991	0.00328341
hsa-miR-138-2-3p	0	0	0	4.68514	5.80934	852.886	9.73621	0.000820295	0.0033593
hsa-miR-22-3p	5190.89	10321.9	13624.8	25523.5	35351.9	3.13384	1.64793	0.000962895	0.00391995
hsa-miR-365a-3p	128.106	72.9623	156.753	808.405	577.483	5.80966	2.53845	0.00100192	0.00405484
hsa-miR-877-3p	22.8351	3.10066	3.25424	81.9587	96.8031	9.21701	3.2043	0.00105518	0.00424539
hsa-miR-206	0.0881664	0	2.02862	15.6171	31.8651	32.9642	5.04283	0.00118958	0.00475833
hsa-miR-432-3p	8.02315	8.23612	7.56506	0	0	-941.922	-9.87946	0.00125299	0.00498298
hsa-miR-1237-3p	8.55215	1.59878	2.19767	0	0.0575182	-107.4	-6.74684	0.00130511	0.00516042
hsa-miR-376c-5p	1.058	9.25352	11.8336	0	0	-881.161	-9.78326	0.00142471	0.00560113
hsa-miR-1843	2.55683	10.0287	4.01497	0.124937	0.115036	-43.3885	-5.43924	0.00143605	0.00561363
hsa-miR-10399-3p	2.55683	10.4163	7.18469	0	0	-803.611	-9.65035	0.00149166	0.00579155
hsa-miR-138-1-3p	0	0	1.52146	16.2418	20.2464	35.0404	5.13095	0.0014984	0.00579155
hsa-miR-217-5p	3.87932	7.6063	7.77637	0	0	-772.159	-9.59275	0.00152542	0.00586307
hsa-miR-548d-5p	9.16931	3.39134	7.90316	0	0	-809.144	-9.66025	0.00155329	0.00593703
hsa-miR-10526-3p	21.3363	0.920507	1.43694	0	0	-938.521	-9.87424	0.0015777	0.00596407
hsa-miR-1229-3p	18.7795	3.82737	1.01431	0	0	-935.217	-9.86916	0.00156988	0.00596407
hsa-miR-629-3p	5.28999	7.21871	7.73411	0	0	-819.998	-9.67948	0.00165308	0.00621485
hsa-miR-3173-5p	11.1971	4.45719	2.9584	0	0	-734.117	-9.51987	0.00167831	0.00627542
hsa-miR-92b-5p	14.9883	1.88946	4.4376	0	0	-843.008	-9.7194	0.00170356	0.00633539
hsa-miR-589-5p	10.2273	4.84477	4.18403	0	0	-757.733	-9.56555	0.0017449	0.00645427
hsa-miR-1-3p	2.64499	1.40498	15.1301	0	0	-762.913	-9.57537	0.00183451	0.00674943
hsa-miR-4685-3p	4.05566	8.23612	5.83228	0	0	-725.695	-9.50322	0.00184467	0.00675072
hsa-miR-380-3p	0	7.84853	8.15674	0	0.0575182	-141.979	-7.14954	0.00189151	0.00688549
hsa-miR-330-5p	4.49649	7.07337	10.0586	49.7874	50.4435	6.85143	2.7764	0.00191924	0.00694967
hsa-miR-548o-3p	8.72848	2.03481	6.93111	0	0	-700.135	-9.45149	0.00196486	0.00707761
hsa-let-7c-3p	4.14382	3.92427	1.77504	0	0.0575182	-85.0006	-6.4094	0.00223896	0.00802295
hsa-miR-134-3p	0	7.70319	14.5384	0	0	-883.868	-9.78769	0.00225877	0.008052
hsa-miR-3661	12.6078	0.920507	5.40965	0	0	-749.709	-9.55019	0.00228213	0.00809332
hsa-miR-100-3p	0	3.19755	7.69185	0	0.0575182	-96.6943	-6.59536	0.00246543	0.00869854
hsa-miR-378i	0.793498	11.0945	9.97404	47.9134	86.6799	9.19993	3.20162	0.00274269	0.0096274
hsa-miR-665	0	3.00376	9.08652	0	0.0575182	-107.353	-6.74622	0.00284441	0.00988359
hsa-miR-16-2-3p	0	6.00752	7.98769	0	0.0575182	-124.175	-6.95623	0.00283286	0.00988359
hsa-miR-770-5p	11.109	3.10066	1.77504	0	0	-631.101	-9.30173	0.00301608	0.0104275
hsa-miR-382-3p	0	10.2225	7.18469	0	0	-692.008	-9.43464	0.0037059	0.0127483
hsa-miR-7705	3.70299	7.41251	3.97271	0	0	-602.393	-9.23456	0.00383227	0.0131174
hsa-miR-887-5p	5.73082	4.99012	5.07155	0	0	-617.119	-9.2694	0.00399281	0.0135993
hsa-miR-450a-5p	16.399	35.3184	45.9398	154.11	210.287	5.58489	2.48153	0.00409074	0.0138642
hsa-miR-301b-3p	0.0881664	8.09077	8.28353	0	0	-654.83	-9.35498	0.00422039	0.0142335
hsa-miR-143-3p	5.11365	2.56773	6.33943	12.5562	55.2175	7.24719	2.85742	0.00435611	0.0146195
hsa-miR-1277-3p	5.20182	1.64722	6.29717	0	0	-521.375	-9.02618	0.00449206	0.0150026
hsa-miR-6749-3p	7.14148	4.06961	2.6203	0	0	-543.154	-9.08522	0.00452404	0.0150364
hsa-miR-4659a-3p	5.46632	4.69943	3.21198	0	0	-522.568	-9.02947	0.00456764	0.0151084
hsa-miR-1913	13.5776	0.775164	0.549418	0	0	-589.854	-9.20421	0.00494164	0.0162672
hsa-miR-548ad-5p	7.22965	1.74412	3.00067	0	0	-471.359	-8.88068	0.00518724	0.0168541
hsa-miR-501-3p	6.52432	4.55409	3.12745	0	0	-556.217	-9.1195	0.00519342	0.0168541
hsa-miR-542-3p	0	0.43603	0	4.24786	5.98189	32.1916	5.00861	0.00517099	0.0168541
hsa-miR-92a-1-5p	8.46398	1.45343	1.43694	0	0	-447.734	-8.8065	0.00547833	0.0176126
hsa-miR-12136	0	11.8213	4.31081	0	0	-641.363	-9.325	0.00545628	0.0176126
hsa-miR-6747-3p	4.93732	3.73048	2.57804	0	0	-438.235	-8.77556	0.00555468	0.017775
hsa-miR-1287-5p	0	8.09077	6.97338	0	0.115036	-75.5652	-6.23965	0.00569469	0.0181387
hsa-miR-4645-3p	8.46398	0.920507	1.64825	0	0	-435.37	-8.7661	0.00579317	0.0183673
hsa-miR-6803-3p	9.34564	1.06585	0.845258	0	0	-444.584	-8.79631	0.00583515	0.0184155
hsa-miR-301a-5p	0.0881664	0	4.35308	21.2393	33.9357	18.4726	4.20731	0.00588759	0.0184962
hsa-miR-217-3p	0	7.80009	6.80433	0	0	-580.844	-9.18201	0.00600068	0.0187658
hsa-miR-1307-5p	0	4.2634	10.8193	0	0	-599.873	-9.22851	0.00603081	0.0187747
hsa-miR-1185-1-3p	0	5.57149	7.81863	0	0	-532.713	-9.05721	0.00612505	0.0189822
hsa-miR-655-3p	0	3.00376	9.72046	0	0	-506.319	-8.9839	0.00630499	0.0194522
hsa-miR-6766-3p	0.969831	3.19755	3.97271	0	0	-327.482	-8.35527	0.00646618	0.0198604
hsa-miR-410-5p	0	5.32925	7.39601	0	0	-506.34	-8.98396	0.00656048	0.0200605
hsa-miR-193b-5p	5.99532	0.872059	1.4792	0	0	-328.443	-8.3595	0.00660922	0.0201201
hsa-miR-664b-3p	1.8515	1.88946	3.84592	0	0	-305.778	-8.25634	0.006681	0.020249
hsa-miR-2116-5p	6.87698	1.0174	2.70483	0	0	-417.927	-8.70711	0.00676557	0.0204154
hsa-miR-500a-5p	0	6.492	8.57937	0	0	-599.398	-9.22737	0.00683407	0.0205321
hsa-miR-3130-5p	2.73316	2.51928	3.08519	0	0	-334.083	-8.38406	0.00689915	0.0206375
hsa-miR-6819-3p	3.26216	3.00376	2.2822	0	0	-329.396	-8.36368	0.00709886	0.020783
hsa-miR-2355-3p	3.61482	2.61618	1.64825	0	0	-306.203	-8.25834	0.00709779	0.020783
hsa-miR-3614-5p	3.70299	2.27704	1.8173	0	0	-301.372	-8.2354	0.00706592	0.020783
hsa-miR-1908-3p	4.93732	1.1143	1.90183	0	0	-312.037	-8.28558	0.00706445	0.020783
hsa-miR-629-5p	2.11599	4.50564	1.22562	0	0	-312.467	-8.28756	0.00708878	0.020783
hsa-miR-1343-3p	5.55449	1.0174	3.88819	0	0	-413.225	-8.69078	0.0072371	0.021009
hsa-miR-374a-3p	0	6.492	4.94476	0	0	-455.186	-8.83031	0.00723452	0.021009
hsa-miR-24-3p	21392.1	24104.9	20710.5	25380.3	93802.8	2.70022	1.43307	0.00730693	0.0211225
hsa-miR-641	0	3.87582	4.77571	0	0.0575182	-76.84	-6.26378	0.00737119	0.0212191
hsa-miR-4758-3p	6.25982	0.339134	1.64825	0	0	-325.571	-8.34683	0.00745106	0.0213597
hsa-miR-1294	3.08583	1.59878	2.02862	0	0.0575182	-56.6154	-5.82312	0.007503	0.0214194
hsa-miR-140-5p	21.4244	66.1796	60.2246	203.085	230.303	4.39186	2.13483	0.00760095	0.0215616
hsa-miR-204-3p	10.1391	1.21119	0	0	0	-449.981	-8.81372	0.0076155	0.0215616
hsa-miR-4731-3p	5.20182	0.629821	1.98636	0	0	-307.921	-8.26642	0.00781675	0.0219507
hsa-miR-449a	12.5196	9.39886	7.31148	2.1864	0	-8.86587	-3.14826	0.00780377	0.0219507
hsa-miR-4731-5p	7.14148	2.47084	0.507155	0	0	-399.585	-8.64236	0.00791021	0.0220599
hsa-miR-3944-3p	5.90715	0.726716	1.26789	0	0	-311.037	-8.28094	0.00791976	0.0220599
hsa-miR-4742-3p	3.08583	3.29445	0.549418	0.0624685	0	-59.6113	-5.89751	0.00802037	0.0222501
hsa-miR-6789-5p	14.7238	0	0	0	0	-584.385	-9.19077	0.00839355	0.0231918
hsa-miR-10a-3p	9.16931	18.4586	15.1301	58.4081	80.4104	4.84046	2.27514	0.00845663	0.0232726
hsa-miR-589-3p	4.93732	2.2286	1.85957	0	0	-352.506	-8.46151	0.00867334	0.0237739
hsa-miR-328-5p	0	0	0	0	5.52175	451.935	8.81997	0.00880784	0.0239518
hsa-miR-624-5p	0	6.10442	4.52213	0	0	-423.049	-8.72468	0.00878797	0.0239518
hsa-miR-199a-5p	0	0	13.0592	0	0	-519.417	-9.02075	0.00917933	0.0248637
hsa-miR-7704	6.34798	0.823612	1.90183	0	0	-357.449	-8.4816	0.00965271	0.0260434
hsa-miR-125b-5p	12.5196	24.5146	8638.7	219.327	146.269	-15.8196	-3.98364	0.00980666	0.0263554
hsa-miR-6724-5p	7.31781	0.629821	0.887521	0	0	-348.556	-8.44525	0.00999072	0.0266419
hsa-miR-7-5p	90.8996	45.0564	2350.11	125.687	52.169	-9.31806	-3.22003	0.0099676	0.0266419
hsa-miR-615-3p	2.82133	2.66463	2.11314	0	0	-293.939	-8.19937	0.0102342	0.0271858
hsa-miR-1197	7.05332	0	2.70483	0	0	-387.031	-8.59631	0.0103513	0.027391
hsa-miR-1262	0	5.91063	3.71913	0	0	-383.498	-8.58308	0.010782	0.0283132
hsa-miR-30c-5p	102.449	227.462	229.91	1841.26	1255.79	8.2949	3.05223	0.0107741	0.0283132
hsa-miR-365b-5p	0	1.93791	0.549418	13.8055	12.654	15.59	3.96255	0.0109601	0.0286713
hsa-miR-501-5p	0	5.86218	3.7614	0	0	-383.255	-8.58216	0.0110083	0.0286883
hsa-miR-942-3p	3.87932	2.08325	3.33877	0	0.172555	-31.2414	-4.96539	0.0110793	0.0287644
hsa-miR-181c-5p	20.9836	51.7906	37.9943	163.73	164.905	4.44081	2.15082	0.0117529	0.0303984
hsa-miR-769-5p	0	3.39134	5.40965	0	0	-350.713	-8.45415	0.011837	0.0305013
hsa-miR-3620-3p	8.11131	0	0	0	0	-321.868	-8.33033	0.0123781	0.0317767
hsa-miR-330-3p	5.73082	5.95907	2.57804	0.249874	0.115036	-25.0628	-4.64748	0.0125238	0.032031
hsa-miR-6515-3p	3.52666	1.79257	1.8173	0	0	-275.532	-8.10607	0.0127114	0.0323905
hsa-miR-25-3p	119.642	201.979	105.573	391.178	435.068	2.90051	1.53631	0.0128033	0.0324017
hsa-miR-380-5p	0	3.10066	4.26855	0	0	-293.936	-8.19936	0.01281	0.0324017
hsa-miR-484	143.359	214.527	201.34	669.413	773.562	3.86708	1.95124	0.012898	0.0325049
hsa-miR-93-5p	197.228	233.567	180.674	1521.61	1633	7.73753	2.95187	0.0130306	0.0327191
hsa-miR-937-3p	4.32016	2.56773	0.507155	0	0	-291.525	-8.18747	0.0132126	0.0330556
hsa-miR-181d-5p	42.7607	53.2441	38.7128	229.072	221.848	5.01702	2.32683	0.0132889	0.0330582
hsa-miR-503-3p	6.96515	2.56773	4.60666	0.249874	0.115036	-24.7419	-4.62888	0.0133361	0.0330582
hsa-miR-125a-5p	2909.14	1903.22	3033.25	9425.44	7631.74	3.2612	1.7054	0.0133578	0.0330582
hsa-miR-431-3p	3.26216	2.08325	1.35241	0	0	-259.62	-8.02026	0.0134148	0.0330803
hsa-miR-3200-3p	3.08583	1.40498	1.77504	0	0	-241.773	-7.91751	0.013675	0.0336014
hsa-miR-99a-3p	3.35032	1.16275	1.69052	0	0	-241.188	-7.91401	0.0137588	0.0336871
hsa-miR-655-5p	4.32016	0.775164	1.52146	0	0	-259.52	-8.0197	0.0138722	0.0338443
hsa-let-7f-5p	9365.48	13292.1	8764.06	19795.8	27251	2.2459	1.16729	0.0140966	0.0342702
hsa-miR-219a-1-3p	5.20182	0.726716	0.718469	0	0	-261.359	-8.02989	0.0143636	0.0347963
hsa-miR-216a-3p	2.11599	1.0174	3.00067	0	0	-244.333	-7.9327	0.0144329	0.0348414
hsa-miR-548l	2.82133	4.65098	0	0	0	-296.94	-8.21403	0.0145749	0.0350612
hsa-miR-4473	6.78882	0.872059	0	0	0	-303.525	-8.24567	0.0148059	0.0354928
hsa-miR-6815-5p	9.69831	0	0	0	0	-384.876	-8.58825	0.0153115	0.0365775
hsa-miR-4749-3p	4.76099	0.339134	1.05657	0	0	-242.372	-7.92108	0.0156137	0.0371704
hsa-miR-5701	0	0	9.04426	0	0	-360.077	-8.49216	0.0160457	0.038067
hsa-miR-147b-5p	0	0	0	0	3.33606	273.449	8.09513	0.0162605	0.038444
hsa-miR-616-3p	5.81899	0	0.676206	0	0	-257.257	-8.00706	0.0164006	0.0386425
hsa-miR-452-5p	0	4.11806	2.45125	0	0	-262.139	-8.03419	0.0165274	0.0388084
hsa-miR-30b-5p	3.26216	43.07	67.4516	204.959	201.371	5.35293	2.42033	0.0166638	0.0389956
hsa-miR-3085-3p	0	3.73048	3.29651	0	0	-280.333	-8.131	0.0167818	0.0391386
hsa-miR-222-5p	6.78882	5.18391	16.6938	34.9824	40.8379	3.95187	1.98253	0.0174036	0.0404517
hsa-miR-376a-2-5p	0	3.00376	2.70483	0	0	-228.078	-7.83338	0.0180852	0.0418943
hsa-miR-550a-5p	2.64499	0.823612	2.11314	0	0	-219.117	-7.77556	0.0183121	0.0421362
hsa-miR-6894-3p	3.70299	0	2.70483	0	0	-254.377	-7.99083	0.0182782	0.0421362
hsa-miR-502-5p	0	3.10066	2.6203	0	0	-228.561	-7.83643	0.0185599	0.0424226
hsa-miR-6791-3p	3.35032	2.71307	0	0	0	-240.622	-7.91063	0.0185549	0.0424226
hsa-miR-539-3p	0	1.55033	4.0995	0	0	-225.787	-7.81882	0.0188465	0.0429352
hsa-miR-3085-5p	0	3.39134	2.32446	0	0	-228.328	-7.83497	0.0190316	0.0432136
hsa-let-7d-5p	1762.45	1837.57	1231.92	6240.36	6920.07	4.08567	2.03057	0.0193415	0.0436294
hsa-miR-92a-3p	539.755	180.177	2807.48	166.791	120.846	-8.17533	-3.03128	0.0192819	0.0436294
hsa-miR-370-5p	0	3.10066	3.67687	0	0.115036	-34.0705	-5.09045	0.0195084	0.0438619
hsa-miR-1910-5p	19.044	10.1256	6.42396	1.93652	0	-12.1738	-3.60571	0.0198127	0.0444011
hsa-miR-376a-5p	0	2.27704	3.12745	0	0	-216.064	-7.75532	0.0204407	0.0456598
hsa-miR-29c-5p	13.6658	35.3184	38.6705	125.499	98.5862	3.82552	1.93566	0.020986	0.0467262
hsa-miR-6780b-3p	2.73316	1.84101	1.01431	0	0	-216.737	-7.7598	0.0211793	0.0470043
hsa-miR-145-3p	0	0	0	0.874559	1.55299	198.998	7.63661	0.0212863	0.0470899
hsa-miR-320d	8.90481	5.91063	1.39468	0.812091	0	-13.1004	-3.71154	0.0216314	0.0477001
hsa-miR-6511b-3p	4.84915	0.290686	0.676206	0	0	-229.007	-7.83925	0.0219985	0.0483546
hsa-miR-1908-5p	0.617165	2.90686	1.56373	0	0	-205.446	-7.68262	0.0222013	0.0486449
hsa-miR-133a-3p	0	0	6.46622	0	0	-257.775	-8.00997	0.0225076	0.0491594
hsa-miR-342-3p	267.497	286.472	228.896	1113.25	653.177	3.38466	1.75901	0.0232881	0.0507031
hsa-miR-6752-3p	4.84915	0.968955	0	0	0	-230.389	-7.84793	0.0244748	0.0531187
hsa-miR-3939	5.02549	0.920507	0	0	0	-235.458	-7.87932	0.0247548	0.0535575
hsa-miR-451a	126.96	300.182	806.587	93.5779	126.828	-3.73174	-1.89985	0.0250417	0.0537833
hsa-miR-6743-3p	3.26216	0.532925	0.718469	0	0.0575182	-38.8957	-5.28154	0.0251718	0.0537833
hsa-miR-6738-3p	6.25982	0	0	0	0	-248.352	-7.95624	0.0251339	0.0537833
hsa-miR-3157-5p	2.90949	0.43603	1.26789	0	0	-180.616	-7.49678	0.0250256	0.0537833
hsa-miR-664a-5p	3.17399	1.69567	0.380366	0	0	-206.24	-7.68818	0.0257914	0.0545984
hsa-miR-6885-3p	3.87932	0.726716	0.718469	0	0	-208.437	-7.70346	0.0257176	0.0545984
hsa-miR-548q	4.32016	1.50188	0	0	0	-230.663	-7.84964	0.025662	0.0545984
hsa-miR-1290	0	0	0	0	2.76087	226.502	7.82338	0.0264955	0.0559169
hsa-miR-450b-5p	0	1.21119	3.88819	0	0	-203.962	-7.67216	0.0266687	0.0561103
hsa-miR-7110-3p	1.67516	0.339134	2.23993	0	0	-169.141	-7.40208	0.026925	0.0563422
hsa-miR-744-5p	75.2941	23.5456	26.4566	160.544	161.339	3.85928	1.94833	0.0269427	0.0563422
hsa-miR-378c	0	0	0.0422629	0.187406	2.30073	54.1456	5.75877	0.0272846	0.0568842
hsa-miR-548w	0.705332	1.74412	2.2822	0	0	-193.485	-7.59608	0.0274529	0.0568903
hsa-miR-92b-3p	2915.84	640.528	448.325	133.183	227.484	-7.40177	-2.88787	0.0274499	0.0568903
hsa-miR-4510	31.0346	22.9642	3.55008	157.046	22.4321	4.6805	2.22666	0.0285083	0.0589
hsa-miR-7109-3p	2.55683	0.43603	1.22562	0	0	-164.846	-7.36497	0.0288633	0.059455
hsa-miR-5585-3p	4.58466	0	0.802995	0	0	-213.309	-7.7368	0.0290071	0.0595728
hsa-miR-197-5p	5.81899	0	0	0	0	-230.847	-7.85079	0.0294637	0.0603304
hsa-miR-4725-3p	0	4.16651	0.718469	0	0	-195.168	-7.60858	0.0303868	0.0618523
hsa-miR-1296-5p	0.0881664	1.98636	1.85957	0	0.0575182	-35.1191	-5.13418	0.0303194	0.0618523
hsa-miR-211-5p	0.0881664	0.0484477	4.77571	0	0	-196.423	-7.61782	0.0306412	0.0621864
hsa-miR-1304-5p	3.08583	0	1.56373	0	0	-184.349	-7.52629	0.0314028	0.0635446
hsa-miR-342-5p	0.0881664	1.40498	2.32446	18.6156	6.38452	9.62572	3.26689	0.0317404	0.0640392
hsa-miR-361-3p	0	2.18015	2.07088	0	0	-170.344	-7.41231	0.0323274	0.0650329
hsa-miR-29c-3p	8.37581	25.2413	39.2622	64.9048	125.907	3.9204	1.971	0.0328023	0.0655861
hsa-miR-542-5p	21.5126	45.0564	38.8819	106.946	121.248	3.23704	1.69468	0.0327134	0.0655861
hsa-miR-3064-3p	0	0	0	0	2.01314	165.495	7.37064	0.0328884	0.0655861
hsa-miR-224-3p	0	3.48824	1.05657	0	0	-181.779	-7.50604	0.0332053	0.0660268
hsa-miR-4466	0	1.30809	3.29651	0	0	-184.373	-7.52648	0.0336473	0.0667129
hsa-miR-548h-5p	0	4.99012	0	0	0	-199.04	-7.63691	0.0342419	0.0671348
hsa-miR-4488	4.93732	0	0	0	0	-195.833	-7.61348	0.0346522	0.0671348
hsa-miR-2682-5p	0	2.66463	1.69052	0	0	-174.405	-7.4463	0.0343996	0.0671348
hsa-miR-6810-3p	5.11365	0	0	0	0	-202.836	-7.66417	0.0347333	0.0671348
hsa-miR-4775	0	2.85842	1.4792	0	0	-173.674	-7.44023	0.0343155	0.0671348
hsa-miR-95-3p	0	3.29445	0.760732	0	0	-162.324	-7.34273	0.0347384	0.0671348
hsa-miR-651-5p	0	1.64722	2.19767	0	0	-154.295	-7.26955	0.034232	0.0671348
hsa-miR-6833-3p	0	2.47084	1.73278	0	0	-168.422	-7.39594	0.0345415	0.0671348
hsa-miR-6516-5p	0	1.74412	2.45125	0	0	-168.172	-7.39379	0.0343377	0.0671348
hsa-miR-4662a-5p	0	1.88946	2.2822	0	0	-167.224	-7.38564	0.0348915	0.0672419
hsa-miR-433-5p	0	1.50188	2.23993	0	0	-150.22	-7.23093	0.0351333	0.0675188
hsa-miR-4781-3p	4.76099	0	0	0	0	-188.83	-7.56094	0.0353157	0.0675439
hsa-miR-758-5p	0	3.29445	0.972046	0	0	-170.744	-7.41569	0.0355391	0.0675439
hsa-miR-9-5p	0	0	4.69118	0	0	-187.349	-7.54958	0.0355145	0.0675439
hsa-miR-4745-5p	5.28999	0	0	0	0	-209.839	-7.71314	0.0354516	0.0675439
hsa-miR-429	0	2.27704	1.43694	0	0	-149.017	-7.21933	0.0366699	0.0695011
hsa-miR-15b-3p	3.17399	15.6486	14.4539	39.73	47.0499	3.89587	1.96195	0.0372777	0.0703553
hsa-miR-4521	0	1.79257	2.02862	0	0.0575182	-34.1228	-5.09267	0.0373251	0.0703553
hsa-miR-196b-5p	2380.14	2471.27	1555.02	491.752	414.189	-4.71423	-2.23702	0.038285	0.0719674
hsa-miR-590-5p	0	0	4.52213	0	0	-180.642	-7.49699	0.0395297	0.0741047
hsa-miR-3679-5p	0	1.30809	2.32446	0	0	-145.896	-7.18879	0.0402386	0.0750955
hsa-miR-6879-3p	3.08583	0	0.507155	0	0	-142.004	-7.14979	0.0402765	0.0750955
hsa-miR-190b-5p	0	2.51928	1.01431	6.37179	15.76	9.25988	3.21099	0.0404548	0.075224
hsa-miR-6797-3p	2.73316	0.775164	0	0	0	-138.694	-7.11576	0.0421933	0.0782452
hsa-miR-6734-3p	3.08583	0	1.01431	0	0	-162.32	-7.3427	0.0424307	0.0784739
hsa-miR-139-3p	256.035	80.5686	118.125	26.0494	52.8592	-3.83941	-1.94088	0.0429095	0.0789351
hsa-miR-6788-3p	2.82133	0	0.633943	0	0	-136.58	-7.0936	0.042847	0.0789351
hsa-miR-548j-5p	0	1.35654	2.19767	0	0	-142.797	-7.15782	0.0435134	0.0796202
hsa-miR-127-5p	0	0	3.97271	0	0	-158.847	-7.3115	0.043468	0.0796202
hsa-miR-766-5p	1.76333	0.968955	0.633943	0	0	-128.192	-7.00216	0.0436439	0.0796472
hsa-miR-1292-5p	0.793498	1.93791	0.549418	0	0	-131.745	-7.04161	0.0440197	0.0801205
hsa-miR-6875-3p	4.49649	0	0	0	0	-178.324	-7.47836	0.0443714	0.0801247
hsa-miR-103a-1-5p	0	0	0	0	1.49547	123.281	6.9458	0.0442892	0.0801247
hsa-miR-1292-3p	4.49649	0	0	0	0	-178.324	-7.47836	0.0443576	0.0801247
hsa-miR-1537-3p	0	2.37394	1.18336	0	0	-142.764	-7.15749	0.0450976	0.0809636
hsa-miR-29b-3p	43.9951	119.472	341.695	377.56	625.05	2.97651	1.57362	0.0451409	0.0809636
hsa-miR-7976	0	0	3.97271	0	0	-158.847	-7.3115	0.045189	0.0809636
hsa-miR-6513-3p	0	1.88946	1.60599	0	0	-140.421	-7.13362	0.0454572	0.0812325
hsa-miR-297	0	0	0	0	1.49547	123.281	6.9458	0.0457383	0.0815233
hsa-miR-6741-3p	4.23199	0	0	0	0	-167.818	-7.39075	0.0461377	0.0820226
hsa-miR-19a-5p	0	0	0	0	1.49547	123.281	6.9458	0.0465357	0.0823579
hsa-miR-6733-3p	4.32016	0	0	0	0	-171.32	-7.42055	0.0465657	0.0823579
hsa-miR-6500-3p	3.87932	0	0	0	0	-153.809	-7.26499	0.0472926	0.0830356
hsa-miR-7114-3p	0	1.45343	1.90183	0	0	-134.921	-7.07597	0.0471351	0.0830356
hsa-miR-6895-3p	4.32016	0	0	0	0	-171.32	-7.42055	0.047311	0.0830356
hsa-miR-4695-3p	0.176333	1.0174	1.8173	0	0	-122.679	-6.93874	0.0488311	0.0854854
hsa-miR-137-5p	4.14382	0	0	0	0	-164.316	-7.36033	0.0496173	0.0866414
hsa-miR-26a-1-3p	0.0881664	2.37394	0.59168	0	0	-123.075	-6.9434	0.0497905	0.0867237
hsa-miR-1281	3.96749	0	0	0	0	-157.311	-7.29748	0.0501289	0.0868733
hsa-miR-4677-5p	0	1.16275	2.19767	0	0	-135.126	-7.07817	0.0501041	0.0868733
hsa-miR-4684-3p	0	1.21119	2.15541	0	0	-135.373	-7.0808	0.0513764	0.0888114
hsa-miR-3115	0.0881664	1.35654	1.1411	0	0	-105.365	-6.71926	0.051624	0.0890158
hsa-miR-548e-3p	0	1.21119	1.4792	0	0	-108.639	-6.7634	0.0532237	0.0915448
hsa-miR-4485-5p	3.43849	0	0	0	0	-136.295	-7.09059	0.0545988	0.0936757
hsa-miR-1236-3p	3.35032	0	0	0	0	-132.791	-7.05302	0.0552296	0.0942878
hsa-miR-744-3p	14.9001	34.9793	30.8519	55.7844	109.055	3.05669	1.61197	0.0551162	0.0942878
hsa-miR-23a-3p	3022.79	5682.97	3388.13	9584.55	10355.9	2.47317	1.30636	0.0569956	0.0968625
hsa-miR-597-3p	0	2.95531	0	0	0	-118.31	-6.88642	0.0570193	0.0968625
hsa-miR-3688-3p	0	0.968955	2.07088	0	0	-122.439	-6.93592	0.057599	0.0976061
hsa-miR-1468-5p	0	1.40498	2.02862	0	0.0575182	-30.7105	-4.94066	0.058127	0.098259
hsa-miR-125b-1-3p	225.53	90.355	101.896	336.705	401.42	2.6517	1.40692	0.0591304	0.0997101
hsa-miR-140-3p	0	3.1491	5.19834	16.3668	25.5956	7.49581	2.90608	0.0602445	0.10134
hsa-miR-1271-3p	0	0	2.74709	0	0	-110.239	-6.7845	0.0611777	0.102659
hsa-miR-6513-5p	0	1.0174	1.4792	0	0	-100.994	-6.65813	0.0613447	0.102689
hsa-miR-548aq-3p	0	1.16275	1.31015	0	0	-100.048	-6.64455	0.061578	0.102829
hsa-miR-454-5p	0	0.726716	1.77504	0	0	-101.157	-6.66045	0.0619583	0.10301
hsa-miR-570-3p	0	1.55033	0.887521	0	0	-98.5268	-6.62244	0.061986	0.10301
hsa-let-7f-1-3p	63.3917	192.241	178.772	294.227	473.835	2.65114	1.40661	0.0632491	0.104856
hsa-miR-1285-3p	3.08583	0	0	0	0	-122.281	-6.93406	0.0645764	0.106799
hsa-miR-652-5p	0	1.40498	0.887521	0	0	-92.8182	-6.53634	0.0655151	0.108092
hsa-miR-1255a	0	1.74412	0.633943	0	0	-96.0257	-6.58535	0.0658271	0.108294
hsa-miR-26a-2-3p	0	0.629821	1.64825	0	0	-92.312	-6.52845	0.0663879	0.108294
hsa-miR-6770-3p	0	1.84101	0.507155	0	0	-94.7602	-6.56621	0.0664244	0.108294
hsa-miR-551a	0	0	2.91614	0	0	-116.943	-6.86966	0.0663408	0.108294
hsa-miR-1233-3p	0.617165	0.193791	1.39468	0	0	-89.0805	-6.47704	0.0659576	0.108294
hsa-miR-3064-5p	0	0	0.972046	0.687154	7.53488	12.2332	3.61273	0.0668639	0.108753
hsa-miR-30e-5p	2.73316	16.3753	18.0885	46.1642	43.0811	3.58755	1.843	0.0678501	0.110096
hsa-miR-126-3p	213327	368819	362307	520341	648565	1.85648	0.89257	0.0689502	0.111618
hsa-miR-3909	0	6.44355	2.9584	0	0.460146	-13.1398	-3.71587	0.0716792	0.115764
hsa-let-7e-3p	165.312	248.876	191.874	349.137	583.637	2.30805	1.20668	0.0748653	0.120626
hsa-miR-574-5p	705.243	336.13	411.345	192.903	180.377	-2.59389	-1.37511	0.0756371	0.121585
hsa-miR-6851-3p	0	2.32549	0	0	0	-93.3289	-6.54425	0.076109	0.122058
hsa-miR-548s	0	0.387582	1.64825	0	0	-82.6436	-6.36883	0.076836	0.122938
hsa-miR-548c-5p	0	2.32549	0	0	0	-93.3289	-6.54425	0.0771208	0.123107
hsa-miR-128-1-5p	0	0.339134	1.73278	0	0	-84.0273	-6.39279	0.0777936	0.123893
hsa-miR-3162-3p	2.29233	0	0	0	0	-90.7381	-6.50364	0.0798002	0.126504
hsa-miR-2277-3p	0	0	2.15541	0	0	-86.7835	-6.43935	0.0797595	0.126504
hsa-miR-656-5p	0	0.775164	1.22562	0	0	-81.4486	-6.34782	0.0803385	0.126818
hsa-miR-6878-3p	0	0.678268	1.1411	0	0	-74.3074	-6.21543	0.0803671	0.126818
hsa-miR-222-3p	4745.91	4971.76	3945.45	1742.18	2285.95	-2.26122	-1.1771	0.0831553	0.130618
hsa-let-7b-5p	7227.71	4088.65	2714.21	10498.3	11468.8	2.34853	1.23176	0.0830527	0.130618
hsa-miR-19b-1-5p	0	1.21119	0.59168	0	0	-73.4281	-6.19826	0.0843791	0.131938
hsa-miR-338-3p	2.82133	0.43603	0.126789	9.37028	7.24729	7.52587	2.91186	0.0842289	0.131938
hsa-miR-4683	0	1.98636	0	0	0	-79.8806	-6.31977	0.0850751	0.132725
hsa-miR-4423-5p	0	1.93791	0	0	0	-77.9597	-6.28466	0.0857258	0.132953
hsa-miR-628-5p	0	0.532925	1.1411	0	0	-68.551	-6.09911	0.0857781	0.132953
hsa-miR-619-5p	0	2.08325	0	0	0	-83.7228	-6.38755	0.0859203	0.132953
hsa-miR-1228-5p	0	2.08325	0	0	0	-83.7228	-6.38755	0.0861876	0.132953
hsa-miR-5189-5p	0	0	2.07088	0	0	-83.4335	-6.38255	0.0861022	0.132953
hsa-miR-4677-3p	0	1.40498	0.380366	0	0	-72.5046	-6.18	0.087095	0.13376
hsa-miR-550a-3p	0	0.43603	1.26789	0	0	-69.6457	-6.12196	0.0870993	0.13376
hsa-miR-3174	0	1.1143	0.507155	0	0	-66.2567	-6.04999	0.0878315	0.134584
hsa-miR-579-5p	0	0.872059	0.760732	0	0	-66.9621	-6.06527	0.0881563	0.134781
hsa-miR-30a-5p	250.216	903.357	1085.14	3434.58	3069.86	4.35785	2.12362	0.0912204	0.139157
hsa-miR-374b-5p	23.0114	69.8132	54.3923	21.6766	13.2292	-2.81431	-1.49278	0.0922981	0.140489
hsa-miR-132-5p	71.503	172.571	96.3171	39.9174	43.0236	-2.73687	-1.45252	0.0935044	0.142011
hsa-miR-6870-3p	0	1.1143	0.464892	0	0	-64.5533	-6.01242	0.0943704	0.143011
hsa-miR-1285-5p	0	0	1.73278	0	0	-70.0368	-6.13004	0.0949556	0.143581
hsa-miR-576-3p	0	0.775164	0.760732	0	0	-63.2005	-5.98186	0.0963918	0.143856
hsa-miR-3158-3p	0	0.484477	1.01431	0	0	-61.6796	-5.94672	0.0961069	0.143856
hsa-miR-6827-3p	0	1.69567	0	0	0	-68.356	-6.095	0.0959917	0.143856
hsa-miR-323b-5p	0	0.484477	1.01431	0	0	-61.6796	-5.94672	0.0962754	0.143856
hsa-miR-3189-3p	0	0.726716	0.676206	0	0	-58.0068	-5.85815	0.0961805	0.143856
hsa-miR-4701-5p	0	0.678268	0.718469	0	0	-57.7908	-5.85277	0.096379	0.143856
hsa-miR-5002-5p	0	0	1.90183	0	0	-76.7344	-6.2618	0.0966285	0.143897
hsa-miR-103a-2-5p	10.58	1.16275	6.88885	0	1.95562	-6.28537	-2.652	0.0986154	0.146539
hsa-miR-216b-5p	0	1.45343	0.0422629	0	0	-60.5824	-5.92083	0.099102	0.146861
hsa-miR-1303	0	1.45343	0.0422629	0	0	-60.5824	-5.92083	0.0992589	0.146861
hsa-miR-6812-3p	0	0.872059	0.507155	0	0	-56.8795	-5.82984	0.100215	0.14764
hsa-miR-6716-3p	0	0.920507	0.464892	0	0	-57.0423	-5.83396	0.100184	0.14764
hsa-miR-4804-3p	0	0.629821	0.718469	0	0	-55.9156	-5.80518	0.100785	0.148163
hsa-miR-3176	0	0	1.64825	0	0	-66.6886	-6.05937	0.101154	0.148387
hsa-miR-338-5p	0	4.31185	0	10.8695	9.20291	6.94226	2.79541	0.101804	0.149024
hsa-miR-329-5p	0	0.629821	0.718469	0	0	-55.9156	-5.80518	0.102152	0.149216
hsa-miR-4454	68.5935	8.04233	3.04293	6.12192	8.34014	-3.66568	-1.87408	0.102459	0.149347
hsa-miR-548f-3p	0	0	1.56373	0	0	-63.3409	-5.98507	0.103954	0.150569
hsa-miR-30b-3p	0	0.823612	0.507155	0	0	-55.0206	-5.7819	0.103817	0.150569
hsa-miR-4797-3p	0	0	1.56373	0	0	-63.3409	-5.98507	0.103882	0.150569
hsa-miR-5582-3p	0	1.50188	0	0	0	-60.6746	-5.92302	0.104507	0.151052
hsa-miR-3960	2.11599	0	0.253577	0.0624685	0	-20.0616	-4.32636	0.107373	0.154545
hsa-miR-23b-5p	35.4429	21.3655	16.0599	2.49874	13.6893	-2.99368	-1.58192	0.107304	0.154545
hsa-miR-486-5p	17.457	9.15662	8.95973	4.74761	0.0575182	-4.92286	-2.2995	0.109631	0.157466
hsa-miR-548n	0	0	1.4792	0	0	-59.9938	-5.90674	0.110325	0.158133
hsa-miR-106b-5p	0	2.61618	7.94542	11.3068	29.3918	5.75642	2.52517	0.110565	0.158148
hsa-miR-3200-5p	0	0	1.35241	0	0	-54.9744	-5.78069	0.111919	0.159613
hsa-miR-196a-5p	0.528999	1.98636	1.26789	0	0.230073	-10.2189	-3.35316	0.112518	0.159613
hsa-miR-5690	0	0	1.43694	0	0	-58.3205	-5.86593	0.112499	0.159613
hsa-miR-184	0	0	1.35241	0	0	-54.9744	-5.78069	0.112394	0.159613
hsa-miR-940	0	3.05221	11.9181	1.06197	0.0575182	-8.82056	-3.14087	0.112951	0.159898
hsa-miR-502-3p	5.11365	0	0.0422629	0.0624685	0.172555	-13.5752	-3.7629	0.113744	0.160361
hsa-miR-3934-5p	0	0.726716	0.464892	0	0	-49.6348	-5.63328	0.113744	0.160361
hsa-miR-223-3p	0.0881664	0.0484477	1.90183	0	0.0575182	-18.395	-4.20124	0.117563	0.165406
hsa-miR-4785	0	0	1.31015	0	0	-53.3016	-5.73611	0.118127	0.16586
hsa-miR-3194-3p	0	0.678268	0.422629	0	0	-46.1093	-5.52699	0.118887	0.16606
hsa-miR-4435	0	0.678268	0.422629	0	0	-46.1093	-5.52699	0.11894	0.16606
hsa-miR-5586-5p	0	0.678268	0.422629	0	0	-46.1093	-5.52699	0.118994	0.16606
hsa-miR-3691-5p	0	1.30809	0	0	0	-52.9951	-5.72779	0.120051	0.166849
hsa-miR-1185-2-3p	0	1.30809	0	0	0	-52.9951	-5.72779	0.120235	0.166849
hsa-miR-582-3p	0	0	1.26789	0	0	-51.629	-5.69011	0.120411	0.166849
hsa-miR-6805-5p	0	0	1.26789	0	0	-51.629	-5.69011	0.120592	0.166849
hsa-miR-6799-3p	0	0	1.26789	0	0	-51.629	-5.69011	0.120772	0.166849
hsa-miR-96-5p	2.64499	3.92427	6.42396	14.8675	10.4683	2.87603	1.52408	0.122231	0.168527
hsa-miR-490-5p	0	0	0.929784	0	7.41985	11.6327	3.54012	0.122966	0.169201
hsa-miR-122-3p	0	1.21119	0	0	0	-49.1562	-5.6193	0.123749	0.169939
hsa-miR-7977	3936.19	80.9562	87.0616	172.663	393.424	-4.83323	-2.27299	0.126065	0.172774
hsa-miR-1276	0	1.0174	0.929784	0	0.0575182	-17.6256	-4.1396	0.126675	0.173266
hsa-miR-4804-5p	0	0	1.18336	0	0	-48.2846	-5.59349	0.128552	0.175483
hsa-miR-6740-3p	0	0.387582	0.633943	0	0	-43.2376	-5.43421	0.129313	0.176173
hsa-miR-4524a-5p	0	0.290686	0.718469	0	0	-42.4912	-5.40909	0.132502	0.18016
hsa-miR-548au-5p	0	0	1.09884	0	0	-44.9412	-5.48997	0.133815	0.181588
hsa-miR-6807-3p	0	0	1.1411	0	0	-46.6128	-5.54265	0.134454	0.182095
hsa-miR-1910-3p	0	0	1.1411	0	0	-46.6128	-5.54265	0.134922	0.18237
hsa-miR-2277-5p	0	1.1143	0	0	0	-45.3181	-5.50202	0.136425	0.182964
hsa-miR-4787-3p	0	0.872059	0.845258	0	0.0575182	-15.6204	-3.96536	0.135652	0.182964
hsa-miR-6786-3p	0	0	1.09884	0	0	-44.9412	-5.48997	0.13642	0.182964
hsa-miR-3611	0	0	1.1411	0	0	-46.6128	-5.54265	0.136415	0.182964
hsa-miR-874-5p	0	0	1.1411	0	0	-46.6128	-5.54265	0.136964	0.183185
hsa-miR-1268b	0	0	1.1411	0	0	-46.6128	-5.54265	0.137158	0.183185
hsa-miR-3622a-3p	0	1.93791	0	0	0.0575182	-17.4484	-4.12503	0.137389	0.183185
hsa-miR-33a-5p	19.8374	17.2474	47.4612	42.1038	103.13	2.57423	1.36414	0.137666	0.183199
hsa-miR-10525-3p	0	0	1.05657	0	0	-43.27	-5.4353	0.138048	0.183246
hsa-miR-767-5p	0	0	1.05657	0	0	-43.27	-5.4353	0.138234	0.183246
hsa-miR-210-3p	0	0	1.98636	0	0.0575182	-17.9286	-4.16419	0.140359	0.185705
hsa-miR-129-2-3p	4.84915	1.59878	0.845258	0.937028	0	-5.10293	-2.35133	0.141243	0.186516
hsa-miR-6505-3p	0	0.0484477	0.929784	0	0	-40.4863	-5.33936	0.142271	0.187514
hsa-miR-4645-5p	0	0	1.01431	0	0	-41.5992	-5.37848	0.144026	0.188384
hsa-miR-5001-5p	0	1.06585	0	0	0	-43.3994	-5.4396	0.143792	0.188384
hsa-miR-374b-3p	7.05332	3.77892	7.98769	1.99899	1.09285	-4.04863	-2.01743	0.143712	0.188384
hsa-miR-26b-5p	275.52	914.257	771.594	2181.71	2079.63	3.25865	1.70428	0.143498	0.188384
hsa-miR-4727-5p	0	1.06585	0	0	0	-43.3994	-5.4396	0.145595	0.190075
hsa-miR-99b-3p	83.7581	67.5846	53.4626	146.739	166.228	2.29764	1.20015	0.147211	0.191821
hsa-miR-17-3p	0	0.920507	5.15607	0	0.460146	-8.51485	-3.08998	0.14982	0.194851
hsa-miR-141-3p	0	0	0.972046	0	0	-39.9287	-5.31936	0.150651	0.19546
hsa-miR-5001-3p	0	0	0.972046	0	0	-39.9287	-5.31936	0.150856	0.19546
hsa-miR-6777-3p	0	1.84101	0	0	0.0575182	-16.5876	-4.05203	0.152282	0.196936
hsa-miR-499b-5p	0	0	0.972046	0	0	-39.9287	-5.31936	0.154448	0.199243
hsa-miR-1256	0	0	0.972046	0	0	-39.9287	-5.31936	0.154645	0.199243
hsa-miR-6850-5p	0	1.79257	0	0	0.0575182	-16.1572	-4.01411	0.155638	0.199775
hsa-miR-10b-5p	496.906	1341.08	1202.89	3295.53	2708.76	2.96158	1.56637	0.155518	0.199775
hsa-miR-139-5p	4133.33	7900.62	5663.23	2830.45	3156.02	-1.97082	-0.978797	0.157722	0.202071
hsa-miR-20a-3p	0	0	0.929784	0	0	-38.2587	-5.25772	0.159617	0.203455
hsa-miR-219b-5p	0	0	0.929784	0	0	-38.2587	-5.25772	0.159688	0.203455
hsa-miR-4524a-3p	0	0	0.929784	0	0	-38.2587	-5.25772	0.159447	0.203455
hsa-miR-4479	0	0	0.929784	0	0	-38.2587	-5.25772	0.161809	0.205444
hsa-miR-1193	0	0	0.929784	0	0	-38.2587	-5.25772	0.161847	0.205444
hsa-miR-671-5p	0	22.5282	13.1438	44.7899	34.626	3.33642	1.7383	0.162648	0.206081
hsa-miR-125a-3p	3.61482	17.2958	10.6925	21.4267	28.0114	2.33724	1.22481	0.166951	0.210933
hsa-miR-190a-5p	0	0	0.464892	1.06197	1.84058	8.41765	3.07342	0.167091	0.210933
hsa-let-7e-5p	1927.49	1759.43	1414.45	4697.45	3088.73	2.28952	1.19505	0.167987	0.211677
hsa-miR-181a-3p	127.841	233.276	171.376	43.2907	101.462	-2.45238	-1.29418	0.170923	0.214982
hsa-miR-33b-5p	0	0.823612	0.422629	0	0.0575182	-11.4671	-3.51943	0.175118	0.219856
hsa-miR-98-5p	1283.44	1636.13	1242.57	2987.99	3240.4	2.24454	1.16642	0.176985	0.221795
hsa-miR-422a	1.587	1.40498	1.05657	6.05945	4.77401	4.15036	2.05324	0.17853	0.223324
hsa-miR-181c-3p	0.0881664	0.775164	0.0422629	1.74912	2.41576	6.6012	2.72273	0.182271	0.227591
hsa-miR-192-5p	14.7238	53.8254	46.2356	97.0761	77.1894	2.27409	1.18529	0.185447	0.231137
hsa-miR-1306-3p	10.1391	2.27704	1.39468	13.1809	11.5612	2.71029	1.43844	0.201825	0.251095
hsa-miR-32-5p	3.70299	17.0536	42.2206	22.4887	79.7202	2.43171	1.28197	0.202412	0.251371
hsa-miR-30d-3p	0.176333	8.72059	5.45191	5.93451	25.0779	3.23131	1.69212	0.206685	0.256215
hsa-miR-16-5p	1019.56	1348.2	1934.25	3124.8	2980.36	2.12855	1.08987	0.209193	0.258857
hsa-miR-210-5p	0	1.06585	0.549418	0	0.115036	-8.29257	-3.05182	0.221642	0.273279
hsa-miR-130a-3p	38.4406	67.8268	64.5777	91.5164	142.703	2.05358	1.03814	0.221526	0.273279
hsa-miR-146b-5p	7.05332	2.61618	5.87454	13.6806	12.0788	2.50635	1.32559	0.227093	0.279499
hsa-miR-122-5p	0.528999	13.1293	1.52146	2.06146	0	-4.88609	-2.28868	0.229247	0.281646
hsa-miR-320a-3p	294.652	574.881	367.011	213.143	209.596	-1.95036	-0.963741	0.235572	0.288901
hsa-miR-148a-3p	0	1.40498	1.01431	0.0624685	0.172555	-6.52527	-2.70604	0.236241	0.289207
hsa-miR-378a-3p	372.062	541.694	400.483	1097.57	868.122	2.24307	1.16547	0.243476	0.297533
hsa-let-7g-5p	4694.33	6584.19	3480.43	7786.08	9399.8	1.74666	0.804595	0.246495	0.300689
hsa-miR-24-1-5p	2.64499	3.92427	9.59368	9.80756	15.875	2.36452	1.24155	0.247851	0.301808
hsa-miR-4286	7.58231	1.64722	0.549418	0	1.61051	-3.99026	-1.99648	0.249476	0.302182
hsa-miR-29a-5p	9.69831	4.74788	8.95973	16.929	18.4633	2.28267	1.19072	0.248987	0.302182
hsa-miR-30c-2-3p	5.46632	10.8523	17.9195	22.1763	23.64	1.99605	0.997151	0.249409	0.302182
hsa-miR-101-3p	0	6.54045	7.31148	0.249874	1.84058	-4.39128	-2.13464	0.260397	0.314856
hsa-miR-10b-3p	4.58466	2.2286	2.70483	4.62267	13.1717	2.83656	1.50414	0.273537	0.330164
hsa-miR-4791	0	0	0.676206	1.24937	1.84058	6.4212	2.68284	0.278409	0.335456
hsa-miR-148b-5p	0	0.0484477	1.8173	3.3733	1.72555	4.00925	2.00333	0.290104	0.348936
hsa-miR-29b-2-5p	0.0881664	6.29821	0.718469	11.994	2.64584	3.07498	1.62058	0.292531	0.351242
hsa-miR-450a-1-3p	0	1.06585	0.126789	0.0624685	0.0575182	-6.03771	-2.594	0.299732	0.359261
hsa-miR-30a-3p	392.253	622.311	629.294	1339.89	1238.25	2.35188	1.23381	0.300666	0.359753
hsa-miR-423-5p	174.834	58.5733	78.1441	217.89	193.376	1.98142	0.986535	0.301598	0.360242
hsa-miR-21-5p	132566	291005	257965	366362	276913	1.41579	0.501607	0.312997	0.37321
hsa-miR-15b-5p	52.1064	112.011	95.2606	145.926	202.579	2.01363	1.0098	0.313755	0.373466
hsa-miR-107	0	0.0484477	2.32446	0.249874	0.0575182	-4.98513	-2.31763	0.316233	0.375766
hsa-miR-186-5p	16.7516	23.3518	14.623	6.99648	15.7025	-1.60577	-0.683265	0.318641	0.377534
hsa-let-7g-3p	5.28999	1.69567	3.80366	7.18388	11.1585	2.58084	1.36784	0.318819	0.377534
hsa-miR-219a-5p	0	0.242239	0.126789	0	1.38044	5.18831	2.37527	0.32291	0.381722
hsa-miR-1246	0	0.0484477	1.05657	0	0.115036	-5.7368	-2.52025	0.324235	0.381975
hsa-miR-378a-5p	0	2.61618	4.94476	9.30781	5.40671	2.90157	1.53684	0.323956	0.381975
hsa-miR-425-3p	12.5196	47.1397	34.6133	43.1658	74.4861	1.86946	0.902619	0.32576	0.383116
hsa-miR-132-3p	0.264499	0.775164	5.15607	0.249874	0.977809	-3.34661	-1.7427	0.333942	0.391401
hsa-miR-29a-3p	212.834	680.352	839.383	1325.58	1284.15	2.25921	1.17582	0.333521	0.391401
hsa-miR-378d	0	0	0.845258	0.312343	2.64584	5.04435	2.33467	0.340496	0.398404
hsa-miR-17-5p	5.46632	21.317	21.6809	26.6741	32.7279	1.83303	0.874233	0.341155	0.398497
hsa-miR-34c-3p	0	0	0.380366	0.249874	1.09285	4.76255	2.25174	0.342325	0.399186
hsa-miR-324-5p	0	11.8213	17.8349	18.5532	27.4937	2.32655	1.21819	0.343302	0.399648
hsa-miR-185-5p	3.43849	42.1495	55.0685	81.6464	49.5807	1.95413	0.966526	0.344754	0.40066
hsa-miR-31-3p	102.978	246.066	317.31	313.967	382.611	1.56759	0.648547	0.346306	0.401786
hsa-miR-505-5p	16.399	8.86594	8.70616	7.99597	2.18569	-2.21847	-1.14957	0.347845	0.402892
hsa-miR-23a-5p	0	0.920507	2.32446	2.43627	5.23416	3.48465	1.80102	0.348941	0.403481
hsa-miR-193a-3p	0	6.05597	21.1314	18.2408	25.7106	2.422	1.2762	0.354511	0.409234
hsa-miR-212-3p	0.0881664	26.1133	9.08652	1.68665	6.9597	-2.71823	-1.44267	0.361869	0.417029
hsa-miR-221-5p	0	11.7728	13.1438	3.56071	2.87591	-2.57861	-1.36659	0.377632	0.43374
hsa-miR-9985	0.793498	7.41251	16.6938	3.31083	4.08379	-2.24715	-1.1681	0.377296	0.43374
hsa-miR-5100	208.249	12.7418	15.0879	35.1073	47.28	-1.90941	-0.933126	0.390654	0.44795
hsa-miR-26b-3p	0	2.37394	6.7198	2.1864	14.1495	2.68434	1.42457	0.394866	0.452026
hsa-miR-320b	7.58231	4.11806	7.14243	2.24887	3.39357	-2.20179	-1.13868	0.412243	0.471135
hsa-let-7f-2-3p	0	0.775164	5.32512	0.749622	0.747737	-2.70833	-1.4374	0.417055	0.475177
hsa-miR-130a-5p	0	0.872059	1.77504	0.43728	0	-3.97153	-1.9897	0.417161	0.475177
hsa-miR-31-5p	1733.53	1853.76	1980.57	2892.23	3002.22	1.58755	0.666799	0.438314	0.498446
hsa-miR-424-5p	12.7841	130.954	120.661	95.8892	192.053	1.63312	0.707631	0.445164	0.5054
hsa-miR-760	17.8978	4.16651	0	4.18539	2.64584	-2.14679	-1.10218	0.446939	0.50658
hsa-miR-191-5p	954.49	1454.5	1286.31	2823.39	1843.69	1.89432	0.92168	0.453418	0.512495
hsa-miR-361-5p	25.8328	40.8899	38.2479	50.4121	57.7483	1.53918	0.622166	0.453648	0.512495
hsa-miR-221-3p	2959.04	2140.23	1388.76	1375.68	1372.73	-1.57369	-0.654147	0.454824	0.51256
hsa-miR-23b-3p	225.001	464.033	629.168	650.11	680.038	1.51334	0.597739	0.455195	0.51256
hsa-let-7a-3p	21.8653	72.817	270.567	155.234	257.336	1.694	0.760431	0.46483	0.522554
hsa-miR-425-5p	311.404	445.768	468.315	642.114	548.148	1.45629	0.542294	0.4683	0.525596
hsa-miR-28-5p	45.9347	100.771	93.4433	100.387	147.017	1.54395	0.626629	0.473424	0.529619
hsa-miR-10395-3p	9.08114	1.69567	3.71913	4.43527	0	-2.17133	-1.11858	0.473041	0.529619
hsa-miR-203a-3p	0	3.246	0.887521	0.874559	0	-3.12345	-1.64314	0.474535	0.53
hsa-miR-98-3p	0	0.0484477	6.84659	0.687154	1.03533	-2.65677	-1.40968	0.475584	0.530311
hsa-miR-491-5p	0	1.55033	2.32446	0.812091	0	-3.15554	-1.65789	0.482417	0.53706
hsa-miR-331-3p	0.0881664	23.4003	30.3025	37.2937	28.8166	1.84234	0.881538	0.486474	0.540407
hsa-miR-4485-3p	37.0299	3.1491	5.95907	29.1728	22.5471	1.68493	0.752688	0.486994	0.540407
hsa-miR-200b-3p	0.0881664	2.61618	2.74709	1.37431	0	-2.63781	-1.39934	0.488852	0.541595
hsa-miR-1268a	5.55449	0.968955	7.35374	4.3728	0.0575182	-2.0843	-1.05956	0.504492	0.558023
hsa-miR-34a-5p	12491.7	19458	17123	13009.9	13247.8	-1.24594	-0.31723	0.505543	0.558288
hsa-miR-194-5p	0	7.80009	12.4253	13.6806	14.7822	2.10743	1.07548	0.507751	0.559828
hsa-miR-877-5p	18.1623	12.2088	5.95907	18.4907	17.0829	1.47672	0.562397	0.509169	0.560493
hsa-miR-22-5p	40.0276	38.4191	45.7707	58.0957	65.2256	1.48542	0.570872	0.511699	0.561482
hsa-miR-15a-5p	34.7376	23.4972	36.0925	33.1708	59.8189	1.48003	0.565622	0.510944	0.561482
hsa-miR-10527-5p	0	6.29821	0.887521	1.87406	0	-2.54598	-1.34822	0.515019	0.564224
hsa-miR-18a-5p	0	8.91439	11.7913	14.6801	13.5743	2.04361	1.03112	0.519137	0.567831
hsa-miR-19a-3p	0	1.16275	0.549418	0	3.04846	2.63633	1.39853	0.533855	0.583004
hsa-miR-25-5p	17.3688	1.35654	1.56373	5.24736	2.12817	-1.82461	-0.86759	0.535078	0.583414
hsa-miR-148b-3p	14.6356	22.2375	14.5807	24.2378	25.7682	1.45281	0.538848	0.536258	0.583775
hsa-miR-27a-5p	41.4382	27.0338	45.1368	16.0544	37.9045	-1.40258	-0.488083	0.545784	0.592799
hsa-miR-151a-3p	108.004	191.902	279.358	98.0756	161.224	-1.48967	-0.574989	0.546271	0.592799
hsa-miR-532-3p	0	4.50564	8.45258	5.5597	11.1585	1.93016	0.948721	0.55266	0.598787
hsa-miR-324-3p	6.17165	7.36406	7.39601	14.6801	9.26043	1.69925	0.764895	0.560536	0.606366
hsa-miR-378g	0.264499	3.58513	1.73278	2.49874	4.60146	1.88388	0.913704	0.56488	0.610105
hsa-miR-574-3p	224.472	148.153	150.709	107.446	133.845	-1.44454	-0.53061	0.570703	0.615428
hsa-miR-30e-3p	46.0229	97.6707	93.8236	86.4565	133.327	1.38683	0.471792	0.58574	0.630148
hsa-miR-144-3p	0	0	1.26789	0.312343	0	-2.64692	-1.40431	0.586184	0.630148
hsa-miR-34a-3p	0	1.25964	1.90183	0	0.920291	-2.27113	-1.18341	0.597551	0.641365
hsa-miR-212-5p	0	2.32549	1.18336	0.999497	0.0575182	-2.21027	-1.14422	0.610745	0.653964
hsa-miR-20a-5p	37.7352	25.2413	38.7973	57.0338	34.626	1.35156	0.434623	0.61214	0.653964
hsa-miR-200a-3p	0	0.0484477	2.87388	4.12292	0.0575182	2.12836	1.08974	0.611382	0.653964
hsa-miR-6514-3p	0	2.85842	1.94409	0	1.55299	-2.05143	-1.03663	0.626237	0.667986
hsa-miR-378h	0	0.290686	0.211314	0.374811	0.460146	2.09839	1.06928	0.630882	0.671899
hsa-miR-181b-5p	1486.22	1227.38	831.945	1864.81	1684.94	1.50192	0.586812	0.639091	0.67959
hsa-miR-582-5p	21.6008	65.5498	56.9704	57.8459	70.3448	1.33258	0.41422	0.642135	0.681773
hsa-miR-152-3p	30.2411	44.0874	37.8676	15.3048	42.3909	-1.29657	-0.374697	0.644949	0.683706
hsa-miR-151a-5p	2594.65	4870.21	3687.56	2503.18	3149.75	-1.31527	-0.395354	0.648342	0.686245
hsa-miR-32-3p	1.93966	3.05221	3.04293	2.06146	1.32292	-1.66616	-0.736524	0.651392	0.688414
hsa-miR-106b-3p	7.22965	10.8523	8.5371	6.99648	5.40671	-1.44842	-0.534484	0.652969	0.689023
hsa-miR-671-3p	3.35032	2.18015	0	4.3728	1.49547	1.59851	0.676724	0.716894	0.755319
hsa-miR-19b-3p	0	3.10066	15.0456	4.62267	3.33606	-1.52067	-0.604706	0.720937	0.758417
hsa-miR-421	0.0881664	13.2262	14.7075	7.24635	6.03941	-1.40703	-0.492655	0.724564	0.761069
hsa-miR-423-3p	3686.42	3287.28	2759.89	3957.76	4004.88	1.22718	0.29535	0.733741	0.768362
hsa-miR-29b-1-5p	12.2551	3.82737	5.02928	11.4317	7.5924	1.36335	0.447159	0.733492	0.768362
hsa-miR-339-5p	21.3363	9.59265	6.50849	15.4922	15.4149	1.24549	0.316711	0.743335	0.777225
hsa-let-7i-3p	12.0788	19.6213	41.0373	17.2413	22.3171	-1.22809	-0.296422	0.749445	0.782425
hsa-miR-874-3p	4.58466	16.3269	23.2023	15.3673	8.34014	-1.24371	-0.31465	0.754649	0.786664
hsa-miR-188-5p	0	4.11806	8.91747	1.43678	4.60146	-1.43994	-0.526012	0.760179	0.79123
hsa-miR-126-5p	938.973	1141.38	1908.76	1445.15	2018.31	1.30228	0.381035	0.761822	0.791743
hsa-miR-103a-3p	172.101	206.581	167.953	162.043	139.999	-1.2072	-0.271659	0.767511	0.796452
hsa-miR-30c-1-3p	0.0881664	1.0174	1.90183	1.24937	1.72555	1.44361	0.529679	0.770197	0.798035
hsa-miR-18a-3p	10.2273	3.87582	1.22562	7.12141	6.38452	1.33191	0.413499	0.77438	0.801163
hsa-miR-27b-3p	715.294	3114.08	2480.75	1850.94	3195.08	1.19949	0.262417	0.77583	0.801458
hsa-miR-326	0.176333	8.28456	37.4027	8.49572	15.5299	-1.27314	-0.34839	0.783913	0.808594
hsa-miR-151b	8.46398	7.17027	4.52213	3.56071	12.3089	1.18636	0.24654	0.794169	0.817946
hsa-miR-27b-5p	10.9326	2.18015	6.21264	6.68413	8.16758	1.16048	0.214726	0.830919	0.854518
hsa-miR-27a-3p	3371.22	11302.4	16211.3	5995.67	12449.4	-1.11629	-0.158711	0.840758	0.863345
hsa-miR-378f	0	0	0.972046	0.249874	0.230073	-1.36368	-0.447508	0.851689	0.873267
hsa-miR-7-1-3p	6.70065	19.912	16.9052	11.1194	21.1092	1.10769	0.147554	0.864963	0.885557
hsa-miR-499a-5p	0	2.51928	8.62163	4.12292	1.84058	-1.24757	-0.319118	0.867113	0.88644
hsa-miR-93-3p	0	1.25964	2.11314	1.43678	0.345109	-1.27355	-0.348852	0.871191	0.88797
hsa-miR-375-3p	1.49883	1.69567	1.56373	2.12393	1.61051	1.16193	0.216522	0.871034	0.88797
hsa-miR-1261	9.96281	18.8462	14.3271	6.43426	24.9054	1.08893	0.12291	0.898105	0.914048
hsa-miR-128-3p	35.7956	78.0493	34.8246	47.1013	59.5889	1.07585	0.105476	0.907943	0.922695
hsa-miR-1260b	205.251	71.5573	71.4243	51.8489	162.546	-1.08238	-0.114212	0.909412	0.922825
hsa-miR-1306-5p	34.2086	10.4647	9.80499	15.3048	23.3524	1.06796	0.0948611	0.919237	0.931422
hsa-miR-185-3p	0	7.5094	9.84725	5.74711	4.60146	-1.11934	-0.162647	0.921598	0.93244
hsa-miR-320c	8.64031	3.34289	1.01431	5.18489	4.08379	1.0795	0.110363	0.93757	0.945457
hsa-miR-129-5p	10.2273	4.65098	3.04293	4.43527	6.55707	-1.07428	-0.103367	0.938586	0.945457
hsa-miR-182-5p	0	3.68203	14.8343	6.87154	4.4289	-1.09346	-0.128901	0.936502	0.945457
hsa-miR-532-5p	335.473	517.616	536.696	481.507	475.906	1.033	0.0468371	0.950898	0.956459
hsa-let-7b-3p	6.70065	8.38146	45.7284	17.3038	21.8569	-1.03637	-0.0515368	0.956087	0.960274
hsa-miR-331-5p	0	3.19755	4.0995	1.68665	2.93343	-1.05665	-0.0795011	0.963264	0.966073
hsa-miR-23c	0.264499	0.920507	1.52146	0.624685	1.32292	1.04067	0.057513	0.977019	0.978441
hsa-let-7i-5p	26947.1	22342.9	17466.1	22179	22531.1	1.00464	0.00667585	0.988671	0.988671
hsa-miR-548ap-3p	0	0	0	0	0	#N/A	#N/A	#N/A	#N/A
hsa-miR-548t-3p	0	0	0	0	0	#N/A	#N/A	#N/A	#N/A
hsa-miR-548az-3p	0	0	0	0	0	#N/A	#N/A	#N/A	#N/A
hsa-miR-548bc	0	0	0	0	0	#N/A	#N/A	#N/A	#N/A
hsa-miR-553	0	0	0	0	0	#N/A	#N/A	#N/A	#N/A
hsa-miR-7844-5p	0	0	0	0	0	#N/A	#N/A	#N/A	#N/A
hsa-miR-548av-3p	0	0	0	0	0	#N/A	#N/A	#N/A	#N/A
hsa-miR-548g-3p	0	0	0	0	0	#N/A	#N/A	#N/A	#N/A
hsa-miR-6835-3p	0	0	0	0	0	#N/A	#N/A	#N/A	#N/A
hsa-miR-4422	0	0	0	0	0	#N/A	#N/A	#N/A	#N/A
hsa-miR-4429	0	0.0484477	0	0	0	-2.87383	-1.52298	0.611067	#N/A
hsa-miR-548an	0	0	0	0	0	#N/A	#N/A	#N/A	#N/A
hsa-miR-4484	0	0.581373	0	0	0	-24.2308	-4.59877	0.208226	#N/A
hsa-miR-548bb-5p	0	0	0	0	0	#N/A	#N/A	#N/A	#N/A
hsa-miR-548ak	0	0	0	0	0	#N/A	#N/A	#N/A	#N/A
hsa-miR-548y	0	0	0	0	0	#N/A	#N/A	#N/A	#N/A
hsa-miR-548ar-5p	0	0	0.676206	0	0	-28.2505	-4.8202	0.194648	#N/A
hsa-miR-548a-5p	0	0	0	0	0	#N/A	#N/A	#N/A	#N/A
hsa-miR-548i	0	0.0968955	0.0422629	0	0	-7.14892	-2.83773	0.336201	#N/A
hsa-miR-548as-5p	0	0.290686	0	0	0	-12.7573	-3.67325	0.269416	#N/A
hsa-miR-548ap-5p	0	0	0	0	0	#N/A	#N/A	#N/A	#N/A
hsa-miR-548ab	0.617165	0.484477	0.0845258	0	0	-45.5554	-5.50955	0.122719	#N/A
hsa-miR-548b-5p	0	0.0968955	0	0	0	-5.01159	-2.32527	0.440404	#N/A
hsa-miR-548ay-5p	0	0.920507	0	0	0	-37.6447	-5.23438	0.161073	#N/A
hsa-miR-548av-5p	0	0	0	0	0	#N/A	#N/A	#N/A	#N/A
hsa-miR-548ah-5p	0	0	0	0	0	#N/A	#N/A	#N/A	#N/A
hsa-miR-106a-5p	0.0881664	0.0484477	0	0	0	-5.01243	-2.32551	0.432511	#N/A
hsa-miR-548at-5p	0	0	0.549418	0	0	-23.2582	-4.53967	0.215068	#N/A
hsa-miR-3646	0	0	0	0	0	#N/A	#N/A	#N/A	#N/A
hsa-miR-522-3p	0	0	0	0	0	#N/A	#N/A	#N/A	#N/A
hsa-miR-3606-3p	0	0	0	0	0	#N/A	#N/A	#N/A	#N/A
hsa-miR-122b-3p	0	0	0	0	0	#N/A	#N/A	#N/A	#N/A
hsa-miR-649	0	0	0	0	0	#N/A	#N/A	#N/A	#N/A
hsa-miR-5583-5p	0	0	0	0	0	#N/A	#N/A	#N/A	#N/A
hsa-miR-3129-3p	0	0	0	0	0	#N/A	#N/A	#N/A	#N/A
hsa-miR-606	0	0	0	0	0	#N/A	#N/A	#N/A	#N/A
hsa-miR-618	0	0	0	0	0	#N/A	#N/A	#N/A	#N/A
hsa-miR-3617-5p	0	0	0	0	0	#N/A	#N/A	#N/A	#N/A
hsa-miR-3667-5p	0	0	0	0	0	#N/A	#N/A	#N/A	#N/A
hsa-miR-548ao-3p	0	0	0	0	0	#N/A	#N/A	#N/A	#N/A
hsa-miR-4432	0	0	0	0	0	#N/A	#N/A	#N/A	#N/A
hsa-miR-4662a-3p	0	0	0	0	0	#N/A	#N/A	#N/A	#N/A
hsa-miR-3156-5p	0	0	0	0	0	#N/A	#N/A	#N/A	#N/A
hsa-miR-4662b	0	0	0	0	0	#N/A	#N/A	#N/A	#N/A
hsa-miR-498-3p	0	0	0	0	0	#N/A	#N/A	#N/A	#N/A
hsa-miR-518e-3p	0	0	0	0	0	#N/A	#N/A	#N/A	#N/A
hsa-miR-320e	0.0881664	0.145343	0.0422629	0.124937	0	-1.40627	-0.491872	0.812415	#N/A
hsa-miR-651-3p	0	0	0	0	0	#N/A	#N/A	#N/A	#N/A
hsa-miR-3173-3p	0	0	0	0	0	#N/A	#N/A	#N/A	#N/A
hsa-miR-541-5p	0	0	0	0	0	#N/A	#N/A	#N/A	#N/A
hsa-miR-3910	0	0	0	0	0	#N/A	#N/A	#N/A	#N/A
hsa-miR-548ba	0	0	0	0	0	#N/A	#N/A	#N/A	#N/A
hsa-miR-570-5p	0	0	0	0	0	#N/A	#N/A	#N/A	#N/A
hsa-miR-548ag	0.0881664	0	0	0	0	-2.87431	-1.52322	0.611005	#N/A
hsa-miR-3974	0	0	0	0	0	#N/A	#N/A	#N/A	#N/A
hsa-miR-4735-3p	0	0	0	0	0	#N/A	#N/A	#N/A	#N/A
hsa-miR-562	0	0	0	0	0	#N/A	#N/A	#N/A	#N/A
hsa-miR-3184-3p	0	0	0	0	0	#N/A	#N/A	#N/A	#N/A
hsa-miR-519b-3p	0	0	0	0	0	#N/A	#N/A	#N/A	#N/A
hsa-miR-519a-3p	0	0	0	0	0	#N/A	#N/A	#N/A	#N/A
hsa-miR-519c-3p	0	0	0	0	0	#N/A	#N/A	#N/A	#N/A
hsa-miR-372-3p	0	0	0	0	0	#N/A	#N/A	#N/A	#N/A
hsa-miR-520a-3p	0	0	0	0	0	#N/A	#N/A	#N/A	#N/A
hsa-miR-520b-3p	0	0	0	0	0	#N/A	#N/A	#N/A	#N/A
hsa-miR-520c-3p	0	0	0	0	0	#N/A	#N/A	#N/A	#N/A
hsa-miR-520e-3p	0	0	0	0	0	#N/A	#N/A	#N/A	#N/A
hsa-miR-520d-3p	0	0	0	0	0	#N/A	#N/A	#N/A	#N/A
hsa-miR-148a-5p	0	0	0	0	0	#N/A	#N/A	#N/A	#N/A
hsa-miR-1277-5p	0	0	0	0	0	#N/A	#N/A	#N/A	#N/A
hsa-miR-4517	0	0	0	0	0	#N/A	#N/A	#N/A	#N/A
hsa-miR-4506	0	0	0	0	0	#N/A	#N/A	#N/A	#N/A
hsa-miR-513b-3p	0	0	0	0	0	#N/A	#N/A	#N/A	#N/A
hsa-miR-944	0	0	0	0	0	#N/A	#N/A	#N/A	#N/A
hsa-miR-4760-3p	0	0	0	0	0	#N/A	#N/A	#N/A	#N/A
hsa-miR-3529-3p	0	0	0	0	0	#N/A	#N/A	#N/A	#N/A
hsa-miR-362-3p	0	0	0.676206	0	0	-28.2505	-4.8202	0.194705	#N/A
hsa-miR-6757-3p	0	0	0.0845258	0	0	-5.01105	-2.32511	0.422646	#N/A
hsa-miR-552-3p	0	0	0	0	0	#N/A	#N/A	#N/A	#N/A
hsa-miR-499a-3p	0	0	0	0	0	#N/A	#N/A	#N/A	#N/A
hsa-miR-499b-3p	0	0	0	0	0	#N/A	#N/A	#N/A	#N/A
hsa-miR-1255b-2-3p	0	0	0	0	0	#N/A	#N/A	#N/A	#N/A
hsa-miR-634	0	0	0	0	0	#N/A	#N/A	#N/A	#N/A
hsa-miR-4482-5p	0	0	0	0	0	#N/A	#N/A	#N/A	#N/A
hsa-miR-5195-5p	0	0	0	0	0	#N/A	#N/A	#N/A	#N/A
hsa-miR-6813-3p	0	0	0	0	0	#N/A	#N/A	#N/A	#N/A
hsa-miR-521	0	0	0	0	0	#N/A	#N/A	#N/A	#N/A
hsa-miR-548al	0	0	0.507155	0	0	-21.5967	-4.43274	0.223775	#N/A
hsa-miR-4681	0	0	0	0	0	#N/A	#N/A	#N/A	#N/A
hsa-miR-4661-5p	0	0	0	0	0	#N/A	#N/A	#N/A	#N/A
hsa-miR-3923	0	0	0	0	0	#N/A	#N/A	#N/A	#N/A
hsa-miR-4798-3p	0	0	0	0	0	#N/A	#N/A	#N/A	#N/A
hsa-miR-3145-5p	0	0	0	0	0	#N/A	#N/A	#N/A	#N/A
hsa-miR-4636	0	0	0	0	0	#N/A	#N/A	#N/A	#N/A
hsa-miR-5684	0	0	0	0	0	#N/A	#N/A	#N/A	#N/A
hsa-miR-4714-5p	0	0	0	0	0	#N/A	#N/A	#N/A	#N/A
hsa-miR-3664-5p	0	0	0	0	0	#N/A	#N/A	#N/A	#N/A
hsa-miR-4724-5p	0	0	0	0	0	#N/A	#N/A	#N/A	#N/A
hsa-miR-1243	0	0.775164	0	0	0	-31.8931	-4.99517	0.184018	#N/A
hsa-miR-5197-3p	0	0	0	0	0	#N/A	#N/A	#N/A	#N/A
hsa-miR-483-5p	0	0	0	0	0.0575182	6.19848	2.63191	0.342144	#N/A
hsa-miR-4499	0	0	0	0	0	#N/A	#N/A	#N/A	#N/A
hsa-miR-3925-5p	0	0	0	0	0	#N/A	#N/A	#N/A	#N/A
hsa-miR-6856-5p	0	0	0	0	0	#N/A	#N/A	#N/A	#N/A
hsa-miR-3916	0	0	0	0	0	#N/A	#N/A	#N/A	#N/A
hsa-miR-3942-5p	0	0	0	0	0	#N/A	#N/A	#N/A	#N/A
hsa-miR-6838-5p	0	0	0	0	0	#N/A	#N/A	#N/A	#N/A
hsa-miR-646	0	0	0	0	0	#N/A	#N/A	#N/A	#N/A
hsa-miR-1179	0	0	0.718469	0	0	-29.9167	-4.90288	0.192585	#N/A
hsa-miR-6779-3p	0.705332	0.0484477	0	0	0	-28.9832	-4.85715	0.163887	#N/A
hsa-miR-129-1-3p	0	0.532925	0	0	0	-22.3167	-4.48005	0.215354	#N/A
hsa-miR-596	0	0	0	0	0	#N/A	#N/A	#N/A	#N/A
hsa-miR-4670-5p	0	0	0	0	0	#N/A	#N/A	#N/A	#N/A
hsa-miR-6854-5p	0	0	0	0	0	#N/A	#N/A	#N/A	#N/A
hsa-miR-208b-5p	0	0	0	0	0	#N/A	#N/A	#N/A	#N/A
hsa-miR-3914	0	0	0	0	0	#N/A	#N/A	#N/A	#N/A
hsa-miR-6888-5p	0	0	0	0	0	#N/A	#N/A	#N/A	#N/A
hsa-miR-708-5p	0	0	0	0	0.345109	29.6569	4.8903	0.111775	#N/A
hsa-miR-4747-3p	0	0	0	0	0	#N/A	#N/A	#N/A	#N/A
hsa-miR-3142	0	0	0	0	0	#N/A	#N/A	#N/A	#N/A
hsa-miR-9500	0	0	0	0	0	#N/A	#N/A	#N/A	#N/A
hsa-miR-7845-5p	0	0	0	0	0	#N/A	#N/A	#N/A	#N/A
hsa-miR-4739	0	0	0	0	0	#N/A	#N/A	#N/A	#N/A
hsa-miR-6743-5p	0	0	0	0	0	#N/A	#N/A	#N/A	#N/A
hsa-miR-6085	0	0	0	0	0	#N/A	#N/A	#N/A	#N/A
hsa-miR-4716-3p	0	0	0	0	0	#N/A	#N/A	#N/A	#N/A
hsa-miR-4678	0	0	0	0	0	#N/A	#N/A	#N/A	#N/A
hsa-miR-4464	0	0	0	0	0	#N/A	#N/A	#N/A	#N/A
hsa-miR-1244	0	0	0	0	0	#N/A	#N/A	#N/A	#N/A
hsa-miR-5588-3p	0	0	0	0	0	#N/A	#N/A	#N/A	#N/A
hsa-miR-6838-3p	0	0	0	0	0	#N/A	#N/A	#N/A	#N/A
hsa-miR-1245a	0	0	0	0	0	#N/A	#N/A	#N/A	#N/A
hsa-miR-371b-3p	0	0	0	0	0	#N/A	#N/A	#N/A	#N/A
hsa-miR-371a-3p	0	0	0	0	0	#N/A	#N/A	#N/A	#N/A
hsa-miR-519e-3p	0	0	0	0	0	#N/A	#N/A	#N/A	#N/A
hsa-miR-512-3p	0	0	0	0	0	#N/A	#N/A	#N/A	#N/A
hsa-miR-520f-3p	0	0	0	0	0	#N/A	#N/A	#N/A	#N/A
hsa-miR-648	0	0	0	0	0	#N/A	#N/A	#N/A	#N/A
hsa-miR-4715-5p	0	0	0	0	0	#N/A	#N/A	#N/A	#N/A
hsa-miR-5590-3p	0	0	0	0	0	#N/A	#N/A	#N/A	#N/A
hsa-miR-5692b	0	0	0	0	0	#N/A	#N/A	#N/A	#N/A
hsa-miR-5692c	0	0	0	0	0	#N/A	#N/A	#N/A	#N/A
hsa-miR-1295b-3p	0	0	0	0	0	#N/A	#N/A	#N/A	#N/A
hsa-miR-5094	0	0	0	0	0	#N/A	#N/A	#N/A	#N/A
hsa-miR-96-3p	0	0	0	0	0	#N/A	#N/A	#N/A	#N/A
hsa-miR-5092	0	0	0	0	0	#N/A	#N/A	#N/A	#N/A
hsa-miR-4733-5p	0	0	0	0	0	#N/A	#N/A	#N/A	#N/A
hsa-miR-500b-5p	0	0	0	0	0	#N/A	#N/A	#N/A	#N/A
hsa-miR-5188	0	0	0	0	0	#N/A	#N/A	#N/A	#N/A
hsa-miR-4712-3p	0	0	0	0	0	#N/A	#N/A	#N/A	#N/A
hsa-miR-4495	0	0	0	0	0	#N/A	#N/A	#N/A	#N/A
hsa-miR-3668	0	0	0	0	0	#N/A	#N/A	#N/A	#N/A
hsa-miR-4657	0	0	0	0	0	#N/A	#N/A	#N/A	#N/A
hsa-miR-4491	0	0	0	0	0	#N/A	#N/A	#N/A	#N/A
hsa-miR-511-3p	0	0	0	0	0	#N/A	#N/A	#N/A	#N/A
hsa-miR-4307	0	0	0	0	0	#N/A	#N/A	#N/A	#N/A
hsa-miR-10399-5p	0	0	0	0	0	#N/A	#N/A	#N/A	#N/A
hsa-miR-3938	0	0	0	0	0	#N/A	#N/A	#N/A	#N/A
hsa-miR-4778-5p	0	0	0	0	0	#N/A	#N/A	#N/A	#N/A
hsa-miR-363-3p	0	0	0.338103	0	0	-14.9722	-3.90422	0.253891	#N/A
hsa-miR-367-3p	0	0	0	0	0	#N/A	#N/A	#N/A	#N/A
hsa-miR-4699-3p	0	0	0	0	0	#N/A	#N/A	#N/A	#N/A
hsa-miR-3613-3p	0	0	0	0	0	#N/A	#N/A	#N/A	#N/A
hsa-miR-3973	0	0	0	0	0	#N/A	#N/A	#N/A	#N/A
hsa-miR-520h	0	0	0	0	0	#N/A	#N/A	#N/A	#N/A
hsa-miR-520g-3p	0	0	0	0	0	#N/A	#N/A	#N/A	#N/A
hsa-miR-4709-5p	0	0	0	0	0	#N/A	#N/A	#N/A	#N/A
hsa-miR-4761-5p	0	0	0	0	0	#N/A	#N/A	#N/A	#N/A
hsa-miR-216b-3p	0	1.0174	0	0	0	-41.4809	-5.37437	0.153197	#N/A
hsa-miR-3681-3p	0	0	0	0	0	#N/A	#N/A	#N/A	#N/A
hsa-miR-4717-3p	0	0	0	0	0	#N/A	#N/A	#N/A	#N/A
hsa-miR-6865-3p	0	0	0	0	0	#N/A	#N/A	#N/A	#N/A
hsa-miR-6760-3p	0	0	0	0	0	#N/A	#N/A	#N/A	#N/A
hsa-miR-6847-5p	0	0	0	0	0	#N/A	#N/A	#N/A	#N/A
hsa-miR-383-3p	0	0	0	0	0	#N/A	#N/A	#N/A	#N/A
hsa-miR-5685	0	0	0	0	0	#N/A	#N/A	#N/A	#N/A
hsa-miR-4433a-3p	0	0	0	0	0	#N/A	#N/A	#N/A	#N/A
hsa-miR-6715b-5p	0	0	0	0	0	#N/A	#N/A	#N/A	#N/A
hsa-miR-4514	0	0	0	0	0	#N/A	#N/A	#N/A	#N/A
hsa-miR-3937	0	0	0	0	0	#N/A	#N/A	#N/A	#N/A
hsa-miR-4441	0	0	0	0	0	#N/A	#N/A	#N/A	#N/A
hsa-miR-3918	0	0	0	0	0	#N/A	#N/A	#N/A	#N/A
hsa-miR-9900	0	0	0	0	0	#N/A	#N/A	#N/A	#N/A
hsa-miR-936	0	0	0	0	0	#N/A	#N/A	#N/A	#N/A
hsa-miR-622	0	0	0	0	0	#N/A	#N/A	#N/A	#N/A
hsa-miR-1-5p	0	0	0	0	0	#N/A	#N/A	#N/A	#N/A
hsa-miR-4793-5p	0	0	0	0	0	#N/A	#N/A	#N/A	#N/A
hsa-miR-6785-3p	0	0	0	0	0	#N/A	#N/A	#N/A	#N/A
hsa-miR-4317	0	0	0	0	0	#N/A	#N/A	#N/A	#N/A
hsa-miR-1250-3p	0	0	0	0	0	#N/A	#N/A	#N/A	#N/A
hsa-miR-3691-3p	0	0	0	0	0	#N/A	#N/A	#N/A	#N/A
hsa-miR-6849-3p	0	0	0	0	0	#N/A	#N/A	#N/A	#N/A
hsa-miR-4738-5p	0	0	0	0	0	#N/A	#N/A	#N/A	#N/A
hsa-miR-6837-5p	0	0	0	0	0	#N/A	#N/A	#N/A	#N/A
hsa-miR-4726-3p	0	0	0	0	0	#N/A	#N/A	#N/A	#N/A
hsa-miR-6840-5p	0	0	0	0	0	#N/A	#N/A	#N/A	#N/A
hsa-miR-6795-3p	0	0	0	0	0	#N/A	#N/A	#N/A	#N/A
hsa-miR-6801-3p	0	0	0	0	0	#N/A	#N/A	#N/A	#N/A
hsa-miR-7108-3p	0	0	0	0	0	#N/A	#N/A	#N/A	#N/A
hsa-miR-1247-5p	0	0	0	0	0	#N/A	#N/A	#N/A	#N/A
hsa-miR-4655-3p	0	0	0	0	0	#N/A	#N/A	#N/A	#N/A
hsa-miR-4780	0	0	0	0	0	#N/A	#N/A	#N/A	#N/A
hsa-miR-6832-3p	0	0.290686	0	0	0	-12.7573	-3.67325	0.273396	#N/A
hsa-miR-4671-5p	0	0	0	0	0	#N/A	#N/A	#N/A	#N/A
hsa-miR-1973	0	0	0	1.1869	0	97.7235	6.61063	0.0606676	#N/A
hsa-miR-660-3p	0	0	0	0	0	#N/A	#N/A	#N/A	#N/A
hsa-miR-3140-5p	0	0	0	0	0	#N/A	#N/A	#N/A	#N/A
hsa-miR-544b	0	0	0	0	0	#N/A	#N/A	#N/A	#N/A
hsa-miR-4722-3p	0	0	0	0	0	#N/A	#N/A	#N/A	#N/A
hsa-miR-3690	0	0	0	0	0	#N/A	#N/A	#N/A	#N/A
hsa-miR-8073	0	0	0	0	0	#N/A	#N/A	#N/A	#N/A
hsa-miR-6742-3p	0	0	0	0	0	#N/A	#N/A	#N/A	#N/A
hsa-miR-4421	0	0	0	0	0	#N/A	#N/A	#N/A	#N/A
hsa-miR-3667-3p	0	0	0	0	0	#N/A	#N/A	#N/A	#N/A
hsa-miR-1248	0	0	0	0	0	#N/A	#N/A	#N/A	#N/A
hsa-miR-6841-3p	0	0	0	0	0	#N/A	#N/A	#N/A	#N/A
hsa-miR-1915-5p	0	0	0	0	0	#N/A	#N/A	#N/A	#N/A
hsa-miR-5091	0	0	0	0	0	#N/A	#N/A	#N/A	#N/A
hsa-miR-105-3p	0	0	0	0	0	#N/A	#N/A	#N/A	#N/A
hsa-miR-6075	0	0	0	0	0	#N/A	#N/A	#N/A	#N/A
hsa-miR-7112-5p	0	0	0	0	0	#N/A	#N/A	#N/A	#N/A
hsa-miR-6777-5p	0	0	0	0	0	#N/A	#N/A	#N/A	#N/A
hsa-miR-1250-5p	0	0	0	0	0	#N/A	#N/A	#N/A	#N/A
hsa-miR-5707	0	0	0	0	0	#N/A	#N/A	#N/A	#N/A
hsa-miR-4509	0	0	0	0	0	#N/A	#N/A	#N/A	#N/A
hsa-miR-190b-3p	0	0	0	0	0	#N/A	#N/A	#N/A	#N/A
hsa-miR-616-5p	0	0	0	0	0	#N/A	#N/A	#N/A	#N/A
hsa-miR-371b-5p	0	0	0	0	0	#N/A	#N/A	#N/A	#N/A
hsa-miR-373-5p	0	0	0	0	0	#N/A	#N/A	#N/A	#N/A
hsa-miR-371a-5p	0	0	0	0	0	#N/A	#N/A	#N/A	#N/A
hsa-miR-4264	0	0	0	0	0	#N/A	#N/A	#N/A	#N/A
hsa-miR-6758-3p	0	0	0	0	0	#N/A	#N/A	#N/A	#N/A
hsa-miR-5695	0	0	0	0	0	#N/A	#N/A	#N/A	#N/A
hsa-miR-3925-3p	0	0	0	0	0	#N/A	#N/A	#N/A	#N/A
hsa-miR-6814-3p	0	0	0	0	0	#N/A	#N/A	#N/A	#N/A
hsa-miR-4638-5p	0	0	0	0	0	#N/A	#N/A	#N/A	#N/A
hsa-miR-1251-5p	0	0	0	0	0	#N/A	#N/A	#N/A	#N/A
hsa-miR-5187-3p	0	0	0	0	0	#N/A	#N/A	#N/A	#N/A
hsa-miR-3660	0	0	0	0	0	#N/A	#N/A	#N/A	#N/A
hsa-miR-6751-3p	0	0	0.549418	0	0	-23.2582	-4.53967	0.214995	#N/A
hsa-miR-3920	0	0	0	0	0	#N/A	#N/A	#N/A	#N/A
hsa-miR-6128	0	0	0	0	0	#N/A	#N/A	#N/A	#N/A
hsa-miR-378b	0	0	0	0.0624685	0.172555	20.7177	4.37279	0.128612	#N/A
hsa-miR-378e	0	0	0	0	0	#N/A	#N/A	#N/A	#N/A
hsa-miR-378j	0	0	0	0	0	#N/A	#N/A	#N/A	#N/A
hsa-miR-6868-5p	0	0	0	0	0	#N/A	#N/A	#N/A	#N/A
hsa-miR-4799-3p	0	0	0	0	0	#N/A	#N/A	#N/A	#N/A
hsa-miR-5588-5p	0	0	0	0	0	#N/A	#N/A	#N/A	#N/A
hsa-miR-4646-5p	0	0	0	0	0	#N/A	#N/A	#N/A	#N/A
hsa-miR-6506-5p	0	0	0	0	0	#N/A	#N/A	#N/A	#N/A
hsa-miR-6860	0	0	0	0	0	#N/A	#N/A	#N/A	#N/A
hsa-miR-4667-5p	0	0	0	0	0	#N/A	#N/A	#N/A	#N/A
hsa-miR-637	0	0	0	0	0	#N/A	#N/A	#N/A	#N/A
hsa-miR-6861-5p	0	0	0.718469	0	0	-29.9167	-4.90288	0.192807	#N/A
hsa-miR-20b-3p	0	0	0	0	0	#N/A	#N/A	#N/A	#N/A
hsa-miR-6773-3p	0	0	0	0	0	#N/A	#N/A	#N/A	#N/A
hsa-miR-367-5p	0	0	0	0	0	#N/A	#N/A	#N/A	#N/A
hsa-miR-302a-5p	0	0	0	0	0	#N/A	#N/A	#N/A	#N/A
hsa-miR-600	0	0	0	0	0	#N/A	#N/A	#N/A	#N/A
hsa-miR-412-3p	0	0	0	0	0	#N/A	#N/A	#N/A	#N/A
hsa-miR-635	0	0	0	0	0	#N/A	#N/A	#N/A	#N/A
hsa-miR-6774-5p	0	0	0	0	0	#N/A	#N/A	#N/A	#N/A
hsa-miR-643	0	0	0	0	0	#N/A	#N/A	#N/A	#N/A
hsa-miR-302b-5p	0	0	0	0	0	#N/A	#N/A	#N/A	#N/A
hsa-miR-302d-5p	0	0	0	0	0	#N/A	#N/A	#N/A	#N/A
hsa-miR-3124-3p	0	0	0	0	0	#N/A	#N/A	#N/A	#N/A
hsa-miR-5681a	0	0	0	0	0	#N/A	#N/A	#N/A	#N/A
hsa-miR-6730-5p	0	0	0	0	0	#N/A	#N/A	#N/A	#N/A
hsa-miR-4680-5p	0	0	0	0	0	#N/A	#N/A	#N/A	#N/A
hsa-miR-3185	0	0	0	0	0	#N/A	#N/A	#N/A	#N/A
hsa-miR-10522-5p	0	0	0	0	0	#N/A	#N/A	#N/A	#N/A
hsa-miR-4699-5p	0	0	0	0	0	#N/A	#N/A	#N/A	#N/A
hsa-miR-1252-5p	0	0	0	0	0	#N/A	#N/A	#N/A	#N/A
hsa-miR-605-3p	0	0	0.169052	0	0	-8.41477	-3.07292	0.333511	#N/A
hsa-miR-4493	0	0	0	0	0	#N/A	#N/A	#N/A	#N/A
hsa-miR-7515	0	0	0	0	0	#N/A	#N/A	#N/A	#N/A
hsa-miR-3179	0	0	0.633943	0	0	-26.5852	-4.73255	0.200778	#N/A
hsa-miR-548ao-5p	0	0	0	0	0	#N/A	#N/A	#N/A	#N/A
hsa-miR-548ax	0	0	0	0	0	#N/A	#N/A	#N/A	#N/A
hsa-miR-4795-5p	0	0	0	0	0	#N/A	#N/A	#N/A	#N/A
hsa-miR-10393-5p	0	0	0	0	0	#N/A	#N/A	#N/A	#N/A
hsa-miR-219b-3p	0	0	0	0	0	#N/A	#N/A	#N/A	#N/A
hsa-miR-219a-2-3p	0	0	0	0	0	#N/A	#N/A	#N/A	#N/A
hsa-miR-642a-3p	0	0	0	0	0	#N/A	#N/A	#N/A	#N/A
hsa-miR-642b-3p	0	0	0	0	0	#N/A	#N/A	#N/A	#N/A
hsa-miR-3117-5p	0	0	0	0	0	#N/A	#N/A	#N/A	#N/A
hsa-miR-3913-3p	0	0	0	0	0	#N/A	#N/A	#N/A	#N/A
hsa-miR-591	0	0	0	0	0	#N/A	#N/A	#N/A	#N/A
hsa-miR-4725-5p	0	0.145343	0	0	0	-6.99752	-2.80684	0.359706	#N/A
hsa-miR-504-5p	0	0	0	0	0	#N/A	#N/A	#N/A	#N/A
hsa-miR-631	0	0	0	0	0	#N/A	#N/A	#N/A	#N/A
hsa-miR-6855-3p	0	0	0	0	0	#N/A	#N/A	#N/A	#N/A
hsa-miR-4513	0	0	0	0	0	#N/A	#N/A	#N/A	#N/A
hsa-miR-617	0	0	0	0	0	#N/A	#N/A	#N/A	#N/A
hsa-miR-1253	0	0	0	0	0	#N/A	#N/A	#N/A	#N/A
hsa-miR-6088	0	0	0	0	0	#N/A	#N/A	#N/A	#N/A
hsa-miR-4708-5p	0	0	0	0	0	#N/A	#N/A	#N/A	#N/A
hsa-miR-5186	0	0	0	0	0	#N/A	#N/A	#N/A	#N/A
hsa-miR-4468	0	0	0	0	0	#N/A	#N/A	#N/A	#N/A
hsa-miR-3670	0	0	0	0	0	#N/A	#N/A	#N/A	#N/A
hsa-miR-3160-3p	0	0	0	0	0	#N/A	#N/A	#N/A	#N/A
hsa-miR-4487	0	0	0	0	0	#N/A	#N/A	#N/A	#N/A
hsa-miR-4751	0	0	0	0	0	#N/A	#N/A	#N/A	#N/A
hsa-miR-6884-5p	0	0	0	0	0	#N/A	#N/A	#N/A	#N/A
hsa-miR-3188	0	0.872059	0	0	0	-35.7271	-5.15895	0.169724	#N/A
hsa-miR-4458	0	0	0	0	0	#N/A	#N/A	#N/A	#N/A
hsa-miR-202-3p	0	0	0	0	0	#N/A	#N/A	#N/A	#N/A
hsa-miR-924	0	0	0	0	0	#N/A	#N/A	#N/A	#N/A
hsa-miR-4424	0	0	0	0	0	#N/A	#N/A	#N/A	#N/A
hsa-miR-3145-3p	0	0	0	0	0	#N/A	#N/A	#N/A	#N/A
hsa-miR-383-5p	0	0	0	0	0	#N/A	#N/A	#N/A	#N/A
hsa-miR-3171	0	0	0	0	0	#N/A	#N/A	#N/A	#N/A
hsa-miR-4445-5p	0	0	0	0	0	#N/A	#N/A	#N/A	#N/A
hsa-miR-1468-3p	0	0	0	0	0	#N/A	#N/A	#N/A	#N/A
hsa-miR-4708-3p	0	0	0	0	0	#N/A	#N/A	#N/A	#N/A
hsa-miR-8064	0	0	0	0	0	#N/A	#N/A	#N/A	#N/A
hsa-miR-298	0	0	0	0	0	#N/A	#N/A	#N/A	#N/A
hsa-miR-4771	0	0	0	0	0	#N/A	#N/A	#N/A	#N/A
hsa-miR-2467-3p	0	0	0	0	0	#N/A	#N/A	#N/A	#N/A
hsa-miR-6132	0	0	0	0	0	#N/A	#N/A	#N/A	#N/A
hsa-miR-3665	0	0	0	0	0	#N/A	#N/A	#N/A	#N/A
hsa-miR-6499-3p	0	0	0	0	0	#N/A	#N/A	#N/A	#N/A
hsa-miR-5689	0	0	0	0	0	#N/A	#N/A	#N/A	#N/A
hsa-miR-6076	0	0	0	0	0	#N/A	#N/A	#N/A	#N/A
hsa-miR-4480	0	0	0	0	0	#N/A	#N/A	#N/A	#N/A
hsa-miR-4755-3p	0	0	0	0	0	#N/A	#N/A	#N/A	#N/A
hsa-miR-4313	0	0	0	0	0	#N/A	#N/A	#N/A	#N/A
hsa-miR-4707-3p	0	0	0	0	0	#N/A	#N/A	#N/A	#N/A
hsa-miR-3648	0	0	0	0	0	#N/A	#N/A	#N/A	#N/A
hsa-miR-6811-3p	0	0	0	0	0	#N/A	#N/A	#N/A	#N/A
hsa-miR-5581-5p	0	0	0	0	0	#N/A	#N/A	#N/A	#N/A
hsa-miR-4706	0	0	0	0	0	#N/A	#N/A	#N/A	#N/A
hsa-miR-4746-3p	0	0	0	0	0	#N/A	#N/A	#N/A	#N/A
hsa-miR-6853-5p	0	0	0	0	0	#N/A	#N/A	#N/A	#N/A
hsa-miR-548v	0	0	0	0	0	#N/A	#N/A	#N/A	#N/A
hsa-miR-549a-5p	0	0	0	0	0	#N/A	#N/A	#N/A	#N/A
hsa-miR-7106-3p	0	0	0	0	0	#N/A	#N/A	#N/A	#N/A
hsa-miR-6502-5p	0	0	0	0	0	#N/A	#N/A	#N/A	#N/A
hsa-miR-4663	0	0	0	0	0	#N/A	#N/A	#N/A	#N/A
hsa-miR-133a-5p	0	0	0	0	0	#N/A	#N/A	#N/A	#N/A
hsa-miR-1537-5p	0	0	0.422629	0	0	-18.2795	-4.19215	0.232849	#N/A
hsa-miR-4718	0	0	0	0	0	#N/A	#N/A	#N/A	#N/A
hsa-miR-626	0	0	0	0	0	#N/A	#N/A	#N/A	#N/A
hsa-miR-6876-3p	0	0	0	0	0	#N/A	#N/A	#N/A	#N/A
hsa-miR-2115-5p	0	0	0	0	0	#N/A	#N/A	#N/A	#N/A
hsa-miR-3140-3p	0	0	0	0	0	#N/A	#N/A	#N/A	#N/A
hsa-miR-4261	0	0	0	0	0	#N/A	#N/A	#N/A	#N/A
hsa-miR-5093	0	0	0	0	0	#N/A	#N/A	#N/A	#N/A
hsa-miR-6828-5p	0	0	0	0	0	#N/A	#N/A	#N/A	#N/A
hsa-miR-613	0	0	0	0	0	#N/A	#N/A	#N/A	#N/A
hsa-miR-492	0	0	0	0	0	#N/A	#N/A	#N/A	#N/A
hsa-miR-659-5p	0	0	0.887521	0	0	-36.5891	-5.19334	0.166825	#N/A
hsa-miR-4740-5p	0	0	0	0	0	#N/A	#N/A	#N/A	#N/A
hsa-miR-4515	0	0	0	0	0	#N/A	#N/A	#N/A	#N/A
hsa-miR-4434	0	0	0	0	0	#N/A	#N/A	#N/A	#N/A
hsa-miR-5703	0	0	0	0	0	#N/A	#N/A	#N/A	#N/A
hsa-miR-5192	0	0	0	0	0	#N/A	#N/A	#N/A	#N/A
hsa-miR-6081	0	0	0	0	0	#N/A	#N/A	#N/A	#N/A
hsa-miR-4633-3p	0	0	0	0	0	#N/A	#N/A	#N/A	#N/A
hsa-miR-6500-5p	0	0	0	0	0	#N/A	#N/A	#N/A	#N/A
hsa-miR-7154-3p	0	0	0	0	0	#N/A	#N/A	#N/A	#N/A
hsa-miR-11181-3p	0	0	0	0	0	#N/A	#N/A	#N/A	#N/A
hsa-miR-6894-5p	0	0	0	0	0	#N/A	#N/A	#N/A	#N/A
hsa-miR-650	0	0	0	0	0	#N/A	#N/A	#N/A	#N/A
hsa-miR-3612	0	0	0	0	0	#N/A	#N/A	#N/A	#N/A
hsa-miR-6797-5p	0	0	0	0	0	#N/A	#N/A	#N/A	#N/A
hsa-miR-1249-5p	0	0	0	0	0	#N/A	#N/A	#N/A	#N/A
hsa-miR-6851-5p	0	0	0	0	0	#N/A	#N/A	#N/A	#N/A
hsa-miR-5191	0	0	0	0	0	#N/A	#N/A	#N/A	#N/A
hsa-miR-3167	0	0	0	0	0	#N/A	#N/A	#N/A	#N/A
hsa-miR-593-5p	0	0	0	0	0	#N/A	#N/A	#N/A	#N/A
hsa-miR-564	0	0	0	0	0	#N/A	#N/A	#N/A	#N/A
hsa-miR-885-3p	0	0	0	0	0	#N/A	#N/A	#N/A	#N/A
hsa-miR-4763-3p	0	0	0	0	0	#N/A	#N/A	#N/A	#N/A
hsa-miR-4736	0	0	0	0	0	#N/A	#N/A	#N/A	#N/A
hsa-miR-449b-5p	0	0.0484477	0.0845258	0	0	-7.14853	-2.83765	0.331363	#N/A
hsa-miR-3622b-5p	0	0	0	0	0	#N/A	#N/A	#N/A	#N/A
hsa-miR-4529-5p	0	0	0	0	0	#N/A	#N/A	#N/A	#N/A
hsa-miR-6775-3p	0	0	0	0	0	#N/A	#N/A	#N/A	#N/A
hsa-miR-4757-5p	0	0	0	0	0	#N/A	#N/A	#N/A	#N/A
hsa-miR-6735-3p	0	0	0	0	0	#N/A	#N/A	#N/A	#N/A
hsa-miR-6717-5p	0	0	0	0	0	#N/A	#N/A	#N/A	#N/A
hsa-miR-6722-5p	0	0	0	0	0	#N/A	#N/A	#N/A	#N/A
hsa-miR-663a	0	0	0	0	0	#N/A	#N/A	#N/A	#N/A
hsa-miR-6822-3p	0	0	0	0	0	#N/A	#N/A	#N/A	#N/A
hsa-miR-604	0	0	0	0	0	#N/A	#N/A	#N/A	#N/A
hsa-miR-4430	0	0	0	0	0	#N/A	#N/A	#N/A	#N/A
hsa-miR-4505	0	0	0	0	0	#N/A	#N/A	#N/A	#N/A
hsa-miR-7974	0	0	0	0	0	#N/A	#N/A	#N/A	#N/A
hsa-miR-4668-5p	0	0	0	0	0	#N/A	#N/A	#N/A	#N/A
hsa-miR-4747-5p	0	0	0	0	0	#N/A	#N/A	#N/A	#N/A
hsa-miR-5196-5p	0	0	0	0	0	#N/A	#N/A	#N/A	#N/A
hsa-miR-3649	0	0	0	0	0	#N/A	#N/A	#N/A	#N/A
hsa-miR-3199	0	0	0	0	0	#N/A	#N/A	#N/A	#N/A
hsa-miR-365a-5p	0	0	0	0	0	#N/A	#N/A	#N/A	#N/A
hsa-miR-6878-5p	0	0	0	0	0	#N/A	#N/A	#N/A	#N/A
hsa-miR-149-3p	0	0	0	0	0	#N/A	#N/A	#N/A	#N/A
hsa-miR-6883-5p	0	0	0	0	0	#N/A	#N/A	#N/A	#N/A
hsa-miR-638	0	0	0	0	0	#N/A	#N/A	#N/A	#N/A
hsa-miR-3945	0	0	0	0	0	#N/A	#N/A	#N/A	#N/A
hsa-miR-4253	0	0	0	0	0	#N/A	#N/A	#N/A	#N/A
hsa-miR-4726-5p	0	0	0	0	0	#N/A	#N/A	#N/A	#N/A
hsa-miR-296-5p	0.0881664	0.0484477	0	0	0.0575182	-1.09868	-0.135774	0.945719	#N/A
hsa-miR-6877-5p	0	0	0	0	0	#N/A	#N/A	#N/A	#N/A
hsa-miR-3144-5p	0	0	0	0	0	#N/A	#N/A	#N/A	#N/A
hsa-miR-4652-5p	0	0	0	0	0	#N/A	#N/A	#N/A	#N/A
hsa-miR-5010-5p	0	0	0	0	0	#N/A	#N/A	#N/A	#N/A
hsa-miR-4697-5p	0	0	0	0	0	#N/A	#N/A	#N/A	#N/A
hsa-miR-6885-5p	0	0	0	0	0	#N/A	#N/A	#N/A	#N/A
hsa-miR-6835-5p	0	0	0	0	0	#N/A	#N/A	#N/A	#N/A
hsa-miR-608	0	0	0	0	0	#N/A	#N/A	#N/A	#N/A
hsa-miR-6747-5p	0	0	0	0	0	#N/A	#N/A	#N/A	#N/A
hsa-miR-555	0	0	0	0	0	#N/A	#N/A	#N/A	#N/A
hsa-miR-6756-5p	0	0	0	0	0	#N/A	#N/A	#N/A	#N/A
hsa-miR-4455	0.0881664	0.0484477	0	0	0	-5.01243	-2.32551	0.432058	#N/A
hsa-miR-609	0	0	0	0	0	#N/A	#N/A	#N/A	#N/A
hsa-miR-4650-3p	0	0	0	0	0	#N/A	#N/A	#N/A	#N/A
hsa-miR-3529-5p	0	0	0	0	0	#N/A	#N/A	#N/A	#N/A
hsa-miR-5681b	0	0	0	0	0	#N/A	#N/A	#N/A	#N/A
hsa-miR-6503-5p	0	0	0	0	0	#N/A	#N/A	#N/A	#N/A
hsa-miR-3907	0	0	0	0	0	#N/A	#N/A	#N/A	#N/A
hsa-miR-3165	0	0	0	0	0	#N/A	#N/A	#N/A	#N/A
hsa-miR-6769a-5p	0	0	0	0	0	#N/A	#N/A	#N/A	#N/A
hsa-miR-3650	0	0	0	0	0	#N/A	#N/A	#N/A	#N/A
hsa-miR-4694-5p	0	0	0	0	0	#N/A	#N/A	#N/A	#N/A
hsa-miR-152-5p	0	0	0	0	0	#N/A	#N/A	#N/A	#N/A
hsa-miR-563	0	0	0	0	0	#N/A	#N/A	#N/A	#N/A
hsa-miR-6832-5p	0	0	0	0	0	#N/A	#N/A	#N/A	#N/A
hsa-miR-567	0	0	0	0	0	#N/A	#N/A	#N/A	#N/A
hsa-miR-630	0	0	0	0	0	#N/A	#N/A	#N/A	#N/A
hsa-miR-1257	0	0	0	0	0	#N/A	#N/A	#N/A	#N/A
hsa-miR-550a-3-5p	0	0	0	0	0	#N/A	#N/A	#N/A	#N/A
hsa-miR-4800-5p	0	0	0	0	0	#N/A	#N/A	#N/A	#N/A
hsa-miR-3688-5p	0	0.532925	0	0	0	-22.3167	-4.48005	0.215726	#N/A
hsa-miR-891a-3p	0	0	0	0	0	#N/A	#N/A	#N/A	#N/A
hsa-miR-6778-5p	0	0	0	0	0	#N/A	#N/A	#N/A	#N/A
hsa-miR-1233-5p	0	0	0	0	0	#N/A	#N/A	#N/A	#N/A
hsa-miR-6742-5p	0	0	0	0	0	#N/A	#N/A	#N/A	#N/A
hsa-miR-203a-5p	0	0	0	0	0	#N/A	#N/A	#N/A	#N/A
hsa-miR-644a	0	0	0	0	0	#N/A	#N/A	#N/A	#N/A
hsa-miR-569	0	0	0	0	0	#N/A	#N/A	#N/A	#N/A
hsa-miR-1258	0	0	0	0	0	#N/A	#N/A	#N/A	#N/A
hsa-miR-6501-5p	0	0	0	0	0	#N/A	#N/A	#N/A	#N/A
hsa-miR-6740-5p	0	0	0	0	0	#N/A	#N/A	#N/A	#N/A
hsa-miR-19b-2-5p	0	0	0	0	0	#N/A	#N/A	#N/A	#N/A
hsa-miR-9-3p	0	0	0	0	0	#N/A	#N/A	#N/A	#N/A
hsa-miR-3143	0	0	0	0	0	#N/A	#N/A	#N/A	#N/A
hsa-miR-208b-3p	0	0	0	0	0	#N/A	#N/A	#N/A	#N/A
hsa-miR-208a-3p	0	0	0	0	0	#N/A	#N/A	#N/A	#N/A
hsa-miR-374c-5p	0	0	0	0	0	#N/A	#N/A	#N/A	#N/A
hsa-miR-466	0	0	0	0	0	#N/A	#N/A	#N/A	#N/A
hsa-miR-4666a-5p	0	0	0	0	0	#N/A	#N/A	#N/A	#N/A
hsa-miR-5591-3p	0	0	0	0	0	#N/A	#N/A	#N/A	#N/A
hsa-miR-4777-3p	0	0	0	0	0	#N/A	#N/A	#N/A	#N/A
hsa-miR-4693-5p	0	0	0	0	0	#N/A	#N/A	#N/A	#N/A
hsa-miR-4766-3p	0	0	0	0	0	#N/A	#N/A	#N/A	#N/A
hsa-miR-4524b-5p	0	0	0	0	0	#N/A	#N/A	#N/A	#N/A
hsa-miR-4423-3p	0	0	0	0	0	#N/A	#N/A	#N/A	#N/A
hsa-miR-4727-3p	0	0	0	0	0	#N/A	#N/A	#N/A	#N/A
hsa-miR-4460	0	0	0	0	0	#N/A	#N/A	#N/A	#N/A
hsa-miR-3144-3p	0	0	0	0	0	#N/A	#N/A	#N/A	#N/A
hsa-miR-4633-5p	0	0	0	0	0	#N/A	#N/A	#N/A	#N/A
hsa-miR-3924	0	0	0	0	0	#N/A	#N/A	#N/A	#N/A
hsa-miR-556-3p	0	0	0.422629	0	0	-18.2795	-4.19215	0.23361	#N/A
hsa-miR-4795-3p	0	0	0	0	0	#N/A	#N/A	#N/A	#N/A
hsa-miR-3671	0	0	0	0	0	#N/A	#N/A	#N/A	#N/A
hsa-miR-561-5p	0	0.726716	0.0422629	0	0	-31.8919	-4.99512	0.176042	#N/A
hsa-miR-3127-5p	0	0	0	0	0	#N/A	#N/A	#N/A	#N/A
hsa-miR-5007-3p	0	0	0	0	0	#N/A	#N/A	#N/A	#N/A
hsa-miR-6516-3p	0	0.387582	0	0	0	-16.5793	-4.05131	0.240187	#N/A
hsa-miR-5195-3p	0	0	0	0	0	#N/A	#N/A	#N/A	#N/A
hsa-miR-2355-5p	0	0	0	0	0	#N/A	#N/A	#N/A	#N/A
hsa-miR-623	0	0	0	0	0	#N/A	#N/A	#N/A	#N/A
hsa-miR-7975	0	0	0	0	0	#N/A	#N/A	#N/A	#N/A
hsa-miR-7111-3p	0	0.145343	0.211314	0	0	-17.8324	-4.15643	0.212134	#N/A
hsa-miR-6881-3p	0	0	0	0	0	#N/A	#N/A	#N/A	#N/A
hsa-miR-639	0	0	0	0	0	#N/A	#N/A	#N/A	#N/A
hsa-miR-4790-5p	0	0	0	0	0	#N/A	#N/A	#N/A	#N/A
hsa-miR-3181	0	0	0	0	0	#N/A	#N/A	#N/A	#N/A
hsa-miR-517a-3p	0	0	0	0	0	#N/A	#N/A	#N/A	#N/A
hsa-miR-517c-3p	0	0	0	0	0	#N/A	#N/A	#N/A	#N/A
hsa-miR-4799-5p	0	0	0	0	0	#N/A	#N/A	#N/A	#N/A
hsa-miR-4256	0	0	0	0	0	#N/A	#N/A	#N/A	#N/A
hsa-miR-6828-3p	0	0	0	0	0	#N/A	#N/A	#N/A	#N/A
hsa-miR-516b-5p	0	0	0	0	0	#N/A	#N/A	#N/A	#N/A
hsa-miR-3686	0	0	0	0	0	#N/A	#N/A	#N/A	#N/A
hsa-miR-6888-3p	0	0	0.802995	0	0	-33.2516	-5.05535	0.179151	#N/A
hsa-miR-7843-3p	0	0	0	0	0	#N/A	#N/A	#N/A	#N/A
hsa-miR-3616-5p	0	0	0	0	0	#N/A	#N/A	#N/A	#N/A
hsa-miR-215-5p	0	0	0.0422629	0.562217	0	12.5573	3.65045	0.159583	#N/A
hsa-miR-3672	0	0	0	0	0	#N/A	#N/A	#N/A	#N/A
hsa-miR-5708	0	0	0	0	0	#N/A	#N/A	#N/A	#N/A
hsa-miR-640	0	0	0	0	0	#N/A	#N/A	#N/A	#N/A
hsa-miR-500a-3p	0	0	0	0	0.0575182	6.19848	2.63191	0.342144	#N/A
hsa-miR-6811-5p	0	0	0	0	0	#N/A	#N/A	#N/A	#N/A
hsa-miR-6836-3p	0	0.678268	0	0	0	-28.0608	-4.81048	0.192729	#N/A
hsa-miR-4737	0	0	0	0	0	#N/A	#N/A	#N/A	#N/A
hsa-miR-4754	0	0	0	0	0	#N/A	#N/A	#N/A	#N/A
hsa-miR-5089-3p	0	0	0	0	0	#N/A	#N/A	#N/A	#N/A
hsa-miR-4531	0	0	0	0	0	#N/A	#N/A	#N/A	#N/A
hsa-miR-620	0	0	0	0	0	#N/A	#N/A	#N/A	#N/A
hsa-miR-6874-5p	0	0	0	0	0	#N/A	#N/A	#N/A	#N/A
hsa-miR-4642	0	0	0	0	0	#N/A	#N/A	#N/A	#N/A
hsa-miR-6810-5p	0	0	0	0	0	#N/A	#N/A	#N/A	#N/A
hsa-miR-6812-5p	0	0	0	0	0	#N/A	#N/A	#N/A	#N/A
hsa-miR-4701-3p	0	0	0	0	0	#N/A	#N/A	#N/A	#N/A
hsa-miR-1263	0	0	0	0	0	#N/A	#N/A	#N/A	#N/A
hsa-miR-5587-5p	0	0	0	0	0	#N/A	#N/A	#N/A	#N/A
hsa-miR-6843-3p	0	0	0	0	0	#N/A	#N/A	#N/A	#N/A
hsa-miR-218-1-3p	0	0	0.549418	0	0	-23.2582	-4.53967	0.215337	#N/A
hsa-miR-135a-2-3p	0	0	0	0	0	#N/A	#N/A	#N/A	#N/A
hsa-miR-135b-3p	0	0	0	0	0	#N/A	#N/A	#N/A	#N/A
hsa-miR-568	0	0	0	0	0	#N/A	#N/A	#N/A	#N/A
hsa-miR-3912-5p	0	0	0	0	0	#N/A	#N/A	#N/A	#N/A
hsa-miR-4433b-5p	0	0	0.0422629	0	0	-2.87368	-1.5229	0.611087	#N/A
hsa-miR-8070	0	0	0	0	0	#N/A	#N/A	#N/A	#N/A
hsa-miR-550b-2-5p	0	0	0	0	0	#N/A	#N/A	#N/A	#N/A
hsa-miR-4296	0	0	0	0	0	#N/A	#N/A	#N/A	#N/A
hsa-miR-4477b	0	0	0	0	0	#N/A	#N/A	#N/A	#N/A
hsa-miR-6509-5p	0	0	0	0	0	#N/A	#N/A	#N/A	#N/A
hsa-miR-384	0	0	0	0	0	#N/A	#N/A	#N/A	#N/A
hsa-miR-4263	0	0	0	0	0	#N/A	#N/A	#N/A	#N/A
hsa-miR-4768-5p	0	0	0	0	0	#N/A	#N/A	#N/A	#N/A
hsa-miR-544a	0	0.339134	0.549418	0	0	-38.2013	-5.25555	0.148612	#N/A
hsa-miR-510-3p	0	0	0	0	0	#N/A	#N/A	#N/A	#N/A
hsa-miR-514b-3p	0	0	0	0	0	#N/A	#N/A	#N/A	#N/A
hsa-miR-514a-3p	0	0	0	0	0	#N/A	#N/A	#N/A	#N/A
hsa-miR-4774-3p	0	0	0	0	0	#N/A	#N/A	#N/A	#N/A
hsa-miR-4529-3p	0	0	0	0	0	#N/A	#N/A	#N/A	#N/A
hsa-miR-450a-2-3p	0	0	0	0	0	#N/A	#N/A	#N/A	#N/A
hsa-miR-3674	0	0	0	0	0	#N/A	#N/A	#N/A	#N/A
hsa-miR-4646-3p	0	0	0	0	0	#N/A	#N/A	#N/A	#N/A
hsa-miR-6739-3p	0	0	0	0	0	#N/A	#N/A	#N/A	#N/A
hsa-miR-4446-5p	0	0	0	0	0	#N/A	#N/A	#N/A	#N/A
hsa-miR-2113	0	0	0	0	0	#N/A	#N/A	#N/A	#N/A
hsa-miR-548d-3p	0	0	0	0	0	#N/A	#N/A	#N/A	#N/A
hsa-miR-548bb-3p	0	0	0	0	0	#N/A	#N/A	#N/A	#N/A
hsa-miR-548h-3p	0	0.629821	0	0	0	-26.1455	-4.70849	0.200718	#N/A
hsa-miR-548ac	0	0	0	0	0	#N/A	#N/A	#N/A	#N/A
hsa-miR-548ae-3p	0	0	0	0	0	#N/A	#N/A	#N/A	#N/A
hsa-miR-548ah-3p	0	0	0.887521	0	0	-36.5891	-5.19334	0.166873	#N/A
hsa-miR-548am-3p	0	0	0	0	0	#N/A	#N/A	#N/A	#N/A
hsa-miR-548j-3p	0	0	0	0	0	#N/A	#N/A	#N/A	#N/A
hsa-miR-548c-3p	0	0	0	0	0	#N/A	#N/A	#N/A	#N/A
hsa-miR-548at-3p	0	0	0.760732	0	0	-31.5838	-4.98111	0.188222	#N/A
hsa-miR-548ay-3p	0	0	0	0	0	#N/A	#N/A	#N/A	#N/A
hsa-miR-548a-3p	0	0	0	0	0	#N/A	#N/A	#N/A	#N/A
hsa-miR-548e-5p	0	0	0	0	0	#N/A	#N/A	#N/A	#N/A
hsa-miR-548t-5p	0	0	0	0	0	#N/A	#N/A	#N/A	#N/A
hsa-miR-548az-5p	0	0	0	0	0	#N/A	#N/A	#N/A	#N/A
hsa-miR-497-3p	0	0	0	0	0	#N/A	#N/A	#N/A	#N/A
hsa-miR-6771-3p	0	0	0	0	0	#N/A	#N/A	#N/A	#N/A
hsa-miR-548u	0	0	0	0	0	#N/A	#N/A	#N/A	#N/A
hsa-miR-583	0	0	0	0	0	#N/A	#N/A	#N/A	#N/A
hsa-miR-518b	0	0	0	0	0	#N/A	#N/A	#N/A	#N/A
hsa-miR-518d-3p	0	0	0	0	0	#N/A	#N/A	#N/A	#N/A
hsa-miR-518c-3p	0	0	0	0	0	#N/A	#N/A	#N/A	#N/A
hsa-miR-6768-3p	0	0	0	0	0	#N/A	#N/A	#N/A	#N/A
hsa-miR-548m	0	0	0	0	0	#N/A	#N/A	#N/A	#N/A
hsa-miR-6507-3p	0	0	0	0	0	#N/A	#N/A	#N/A	#N/A
hsa-miR-3609	0	0	0	0	0	#N/A	#N/A	#N/A	#N/A
hsa-miR-519d-3p	0	0	0	0	0	#N/A	#N/A	#N/A	#N/A
hsa-miR-20b-5p	0	0.0484477	0.169052	0.124937	0	-1.4058	-0.491396	0.820105	#N/A
hsa-miR-561-3p	0	0.484477	0	0	0	-20.4035	-4.35074	0.220656	#N/A
hsa-miR-5692a	0	0	0	0	0	#N/A	#N/A	#N/A	#N/A
hsa-miR-1252-3p	0	0	0	0	0	#N/A	#N/A	#N/A	#N/A
hsa-miR-4694-3p	0	0	0	0	0	#N/A	#N/A	#N/A	#N/A
hsa-miR-7-2-3p	0	0	0	0	0	#N/A	#N/A	#N/A	#N/A
hsa-miR-196a-1-3p	0	0	0	0	0	#N/A	#N/A	#N/A	#N/A
hsa-miR-6776-3p	0	0	0	0	0	#N/A	#N/A	#N/A	#N/A
hsa-miR-3150a-5p	0	0	0	0	0.115036	11.0381	3.46442	0.211248	#N/A
hsa-miR-3150b-5p	0	0	0	0	0	#N/A	#N/A	#N/A	#N/A
hsa-miR-490-3p	0	0	0	0	0	#N/A	#N/A	#N/A	#N/A
hsa-miR-708-3p	0	0	0	0	0	#N/A	#N/A	#N/A	#N/A
hsa-miR-548b-3p	0	0	0	0	0	#N/A	#N/A	#N/A	#N/A
hsa-miR-4428	0	0	0	0	0	#N/A	#N/A	#N/A	#N/A
hsa-miR-12118	0	0	0	0	0	#N/A	#N/A	#N/A	#N/A
hsa-miR-4753-5p	0	0	0	0	0	#N/A	#N/A	#N/A	#N/A
hsa-miR-4475	0	0	0	0	0	#N/A	#N/A	#N/A	#N/A
hsa-miR-1264	0	0	0	0	0	#N/A	#N/A	#N/A	#N/A
hsa-miR-5197-5p	0	0	0	0	0	#N/A	#N/A	#N/A	#N/A
hsa-miR-8066	0	0	0	0	0	#N/A	#N/A	#N/A	#N/A
hsa-miR-33a-3p	0	0	0	0	0	#N/A	#N/A	#N/A	#N/A
hsa-miR-5571-5p	0	0	0	0	0	#N/A	#N/A	#N/A	#N/A
hsa-miR-624-3p	0	0	0	0	0	#N/A	#N/A	#N/A	#N/A
hsa-miR-8485	0	0	0	0	0	#N/A	#N/A	#N/A	#N/A
hsa-miR-603	0	0.0484477	0	0	0	-2.87383	-1.52298	0.611067	#N/A
hsa-miR-6768-5p	0	0	0	0	0	#N/A	#N/A	#N/A	#N/A
hsa-miR-4789-3p	0	0	0	0	0	#N/A	#N/A	#N/A	#N/A
hsa-miR-3120-3p	0	0	0	0	0	#N/A	#N/A	#N/A	#N/A
hsa-miR-4700-3p	0	0	0	0	0	#N/A	#N/A	#N/A	#N/A
hsa-miR-4438	0	0	0	0	0	#N/A	#N/A	#N/A	#N/A
hsa-miR-5580-3p	0	0	0	0	0	#N/A	#N/A	#N/A	#N/A
hsa-miR-1911-3p	0	0	0	0	0	#N/A	#N/A	#N/A	#N/A
hsa-miR-6753-5p	0	0	0	0	0	#N/A	#N/A	#N/A	#N/A
hsa-miR-7153-3p	0	0	0	0	0	#N/A	#N/A	#N/A	#N/A
hsa-miR-1295b-5p	0	0	0	0	0	#N/A	#N/A	#N/A	#N/A
hsa-miR-4640-3p	0	0	0	0	0	#N/A	#N/A	#N/A	#N/A
hsa-miR-6510-3p	0	0	0.718469	0	0	-29.9167	-4.90288	0.193029	#N/A
hsa-miR-4655-5p	0	0	0	0	0	#N/A	#N/A	#N/A	#N/A
hsa-miR-6800-3p	0	0	0	0	0	#N/A	#N/A	#N/A	#N/A
hsa-miR-6782-3p	0	0	0	0	0	#N/A	#N/A	#N/A	#N/A
hsa-miR-4445-3p	0	0	0	0	0	#N/A	#N/A	#N/A	#N/A
hsa-miR-512-5p	0	0	0	0	0	#N/A	#N/A	#N/A	#N/A
hsa-miR-4418	0	0	0	0	0	#N/A	#N/A	#N/A	#N/A
hsa-miR-892b	0	0	0	0	0	#N/A	#N/A	#N/A	#N/A
hsa-miR-1183	0	0	0	0	0	#N/A	#N/A	#N/A	#N/A
hsa-miR-4318	0	0	0	0	0	#N/A	#N/A	#N/A	#N/A
hsa-miR-892a	0	0	0	0	0	#N/A	#N/A	#N/A	#N/A
hsa-miR-4676-3p	0	0	0	0	0	#N/A	#N/A	#N/A	#N/A
hsa-miR-892c-3p	0	0	0	0	0	#N/A	#N/A	#N/A	#N/A
hsa-miR-374c-3p	0	0	0	0	0	#N/A	#N/A	#N/A	#N/A
hsa-miR-4773	0	0	0	0	0	#N/A	#N/A	#N/A	#N/A
hsa-miR-3154	0	0	0	0	0	#N/A	#N/A	#N/A	#N/A
hsa-miR-3123	0	0	0	0	0	#N/A	#N/A	#N/A	#N/A
hsa-miR-6873-5p	0	0	0	0	0	#N/A	#N/A	#N/A	#N/A
hsa-miR-5586-3p	0	0	0	0	0	#N/A	#N/A	#N/A	#N/A
hsa-miR-5694	0	0	0	0	0	#N/A	#N/A	#N/A	#N/A
hsa-miR-6871-3p	0	0	0	0	0	#N/A	#N/A	#N/A	#N/A
hsa-miR-6165	0	0	0	0	0	#N/A	#N/A	#N/A	#N/A
hsa-miR-6510-5p	0	0	0	0	0	#N/A	#N/A	#N/A	#N/A
hsa-miR-4274	0	0	0	0	0	#N/A	#N/A	#N/A	#N/A
hsa-miR-4519	0	0	0	0	0	#N/A	#N/A	#N/A	#N/A
hsa-miR-449b-3p	0	0	0	0	0	#N/A	#N/A	#N/A	#N/A
hsa-miR-6858-3p	0	0	0	0	0	#N/A	#N/A	#N/A	#N/A
hsa-miR-4323	0	0	0	0	0	#N/A	#N/A	#N/A	#N/A
hsa-miR-3940-3p	0	0	0	0	0	#N/A	#N/A	#N/A	#N/A
hsa-miR-4687-5p	0	0	0	0	0	#N/A	#N/A	#N/A	#N/A
hsa-miR-6877-3p	0	0	0	0	0	#N/A	#N/A	#N/A	#N/A
hsa-miR-4293	0	0	0	0	0	#N/A	#N/A	#N/A	#N/A
hsa-miR-7846-3p	0	0	0	0	0	#N/A	#N/A	#N/A	#N/A
hsa-miR-6876-5p	0	0	0	0	0	#N/A	#N/A	#N/A	#N/A
hsa-miR-4476	0	0	0	0	0	#N/A	#N/A	#N/A	#N/A
hsa-miR-8083	0	0	0	0	0	#N/A	#N/A	#N/A	#N/A
hsa-miR-4695-5p	0	0	0	0	0	#N/A	#N/A	#N/A	#N/A
hsa-miR-4433b-3p	0	0	0	0	0	#N/A	#N/A	#N/A	#N/A
hsa-miR-4661-3p	0	0	0	0	0	#N/A	#N/A	#N/A	#N/A
hsa-miR-10524-5p	0	0	0	0	0	#N/A	#N/A	#N/A	#N/A
hsa-miR-1265	0	0	0	0	0	#N/A	#N/A	#N/A	#N/A
hsa-miR-3622a-5p	0	0	0	0	0	#N/A	#N/A	#N/A	#N/A
hsa-miR-6511a-5p	0	0	0	0	0	#N/A	#N/A	#N/A	#N/A
hsa-miR-6808-5p	0	0	0	0	0	#N/A	#N/A	#N/A	#N/A
hsa-miR-6893-5p	0	0	0	0	0	#N/A	#N/A	#N/A	#N/A
hsa-miR-15a-3p	0	0	0	0	0	#N/A	#N/A	#N/A	#N/A
hsa-miR-3186-5p	0	0	0	0	0	#N/A	#N/A	#N/A	#N/A
hsa-miR-5584-5p	0	0	0	0	0	#N/A	#N/A	#N/A	#N/A
hsa-miR-6750-5p	0	0	0	0	0	#N/A	#N/A	#N/A	#N/A
hsa-miR-6822-5p	0	0	0	0	0	#N/A	#N/A	#N/A	#N/A
hsa-miR-6760-5p	0	0	0	0	0	#N/A	#N/A	#N/A	#N/A
hsa-miR-4756-5p	0	0	0	0	0	#N/A	#N/A	#N/A	#N/A
hsa-miR-1321	0	0	0	0	0	#N/A	#N/A	#N/A	#N/A
hsa-miR-6735-5p	0	0	0	0	0	#N/A	#N/A	#N/A	#N/A
hsa-miR-4436b-3p	0	0	0	0	0	#N/A	#N/A	#N/A	#N/A
hsa-miR-6879-5p	0	0	0	0	0	#N/A	#N/A	#N/A	#N/A
hsa-miR-6895-5p	0	0	0	0	0	#N/A	#N/A	#N/A	#N/A
hsa-miR-7160-3p	0	0	0	0	0	#N/A	#N/A	#N/A	#N/A
hsa-miR-4512	0	0	0	0	0	#N/A	#N/A	#N/A	#N/A
hsa-miR-5088-5p	0	0	0	0	0	#N/A	#N/A	#N/A	#N/A
hsa-miR-4446-3p	0	0	0	0	0	#N/A	#N/A	#N/A	#N/A
hsa-miR-6813-5p	0	0	0	0	0	#N/A	#N/A	#N/A	#N/A
hsa-miR-6794-5p	0	0	0	0	0	#N/A	#N/A	#N/A	#N/A
hsa-miR-1178-5p	0	0	0	0	0	#N/A	#N/A	#N/A	#N/A
hsa-miR-3927-3p	0	0	0	0	0	#N/A	#N/A	#N/A	#N/A
hsa-miR-12114	0	0	0	0	0	#N/A	#N/A	#N/A	#N/A
hsa-miR-802	0	0	0	0	0	#N/A	#N/A	#N/A	#N/A
hsa-miR-8079	0	0	0	0	0	#N/A	#N/A	#N/A	#N/A
hsa-miR-8062	0	0	0	0	0	#N/A	#N/A	#N/A	#N/A
hsa-miR-3666	0	0	0	0	0	#N/A	#N/A	#N/A	#N/A
hsa-miR-4295	0	0	0	0	0	#N/A	#N/A	#N/A	#N/A
hsa-miR-3677-5p	0	0	0	0	0	#N/A	#N/A	#N/A	#N/A
hsa-miR-4255	0	0	0	0	0	#N/A	#N/A	#N/A	#N/A
hsa-miR-101-5p	0	0.726716	0	0	0	-29.9767	-4.90577	0.187048	#N/A
hsa-miR-5000-5p	0	0	0	0	0	#N/A	#N/A	#N/A	#N/A
hsa-miR-6874-3p	0	0	0	0	0	#N/A	#N/A	#N/A	#N/A
hsa-miR-4259	0	0	0	0	0	#N/A	#N/A	#N/A	#N/A
hsa-miR-142-5p	0	0	0.0845258	0	0	-5.01105	-2.32511	0.427651	#N/A
hsa-miR-4666a-3p	0	0	0	0	0	#N/A	#N/A	#N/A	#N/A
hsa-miR-10397-3p	0	0	0	0	0	#N/A	#N/A	#N/A	#N/A
hsa-miR-3651	0	0	0	0	0	#N/A	#N/A	#N/A	#N/A
hsa-miR-2115-3p	0	0	0	0	0	#N/A	#N/A	#N/A	#N/A
hsa-miR-3617-3p	0	0	0	0	0	#N/A	#N/A	#N/A	#N/A
hsa-miR-4800-3p	0.0881664	0	0	0	0	-2.87431	-1.52322	0.611005	#N/A
hsa-miR-3675-3p	0	0	0	0	0	#N/A	#N/A	#N/A	#N/A
hsa-miR-3126-3p	0	0.726716	0	0	0	-29.9767	-4.90577	0.187103	#N/A
hsa-miR-1298-3p	0	0	0	0	0	#N/A	#N/A	#N/A	#N/A
hsa-miR-200a-5p	0	0	0.0422629	0	0	-2.87368	-1.5229	0.611087	#N/A
hsa-miR-200b-5p	0	0	0.0422629	0	0	-2.87368	-1.5229	0.611087	#N/A
hsa-miR-141-5p	0	0	0	0	0	#N/A	#N/A	#N/A	#N/A
hsa-miR-4757-3p	0	0	0	0	0	#N/A	#N/A	#N/A	#N/A
hsa-miR-3146	0	0	0	0	0	#N/A	#N/A	#N/A	#N/A
hsa-miR-4728-3p	0	0.581373	0	0	0	-24.2308	-4.59877	0.209385	#N/A
hsa-miR-6871-5p	0	0	0	0	0	#N/A	#N/A	#N/A	#N/A
hsa-miR-6890-5p	0	0	0	0	0	#N/A	#N/A	#N/A	#N/A
hsa-miR-218-2-3p	0	0	0	0	0	#N/A	#N/A	#N/A	#N/A
hsa-miR-6504-3p	0	0	0	0	0	#N/A	#N/A	#N/A	#N/A
hsa-miR-4272	0	0	0	0	0	#N/A	#N/A	#N/A	#N/A
hsa-miR-6715a-3p	0	0	0	0	0	#N/A	#N/A	#N/A	#N/A
hsa-miR-4762-5p	0	0	0	0	0	#N/A	#N/A	#N/A	#N/A
hsa-miR-4714-3p	0	0	0	0	0	#N/A	#N/A	#N/A	#N/A
hsa-miR-6830-5p	0	0	0	0	0	#N/A	#N/A	#N/A	#N/A
hsa-miR-4275	0	0	0	0	0	#N/A	#N/A	#N/A	#N/A
hsa-miR-4733-3p	0	0	0	0	0	#N/A	#N/A	#N/A	#N/A
hsa-miR-181d-3p	0	0	0	0	0	#N/A	#N/A	#N/A	#N/A
hsa-miR-6767-3p	0	0	0	0	0	#N/A	#N/A	#N/A	#N/A
hsa-miR-6890-3p	0	0	0	0	0	#N/A	#N/A	#N/A	#N/A
hsa-miR-1324	0	0	0	0	0	#N/A	#N/A	#N/A	#N/A
hsa-miR-4494	0	0	0	0	0	#N/A	#N/A	#N/A	#N/A
hsa-miR-4756-3p	0	0	0	0	0	#N/A	#N/A	#N/A	#N/A
hsa-miR-6501-3p	0	0.968955	0	0	0	-39.5627	-5.30607	0.157456	#N/A
hsa-miR-4257	0	0	0	0	0	#N/A	#N/A	#N/A	#N/A
hsa-miR-4691-3p	0	0	0	0	0	#N/A	#N/A	#N/A	#N/A
hsa-miR-4768-3p	0	0	0	0	0	#N/A	#N/A	#N/A	#N/A
hsa-miR-3155b	0	0	0	0	0	#N/A	#N/A	#N/A	#N/A
hsa-miR-3155a	0	0	0	0	0	#N/A	#N/A	#N/A	#N/A
hsa-miR-6754-5p	0	0	0	0	0	#N/A	#N/A	#N/A	#N/A
hsa-miR-6798-5p	0	0	0	0	0	#N/A	#N/A	#N/A	#N/A
hsa-miR-16-1-3p	0	0	0	0	0	#N/A	#N/A	#N/A	#N/A
hsa-miR-5190	0	0	0	0	0	#N/A	#N/A	#N/A	#N/A
hsa-miR-194-3p	0	0	0	0	0	#N/A	#N/A	#N/A	#N/A
hsa-miR-4302	0	0	0	0	0	#N/A	#N/A	#N/A	#N/A
hsa-miR-4328	0	0	0	0	0	#N/A	#N/A	#N/A	#N/A
hsa-miR-8060	0	0	0	0	0	#N/A	#N/A	#N/A	#N/A
hsa-miR-10226	0	0	0	0	0	#N/A	#N/A	#N/A	#N/A
hsa-miR-9902	0	0	0	0	0	#N/A	#N/A	#N/A	#N/A
hsa-miR-488-5p	0	0	0	0	0	#N/A	#N/A	#N/A	#N/A
hsa-miR-4530	0	0	0	0	0	#N/A	#N/A	#N/A	#N/A
hsa-miR-4685-5p	0	0	0	0	0	#N/A	#N/A	#N/A	#N/A
hsa-miR-199b-5p	0	0	0	0	0.6327	53.0081	5.72814	0.0913254	#N/A
hsa-miR-6884-3p	0	0	0	0	0	#N/A	#N/A	#N/A	#N/A
hsa-miR-6872-3p	0	0	0	0	0	#N/A	#N/A	#N/A	#N/A
hsa-miR-1224-3p	0	0	0	0	0	#N/A	#N/A	#N/A	#N/A
hsa-miR-1915-3p	0	0	0	0	0	#N/A	#N/A	#N/A	#N/A
hsa-miR-4258	0	0	0	0	0	#N/A	#N/A	#N/A	#N/A
hsa-miR-1247-3p	0	0	0	0	0	#N/A	#N/A	#N/A	#N/A
hsa-miR-4783-3p	0	0	0	0	0	#N/A	#N/A	#N/A	#N/A
hsa-miR-4292	0	0	0	0	0	#N/A	#N/A	#N/A	#N/A
hsa-miR-6791-5p	0	0	0	0	0	#N/A	#N/A	#N/A	#N/A
hsa-miR-6886-5p	0	0	0	0	0	#N/A	#N/A	#N/A	#N/A
hsa-miR-1203	0	0	0	0	0	#N/A	#N/A	#N/A	#N/A
hsa-miR-6850-3p	0	0	0	0	0	#N/A	#N/A	#N/A	#N/A
hsa-miR-6891-3p	0	0	0	0	0	#N/A	#N/A	#N/A	#N/A
hsa-miR-4723-3p	0	0	0	0	0	#N/A	#N/A	#N/A	#N/A
hsa-miR-6769b-3p	0	0	0	0	0	#N/A	#N/A	#N/A	#N/A
hsa-miR-4324	0	0	0	0	0	#N/A	#N/A	#N/A	#N/A
hsa-miR-6893-3p	0	0	0	0	0	#N/A	#N/A	#N/A	#N/A
hsa-miR-939-3p	0	0	0	0	0	#N/A	#N/A	#N/A	#N/A
hsa-miR-6852-5p	0	0.872059	0	0	0	-35.7271	-5.15895	0.17008	#N/A
hsa-miR-1914-5p	0	0.290686	0	0	0	-12.7573	-3.67325	0.27505	#N/A
hsa-miR-1266-3p	0	0	0	0	0	#N/A	#N/A	#N/A	#N/A
hsa-miR-6078	0	0	0	0	0	#N/A	#N/A	#N/A	#N/A
hsa-miR-6880-3p	0	0	0	0	0	#N/A	#N/A	#N/A	#N/A
hsa-miR-4315	0	0	0	0	0	#N/A	#N/A	#N/A	#N/A
hsa-miR-4304	0	0	0	0	0	#N/A	#N/A	#N/A	#N/A
hsa-miR-10392-3p	0	0	0	0	0	#N/A	#N/A	#N/A	#N/A
hsa-miR-6746-5p	0	0	0	0	0	#N/A	#N/A	#N/A	#N/A
hsa-miR-5090	0	0	0	0	0	#N/A	#N/A	#N/A	#N/A
hsa-miR-4746-5p	0	0	0	0	0	#N/A	#N/A	#N/A	#N/A
hsa-miR-6070	0	0	0	0	0	#N/A	#N/A	#N/A	#N/A
hsa-miR-1181	0	0	0	0	0	#N/A	#N/A	#N/A	#N/A
hsa-miR-4735-5p	0	0	0	0	0	#N/A	#N/A	#N/A	#N/A
hsa-miR-8067	0	0	0	0	0	#N/A	#N/A	#N/A	#N/A
hsa-miR-4305	0	0	0	0	0	#N/A	#N/A	#N/A	#N/A
hsa-miR-325	0	0	0	0	0	#N/A	#N/A	#N/A	#N/A
hsa-miR-372-5p	0	0	0	0	0	#N/A	#N/A	#N/A	#N/A
hsa-miR-6862-3p	0	0	0	0	0	#N/A	#N/A	#N/A	#N/A
hsa-miR-4330	0	0	0	0	0	#N/A	#N/A	#N/A	#N/A
hsa-miR-1266-5p	0	0	0	0	0	#N/A	#N/A	#N/A	#N/A
hsa-miR-519d-5p	0	0	0	0	0	#N/A	#N/A	#N/A	#N/A
hsa-miR-7113-3p	0	0	0	0	0	#N/A	#N/A	#N/A	#N/A
hsa-miR-1976	0	0	0	0	0	#N/A	#N/A	#N/A	#N/A
hsa-miR-8088	0	0	0	0	0	#N/A	#N/A	#N/A	#N/A
hsa-miR-520f-5p	0	0	0	0	0	#N/A	#N/A	#N/A	#N/A
hsa-miR-520b-5p	0	0	0	0	0	#N/A	#N/A	#N/A	#N/A
hsa-miR-517-5p	0	0	0	0	0	#N/A	#N/A	#N/A	#N/A
hsa-miR-3059-3p	0	0	0	0	0	#N/A	#N/A	#N/A	#N/A
hsa-miR-6845-3p	0	0	0	0	0	#N/A	#N/A	#N/A	#N/A
hsa-miR-146a-3p	0	0	0.464892	0	0	-19.9371	-4.31738	0.230619	#N/A
hsa-miR-6730-3p	0	0	0	0	0	#N/A	#N/A	#N/A	#N/A
hsa-miR-4750-3p	0	0	0	0	0	#N/A	#N/A	#N/A	#N/A
hsa-miR-4251	0	0	0	0	0	#N/A	#N/A	#N/A	#N/A
hsa-miR-4329	0	0	0	0	0	#N/A	#N/A	#N/A	#N/A
hsa-miR-1199-5p	0	0	0	0	0	#N/A	#N/A	#N/A	#N/A
hsa-miR-3151-3p	0	0	0	0	0	#N/A	#N/A	#N/A	#N/A
hsa-miR-4772-3p	0	0	0	0	0	#N/A	#N/A	#N/A	#N/A
hsa-miR-3158-5p	0	0	0	0	0	#N/A	#N/A	#N/A	#N/A
hsa-miR-1184	0	0	0	0	0	#N/A	#N/A	#N/A	#N/A
hsa-miR-6068	0	0	0	0	0	#N/A	#N/A	#N/A	#N/A
hsa-miR-4520-5p	0	0	0	0	0	#N/A	#N/A	#N/A	#N/A
hsa-miR-3692-5p	0	0	0	0	0	#N/A	#N/A	#N/A	#N/A
hsa-miR-875-3p	0	0	0	0	0	#N/A	#N/A	#N/A	#N/A
hsa-miR-4638-3p	0	0	0.549418	0	0	-23.2582	-4.53967	0.215678	#N/A
hsa-miR-4720-5p	0	0	0	0	0	#N/A	#N/A	#N/A	#N/A
hsa-miR-3187-5p	0	0	0	0	0	#N/A	#N/A	#N/A	#N/A
hsa-miR-8089	0	0	0	0	0	#N/A	#N/A	#N/A	#N/A
hsa-miR-4456	0	0	0	0	0	#N/A	#N/A	#N/A	#N/A
hsa-miR-3120-5p	0	0	0	0	0	#N/A	#N/A	#N/A	#N/A
hsa-miR-6529-3p	0	0	0	0	0	#N/A	#N/A	#N/A	#N/A
hsa-miR-5008-3p	0	0	0	0	0	#N/A	#N/A	#N/A	#N/A
hsa-miR-1267	0	0	0	0	0	#N/A	#N/A	#N/A	#N/A
hsa-miR-6837-3p	0	0	0	0	0	#N/A	#N/A	#N/A	#N/A
hsa-miR-6790-3p	0	0	0	0	0	#N/A	#N/A	#N/A	#N/A
hsa-miR-2114-3p	0	0	0	0	0	#N/A	#N/A	#N/A	#N/A
hsa-miR-3616-3p	0	0	0	0	0	#N/A	#N/A	#N/A	#N/A
hsa-miR-6738-5p	0	0	0	0	0	#N/A	#N/A	#N/A	#N/A
hsa-miR-6804-3p	0	0	0	0	0	#N/A	#N/A	#N/A	#N/A
hsa-miR-3166	0	0	0	0	0	#N/A	#N/A	#N/A	#N/A
hsa-miR-6836-5p	0	0	0	0	0	#N/A	#N/A	#N/A	#N/A
hsa-miR-1909-3p	0	0	0	0	0	#N/A	#N/A	#N/A	#N/A
hsa-miR-6869-3p	0	0	0	0	0	#N/A	#N/A	#N/A	#N/A
hsa-miR-4763-5p	0	0	0	0	0	#N/A	#N/A	#N/A	#N/A
hsa-miR-3195	0	0	0	0	0	#N/A	#N/A	#N/A	#N/A
hsa-miR-6720-3p	0	0	0	0	0	#N/A	#N/A	#N/A	#N/A
hsa-miR-4767	0	0	0	0	0	#N/A	#N/A	#N/A	#N/A
hsa-miR-3621	0	0	0	0	0	#N/A	#N/A	#N/A	#N/A
hsa-miR-1301-5p	0	0	0	0	0	#N/A	#N/A	#N/A	#N/A
hsa-miR-9851-5p	0	0	0	0	0	#N/A	#N/A	#N/A	#N/A
hsa-miR-1251-3p	0	0	0	0	0	#N/A	#N/A	#N/A	#N/A
hsa-miR-1255b-5p	0	0	0.760732	0	0	-31.5838	-4.98111	0.188312	#N/A
hsa-miR-196a-3p	0	0	0	0	0	#N/A	#N/A	#N/A	#N/A
hsa-miR-1538	0	0	0	0	0	#N/A	#N/A	#N/A	#N/A
hsa-miR-6789-3p	0	0	0	0	0	#N/A	#N/A	#N/A	#N/A
hsa-miR-4634	0	0.0484477	0	0	0	-2.87383	-1.52298	0.611067	#N/A
hsa-miR-10400-5p	0	0.0484477	0.126789	0	0	-9.28547	-3.21497	0.302907	#N/A
hsa-miR-10396b-5p	0	0	0	0	0	#N/A	#N/A	#N/A	#N/A
hsa-miR-3652	0	0	0	0	0	#N/A	#N/A	#N/A	#N/A
hsa-miR-8052	0	0	0	0	0	#N/A	#N/A	#N/A	#N/A
hsa-miR-6726-5p	0	0	0	0	0	#N/A	#N/A	#N/A	#N/A
hsa-miR-6862-5p	0	0	0	0	0	#N/A	#N/A	#N/A	#N/A
hsa-miR-6781-5p	0	0	0	0	0	#N/A	#N/A	#N/A	#N/A
hsa-miR-9899	0	0	0	0	0	#N/A	#N/A	#N/A	#N/A
hsa-miR-4741	0	0	0	0	0	#N/A	#N/A	#N/A	#N/A
hsa-miR-3175	0	0.920507	0	0	0	-37.6447	-5.23438	0.161461	#N/A
hsa-miR-486-3p	0.264499	0.0484477	0.169052	0	0	-17.8422	-4.15723	0.209889	#N/A
hsa-miR-6845-5p	0	0	0	0	0	#N/A	#N/A	#N/A	#N/A
hsa-miR-6762-5p	0	0	0	0	0	#N/A	#N/A	#N/A	#N/A
hsa-miR-3196	0	0	0	0	0	#N/A	#N/A	#N/A	#N/A
hsa-miR-1237-5p	0	0	0	0	0	#N/A	#N/A	#N/A	#N/A
hsa-miR-4651	0	0	0	0	0	#N/A	#N/A	#N/A	#N/A
hsa-miR-363-5p	0	0	0	0	0	#N/A	#N/A	#N/A	#N/A
hsa-miR-6766-5p	0	0	0	0	0	#N/A	#N/A	#N/A	#N/A
hsa-miR-12130	0	0	0	0	0	#N/A	#N/A	#N/A	#N/A
hsa-miR-9901	0	0	0	0.624685	0.0575182	56.2158	5.8129	0.0825701	#N/A
hsa-miR-8071	0	0	0	0	0	#N/A	#N/A	#N/A	#N/A
hsa-miR-4433a-5p	0	0	0	0	0	#N/A	#N/A	#N/A	#N/A
hsa-miR-4449	0	0	0	0	0	#N/A	#N/A	#N/A	#N/A
hsa-miR-200c-5p	0	0	0	0	0	#N/A	#N/A	#N/A	#N/A
hsa-miR-7847-3p	0	0	0	0	0	#N/A	#N/A	#N/A	#N/A
hsa-miR-8056	0	0	0	0	0	#N/A	#N/A	#N/A	#N/A
hsa-miR-223-5p	0	0	0.126789	0	0	-6.80986	-2.76762	0.354443	#N/A
hsa-miR-4711-3p	0	0	0	0	0	#N/A	#N/A	#N/A	#N/A
hsa-miR-10401-5p	0	0	0	0	0	#N/A	#N/A	#N/A	#N/A
hsa-miR-124-5p	0	0	0	0	0	#N/A	#N/A	#N/A	#N/A
hsa-miR-633	0	0	0	0	0	#N/A	#N/A	#N/A	#N/A
hsa-miR-524-5p	0	0	0	0	0	#N/A	#N/A	#N/A	#N/A
hsa-miR-520d-5p	0	0	0	0	0	#N/A	#N/A	#N/A	#N/A
hsa-miR-7151-3p	0	0	0	0	0	#N/A	#N/A	#N/A	#N/A
hsa-miR-6798-3p	0	0	0	0	0	#N/A	#N/A	#N/A	#N/A
hsa-miR-7848-3p	0	0	0	0	0	#N/A	#N/A	#N/A	#N/A
hsa-miR-3682-5p	0	0.678268	0	0	0	-28.0608	-4.81048	0.193107	#N/A
hsa-miR-585-5p	0	0	0	0	0	#N/A	#N/A	#N/A	#N/A
hsa-miR-4266	0	0	0	0	0	#N/A	#N/A	#N/A	#N/A
hsa-miR-4278	0	0	0	0	0	#N/A	#N/A	#N/A	#N/A
hsa-miR-6802-5p	0	0	0	0	0	#N/A	#N/A	#N/A	#N/A
hsa-miR-921	0	0	0	0	0	#N/A	#N/A	#N/A	#N/A
hsa-miR-190a-3p	0	0	0	0	0	#N/A	#N/A	#N/A	#N/A
hsa-miR-8074	0	0	0	0	0	#N/A	#N/A	#N/A	#N/A
hsa-miR-4477a	0	0	0	0	0	#N/A	#N/A	#N/A	#N/A
hsa-miR-6715b-3p	0	0	0	0	0	#N/A	#N/A	#N/A	#N/A
hsa-miR-520e-5p	0	0	0	0	0	#N/A	#N/A	#N/A	#N/A
hsa-miR-4465	0	0	0	0	0	#N/A	#N/A	#N/A	#N/A
hsa-miR-6794-3p	0	0	0	0	0	#N/A	#N/A	#N/A	#N/A
hsa-miR-181b-3p	0	0	0.59168	0	0	-24.9211	-4.63929	0.207434	#N/A
hsa-miR-181b-2-3p	0	0	0	0	0	#N/A	#N/A	#N/A	#N/A
hsa-miR-4276	0	0	0	0	0	#N/A	#N/A	#N/A	#N/A
hsa-miR-452-3p	0	0	0	0	0	#N/A	#N/A	#N/A	#N/A
hsa-miR-1912-5p	0	0	0	0	0	#N/A	#N/A	#N/A	#N/A
hsa-miR-5696	0	0	0	0	0	#N/A	#N/A	#N/A	#N/A
hsa-miR-520a-5p	0	0	0	0	0	#N/A	#N/A	#N/A	#N/A
hsa-miR-525-5p	0	0	0	0	0	#N/A	#N/A	#N/A	#N/A
hsa-miR-188-3p	0	0	0	0	0	#N/A	#N/A	#N/A	#N/A
hsa-miR-3156-3p	0	0	0	0	0	#N/A	#N/A	#N/A	#N/A
hsa-miR-6763-3p	0	0	0	0	0	#N/A	#N/A	#N/A	#N/A
hsa-miR-6826-3p	0	0	0	0	0	#N/A	#N/A	#N/A	#N/A
hsa-miR-4497	0.0881664	0	0.0422629	0	0	-5.01216	-2.32543	0.427564	#N/A
hsa-miR-155-3p	0	0	0	0	0	#N/A	#N/A	#N/A	#N/A
hsa-miR-6792-3p	0	0	0	0	0	#N/A	#N/A	#N/A	#N/A
hsa-miR-6780a-3p	0	0.339134	0	0	0	-14.6682	-3.87462	0.253356	#N/A
hsa-miR-1200	0	0	0	0	0	#N/A	#N/A	#N/A	#N/A
hsa-miR-4444	0	0	0	0	0	#N/A	#N/A	#N/A	#N/A
hsa-miR-6726-3p	0.0881664	0	0.0845258	0	0	-7.14973	-2.83789	0.349532	#N/A
hsa-miR-4665-3p	0	0	0	0	0	#N/A	#N/A	#N/A	#N/A
hsa-miR-1469	0	0	0	0	0	#N/A	#N/A	#N/A	#N/A
hsa-miR-6771-5p	0	0	0	0	0	#N/A	#N/A	#N/A	#N/A
hsa-miR-4750-5p	0	0	0	0	0	#N/A	#N/A	#N/A	#N/A
hsa-miR-6727-5p	0	0	0	0	0	#N/A	#N/A	#N/A	#N/A
hsa-miR-3677-3p	0	0	0	0	0	#N/A	#N/A	#N/A	#N/A
hsa-miR-518f-5p	0	0	0	0	0	#N/A	#N/A	#N/A	#N/A
hsa-miR-526a-5p	0	0	0	0	0	#N/A	#N/A	#N/A	#N/A
hsa-miR-519c-5p	0	0	0	0	0	#N/A	#N/A	#N/A	#N/A
hsa-miR-1287-3p	0	0	0.760732	0	0	-31.5838	-4.98111	0.188403	#N/A
hsa-miR-6867-3p	0	0	0	0	0	#N/A	#N/A	#N/A	#N/A
hsa-miR-4279	0	0	0	0	0	#N/A	#N/A	#N/A	#N/A
hsa-miR-4684-5p	0	0	0	0	0	#N/A	#N/A	#N/A	#N/A
hsa-miR-3191-5p	0	0	0	0	0	#N/A	#N/A	#N/A	#N/A
hsa-miR-3192-3p	0	0	0	0	0	#N/A	#N/A	#N/A	#N/A
hsa-miR-4314	0	0	0	0	0	#N/A	#N/A	#N/A	#N/A
hsa-miR-526b-5p	0	0	0	0	0	#N/A	#N/A	#N/A	#N/A
hsa-miR-7158-3p	0	0	0	0	0	#N/A	#N/A	#N/A	#N/A
hsa-miR-573	0	0	0	0	0	#N/A	#N/A	#N/A	#N/A
hsa-miR-3136-5p	0	0	0	0	0	#N/A	#N/A	#N/A	#N/A
hsa-miR-943	0	0	0	0	0	#N/A	#N/A	#N/A	#N/A
hsa-miR-3161	0	0	0	0	0	#N/A	#N/A	#N/A	#N/A
hsa-miR-518a-5p	0	0	0	0	0	#N/A	#N/A	#N/A	#N/A
hsa-miR-106a-3p	0	0	0	0	0	#N/A	#N/A	#N/A	#N/A
hsa-miR-1273h-3p	0	0	0	0	0	#N/A	#N/A	#N/A	#N/A
hsa-miR-3678-3p	0	0	0	0	0	#N/A	#N/A	#N/A	#N/A
hsa-miR-7156-3p	0	0	0	0	0	#N/A	#N/A	#N/A	#N/A
hsa-miR-6511b-5p	0	0	0.59168	0	0	-24.9211	-4.63929	0.207532	#N/A
hsa-miR-192-3p	0	0	0	0	0	#N/A	#N/A	#N/A	#N/A
hsa-miR-12121	0	0	0	0	0	#N/A	#N/A	#N/A	#N/A
hsa-miR-3972	0	0	0	0	0	#N/A	#N/A	#N/A	#N/A
hsa-miR-4659a-5p	0	0	0	0	0	#N/A	#N/A	#N/A	#N/A
hsa-miR-3157-3p	0	0	0	0	0	#N/A	#N/A	#N/A	#N/A
hsa-miR-1269b	0	0	0	0	0	#N/A	#N/A	#N/A	#N/A
hsa-miR-1269a	0	0	0	0	0	#N/A	#N/A	#N/A	#N/A
hsa-miR-8058	0	0	0	0	0	#N/A	#N/A	#N/A	#N/A
hsa-miR-1270	0	0	0	0	0	#N/A	#N/A	#N/A	#N/A
hsa-miR-4309	0	0	0	0	0	#N/A	#N/A	#N/A	#N/A
hsa-miR-7150	0	0	0	0	0	#N/A	#N/A	#N/A	#N/A
hsa-miR-4730	0	0.726716	0	0	0.0575182	-6.7016	-2.74451	0.340966	#N/A
hsa-miR-4298	0	0	0	0	0	#N/A	#N/A	#N/A	#N/A
hsa-miR-6788-5p	0	0	0	0	0	#N/A	#N/A	#N/A	#N/A
hsa-miR-6779-5p	0	0	0	0	0	#N/A	#N/A	#N/A	#N/A
hsa-miR-1273h-5p	0	0	0	0	0	#N/A	#N/A	#N/A	#N/A
hsa-miR-3689a-3p	0	0	0	0	0	#N/A	#N/A	#N/A	#N/A
hsa-miR-3689b-3p	0	0	0	0	0	#N/A	#N/A	#N/A	#N/A
hsa-miR-10400-3p	0	0	0	0	0	#N/A	#N/A	#N/A	#N/A
hsa-miR-4674	0	0	0	0	0	#N/A	#N/A	#N/A	#N/A
hsa-miR-3150a-3p	0	0	0	0	0	#N/A	#N/A	#N/A	#N/A
hsa-miR-6763-5p	0	0	0	0.0624685	0	6.19873	2.63197	0.342131	#N/A
hsa-miR-4665-5p	0	0	0	0	0	#N/A	#N/A	#N/A	#N/A
hsa-miR-7109-5p	0	0	0	0	0	#N/A	#N/A	#N/A	#N/A
hsa-miR-6803-5p	0	0	0	0	0	#N/A	#N/A	#N/A	#N/A
hsa-miR-3170	0	0	0	0	0	#N/A	#N/A	#N/A	#N/A
hsa-miR-6736-5p	0	0	0	0	0	#N/A	#N/A	#N/A	#N/A
hsa-miR-4507	0	0	0	0	0	#N/A	#N/A	#N/A	#N/A
hsa-miR-150-3p	0	0	0	0	0	#N/A	#N/A	#N/A	#N/A
hsa-miR-2054	0	0	0	0	0	#N/A	#N/A	#N/A	#N/A
hsa-miR-675-3p	0	0	0	0	0	#N/A	#N/A	#N/A	#N/A
hsa-miR-676-3p	0	1.0174	0	0	0	-41.4809	-5.37437	0.154342	#N/A
hsa-miR-4322	0	0	0	0	0	#N/A	#N/A	#N/A	#N/A
hsa-miR-4265	0	0	0	0	0	#N/A	#N/A	#N/A	#N/A
hsa-miR-7702	0	0	0.211314	0	0	-10.0427	-3.32808	0.303265	#N/A
hsa-miR-8061	0	0	0	0	0	#N/A	#N/A	#N/A	#N/A
hsa-miR-6083	0	0	0	0	0	#N/A	#N/A	#N/A	#N/A
hsa-miR-491-3p	0	0	0	0	0	#N/A	#N/A	#N/A	#N/A
hsa-miR-3180-5p	0	0.532925	0	0	0	-22.3167	-4.48005	0.216097	#N/A
hsa-miR-3679-3p	0	0	0	0	0	#N/A	#N/A	#N/A	#N/A
hsa-miR-718	0	0	0	0	0	#N/A	#N/A	#N/A	#N/A
hsa-miR-4664-3p	0	0	0	0	0	#N/A	#N/A	#N/A	#N/A
hsa-miR-1238-3p	0	0	0	0	0	#N/A	#N/A	#N/A	#N/A
hsa-miR-6809-3p	0	0	0	0	0	#N/A	#N/A	#N/A	#N/A
hsa-miR-4762-3p	0	0	0	0	0	#N/A	#N/A	#N/A	#N/A
hsa-miR-578	0	0	0	0	0	#N/A	#N/A	#N/A	#N/A
hsa-miR-8081	0	0	0	0	0	#N/A	#N/A	#N/A	#N/A
hsa-miR-4776-3p	0	0	0	0	0	#N/A	#N/A	#N/A	#N/A
hsa-miR-5004-3p	0	0	0	0	0	#N/A	#N/A	#N/A	#N/A
hsa-miR-12133	0	0	0	0	0	#N/A	#N/A	#N/A	#N/A
hsa-miR-4260	0	0	0	0	0	#N/A	#N/A	#N/A	#N/A
hsa-miR-659-3p	0	0	0	0	0	#N/A	#N/A	#N/A	#N/A
hsa-miR-8055	0	0	0	0	0	#N/A	#N/A	#N/A	#N/A
hsa-miR-548ad-3p	0	0	0	0	0	#N/A	#N/A	#N/A	#N/A
hsa-miR-4668-3p	0	0	0	0	0	#N/A	#N/A	#N/A	#N/A
hsa-miR-3662	0	0	0	0	0	#N/A	#N/A	#N/A	#N/A
hsa-miR-4311	0	0	0	0	0	#N/A	#N/A	#N/A	#N/A
hsa-miR-518a-3p	0	0	0	0	0	#N/A	#N/A	#N/A	#N/A
hsa-miR-526a-3p	0	0	0	0	0	#N/A	#N/A	#N/A	#N/A
hsa-miR-518f-3p	0	0	0	0	0	#N/A	#N/A	#N/A	#N/A
hsa-miR-548aq-5p	0	0.629821	0	0	0	-26.1455	-4.70849	0.203682	#N/A
hsa-miR-8054	0	0	0	0	0	#N/A	#N/A	#N/A	#N/A
hsa-miR-526b-3p	0	0	0	0	0	#N/A	#N/A	#N/A	#N/A
hsa-miR-551b-5p	0	0	0	0	0	#N/A	#N/A	#N/A	#N/A
hsa-miR-614	0	0	0	0	0	#N/A	#N/A	#N/A	#N/A
hsa-miR-523-3p	0	0	0	0	0	#N/A	#N/A	#N/A	#N/A
hsa-miR-6750-3p	0	0	0	0	0	#N/A	#N/A	#N/A	#N/A
hsa-miR-4511	0	0	0	0	0	#N/A	#N/A	#N/A	#N/A
hsa-miR-6507-5p	0	0	0	0	0	#N/A	#N/A	#N/A	#N/A
hsa-miR-8087	0	0	0	0	0	#N/A	#N/A	#N/A	#N/A
hsa-miR-4426	0	0	0	0	0	#N/A	#N/A	#N/A	#N/A
hsa-miR-4647	0	0	0	0	0	#N/A	#N/A	#N/A	#N/A
hsa-miR-6796-3p	0	0	0	0	0	#N/A	#N/A	#N/A	#N/A
hsa-miR-8080	0	0	0	0	0	#N/A	#N/A	#N/A	#N/A
hsa-miR-6816-3p	0	0	0	0	0	#N/A	#N/A	#N/A	#N/A
hsa-miR-3714	0	0	0	0	0	#N/A	#N/A	#N/A	#N/A
hsa-miR-525-3p	0	0	0	0	0	#N/A	#N/A	#N/A	#N/A
hsa-miR-524-3p	0	0	0	0	0	#N/A	#N/A	#N/A	#N/A
hsa-miR-373-3p	0	0	0	0	0	#N/A	#N/A	#N/A	#N/A
hsa-miR-12117	0	0	0	0	0	#N/A	#N/A	#N/A	#N/A
hsa-miR-595	0	0	0	0	0	#N/A	#N/A	#N/A	#N/A
hsa-miR-6082	0	0	0	0	0	#N/A	#N/A	#N/A	#N/A
hsa-miR-8084	0	0	0	0	0	#N/A	#N/A	#N/A	#N/A
hsa-miR-5583-3p	0	0	0	0	0	#N/A	#N/A	#N/A	#N/A
hsa-miR-3610	0	0	0	0	0	#N/A	#N/A	#N/A	#N/A
hsa-miR-10523-5p	0	0	0	0	0	#N/A	#N/A	#N/A	#N/A
hsa-miR-7849-3p	0	0	0	0	0	#N/A	#N/A	#N/A	#N/A
hsa-miR-4643	0	0	0	0	0	#N/A	#N/A	#N/A	#N/A
hsa-miR-602	0	0	0	0	0	#N/A	#N/A	#N/A	#N/A
hsa-miR-4704-5p	0	0	0	0	0	#N/A	#N/A	#N/A	#N/A
hsa-miR-4797-5p	0	0	0	0	0	#N/A	#N/A	#N/A	#N/A
hsa-miR-4262	0	0	0	0	0	#N/A	#N/A	#N/A	#N/A
hsa-miR-4523	0	0	0	0	0	#N/A	#N/A	#N/A	#N/A
hsa-miR-619-3p	0	0	0	0	0	#N/A	#N/A	#N/A	#N/A
hsa-miR-3680-5p	0	0	0	0	0	#N/A	#N/A	#N/A	#N/A
hsa-miR-888-3p	0	0	0	0	0	#N/A	#N/A	#N/A	#N/A
hsa-miR-3654	0	0	0	0	0	#N/A	#N/A	#N/A	#N/A
hsa-miR-12126	0	0	0	0	0	#N/A	#N/A	#N/A	#N/A
hsa-miR-5680	0	0	0	0	0	#N/A	#N/A	#N/A	#N/A
hsa-miR-4524b-3p	0	0	0	0	0	#N/A	#N/A	#N/A	#N/A
hsa-miR-4463	0	0	0	0	0	#N/A	#N/A	#N/A	#N/A
hsa-miR-6529-5p	0	0	0	0	0	#N/A	#N/A	#N/A	#N/A
hsa-miR-2278	0	0	0	0	0	#N/A	#N/A	#N/A	#N/A
hsa-miR-6859-5p	0	0	0	0	0	#N/A	#N/A	#N/A	#N/A
hsa-miR-3908	0	0	0	0	0	#N/A	#N/A	#N/A	#N/A
hsa-miR-4690-5p	0	0	0	0	0	#N/A	#N/A	#N/A	#N/A
hsa-miR-4676-5p	0	0	0	0	0	#N/A	#N/A	#N/A	#N/A
hsa-miR-575	0	0	0	0	0	#N/A	#N/A	#N/A	#N/A
hsa-miR-6769a-3p	0	0	0	0	0	#N/A	#N/A	#N/A	#N/A
hsa-miR-4538	0	0	0	0	0	#N/A	#N/A	#N/A	#N/A
hsa-miR-4453	0	0	0	0	0	#N/A	#N/A	#N/A	#N/A
hsa-miR-208a-5p	0	0	0	0	0	#N/A	#N/A	#N/A	#N/A
hsa-miR-4496	0	0	0	0	0	#N/A	#N/A	#N/A	#N/A
hsa-miR-12124	0	0	0	0	0	#N/A	#N/A	#N/A	#N/A
hsa-miR-4478	0	0	0	0	0	#N/A	#N/A	#N/A	#N/A
hsa-miR-3929	0	0	0	0	0	#N/A	#N/A	#N/A	#N/A
hsa-miR-7843-5p	0	0	0	0	0	#N/A	#N/A	#N/A	#N/A
hsa-miR-4632-5p	0	0	0	0	0	#N/A	#N/A	#N/A	#N/A
hsa-miR-4761-3p	0	0	0	0	0	#N/A	#N/A	#N/A	#N/A
hsa-miR-3141	0	0	0	0	0	#N/A	#N/A	#N/A	#N/A
hsa-miR-1182	0	0	0	0	0	#N/A	#N/A	#N/A	#N/A
hsa-miR-296-3p	0	0	0	0	0	#N/A	#N/A	#N/A	#N/A
hsa-miR-4748	0	0	0	0	0	#N/A	#N/A	#N/A	#N/A
hsa-miR-515-3p	0	0	0	0	0	#N/A	#N/A	#N/A	#N/A
hsa-miR-6849-5p	0	0	0	0	0	#N/A	#N/A	#N/A	#N/A
hsa-miR-1296-3p	0	0	0	0	0	#N/A	#N/A	#N/A	#N/A
hsa-miR-4280	0	0	0	0	0	#N/A	#N/A	#N/A	#N/A
hsa-miR-3168	0	0	0	0	0	#N/A	#N/A	#N/A	#N/A
hsa-miR-3074-3p	0	0	0	0	0	#N/A	#N/A	#N/A	#N/A
hsa-miR-6074	0	0	0	0	0	#N/A	#N/A	#N/A	#N/A
hsa-miR-7151-5p	0	0	0	0	0	#N/A	#N/A	#N/A	#N/A
hsa-miR-6866-3p	0	0	0	0	0	#N/A	#N/A	#N/A	#N/A
hsa-miR-556-5p	0	0	0	0	0	#N/A	#N/A	#N/A	#N/A
hsa-miR-1272	0	0	0	0	0	#N/A	#N/A	#N/A	#N/A
hsa-miR-1322	0	0	0	0	0	#N/A	#N/A	#N/A	#N/A
hsa-miR-12129	0	0	0	0	0	#N/A	#N/A	#N/A	#N/A
hsa-miR-205-3p	0	0	0	0	0	#N/A	#N/A	#N/A	#N/A
hsa-miR-500b-3p	0	0	0	0	0	#N/A	#N/A	#N/A	#N/A
hsa-miR-3919	0	0	0	0	0	#N/A	#N/A	#N/A	#N/A
hsa-miR-759	0	0	0	0	0	#N/A	#N/A	#N/A	#N/A
hsa-miR-1288-5p	0	0	0	0	0	#N/A	#N/A	#N/A	#N/A
hsa-miR-922	0	0	0	0	0	#N/A	#N/A	#N/A	#N/A
hsa-miR-761	0	0	0	0	0	#N/A	#N/A	#N/A	#N/A
hsa-miR-4310	0	0	0	0	0	#N/A	#N/A	#N/A	#N/A
hsa-miR-4690-3p	0	0	0	0	0	#N/A	#N/A	#N/A	#N/A
hsa-miR-873-5p	0	0	0	0	0	#N/A	#N/A	#N/A	#N/A
hsa-miR-4436a	0	0	0	0	0	#N/A	#N/A	#N/A	#N/A
hsa-miR-4269	0	0	0	0	0	#N/A	#N/A	#N/A	#N/A
hsa-miR-211-3p	0	0	0	0	0	#N/A	#N/A	#N/A	#N/A
hsa-miR-764	0	0	0	0	0	#N/A	#N/A	#N/A	#N/A
hsa-miR-3129-5p	0	0	0	0	0	#N/A	#N/A	#N/A	#N/A
hsa-miR-5693	0	0	0	0	0	#N/A	#N/A	#N/A	#N/A
hsa-miR-4277	0	0	0	0	0	#N/A	#N/A	#N/A	#N/A
hsa-miR-4289	0	0	0	0	0	#N/A	#N/A	#N/A	#N/A
hsa-miR-186-3p	0	0	0	0	0	#N/A	#N/A	#N/A	#N/A
hsa-miR-6840-3p	0	0	0	0	0	#N/A	#N/A	#N/A	#N/A
hsa-miR-4707-5p	0	0	0	0	0	#N/A	#N/A	#N/A	#N/A
hsa-miR-5587-3p	0	0	0	0	0	#N/A	#N/A	#N/A	#N/A
hsa-miR-4740-3p	0	0	0	0	0	#N/A	#N/A	#N/A	#N/A
hsa-miR-1471	0	0	0	0	0	#N/A	#N/A	#N/A	#N/A
hsa-miR-10398-3p	0	0	0	0	0	#N/A	#N/A	#N/A	#N/A
hsa-miR-1470	0	0	0	0	0	#N/A	#N/A	#N/A	#N/A
hsa-miR-2276-5p	0	0	0	0	0	#N/A	#N/A	#N/A	#N/A
hsa-miR-345-3p	0	0	0	0	0	#N/A	#N/A	#N/A	#N/A
hsa-miR-4732-3p	0	0	0.549418	0	0	-23.2582	-4.53967	0.216017	#N/A
hsa-miR-146b-3p	0	0	0	0	0	#N/A	#N/A	#N/A	#N/A
hsa-miR-4442	0	0	0	0	0	#N/A	#N/A	#N/A	#N/A
hsa-miR-6784-5p	0	0	0	0	0	#N/A	#N/A	#N/A	#N/A
hsa-miR-3927-5p	0	0	0	0	0	#N/A	#N/A	#N/A	#N/A
hsa-miR-3183	0	0	0	0	0	#N/A	#N/A	#N/A	#N/A
hsa-miR-4254	0	0	0	0	0	#N/A	#N/A	#N/A	#N/A
hsa-miR-320a-5p	0	0	0	0	0	#N/A	#N/A	#N/A	#N/A
hsa-miR-551b-3p	0	0	0	0	0	#N/A	#N/A	#N/A	#N/A
hsa-miR-375-5p	0	0	0	0	0	#N/A	#N/A	#N/A	#N/A
hsa-miR-4431	0	0	0	0	0	#N/A	#N/A	#N/A	#N/A
hsa-miR-611	0	0	0	0	0	#N/A	#N/A	#N/A	#N/A
hsa-miR-6825-3p	0	0	0	0	0	#N/A	#N/A	#N/A	#N/A
hsa-miR-10392-5p	0	0	0	0	0	#N/A	#N/A	#N/A	#N/A
hsa-miR-6125	0	0	0	0	0	#N/A	#N/A	#N/A	#N/A
hsa-miR-5739	0	0	0	0	0	#N/A	#N/A	#N/A	#N/A
hsa-miR-4285	0	0	0	0	0	#N/A	#N/A	#N/A	#N/A
hsa-miR-4508	0	0	0	0	0.0575182	6.19848	2.63191	0.342144	#N/A
hsa-miR-4787-5p	0	0	0	0	0	#N/A	#N/A	#N/A	#N/A
hsa-miR-598-5p	0	0	0	0	0	#N/A	#N/A	#N/A	#N/A
hsa-miR-6786-5p	0	0	0	0	0	#N/A	#N/A	#N/A	#N/A
hsa-miR-554	0	0	0	0	0	#N/A	#N/A	#N/A	#N/A
hsa-miR-4518	0	0	0	0	0	#N/A	#N/A	#N/A	#N/A
hsa-miR-4469	0	0	0	0	0	#N/A	#N/A	#N/A	#N/A
hsa-miR-3917	0	0	0	0	0	#N/A	#N/A	#N/A	#N/A
hsa-miR-301b-5p	0	0	0	0	0	#N/A	#N/A	#N/A	#N/A
hsa-miR-4539	0	0	0	0	0	#N/A	#N/A	#N/A	#N/A
hsa-miR-4526	0	0	0	0	0	#N/A	#N/A	#N/A	#N/A
hsa-miR-4502	0	0	0	0	0	#N/A	#N/A	#N/A	#N/A
hsa-miR-3130-3p	0	0	0	0	0	#N/A	#N/A	#N/A	#N/A
hsa-miR-4734	0	0	0	0	0	#N/A	#N/A	#N/A	#N/A
hsa-miR-612	0	0	0	0	0	#N/A	#N/A	#N/A	#N/A
hsa-miR-4486	0	0	0	0	0	#N/A	#N/A	#N/A	#N/A
hsa-miR-3663-5p	0	0	0	0	0	#N/A	#N/A	#N/A	#N/A
hsa-miR-4299	0	0	0	0	0	#N/A	#N/A	#N/A	#N/A
hsa-miR-3182	0	0	0	0	0	#N/A	#N/A	#N/A	#N/A
hsa-miR-3655	0	0	0	0	0	#N/A	#N/A	#N/A	#N/A
hsa-miR-1180-5p	0	0	0	0	0	#N/A	#N/A	#N/A	#N/A
hsa-miR-873-3p	0	0	0	0	0	#N/A	#N/A	#N/A	#N/A
hsa-miR-3928-3p	0	0	0	0	0	#N/A	#N/A	#N/A	#N/A
hsa-miR-6089	0	0	0	0	0	#N/A	#N/A	#N/A	#N/A
hsa-miR-3197	0	0	0	0	0	#N/A	#N/A	#N/A	#N/A
hsa-miR-1914-3p	0	0	0	0	0	#N/A	#N/A	#N/A	#N/A
hsa-miR-6086	0	0	0	0	0	#N/A	#N/A	#N/A	#N/A
hsa-miR-4481	0	0	0	0	0	#N/A	#N/A	#N/A	#N/A
hsa-miR-144-5p	0	0	0.338103	0	0	-14.9722	-3.90422	0.255343	#N/A
hsa-miR-4534	0	0	0	0	0	#N/A	#N/A	#N/A	#N/A
hsa-miR-8069	0	0	0	0	0	#N/A	#N/A	#N/A	#N/A
hsa-miR-4722-5p	0	0	0	0	0	#N/A	#N/A	#N/A	#N/A
hsa-miR-657	0	0	0	0	0	#N/A	#N/A	#N/A	#N/A
hsa-miR-4252	0	0	0	0	0	#N/A	#N/A	#N/A	#N/A
hsa-miR-3194-5p	0	0	0	0	0	#N/A	#N/A	#N/A	#N/A
hsa-miR-10396b-3p	0	0	0	0	0	#N/A	#N/A	#N/A	#N/A
hsa-miR-10396a-3p	0	0	0	0	0	#N/A	#N/A	#N/A	#N/A
hsa-miR-4312	0	0	0	0	0	#N/A	#N/A	#N/A	#N/A
hsa-miR-1273c	0	0	0	0	0	#N/A	#N/A	#N/A	#N/A
hsa-miR-4783-5p	0	0	0	0	0	#N/A	#N/A	#N/A	#N/A
hsa-miR-658	0	0	0	0	0	#N/A	#N/A	#N/A	#N/A
hsa-miR-8072	0	0	0	0	0	#N/A	#N/A	#N/A	#N/A
hsa-miR-10396a-5p	0	0	0	0	0	#N/A	#N/A	#N/A	#N/A
hsa-miR-187-5p	0	0	0	0	0	#N/A	#N/A	#N/A	#N/A
hsa-miR-621	0	0	0	0	0	#N/A	#N/A	#N/A	#N/A
hsa-miR-7158-5p	0	0	0	0	0	#N/A	#N/A	#N/A	#N/A
hsa-miR-6847-3p	0	0	0.59168	0	0	-24.9211	-4.63929	0.207629	#N/A
hsa-miR-4268	0	0	0	0	0	#N/A	#N/A	#N/A	#N/A
hsa-miR-8077	0	0	0	0	0	#N/A	#N/A	#N/A	#N/A
hsa-miR-5589-5p	0	0	0	0	0	#N/A	#N/A	#N/A	#N/A
hsa-miR-6131	0.0881664	0	0	0	0	-2.87431	-1.52322	0.611005	#N/A
hsa-miR-4327	0	0	0	0	0	#N/A	#N/A	#N/A	#N/A
hsa-miR-3160-5p	0	0	0	0	0	#N/A	#N/A	#N/A	#N/A
hsa-miR-6124	0	0	0	0	0	#N/A	#N/A	#N/A	#N/A
hsa-miR-6077	0	0	0	0	0	#N/A	#N/A	#N/A	#N/A
hsa-miR-3619-3p	0	0	0	0	0	#N/A	#N/A	#N/A	#N/A
hsa-miR-711	0	0	0	0	0	#N/A	#N/A	#N/A	#N/A
hsa-miR-6503-3p	0	0	0	0	0	#N/A	#N/A	#N/A	#N/A
hsa-miR-4516	0	0	0	0	0	#N/A	#N/A	#N/A	#N/A
hsa-miR-3689d	0	0	0	0	0	#N/A	#N/A	#N/A	#N/A
hsa-miR-4294	0	0	0	0	0	#N/A	#N/A	#N/A	#N/A
hsa-miR-504-3p	0	0	0	0	0	#N/A	#N/A	#N/A	#N/A
hsa-miR-3201	0	0	0	0	0	#N/A	#N/A	#N/A	#N/A
hsa-miR-4320	0	0	0	0	0	#N/A	#N/A	#N/A	#N/A
hsa-miR-6744-3p	0	0	0	0	0	#N/A	#N/A	#N/A	#N/A
hsa-miR-6069	0	0	0	0	0	#N/A	#N/A	#N/A	#N/A
hsa-miR-4284	0	0	0	0	0	#N/A	#N/A	#N/A	#N/A
hsa-miR-5787	0	0	0	0	0	#N/A	#N/A	#N/A	#N/A
hsa-miR-3153	0	0	0	0	0	#N/A	#N/A	#N/A	#N/A
hsa-miR-8059	0	0	0	0	0	#N/A	#N/A	#N/A	#N/A
hsa-miR-6090	0	0	0	0	0	#N/A	#N/A	#N/A	#N/A
hsa-miR-920	0	0	0	0	0	#N/A	#N/A	#N/A	#N/A
hsa-miR-6799-5p	0	0	0	0	0	#N/A	#N/A	#N/A	#N/A
hsa-miR-2861	0	0	0	0	0	#N/A	#N/A	#N/A	#N/A
hsa-miR-3178	0	0	0	0	0	#N/A	#N/A	#N/A	#N/A
hsa-miR-4492	0	0	0	0	0	#N/A	#N/A	#N/A	#N/A
hsa-miR-762	0	0	0.0422629	0	0	-2.87368	-1.5229	0.611087	#N/A
hsa-miR-4675	0	0	0	0	0	#N/A	#N/A	#N/A	#N/A
hsa-miR-4271	0	0	0	0	0	#N/A	#N/A	#N/A	#N/A
hsa-miR-128-2-5p	0	0	0	0	0	#N/A	#N/A	#N/A	#N/A
hsa-miR-4525	0	0	0	0	0	#N/A	#N/A	#N/A	#N/A
hsa-miR-6752-5p	0	0	0	0	0	#N/A	#N/A	#N/A	#N/A
hsa-miR-615-5p	0	0	0	0	0	#N/A	#N/A	#N/A	#N/A
hsa-miR-4483	0	0	0	0	0	#N/A	#N/A	#N/A	#N/A
hsa-miR-4281	0	0	0	0	0	#N/A	#N/A	#N/A	#N/A
hsa-miR-4710	0	0	0	0	0	#N/A	#N/A	#N/A	#N/A
hsa-miR-92a-2-5p	0	0	0	0	0	#N/A	#N/A	#N/A	#N/A
hsa-miR-5087	0	0	0	0	0	#N/A	#N/A	#N/A	#N/A
hsa-miR-6073	0	0	0	0	0	#N/A	#N/A	#N/A	#N/A
hsa-miR-3713	0	0	0	0	0	#N/A	#N/A	#N/A	#N/A
hsa-miR-198	0	0	0	0	0	#N/A	#N/A	#N/A	#N/A
hsa-miR-489-5p	0	0	0	0	0	#N/A	#N/A	#N/A	#N/A
hsa-miR-8078	0	0	0	0	0	#N/A	#N/A	#N/A	#N/A
hsa-miR-4316	0	0	0	0	0	#N/A	#N/A	#N/A	#N/A
hsa-miR-143-5p	0	0	0	0	0	#N/A	#N/A	#N/A	#N/A
hsa-miR-663b	0	0	0	0	0	#N/A	#N/A	#N/A	#N/A
hsa-miR-4769-5p	0	0	0	0	0	#N/A	#N/A	#N/A	#N/A
hsa-miR-3151-5p	0	0	0	0	0	#N/A	#N/A	#N/A	#N/A
hsa-miR-4447	0	0	0	0	0	#N/A	#N/A	#N/A	#N/A
hsa-miR-4472	0	0	0	0	0	#N/A	#N/A	#N/A	#N/A
hsa-miR-642b-5p	0	0	0	0	0	#N/A	#N/A	#N/A	#N/A
hsa-miR-3147	0	0	0	0	0	#N/A	#N/A	#N/A	#N/A
hsa-miR-6792-5p	0	0	0	0	0	#N/A	#N/A	#N/A	#N/A
hsa-miR-6892-5p	0	0	0	0	0	#N/A	#N/A	#N/A	#N/A
hsa-miR-4724-3p	0	0	0	0	0	#N/A	#N/A	#N/A	#N/A
hsa-miR-5682	0	0	0	0	0	#N/A	#N/A	#N/A	#N/A
hsa-miR-6824-5p	0	0	0	0	0	#N/A	#N/A	#N/A	#N/A
hsa-miR-6800-5p	0	0	0	0	0	#N/A	#N/A	#N/A	#N/A
hsa-miR-4789-5p	0	0	0	0	0	#N/A	#N/A	#N/A	#N/A
hsa-miR-4420	0	0	0	0	0	#N/A	#N/A	#N/A	#N/A
hsa-miR-4436b-5p	0	0	0	0	0	#N/A	#N/A	#N/A	#N/A
hsa-miR-145-5p	0.0881664	0.145343	0	0.124937	0.460146	3.85445	1.94652	0.411044	#N/A
hsa-miR-642a-5p	0	0	0	0	0	#N/A	#N/A	#N/A	#N/A
hsa-miR-670-5p	0	0	0	0	0	#N/A	#N/A	#N/A	#N/A
hsa-miR-572	0	0	0	0	0	#N/A	#N/A	#N/A	#N/A
hsa-miR-5571-3p	0	0	0	0	0	#N/A	#N/A	#N/A	#N/A
hsa-miR-4691-5p	0	0	0	0	0	#N/A	#N/A	#N/A	#N/A
hsa-miR-11181-5p	0	0	0	0	0	#N/A	#N/A	#N/A	#N/A
hsa-miR-6126	0	0	0	0	0	#N/A	#N/A	#N/A	#N/A
hsa-miR-183-3p	0	0	0.464892	0	0	-19.9371	-4.31738	0.231055	#N/A
hsa-miR-489-3p	0	0	0	0	0	#N/A	#N/A	#N/A	#N/A
hsa-miR-4439	0	0	0	0	0	#N/A	#N/A	#N/A	#N/A
hsa-miR-6864-3p	0	0	0	0	0	#N/A	#N/A	#N/A	#N/A
hsa-miR-6807-5p	0	0	0	0	0	#N/A	#N/A	#N/A	#N/A
hsa-miR-1224-5p	0	0	0	0	0	#N/A	#N/A	#N/A	#N/A
hsa-miR-6858-5p	0	0	0	0	0	#N/A	#N/A	#N/A	#N/A
hsa-miR-6765-5p	0	0	0	0	0	#N/A	#N/A	#N/A	#N/A
hsa-miR-6834-5p	0	0	0	0	0	#N/A	#N/A	#N/A	#N/A
hsa-miR-1226-5p	0	0	0	0	0	#N/A	#N/A	#N/A	#N/A
hsa-miR-6869-5p	0	0	0	0	0	#N/A	#N/A	#N/A	#N/A
hsa-miR-937-5p	0	0	0	0	0	#N/A	#N/A	#N/A	#N/A
hsa-miR-627-5p	0	0.387582	0	0	0	-16.5793	-4.05131	0.24107	#N/A
hsa-miR-1238-5p	0	0	0	0	0	#N/A	#N/A	#N/A	#N/A
hsa-miR-4758-5p	0	0	0	0	0	#N/A	#N/A	#N/A	#N/A
hsa-miR-4658	0	0	0	0	0	#N/A	#N/A	#N/A	#N/A
hsa-miR-6790-5p	0	0	0	0	0	#N/A	#N/A	#N/A	#N/A
hsa-miR-10395-5p	0	0	0	0	0	#N/A	#N/A	#N/A	#N/A
hsa-miR-548aw	0	0	0	0	0	#N/A	#N/A	#N/A	#N/A
hsa-miR-5011-3p	0	0	0	0	0	#N/A	#N/A	#N/A	#N/A
hsa-miR-4715-3p	0	0	0	0	0	#N/A	#N/A	#N/A	#N/A
hsa-miR-1202	0	0	0	0	0	#N/A	#N/A	#N/A	#N/A
hsa-miR-6821-5p	0	0	0	0	0	#N/A	#N/A	#N/A	#N/A
hsa-miR-3977	0	0	0	0	0	#N/A	#N/A	#N/A	#N/A
hsa-miR-3978	0	0	0	0	0	#N/A	#N/A	#N/A	#N/A
hsa-miR-4776-5p	0	0	0	0	0	#N/A	#N/A	#N/A	#N/A
hsa-miR-4535	0	0	0	0	0	#N/A	#N/A	#N/A	#N/A
hsa-miR-3198	0	0	0	0	0	#N/A	#N/A	#N/A	#N/A
hsa-miR-8057	0	0	0	0	0	#N/A	#N/A	#N/A	#N/A
hsa-miR-647	0	0	0	0	0	#N/A	#N/A	#N/A	#N/A
hsa-miR-5089-5p	0	0	0	0	0	#N/A	#N/A	#N/A	#N/A
hsa-miR-3620-5p	0	0	0	0	0	#N/A	#N/A	#N/A	#N/A
hsa-miR-1227-5p	0	0	0	0	0	#N/A	#N/A	#N/A	#N/A
hsa-miR-1275	0	0.775164	0	0	0	-31.8931	-4.99517	0.184233	#N/A
hsa-miR-1225-5p	0.0881664	0	0	0	0	-2.87431	-1.52322	0.611005	#N/A
hsa-miR-1229-5p	0	0	0	0	0	#N/A	#N/A	#N/A	#N/A
hsa-miR-6741-5p	0	0	0	0	0	#N/A	#N/A	#N/A	#N/A
hsa-miR-3940-5p	0	0	0	0	0	#N/A	#N/A	#N/A	#N/A
hsa-miR-6848-3p	0	0	0	0	0	#N/A	#N/A	#N/A	#N/A
hsa-miR-632	0	0	0	0	0	#N/A	#N/A	#N/A	#N/A
hsa-miR-1231	0	0	0	0	0	#N/A	#N/A	#N/A	#N/A
hsa-miR-511-5p	0	0	0	0	0	#N/A	#N/A	#N/A	#N/A
hsa-miR-6808-3p	0	0	0	0	0	#N/A	#N/A	#N/A	#N/A
hsa-miR-6833-5p	0	0	0	0	0	#N/A	#N/A	#N/A	#N/A
hsa-miR-7108-5p	0	0	0	0	0	#N/A	#N/A	#N/A	#N/A
hsa-miR-147a	0	0	0	0	0.0575182	6.19848	2.63191	0.342144	#N/A
hsa-miR-2053	0	0	0	0	0	#N/A	#N/A	#N/A	#N/A
hsa-miR-4273	0	0	0	0	0	#N/A	#N/A	#N/A	#N/A
hsa-miR-653-5p	0	0	0	0	0	#N/A	#N/A	#N/A	#N/A
hsa-miR-2909	0	0	0	0	0	#N/A	#N/A	#N/A	#N/A
hsa-miR-607	0	0	0	0	0	#N/A	#N/A	#N/A	#N/A
hsa-miR-3692-3p	0	0	0	0	0	#N/A	#N/A	#N/A	#N/A
hsa-miR-3074-5p	0	0	0	0.812091	0	67.1519	6.06936	0.0787236	#N/A
hsa-miR-4652-3p	0	0	0	0	0	#N/A	#N/A	#N/A	#N/A
hsa-miR-3122	0	0	0	0	0	#N/A	#N/A	#N/A	#N/A
hsa-miR-5572	0	0	0	0	0	#N/A	#N/A	#N/A	#N/A
hsa-miR-599	0	0	0	0	0	#N/A	#N/A	#N/A	#N/A
hsa-miR-552-5p	0	0	0	0	0	#N/A	#N/A	#N/A	#N/A
hsa-miR-557	0	0	0	0	0	#N/A	#N/A	#N/A	#N/A
hsa-miR-7850-5p	0	0	0	0	0	#N/A	#N/A	#N/A	#N/A
hsa-miR-2681-5p	0	0	0	0	0	#N/A	#N/A	#N/A	#N/A
hsa-miR-548x-3p	0	0	0	0	0	#N/A	#N/A	#N/A	#N/A
hsa-miR-548aj-3p	0	0	0	0	0	#N/A	#N/A	#N/A	#N/A
hsa-miR-548as-3p	0	0	0	0	0	#N/A	#N/A	#N/A	#N/A
hsa-miR-548ar-3p	0	0	0.633943	0	0	-26.5852	-4.73255	0.201147	#N/A
hsa-miR-4282	0	0	0	0	0	#N/A	#N/A	#N/A	#N/A
hsa-miR-3133	0	0	0	0	0	#N/A	#N/A	#N/A	#N/A
hsa-miR-7161-5p	0	0	0	0	0	#N/A	#N/A	#N/A	#N/A
hsa-miR-559	0	0	0	0	0	#N/A	#N/A	#N/A	#N/A
hsa-miR-4796-3p	0	0	0	0	0	#N/A	#N/A	#N/A	#N/A
hsa-miR-3121-3p	0	0	0.676206	0	0	-28.2505	-4.8202	0.194761	#N/A
hsa-miR-605-5p	0	0	0.59168	0	0	-24.9211	-4.63929	0.20782	#N/A
hsa-miR-513c-3p	0	0	0	0	0	#N/A	#N/A	#N/A	#N/A
hsa-miR-513a-3p	0	0	0	0	0	#N/A	#N/A	#N/A	#N/A
hsa-miR-5688	0	0	0	0	0	#N/A	#N/A	#N/A	#N/A
hsa-miR-4803	0	0	0	0	0	#N/A	#N/A	#N/A	#N/A
hsa-miR-6732-3p	0	0	0	0	0	#N/A	#N/A	#N/A	#N/A
hsa-miR-3912-3p	0	0	0.845258	0	0	-34.9201	-5.12598	0.170852	#N/A
hsa-miR-12120	0	0	0	0	0	#N/A	#N/A	#N/A	#N/A
hsa-miR-6891-5p	0	0	0	0	0	#N/A	#N/A	#N/A	#N/A
hsa-miR-506-3p	0	0	0	0	0	#N/A	#N/A	#N/A	#N/A
hsa-miR-124-3p	0	0	0.211314	0	0	-10.0427	-3.32808	0.307427	#N/A
hsa-miR-3936	0	0	0	0	0	#N/A	#N/A	#N/A	#N/A
hsa-miR-18b-5p	0	0	0.0422629	0	0	-2.87368	-1.5229	0.611087	#N/A
hsa-miR-302e	0	0	0	0	0	#N/A	#N/A	#N/A	#N/A
hsa-miR-302c-3p	0	0	0	0	0	#N/A	#N/A	#N/A	#N/A
hsa-miR-302d-3p	0	0	0	0	0	#N/A	#N/A	#N/A	#N/A
hsa-miR-302b-3p	0	0	0	0	0	#N/A	#N/A	#N/A	#N/A
hsa-miR-302a-3p	0	0	0	0	0	#N/A	#N/A	#N/A	#N/A
hsa-miR-200c-3p	0	0	0.0422629	0	0	-2.87368	-1.5229	0.611087	#N/A
hsa-miR-580-5p	0	0	0	0	0	#N/A	#N/A	#N/A	#N/A
hsa-miR-5700	0	0	0	0	0	#N/A	#N/A	#N/A	#N/A
hsa-miR-302f	0	0	0	0	0	#N/A	#N/A	#N/A	#N/A
hsa-miR-6882-5p	0	0	0	0	0	#N/A	#N/A	#N/A	#N/A
[truncated: 633 more rows]

## Sheet: Sheet1
Name	HBMEC-flow-1	HBMEC-flow-2	HBMEC-flow-3	HBMEC-flow-40-1	HBMEC-flow-40-2	Fold change	Log fold change	P-value	FDR p-value
hsa-miR-34c-3p	1.21438	6.69306	7.68194	170.398	557.597	459.749	8.8447	2.35091e-20	4.72768e-17
hsa-miR-127-3p	24576.2	137156	138433	135732	49876.7	-145.897	-7.1888	5.86287e-13	5.89512e-10
hsa-miR-369-5p	1521.52	17064.9	15542.1	17097.5	6648.6	-157.845	-7.30236	1.35629e-12	8.23616e-10
hsa-miR-3529-5p	466.534	5459.09	4936.51	4334.52	1966.84	-141.383	-7.14346	2.04778e-12	8.23616e-10
hsa-miR-541-3p	131.523	287.356	318.409	288.706	143.599	-71.8891	-6.1677	1.82453e-12	8.23616e-10
hsa-miR-376a-3p	71.8862	1250.93	1696.22	1734.85	760.813	-137.495	-7.10324	4.49941e-12	1.50805e-09
hsa-miR-411-5p	896.716	15723.8	17214.5	19660	7969.86	-162.252	-7.34209	6.45792e-12	1.85527e-09
hsa-miR-555	10.6654	5.42882	6.50613	9.23308	219.991	67.6773	6.0806	8.94391e-12	2.0385e-09
hsa-miR-431-5p	152.247	690.427	748.519	680.974	297.423	-88.8941	-6.47402	9.12306e-12	2.0385e-09
hsa-miR-197-3p	186.645	316.359	390.838	519.326	205.083	-65.5993	-6.03561	2.69663e-11	5.42292e-09
hsa-miR-154-3p	9.47746	52.0572	56.8307	51.1264	31.1907	-109.288	-6.772	4.98565e-11	9.11467e-09
hsa-miR-485-3p	65.3655	169.334	177.39	174.739	67.5317	-58.0051	-5.85811	5.76933e-11	9.66844e-09
hsa-miR-337-3p	333.902	2898.91	3029.82	5989.24	1734.06	-89.067	-6.47682	8.20171e-11	1.26874e-08
hsa-miR-196b-3p	1.13518	2.30539	2.35161	0.551228	11.7203	34.7125	5.11738	1.08114e-10	1.44945e-08
hsa-miR-4641	1.08238	4.53641	7.44678	2.96285	67.4922	132.321	7.0479	1.0272e-10	1.44945e-08
hsa-miR-323b-3p	33.6859	255.526	279.842	193.481	80.6554	-114.026	-6.83322	1.58514e-10	1.99232e-08
hsa-miR-432-5p	242.137	606.689	400.794	417.693	211.061	-55.4173	-5.79227	1.79661e-10	2.12528e-08
hsa-miR-379-3p	41.9226	633.015	575.44	797.559	316.66	-82.2127	-6.36129	2.27297e-10	2.53941e-08
hsa-miR-889-3p	7.41829	310.93	476.437	254.047	117.042	-112.353	-6.81189	3.15374e-10	3.33799e-08
hsa-miR-1226-3p	11.0614	28.4083	12.4636	29.9041	10.0244	-68.3938	-6.09579	4.00134e-10	3.83176e-08
hsa-miR-485-5p	236.303	406.343	587.825	980.773	329.869	-51.2143	-5.67848	3.89176e-10	3.83176e-08
hsa-miR-323a-3p	44.8794	410.434	413.179	619.925	239.307	-63.078	-5.97907	5.64321e-10	5.15841e-08
hsa-miR-409-3p	320.703	1125.85	888.675	1072.62	453.744	-46.6285	-5.54314	9.66313e-10	8.44894e-08
hsa-miR-455-3p	61.7487	486.809	469.617	626.816	215.942	-49.1193	-5.61822	1.06441e-09	8.91888e-08
hsa-miR-514a-3p	1.18798	3.8671	0.940646	5.37448	16.3316	27.9433	4.80443	1.32067e-09	1.06235e-07
hsa-miR-187-3p	2.48156	4.16457	3.60581	3.37627	28.1867	40.1287	5.32656	1.50193e-09	1.16169e-07
hsa-miR-668-3p	2.42876	29.3751	19.8319	32.7981	9.28162	-113.294	-6.82393	2.07278e-09	1.54384e-07
hsa-miR-1180-3p	214.127	407.905	444.063	581.959	224.001	-41.2895	-5.3677	2.36985e-09	1.70206e-07
hsa-miR-6742-3p	111.882	146.281	145.408	44.7184	53.4646	-32.9031	-5.04015	3.16219e-09	2.15484e-07
hsa-miR-625-5p	40.7874	166.062	246.763	37.6902	38.3951	-85.747	-6.42201	3.21458e-09	2.15484e-07
hsa-miR-300	14.8894	225.184	320.212	312.133	142.462	-67.1334	-6.06896	4.43253e-09	2.87543e-07
hsa-miR-382-5p	237.095	739.212	629.919	495.623	308.965	-42.3929	-5.40575	4.7553e-09	2.98841e-07
hsa-miR-4793-3p	2.85116	6.46996	8.46581	3.30737	64.7906	37.7843	5.23971	5.26274e-09	3.20708e-07
hsa-miR-487b-3p	57.1552	923.42	1085.35	739.06	311.411	-51.8337	-5.69582	1.60508e-08	9.4936e-07
hsa-miR-2392	225.638	300.965	219.17	199.062	157.364	-32.5573	-5.02491	2.04486e-08	1.1158e-06
hsa-miR-1910-3p	0.0263996	1.04114	2.27323	0.137807	22.4908	47.4654	5.56881	2.10842e-08	1.1158e-06
hsa-miR-7845-5p	3.45835	2.90033	4.23291	4.20312	110.354	43.8006	5.45288	1.98305e-08	1.1158e-06
hsa-miR-1307-3p	90.1019	391.99	287.367	323.089	156.824	-28.0848	-4.81172	2.09197e-08	1.1158e-06
hsa-miR-6873-5p	10.639	5.80065	6.66291	14.263	166.004	31.3551	4.97063	2.40741e-08	1.23257e-06
hsa-miR-1185-5p	6.20391	105.23	116.797	83.7867	40.5315	-61.8764	-5.95132	2.45166e-08	1.23257e-06
hsa-miR-191-3p	8.34228	32.9447	43.6616	57.121	24.8967	-28.2088	-4.81807	5.22875e-08	2.56464e-06
hsa-miR-1249-5p	3.72235	0.818041	0.235161	0.344518	9.24875	26.1859	4.71072	6.28459e-08	3.00912e-06
hsa-miR-335-5p	0.131998	2.37976	4.78162	0.275614	34.2046	64.8534	6.01911	7.05391e-08	3.29893e-06
hsa-miR-6769a-5p	4.03914	4.09021	8.38743	3.44518	77.5988	30.5328	4.93229	8.14049e-08	3.72058e-06
hsa-miR-204-5p	576.251	3408.85	3764.54	24.5986	379.008	-36.2989	-5.18185	1.11577e-07	4.98624e-06
hsa-miR-299-5p	1.74237	14.576	25.1623	14.6765	7.34576	-90.991	-6.50765	1.50217e-07	6.56709e-06
hsa-miR-4786-5p	13.0678	7.80857	5.64387	5.58119	6.01136	-34.8087	-5.12138	1.59203e-07	6.81187e-06
hsa-miR-493-3p	35.6923	124.491	151.679	1814.23	589.439	-27.3273	-4.77227	2.38025e-07	9.97224e-06
hsa-miR-138-5p	23.2317	26.1773	34.6471	2753.52	960.565	18.0454	4.17356	2.72146e-07	1.11691e-05
hsa-miR-199a-3p	263.996	2443.19	2829.62	16932.5	5985.88	-36.4892	-5.1894	3.83776e-07	1.54355e-05
hsa-miR-2467-3p	9.34547	2.67723	1.41097	2.34272	61.4217	31.5273	4.97853	4.44445e-07	1.75251e-05
hsa-miR-370-3p	27.4028	223.176	422.036	344.035	144.693	-39.0441	-5.28703	6.68955e-07	2.58706e-05
hsa-miR-345-5p	35.0851	316.879	303.829	263.487	141.357	-25.1318	-4.65144	7.00503e-07	2.65795e-05
hsa-miR-3612	0.871187	0.0743674	0.156774	0.275614	3.56606	37.15	5.21529	8.05098e-07	2.94373e-05
hsa-miR-6792-5p	21.9909	17.8482	26.5732	25.5632	432.479	18.4307	4.20404	7.99065e-07	2.94373e-05
hsa-miR-590-3p	2.24397	93.926	203.493	118.859	63.6534	-49.7842	-5.63762	9.13447e-07	3.28025e-05
hsa-miR-6068	16.051	2.90033	3.84097	0.206711	48.4294	20.6841	4.37045	1.35169e-06	4.76885e-05
hsa-miR-150-5p	2.19117	22.9795	50.4813	4.34092	308.594	29.5463	4.8849	1.42093e-06	4.92669e-05
hsa-miR-654-3p	78.1165	491.42	557.489	619.856	260.474	-23.2058	-4.53641	1.62482e-06	5.53816e-05
hsa-miR-4325	2.58716	10.4858	3.91936	13.4362	53.1458	19.1943	4.2626	1.69629e-06	5.6854e-05
hsa-miR-935	15.8926	34.5065	48.1297	1.79149	6.58653	-20.9217	-4.38693	1.81188e-06	5.97327e-05
hsa-miR-576-5p	13.8862	77.937	73.2136	104.044	41.9941	-18.856	-4.23696	2.18301e-06	7.08069e-05
hsa-miR-6846-3p	9.02867	4.46204	1.95968	5.7879	21.7678	13.645	3.7703	2.23151e-06	7.12311e-05
hsa-miR-137-3p	13.939	111.03	168.846	61.8065	30.9574	-28.8144	-4.84872	2.32412e-06	7.30282e-05
hsa-miR-337-5p	34.0555	276.424	726.492	253.427	158.363	-26.5246	-4.72926	2.47272e-06	7.65021e-05
hsa-miR-376c-3p	57.6568	1010.28	1278.1	1451.25	573.015	-29.0287	-4.85941	5.10368e-06	0.000155508
hsa-miR-340-3p	19.0869	82.8452	51.8923	156.687	296.151	17.1808	4.10272	5.72838e-06	0.000171937
hsa-miR-6821-3p	1.58398	2.00792	4.38968	1.37807	7.34247	10.0713	3.33218	6.60415e-06	0.000195308
hsa-miR-6759-5p	80.73	109.989	134.434	259.491	150.951	-15.498	-3.95401	6.93645e-06	0.000202162
hsa-miR-5188	9.97906	13.6836	15.7558	2.96285	3.82242	-15.0009	-3.90698	7.09283e-06	0.000203767
hsa-miR-4725-5p	5.41192	8.92408	9.87678	11.3002	55.8705	14.0656	3.8141	7.33353e-06	0.000207714
hsa-miR-5004-5p	0.263996	0.0743674	1.25419	0.137807	4.72298	32.8729	5.03882	8.6371e-06	0.000241239
hsa-miR-625-3p	6.52071	37.4812	86.853	19.3619	12.0063	-25.9714	-4.69885	1.1152e-05	0.000307216
hsa-miR-5687	6.20391	4.16457	6.03581	3.16956	2.02789	-16.6835	-4.06035	1.14197e-05	0.000310338
hsa-miR-12135	36.3787	158.402	148.779	267.69	120.76	-17.5022	-4.12947	1.17537e-05	0.000315155
hsa-miR-493-5p	8.63268	70.2772	90.6939	662.508	201.001	-14.234	-3.83127	1.4195e-05	0.000375608
hsa-miR-941	51.6905	214.178	200.749	211.052	83.5214	-16.1923	-4.01724	1.51577e-05	0.000395871
hsa-miR-6835-3p	2.40237	6.17249	3.84097	5.02996	12.1213	10.3289	3.36861	1.60799e-05	0.000414573
hsa-miR-4705	0.0527992	0.0743674	0.235161	2.27382	1.50202	56.2346	5.81339	1.63298e-05	0.000415686
hsa-miR-630	4.32954	7.95731	11.131	17.4326	5.88647	-20.8832	-4.38427	1.8446e-05	0.000463686
hsa-miR-147b-3p	1.97997	1.63608	2.27323	3.65189	8.15428	15.3828	3.94324	1.88017e-05	0.000466794
hsa-miR-652-3p	87.2243	494.246	561.801	596.016	1759.27	17.5444	4.13294	2.2665e-05	0.000555845
hsa-miR-6826-3p	5.83432	3.27216	2.19484	13.9185	9.70889	9.00215	3.17027	2.36126e-05	0.000572107
hsa-miR-149-5p	312.519	1709.04	1705.63	5869.21	2078.04	-16.1889	-4.01693	2.47395e-05	0.000592276
hsa-miR-633	2.79836	0.743674	2.27323	3.23847	5.02535	15.386	3.94355	2.53603e-05	0.000599994
hsa-miR-122b-3p	2.90396	33.2422	74.3894	37.897	28.0651	-15.1219	-3.91857	2.82501e-05	0.000660592
hsa-miR-4750-3p	4.59353	3.12343	7.83872	3.10066	14.0999	8.23912	3.04249	2.8999e-05	0.00067031
hsa-miR-521	3.11516	0.892408	0.235161	18.1216	8.80505	18.0673	4.17531	3.02353e-05	0.000683183
hsa-miR-3909	1.39918	12.2706	9.32807	16.8814	31.5555	14.3102	3.83897	2.9904e-05	0.000683183
hsa-miR-6869-3p	16.3414	21.046	20.459	45.6831	23.4736	-10.0643	-3.33117	3.76146e-05	0.000840478
hsa-miR-660-5p	15.0742	129.027	148.23	46.9922	33.7478	-16.8787	-4.07713	4.18807e-05	0.000912741
hsa-miR-6727-5p	5.75512	11.0064	15.3639	10.5422	6.46164	-12.9647	-3.69652	4.2165e-05	0.000912741
hsa-miR-7855-5p	157.923	674.661	665.664	432.439	364.146	-14.1503	-3.82276	4.22103e-05	0.000912741
hsa-miR-6747-5p	1169.37	1929.39	787.556	2043.82	878.474	-13.7457	-3.78091	4.30463e-05	0.000920916
hsa-miR-409-5p	8.79107	24.5412	14.1097	11.2313	6.8659	-13.5938	-3.76488	4.84658e-05	0.00102594
hsa-miR-412-5p	3.80155	35.3989	47.4242	80.3415	32.2293	-14.9265	-3.8998	5.26442e-05	0.00109142
hsa-miR-380-5p	6.01911	10.4114	6.89807	8.33733	6.37618	-17.4179	-4.1225	5.23992e-05	0.00109142
hsa-miR-3689a-5p	11.6422	0.223102	4.86	1.9982	1.88656	-29.375	-4.87652	5.6592e-05	0.00116129
hsa-miR-433-3p	35.4547	46.1821	31.6684	30.5243	19.9469	-13.5334	-3.75846	5.87132e-05	0.00119265
hsa-miR-3173-5p	5.06873	7.5111	9.64162	7.44158	3.91445	-14.1128	-3.81893	5.96687e-05	0.00119994
hsa-miR-5690	1.53118	1.41298	6.66291	7.64829	10.6883	10.8438	3.4388	6.03262e-05	0.00120115
hsa-miR-217-5p	1.92717	7.13927	11.8365	0.206711	2.0016	-23.1344	-4.53197	6.22022e-05	0.00122636
hsa-miR-183-3p	9.05507	1.48735	2.74355	1.03355	2.94816	-24.3552	-4.60616	6.76236e-05	0.0013203
hsa-miR-887-3p	25.6604	59.3452	66.5507	9.50869	14.3431	-11.9748	-3.58193	7.41832e-05	0.00143445
hsa-miR-1251-5p	2.48156	6.09812	8.38743	9.23308	17.62	9.70036	3.27804	7.90624e-05	0.00151423
hsa-miR-628-3p	8.10468	31.6805	23.9865	18.5351	10.3991	-10.2901	-3.36318	8.05193e-05	0.00152759
hsa-miR-12136	42.3978	114.972	56.5955	50.4374	44.0548	-10.3158	-3.36678	8.41682e-05	0.00158189
hsa-miR-609	6.25671	1.26425	10.1903	5.58119	35.3056	10.6664	3.415	8.52565e-05	0.00158751
hsa-miR-3145-3p	5.46472	2.15665	2.82194	2.27382	1.84712	-23.6115	-4.56142	0.000102298	0.00188735
hsa-miR-136-5p	4.32954	39.1172	85.9123	55.3296	26.2672	-13.8571	-3.79255	0.000110557	0.00202119
hsa-miR-543	23.3637	85.3737	68.04	114.035	40.7583	-12.6573	-3.6619	0.000120845	0.00217784
hsa-miR-3615	13.3582	53.5445	57.5362	12.2648	14.4286	-9.40903	-3.23405	0.000121292	0.00217784
hsa-miR-4632-3p	1.08238	2.08229	1.33258	20.3265	13.081	11.8521	3.56707	0.000128709	0.00229057
hsa-miR-3189-5p	23.8125	27.1441	43.5833	5.719	9.59714	-8.65635	-3.11376	0.000142208	0.0025086
hsa-miR-200a-5p	28.4324	4.09021	9.64162	68.1456	30.4052	-11.7267	-3.55173	0.000145964	0.00255247
hsa-miR-7852-3p	7.60309	3.71837	1.72452	2.06711	6.90863	7.55246	2.91695	0.000179859	0.00311807
hsa-miR-16-2-3p	5.14793	8.47788	5.09516	2.20491	15.4409	6.453	2.68997	0.000219348	0.00377016
hsa-miR-376a-5p	1.37278	3.12343	6.81968	6.54584	1.91943	-82.1023	-6.35935	0.000254419	0.00433591
hsa-miR-495-3p	5.93991	81.9528	120.324	52.4356	25.3798	-11.4846	-3.52162	0.000258159	0.00436266
hsa-miR-561-3p	8.31588	1.71045	0.391936	2.68724	10.5536	11.2611	3.49328	0.00026308	0.00437234
hsa-miR-505-3p	20.0109	61.5018	76.8978	18.7418	18.3759	-11.0041	-3.45997	0.000261113	0.00437234
hsa-miR-3115	22.4661	11.3038	4.62484	5.09886	6.10996	-9.99508	-3.32122	0.000272316	0.00448875
hsa-miR-369-3p	5.09513	96.0083	152.463	81.7196	32.5448	-15.7155	-3.97412	0.00027868	0.00455046
hsa-miR-487a-5p	87.9371	141.447	137.491	141.941	75.0023	-8.08946	-3.01604	0.000280585	0.00455046
hsa-miR-4485-3p	11.6422	7.88294	5.09516	8.61294	20.177	6.73652	2.752	0.000307551	0.00494789
hsa-miR-4511	5.54392	23.6488	8.30904	5.719	3.3097	-11.0883	-3.47097	0.000318775	0.00504768
hsa-miR-548aw	3.48475	2.90033	3.29226	2.68724	1.89642	-17.6541	-4.14193	0.000317331	0.00504768
hsa-miR-200c-5p	0.871187	1.48735	2.43	0.482325	3.30641	10.1427	3.34237	0.000327066	0.00509868
hsa-miR-4775	5.20072	44.0255	100.963	55.2607	24.877	-10.985	-3.45746	0.000325362	0.00509868
hsa-miR-146a-5p	14.2558	137.208	340.357	39.2061	753.645	12.8548	3.68424	0.00033974	0.00521539
hsa-miR-134-5p	18.1629	156.171	80.8955	93.0198	49.5042	-13.2106	-3.72362	0.000338681	0.00521539
hsa-miR-3127-3p	15.919	22.1615	38.3313	3.99641	7.51338	-8.54842	-3.09566	0.000358084	0.00541666
hsa-miR-3126-5p	6.01911	3.79274	7.60355	10.3355	32.7486	7.55228	2.91691	0.000358238	0.00541666
hsa-miR-34b-3p	2.48156	2.52849	6.66291	63.8736	19.7892	7.54633	2.91578	0.000378658	0.00568269
hsa-miR-5010-3p	25.5812	38.7454	47.2675	24.0473	14.33	-8.06181	-3.0111	0.000382616	0.00569956
hsa-miR-656-3p	2.13837	27.1441	55.1062	10.8179	8.0261	-14.4176	-3.84976	0.000403826	0.00592769
hsa-miR-504-3p	5.17433	2.37976	1.48936	0.482325	2.42229	-20.6109	-4.36534	0.000403585	0.00592769
hsa-miR-548av-5p	5.46472	58.2296	74.4678	42.7202	20.7456	-11.106	-3.47327	0.000421667	0.00614473
hsa-miR-514a-5p	25.7396	19.2611	39.8991	36.2433	159.122	8.5375	3.09381	0.000472614	0.0068376
hsa-miR-4788	5.99271	3.12343	0.940646	4.75435	2.6425	-18.759	-4.22951	0.000476161	0.00683972
hsa-miR-380-3p	2.95676	14.0554	16.0694	5.02996	5.3836	-11.3881	-3.50945	0.000492827	0.00702891
hsa-miR-8053	4.96313	4.46204	1.17581	0.206711	1.39684	-16.2403	-4.0215	0.000497491	0.00704545
hsa-miR-4512	0.395994	3.04906	2.19484	4.13421	6.66212	11.6642	3.54401	0.000548452	0.00771284
hsa-miR-4282	21.0405	104.858	75.4084	132.226	62.5162	-10.7348	-3.42423	0.000638972	0.00876535
hsa-miR-6778-3p	2.93036	6.17249	2.03807	10.3355	9.40651	6.10212	2.60931	0.000629396	0.00876535
hsa-miR-6722-5p	1.92717	0	1.33258	0.206711	3.64494	12.5268	3.64695	0.000633421	0.00876535
hsa-miR-377-3p	2.40237	65.8895	136.55	18.5351	19.4211	-10.3632	-3.3734	0.000640729	0.00876535
hsa-miR-216a-5p	9.00227	18.4431	32.3739	2.61834	9.97182	-9.67043	-3.27358	0.000654292	0.00889042
hsa-miR-325	37.2763	24.5412	23.9865	39.6884	95.7282	7.82718	2.96849	0.000689818	0.00931022
hsa-miR-3127-5p	0.158398	0.594939	0.627097	1.9982	1.66635	17.1753	4.10226	0.000710079	0.00951979
hsa-miR-4522	22.2813	32.4242	48.0513	45.8898	130.676	7.55351	2.91715	0.000722271	0.00961912
hsa-miR-3177-3p	11.0086	6.99053	21.6349	36.3122	69.2112	9.37906	3.22944	0.000737884	0.0097624
hsa-miR-4760-3p	7.39189	8.18041	4.70323	1.58478	2.26124	-9.59191	-3.26182	0.000763119	0.0100303
hsa-miR-652-5p	2.95676	1.63608	0.627097	2.34272	5.5578	9.27885	3.21395	0.000821719	0.0105637
hsa-miR-539-5p	49.2089	48.2644	37.7042	54.0204	28.6895	-7.34528	-2.87682	0.00083522	0.0105637
hsa-miR-323b-5p	31.2043	91.5462	105.431	56.9832	51.9002	-7.70472	-2.94574	0.000825696	0.0105637
hsa-miR-3713	6.8639	3.1978	1.95968	1.9982	2.35327	-10.3654	-3.3737	0.000831143	0.0105637
hsa-miR-934	5.01593	0.371837	4.62484	2.20491	1.80111	-18.2517	-4.18996	0.000817705	0.0105637
hsa-miR-328-3p	52.4296	161.377	149.328	237.442	342.276	8.06336	3.01138	0.000826638	0.0105637
hsa-miR-1304-3p	15.3118	61.6505	94.8485	40.3775	22.7439	-8.86015	-3.14733	0.000850121	0.010685
hsa-miR-1827	33.2635	109.915	43.1129	104.94	192.262	7.21721	2.85144	0.000943724	0.0117878
hsa-miR-301a-5p	7.0487	5.05698	11.7581	8.26843	19.26	6.84303	2.77463	0.00105591	0.0129478
hsa-miR-1206	21.5421	4.53641	3.76258	3.51408	6.91191	-10.2482	-3.3573	0.00105366	0.0129478
hsa-miR-6853-3p	118.323	7.21363	6.1142	6.33913	22.2903	-12.95	-3.69488	0.00105069	0.0129478
hsa-miR-3186-3p	0.422394	0.594939	5.95742	9.23308	10.8198	10.3555	3.37232	0.00108094	0.0131743
hsa-miR-676-5p	1.02959	6.46996	1.56774	1.72259	1.07146	-36.5768	-5.19286	0.00109701	0.0132897
hsa-miR-1227-3p	15.3646	9.96523	27.122	28.9395	12.9003	-7.22667	-2.85333	0.00116531	0.0140326
hsa-miR-511-5p	7.47109	7.58547	5.56549	6.20132	9.74504	4.74607	2.24673	0.00119132	0.0142604
hsa-miR-454-5p	7.0487	11.3038	16.1478	2.20491	5.52164	-6.14748	-2.62	0.00121274	0.0144309
hsa-miR-3146	0.950386	1.18988	0.391936	0.137807	2.68851	9.71641	3.28042	0.00134236	0.0158793
hsa-miR-3120-5p	473.424	878.279	392.093	3013.7	1147.68	-7.42396	-2.89219	0.00135534	0.0159391
hsa-miR-6131	827.813	893.97	1348.81	2016.39	907.962	-7.49211	-2.90537	0.00137044	0.016023
hsa-miR-6768-5p	64.2831	33.9115	15.7558	17.7082	20.1376	-6.97134	-2.80144	0.00168115	0.0194298
hsa-miR-6784-5p	36.9331	137.431	82.8552	23.3583	31.8546	-7.05073	-2.81777	0.00167396	0.0194298
hsa-miR-758-3p	47.7305	45.3641	31.1981	27.0791	22.7998	-6.81999	-2.76977	0.0016941	0.0194676
hsa-miR-323a-5p	48.8921	73.6981	33.3929	80.9617	44.9619	-5.7917	-2.53399	0.00176438	0.02016
hsa-miR-939-3p	8.10468	3.94147	6.34936	2.68724	18.1327	6.0727	2.60234	0.00178561	0.0202874
hsa-miR-7844-5p	4.69913	7.65984	3.52742	2.34272	2.84628	-9.98264	-3.31942	0.00183679	0.0207515
hsa-miR-149-3p	4.32954	3.49527	2.90032	2.41162	7.03352	5.15562	2.36615	0.00190381	0.0212698
hsa-miR-4444	17.3973	9.66776	7.9171	1.8604	4.815	-5.36284	-2.423	0.00190206	0.0212698
hsa-miR-4718	29.99	399.353	183.034	146.42	88.5632	-8.16599	-3.02963	0.00206266	0.0229171
hsa-miR-329-3p	50.0273	95.7852	90.7723	38.3104	33.5834	-6.77383	-2.75997	0.00208203	0.0229267
hsa-miR-12113	3.48475	3.27216	4.23291	6.68365	7.67771	6.42774	2.68431	0.00208632	0.0229267
hsa-miR-1249-3p	4.30314	7.0649	6.34936	8.95746	10.2118	5.34243	2.4175	0.00223793	0.0244591
hsa-miR-199a-5p	4.88393	26.4748	27.9058	1284.5	515.491	-7.5486	-2.91621	0.00231776	0.0250132
hsa-miR-3183	2.63996	4.75951	2.03807	10.8179	6.96779	6.50638	2.70185	0.00231791	0.0250132
hsa-miR-6861-5p	9.74146	2.23102	12.2284	2.27382	2.77068	-6.65006	-2.73337	0.00232594	0.0250132
hsa-miR-6838-3p	20.4597	6.8418	8.77936	5.65009	4.69997	-5.97222	-2.57827	0.00250767	0.0267751
hsa-miR-5689	9.63586	10.4858	3.60581	4.96106	3.83557	-6.31546	-2.65889	0.00251641	0.0267751
hsa-miR-1915-5p	2.85116	11.2295	10.6607	9.85321	14.2741	5.13526	2.36044	0.00255882	0.0269413
hsa-miR-130b-5p	39.9162	185.398	192.205	403.775	139.55	-7.24349	-2.85668	0.00255801	0.0269413
hsa-miR-1277-5p	3.32635	1.93355	0.156774	2.75614	1.42971	-39.2864	-5.29596	0.00263927	0.0276436
hsa-miR-5589-3p	2.00637	1.56171	0.235161	0.689036	2.97774	8.00868	3.00156	0.00269669	0.0280987
hsa-miR-629-5p	12.9886	12.7168	9.09291	10.0599	7.86505	-4.88712	-2.28899	0.00277553	0.0287711
hsa-miR-6731-3p	1.13518	0.520572	3.21387	0.895746	4.76899	8.41493	3.07295	0.00280361	0.0289131
hsa-miR-4525	4.59353	3.71837	7.99549	3.03176	2.11334	-8.12566	-3.02248	0.00284423	0.0291824
hsa-miR-4675	25.9508	15.6915	9.48485	11.2313	9.51826	-5.56851	-2.47729	0.00296445	0.0302615
hsa-miR-10396a-5p	30.386	39.4891	62.9449	95.707	115.182	5.49934	2.45926	0.00300967	0.030568
hsa-miR-138-1-3p	2.85116	0.223102	4.86	33.6938	20.8935	7.6203	2.92985	0.00305469	0.0308693
hsa-miR-3667-5p	13.3582	7.65984	21.9484	7.16597	56.1728	6.58013	2.71812	0.00310824	0.0312534
hsa-miR-340-5p	3.06236	6.69306	35.5878	27.5614	44.5314	7.2134	2.85068	0.00327972	0.0328135
hsa-miR-6834-3p	6.30951	4.53641	7.44678	5.44338	3.0862	-6.96623	-2.80038	0.00337105	0.0335603
hsa-miR-6746-5p	14.599	6.6187	2.74355	9.78431	7.5824	-6.78825	-2.76304	0.00343208	0.0339995
hsa-miR-151a-3p	24.2612	244.074	383.313	123.958	503.153	7.46276	2.89971	0.00348905	0.0343945
hsa-miR-4286	180.969	39.9353	39.8991	48.2325	149.692	-6.19279	-2.63059	0.00358109	0.0351296
hsa-miR-553	4.30314	4.53641	10.9742	10.6801	15.7597	4.71728	2.23796	0.00365394	0.0353273
hsa-miR-542-5p	10.0583	71.0952	72.0378	280.644	97.7298	-5.51035	-2.46214	0.00363189	0.0353273
hsa-miR-6748-5p	15.0214	5.20572	4.93839	17.6393	27.7627	5.14641	2.36357	0.00364297	0.0353273
hsa-miR-302a-3p	6.38871	7.65984	3.21387	2.68724	5.71884	-7.60331	-2.92663	0.0036913	0.0355177
hsa-miR-4655-3p	22.9413	14.7991	17.01	17.5015	13.4853	-4.91387	-2.29686	0.00381323	0.0365163
hsa-miR-6804-3p	3.64315	1.04114	2.90032	0.344518	1.95229	-11.5438	-3.52905	0.00403301	0.0384379
hsa-miR-6807-5p	3.53755	16.2865	5.01678	3.58299	10.1559	6.37592	2.67263	0.00409771	0.0388702
hsa-let-7d-3p	48.9977	151.709	155.912	549.781	319.44	6.03073	2.59233	0.00412112	0.0389088
hsa-miR-3662	5.64952	3.27216	8.07388	1.9293	8.16743	4.89669	2.29181	0.00433893	0.0405841
hsa-miR-183-5p	8.31588	20.0048	22.262	11.1624	50.5165	5.97714	2.57946	0.00432369	0.0405841
hsa-miR-198	2.00637	1.63608	1.33258	0.895746	1.27195	-22.0957	-4.4657	0.00436186	0.0406098
hsa-miR-6776-3p	4.46154	1.41298	2.97871	4.54763	5.78786	5.51783	2.4641	0.00440442	0.0408169
hsa-miR-6826-5p	3.35275	0	6.34936	0.0689036	1.12405	-14.9553	-3.90258	0.00460486	0.0422848
hsa-miR-25-5p	6.7319	8.40351	6.27097	27.4925	20.4432	4.23064	2.08087	0.00460461	0.0422848
hsa-miR-5707	1.13518	2.67723	3.84097	4.75435	1.09118	-16.4271	-4.038	0.00466353	0.0426289
hsa-miR-9903	2.74556	4.09021	0.627097	0.96465	3.44445	6.35764	2.66849	0.0049787	0.0453039
hsa-miR-495-5p	17.7141	80.2424	66.6291	65.2517	37.8988	-5.85588	-2.54989	0.00501208	0.0454023
hsa-miR-3651	8.81747	12.4937	14.8936	32.867	16.4598	-6.7324	-2.75112	0.00518857	0.0467902
hsa-miR-3613-5p	38.5434	144.793	121.735	307.654	148.68	-7.40943	-2.88936	0.00523983	0.0470415
hsa-miR-7151-3p	1.42558	0	1.8029	1.8604	2.4946	8.6377	3.11065	0.0053095	0.0474552
hsa-miR-223-3p	0.422394	4.16457	4.46807	0.275614	0.992581	-18.4882	-4.20854	0.00567789	0.0505232
hsa-miR-106a-5p	77.6413	444.271	475.967	677.529	999.411	6.28727	2.65243	0.00571603	0.0506385
hsa-miR-6818-3p	5.46472	0.297469	6.34936	3.03176	8.29232	6.04357	2.5954	0.00580138	0.0511692
hsa-miR-12132	6.8111	5.87502	5.01678	1.51588	2.83313	-6.44043	-2.68716	0.00586816	0.0515322
hsa-miR-4484	5.33272	5.05698	8.70097	0.344518	1.92271	-6.10195	-2.60927	0.00602658	0.0526932
hsa-miR-6757-5p	8.34228	9.37029	6.42775	4.68544	5.44276	-6.68339	-2.74058	0.00626582	0.0540797
hsa-miR-6886-5p	5.12153	0.446204	6.1142	15.1588	15.1878	5.79193	2.53404	0.00622034	0.0540797
hsa-miR-143-3p	5.41192	6.46996	13.169	12301.5	3130.27	5.01296	2.32566	0.00625908	0.0540797
hsa-miR-1199-3p	5.96631	1.78482	1.95968	3.30737	6.76073	6.09857	2.60847	0.00640827	0.0550728
hsa-miR-3924	3.22075	4.53641	2.82194	0.0689036	2.76411	-7.78548	-2.96079	0.00709931	0.0607519
hsa-miR-877-3p	8.97587	8.40351	8.85775	19.982	18.251	4.50995	2.17311	0.00717582	0.0608885
hsa-miR-6791-3p	10.3487	8.10604	5.25194	17.2948	16.9725	5.07756	2.34413	0.00717218	0.0608885
hsa-miR-10394-3p	3.80155	10.6345	14.1097	5.58119	5.79115	-5.98627	-2.58166	0.00721169	0.0609357
hsa-miR-6499-3p	46.4897	327.588	319.663	169.434	90.6995	-5.46867	-2.45119	0.00726594	0.0611373
hsa-miR-4667-3p	13.8862	5.87502	10.9742	20.2576	21.7217	4.22803	2.07999	0.00734961	0.0615836
hsa-miR-4716-5p	3.06236	9.22155	16.0694	14.6076	6.61611	-6.59076	-2.72045	0.00745379	0.0621974
hsa-miR-99a-3p	207.184	329.819	190.873	289.464	356.156	5.14891	2.36427	0.00748625	0.0622101
hsa-miR-5089-5p	11.3518	6.02376	8.93614	22.4626	26.6222	4.74227	2.24558	0.0075455	0.0624444
hsa-miR-1302	0.211197	0.223102	0.313549	0.206711	1.84712	12.8413	3.68272	0.00764871	0.0630391
hsa-miR-3913-3p	2.45516	2.90033	0.235161	0.137807	0.986008	-15.8321	-3.98478	0.00771914	0.06336
hsa-miR-205-5p	2.03277	18.1456	1.88129	2.48053	2.52089	-8.09912	-3.01777	0.00795064	0.0649949
hsa-miR-2110	26.4788	29.5238	26.4165	37.5524	19.0365	-4.23695	-2.08303	0.00814951	0.0663509
hsa-miR-520g-5p	8.71187	5.05698	2.27323	9.85321	12.4303	4.18434	2.065	0.00828166	0.0668852
hsa-miR-597-3p	4.75193	7.65984	3.13549	2.27382	3.04676	-6.5335	-2.70786	0.00827106	0.0668852
hsa-miR-4708-3p	11.4574	11.8988	10.0336	6.13242	5.52822	-4.87647	-2.28584	0.00840043	0.0673039
hsa-miR-6886-3p	7.99908	0.892408	4.46807	0.551228	2.53404	-7.11981	-2.83184	0.00838365	0.0673039
hsa-miR-365a-3p	38.9658	115.195	281.488	308.964	292.325	5.62907	2.4929	0.00858907	0.0682712
hsa-miR-152-5p	16.9222	9.44466	15.1287	1.51588	6.42548	-4.24256	-2.08493	0.0085874	0.0682712
hsa-miR-1287-5p	10.0847	24.7643	24.6136	33.9006	20.3972	-4.0117	-2.00421	0.00876864	0.0694242
hsa-miR-2682-5p	4.61993	11.4526	7.44678	5.16777	4.07878	-5.06717	-2.34118	0.00887953	0.0697529
hsa-miR-6771-5p	4.27674	5.65192	1.88129	1.8604	2.50117	-7.02263	-2.81201	0.00885441	0.0697529
hsa-miR-7159-3p	11.2198	11.6757	5.25194	6.13242	4.55535	-4.67885	-2.22616	0.00925648	0.072431
hsa-miR-6883-3p	7.57669	10.114	5.33033	0.344518	4.58494	-4.87536	-2.28551	0.00954368	0.074389
hsa-miR-891a-5p	11.0614	15.5428	4.23291	3.16956	3.96046	-4.5432	-2.18371	0.00963132	0.0747822
hsa-miR-142-3p	40.8666	52.429	12.5419	18.0527	20.338	-6.02656	-2.59133	0.00985936	0.0762583
hsa-miR-147b-5p	5.27992	10.7089	7.9171	1.8604	14.0079	3.86407	1.95012	0.0100337	0.0773094
hsa-miR-3609	12.487	11.6757	4.07613	0.757939	4.38773	-5.09153	-2.3481	0.0102823	0.0789227
hsa-miR-4432	0.211197	17.2532	8.93614	3.99641	2.97117	-9.045	-3.17712	0.0104548	0.0799411
hsa-miR-4726-3p	1.55758	3.4209	3.13549	2.82505	1.57761	-10.0396	-3.32764	0.0104945	0.0799412
hsa-miR-1245b-3p	1.26718	8.10604	0.940646	6.61474	3.27026	-10.2799	-3.36175	0.0105487	0.0800507
hsa-miR-362-5p	9.47746	32.2754	34.8039	15.9167	10.8987	-4.13388	-2.0475	0.0106154	0.0802542
hsa-miR-494-3p	0.158398	36.2913	40.6045	15.5033	10.3399	-8.83076	-3.14254	0.0108043	0.0813759
hsa-miR-4649-3p	6.8639	9.66776	8.15226	13.2984	21.6429	3.53517	1.82178	0.0109244	0.081974
hsa-miR-3158-3p	15.0742	10.5602	22.5755	43.4781	18.1524	-4.17052	-2.06023	0.0110778	0.0826847
hsa-miR-3074-3p	1.66318	1.48735	4.70323	0.275614	1.09118	-9.91725	-3.30994	0.0111014	0.0826847
hsa-miR-1296-3p	3.11516	0.148735	3.91936	5.09886	3.99333	-11.0696	-3.46853	0.0111626	0.082834
hsa-miR-370-5p	18.5061	14.1298	10.8174	13.2984	11.4443	-4.41202	-2.14144	0.0112814	0.083102
hsa-miR-4732-5p	16.5526	9.96523	9.56323	14.0563	8.82805	-3.49104	-1.80366	0.011256	0.083102
hsa-miR-196a-1-3p	1.87437	2.15665	1.33258	1.17136	1.77481	-11.9961	-3.5845	0.011341	0.0832361
hsa-miR-3920	8.21028	9.96523	4.54645	3.58299	2.46502	-6.09384	-2.60735	0.0116414	0.0851305
hsa-miR-330-3p	19.5357	25.3593	20.6158	101.564	60.6625	4.67854	2.22606	0.0117367	0.0854266
hsa-miR-4287	12.3286	18.5175	24.7703	26.7346	27.0725	5.06962	2.34188	0.0117802	0.0854266
hsa-miR-4265	3.40555	19.4843	21.3997	21.429	10.7343	-5.24192	-2.3901	0.0118093	0.0854266
hsa-miR-4315	19.3773	1.48735	7.13323	14.5387	8.08526	-4.99479	-2.32042	0.0118802	0.085631
hsa-miR-3151-3p	9.87346	63.5097	26.3381	60.4973	22.4054	-4.95005	-2.30744	0.0120497	0.0865428
hsa-miR-3675-3p	0.0527992	0.966776	0.156774	2.06711	1.23251	11.2981	3.49801	0.0127417	0.0911872
hsa-miR-3654	7.86709	2.37976	3.29226	0.689036	6.41891	4.07884	2.02816	0.0128145	0.091253
hsa-miR-136-3p	2.08557	12.4937	14.6584	14.3319	5.62353	-5.58644	-2.48193	0.0128417	0.091253
hsa-miR-3195	27.1388	26.4748	40.291	14.6765	20.3085	-4.10736	-2.03821	0.0129663	0.091814
hsa-miR-6505-5p	9.55666	6.8418	11.8365	5.51228	32.3148	4.24271	2.08498	0.0133351	0.0940946
hsa-miR-103a-1-5p	68.4278	2.23102	14.5016	17.0881	14.731	-5.83597	-2.54497	0.013558	0.0953329
hsa-miR-6895-3p	4.46154	8.40351	0.470323	2.96285	8.19044	5.17971	2.37287	0.0138794	0.0972523
hsa-miR-448	13.7806	11.9731	5.40871	0.826843	4.54878	-4.31811	-2.1104	0.0140279	0.0979517
hsa-miR-4427	1.50478	6.32123	6.50613	3.58299	1.97859	-8.29137	-3.05161	0.0140787	0.0979663
hsa-miR-7109-3p	91.3691	31.4574	19.5968	13.3673	20.6963	-5.23409	-2.38794	0.0141837	0.0980189
hsa-miR-6750-5p	20.6181	15.8402	7.29001	11.9892	32.6237	4.46661	2.15918	0.0141792	0.0980189
hsa-miR-6772-5p	24.974	4.75951	2.35161	3.16956	8.21344	-5.52305	-2.46546	0.0143364	0.0987349
hsa-miR-34a-3p	8.39508	7.0649	9.95517	9.92211	5.82073	-3.56993	-1.8359	0.0144722	0.0989923
hsa-miR-4740-3p	6.46791	1.48735	3.0571	9.30198	9.03183	3.78909	1.92185	0.0144723	0.0989923
hsa-miR-431-3p	23.6013	8.25478	19.9887	2.48053	6.93163	-3.93143	-1.97505	0.0145446	0.0991498
hsa-miR-135a-5p	7.99908	6.99053	14.3448	4.82325	34.599	4.03293	2.01183	0.0150934	0.102198
hsa-miR-145-3p	22.5981	9.96523	9.64162	28.1127	20.2099	-4.3152	-2.10943	0.0150602	0.102198
hsa-miR-1277-3p	6.46791	3.644	15.2071	12.2648	5.87332	-4.95166	-2.30791	0.0154336	0.103956
hsa-miR-96-3p	5.20072	2.37976	4.23291	0.137807	1.73537	-5.23908	-2.38931	0.0154564	0.103956
hsa-miR-1470	10.3223	4.98261	6.74129	10.8179	15.3521	3.81076	1.93008	0.015817	0.106027
hsa-miR-708-3p	12.1174	6.17249	4.31129	1.9982	2.66879	-5.53241	-2.46791	0.0164955	0.110208
hsa-miR-3675-5p	1.53118	0.297469	0.391936	0.413421	2.02132	6.65144	2.73367	0.0165654	0.110308
hsa-miR-3605-3p	36.2203	34.6552	50.8733	103.7	35.4174	-5.23589	-2.38843	0.0166442	0.110467
hsa-miR-1-5p	5.80792	1.41298	4.38968	4.06531	2.05418	-6.71826	-2.74809	0.017168	0.113569
hsa-miR-10399-5p	2.00637	4.75951	1.72452	0.137807	2.95474	5.19691	2.37765	0.0178798	0.117704
hsa-miR-3606-5p	8.21028	6.54433	1.56774	2.89395	3.03362	-5.67407	-2.50438	0.0179103	0.117704
hsa-miR-6803-3p	7.89349	8.40351	7.99549	24.4608	15.6545	3.34486	1.74195	0.0182303	0.119169
hsa-miR-3928-5p	5.99271	6.54433	5.33033	5.16777	2.39929	-4.80614	-2.26488	0.0183109	0.119169
hsa-miR-3190-3p	21.0669	32.4985	8.23065	7.57939	10.1296	-3.97454	-1.99079	0.018273	0.119169
hsa-miR-5091	2.58716	4.31331	3.21387	4.82325	1.78467	-6.86571	-2.77941	0.0184827	0.119899
hsa-miR-6798-3p	7.78789	4.68514	13.9529	5.92571	5.37703	-5.01786	-2.32707	0.0188744	0.122046
hsa-miR-1292-3p	9.60946	2.52849	1.17581	7.64829	16.0851	4.157	2.05554	0.0189847	0.122366
hsa-miR-4786-3p	4.59353	8.99845	6.97646	0.206711	9.9291	4.02441	2.00878	0.0191361	0.122948
hsa-miR-6515-5p	2.61356	3.94147	2.50839	2.75614	4.90046	4.04253	2.01526	0.0193876	0.124167
hsa-miR-224-5p	1.90077	34.5065	32.2955	15.4344	11.5199	-4.68249	-2.22728	0.0197129	0.12585
hsa-miR-30a-5p	360.487	4862.14	6366.13	5081.98	7223.48	5.22751	2.38612	0.0203029	0.129206
hsa-miR-10392-5p	6.9695	4.90825	5.17355	7.30378	3.829	-4.5796	-2.19522	0.0207214	0.131454
hsa-miR-3152-5p	33.6859	76.0035	104.177	12.7472	23.0759	-4.05151	-2.01846	0.0207993	0.131532
hsa-miR-1255a	9.87346	11.9731	6.74129	7.02816	6.95135	-4.01575	-2.00567	0.0212986	0.134164
hsa-miR-6715b-3p	10.6126	6.39559	4.62484	2.96285	3.86515	-4.36367	-2.12554	0.0213488	0.134164
hsa-miR-548as-3p	9.18707	3.27216	8.70097	5.23667	3.57263	-3.52219	-1.81647	0.0216918	0.135842
hsa-miR-508-5p	5.75512	1.33861	0.391936	5.8568	8.35477	4.68292	2.22741	0.0217509	0.135842
hsa-miR-4530	3.93354	3.12343	4.54645	5.30557	3.54305	-4.68523	-2.22812	0.0219745	0.136813
hsa-miR-338-5p	0.633591	6.8418	0	0.137807	4.42717	6.1746	2.62635	0.0220986	0.137063
hsa-miR-3912-5p	4.93673	2.82596	2.03807	2.68724	2.54719	-5.71779	-2.51546	0.0221508	0.137063
hsa-miR-6788-3p	2.85116	0.297469	3.6842	2.27382	2.56033	4.88501	2.28836	0.0224368	0.138406
hsa-miR-6890-5p	2.50796	1.26425	2.03807	0.0689036	1.65649	-7.77312	-2.95849	0.0225995	0.138983
hsa-miR-190a-5p	7.41829	4.83388	3.6842	7.99281	8.10827	3.46684	1.79362	0.0226889	0.139108
hsa-miR-6800-5p	1.61038	0.669306	2.43	1.72259	3.56935	5.20607	2.38019	0.0228501	0.13967
hsa-miR-6890-3p	7.2071	16.4352	20.7726	11.9203	19.753	3.49547	1.80548	0.0230691	0.140582
hsa-miR-483-5p	4.88393	9.07282	15.4423	19.9131	10.0573	-4.81363	-2.26713	0.0232517	0.141257
hsa-miR-4779	6.5999	3.04906	0.391936	2.41162	6.68513	4.13617	2.0483	0.0233204	0.141257
hsa-miR-6821-5p	8.68547	2.82596	2.19484	2.96285	7.22086	3.93636	1.97686	0.0234059	0.141349
hsa-miR-1910-5p	9.00227	16.9558	18.1074	0.826843	6.89877	-3.63691	-1.86271	0.0236809	0.142582
hsa-miR-3140-5p	6.25671	1.41298	5.09516	2.89395	2.24481	-5.23734	-2.38883	0.0244259	0.146628
hsa-miR-3611	22.7037	7.288	6.34936	0.275614	7.3359	-4.42216	-2.14475	0.0245295	0.146812
hsa-miR-3194-5p	5.06873	0.223102	0.470323	3.30737	6.08695	5.74439	2.52215	0.0247838	0.147894
hsa-miR-6509-5p	36.9067	19.7074	6.74129	0.757939	8.45666	-4.31234	-2.10847	0.0254375	0.151345
hsa-miR-598-3p	2.19117	16.0634	16.3829	4.34092	5.63339	-5.92089	-2.56581	0.0257669	0.152853
hsa-miR-1183	11.8006	4.90825	3.91936	7.92391	5.32444	-4.51398	-2.1744	0.0259476	0.153472
hsa-miR-498-3p	0.184797	1.71045	1.48936	0.344518	4.43375	6.2293	2.63907	0.0262903	0.155043
hsa-miR-140-3p	1.39918	8.84972	0.470323	7.57939	10.4188	5.00552	2.32352	0.0265321	0.156012
hsa-miR-548m	4.46154	4.98261	7.76033	8.13062	2.99746	-4.28652	-2.09981	0.0269935	0.157802
hsa-miR-4437	21.1461	5.80065	9.40646	9.92211	5.50521	-3.77422	-1.91618	0.0269559	0.157802
hsa-miR-554	13.807	10.8576	6.81968	2.06711	13.0942	3.25192	1.70129	0.0271603	0.158317
hsa-miR-3925-5p	14.6782	17.6251	27.8274	33.556	31.2433	-3.42745	-1.77714	0.0272979	0.158659
hsa-miR-10a-3p	10.7182	25.508	28.3761	54.7094	43.1937	4.00606	2.00218	0.0278348	0.161314
hsa-miR-3184-3p	4.27674	5.42882	1.88129	0.895746	1.8767	-4.78004	-2.25702	0.0280343	0.161754
hsa-miR-640	8.97587	5.87502	1.72452	2.48053	7.10911	3.65261	1.86893	0.0280717	0.161754
hsa-miR-6126	2.61356	2.60286	0.235161	8.40623	7.52981	4.55674	2.188	0.0282406	0.162263
hsa-miR-4774-3p	6.12471	3.644	8.30904	5.58119	7.54296	3.30599	1.72508	0.0283788	0.162592
hsa-miR-7706	4.75193	2.60286	6.50613	6.20132	3.01718	-4.47031	-2.16038	0.0285629	0.163182
hsa-miR-3917	2.87756	9.29592	8.70097	79.7903	27.2335	5.00912	2.32456	0.0292724	0.166761
hsa-miR-10524-5p	5.12153	6.8418	6.58452	1.8604	2.50775	-3.48334	-1.80047	0.0295041	0.167607
hsa-miR-4277	7.2071	4.46204	8.70097	7.37268	5.2357	-4.56363	-2.19018	0.0297877	0.168741
hsa-miR-501-3p	4.32954	9.74213	6.03581	4.61654	9.87651	3.26049	1.70509	0.0299841	0.168902
hsa-miR-1238-5p	4.30314	0.223102	2.19484	3.51408	4.80843	4.35561	2.12287	0.0299813	0.168902
hsa-miR-6785-3p	4.01274	5.35445	4.07613	1.58478	1.97202	-4.14551	-2.05155	0.0302627	0.169995
hsa-miR-4258	6.41511	3.4209	14.2665	11.7825	7.67771	-4.05015	-2.01798	0.0308734	0.172943
hsa-miR-6796-3p	7.0223	7.36237	4.23291	4.13421	2.45845	-3.96447	-1.98713	0.0312114	0.174351
hsa-miR-1843	4.93673	16.5839	13.4042	19.8442	14.3464	3.39713	1.76432	0.0313648	0.174722
hsa-miR-4504	2.71916	1.33861	0.313549	1.9293	0.966287	-8.01772	-3.00319	0.0315427	0.175047
hsa-miR-675-3p	6.54711	3.49527	1.09742	1.10246	6.4945	4.32017	2.11109	0.0315972	0.175047
hsa-miR-455-5p	4.72553	68.1949	49.9326	68.559	31.5555	-4.32826	-2.11379	0.0317686	0.175513
hsa-miR-6871-3p	1.05598	0.371837	1.09742	1.8604	1.84712	5.8001	2.53608	0.0323621	0.1762
hsa-miR-181a-2-3p	11.7742	93.331	123.617	1633.91	381.651	-4.45059	-2.154	0.0323455	0.1762
hsa-miR-3189-3p	8.44788	15.394	10.8174	2.82505	4.85444	-3.78365	-1.91978	0.0324188	0.1762
hsa-miR-4721	1.13518	0	0.156774	11.9203	4.11165	8.89912	3.15366	0.0321411	0.1762
hsa-miR-616-3p	2.93036	2.52849	1.48936	1.9982	3.14536	3.97338	1.99037	0.0323147	0.1762
hsa-miR-7847-3p	8.31588	7.0649	4.70323	9.23308	8.01953	3.03328	1.60088	0.0322203	0.1762
hsa-miR-4520-2-3p	20.5389	3.71837	10.8958	2.27382	5.19955	-4.36282	-2.12526	0.0325211	0.17628
hsa-miR-2115-5p	5.12153	3.04906	6.34936	1.72259	5.66297	3.02381	1.59637	0.0326118	0.176296
hsa-miR-376a-2-5p	0.818388	1.41298	0.235161	1.17136	1.68607	5.83616	2.54502	0.0328495	0.177106
hsa-miR-1469	53.9872	4.38767	3.21387	5.99461	13.2059	-5.06953	-2.34185	0.0329881	0.177377
hsa-miR-664a-3p	3.93354	28.5571	28.3761	34.7274	23.5952	3.40283	1.76673	0.0334571	0.178522
hsa-miR-338-3p	4.69913	0.892408	0.0783872	1.72259	3.61536	5.10426	2.3517	0.0334673	0.178522
hsa-miR-3166	3.51115	3.4209	0	0.137807	1.48558	-7.57479	-2.92121	0.0334126	0.178522
hsa-miR-450a-5p	9.50386	58.6759	90.6939	213.532	148.884	4.32835	2.11382	0.0335835	0.178668
hsa-miR-518d-5p	6.38871	7.73421	13.6394	6.54584	13.6069	2.98422	1.57736	0.0336853	0.178737
hsa-miR-6784-3p	3.08876	2.75159	4.70323	3.9275	5.4822	3.89015	1.95983	0.0342572	0.180817
hsa-miR-5681b	22.1493	2.75159	9.01452	0.275614	5.63996	-3.84604	-1.94337	0.0342529	0.180817
hsa-miR-589-5p	3.22075	7.0649	8.77936	5.65009	4.90046	-4.00447	-2.00161	0.034567	0.1815
hsa-miR-1295a	7.89349	2.52849	3.13549	4.20312	2.46502	-4.77636	-2.25591	0.0344877	0.1815
hsa-miR-541-5p	45.6977	166.657	23.9865	10.6801	29.8497	-4.26793	-2.09354	0.0346761	0.181598
hsa-miR-10398-3p	26.294	25.2849	25.3974	34.7963	53.1261	3.47368	1.79646	0.0352623	0.184188
hsa-miR-7978	73.3909	32.9447	27.6707	20.74	23.0594	-3.6607	-1.87212	0.0360384	0.187755
hsa-miR-6881-5p	119.933	51.6853	29.6303	18.6729	46.4377	-3.53498	-1.8217	0.0364803	0.189566
hsa-miR-7705	20.8029	19.1124	16.2261	11.9203	11.2273	-3.14752	-1.65422	0.037225	0.192937
hsa-miR-4772-3p	3.85434	1.33861	1.48936	0.344518	3.64165	3.90382	1.96489	0.0376037	0.194399
hsa-miR-4638-5p	7.0223	5.05698	6.42775	3.10066	4.20039	-3.59235	-1.84493	0.0377628	0.19472
hsa-miR-570-3p	2.40237	16.807	6.50613	2.27382	15.9076	4.14227	2.05042	0.0380144	0.195018
hsa-miR-3181	22.0173	37.7786	24.3	50.5063	22.8031	-2.95294	-1.56215	0.037948	0.195018
hsa-miR-5588-3p	4.17114	4.01584	6.03581	6.68365	3.54634	-3.71162	-1.89205	0.0385695	0.196363
hsa-miR-6773-3p	19.2981	118.616	96.8865	468.2	226.979	3.62871	1.85945	0.0383975	0.196363
hsa-miR-6752-5p	1.90077	3.71837	2.27323	5.23667	3.99662	3.66585	1.87415	0.0385529	0.196363
hsa-miR-8075	3.95994	4.16457	10.0336	4.89215	2.866	-4.28765	-2.10019	0.039739	0.201806
hsa-miR-451a	39.2826	454.087	1468.82	265.141	829.643	-4.50812	-2.17253	0.0400077	0.202149
hsa-miR-4727-3p	6.6263	75.8547	4.78162	5.37448	9.2619	-4.07792	-2.02783	0.0399625	0.202149
hsa-miR-6082	19.3245	5.42882	8.38743	3.7897	5.14696	-3.58279	-1.84108	0.0402272	0.202242
hsa-miR-578	13.3582	30.565	62.4746	3.99641	10.9513	-3.2335	-1.6931	0.0402239	0.202242
hsa-miR-4751	8.87027	16.1377	1.09742	4.54763	4.03277	-4.32011	-2.11107	0.040421	0.20271
hsa-miR-193a-3p	61.4583	315.243	445.866	1265.97	475.463	-3.54032	-1.82388	0.0414719	0.207463
hsa-miR-1468-3p	2.48156	4.75951	3.99774	6.33913	2.29082	-4.53612	-2.18146	0.0426169	0.212135
hsa-miR-6793-5p	20.7237	4.31331	6.89807	5.92571	10.0901	-3.4348	-1.78023	0.0426162	0.212135
hsa-miR-6165	530.949	300.221	338.476	445.875	696.098	3.88214	1.95685	0.0436706	0.216843
hsa-miR-101-3p	0.818388	9.22155	6.66291	4.68544	7.75331	3.74701	1.90574	0.0451643	0.223708
hsa-miR-10526-3p	8.36868	5.65192	4.46807	0.482325	3.0632	-3.06772	-1.61717	0.0453423	0.224038
hsa-miR-4662a-5p	0.633591	7.43674	10.0336	8.19952	8.8412	4.59091	2.19878	0.0455053	0.224054
hsa-miR-507	19.0605	11.3782	4.31129	36.5878	13.0942	-3.25151	-1.70111	0.0455685	0.224054
hsa-miR-4422	18.0045	17.0301	32.0603	45.3385	39.6178	3.79419	1.92379	0.0465205	0.226322
hsa-miR-6510-5p	7.2335	10.4858	14.6584	7.30378	48.1402	2.66537	1.41434	0.0466596	0.226322
hsa-miR-6760-3p	10.6918	5.13135	9.72001	12.6094	10.8888	2.94509	1.55831	0.0463833	0.226322
hsa-miR-4469	11.167	5.65192	11.131	15.9856	15.2207	2.93415	1.55294	0.0467049	0.226322
hsa-miR-6515-3p	1.16158	3.71837	3.52742	1.8604	2.21194	-5.65569	-2.4997	0.0466494	0.226322
hsa-miR-604	38.121	2.75159	12.0716	14.1252	10.8362	-3.93611	-1.97677	0.0466239	0.226322
hsa-miR-7151-5p	14.071	6.24686	6.1142	0.551228	3.89144	-3.65166	-1.86855	0.0470886	0.227087
hsa-miR-661	9.82066	3.04906	9.01452	3.44518	13.6726	2.92502	1.54845	0.04698	0.227087
hsa-miR-4790-3p	17.3182	12.0475	7.99549	2.54943	5.17983	-3.26123	-1.70542	0.0472069	0.227113
hsa-miR-7846-3p	5.33272	1.11551	7.60355	5.58119	2.60306	-4.63343	-2.21208	0.0474063	0.227528
hsa-miR-642b-5p	4.43514	3.4209	4.78162	2.96285	4.95633	3.03004	1.59934	0.0478256	0.228993
hsa-miR-942-5p	14.7574	27.6647	43.1913	56.5009	23.7299	-3.26866	-1.7087	0.0486805	0.231982
hsa-miR-425-3p	10.2431	30.6394	15.0503	44.5806	32.8768	3.06802	1.61731	0.0486081	0.231982
hsa-miR-3919	7.31269	4.46204	5.4871	1.79149	7.67443	2.81502	1.49314	0.0492427	0.234107
hsa-miR-6808-5p	2.03277	7.95731	22.1836	11.2313	15.5296	3.43037	1.77836	0.0497139	0.234133
hsa-miR-4714-3p	2.69276	3.8671	1.72452	3.51408	2.68851	-5.22684	-2.38594	0.049526	0.234133
hsa-miR-3191-5p	74.4997	59.6426	17.6371	34.2451	30.4643	-3.43064	-1.77848	0.0496316	0.234133
hsa-miR-297	28.1684	7.88294	17.01	11.3002	38.0533	3.85367	1.94623	0.0496781	0.234133
hsa-miR-5680	3.08876	0.966776	1.48936	3.23847	2.54061	3.52992	1.81964	0.0504281	0.235839
hsa-miR-4324	22.3605	48.0413	95.3972	123.2	99.2285	3.63936	1.86369	0.0503648	0.235839
hsa-miR-20a-3p	0.131998	0.148735	1.88129	4.61654	2.30397	6.26224	2.64668	0.0502103	0.235839
hsa-miR-4450	100.292	59.9401	39.7423	72.8311	51.6208	-3.25761	-1.70381	0.0506152	0.236165
hsa-miR-4479	11.035	2.75159	10.5823	4.89215	4.33186	-3.60307	-1.84923	0.0512455	0.238552
hsa-miR-3128	2.77196	0.0743674	4.78162	3.65189	1.27524	-5.8265	-2.54263	0.051403	0.238733
hsa-miR-6790-3p	16.975	12.6425	17.1668	32.178	11.4114	-2.92299	-1.54744	0.05158	0.239003
hsa-miR-6868-5p	1.31998	3.04906	3.6842	3.58299	4.16753	3.50916	1.81113	0.052383	0.242166
hsa-miR-645	12.3814	5.35445	2.50839	0.0689036	3.59235	-3.22521	-1.68939	0.0529423	0.24419
hsa-miR-6783-5p	16.051	18.22	31.9036	74.278	49.7967	3.3874	1.76018	0.0535423	0.24583
hsa-miR-2052	0.211197	5.28008	4.54645	0.137807	1.05503	-6.59804	-2.72204	0.0534755	0.24583
hsa-miR-4643	20.0109	6.6187	3.84097	7.92391	13.9586	3.04229	1.60516	0.054005	0.24739
hsa-miR-211-3p	1.08238	10.932	0.235161	5.65009	1.8274	-6.27114	-2.64873	0.0543286	0.248306
hsa-miR-4758-3p	12.3286	5.50319	4.70323	2.13601	4.38445	-3.57695	-1.83873	0.0548849	0.25028
hsa-miR-500a-5p	9.53026	17.3276	25.3974	3.16956	6.55038	-2.84358	-1.50771	0.055407	0.250564
hsa-miR-3155a	45.8561	348.114	389.506	445.599	458.592	3.54352	1.82518	0.0554456	0.250564
hsa-miR-4777-5p	3.61675	2.75159	3.21387	4.61654	6.56681	3.0226	1.59579	0.0551413	0.250564
hsa-miR-1305	21.7797	7.88294	14.58	8.54404	11.865	-3.21139	-1.6832	0.0554044	0.250564
hsa-miR-329-5p	3.03596	4.31331	1.72452	2.34272	2.22838	-4.36496	-2.12597	0.0557065	0.251179
hsa-miR-1287-3p	1.97997	0.223102	5.4871	2.68724	4.27927	3.8405	1.94129	0.0560519	0.252171
hsa-miR-766-3p	14.3614	24.4669	56.2036	22.6004	12.7359	-2.97683	-1.57378	0.0574525	0.257895
hsa-miR-5196-3p	2.58716	7.288	1.8029	2.27382	5.22584	3.58406	1.8416	0.0578285	0.259005
hsa-miR-221-5p	1.34638	20.451	25.8678	32.7981	12.7294	-3.38714	-1.76007	0.0581164	0.259716
hsa-miR-10a-5p	493.488	6594.53	7184.81	12394	8276.7	3.83587	1.93955	0.0584052	0.260428
hsa-miR-3193	4.25034	2.15665	3.44903	3.30737	2.8397	-3.57399	-1.83754	0.0590638	0.262336
hsa-miR-432-3p	19.6941	19.3355	10.5039	18.8107	37.8167	3.08495	1.62524	0.059094	0.262336
hsa-miR-4640-3p	10.507	3.56963	6.66291	8.95746	9.61029	-3.51724	-1.81444	0.061068	0.263536
hsa-miR-4318	24.578	3.49527	2.19484	5.44338	7.89463	-3.66392	-1.87339	0.060939	0.263536
hsa-miR-6819-3p	27.3764	22.5333	26.8084	24.1851	73.3754	3.09843	1.63154	0.060875	0.263536
hsa-miR-154-5p	52.192	412.665	470.793	389.719	188.909	-3.37165	-1.75345	0.0598093	0.263536
hsa-miR-1245a	10.507	7.288	13.561	3.58299	3.86515	-2.84135	-1.50657	0.0600574	0.263536
hsa-miR-10b-3p	3.51115	3.49527	3.52742	4.27202	3.02704	3.38919	1.76094	0.0597998	0.263536
hsa-miR-1225-3p	12.487	16.2121	10.5039	10.4044	8.04253	-2.83306	-1.50236	0.0605583	0.263536
hsa-miR-139-3p	81.1524	130.515	223.639	5.8568	62.5753	-3.10518	-1.63468	0.0600944	0.263536
hsa-miR-6830-3p	4.17114	2.08229	1.95968	3.23847	5.1371	3.1134	1.63849	0.0608134	0.263536
hsa-miR-6512-3p	7.73509	7.36237	4.78162	10.9557	9.48868	-2.93863	-1.55514	0.0608805	0.263536
hsa-miR-4497	1.95357	7.95731	1.72452	1.37807	6.73443	3.23454	1.69356	0.0610433	0.263536
hsa-miR-500a-3p	4.96313	2.75159	0.235161	5.719	3.44117	-4.48519	-2.16517	0.0600656	0.263536
hsa-miR-6836-3p	8.87027	8.77535	8.62259	5.16777	12.8082	2.53627	1.34271	0.060936	0.263536
hsa-miR-296-3p	52.3768	21.3434	18.3426	42.5135	31.7987	-3.18845	-1.67286	0.0612119	0.263591
hsa-miR-1264	30.6764	3.71837	8.38743	24.8053	27.7857	3.77817	1.91769	0.0613996	0.263834
hsa-miR-6758-5p	0.923987	4.09021	2.58678	10.4044	3.72382	3.73654	1.9017	0.0623046	0.265404
hsa-miR-4501	5.27992	1.11551	3.21387	0.344518	1.47572	-3.82157	-1.93416	0.0624475	0.265404
hsa-miR-11401	4.77833	5.35445	6.97646	4.89215	4.60794	-3.23363	-1.69315	0.0625639	0.265404
hsa-miR-4528	0.844788	0	1.33258	1.58478	1.10104	5.46821	2.45107	0.0624242	0.265404
hsa-miR-105-3p	21.4365	20.2279	15.5207	25.3565	15.878	-2.71783	-1.44245	0.0626888	0.265404
hsa-miR-381-5p	7.55029	6.54433	14.7368	17.7082	10.1033	-2.63878	-1.39987	0.062075	0.265404
hsa-miR-4455	17.7405	23.277	15.2071	66.6986	24.1835	-3.23042	-1.69172	0.0623412	0.265404
hsa-miR-342-3p	82.5516	414.078	399.147	483.979	362.216	3.33514	1.73775	0.0630182	0.266238
hsa-miR-26b-3p	0.237597	6.6187	13.561	10.1288	18.1655	3.57378	1.83745	0.0632086	0.266483
hsa-miR-3154	7.36549	6.32123	8.62259	21.7046	13.597	2.69104	1.42816	0.0638594	0.268103
hsa-miR-607	61.8279	19.5586	22.0268	7.85501	16.5485	-3.06028	-1.61366	0.0637426	0.268103
hsa-miR-3200-5p	12.4342	7.65984	4.70323	6.40803	4.33843	-2.83441	-1.50305	0.0640327	0.26827
hsa-miR-125b-1-3p	72.599	130.589	188.991	432.645	304.19	3.10307	1.63369	0.0642057	0.268436
hsa-miR-5587-3p	7.70869	15.6915	9.56323	11.3002	16.8279	2.69122	1.42826	0.0644181	0.268765
hsa-miR-512-5p	4.09194	0.0743674	0.156774	0.206711	2.90544	5.03156	2.33101	0.0659945	0.273212
hsa-miR-4686	2.00637	7.5111	6.50613	8.47514	3.50033	-3.64301	-1.86513	0.0658778	0.273212
hsa-miR-657	6.15111	6.32123	8.85775	7.09707	12.9233	2.71045	1.43853	0.0660274	0.273212
hsa-miR-6864-5p	4.22394	2.60286	5.33033	2.75614	2.72795	-3.51239	-1.81245	0.065989	0.273212
hsa-miR-5191	8.79107	8.84972	5.64387	4.75435	3.46417	-3.14323	-1.65225	0.0664574	0.274427
hsa-miR-4445-3p	1.10878	3.49527	1.41097	1.30917	2.47817	3.54504	1.8258	0.067188	0.275212
hsa-miR-4661-3p	27.5612	53.9163	46.3268	14.6765	47.4697	3.27494	1.71147	0.0673318	0.275212
hsa-miR-3116	77.0605	106.122	107.234	35.4164	32.6303	-2.96328	-1.5672	0.0672781	0.275212
hsa-miR-5187-5p	37.3291	40.4558	2.11645	21.3601	15.993	-3.63832	-1.86327	0.0669235	0.275212
hsa-miR-208a-3p	3.77515	1.41298	0.313549	2.27382	2.73453	4.01808	2.00651	0.0671491	0.275212
hsa-miR-1273h-3p	4.51433	7.58547	6.66291	0.137807	2.28754	-3.57232	-1.83686	0.0674825	0.275268
hsa-miR-138-2-3p	1.53118	0.818041	3.21387	0.275614	2.75753	3.53028	1.81978	0.0678696	0.275729
hsa-miR-6069	27.5348	14.8735	17.7155	56.3631	21.8105	-2.60075	-1.37893	0.0677907	0.275729
hsa-let-7a-2-3p	14.0446	47.6695	71.8026	71.7286	41.1658	-2.93463	-1.55318	0.0683479	0.277112
hsa-miR-3652	20.0373	13.6092	23.2026	9.50869	9.137	-2.71063	-1.43863	0.0695414	0.281384
hsa-miR-1245b-5p	8.47428	3.644	5.01678	4.89215	8.95295	2.71748	1.44227	0.0702555	0.283702
hsa-miR-6850-3p	15.9718	15.0966	11.5229	30.1798	18.2379	2.60516	1.38137	0.0708608	0.284433
hsa-miR-5090	0.871187	0.966776	0.156774	0.275614	1.10762	4.94625	2.30633	0.0708154	0.284433
hsa-miR-670-5p	7.49749	9.74213	27.0436	21.5668	17.5542	2.95682	1.56405	0.0707425	0.284433
hsa-miR-595	44.0874	45.5128	54.2439	10.6801	15.2075	-2.88251	-1.52732	0.0715498	0.286057
hsa-miR-6813-3p	58.4752	17.8482	12.6203	9.43979	17.1697	-2.96973	-1.57033	0.0715093	0.286057
hsa-miR-6772-3p	1.92717	0.966776	1.56774	2.96285	4.05906	3.45242	1.78761	0.072345	0.288662
hsa-miR-584-5p	96.0154	266.979	186.405	118.239	96.6748	-2.8799	-1.52602	0.0725029	0.288719
hsa-miR-367-5p	0.184797	2.00792	1.01903	0.620132	2.44859	4.94944	2.30727	0.0728292	0.289446
hsa-miR-6828-5p	22.2285	4.61078	5.4871	2.20491	4.74927	-3.51735	-1.81449	0.074191	0.294276
hsa-miR-6749-3p	24.6836	9.66776	13.4826	47.3367	29.3995	2.94716	1.55932	0.0743784	0.294439
hsa-miR-6795-3p	5.75512	5.35445	4.15452	9.78431	10.9381	2.43391	1.28328	0.074755	0.294769
hsa-miR-5007-3p	4.72553	12.7912	21.3213	0.620132	5.71556	-2.62966	-1.39488	0.0746114	0.294769
hsa-miR-548at-5p	6.38871	5.80065	5.87904	0	2.70166	-3.23513	-1.69382	0.0750189	0.295231
hsa-miR-1285-5p	0.290396	3.4209	4.23291	5.8568	1.456	-5.5908	-2.48305	0.0757503	0.29702
hsa-miR-92a-2-5p	3.03596	1.63608	6.42775	3.51408	5.22913	2.8792	1.52567	0.075769	0.29702
hsa-miR-205-3p	3.19435	2.67723	2.19484	0.482325	1.60719	-4.01007	-2.00363	0.0761922	0.298098
hsa-miR-4731-3p	5.64952	3.34653	4.78162	0.482325	2.03775	-3.04253	-1.60527	0.0773873	0.302186
hsa-miR-1343-3p	32.8147	10.4858	25.2407	13.0228	12.4533	-2.99273	-1.58146	0.0782536	0.304977
hsa-miR-4693-3p	10.7974	7.95731	4.07613	1.58478	4.58494	-3.23286	-1.69281	0.0784844	0.305284
hsa-miR-4280	24.6044	16.0634	23.7513	17.4326	16.91	-2.49204	-1.31733	0.0792048	0.306899
hsa-miR-374b-3p	19.3773	11.8244	18.3426	10.8179	11.4443	-2.99704	-1.58354	0.0791716	0.306899
hsa-miR-3908	1.34638	2.37976	1.33258	3.9275	3.19138	3.70345	1.88887	0.0796033	0.30785
hsa-miR-518e-3p	1.08238	1.18988	1.88129	0.413421	1.24566	3.84174	1.94176	0.0798129	0.308068
hsa-miR-3202	119.96	62.9892	111.702	104.665	145.084	3.42521	1.77619	0.0801602	0.308816
hsa-miR-374a-5p	8.94947	131.853	137.961	46.5099	43.4632	-3.46886	-1.79446	0.0805329	0.309659
hsa-miR-4292	38.6226	111.402	104.412	161.097	153.567	2.81574	1.49351	0.0813379	0.312157
hsa-miR-202-5p	3.64315	1.63608	0.235161	4.47873	2.94159	3.23685	1.69459	0.081608	0.312598
hsa-miR-2053	9.08147	2.90033	9.32807	35.8299	9.02197	-3.22606	-1.68977	0.081814	0.312791
hsa-miR-1301-3p	23.7069	14.3529	29.4736	24.0473	15.7334	-2.48467	-1.31306	0.0820825	0.313222
hsa-miR-433-5p	11.6686	18.9637	15.2855	22.118	16.5551	-2.58276	-1.36891	0.0826073	0.314583
hsa-miR-5581-3p	9.29267	19.4843	12.9339	40.2397	17.9289	-2.73735	-1.45278	0.0827521	0.314583
hsa-miR-219b-3p	25.1588	9.07282	5.95742	2.48053	7.37205	-2.80414	-1.48756	0.0836009	0.31685
hsa-miR-1468-5p	5.59672	12.8656	11.131	67.5255	17.2683	-2.87225	-1.52218	0.0836636	0.31685
hsa-miR-6507-5p	5.64952	2.75159	3.6842	0.137807	1.31468	-3.26939	-1.70902	0.0840217	0.317608
hsa-miR-4683	3.61675	5.72629	5.4871	4.20312	3.74354	-3.26234	-1.70591	0.0842557	0.317895
hsa-miR-668-5p	8.21028	5.35445	6.03581	3.03176	9.12057	2.56794	1.36061	0.0856495	0.322549
hsa-miR-660-3p	8.89667	7.36237	14.0313	26.1144	12.1246	2.40122	1.26377	0.085848	0.322692
hsa-miR-320e	32.8411	118.17	40.6045	91.6417	42.4148	-2.87788	-1.52501	0.0862233	0.323183
hsa-miR-4321	8.60628	6.91617	17.2452	33.2804	22.0767	2.72207	1.44471	0.0863001	0.323183
hsa-miR-3161	7.97268	6.32123	0.783872	0.895746	3.1125	-3.19481	-1.67573	0.0867258	0.324174
hsa-miR-5003-5p	1.55758	3.4209	2.11645	0.0689036	0.726359	-4.30736	-2.1068	0.0876253	0.326928
hsa-miR-4730	9.71506	10.2627	4.23291	6.33913	10.1197	2.44968	1.29259	0.0884176	0.329274
hsa-miR-5586-3p	16.0246	4.61078	6.03581	0.206711	4.29899	-2.55353	-1.35249	0.0890385	0.330973
hsa-miR-8088	2.87756	1.48735	2.03807	0.689036	1.78467	-3.97414	-1.99064	0.0898049	0.331981
hsa-miR-4480	9.63586	48.1157	4.86	0.275614	20.7752	3.92632	1.97318	0.0897892	0.331981
hsa-miR-760	39.5202	85.2994	29.3168	40.7909	69.4708	3.11204	1.63786	0.0896423	0.331981
hsa-miR-15a-5p	346.627	2612.82	4300.01	6108.78	4760.12	3.29431	1.71998	0.0900046	0.332109
hsa-miR-4475	10.0319	4.68514	11.9148	26.2523	16.3874	2.45632	1.2965	0.0907456	0.332631
hsa-miR-449b-3p	1.34638	1.11551	4.46807	9.7154	5.40332	3.28942	1.71783	0.0908077	0.332631
hsa-miR-218-2-3p	41.2362	54.66	66.7075	49.4039	87.2518	2.85095	1.51145	0.0907839	0.332631
hsa-miR-605-3p	1.34638	0.223102	2.11645	0.275614	2.79697	3.94568	1.98027	0.0907505	0.332631
hsa-miR-219a-2-3p	22.4661	11.3782	4.93839	0.206711	6.28415	-2.81937	-1.49537	0.0915305	0.334669
hsa-miR-4787-5p	0.211197	0.446204	1.56774	1.72259	2.42887	4.76766	2.25328	0.0920827	0.336077
hsa-miR-3152-3p	1.97997	9.51902	5.64387	1.9293	3.56935	-3.56133	-1.83242	0.0922615	0.336119
hsa-miR-324-3p	21.5949	9.89086	16.6965	26.2523	22.8951	-2.71907	-1.44311	0.0927818	0.337403
hsa-miR-873-5p	1.63678	3.27216	0.0783872	0.413421	1.18978	-5.17938	-2.37278	0.09365	0.339946
hsa-miR-4662a-3p	29.198	33.3166	12.3852	1.9982	9.20274	-2.51959	-1.33319	0.0949779	0.342783
hsa-miR-1237-3p	13.3318	14.7991	19.6752	37.0012	32.0748	2.42843	1.28002	0.0949096	0.342783
hsa-miR-1181	8.21028	6.32123	1.72452	13.2295	7.7303	2.71361	1.44021	0.0946322	0.342783
hsa-miR-4652-5p	1.76877	0.148735	0.705484	4.40983	1.54803	4.15706	2.05556	0.0951134	0.342783
hsa-miR-3182	72.2822	3.8671	9.56323	13.7118	26.0043	-3.30556	-1.72489	0.0957827	0.344042
hsa-miR-587	0.0791989	0.743674	1.72452	1.72259	1.03202	4.70067	2.23287	0.0958047	0.344042
hsa-miR-6812-3p	12.4606	1.48735	2.27323	7.64829	3.67123	-3.61807	-1.85522	0.0968146	0.346706
hsa-miR-137-5p	5.67592	2.37976	2.03807	2.68724	2.0739	-3.44216	-1.78332	0.0968913	0.346706
hsa-miR-924	4.93673	3.56963	2.90032	15.8478	4.69011	-2.88501	-1.52857	0.0976582	0.34821
hsa-miR-6090	13.4902	11.75	15.2855	6.89036	13.1961	-2.31677	-1.21212	0.0975418	0.34821
hsa-miR-596	25.6604	5.35445	9.87678	47.2678	28.3872	-2.91291	-1.54246	0.0986865	0.351254
hsa-miR-8083	4.91033	9.74213	2.35161	0.344518	6.81331	3.22908	1.69112	0.0993579	0.352815
hsa-miR-7111-3p	0.211197	4.98261	1.64613	2.96285	4.00976	3.6945	1.88538	0.099476	0.352815
hsa-miR-6074	1.97997	2.97469	2.27323	6.13242	3.852	2.84464	1.50825	0.100286	0.354738
hsa-miR-9901	12.5926	7.5111	10.1903	4.13421	5.44934	-2.54655	-1.34855	0.100371	0.354738
hsa-miR-6850-5p	12.5926	6.8418	10.1903	12.8161	10.4352	-2.47598	-1.308	0.101692	0.358775
hsa-miR-802	2.77196	0.148735	0.0783872	2.41162	1.55461	-5.82351	-2.54189	0.10253	0.359839
hsa-miR-4456	24.6572	13.758	8.46581	4.13421	14.823	2.6949	1.43023	0.102265	0.359839
hsa-miR-1257	1.84797	2.37976	1.25419	2.20491	2.25138	-4.2185	-2.07673	0.102447	0.359839
hsa-miR-196a-5p	775.806	3971.14	3096.53	270.446	782.614	-2.97351	-1.57217	0.102993	0.360834
hsa-miR-214-3p	334.14	265.268	283.683	409.769	500.543	2.65995	1.4114	0.10363	0.362433
hsa-miR-634	2.13837	7.21363	3.44903	6.89036	5.98507	2.66804	1.41578	0.104109	0.363089
hsa-miR-6817-3p	1.39918	6.39559	2.35161	7.92391	5.6301	3.03384	1.60114	0.104833	0.363089
hsa-miR-8086	4.59353	0.669306	4.86	0.826843	1.81097	-3.5753	-1.83806	0.104658	0.363089
hsa-miR-567	2.37597	2.90033	1.56774	0.413421	2.73453	2.91407	1.54304	0.1049	0.363089
hsa-miR-513b-5p	10.7974	7.65984	3.91936	2.06711	3.71396	-3.11102	-1.63739	0.104397	0.363089
hsa-miR-4665-3p	89.9963	91.2488	108.331	131.192	123.501	2.72161	1.44446	0.104714	0.363089
hsa-miR-299-3p	6.07191	13.6836	24.0649	13.7118	7.58568	-2.69495	-1.43026	0.105257	0.363698
hsa-miR-3944-5p	13.6486	6.24686	12.6987	11.6447	5.65968	-2.45778	-1.29736	0.105709	0.364632
hsa-miR-936	3.69595	11.0807	8.07388	8.13062	5.61696	-2.64444	-1.40296	0.10607	0.36525
hsa-miR-3921	7.60309	5.80065	5.56549	10.749	9.19945	2.33347	1.22248	0.107428	0.367716
hsa-miR-1538	113.122	24.3925	38.1745	32.2469	40.1108	-2.80599	-1.48851	0.10748	0.367716
hsa-miR-128-1-5p	9.13427	20.0048	11.2877	7.09707	8.47638	-2.48265	-1.31188	0.107318	0.367716
hsa-miR-7159-5p	12.8038	18.5918	12.9339	3.37627	6.58324	-2.21451	-1.14699	0.107517	0.367716
hsa-miR-552-3p	34.7419	7.95731	3.13549	10.1977	8.86421	-2.84625	-1.50906	0.107743	0.367863
hsa-miR-450b-5p	3.56395	1.93355	9.24968	15.3655	5.10752	-2.77719	-1.47363	0.108386	0.369432
hsa-miR-4452	18.6645	9.59339	0.940646	1.72259	5.67283	-2.92508	-1.54848	0.108734	0.369991
hsa-miR-5193	28.5116	9.07282	11.8365	26.459	30.7437	2.74657	1.45763	0.110513	0.374978
hsa-miR-4534	2.29677	0.223102	0.235161	1.8604	2.40586	3.79167	1.92284	0.110573	0.374978
hsa-miR-4254	22.3605	11.3782	2.82194	6.33913	7.69415	-2.80791	-1.4895	0.111434	0.376825
hsa-miR-489-5p	7.0751	1.41298	1.17581	1.65369	1.47572	-3.15995	-1.6599	0.111492	0.376825
hsa-miR-4660	10.0055	11.6757	1.72452	1.17136	4.52906	-2.96382	-1.56746	0.111727	0.376985
hsa-miR-548a-3p	2.48156	4.83388	10.1119	3.8586	3.14208	-3.0669	-1.61678	0.112917	0.38036
hsa-miR-134-3p	1.26718	4.75951	5.4871	11.0246	8.62757	2.88895	1.53054	0.113869	0.382926
hsa-miR-4743-3p	11.299	4.68514	3.29226	4.75435	5.88647	-2.88922	-1.53068	0.114314	0.383783
hsa-miR-6747-3p	7.52389	7.5111	11.2094	16.468	11.6316	2.31685	1.21216	0.114637	0.384226
hsa-miR-7976	7.2335	3.04906	13.3258	2.68724	3.4083	-2.94238	-1.55698	0.115088	0.384455
hsa-miR-4471	2.63996	1.85918	0.940646	1.79149	3.01061	2.84763	1.50976	0.115043	0.384455
hsa-miR-5003-3p	28.406	10.932	8.07388	0.275614	6.63254	-2.49866	-1.32116	0.116336	0.387509
hsa-miR-4684-3p	15.523	9.14719	8.62259	1.9982	6.01136	-2.33264	-1.22197	0.116388	0.387509
hsa-miR-10397-3p	24.0765	2.30539	6.97646	2.13601	4.97276	-2.86319	-1.51762	0.117438	0.39036
hsa-miR-4426	5.99271	3.79274	9.24968	3.9275	5.71556	-3.20108	-1.67856	0.118264	0.39186
hsa-miR-6717-5p	12.7246	14.8735	19.3616	10.6111	20.0883	2.34268	1.22816	0.118279	0.39186
hsa-miR-4742-5p	3.93354	4.53641	1.8029	4.06531	1.66964	-3.4044	-1.7674	0.119635	0.393759
hsa-miR-4711-5p	33.6859	13.6836	6.89807	7.16597	8.90036	-2.52249	-1.33485	0.119464	0.393759
hsa-miR-3135a	4.01274	65.4433	11.9932	3.72079	21.495	3.30199	1.72333	0.119601	0.393759
hsa-miR-4276	3.85434	11.6757	9.95517	3.58299	8.55197	2.39255	1.25855	0.119231	0.393759
hsa-miR-10401-3p	7.31269	3.1978	5.25194	8.75075	4.26284	-2.72278	-1.44508	0.120034	0.394425
hsa-miR-676-3p	31.4683	17.8482	16.5397	12.6094	12.3218	-2.3931	-1.25888	0.120257	0.394513
hsa-miR-4714-5p	33.5011	9.59339	26.8868	40.3775	24.5976	-2.60675	-1.38225	0.121351	0.396808
hsa-miR-7161-3p	12.3286	6.6187	8.70097	10.1288	12.1016	2.35693	1.23691	0.121224	0.396808
hsa-miR-466	3.06236	3.1978	1.64613	6.75255	5.04836	2.95004	1.56073	0.122063	0.398489
hsa-miR-4768-3p	3.16795	3.04906	0.156774	1.44697	4.7657	2.90853	1.54029	0.123125	0.398718
hsa-miR-6880-3p	4.46154	1.11551	3.84097	4.27202	4.6441	2.6745	1.41927	0.122905	0.398718
hsa-miR-4774-5p	1.50478	5.94939	4.62484	0.137807	2.47159	-3.61318	-1.85327	0.122747	0.398718
hsa-miR-144-5p	6.30951	5.42882	6.74129	0.206711	2.05418	-3.22437	-1.68902	0.123008	0.398718
hsa-miR-1228-5p	4.27674	4.75951	5.95742	0.344518	8.28575	2.47343	1.30651	0.122408	0.398718
hsa-miR-15b-3p	10.0319	27.5159	28.4545	58.0857	44.5708	2.39762	1.2616	0.123622	0.399686
hsa-miR-10527-5p	3.48475	12.9399	4.70323	1.79149	3.05991	-3.10853	-1.63623	0.124453	0.3998
hsa-miR-511-3p	1.61038	2.15665	0.235161	3.72079	3.33928	3.60745	1.85098	0.124005	0.3998
hsa-miR-3124-3p	7.2335	2.45412	3.99774	6.75255	4.85444	2.26696	1.18076	0.124057	0.3998
hsa-miR-3180	5.51752	25.9542	9.72001	17.3637	27.2763	2.52418	1.33581	0.124288	0.3998
hsa-miR-4666a-5p	22.0701	8.40351	0	0.0689036	5.47234	-3.43992	-1.78237	0.125045	0.401061
hsa-miR-4460	115.102	26.1029	31.982	42.4446	39.8511	-2.57336	-1.36365	0.125818	0.402256
hsa-miR-3136-5p	8.28948	27.9621	30.571	28.5261	15.9503	-2.17426	-1.12053	0.125692	0.402256
hsa-miR-1537-5p	1.84797	0.0743674	1.17581	0.413421	1.42314	3.62895	1.85955	0.126038	0.402321
hsa-miR-410-3p	11.563	198.263	298.89	215.737	89.7694	-3.0564	-1.61183	0.127003	0.403859
hsa-miR-3619-3p	2.61356	4.09021	1.48936	2.27382	2.37956	2.58691	1.37123	0.127055	0.403859
hsa-miR-503-3p	8.97587	11.3038	5.56549	23.9095	11.4903	2.25704	1.17443	0.127122	0.403859
hsa-miR-8062	18.2421	13.6836	5.25194	0.413421	7.45093	-2.34219	-1.22786	0.128035	0.405132
hsa-miR-5011-5p	2.24397	3.34653	11.6013	11.5758	3.37872	-3.09742	-1.63107	0.128327	0.405132
hsa-miR-5187-3p	11.5102	2.97469	2.11645	0.413421	3.35243	-2.8415	-1.50665	0.128329	0.405132
hsa-miR-4778-3p	3.00956	4.09021	2.74355	3.9275	3.83557	2.59908	1.378	0.127757	0.405132
hsa-miR-1267	5.54392	6.91617	5.17355	3.8586	6.79031	2.41108	1.26968	0.128994	0.405958
hsa-miR-122-5p	7.78789	27.2185	8.07388	4.54763	6.77716	-2.83686	-1.50429	0.128904	0.405958
hsa-miR-1286	5714.14	2098.8	1995.5	5933.08	8085.08	2.78847	1.47947	0.130607	0.409753
hsa-miR-4535	12.1702	13.4605	8.15226	1.03355	5.52822	-2.41415	-1.27151	0.130515	0.409753
hsa-miR-12128	5.30632	1.41298	1.09742	0.137807	3.47403	2.55979	1.35603	0.130904	0.410045
hsa-miR-7109-5p	3.24715	2.67723	6.03581	1.03355	4.23983	-2.71944	-1.44331	0.131233	0.410436
hsa-miR-6827-5p	10.0847	3.79274	4.93839	5.8568	6.08038	-2.56847	-1.36091	0.131673	0.411171
hsa-miR-6815-5p	23.3109	16.2121	8.5442	17.9149	12.1246	-2.43818	-1.2858	0.132627	0.411676
hsa-miR-382-3p	4.46154	17.1789	16.0694	2.89395	5.56437	-2.27128	-1.18351	0.132202	0.411676
hsa-miR-29a-5p	3.93354	7.80857	17.8723	20.5333	20.4925	2.37961	1.25073	0.132681	0.411676
hsa-miR-6756-5p	4.67273	3.4209	1.09742	0.344518	3.78956	2.58064	1.36773	0.132608	0.411676
hsa-miR-3124-5p	11.0086	37.0349	3.37065	6.06351	7.85191	-2.34364	-1.22875	0.132858	0.411676
hsa-miR-17-3p	5.83432	7.5111	10.1119	13.8496	10.8921	2.24822	1.16878	0.133644	0.413474
hsa-miR-7975	13.411	44.3973	9.32807	3.9275	6.92835	-2.50196	-1.32306	0.135262	0.417838
hsa-miR-3164	7.1543	0.0743674	1.64613	0.413421	2.1232	-3.53083	-1.82001	0.135525	0.418008
hsa-miR-3184-5p	57.5248	98.0906	156.382	196.031	136.25	2.43746	1.28538	0.136336	0.41956
hsa-miR-1909-5p	2.27037	5.05698	0	2.06711	2.67208	3.11454	1.63902	0.136446	0.41956
hsa-miR-518a-3p	2.66636	1.85918	1.17581	1.9293	2.39929	2.74193	1.45519	0.137306	0.420919
hsa-miR-5002-5p	26.0828	14.6504	22.4971	23.1516	30.4446	2.63443	1.39749	0.137207	0.420919
hsa-miR-6740-3p	4.22394	8.62661	12.2284	9.23308	3.77312	-2.68085	-1.42269	0.137795	0.421775
hsa-miR-223-5p	12.223	1.78482	1.64613	0.413421	3.07306	-2.94432	-1.55793	0.138299	0.422674
hsa-miR-1270	5.41192	0.520572	0.862259	5.65009	4.5685	2.71149	1.43909	0.138866	0.423763
hsa-miR-4709-5p	4.67273	8.25478	2.50839	2.82505	3.26697	-2.61593	-1.38732	0.139401	0.424567
hsa-miR-4999-3p	1.45198	3.56963	3.13549	2.13601	1.45272	-3.68133	-1.88023	0.139628	0.424567
hsa-miR-659-5p	15.3646	1.04114	0.627097	3.44518	3.81256	-3.19257	-1.67472	0.139763	0.424567
hsa-miR-3977	22.0437	6.17249	3.60581	3.65189	11.7631	-2.90688	-1.53947	0.13999	0.424617
hsa-miR-2276-5p	2.93036	5.50319	3.29226	3.10066	6.18555	2.57815	1.36633	0.140487	0.42548
hsa-miR-3130-5p	83.9244	46.6283	134.12	60.8418	54.9403	-2.35576	-1.23619	0.141196	0.426987
hsa-miR-497-3p	3.80155	3.4209	3.29226	4.75435	5.14039	2.26036	1.17655	0.141499	0.42726
hsa-miR-501-5p	7.36549	14.0554	9.79839	3.58299	4.11165	-2.4902	-1.31626	0.141735	0.427331
hsa-miR-184	7.91989	2.60286	2.90032	2.61834	3.28341	-2.63993	-1.4005	0.143734	0.432541
hsa-miR-6799-5p	8.42148	5.57755	7.52517	16.5369	8.52239	-2.30611	-1.20546	0.143894	0.432541
hsa-miR-4712-5p	3.56395	5.05698	4.70323	6.95926	3.91774	-3.22745	-1.6904	0.144782	0.433914
hsa-miR-4297	15.7606	7.80857	4.23291	8.75075	10.3334	2.36253	1.24033	0.144655	0.433914
hsa-miR-3664-5p	4.22394	14.9478	11.2877	12.7472	11.04	2.32071	1.21457	0.145298	0.434814
hsa-miR-4753-5p	26.426	21.7153	5.01678	4.34092	8.44351	-2.34199	-1.22773	0.145834	0.43577
hsa-miR-5702	3.64315	3.71837	2.19484	5.16777	3.17823	2.52292	1.33509	0.146568	0.43661
hsa-miR-92b-5p	19.2981	13.6836	20.851	29.4218	35.4503	2.23062	1.15744	0.146909	0.43661
hsa-miR-542-3p	5.91351	0.743674	2.74355	0.413421	3.57921	2.61413	1.38633	0.146984	0.43661
hsa-miR-376b-5p	2.58716	4.61078	1.8029	0.551228	1.70579	-3.29839	-1.72176	0.146639	0.43661
hsa-miR-1290	10.903	3.94147	8.93614	3.72079	9.3342	2.15301	1.10635	0.147706	0.438109
hsa-miR-580-3p	9.00227	4.98261	12.8555	2.61834	3.81914	-2.58391	-1.36956	0.14804	0.438452
hsa-miR-3144-5p	1.39918	2.67723	0.156774	1.24026	1.38698	3.42093	1.77439	0.149034	0.440746
hsa-miR-4687-5p	8.60628	6.24686	11.2094	22.5315	13.2322	2.1262	1.08828	0.149701	0.441401
hsa-miR-4762-5p	68.1638	34.2834	46.3268	178.667	82.0391	2.36009	1.23884	0.149627	0.441401
hsa-miR-1204	115.683	70.5003	53.3816	41.3421	57.2575	-2.3275	-1.21878	0.149914	0.441401
hsa-miR-618	0.0791989	2.15665	1.17581	8.26843	5.92591	3.83394	1.93883	0.15123	0.443975
hsa-miR-33a-3p	7.0751	5.28008	2.66516	19.982	8.9398	2.13132	1.09175	0.151049	0.443975
hsa-miR-4499	2.90396	5.42882	10.1119	2.20491	5.92591	2.31136	1.20874	0.151948	0.445299
hsa-miR-4537	8.97587	6.17249	1.56774	8.40623	5.37374	2.43102	1.28156	0.152458	0.445299
hsa-miR-219a-5p	18.4269	14.4273	29.2384	8.54404	11.3194	-2.38045	-1.25124	0.152621	0.445299
hsa-miR-6795-5p	2.03277	4.16457	1.72452	3.99641	3.1355	2.67298	1.41845	0.153003	0.445299
hsa-miR-3691-5p	8.60628	5.28008	4.70323	2.06711	3.21767	-2.35639	-1.23658	0.153009	0.445299
hsa-miR-4648	0.923987	1.41298	0.235161	0.413421	1.37384	3.88754	1.95886	0.152455	0.445299
hsa-miR-4523	8.02548	2.82596	3.60581	6.06351	3.1125	-2.60731	-1.38256	0.153509	0.446107
hsa-miR-532-3p	77.5357	34.209	65.0613	22.8071	83.551	-2.53467	-1.3418	0.154367	0.447955
hsa-miR-1323	6.20391	4.61078	12.8555	1.9293	6.28087	-2.38524	-1.25414	0.154681	0.448219
hsa-miR-181a-3p	43.4538	364.177	362.776	301.522	204.912	-2.49076	-1.31659	0.155057	0.448281
hsa-miR-4724-3p	2.48156	2.67723	1.01903	1.9293	3.59235	2.59402	1.37519	0.155148	0.448281
hsa-miR-6825-5p	3.64315	0.223102	2.03807	0.344518	3.05005	2.70306	1.43459	0.155448	0.448502
hsa-miR-6823-5p	36.2995	14.576	17.4019	12.3337	14.8361	-2.32442	-1.21687	0.155935	0.449263
hsa-miR-875-5p	2.79836	0.0743674	1.48936	0.344518	0.742792	-3.86774	-1.95149	0.159828	0.45982
hsa-miR-767-5p	2.40237	1.18988	7.99549	6.54584	4.25627	2.55314	1.35227	0.160325	0.460591
hsa-miR-4253	8.44788	8.99845	3.76258	3.8586	4.45675	-2.20011	-1.13758	0.160751	0.461157
hsa-miR-4257	2.03277	2.97469	1.72452	0.206711	2.55705	2.49335	1.31808	0.160999	0.461208
hsa-miR-6868-3p	6.01911	3.04906	11.2877	12.1959	10.1756	2.35885	1.23808	0.161567	0.462179
hsa-miR-4804-3p	4.30314	0.594939	1.17581	2.75614	2.28425	-2.96005	-1.56562	0.162179	0.462657
hsa-miR-572	2.37597	2.30539	5.25194	6.27022	3.62193	2.45279	1.29442	0.162195	0.462657
hsa-miR-1236-5p	2.48156	0.594939	0.235161	0.413421	1.10104	-3.83698	-1.93997	0.162701	0.463443
hsa-miR-224-3p	2.66636	1.33861	4.54645	0.275614	1.81754	-3.14358	-1.65241	0.167102	0.464503
hsa-miR-8485	4.25034	1.71045	2.27323	1.44697	5.19626	2.38555	1.25432	0.166258	0.464503
hsa-miR-12126	4.54073	2.23102	2.82194	5.92571	3.61536	2.34465	1.22937	0.163987	0.464503
hsa-miR-3973	0.211197	2.45412	0	2.27382	1.17335	3.99423	1.99792	0.166505	0.464503
hsa-miR-181d-3p	3.27355	6.91617	4.31129	0.482325	3.25382	-2.78755	-1.479	0.165414	0.464503
hsa-miR-6892-3p	4.38234	3.34653	4.62484	4.82325	4.48305	2.33326	1.22235	0.166217	0.464503
hsa-miR-1184	7.1015	4.68514	8.07388	2.34272	3.9013	-2.30672	-1.20584	0.167398	0.464503
hsa-miR-5002-3p	4.77833	4.38767	0.156774	4.20312	3.39515	2.78339	1.47684	0.164358	0.464503
hsa-miR-4424	3.59035	1.04114	1.17581	0.344518	1.03531	-3.11542	-1.63943	0.163453	0.464503
hsa-miR-6809-5p	1.47838	5.20572	4.15452	7.30378	4.42389	2.42907	1.2804	0.167285	0.464503
hsa-miR-24-3p	6561.41	38729	38026.1	14245	27365.1	2.67787	1.42109	0.165429	0.464503
hsa-miR-3153	8.10468	5.05698	6.50613	2.75614	6.82317	2.11996	1.08404	0.167461	0.464503
hsa-miR-12130	38.3322	11.4526	16.8532	9.92211	10.8198	-2.34443	-1.22923	0.167268	0.464503
hsa-miR-4326	18.9021	3.34653	0.783872	14.9521	11.8617	2.66542	1.41436	0.1649	0.464503
hsa-miR-499a-5p	12.5926	13.163	33.001	19.4308	8.81491	-2.21013	-1.14413	0.165389	0.464503
hsa-miR-5591-3p	2.11197	1.85918	9.32807	4.47873	2.28096	-2.81278	-1.492	0.167307	0.464503
hsa-miR-4798-5p	6.41511	3.27216	2.11645	3.03176	2.75753	2.30073	1.20209	0.166084	0.464503
hsa-miR-5006-5p	4.64633	2.82596	5.56549	3.58299	6.59968	2.40308	1.26489	0.164903	0.464503
hsa-miR-647	24.6836	29.7469	23.8297	45.2696	21.3865	-2.15961	-1.11077	0.164365	0.464503
hsa-miR-891b	1.55758	3.8671	7.21162	1.37807	2.16593	-3.22263	-1.68824	0.168891	0.467822
hsa-miR-1193	13.939	5.87502	4.62484	7.02816	6.17569	-2.25561	-1.17352	0.169179	0.467978
hsa-miR-3927-3p	23.3109	137.58	98.7678	124.578	98.7289	2.31213	1.20922	0.169974	0.469531
hsa-miR-6832-3p	3.06236	1.11551	0	3.23847	2.88572	3.04417	1.60605	0.170456	0.469571
hsa-miR-6879-3p	2.63996	3.71837	0.313549	8.13062	2.66551	2.80037	1.48562	0.170399	0.469571
hsa-miR-1271-3p	10.771	3.49527	9.95517	21.0845	10.7508	-2.19483	-1.13411	0.170939	0.470259
hsa-miR-1197	8.02548	0.148735	5.33033	2.82505	7.2373	2.89535	1.53374	0.171557	0.470469
hsa-miR-125a-5p	2416.41	8721.66	21273.4	19591	15443.3	2.54481	1.34756	0.171504	0.470469
hsa-miR-302a-5p	7.73509	4.75951	5.4871	1.58478	3.4576	-2.22605	-1.15449	0.171718	0.470469
hsa-miR-378a-5p	6.25671	5.20572	21.1645	14.4697	12.3481	2.17914	1.12376	0.171959	0.470489
hsa-miR-4650-5p	12.5662	27.2185	21.87	0.137807	6.31373	-2.08424	-1.05952	0.172429	0.471135
hsa-miR-627-5p	7.68229	3.04906	0.627097	5.719	3.90459	-2.78843	-1.47945	0.173228	0.472674
hsa-miR-132-5p	68.0582	254.336	162.967	2147.45	585.781	-2.24803	-1.16866	0.17381	0.47362
hsa-miR-1265	20.7765	24.8387	13.169	22.3937	13.7778	-2.16409	-1.11376	0.174624	0.473952
hsa-miR-4783-3p	13.0414	4.90825	5.95742	5.09886	4.73941	-2.17512	-1.12109	0.174639	0.473952
hsa-miR-5579-3p	28.3532	257.311	304.142	292.84	238.009	2.49591	1.31957	0.174267	0.473952
hsa-miR-648	1.45198	0.223102	1.41097	0.413421	1.68279	3.51542	1.8137	0.177017	0.47401
hsa-miR-4732-3p	2.19117	5.35445	13.4826	13.9874	8.59141	2.18595	1.12826	0.176951	0.47401
hsa-miR-6787-3p	3.37915	5.05698	6.1142	1.30917	3.87172	2.29644	1.1994	0.176345	0.47401
hsa-miR-4679	10.3487	12.7168	8.15226	11.438	11.5067	1.97987	0.985408	0.176174	0.47401
hsa-miR-516a-3p	16.7374	45.2154	21.0861	18.604	14.9084	-2.10873	-1.07637	0.176738	0.47401
hsa-miR-6806-5p	2.08557	4.53641	3.84097	4.40983	4.815	2.47813	1.30925	0.175805	0.47401
hsa-miR-1296-5p	3.03596	5.80065	3.99774	15.5722	10.7278	-2.44545	-1.2901	0.175152	0.47401
hsa-miR-10400-3p	26.1884	8.25478	10.5823	9.02637	8.80505	-2.2487	-1.16909	0.176124	0.47401
hsa-miR-552-5p	3.61675	1.18988	0.0783872	1.03355	1.98188	2.90673	1.5394	0.175002	0.47401
hsa-miR-335-3p	427.991	299.106	474.791	410.114	511.081	2.3358	1.22392	0.176227	0.47401
hsa-miR-6794-3p	2.61356	1.33861	1.88129	0.482325	2.0739	2.47615	1.3081	0.177897	0.475732
hsa-miR-10393-3p	3.29995	0.0743674	0.235161	1.8604	1.91285	-3.77186	-1.91528	0.178562	0.47636
hsa-miR-2054	3.48475	3.71837	0	0.0689036	1.39684	-3.77274	-1.91561	0.178605	0.47636
hsa-miR-6508-3p	16.5262	17.6994	18.1858	6.68365	8.27918	-2.11044	-1.07754	0.179045	0.476901
hsa-miR-4468	1.61038	2.90033	0.0783872	2.75614	1.60391	3.25932	1.70457	0.180664	0.480575
hsa-miR-621	1.53118	1.48735	0.235161	2.20491	1.27524	2.93909	1.55537	0.181921	0.48328
hsa-miR-4722-5p	6.44151	6.02376	3.76258	2.89395	8.27918	2.01911	1.01372	0.182898	0.485235
hsa-miR-583	5.33272	5.28008	1.56774	0.482325	3.21767	-2.51059	-1.32803	0.186149	0.488701
hsa-miR-6856-3p	3.88074	1.04114	1.64613	0.344518	2.68523	2.22329	1.1527	0.186075	0.488701
hsa-miR-6854-5p	10.771	28.6314	23.2026	32.3158	22.8819	2.04774	1.03403	0.184518	0.488701
hsa-miR-22-3p	1570.28	15848.1	25175.4	23586	16636.5	2.58211	1.36855	0.185824	0.488701
hsa-miR-1292-5p	35.9299	38.8941	42.4858	40.033	47.5223	2.19529	1.13441	0.18511	0.488701
hsa-miR-4654	4.40874	9.29592	13.7178	18.0527	15.1582	2.05304	1.03776	0.185226	0.488701
hsa-miR-7977	559.276	111.625	124.636	392.75	229.845	-2.38933	-1.25661	0.185455	0.488701
hsa-miR-192-5p	4.03914	53.5445	41.9371	48.3703	39.9859	2.39866	1.26223	0.18586	0.488701
hsa-miR-5195-5p	3.45835	26.8466	100.257	46.3032	24.5352	-2.46526	-1.30174	0.186454	0.488863
hsa-miR-8063	2.90396	1.48735	0.0783872	0.482325	1.04188	-3.38529	-1.75928	0.18697	0.489579
hsa-miR-671-5p	5.96631	42.7612	31.1981	34.314	48.173	2.23211	1.15841	0.188073	0.491828
hsa-miR-5008-5p	35.7715	6.69306	10.3471	21.9802	32.5547	2.52764	1.33779	0.188667	0.492739
hsa-miR-6777-5p	6.49431	31.5318	23.2026	12.885	10.1132	-2.20695	-1.14205	0.190089	0.495808
hsa-miR-6842-3p	9.42466	14.6504	10.5039	12.3337	12.3054	1.92886	0.94775	0.190373	0.495907
hsa-let-7a-3p	48.7865	677.115	871.116	2937.57	1272.02	2.49161	1.31708	0.190958	0.496787
hsa-miR-4765	17.2918	16.1377	15.7558	3.99641	5.28171	-2.08211	-1.05805	0.191467	0.497467
hsa-miR-486-5p	8.05188	17.0301	20.2239	2.20491	7.3359	-2.11934	-1.08362	0.192086	0.497789
hsa-miR-4527	1.68958	0.446204	1.17581	0.895746	1.74852	2.98673	1.57857	0.192035	0.497789
hsa-miR-6728-5p	30.5444	26.1773	16.9316	202.508	60.8038	-2.17928	-1.12385	0.19292	0.499309
hsa-miR-3670	1.45198	0.148735	1.48936	2.75614	3.26697	3.08033	1.62309	0.193261	0.499546
hsa-miR-7162-3p	9.79426	2.45412	7.21162	1.65369	2.93502	-2.1066	-1.07492	0.193945	0.500672
hsa-miR-6779-3p	5.14793	7.43674	11.4445	7.7172	3.72054	-2.18109	-1.12505	0.196424	0.502638
hsa-miR-1972	8.23668	3.1978	0.783872	3.44518	3.51019	-2.54185	-1.34588	0.196187	0.502638
hsa-miR-7155-5p	17.107	10.3371	4.31129	5.99461	5.29486	-2.07249	-1.05136	0.195863	0.502638
hsa-miR-6837-3p	12.5662	9.22155	12.9339	53.5381	19.5854	-1.98648	-0.990215	0.196456	0.502638
hsa-miR-3117-3p	2.90396	3.94147	2.82194	8.19952	3.70081	2.34387	1.22889	0.195296	0.502638
hsa-miR-1298-5p	4.25034	2.37976	5.33033	0.275614	1.91285	-2.21745	-1.1489	0.196121	0.502638
hsa-miR-6828-3p	4.72553	2.08229	2.82194	0.689036	2.53404	-2.40637	-1.26686	0.196443	0.502638
hsa-miR-153-3p	0.71279	3.27216	2.74355	0.275614	2.866	-3.28236	-1.71473	0.196973	0.503319
hsa-miR-339-3p	7.1015	30.9368	53.5384	24.1851	31.6344	2.3067	1.20583	0.198248	0.505935
hsa-miR-7849-3p	7.0487	1.71045	4.15452	1.37807	2.64907	-2.41192	-1.27018	0.199559	0.506541
hsa-miR-4773	1.13518	0.223102	1.88129	0	1.74852	3.04589	1.60686	0.199885	0.506541
hsa-miR-378a-3p	109.585	798.854	721.397	341.624	496.221	2.37206	1.24614	0.199093	0.506541
hsa-miR-4268	8.79107	3.8671	8.15226	9.92211	8.82805	2.09012	1.06359	0.200249	0.506541
hsa-miR-1237-5p	10.4806	9.37029	5.4871	6.75255	5.85031	-2.10243	-1.07206	0.199872	0.506541
hsa-miR-7156-3p	6.8375	5.50319	9.24968	7.02816	8.3975	2.0055	1.00396	0.198882	0.506541
hsa-miR-5011-3p	201.957	81.6554	97.592	27.6303	74.9464	-2.20114	-1.13825	0.200234	0.506541
hsa-miR-4720-3p	1.79517	1.26425	2.66516	0.137807	1.84712	2.50203	1.3231	0.20071	0.50707
hsa-miR-605-5p	12.2494	4.68514	12.3852	11.8514	10.8592	-2.05808	-1.0413	0.20304	0.507873
hsa-miR-3120-3p	11.959	16.7327	0.0783872	0.206711	3.8027	-2.58581	-1.37062	0.204025	0.507873
hsa-miR-3680-5p	5.01593	3.644	0.940646	2.54943	3.2111	2.32516	1.21733	0.204311	0.507873
hsa-miR-2278	3.85434	1.48735	0	0.482325	2.88243	2.77642	1.47323	0.204196	0.507873
hsa-miR-12127	4.06554	3.94147	3.60581	2.54943	1.90628	-2.29269	-1.19704	0.202629	0.507873
hsa-miR-4269	3.08876	3.1978	0.156774	0.275614	0.907127	-3.14879	-1.6548	0.201817	0.507873
hsa-miR-4328	3.37915	0.892408	1.33258	3.65189	1.71565	-2.97185	-1.57136	0.204035	0.507873
hsa-miR-4431	40.3914	164.798	68.2752	824.087	443.023	2.14675	1.10215	0.201654	0.507873
hsa-miR-378g	2.63996	9.66776	5.40871	8.19952	8.00638	2.16468	1.11416	0.203738	0.507873
hsa-miR-3201	3.22075	6.24686	10.4255	7.16597	8.32848	2.20537	1.14102	0.203511	0.507873
hsa-miR-6762-5p	0.237597	1.63608	1.64613	5.8568	2.9153	3.10987	1.63685	0.2031	0.507873
hsa-miR-6724-5p	22.2813	5.28008	6.03581	4.68544	5.98507	-2.33995	-1.22648	0.201587	0.507873
hsa-miR-651-5p	49.5257	11.8988	15.3639	16.8814	16.3579	-2.31034	-1.20811	0.204183	0.507873
hsa-miR-4661-5p	25.1324	6.24686	18.5778	10.8868	16.0719	-2.08486	-1.05995	0.205133	0.509287
hsa-miR-6503-3p	9.05507	2.82596	2.03807	0.482325	4.97605	2.28093	1.18962	0.205822	0.510368
hsa-miR-1200	53.6704	30.1188	32.6874	23.6339	21.3799	-2.04892	-1.03487	0.208313	0.515909
hsa-miR-7515	6.9959	4.23894	4.70323	14.4008	9.95868	2.18615	1.12839	0.209322	0.51777
hsa-miR-6877-5p	6.30951	8.25478	8.5442	11.6447	6.82646	-2.13274	-1.09271	0.211217	0.521814
hsa-miR-589-3p	3.77515	0.966776	3.44903	6.75255	2.58334	-2.59189	-1.374	0.212147	0.522829
hsa-miR-4308	14.2822	9.66776	10.739	11.7825	9.16987	-1.90454	-0.929441	0.212858	0.522829
hsa-miR-7112-3p	2.85116	1.04114	0	2.06711	1.44614	-3.4755	-1.79722	0.212745	0.522829
hsa-miR-4448	3.32635	4.09021	1.25419	3.10066	3.40173	2.16318	1.11316	0.212927	0.522829
hsa-miR-4446-5p	10.639	6.17249	6.42775	13.2295	13.2256	1.95215	0.965065	0.212444	0.522829
hsa-miR-4291	2.21757	1.63608	1.09742	2.48053	2.3697	2.40968	1.26884	0.213278	0.523051
hsa-miR-4453	7.1015	8.47788	6.58452	10.749	8.644	1.92974	0.94841	0.214496	0.523099
hsa-miR-3065-5p	2.08557	1.71045	0.156774	0.413421	2.89229	2.85954	1.51578	0.214334	0.523099
hsa-miR-490-5p	5.35912	4.90825	3.29226	2055.19	900.531	2.12351	1.08645	0.213781	0.523099
hsa-miR-374a-3p	5.33272	43.1331	75.0165	29.3529	24.4135	-2.18449	-1.12729	0.214598	0.523099
hsa-miR-12133	10.7446	45.8103	86.1475	70.9707	52.3143	-2.1514	-1.10528	0.214039	0.523099
hsa-miR-4489	11.8798	2.60286	13.561	3.8586	9.24546	1.97925	0.984953	0.216146	0.526235
hsa-miR-550b-3p	4.17114	1.33861	0.783872	1.10246	2.01803	-2.53573	-1.3424	0.217025	0.527577
hsa-miR-214-5p	754.897	1023.59	1936.08	1533.72	1151.33	-2.21144	-1.14499	0.217222	0.527577
hsa-miR-326	10.1375	55.1062	92.1049	10.6801	56.8959	2.14055	1.09798	0.21838	0.529111
hsa-miR-6802-5p	18.7965	7.0649	7.29001	8.06172	7.70072	-2.05147	-1.03666	0.218175	0.529111
hsa-miR-4734	3.85434	0.148735	1.48936	9.92211	3.96375	2.54363	1.34689	0.219502	0.531189
hsa-miR-548aa	8.15748	3.79274	4.70323	7.44158	2.97774	-2.15516	-1.1078	0.21991	0.531537
hsa-miR-29a-3p	29.6468	447.989	1049.76	574.449	686.455	2.41024	1.26918	0.221514	0.532968
hsa-miR-4680-3p	7.2599	7.5111	5.64387	2.82505	5.17983	-1.94257	-0.957963	0.221624	0.532968
hsa-miR-204-3p	65.5239	62.3199	14.0313	69.9371	61.8358	2.19358	1.13329	0.222092	0.532968
hsa-miR-4671-3p	10.6918	13.8323	2.50839	2.20491	3.76655	-2.07306	-1.05176	0.222013	0.532968
hsa-miR-3616-5p	17.5029	2.97469	11.2094	2.41162	6.248	-2.04319	-1.03082	0.221299	0.532968
hsa-miR-4658	15.4702	6.09812	9.48485	28.7328	14.7507	-1.87125	-0.904005	0.221069	0.532968
hsa-miR-1225-5p	4.67273	4.68514	0.391936	0.275614	1.71237	-2.48538	-1.31347	0.222708	0.533808
hsa-miR-6782-5p	2.90396	2.67723	6.58452	7.44158	2.95145	2.06386	1.04534	0.223122	0.534166
hsa-miR-3918	2.03277	2.97469	1.8029	6.47693	2.88243	2.28427	1.19174	0.223593	0.534413
hsa-miR-8060	7.44469	8.70098	15.2071	2.20491	3.43788	-2.13456	-1.09394	0.22402	0.534413
hsa-miR-1285-3p	3.08876	1.41298	1.48936	2.34272	2.72467	2.23589	1.16085	0.224023	0.534413
hsa-miR-6750-3p	4.85753	3.4209	5.33033	0.757939	7.67114	2.15962	1.11078	0.225258	0.536722
hsa-miR-9900	20.0109	29.7469	6.27097	5.65009	23.0036	2.09139	1.06446	0.226157	0.537591
hsa-miR-564	6.44151	7.288	10.8958	18.9485	15.7202	1.91124	0.934506	0.226044	0.537591
hsa-miR-6888-5p	2.93036	4.23894	2.43	4.13421	2.90872	2.13547	1.09456	0.227984	0.538117
hsa-miR-6760-5p	3.61675	3.27216	2.35161	1.03355	4.35815	2.1398	1.09747	0.227135	0.538117
hsa-miR-1307-5p	3.51115	22.5333	34.8039	22.2558	11.464	-2.23104	-1.15771	0.227792	0.538117
hsa-miR-508-3p	16.1566	5.94939	5.25194	0.482325	6.07052	-2.01176	-1.00846	0.227297	0.538117
hsa-miR-7106-3p	6.8111	9.07282	5.64387	5.23667	5.12395	-2.06737	-1.0478	0.227795	0.538117
hsa-miR-5704	1.74237	1.11551	3.6842	6.06351	2.61949	2.34701	1.23082	0.227459	0.538117
hsa-miR-6753-5p	6.8111	3.1978	1.56774	1.8604	5.74514	2.12464	1.08722	0.228321	0.53828
hsa-miR-3937	2.74556	1.71045	0	3.23847	3.10921	2.61322	1.38583	0.229051	0.538739
hsa-miR-520a-5p	3.74875	2.45412	1.41097	5.09886	2.26453	-2.54039	-1.34505	0.228961	0.538739
hsa-miR-24-1-5p	1.21438	9.81649	27.8274	24.1851	8.45666	-2.49378	-1.31834	0.229567	0.539321
hsa-miR-549a-3p	1.66318	0.818041	0.156774	0.344518	2.03118	2.86173	1.51689	0.230904	0.54183
hsa-miR-610	6.07191	15.2453	0.54871	1.72259	5.98178	2.27953	1.18874	0.231186	0.541859
hsa-miR-5571-5p	34.8475	26.921	12.4636	31.6956	32.18	-2.05972	-1.04245	0.23354	0.545928
hsa-miR-6741-3p	73.6813	32.3498	57.4578	45.752	69.3558	1.99491	0.99632	0.233736	0.545928
hsa-miR-4777-3p	1.53118	1.04114	0	2.82505	2.23824	3.21056	1.68283	0.233499	0.545928
hsa-miR-3660	0.316795	3.4209	0.783872	7.7172	7.99981	2.8869	1.52952	0.235695	0.549864
hsa-miR-4637	1.39918	2.82596	4.31129	1.65369	1.56447	-2.62616	-1.39295	0.23634	0.550093
hsa-miR-764	2.82476	0.818041	1.64613	2.61834	1.99502	2.29604	1.19915	0.236165	0.550093
hsa-miR-548a-5p	5.20072	17.9969	16.4613	20.3955	14.8821	-2.14358	-1.10002	0.238348	0.550587
hsa-miR-5739	3.77515	5.87502	2.03807	1.58478	5.34745	2.06992	1.04958	0.238404	0.550587
hsa-miR-3130-3p	3.48475	2.30539	1.64613	1.79149	1.46258	-2.27509	-1.18592	0.238023	0.550587
hsa-miR-873-3p	2.00637	3.1978	6.74129	3.72079	2.62607	-2.3406	-1.22688	0.239016	0.550587
hsa-miR-574-5p	233.425	575.008	821.341	1858.81	812.671	-2.07955	-1.05627	0.238474	0.550587
hsa-miR-6867-5p	13.4374	13.0143	6.66291	8.81966	11.6316	1.94083	0.956672	0.238999	0.550587
hsa-miR-374c-5p	3.27355	8.25478	19.5968	13.3673	6.43206	-2.17088	-1.11828	0.237184	0.550587
hsa-miR-6881-3p	22.6509	6.24686	3.76258	5.719	6.20199	-2.13259	-1.09261	0.237291	0.550587
hsa-miR-1304-5p	22.4397	4.83388	7.83872	3.23847	7.81904	-2.08535	-1.06029	0.237692	0.550587
hsa-miR-6715a-3p	4.96313	12.2706	12.8555	8.13062	9.92581	-2.09618	-1.06777	0.239403	0.550845
hsa-miR-4305	3.74875	1.93355	5.01678	1.8604	1.29496	-2.40034	-1.26324	0.240164	0.551336
hsa-miR-544a	0.844788	4.23894	3.0571	1.9293	1.7781	-2.85841	-1.51521	0.239962	0.551336
hsa-miR-3148	7.39189	3.49527	0.156774	2.61834	6.45835	2.33799	1.22527	0.24044	0.55134
hsa-miR-3665	7.60309	4.61078	4.38968	7.16597	8.05897	2.09048	1.06384	0.241327	0.552744
hsa-miR-3910	11.8006	1.18988	3.44903	0.0689036	2.81012	-2.32012	-1.2142	0.241678	0.552918
hsa-miR-5190	7.65589	7.5111	5.01678	0.551228	2.55705	-2.04149	-1.02963	0.242425	0.553996
hsa-miR-6801-3p	3.51115	2.15665	0.470323	4.96106	4.21354	2.33178	1.22143	0.243683	0.555456
hsa-miR-11181-3p	5.30632	4.09021	3.44903	0.757939	4.06235	2.00433	1.00312	0.243892	0.555456
hsa-miR-8068	12.3022	6.32123	5.95742	7.44158	8.21344	-1.96312	-0.97315	0.243463	0.555456
hsa-miR-3685	1.10878	0.966776	2.97871	2.41162	2.65893	2.5184	1.33251	0.2443	0.555755
hsa-miR-100-3p	11.9062	86.043	16.0694	23.0138	21.5344	-2.01227	-1.00883	0.244633	0.555883
hsa-miR-1253	32.9203	15.1709	47.1107	46.8544	47.9988	2.04515	1.03221	0.245156	0.556444
hsa-miR-718	4.27674	4.23894	8.46581	19.0863	8.78204	2.02726	1.01953	0.246523	0.558916
hsa-miR-12124	16.5262	0.520572	2.50839	1.24026	3.33271	-2.36188	-1.23993	0.248117	0.560633
hsa-miR-513c-5p	2.27037	1.41298	3.21387	2.96285	1.90299	2.15602	1.10837	0.247643	0.560633
hsa-miR-3680-3p	3.72235	1.71045	0.862259	0.689036	2.74439	2.24314	1.16552	0.247935	0.560633
hsa-miR-4521	35.0059	121.144	95.0052	229.104	95.0051	-2.15172	-1.10549	0.248456	0.560769
hsa-miR-129-1-3p	62.4087	24.1694	21.4781	37.2079	21.4457	-2.03449	-1.02467	0.251391	0.565884
hsa-miR-27b-5p	4.85753	5.20572	10.5823	26.0455	15.1352	1.82065	0.864457	0.251143	0.565884
hsa-miR-1238-3p	8.44788	0.148735	3.52742	3.30737	3.84872	-2.4418	-1.28794	0.251567	0.565884
hsa-miR-6798-5p	1.02959	5.13135	1.8029	0.275614	0.963001	-2.7305	-1.44916	0.252436	0.567205
hsa-miR-4491	7.81429	6.6187	1.95968	3.16956	3.86186	-2.08772	-1.06193	0.253386	0.568706
hsa-miR-4506	7.2335	1.63608	0.0783872	2.06711	3.55291	2.33611	1.22411	0.25389	0.569163
hsa-miR-3663-5p	11.563	29.5238	9.72001	5.58119	10.1592	-1.84025	-0.879898	0.254156	0.569163
hsa-miR-4999-5p	12.1702	1.33861	0.235161	1.24026	2.9876	-2.73034	-1.44908	0.254495	0.569287
hsa-miR-2681-5p	24.314	0	6.03581	8.54404	6.84618	-2.5624	-1.3575	0.25549	0.570877
hsa-miR-4715-3p	1.74237	1.56171	3.52742	7.09707	3.83886	2.23856	1.16257	0.255887	0.57113
hsa-miR-3194-3p	6.33591	6.09812	6.27097	2.34272	3.61865	-1.96873	-0.977263	0.256423	0.571693
hsa-miR-139-5p	1228.9	12065.2	10548	21.0156	3762.31	-2.20324	-1.13963	0.256749	0.571785
hsa-miR-1208	2.77196	2.67723	1.25419	0.275614	1.95558	2.15573	1.10818	0.257406	0.572614
hsa-miR-3668	12.8038	4.38767	4.15452	3.99641	3.36229	-1.92223	-0.942778	0.258054	0.572789
hsa-miR-8071	2.79836	14.0554	14.0313	18.8107	6.69499	-2.31968	-1.21393	0.257826	0.572789
hsa-miR-135a-3p	17.4765	6.02376	8.30904	29.7663	17.4983	1.95762	0.969104	0.258981	0.573581
hsa-miR-5693	8.50068	65.6664	5.4871	7.44158	9.7549	-2.1438	-1.10017	0.258814	0.573581
hsa-miR-548b-3p	4.11834	4.98261	2.11645	0.96465	3.13879	2.00657	1.00473	0.259432	0.573636
hsa-miR-4635	9.16067	6.69306	3.13549	2.48053	10.5667	1.86527	0.899383	0.259577	0.573636
hsa-miR-5694	1.47838	0.669306	4.93839	2.89395	2.80026	2.25326	1.17201	0.260312	0.57463
hsa-miR-4327	22.9941	60.535	59.9662	113.071	41.4189	-2.04162	-1.02972	0.260643	0.57473
hsa-miR-636	6.8111	19.7074	20.0671	3.7897	14.6652	1.90623	0.930726	0.261649	0.57525
hsa-let-7e-3p	50.3441	352.055	331.734	583.338	325.977	2.10182	1.07164	0.261424	0.57525
hsa-miR-5001-3p	36.9067	16.2865	25.319	28.8017	15.0892	-2.0333	-1.02382	0.261737	0.57525
hsa-miR-670-3p	0.65999	2.23102	2.90032	0.551228	2.65565	2.44834	1.2918	0.263184	0.577797
hsa-miR-320a-3p	103.751	901.556	684.947	1585.13	611.377	-2.09058	-1.06391	0.264184	0.578074
hsa-miR-1252-3p	1.29358	5.35445	2.90032	0.551228	1.81097	-2.64428	-1.40287	0.265442	0.578074
hsa-miR-188-5p	7.81429	7.13927	22.4187	10.1288	6.40905	-1.87138	-0.904102	0.265609	0.578074
hsa-miR-1281	7.62949	3.8671	11.2094	20.3955	12.1509	1.84927	0.886954	0.264982	0.578074
hsa-miR-5093	5.78152	4.38767	5.72226	4.47873	3.92102	1.93679	0.953666	0.263806	0.578074
hsa-miR-1288-3p	7.0223	2.37976	9.64162	7.44158	3.44445	-2.07326	-1.0519	0.265594	0.578074
hsa-miR-4436b-5p	9.50386	3.56963	4.15452	4.27202	11.0236	1.85481	0.891268	0.264845	0.578074
hsa-miR-3944-3p	13.5958	4.61078	6.34936	3.10066	4.56193	-1.89218	-0.920047	0.265185	0.578074
hsa-miR-1255b-2-3p	7.31269	4.83388	12.0716	10.6111	14.2445	-1.90056	-0.926427	0.266483	0.579349
hsa-miR-6755-5p	11.431	8.62661	7.21162	11.7825	4.25955	-1.8958	-0.922804	0.267082	0.580024
hsa-miR-593-5p	2.82476	0.148735	3.21387	0.344518	1.8274	2.28815	1.19418	0.268361	0.582173
hsa-miR-6731-5p	25.5284	23.3514	26.4165	40.6531	23.4243	-1.84818	-0.886106	0.269929	0.584944
hsa-miR-922	4.11834	2.00792	0.235161	17.9838	5.77143	-2.35063	-1.23305	0.270337	0.585197
hsa-miR-3171	1.63678	4.75951	5.01678	0.344518	1.63349	-2.58334	-1.36924	0.271333	0.58663
hsa-miR-6721-5p	4.30314	1.78482	1.25419	1.9293	2.71809	2.22592	1.1544	0.271583	0.58663
hsa-miR-33b-3p	6.9431	16.1377	7.60355	26.1834	12.1969	-2.00792	-1.0057	0.272391	0.587115
hsa-miR-6839-3p	16.975	9.07282	8.30904	10.9557	15.7728	1.87732	0.908676	0.272263	0.587115
hsa-miR-582-3p	2.29677	0.892408	4.15452	3.9275	2.55705	2.13739	1.09585	0.274467	0.590955
hsa-miR-1289	1.37278	0.0743674	1.72452	1.10246	1.54146	2.633	1.39671	0.275246	0.591999
hsa-miR-515-5p	29.6732	21.4178	26.4165	30.731	22.6124	-1.9034	-0.928578	0.275941	0.59286
hsa-miR-8066	14.8102	23.5745	7.52517	3.16956	5.57423	-1.91935	-0.940619	0.27907	0.594243
hsa-miR-4464	7.0223	8.10604	2.90032	0.0689036	3.38201	-2.00597	-1.0043	0.279387	0.594243
hsa-miR-3620-3p	7.0487	3.34653	5.56549	13.4362	14.9314	1.73538	0.795252	0.280559	0.594243
hsa-miR-4793-5p	13.4374	21.6409	22.3403	40.1708	13.0777	-1.82869	-0.870808	0.280269	0.594243
hsa-miR-6840-5p	8.02548	25.2849	12.15	19.8442	12.9627	-1.87309	-0.905419	0.280181	0.594243
hsa-miR-2116-3p	7.76149	6.6187	9.56323	6.75255	5.04836	-1.79304	-0.84241	0.277869	0.594243
hsa-miR-6759-3p	6.15111	0.0743674	2.58678	0.344518	1.84712	-2.38365	-1.25318	0.279309	0.594243
hsa-miR-6753-3p	29.6204	14.2042	9.40646	6.20132	11.1945	-1.94868	-0.962499	0.277647	0.594243
hsa-miR-23a-3p	1157.39	11257.9	7907.62	11484.8	7088.99	2.09908	1.06975	0.277936	0.594243
hsa-miR-4713-5p	13.3318	10.7089	7.60355	8.61294	7.0631	-1.80222	-0.849776	0.277269	0.594243
hsa-miR-6873-3p	16.5526	31.9036	17.01	14.4697	14.5107	-1.78079	-0.832513	0.280602	0.594243
hsa-miR-4727-5p	18.0045	22.0127	9.95517	8.26843	14.5469	1.7826	0.833979	0.279198	0.594243
hsa-miR-33a-5p	21.3837	33.1678	90.6939	82.133	71.4494	1.88543	0.914895	0.280309	0.594243
hsa-miR-4503	13.5958	7.288	8.93614	5.719	16.2297	1.98317	0.987808	0.280722	0.594243
hsa-miR-4421	1057.65	816.405	973.49	3010.6	1625.86	-1.98016	-0.985616	0.281695	0.595676
hsa-miR-6814-5p	11.4046	78.6063	9.48485	1.58478	21.587	2.22732	1.15531	0.282329	0.595765
hsa-miR-155-5p	1714.26	3661.4	4081.31	2398.4	2321.12	-1.99308	-0.995001	0.282049	0.595765
hsa-miR-653-3p	10.2959	5.50319	7.68194	3.8586	4.23326	-1.94082	-0.956665	0.283343	0.597278
hsa-miR-4330	7.1015	15.0966	14.1881	2.27382	9.18959	-1.95014	-0.963581	0.283882	0.597788
hsa-miR-6720-3p	15.8662	6.99053	6.34936	24.4608	13.6891	-1.75839	-0.814259	0.28421	0.597852
hsa-miR-6822-3p	6.28311	2.90033	5.01678	2.96285	6.62268	1.88587	0.915231	0.285628	0.600208
hsa-miR-3158-5p	1.61038	1.41298	1.01903	0.482325	1.94243	2.38046	1.25124	0.286227	0.600837
hsa-miR-320a-5p	3.74875	1.18988	2.50839	6.75255	2.07062	-2.10553	-1.07419	0.286723	0.60125
hsa-miR-581	11.8798	3.34653	5.4871	6.89036	4.44689	-1.81114	-0.856899	0.28834	0.604013
hsa-miR-142-5p	3.51115	7.0649	11.0526	0	4.03277	-1.90398	-0.929022	0.289031	0.60483
hsa-miR-512-3p	7.78789	0.148735	4.62484	2.54943	3.11578	-2.34435	-1.22919	0.290801	0.6079
hsa-miR-3123	1.66318	1.26425	2.97871	0.137807	2.50775	2.24447	1.16638	0.292353	0.608987
hsa-miR-6777-3p	2.37597	5.72629	0	0.551228	2.4453	2.36098	1.23938	0.29204	0.608987
hsa-miR-6728-3p	6.8111	5.65192	7.9171	7.64829	6.88233	1.93863	0.955034	0.292508	0.608987
hsa-miR-877-5p	23.7333	32.0523	16.7749	24.4608	30.0667	1.91204	0.935116	0.292532	0.608987
hsa-miR-4776-5p	4.46154	4.83388	4.86	3.7897	3.88487	-2.19772	-1.13601	0.293152	0.609648
hsa-miR-302c-5p	2.58716	7.288	1.01903	0.206711	2.98103	-2.17975	-1.12416	0.293584	0.609915
hsa-miR-4311	13.3318	9.74213	6.50613	4.61654	6.54709	-1.77802	-0.830268	0.295859	0.610855
hsa-miR-302f	11.3254	6.32123	8.93614	4.61654	4.13137	-1.77287	-0.826087	0.295038	0.610855
hsa-miR-4685-5p	3.27355	2.08229	1.33258	0.275614	3.55949	2.05403	1.03846	0.295138	0.610855
hsa-miR-4780	6.5999	5.50319	6.81968	2.96285	5.06808	1.86092	0.896019	0.295479	0.610855
hsa-miR-3661	13.9126	7.13927	17.2452	16.1234	8.86749	-1.72381	-0.785599	0.29443	0.610855
hsa-miR-4782-5p	4.51433	4.75951	6.34936	3.23847	5.63996	1.94386	0.958927	0.295776	0.610855
hsa-miR-622	1.79517	0.743674	0.0783872	0.275614	1.97202	2.51984	1.33333	0.296674	0.611909
hsa-miR-4433b-5p	2.53436	1.93355	0.0783872	2.27382	2.22509	2.42705	1.2792	0.297599	0.613188
hsa-miR-500b-3p	0.237597	2.67723	4.15452	4.96106	4.15767	2.34785	1.23134	0.298257	0.613914
hsa-miR-6765-3p	9.66226	26.326	47.1891	52.4356	28.1571	-1.91617	-0.938229	0.299589	0.616027
hsa-miR-5579-5p	1.63678	0.594939	4.54645	0.757939	1.28181	-2.49565	-1.31941	0.300959	0.618211
hsa-miR-7851-3p	15.6286	27.9621	8.5442	4.75435	15.1812	1.78911	0.839243	0.302218	0.620164
hsa-miR-6513-3p	50.8721	21.5665	21.0078	5.7879	13.1599	-1.95515	-0.967277	0.304462	0.624132
hsa-miR-4428	5.04233	95.7852	7.76033	0.413421	9.51497	-2.13674	-1.09541	0.306032	0.626074
hsa-miR-8078	133.239	117.426	216.74	460.689	264.621	1.86617	0.900082	0.305782	0.626074
hsa-miR-4795-5p	28.0892	9.44466	6.19258	8.81966	8.60785	-1.84227	-0.881486	0.306646	0.626693
hsa-miR-1182	3.48475	4.68514	3.76258	3.30737	3.6548	1.9279	0.947027	0.30824	0.626765
hsa-miR-1914-3p	7.65589	0.818041	1.48936	0.551228	2.63921	-2.14677	-1.10217	0.307754	0.626765
hsa-miR-4312	10.507	4.98261	12.6203	0.344518	4.15109	-1.79014	-0.840071	0.307476	0.626765
hsa-miR-4540	17.6349	3.79274	5.64387	5.92571	5.10423	-1.77829	-0.830488	0.3072	0.626765
hsa-miR-6867-3p	5.54392	8.92408	8.62259	8.06172	6.62597	1.91697	0.938825	0.308048	0.626765
hsa-miR-1266-3p	4.83113	4.98261	7.05484	4.47873	3.58249	-1.79942	-0.847529	0.309585	0.628531
hsa-miR-4743-5p	8.05188	6.46996	4.78162	1.9293	3.00732	-1.82446	-0.867467	0.309733	0.628531
hsa-miR-4449	14.2558	6.17249	6.89807	11.7825	8.26274	-1.75604	-0.812328	0.310203	0.628849
hsa-miR-2467-5p	16.3942	3.71837	3.99774	5.02996	5.42304	-1.77561	-0.828311	0.310664	0.629149
hsa-miR-7973	0.237597	0.371837	3.13549	0.895746	1.54146	2.69405	1.42978	0.311714	0.630641
hsa-miR-185-3p	7.68229	6.24686	7.44678	7.92391	5.48878	-1.8318	-0.873264	0.312306	0.631035
hsa-let-7f-2-3p	2.85116	22.4589	29.8655	28.1816	15.5099	-1.84105	-0.880528	0.312537	0.631035
hsa-miR-1275	5.27992	4.31331	9.32807	20.3955	6.46492	-2.08712	-1.06152	0.313204	0.631749
hsa-miR-1298-3p	8.15748	1.11551	1.17581	4.47873	3.0139	-2.16645	-1.11533	0.315297	0.632333
hsa-miR-3691-3p	10.771	14.4273	9.95517	12.2648	12.1772	1.7169	0.779809	0.314407	0.632333
hsa-miR-4285	5.09513	4.09021	3.76258	4.89215	3.89473	1.87638	0.907954	0.315381	0.632333
hsa-miR-4252	5.99271	0.297469	1.88129	5.65009	3.92431	2.00737	1.00531	0.314975	0.632333
hsa-miR-4284	17.0014	11.4526	23.1242	7.44158	15.2601	1.78572	0.836502	0.314745	0.632333
hsa-miR-4666b	46.2521	23.9463	38.0178	36.8634	37.3795	1.84963	0.887238	0.314326	0.632333
hsa-miR-623	16.8694	23.6488	6.42775	13.6429	9.86008	-1.80121	-0.84897	0.316593	0.634131
hsa-miR-758-5p	4.67273	2.52849	1.01903	1.03355	2.96788	1.93403	0.951612	0.317586	0.634856
hsa-miR-383-3p	2.90396	0.297469	1.25419	0.275614	2.43215	2.14158	1.09868	0.317416	0.634856
hsa-miR-1178-5p	7.78789	1.48735	0.862259	1.65369	2.82327	-2.07077	-1.05017	0.318975	0.636368
hsa-miR-4485-5p	10.9294	9.07282	15.3639	19.0863	17.1664	1.70502	0.769786	0.31878	0.636368
hsa-miR-548av-3p	1.76877	2.15665	5.95742	8.33733	3.79284	2.04874	1.03474	0.321449	0.640668
hsa-miR-146b-3p	133.688	112.592	239.081	255.012	202.053	1.82847	0.870638	0.322558	0.642241
hsa-miR-7152-3p	9.97906	7.88294	16.7749	9.99102	13.5576	1.67526	0.744381	0.323746	0.64397
hsa-miR-3617-5p	3.61675	6.17249	8.5442	9.57759	5.17983	-1.87402	-0.90614	0.324805	0.644704
hsa-miR-3168	0.0791989	2.60286	0.0783872	0.137807	1.4823	2.75437	1.46172	0.325322	0.644704
hsa-miR-339-5p	9.68866	19.4099	21.4781	19.0174	19.7826	1.76937	0.823239	0.325931	0.644704
hsa-miR-6511a-3p	7.2071	4.01584	5.95742	17.2948	5.49535	-1.84387	-0.88274	0.325659	0.644704
hsa-miR-146a-3p	43.5594	8.70098	9.87678	6.20132	12.9726	-1.9606	-0.971294	0.326039	0.644704
hsa-miR-655-5p	4.22394	13.6092	9.09291	24.0473	6.99408	-1.84665	-0.884914	0.325173	0.644704
hsa-miR-4299	13.5958	9.81649	12.0716	15.2966	10.0178	-1.6585	-0.729882	0.326661	0.6453
hsa-miR-4682	7.97268	1.93355	0.313549	0.137807	3.11907	1.93854	0.954972	0.327298	0.645924
hsa-miR-3677-3p	7.60309	1.41298	10.5823	23.8406	10.1197	-1.86182	-0.896717	0.327679	0.646042
hsa-miR-2681-3p	2.53436	3.12343	3.60581	3.10066	2.04761	1.9153	0.937572	0.329394	0.648787
hsa-miR-6825-3p	0.844788	3.27216	6.89807	1.58478	2.55376	-2.46011	-1.29873	0.329888	0.64887
hsa-miR-450a-1-3p	32.3395	15.8402	10.1119	11.9203	19.0431	1.89193	0.919859	0.330082	0.64887
[truncated: 1,071 more rows]

## Sheet: Sheet2
© 2000-2024 QIAGEN. All rights reserved.
[truncated: 1,001 more rows]
